# Supplementary material for: The atmospheric chemistry box model CAABA/MECCA-4.0gmdd
Source: Copernicus journal article supplement (doi:10.5194/gmd-2018-201), 2018-09-03

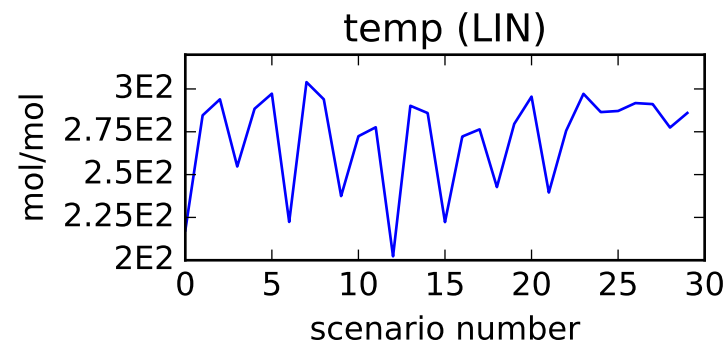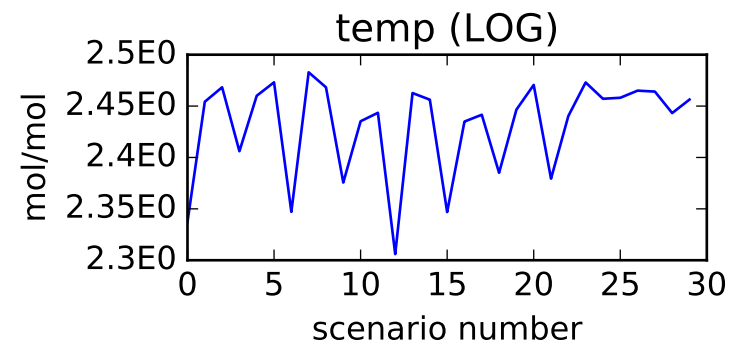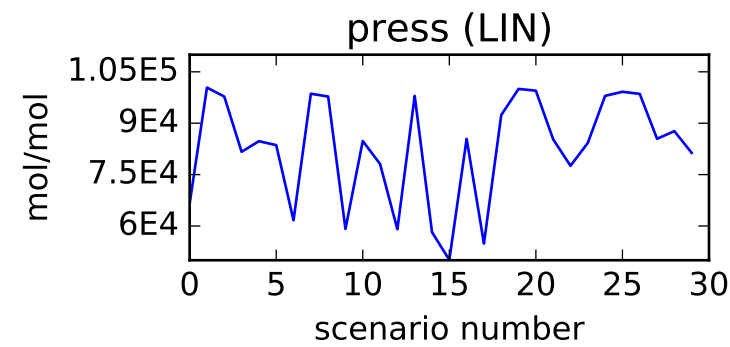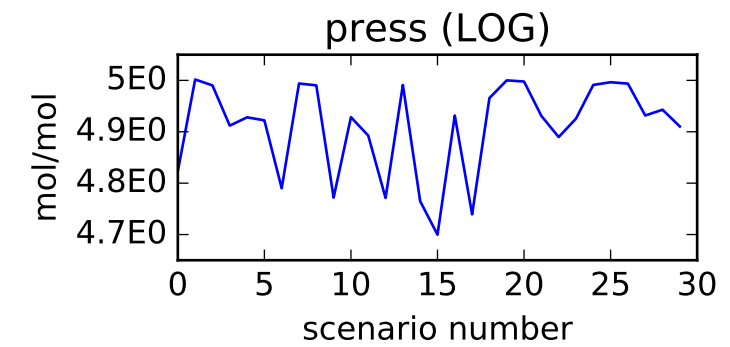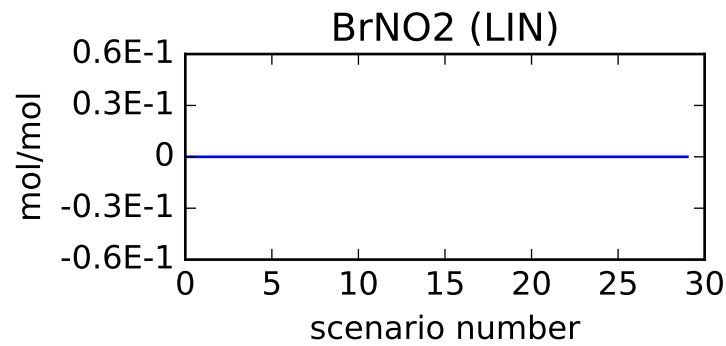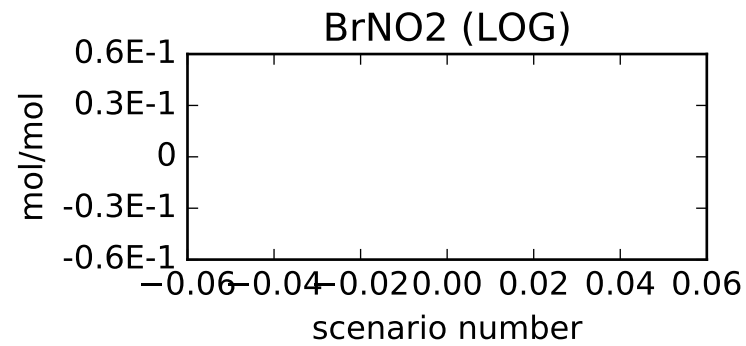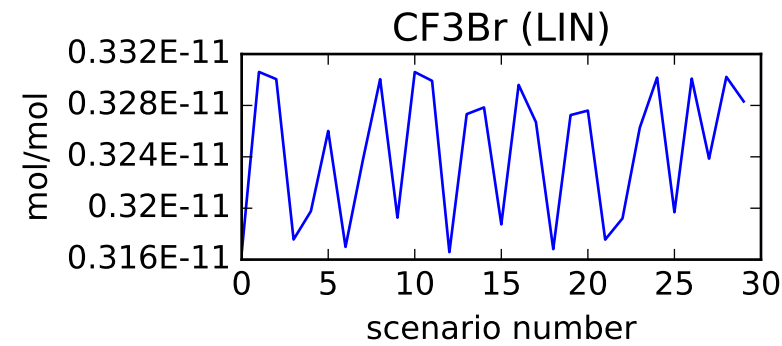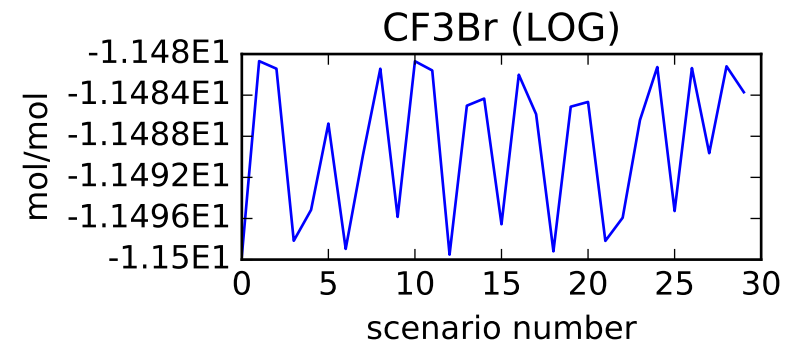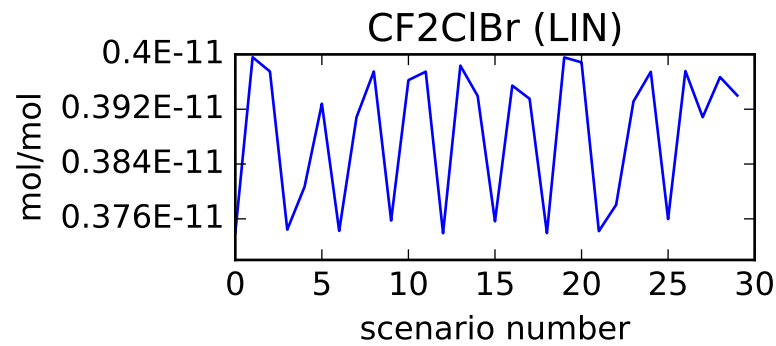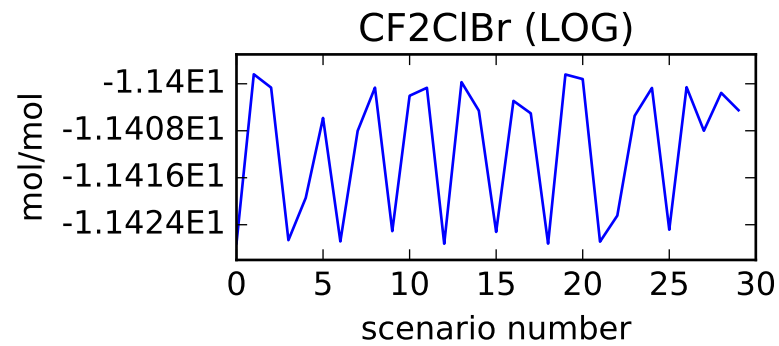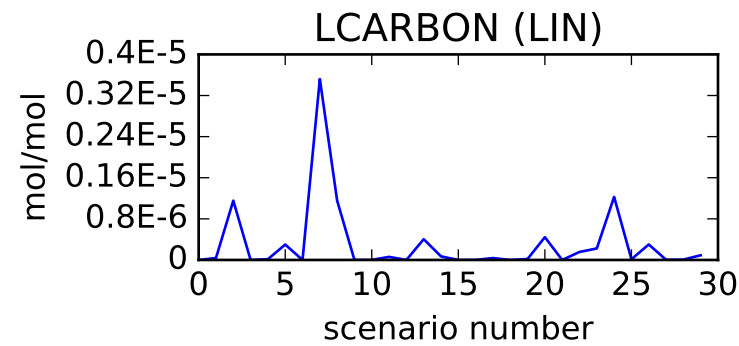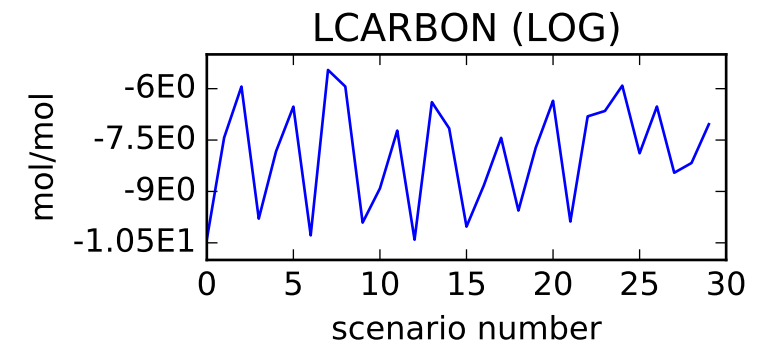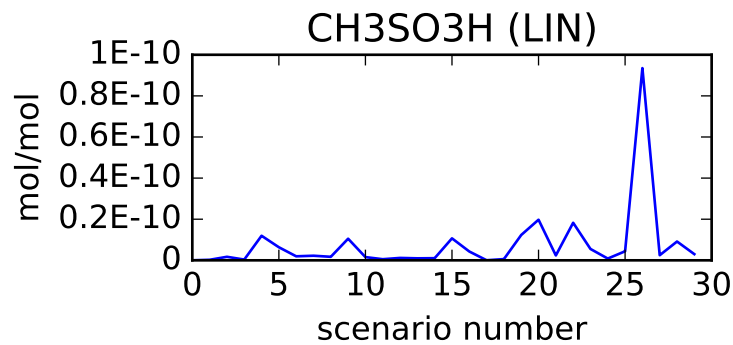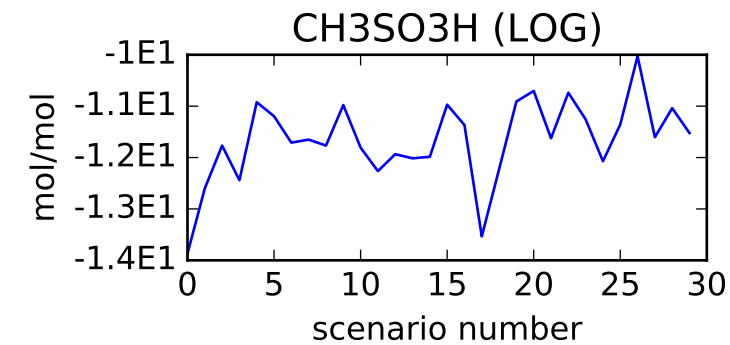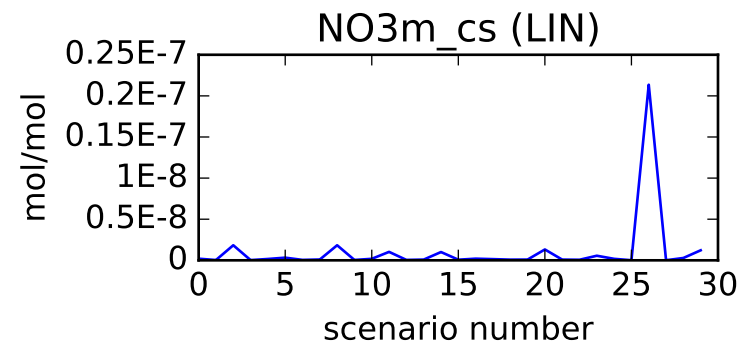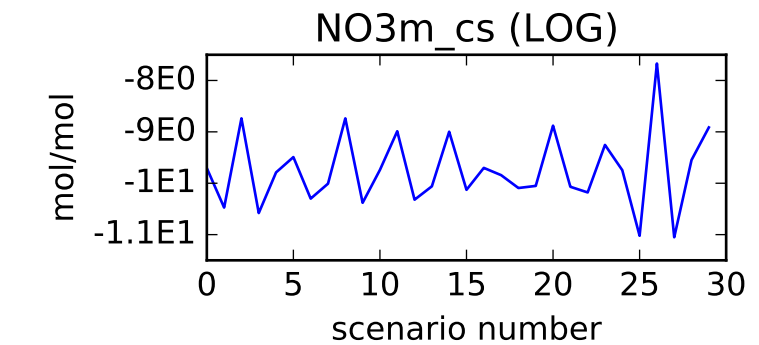

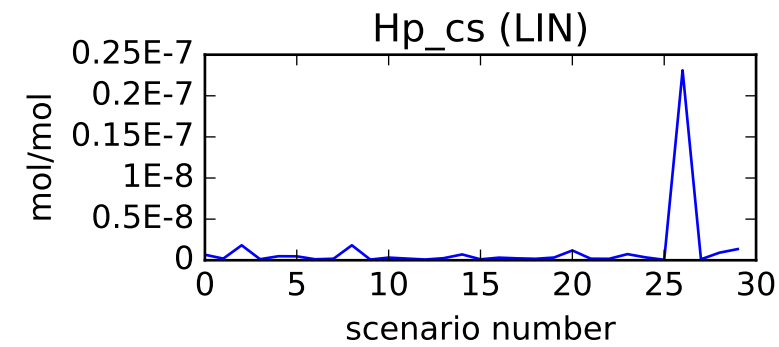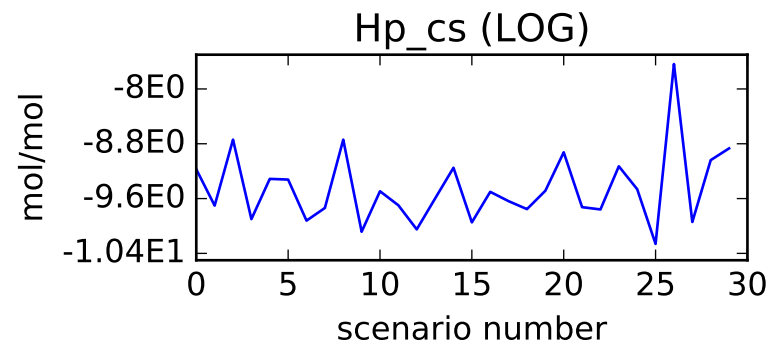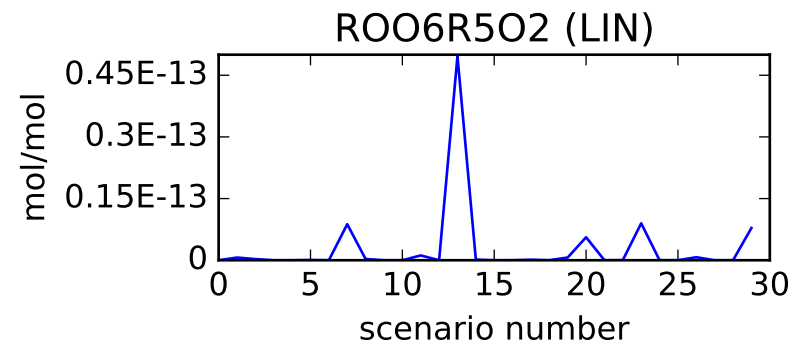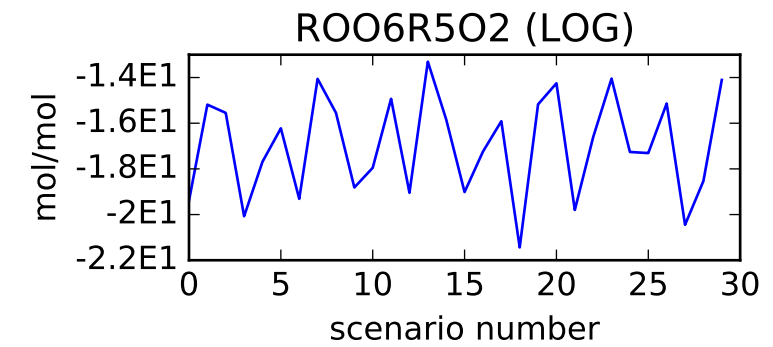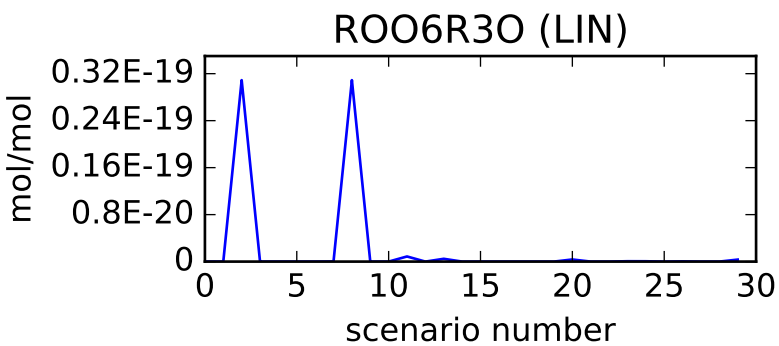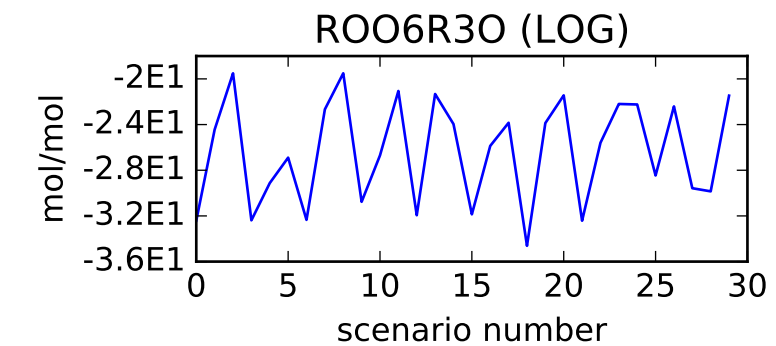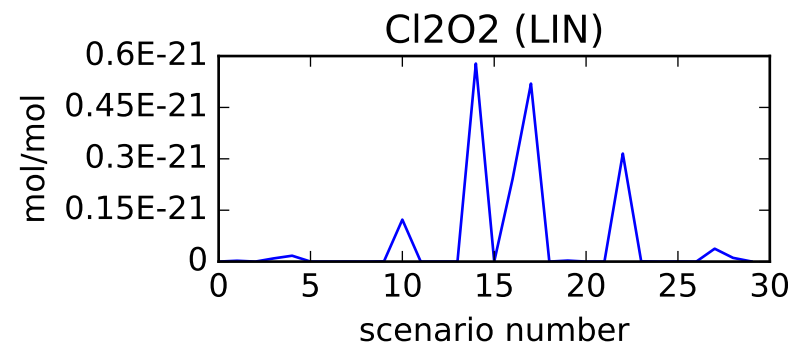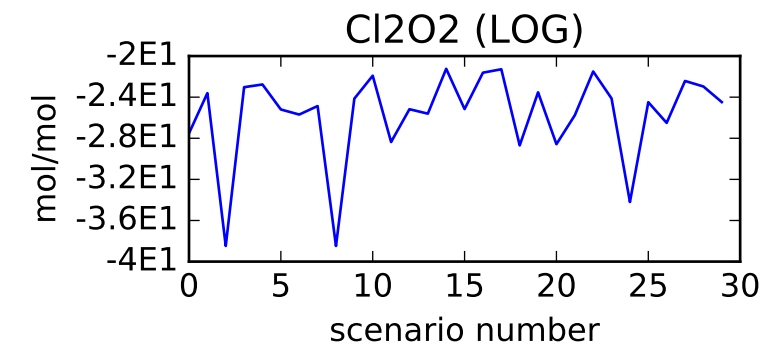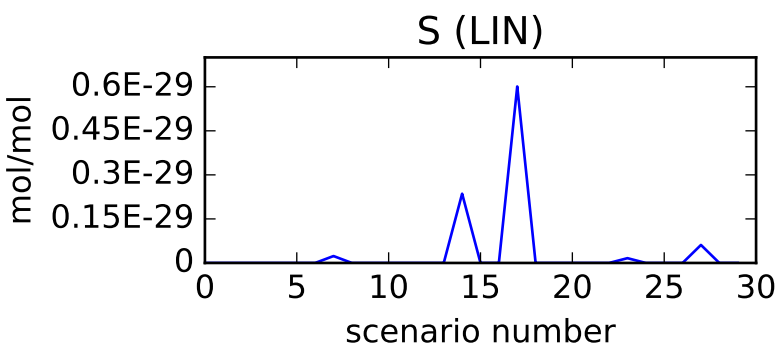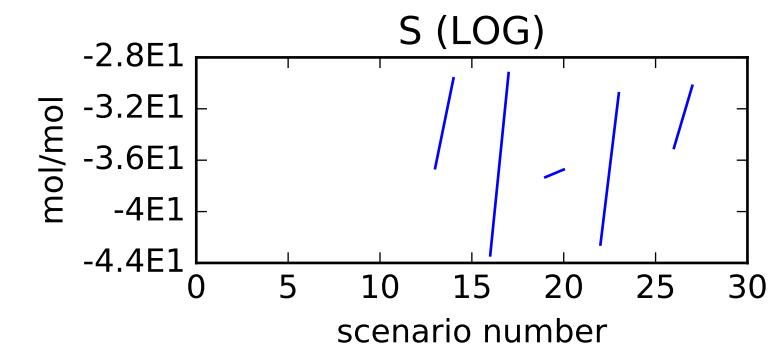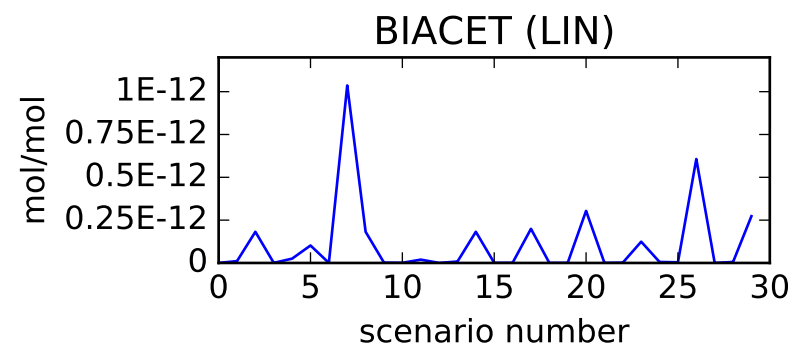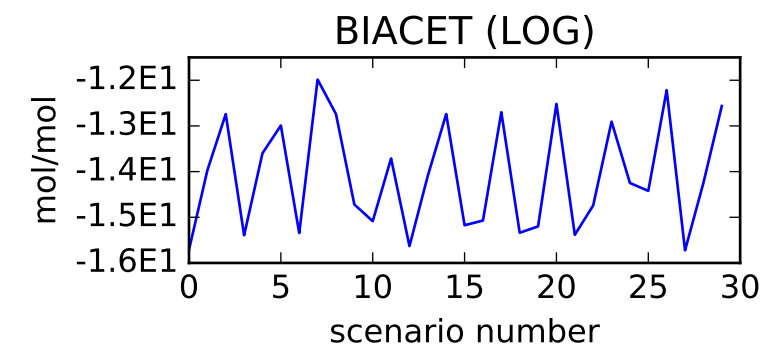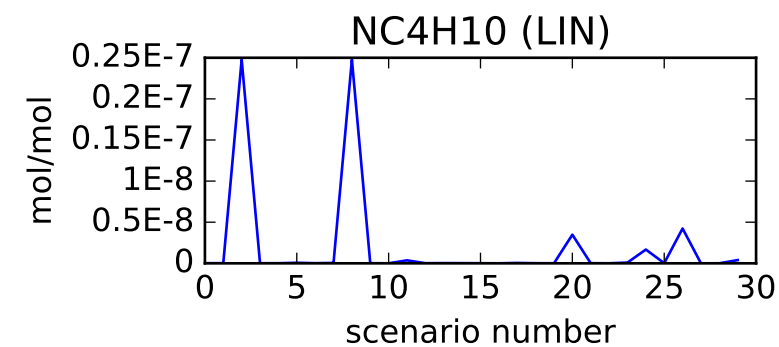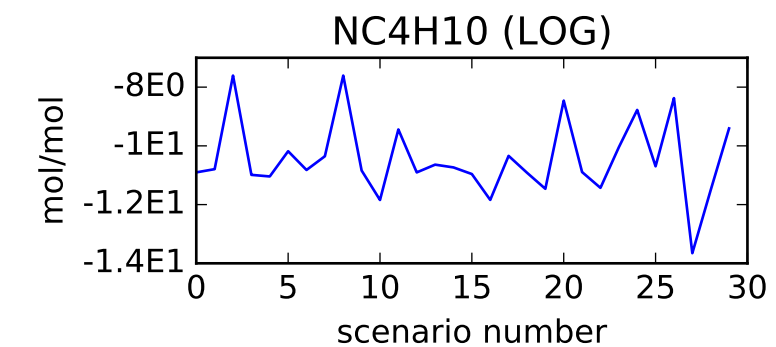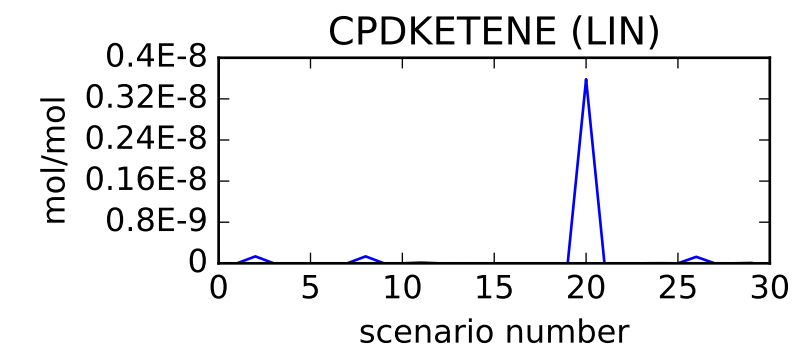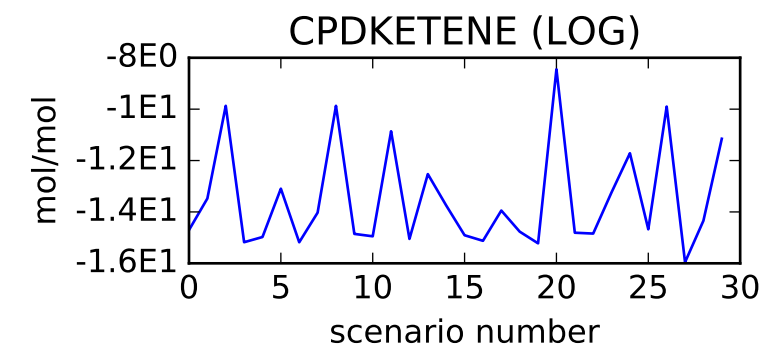

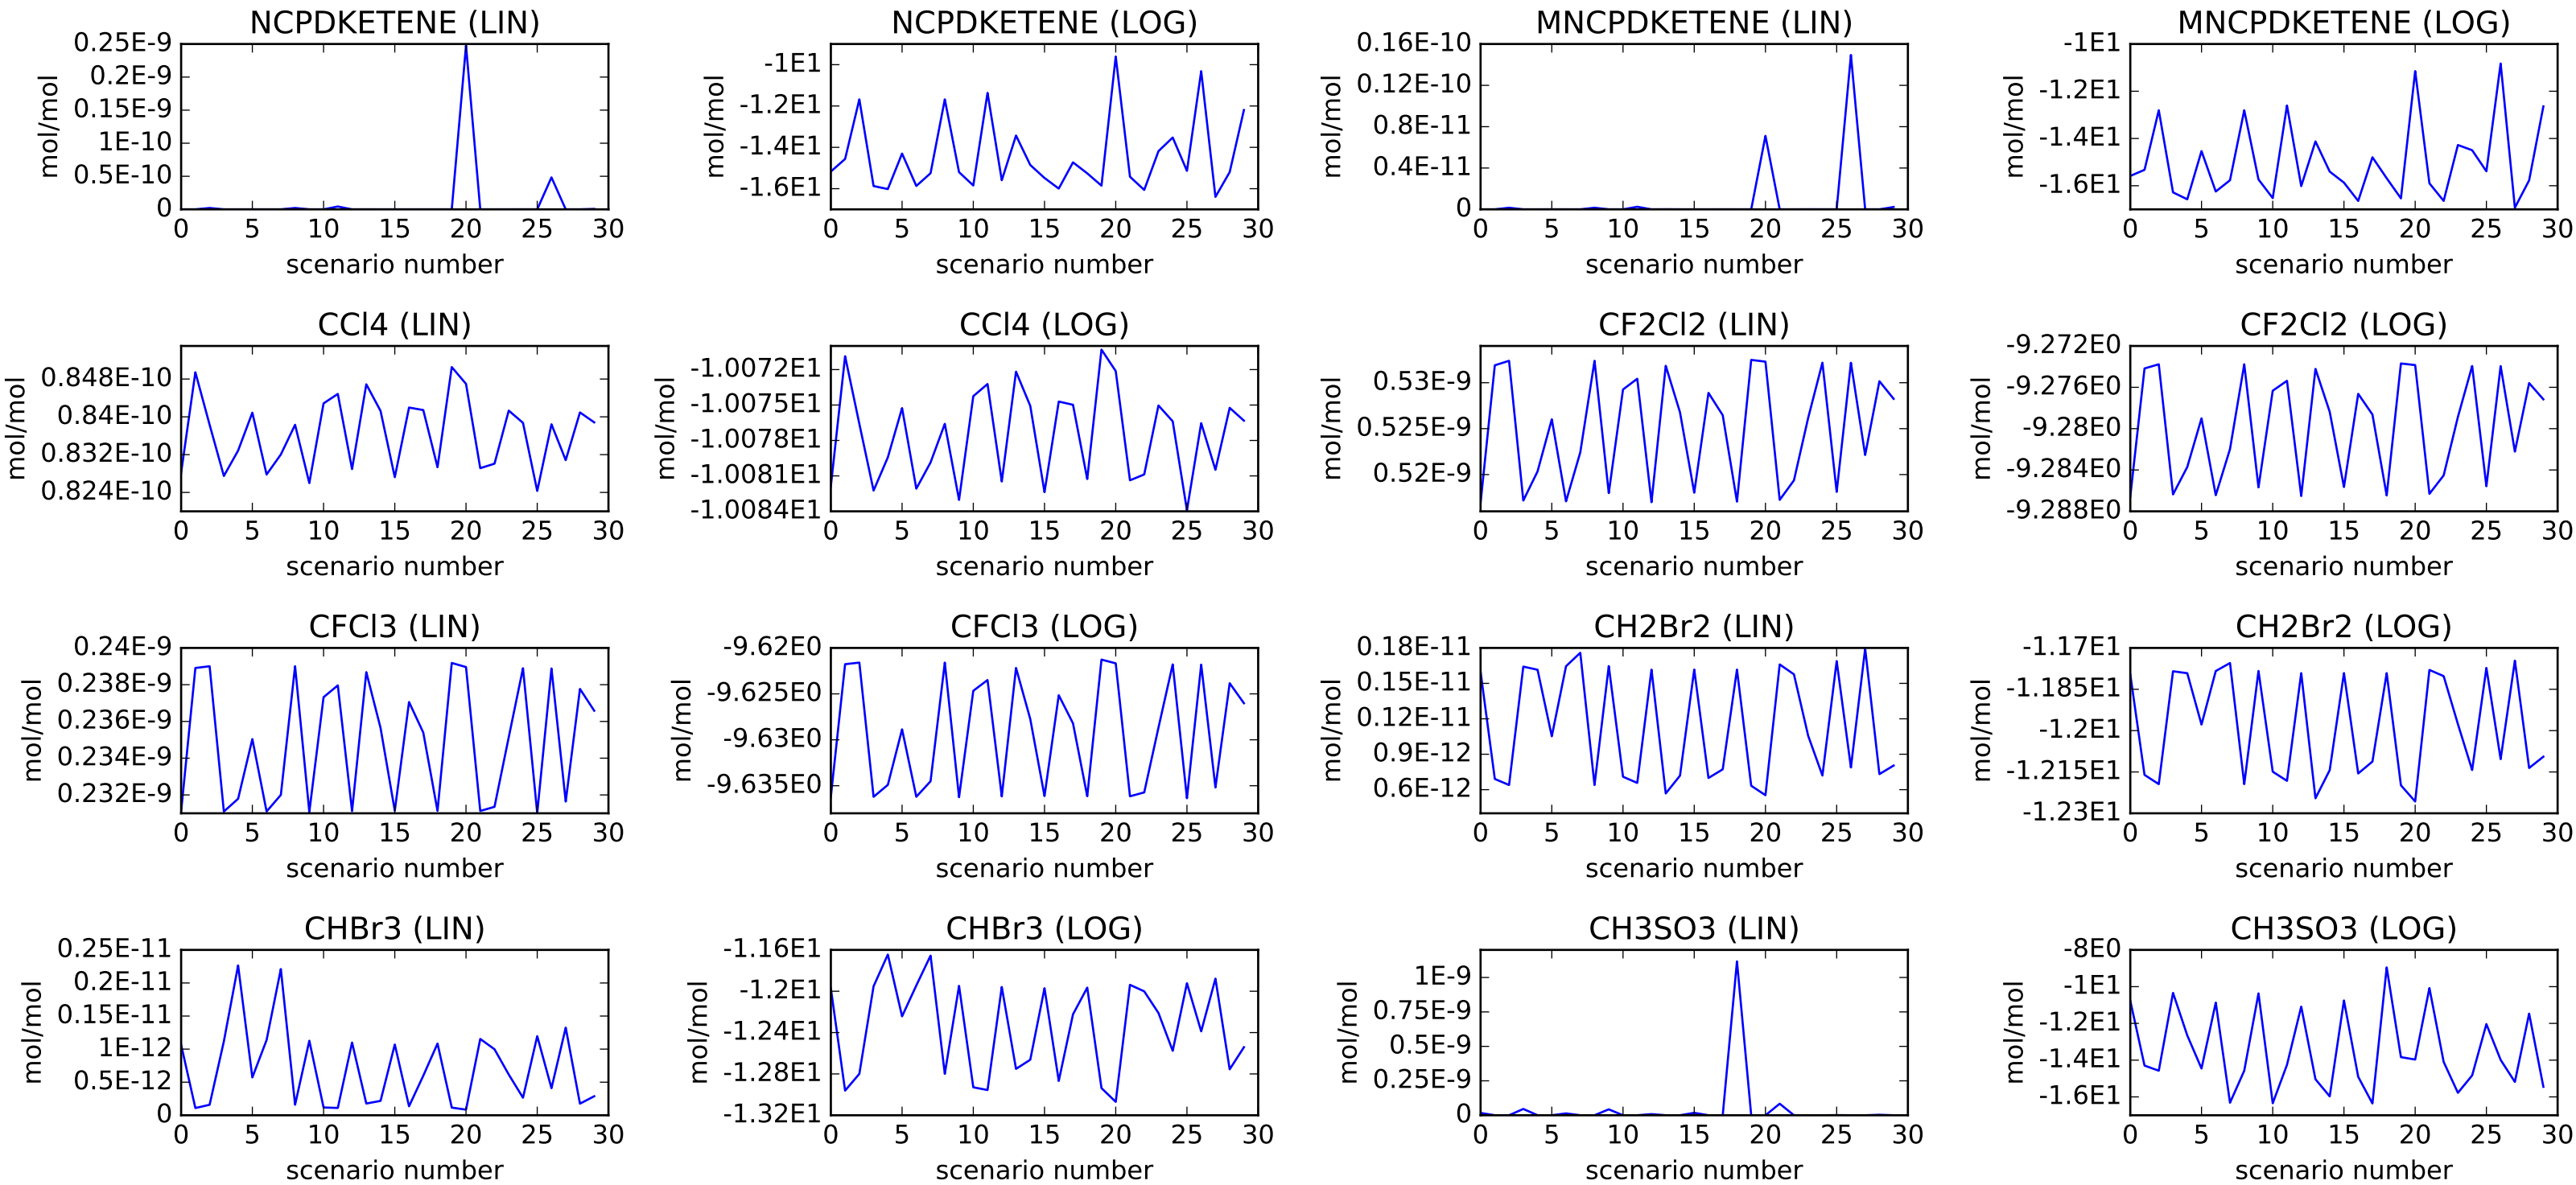

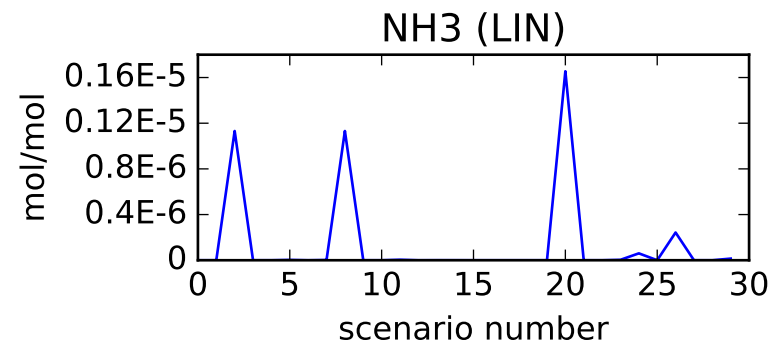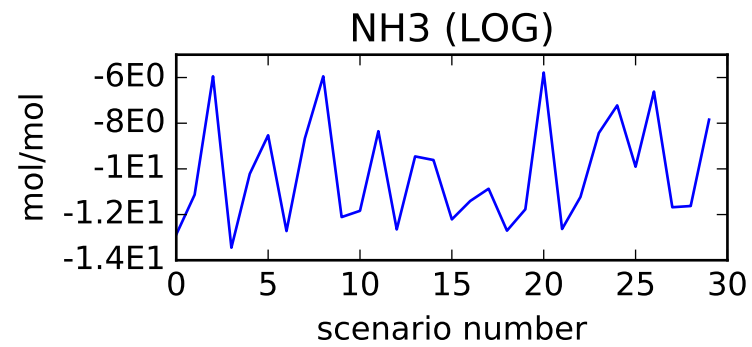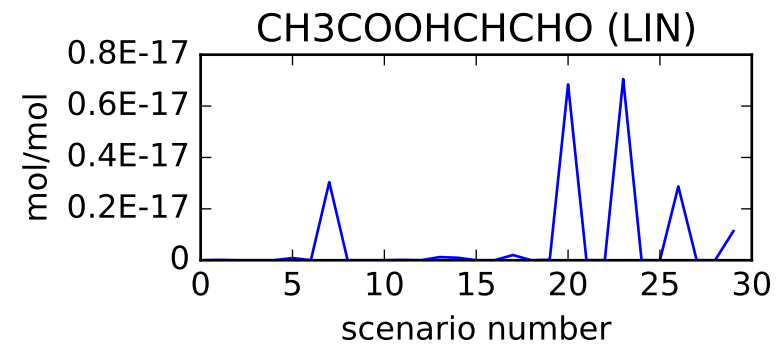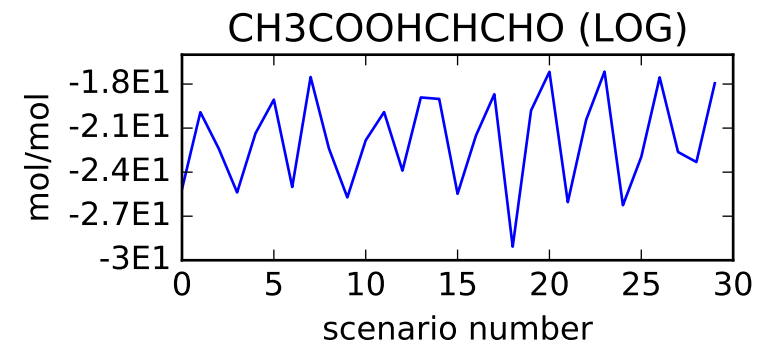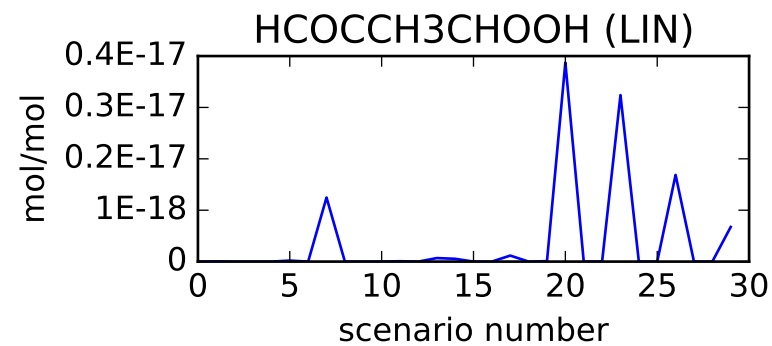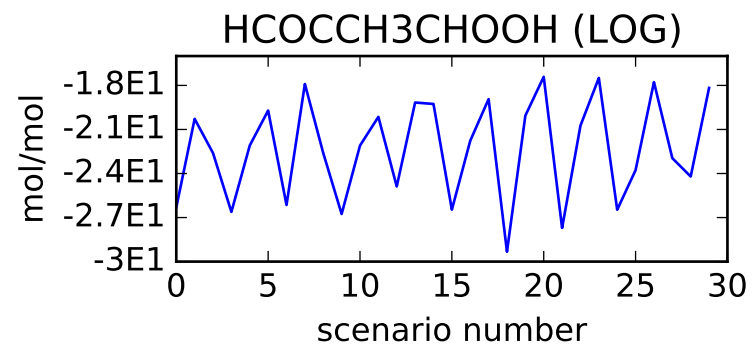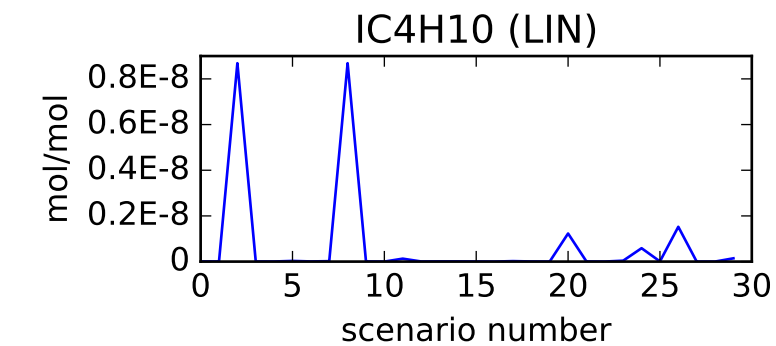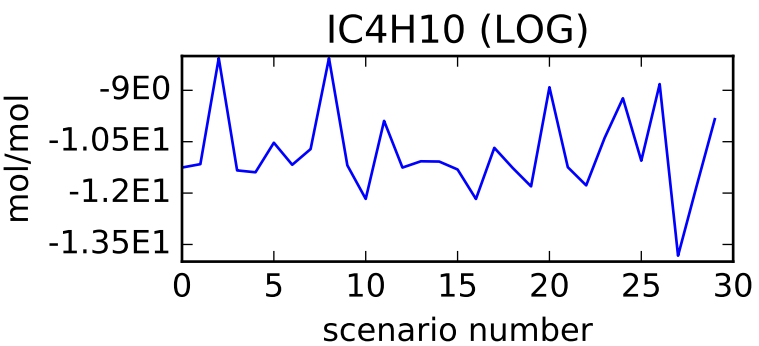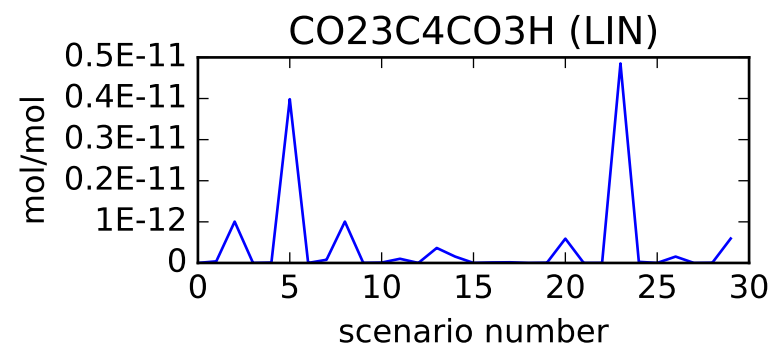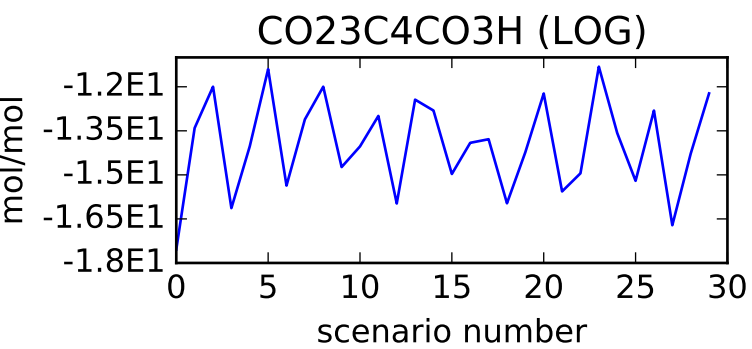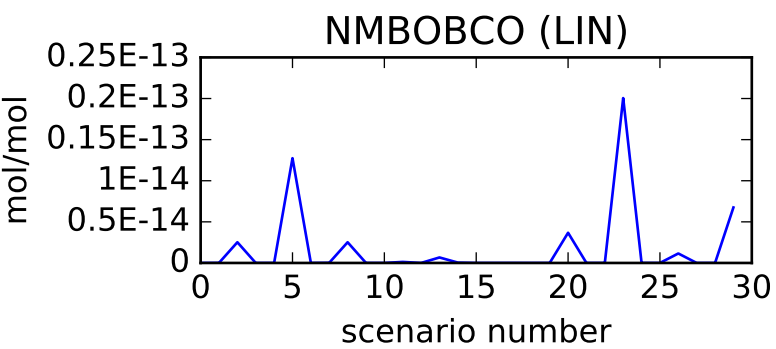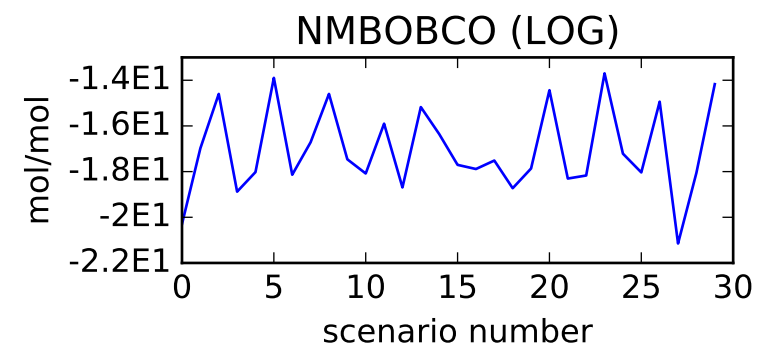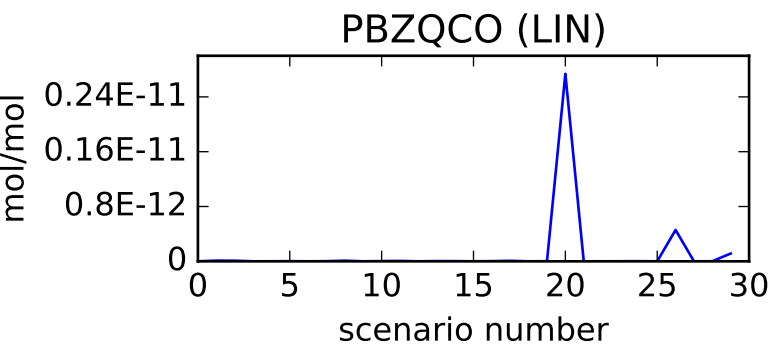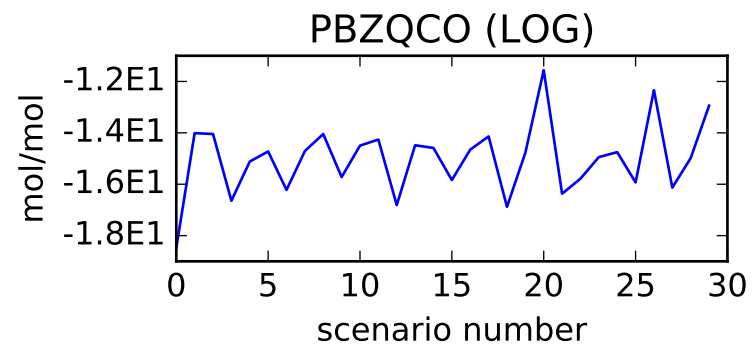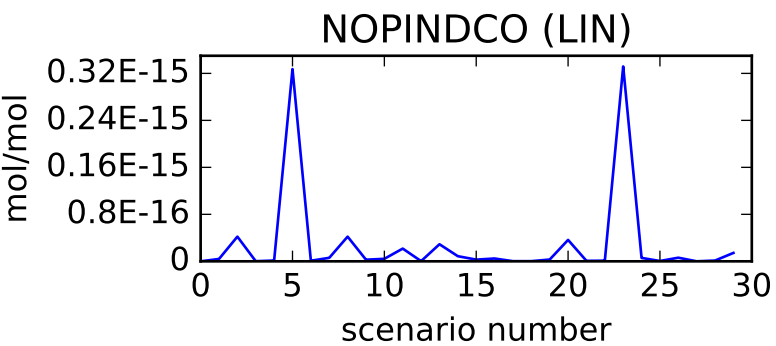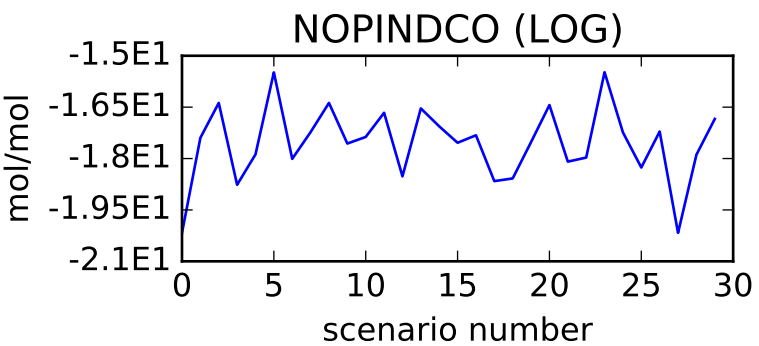

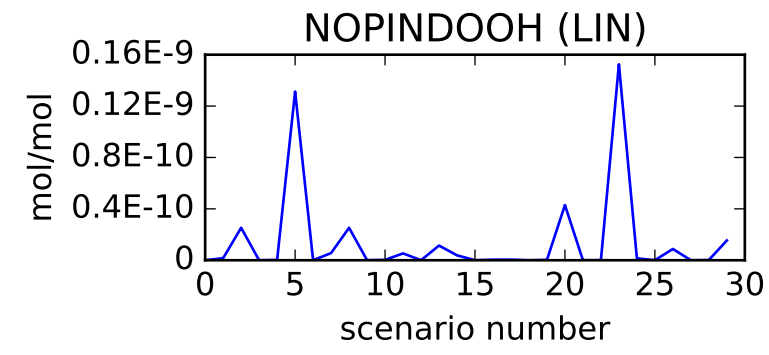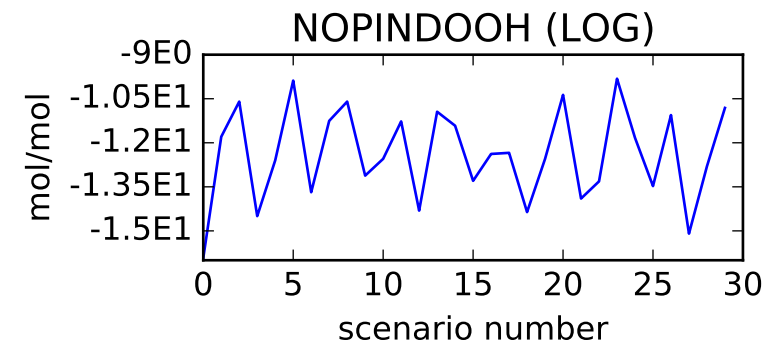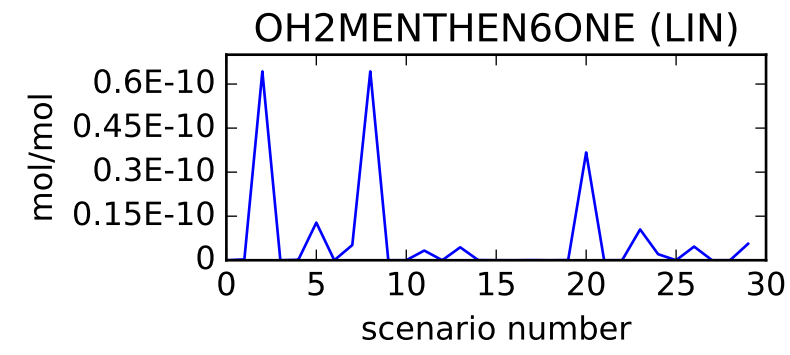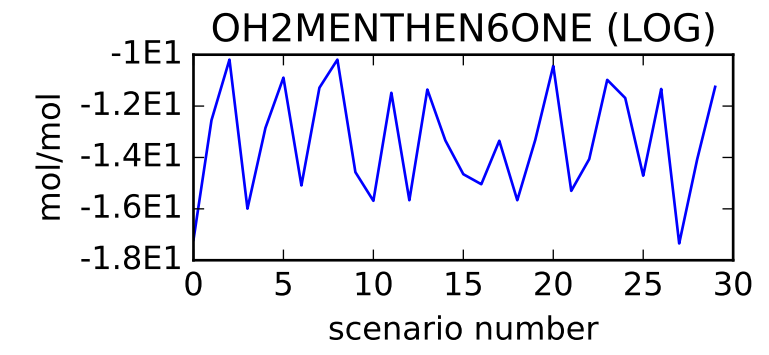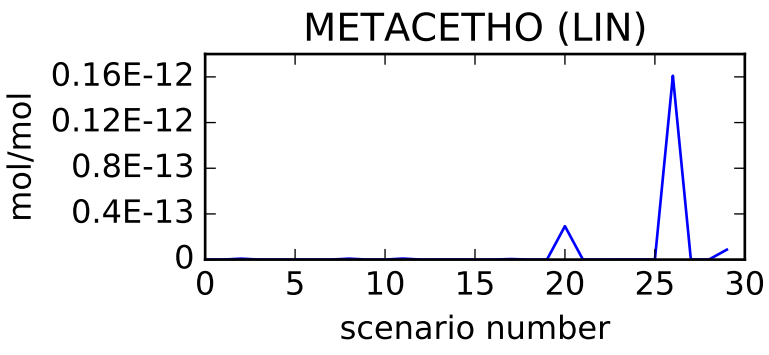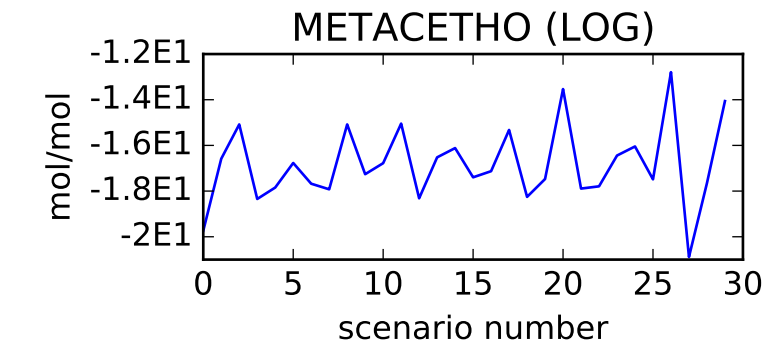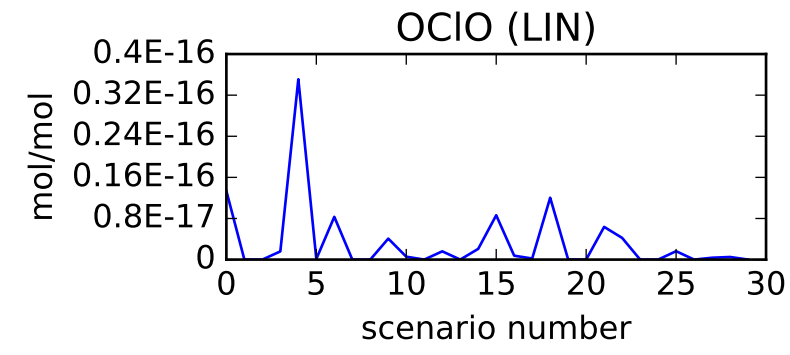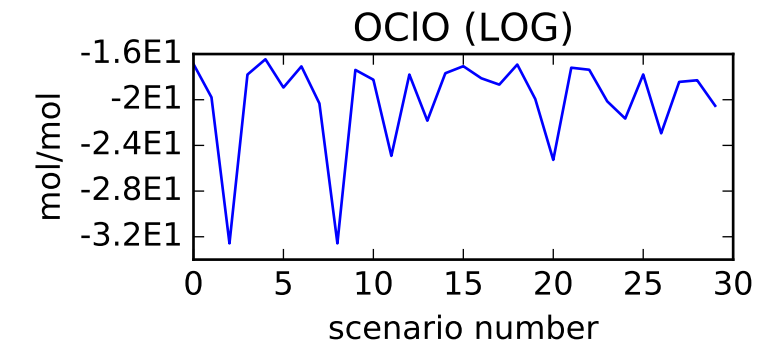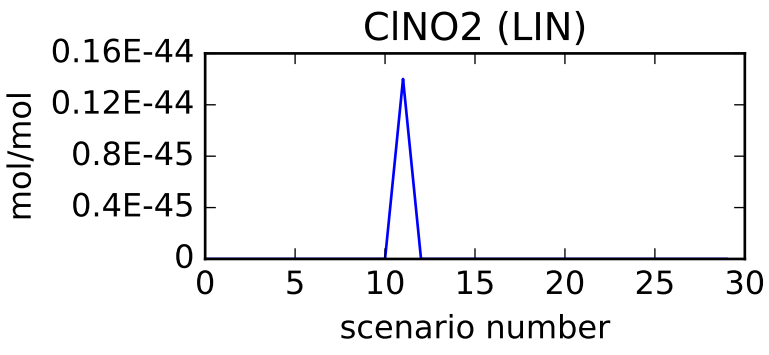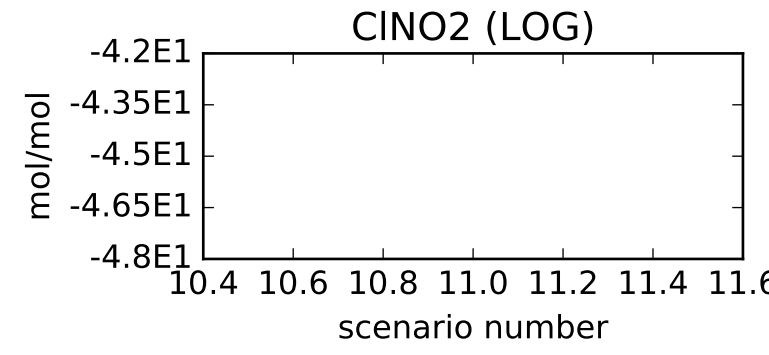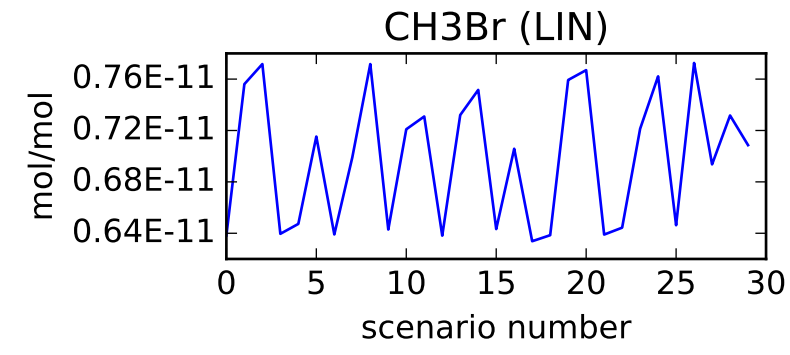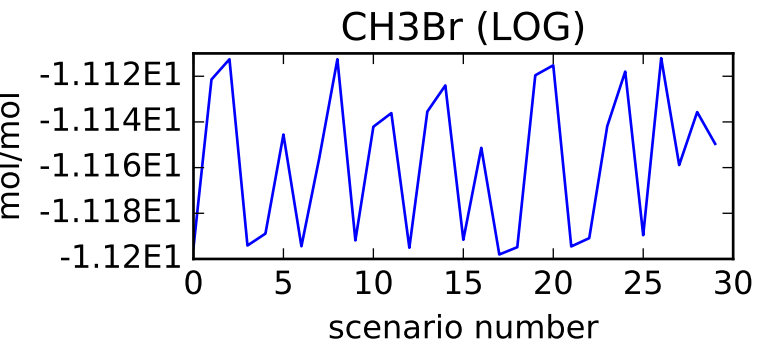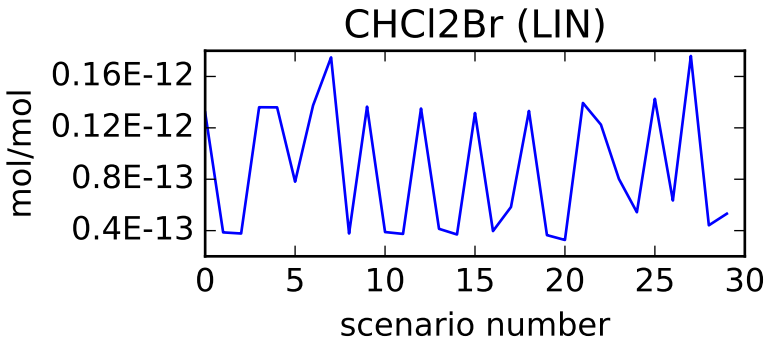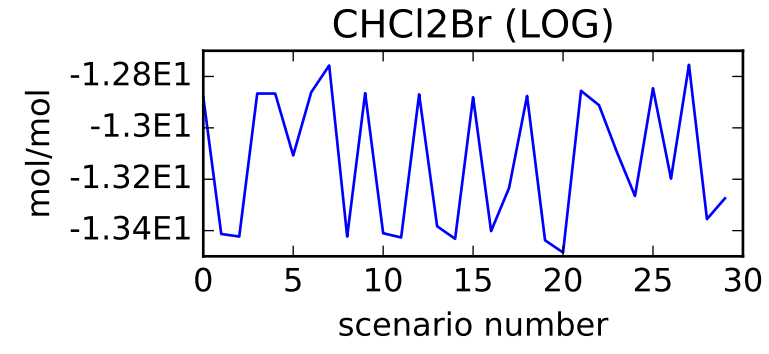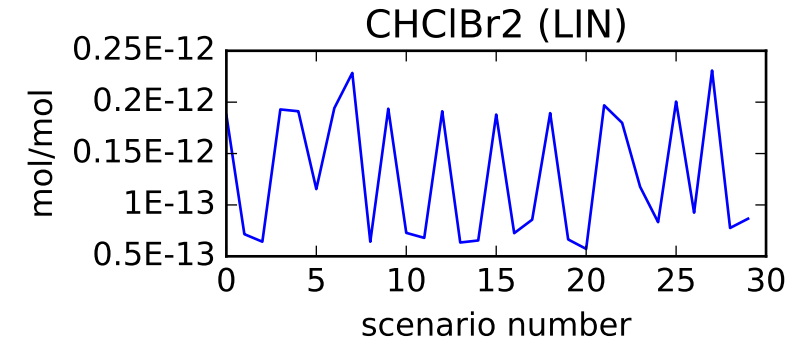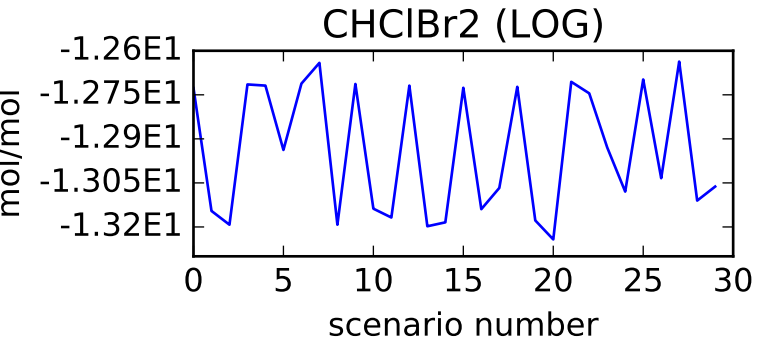

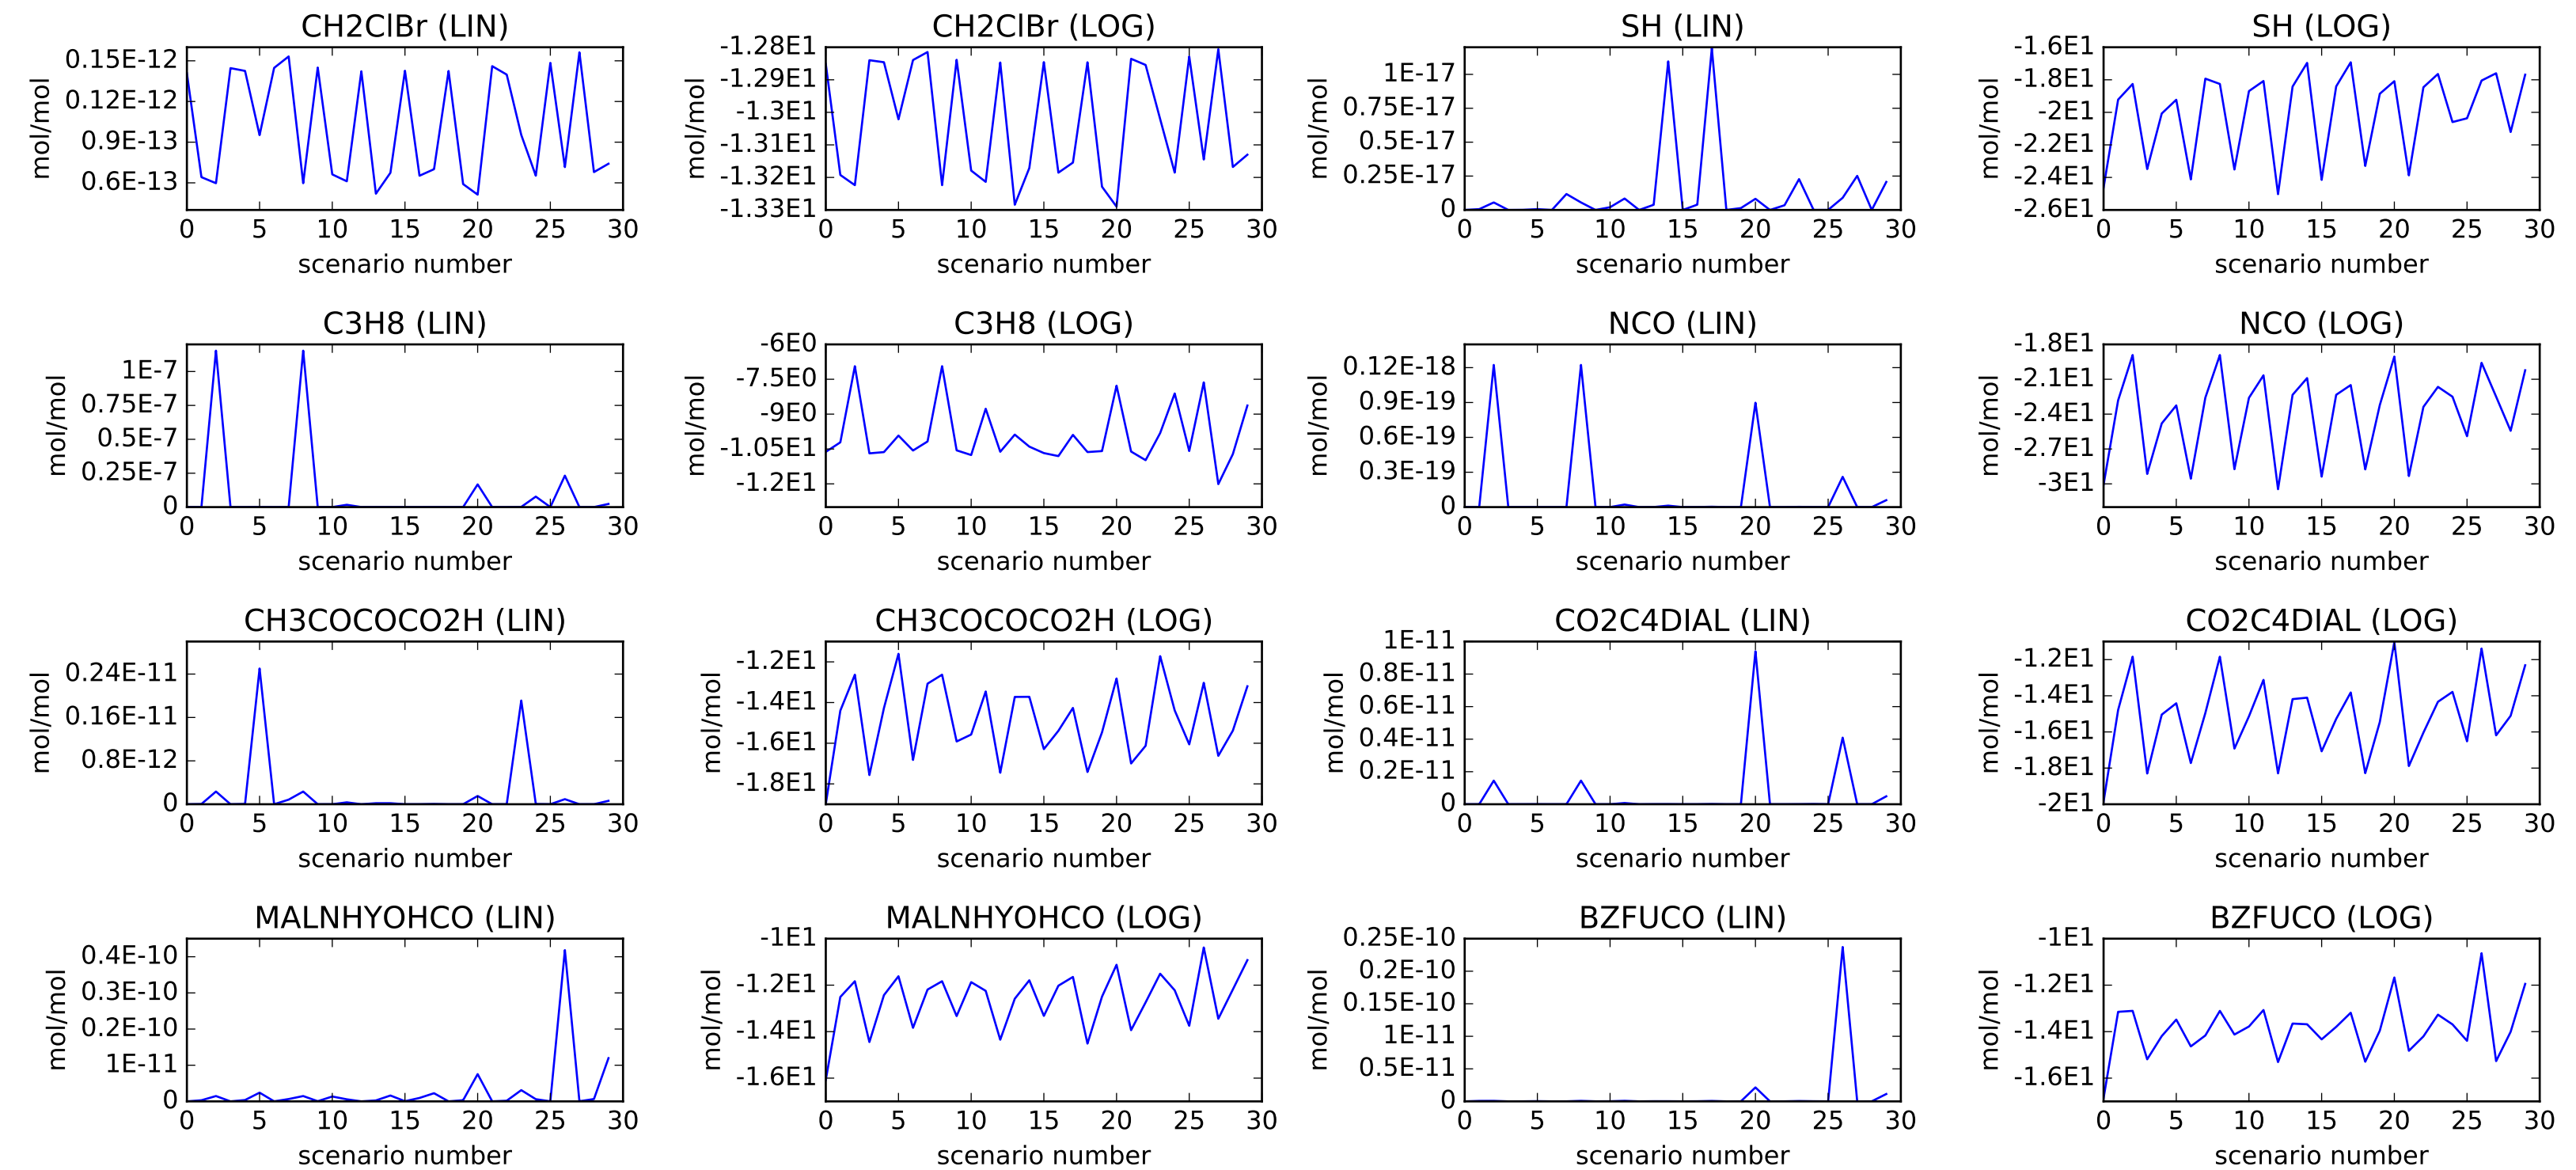



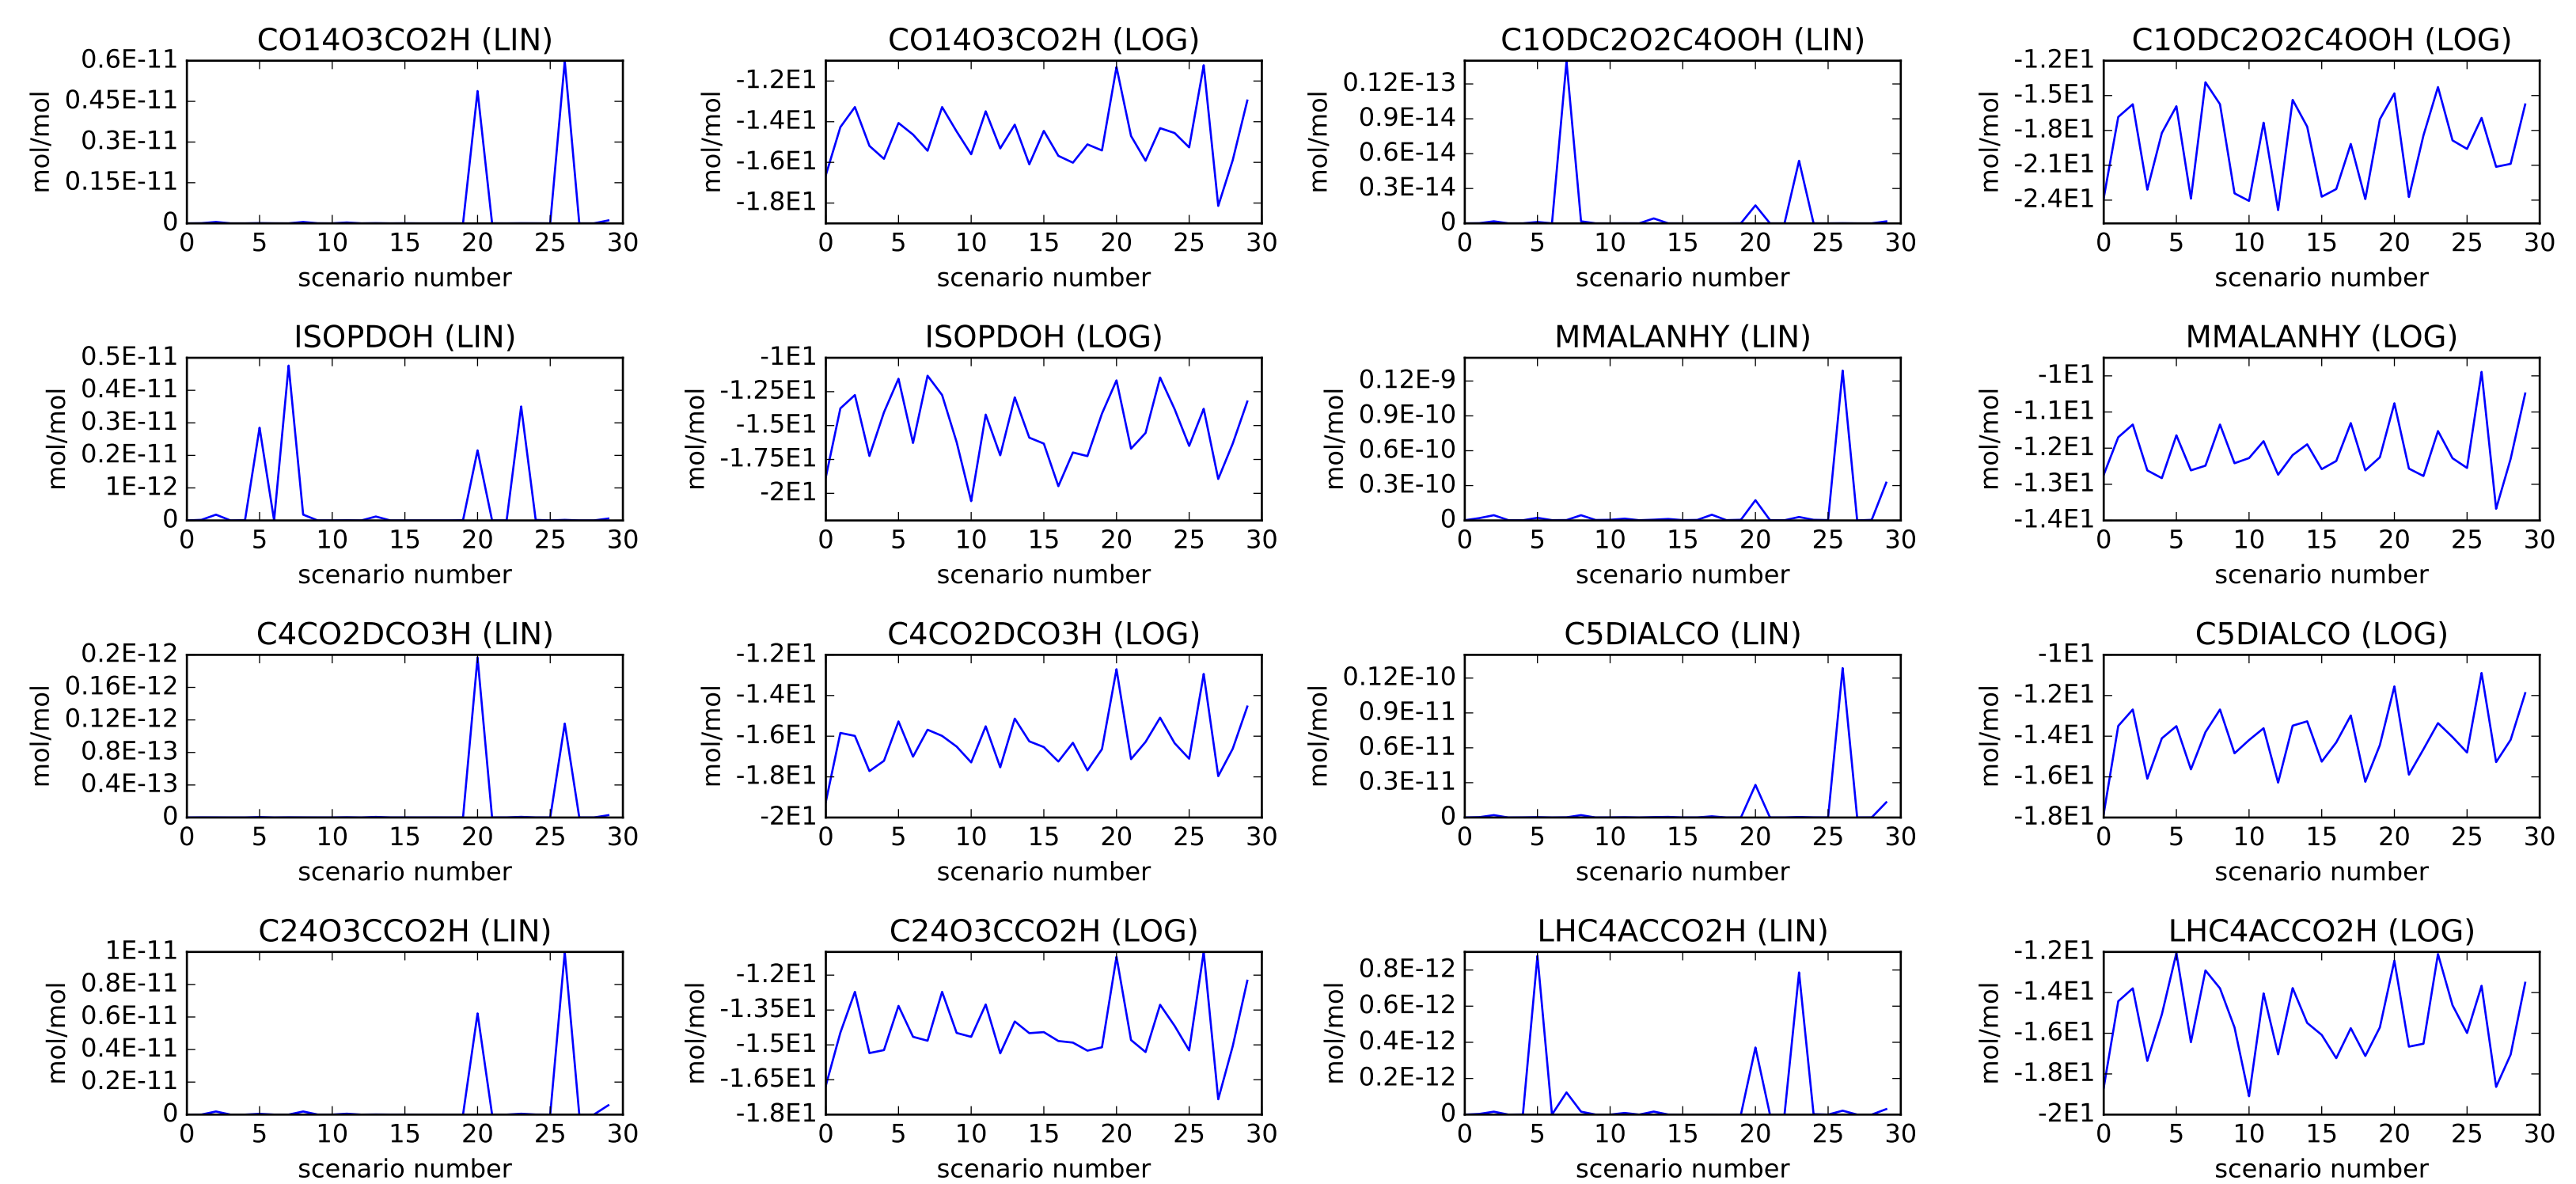

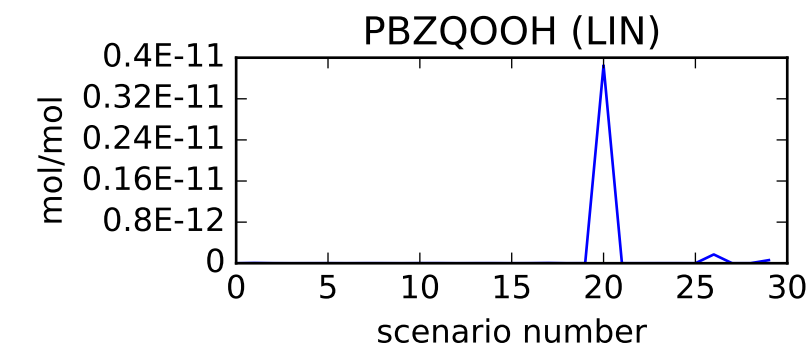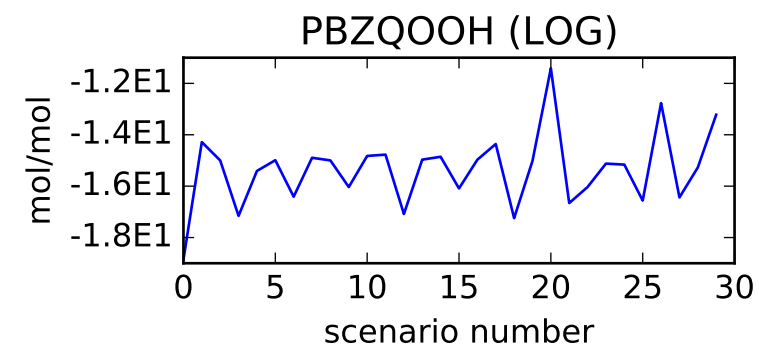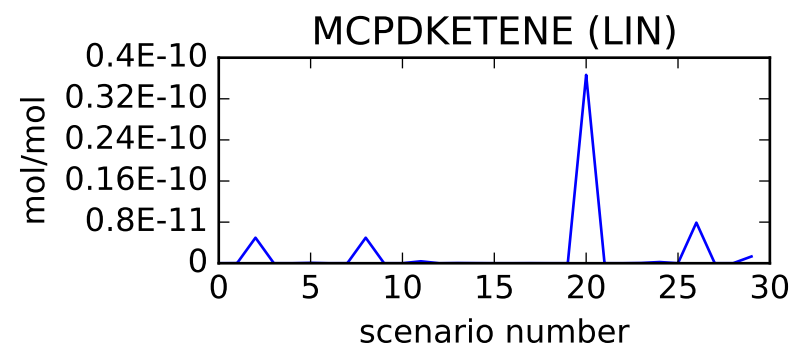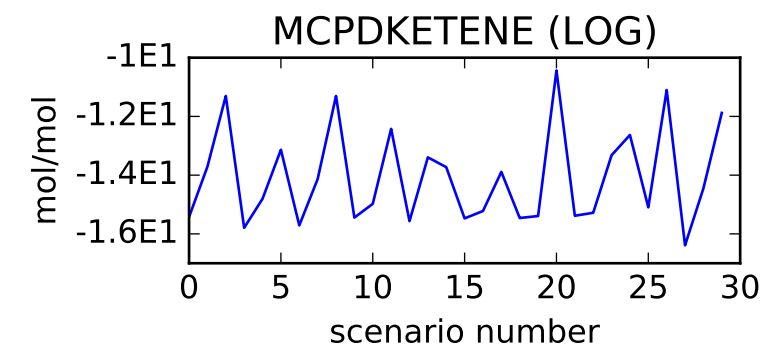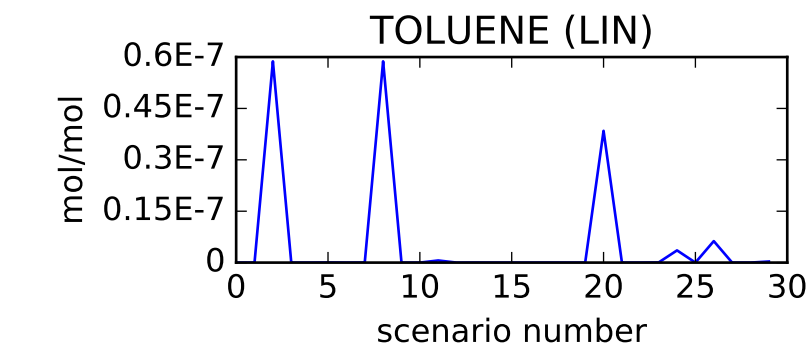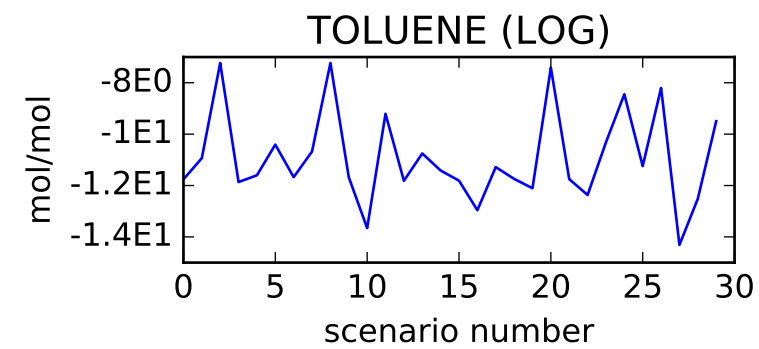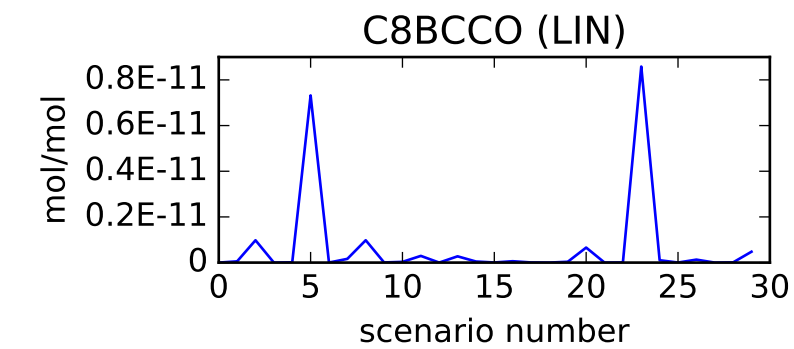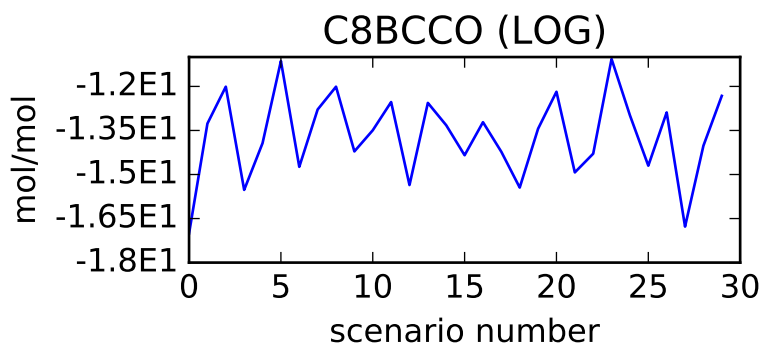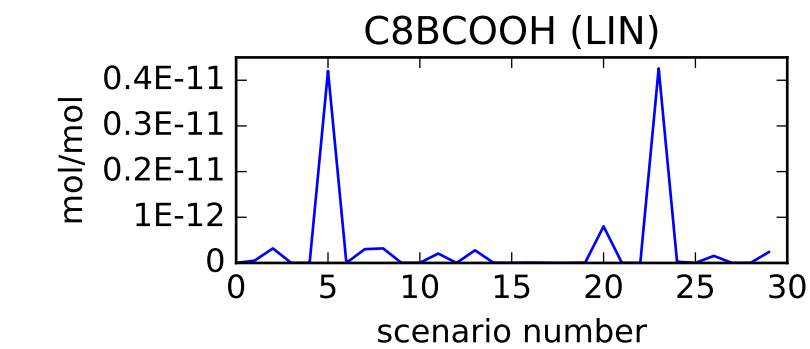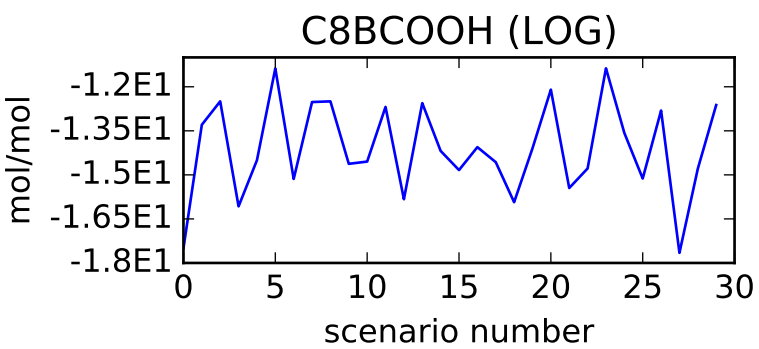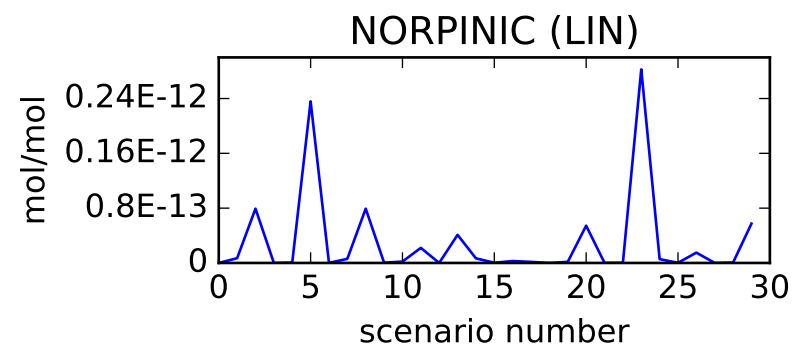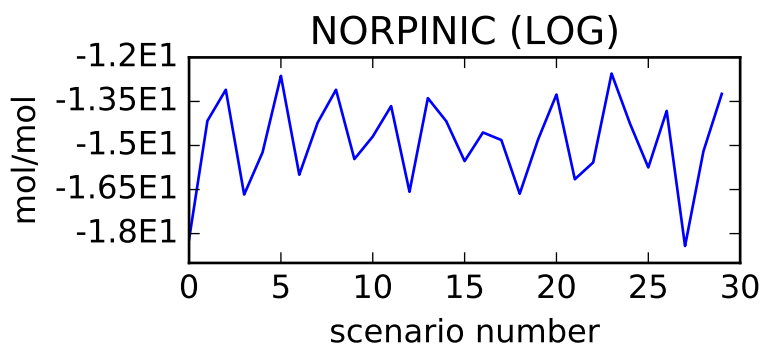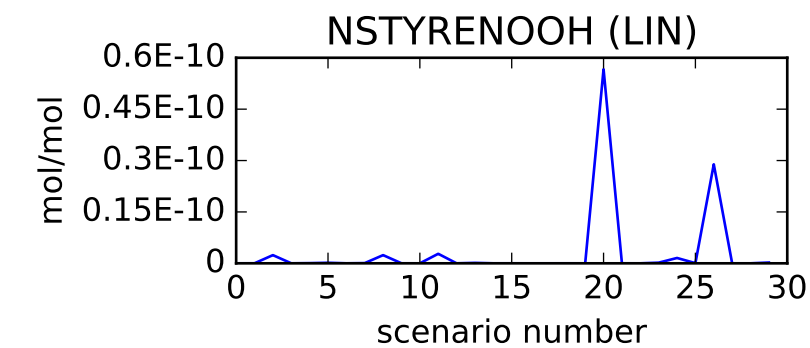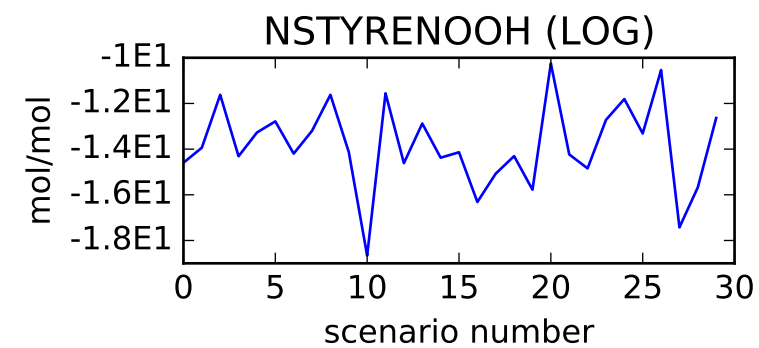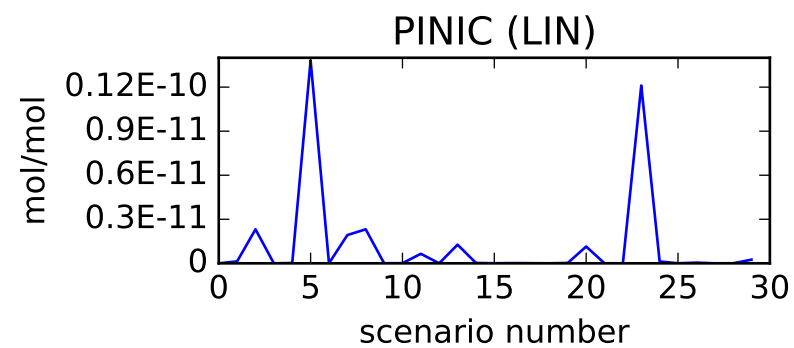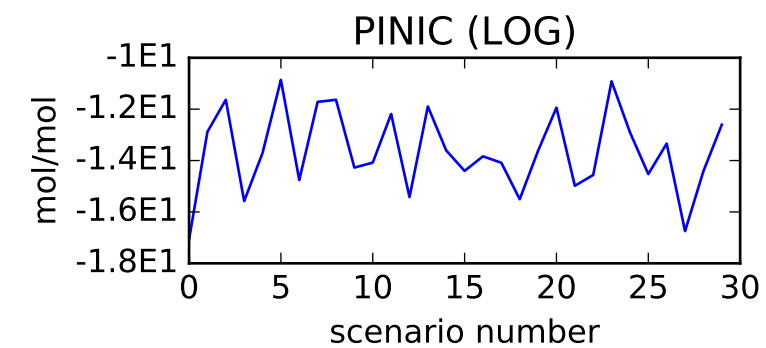



NC3H7NO3 (LIN)

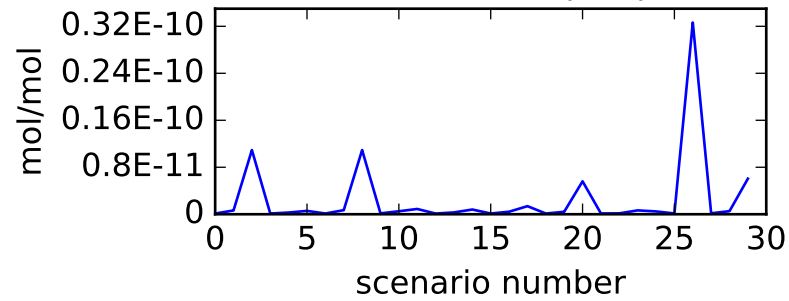

NC3H7NO3 (LOG)

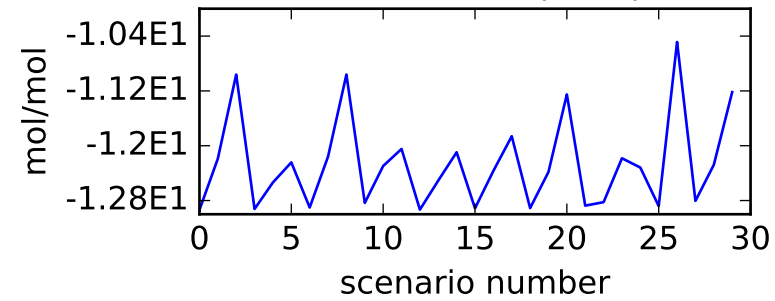

HOC2H4CO2H (LIN)

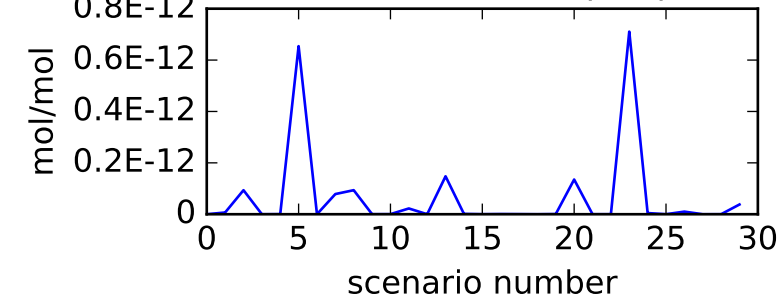

HOC2H4CO2H (LOG)

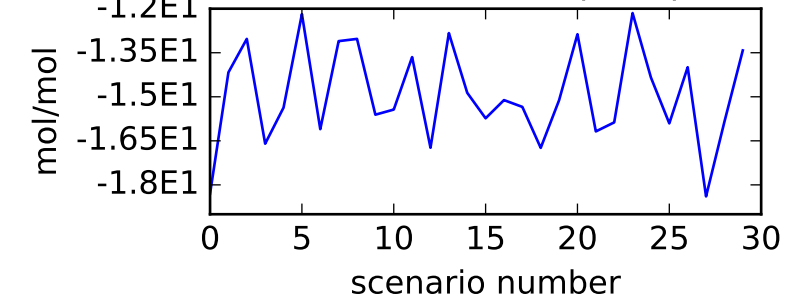

BUT2OLO (LIN)

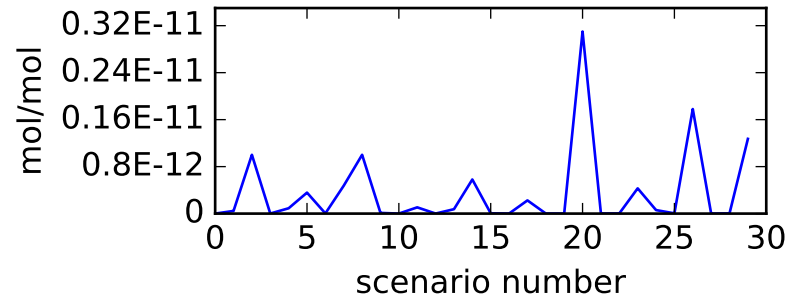

BUT2OLO (LOG)

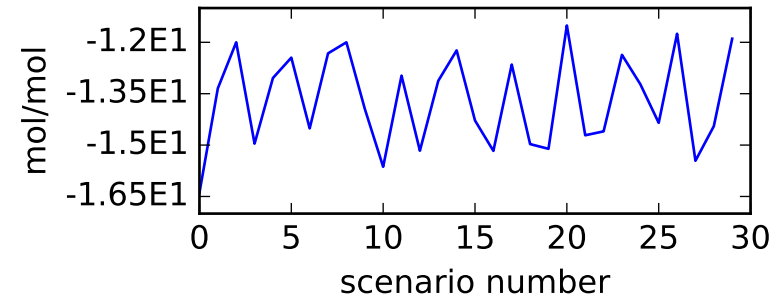

C513CO (LIN)

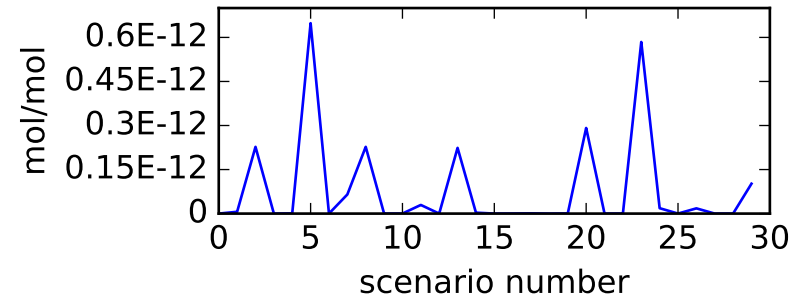

C513CO (LOG)

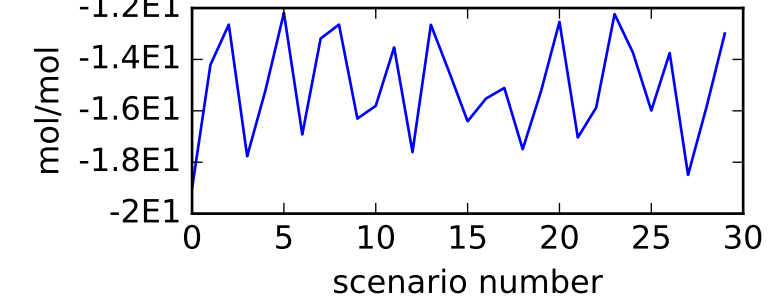

MBOCOCO (LIN)

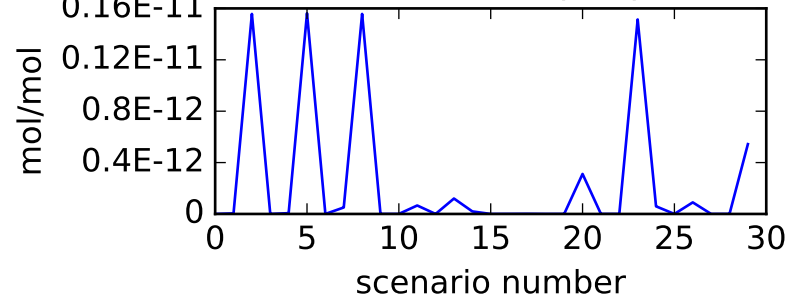

MBOCOCO (LOG)

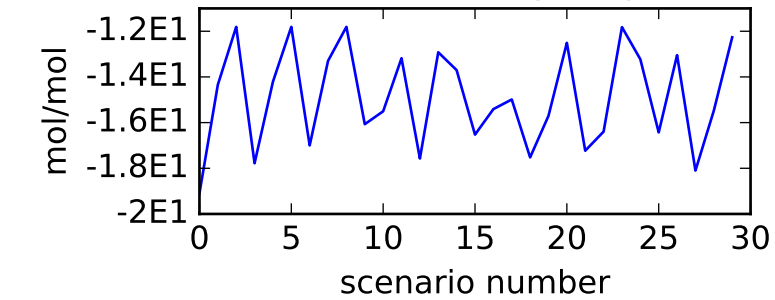

ISOPAB (LIN)

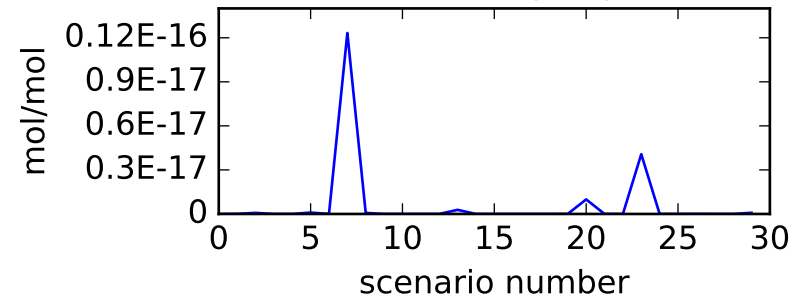

ISOPAB (LOG)

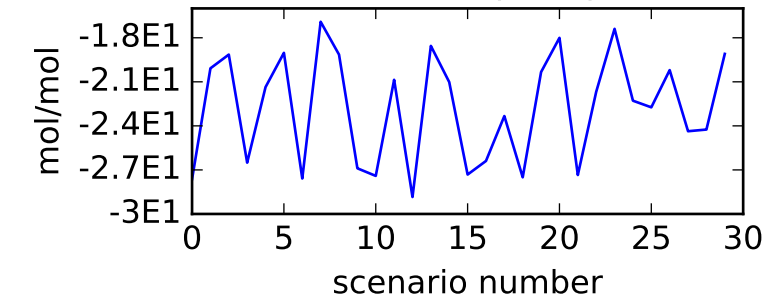

ISOPCD (LIN)

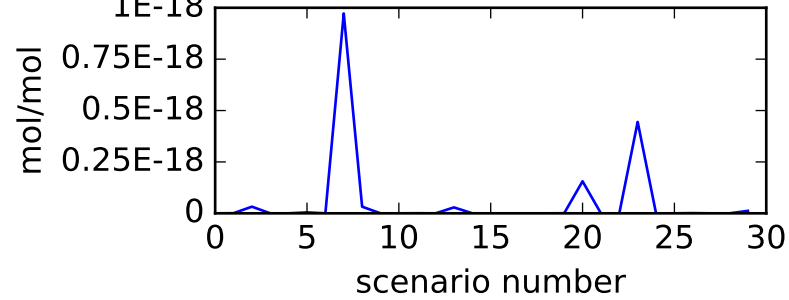

ISOPCD (LOG)

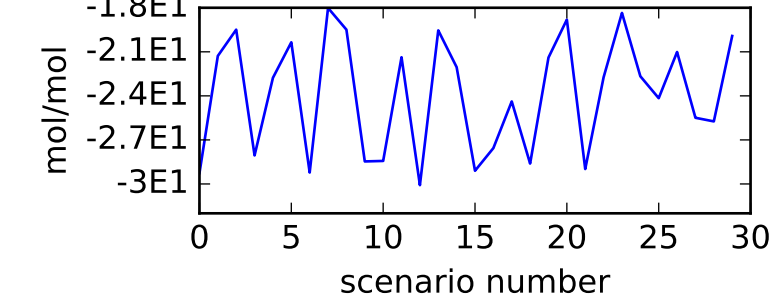

C4MCONO3OH (LIN)

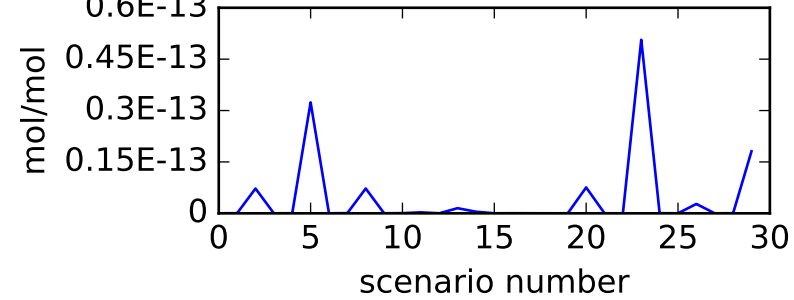

C4MCONO3OH (LOG)

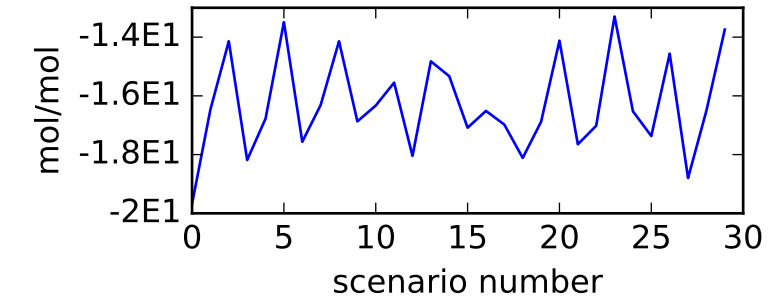

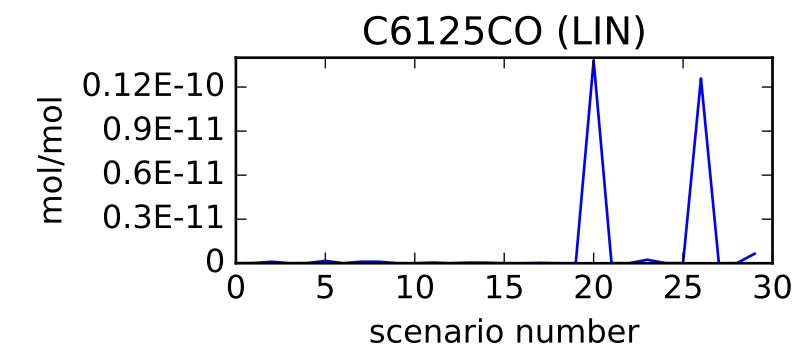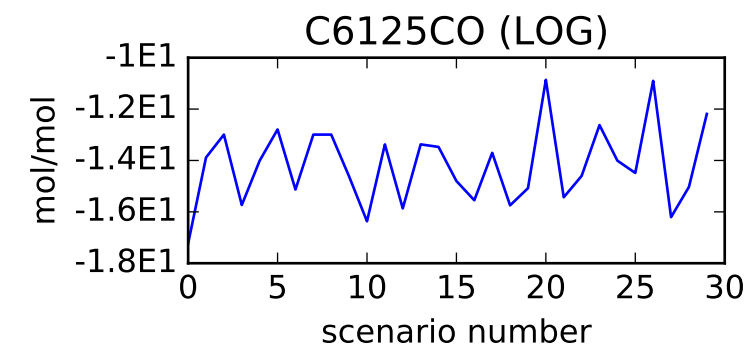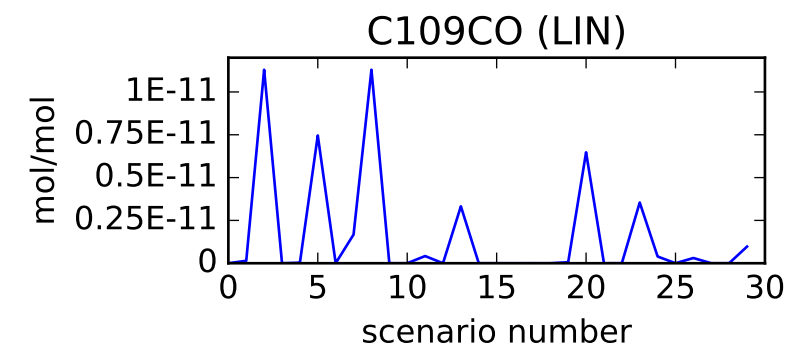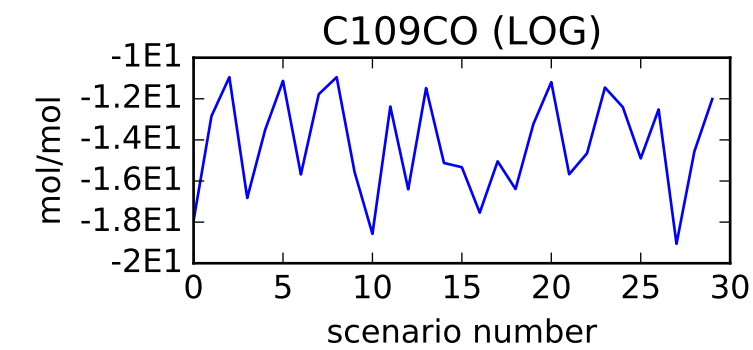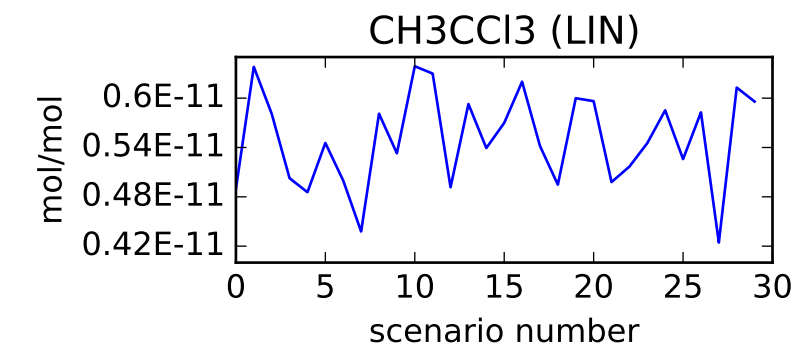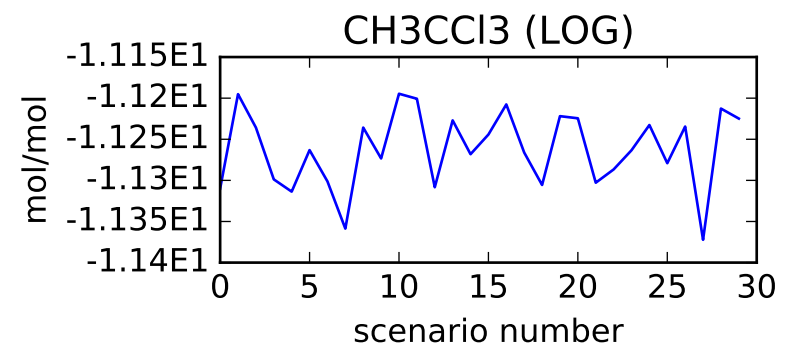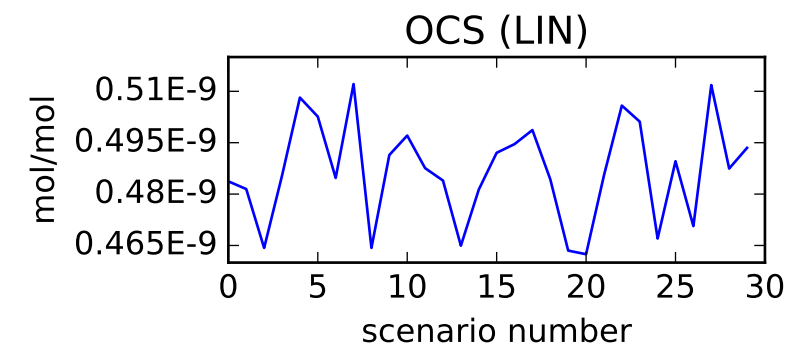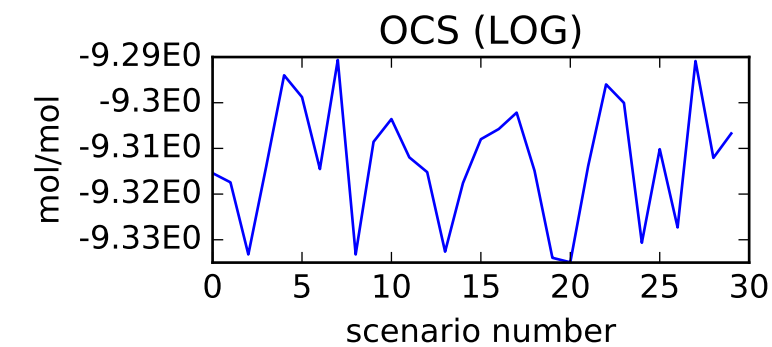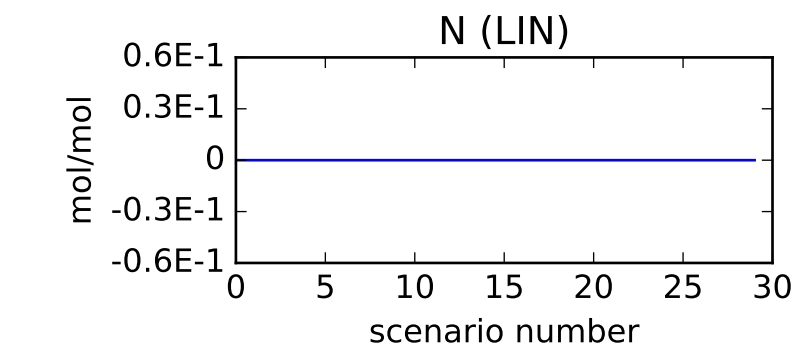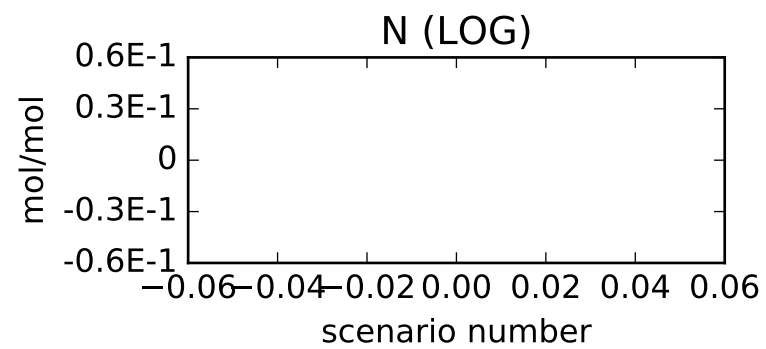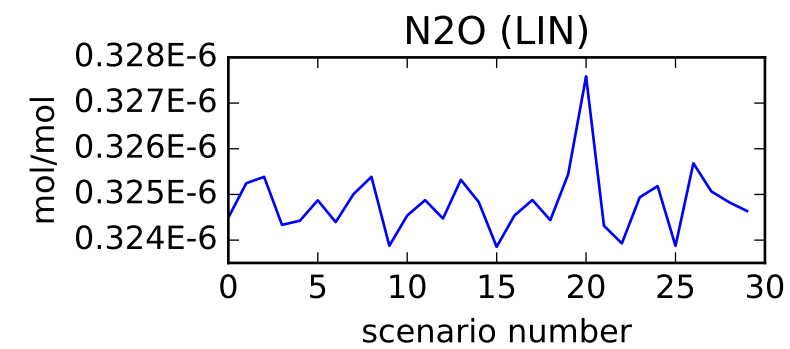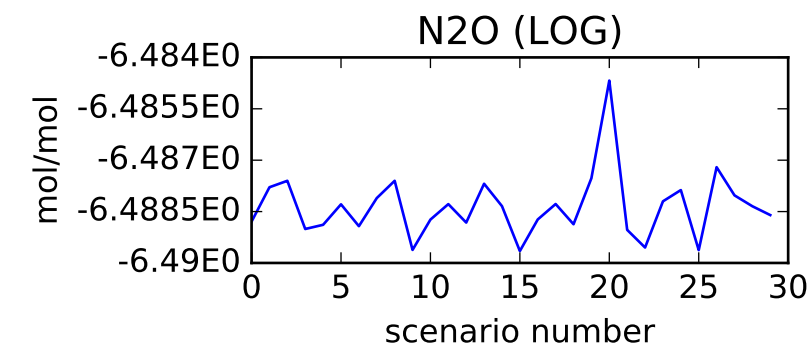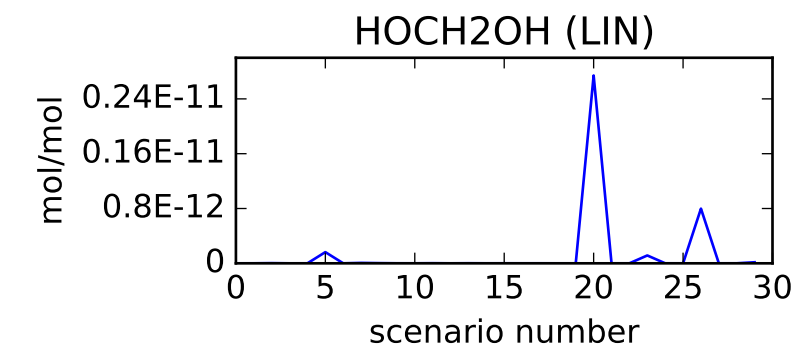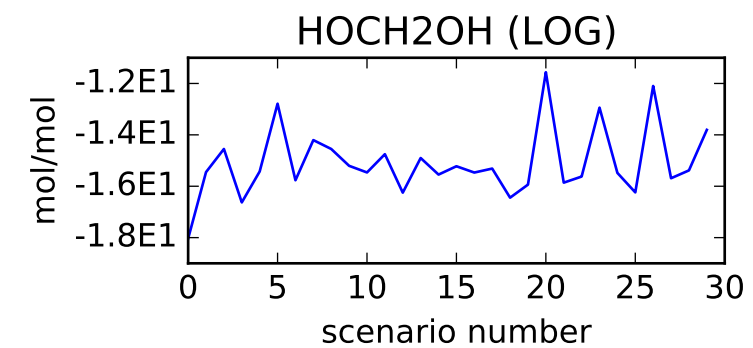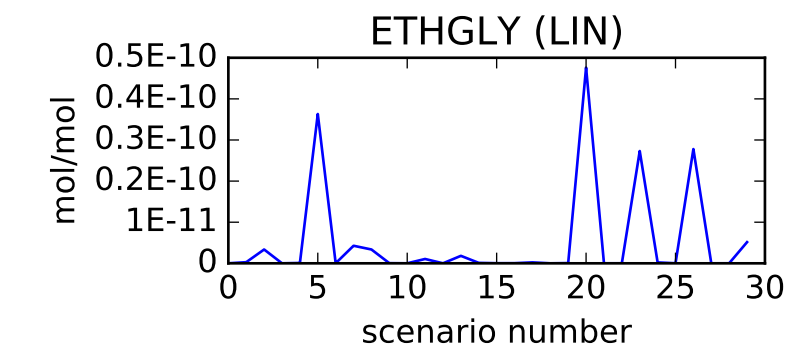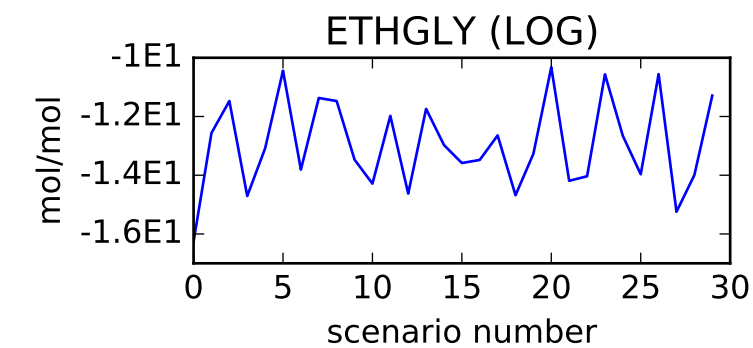

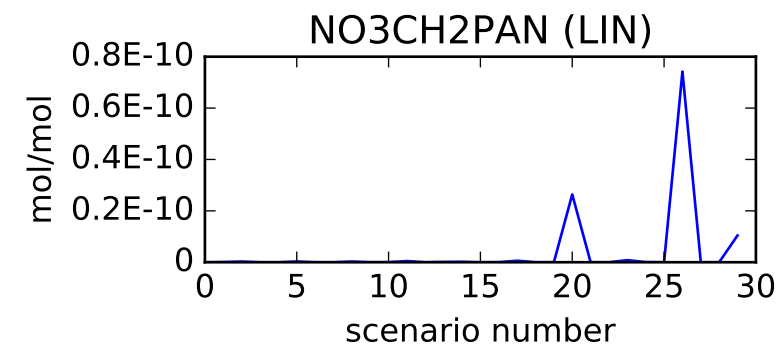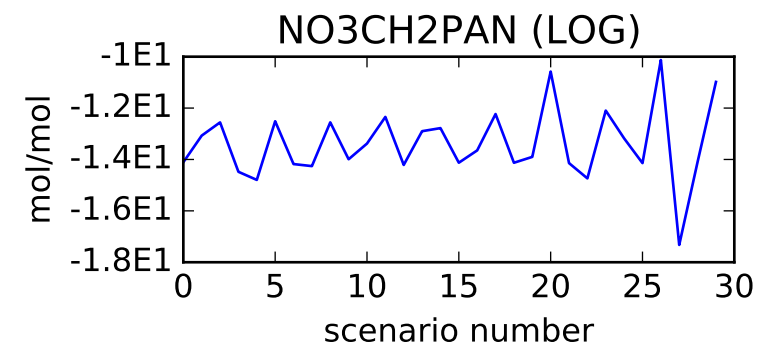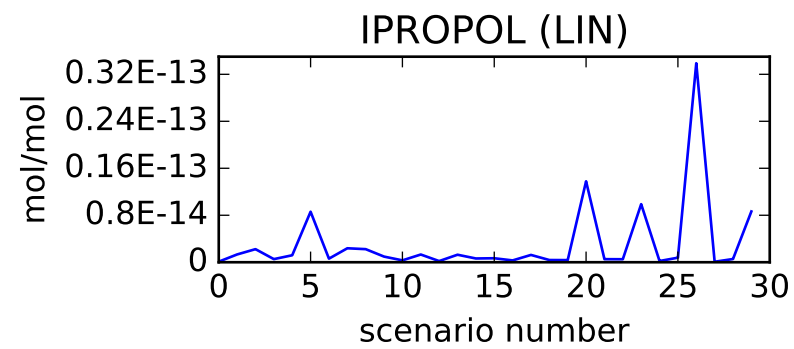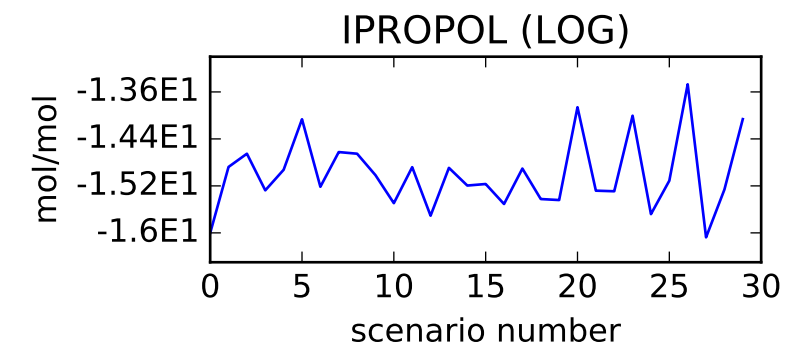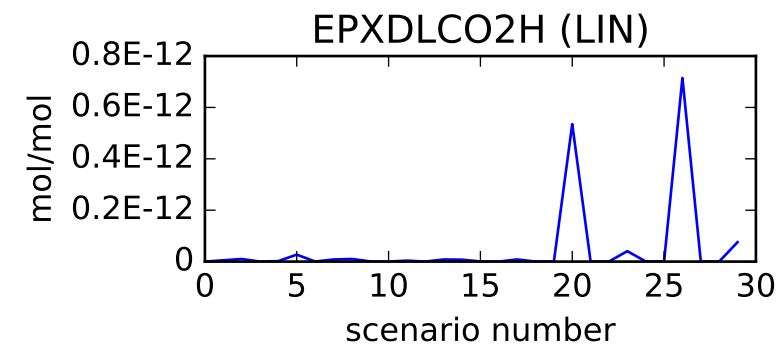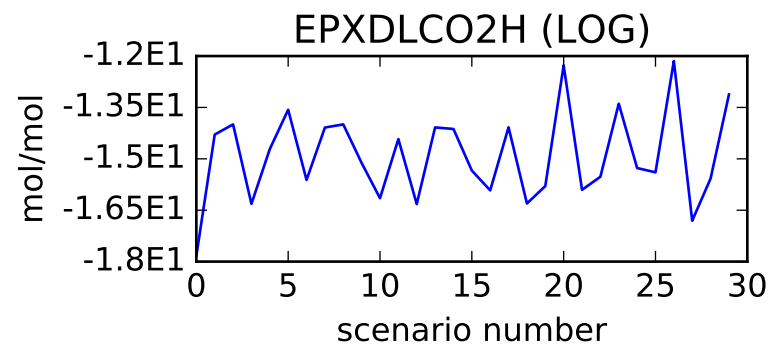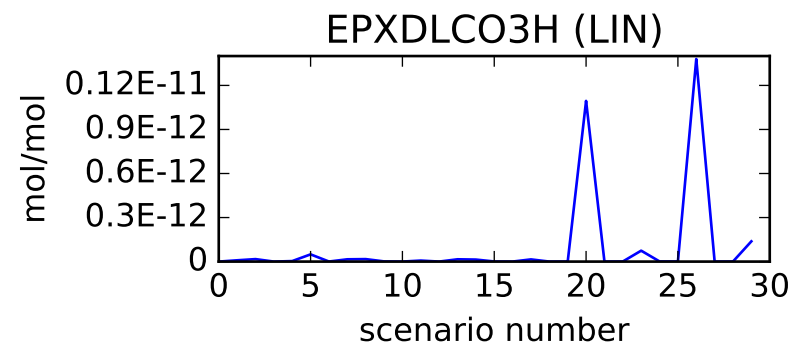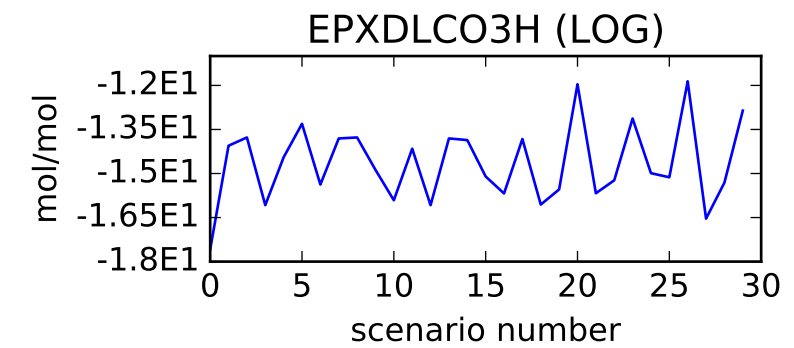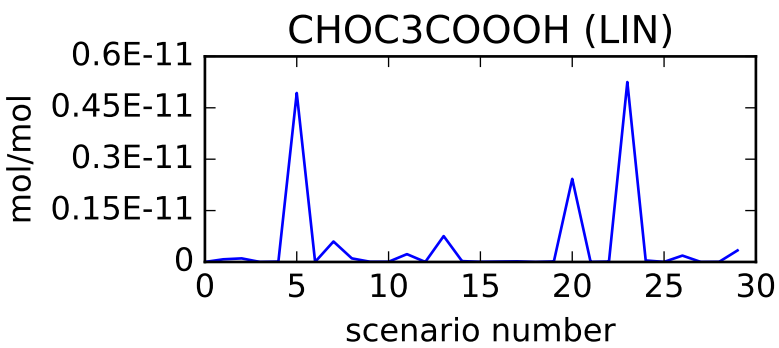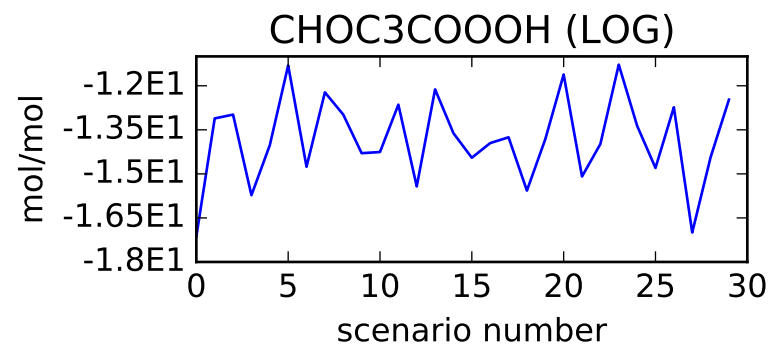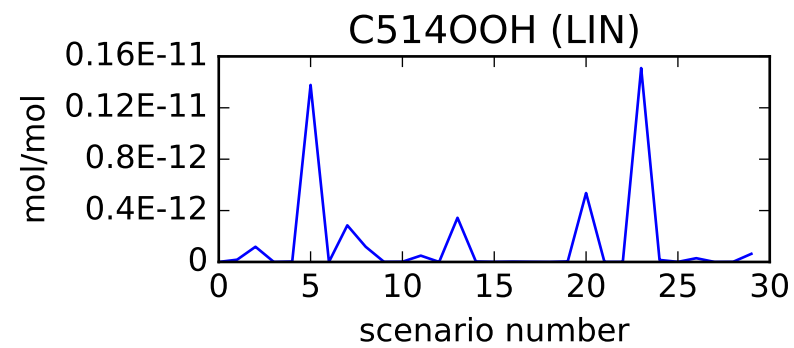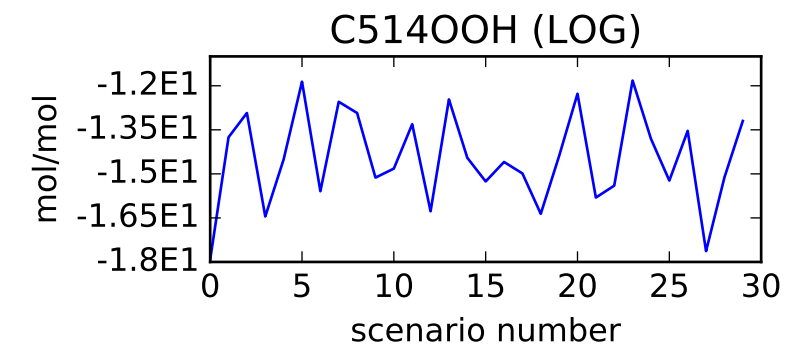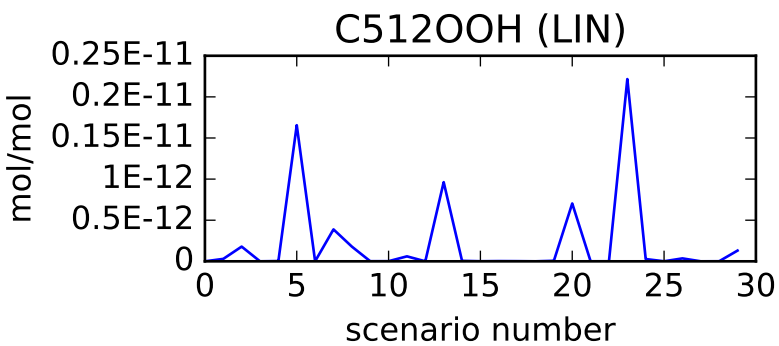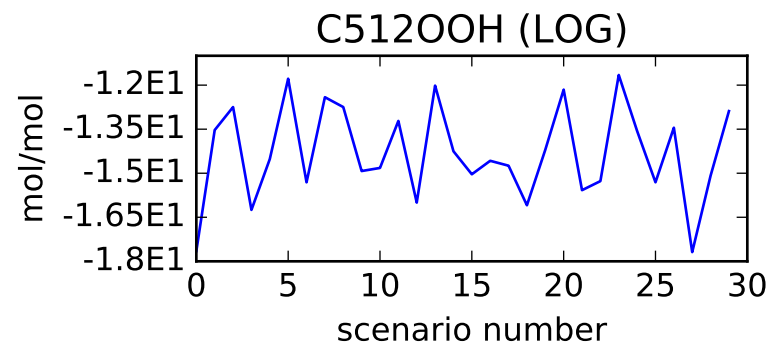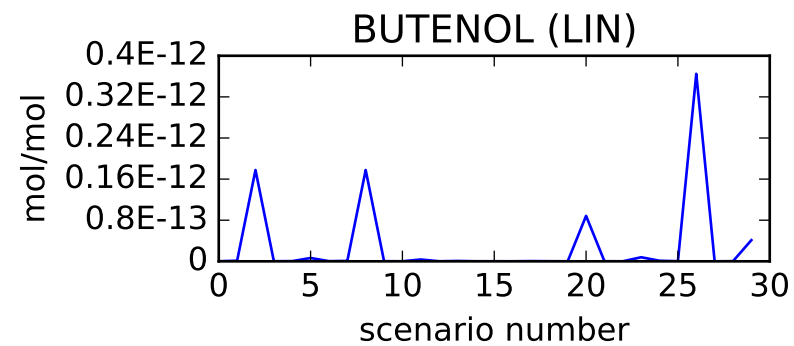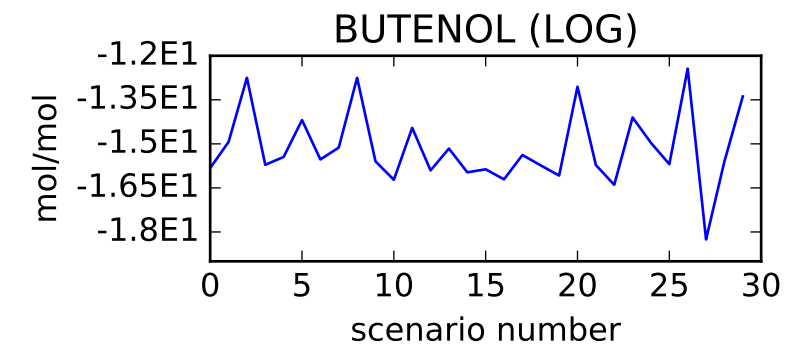

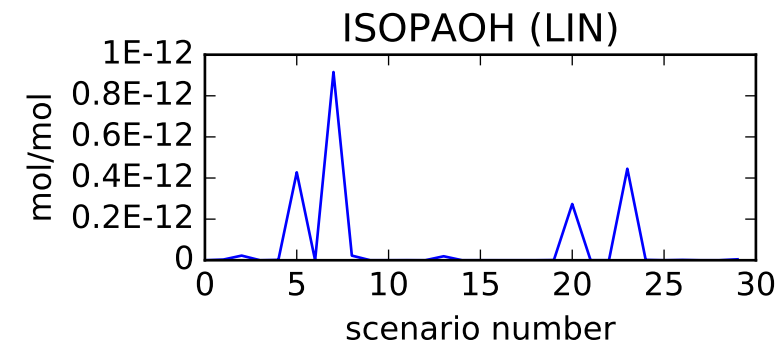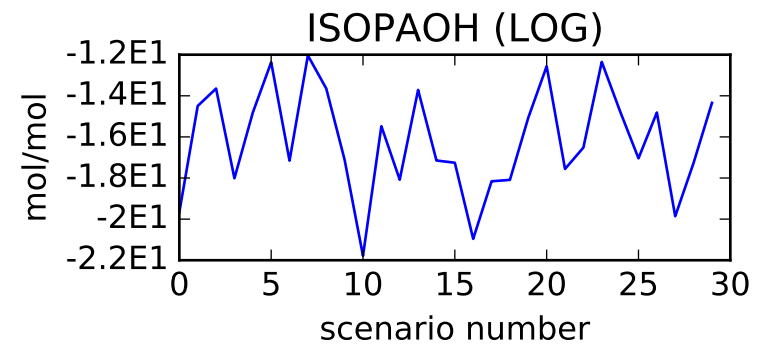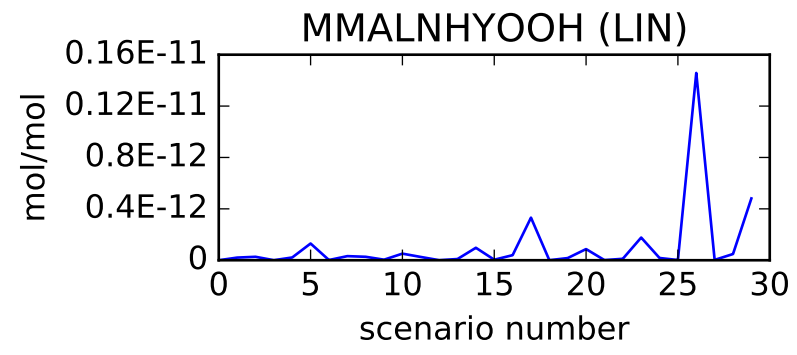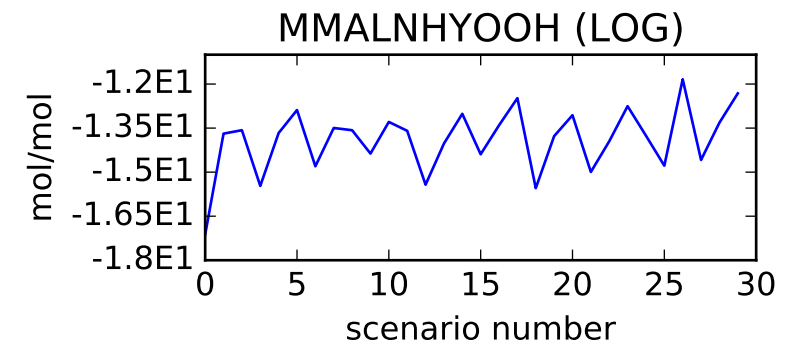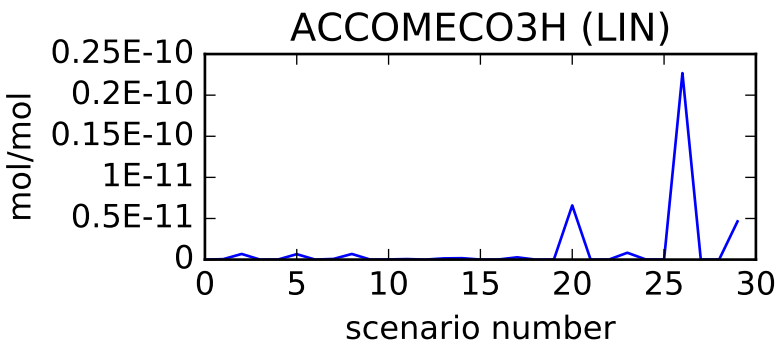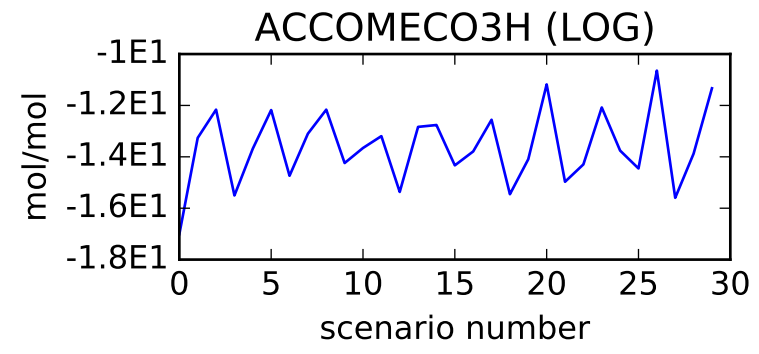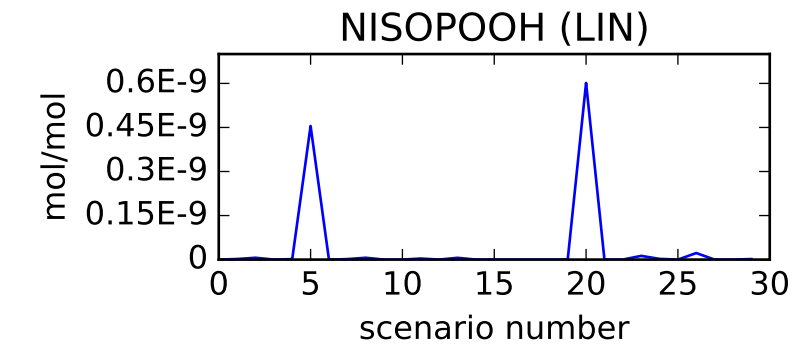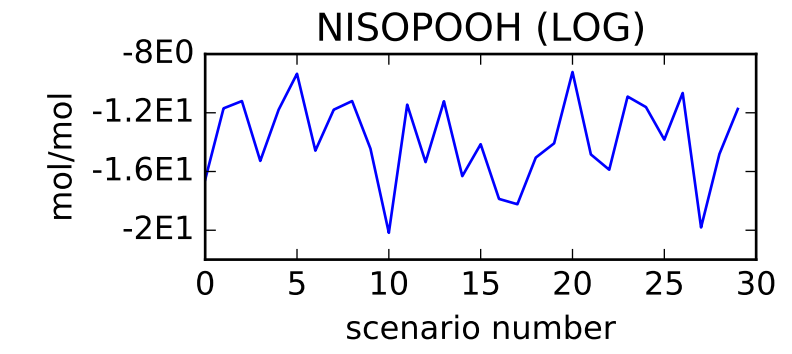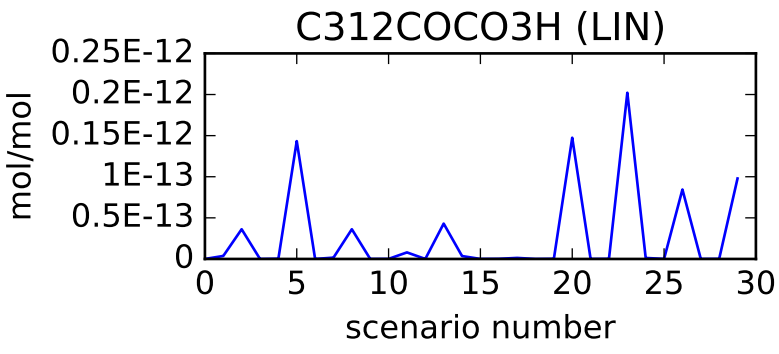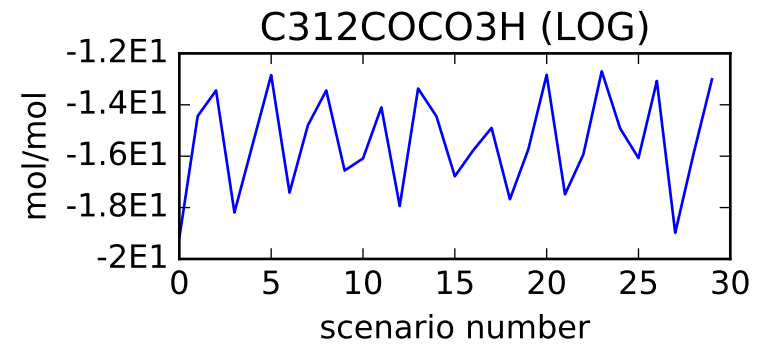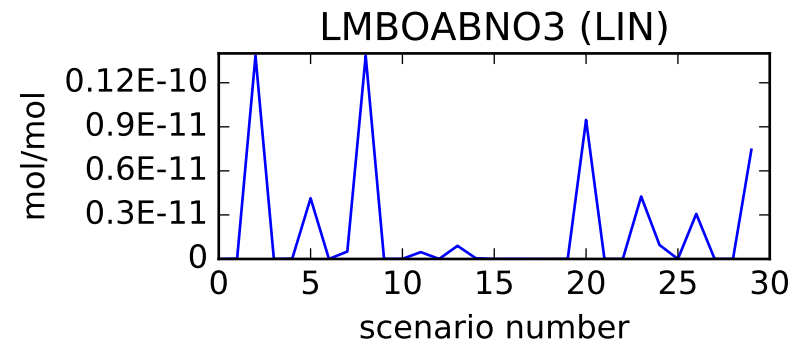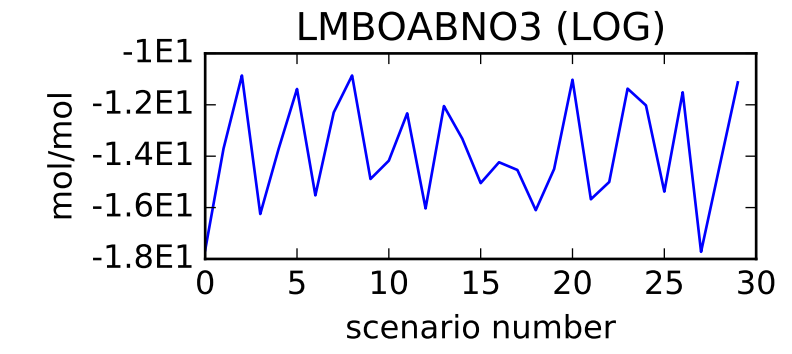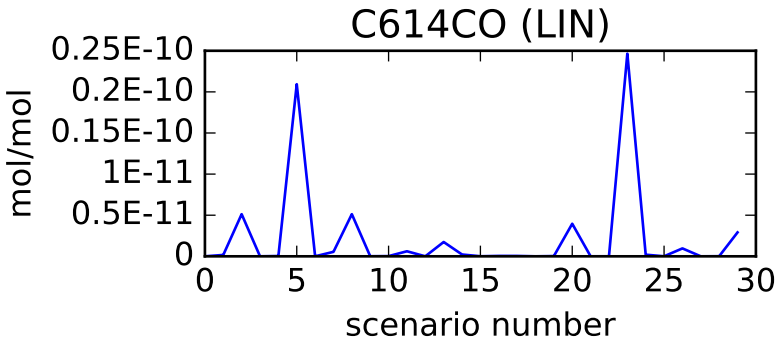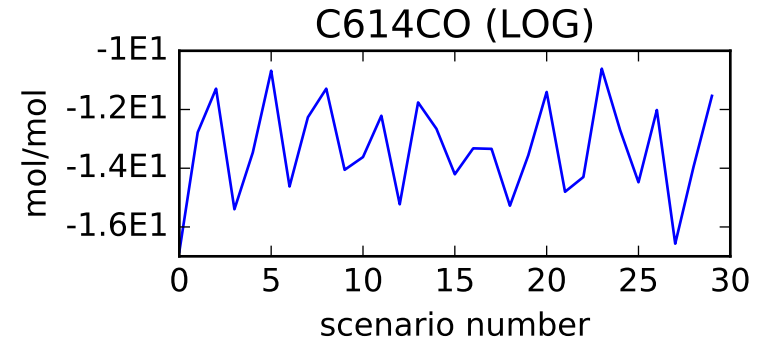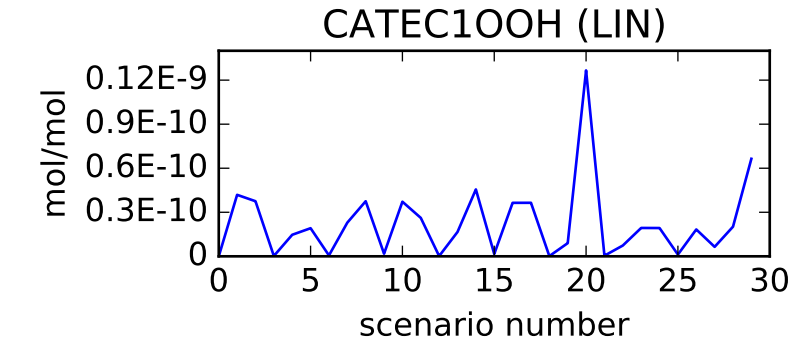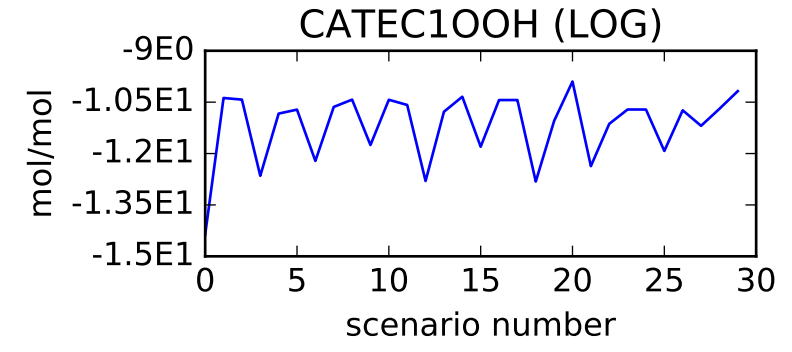

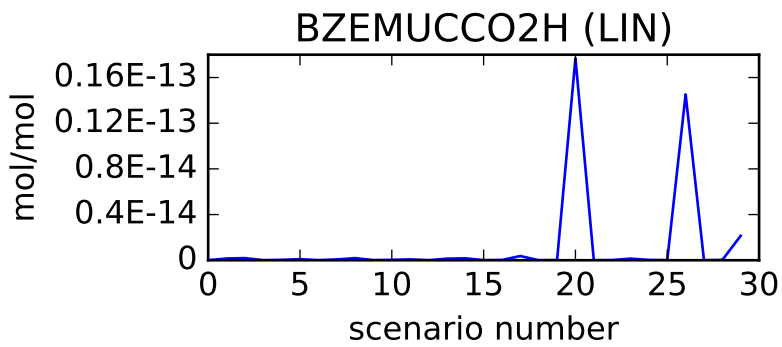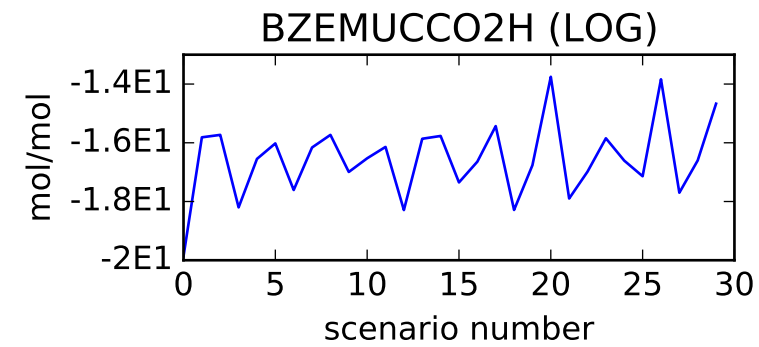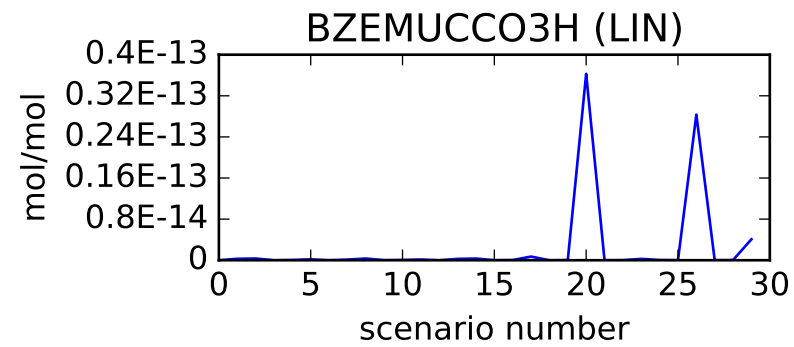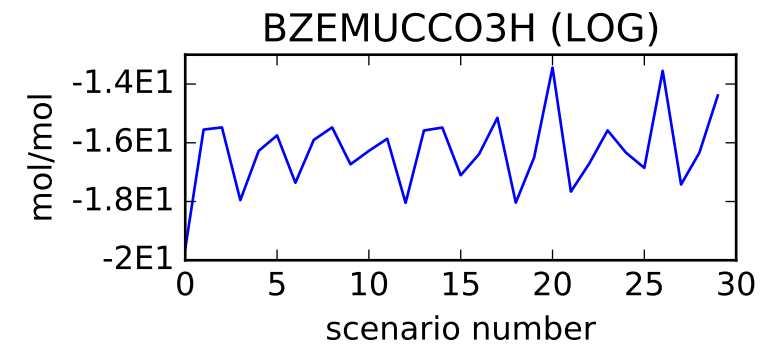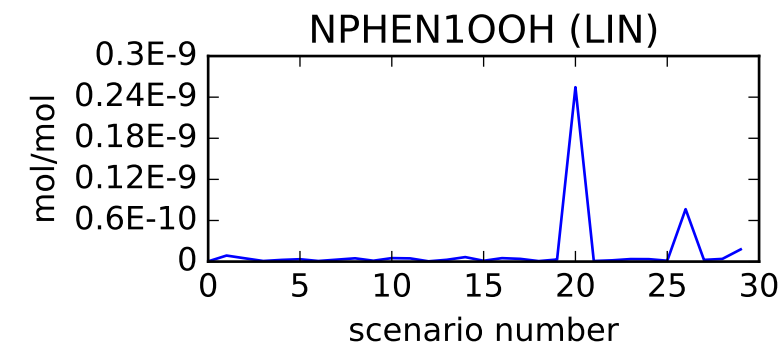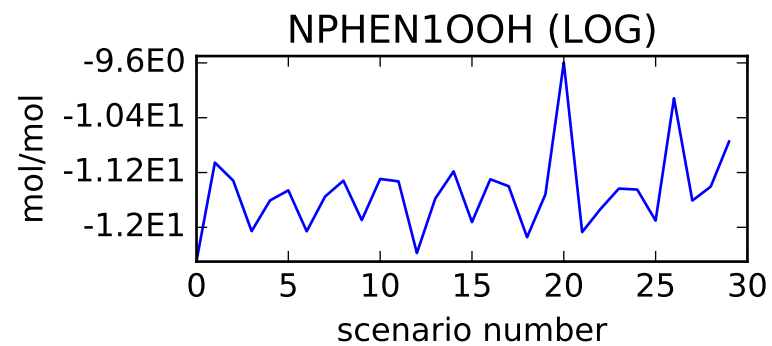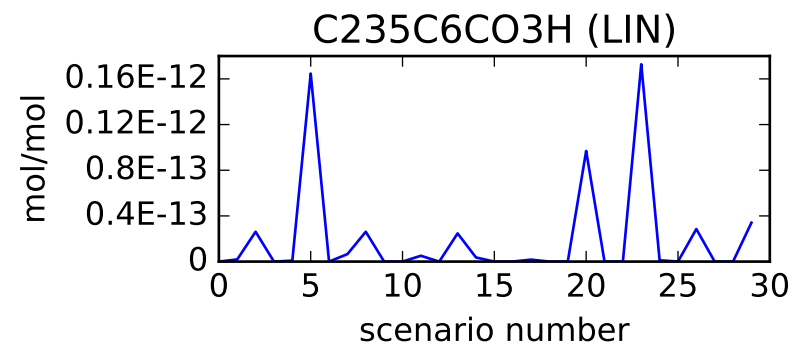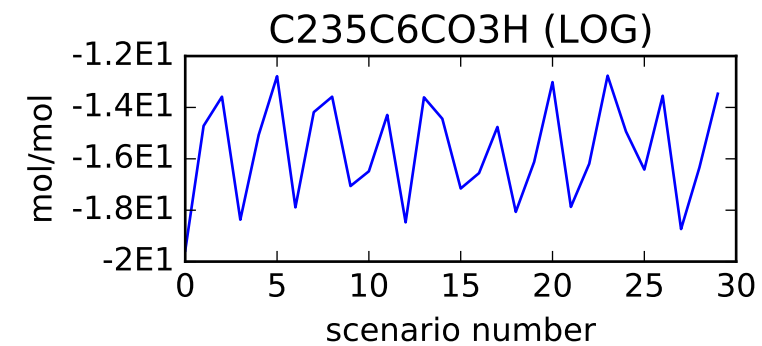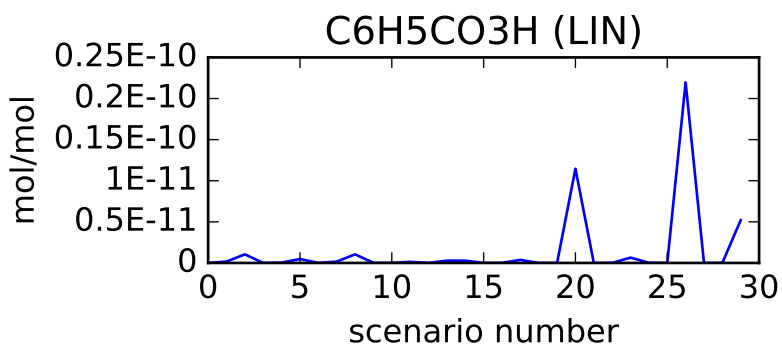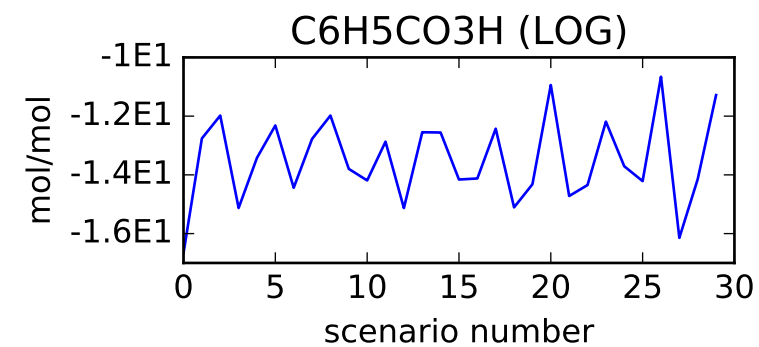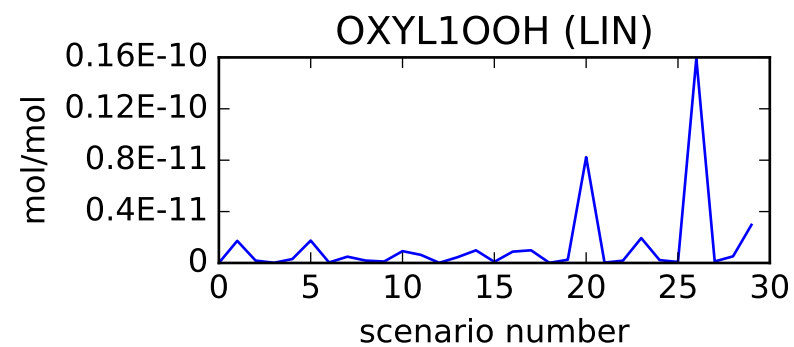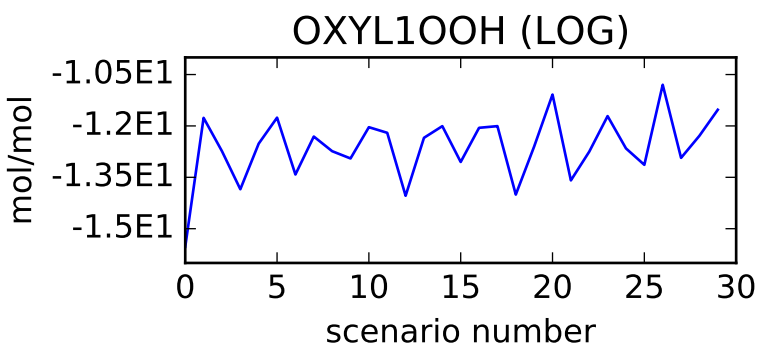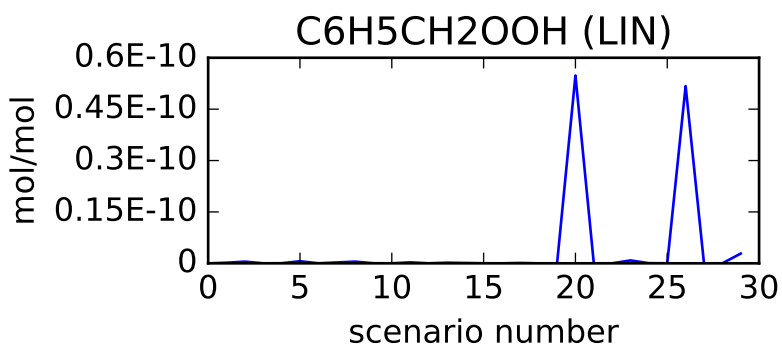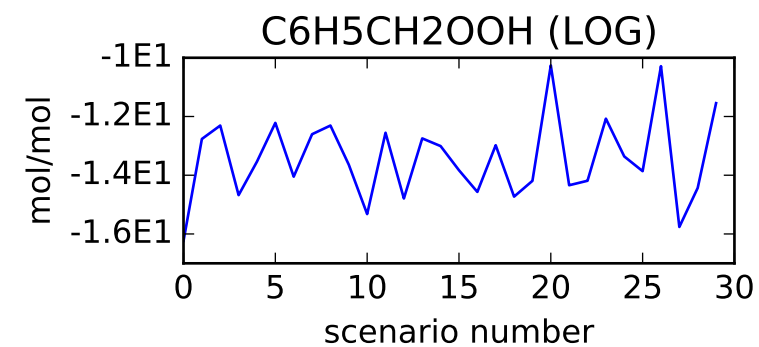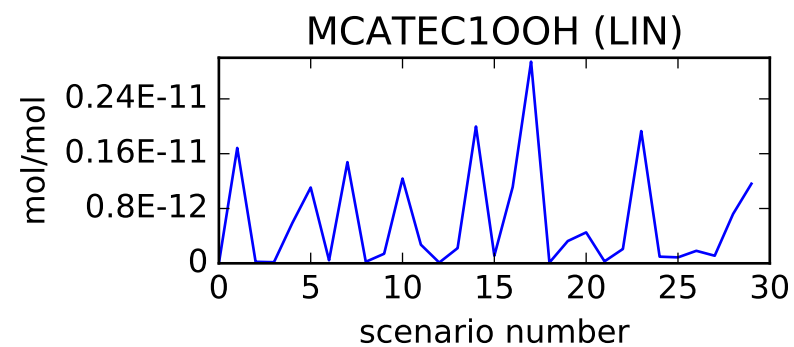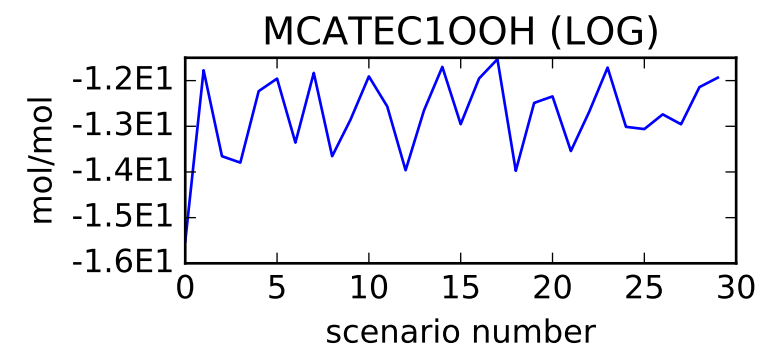

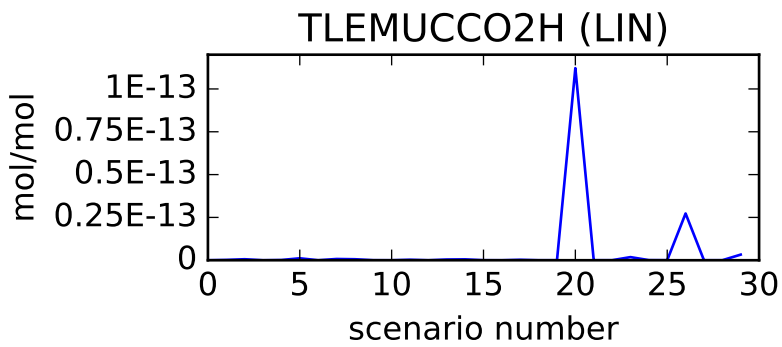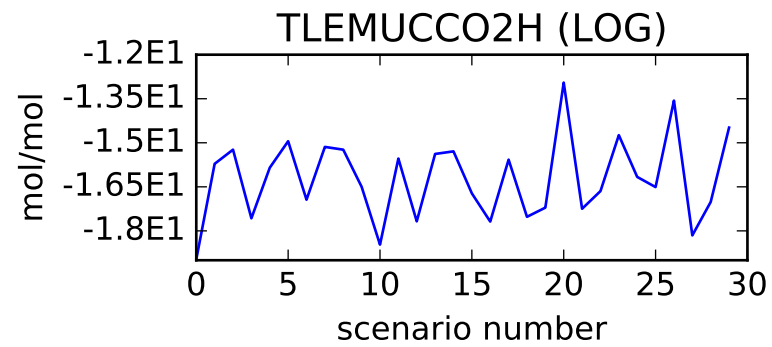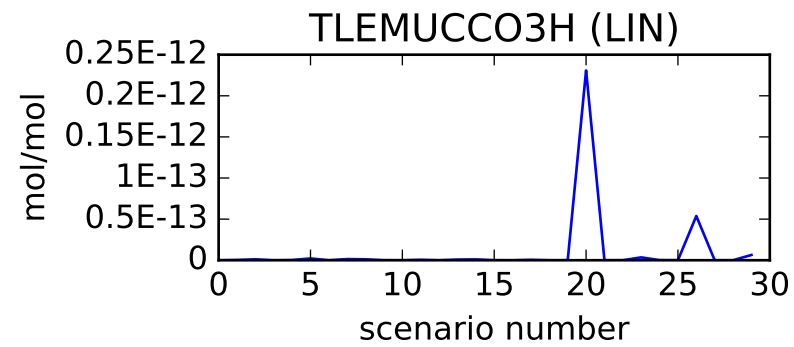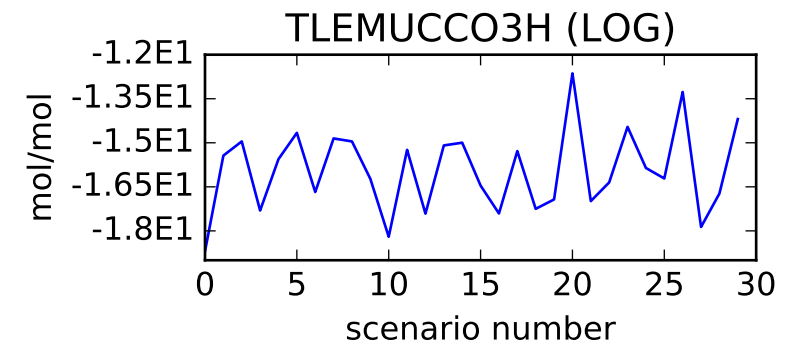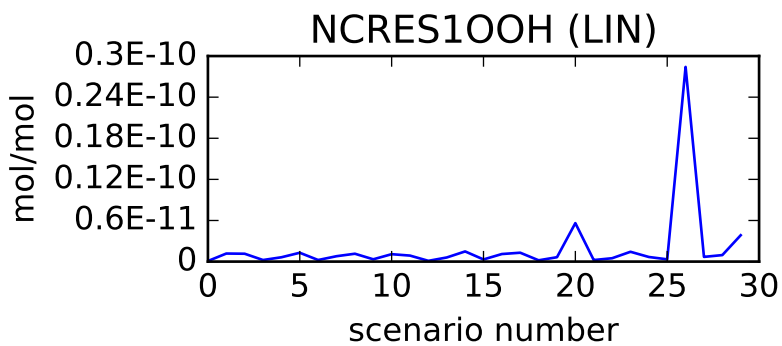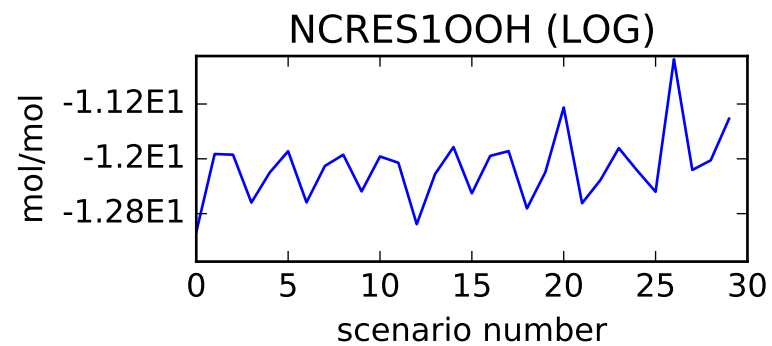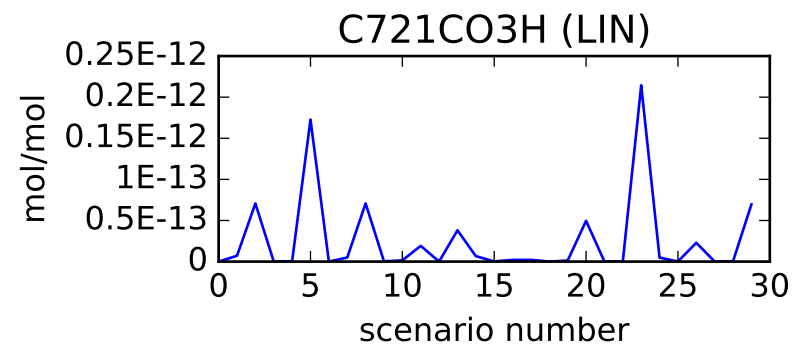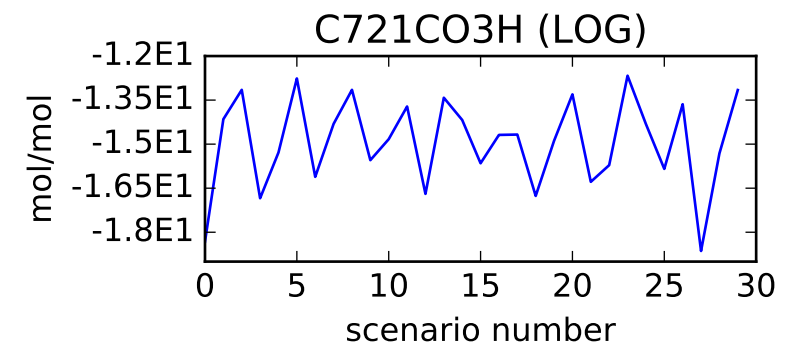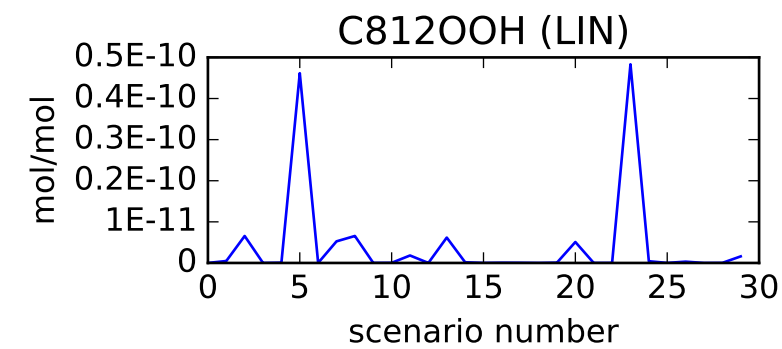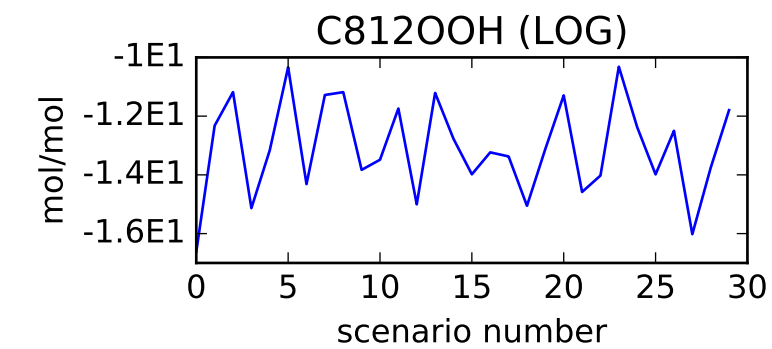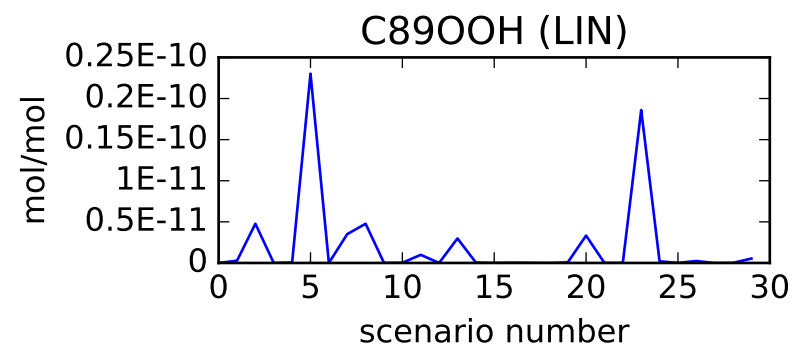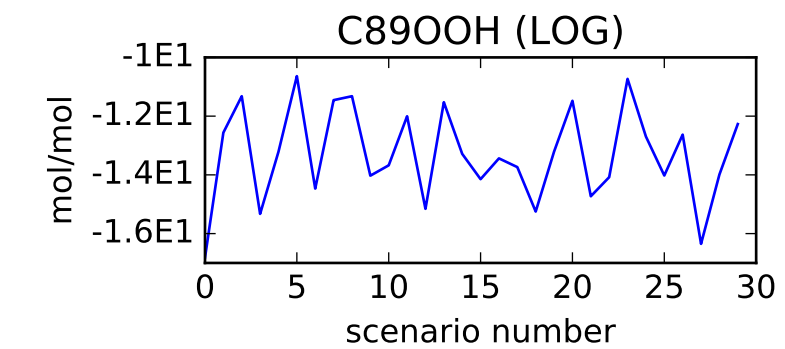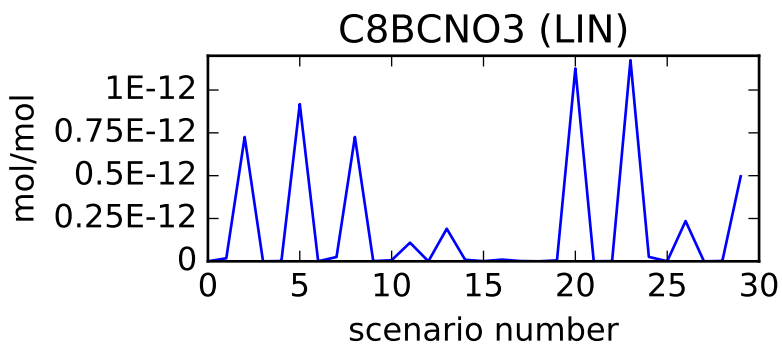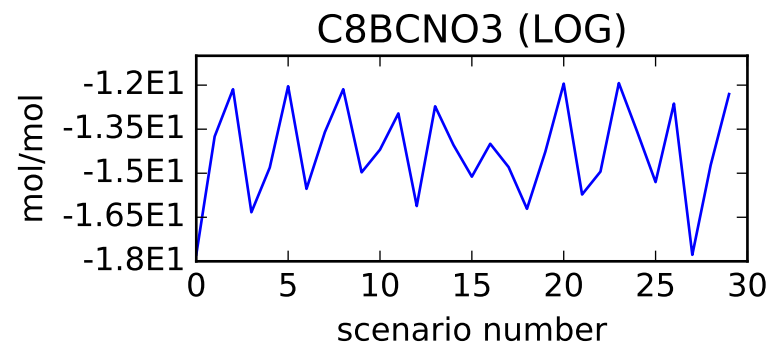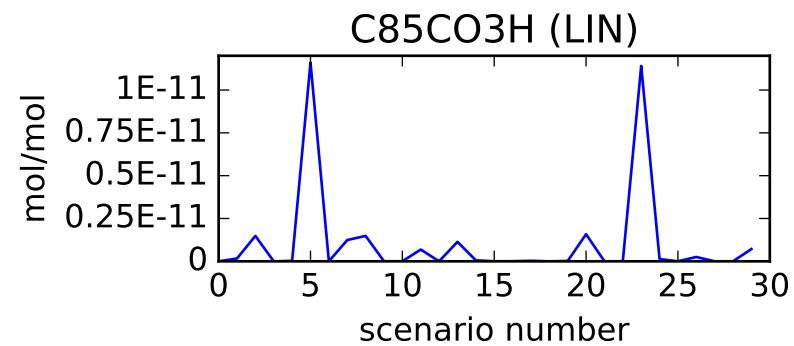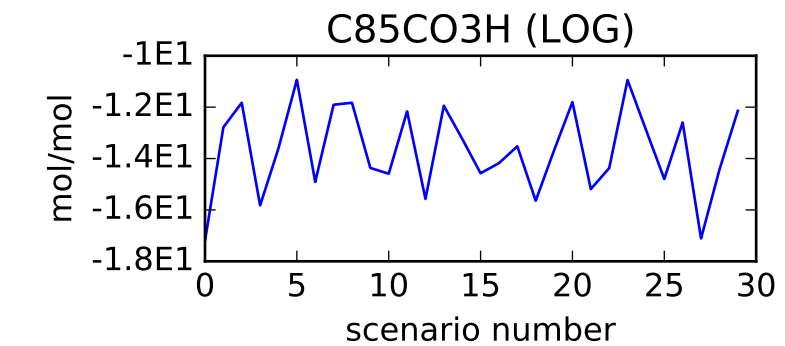



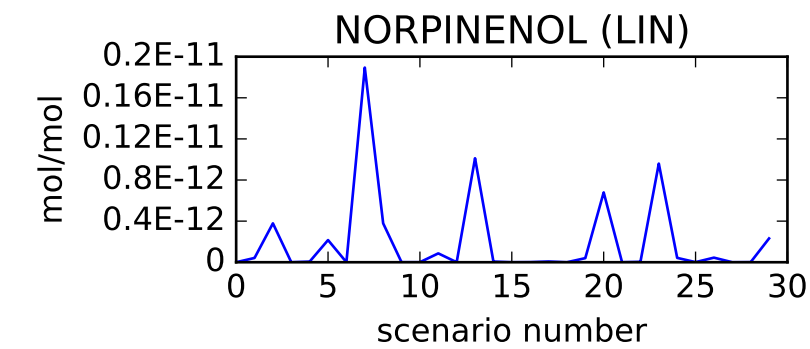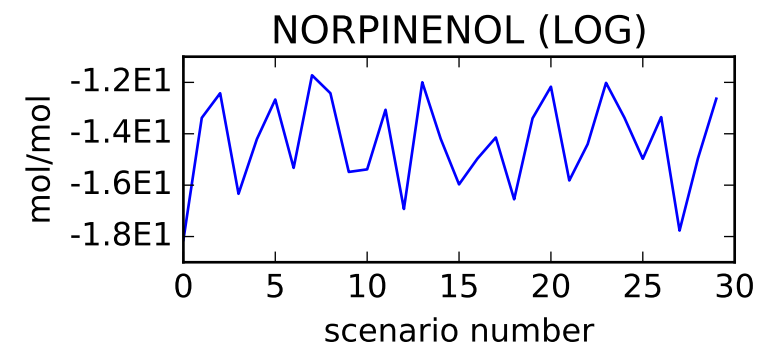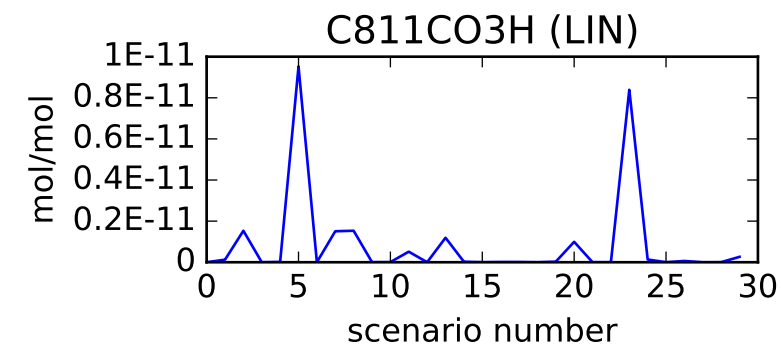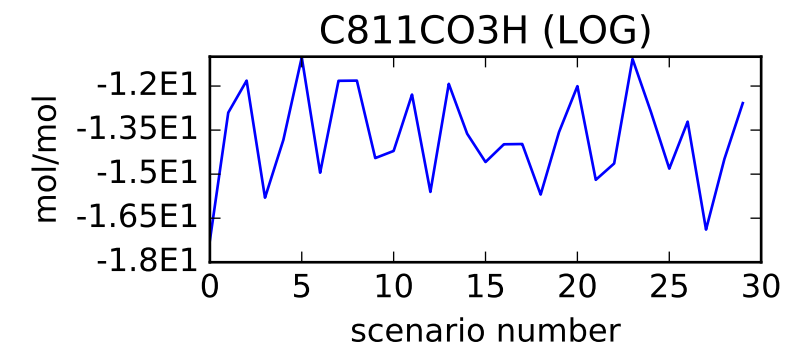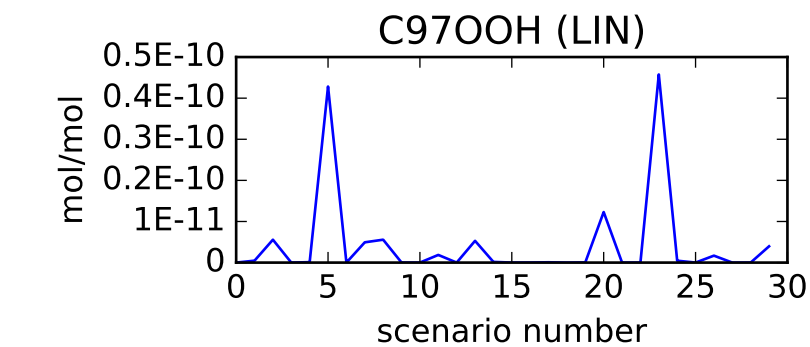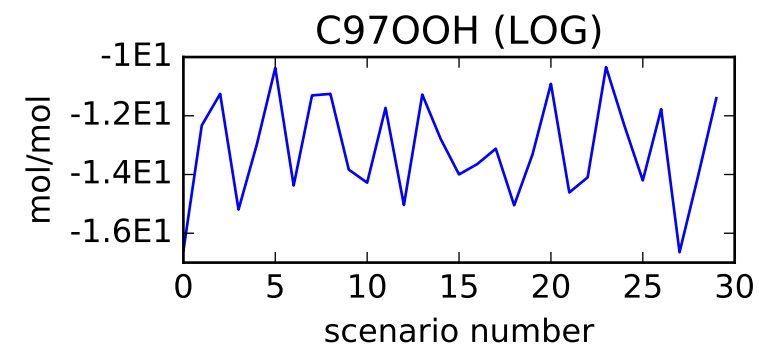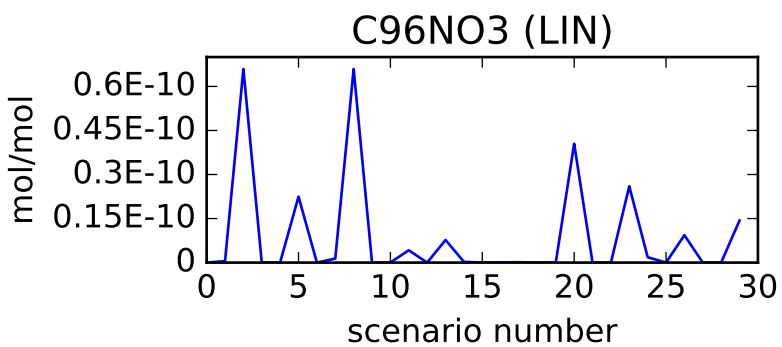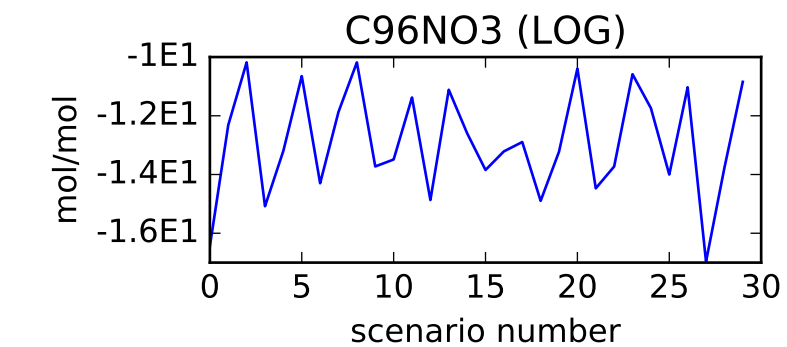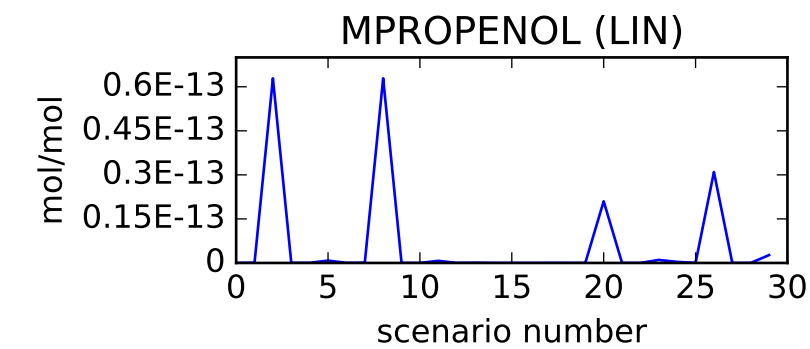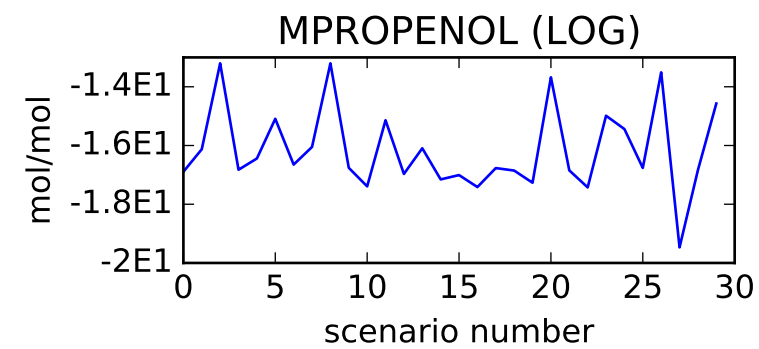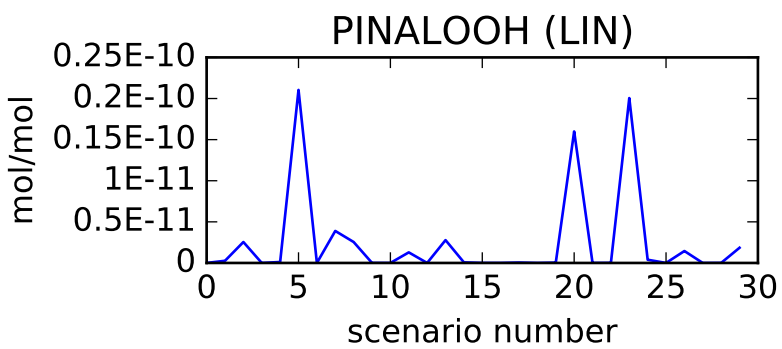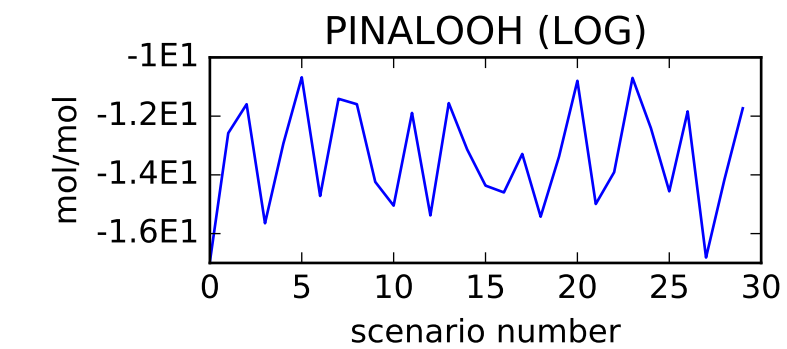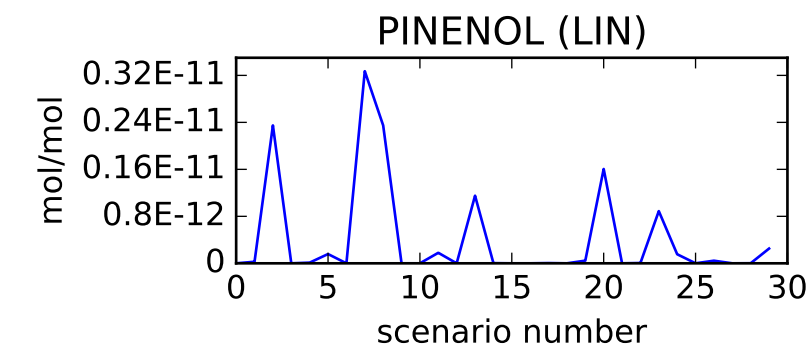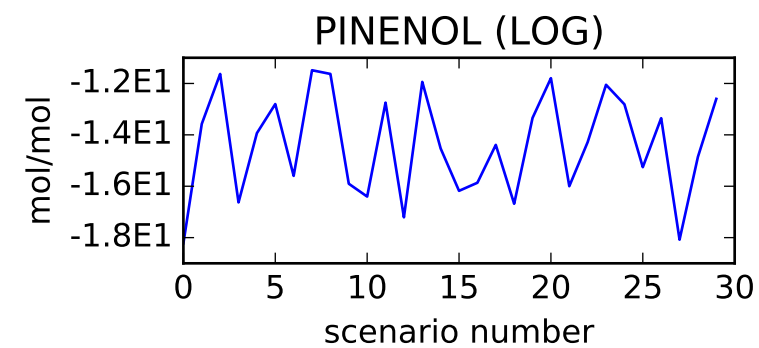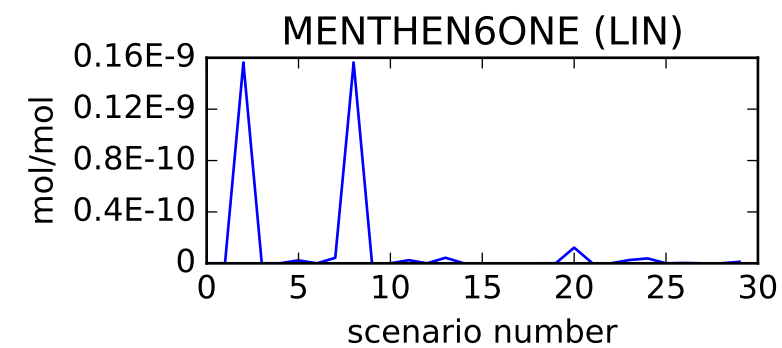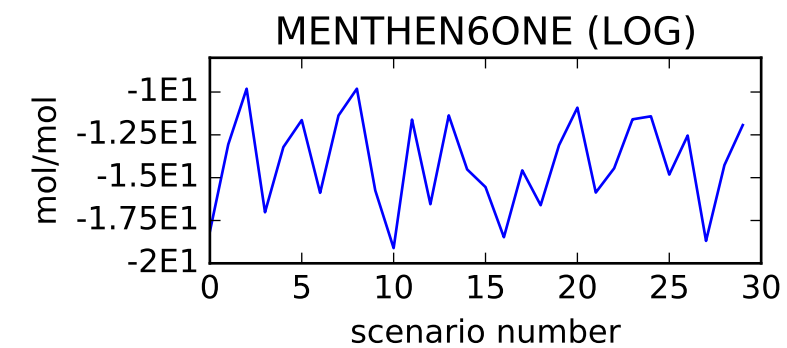

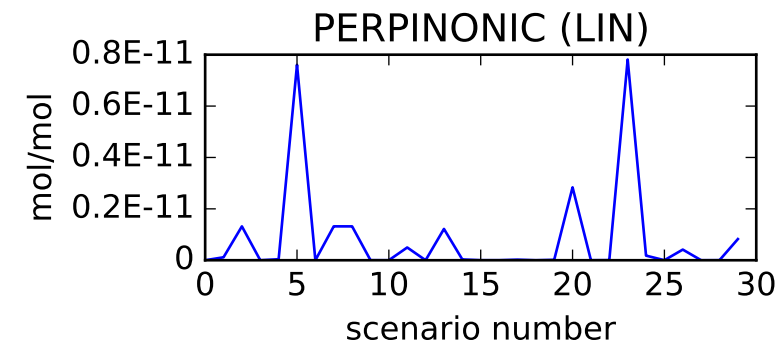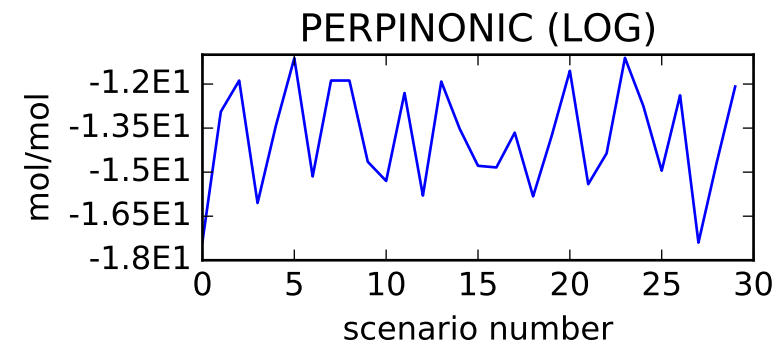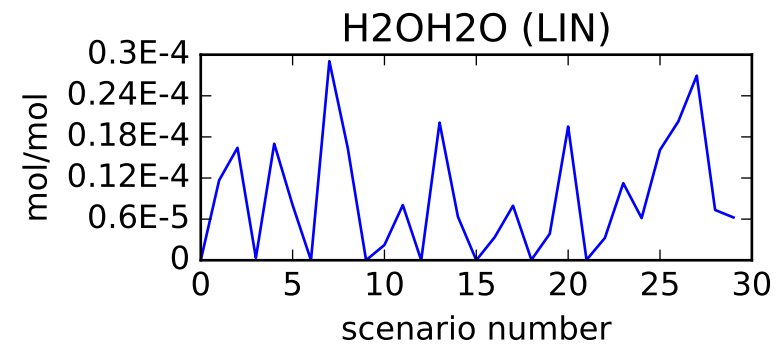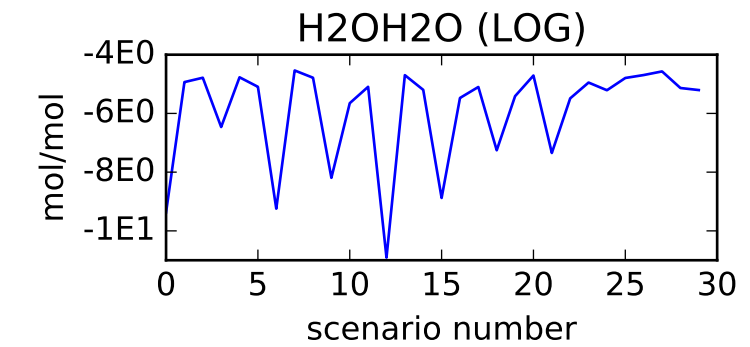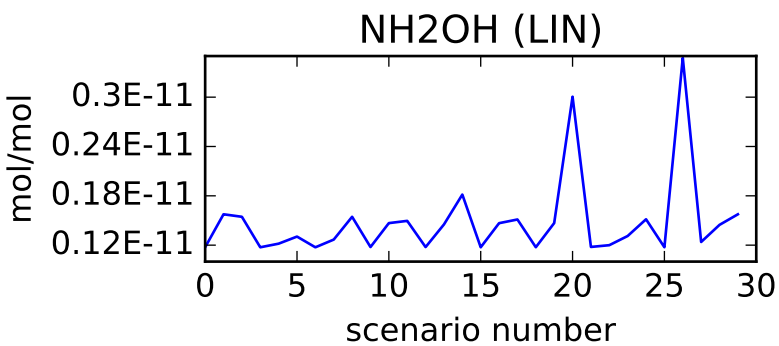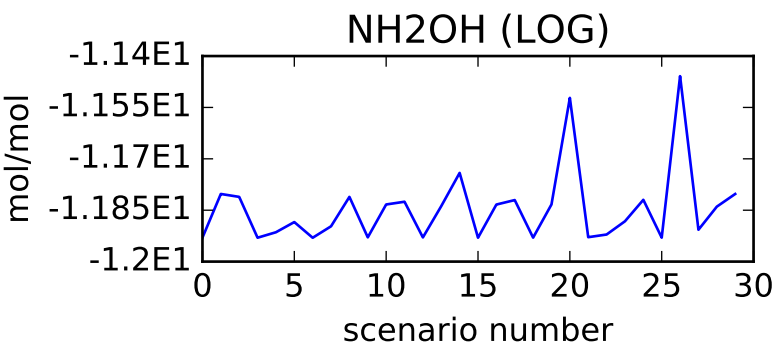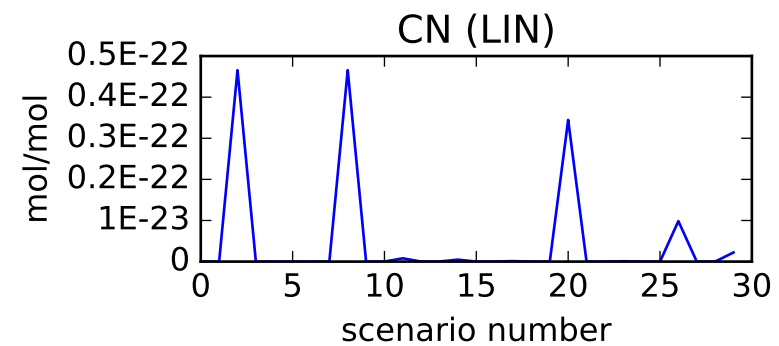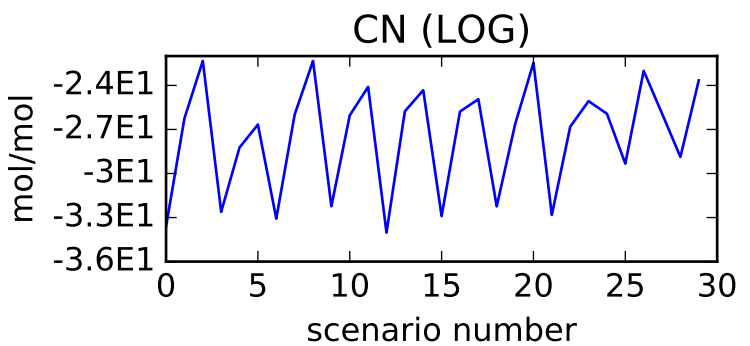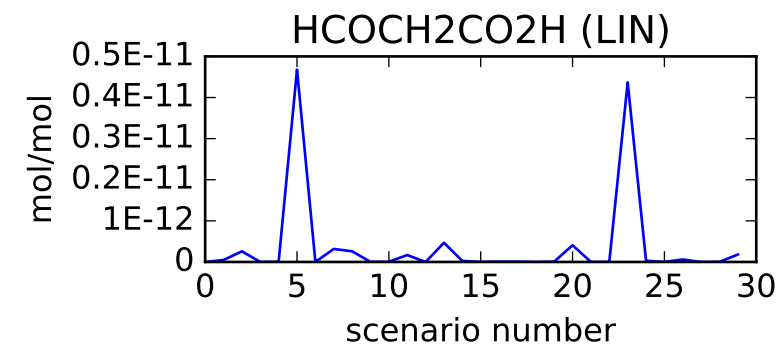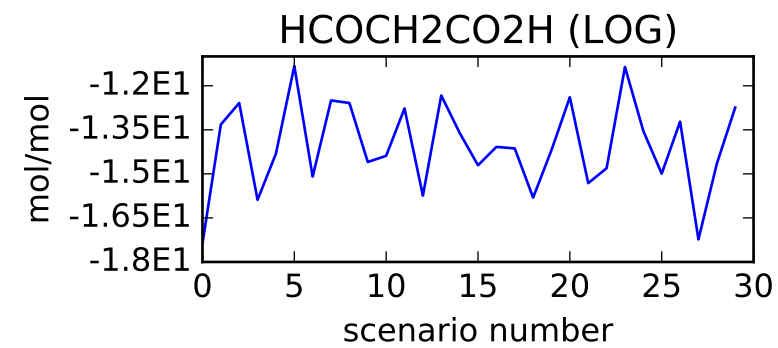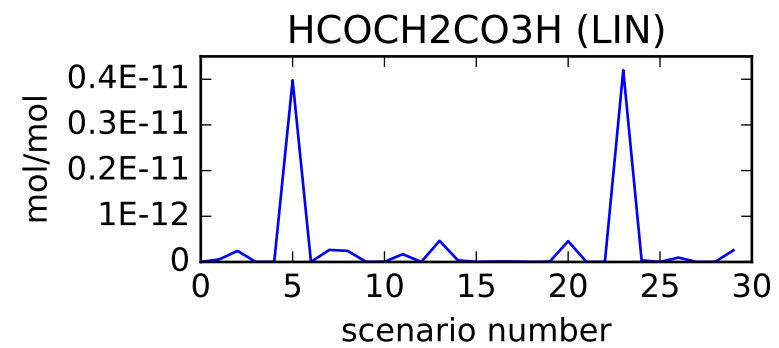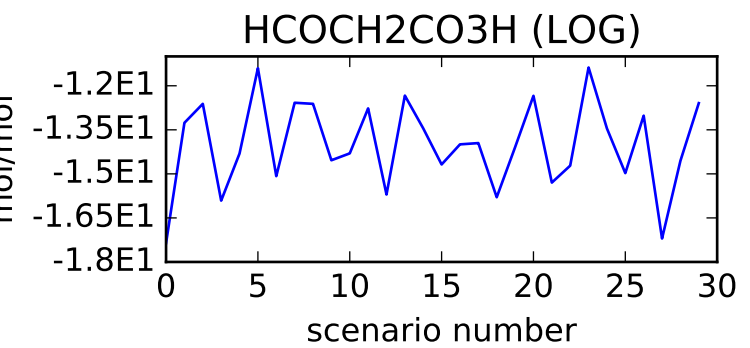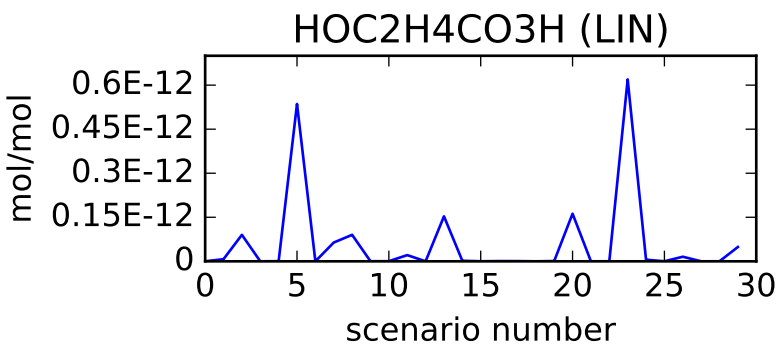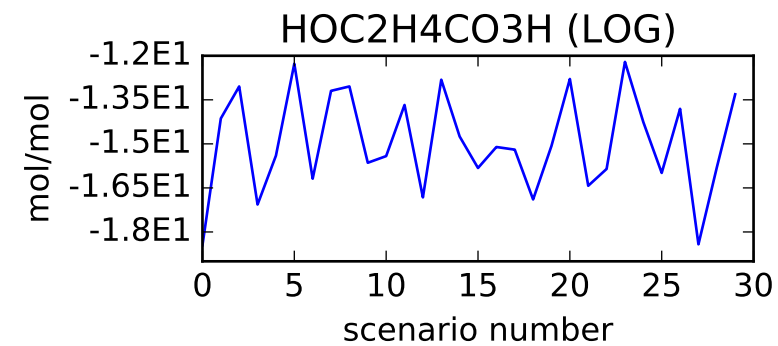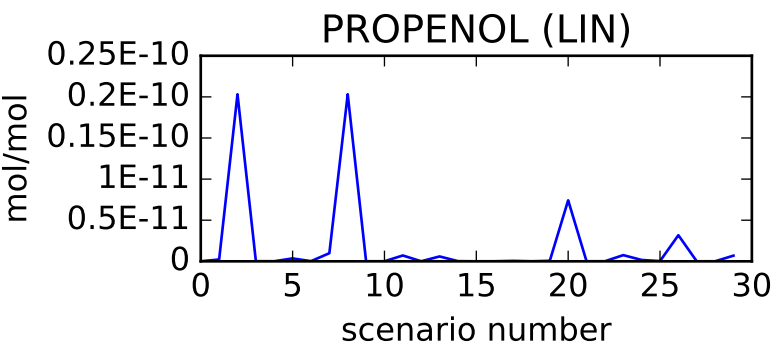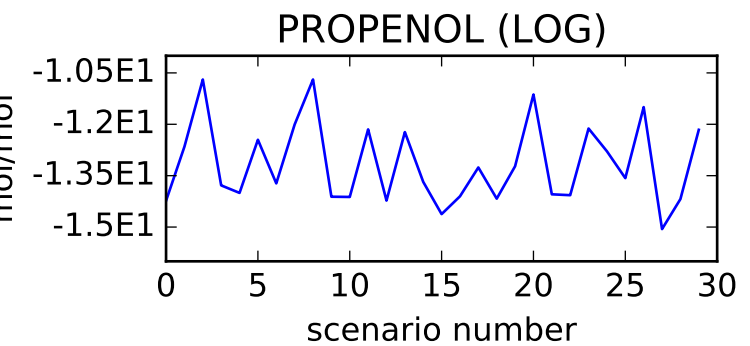

C2H5CO2H (LIN)

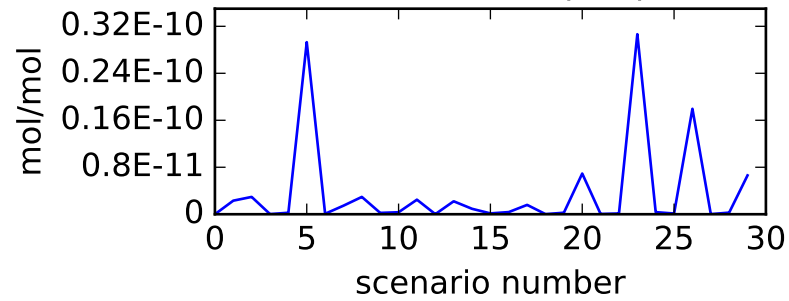

C2H5CO2H (LOG)

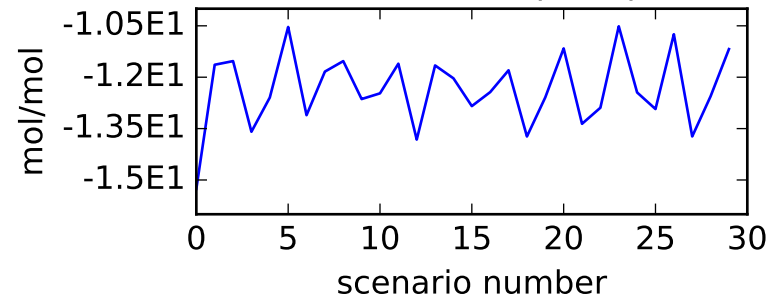

ISOPBOH (LIN)

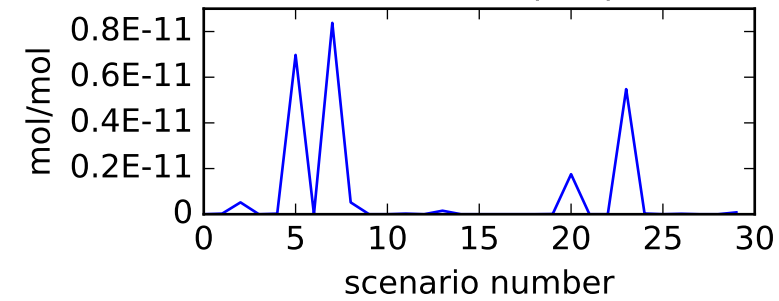

ISOPBOH (LOG)

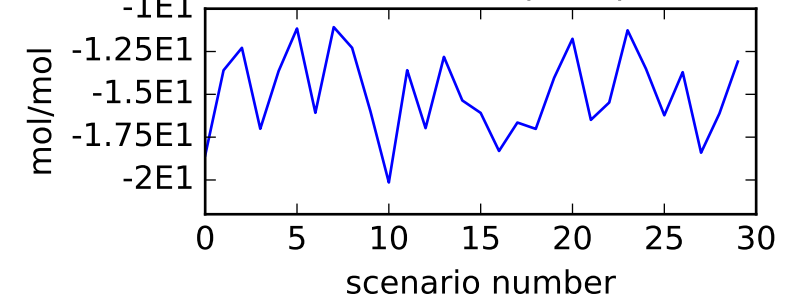

PHCOOH (LIN)

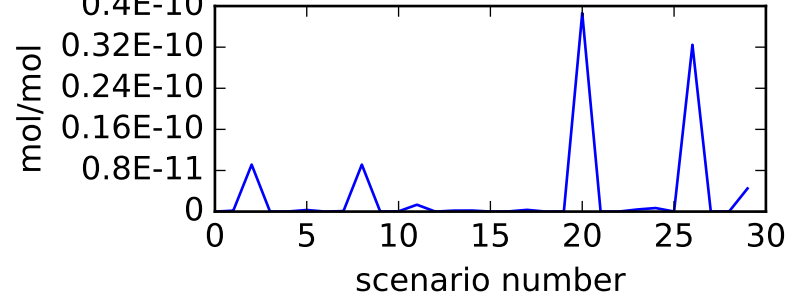

PHCOOH (LOG)

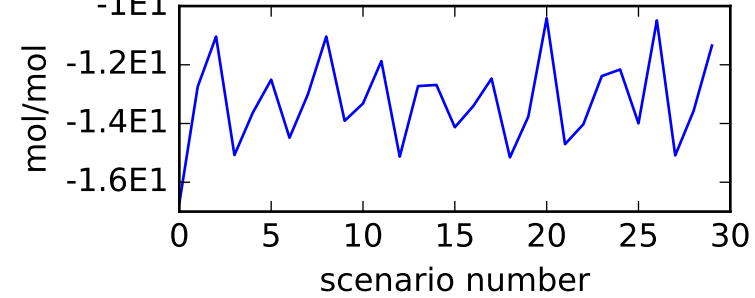

C8BC (LIN)

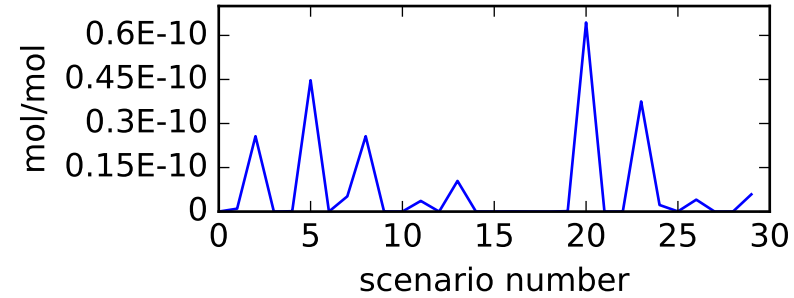

C8BC (LOG)

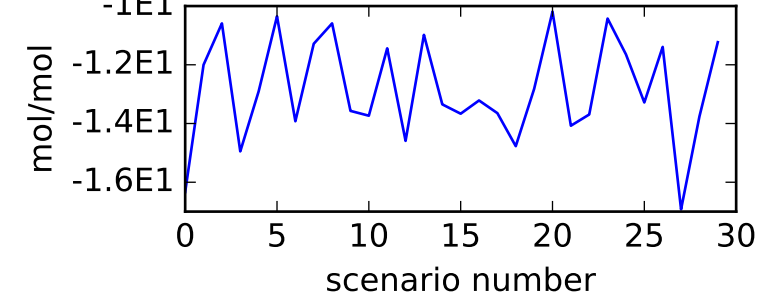

CH3CI (LIN)

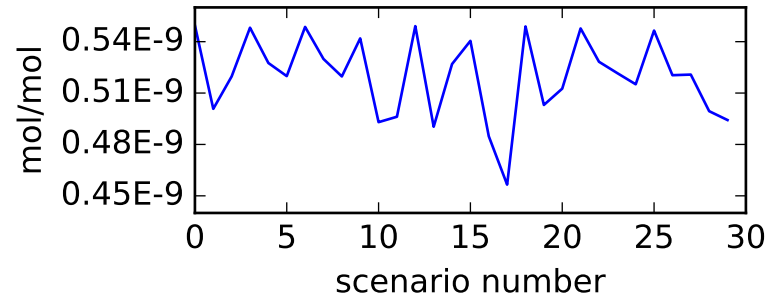

CH3CI (LOG)

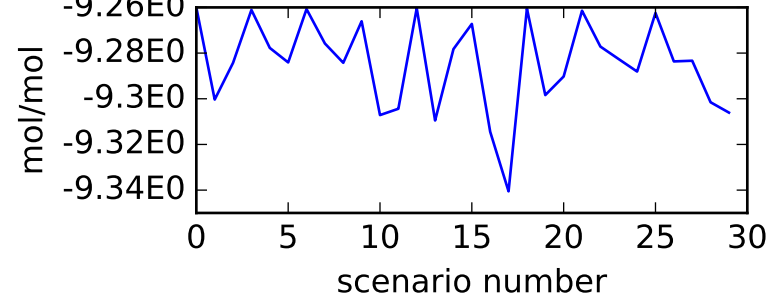

C2H6 (LIN)

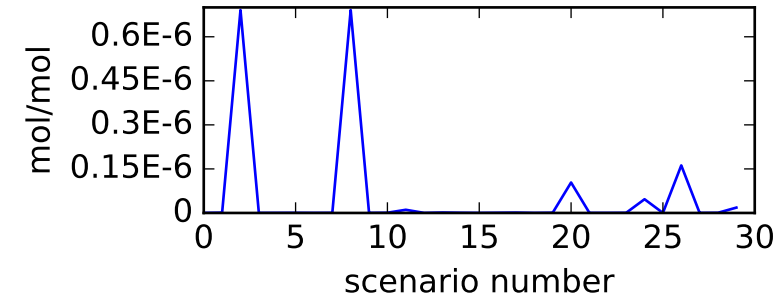

C2H6 (LOG)

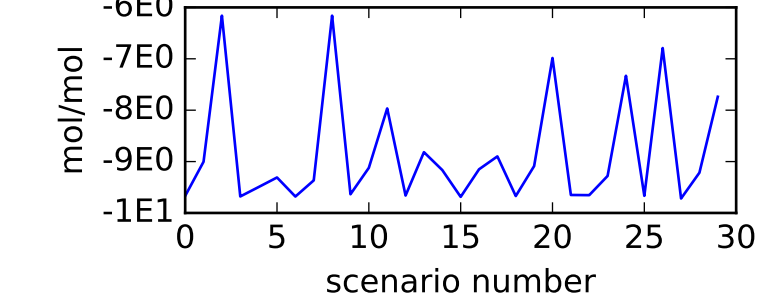

C2H5OH (LIN)

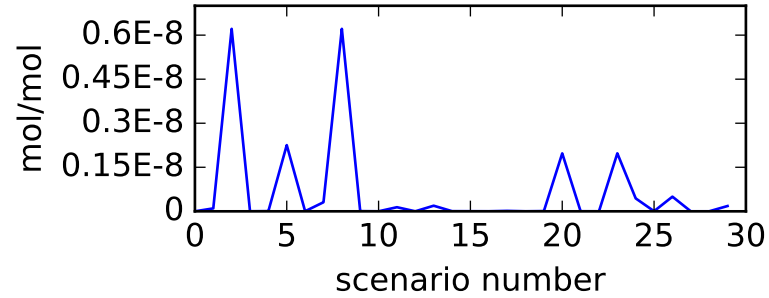

C2H5OH (LOG)

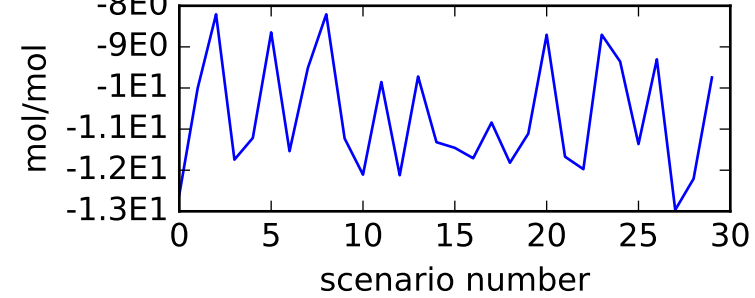

NPROPOL (LIN)

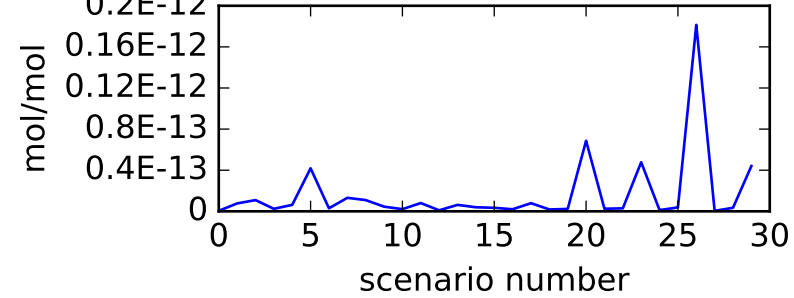

NPROPOL (LOG)

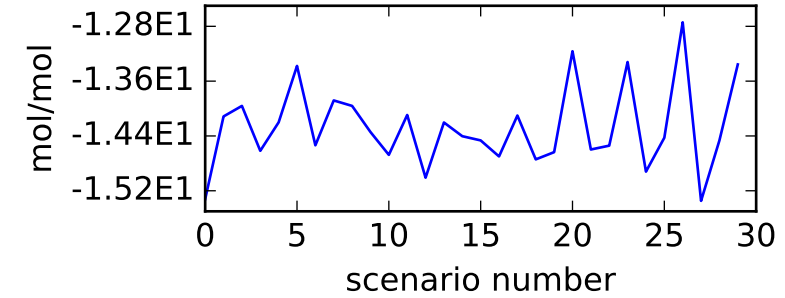

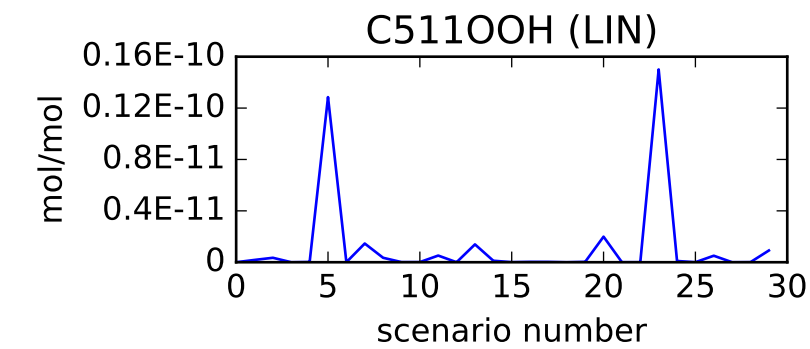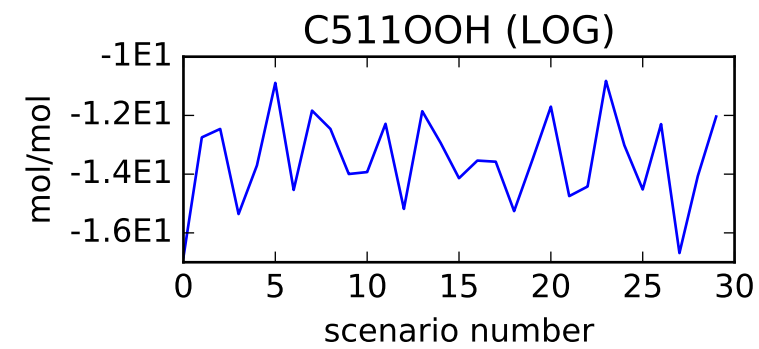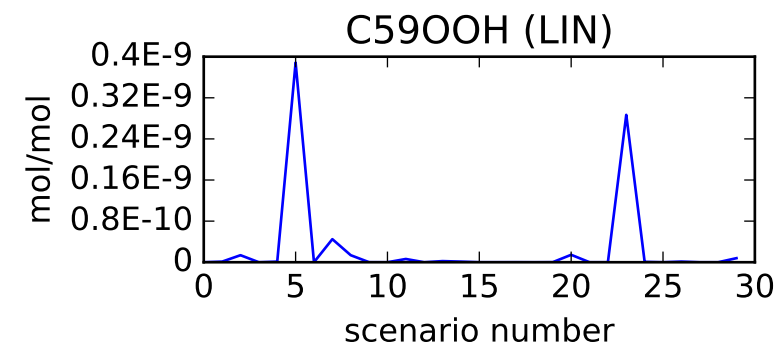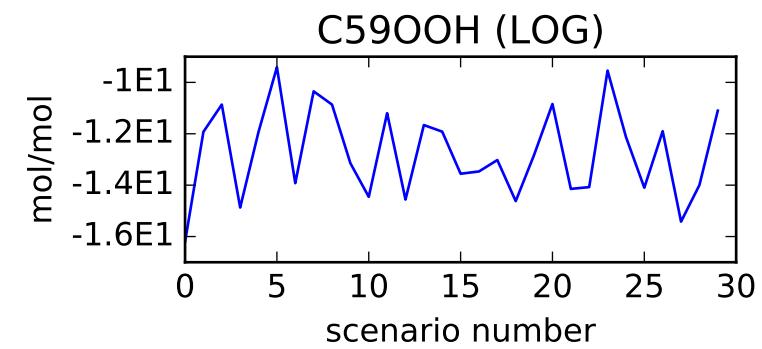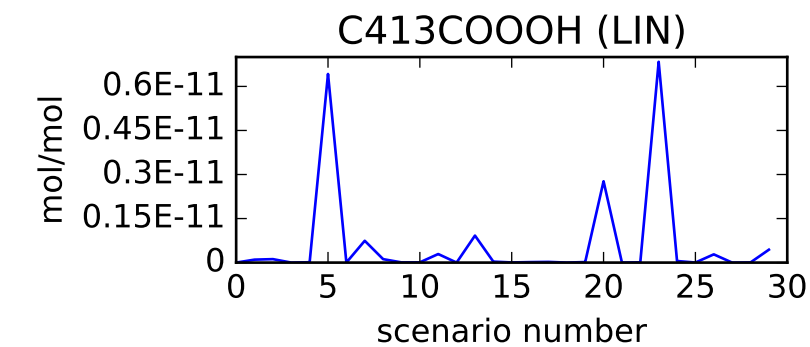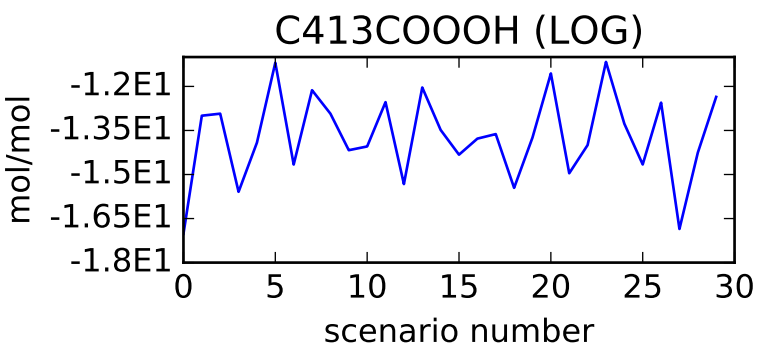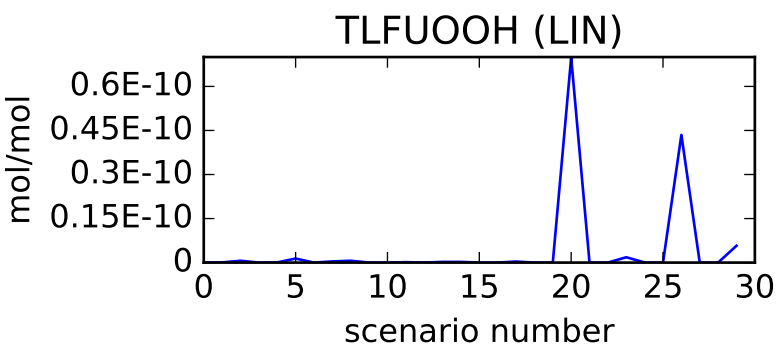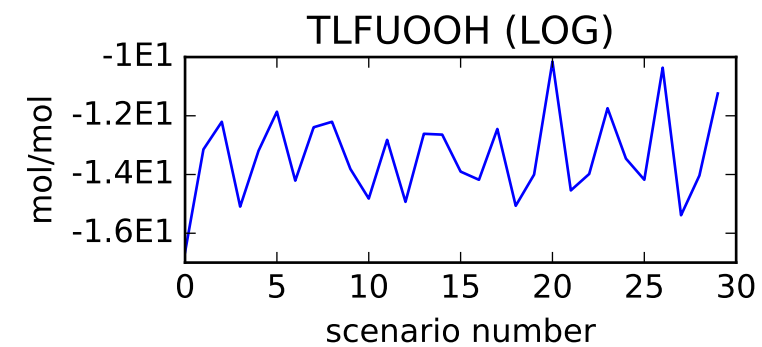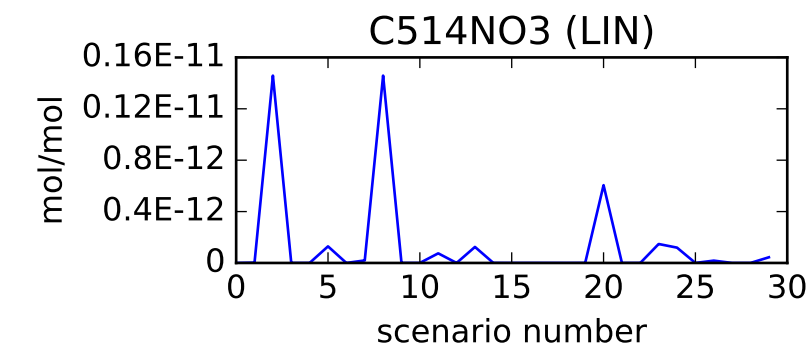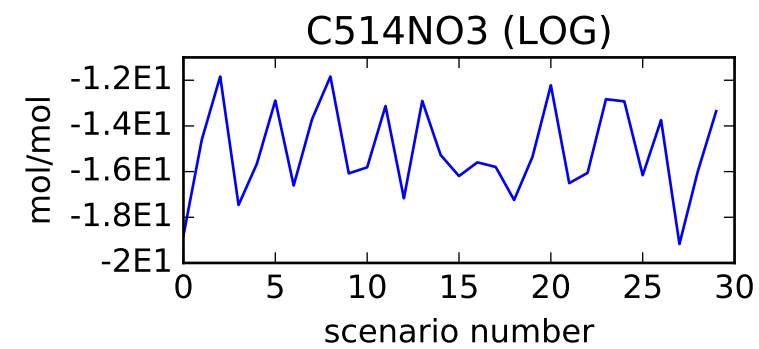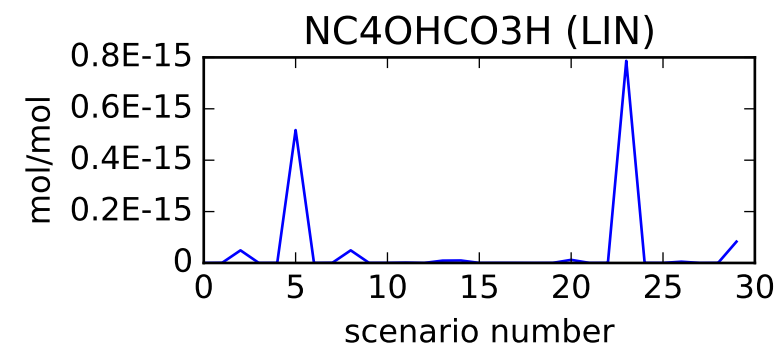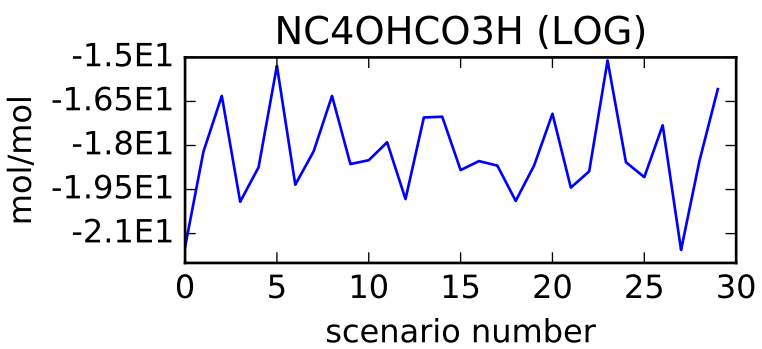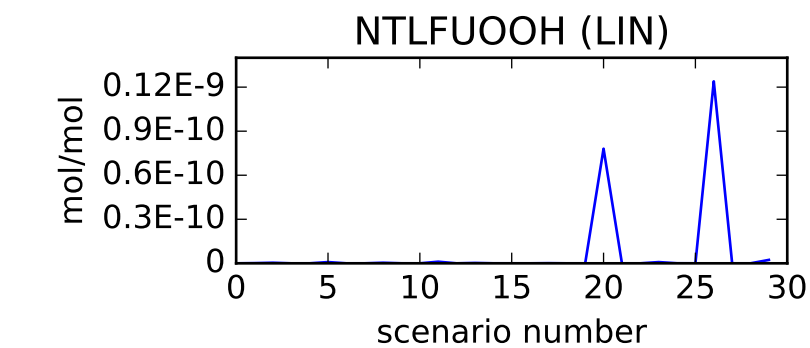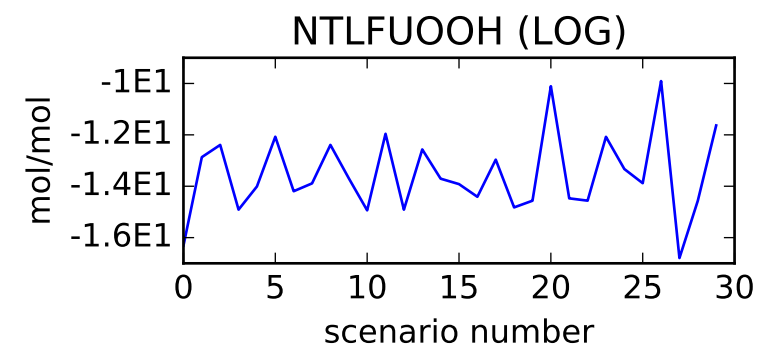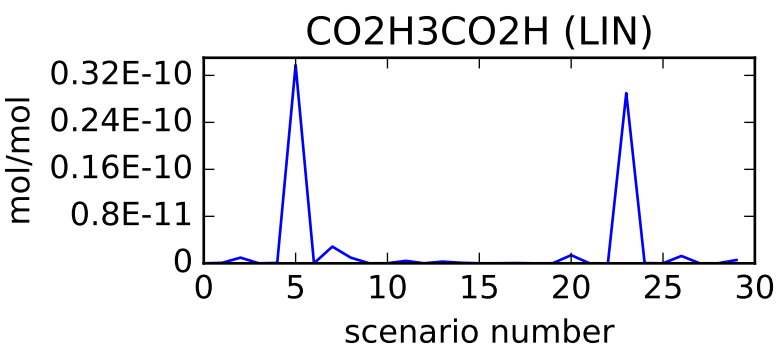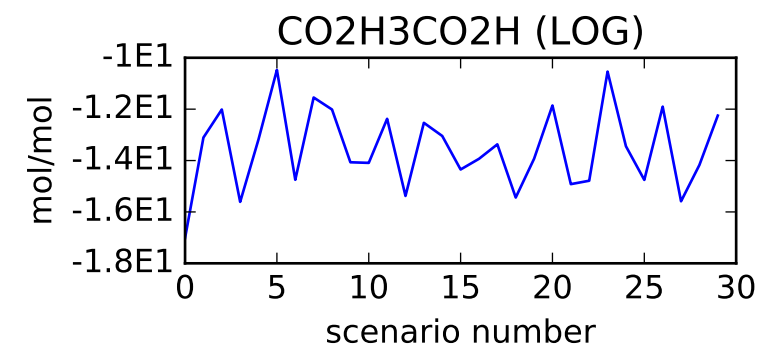

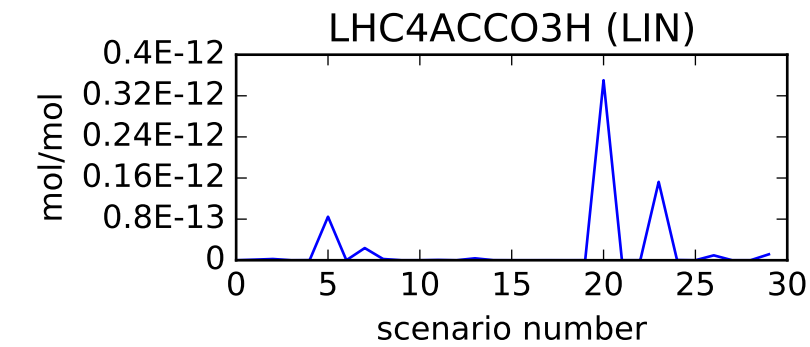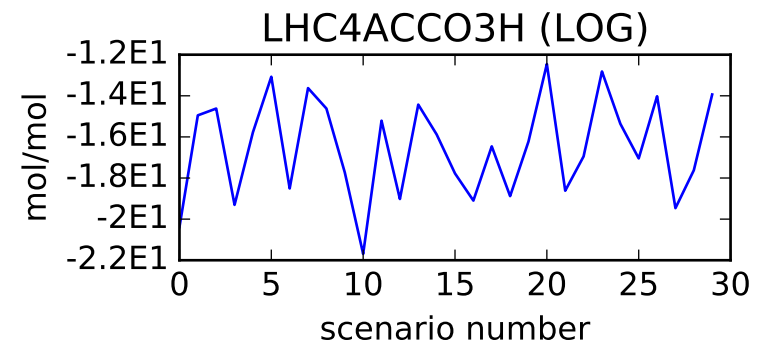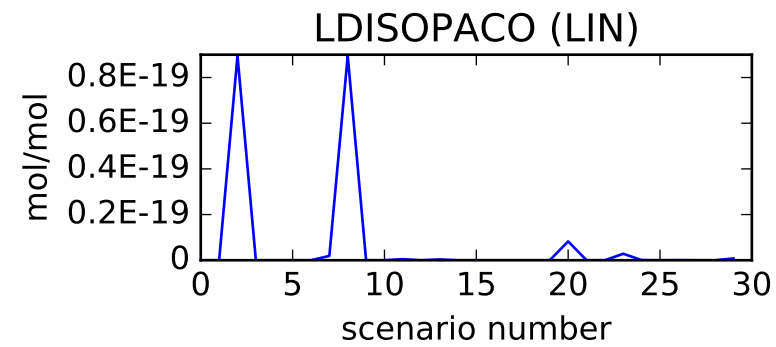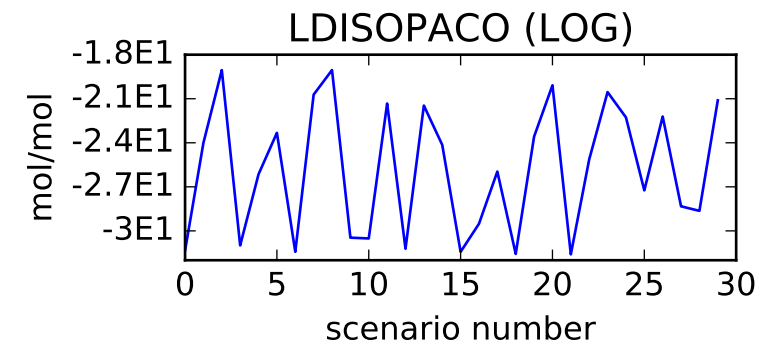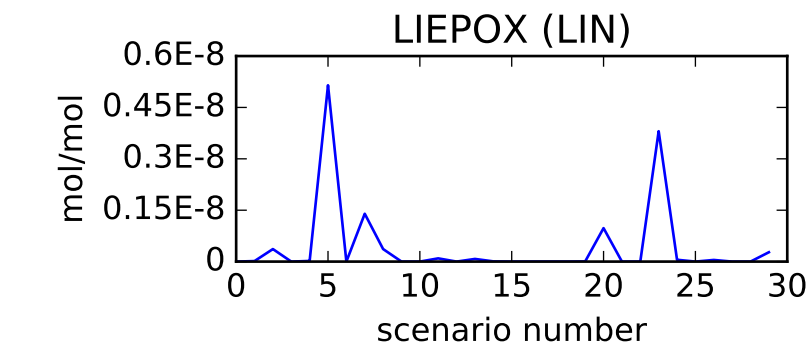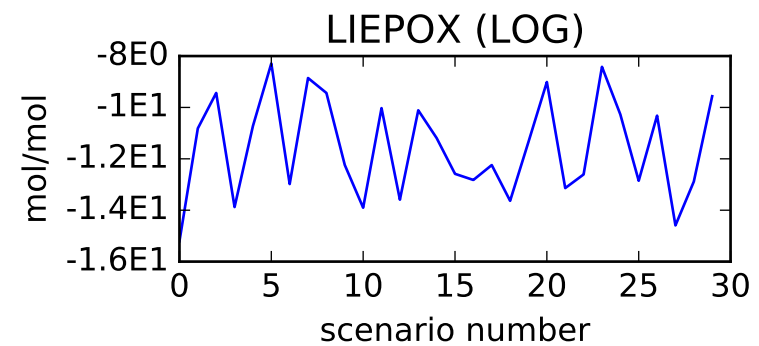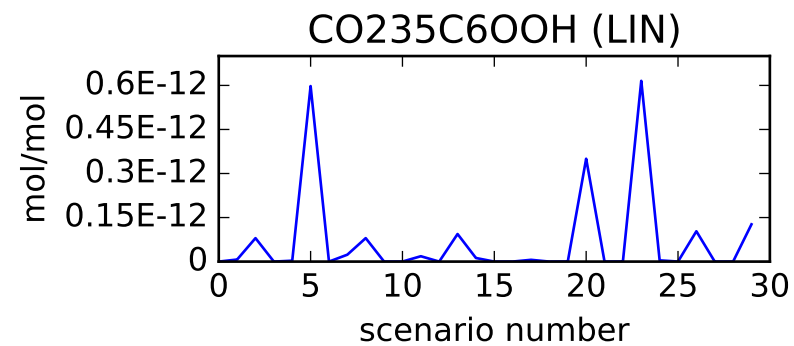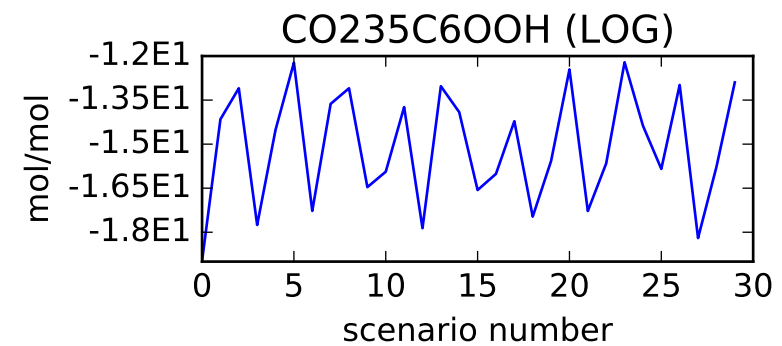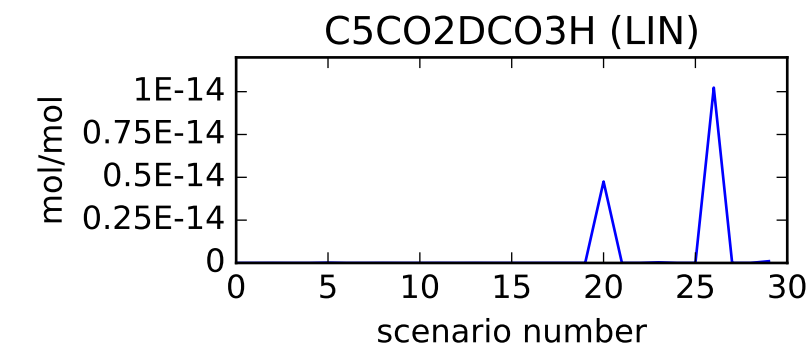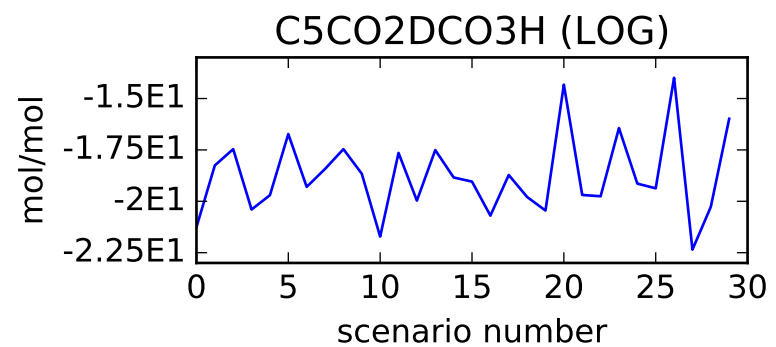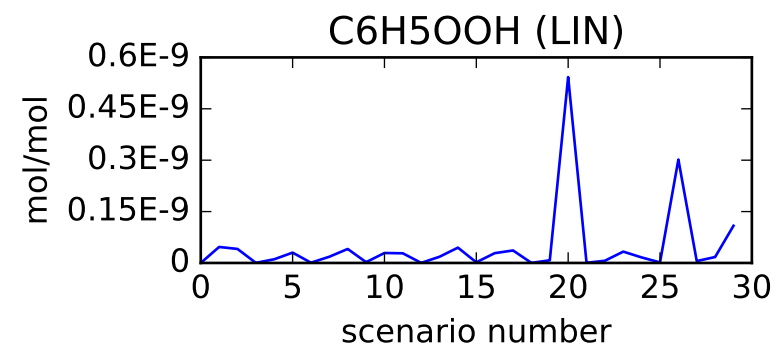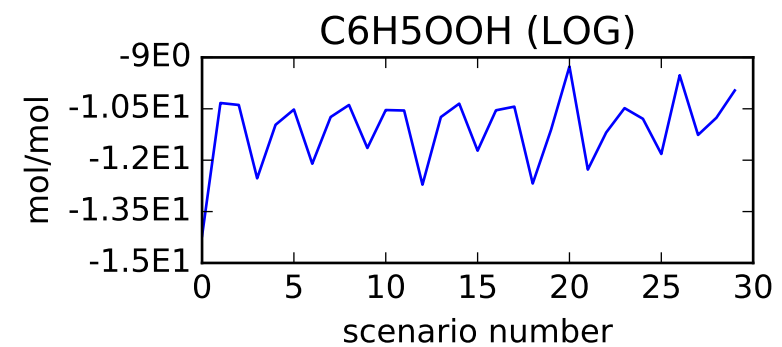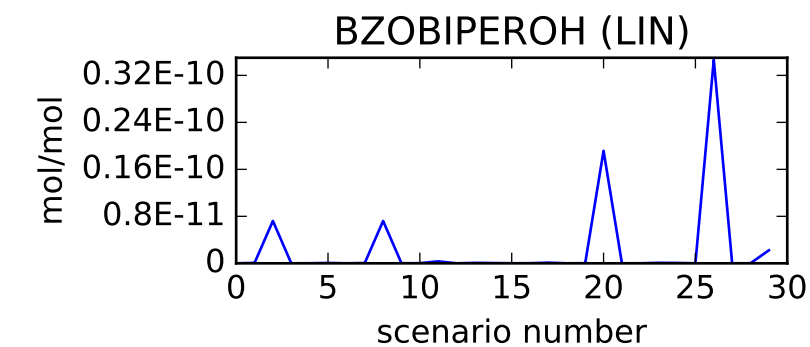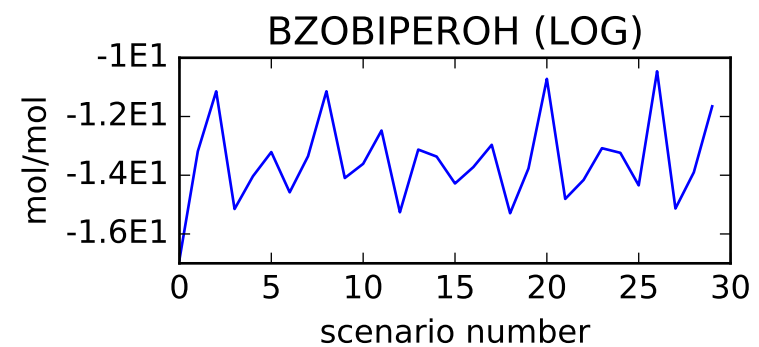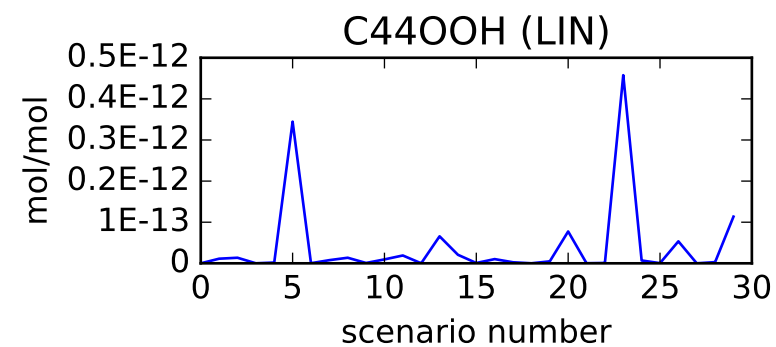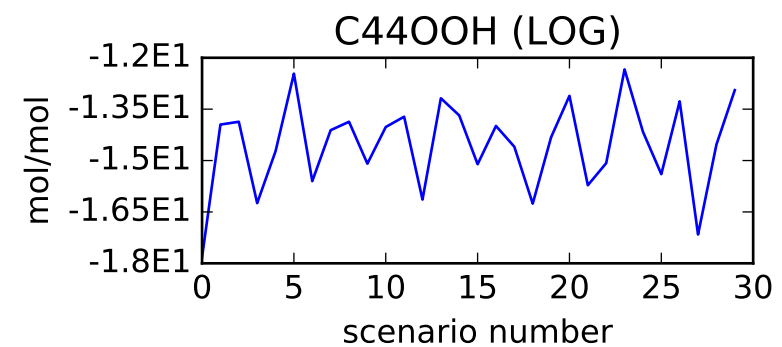

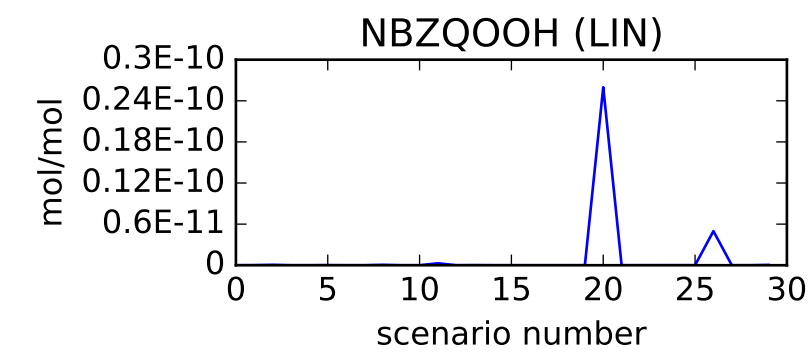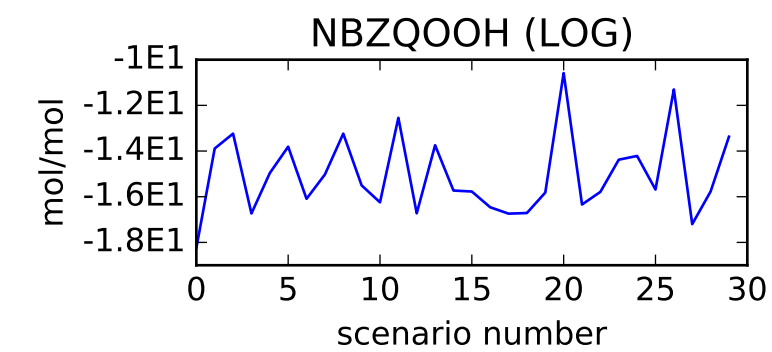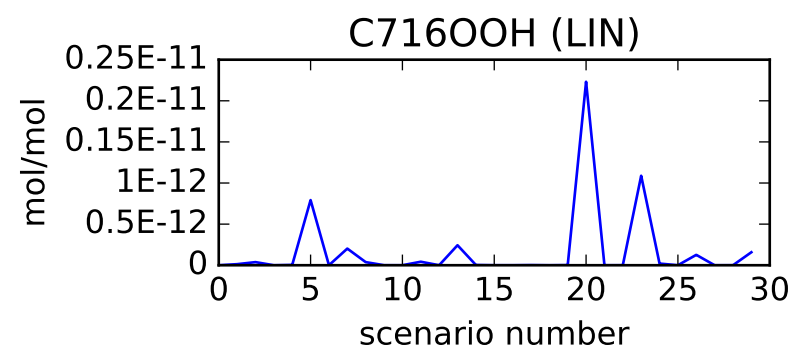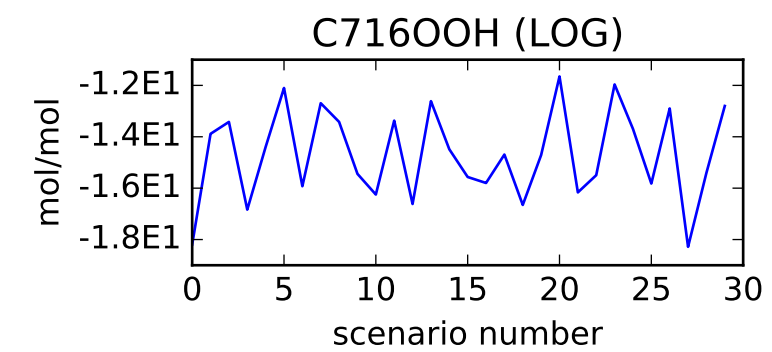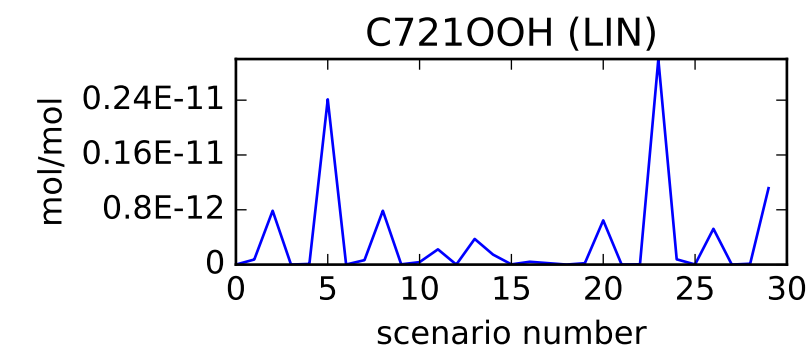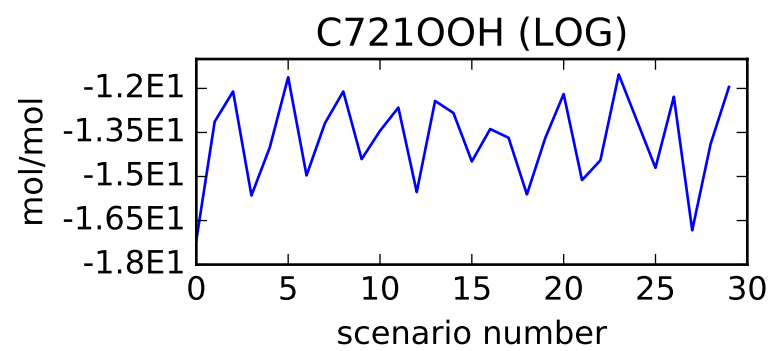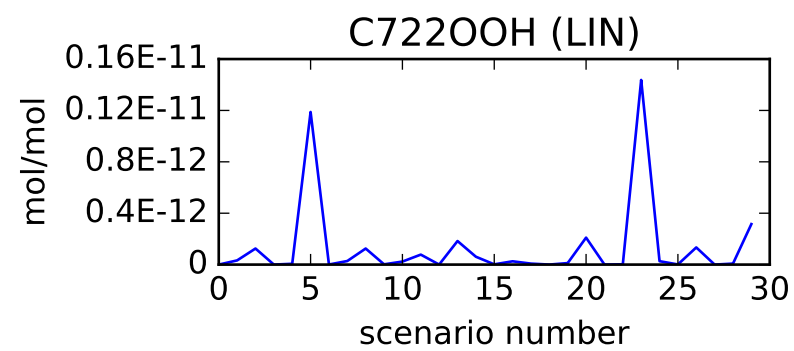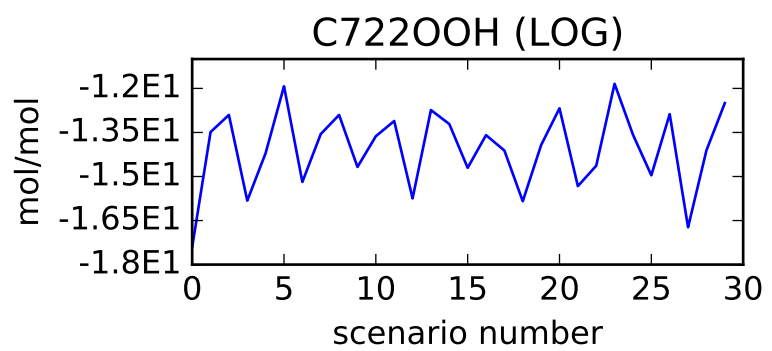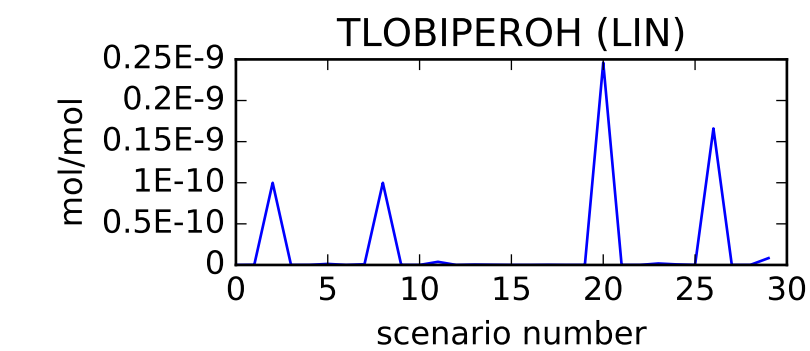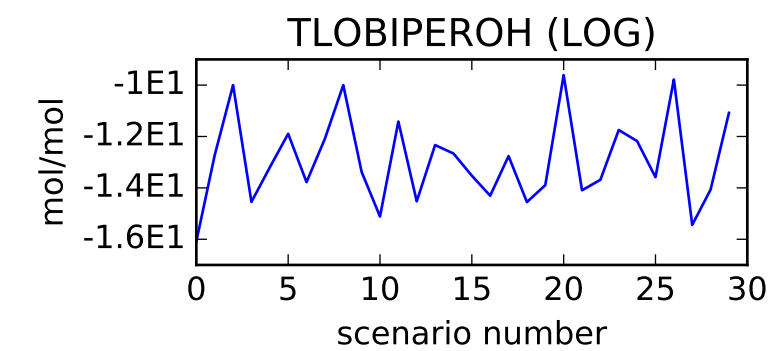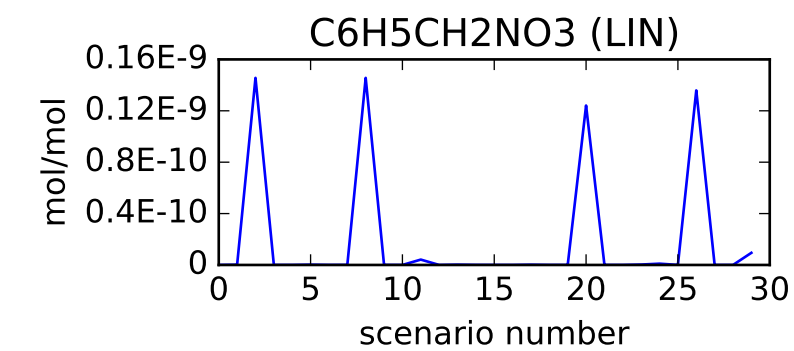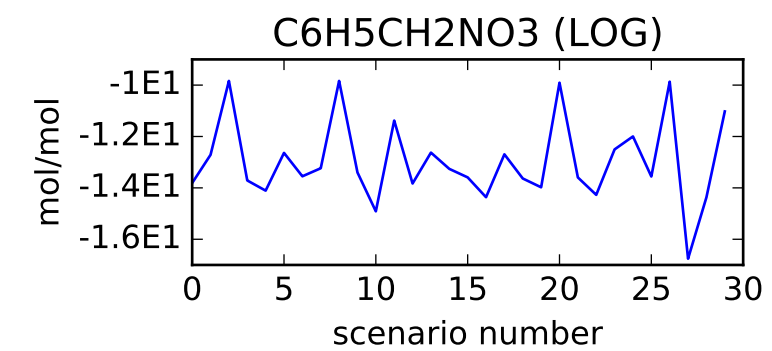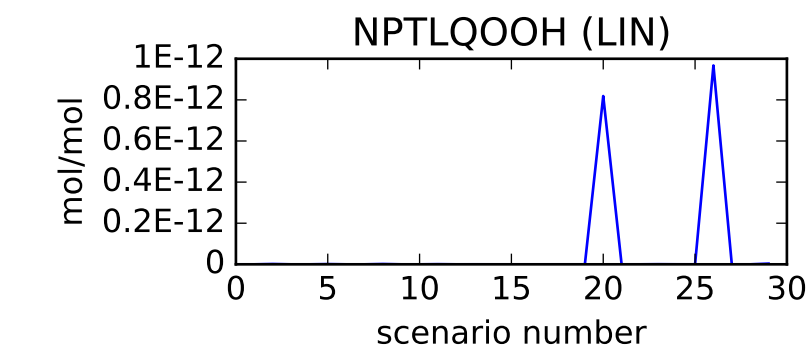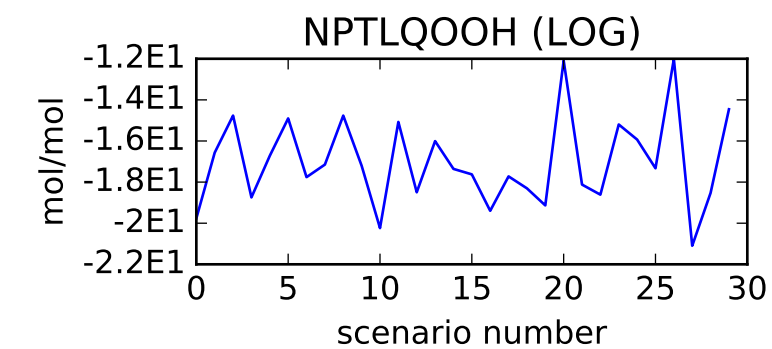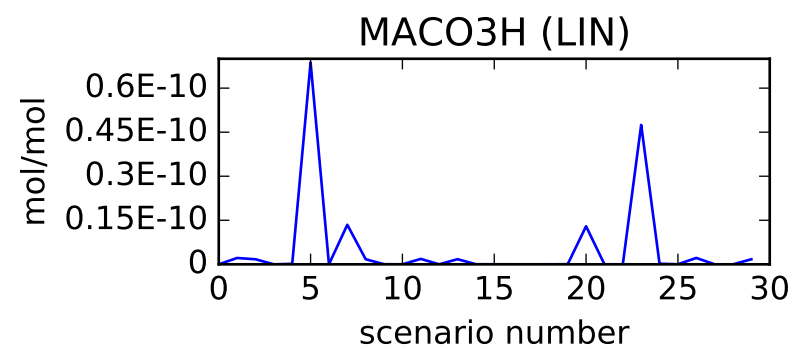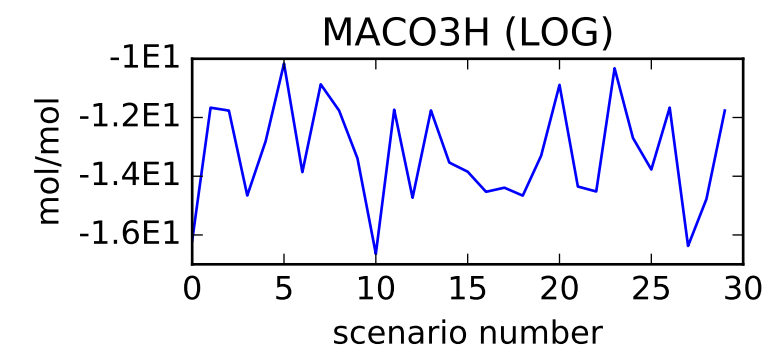



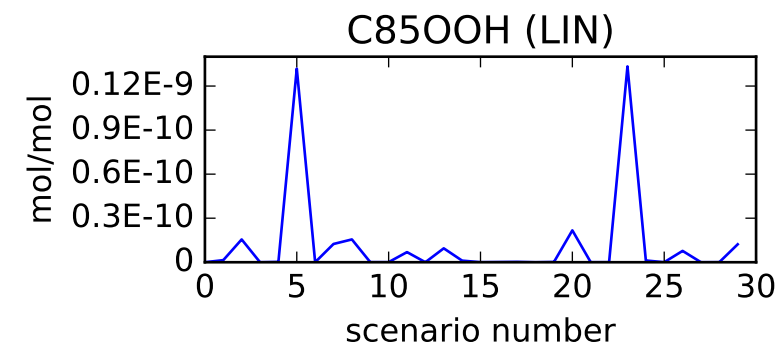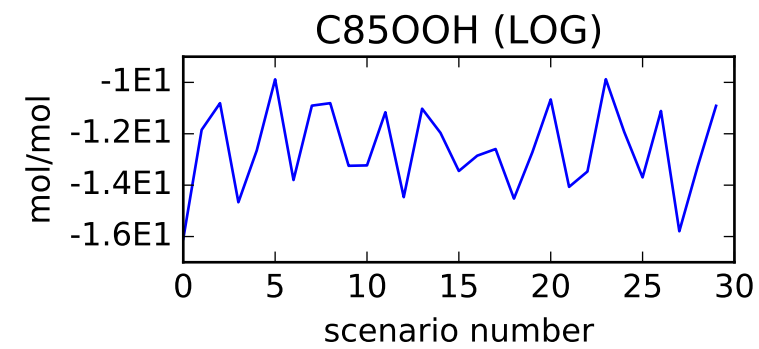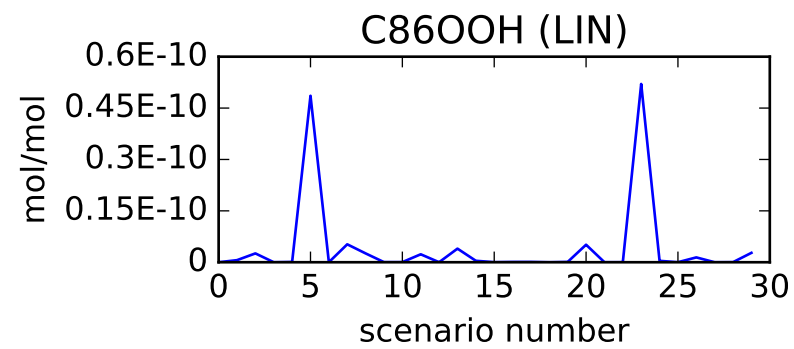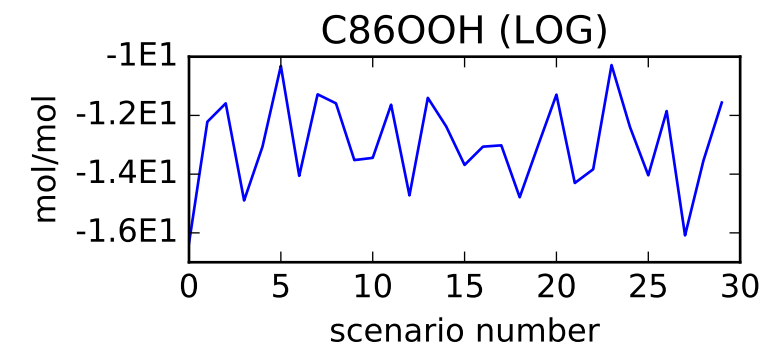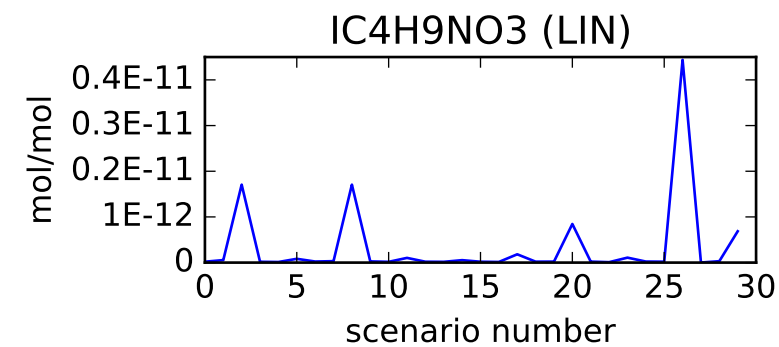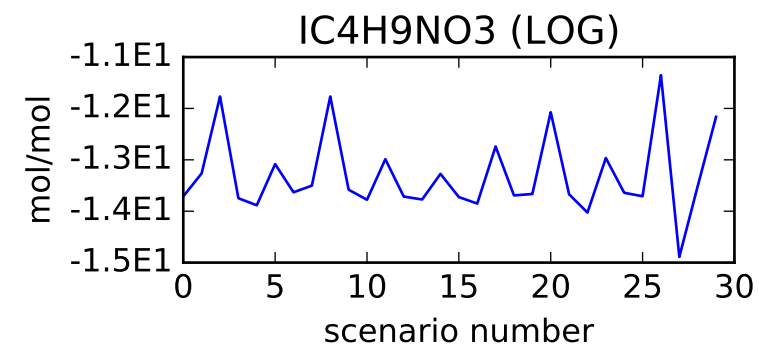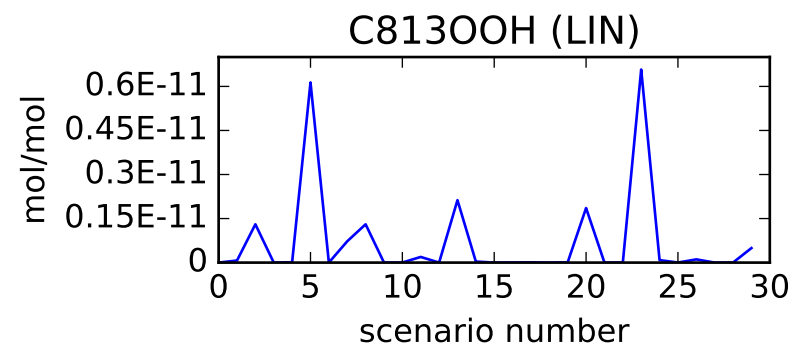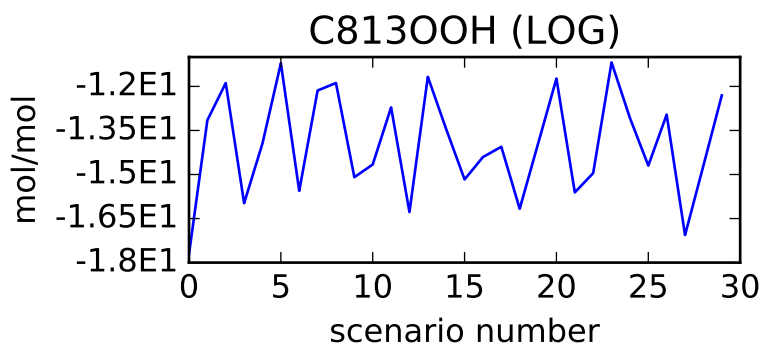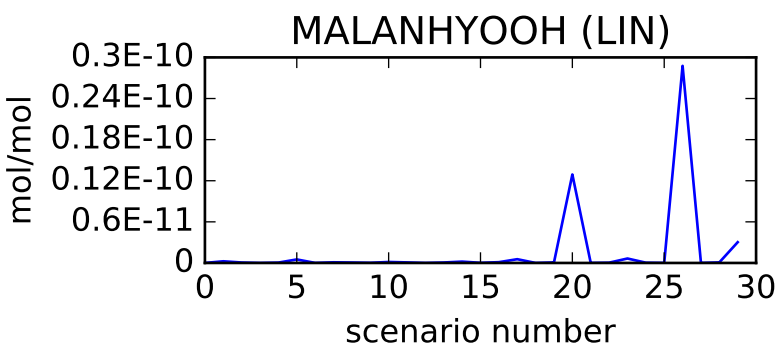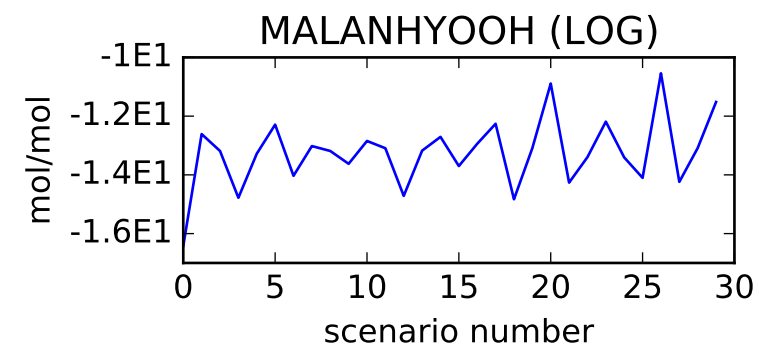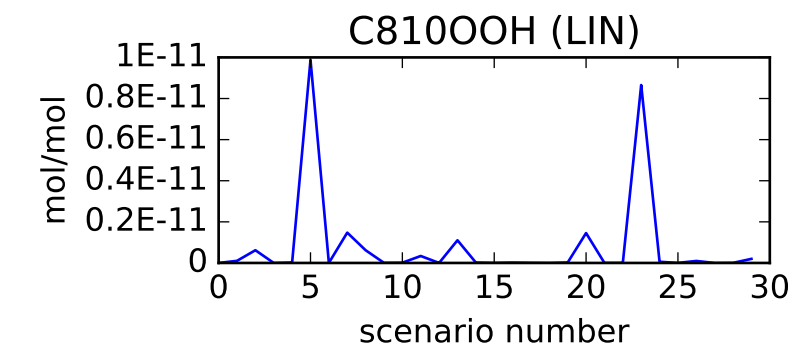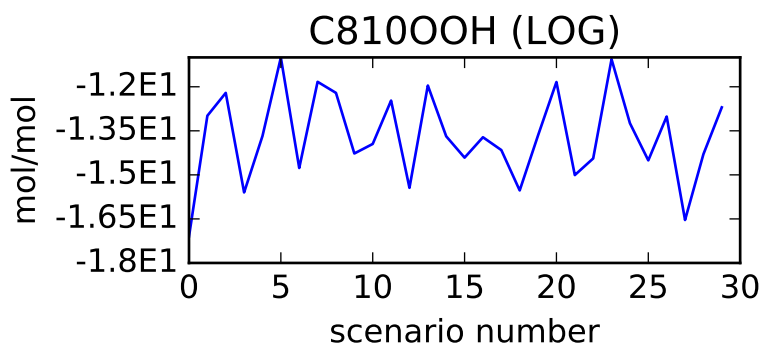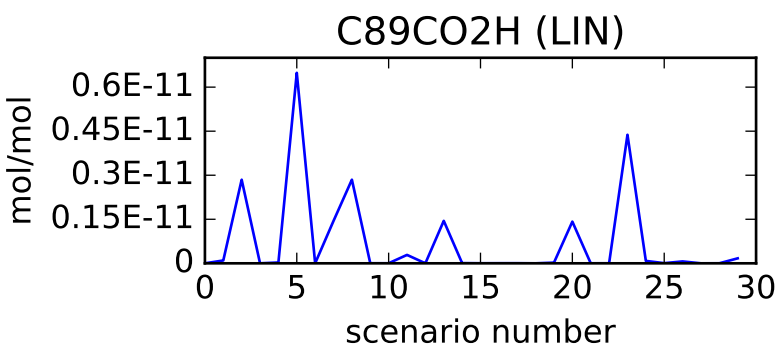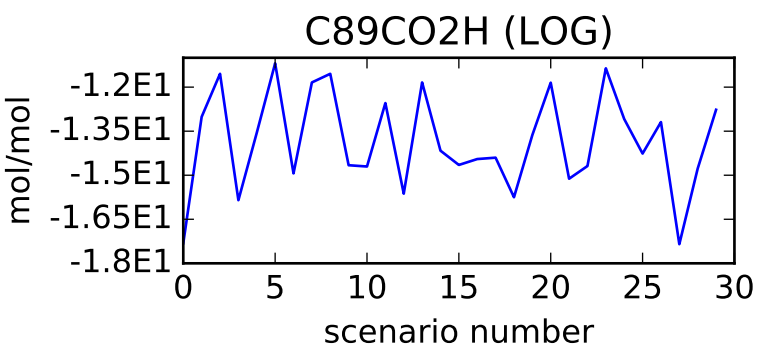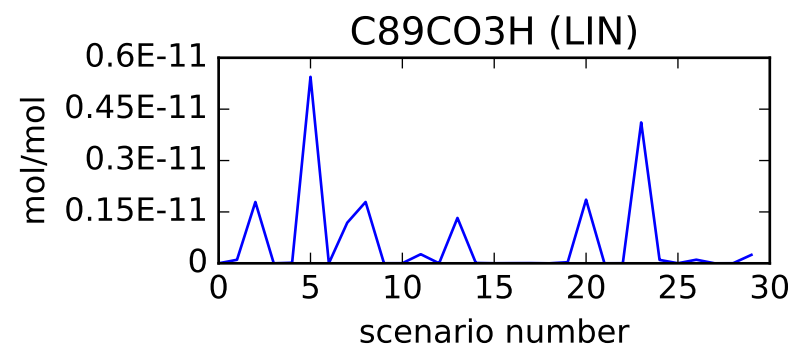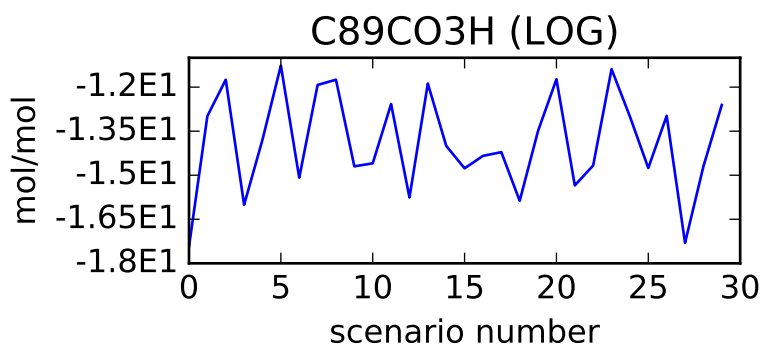

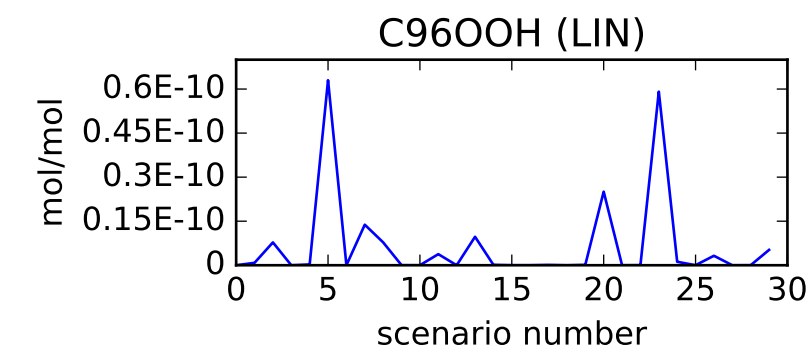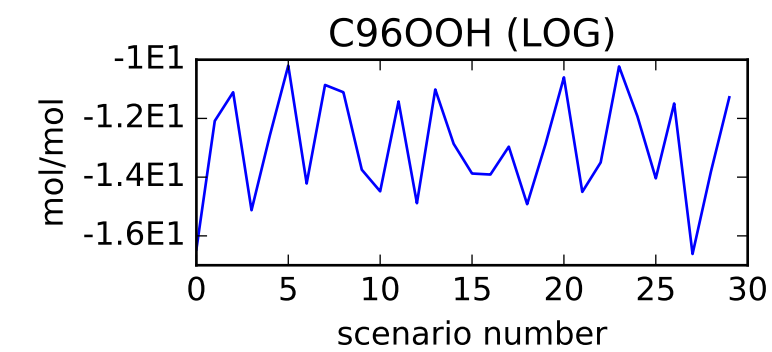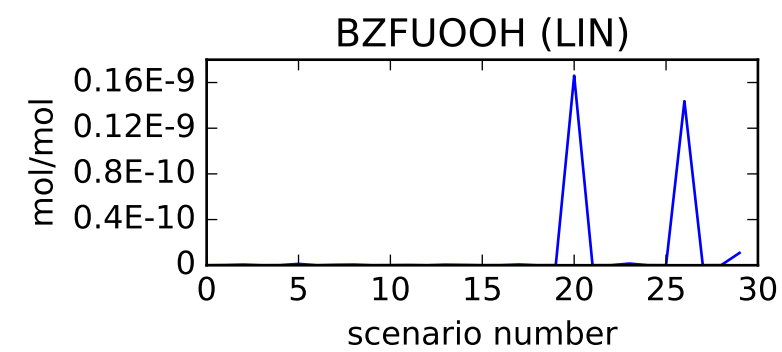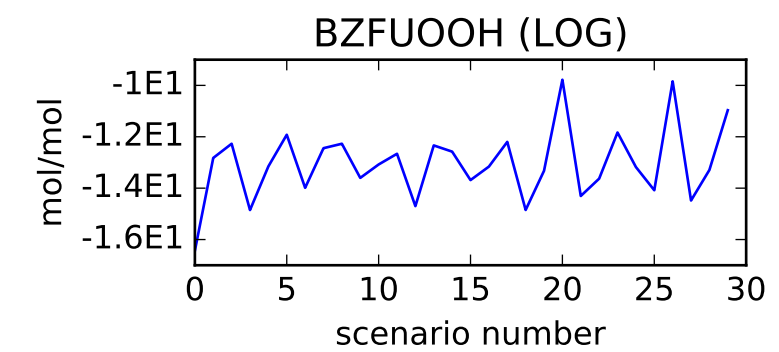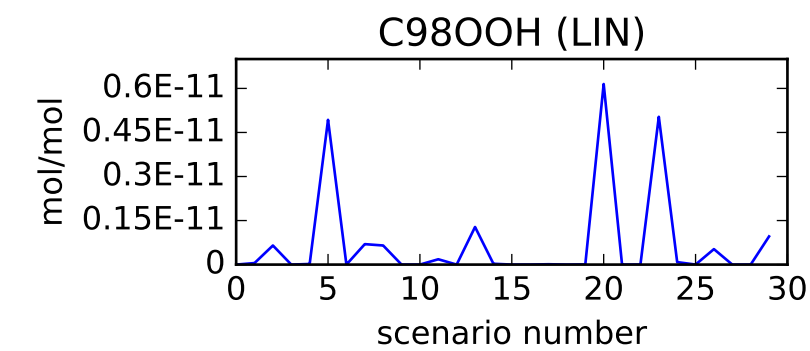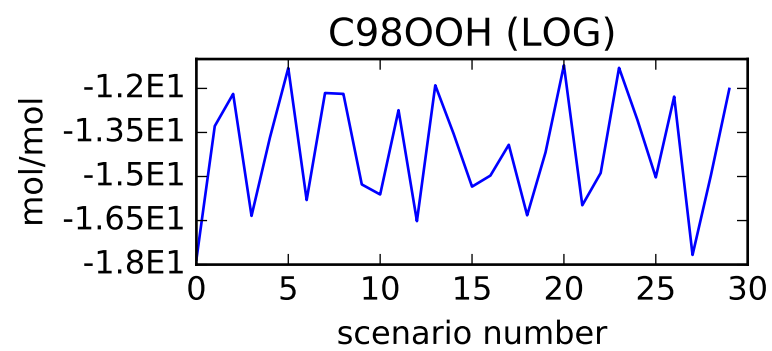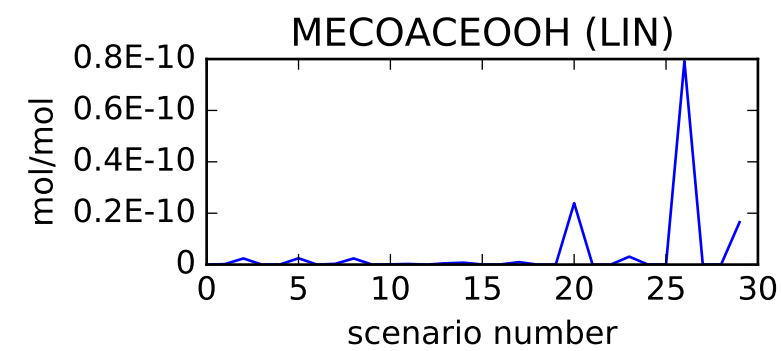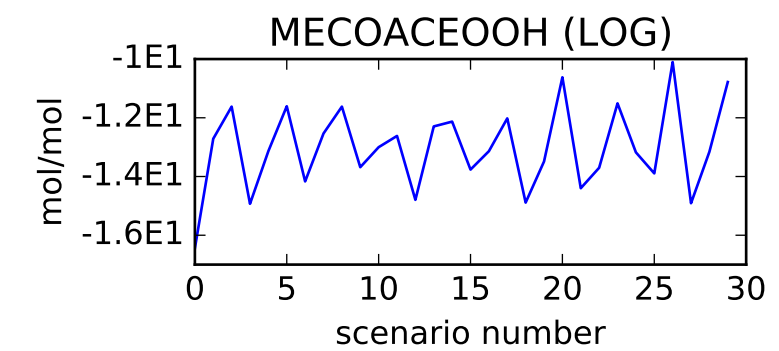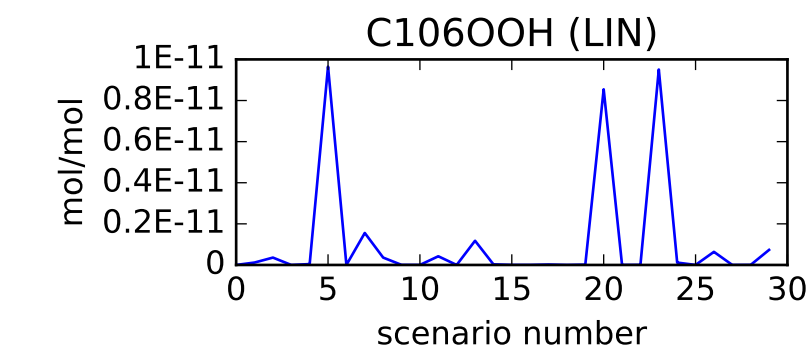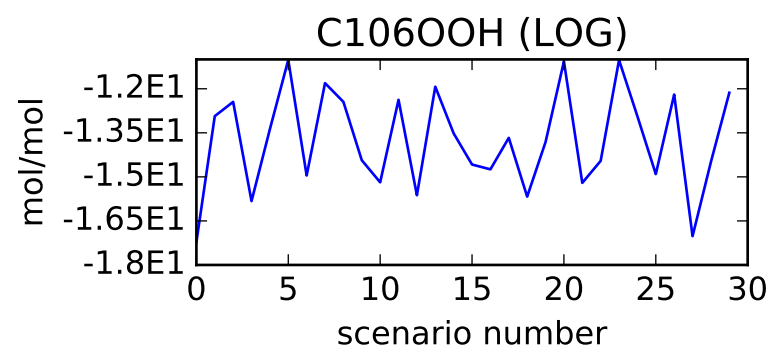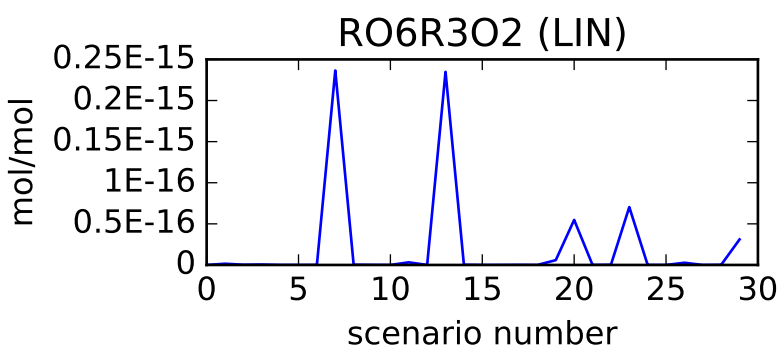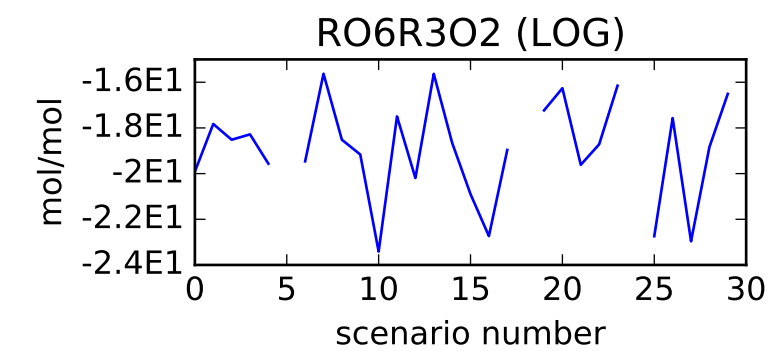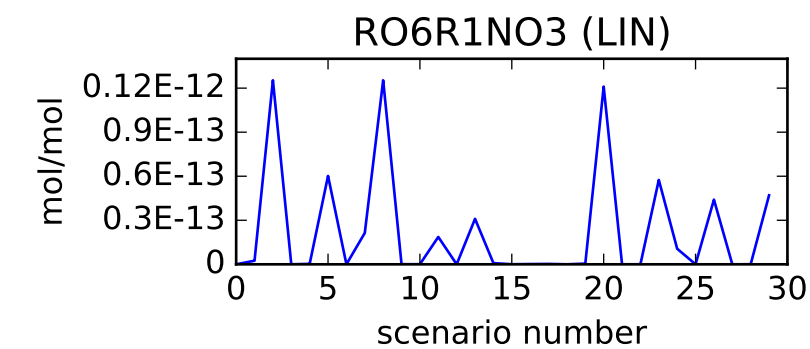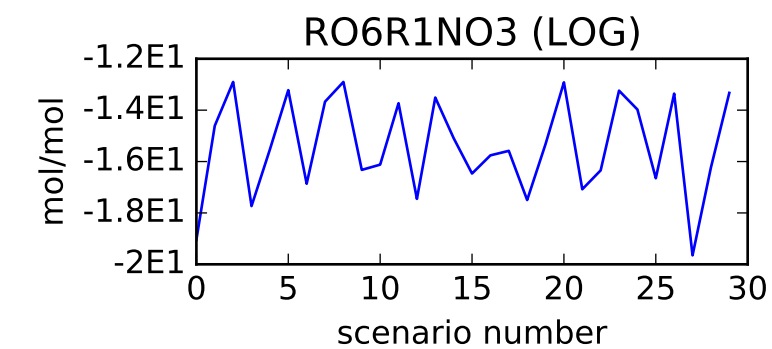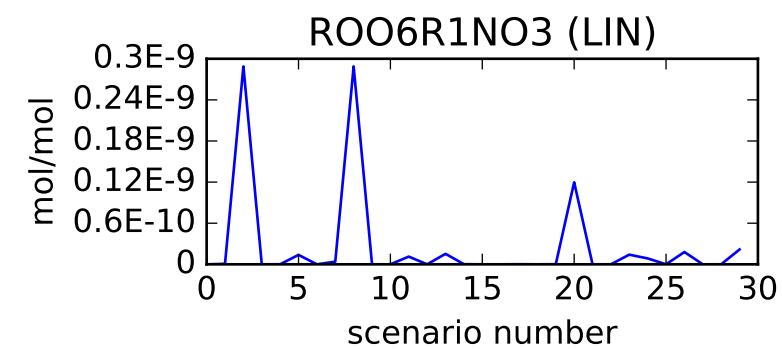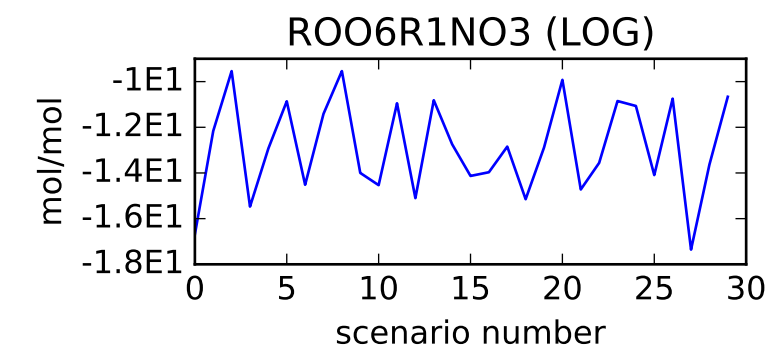

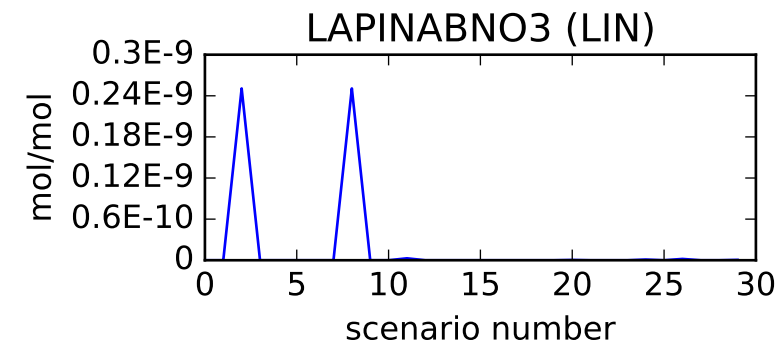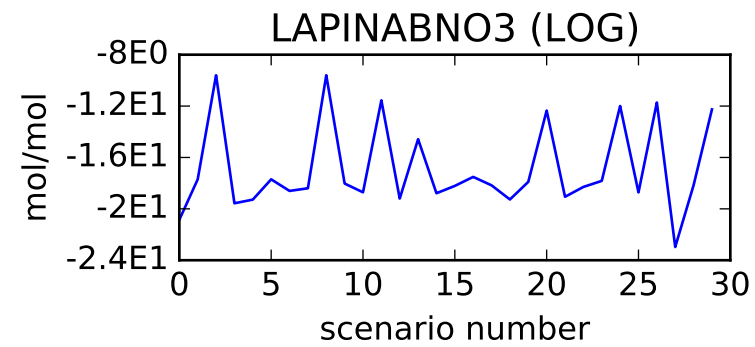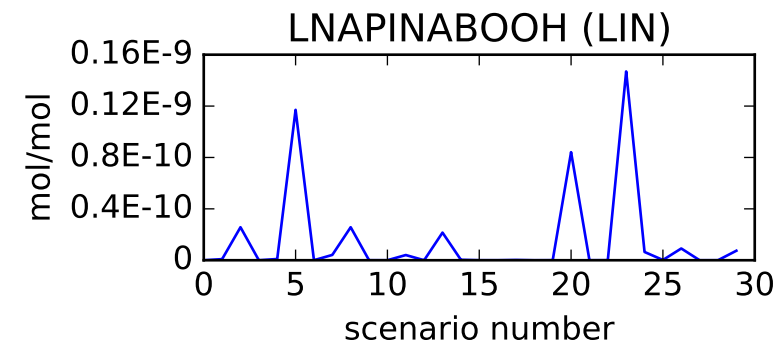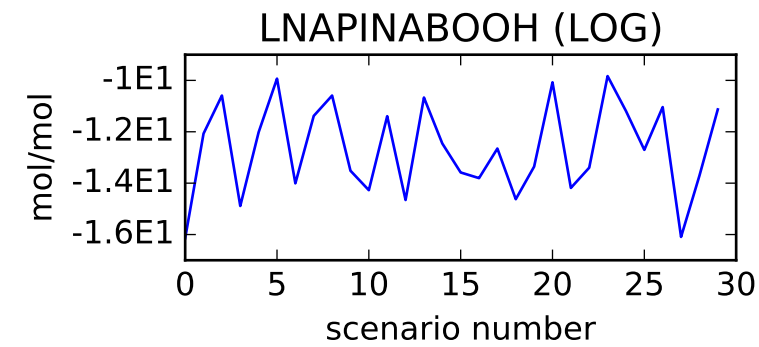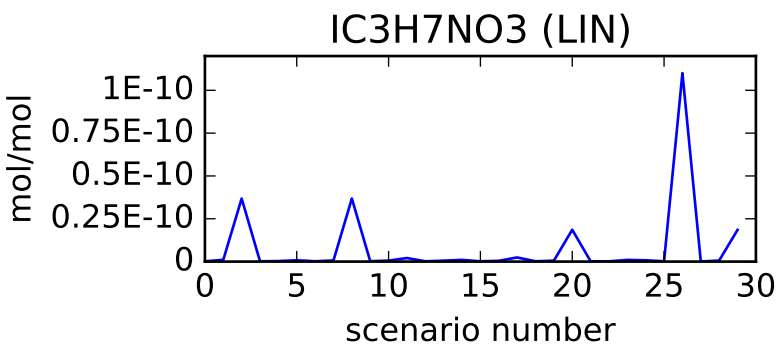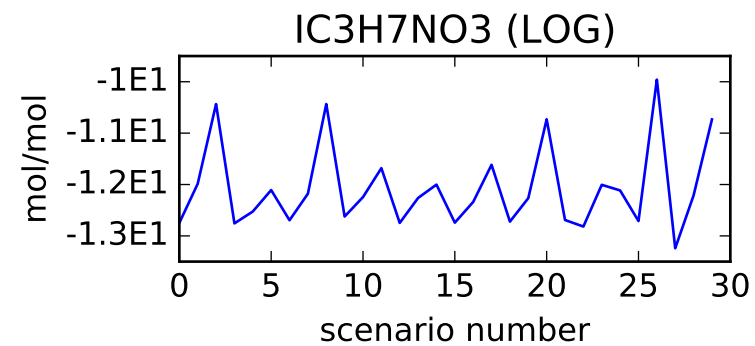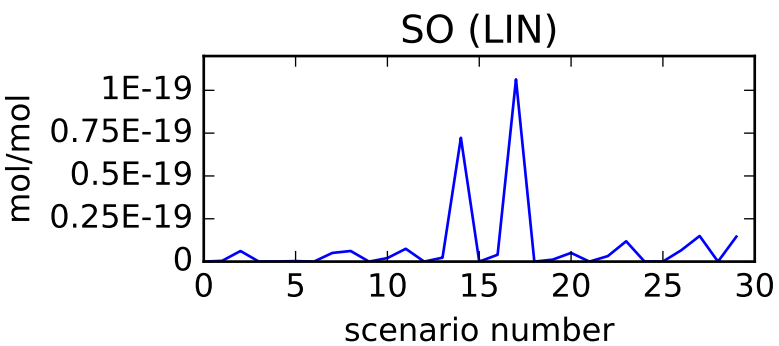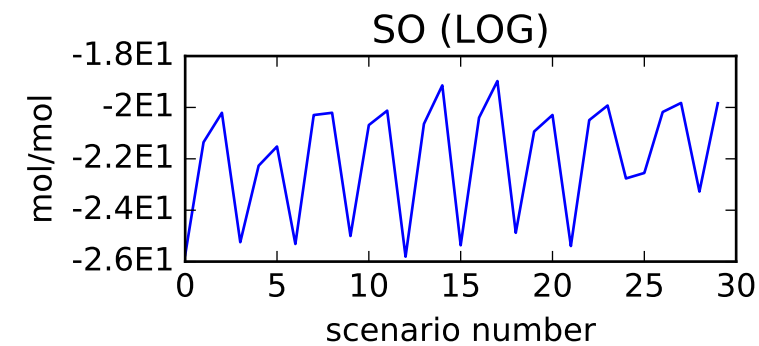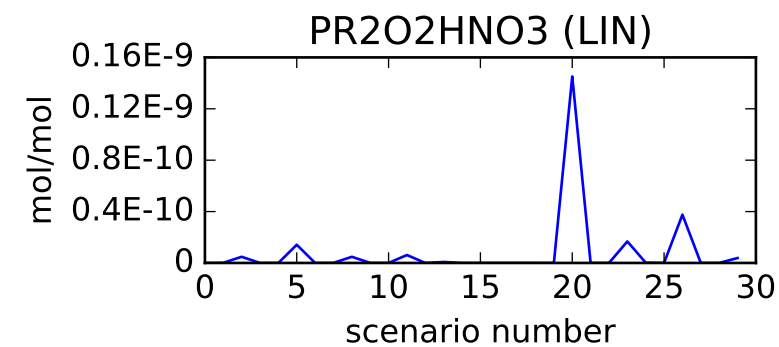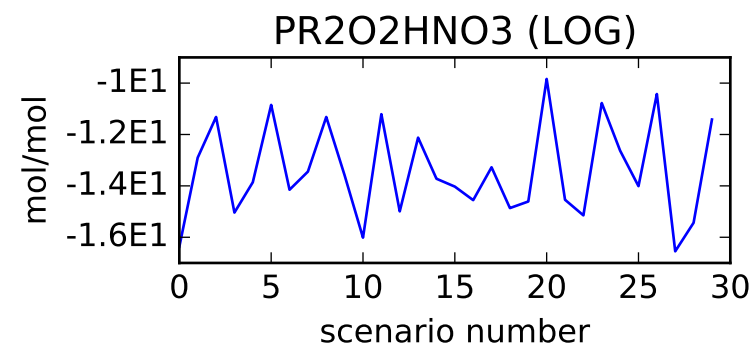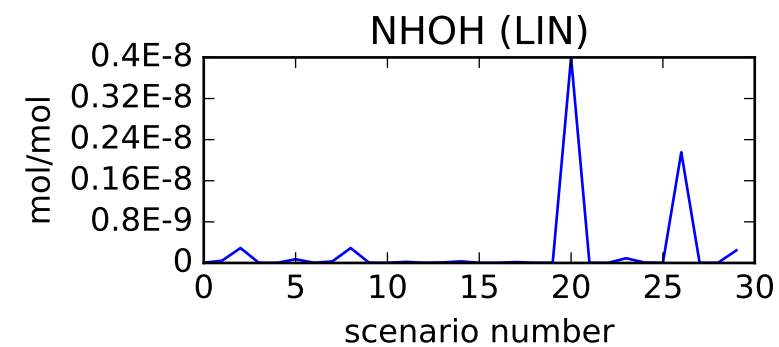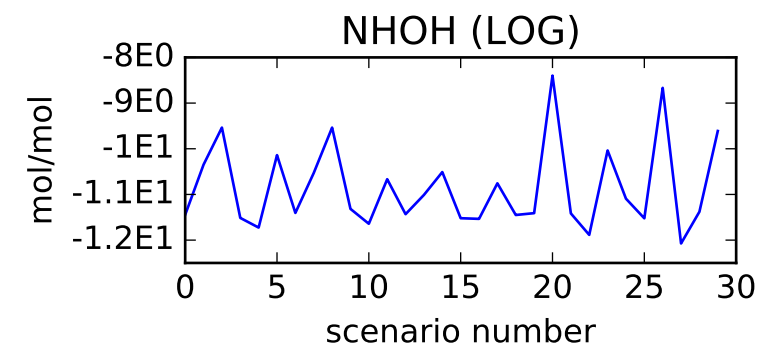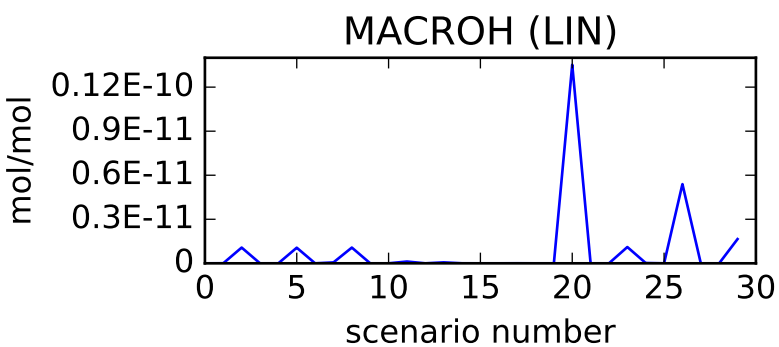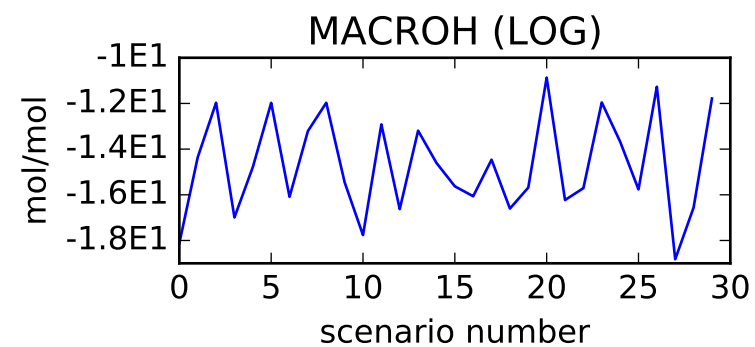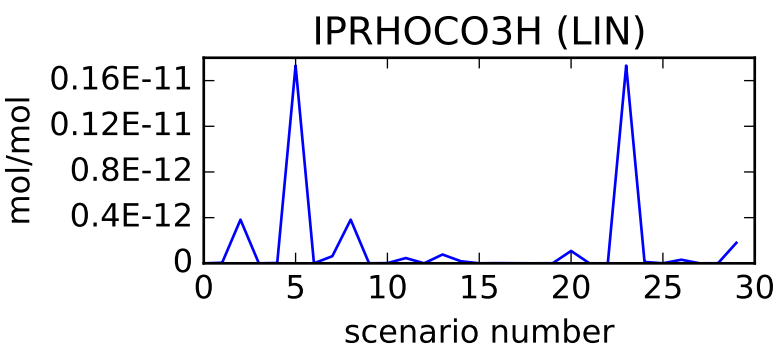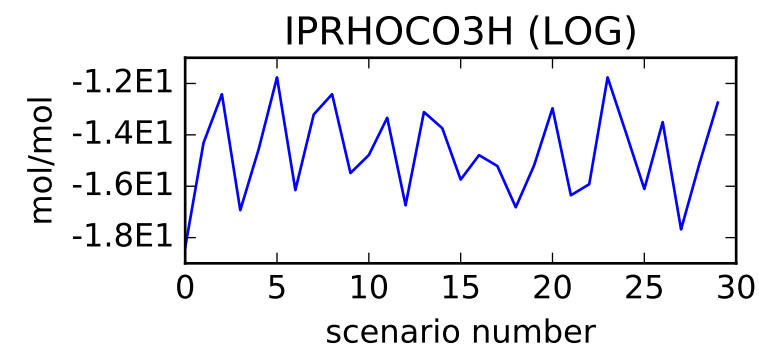

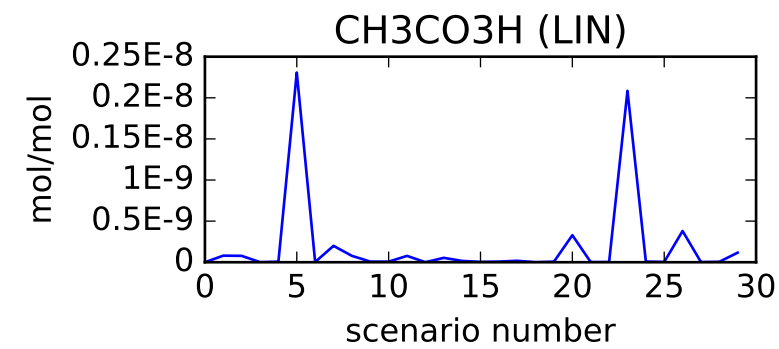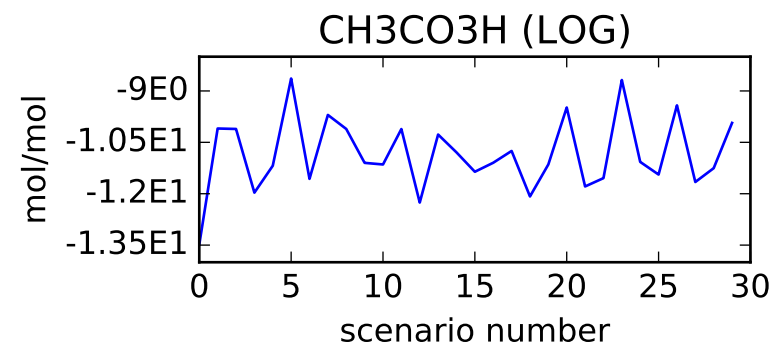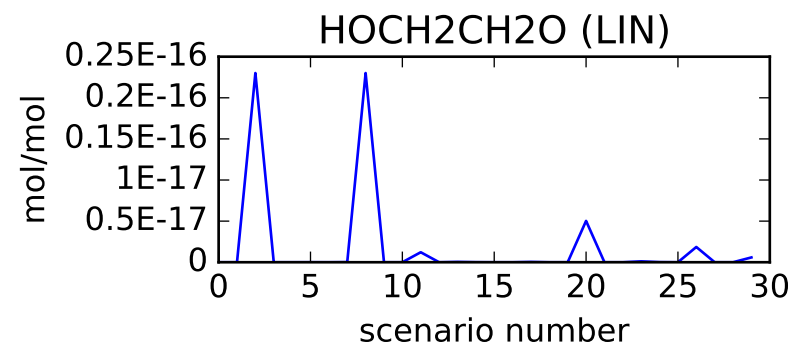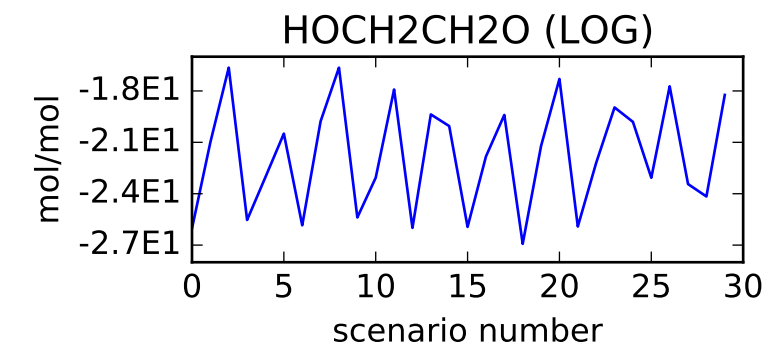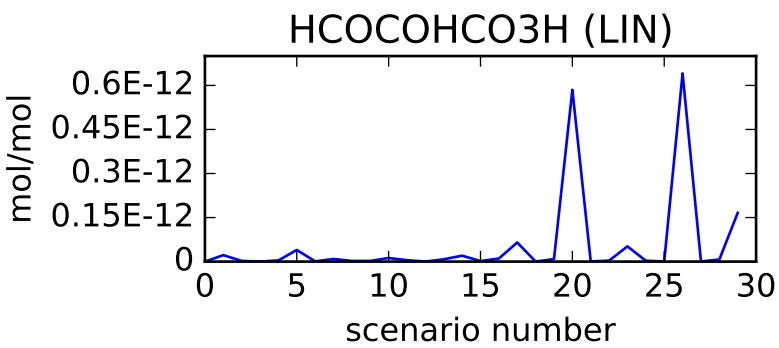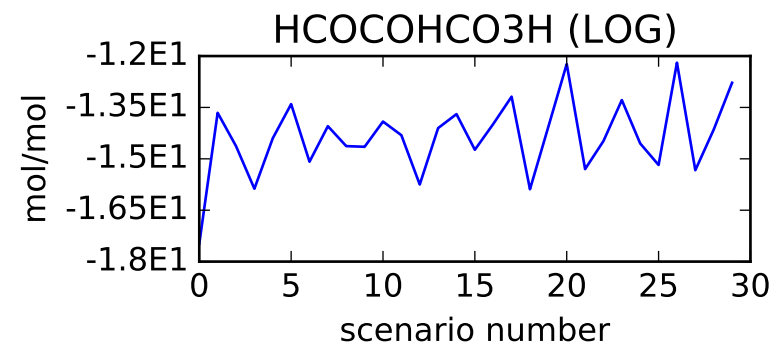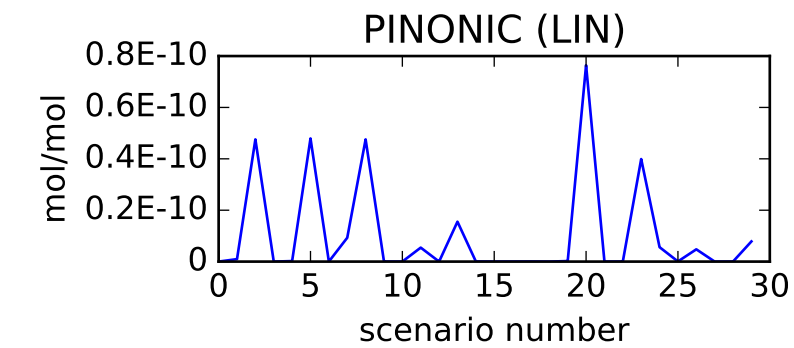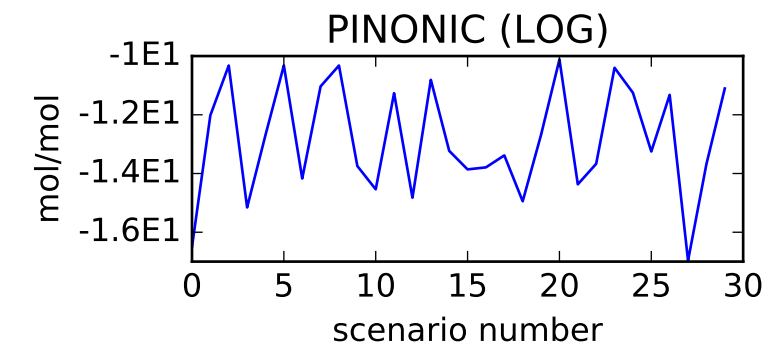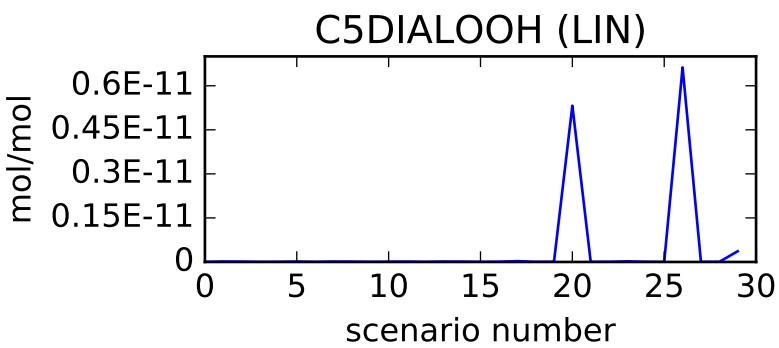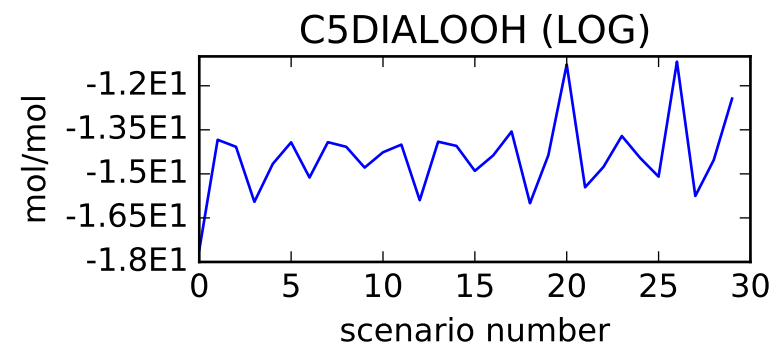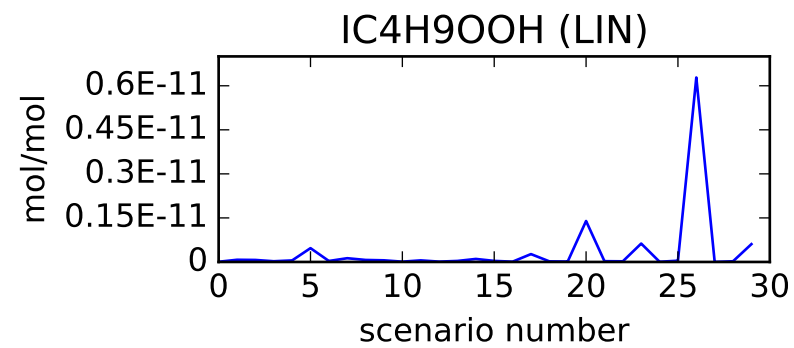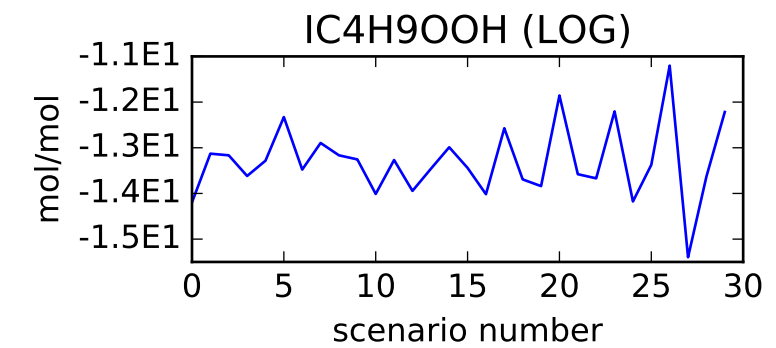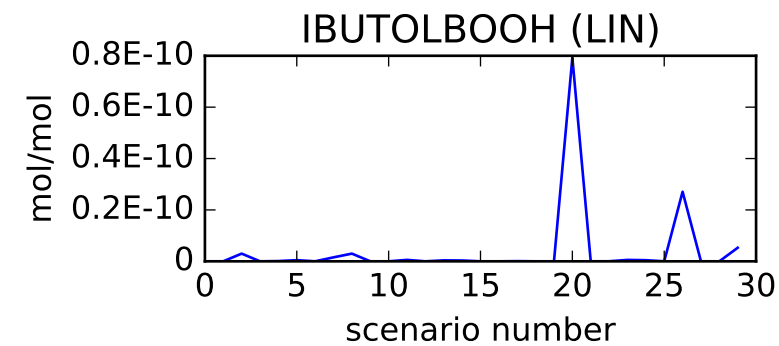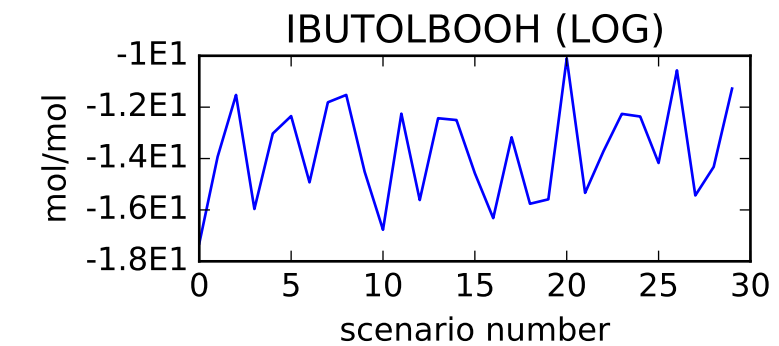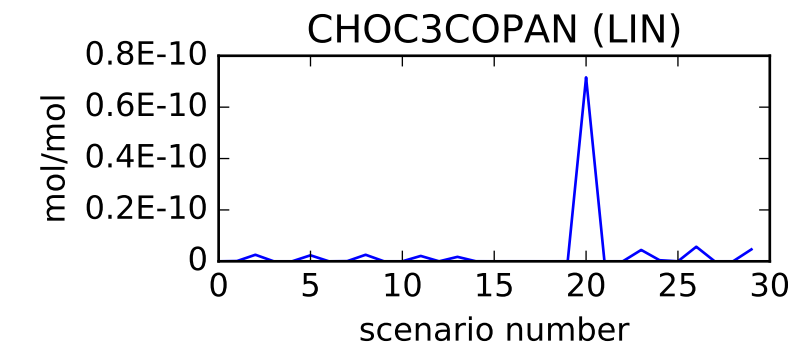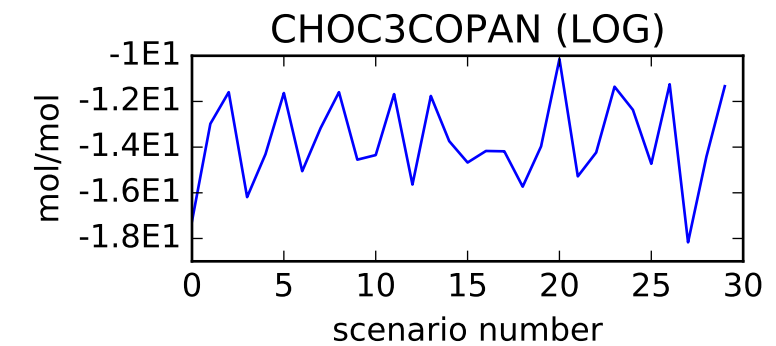

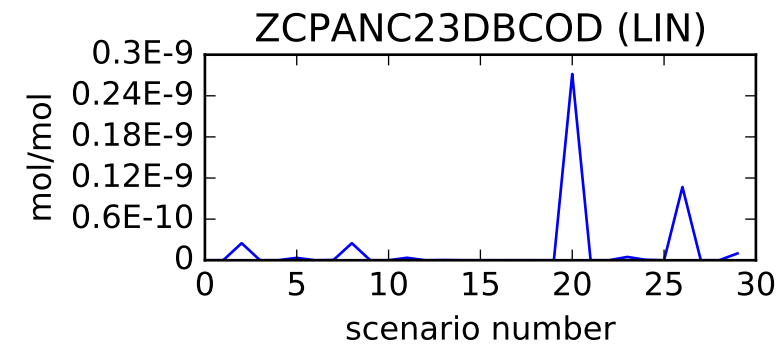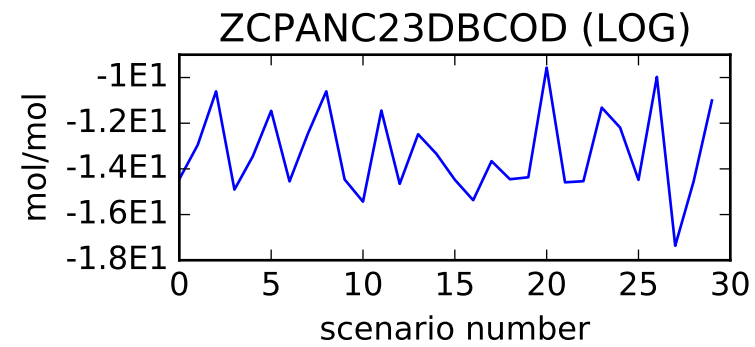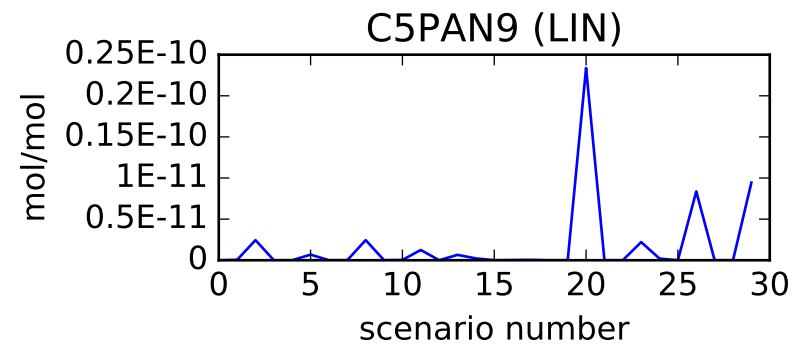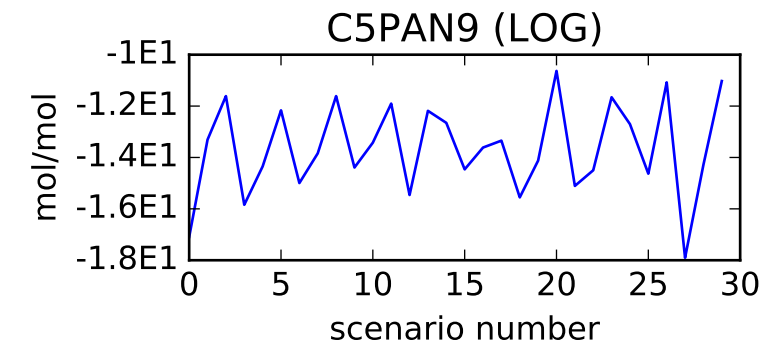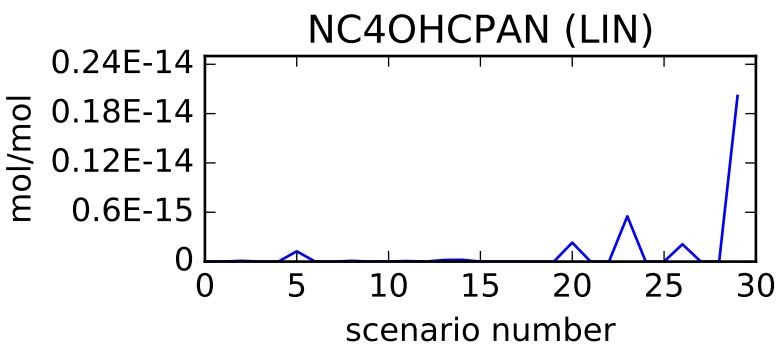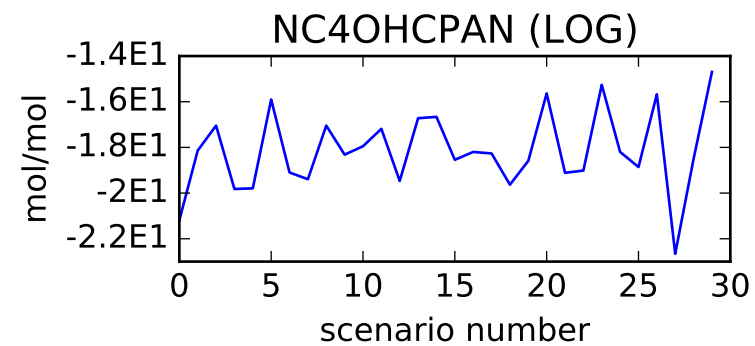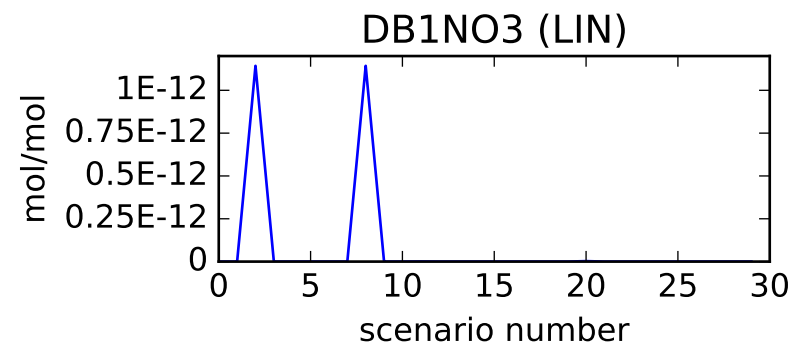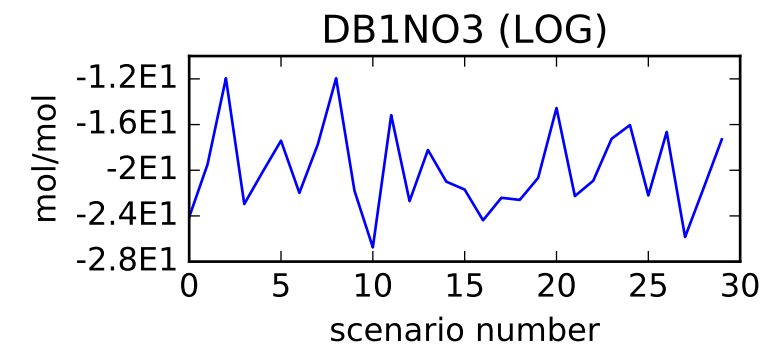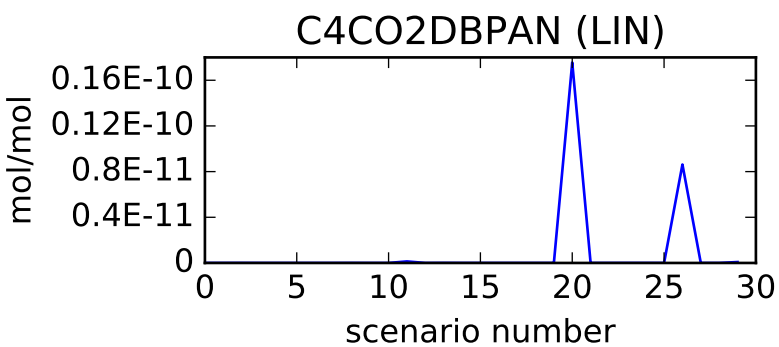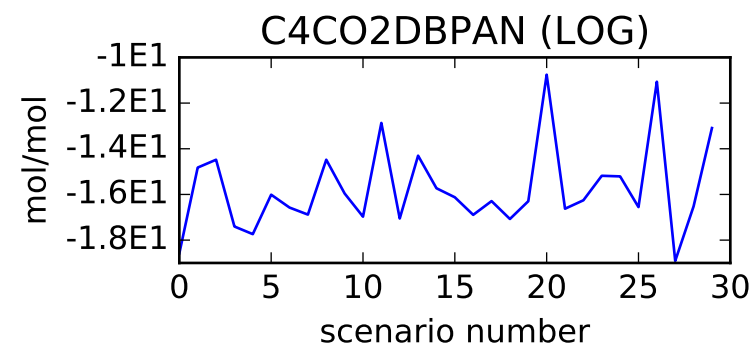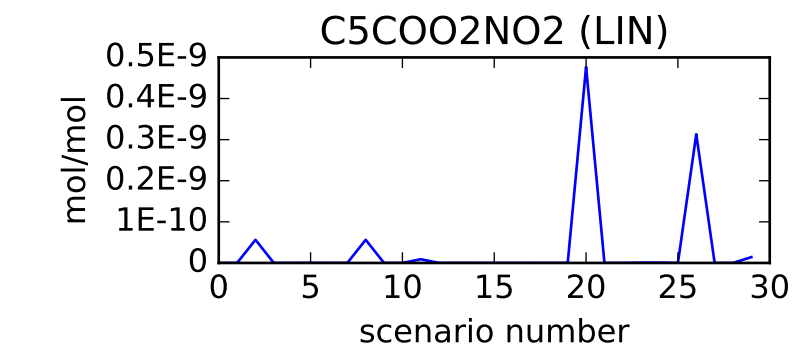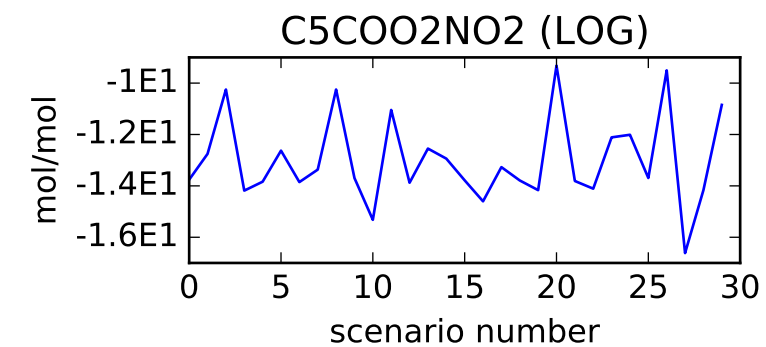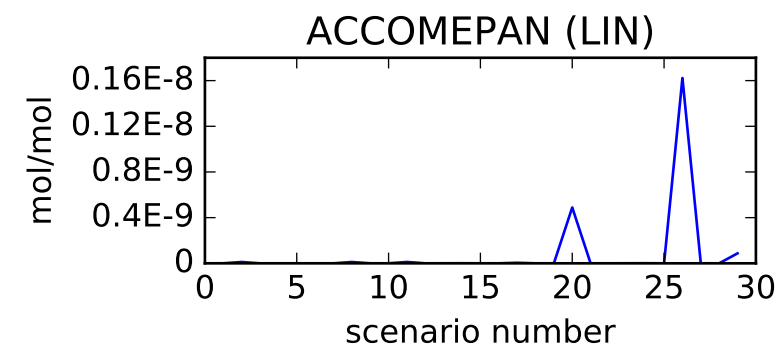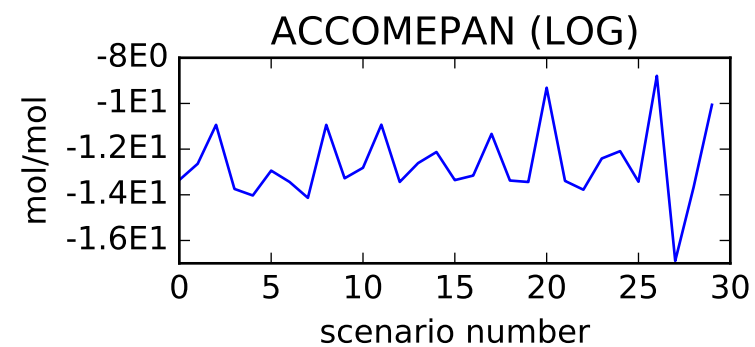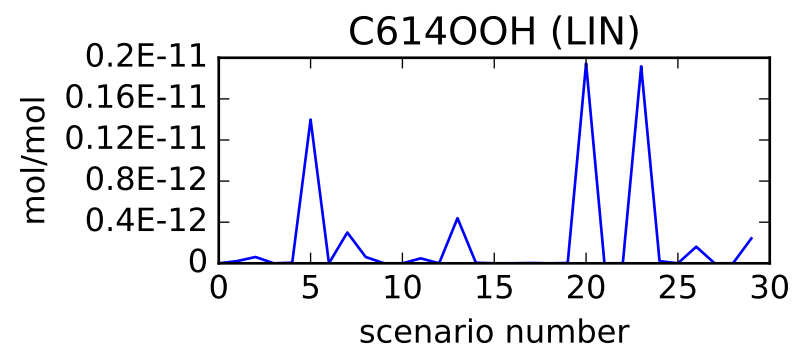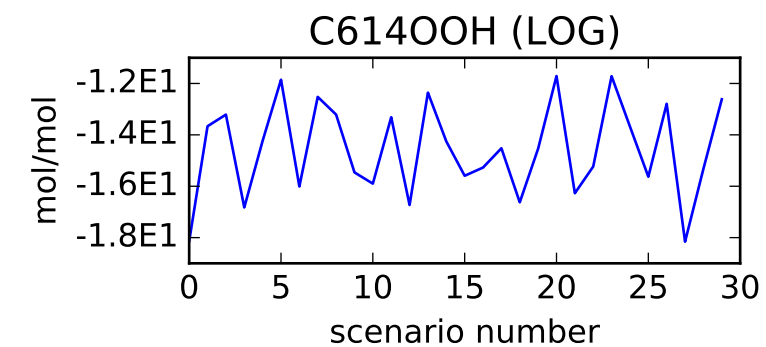

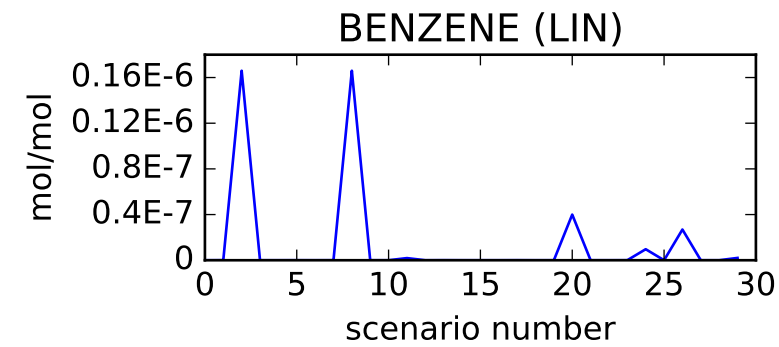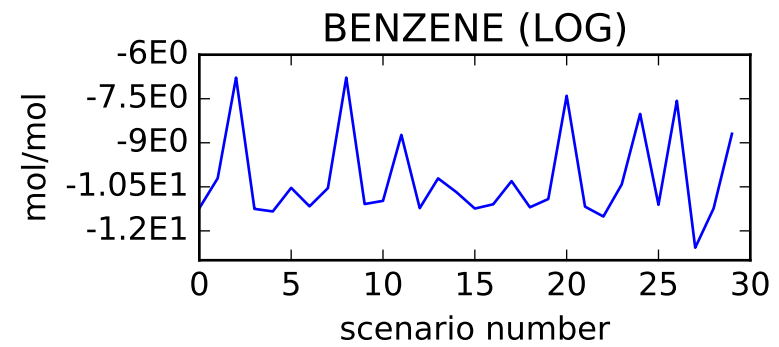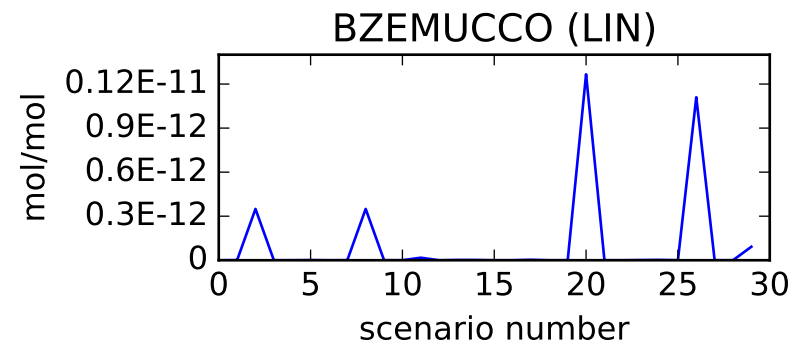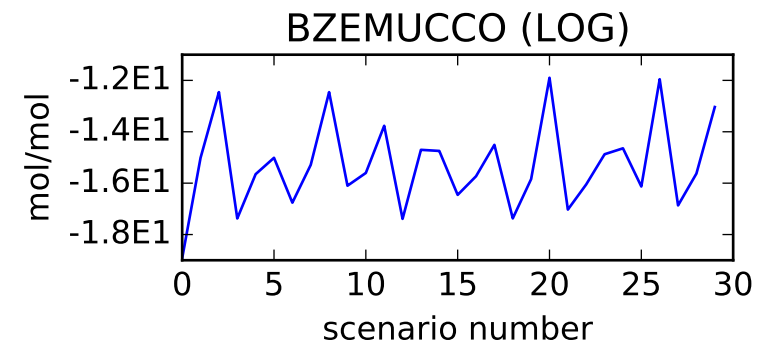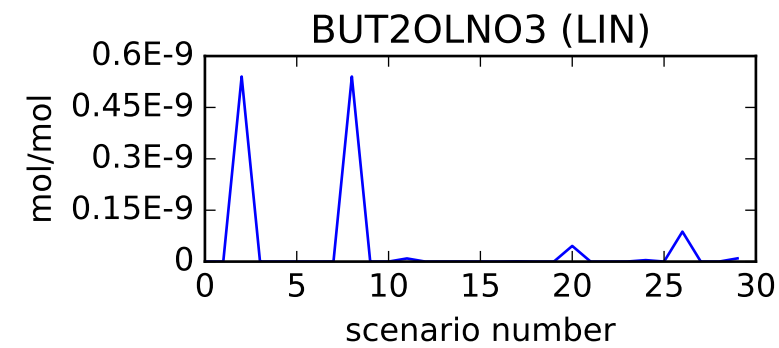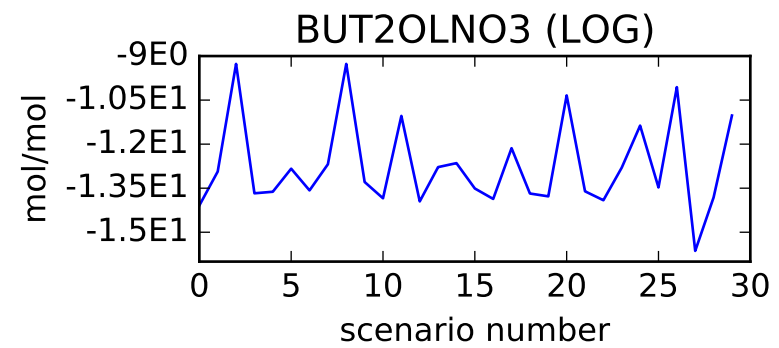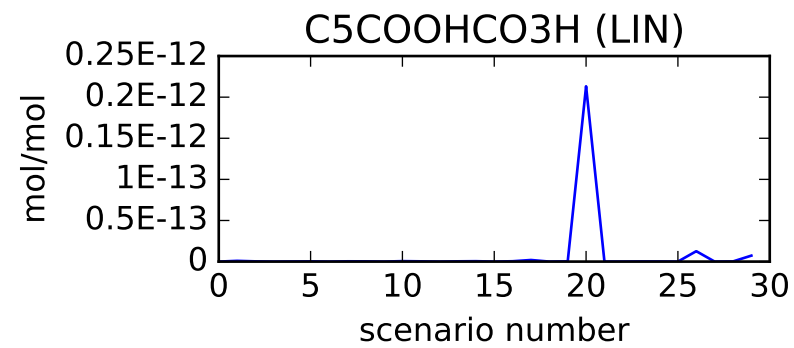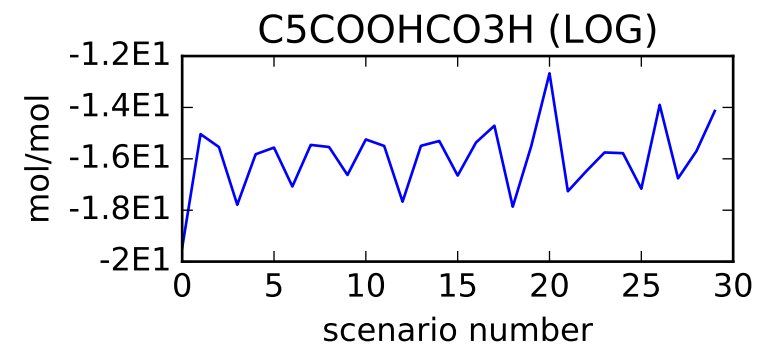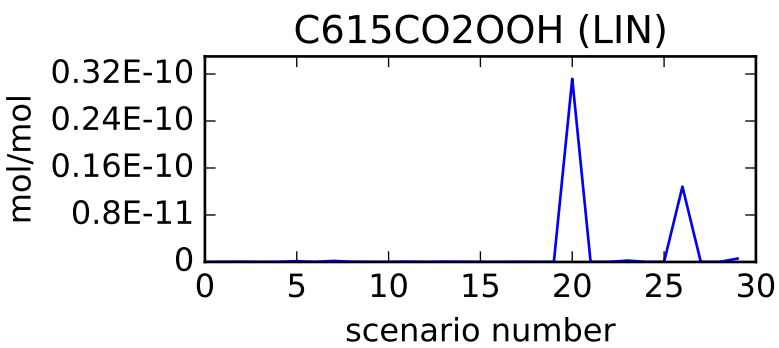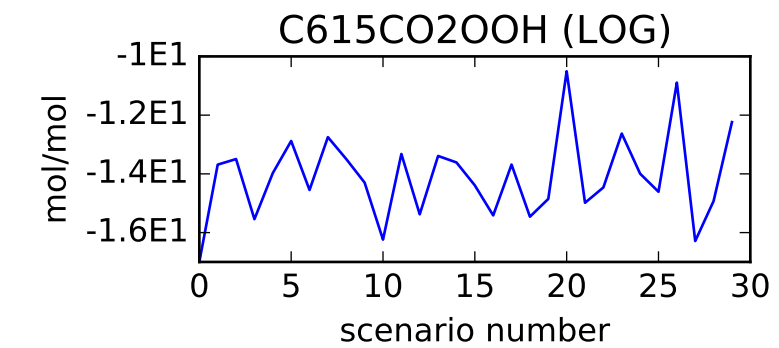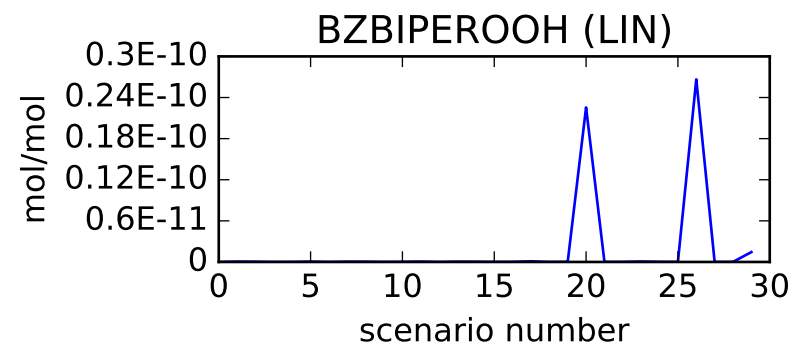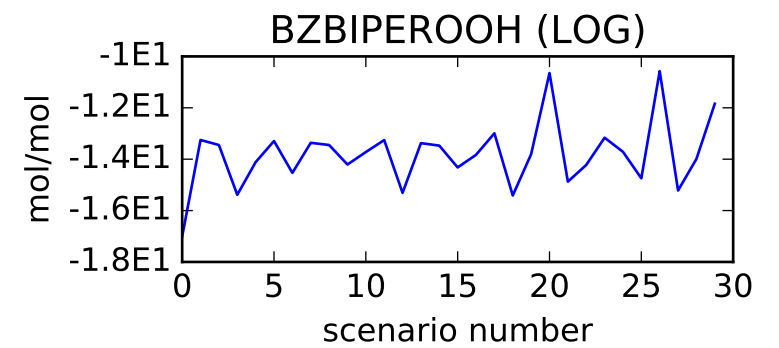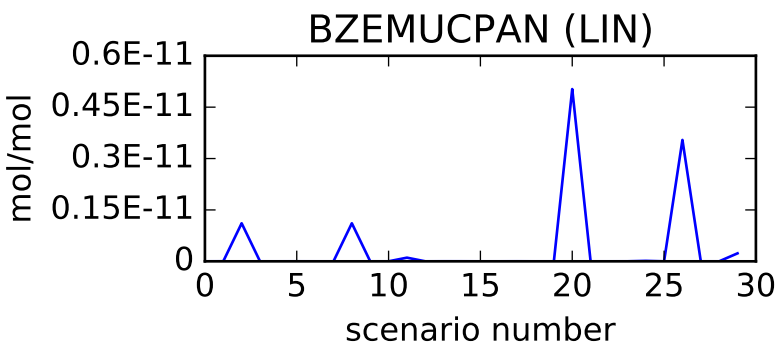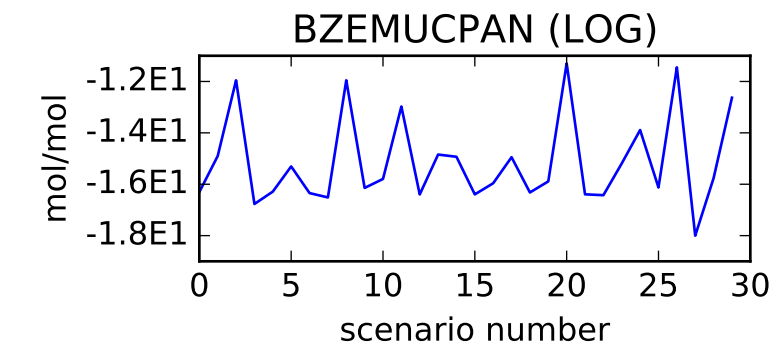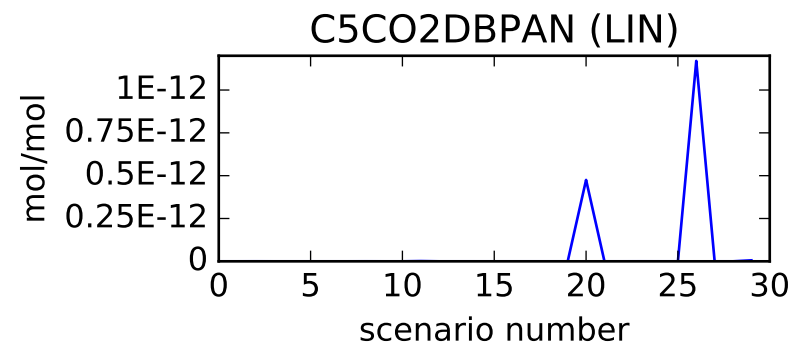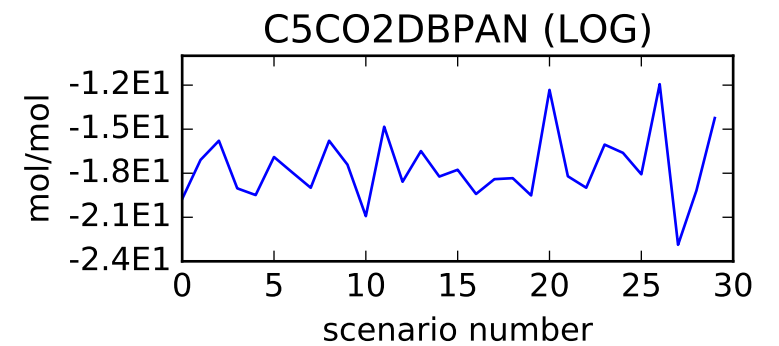



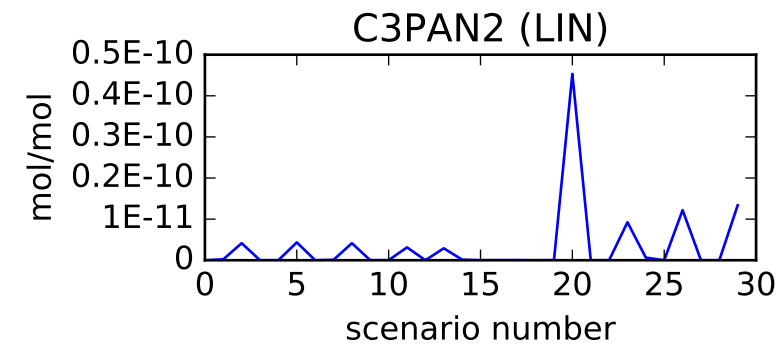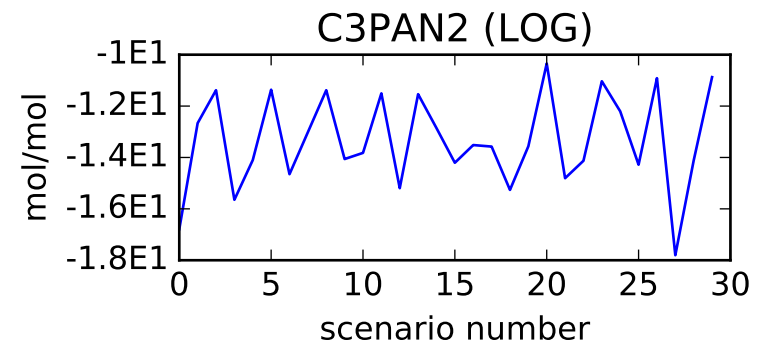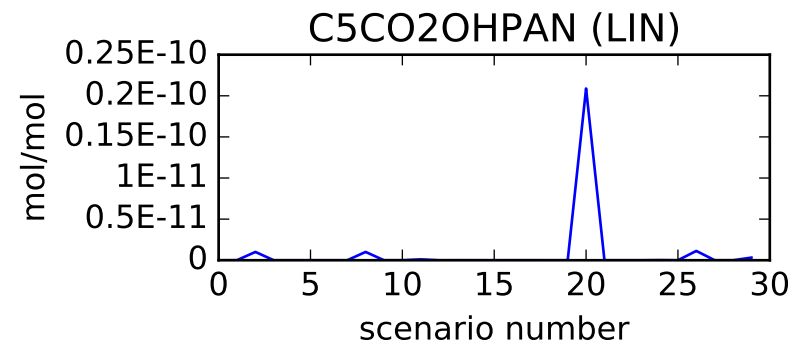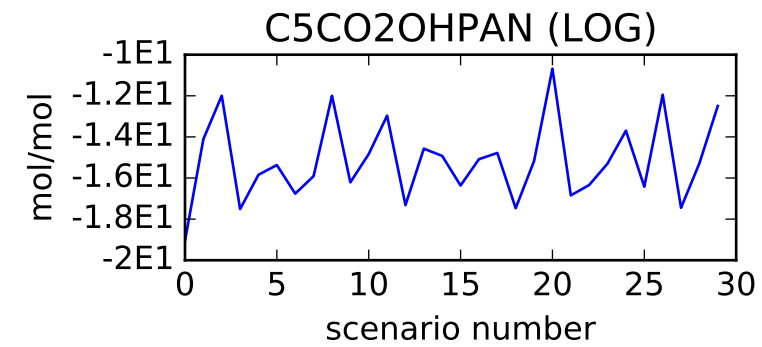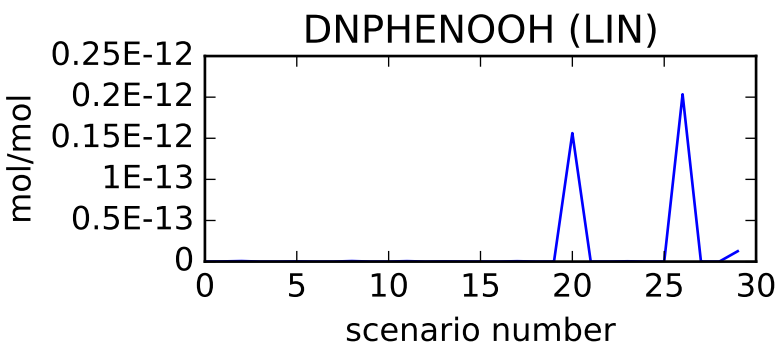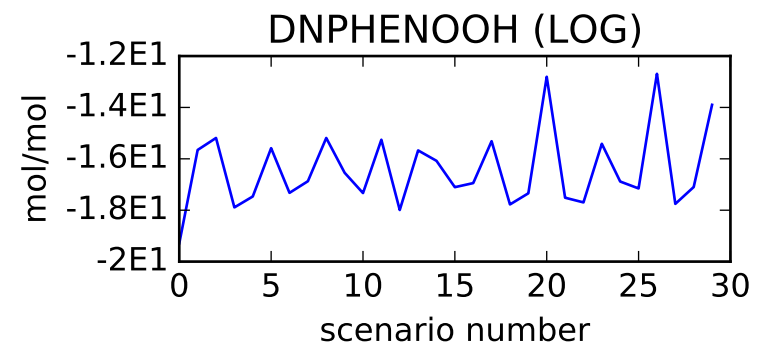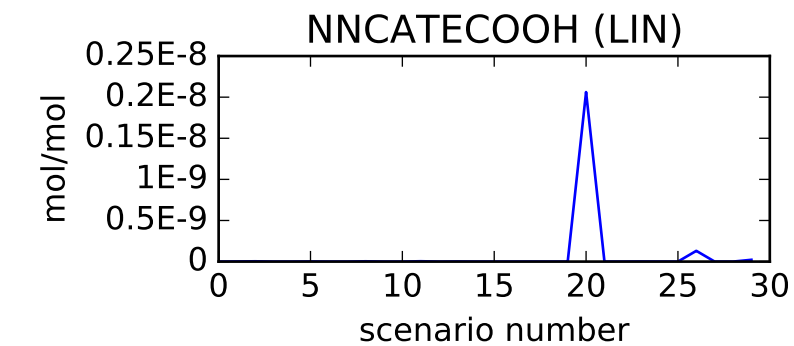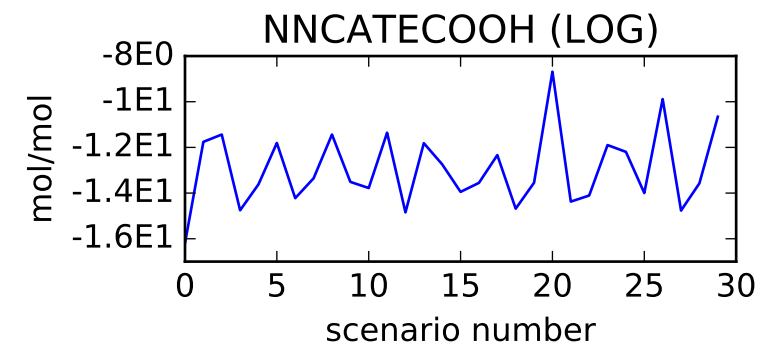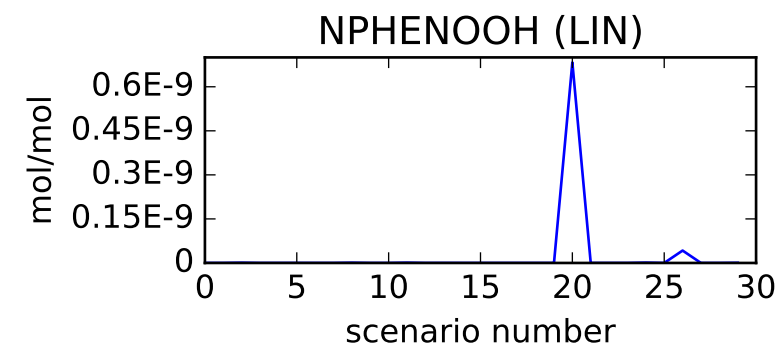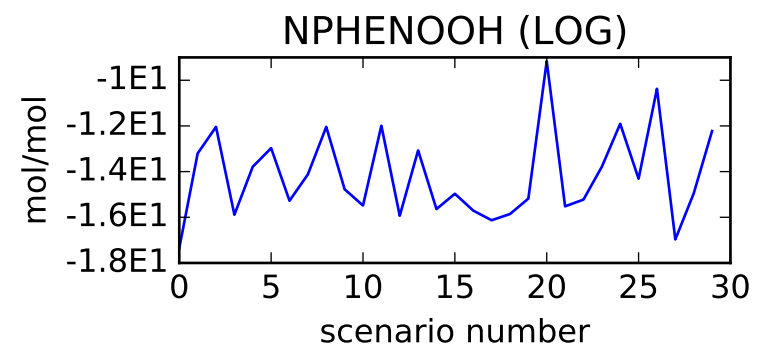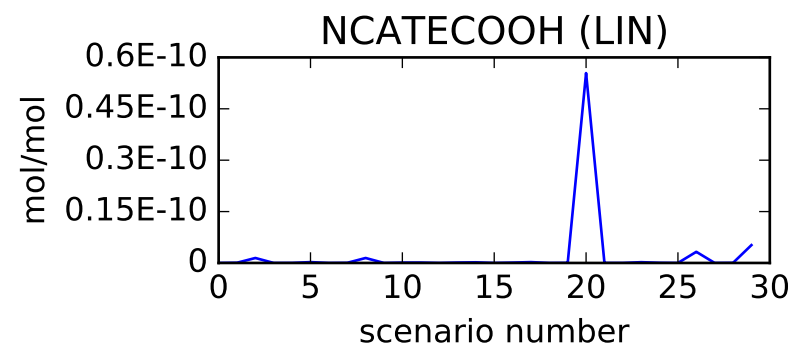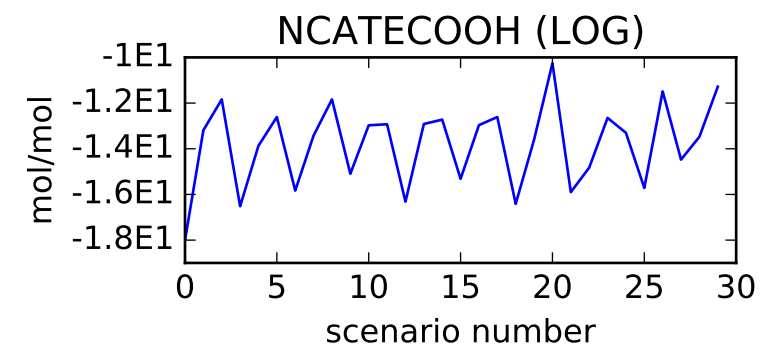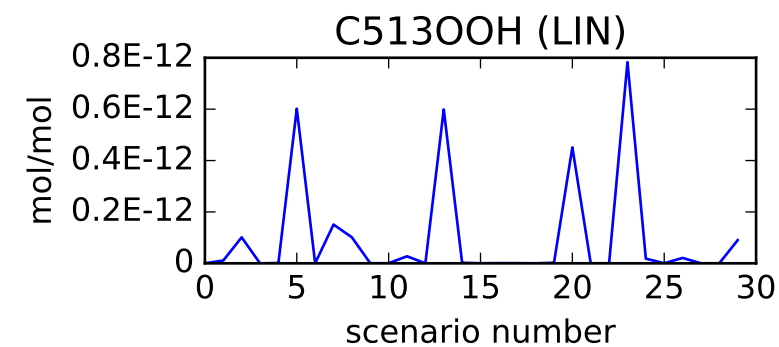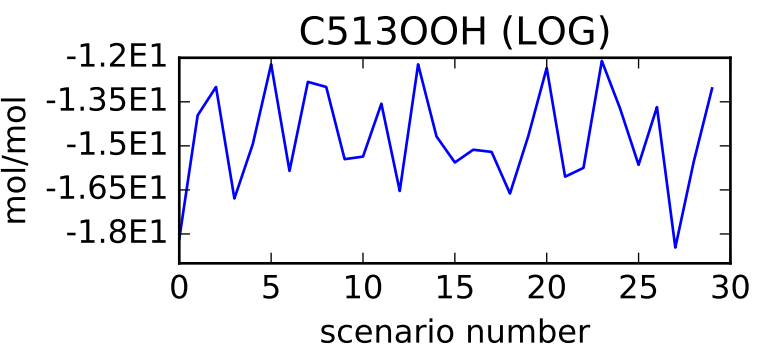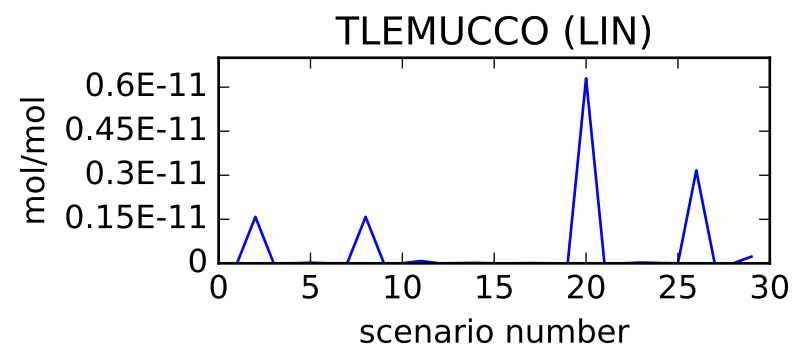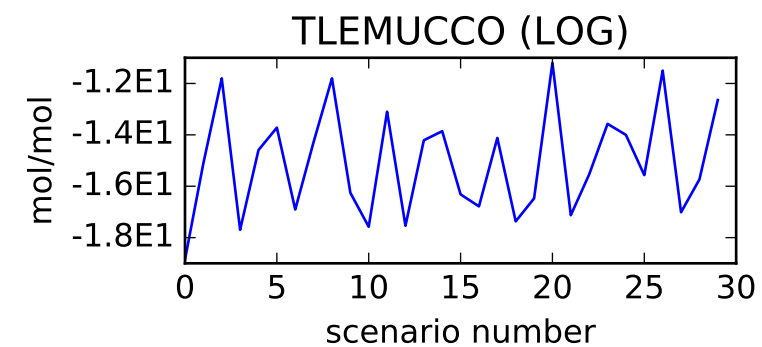

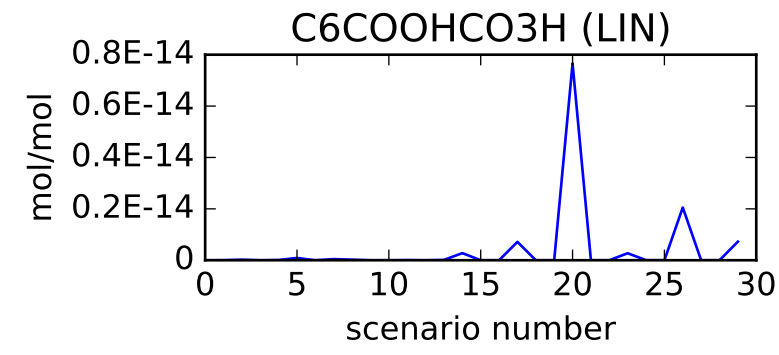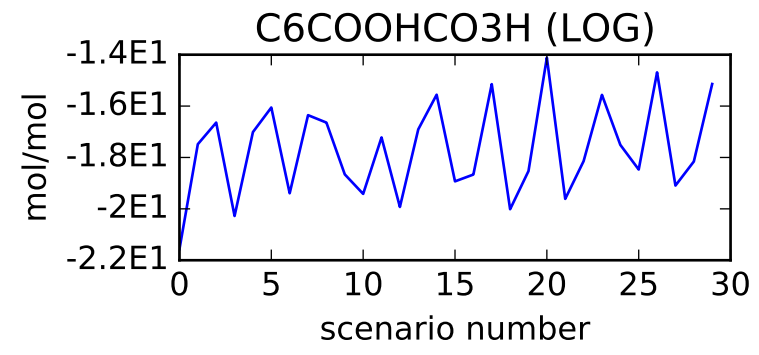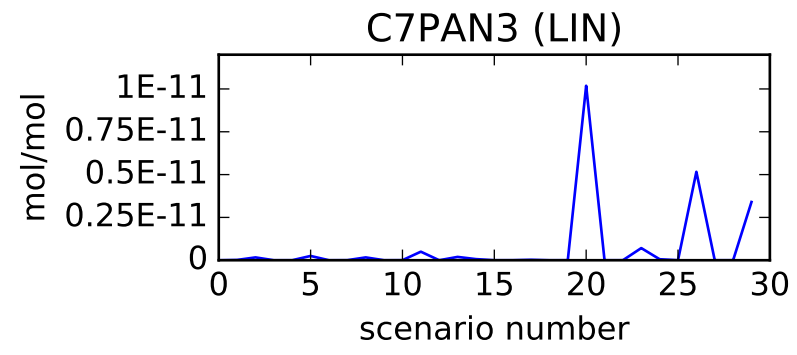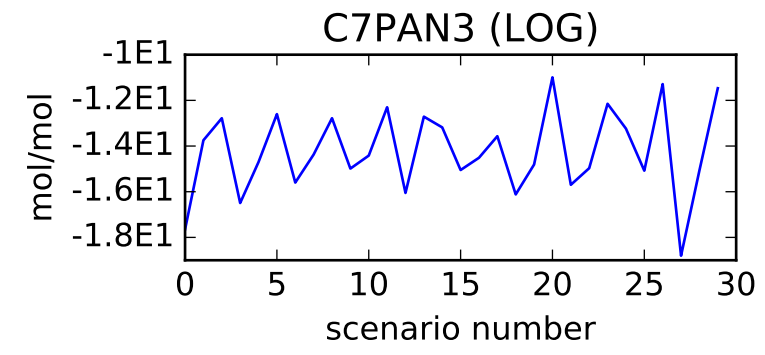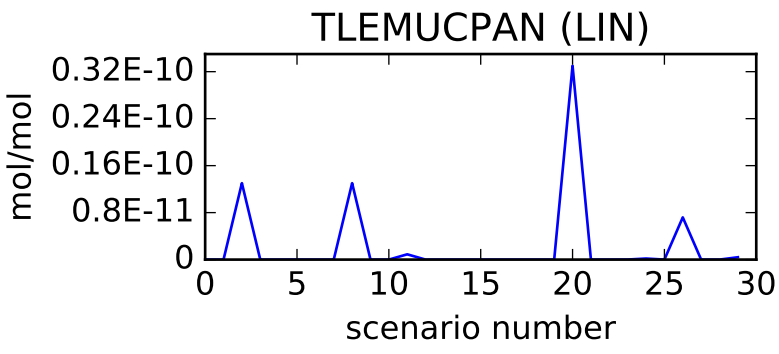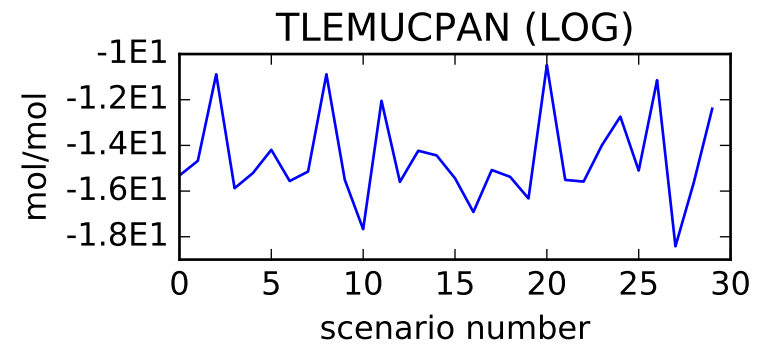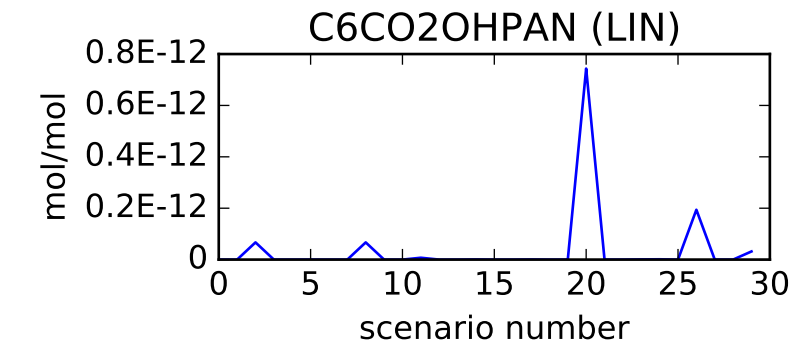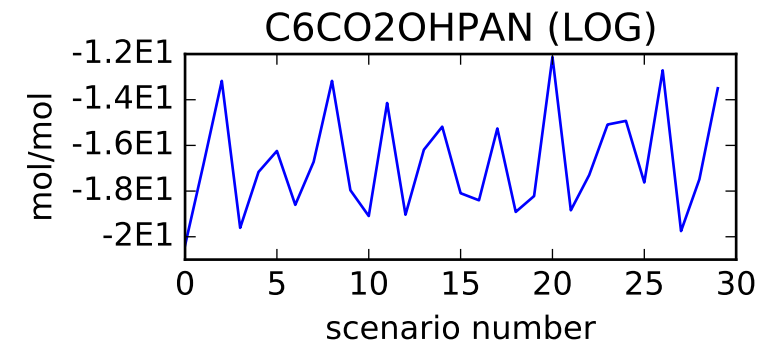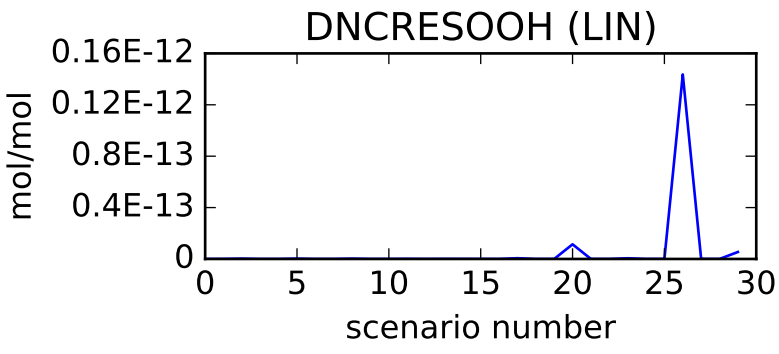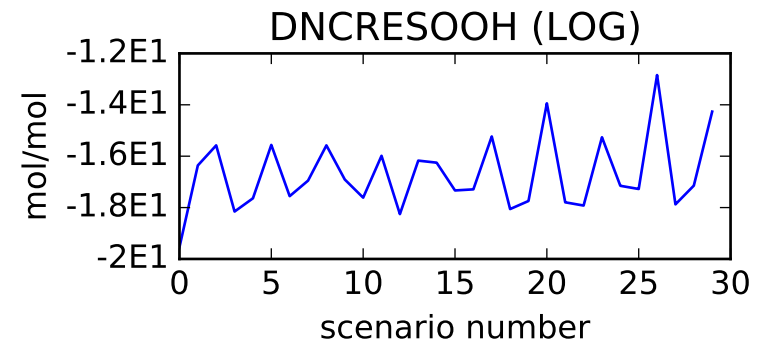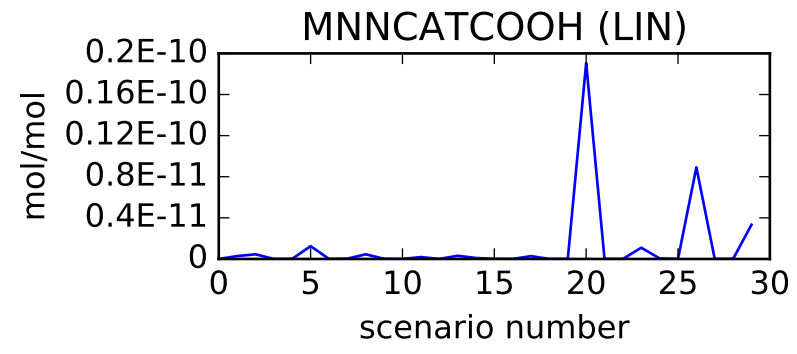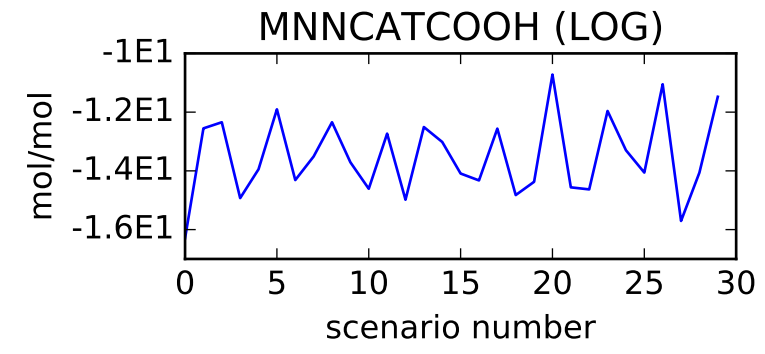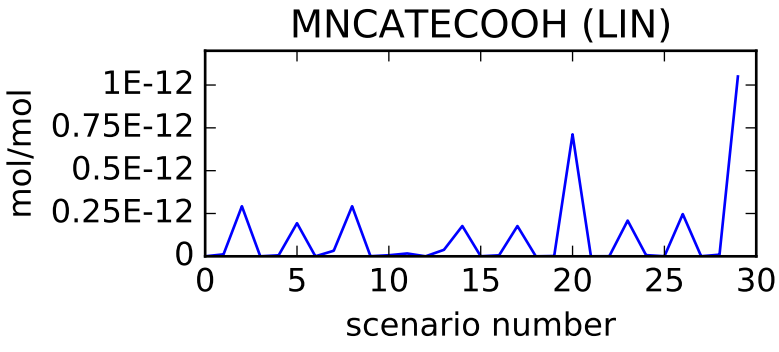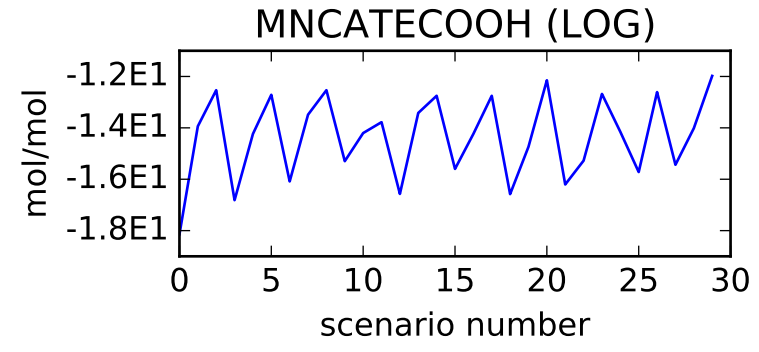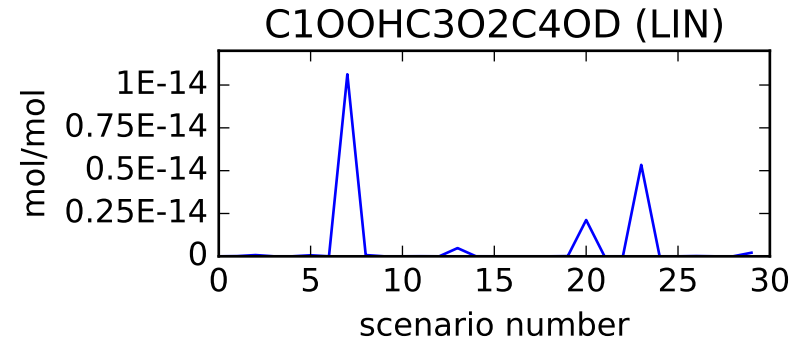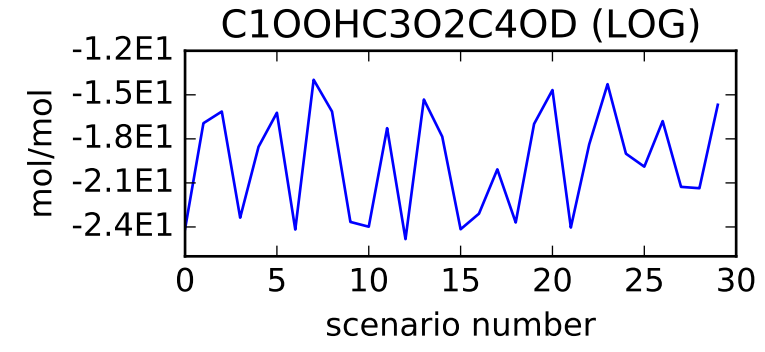

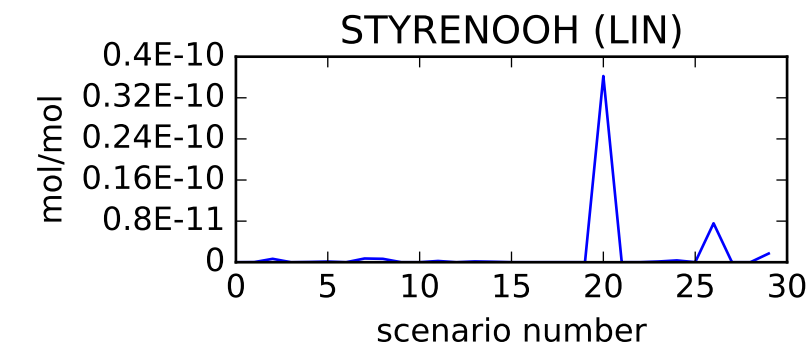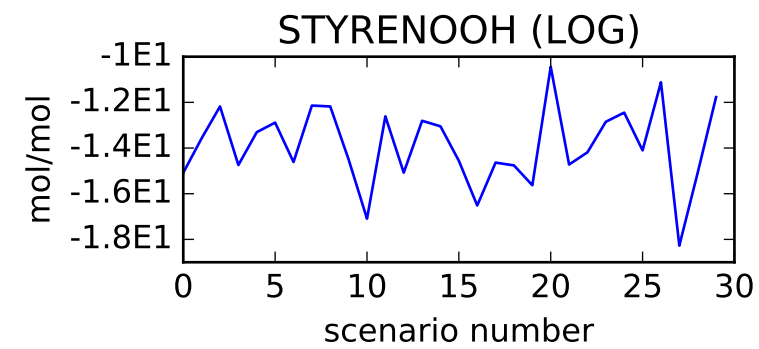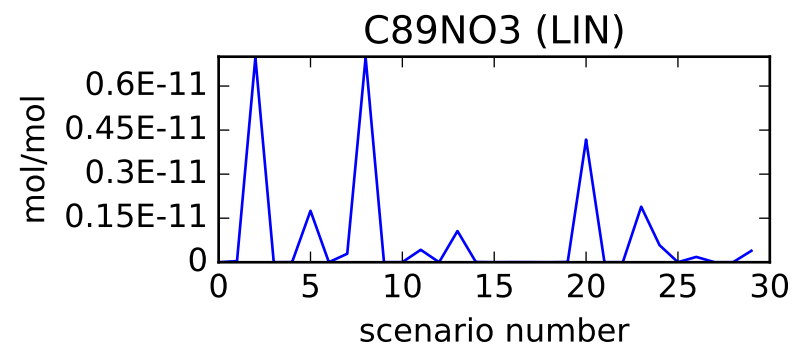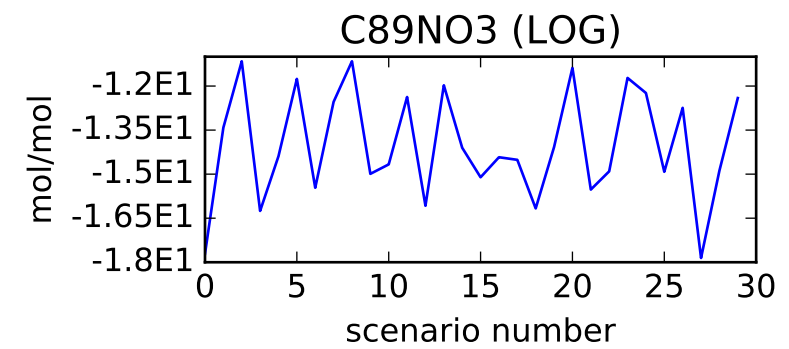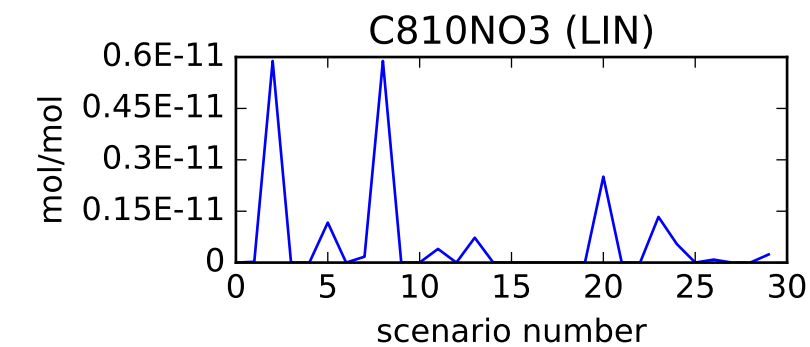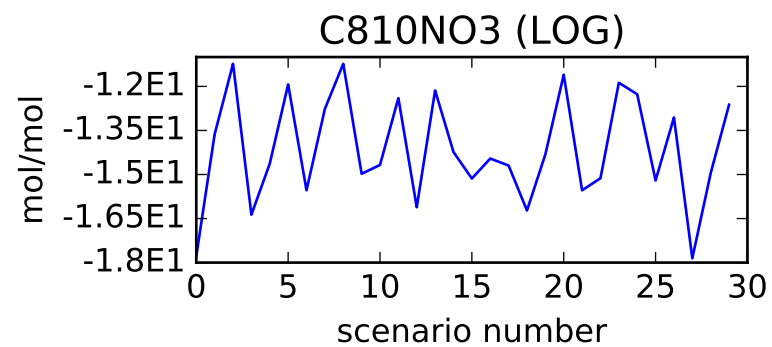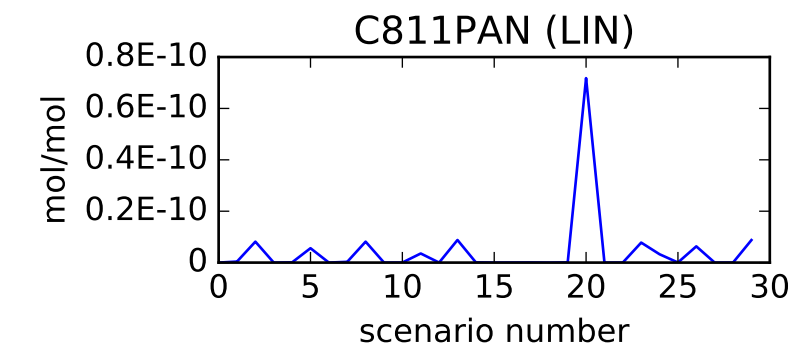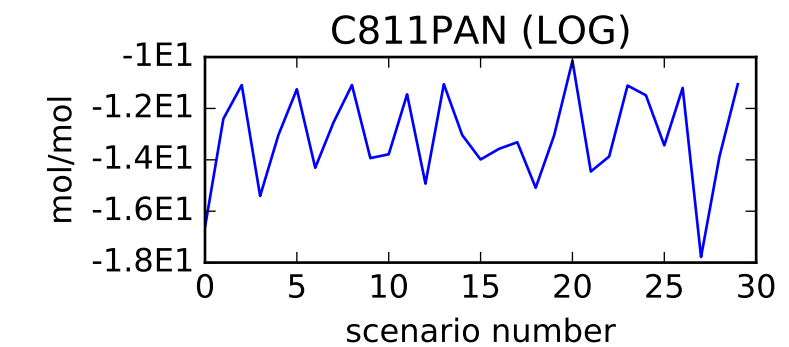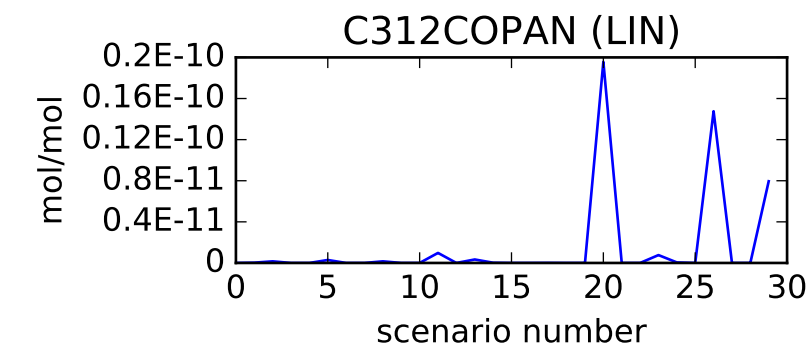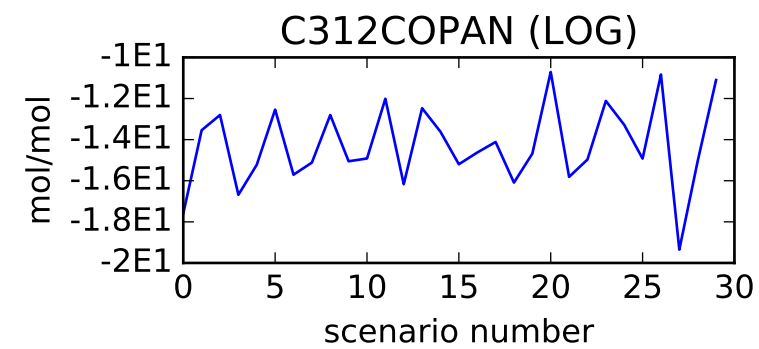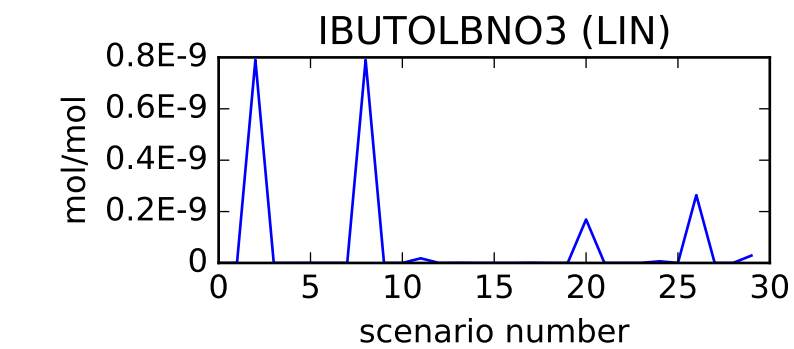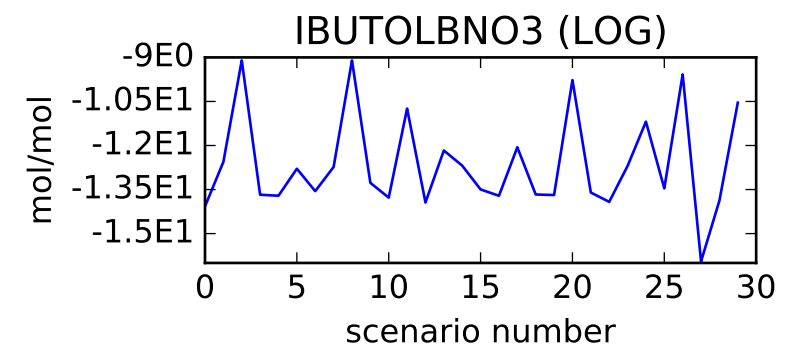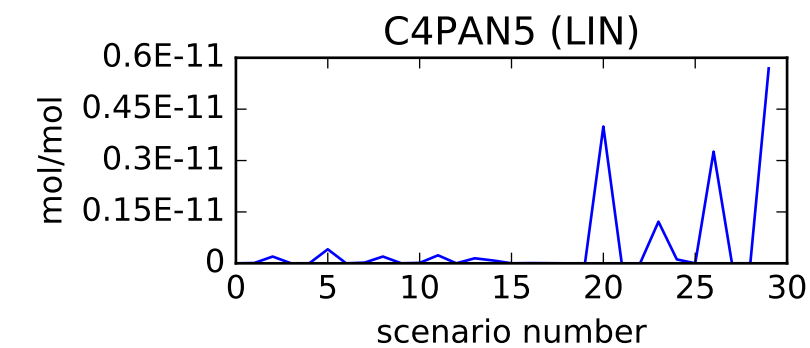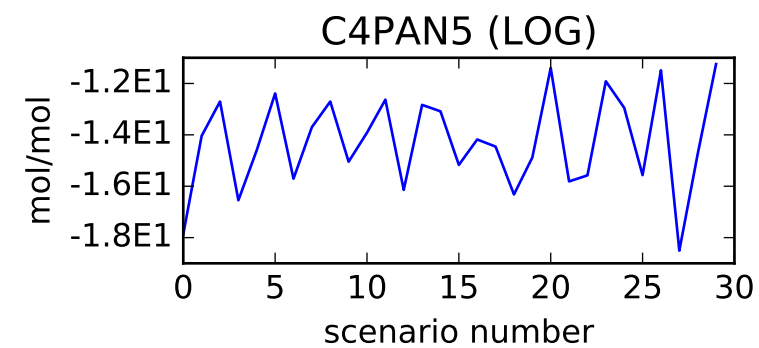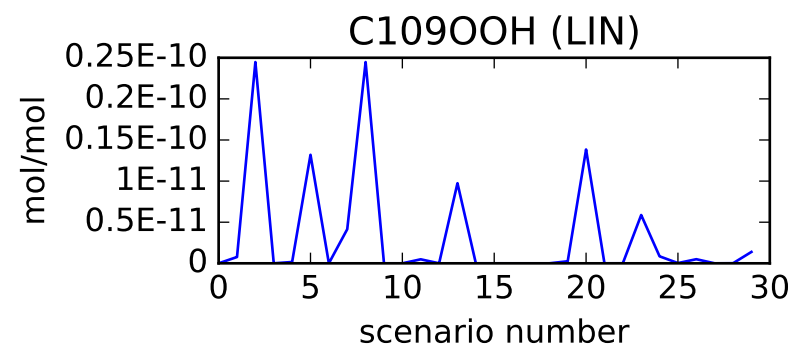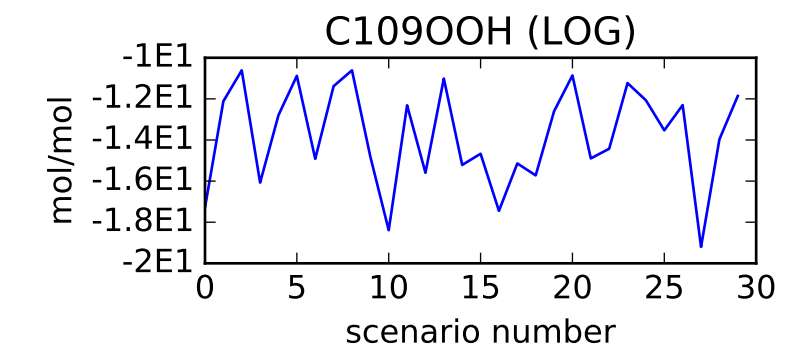

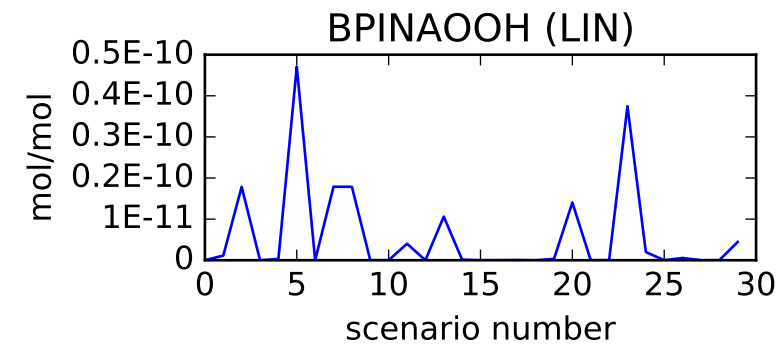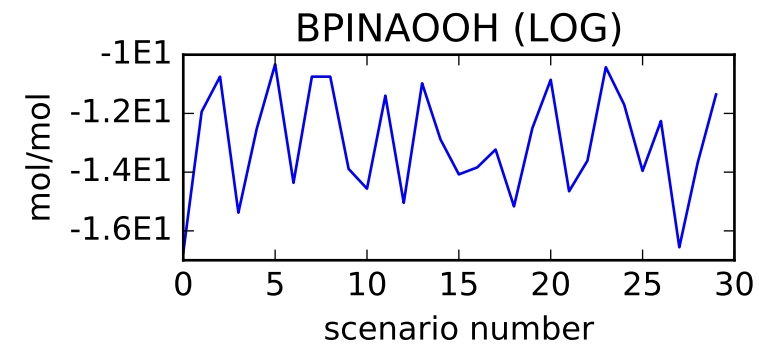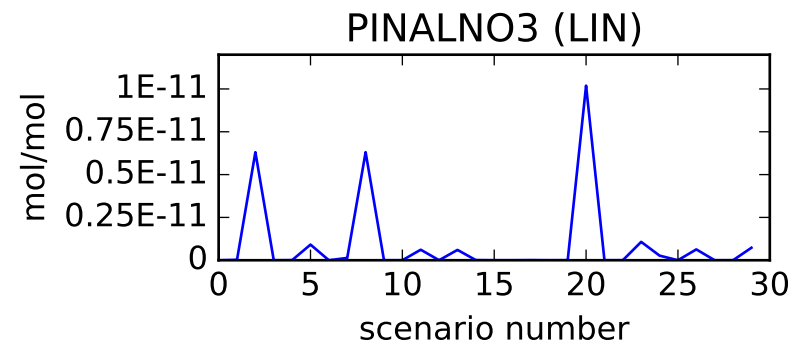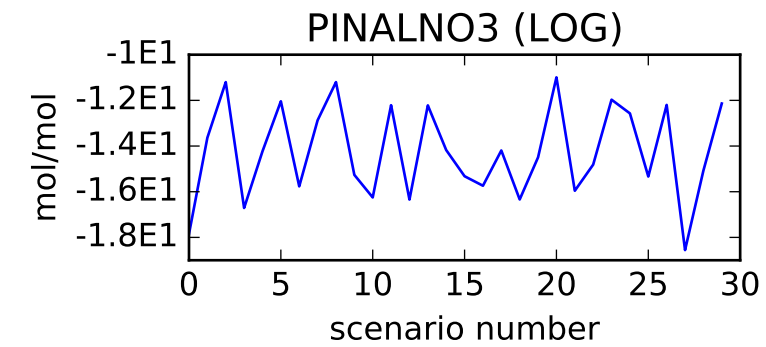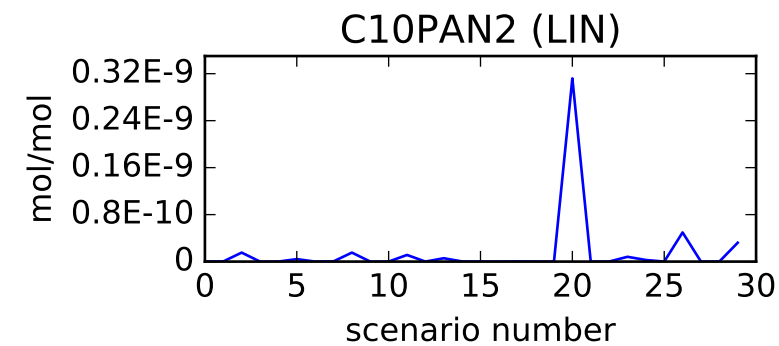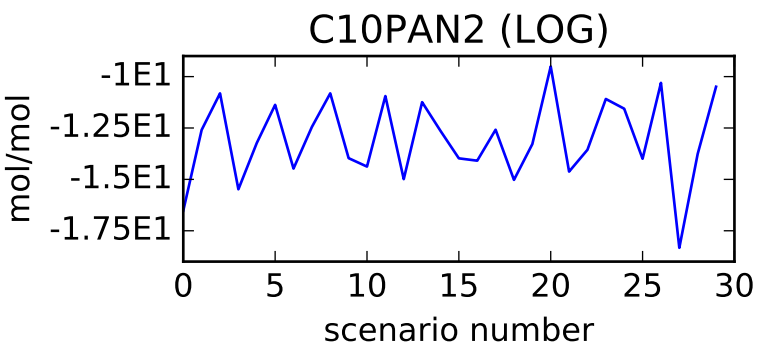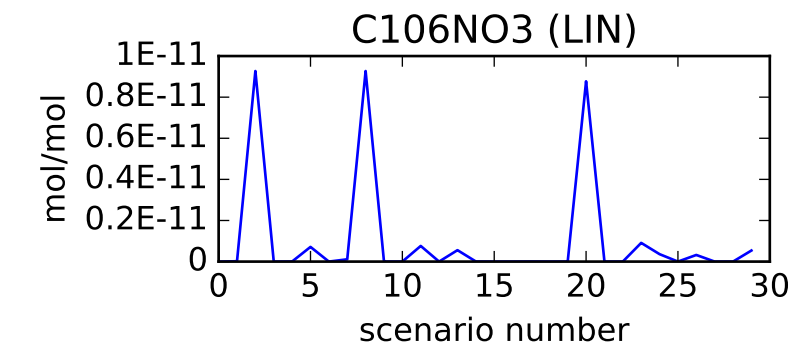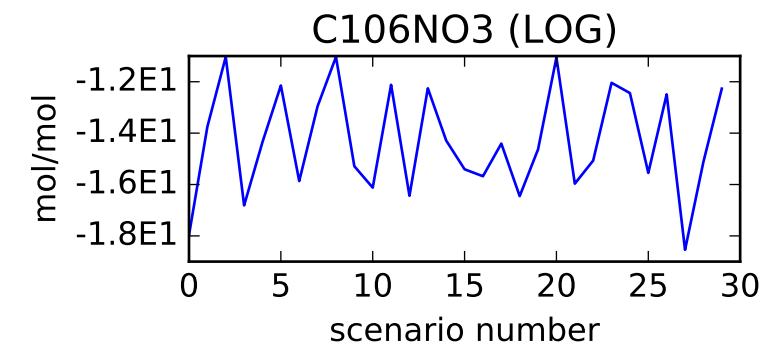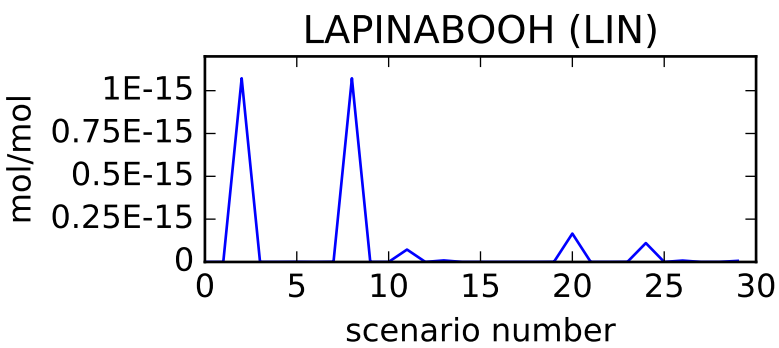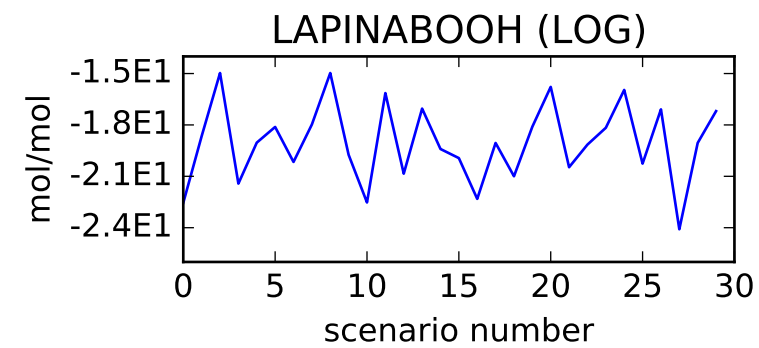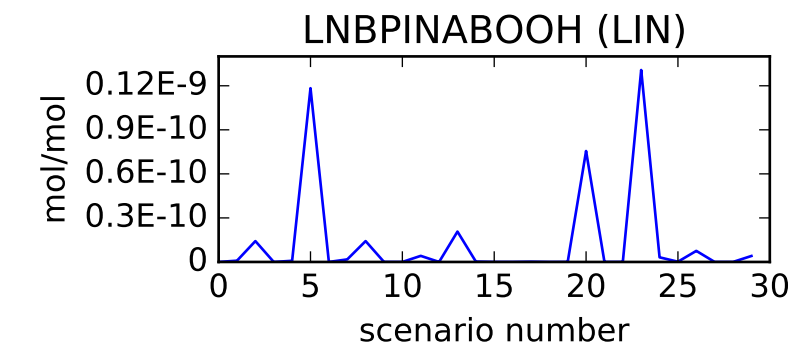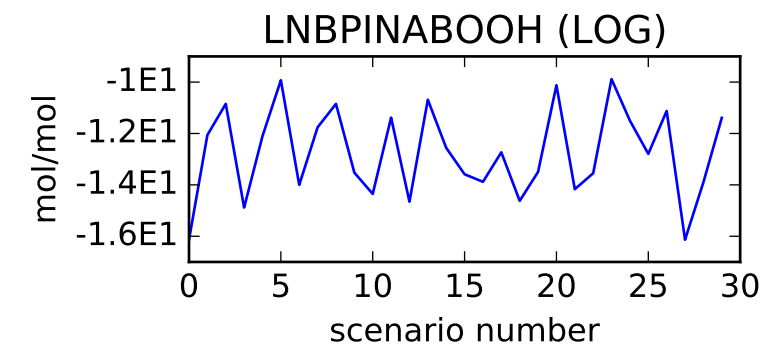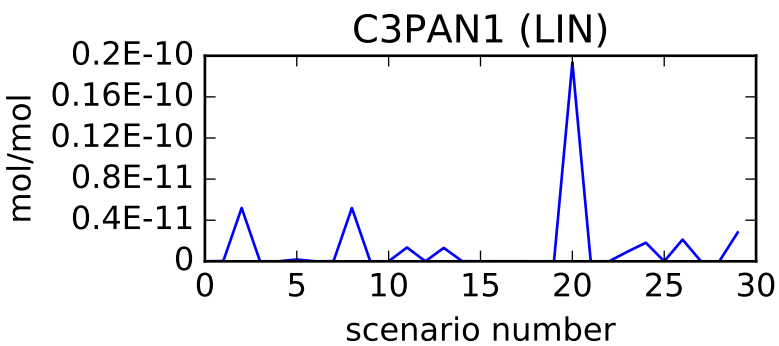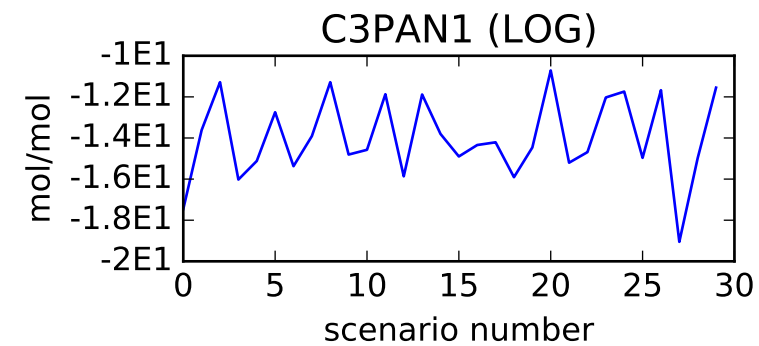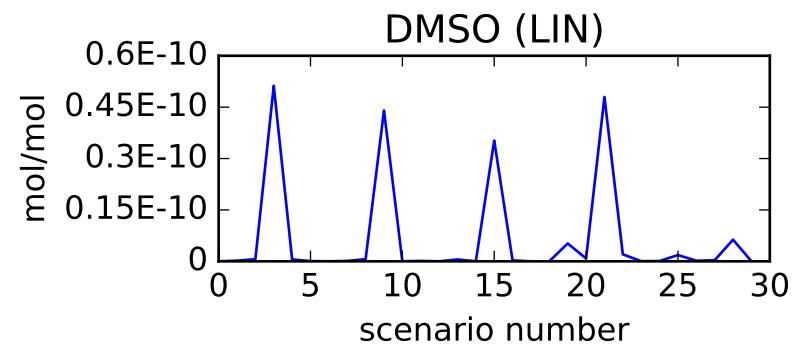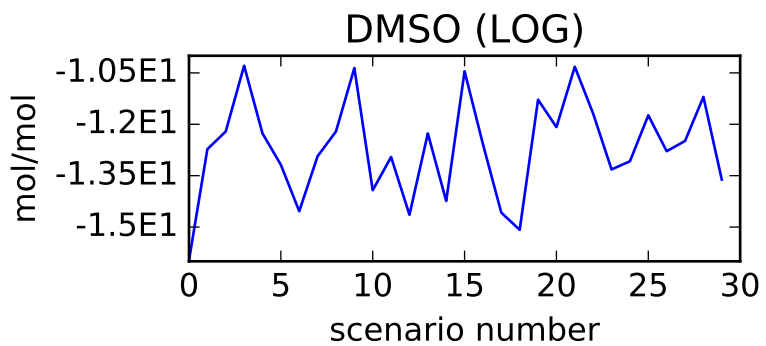

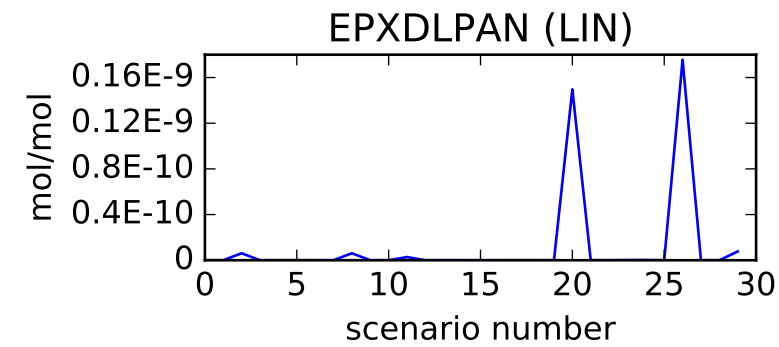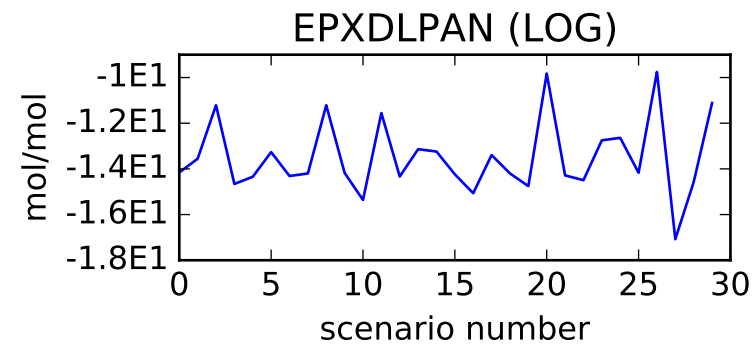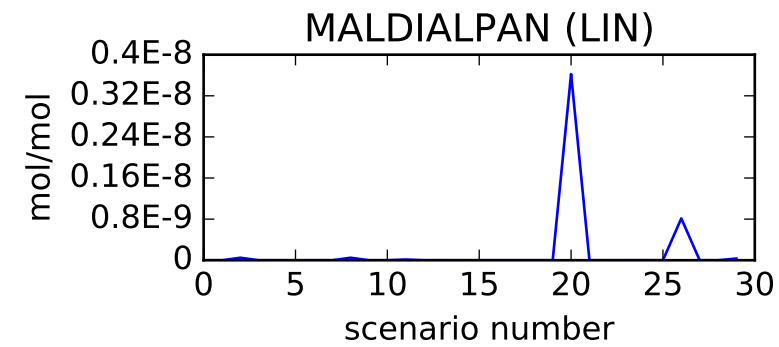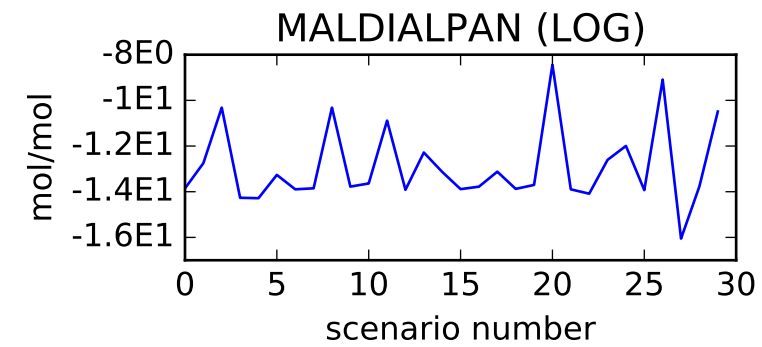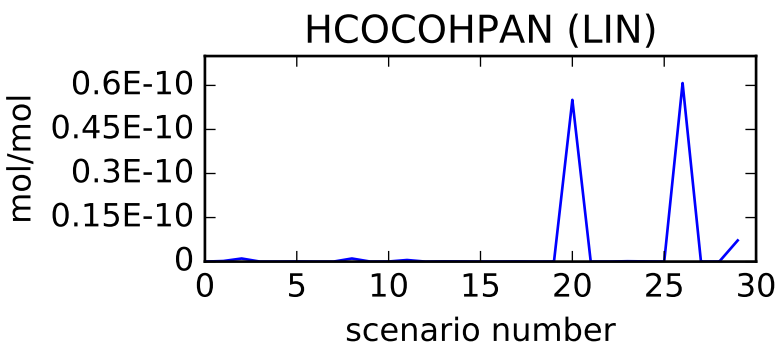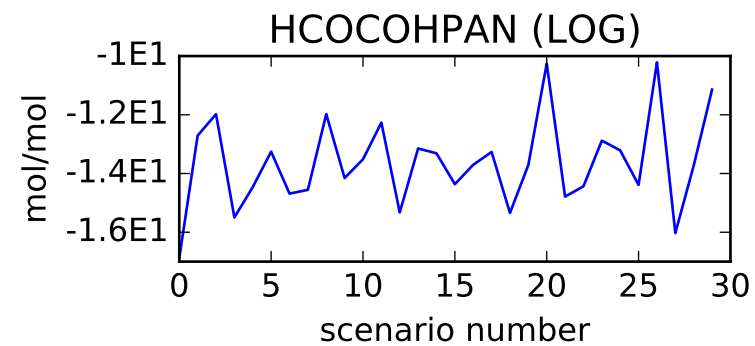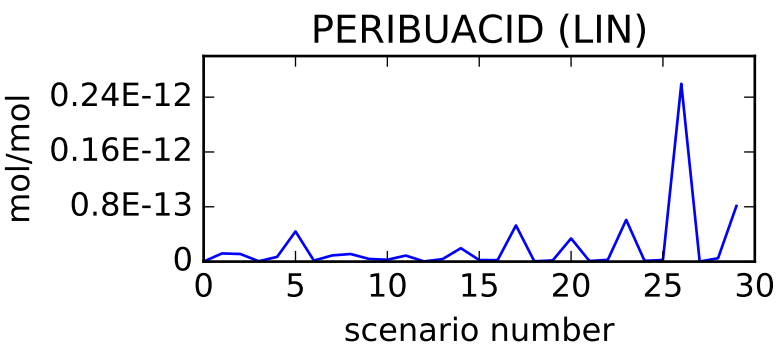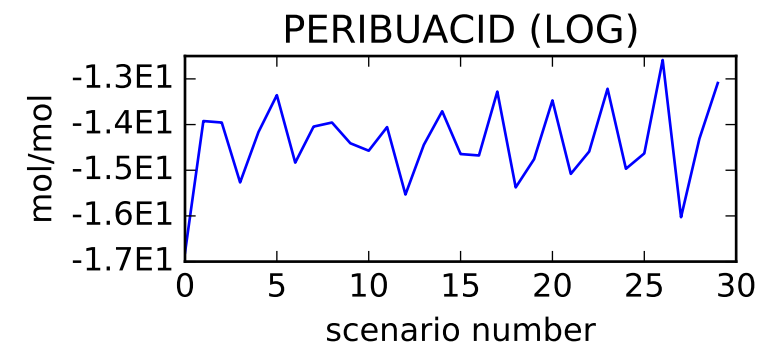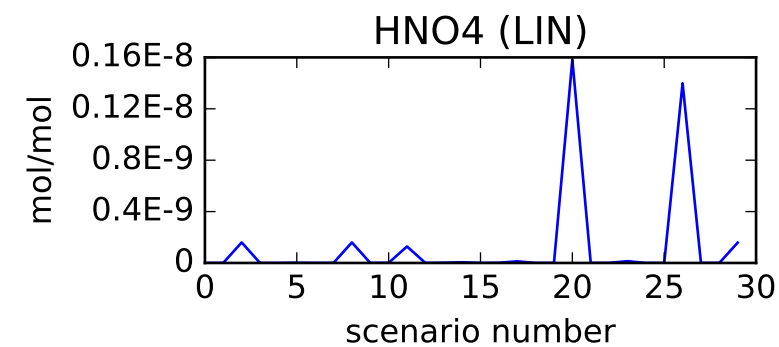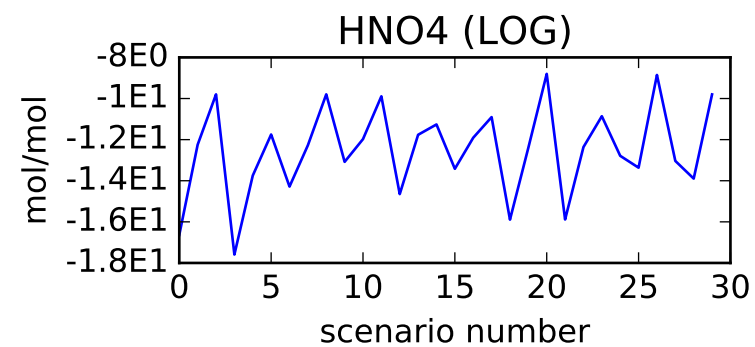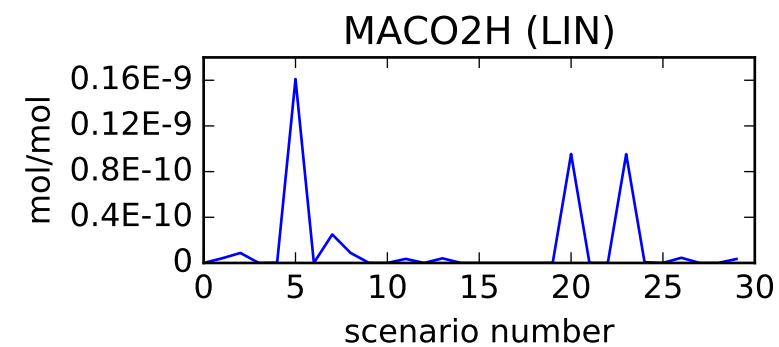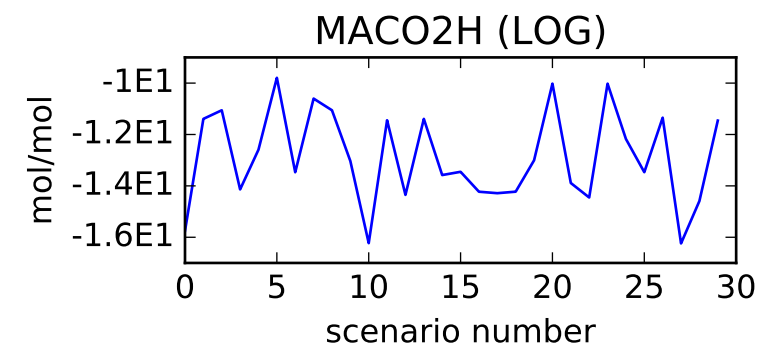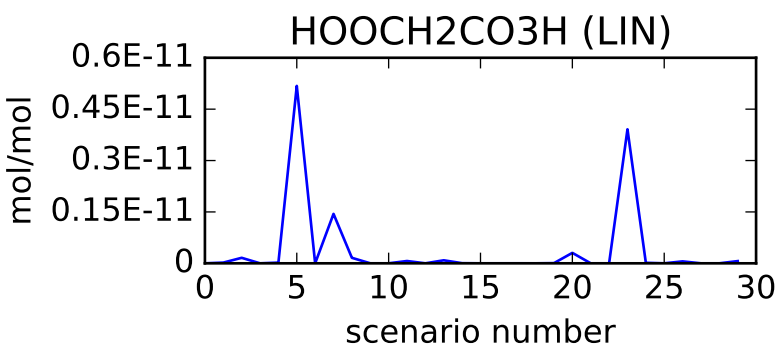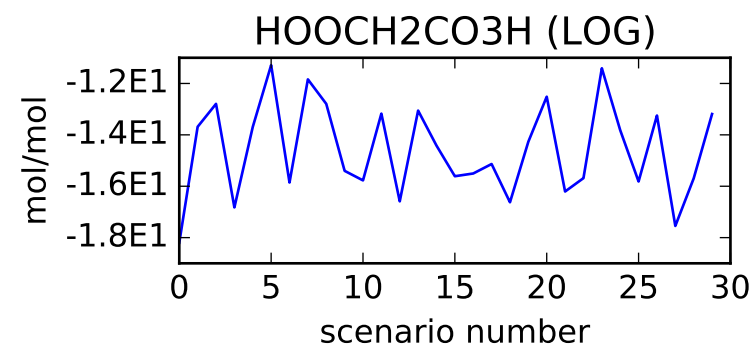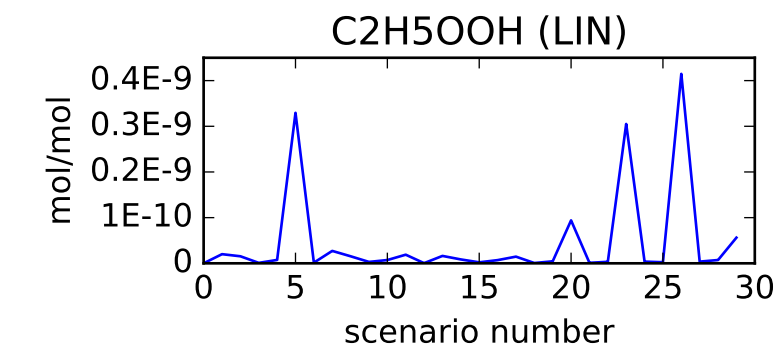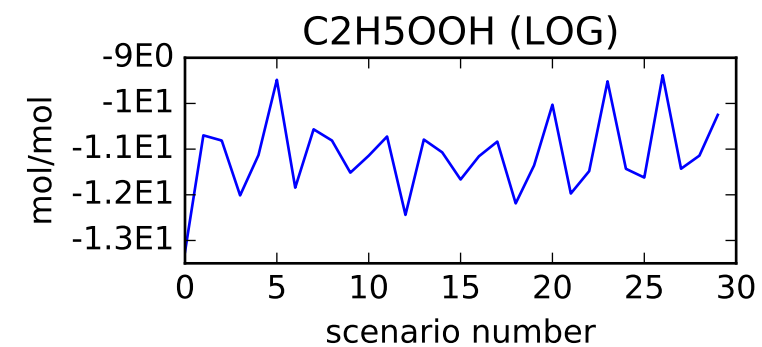

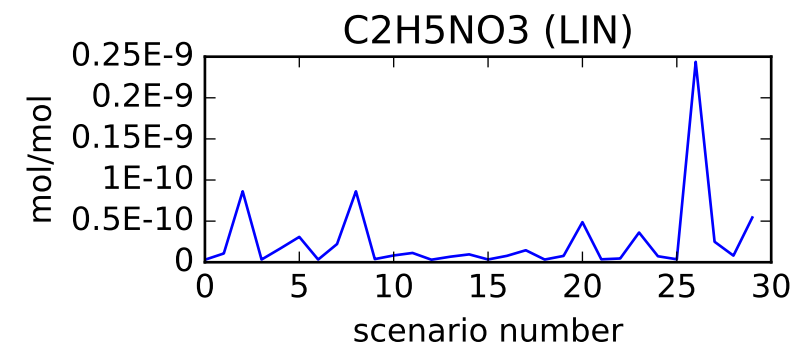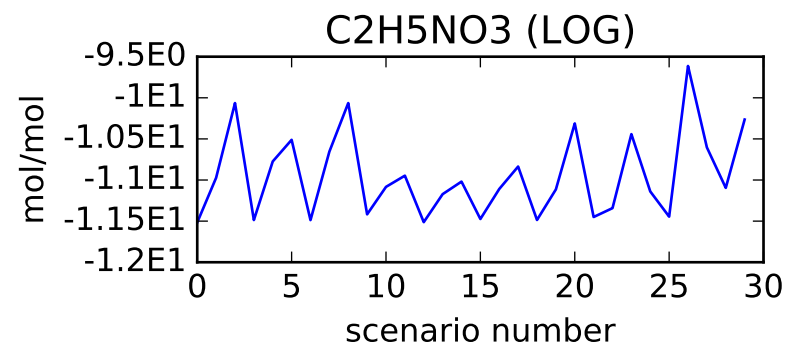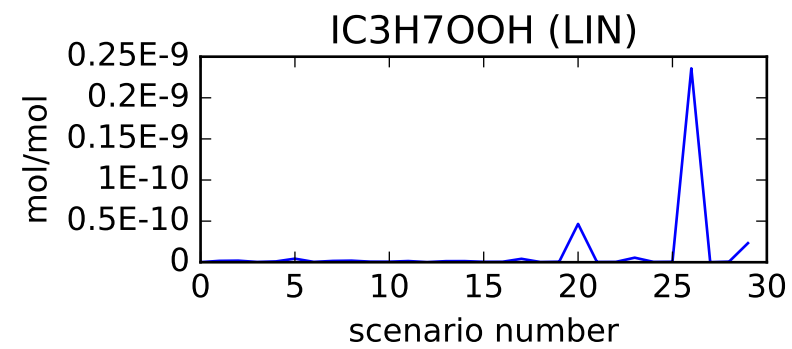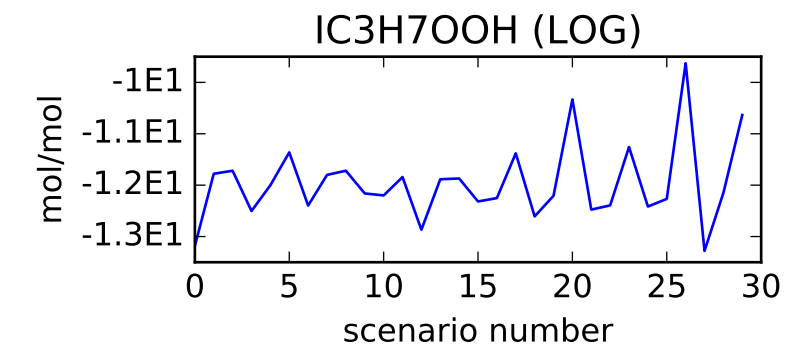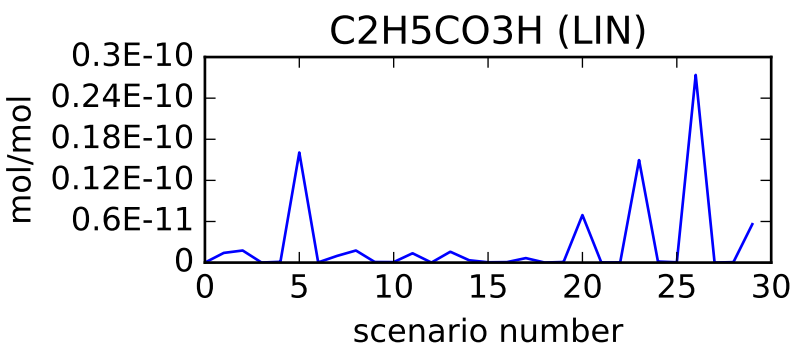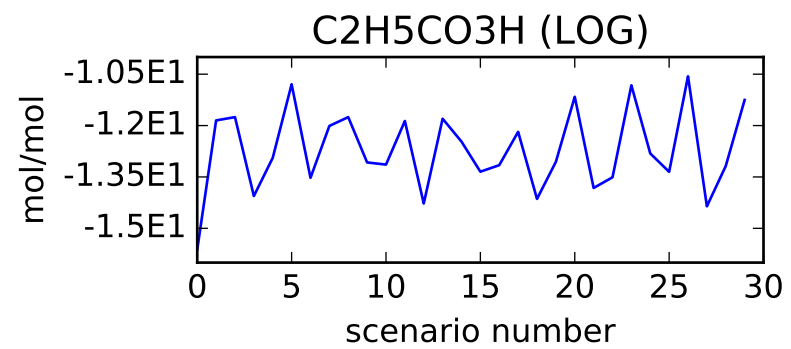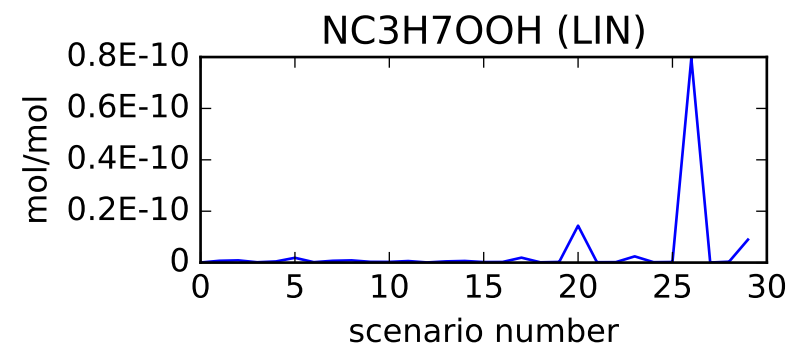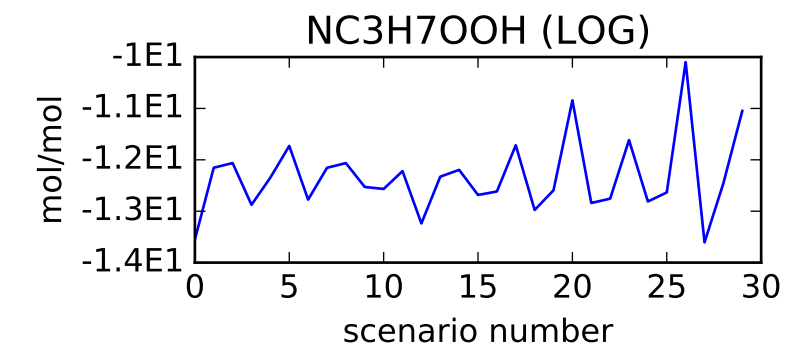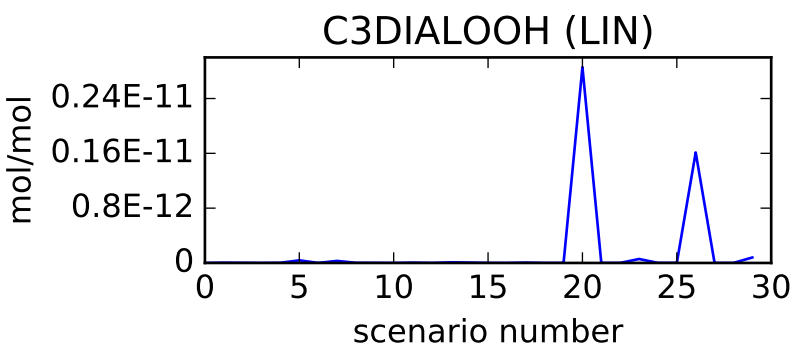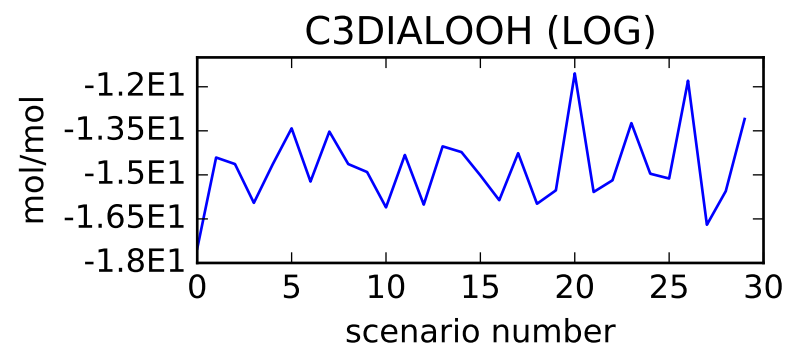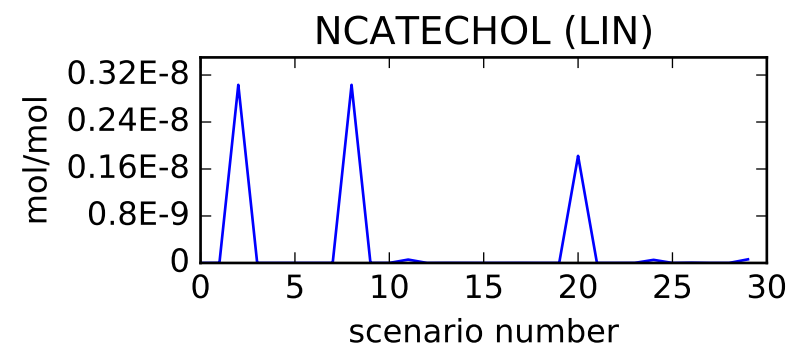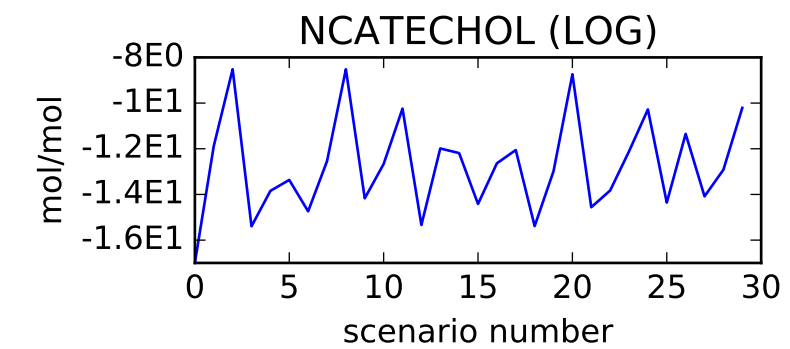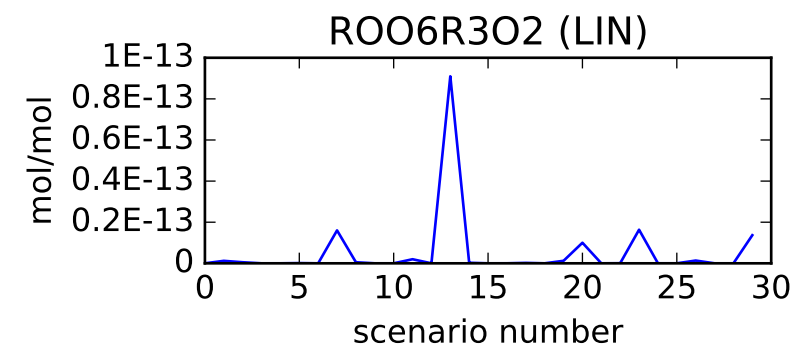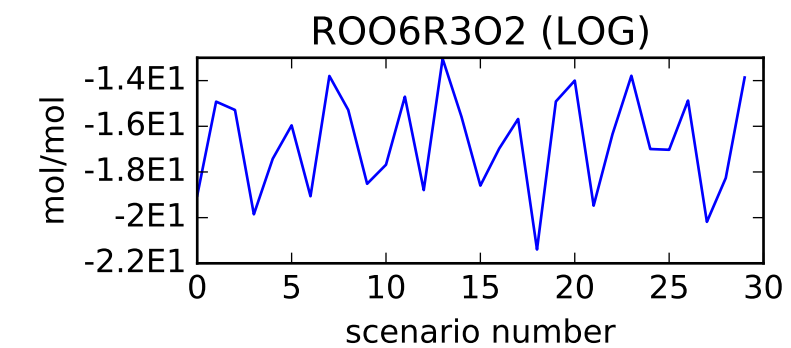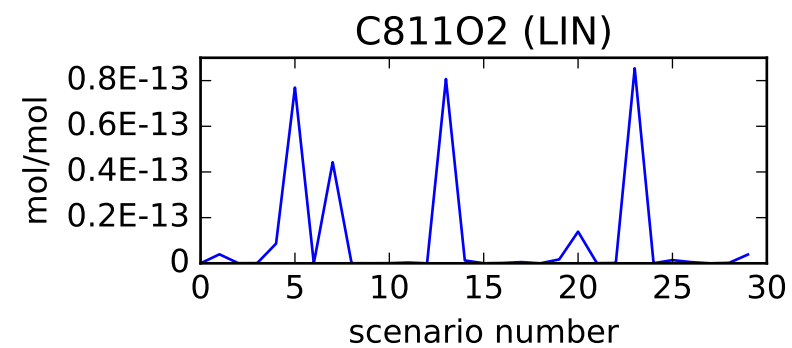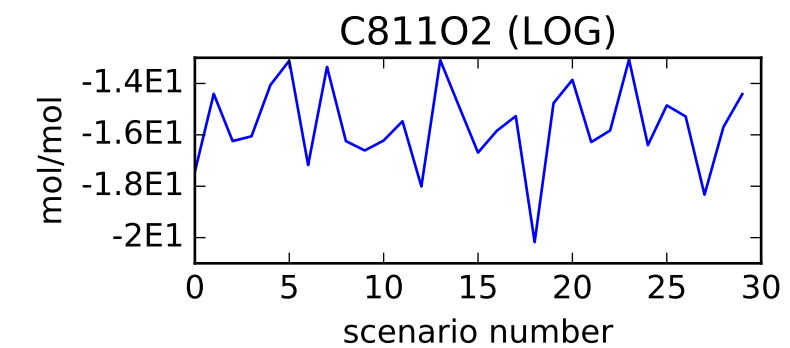



BIACETOH (LIN)

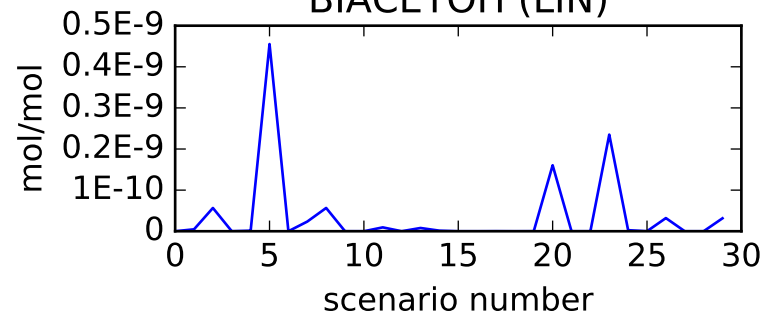

BIACETOH (LOG)

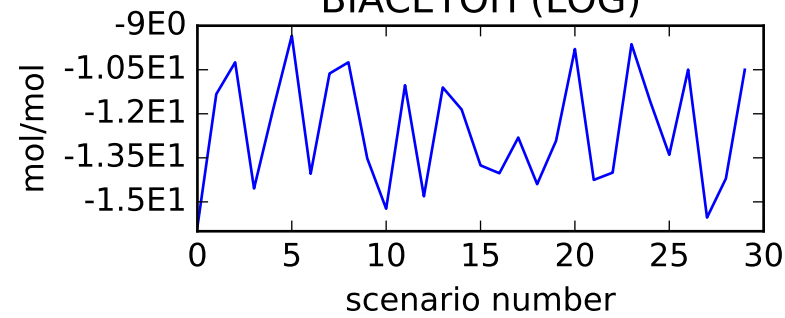

LXYL (LIN)

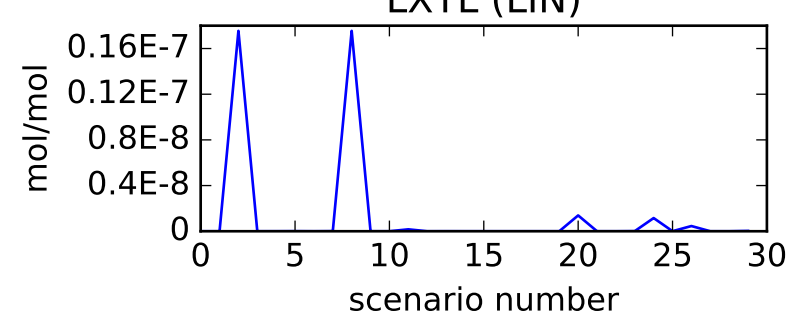

LXYL (LOG)

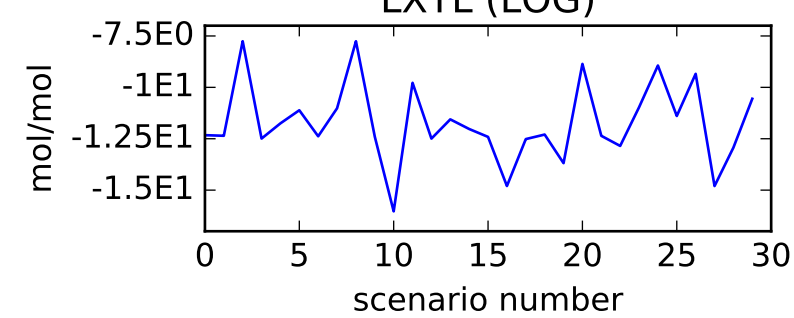

EBENZ (LIN)

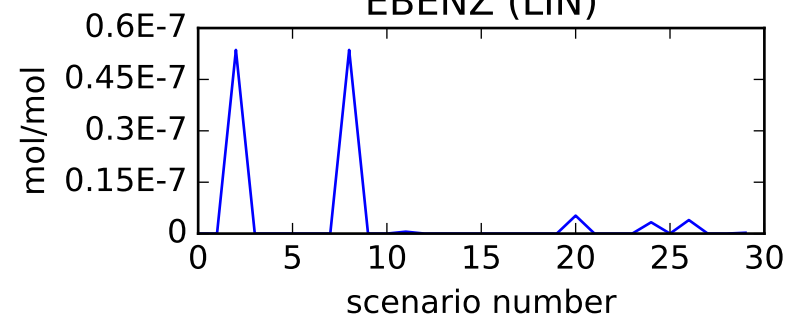

EBENZ (LOG)

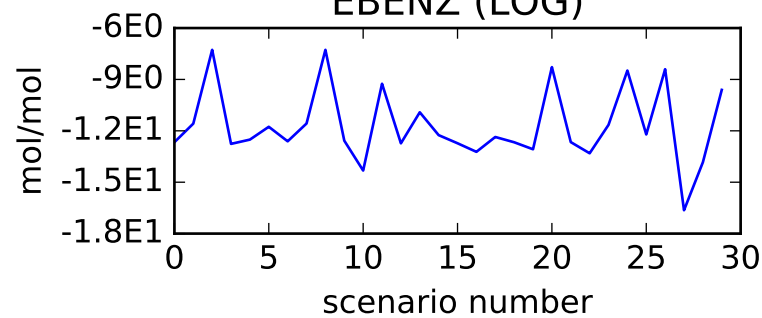

LTMB (LIN)

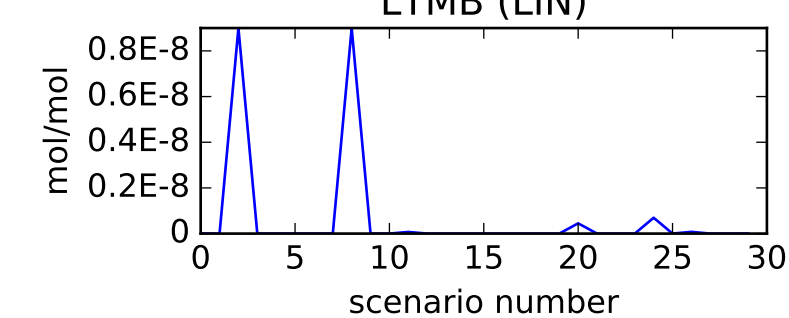

LTMB (LOG)

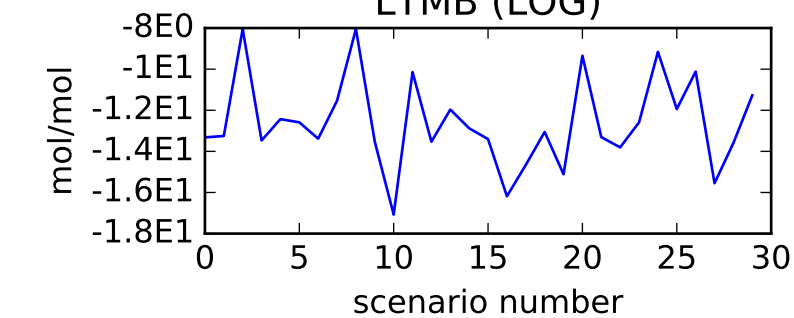

LISOPEFO (LIN)

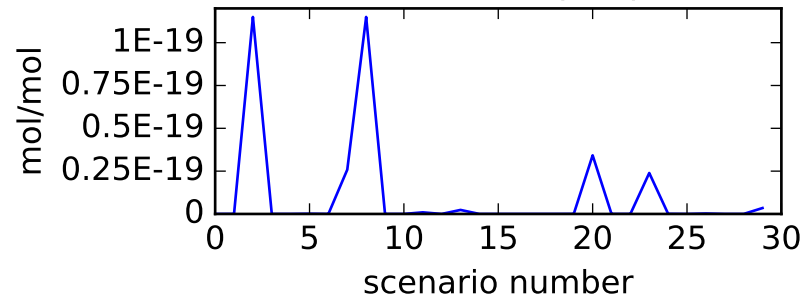

LISOPEFO (LOG)

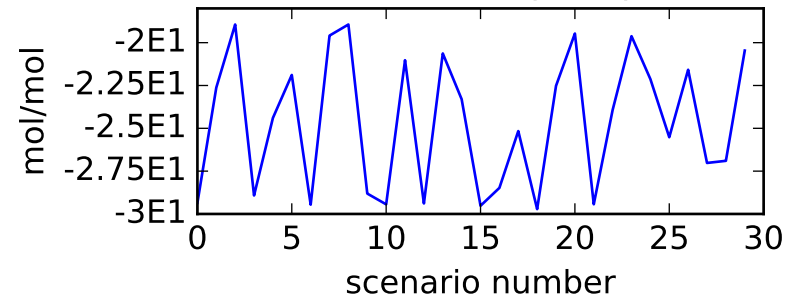

BPINANO3 (LIN)

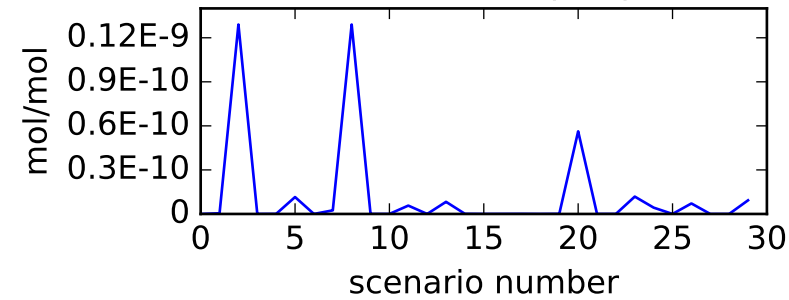

BPINANO3 (LOG)

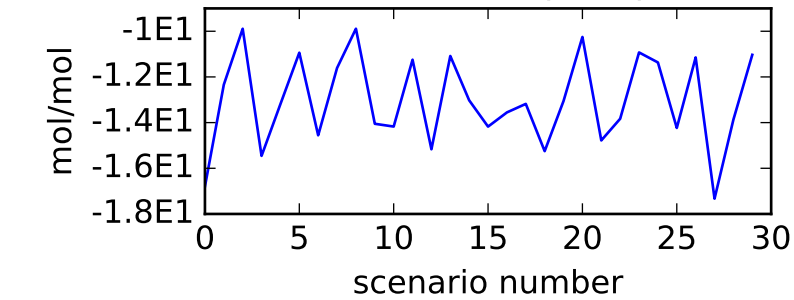

LHAROM (LIN)

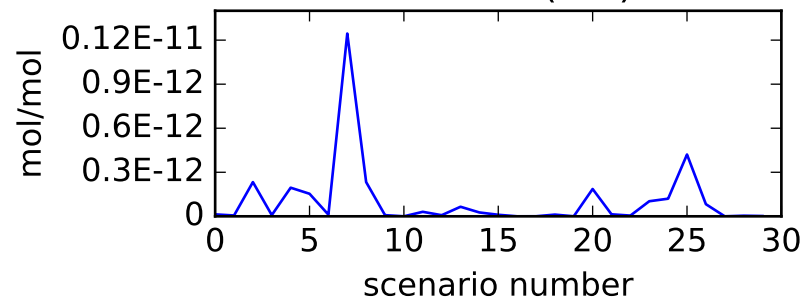

LHAROM (LOG)

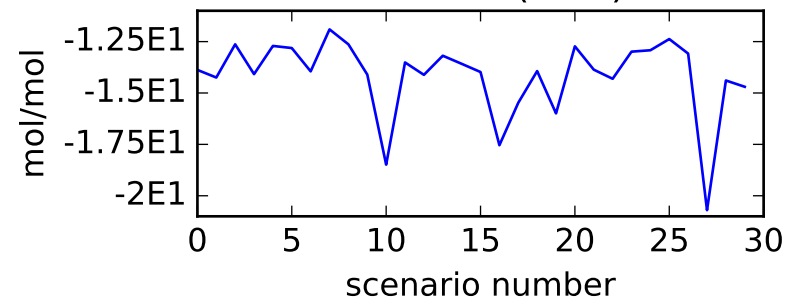

CRESOL (LIN)

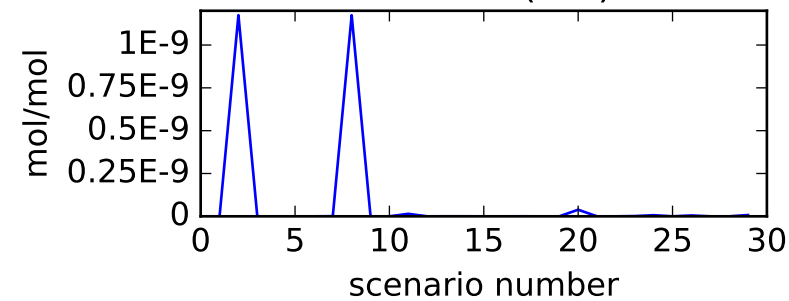

CRESOL (LOG)

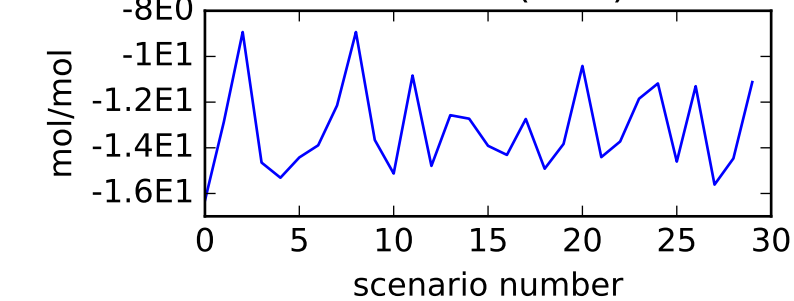

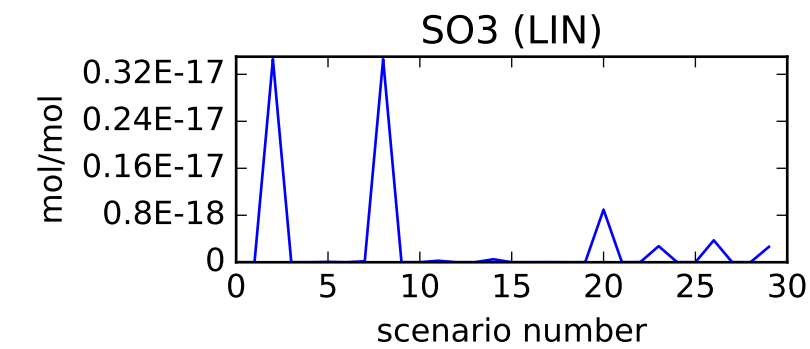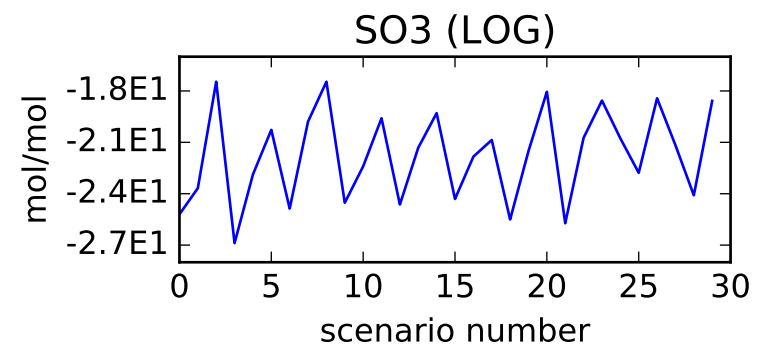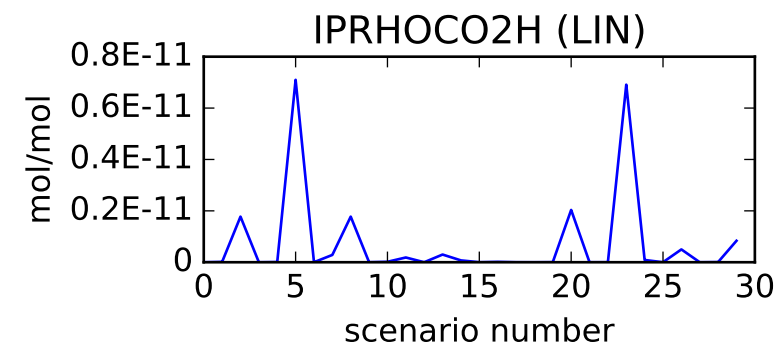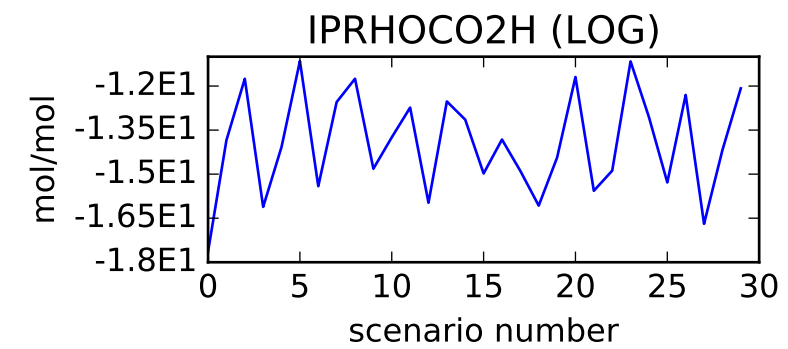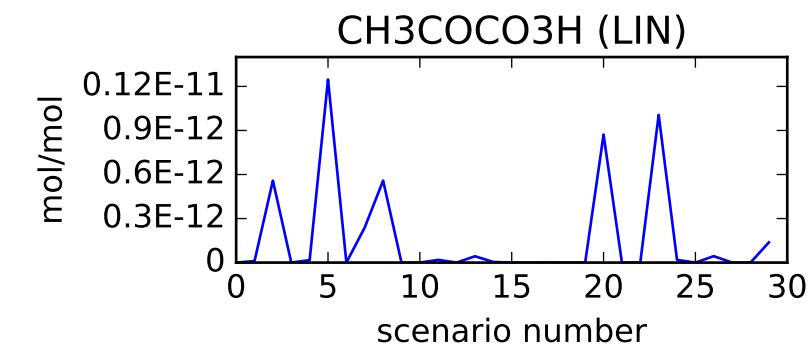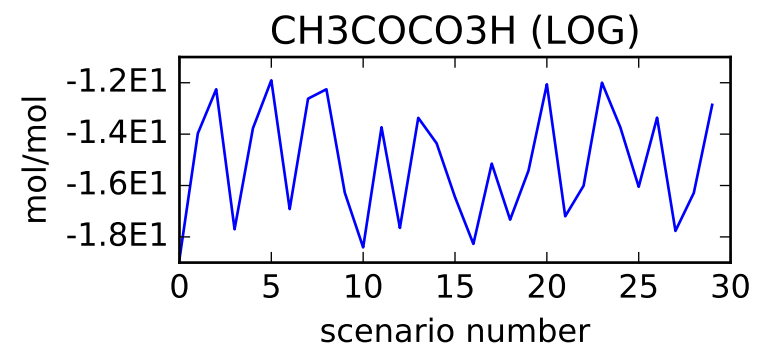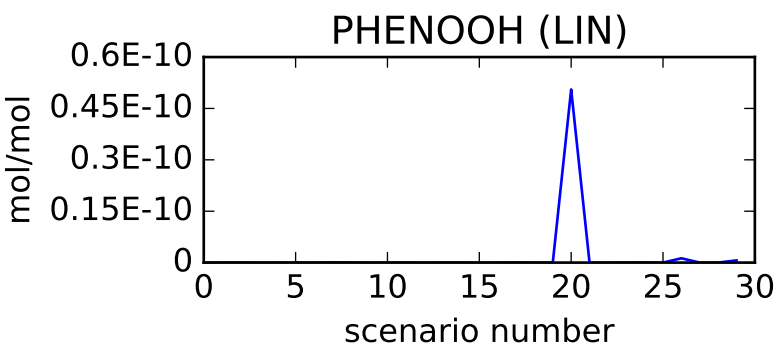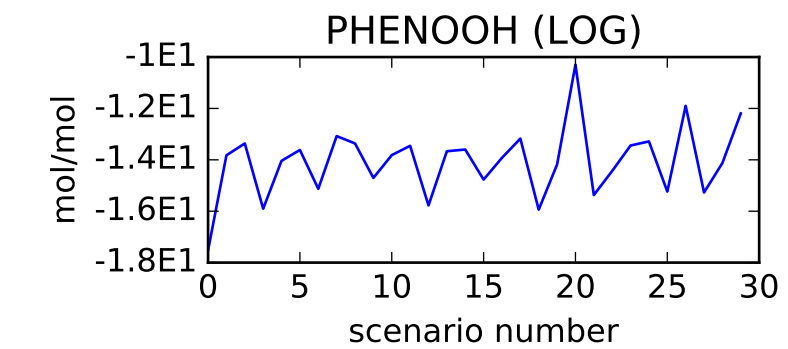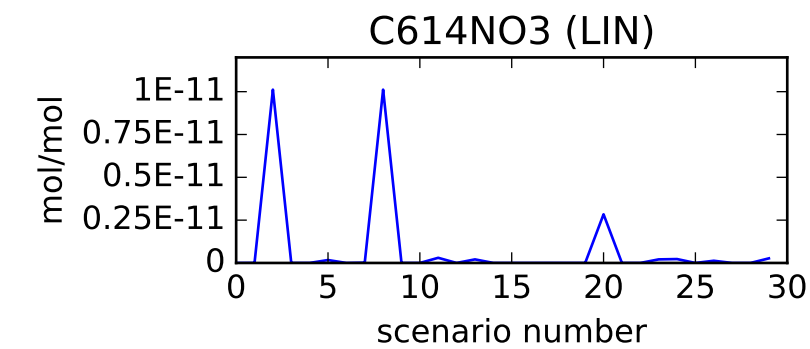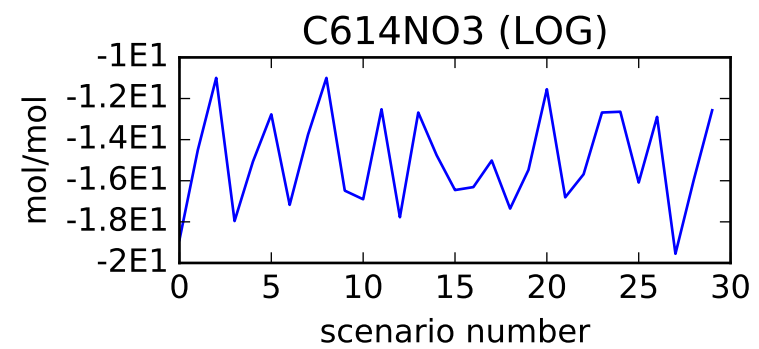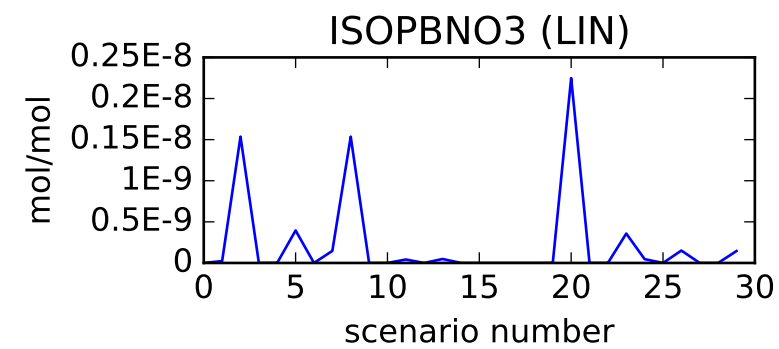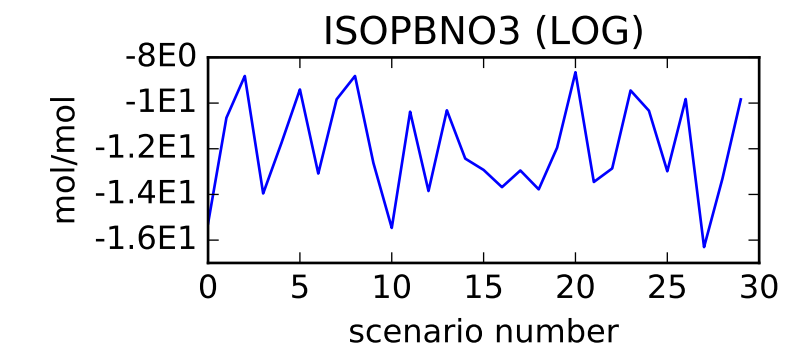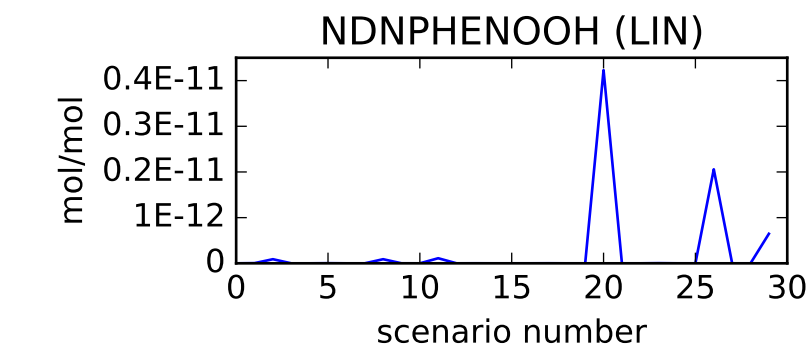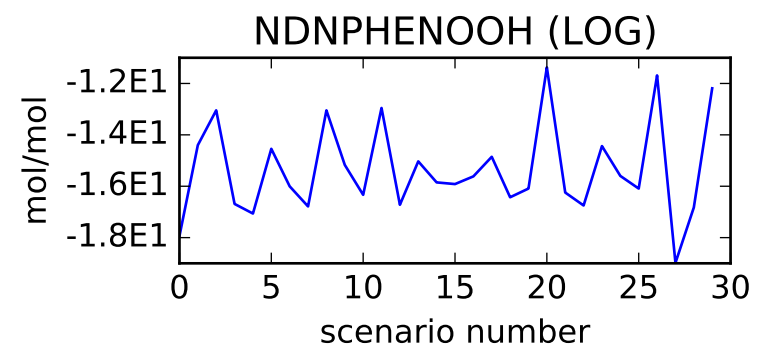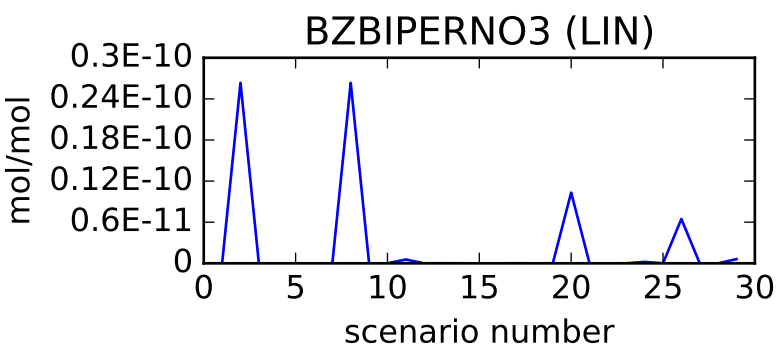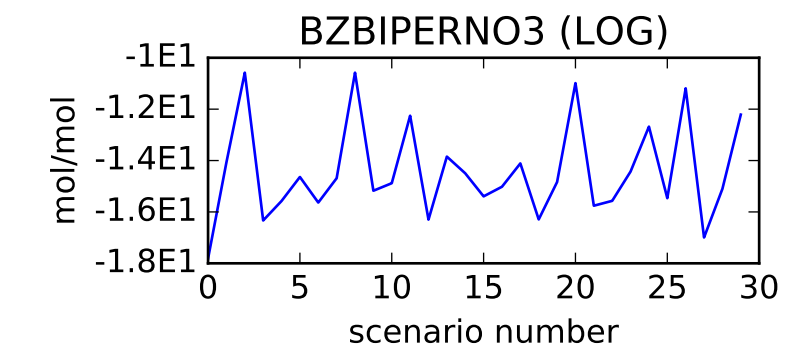

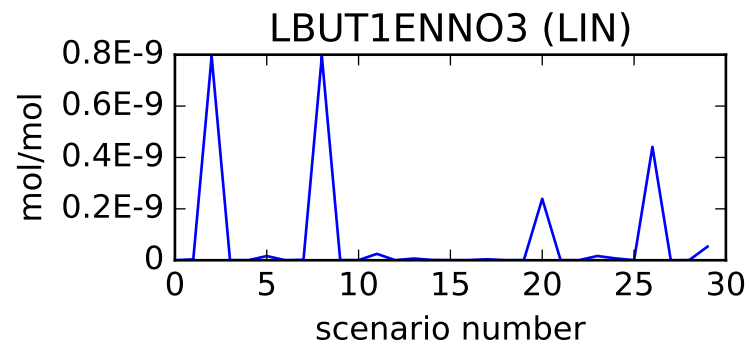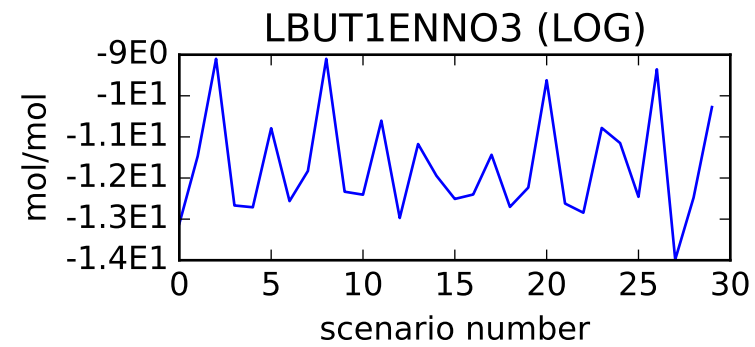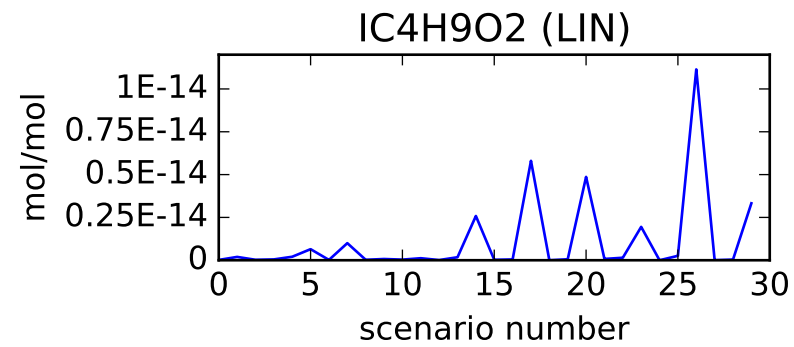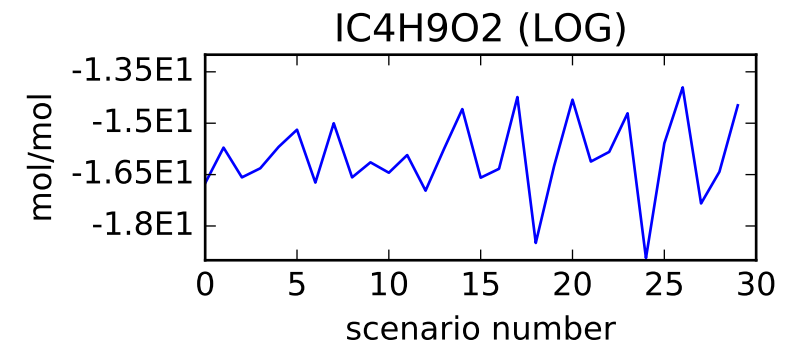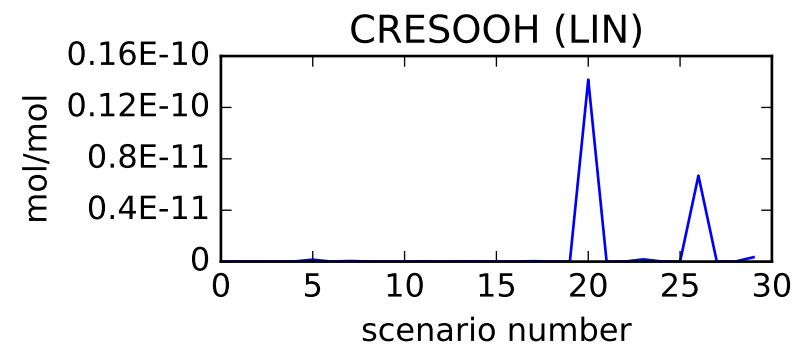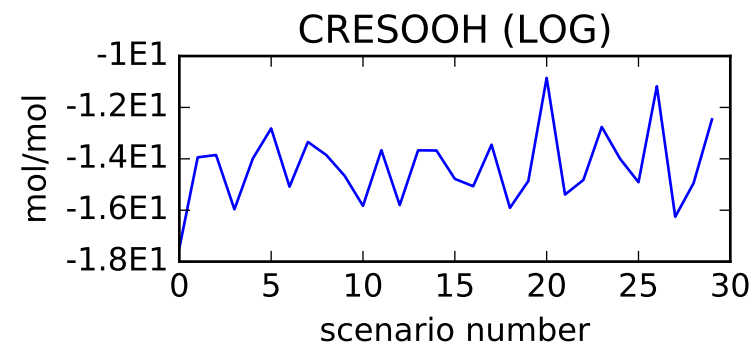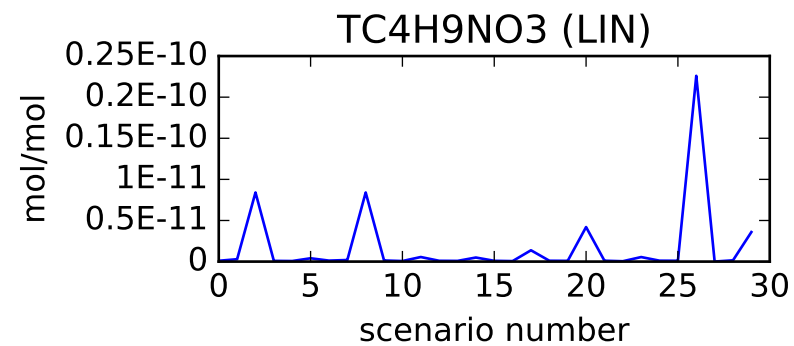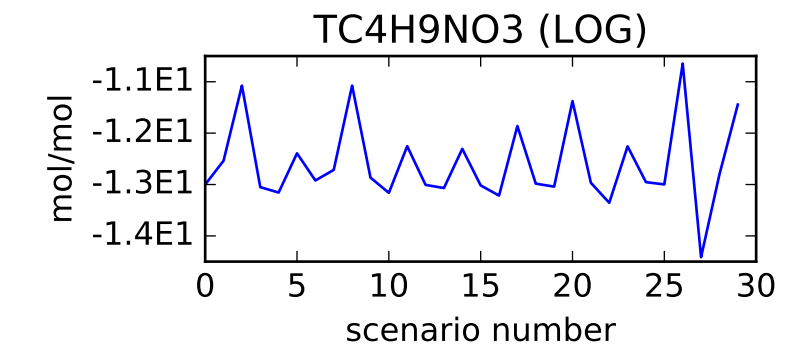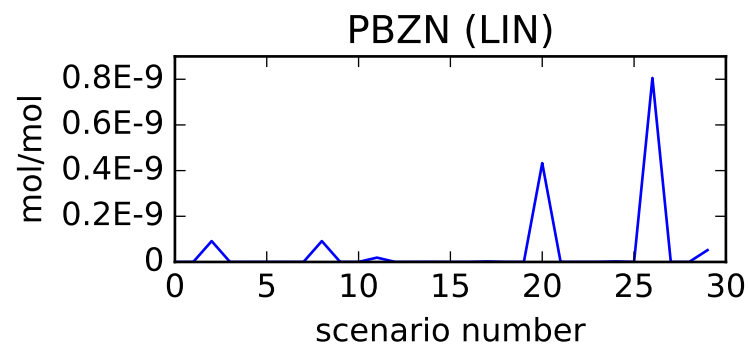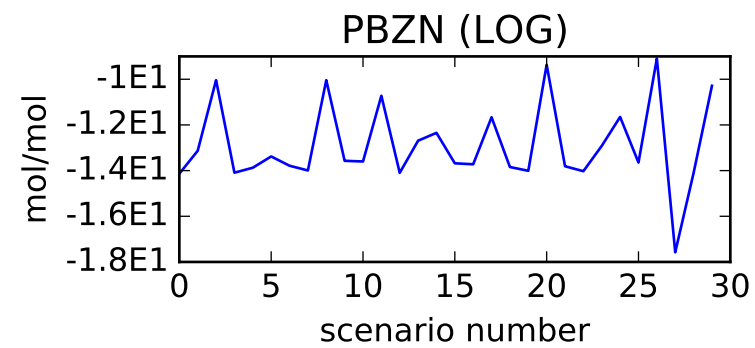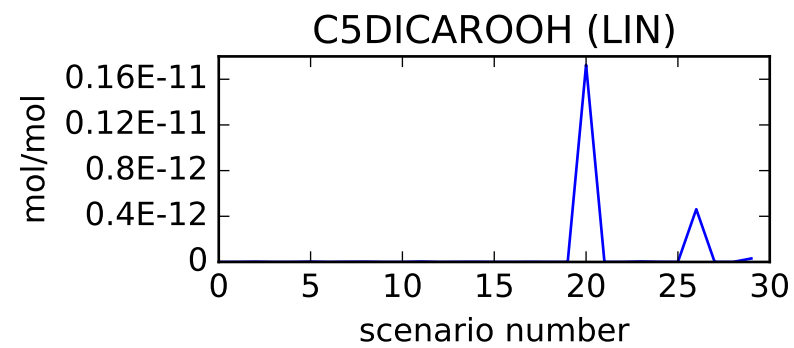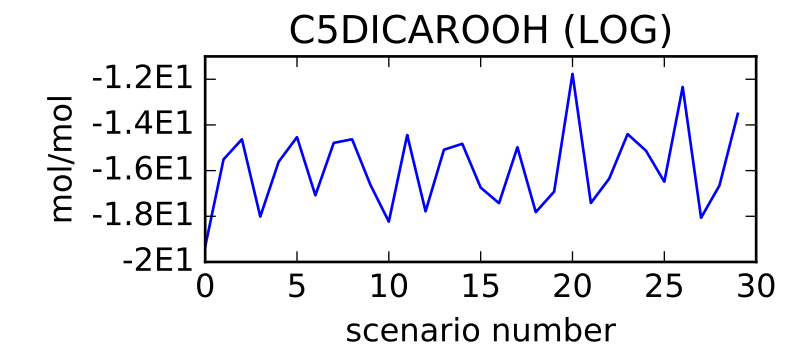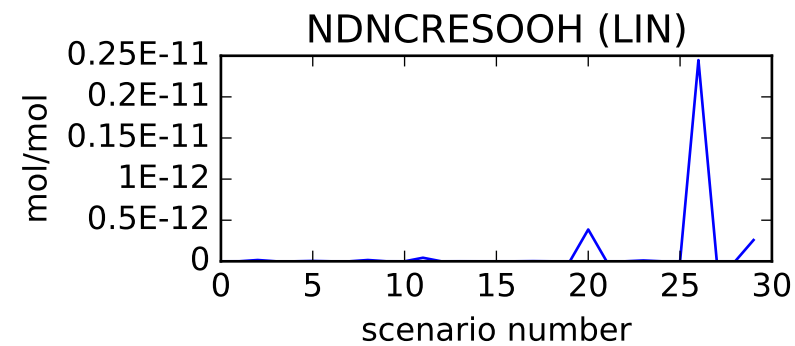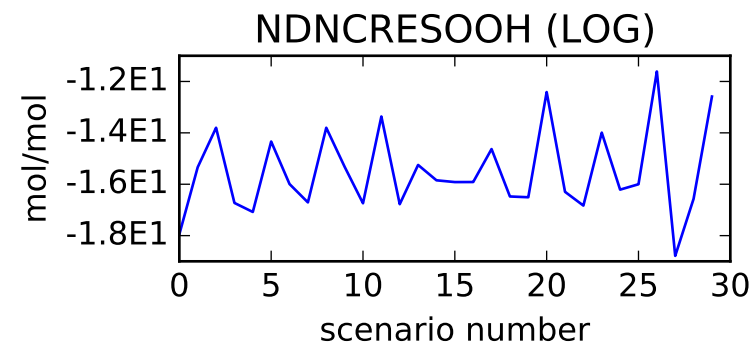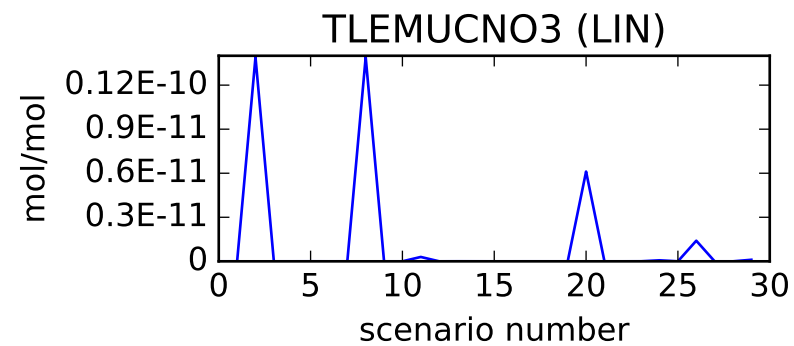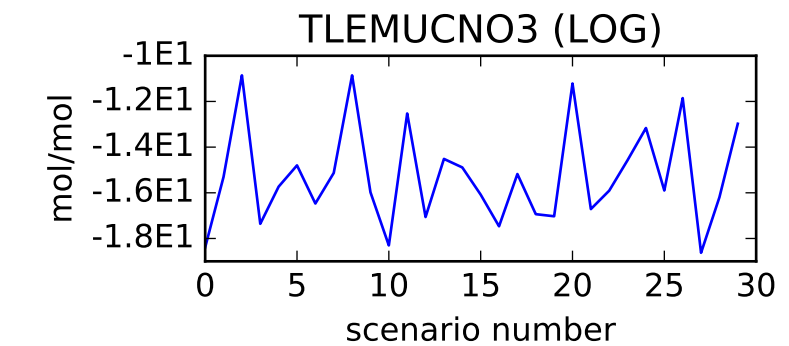

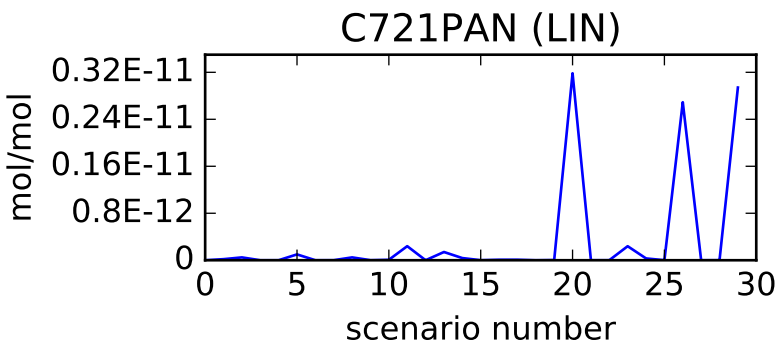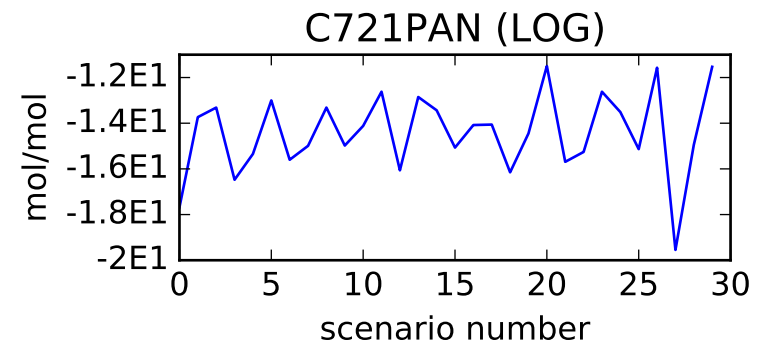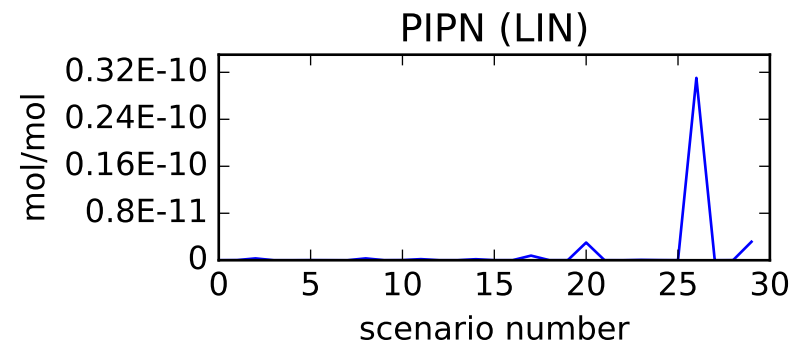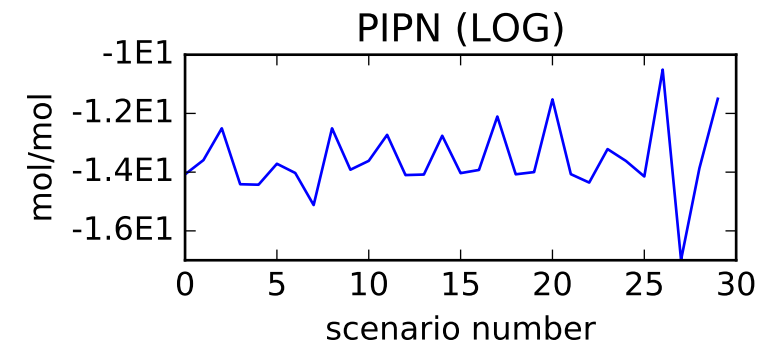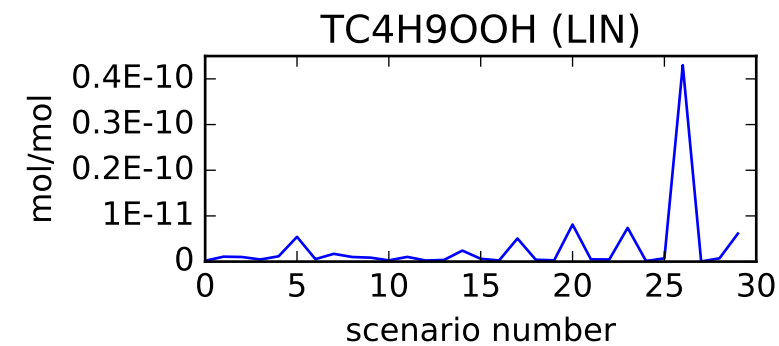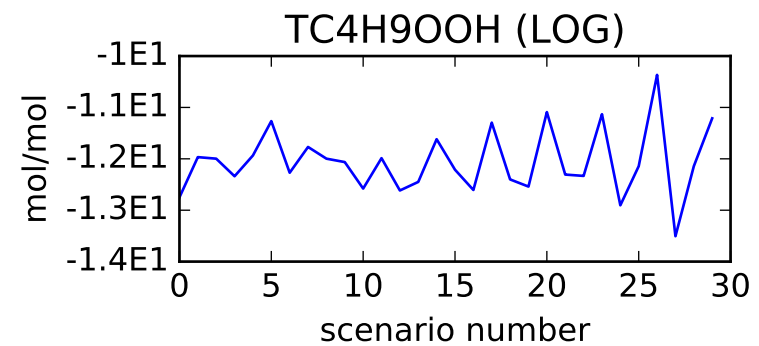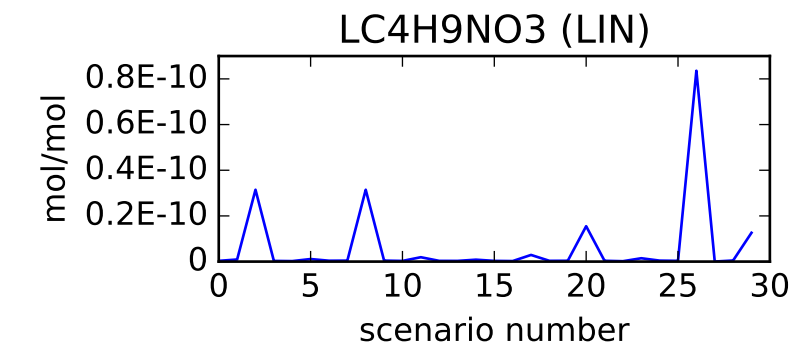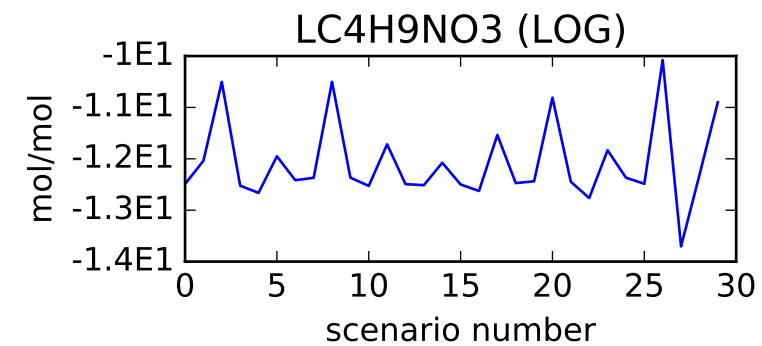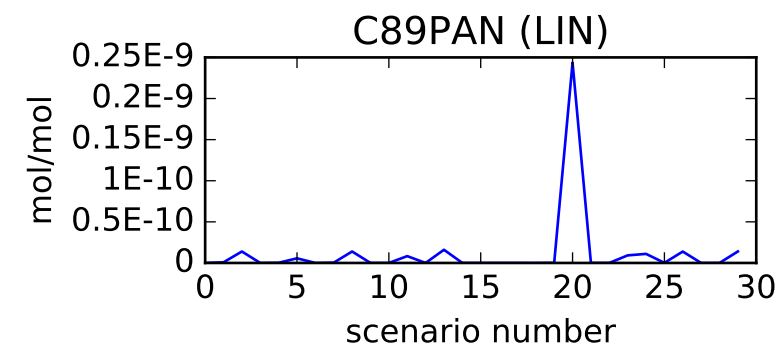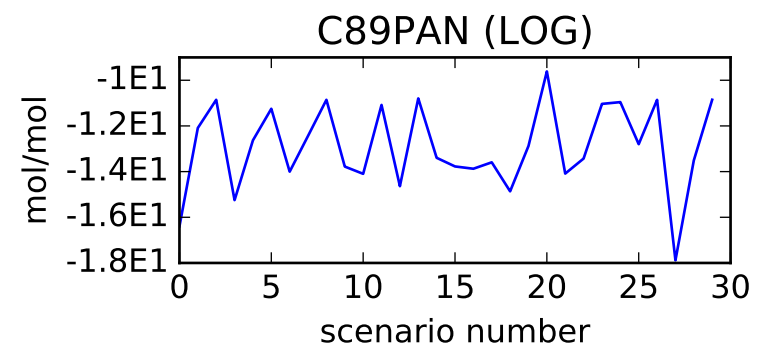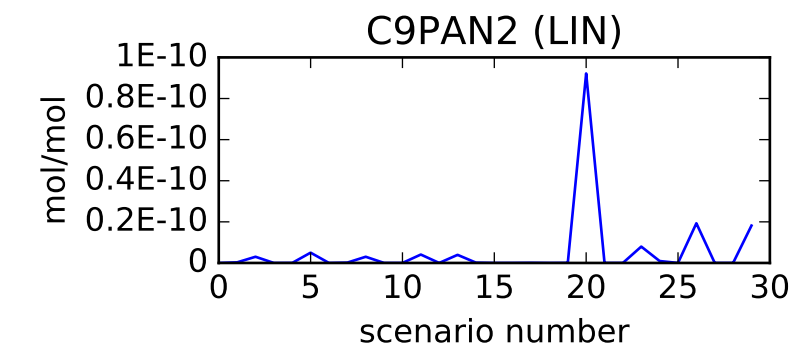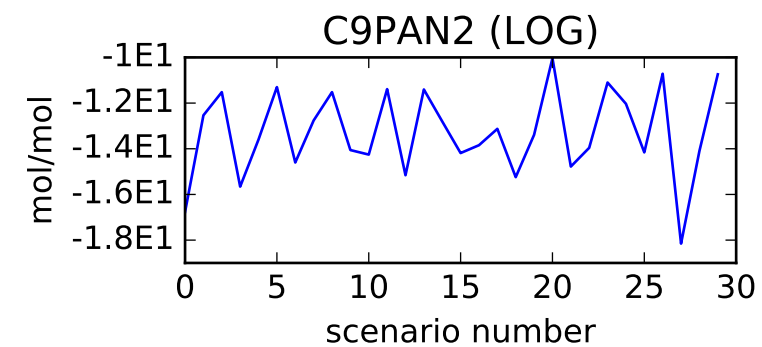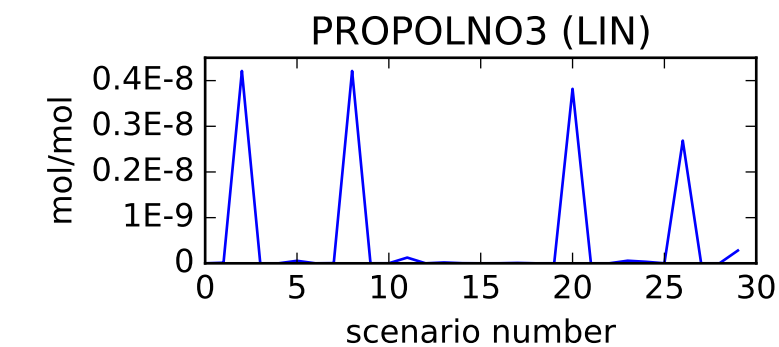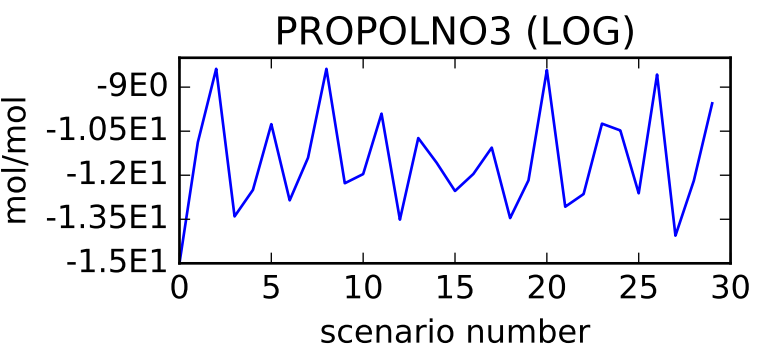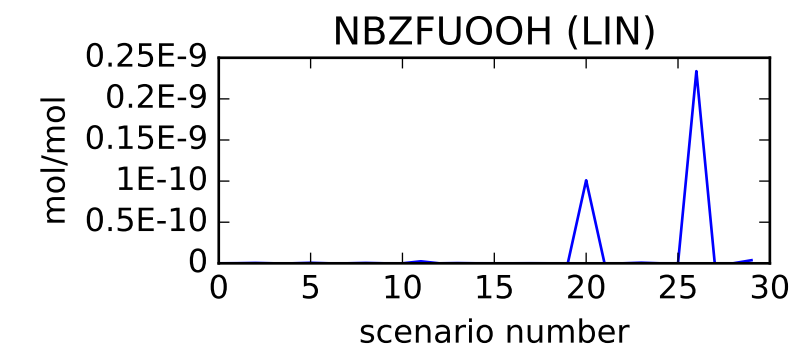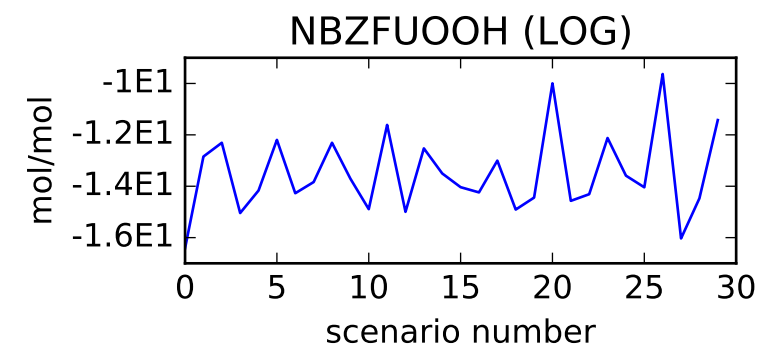

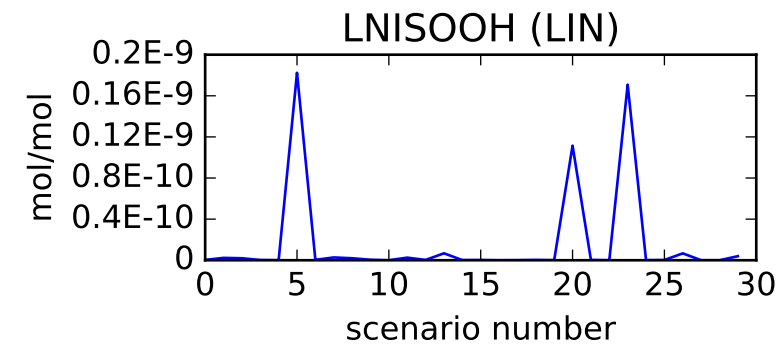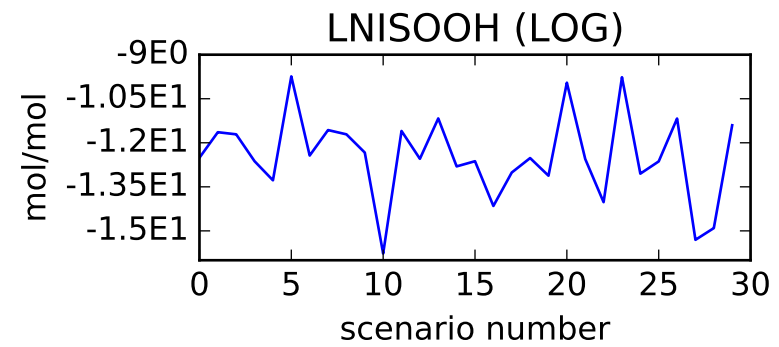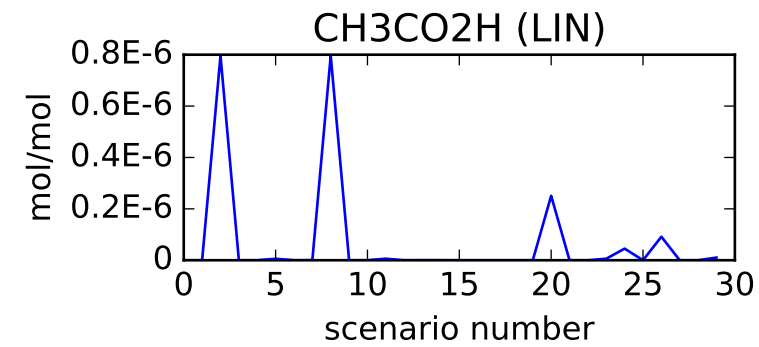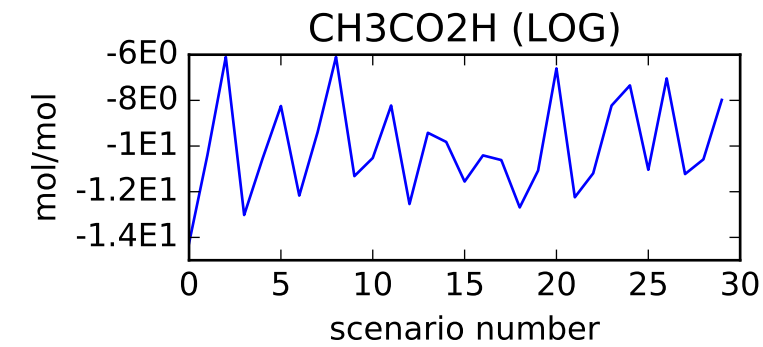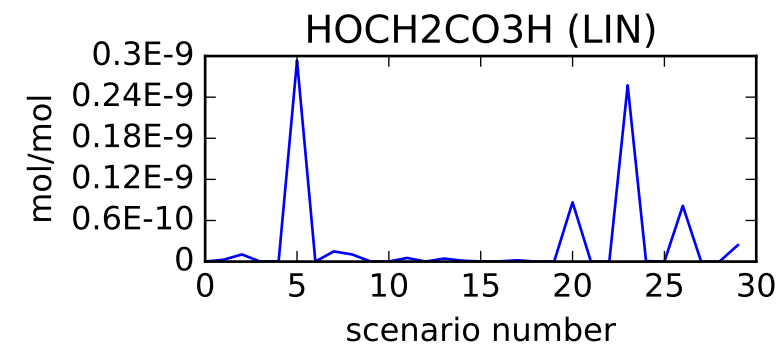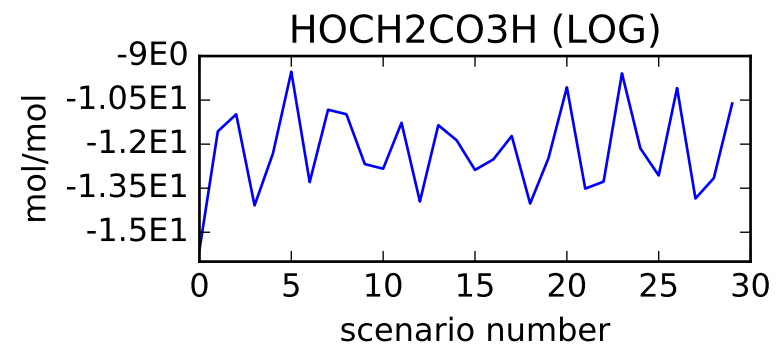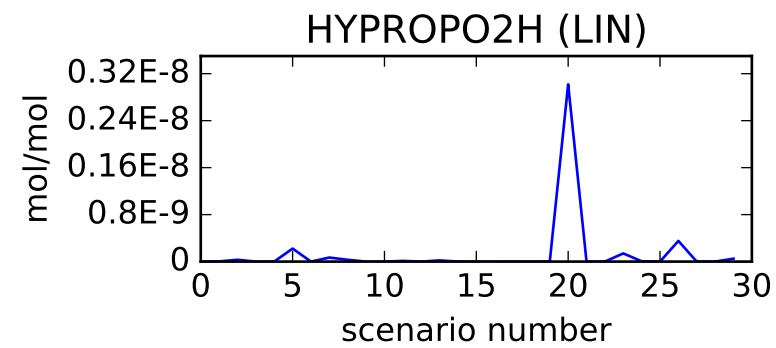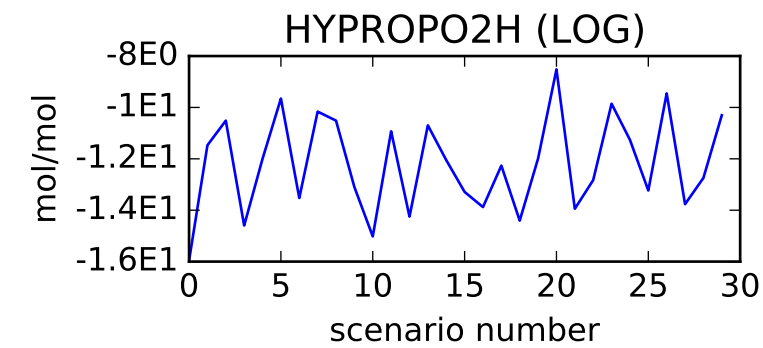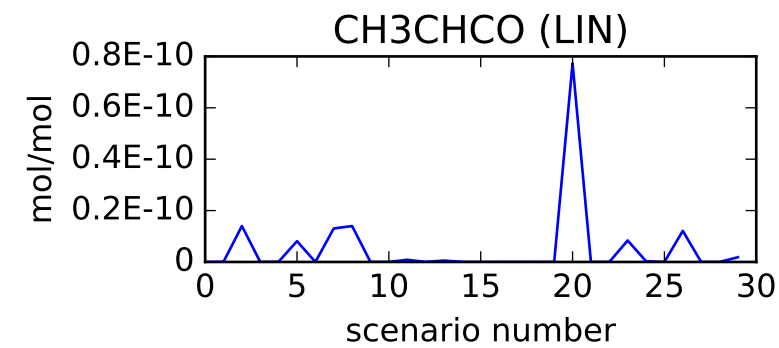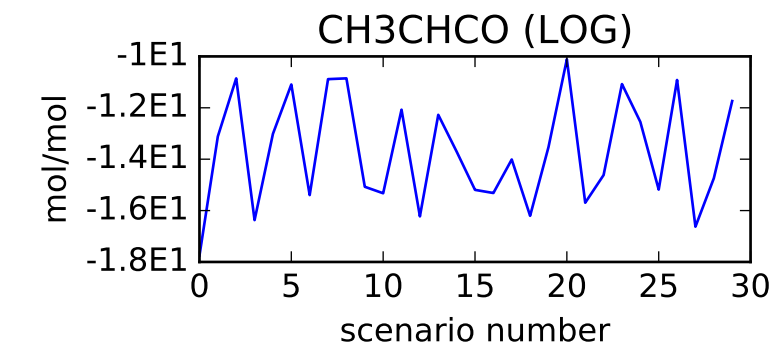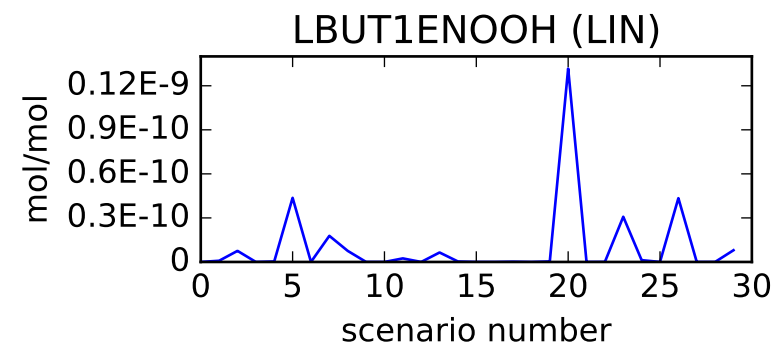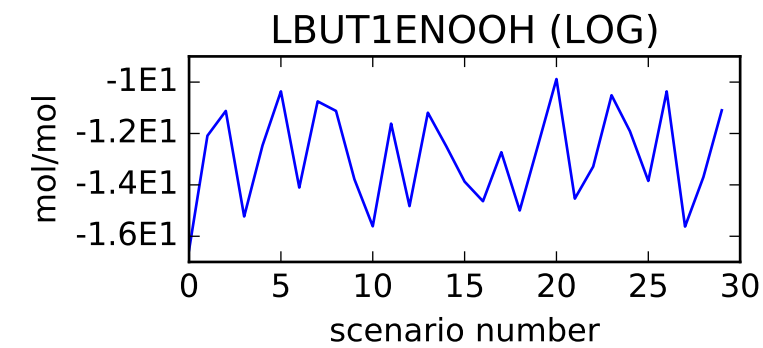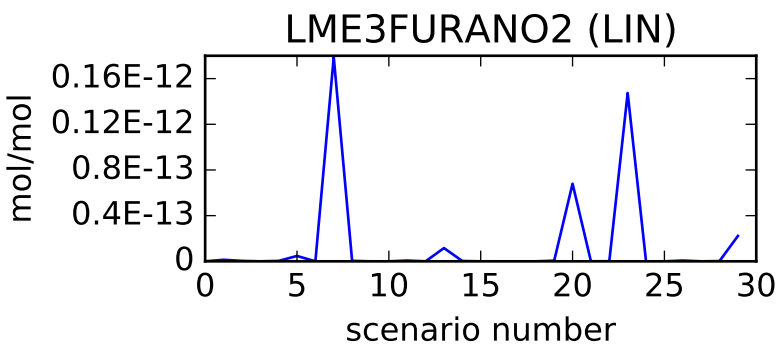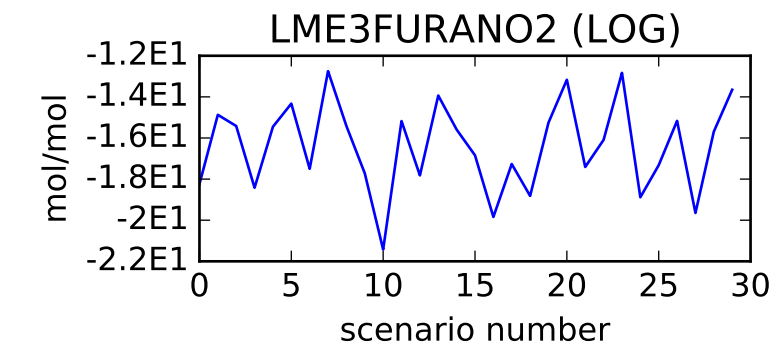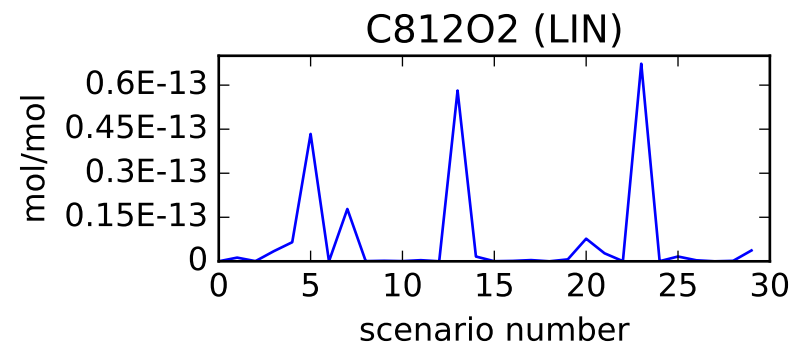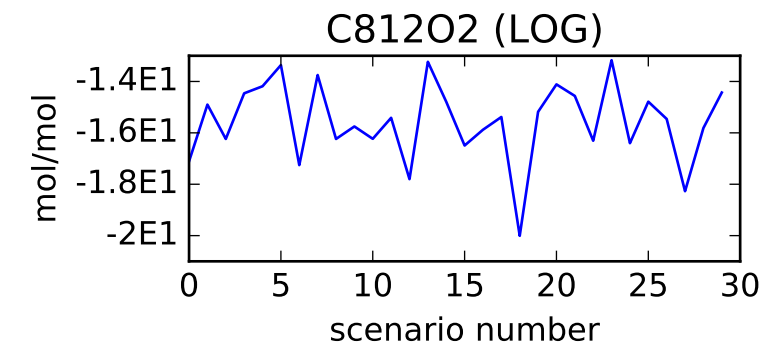

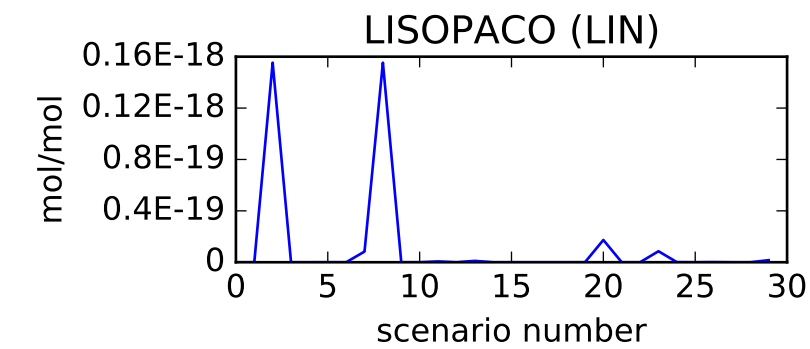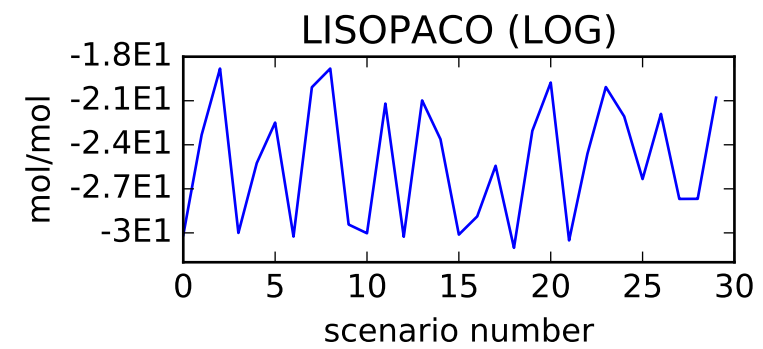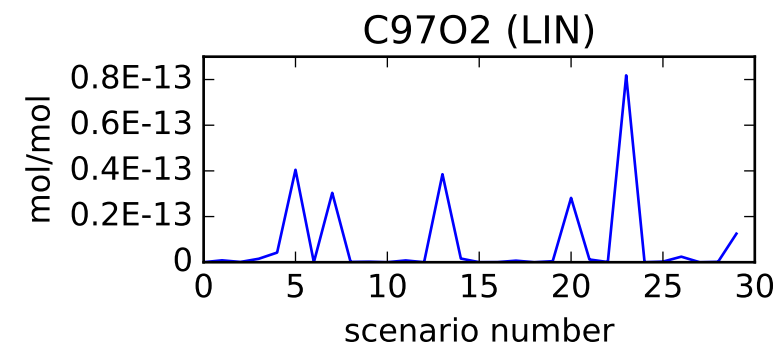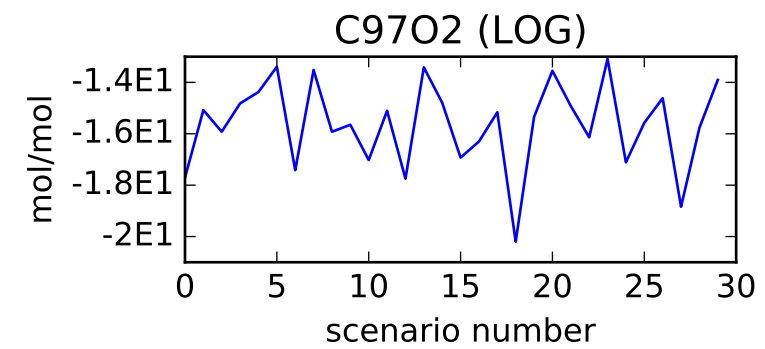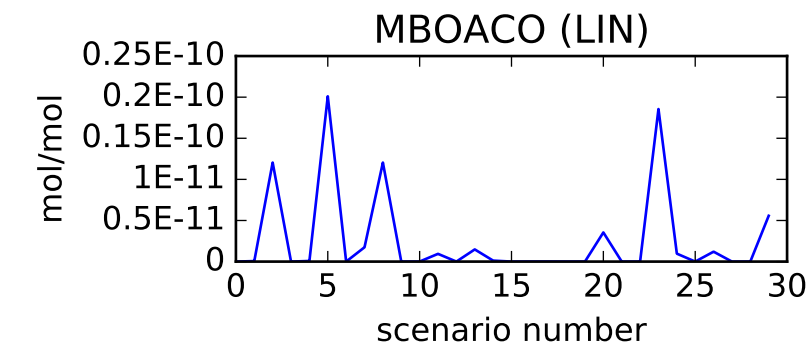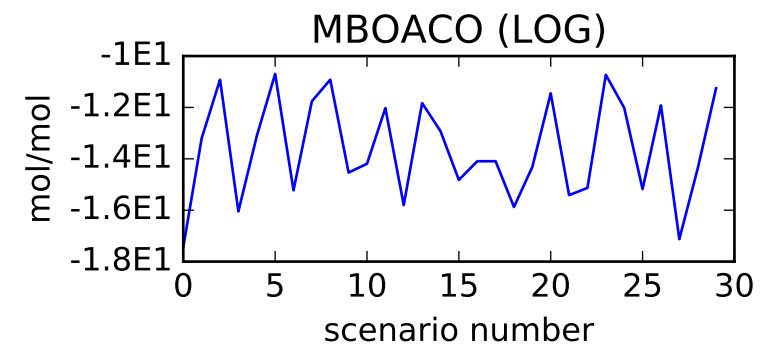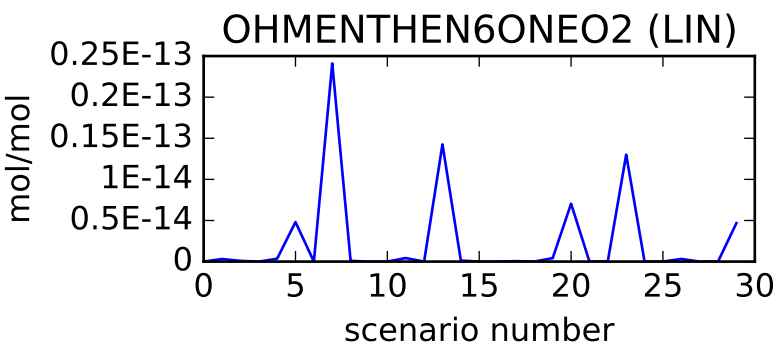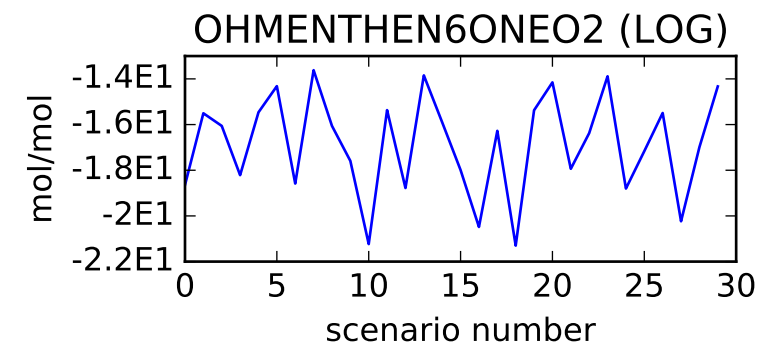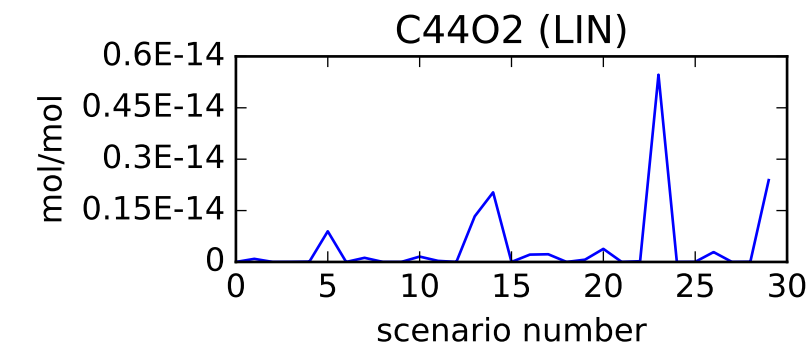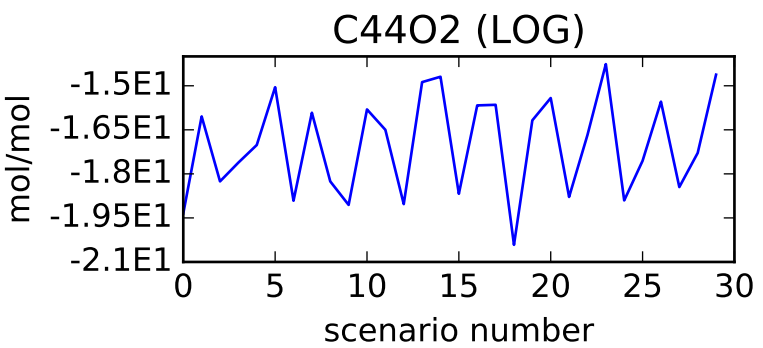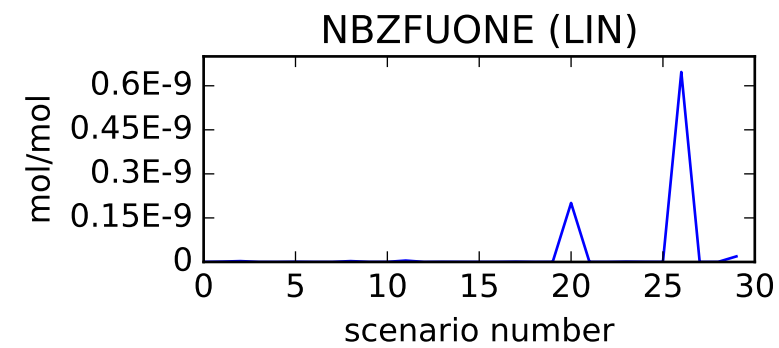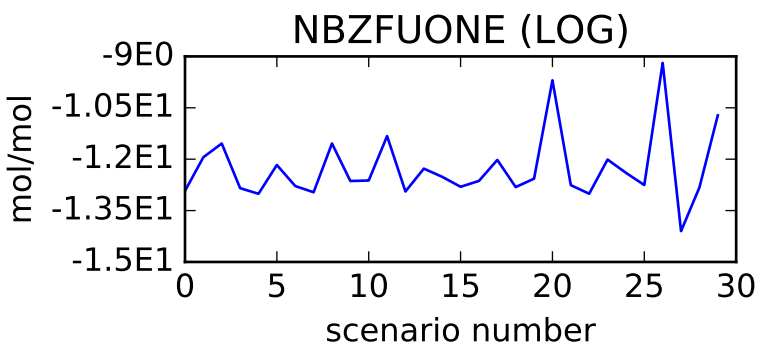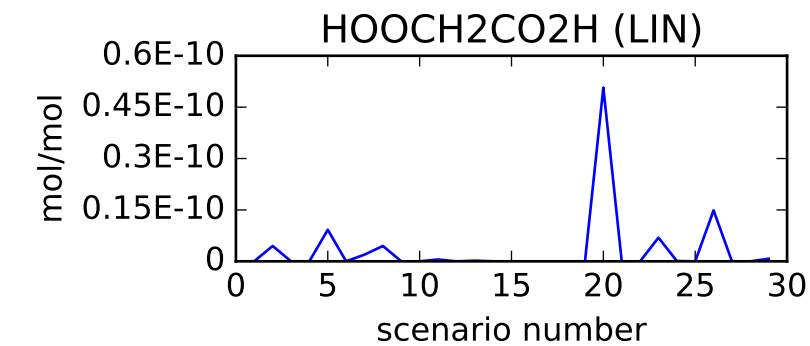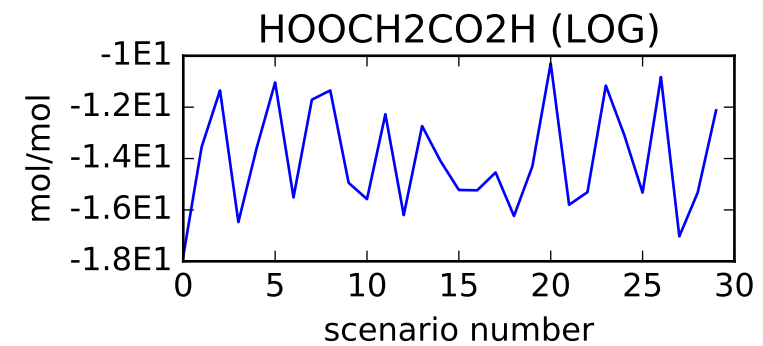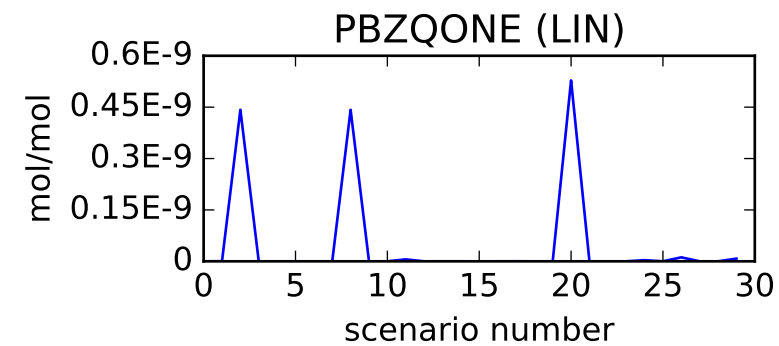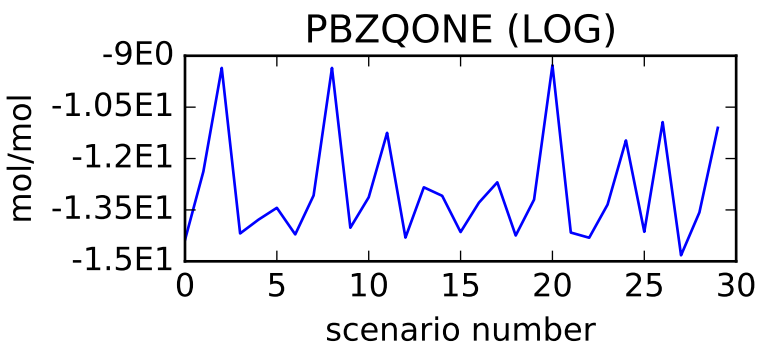



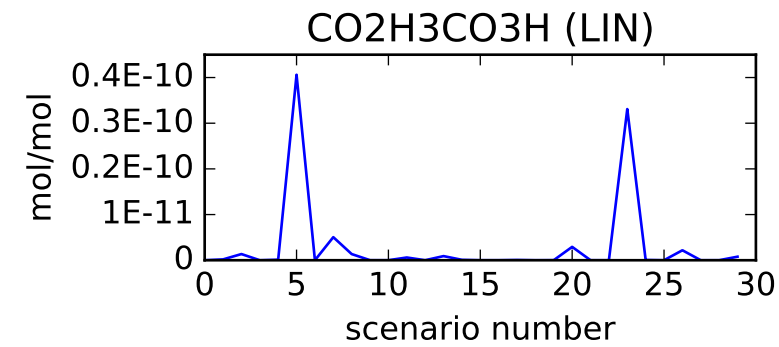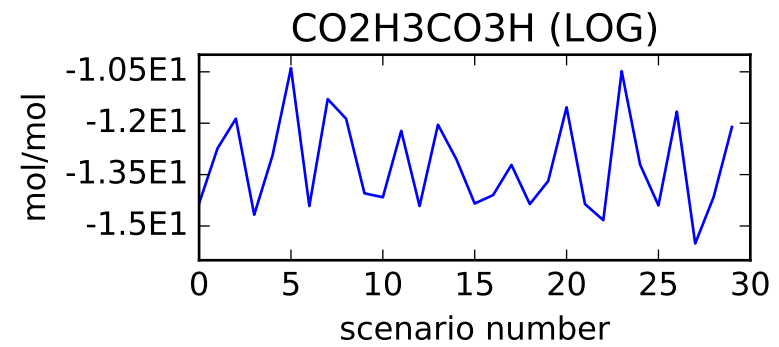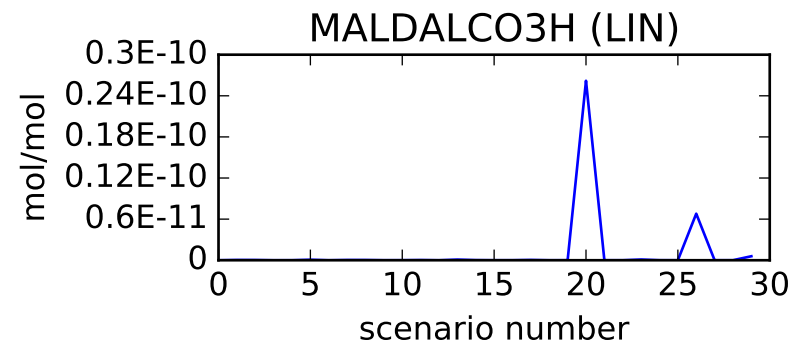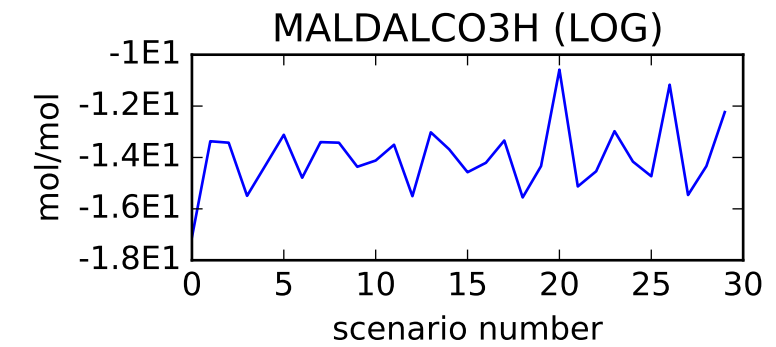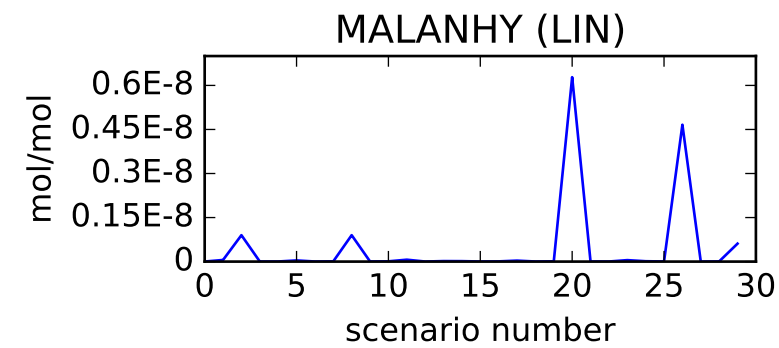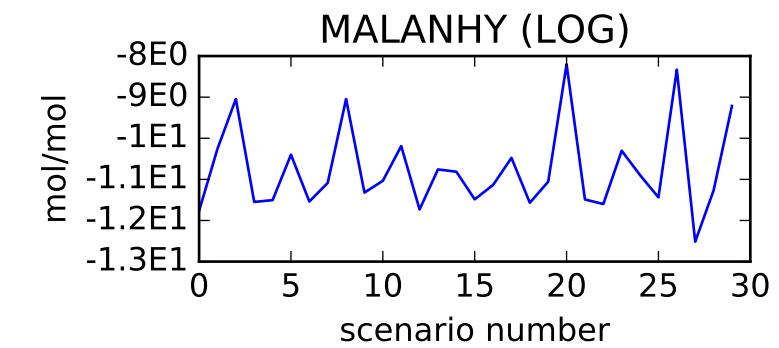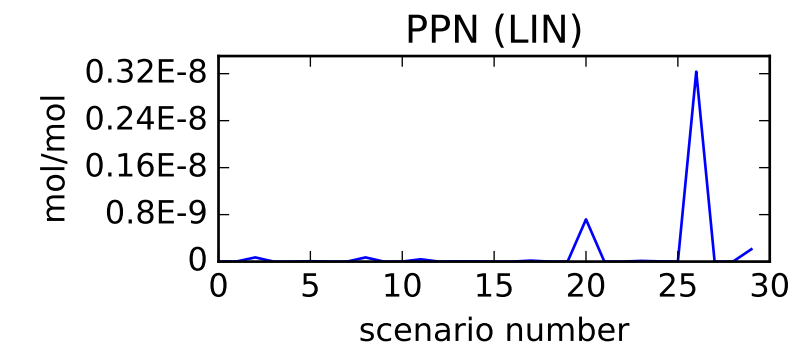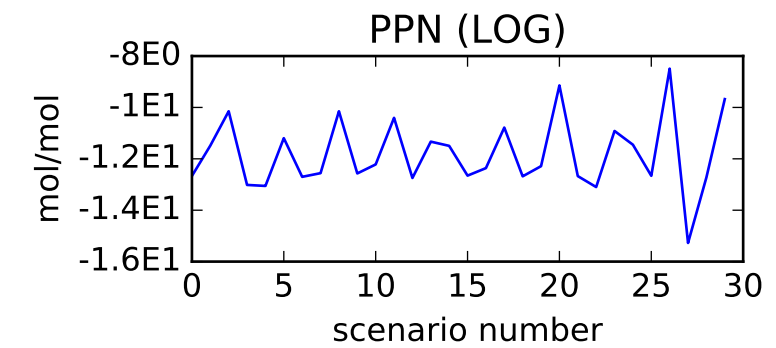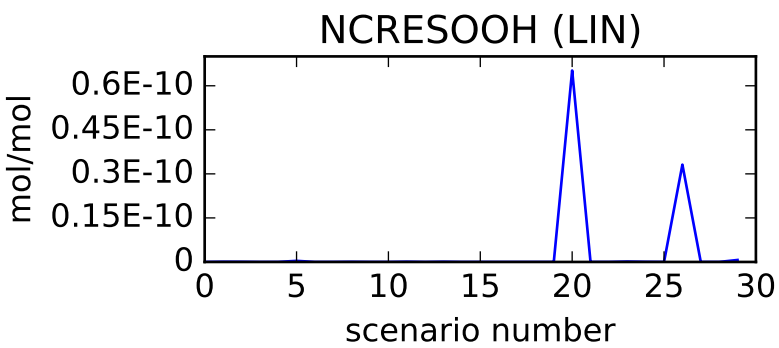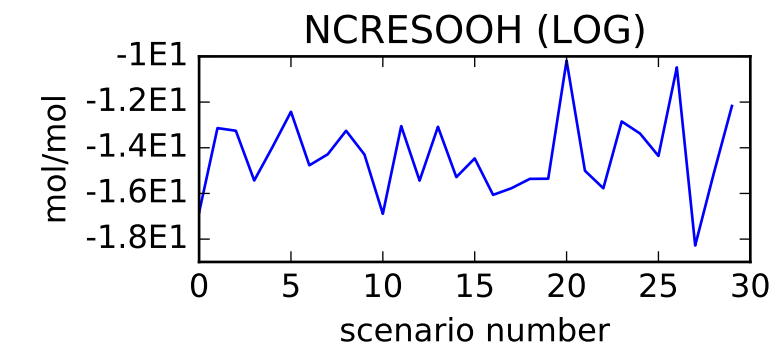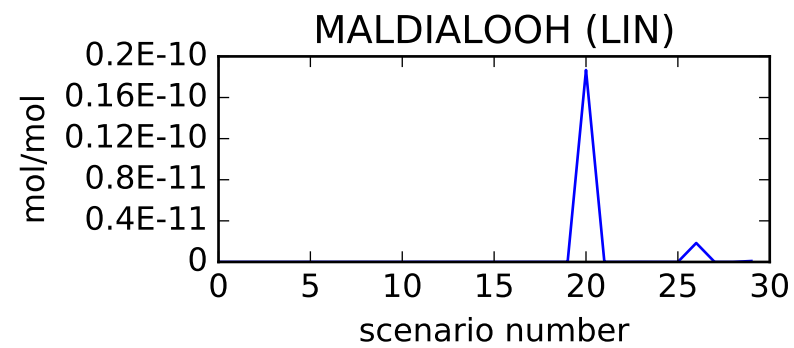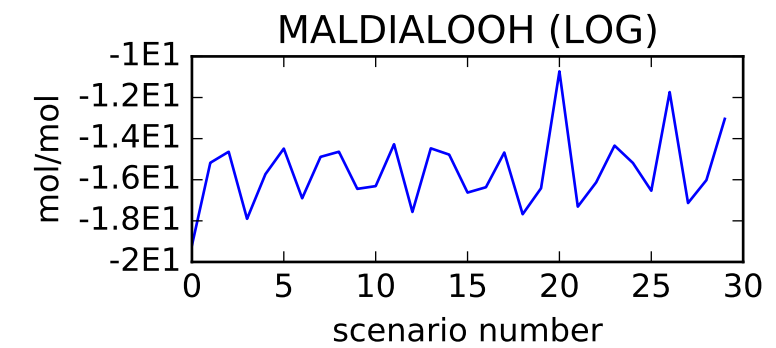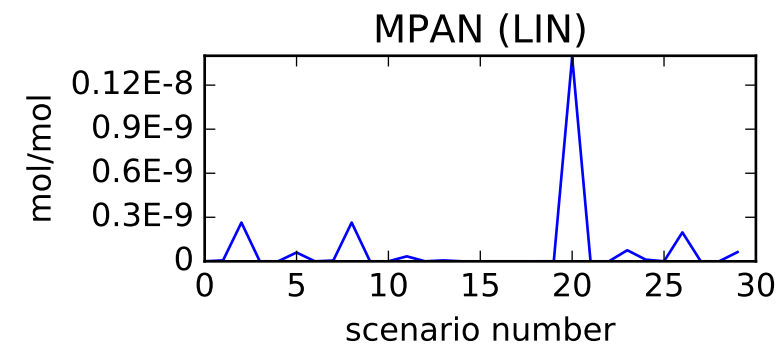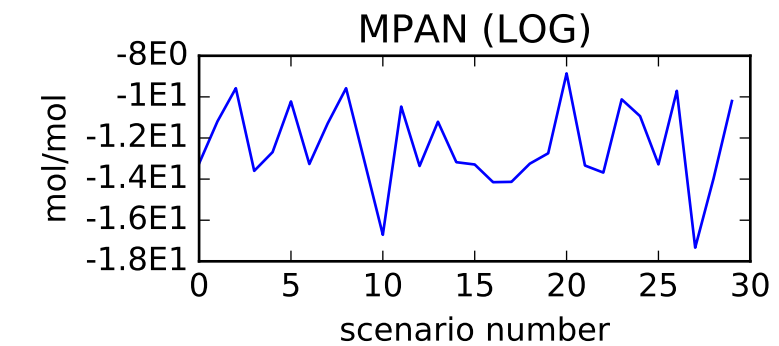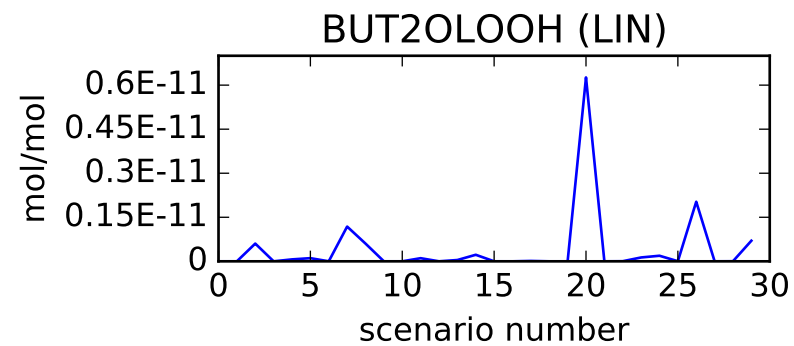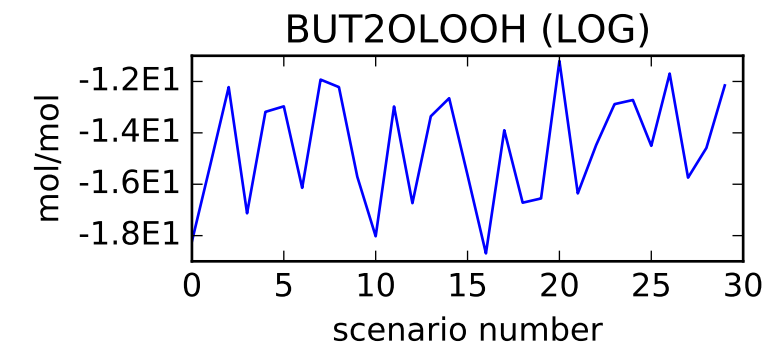

DB2OOH (LIN)

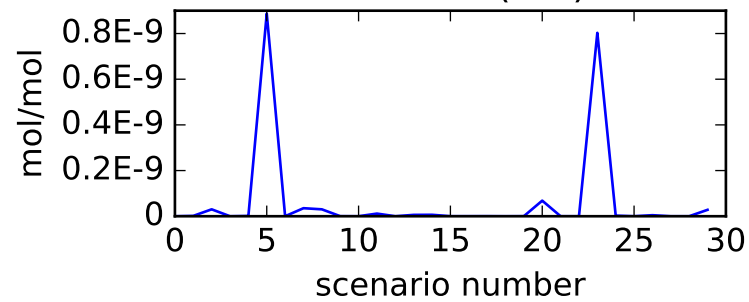

DB2OOH (LOG)

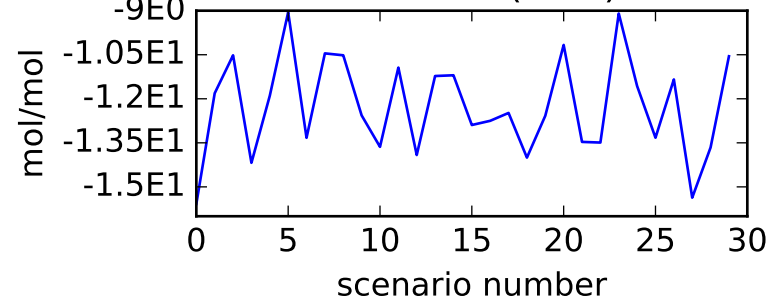

CI2 (LIN)

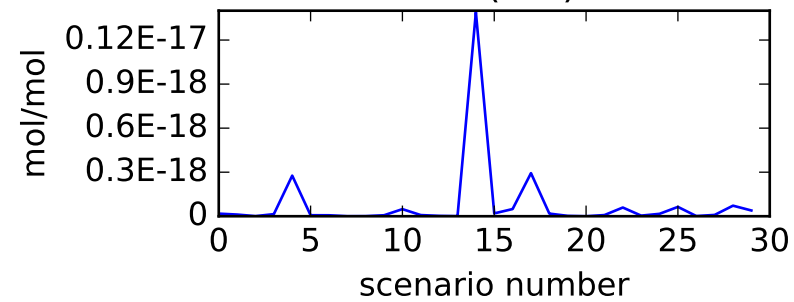

CI2 (LOG)

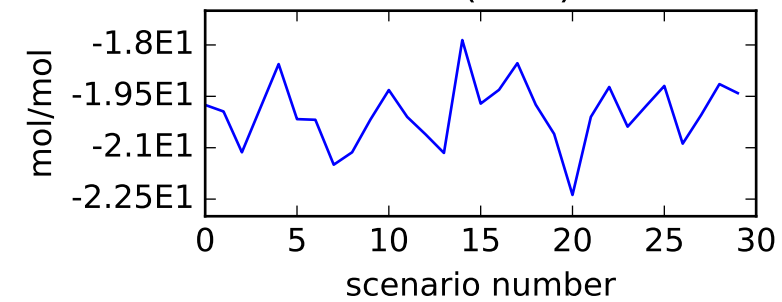

C54CO (LIN)

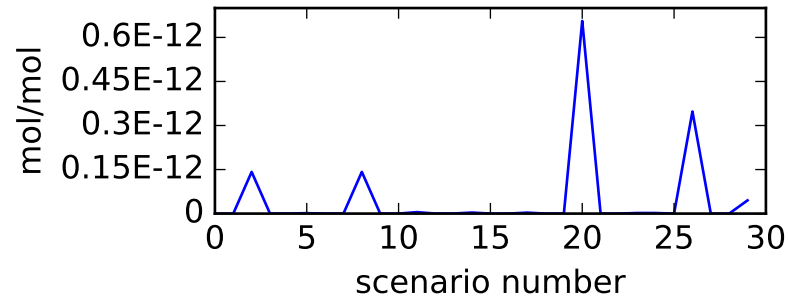

C54CO (LOG)

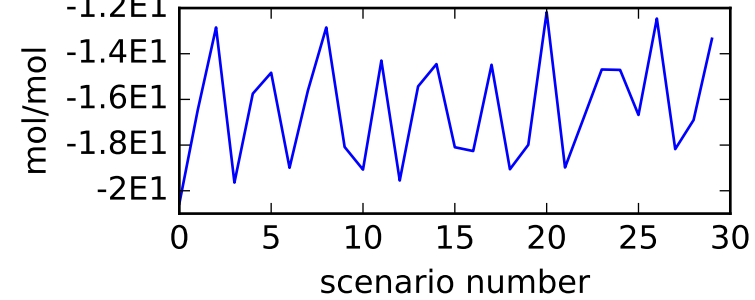

BIACETOOH (LIN)

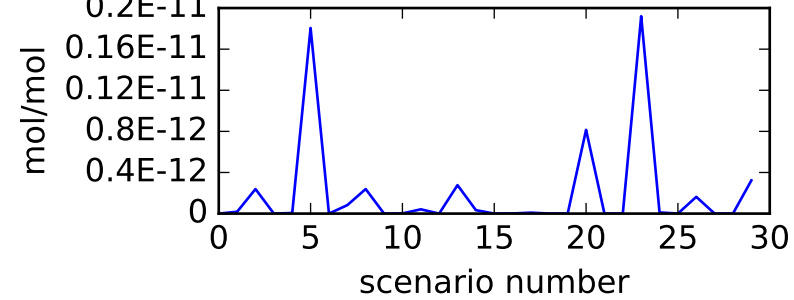

BIACETOOH (LOG)

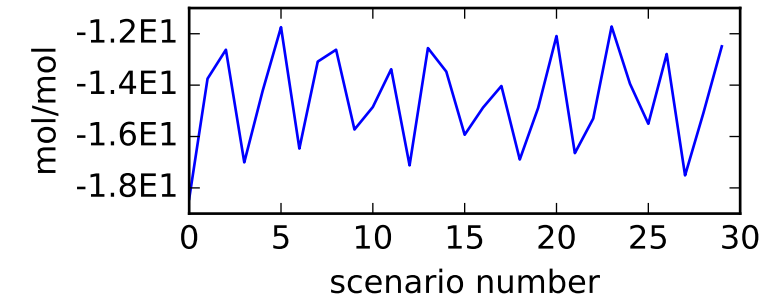

CH3O2NO2 (LIN)

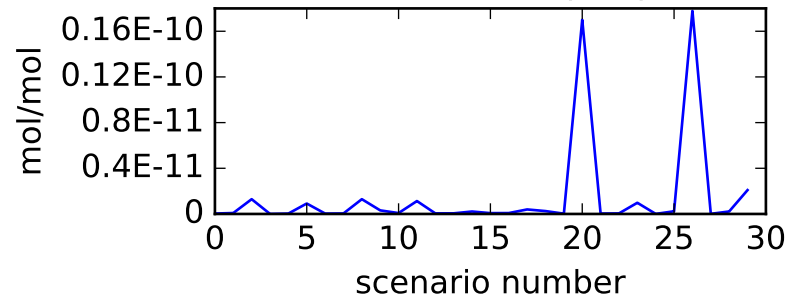

CH3O2NO2 (LOG)

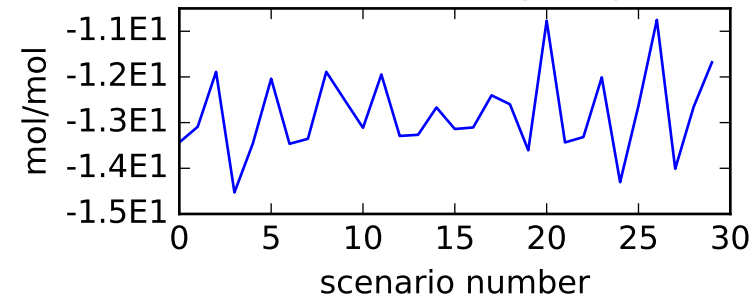

HOCH2O2NO2 (LIN)

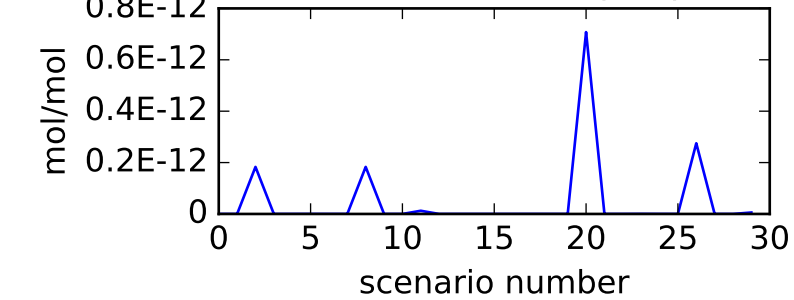

HOCH2O2NO2 (LOG)

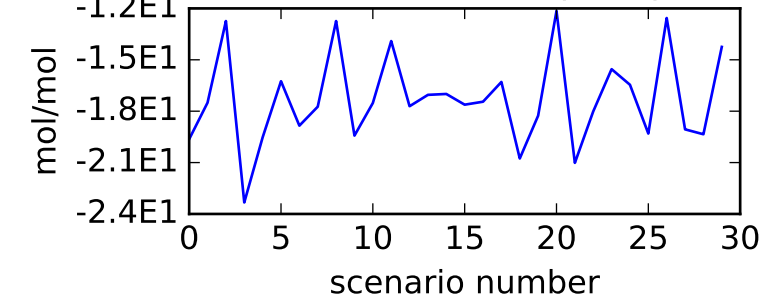

HYETHO2H (LIN)

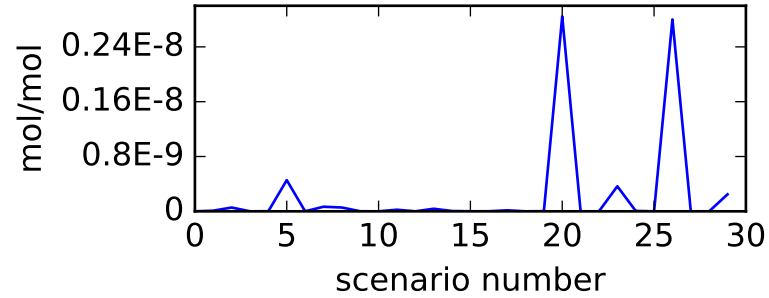

HYETHO2H (LOG)

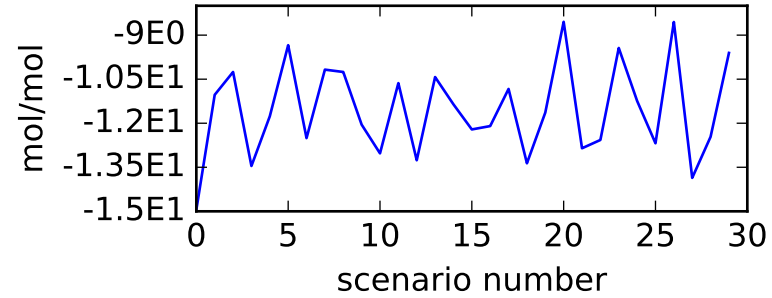

ETHOHNO3 (LIN)

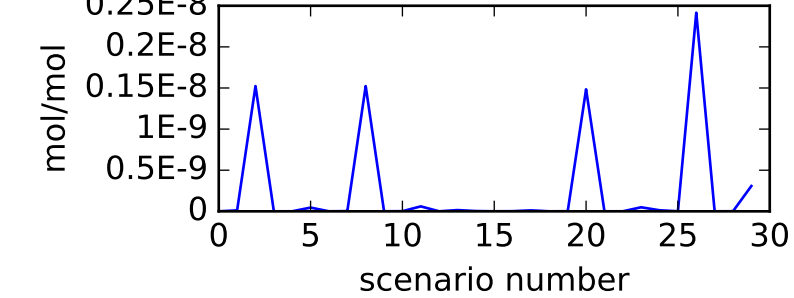

ETHOHNO3 (LOG)

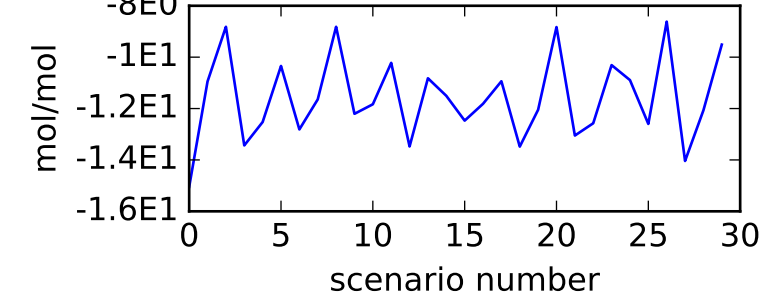

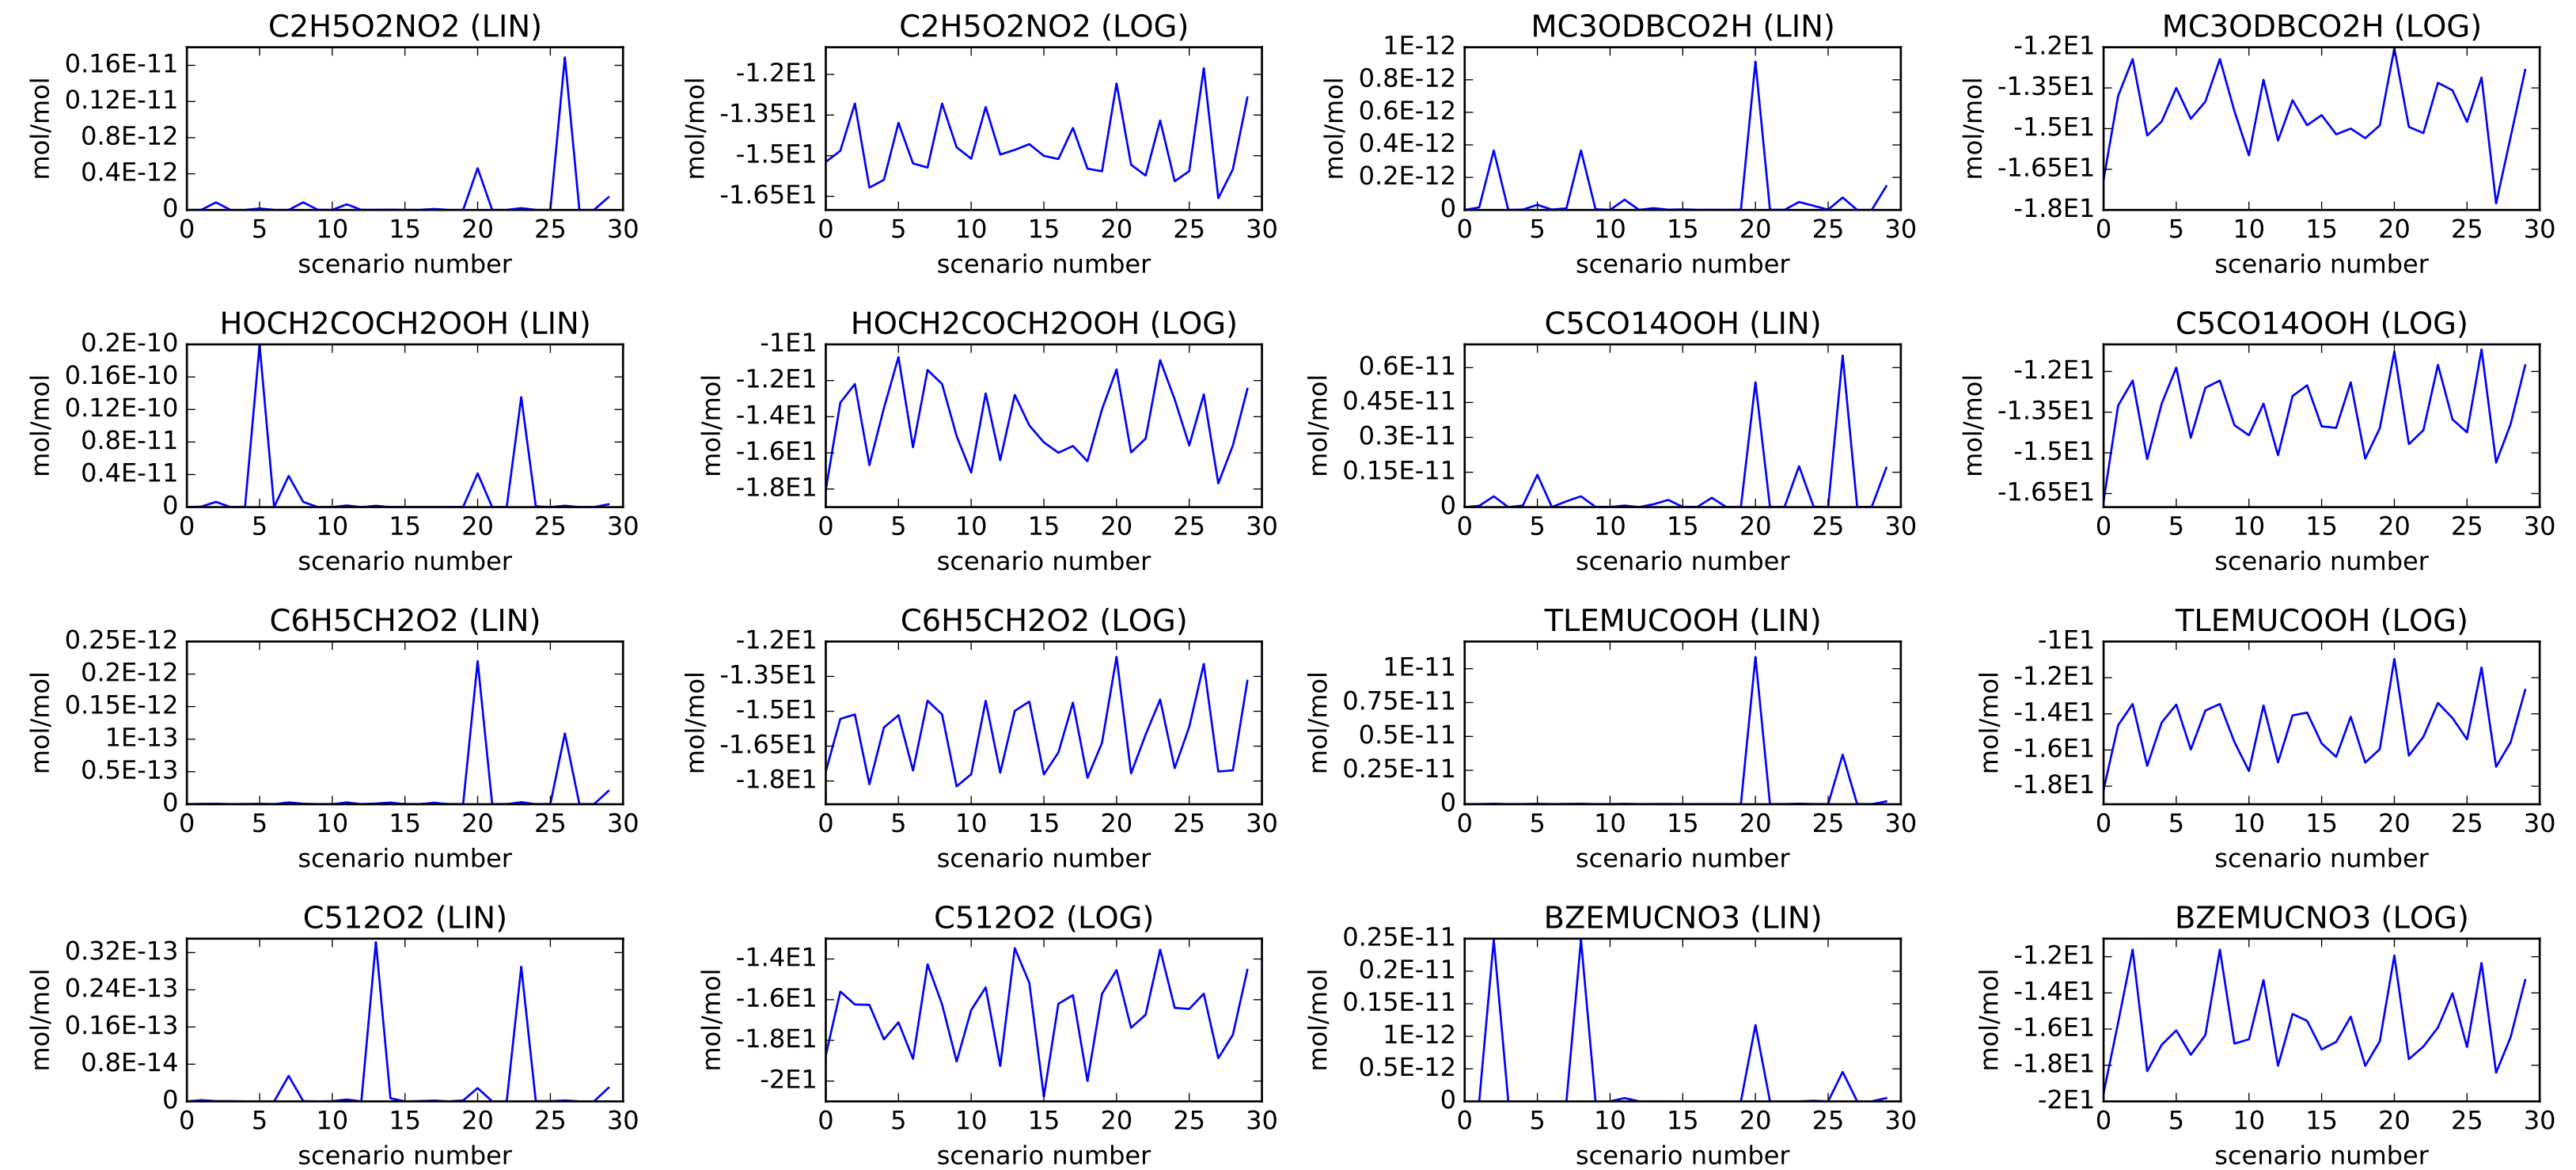

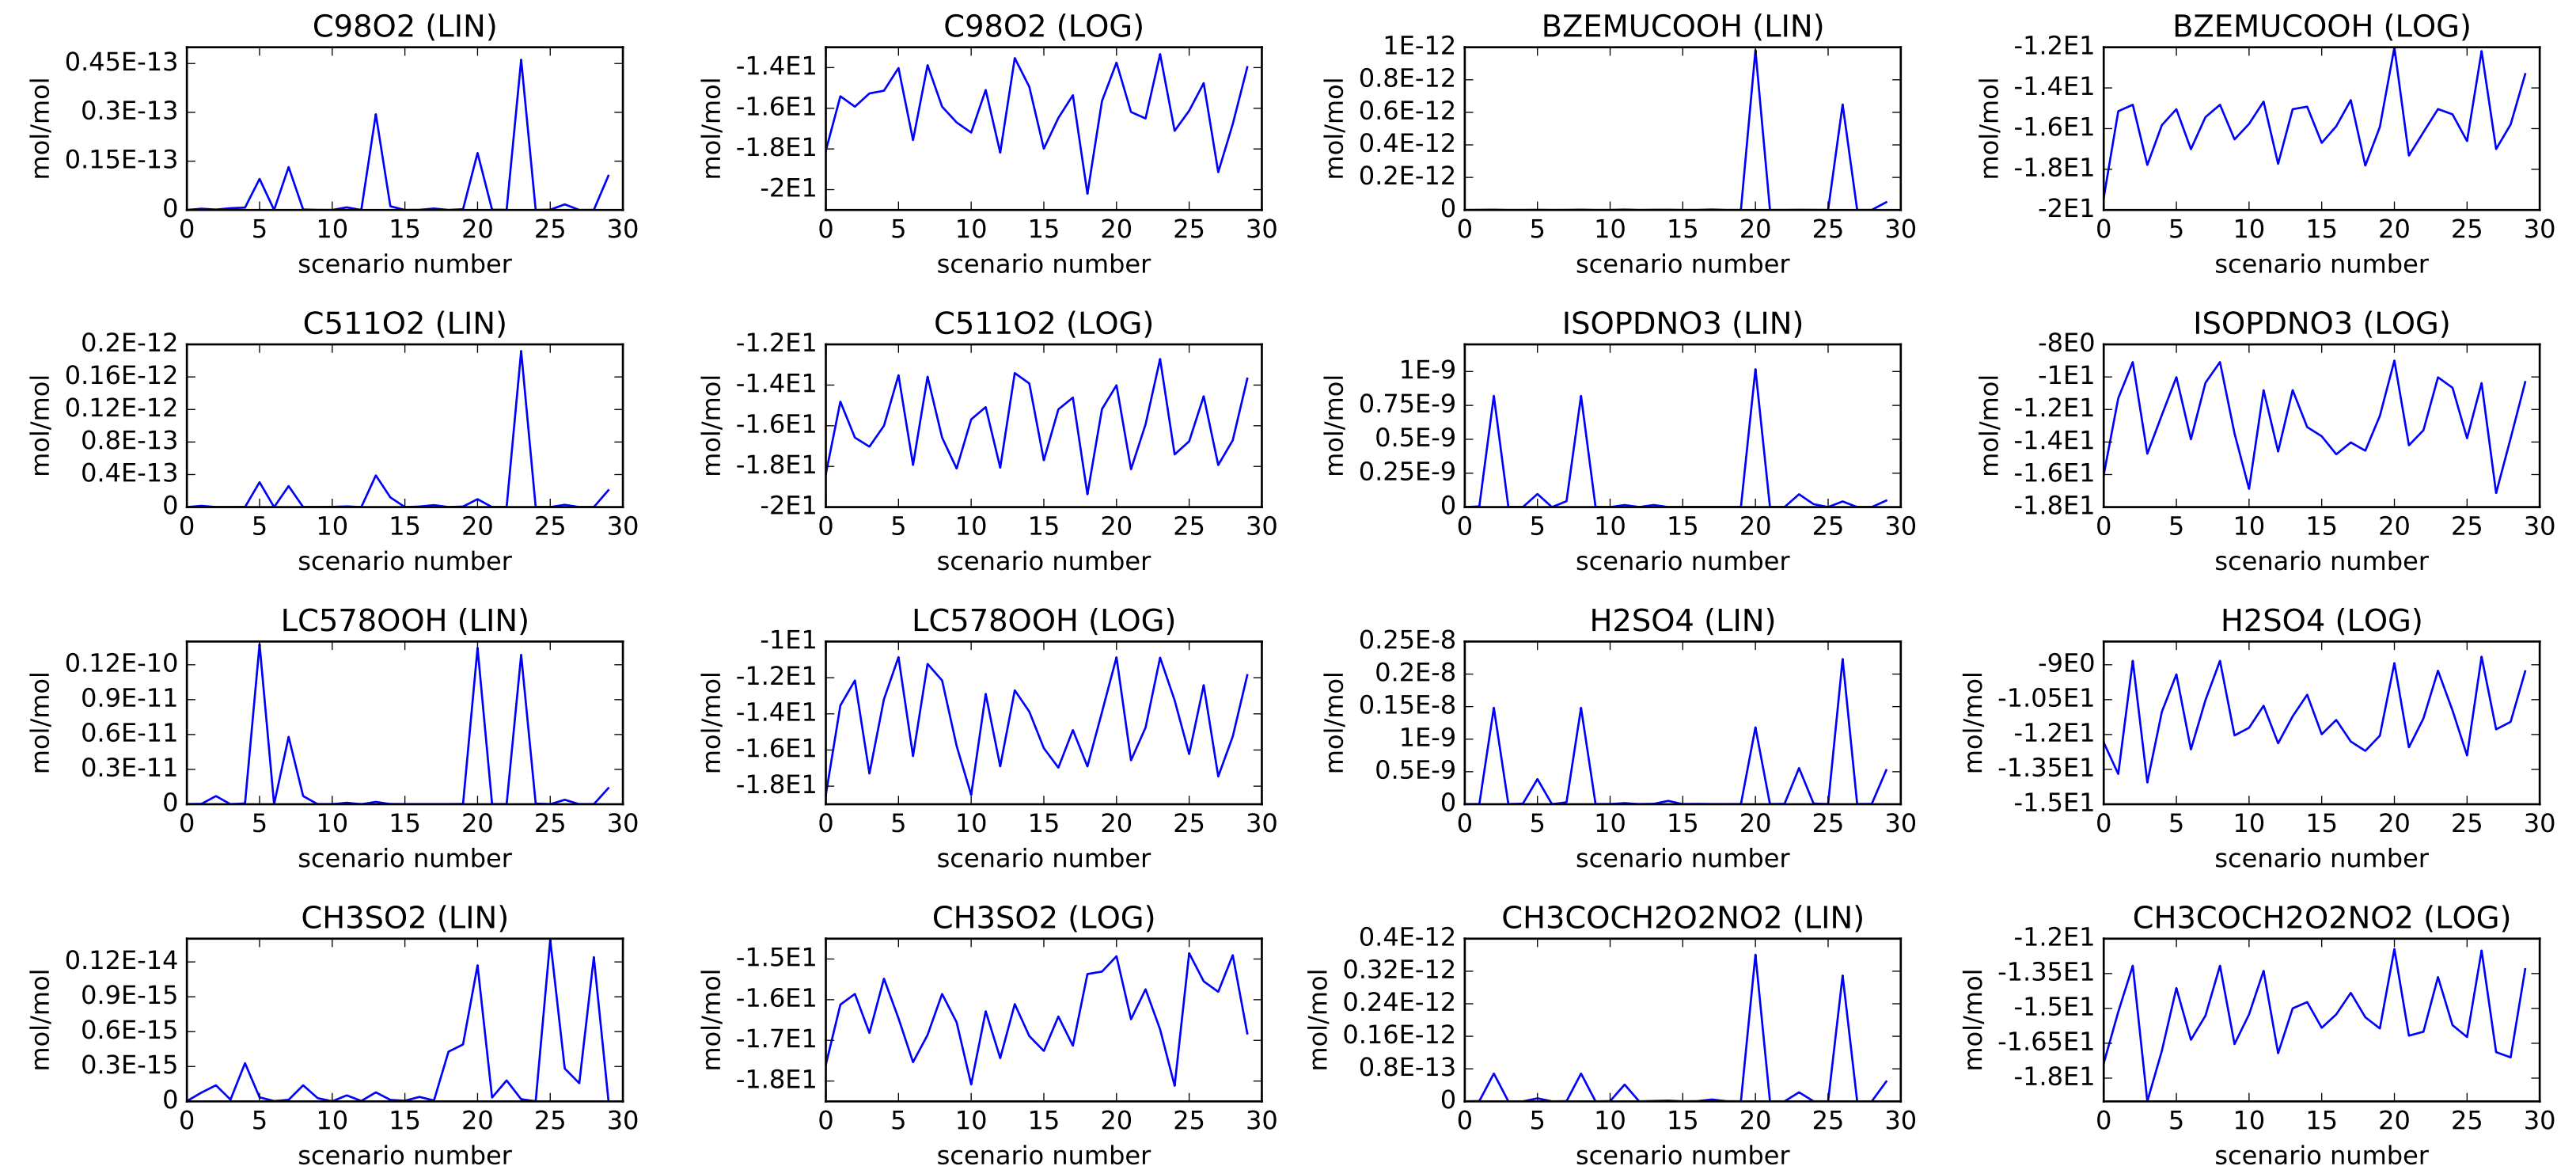

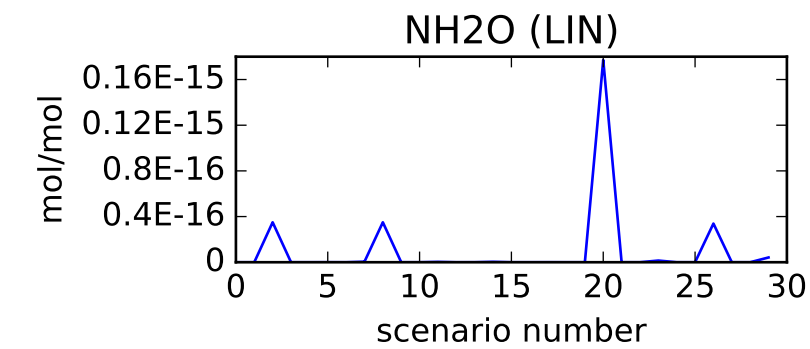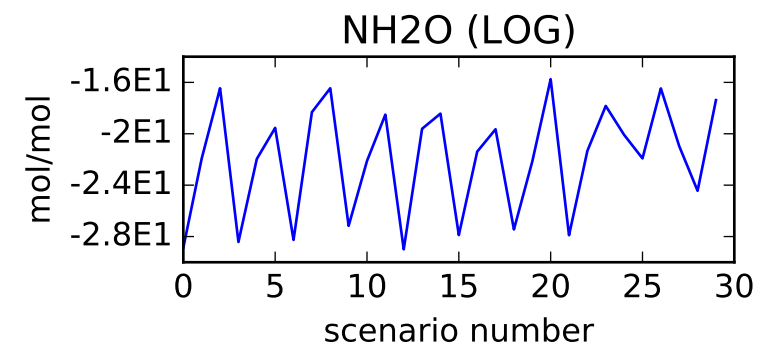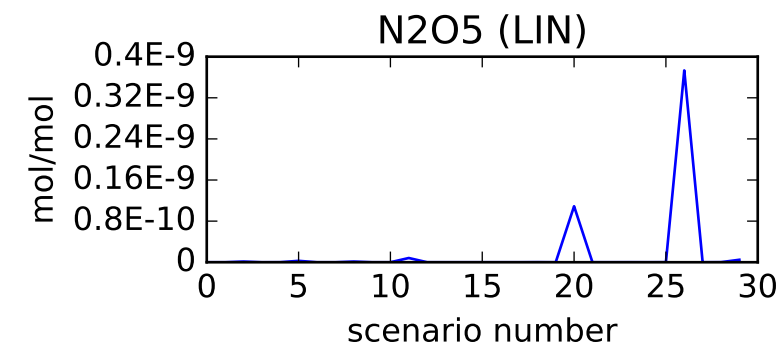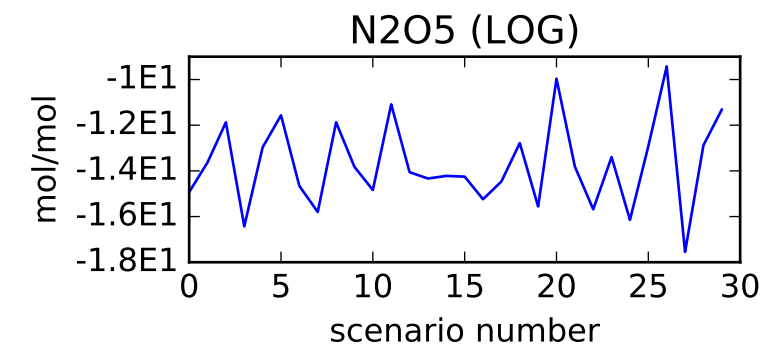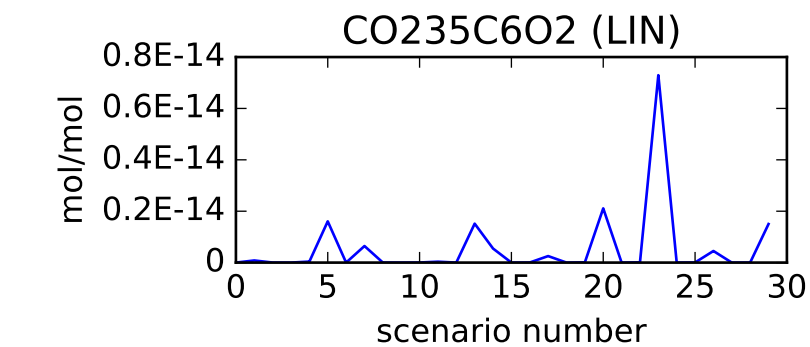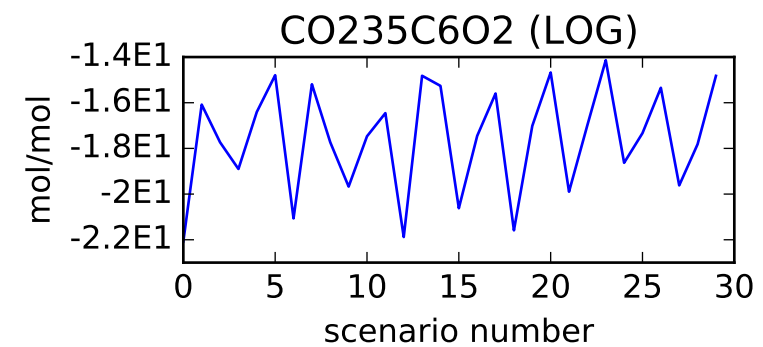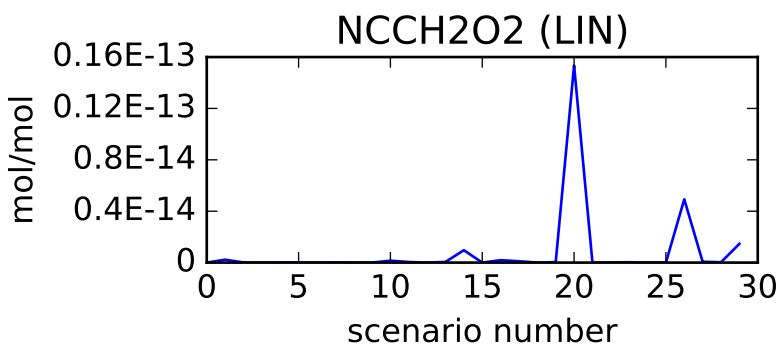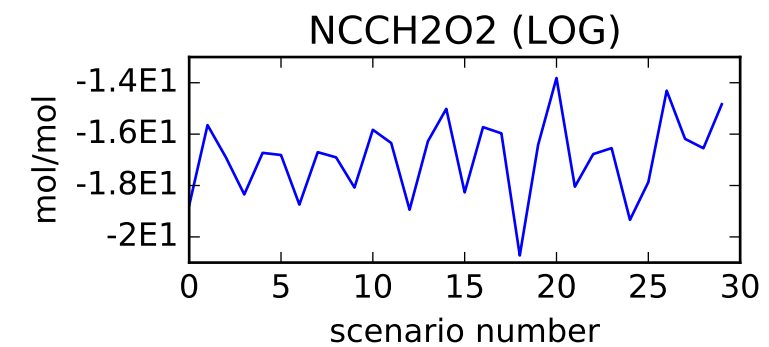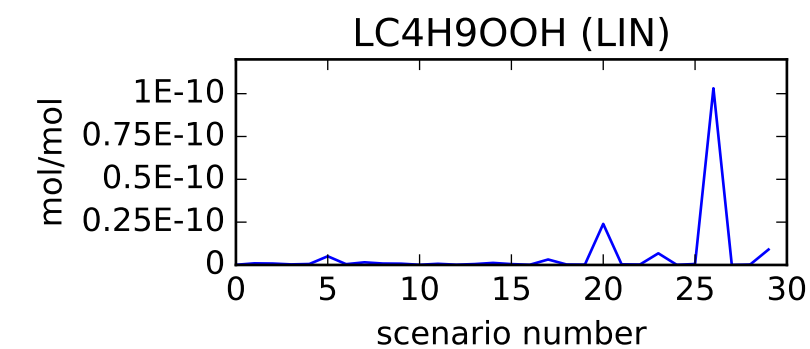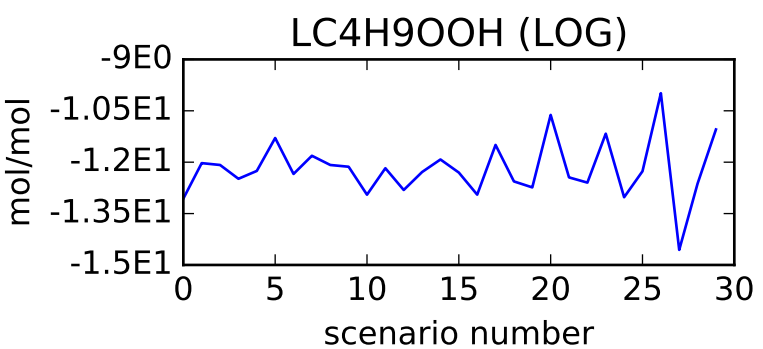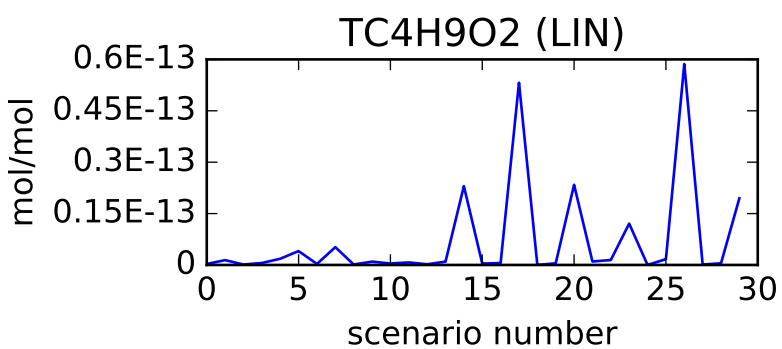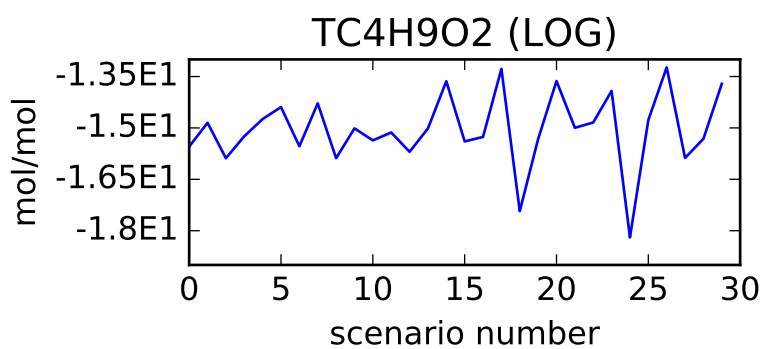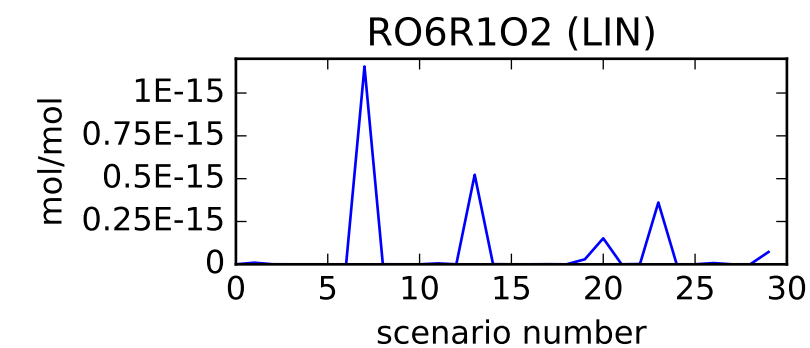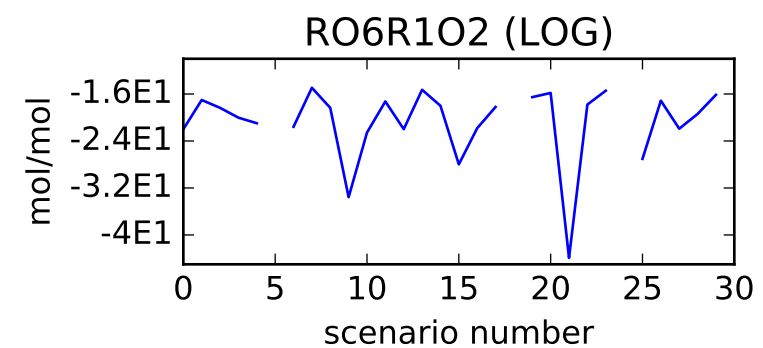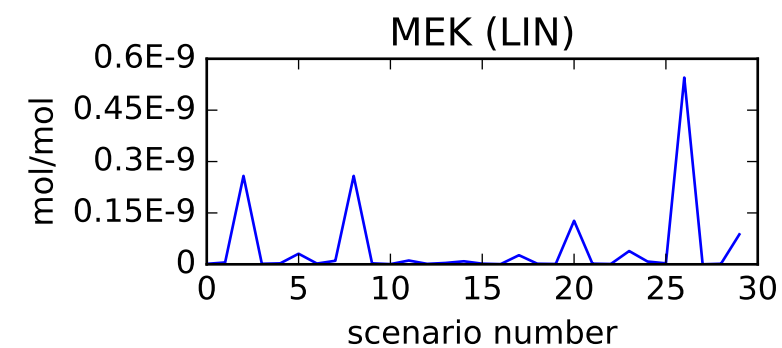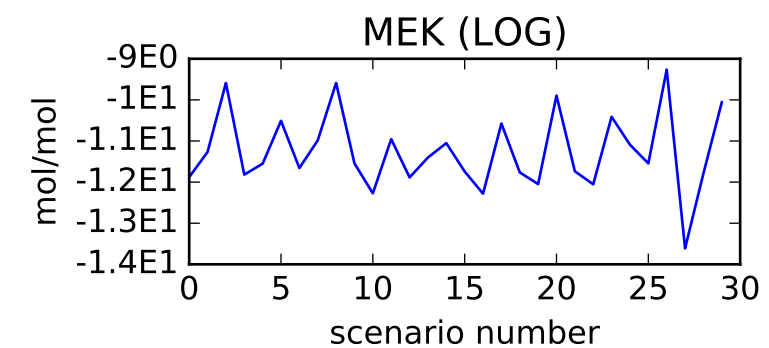

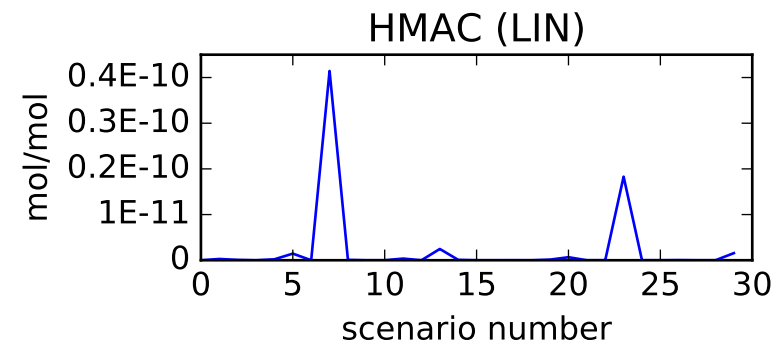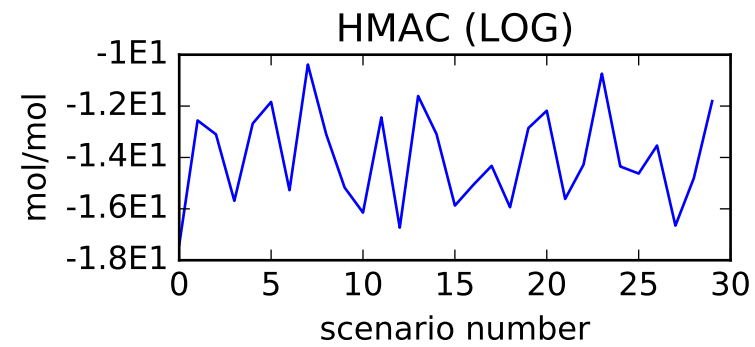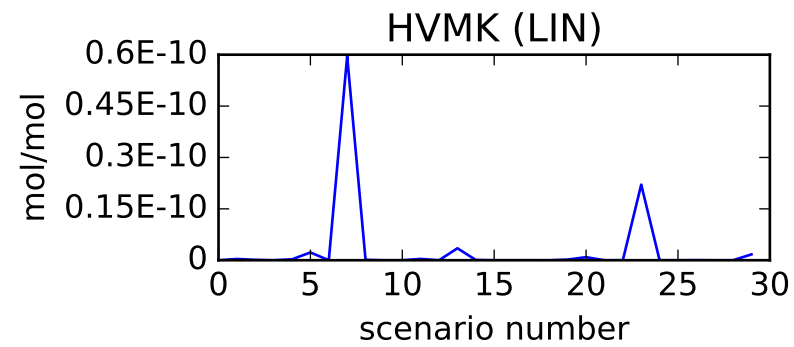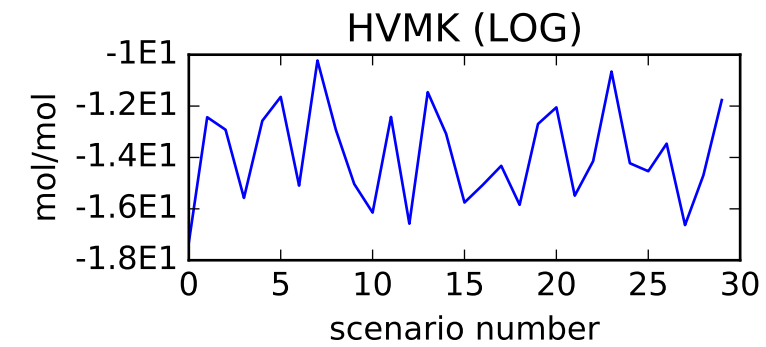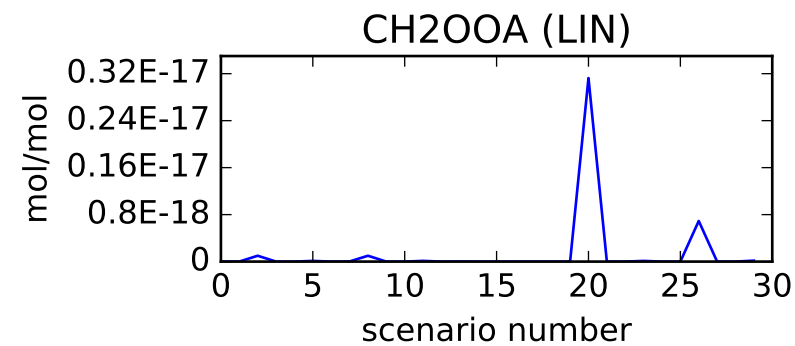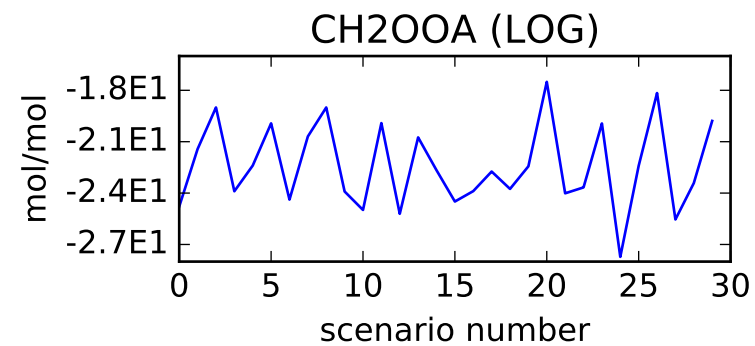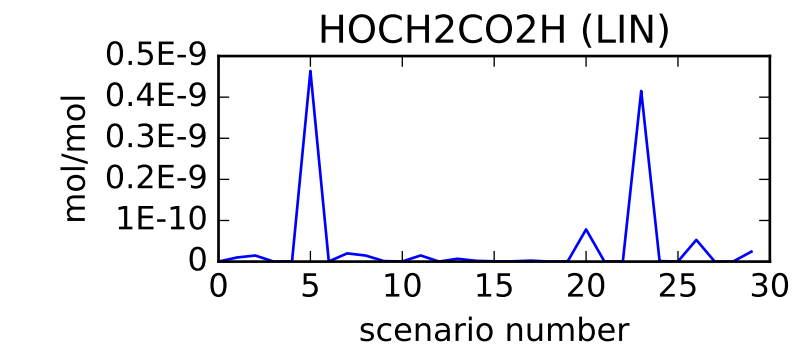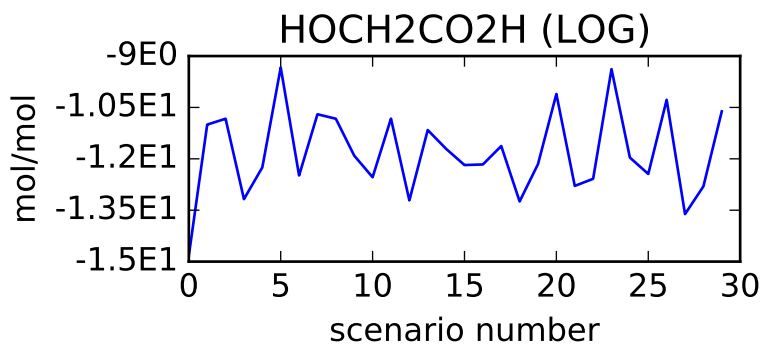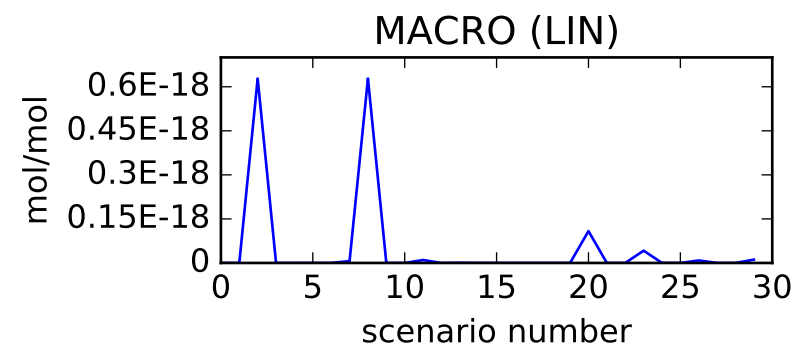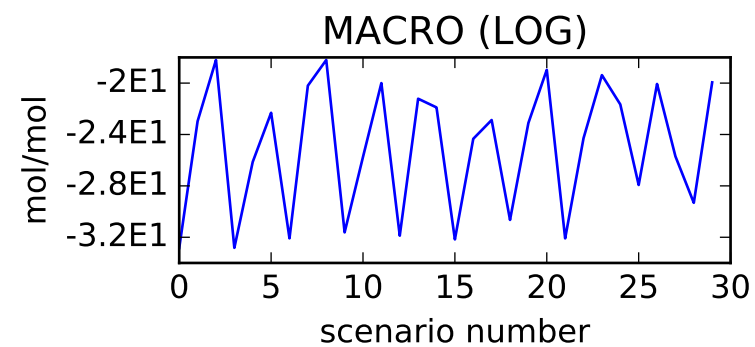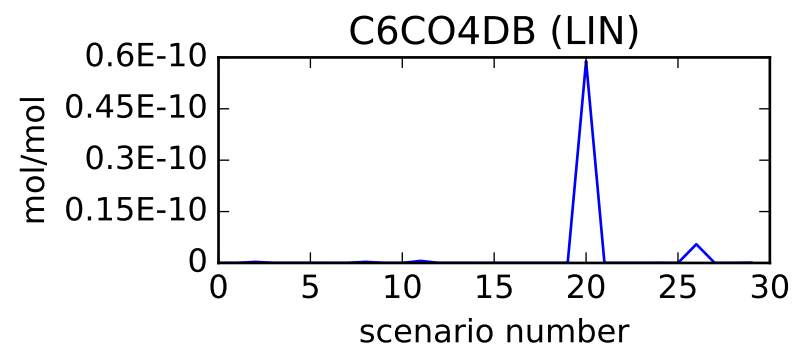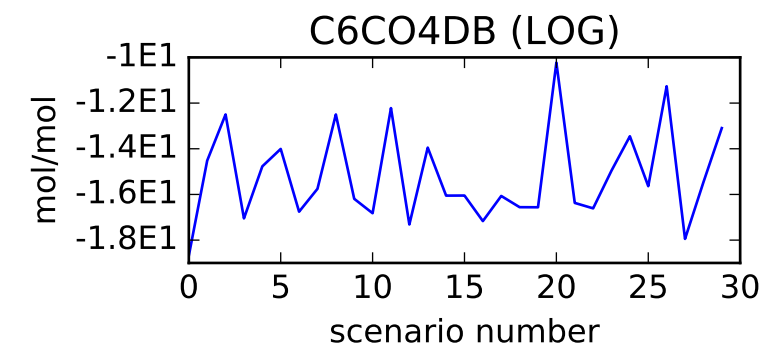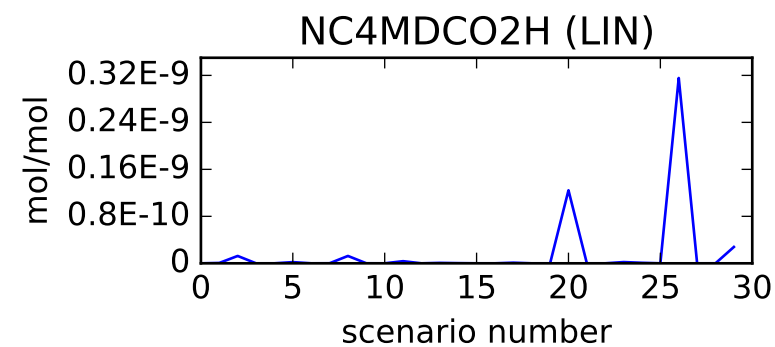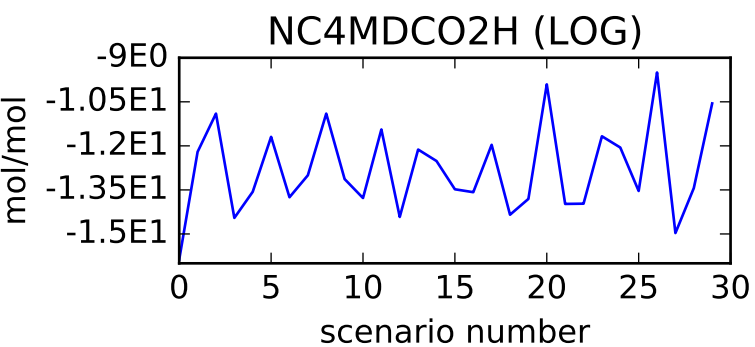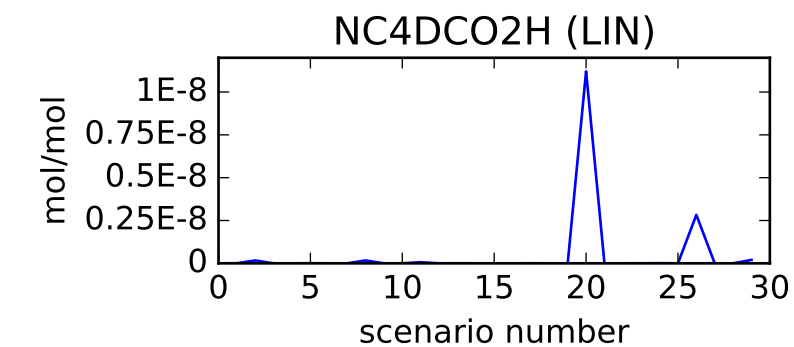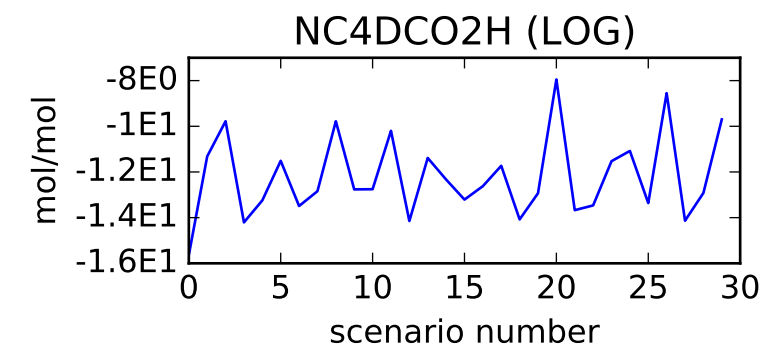



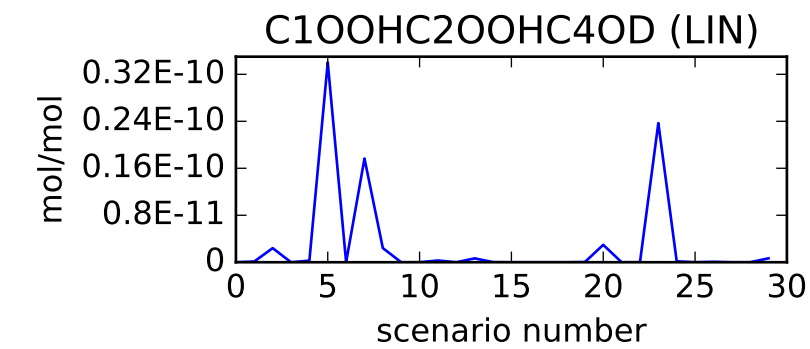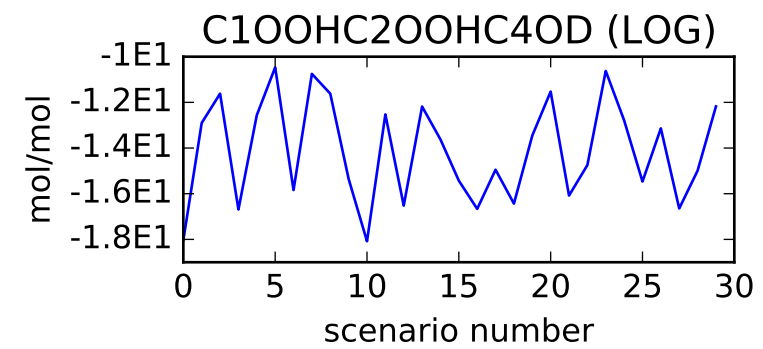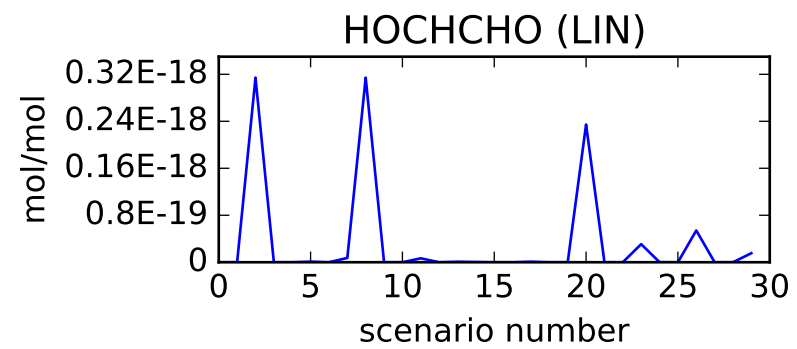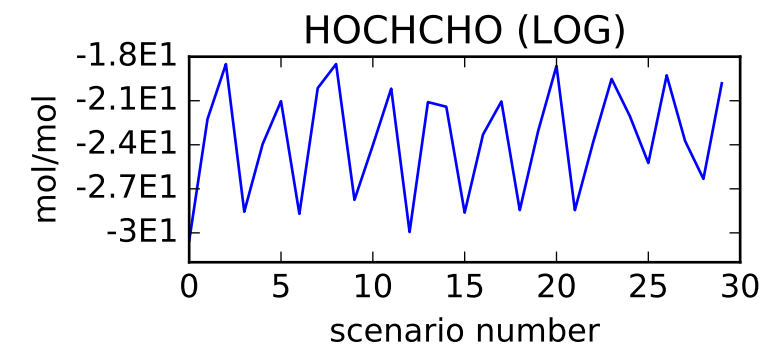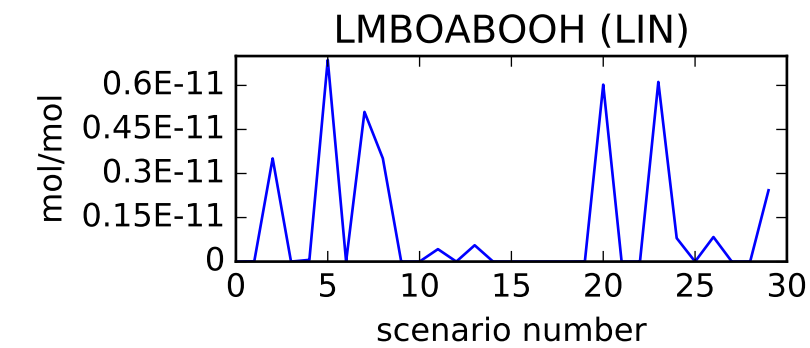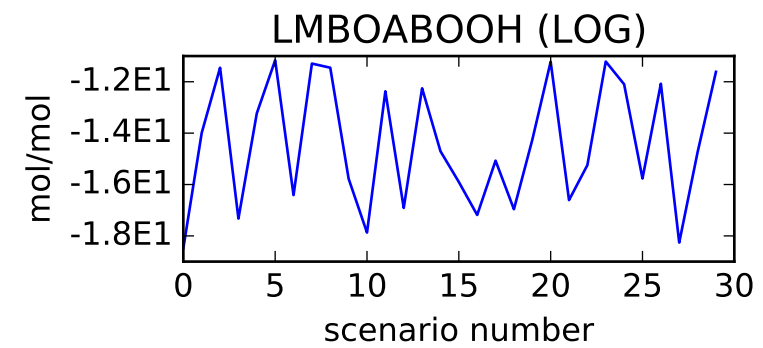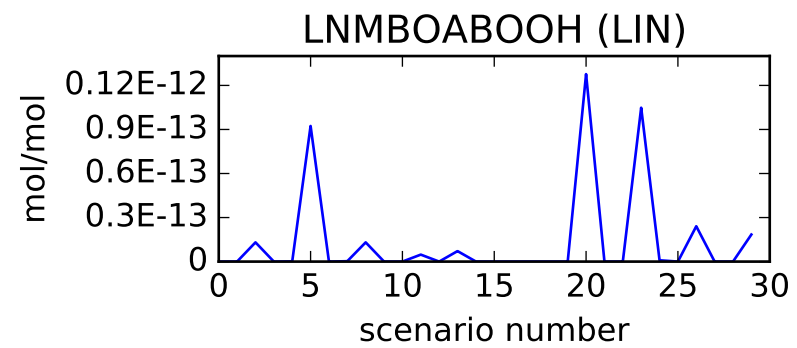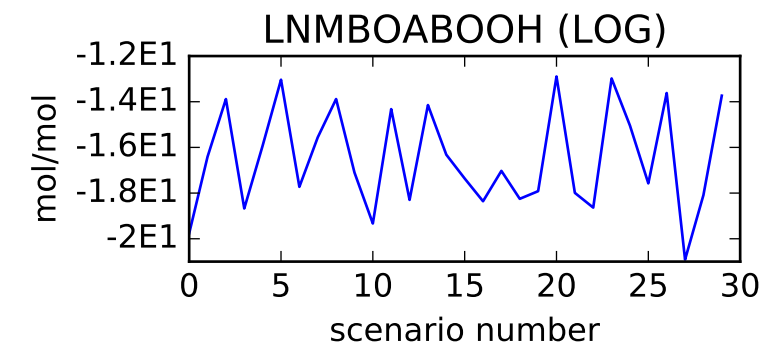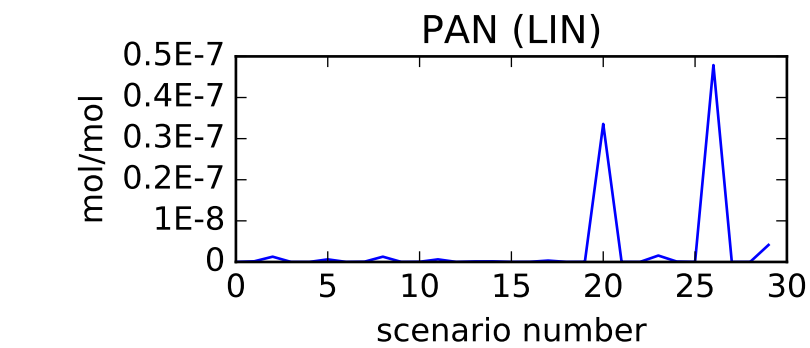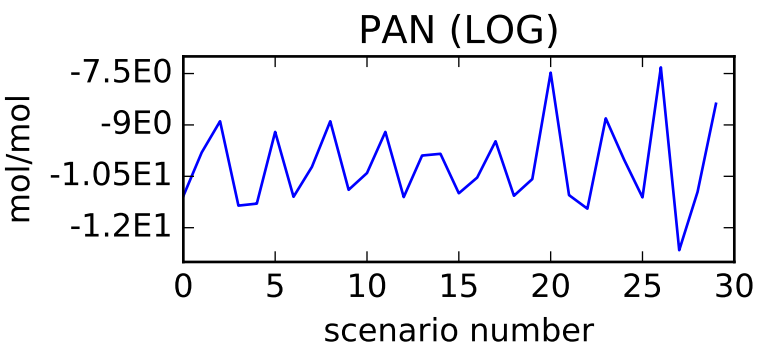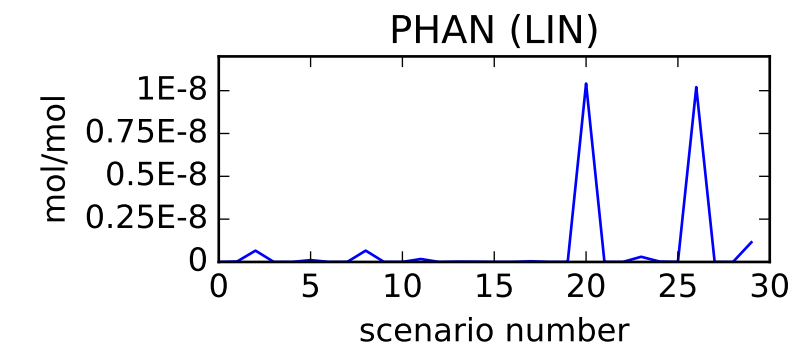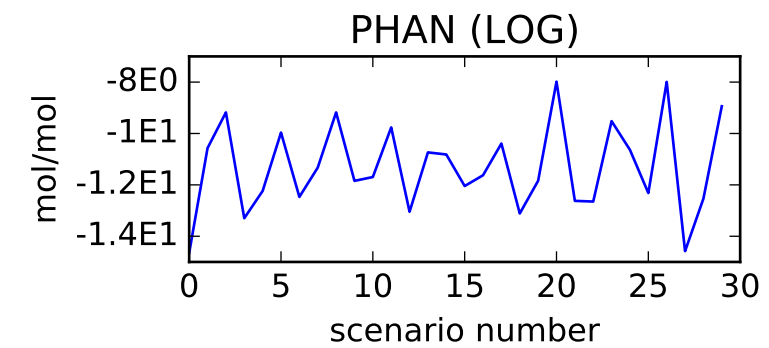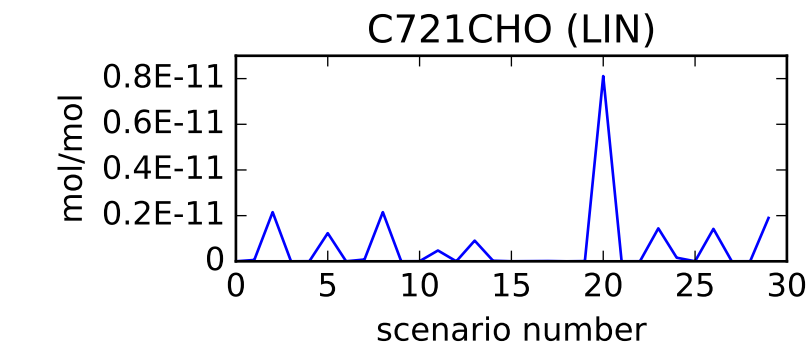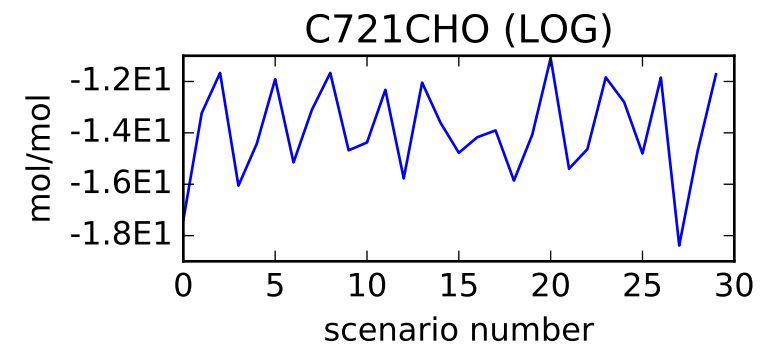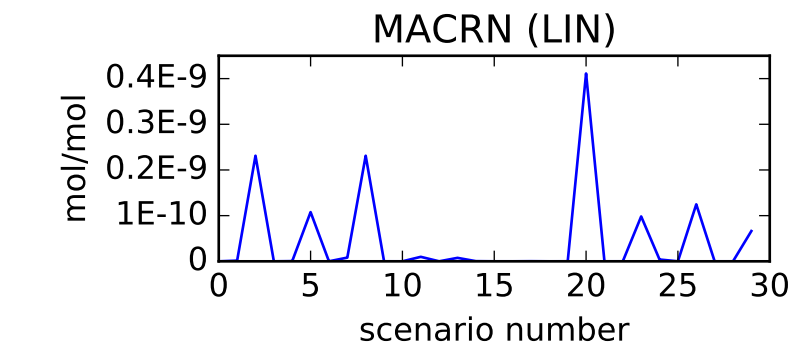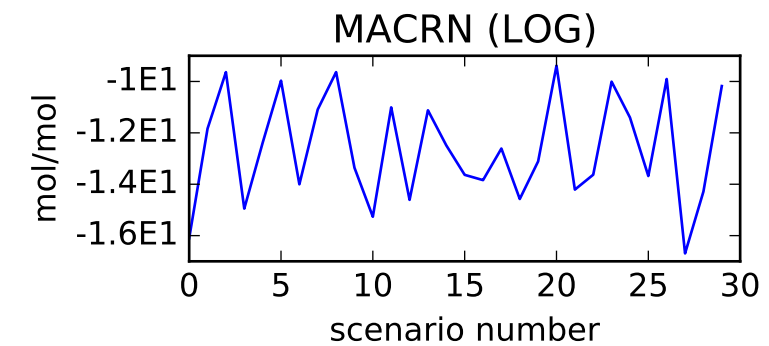

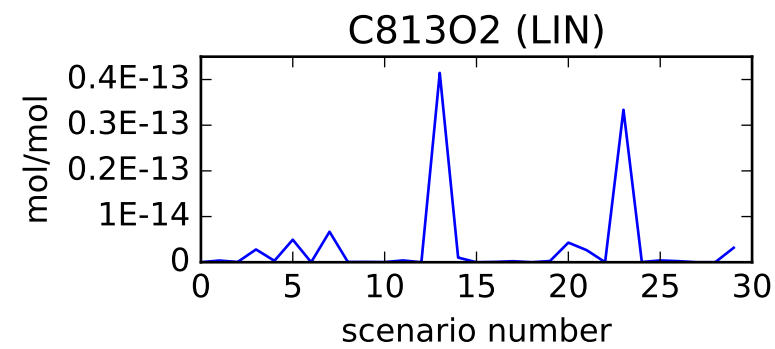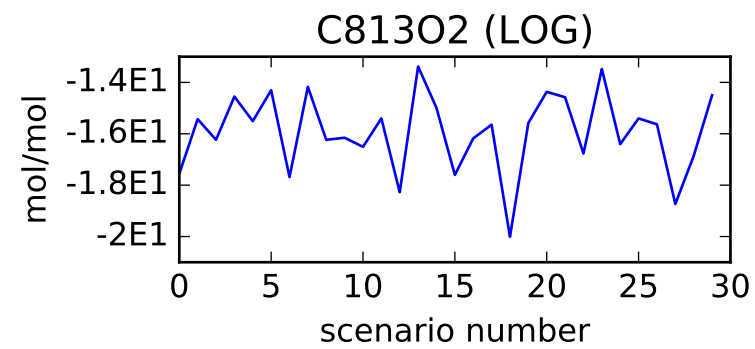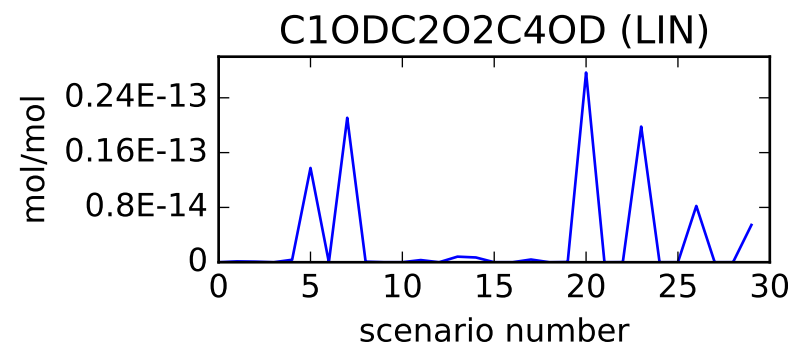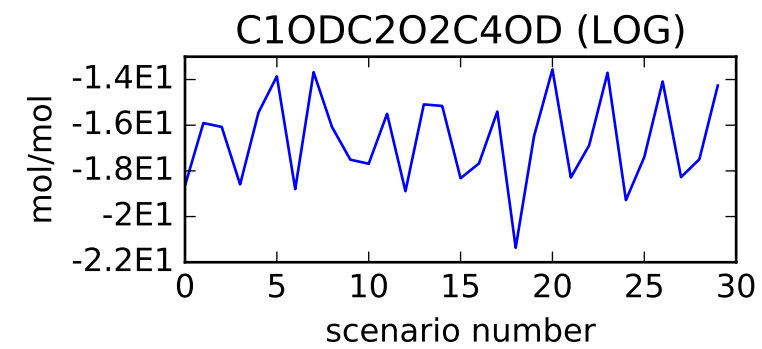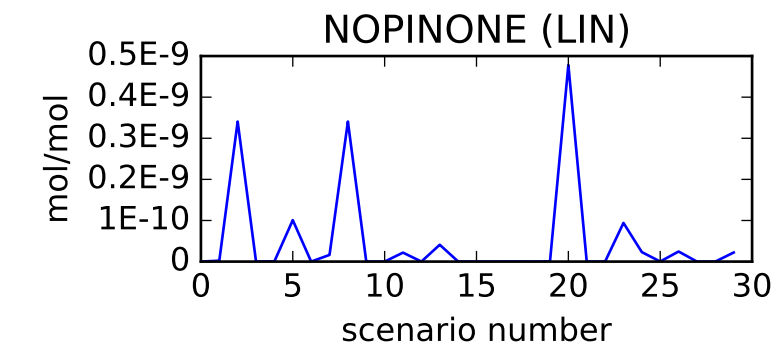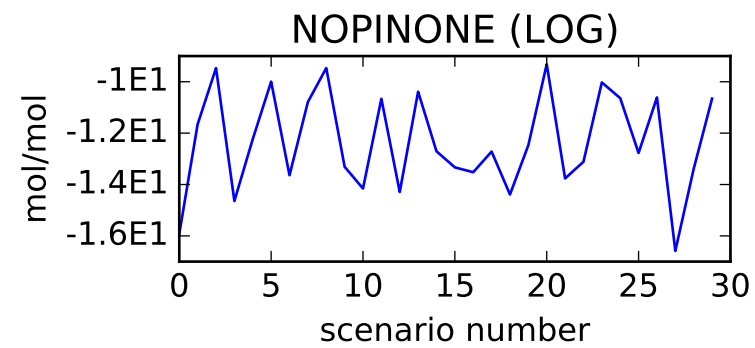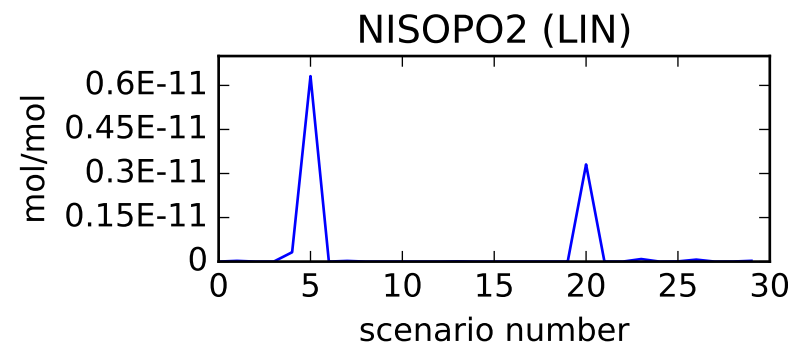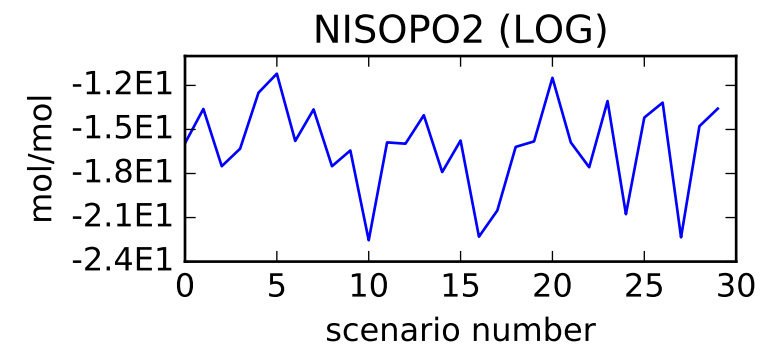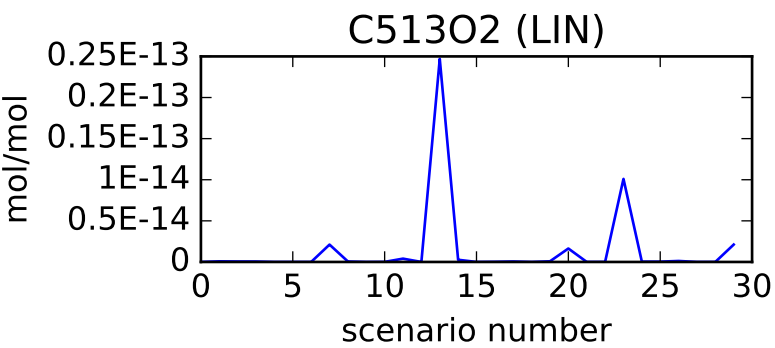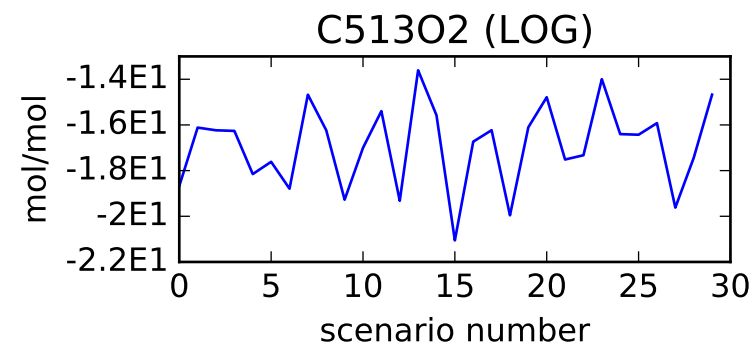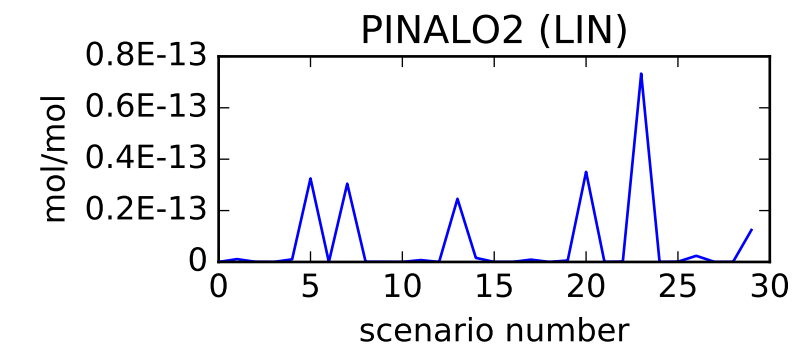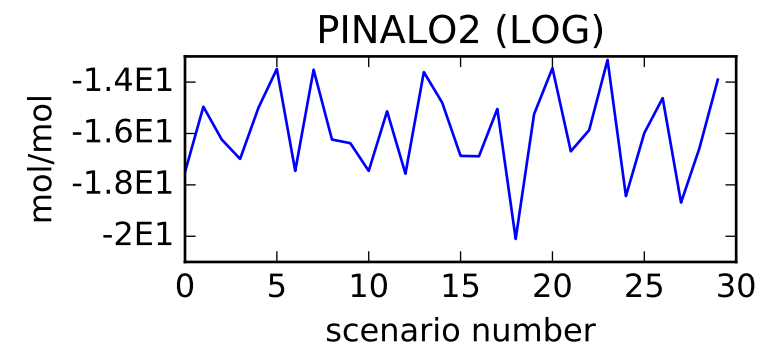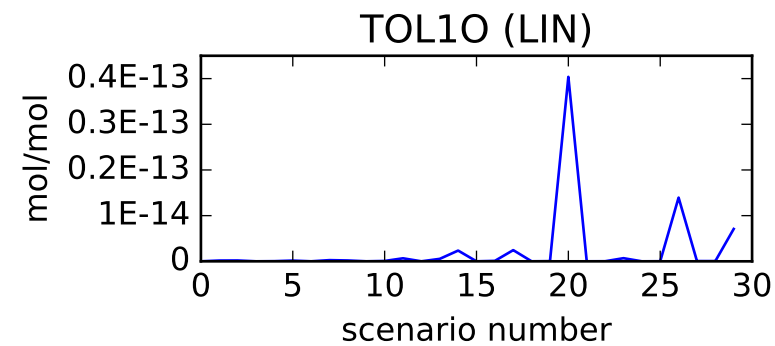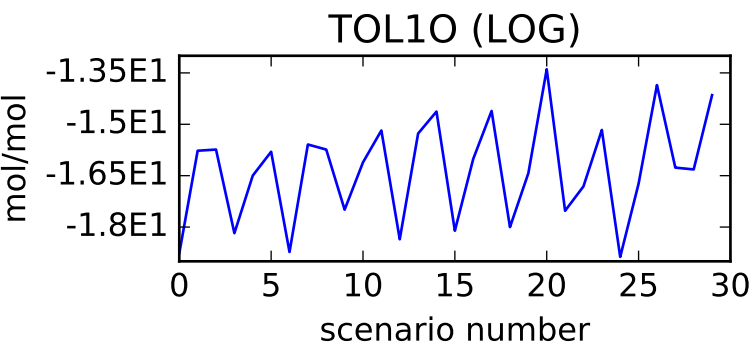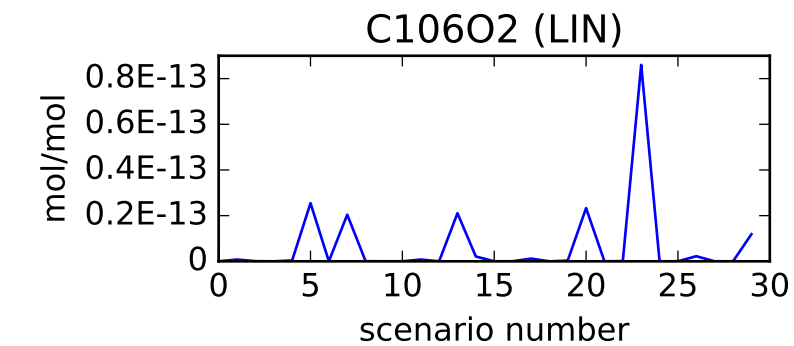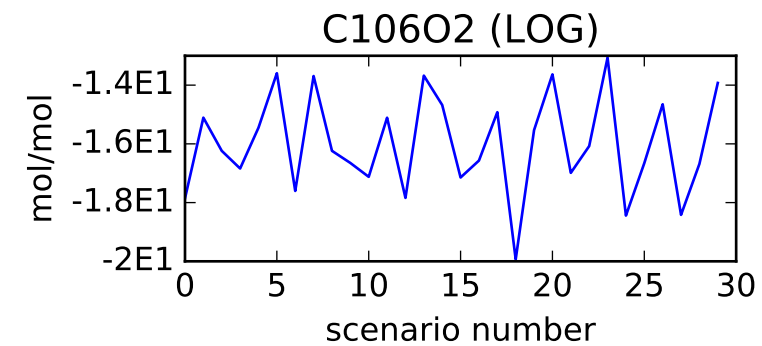

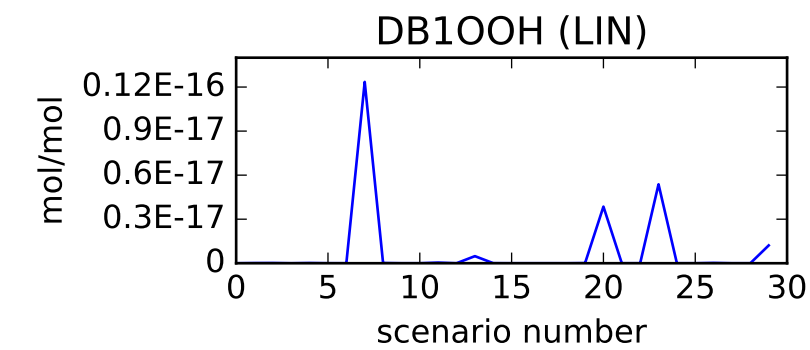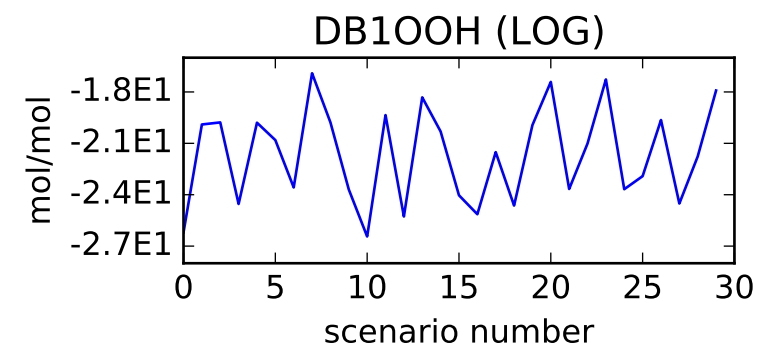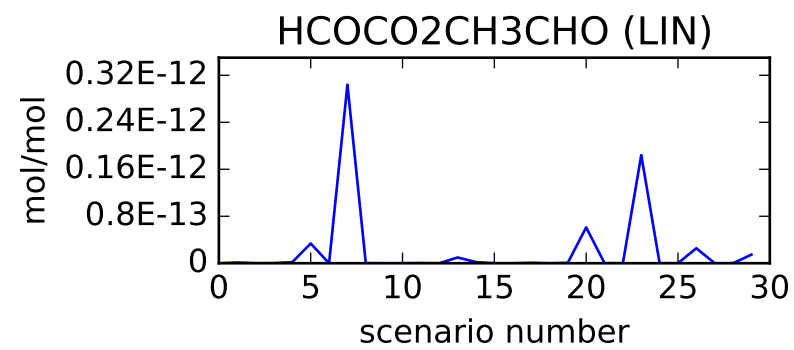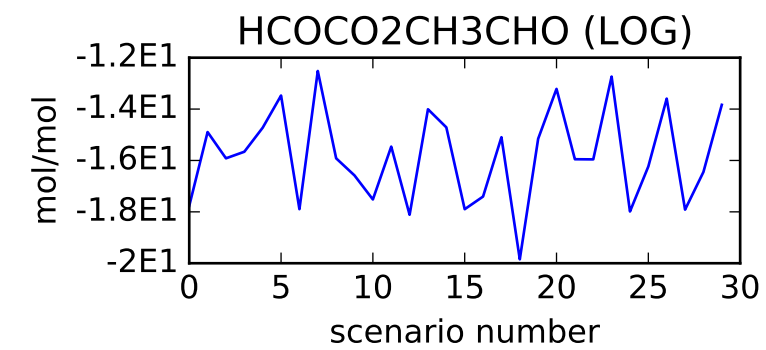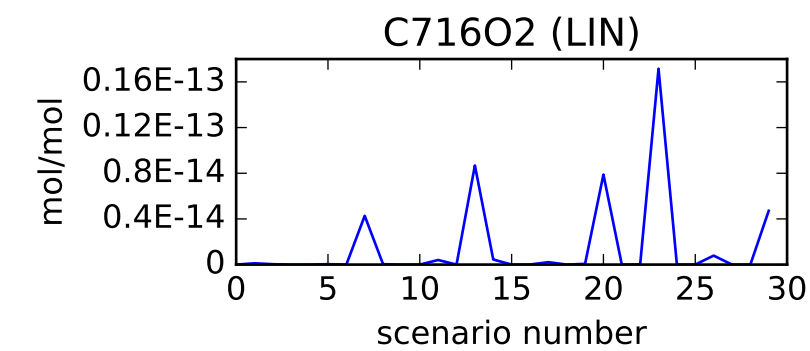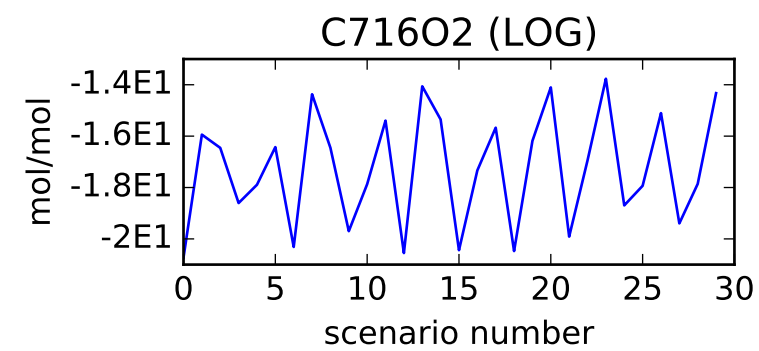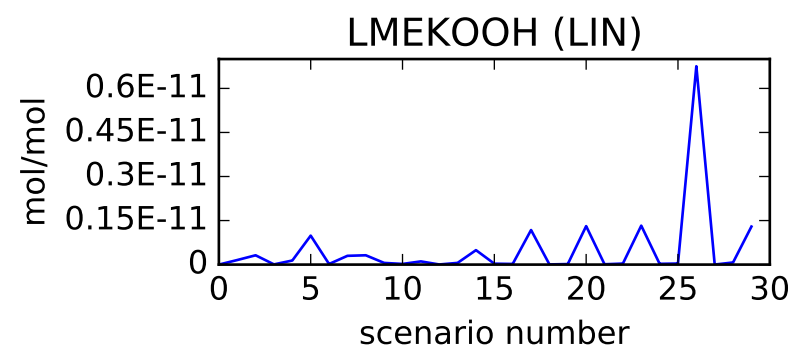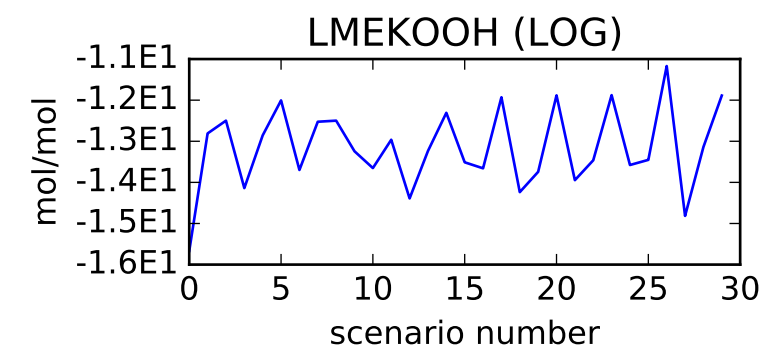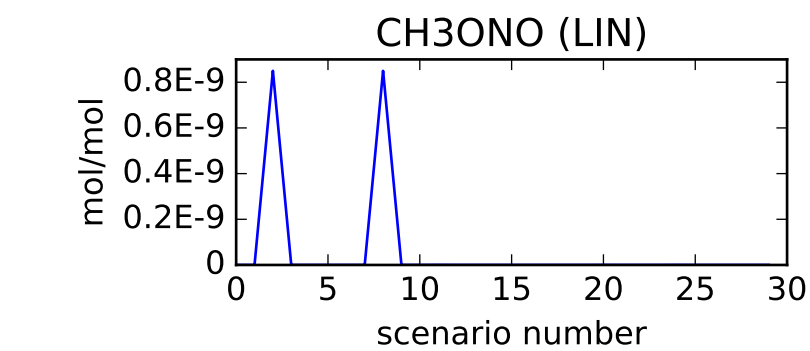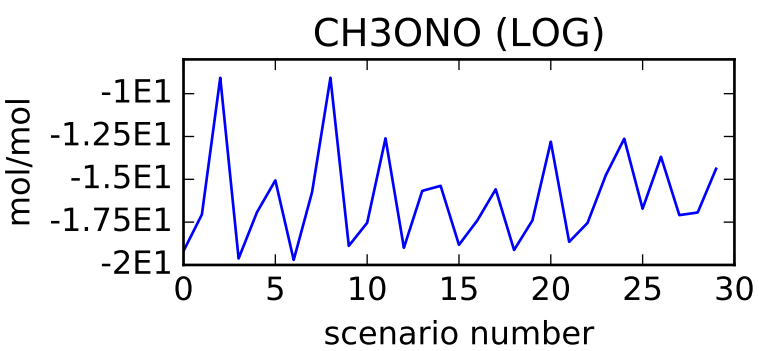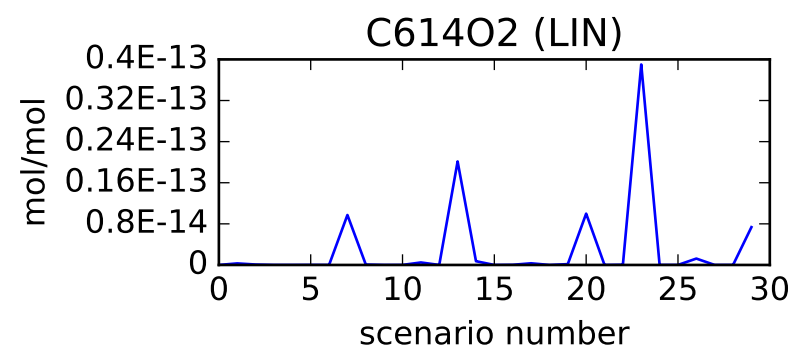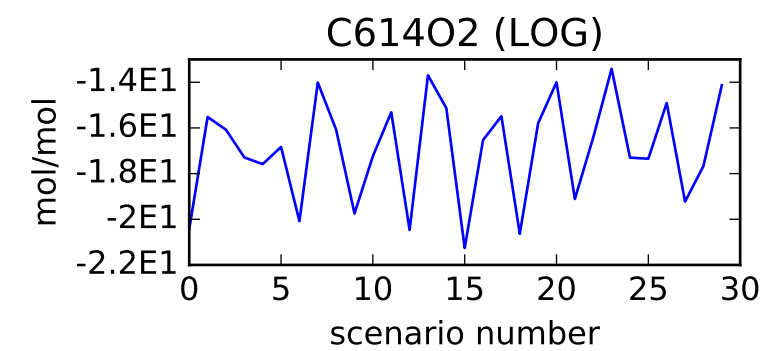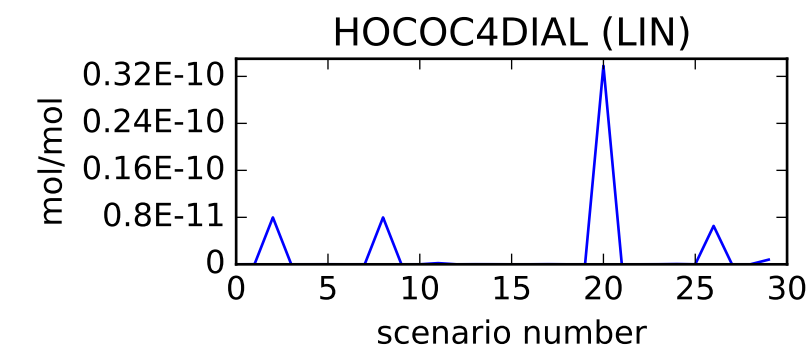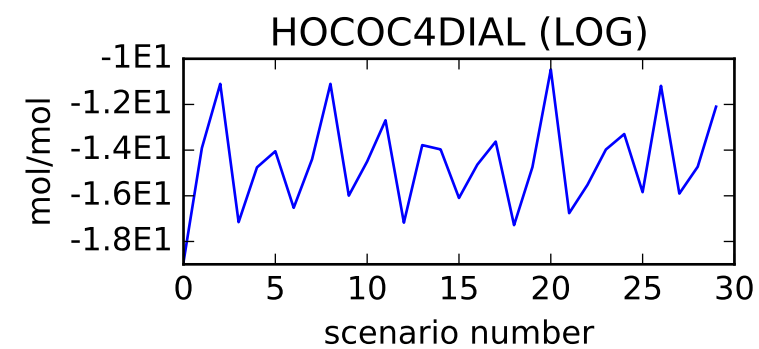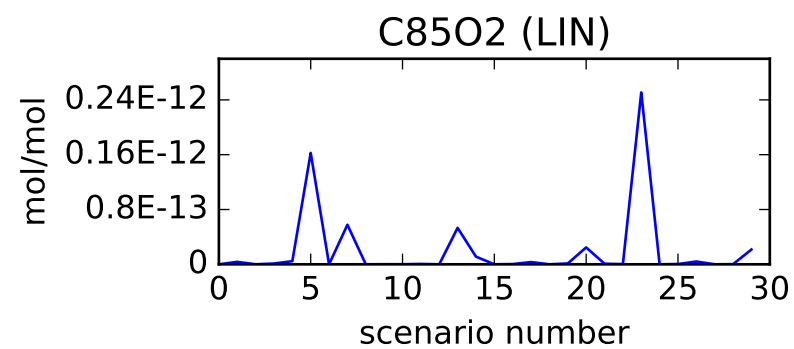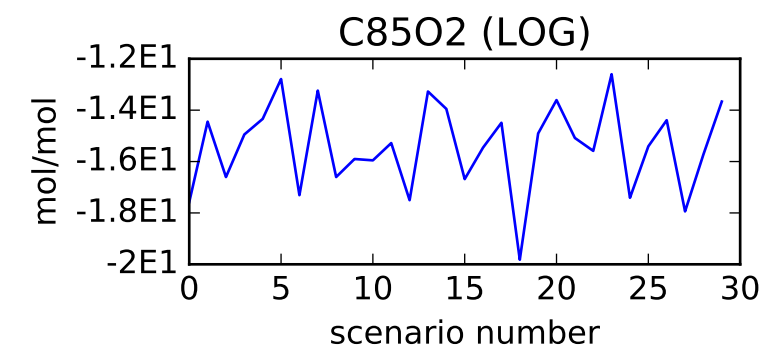

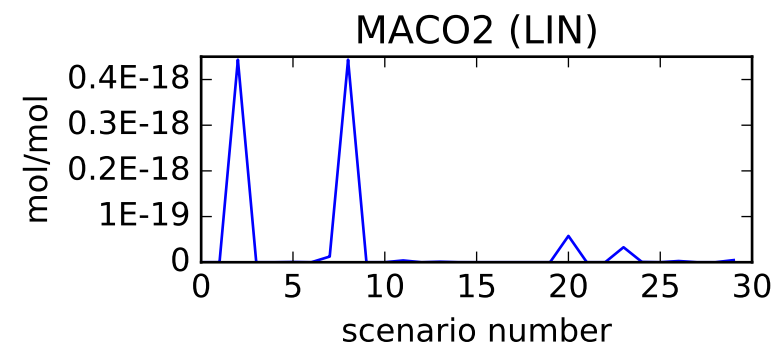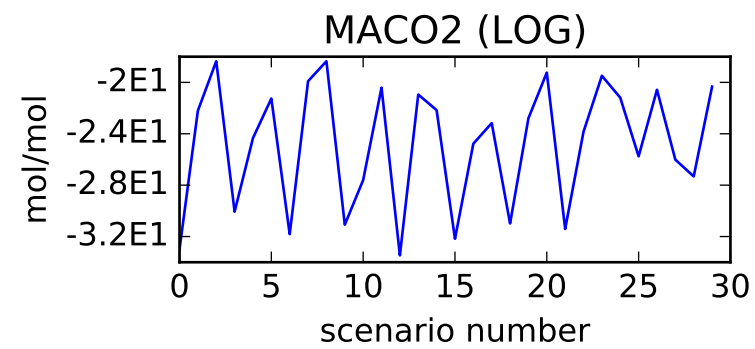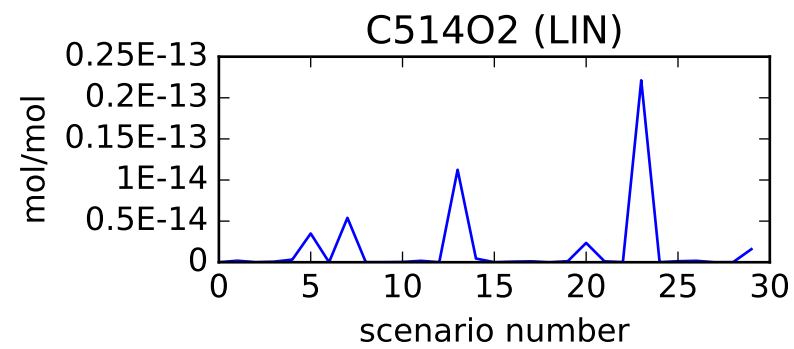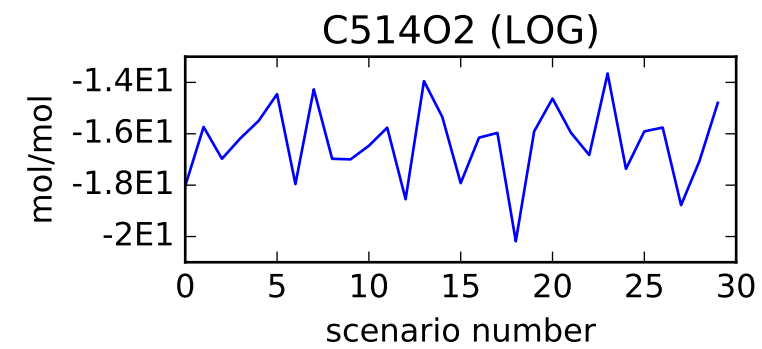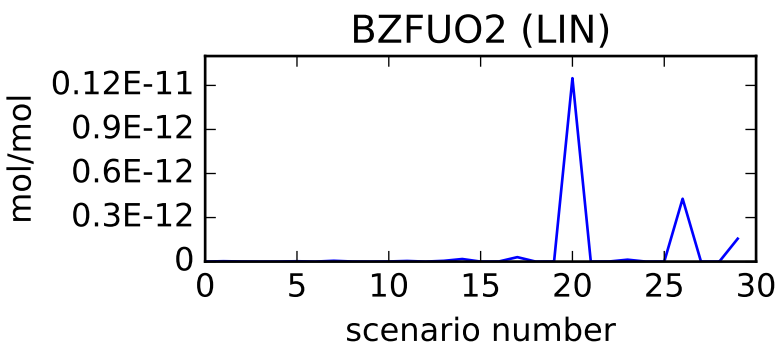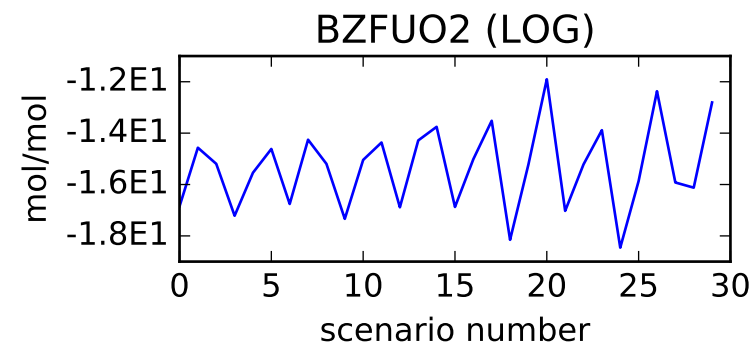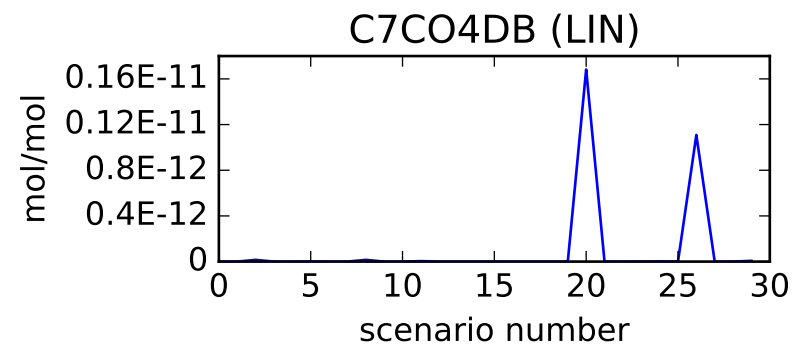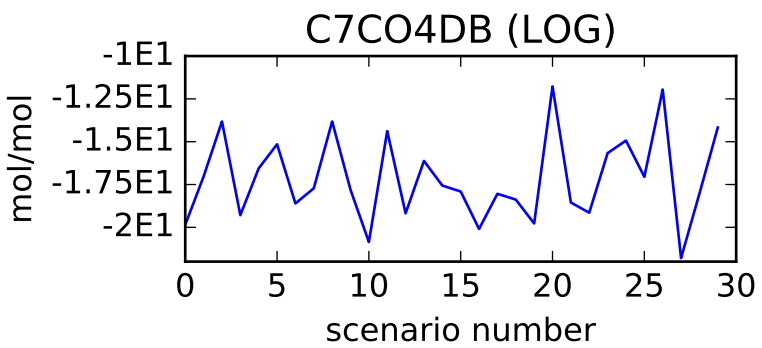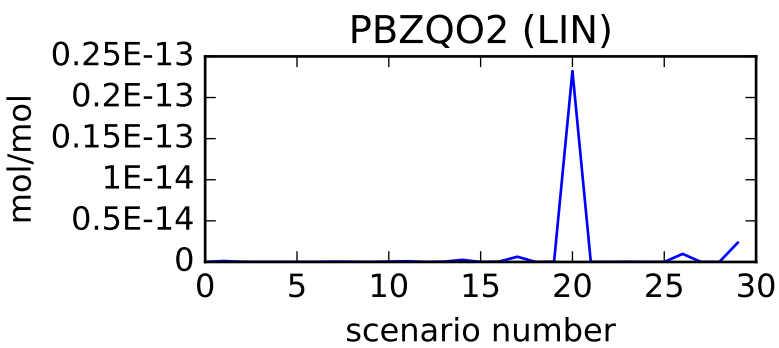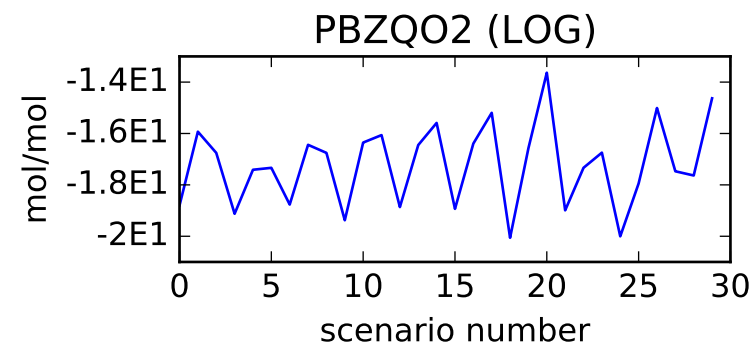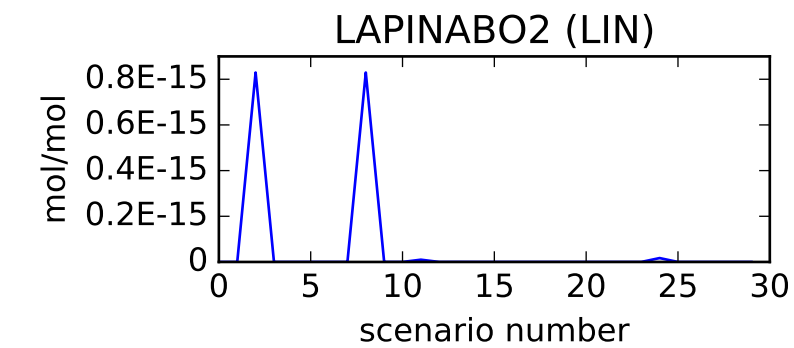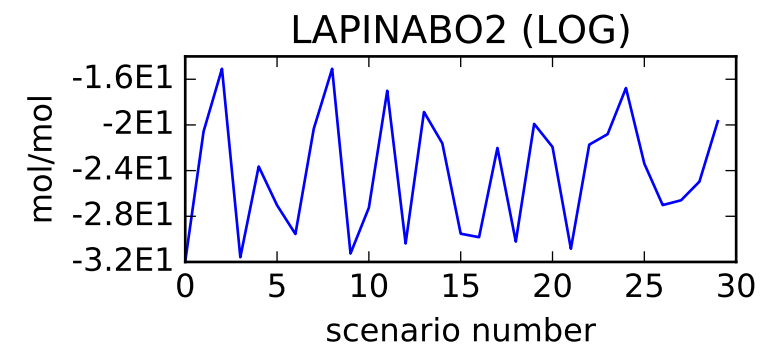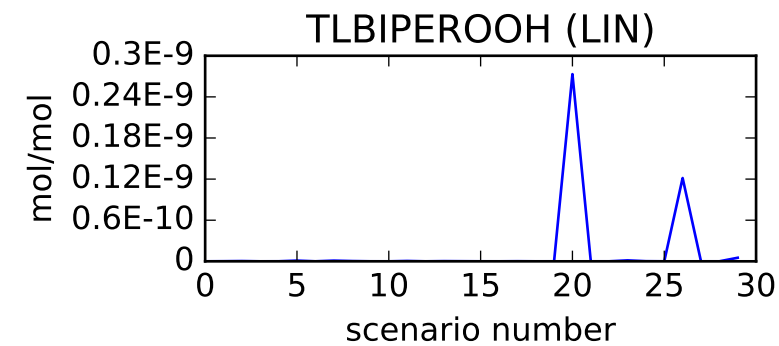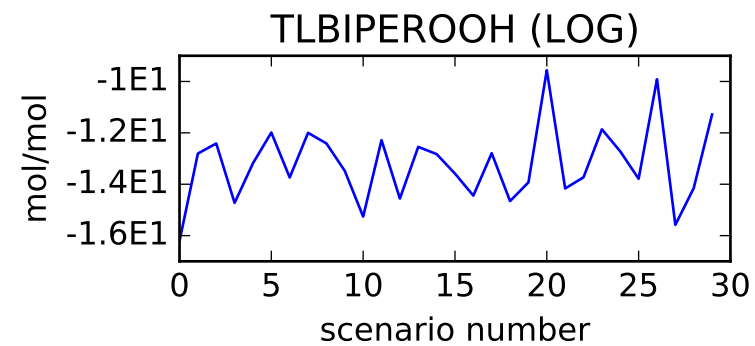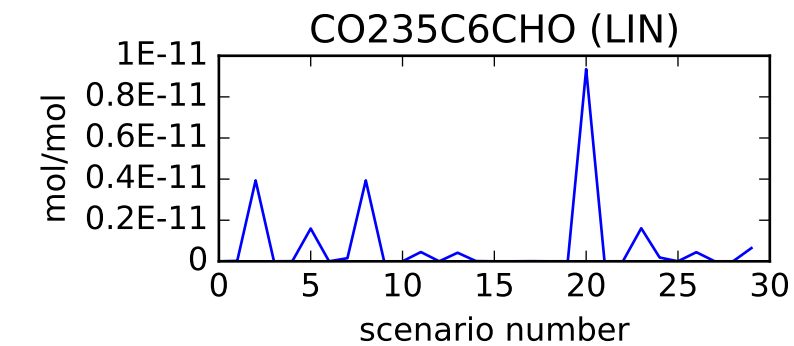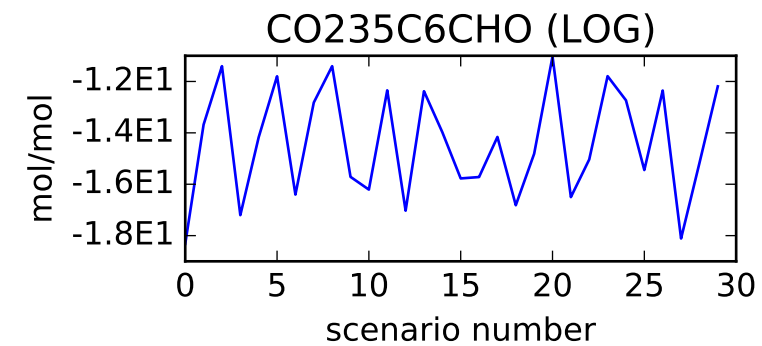

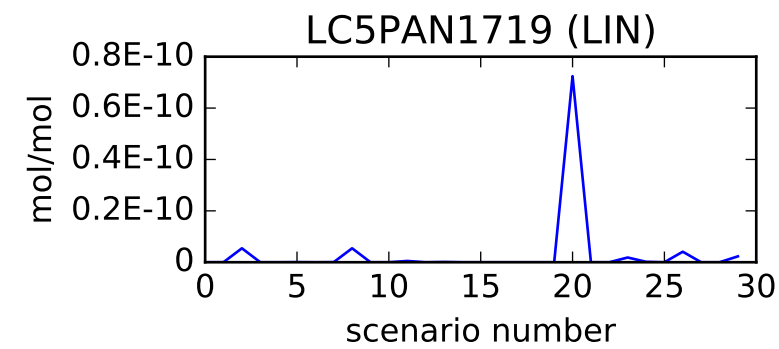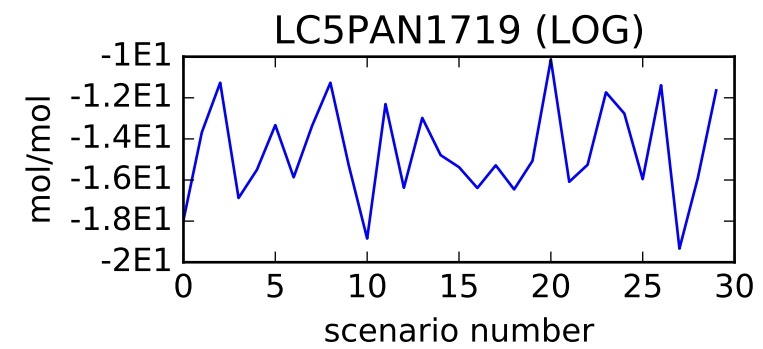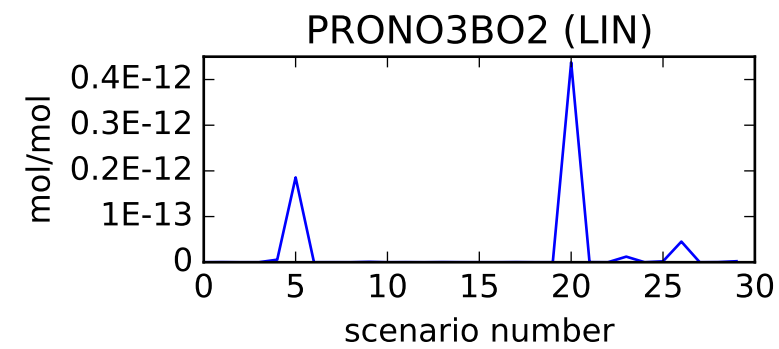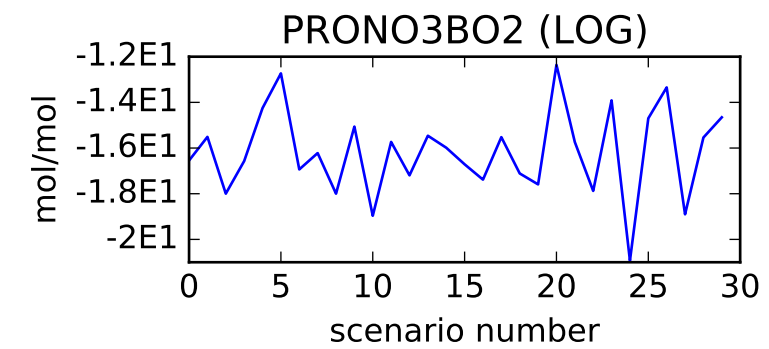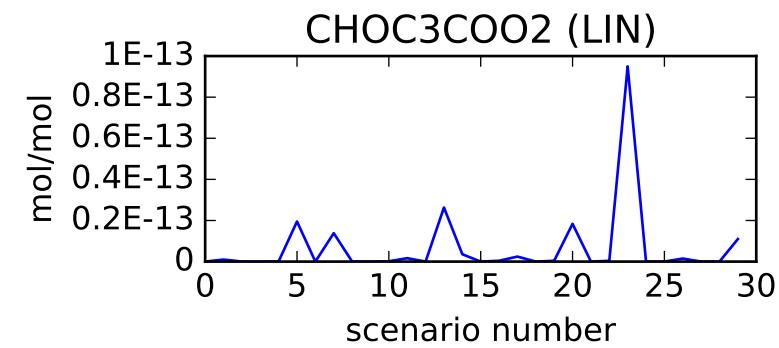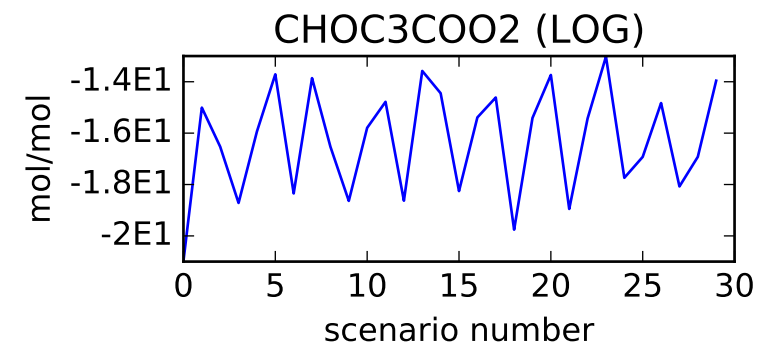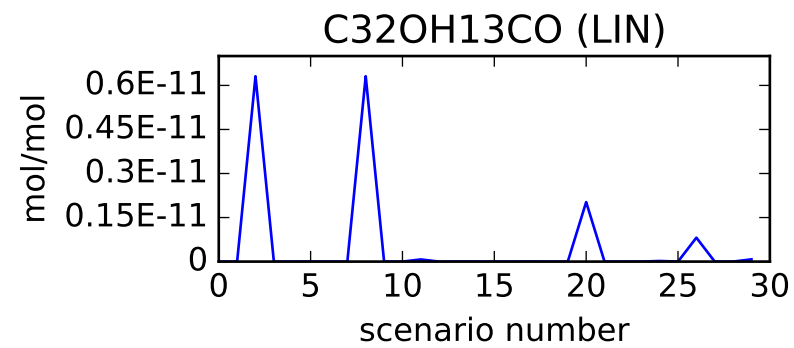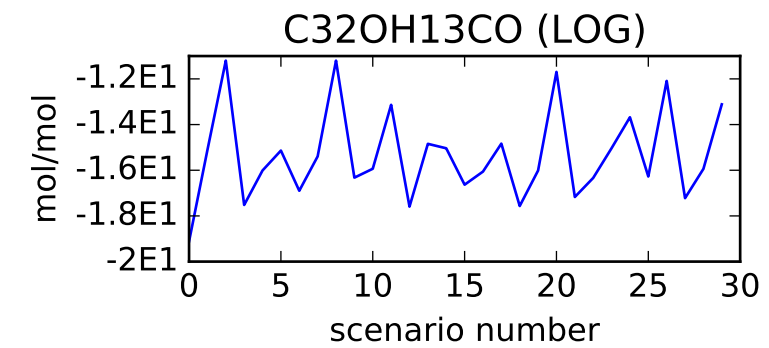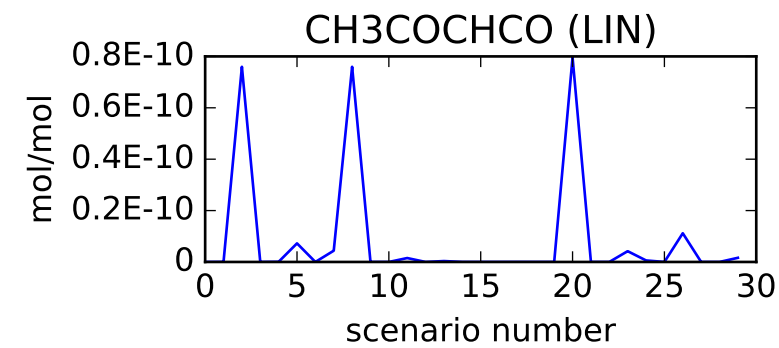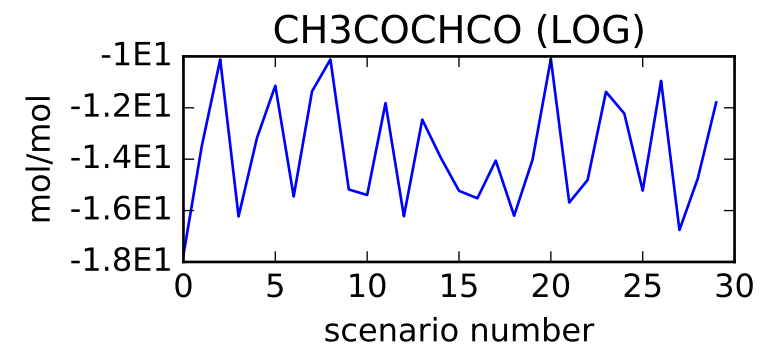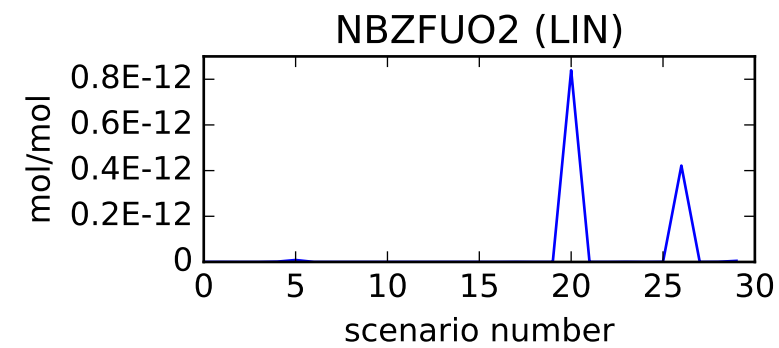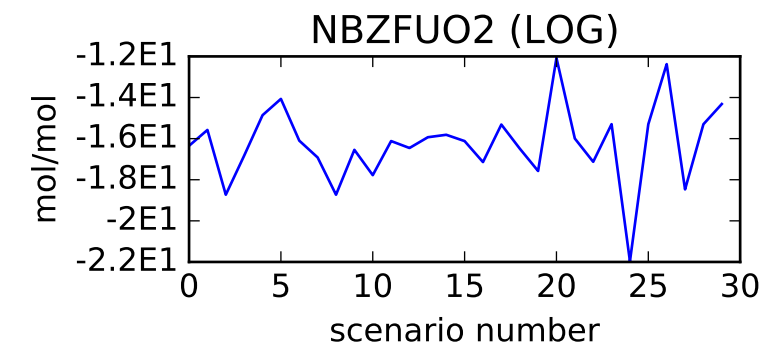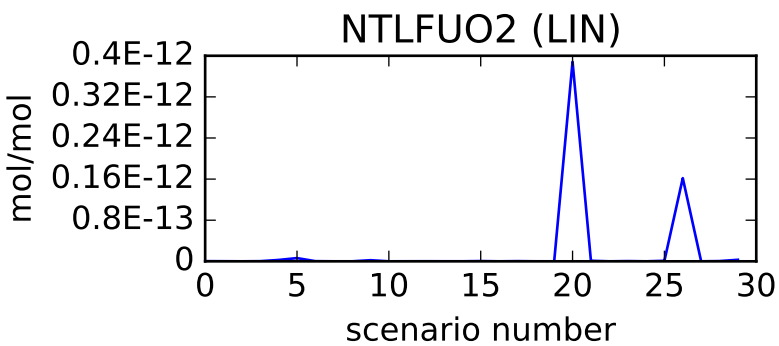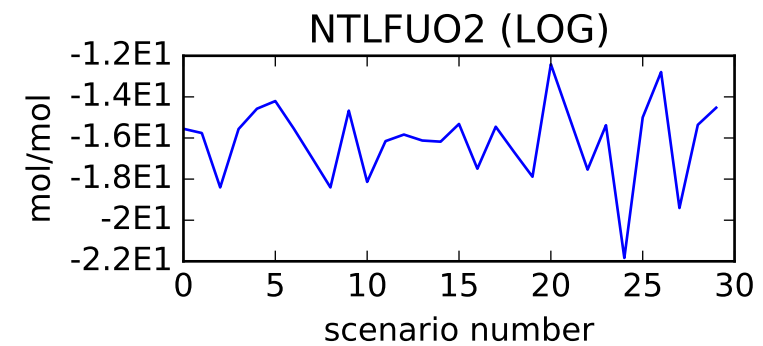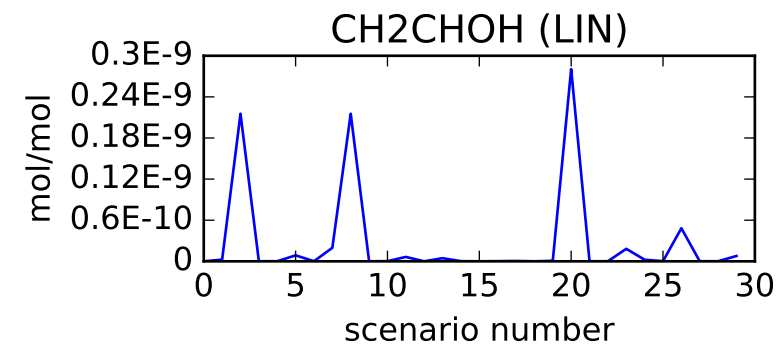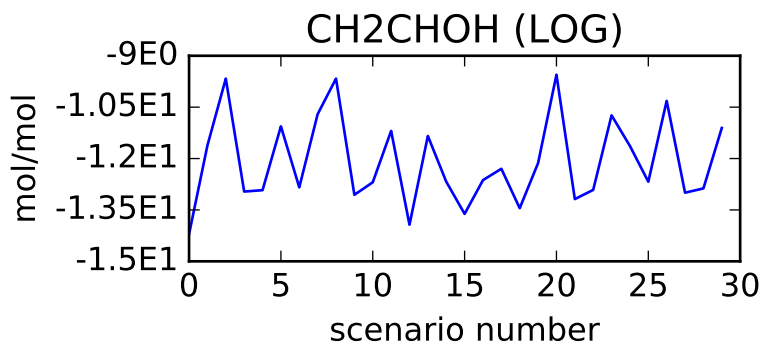

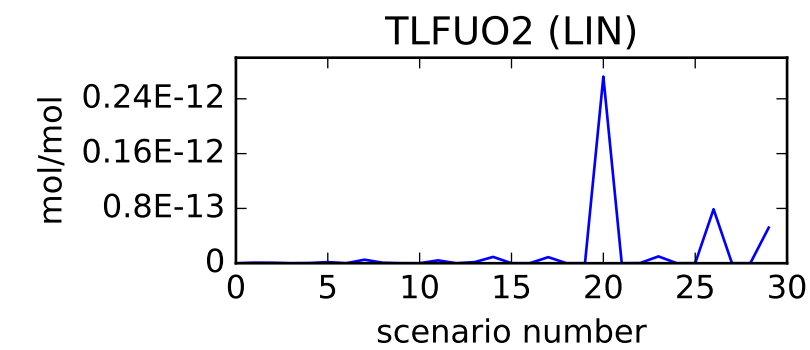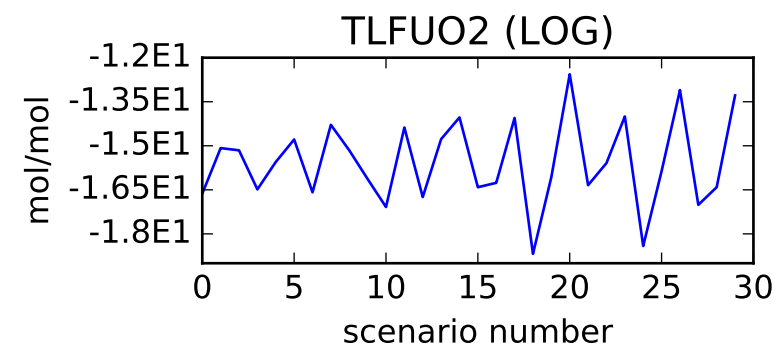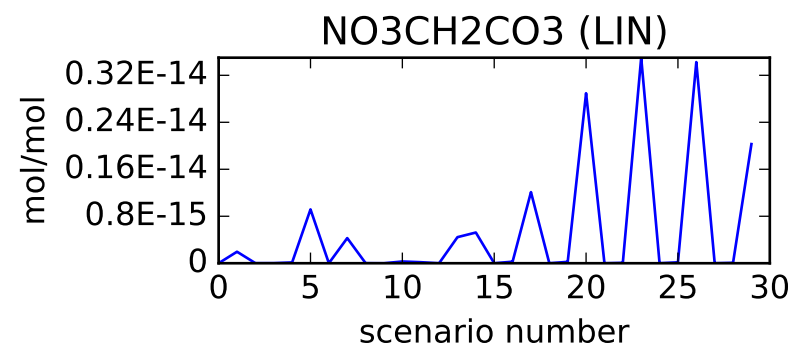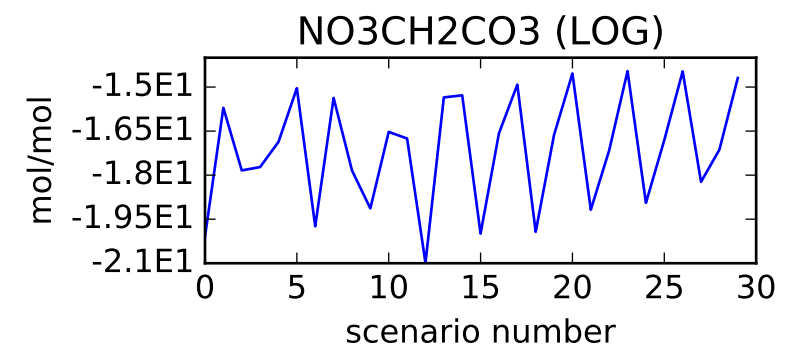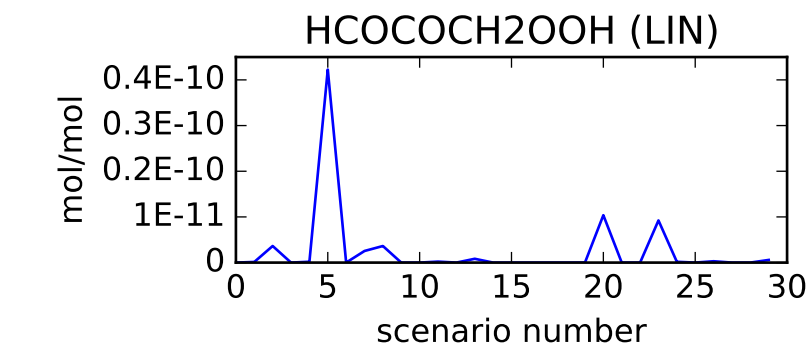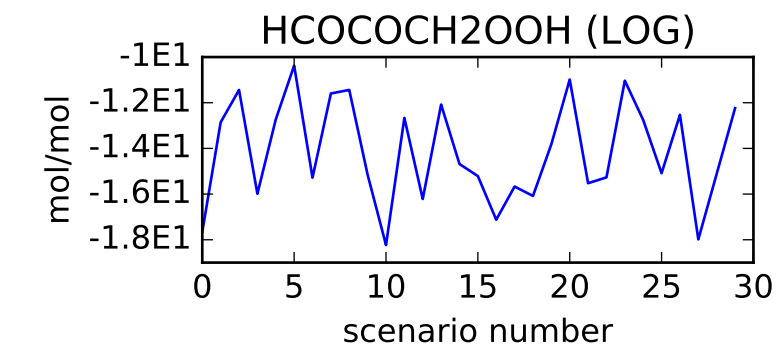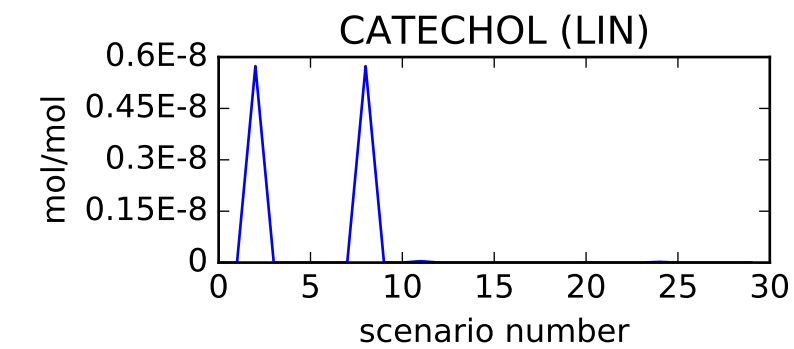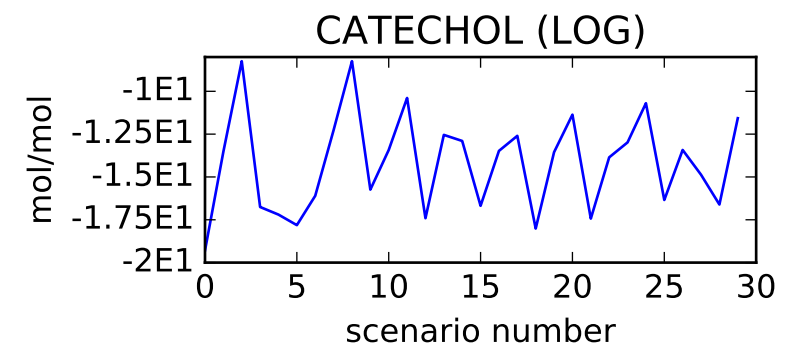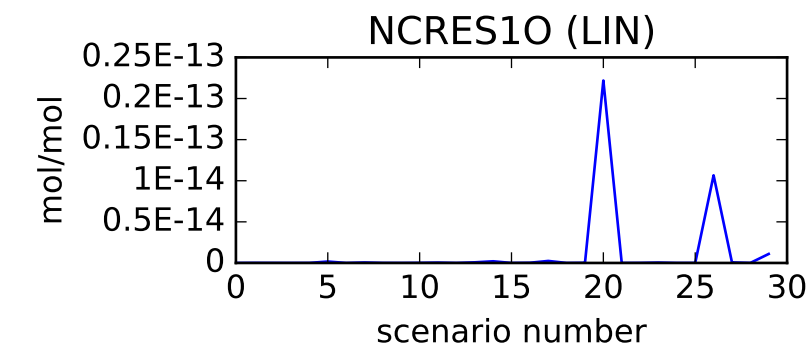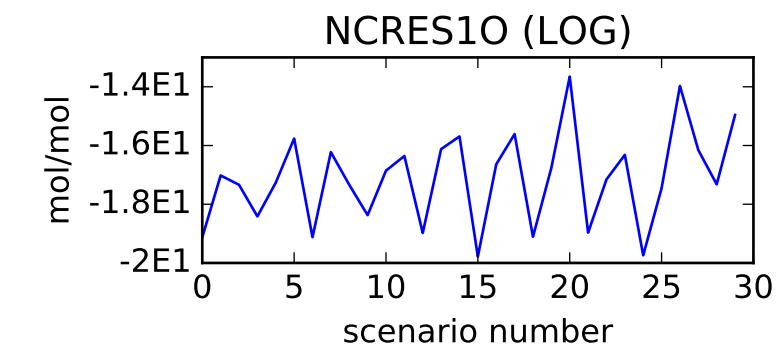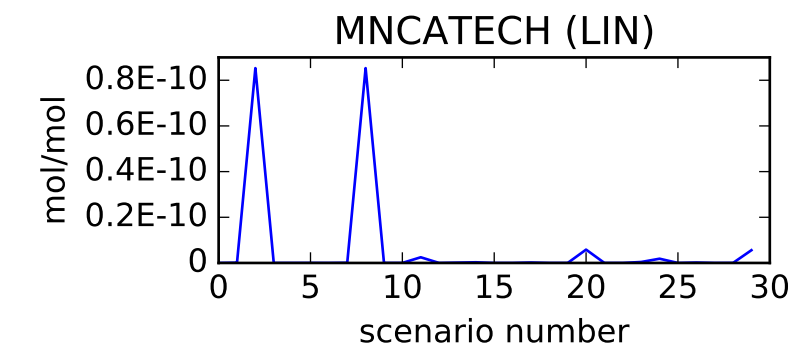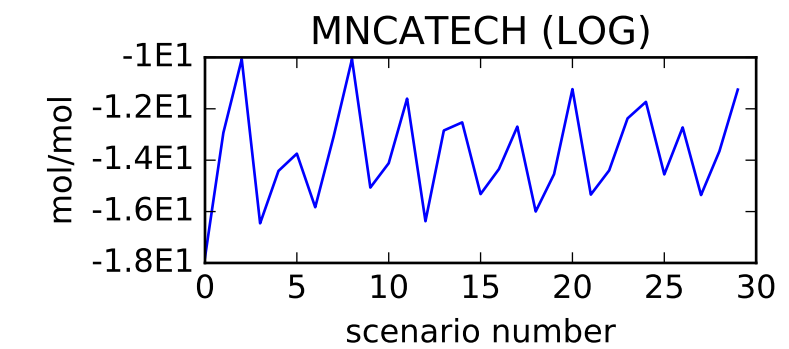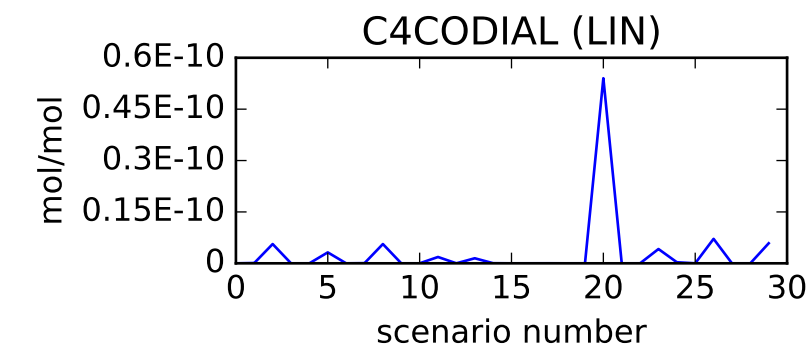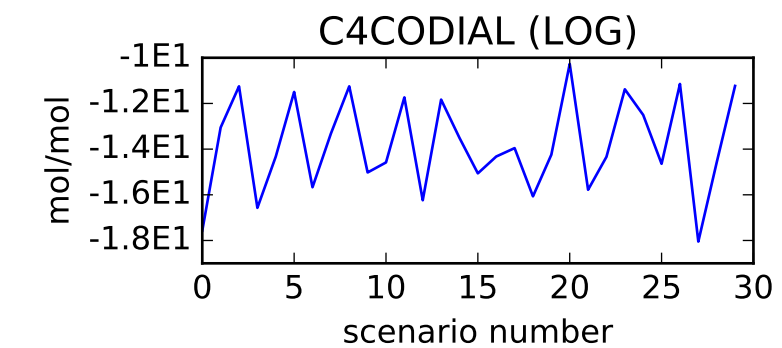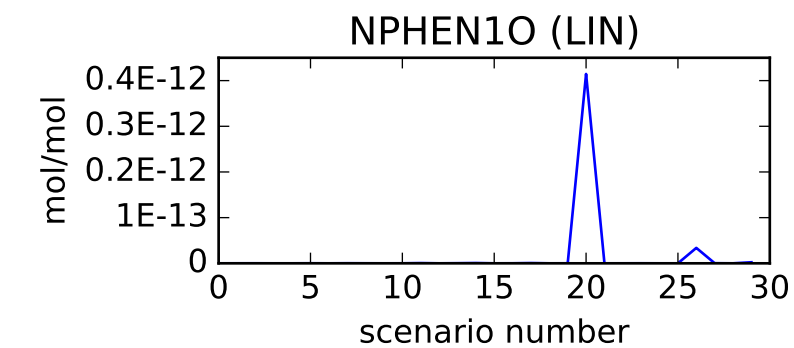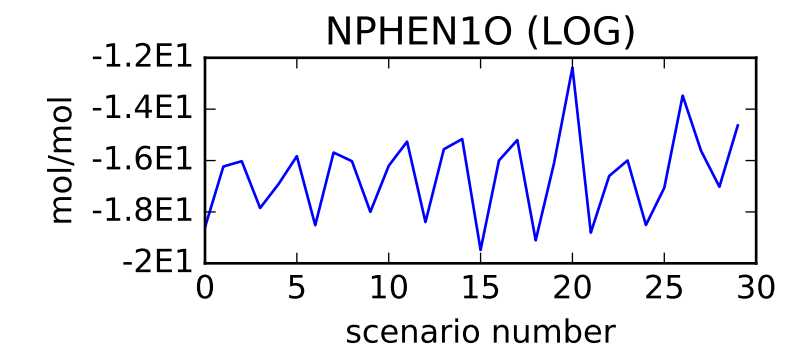



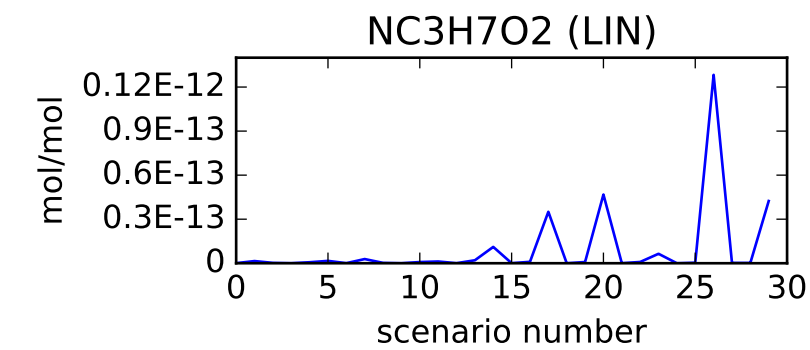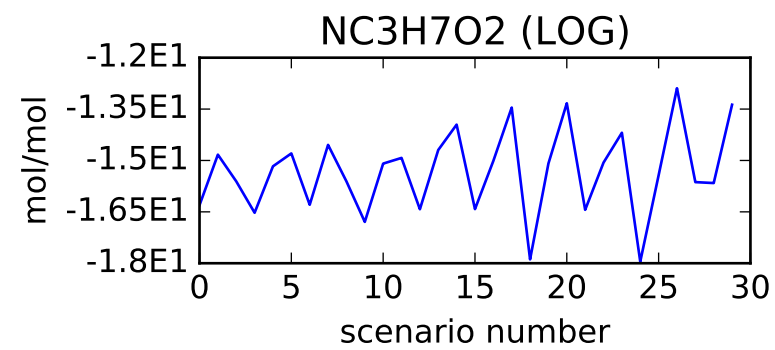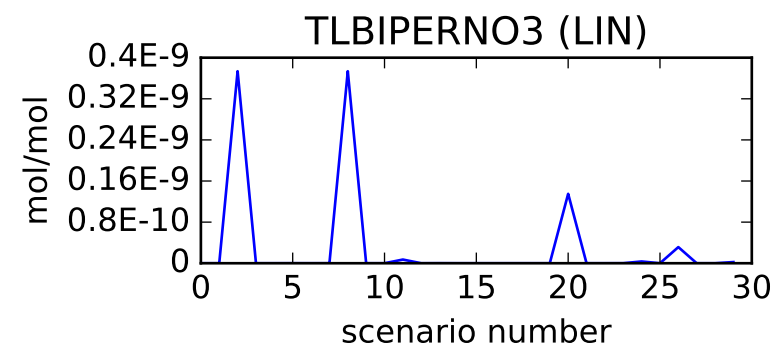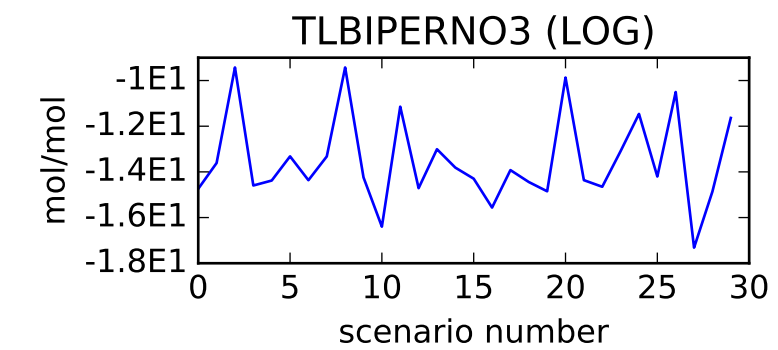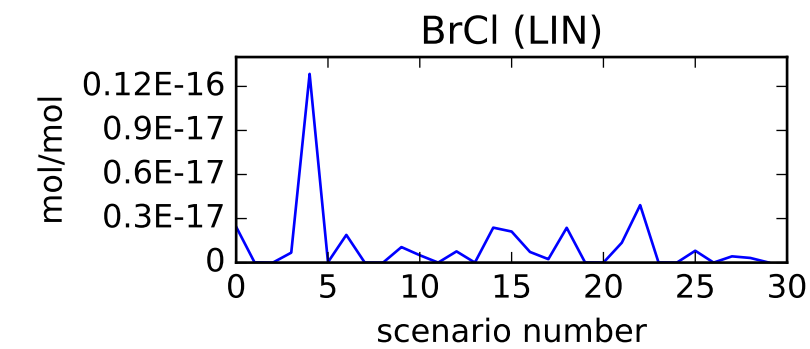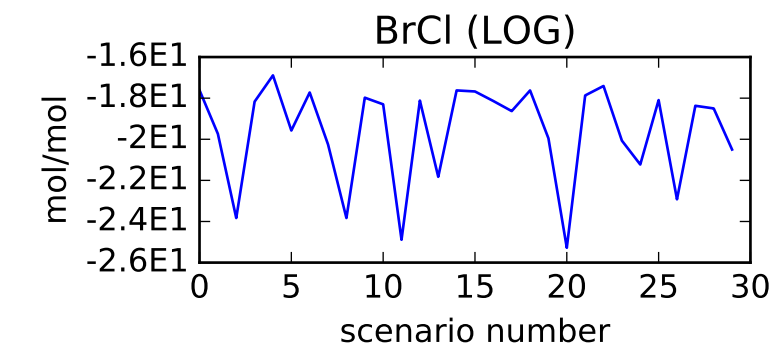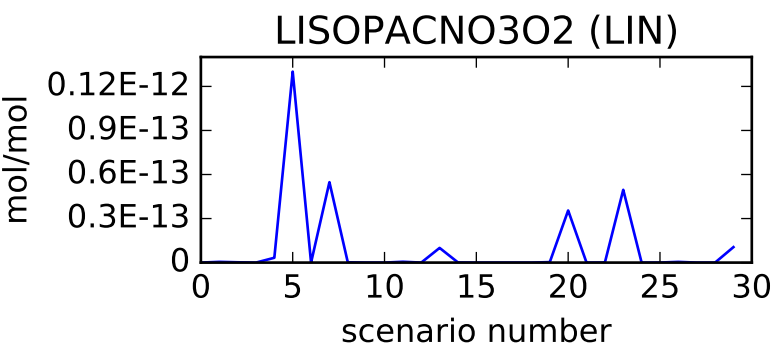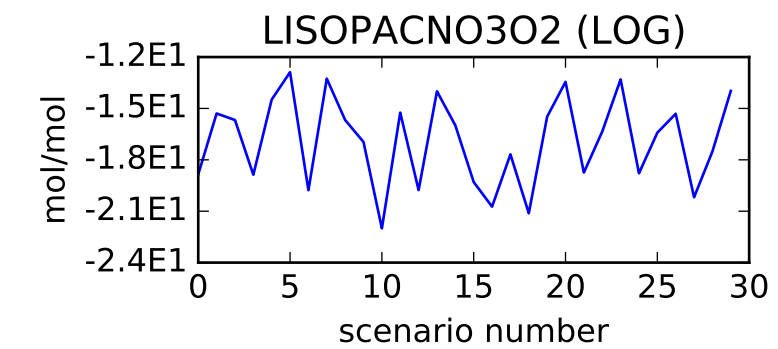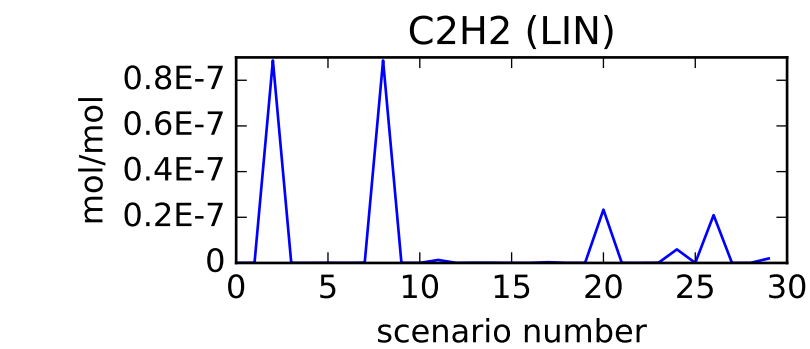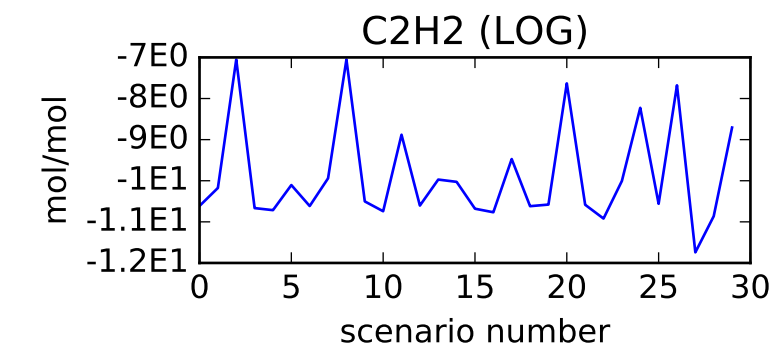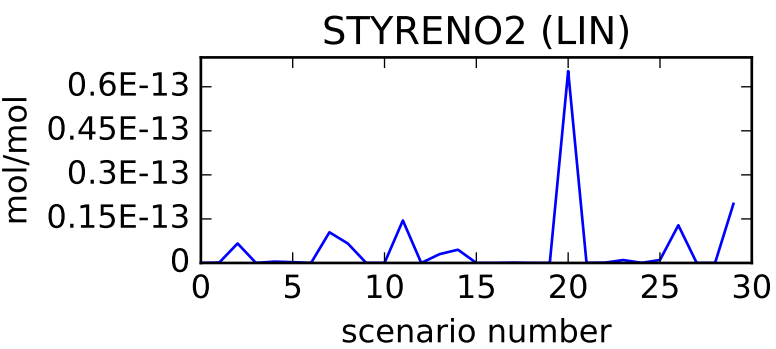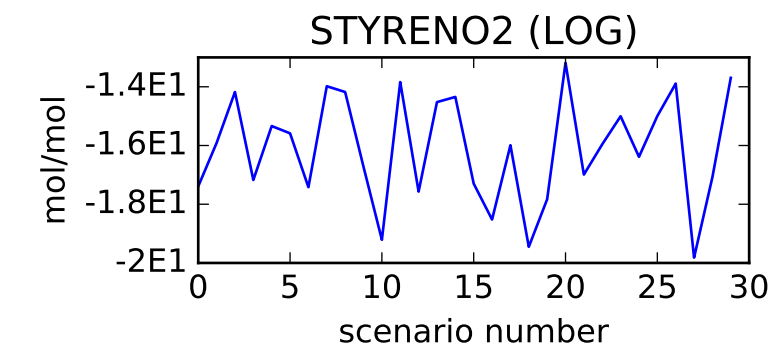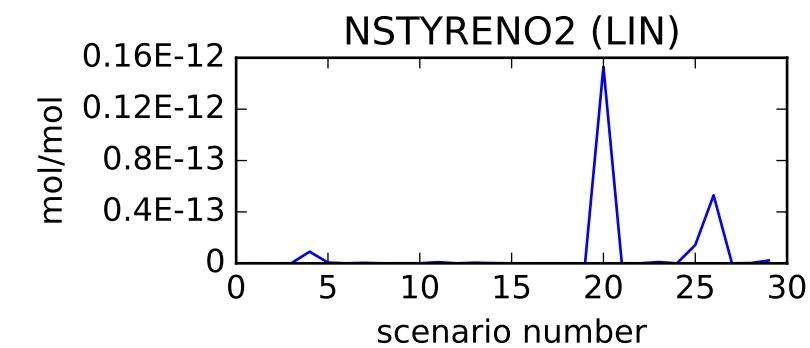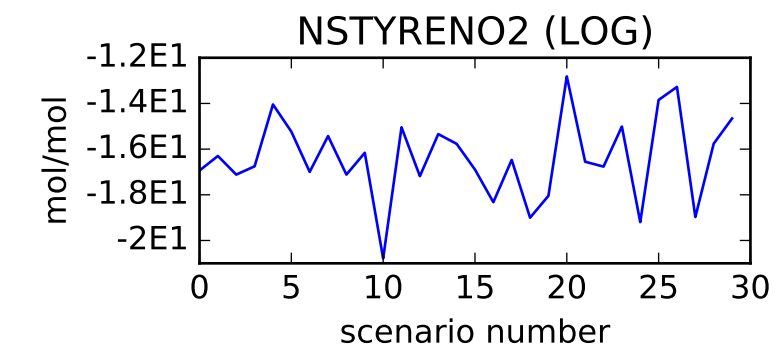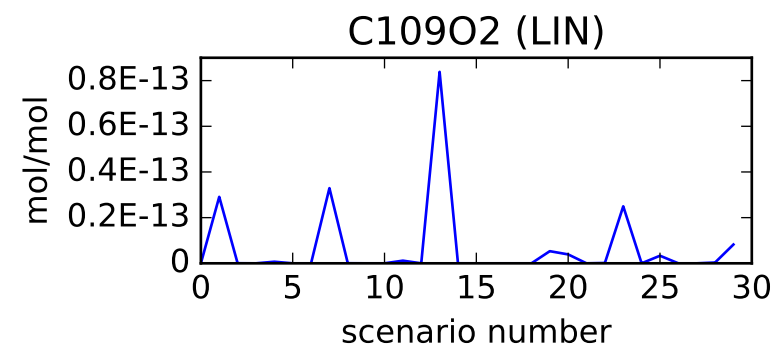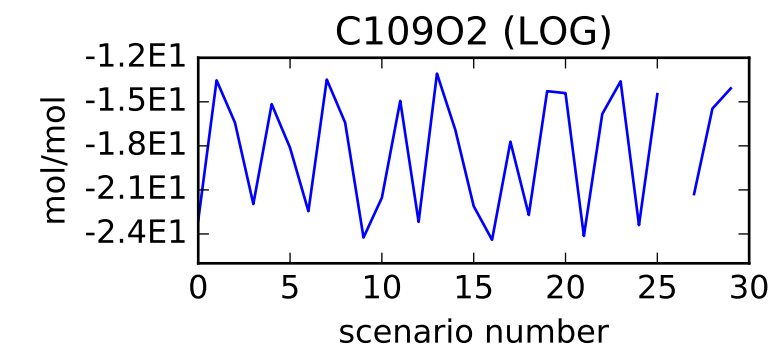

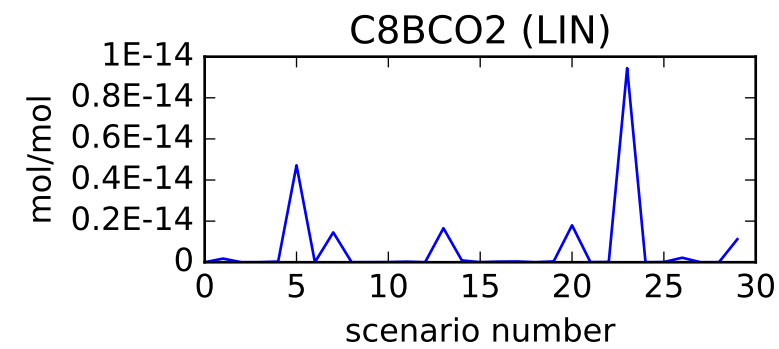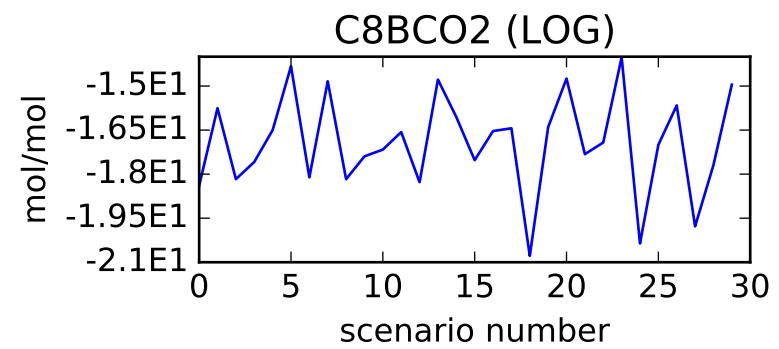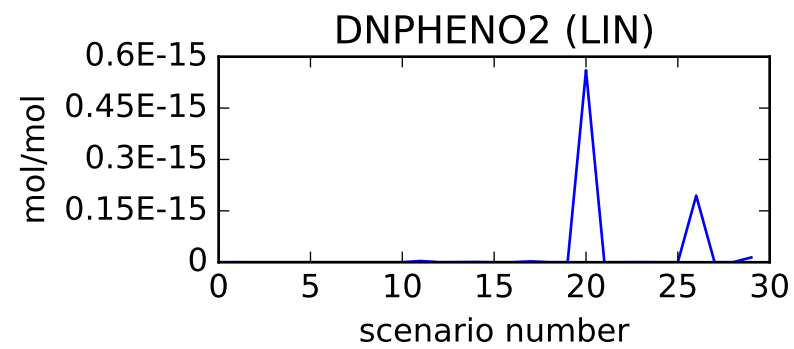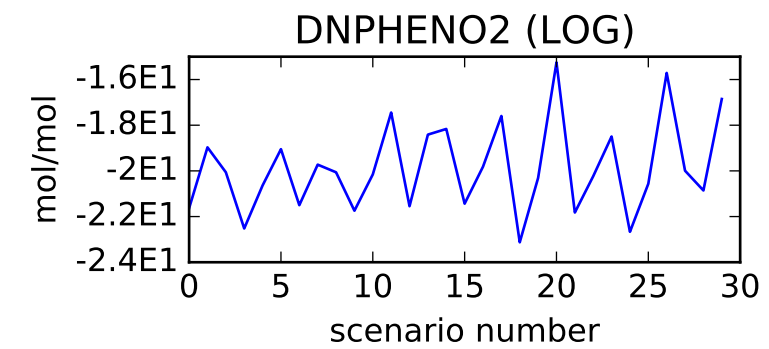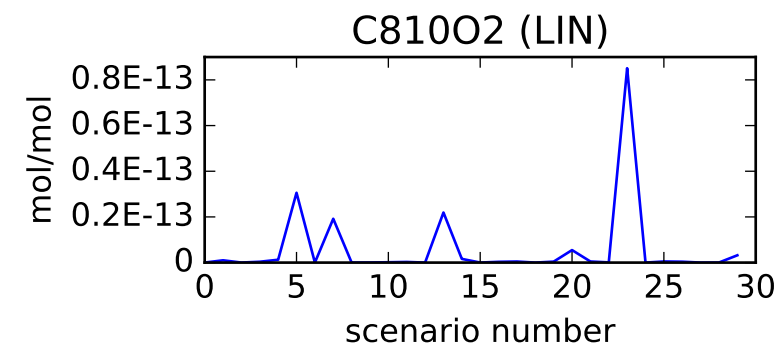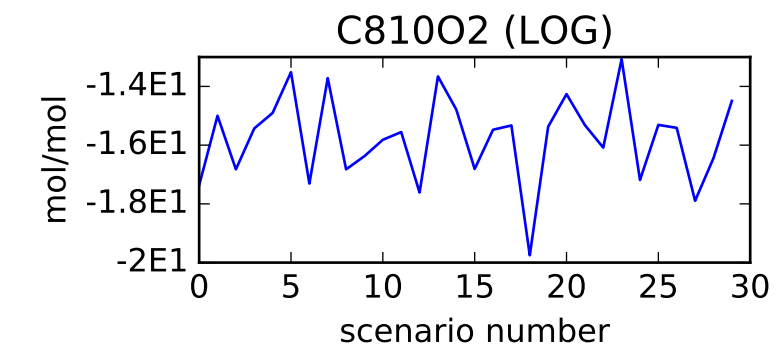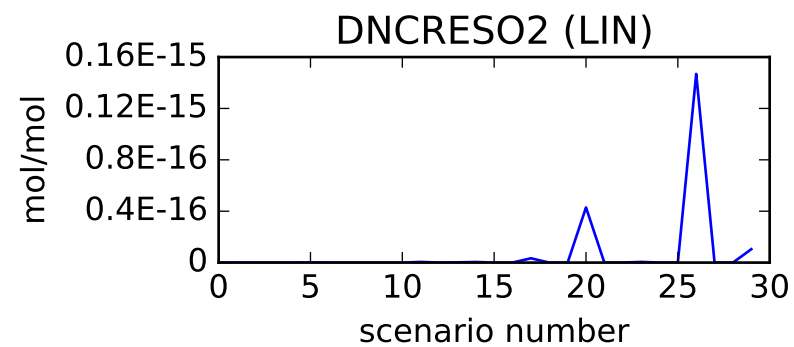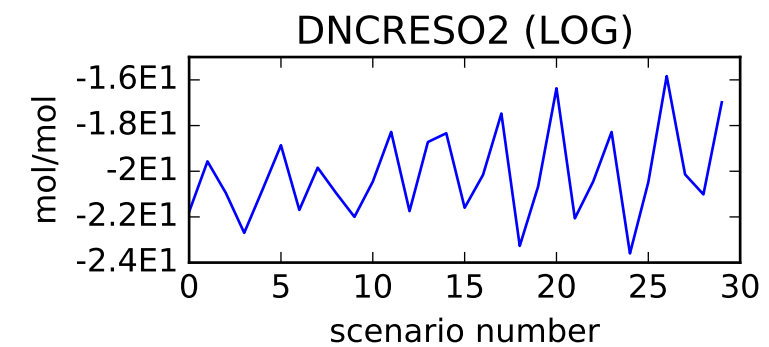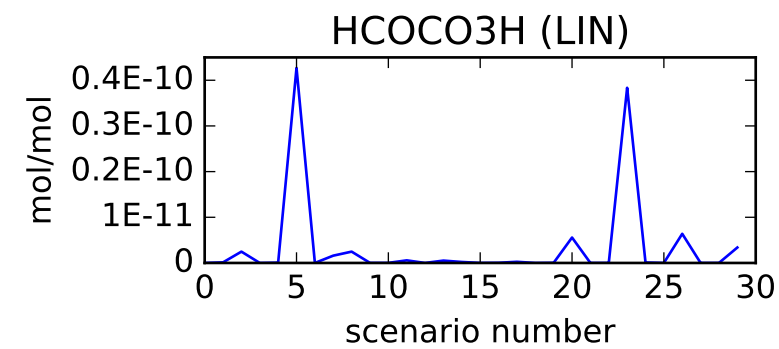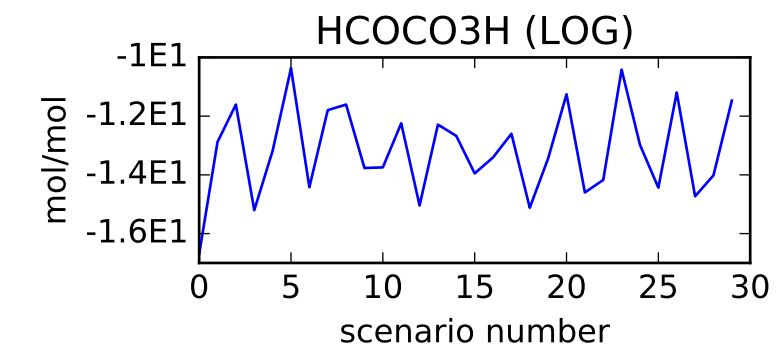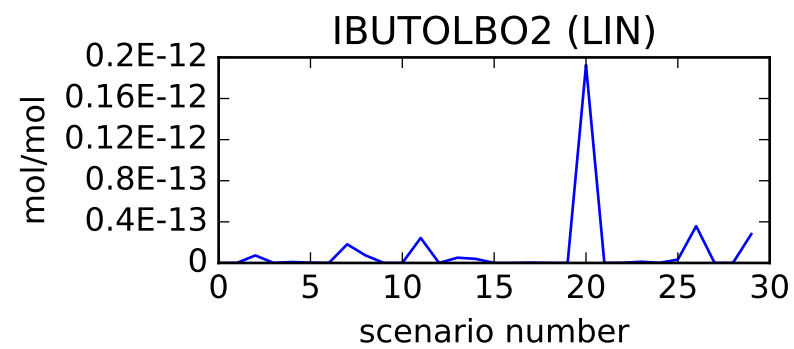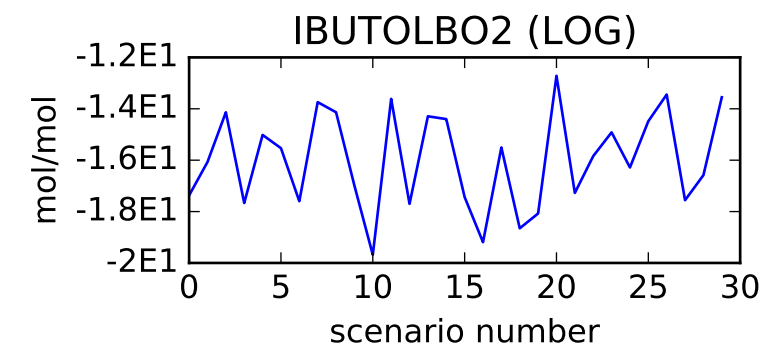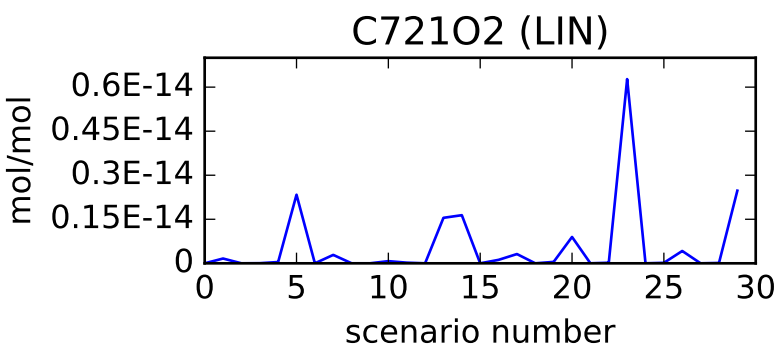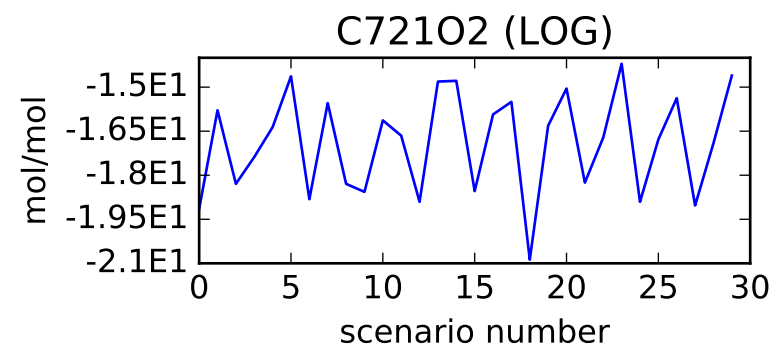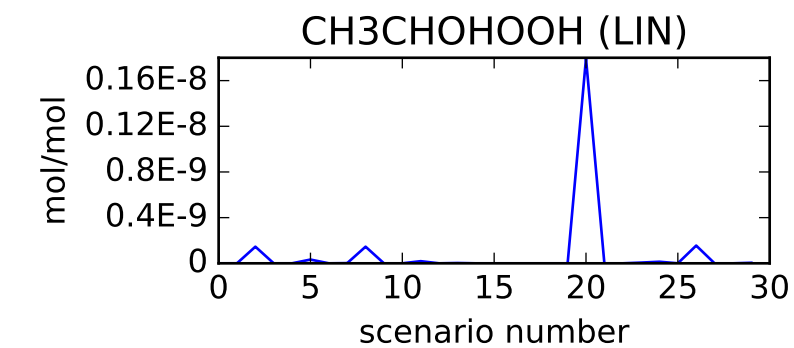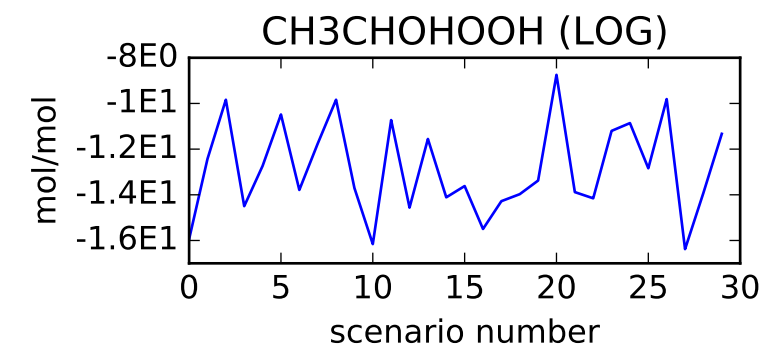

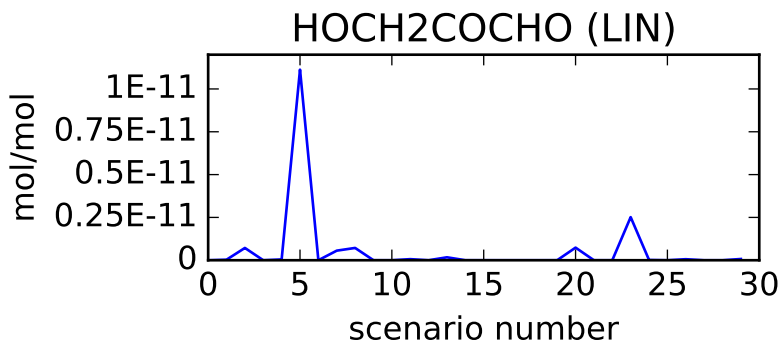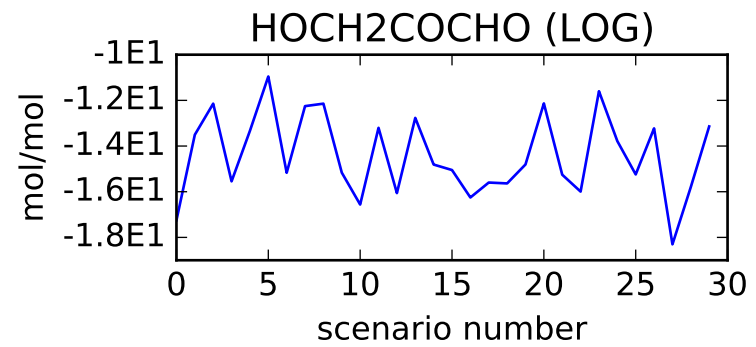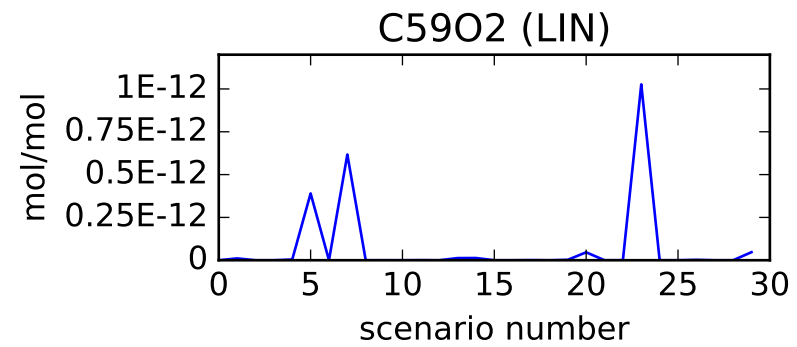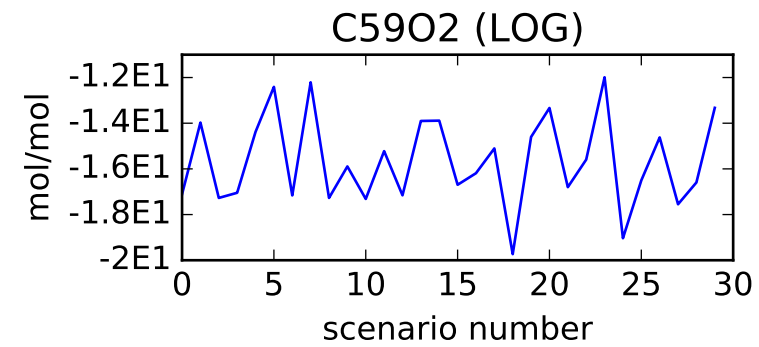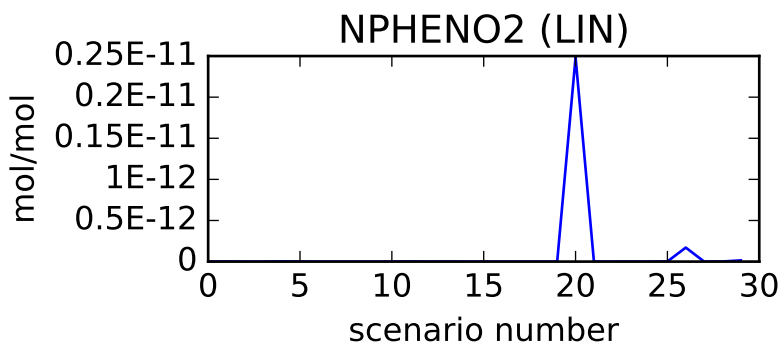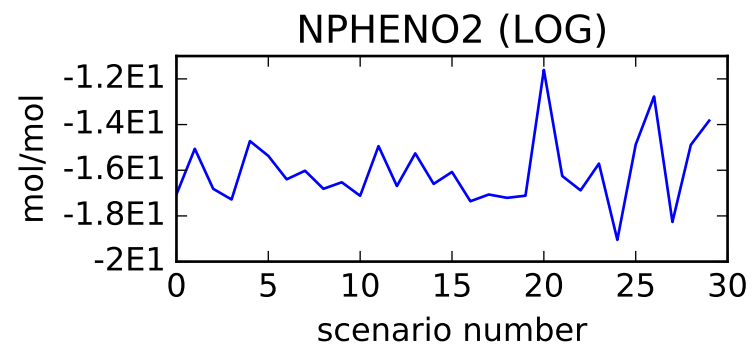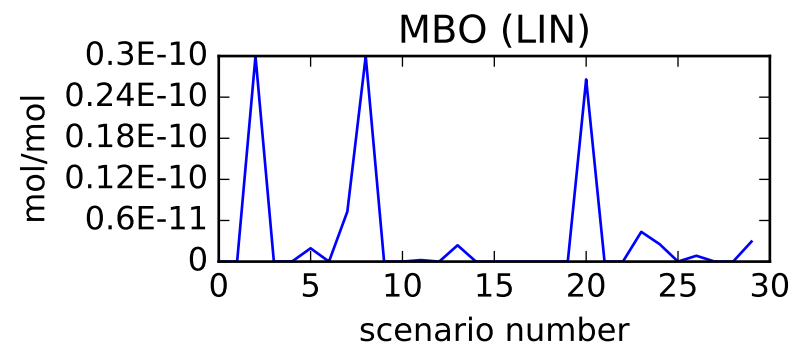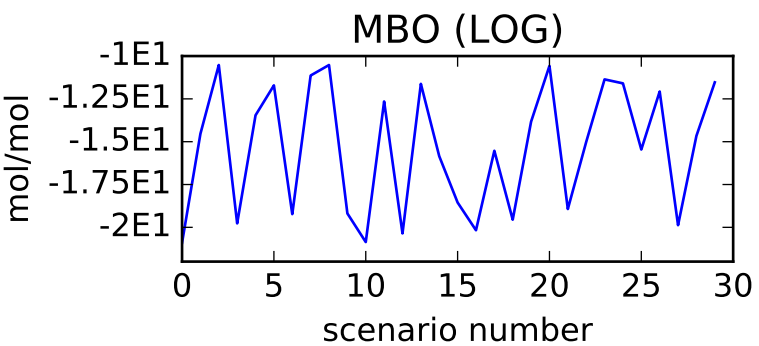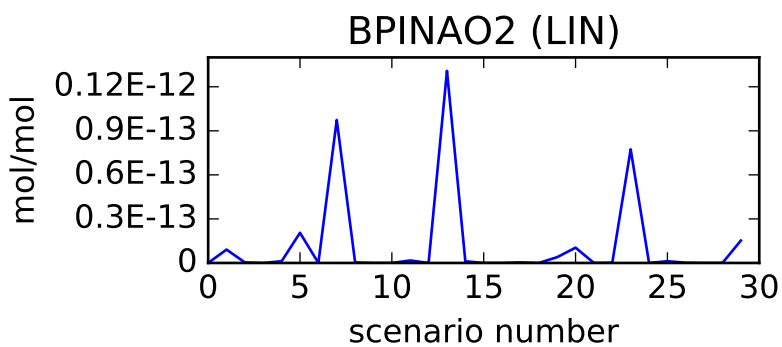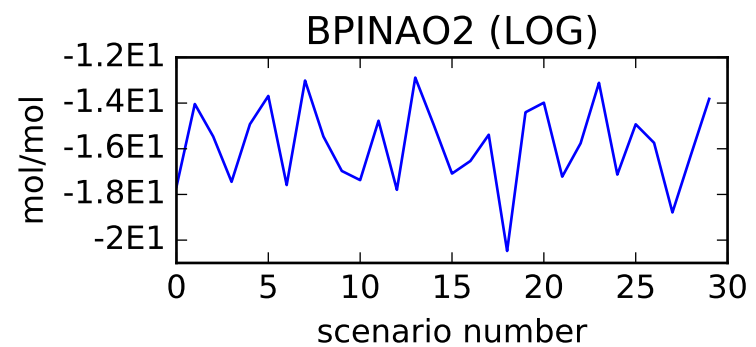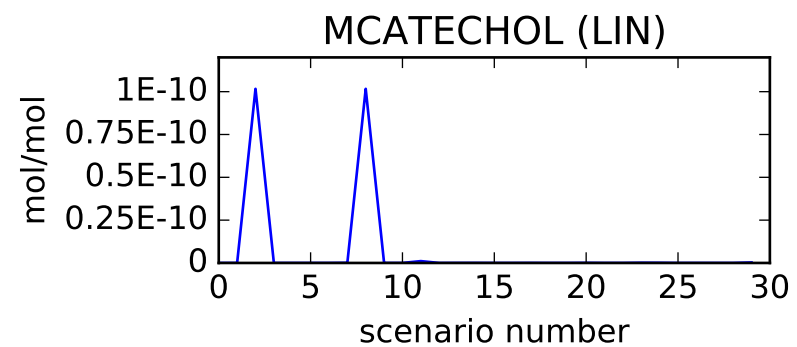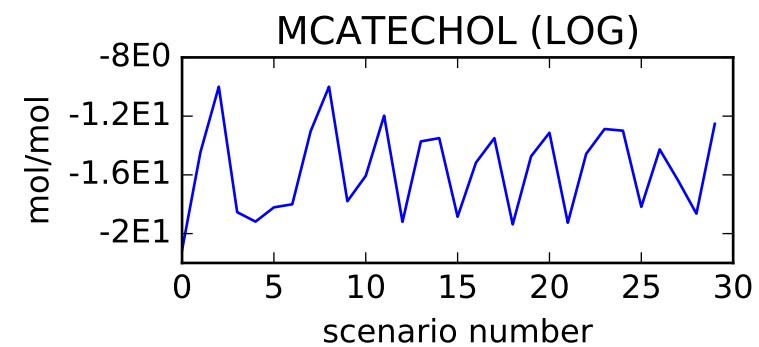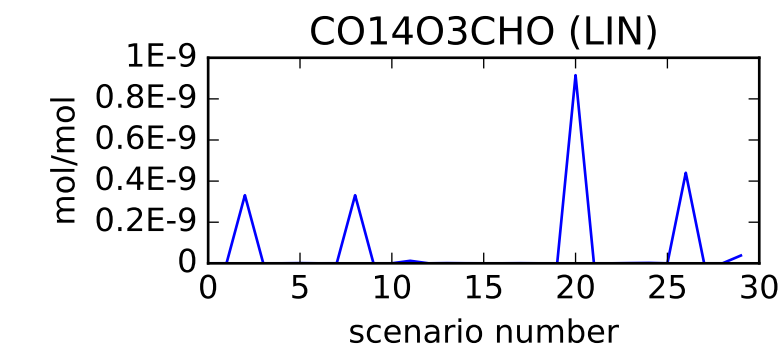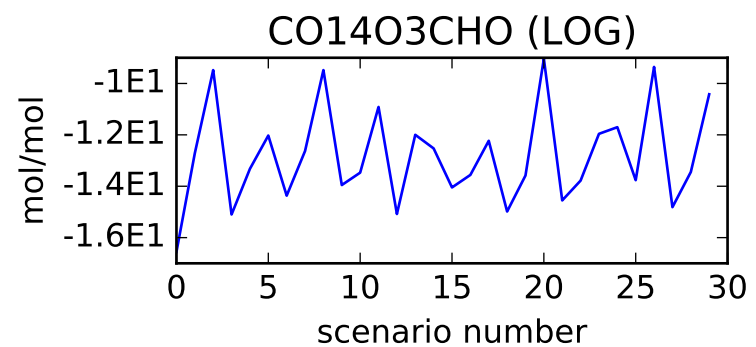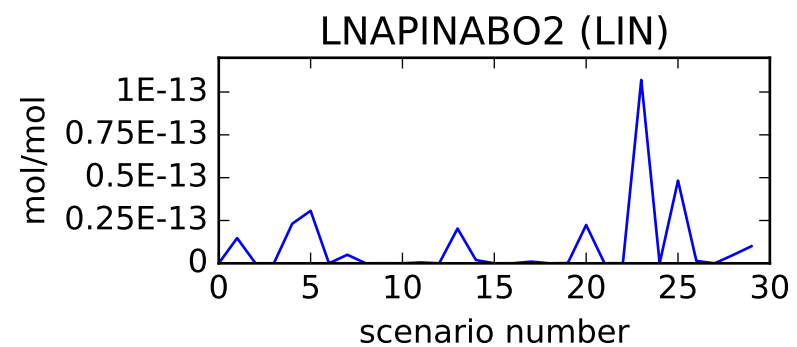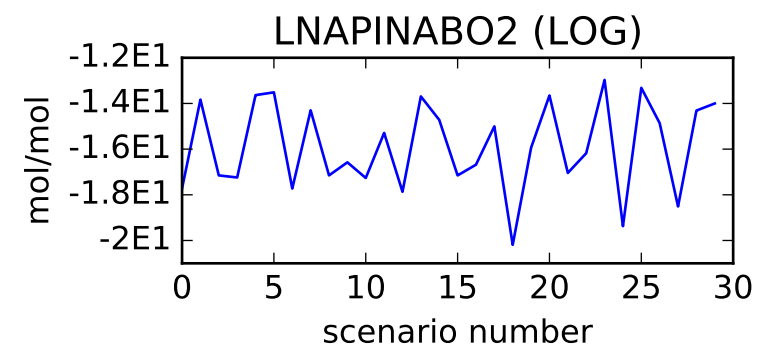

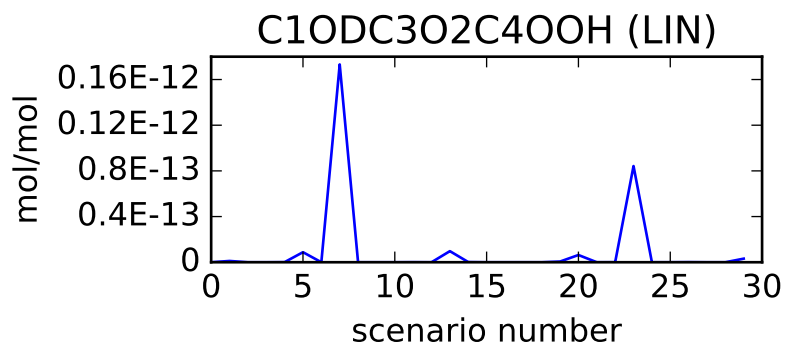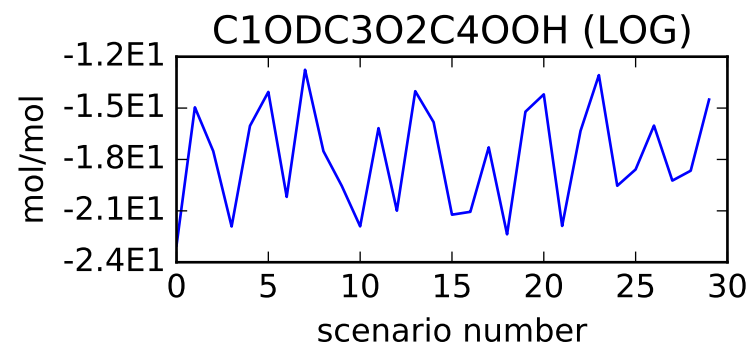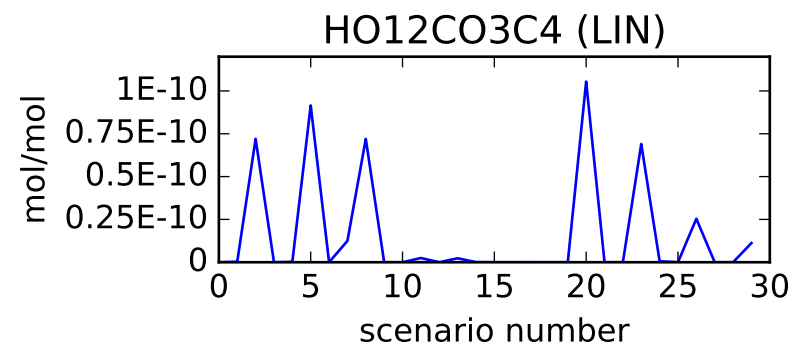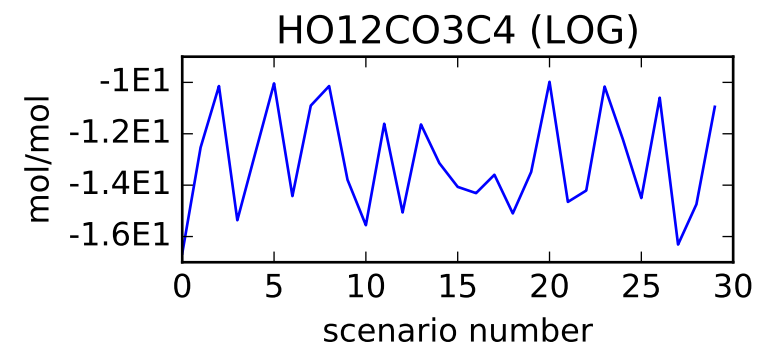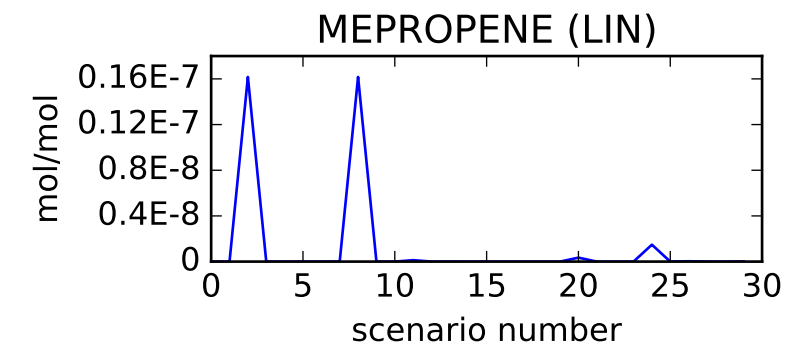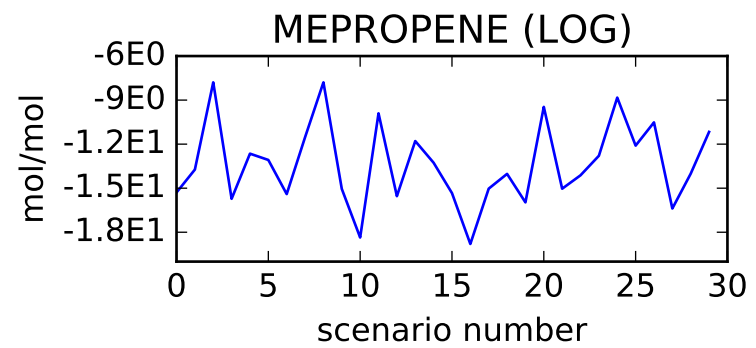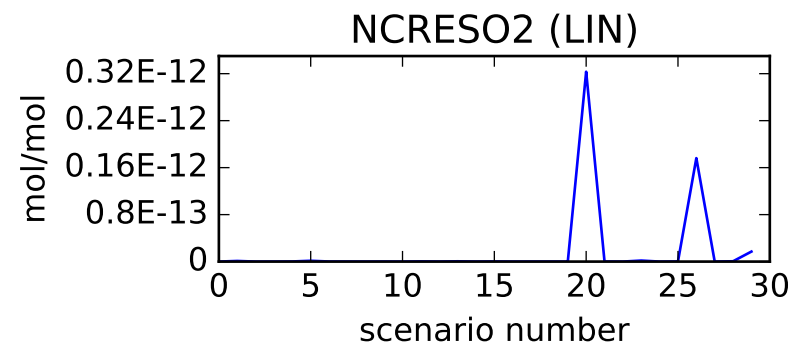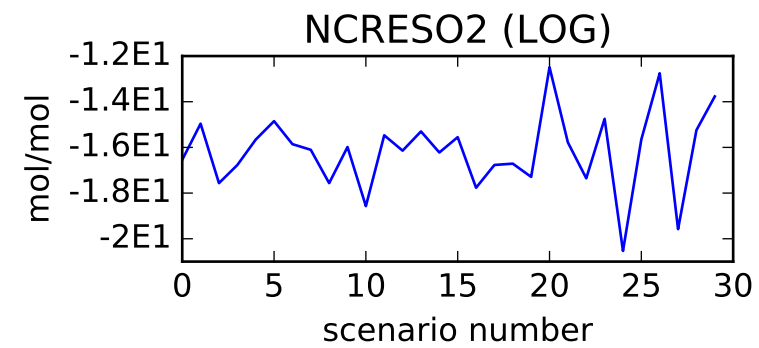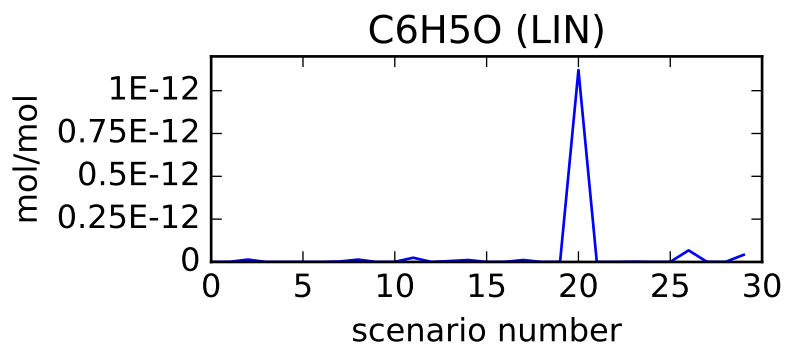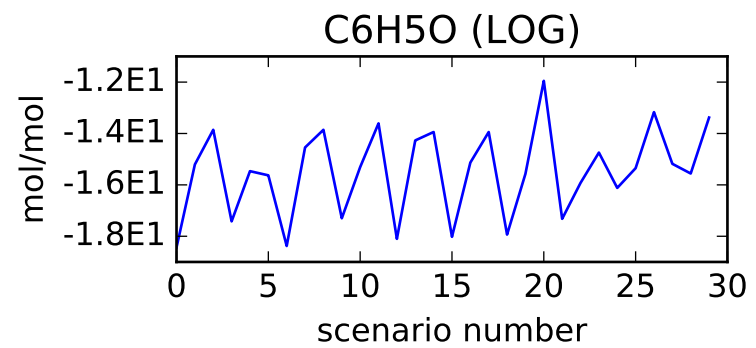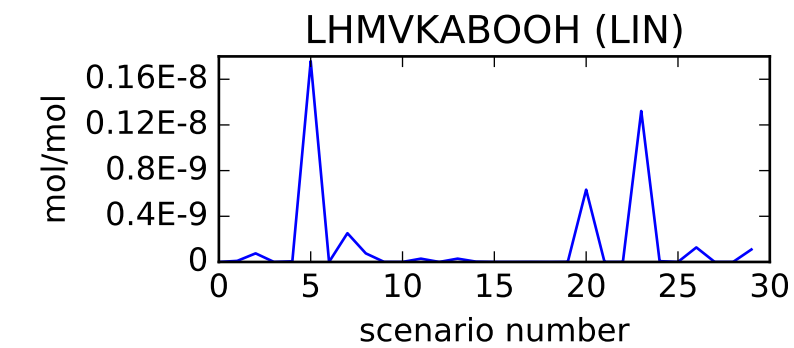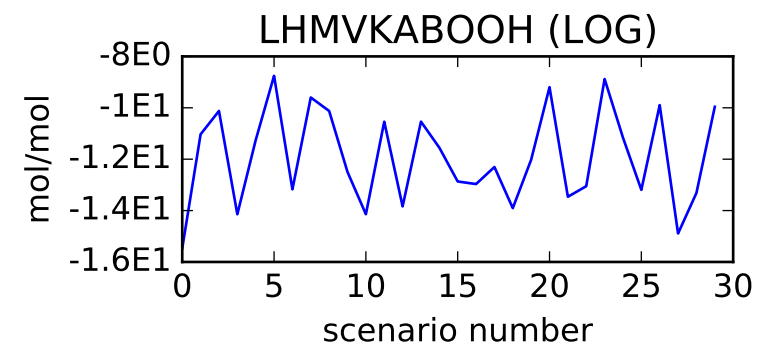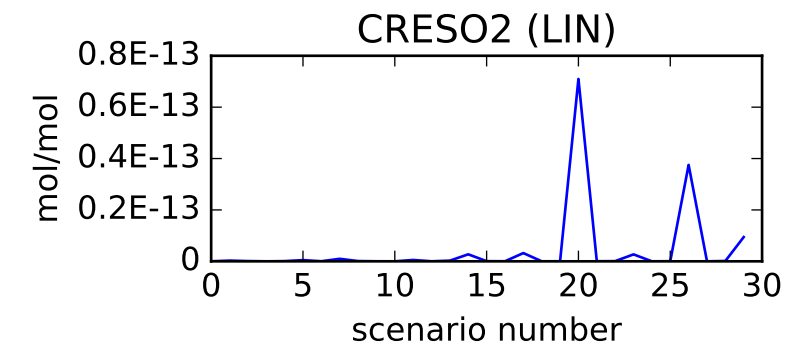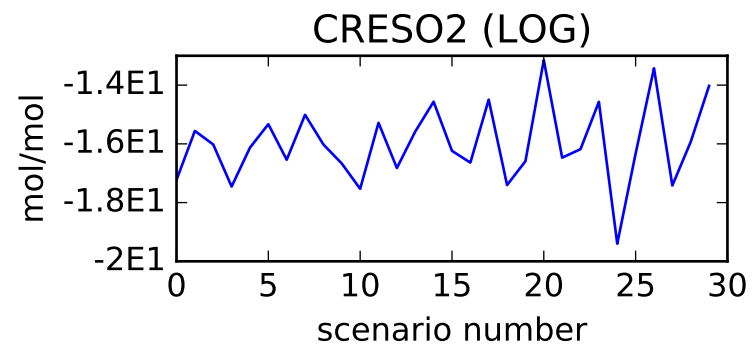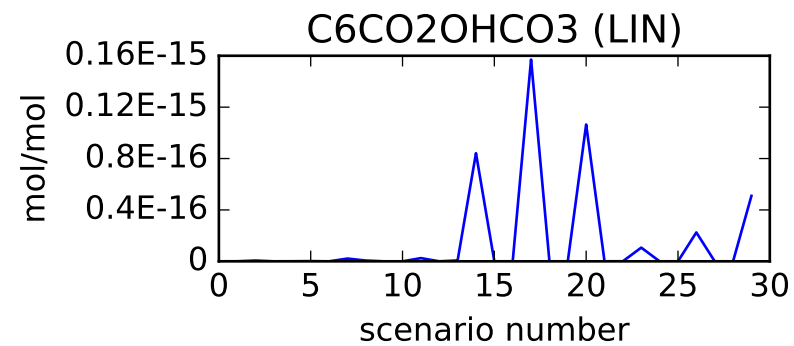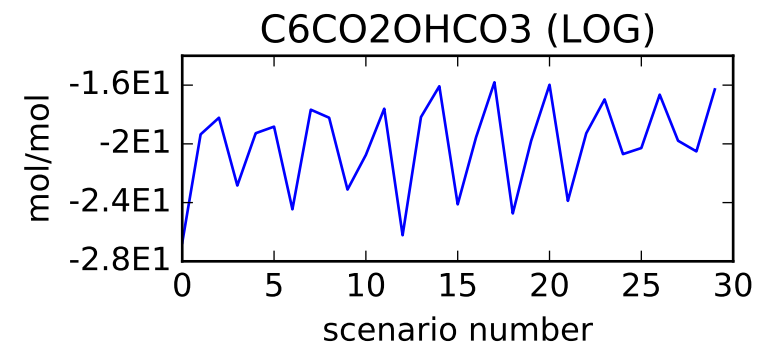

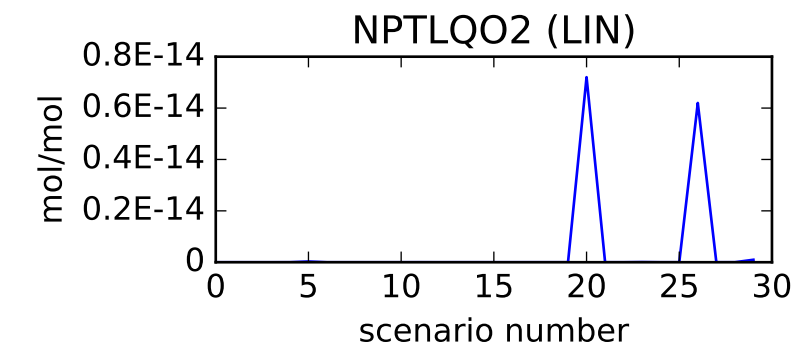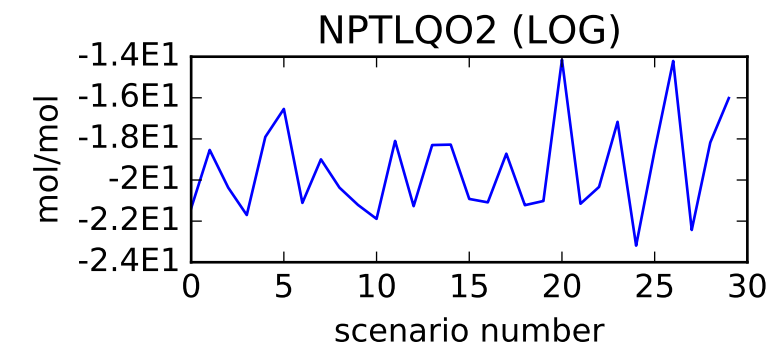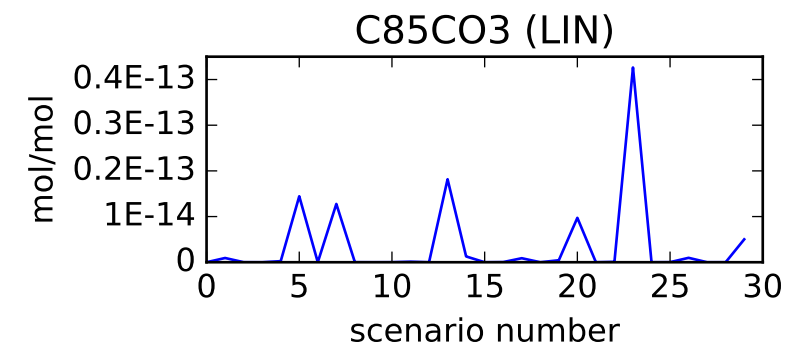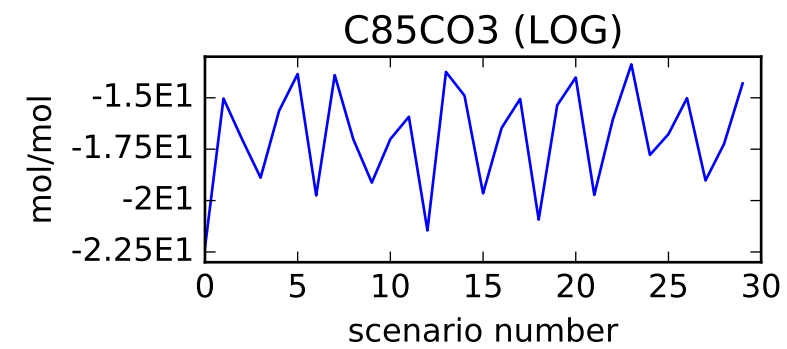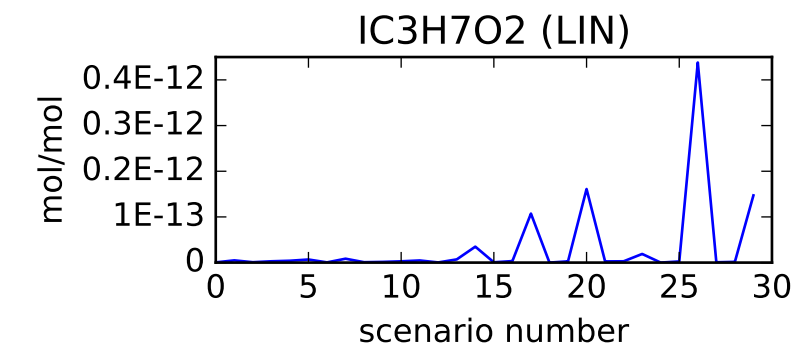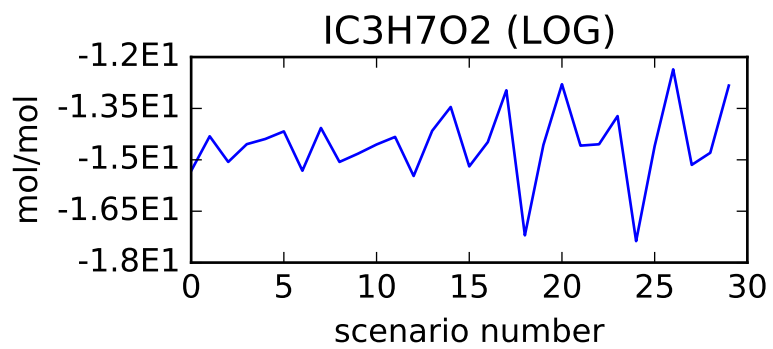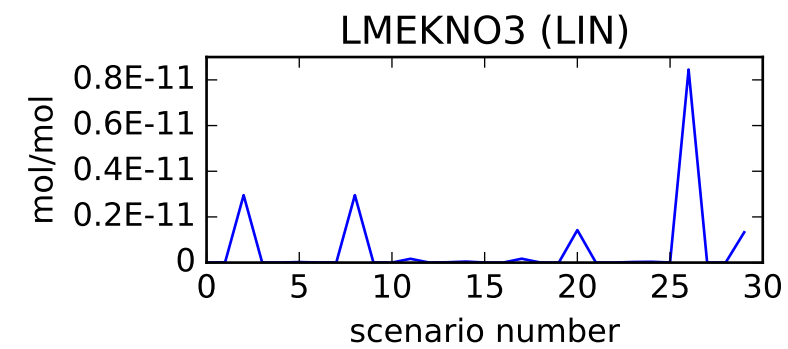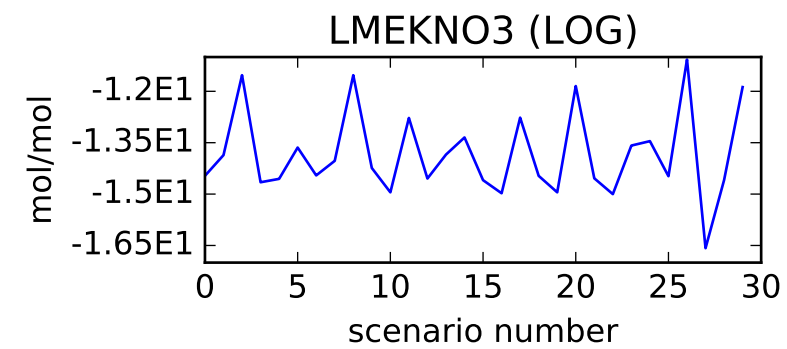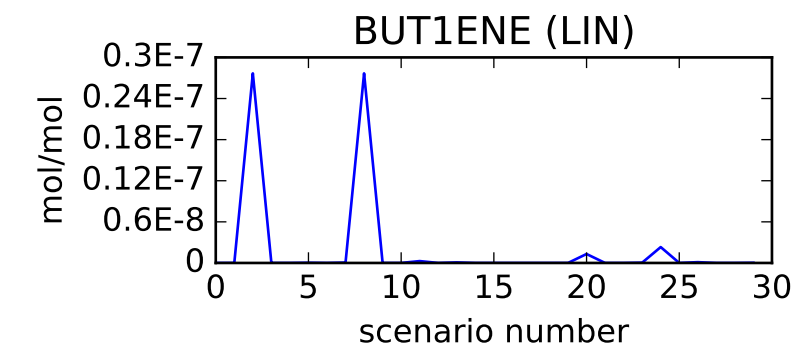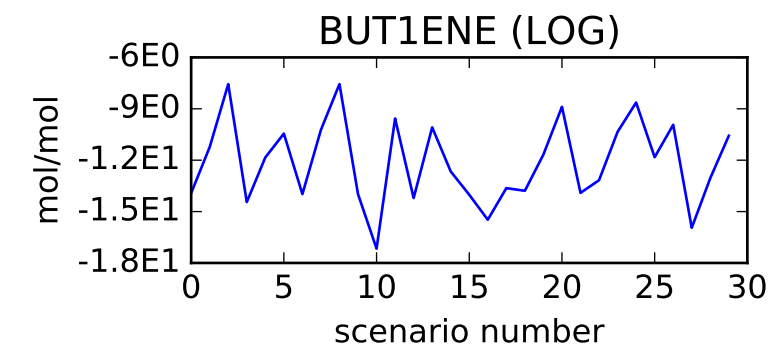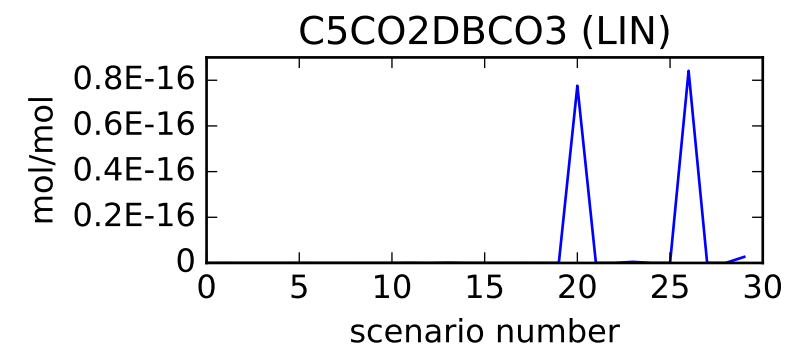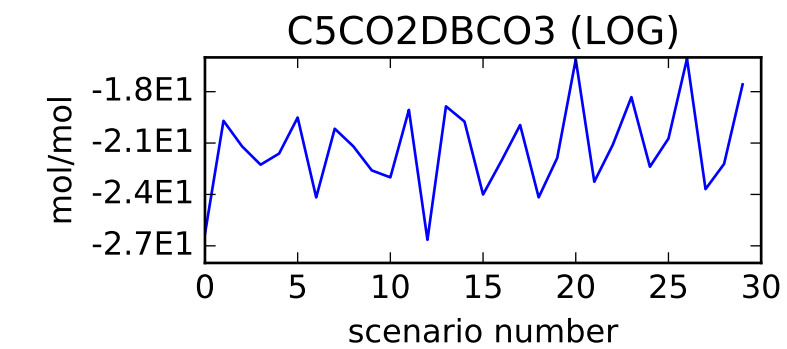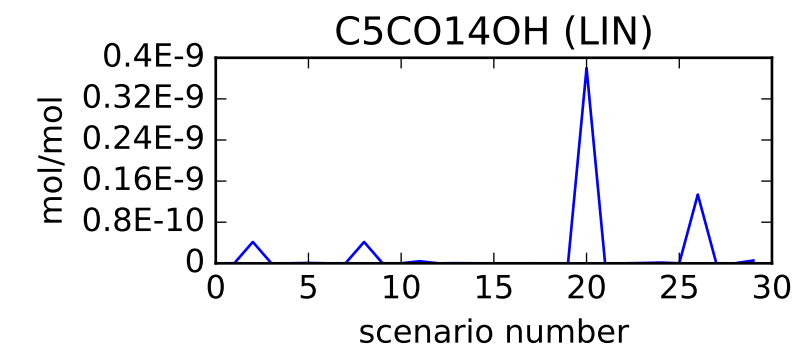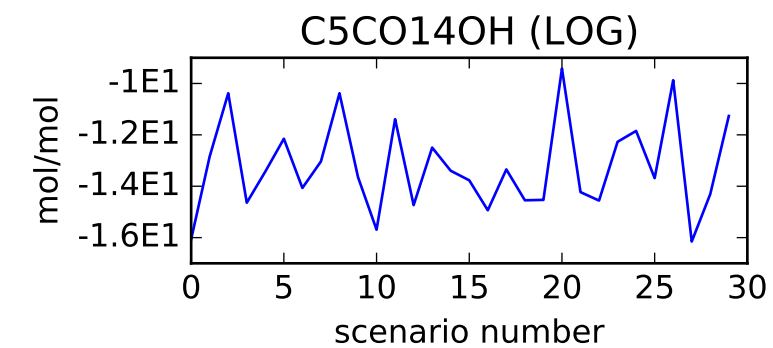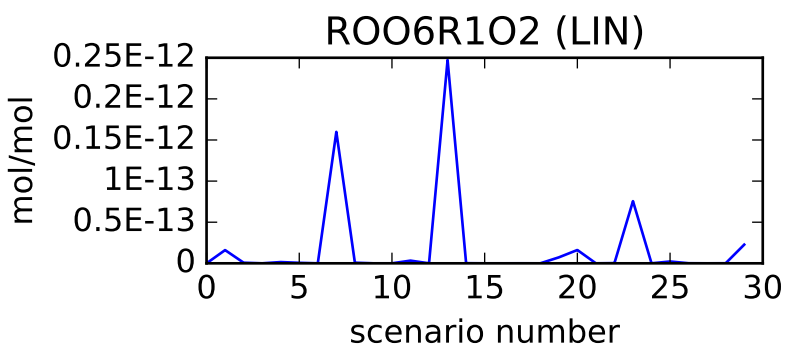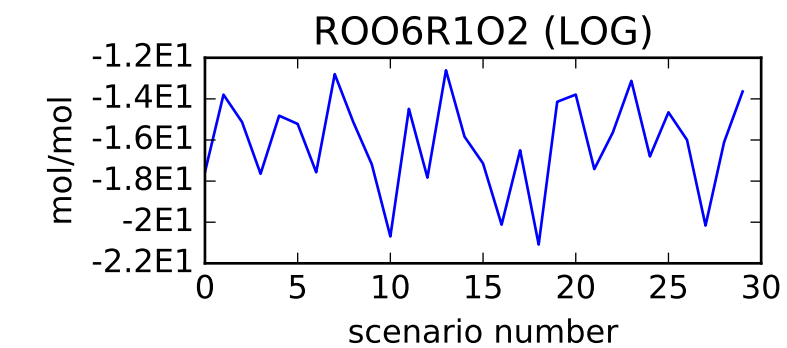

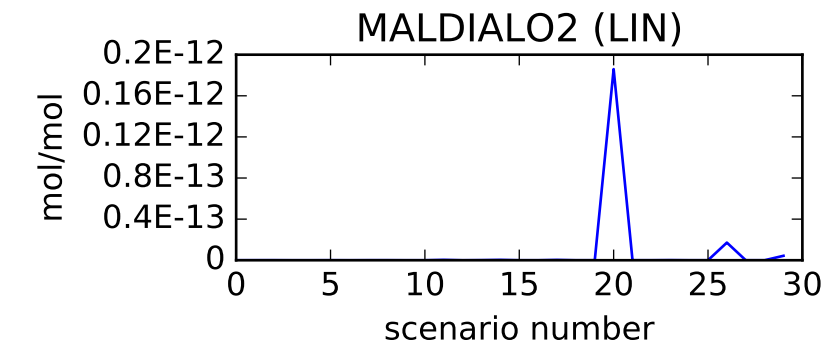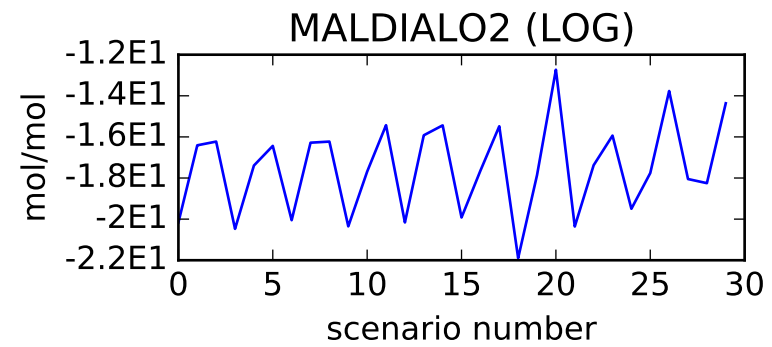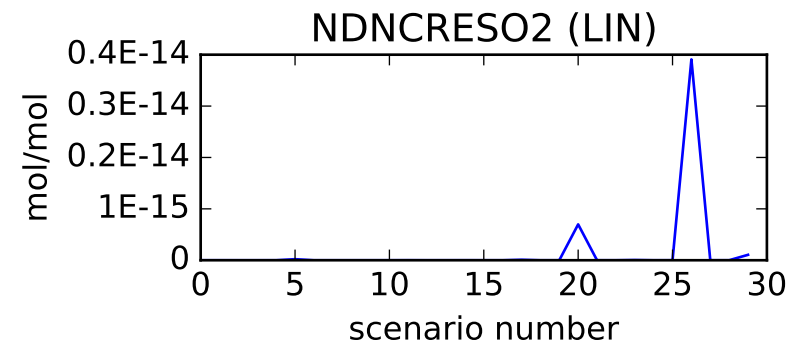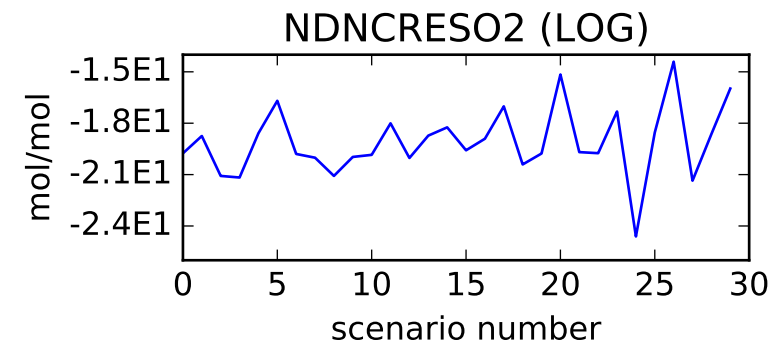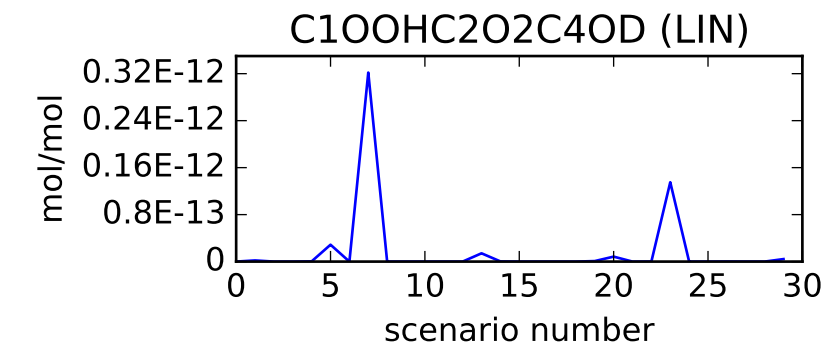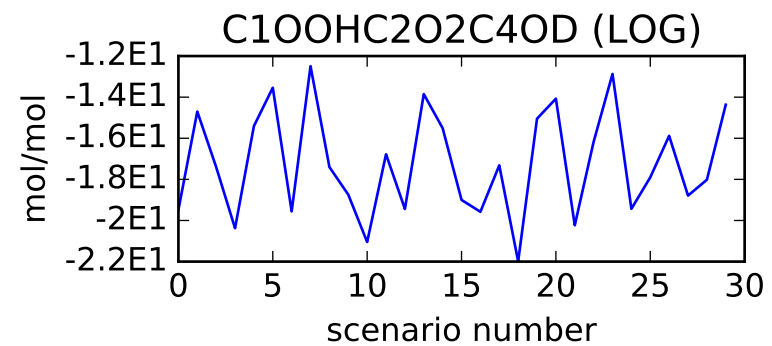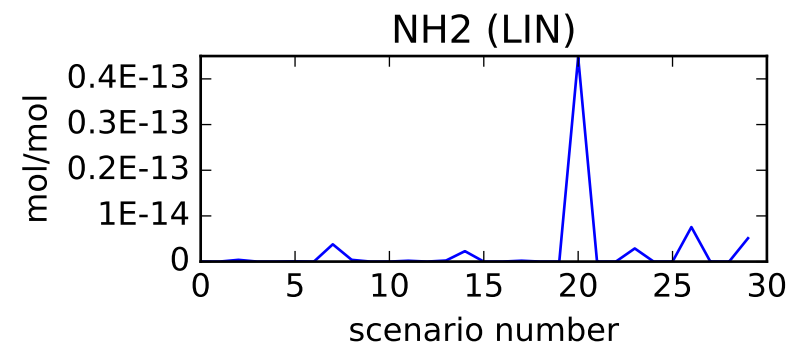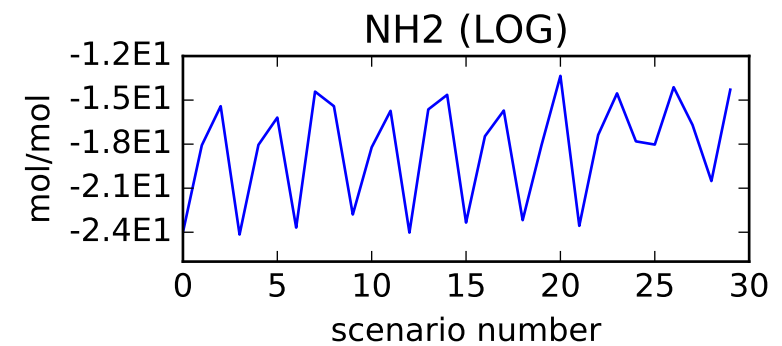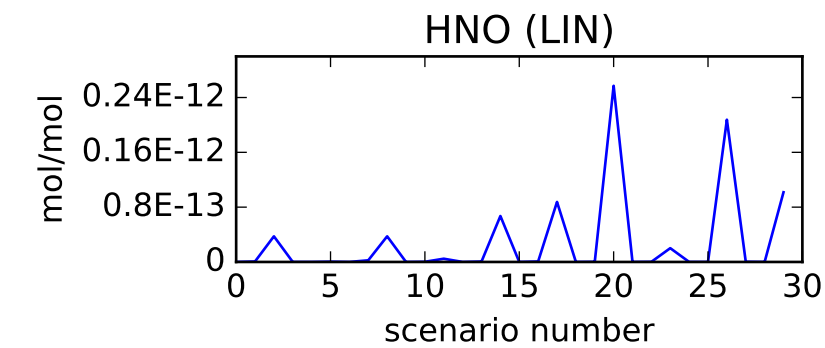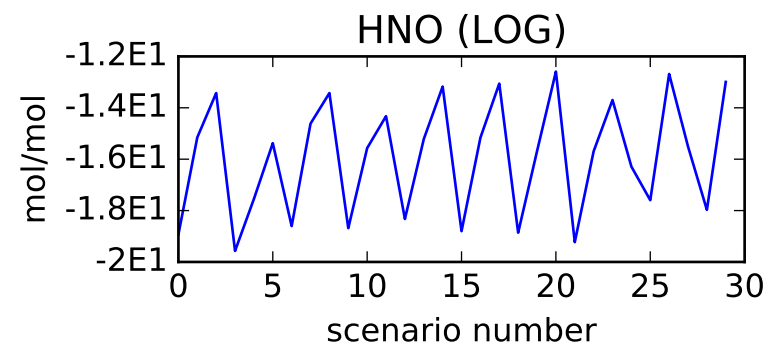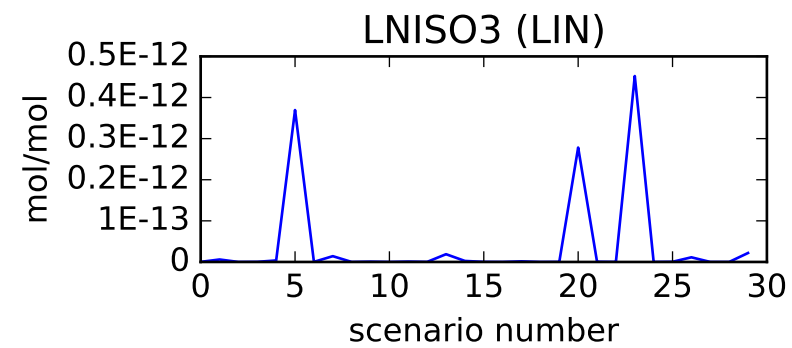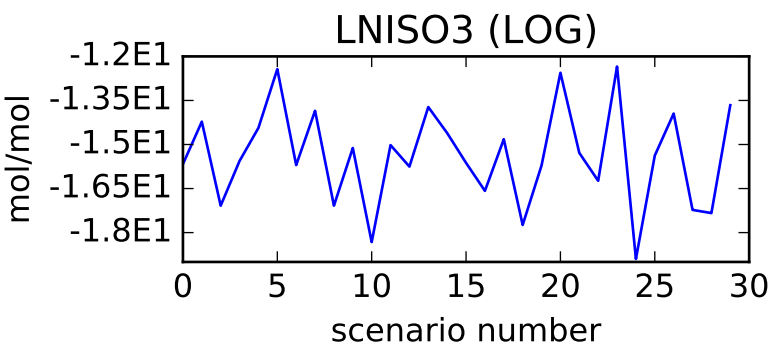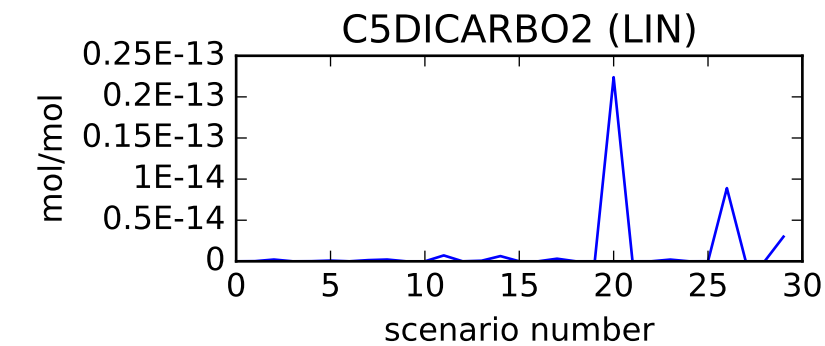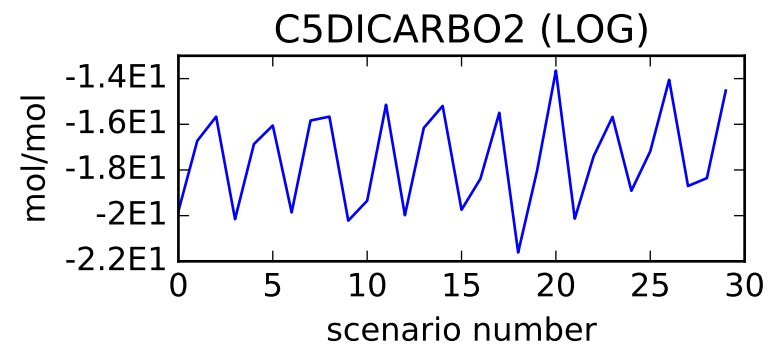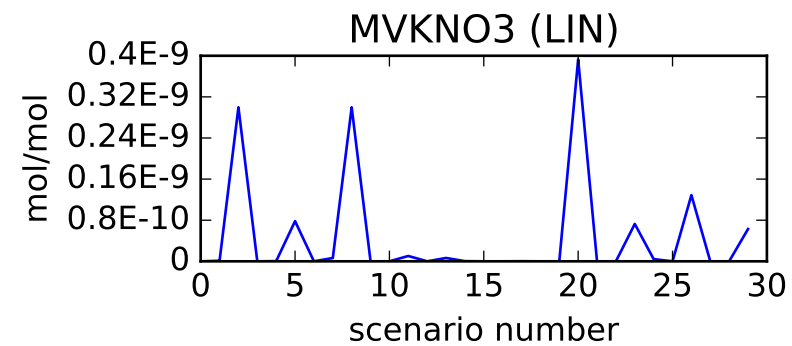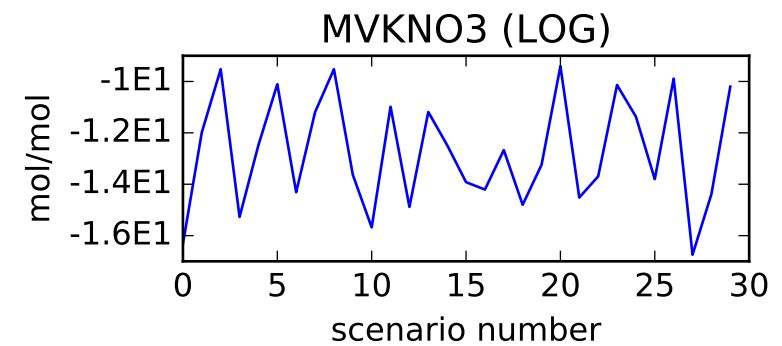



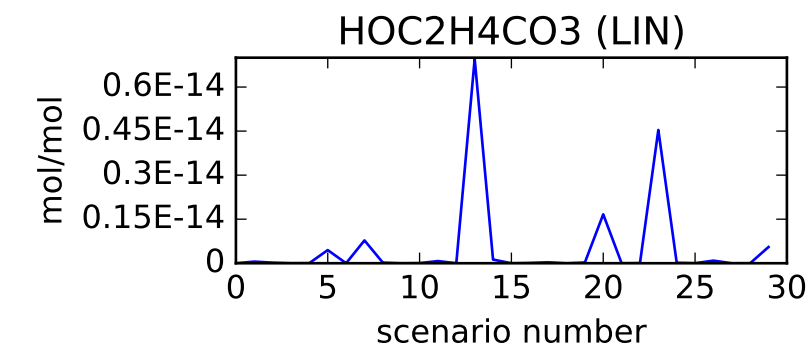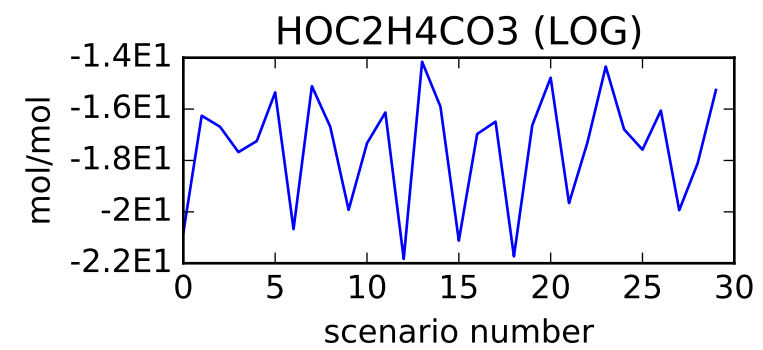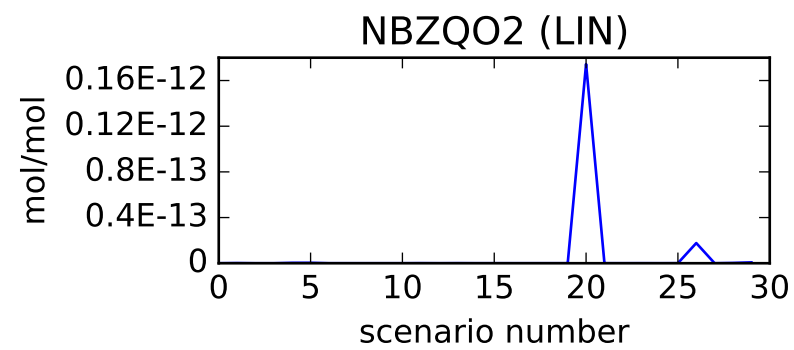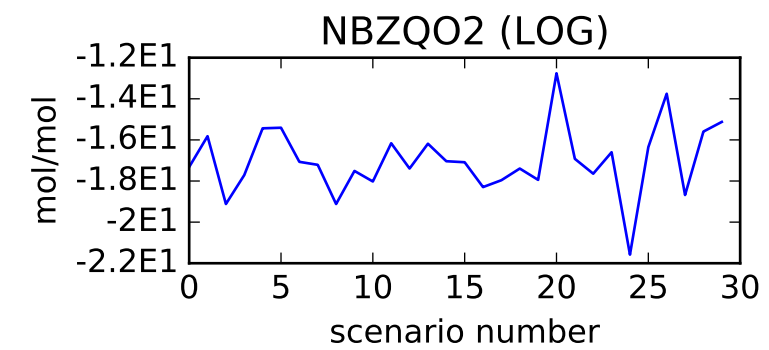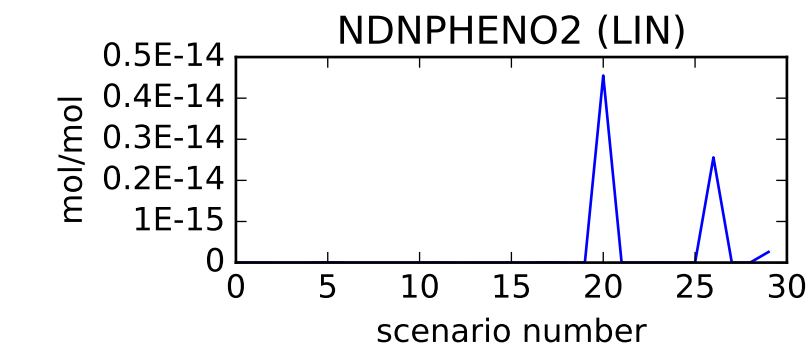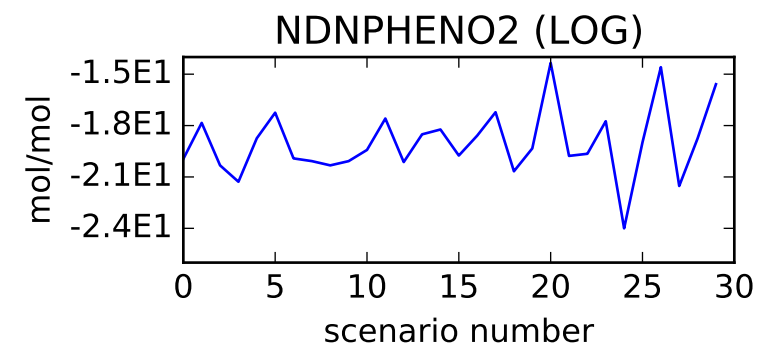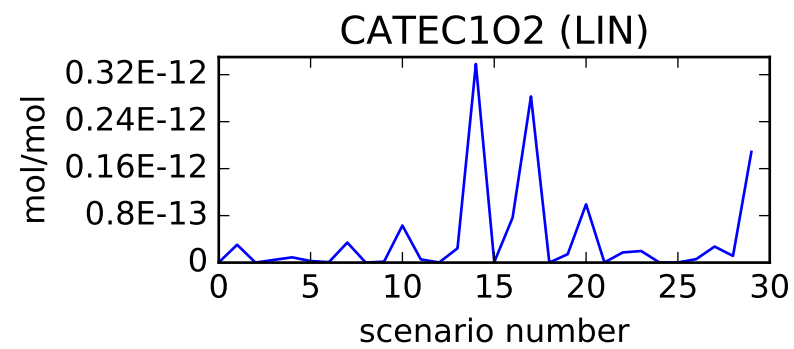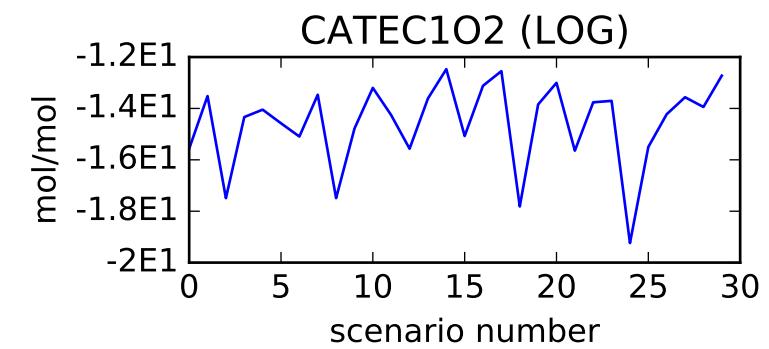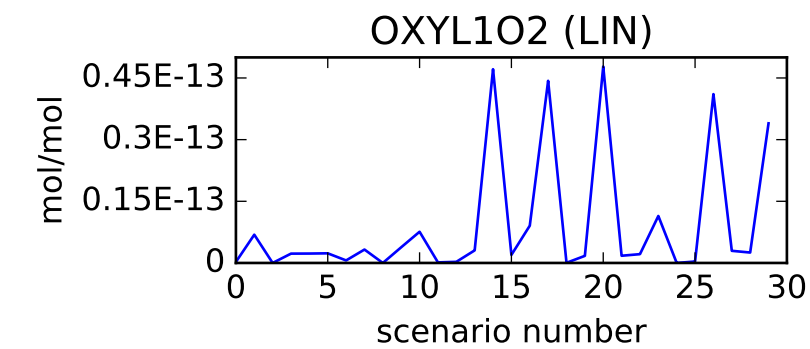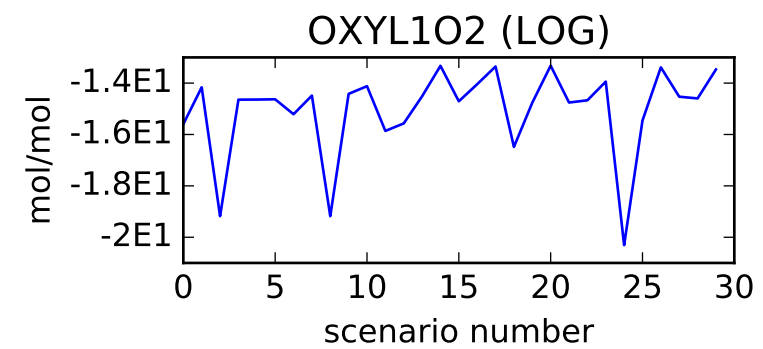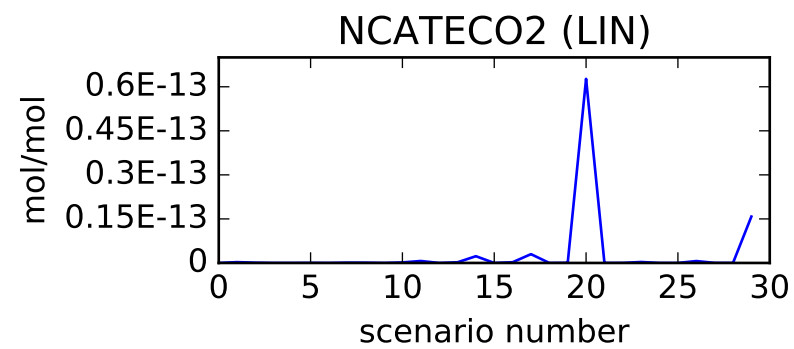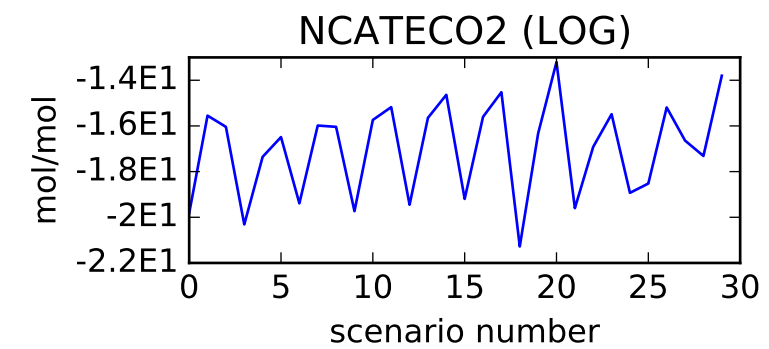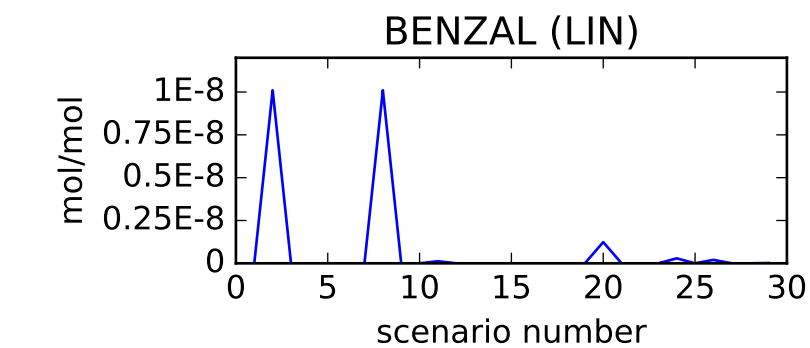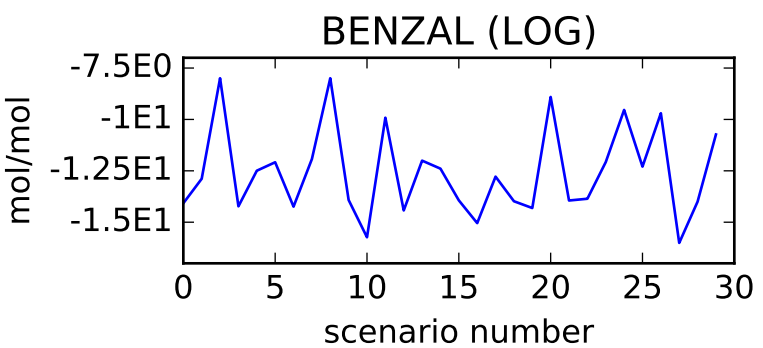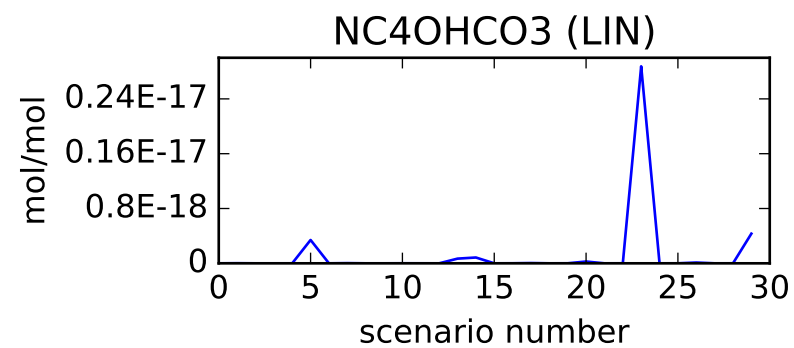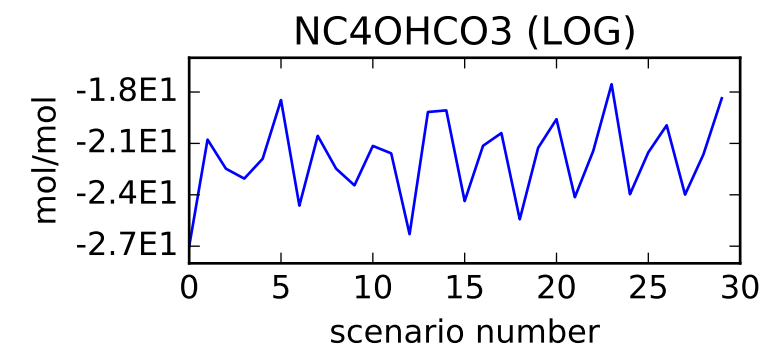

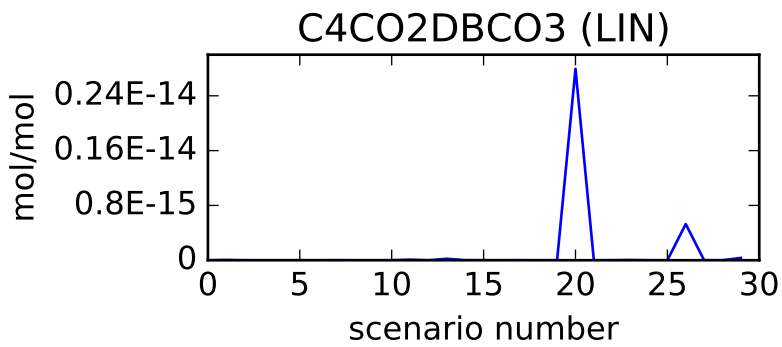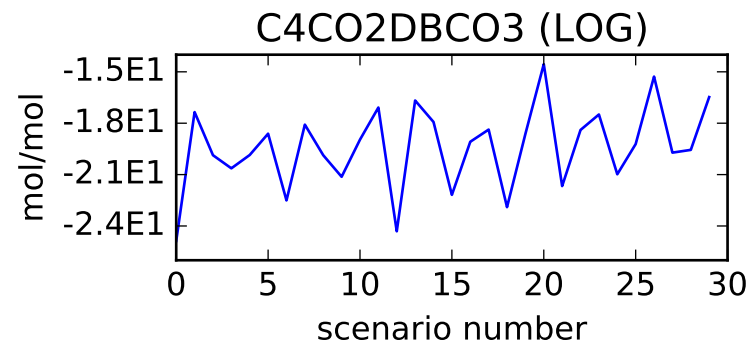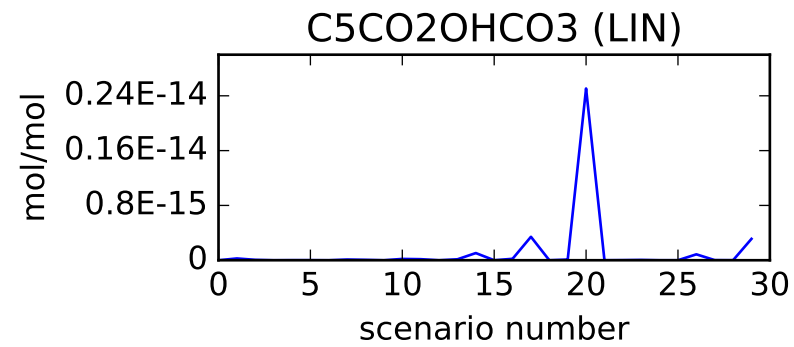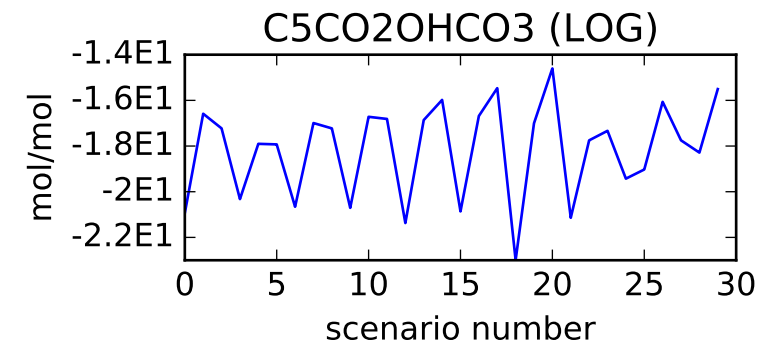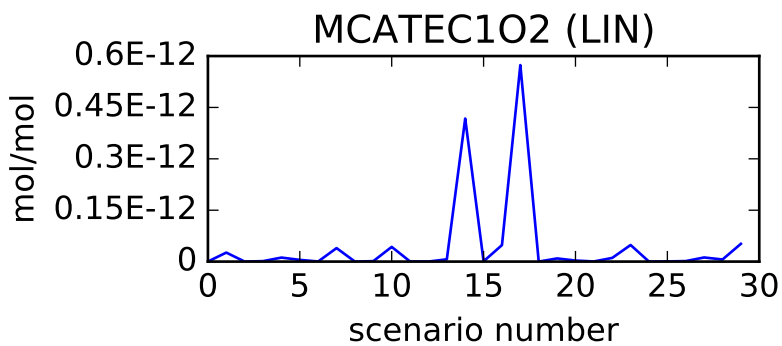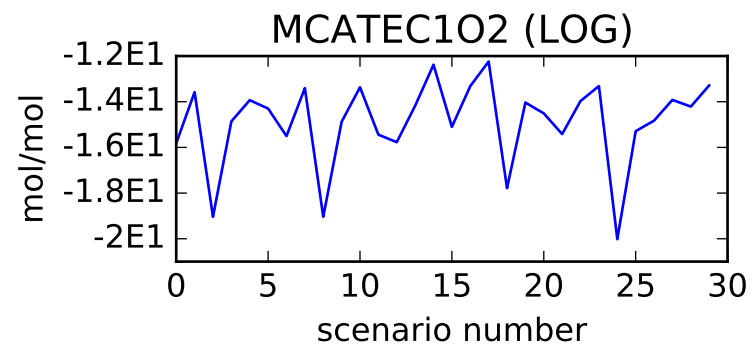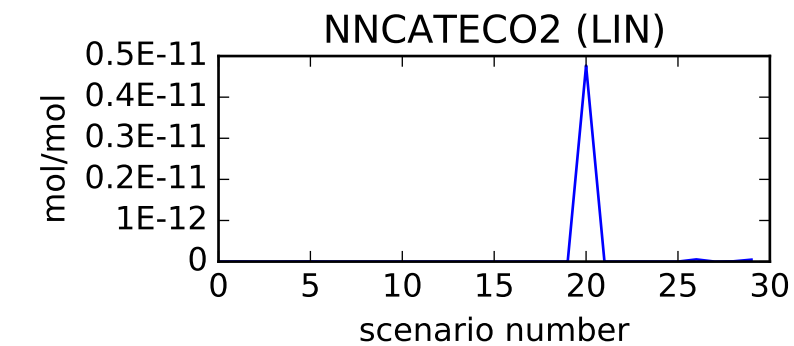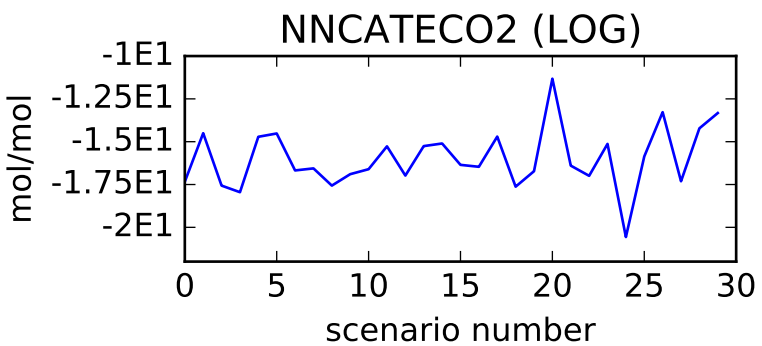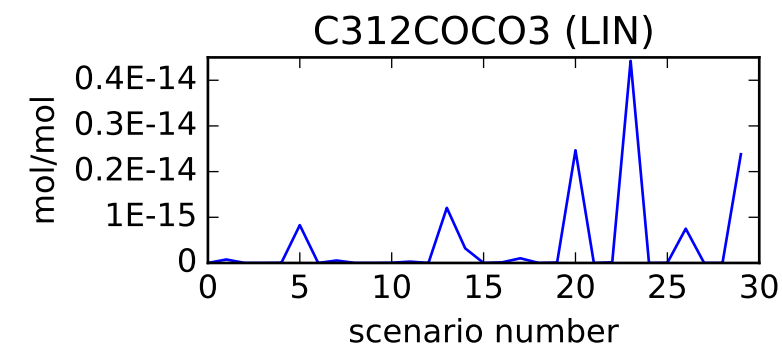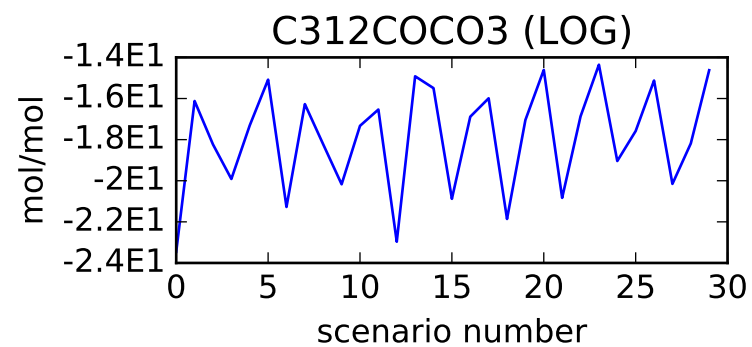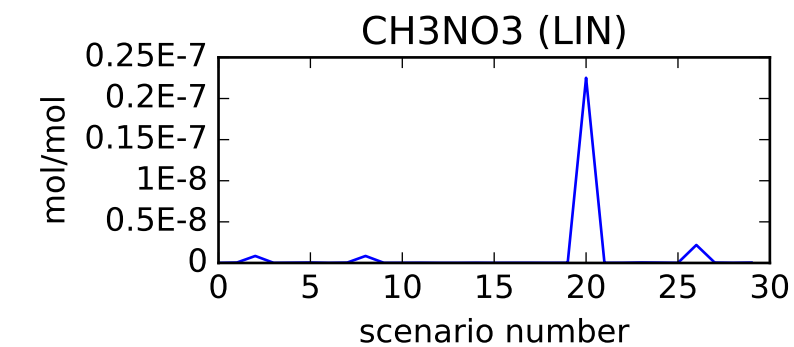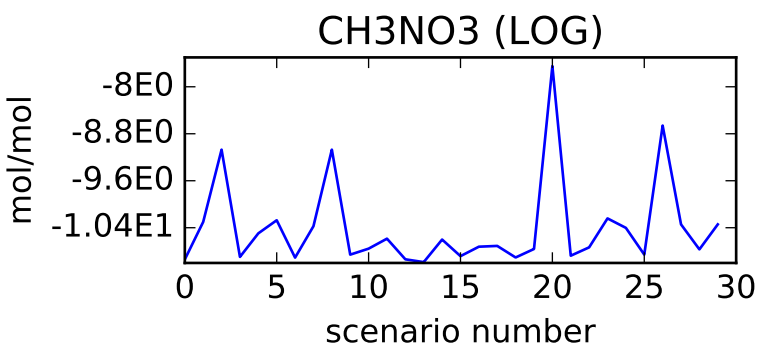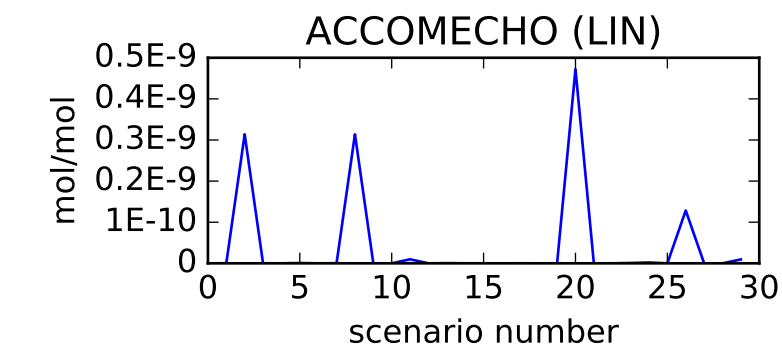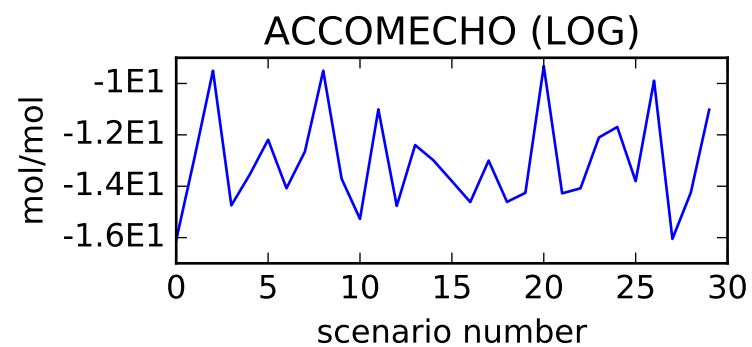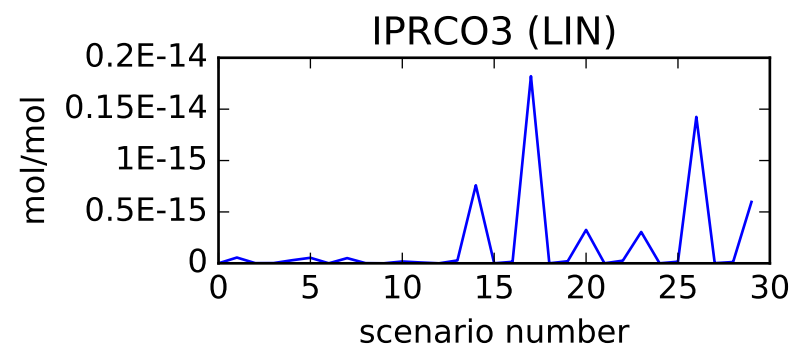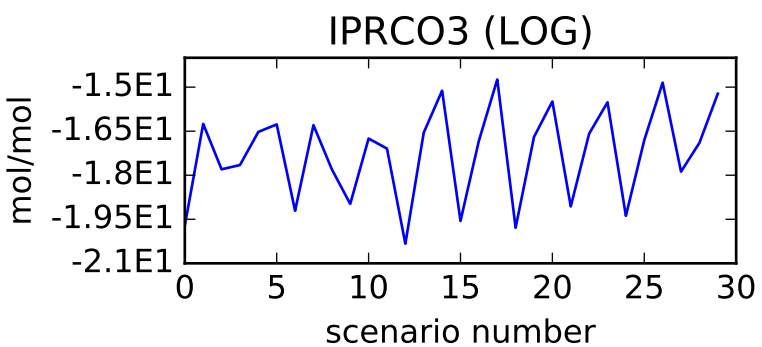

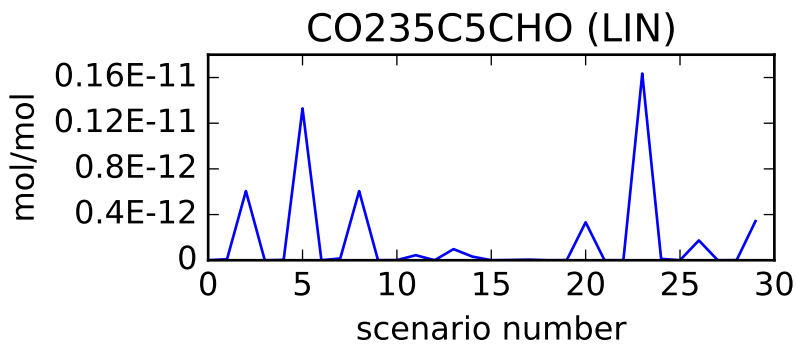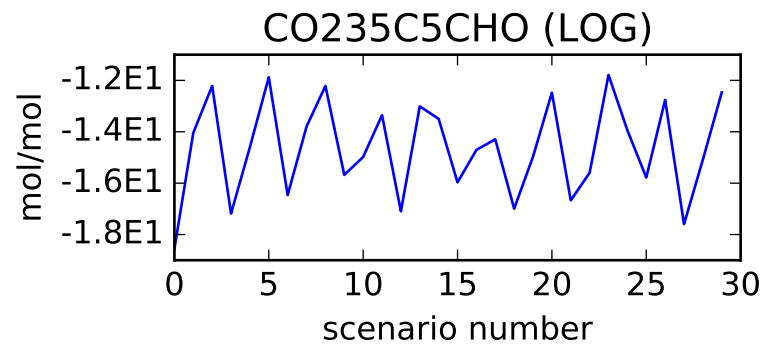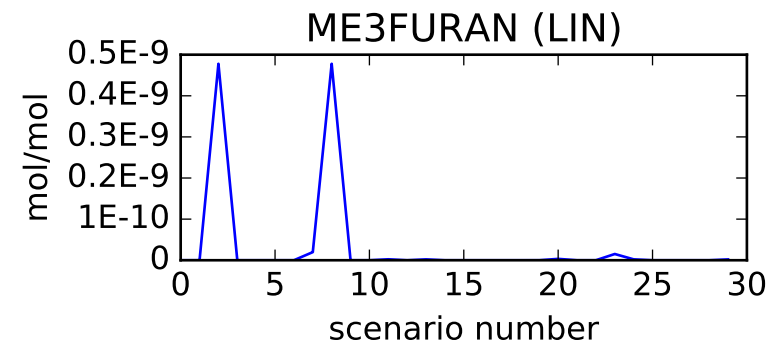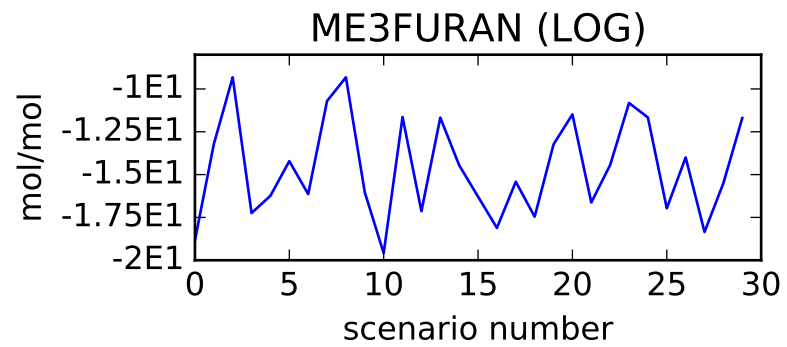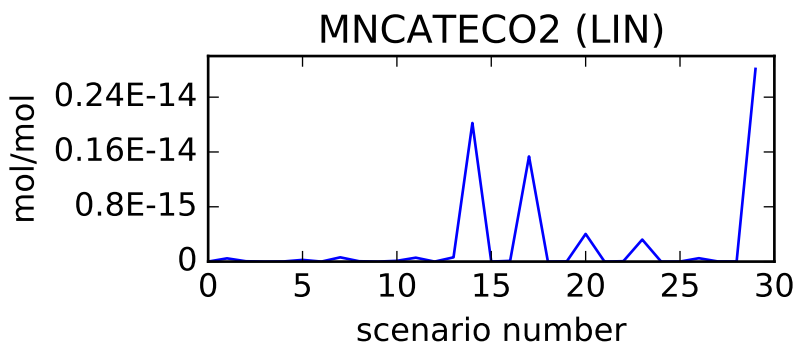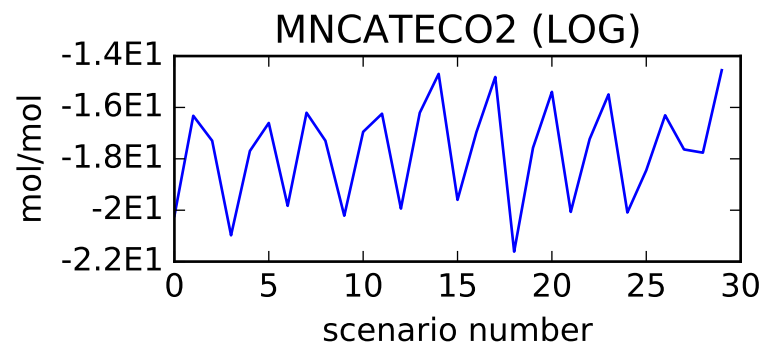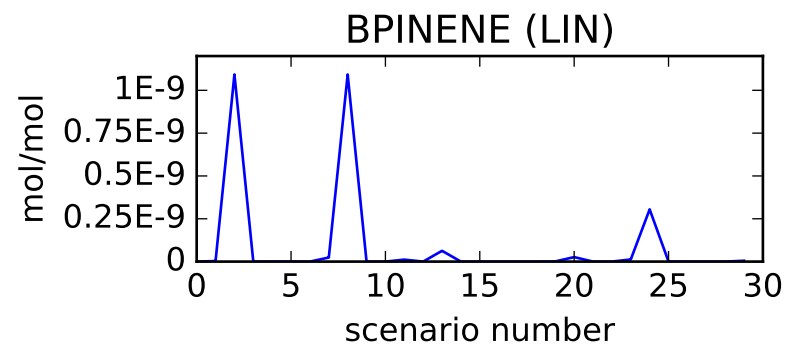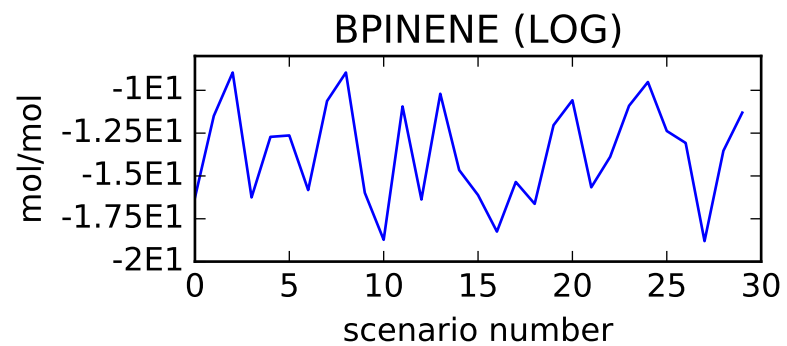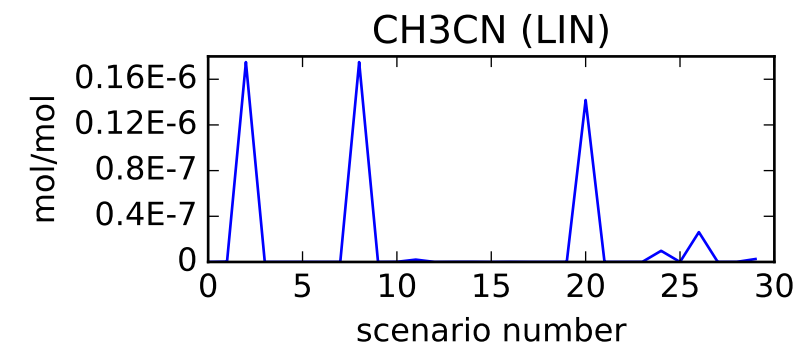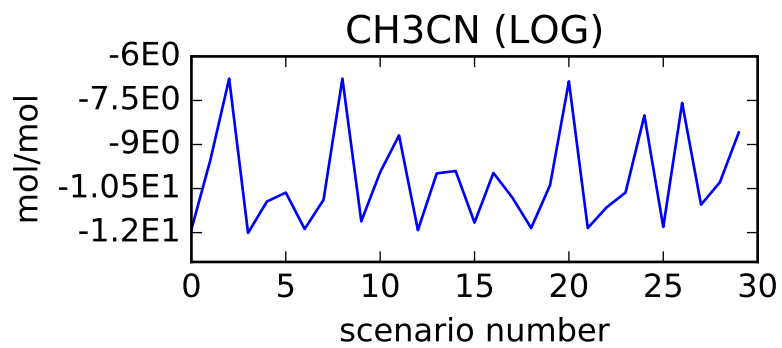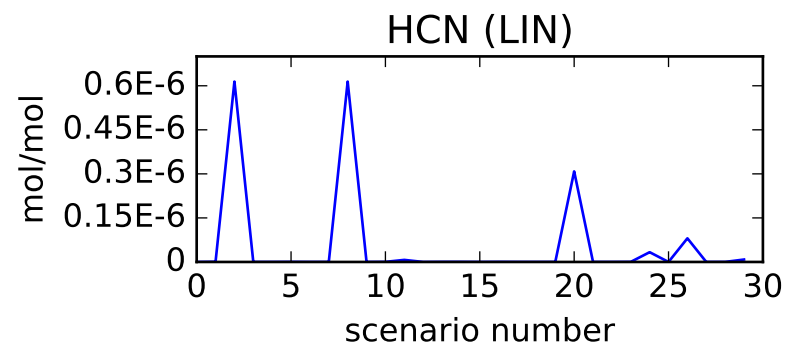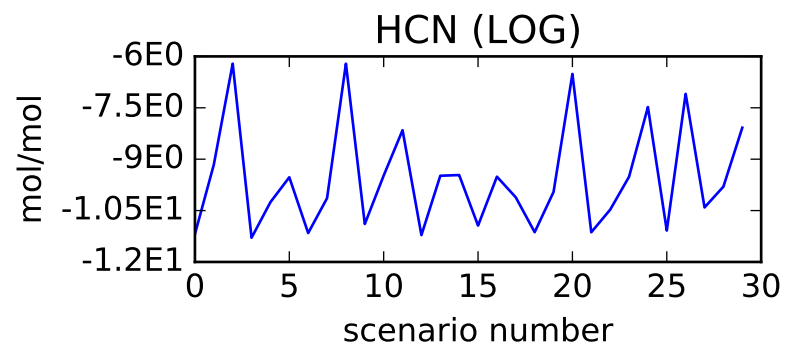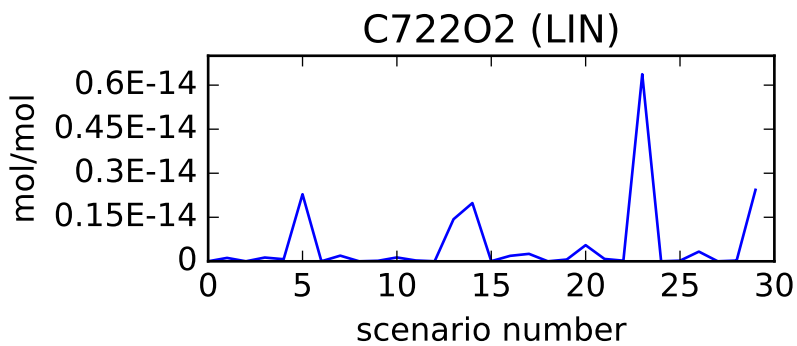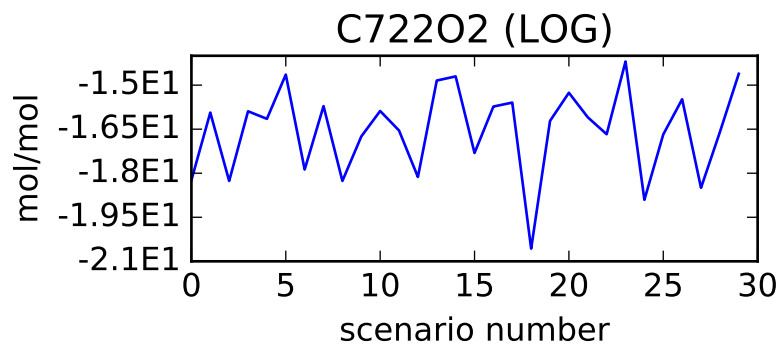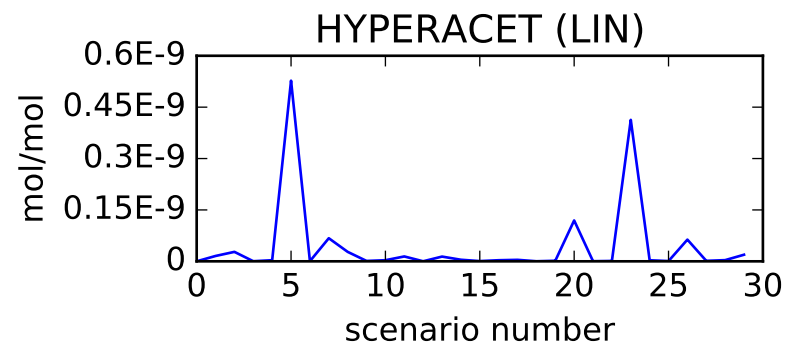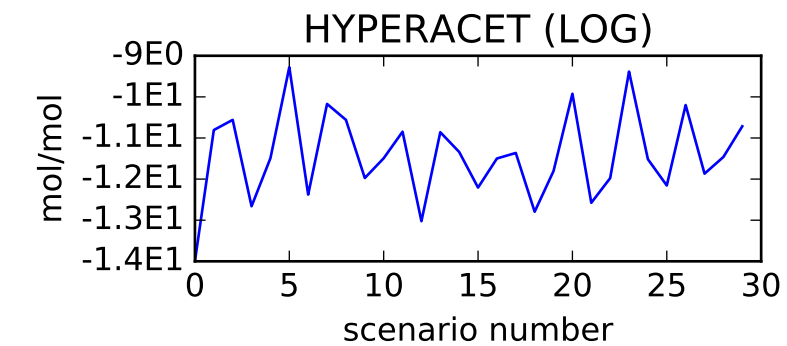

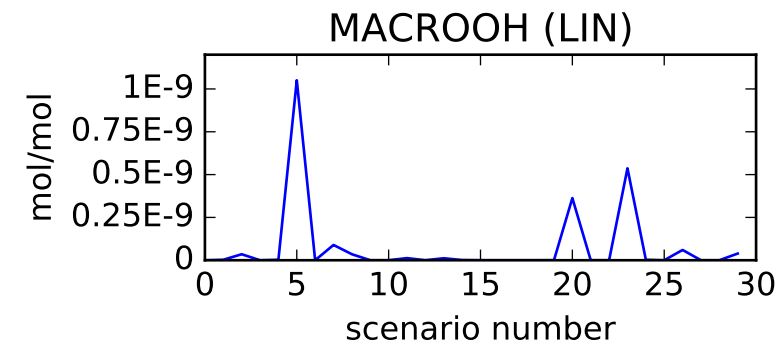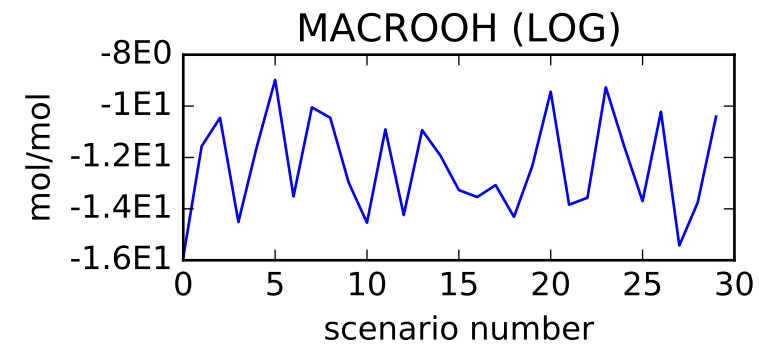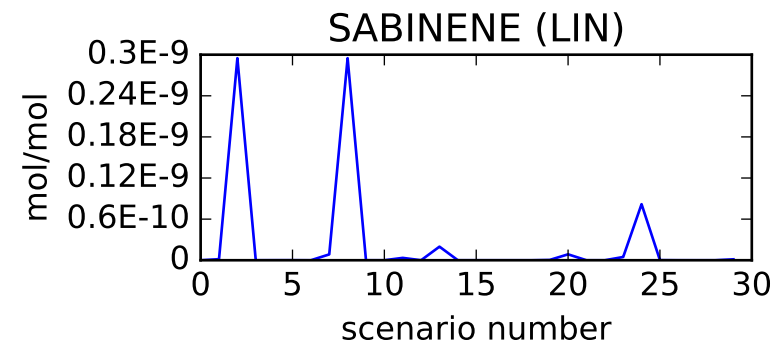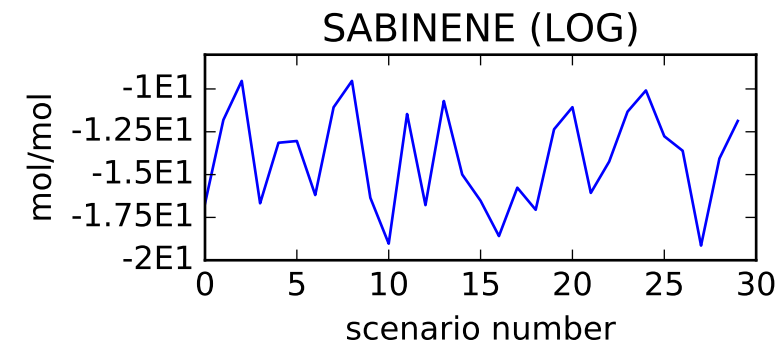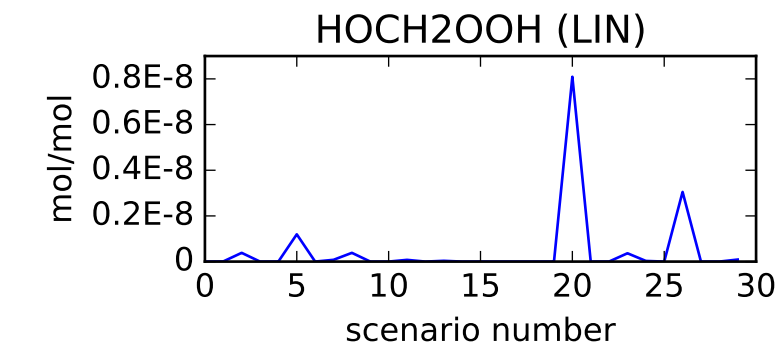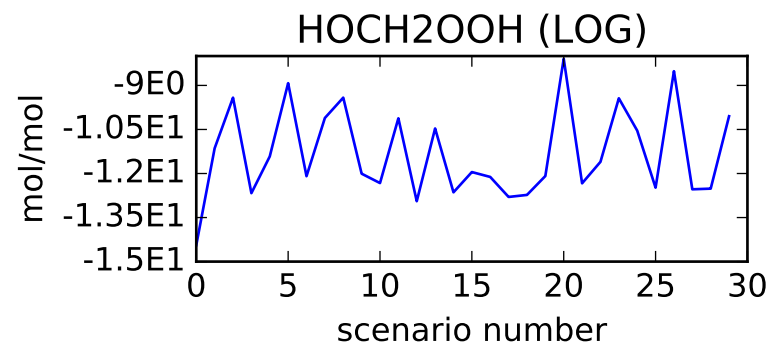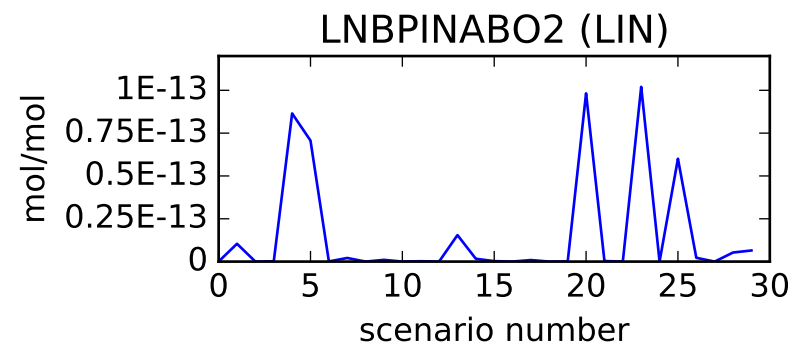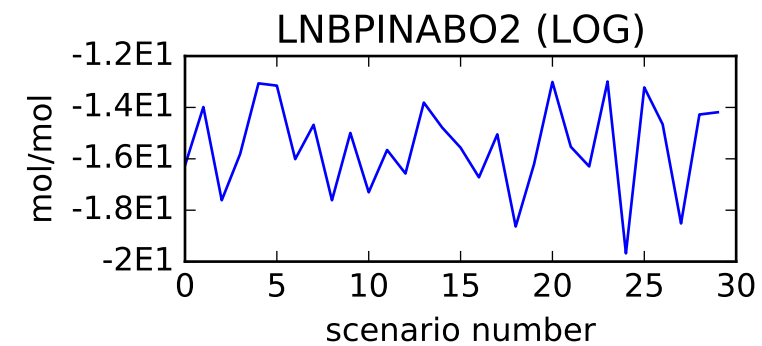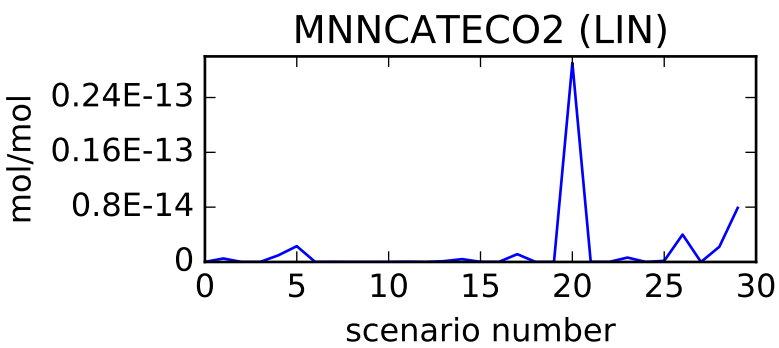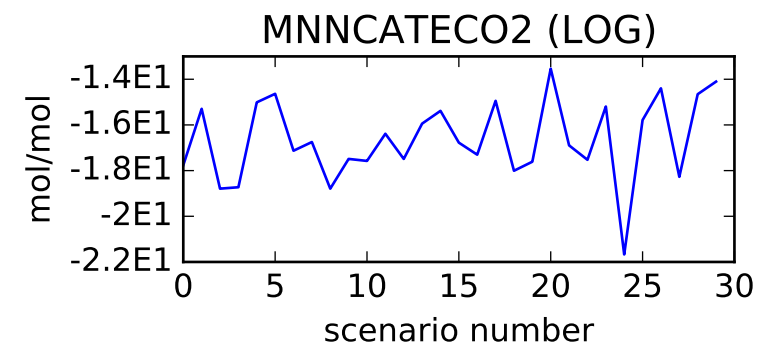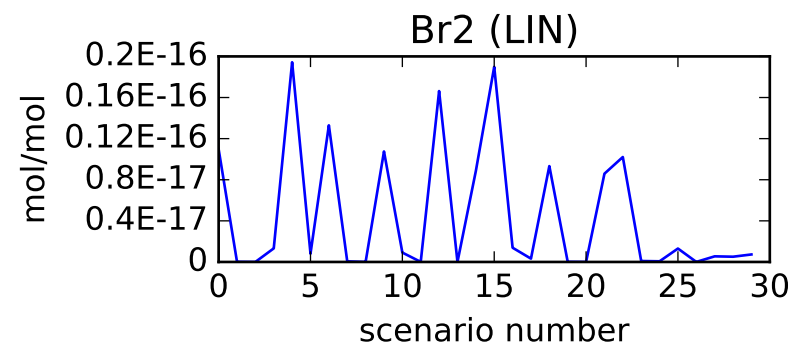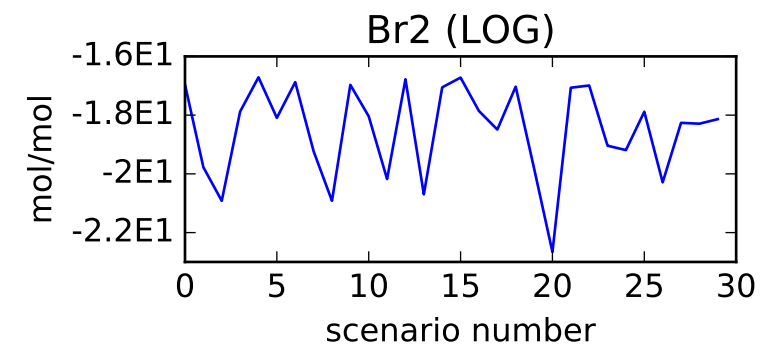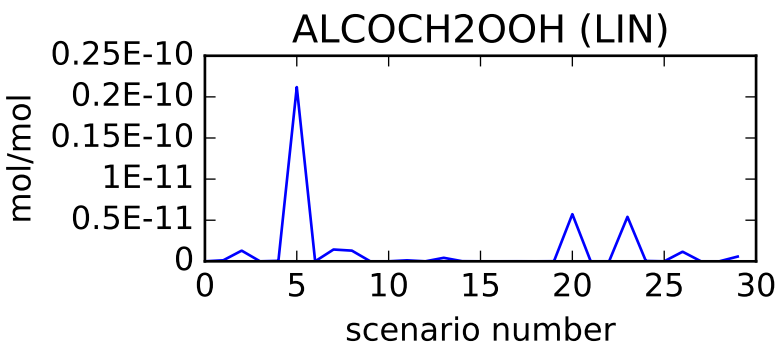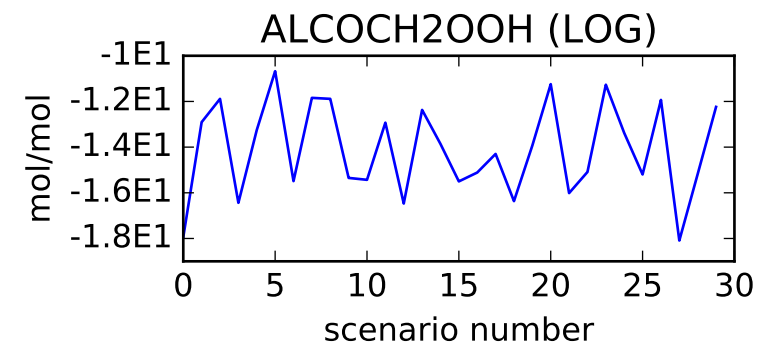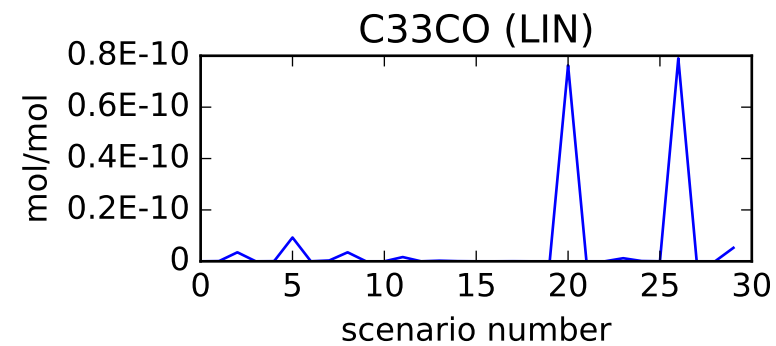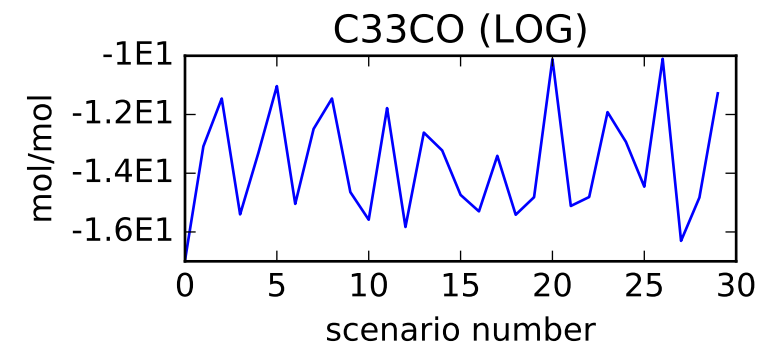

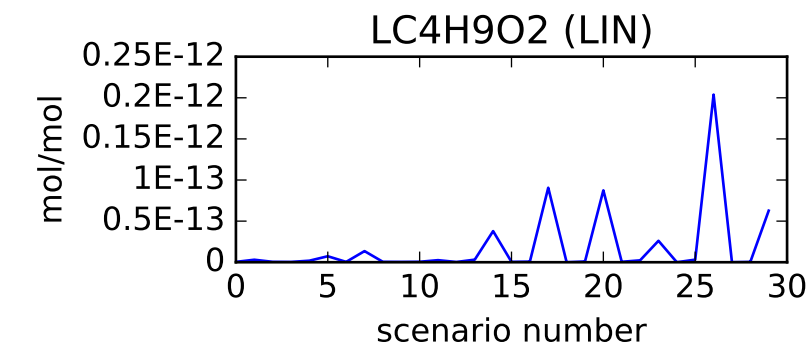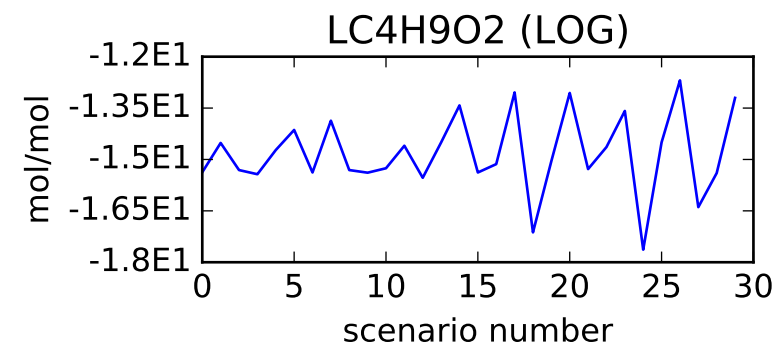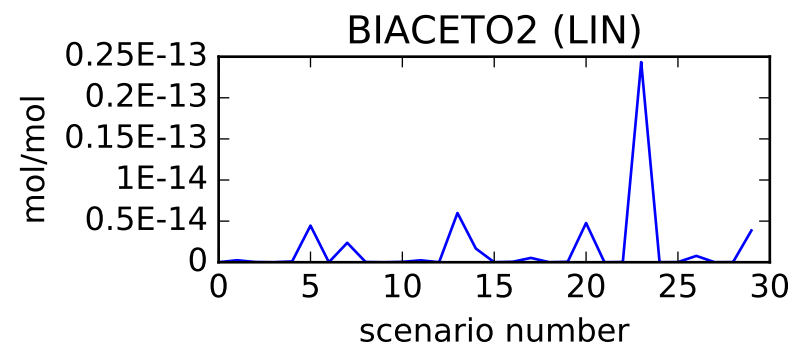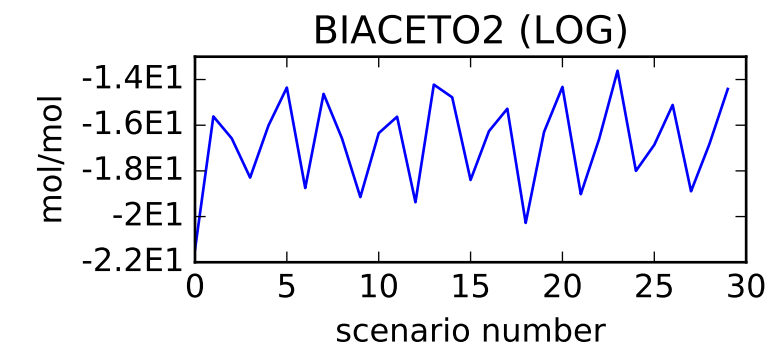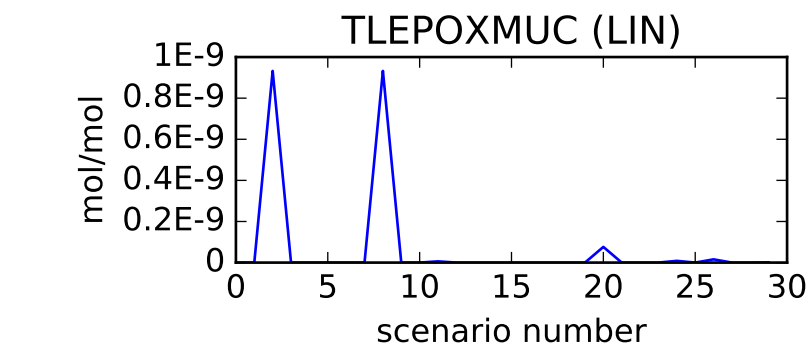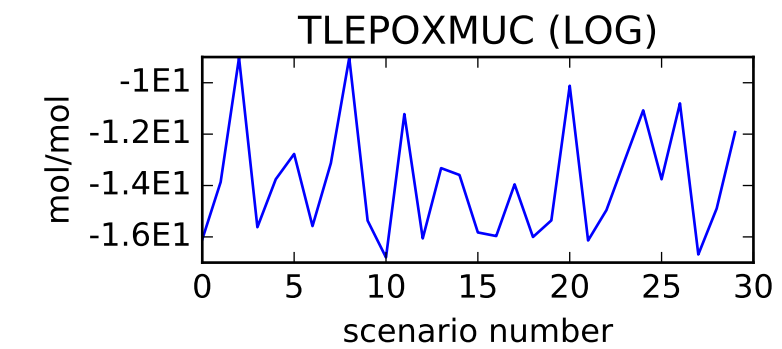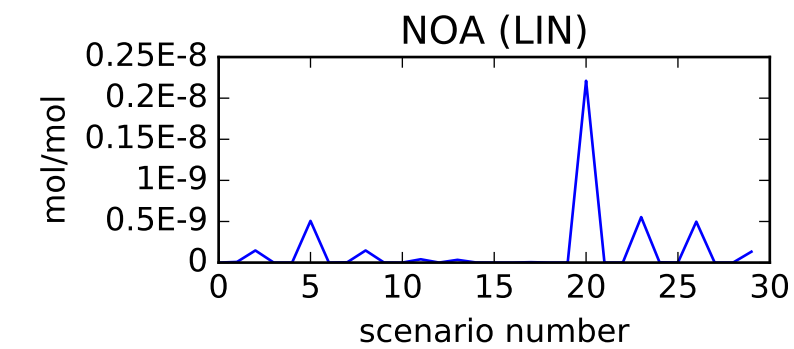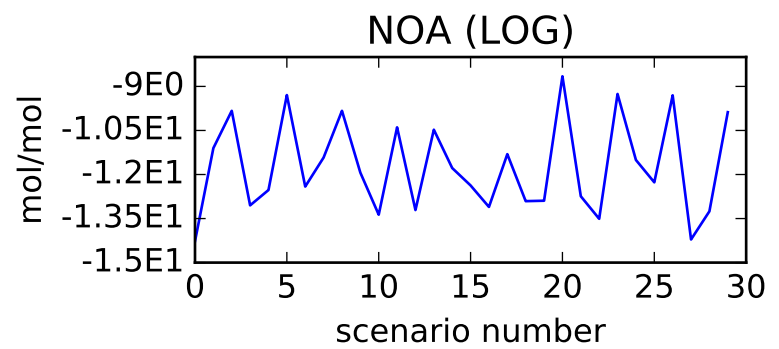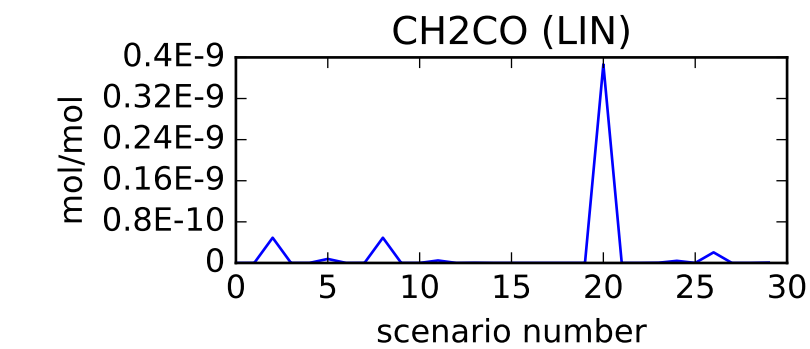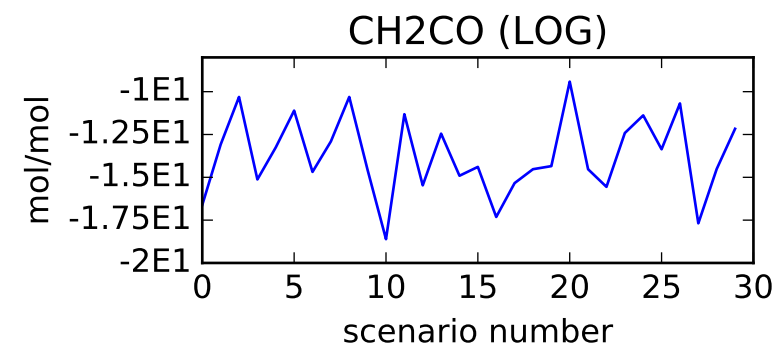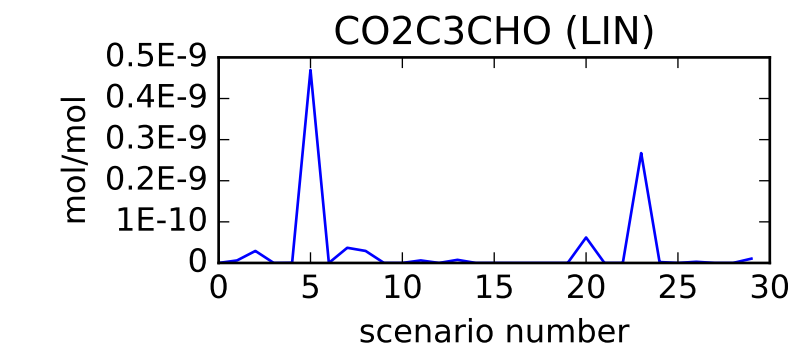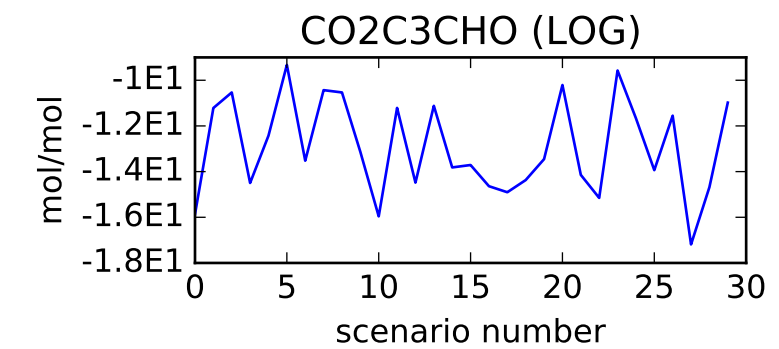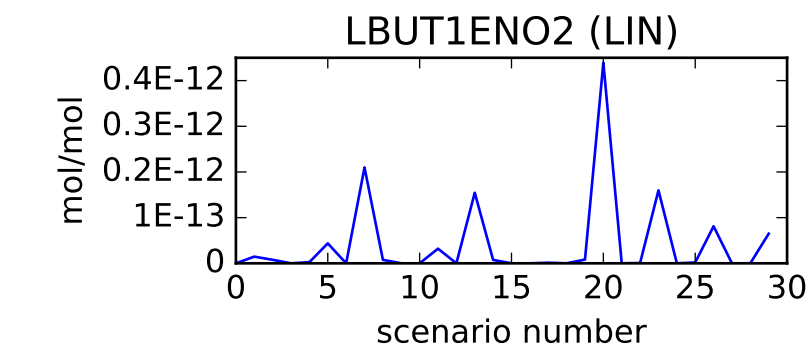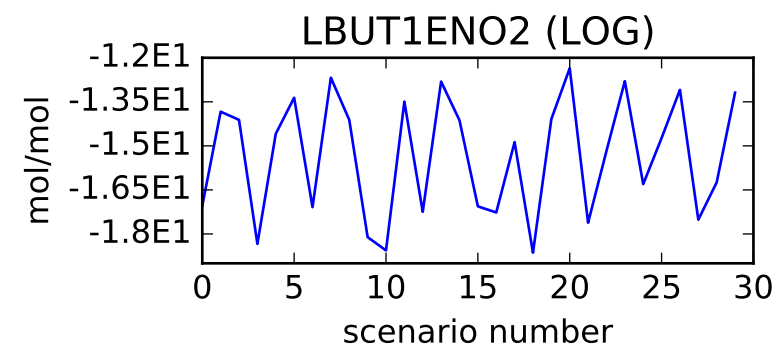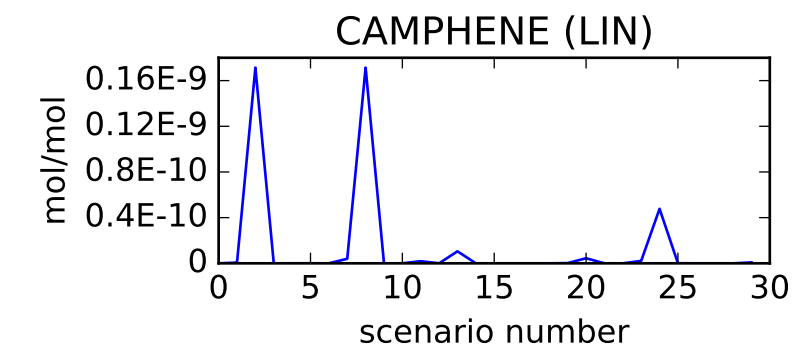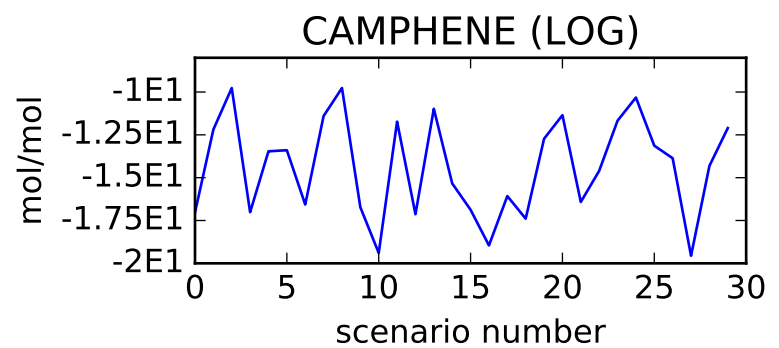

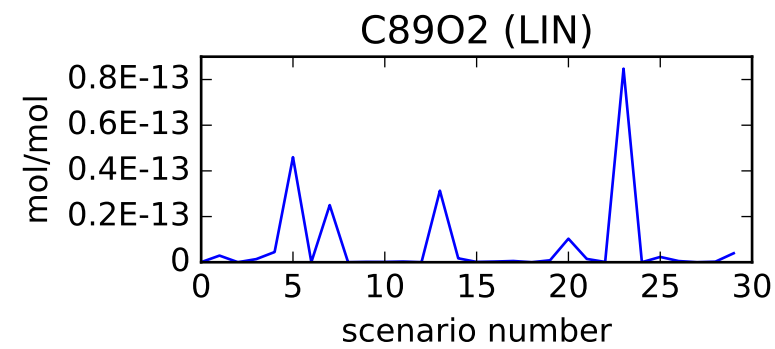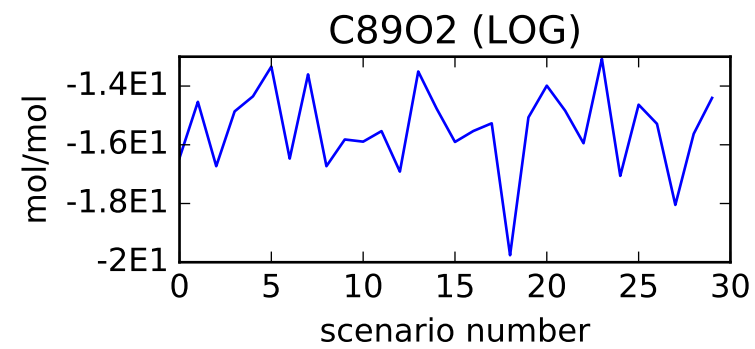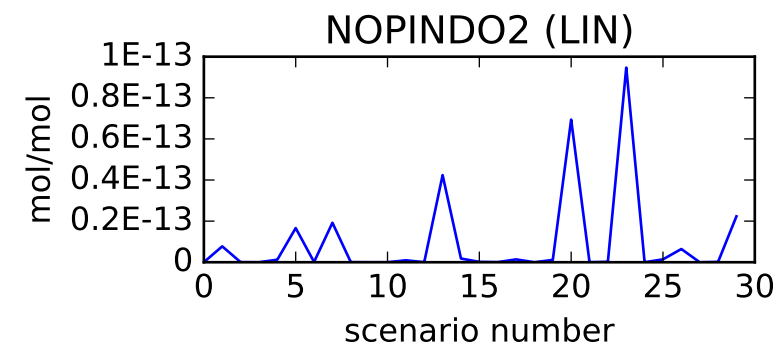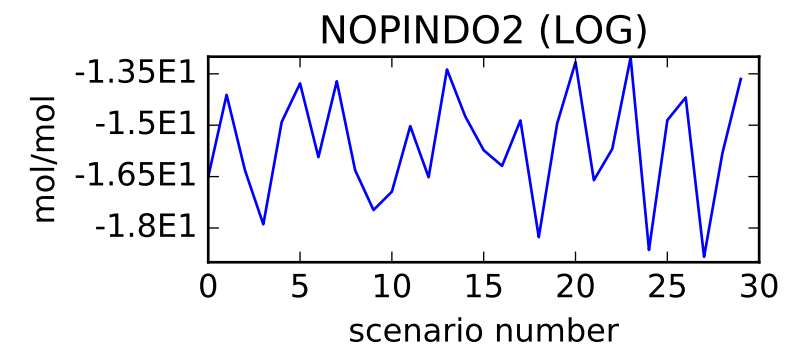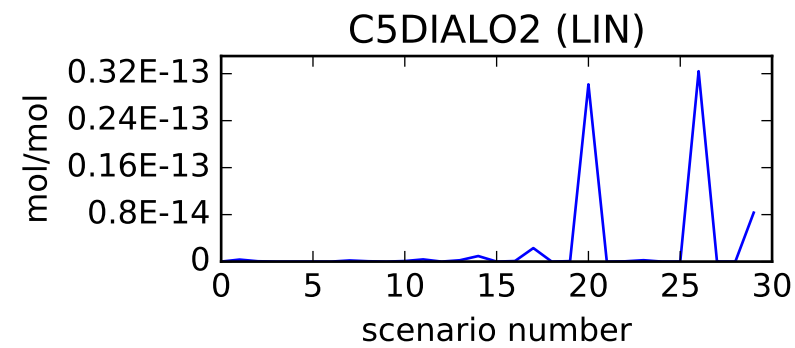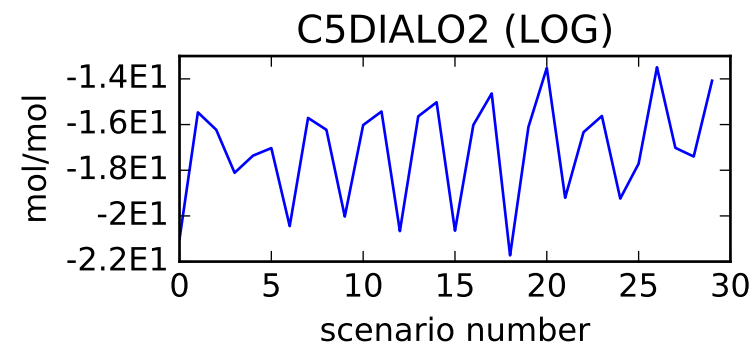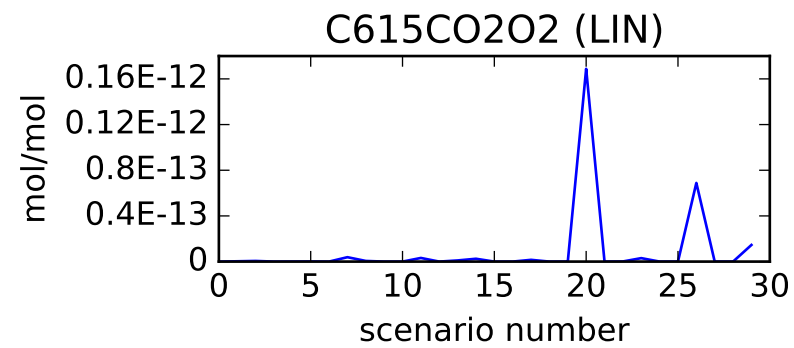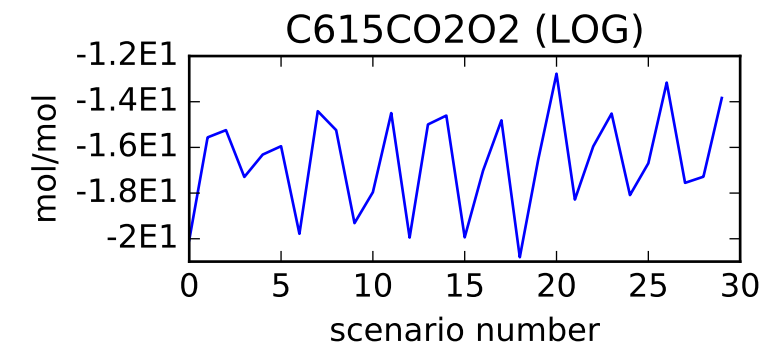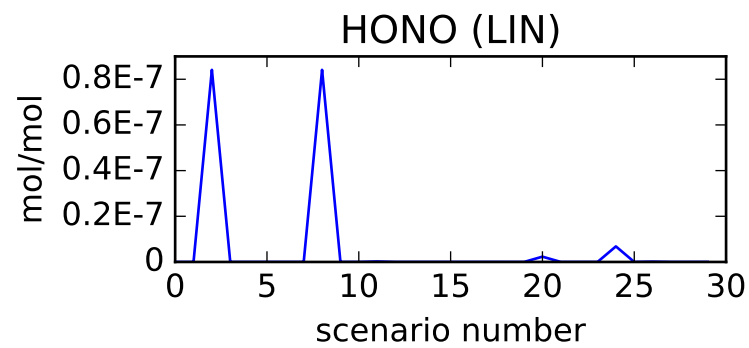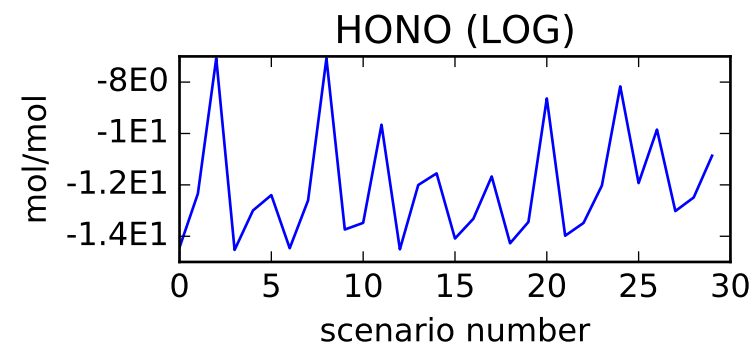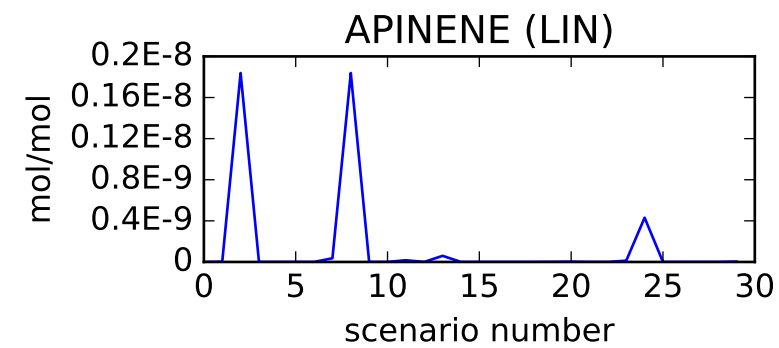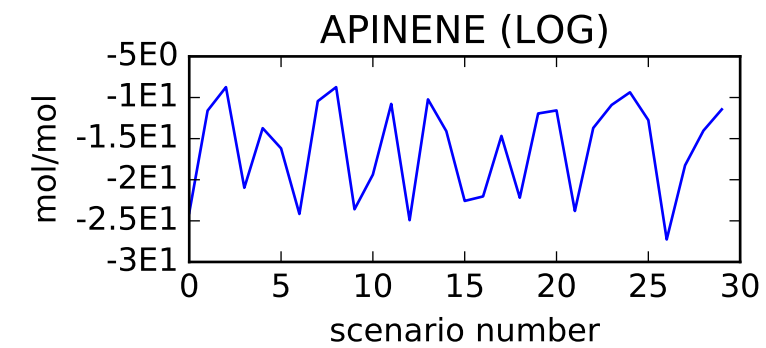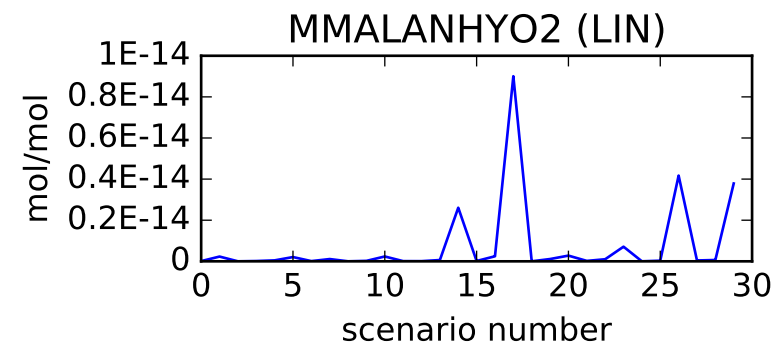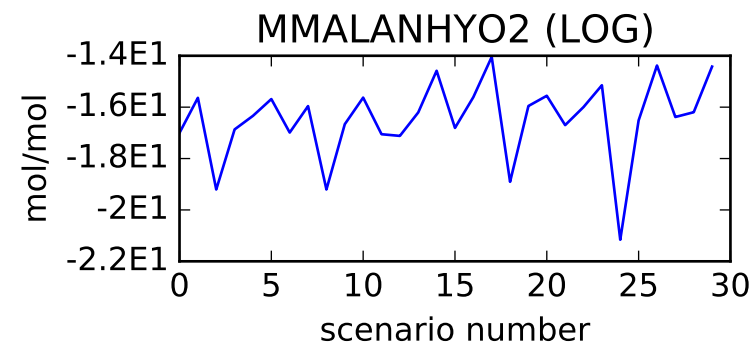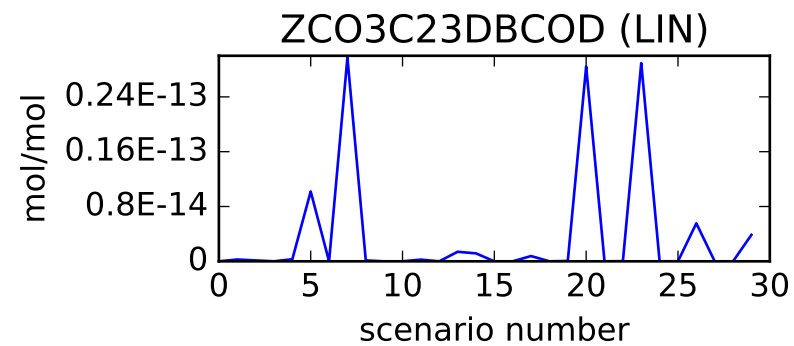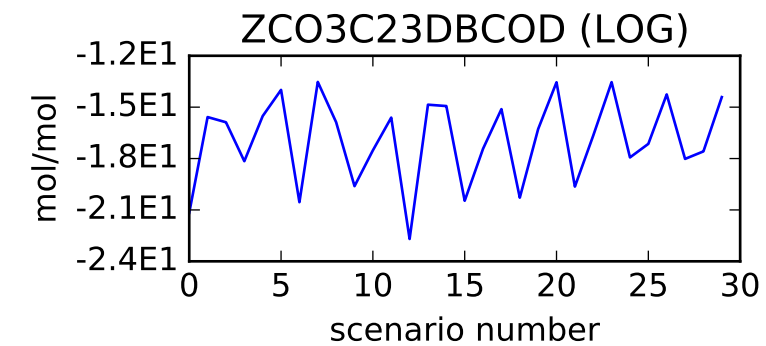



STYRENE (LIN)

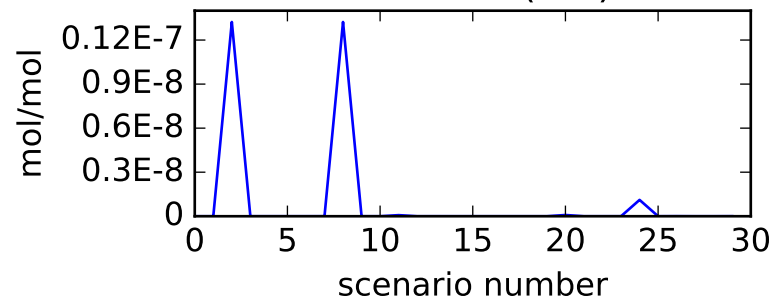

STYRENE (LOG)

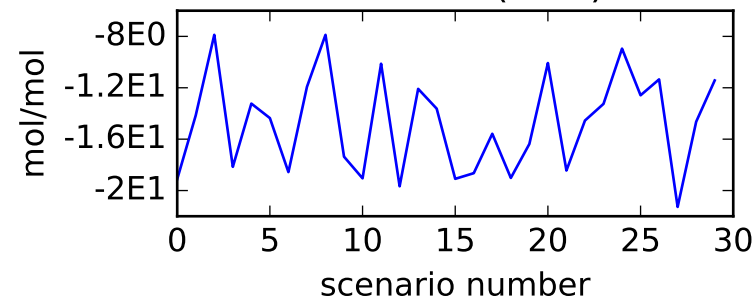

BZBIPERO2 (LIN)

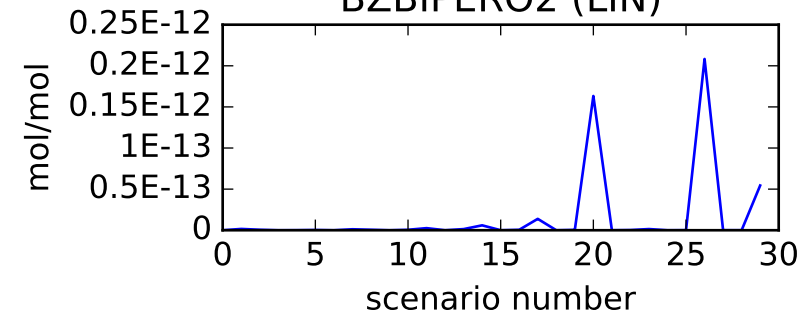

BZBIPERO2 (LOG)

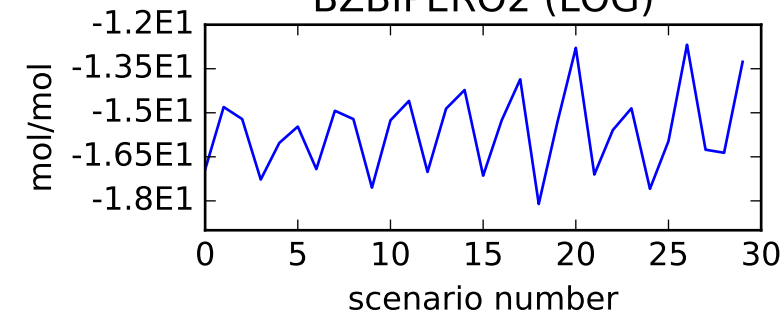

PHENOL (LIN)

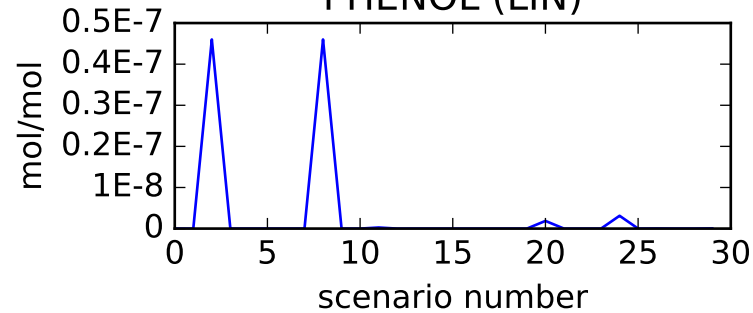

PHENOL (LOG)

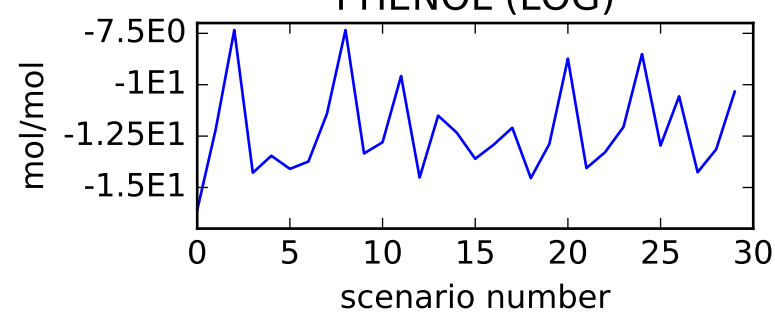

MALDALCO2H (LIN)

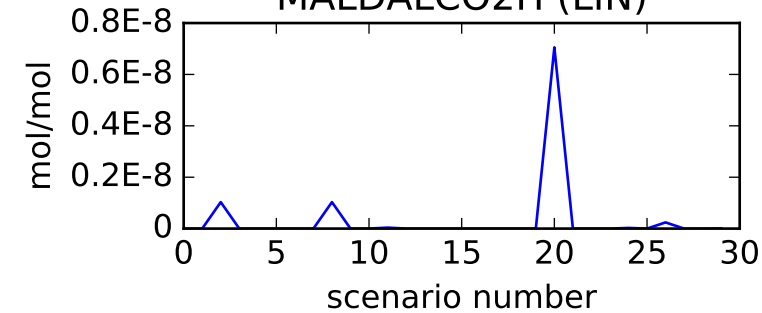

MALDALCO2H (LOG)

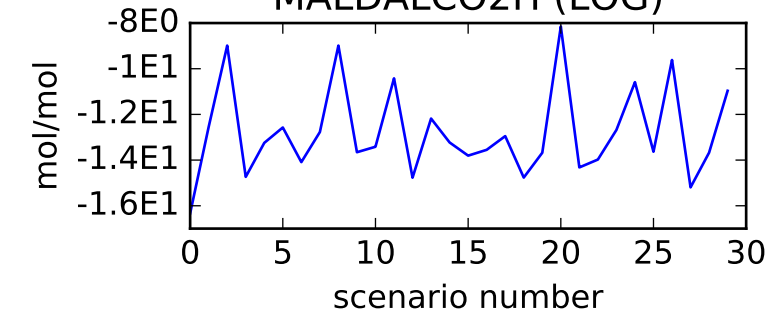

CATEC1O (LIN)

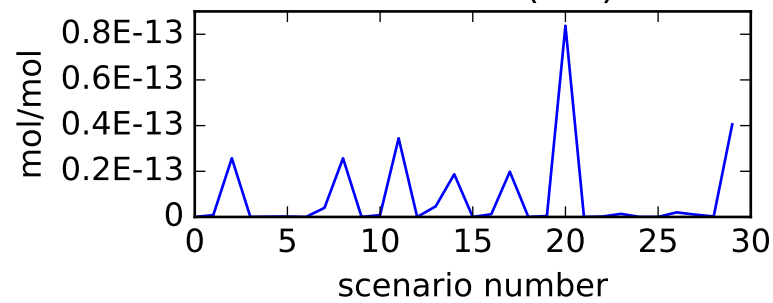

CATEC1O (LOG)

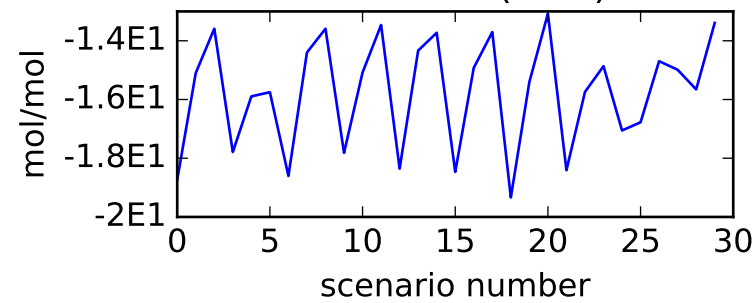

C5134CO2OH (LIN)

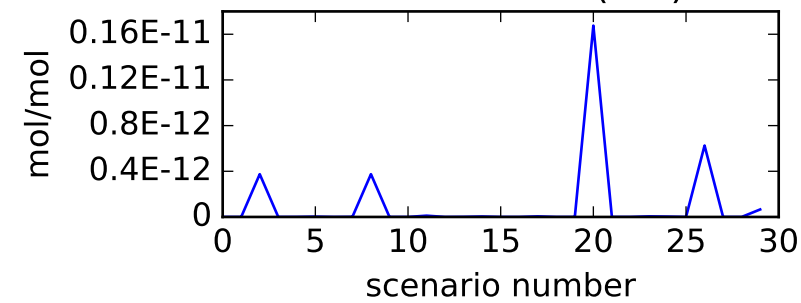

C5134CO2OH (LOG)

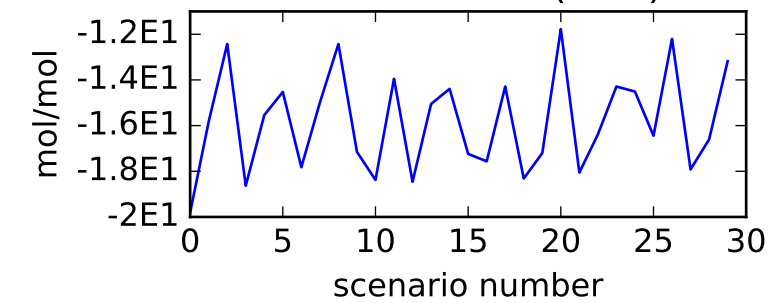

CARENE (LIN)

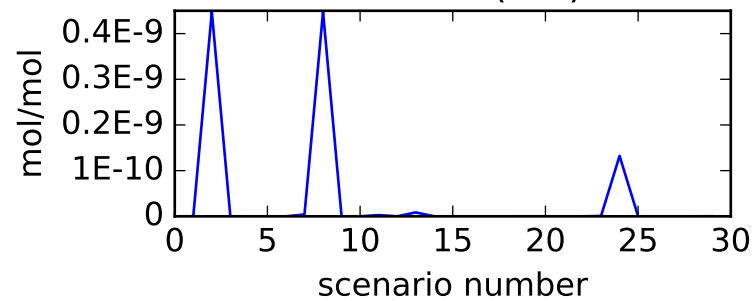

CARENE (LOG)

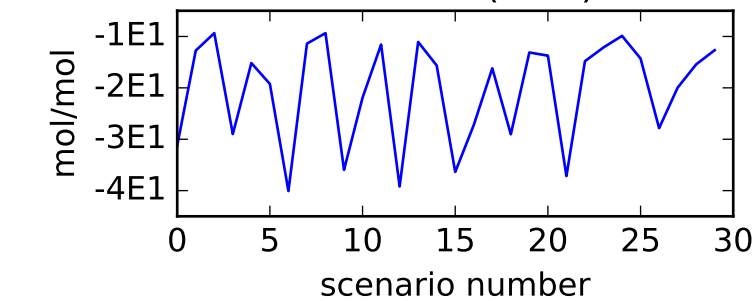

CH3COCO3 (LIN)

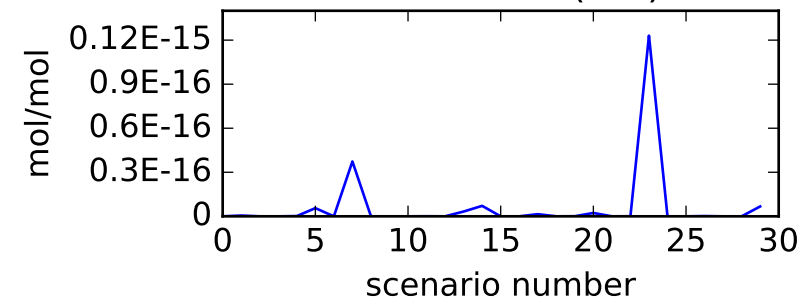

CH3COCO3 (LOG)

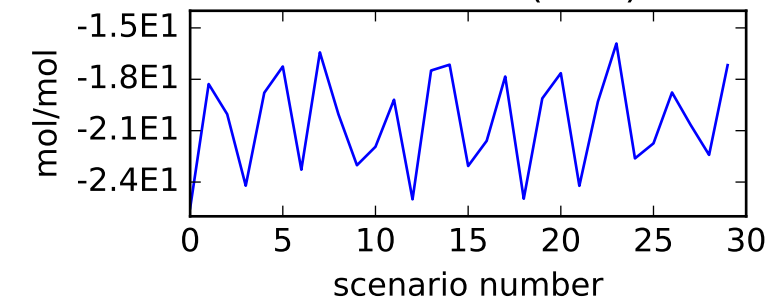

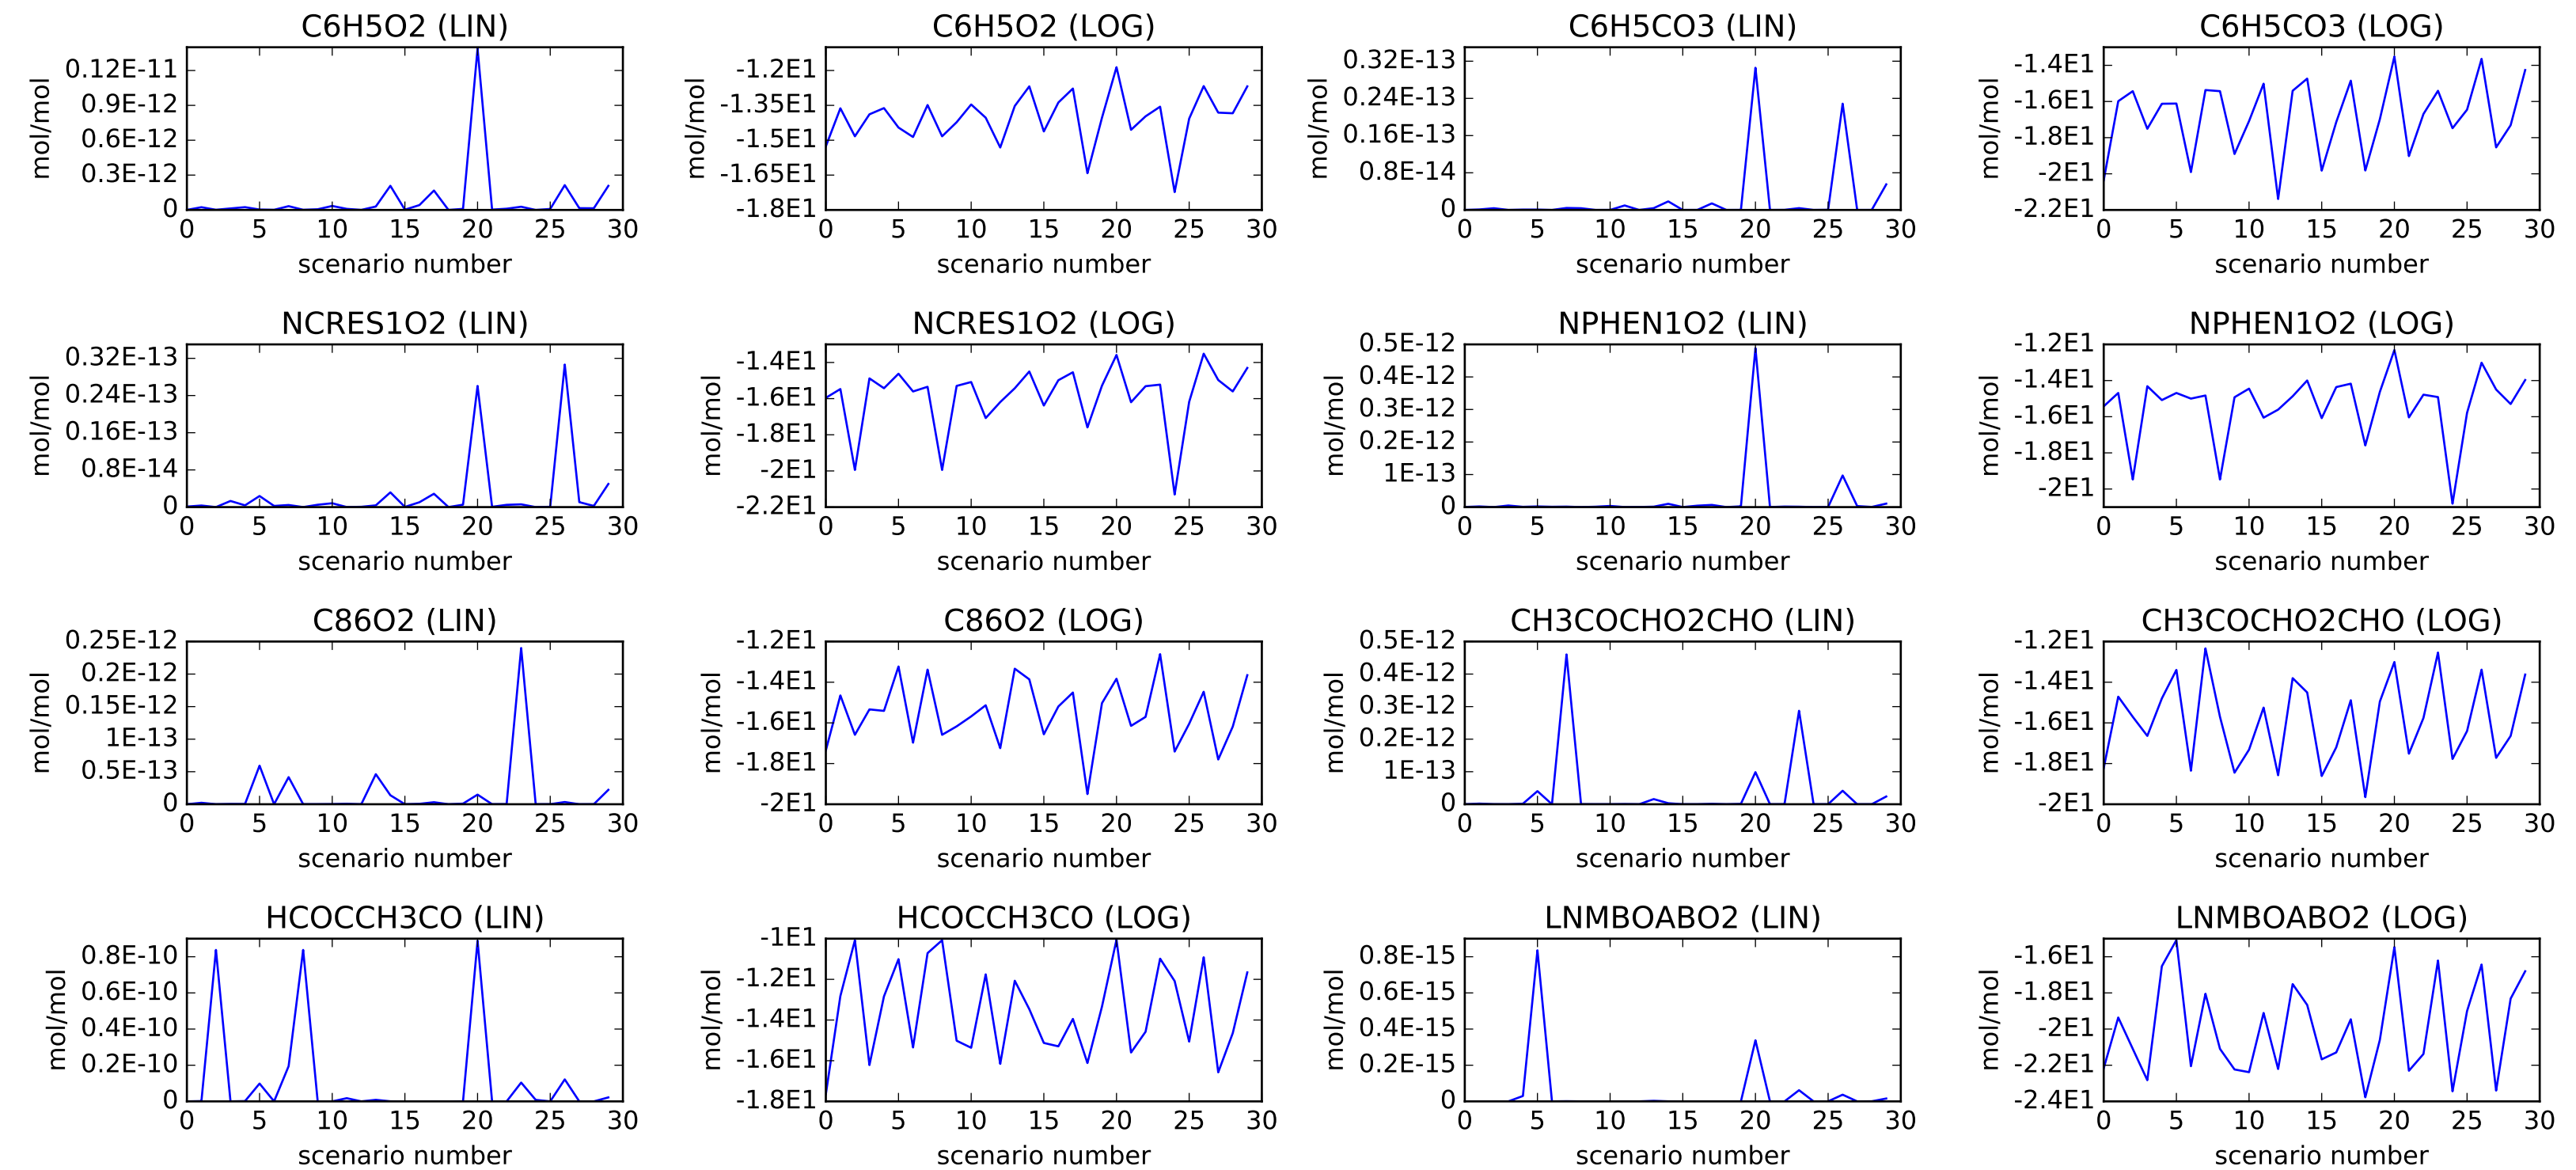

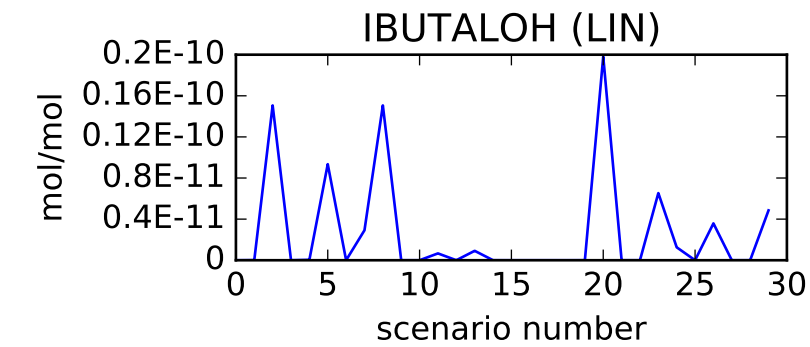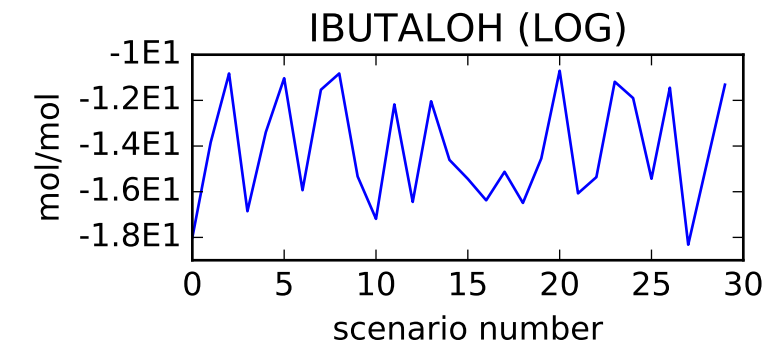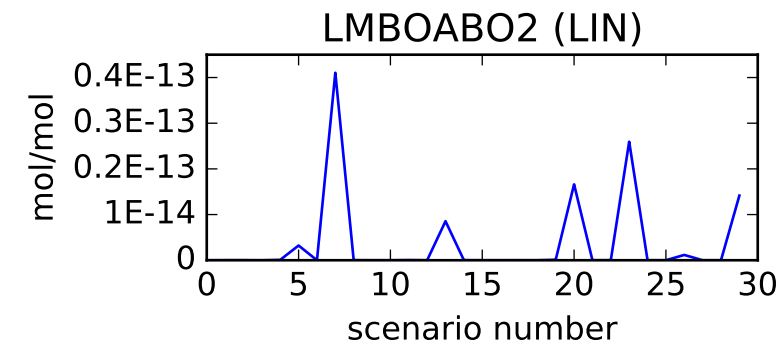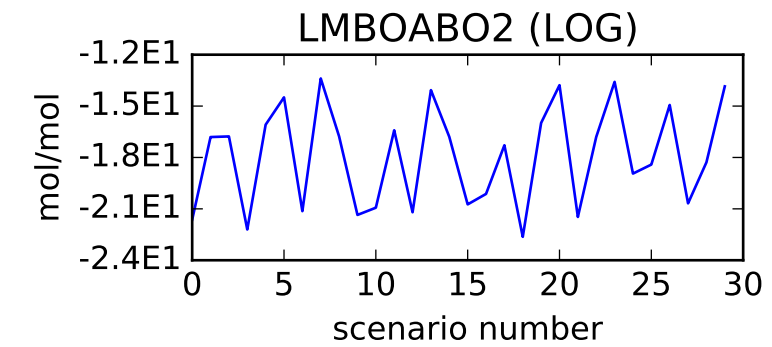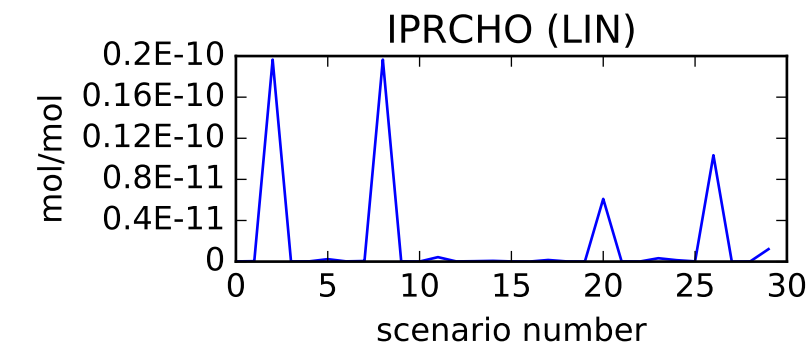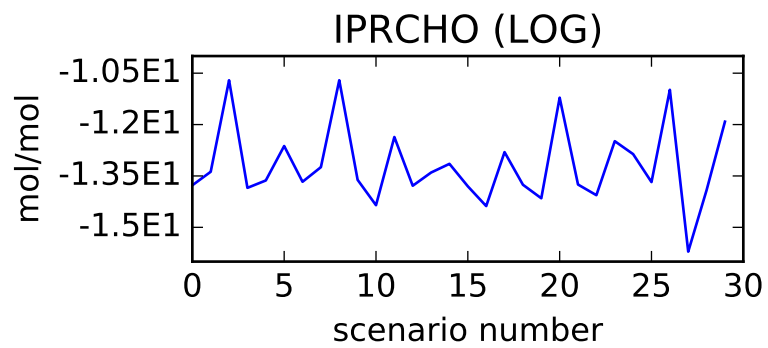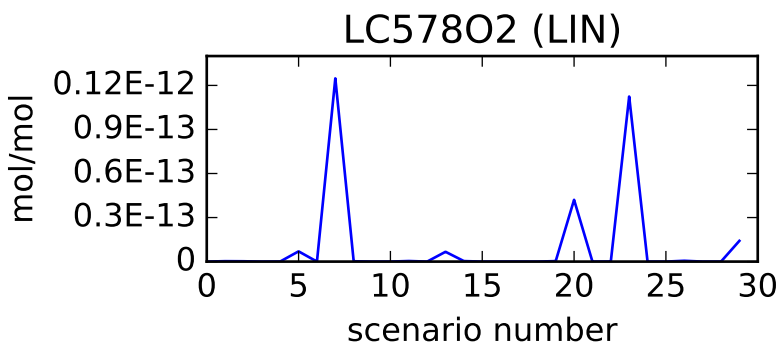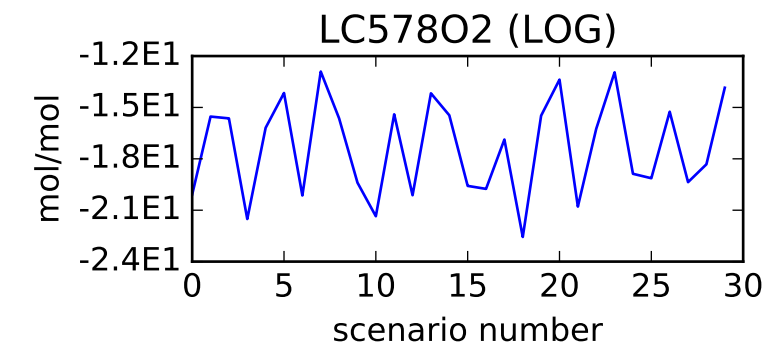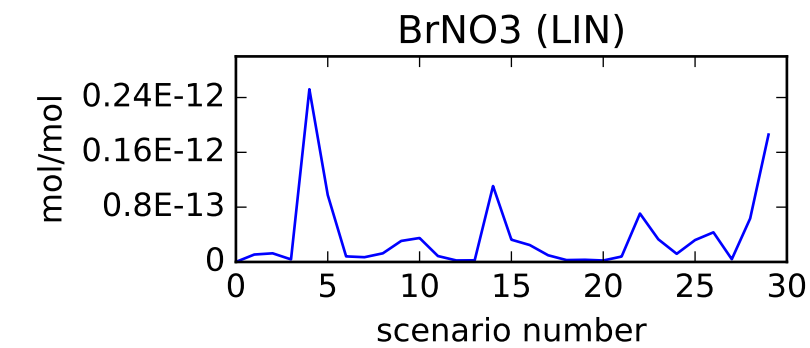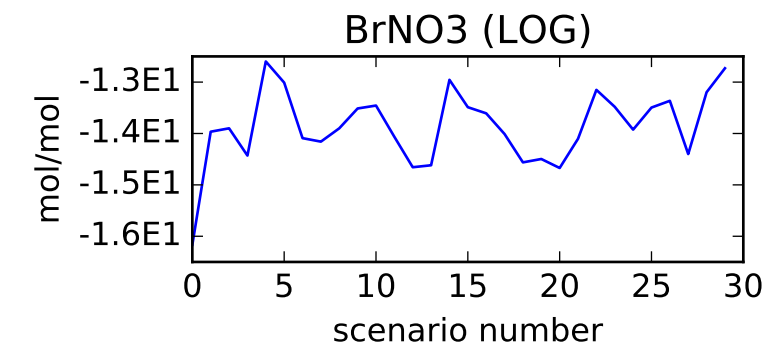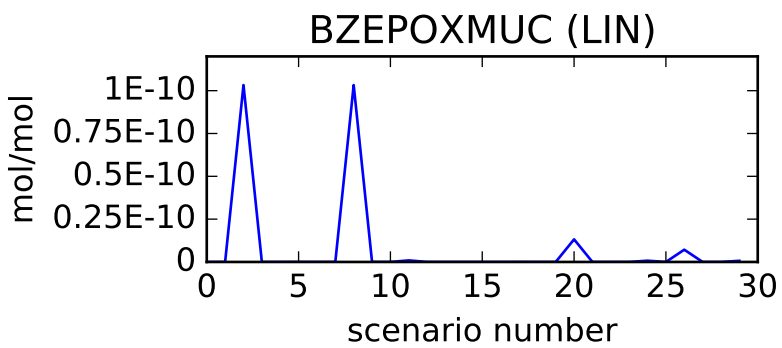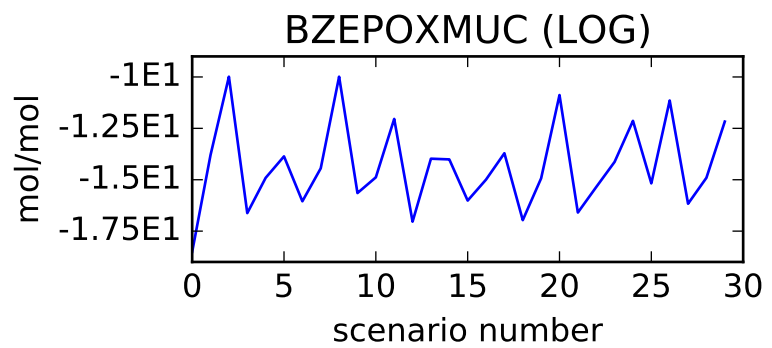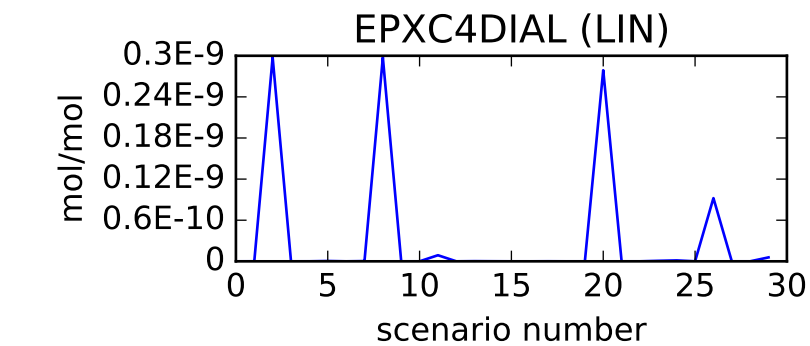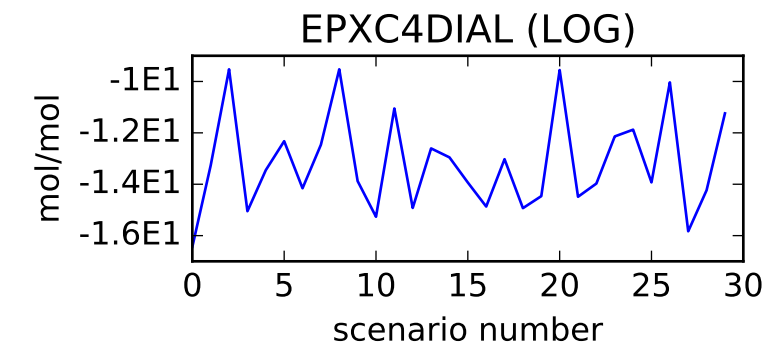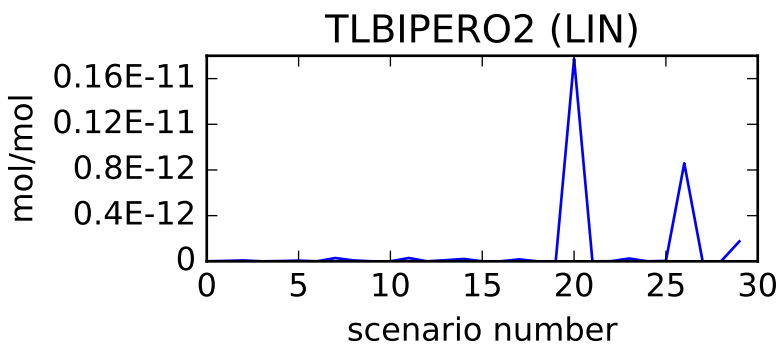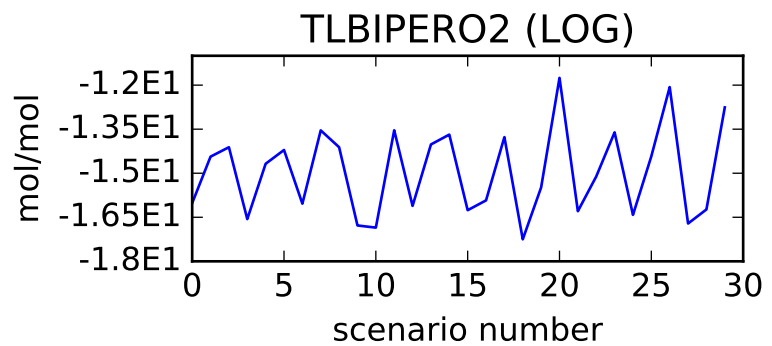

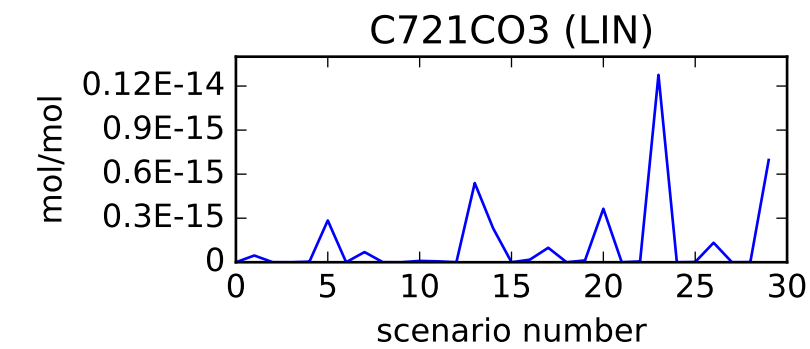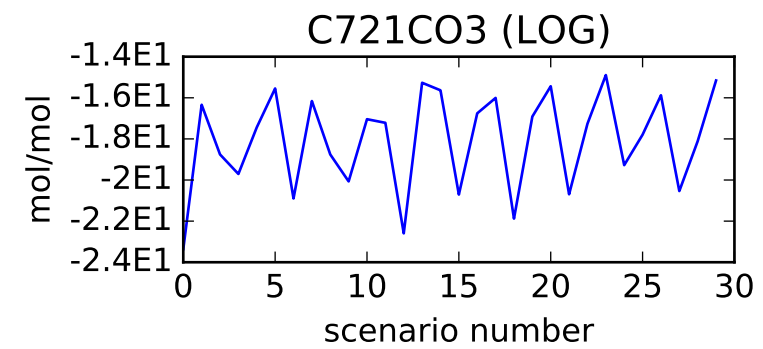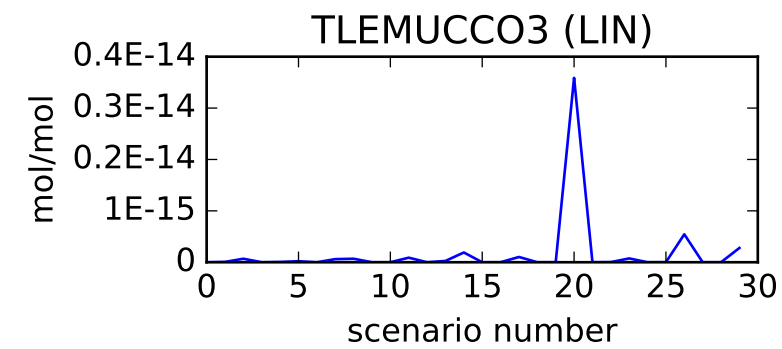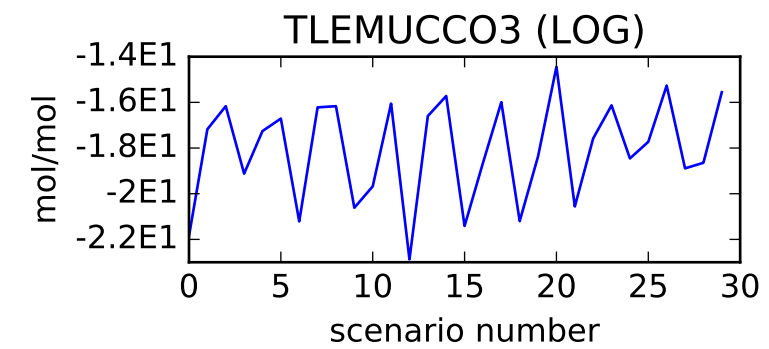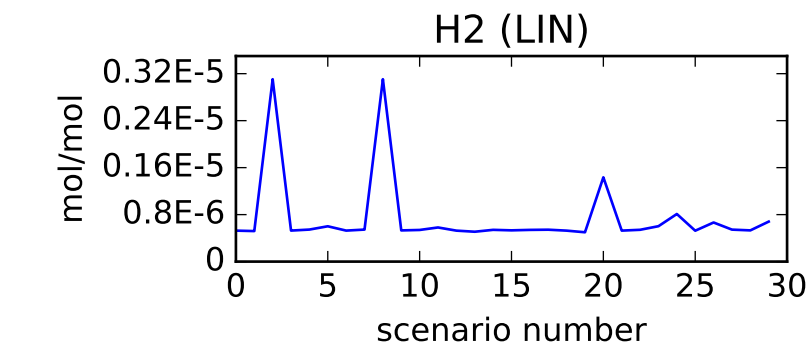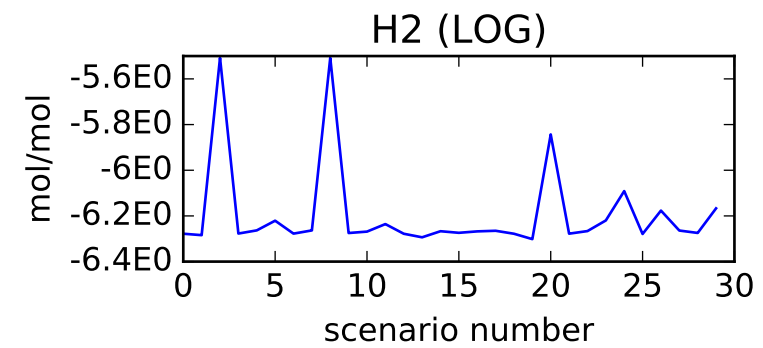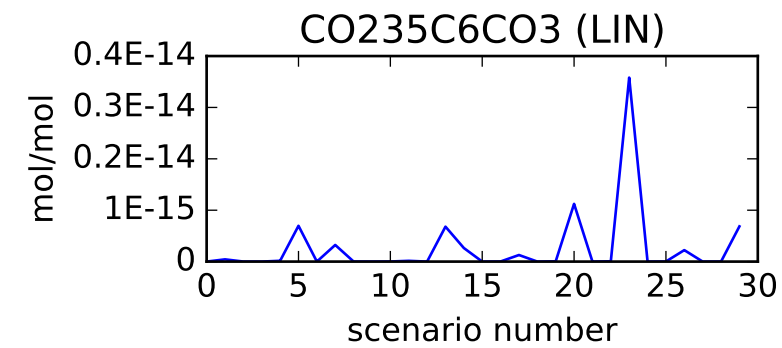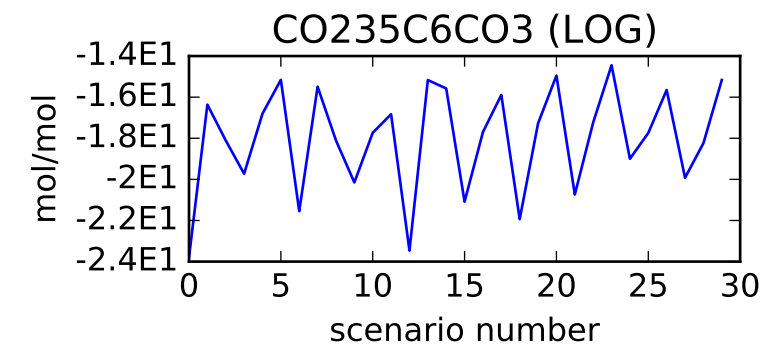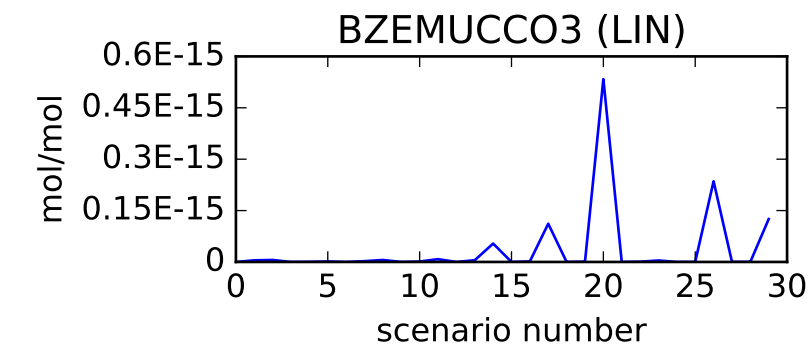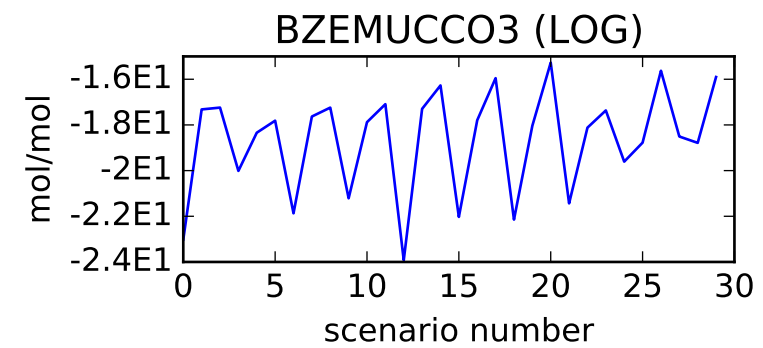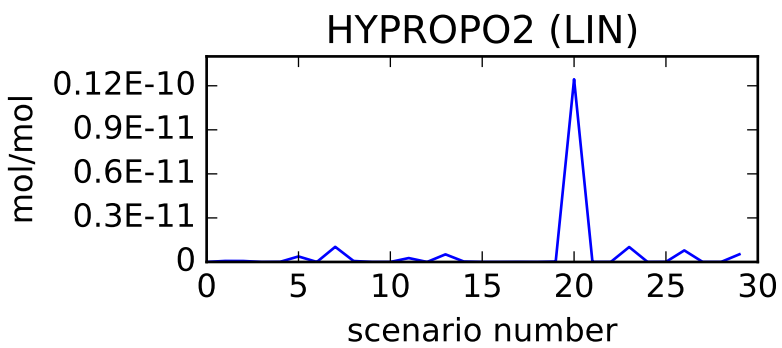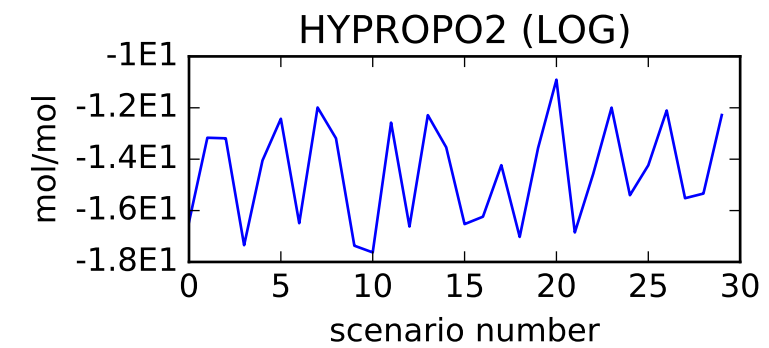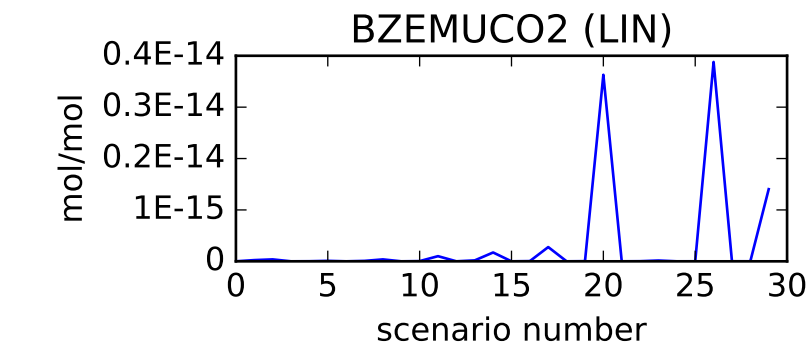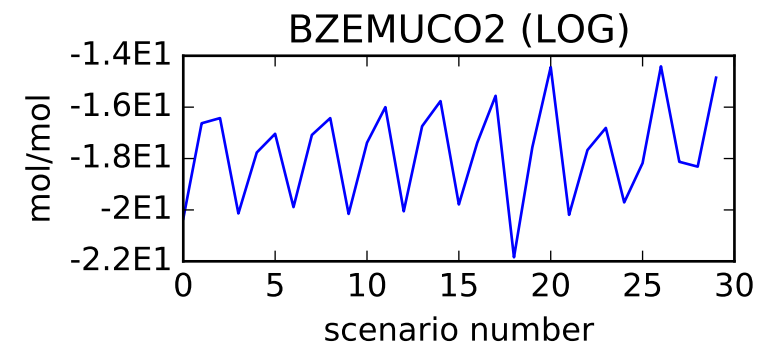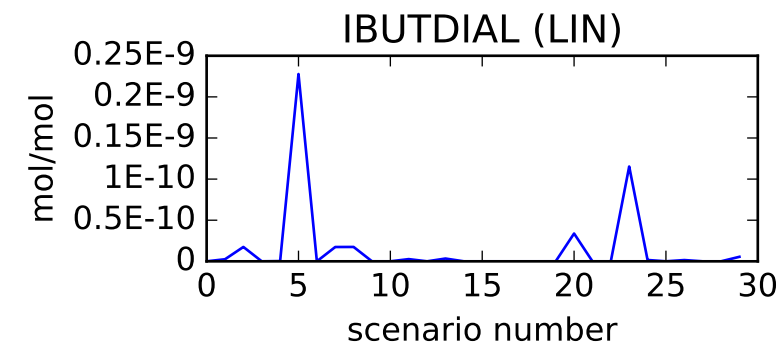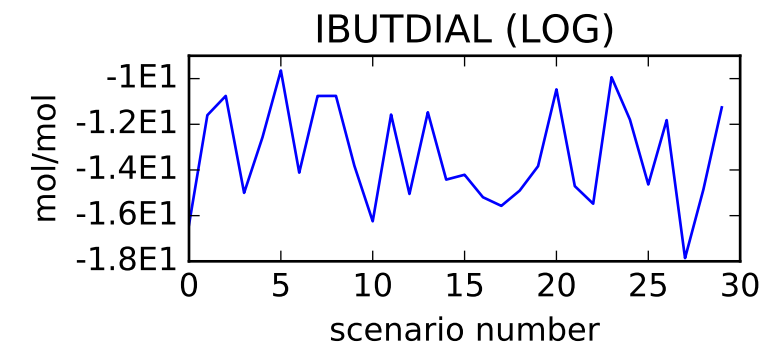

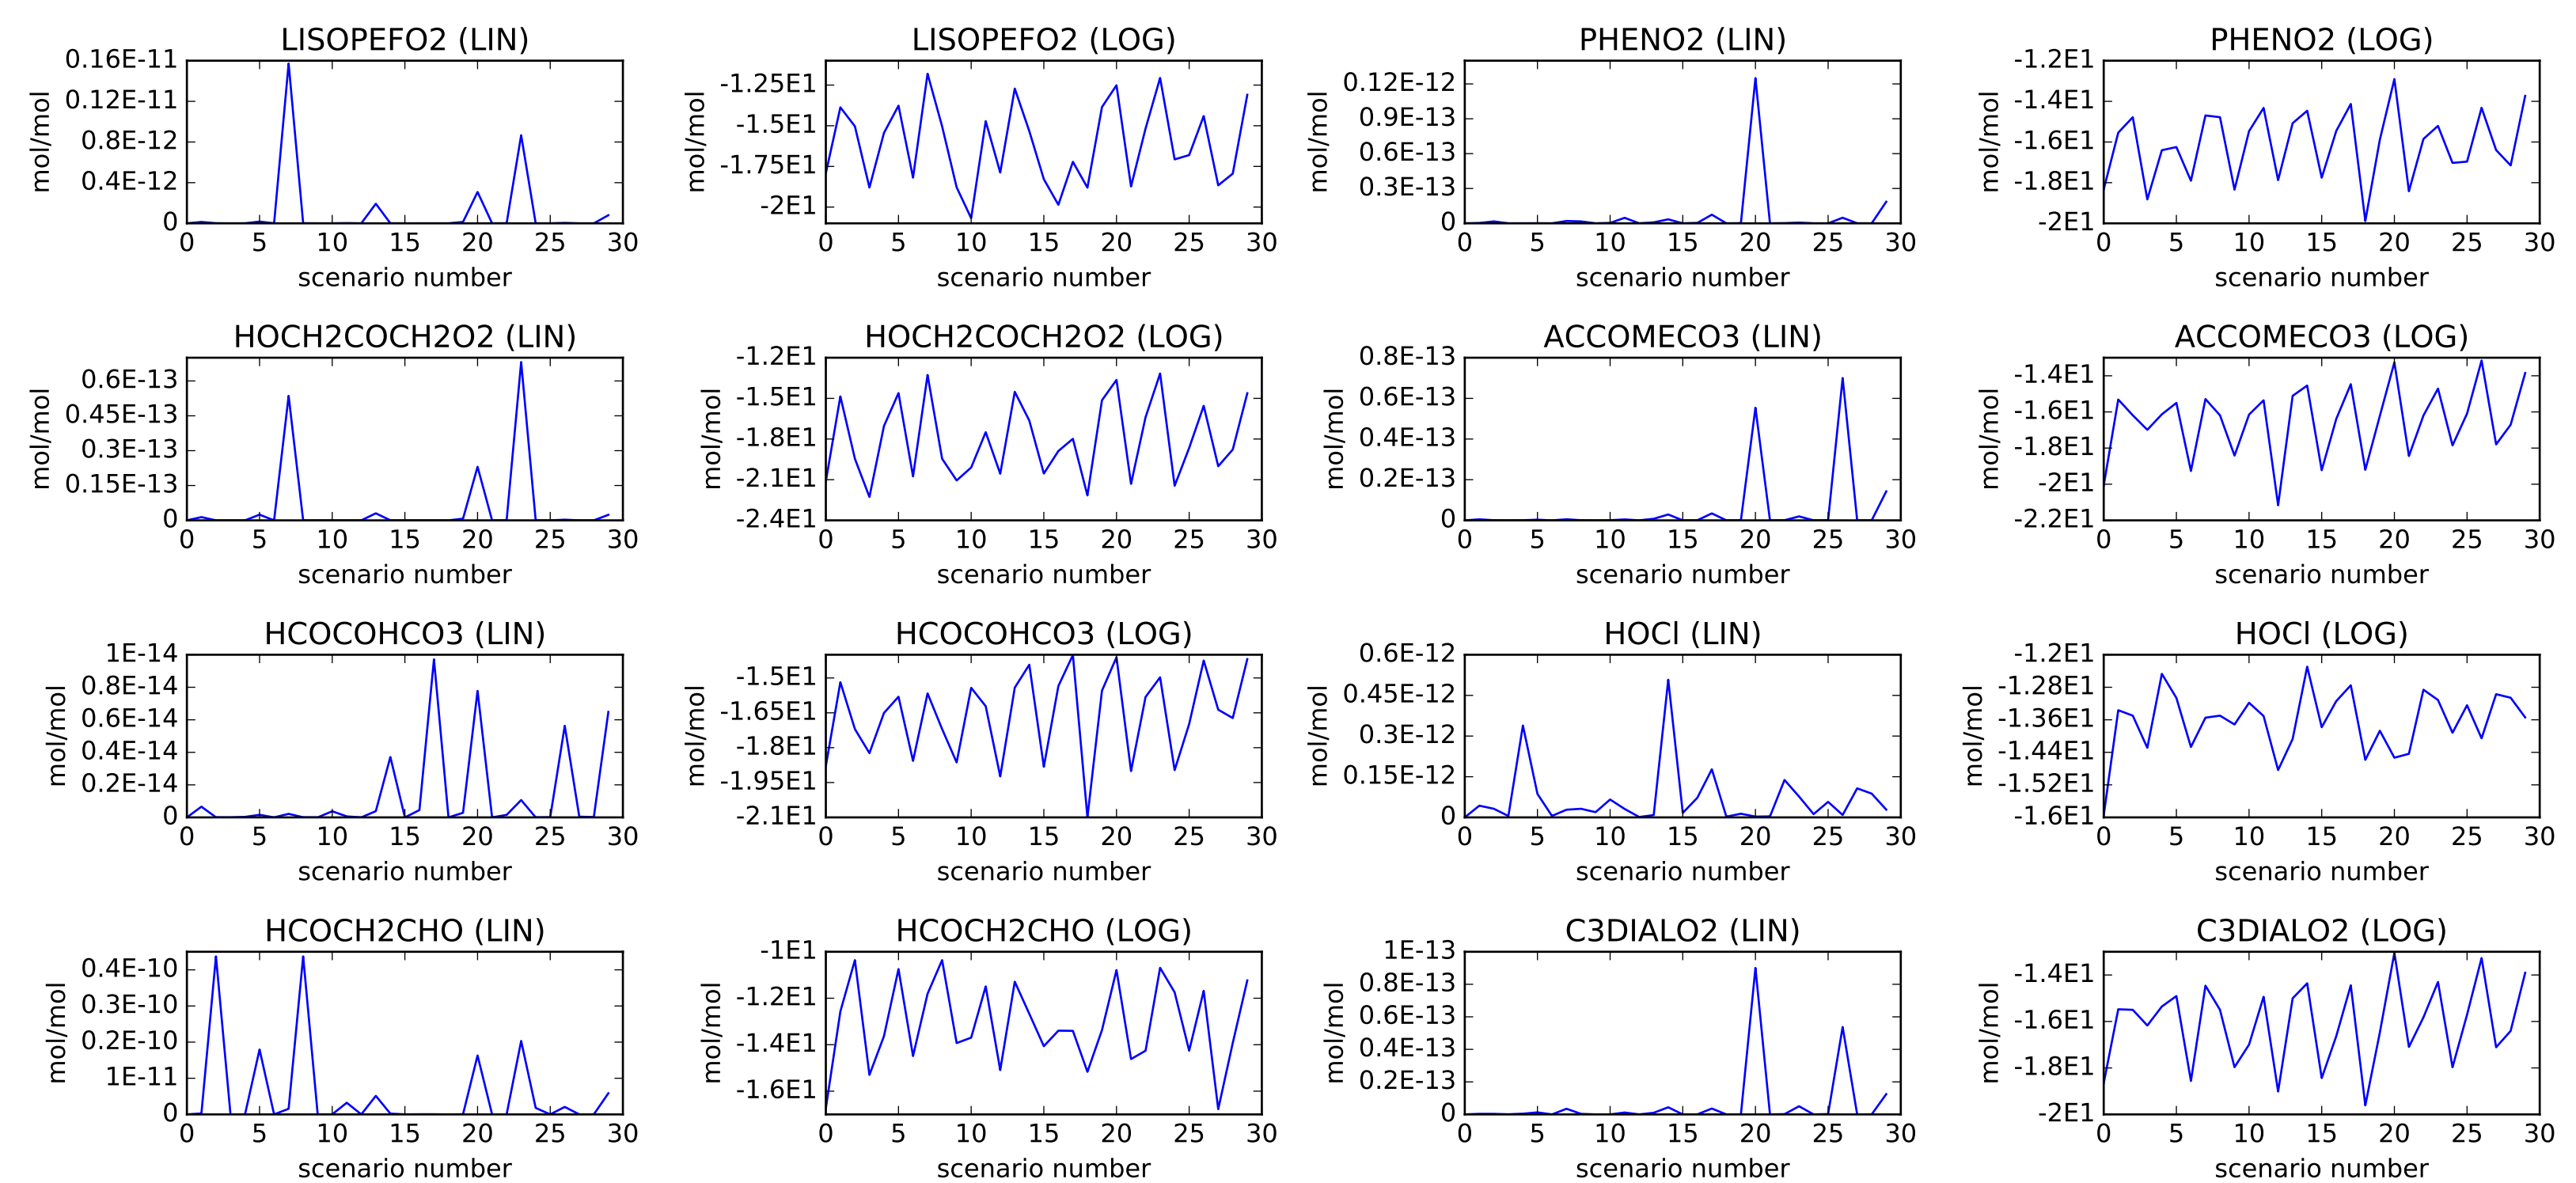

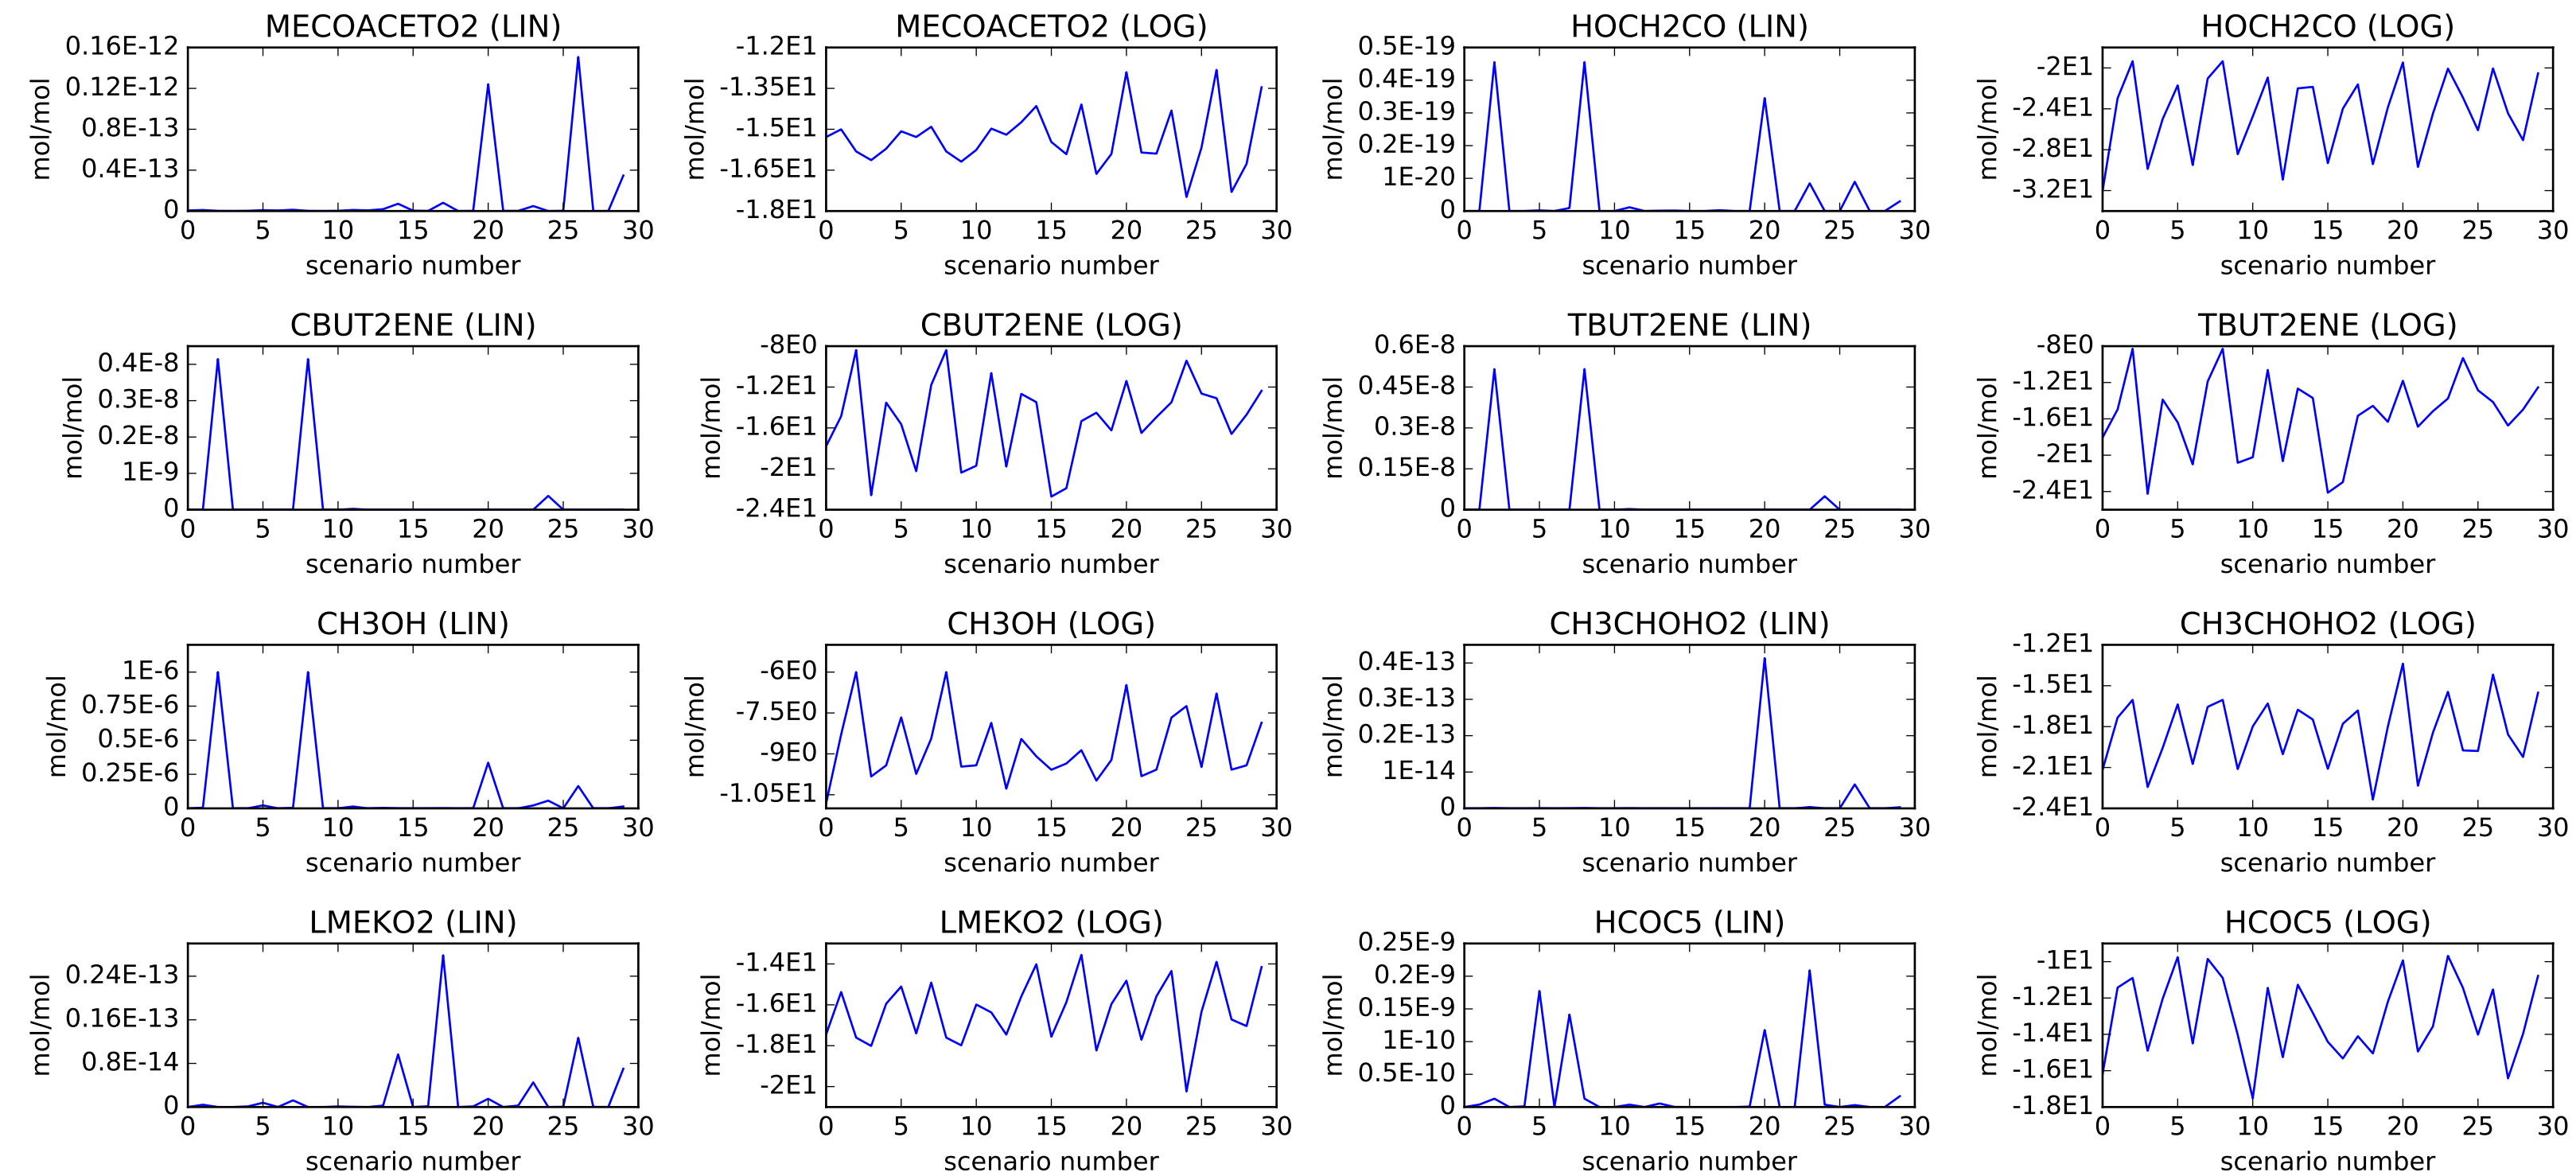



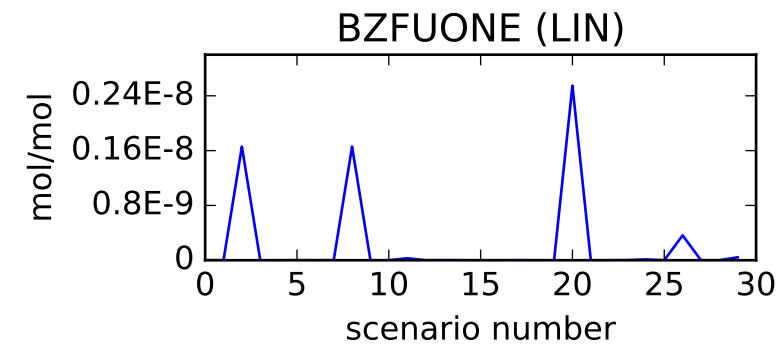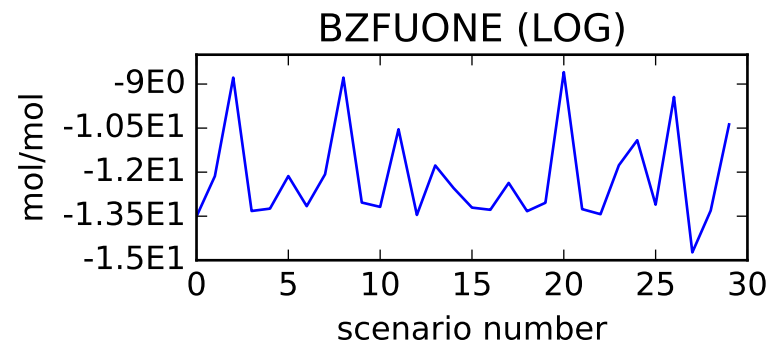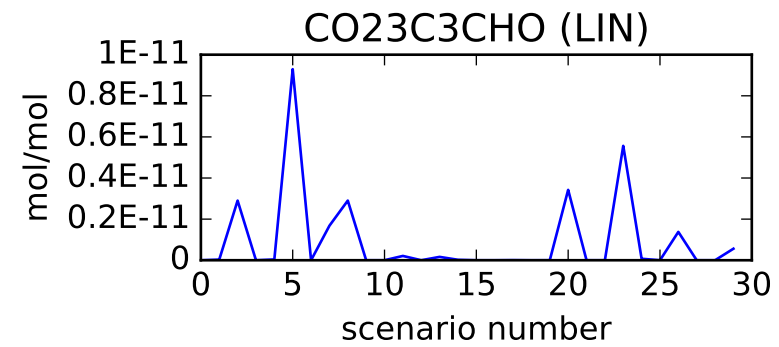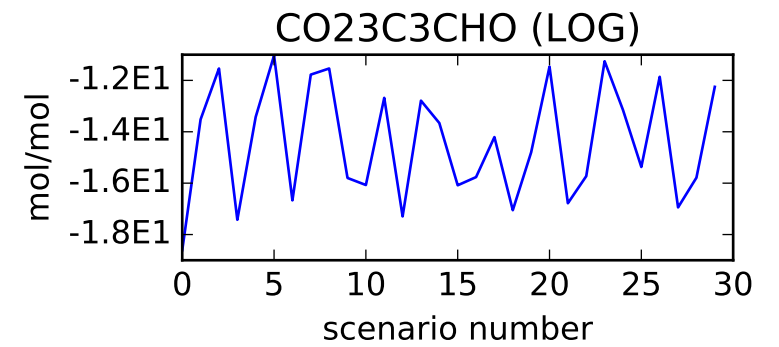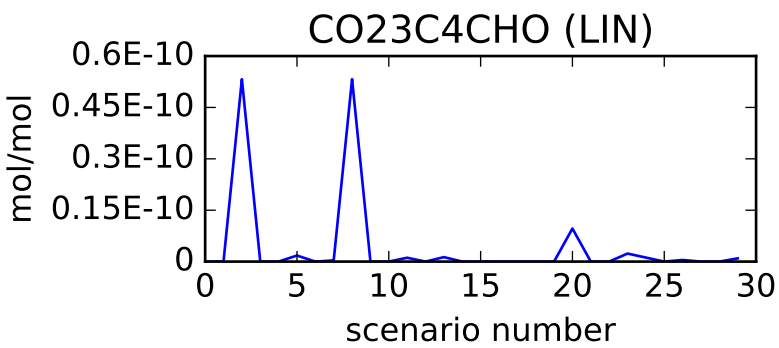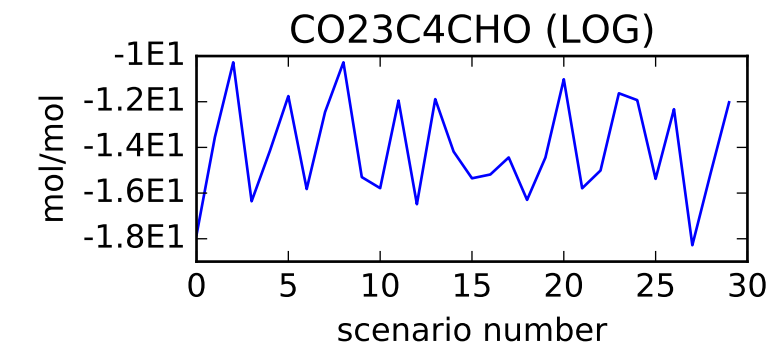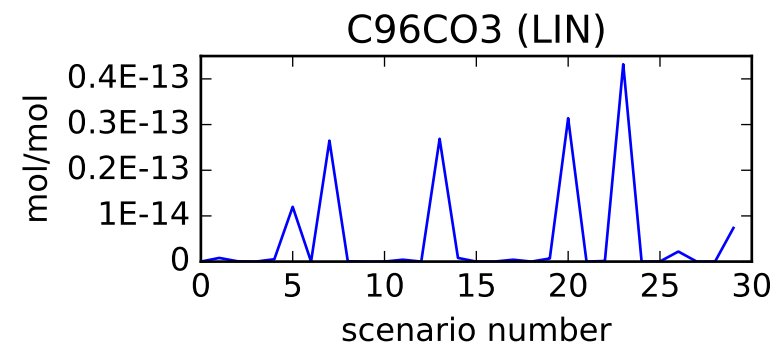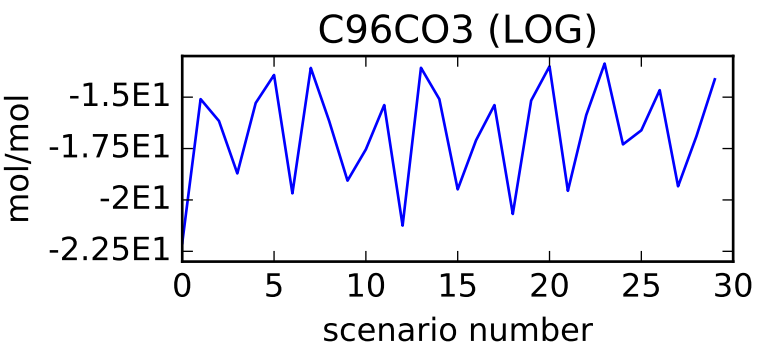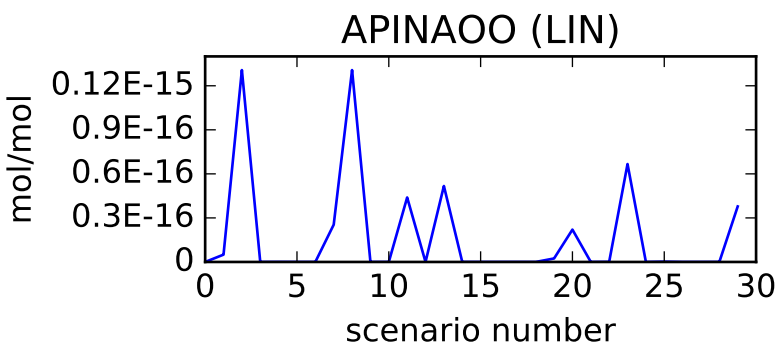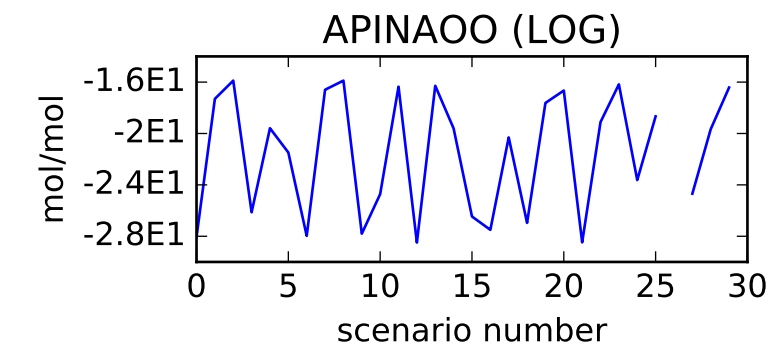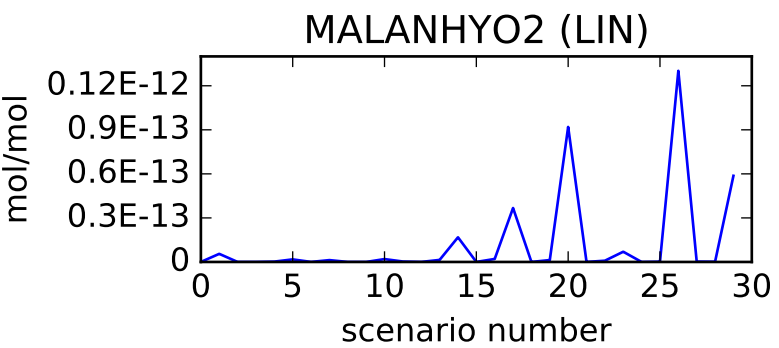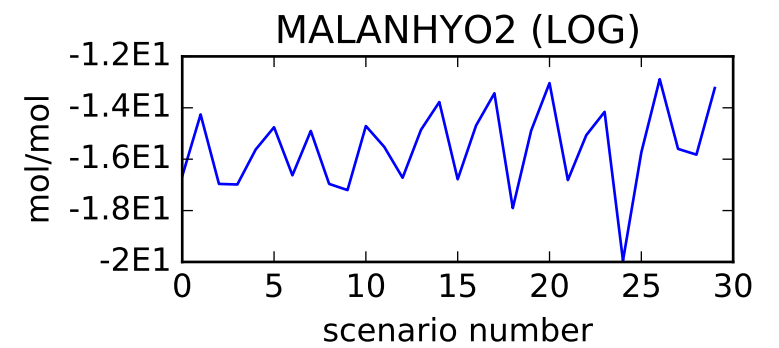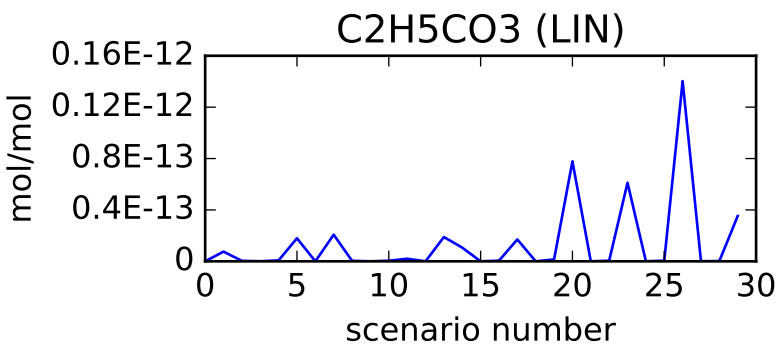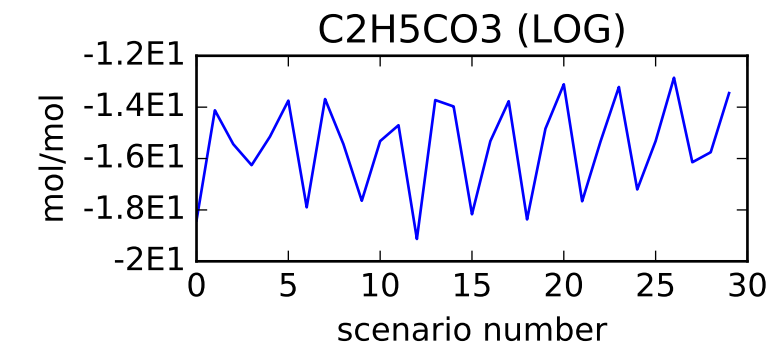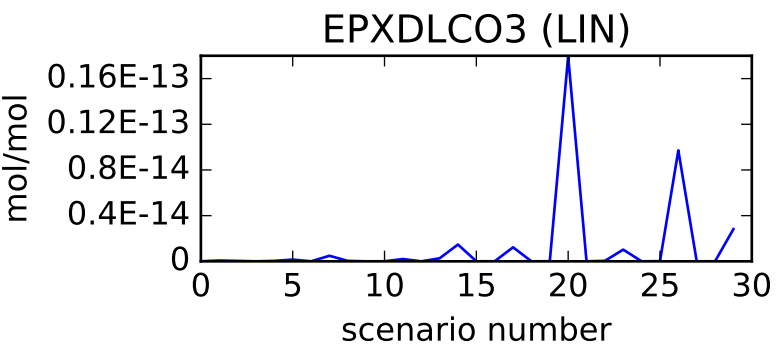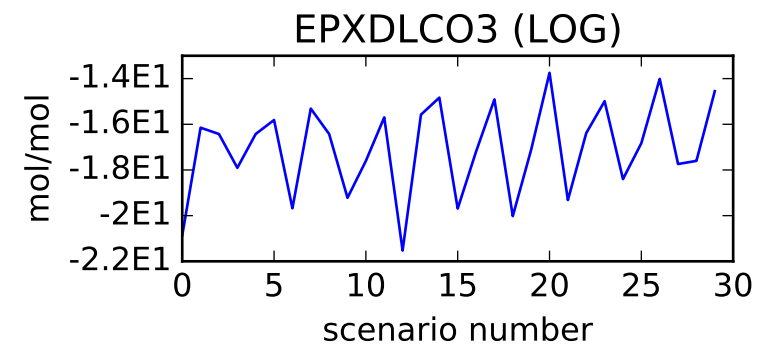

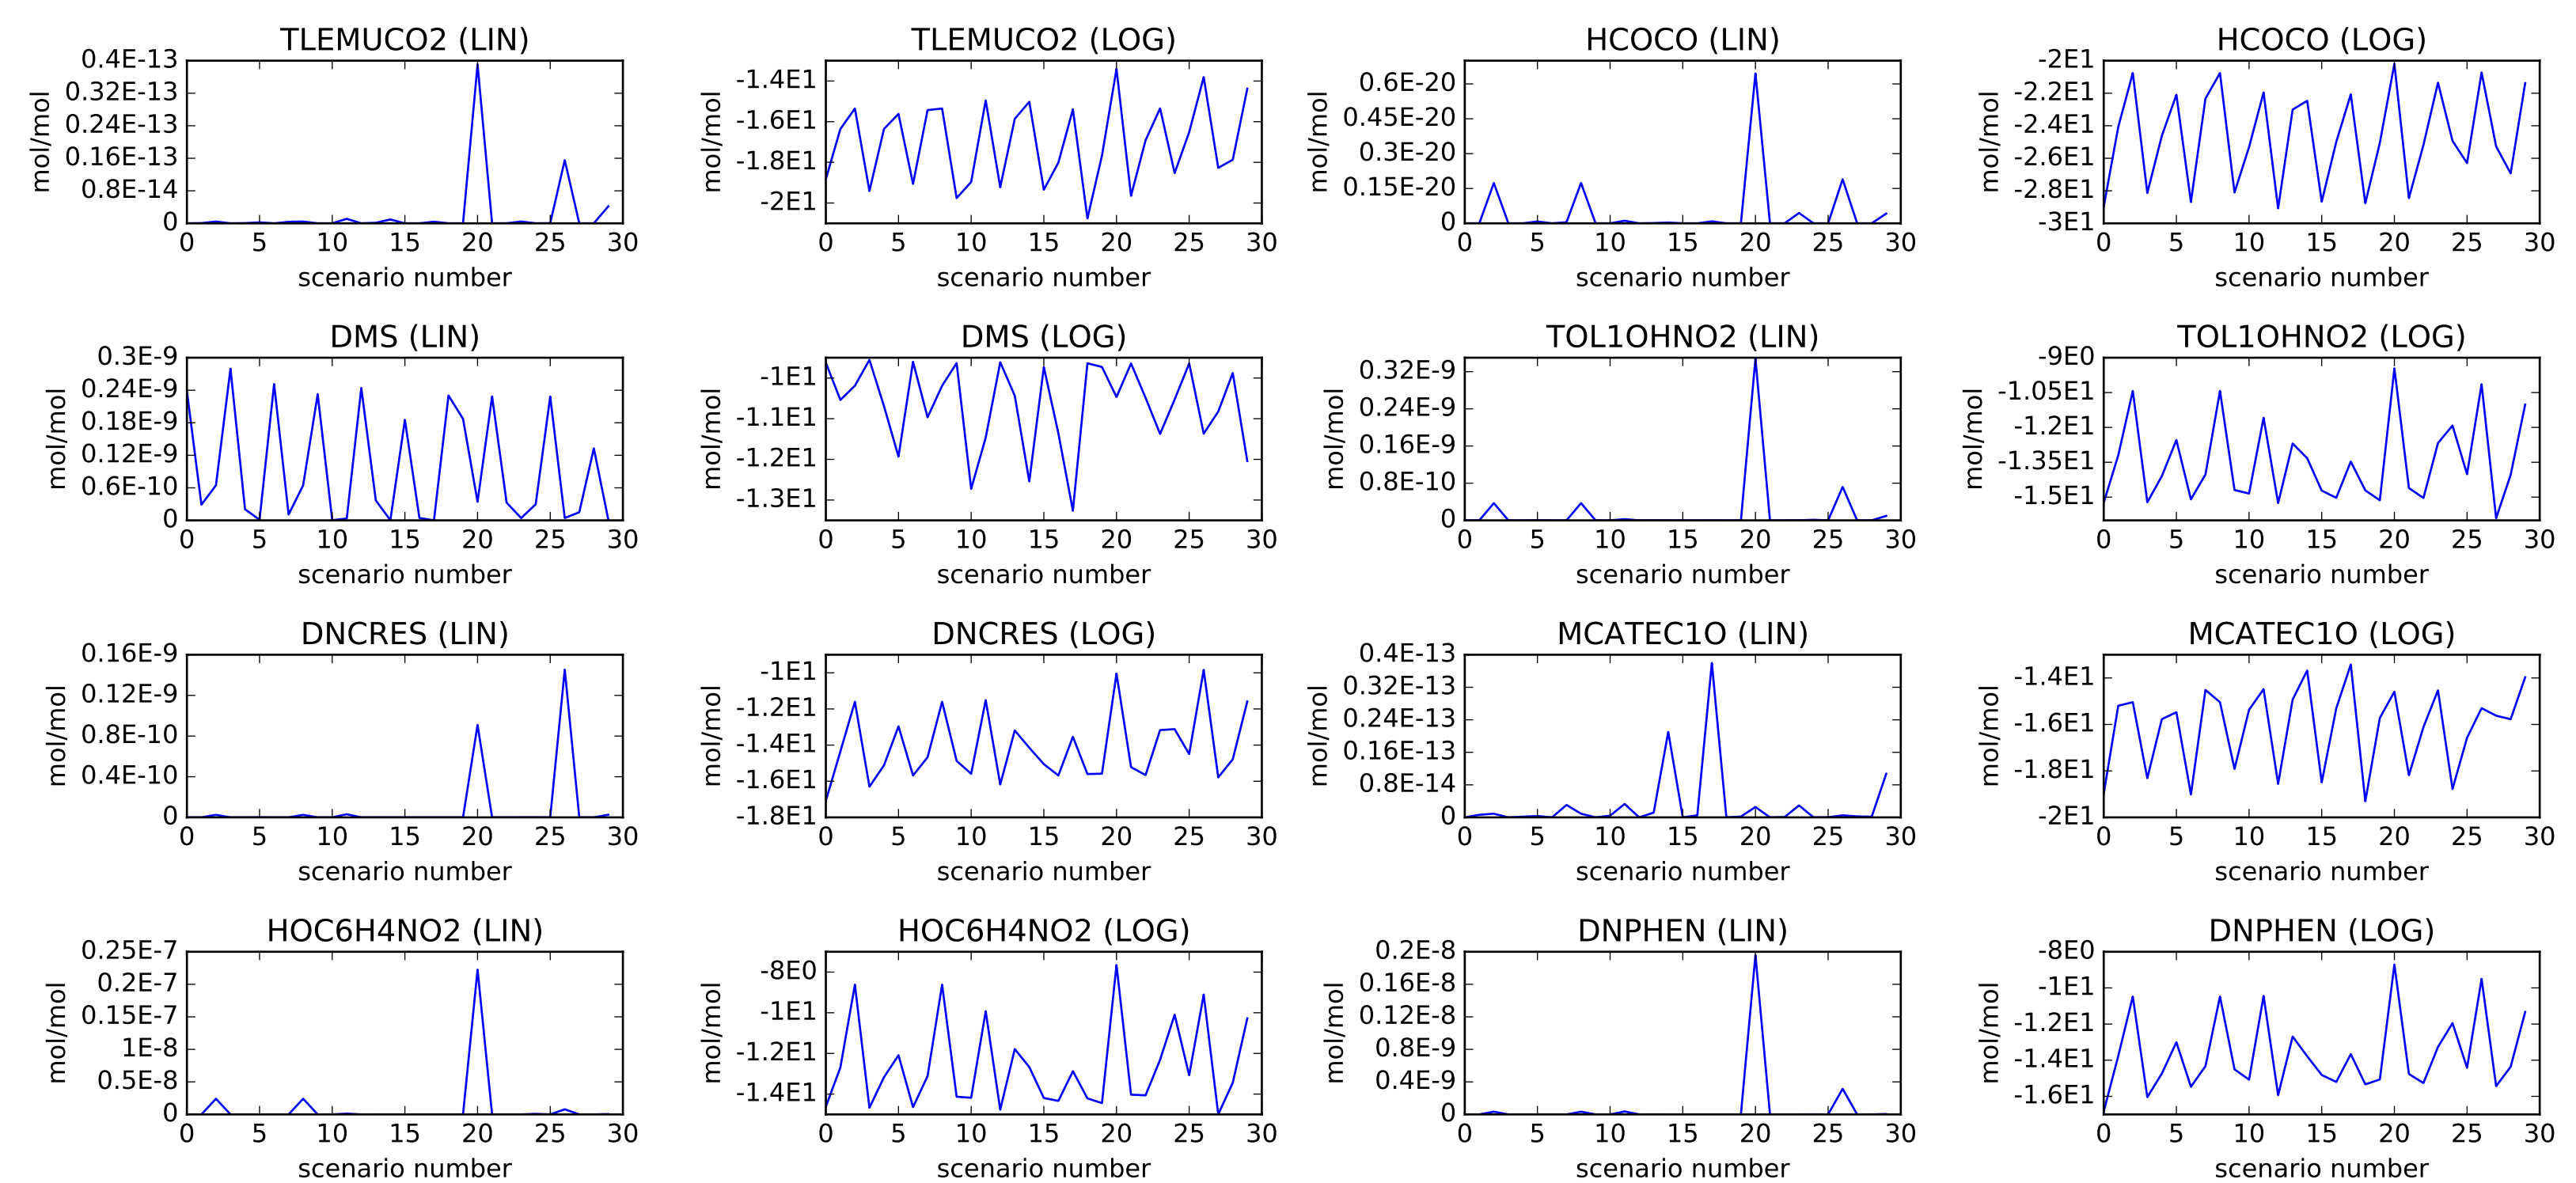

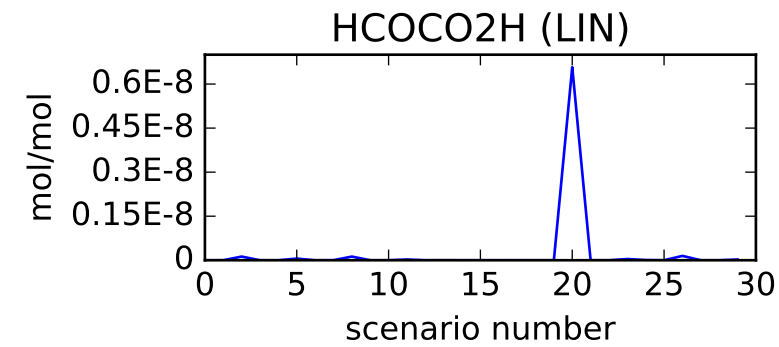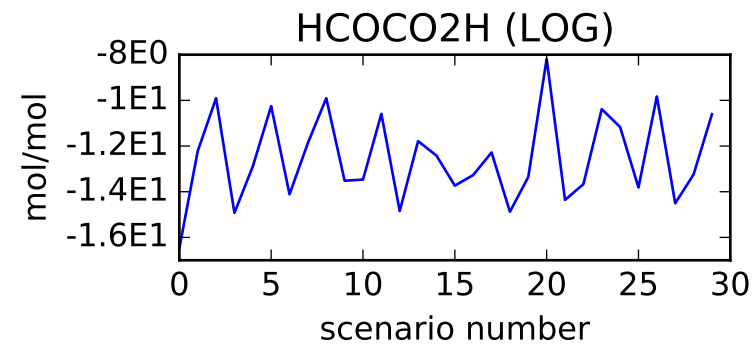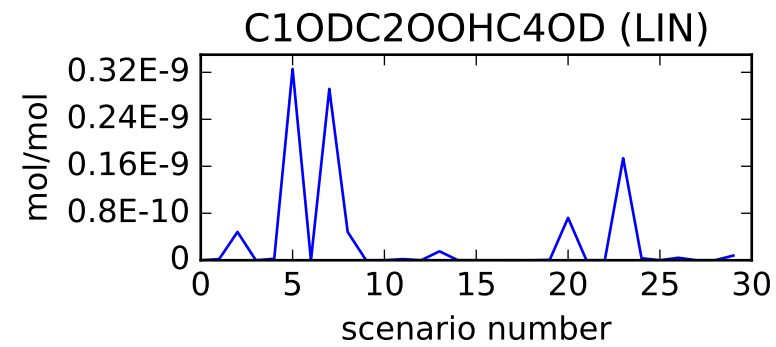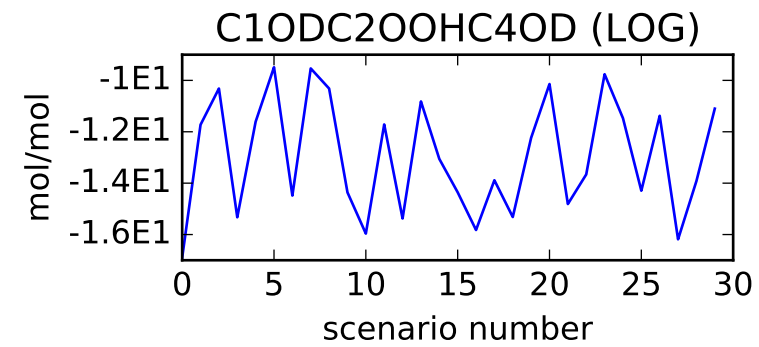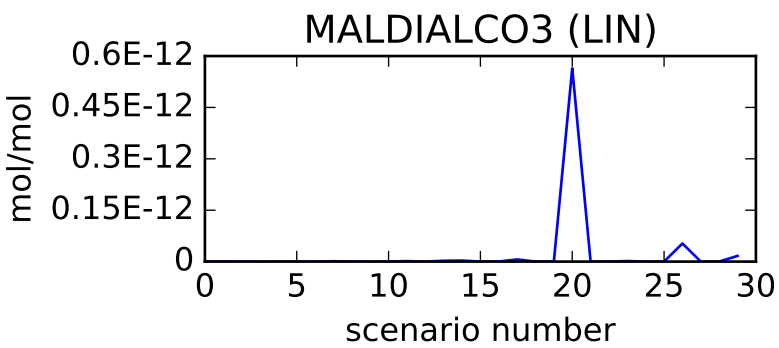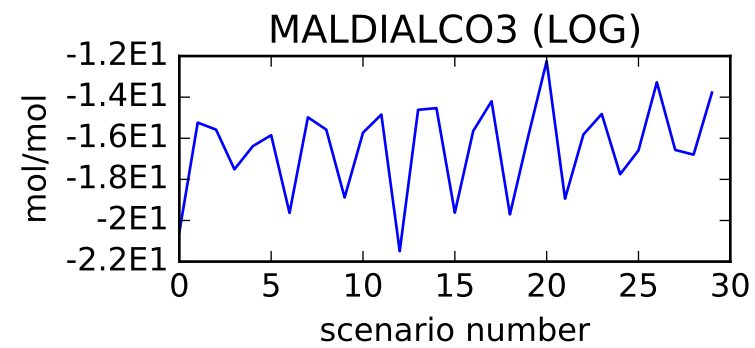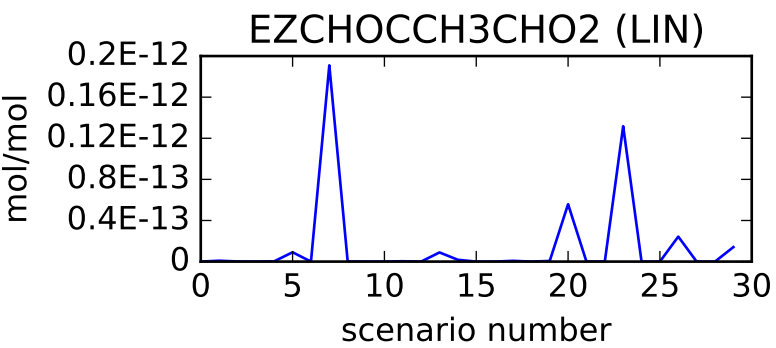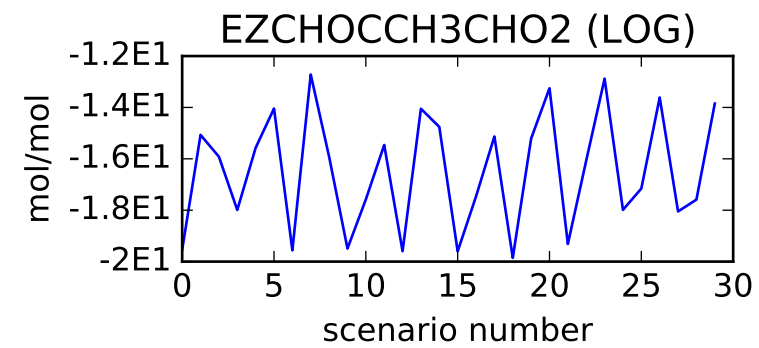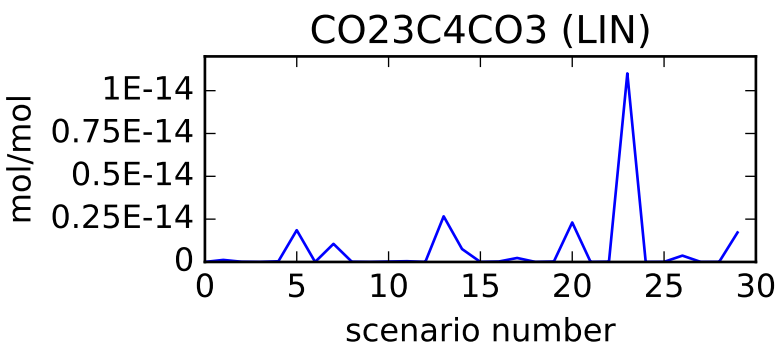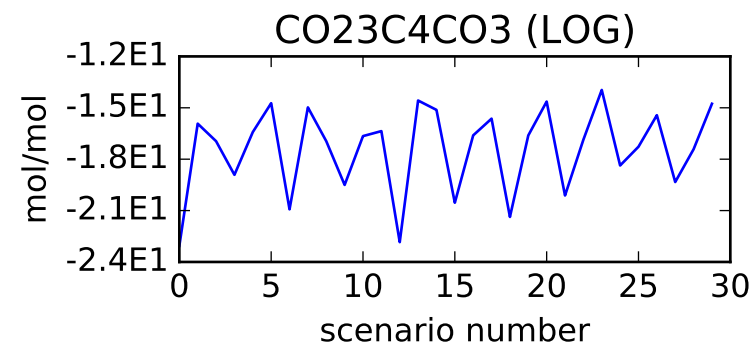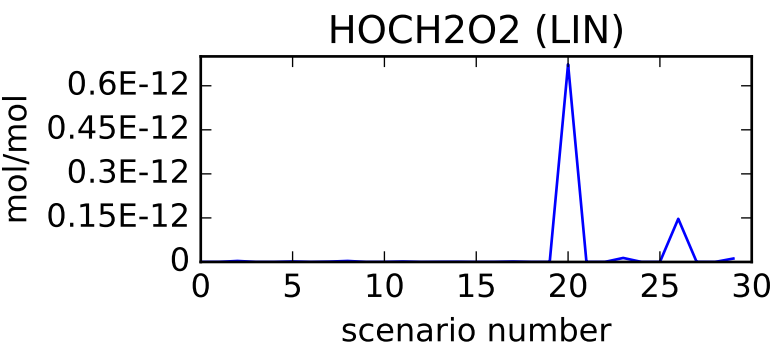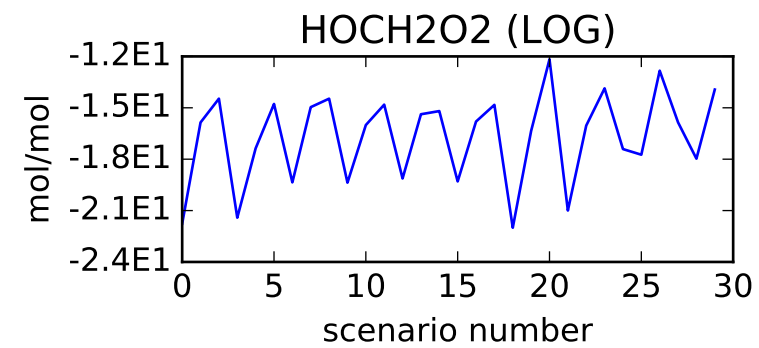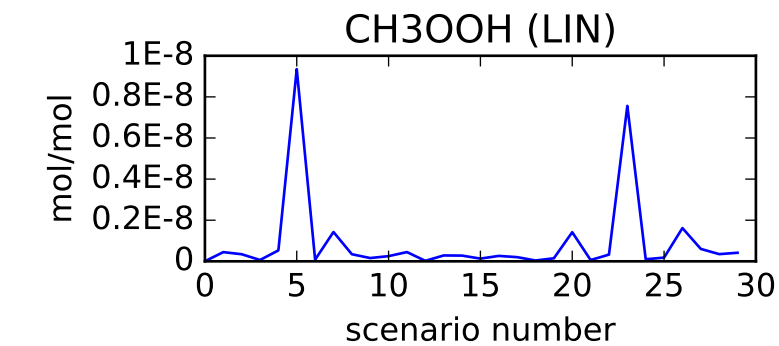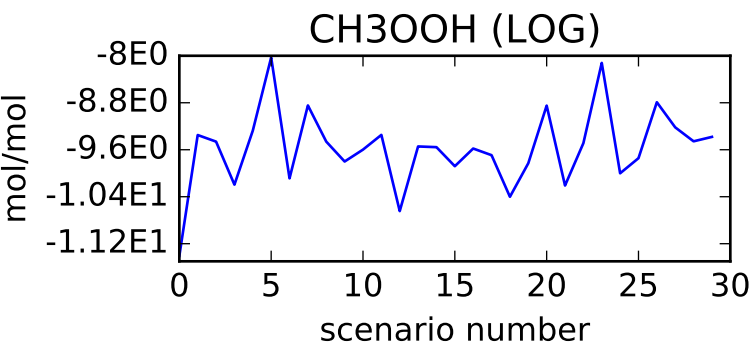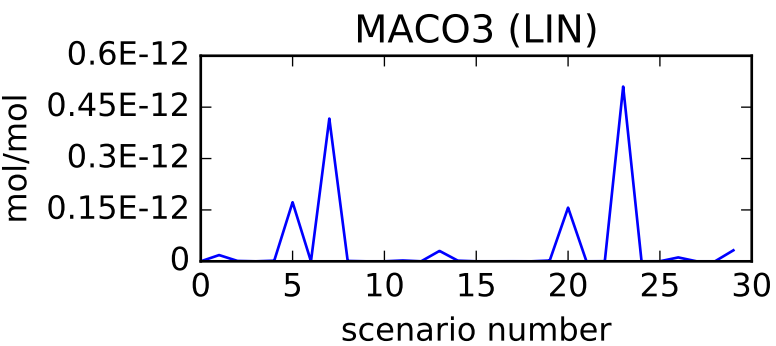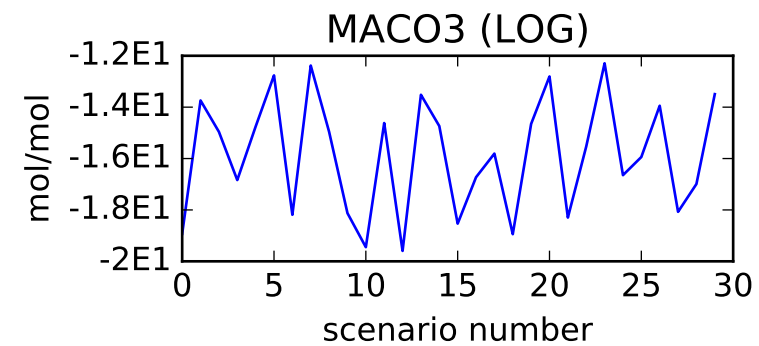

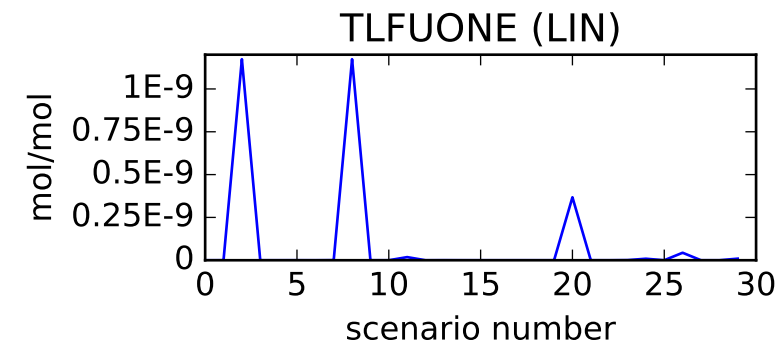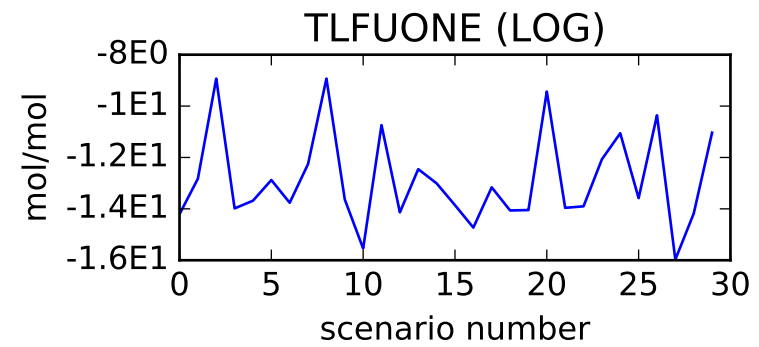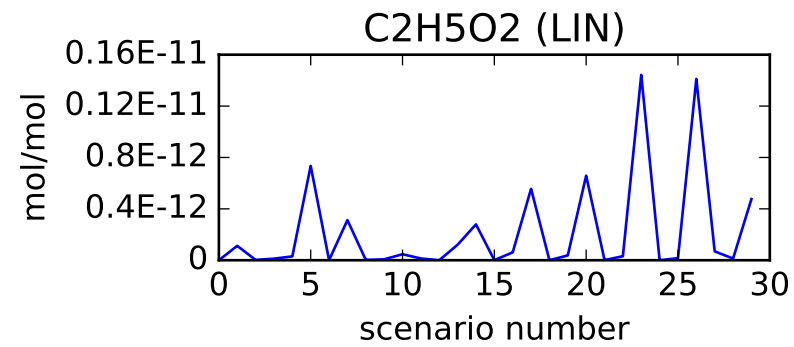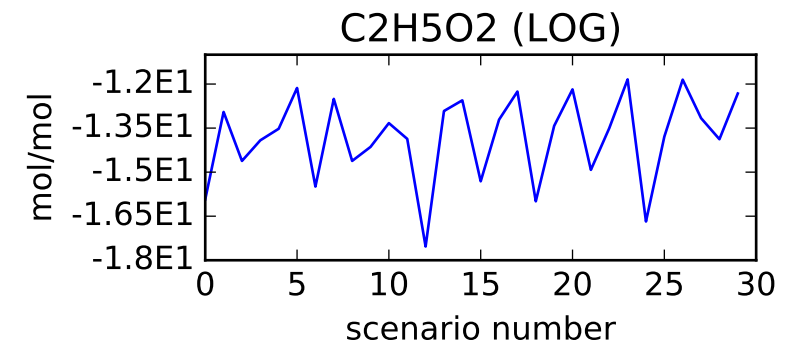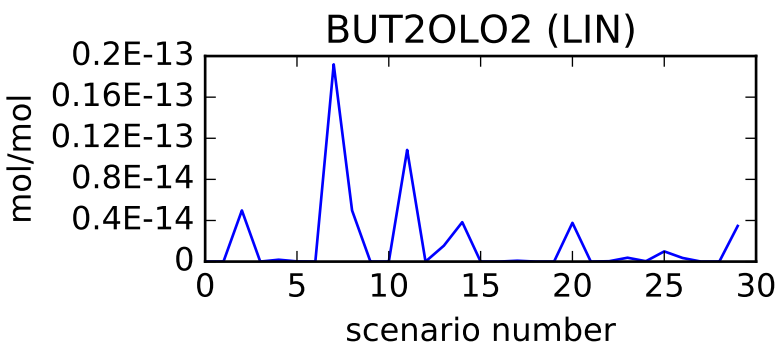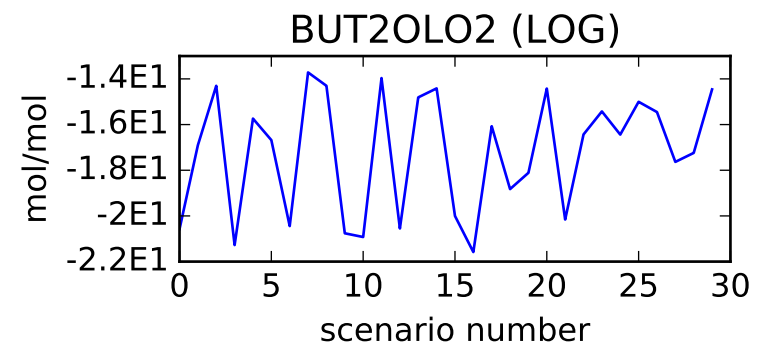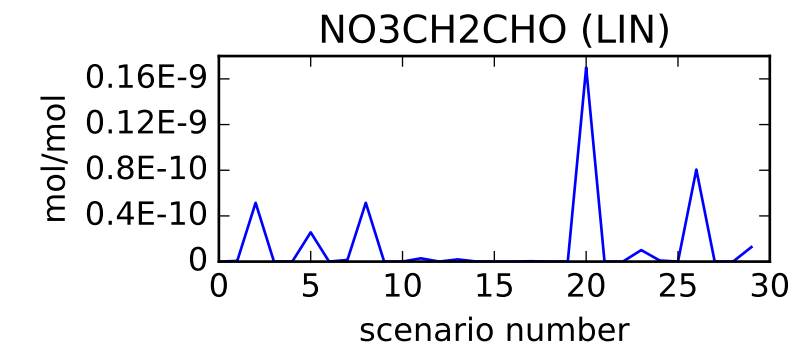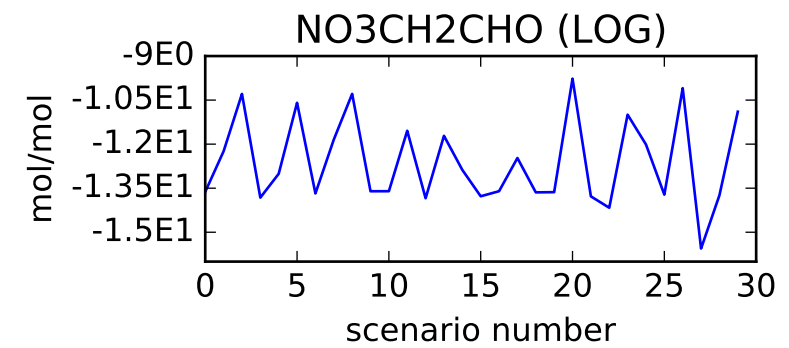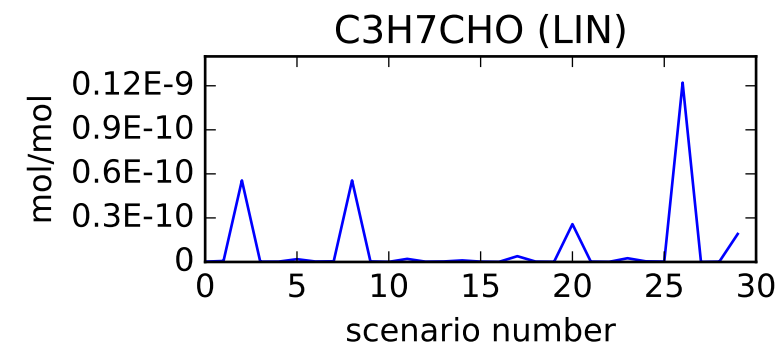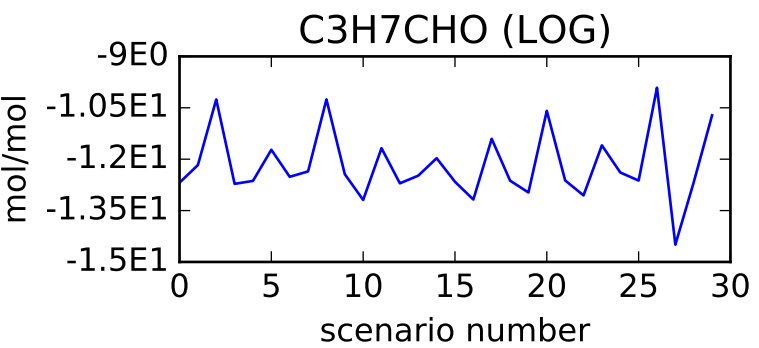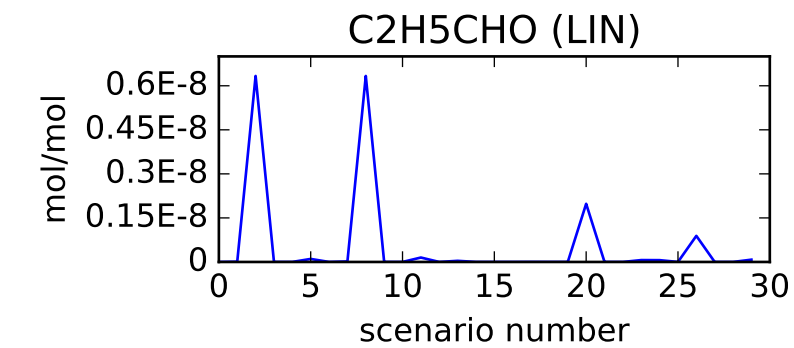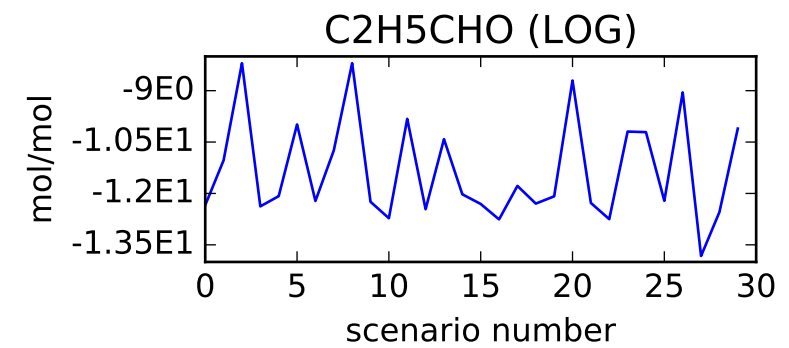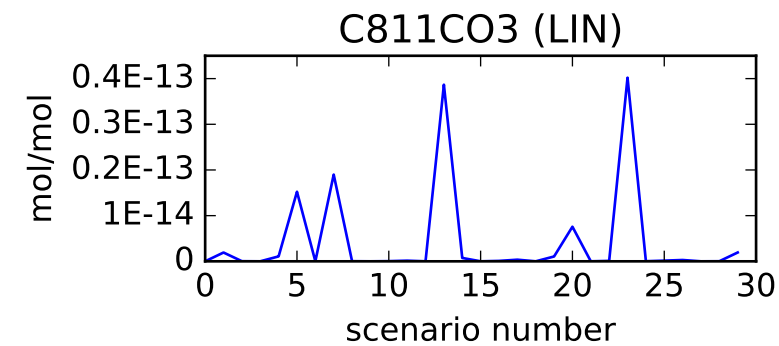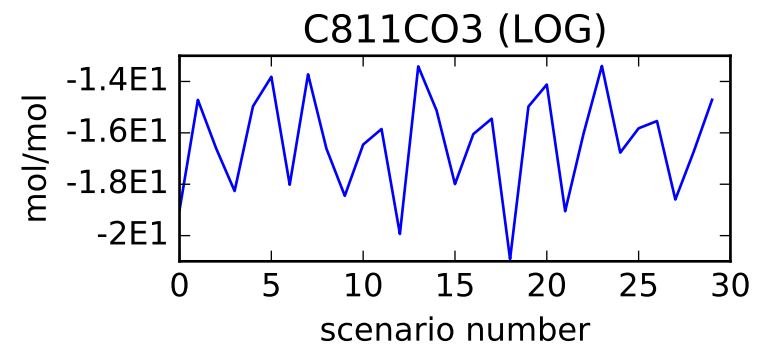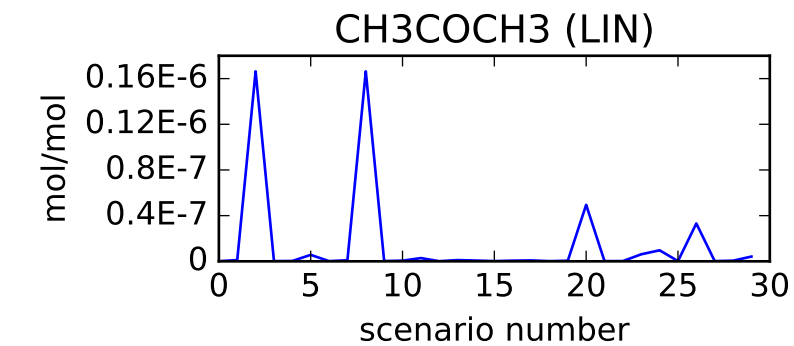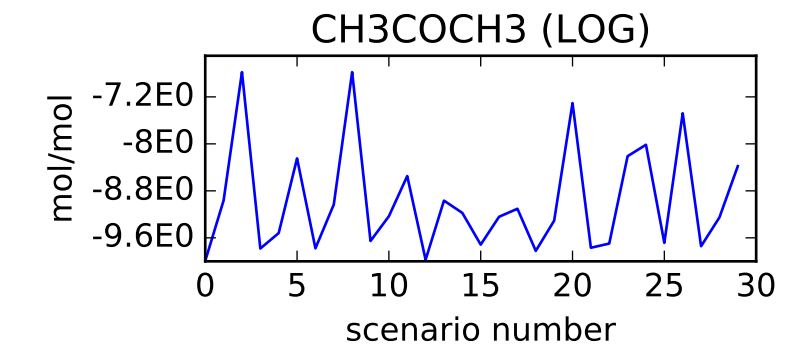

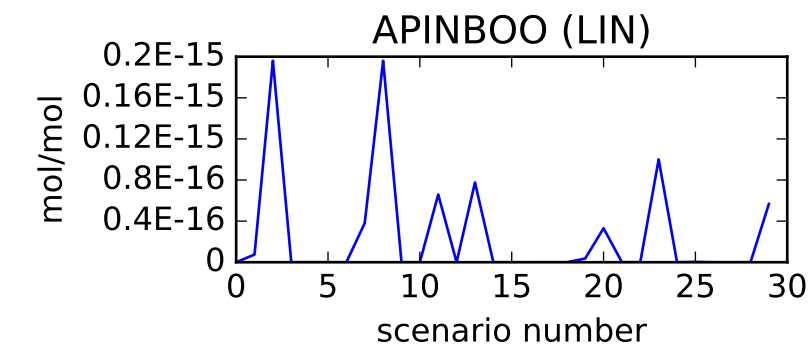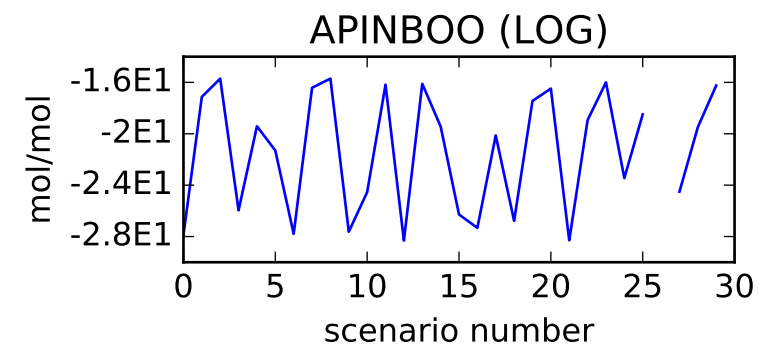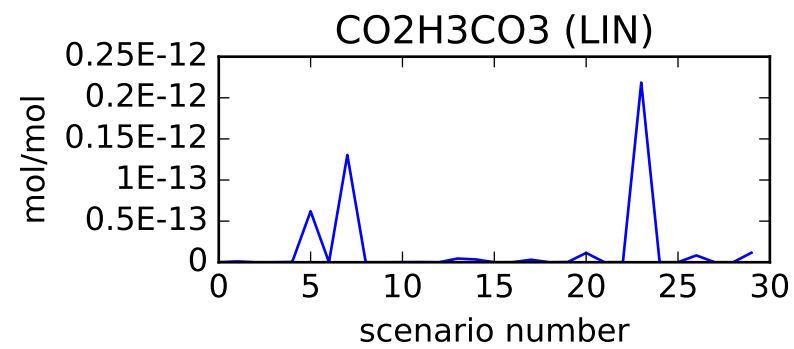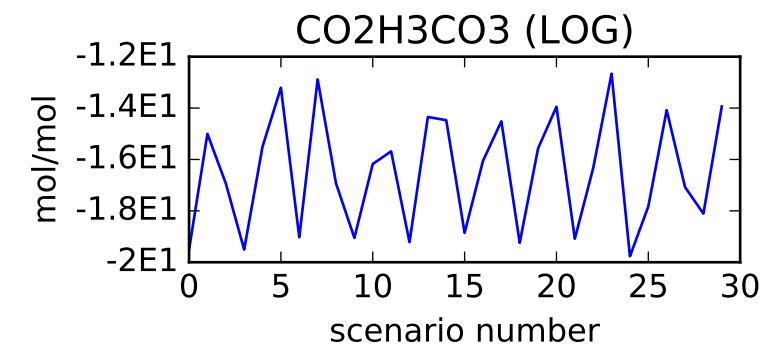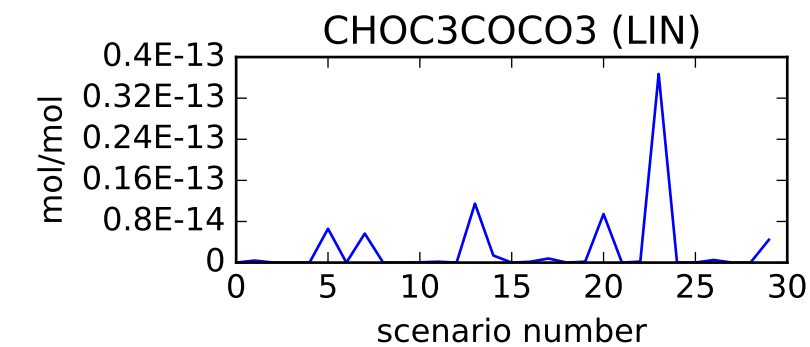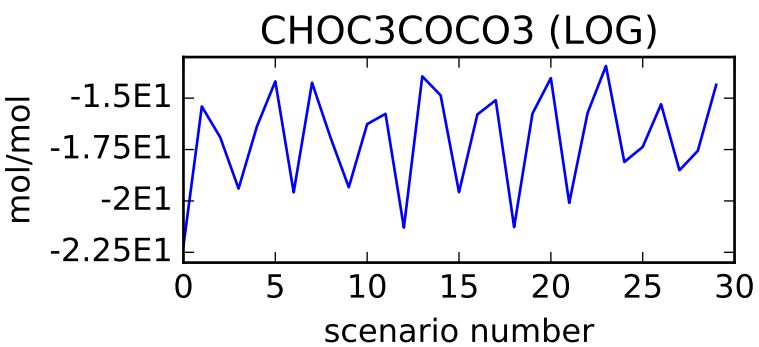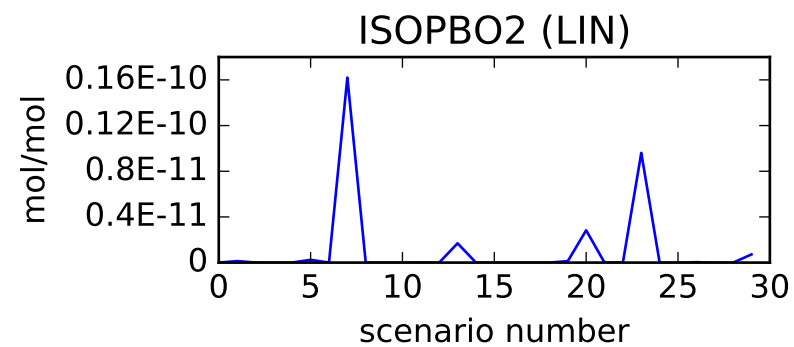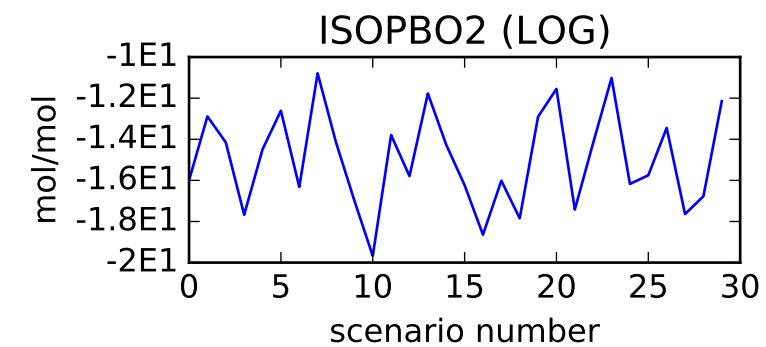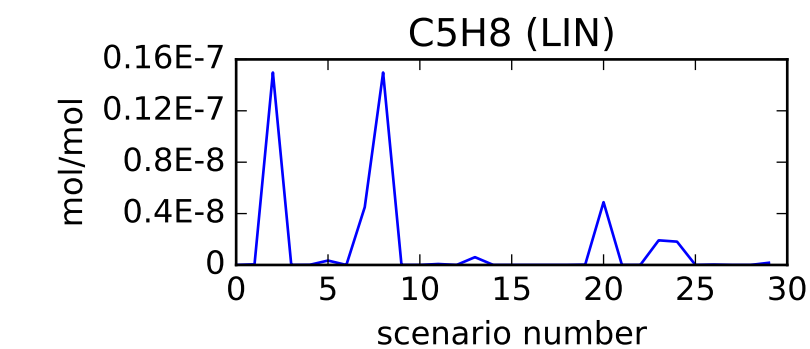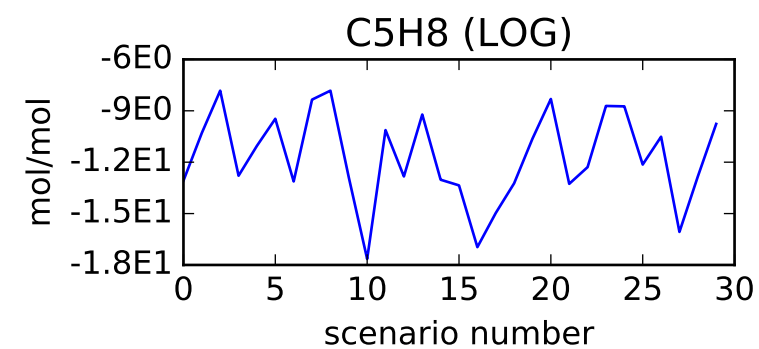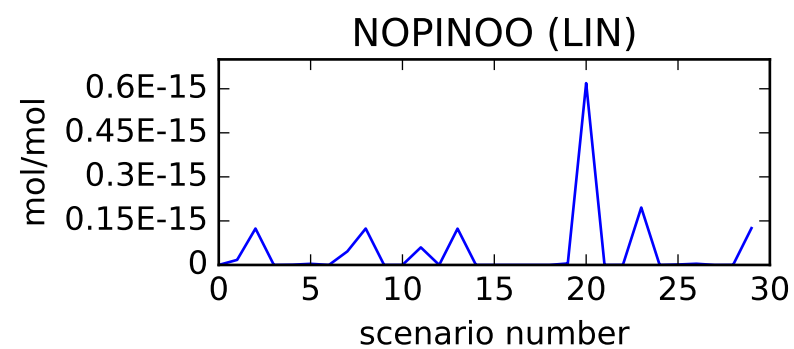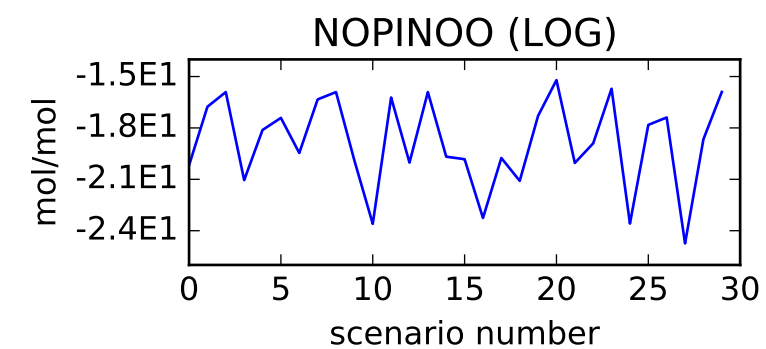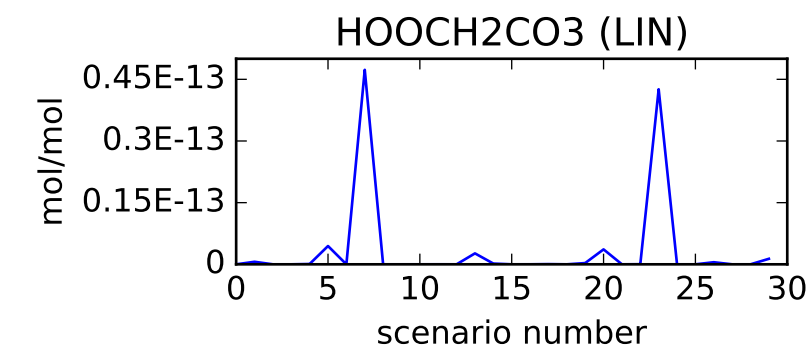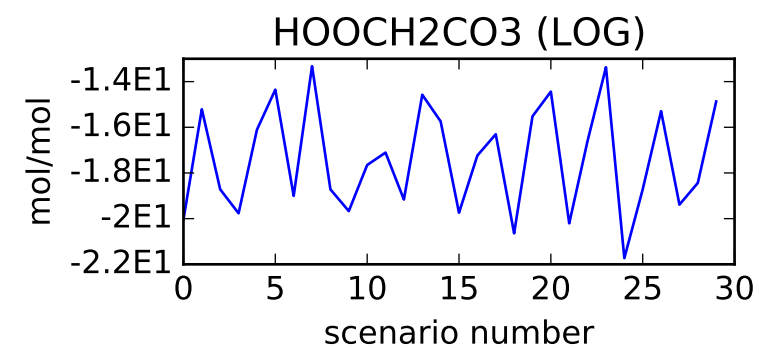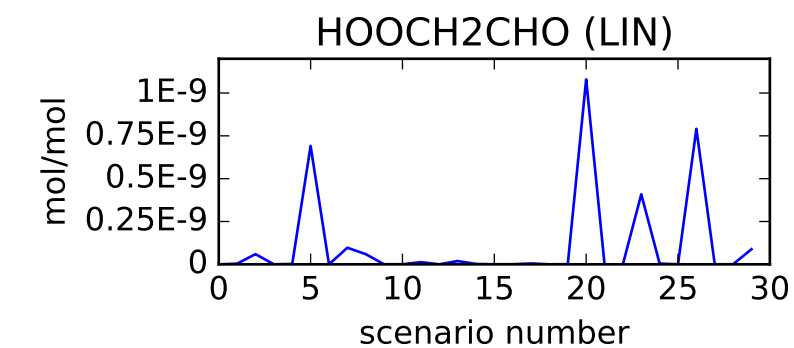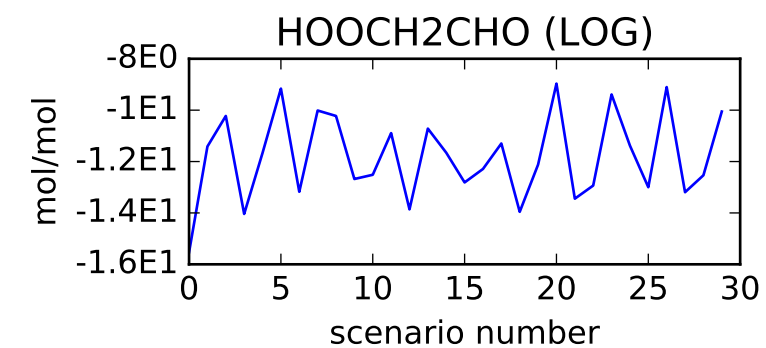

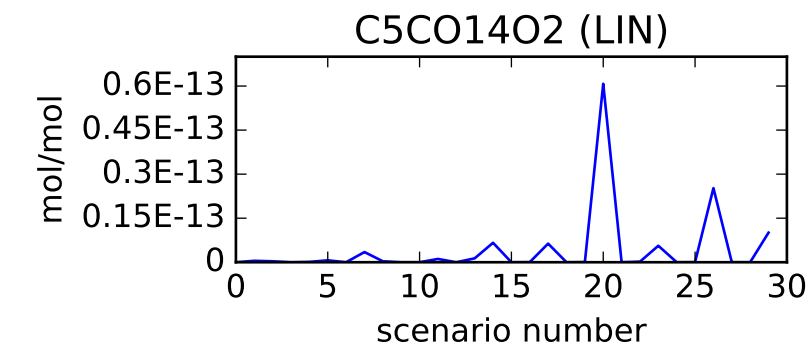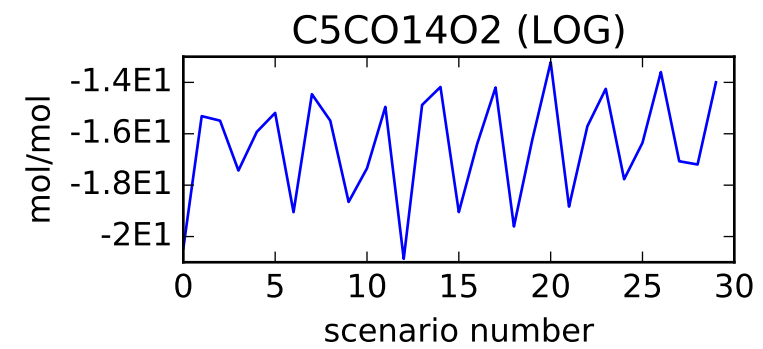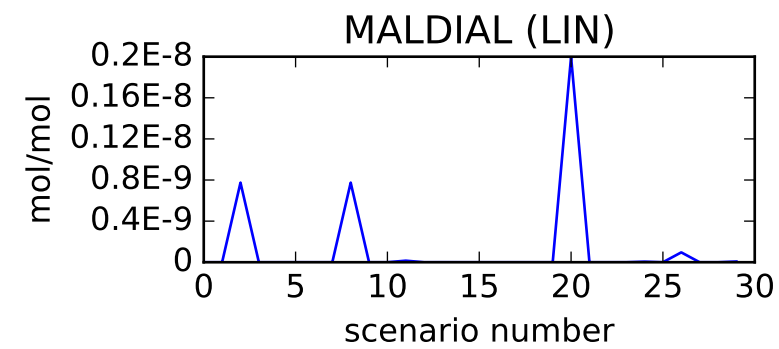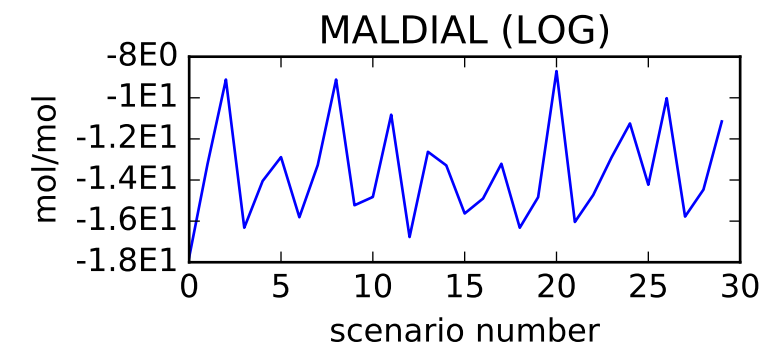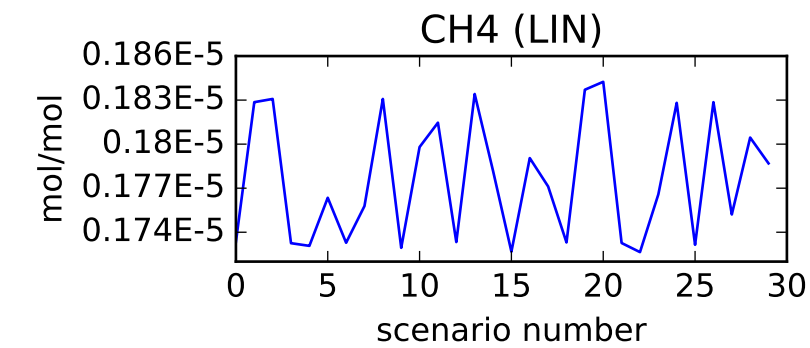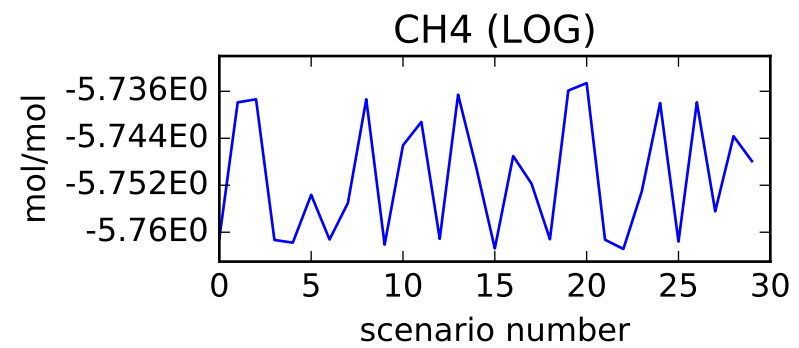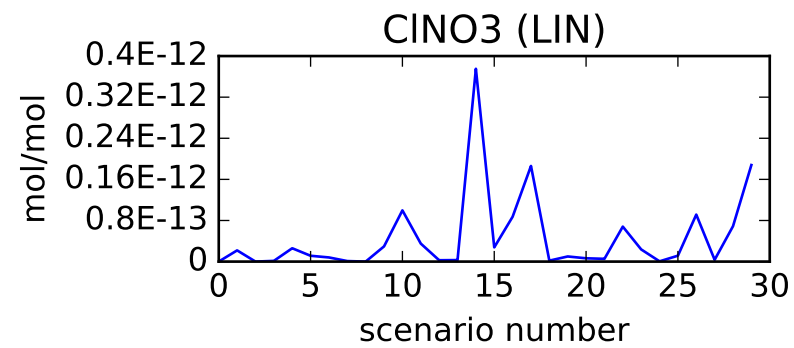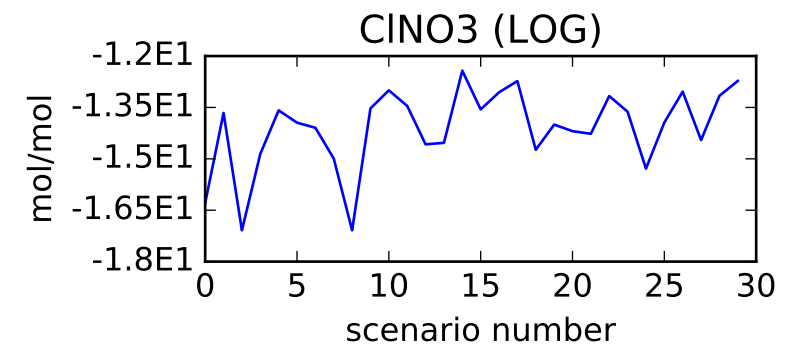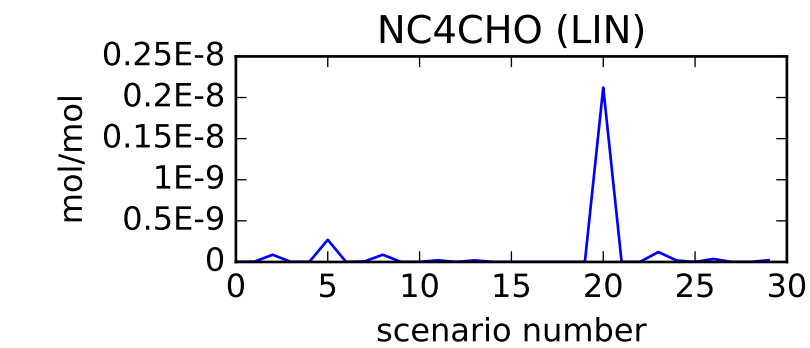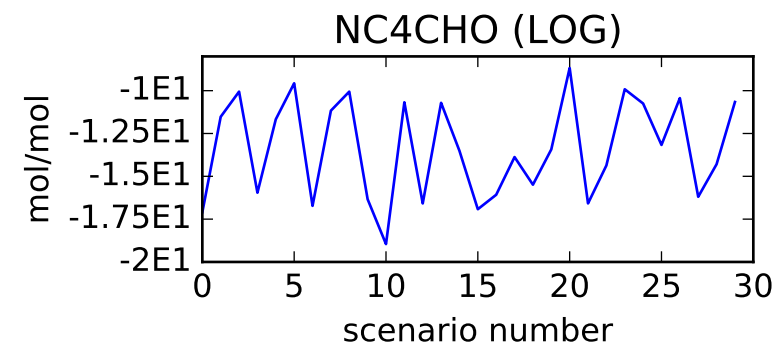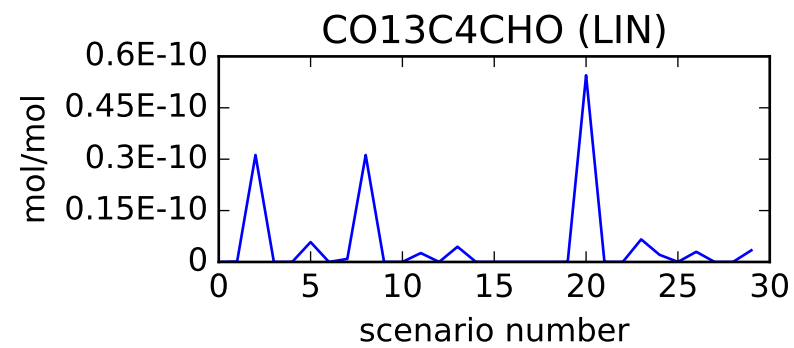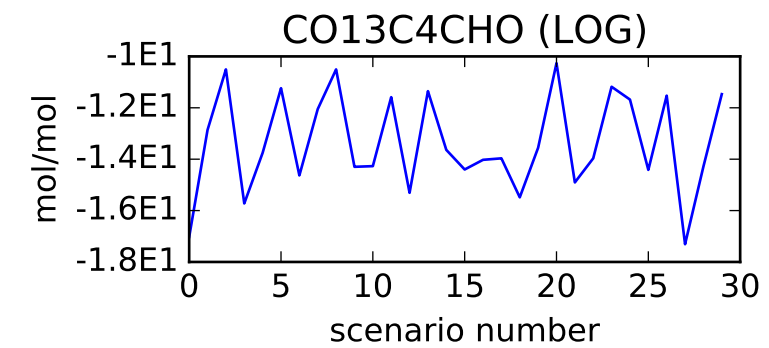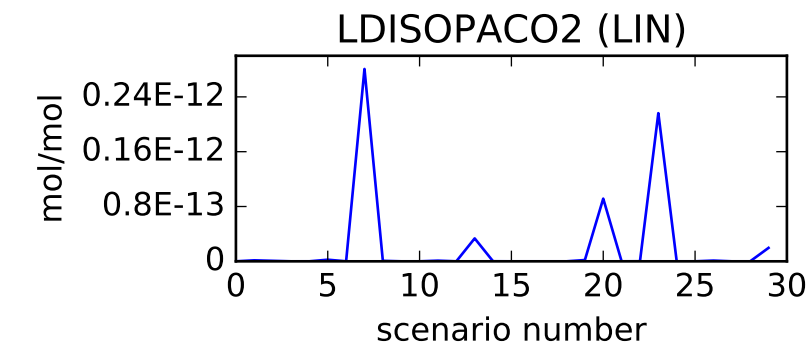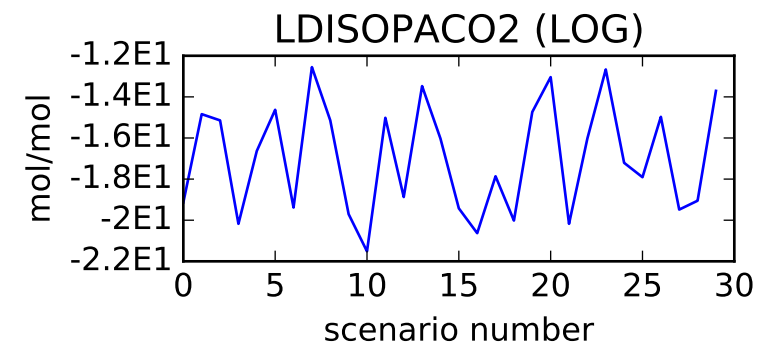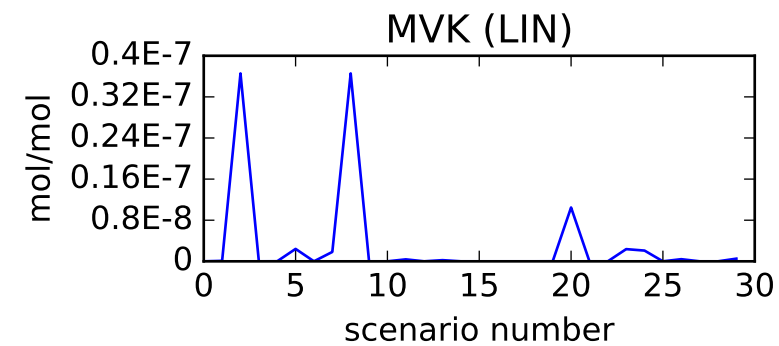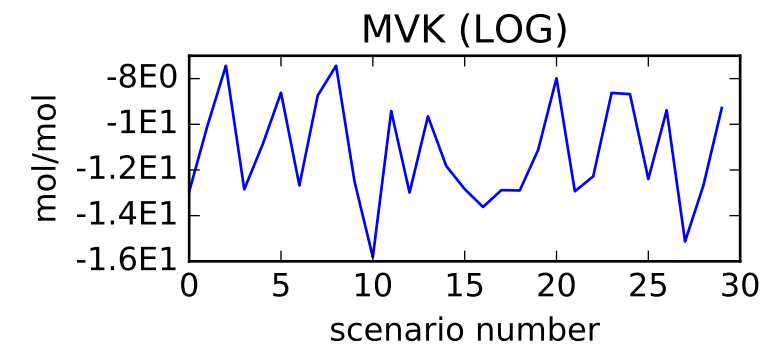



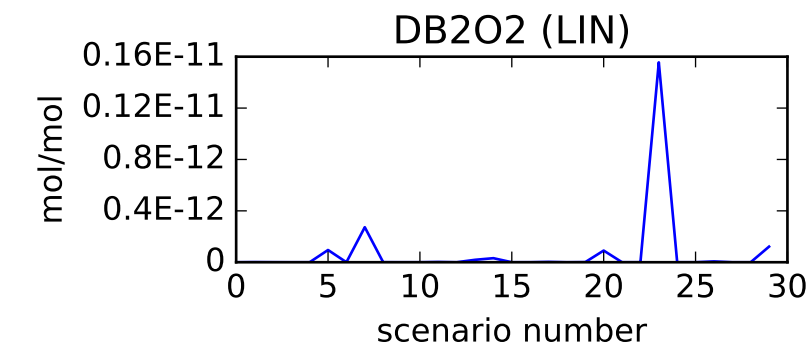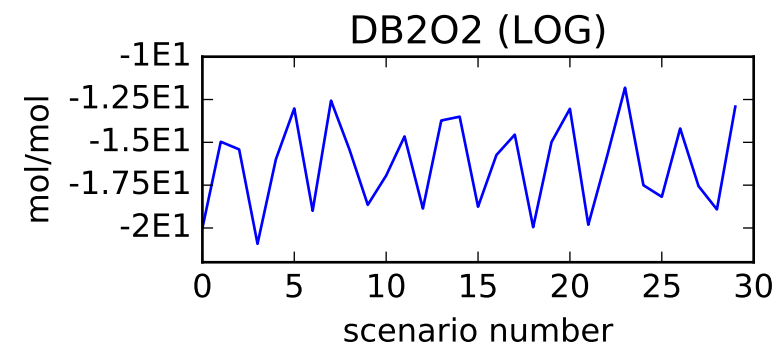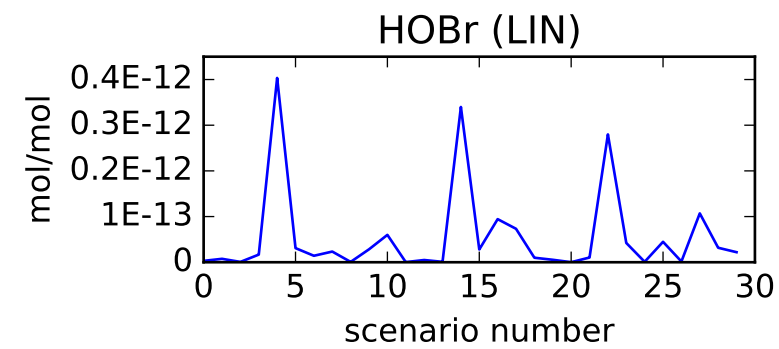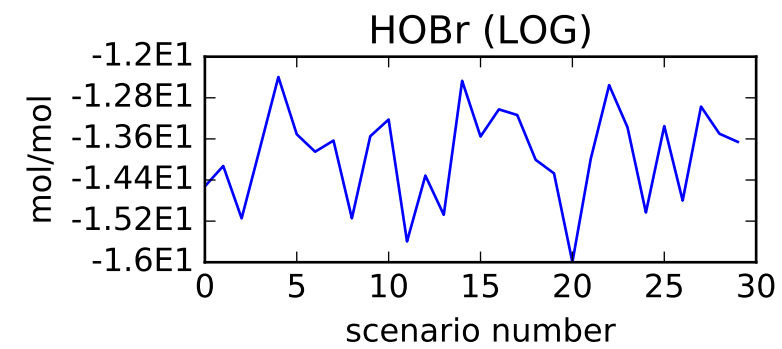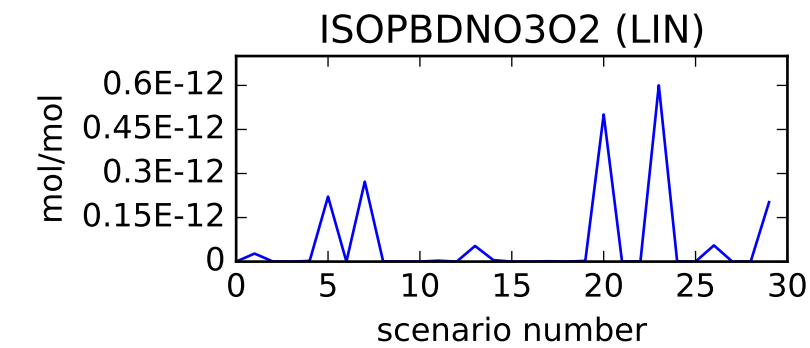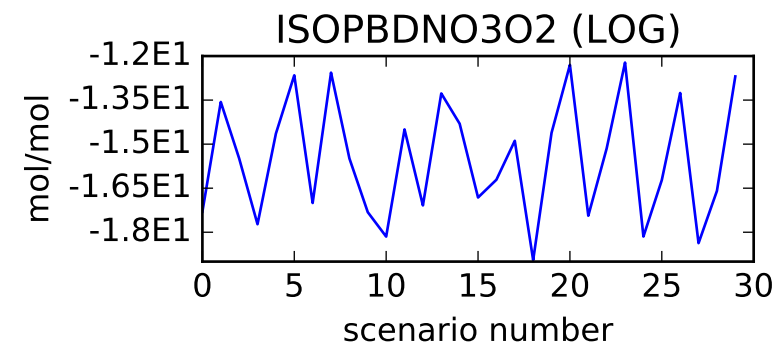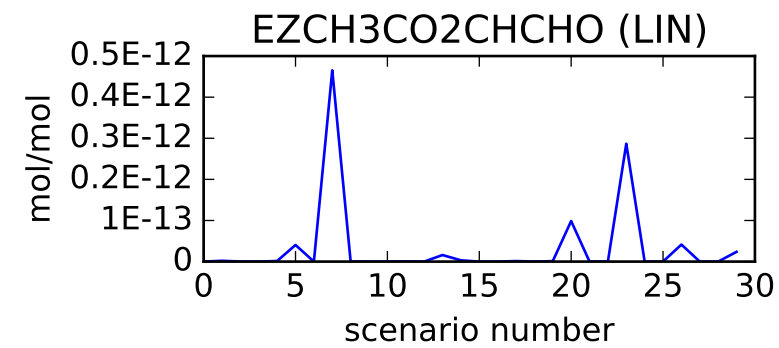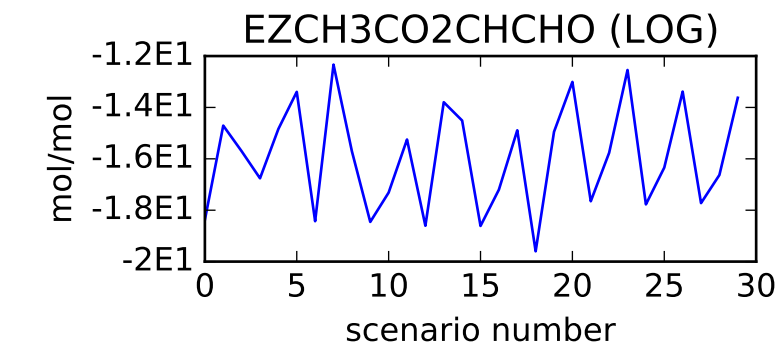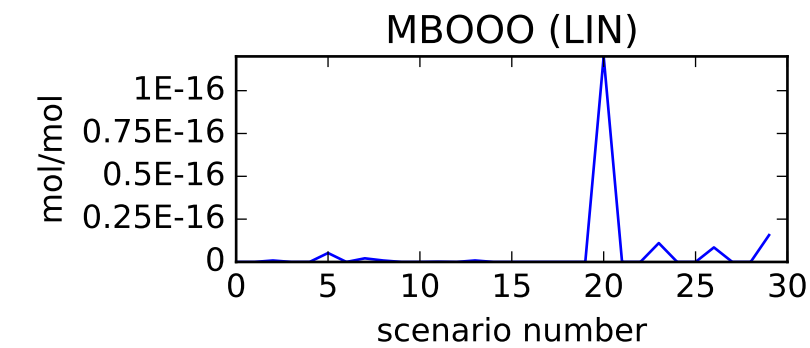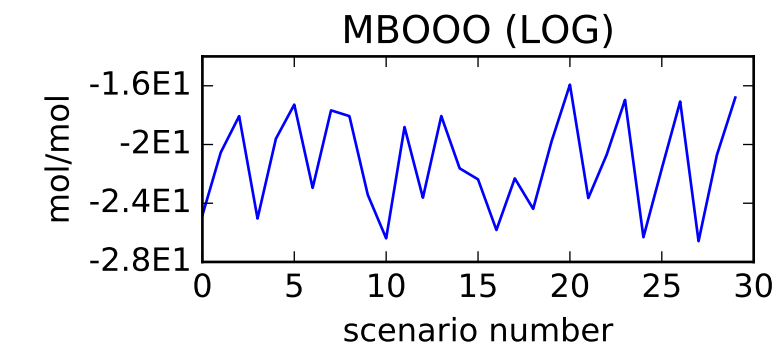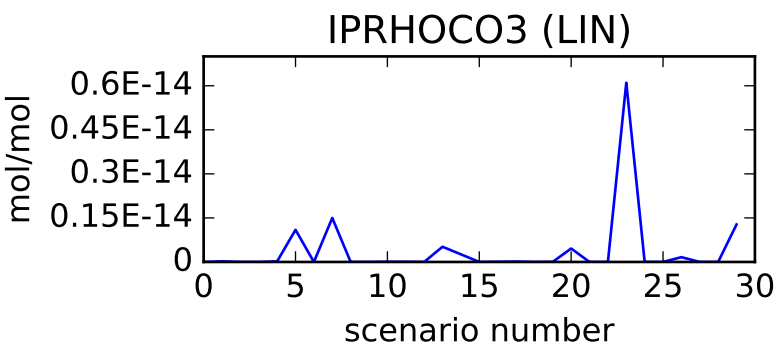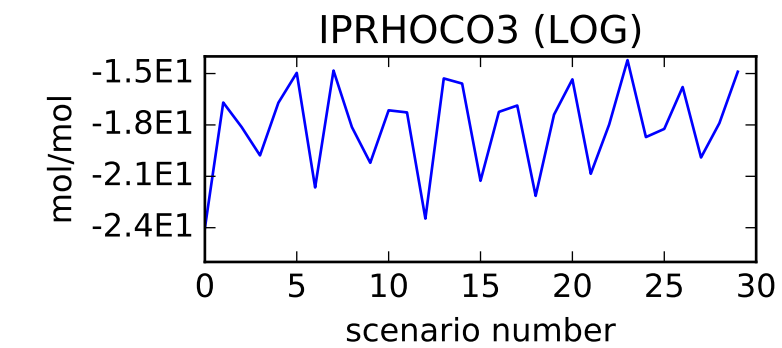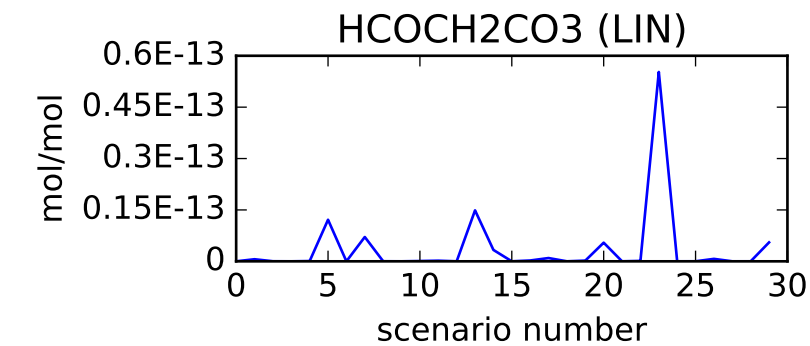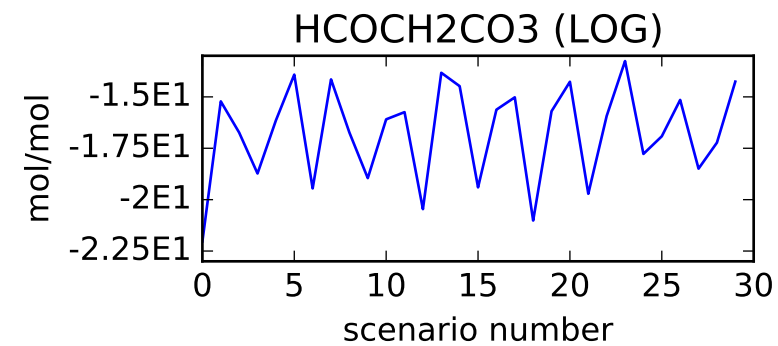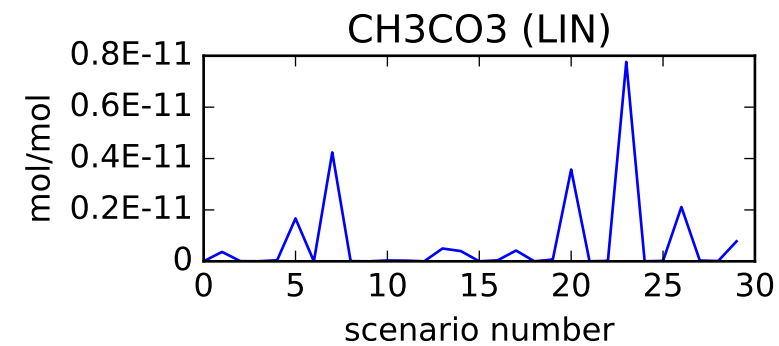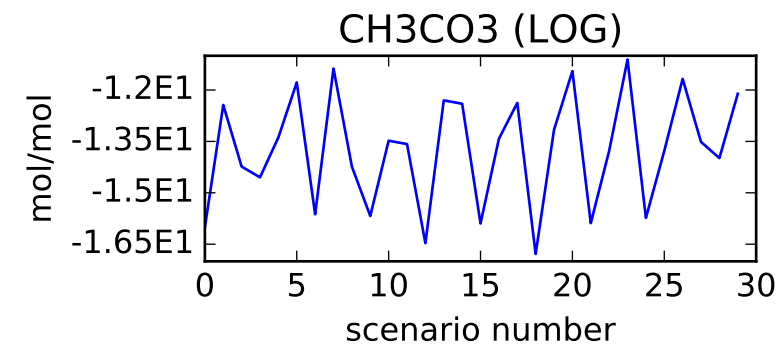

H2O2 (LIN)

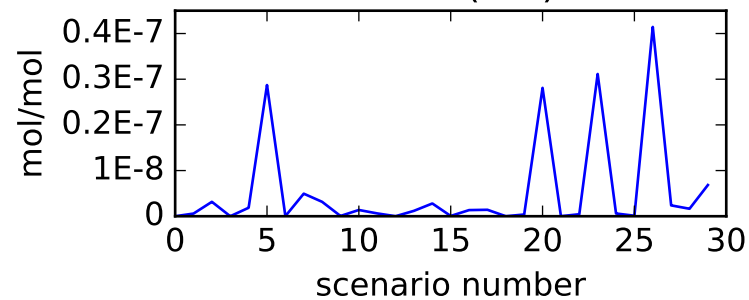

H2O2 (LOG)

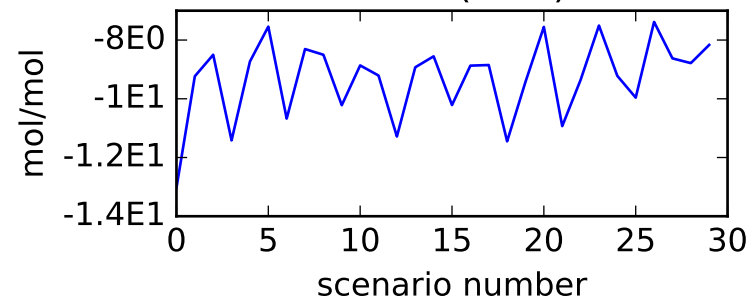

LHC4ACCO3 (LIN)

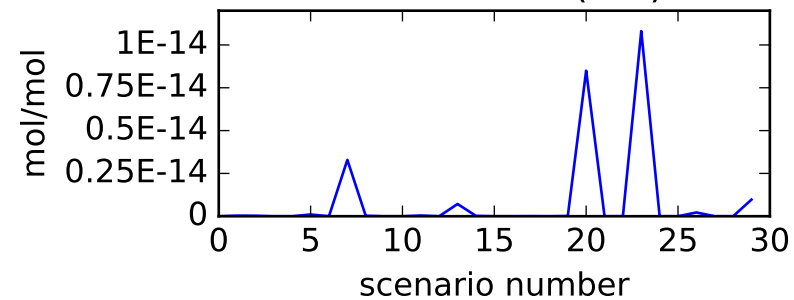

LHC4ACCO3 (LOG)

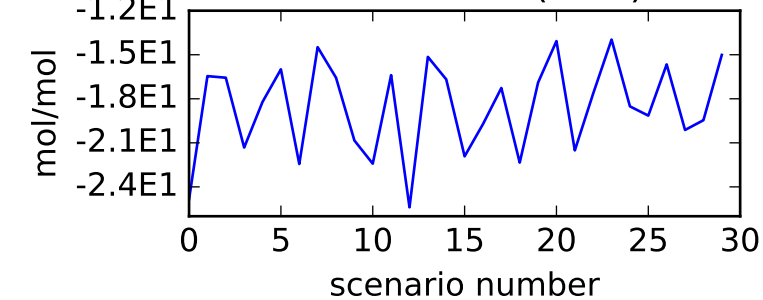

MACRO2 (LIN)

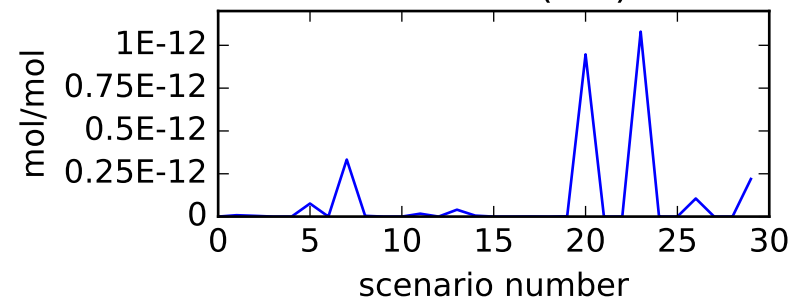

MACRO2 (LOG)

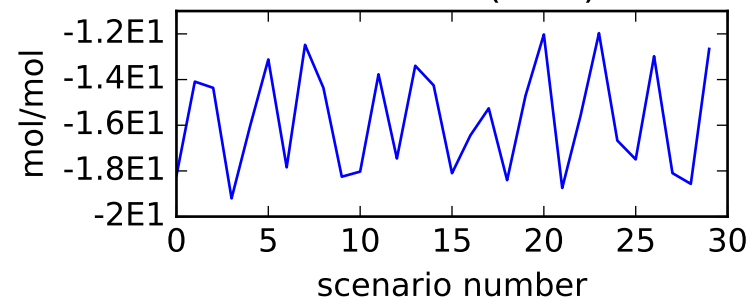

H (LIN)

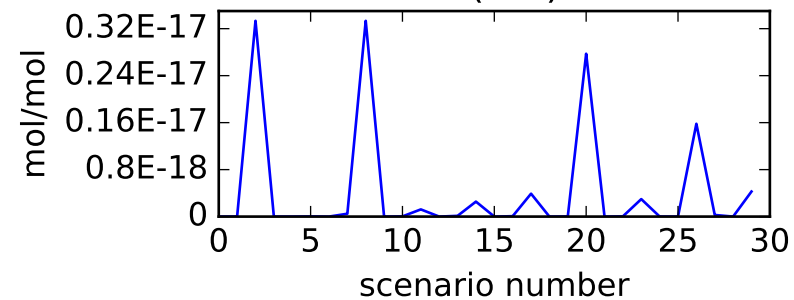

H (LOG)

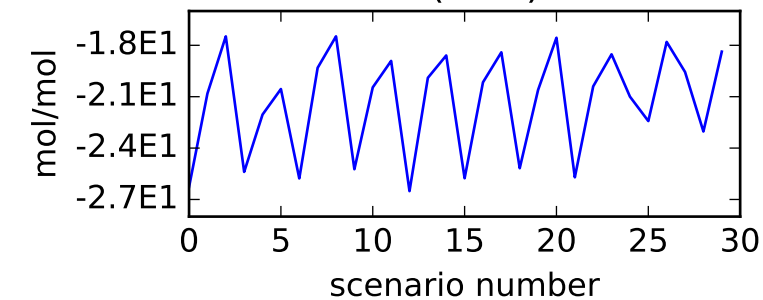

C5DICARB (LIN)

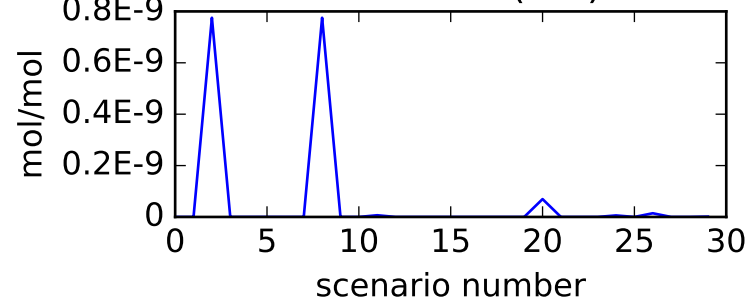

C5DICARB (LOG)

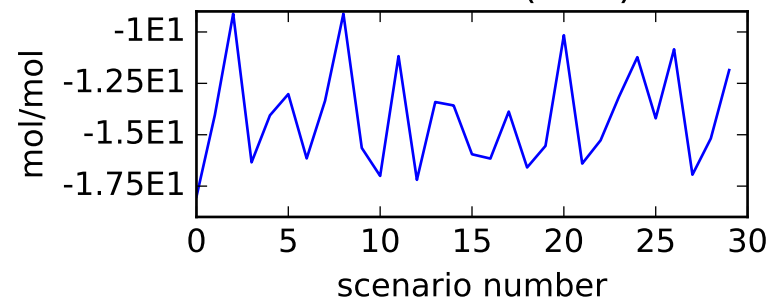

HCOCO3 (LIN)

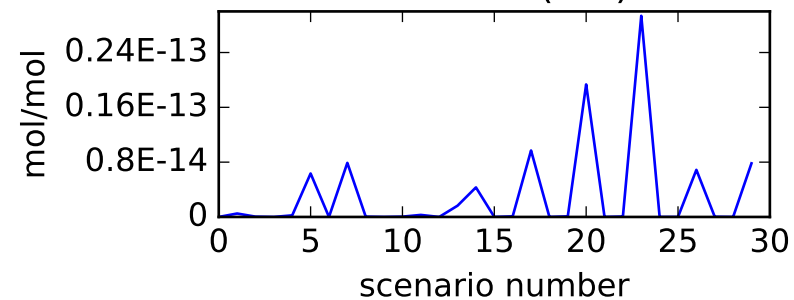

HCOCO3 (LOG)

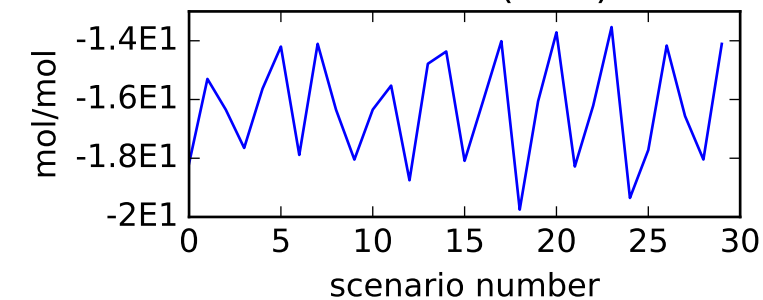

CHOCOCH2O2 (LIN)

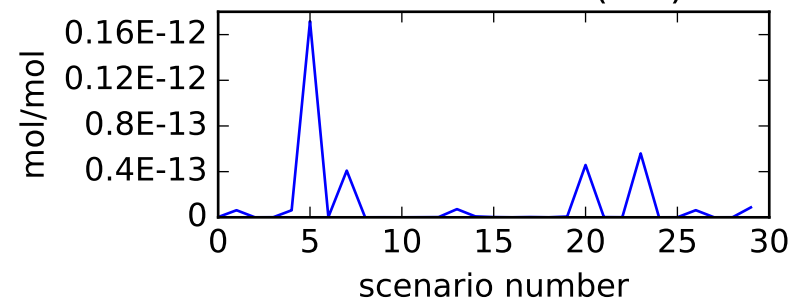

CHOCOCH2O2 (LOG)

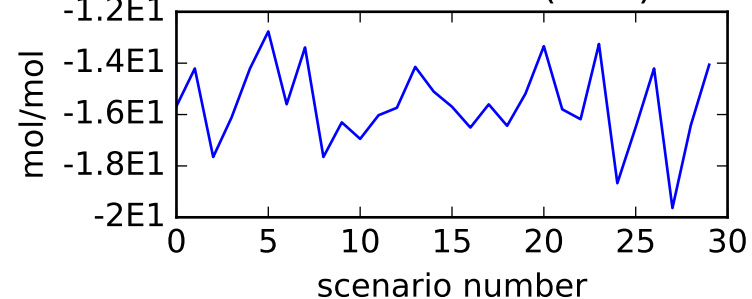

MACR (LIN)

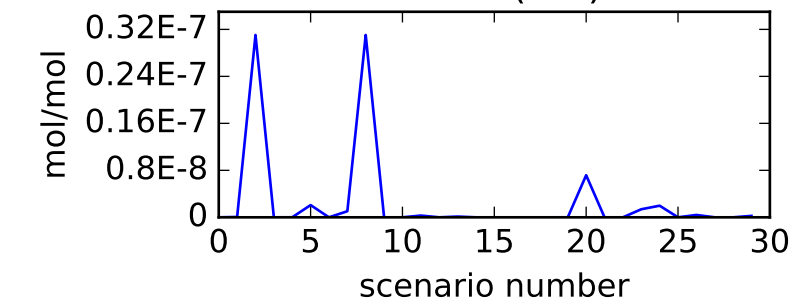

MACR (LOG)

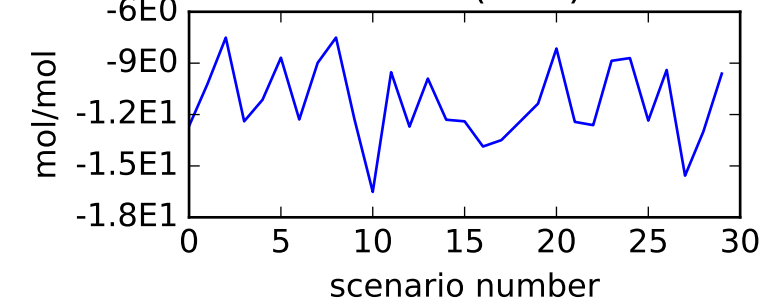

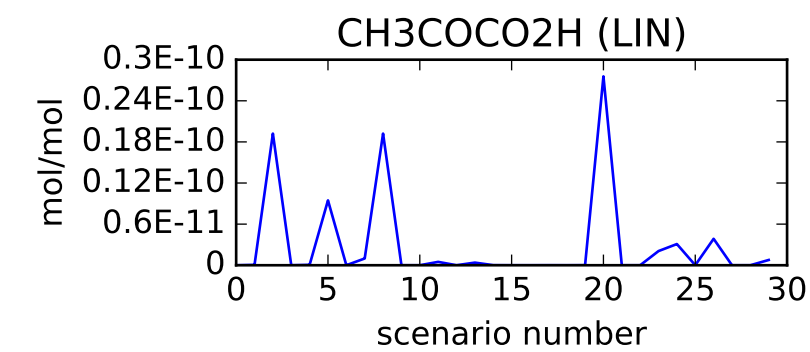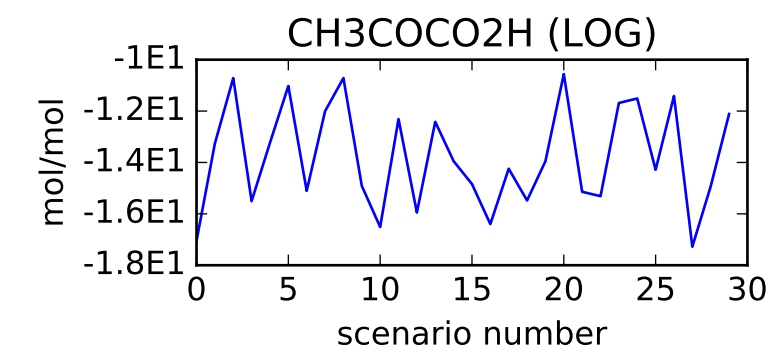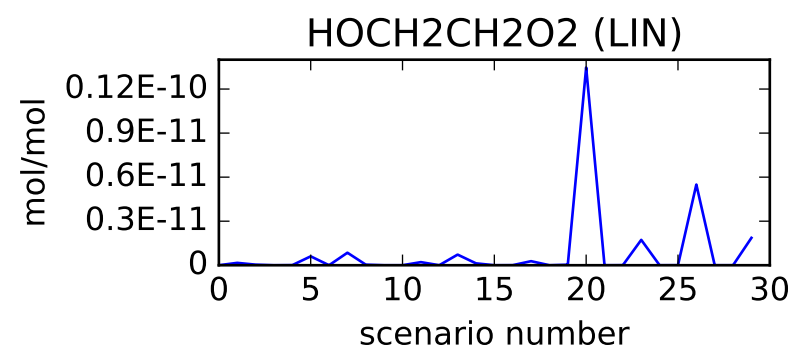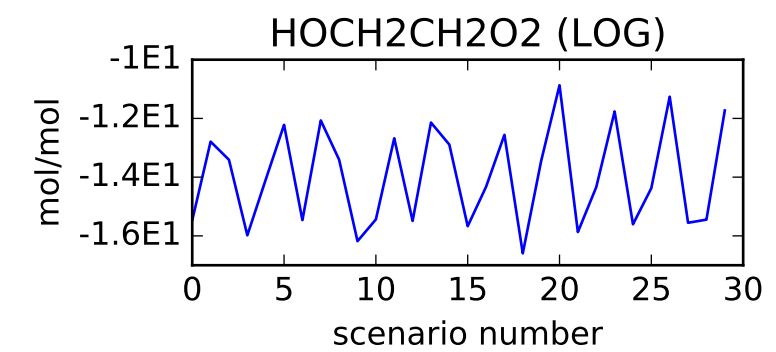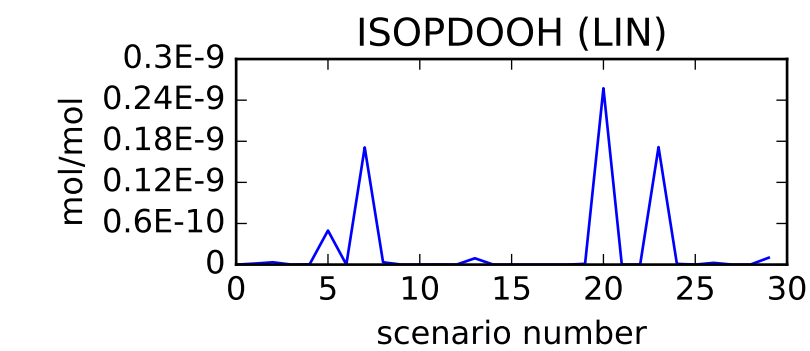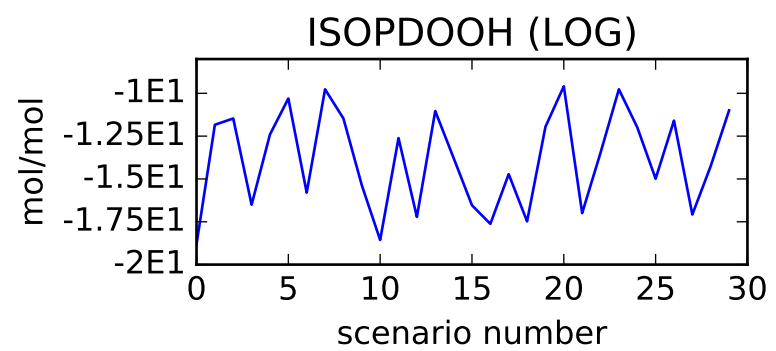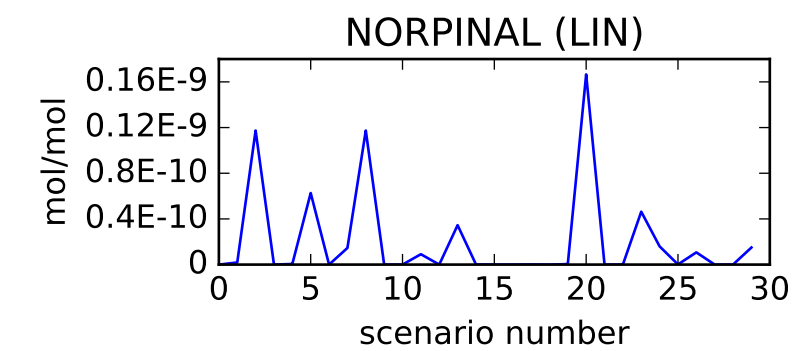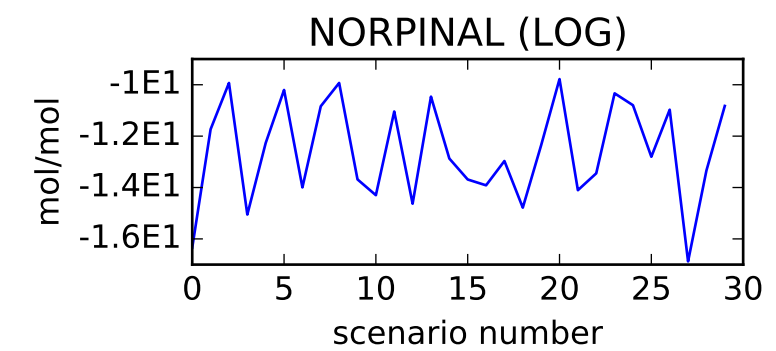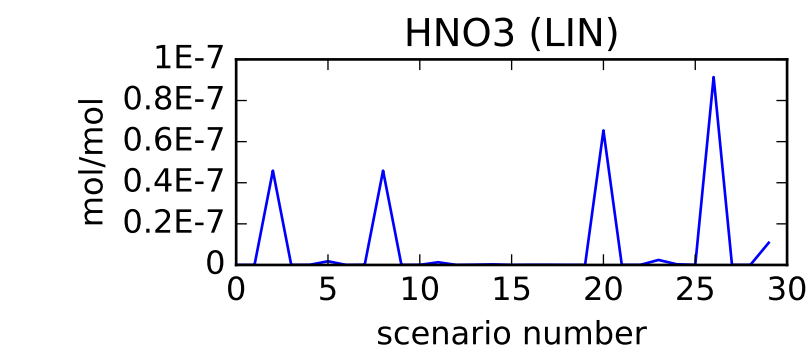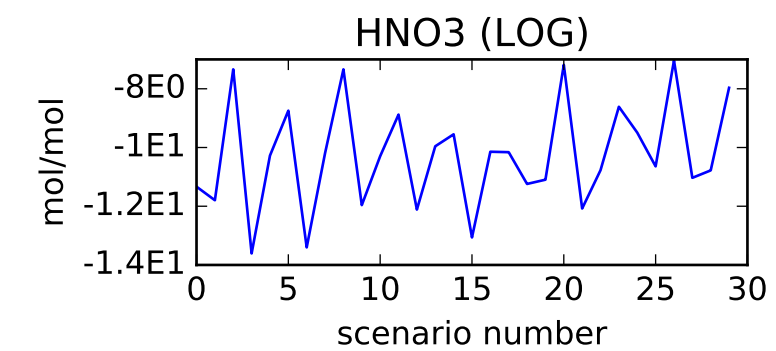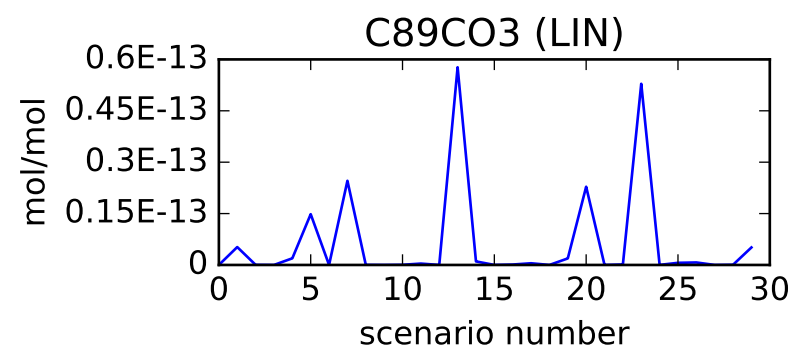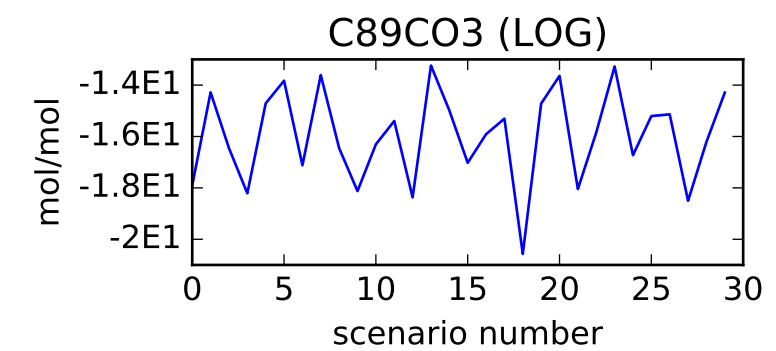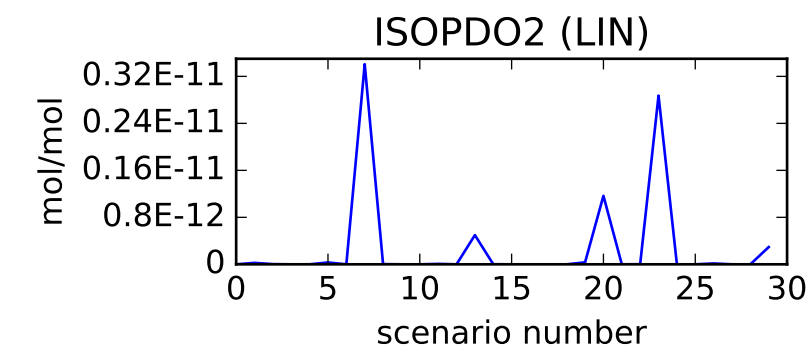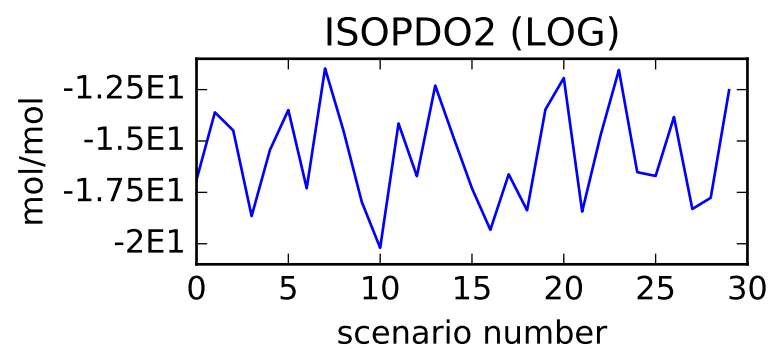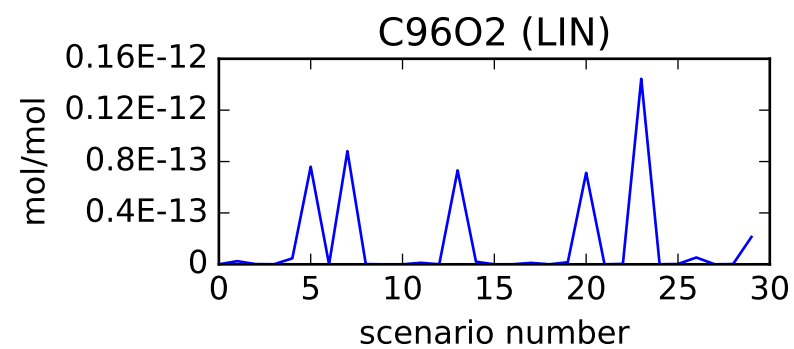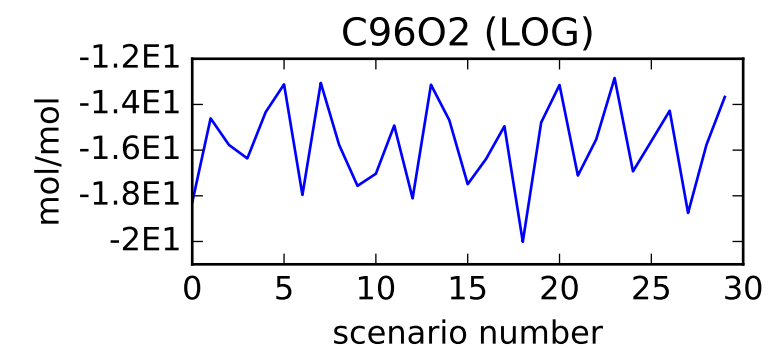

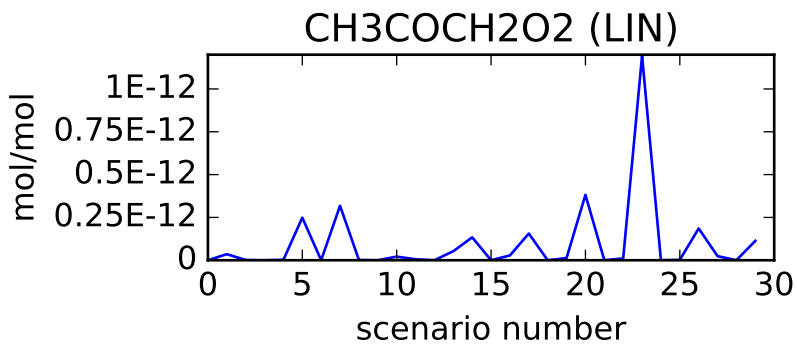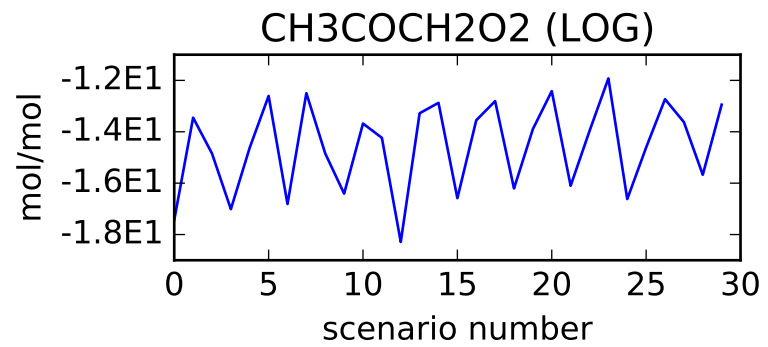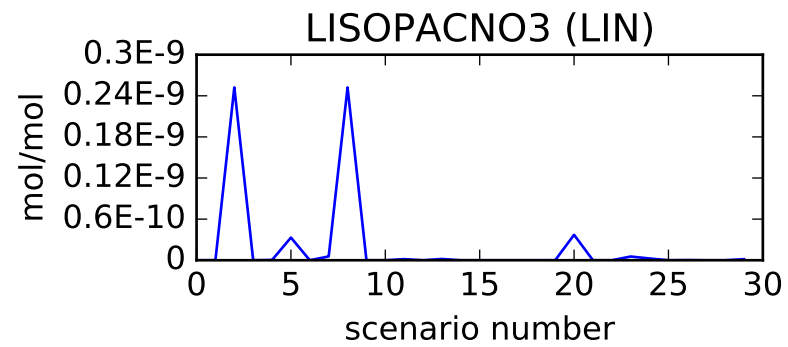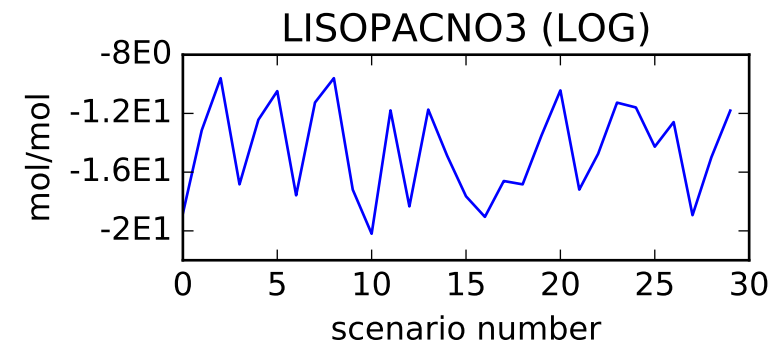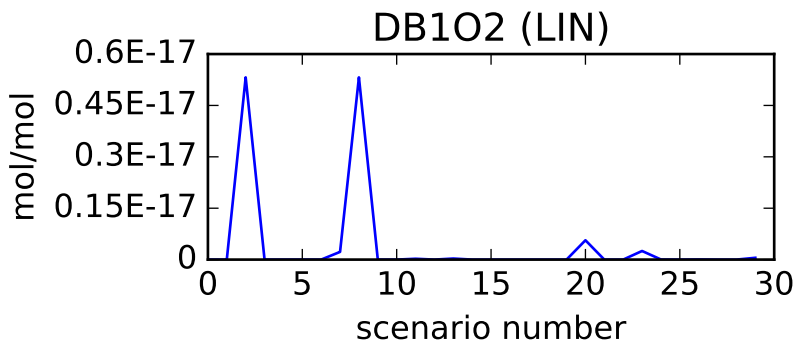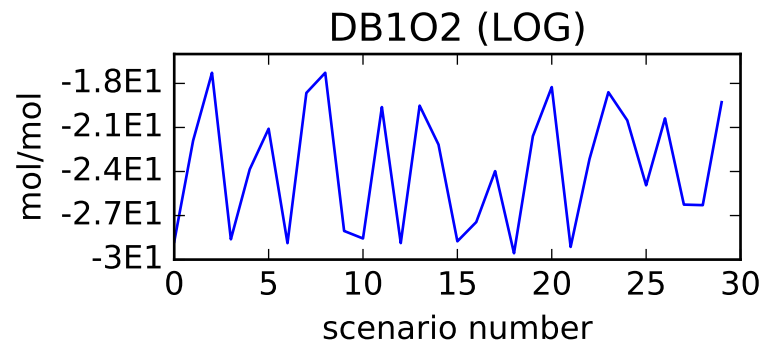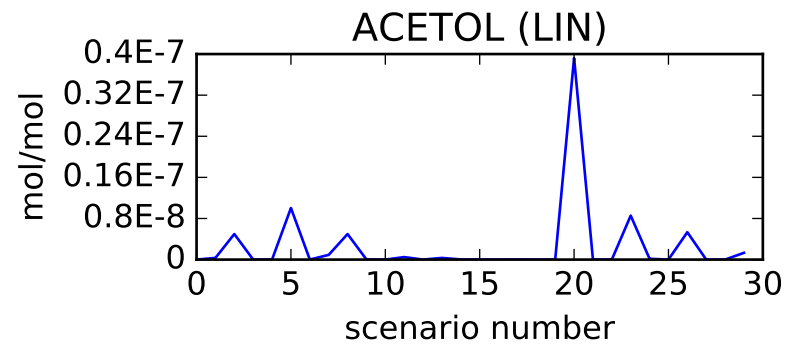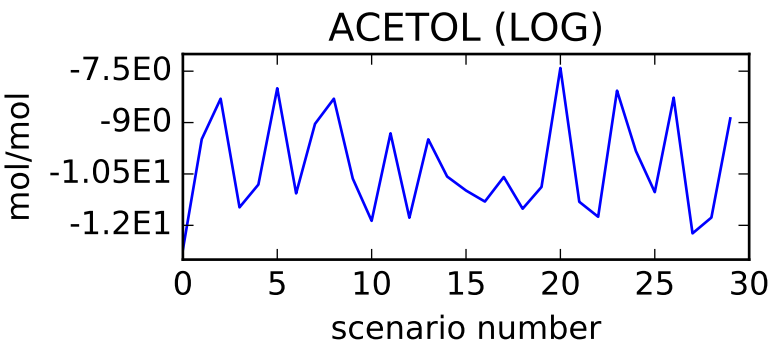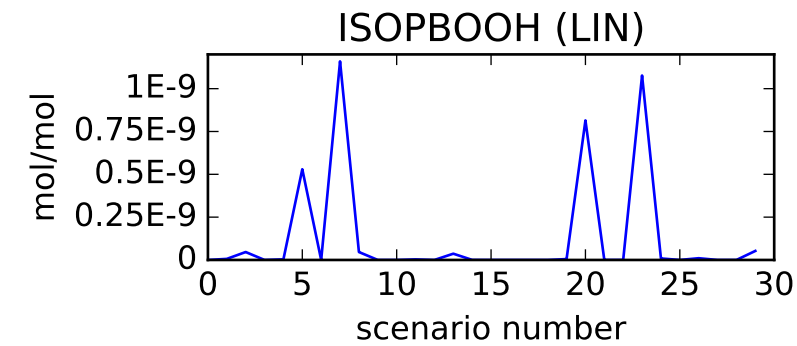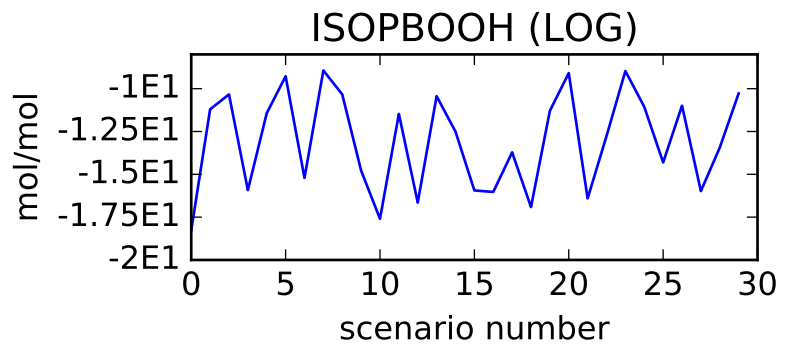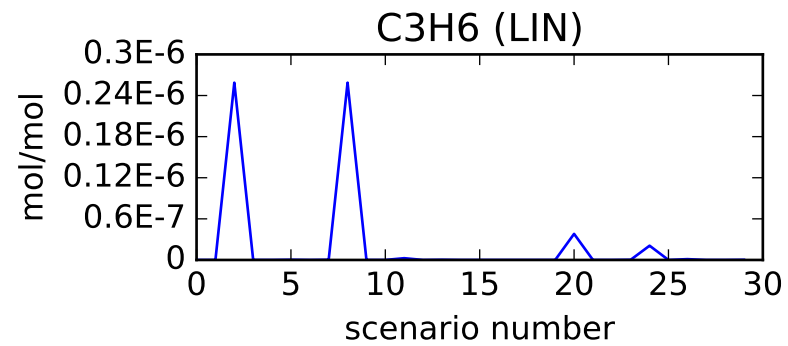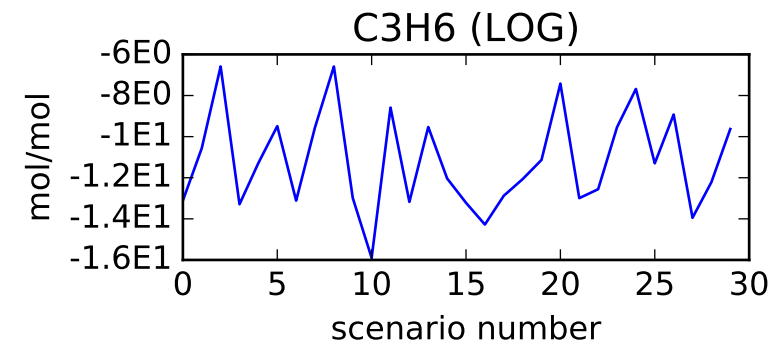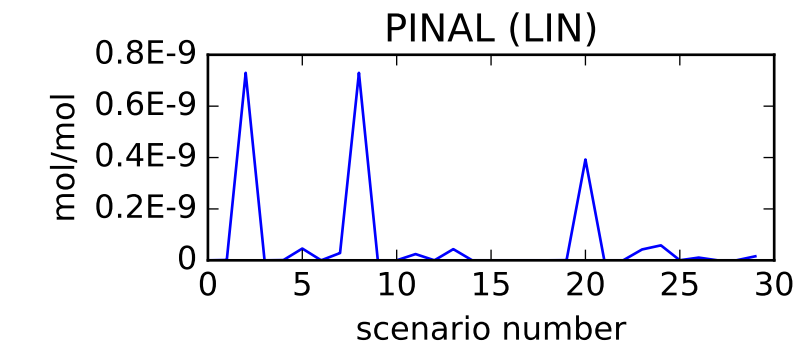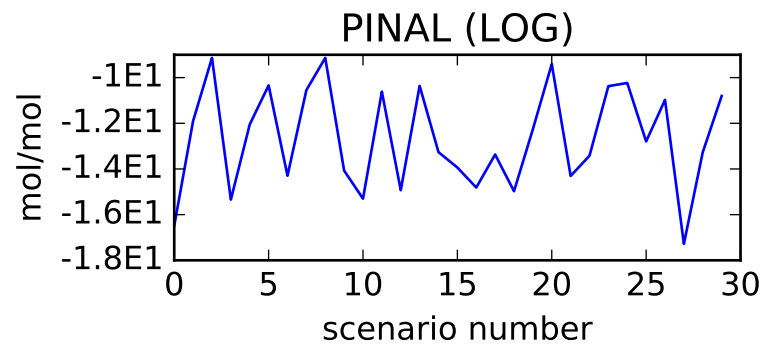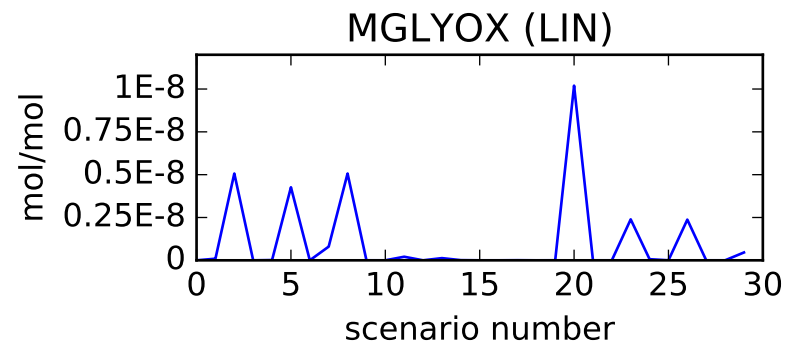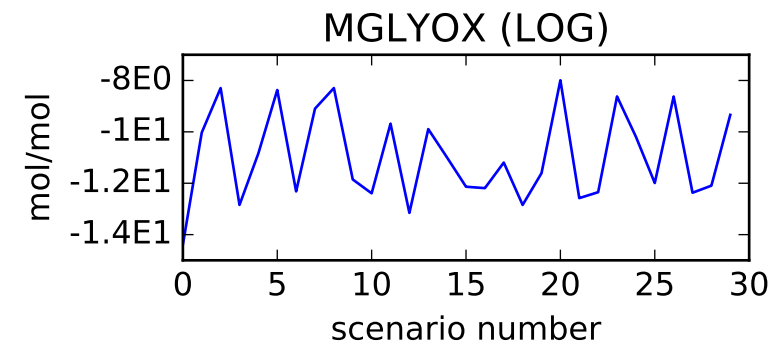

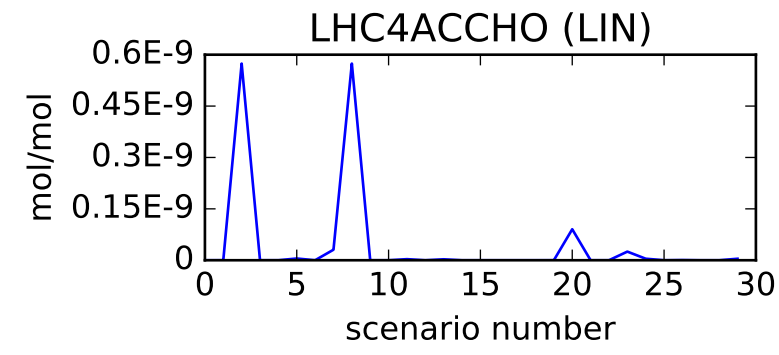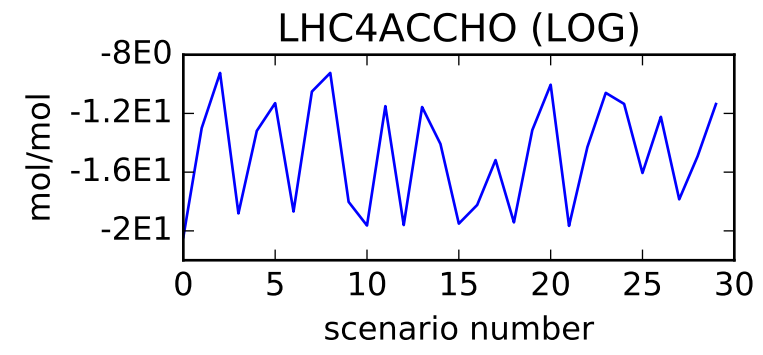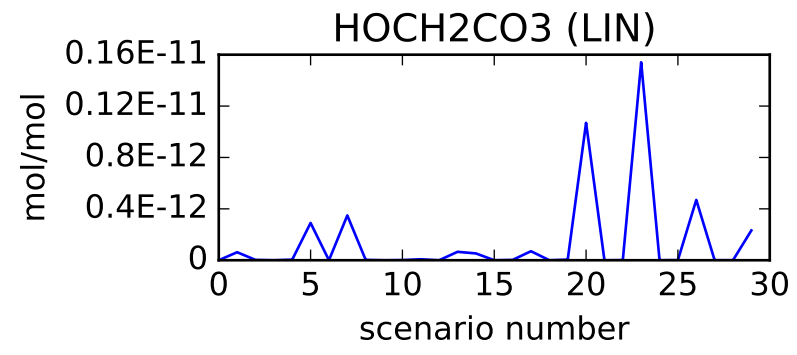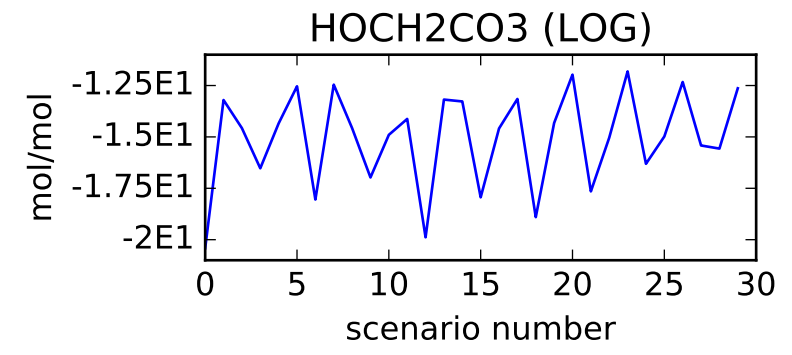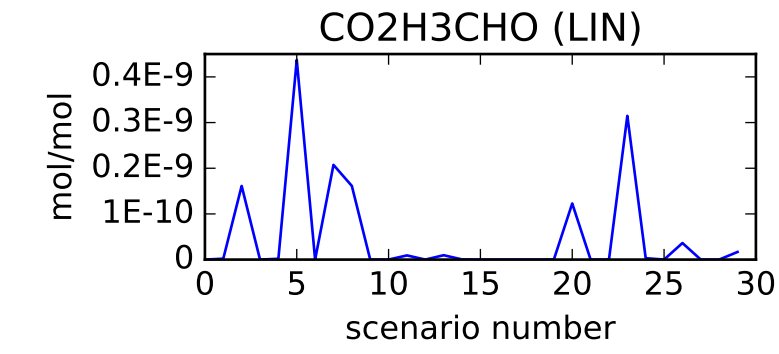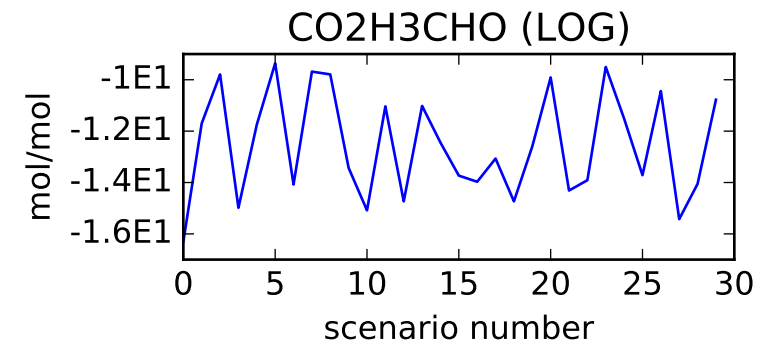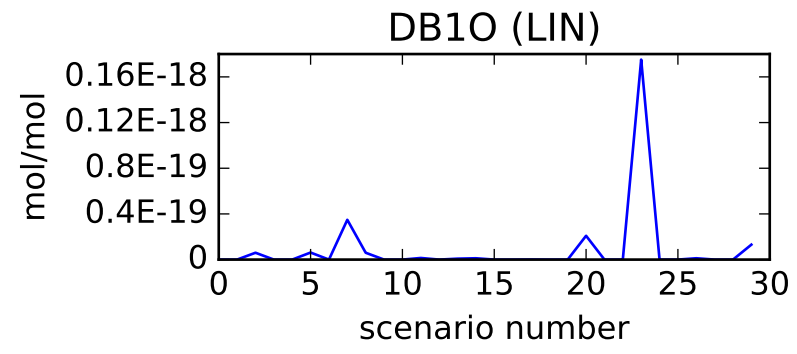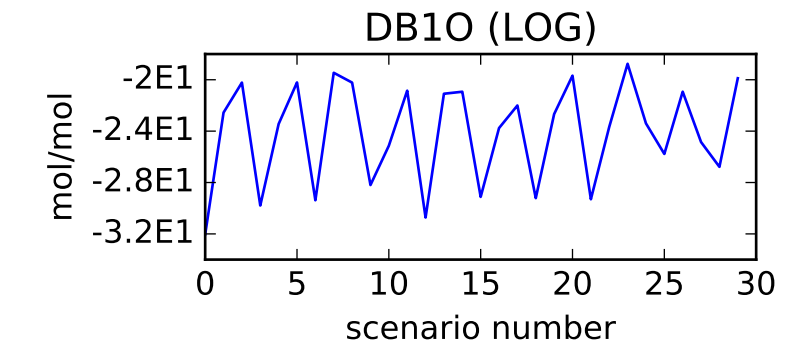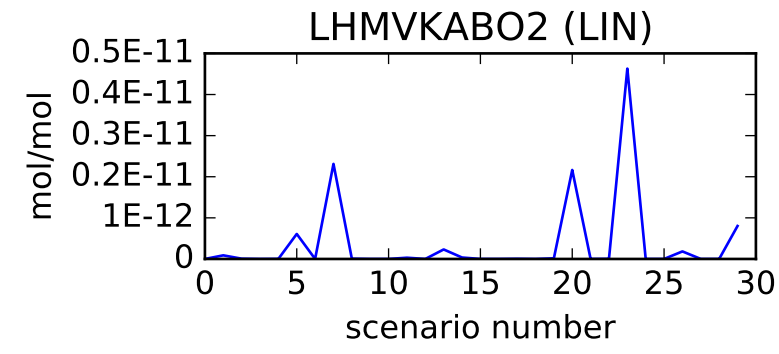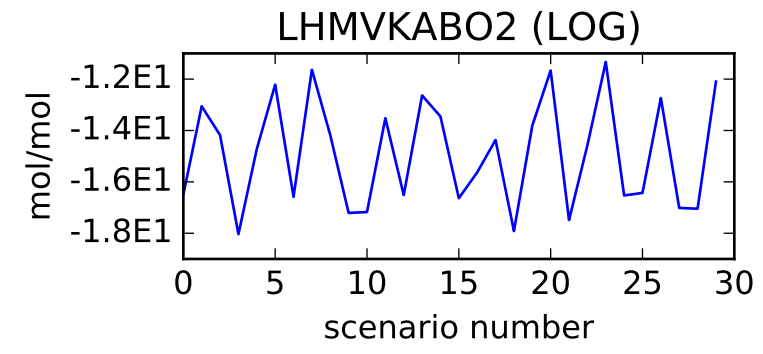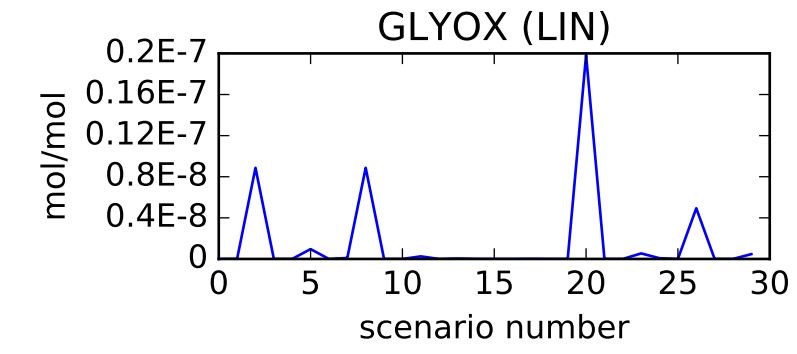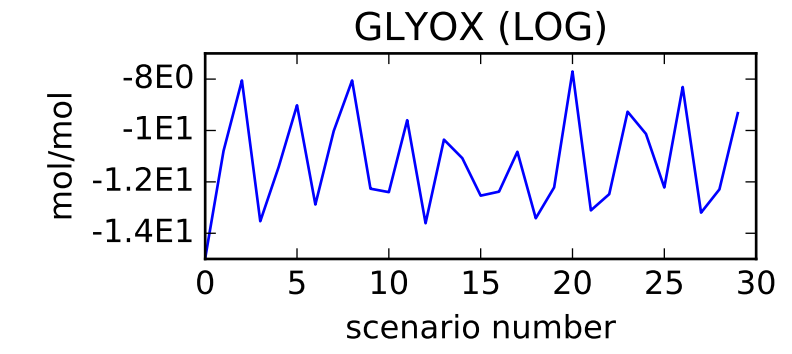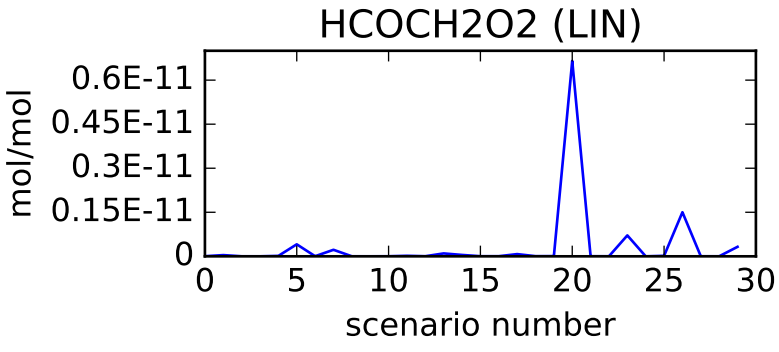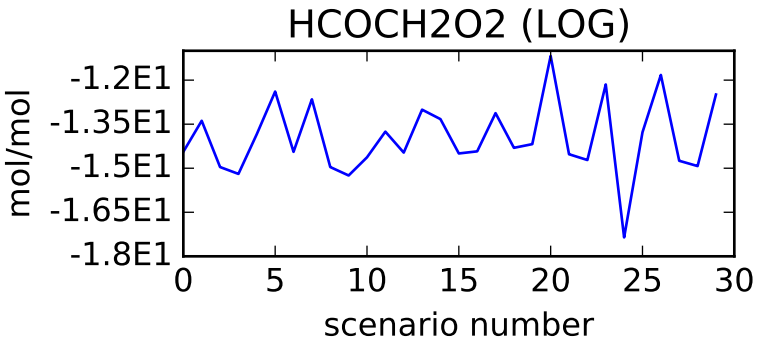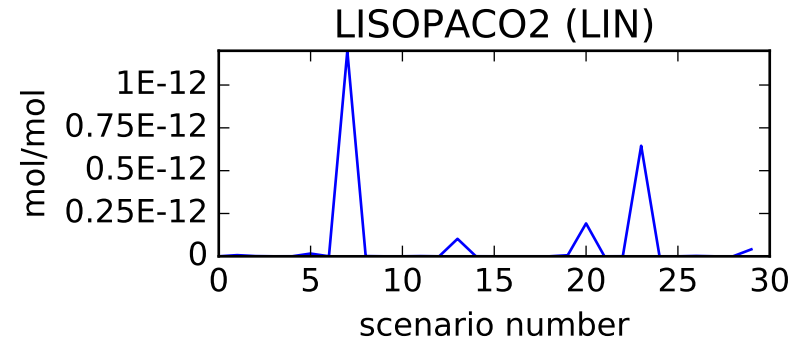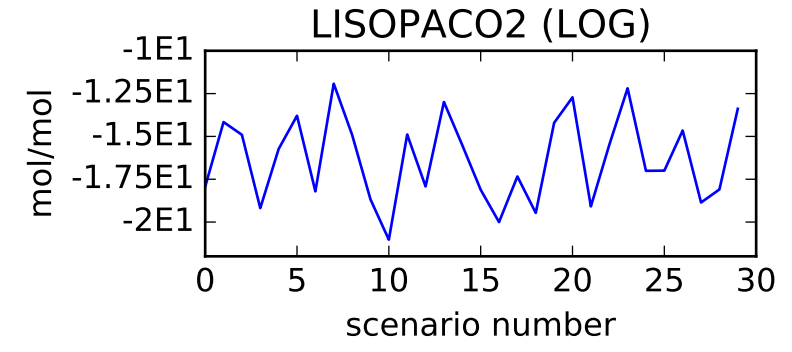

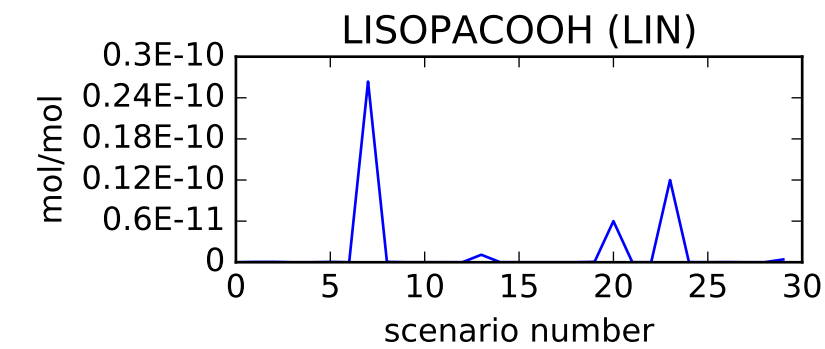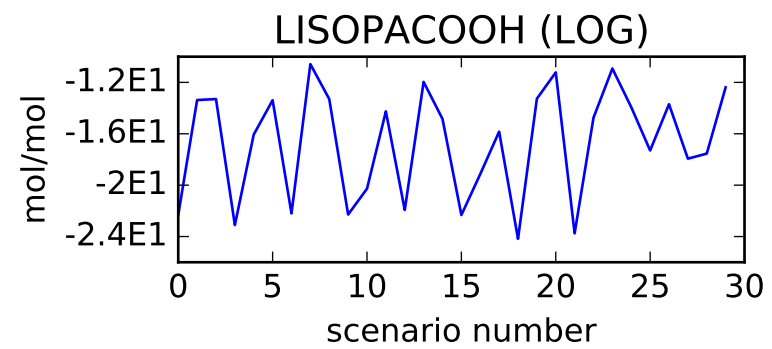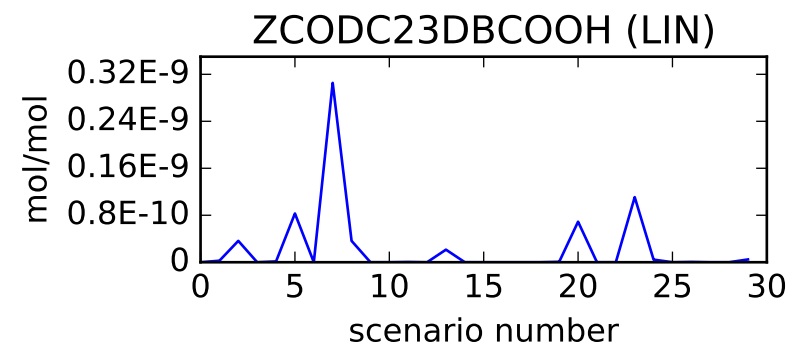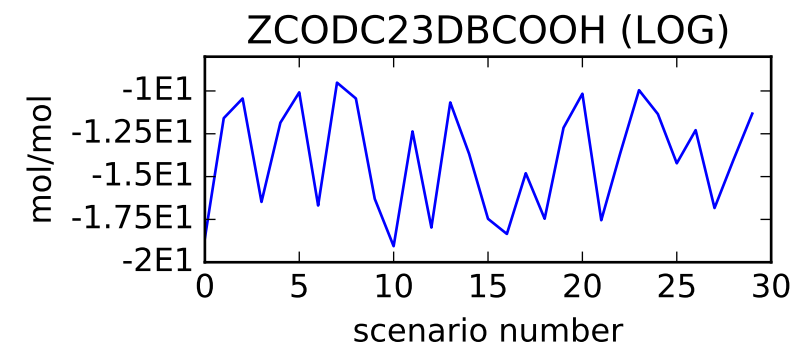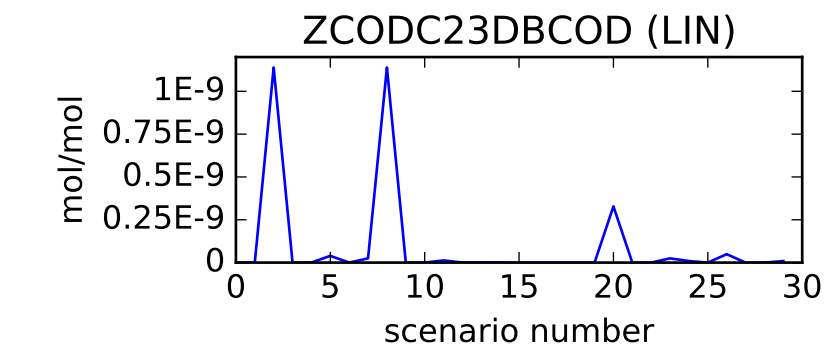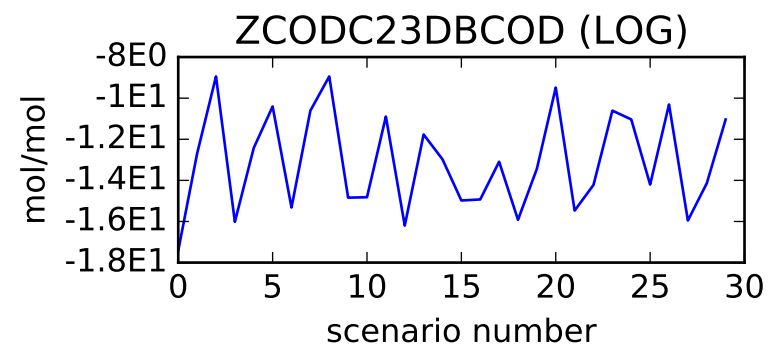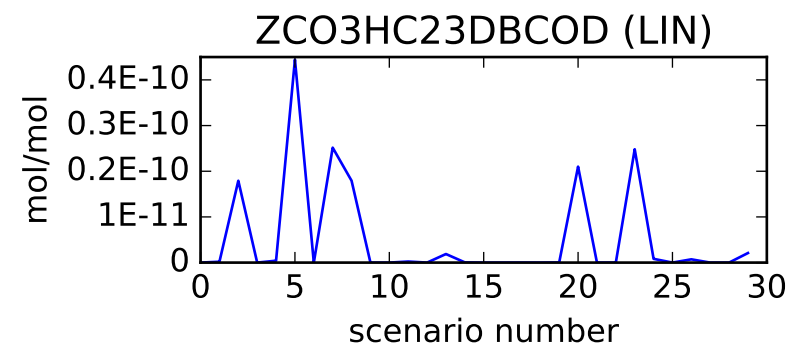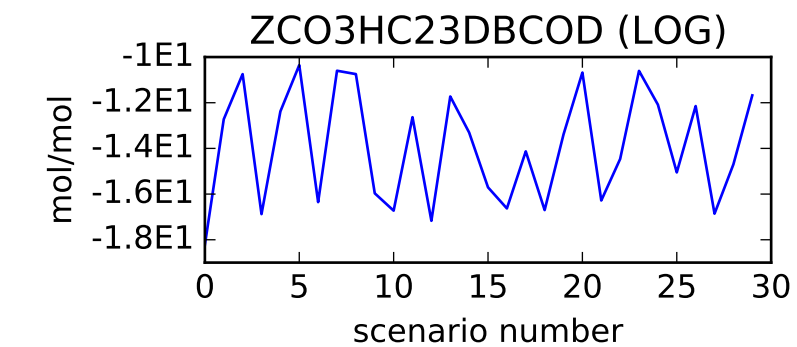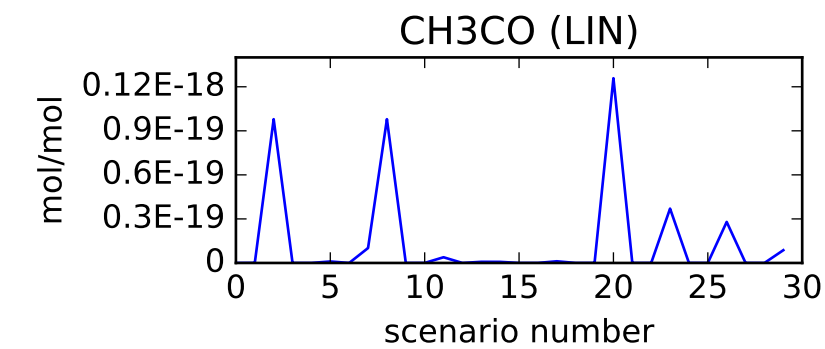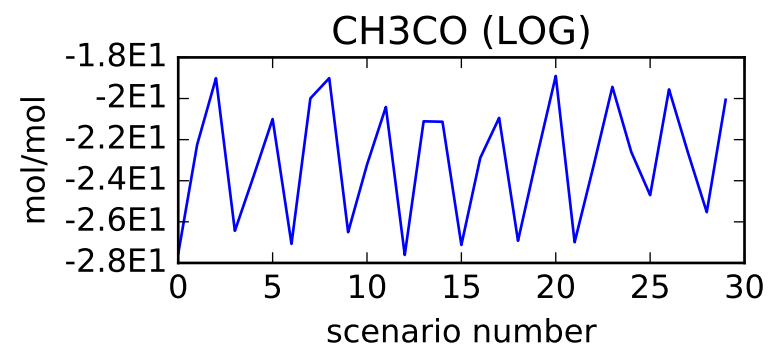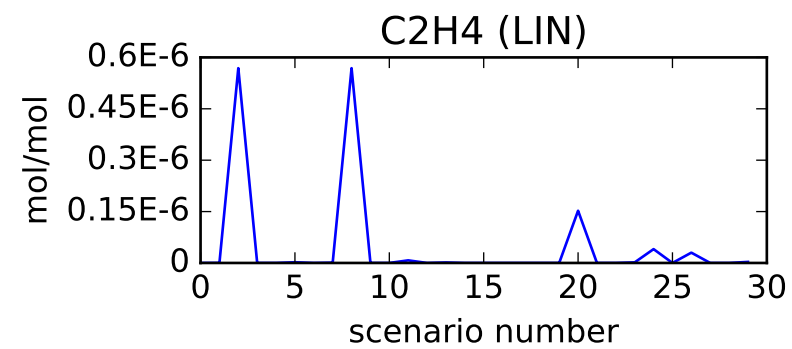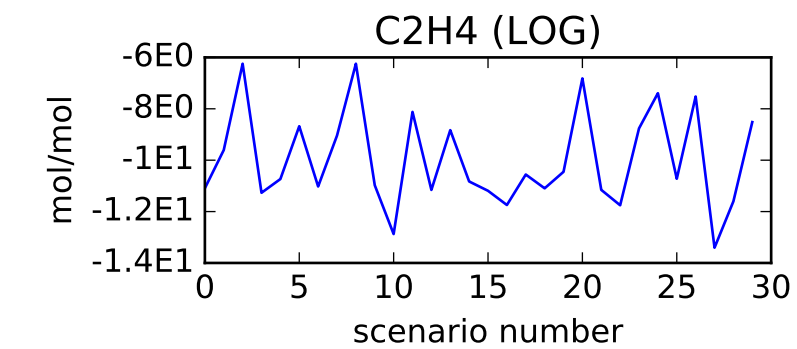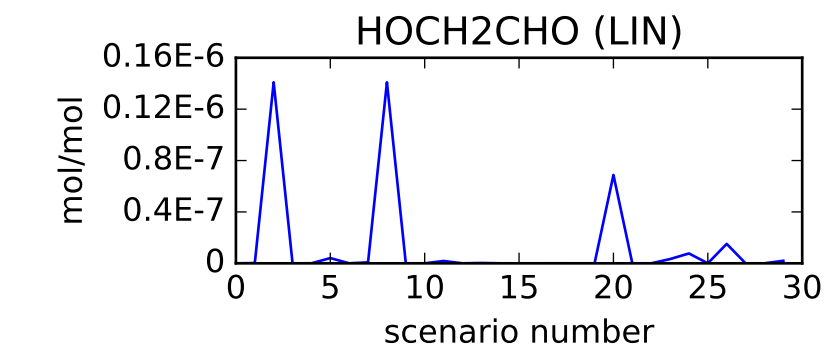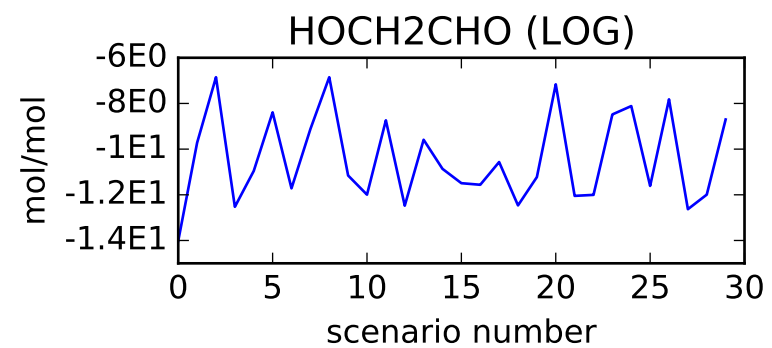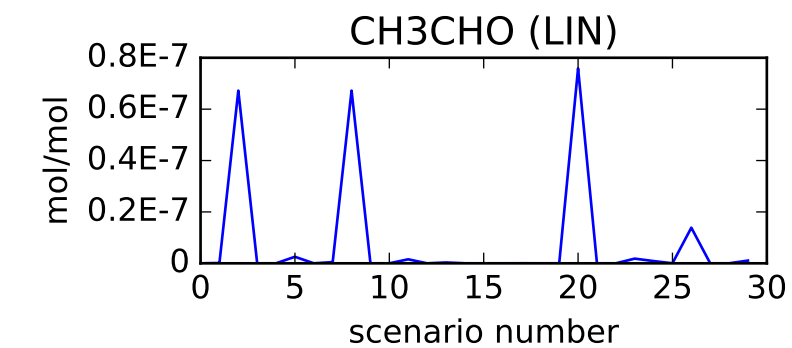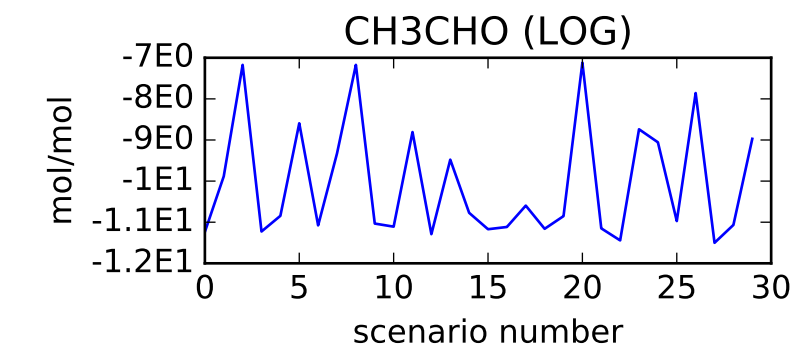



HBr (LIN)

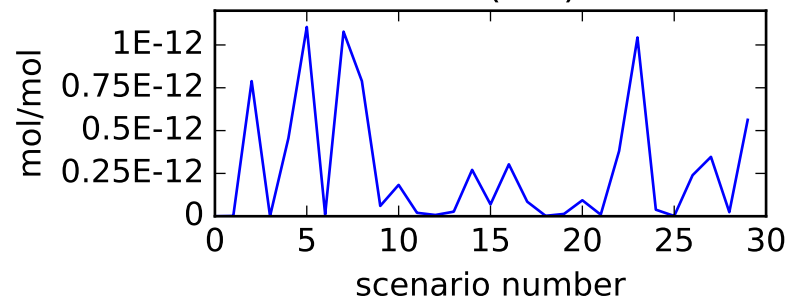

HBr (LOG)

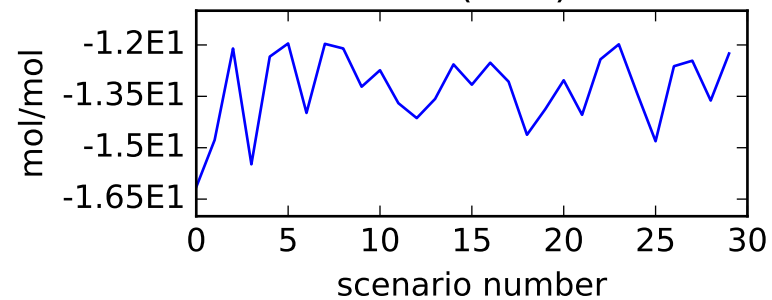

CH3 (LIN)

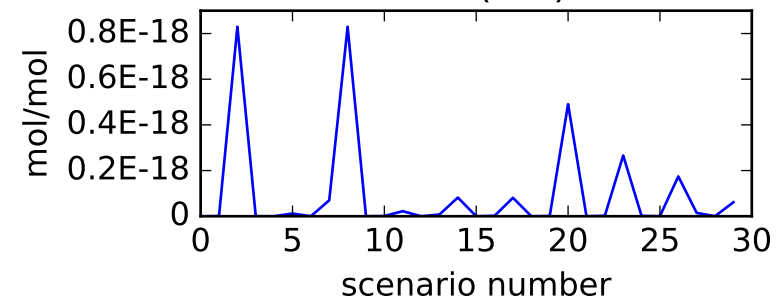

CH3 (LOG)

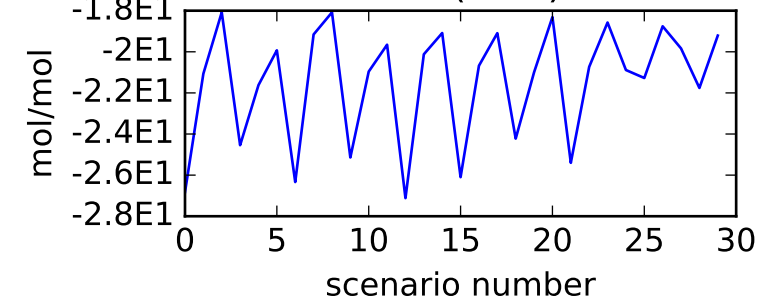

SO2 (LIN)

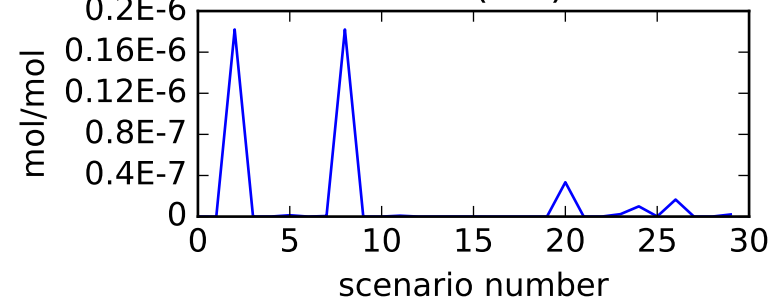

SO2 (LOG)

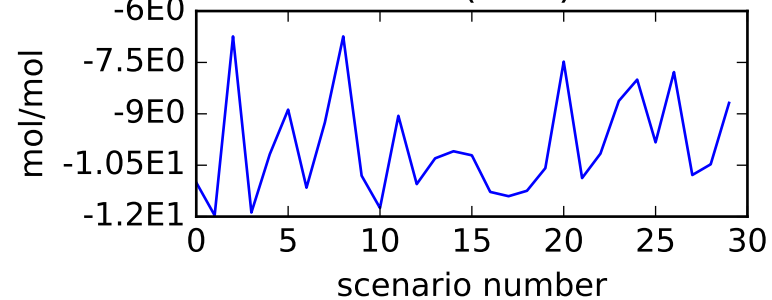

CH3O (LIN)

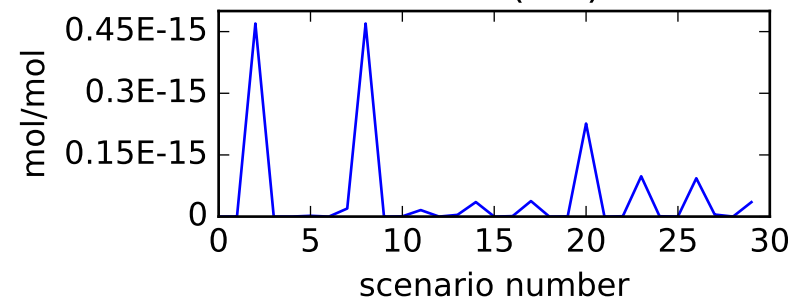

CH3O (LOG)

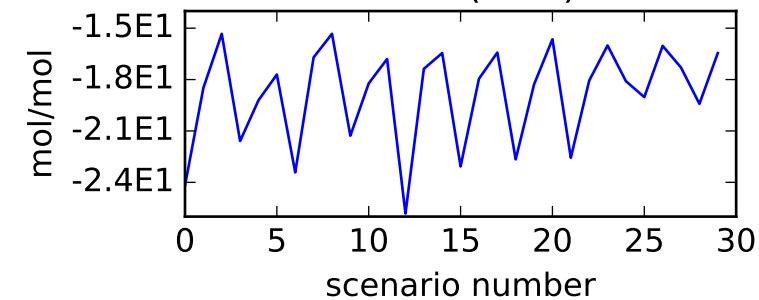

ClO (LIN)

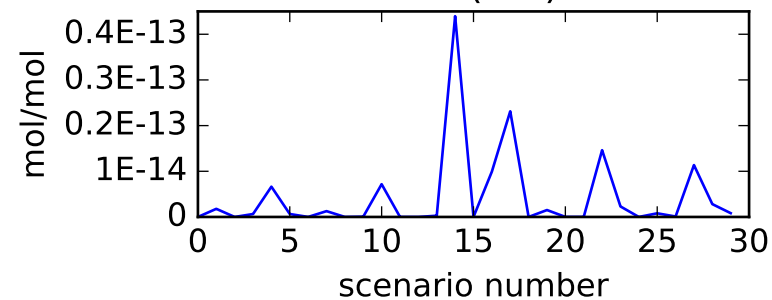

ClO (LOG)

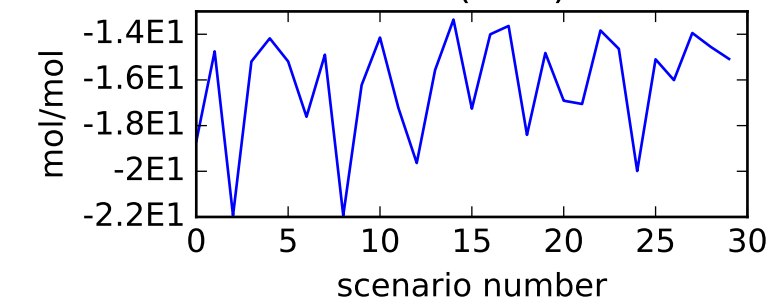

CH2OO (LIN)

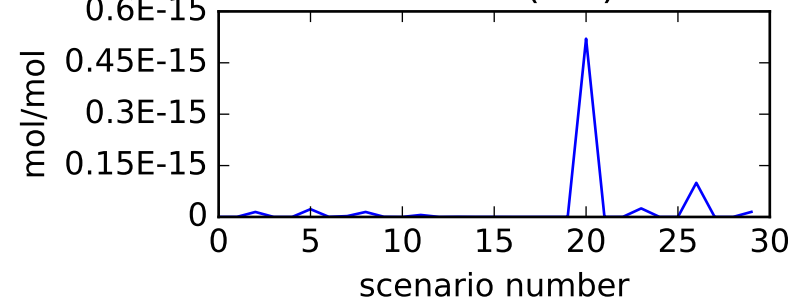

CH2OO (LOG)

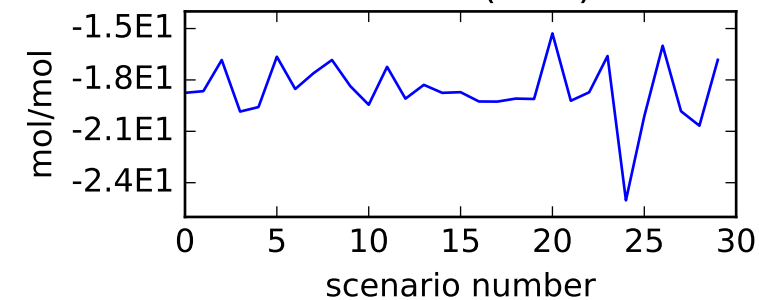

CO (LIN)

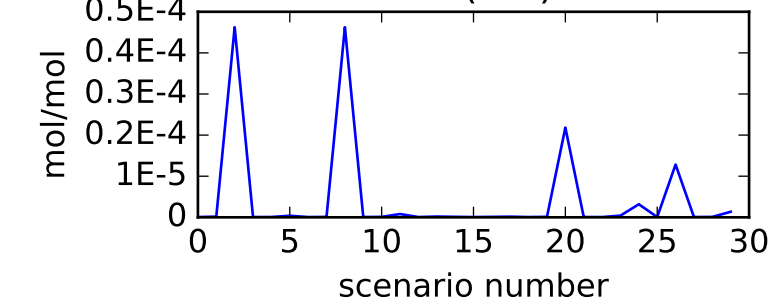

CO (LOG)

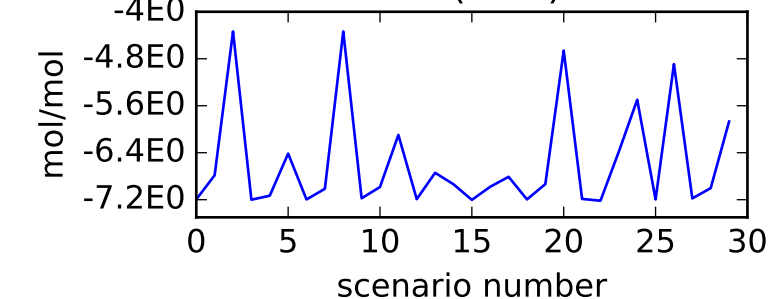

HCl (LIN)

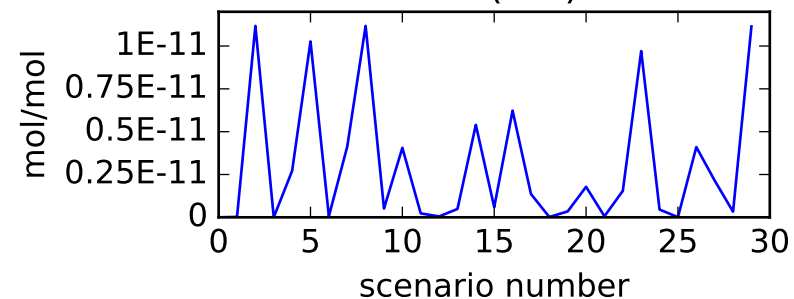

HCl (LOG)

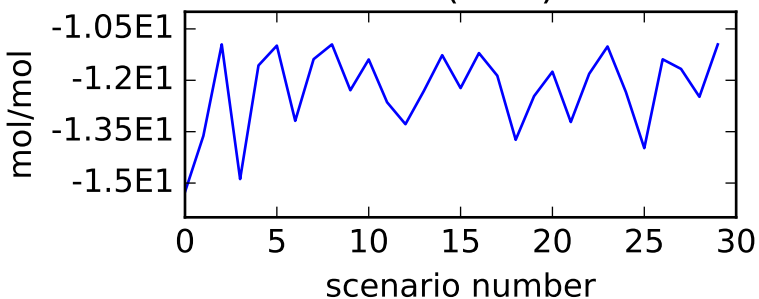

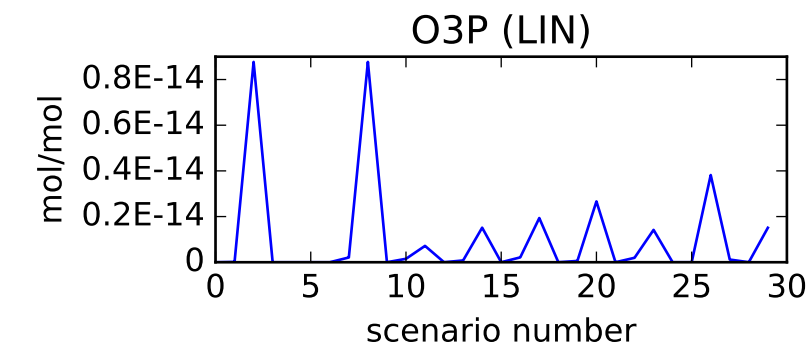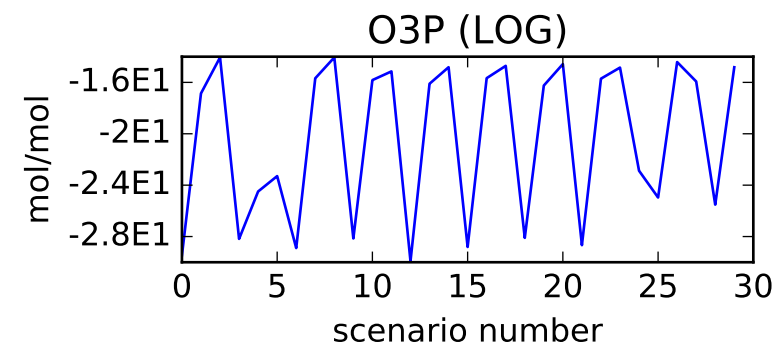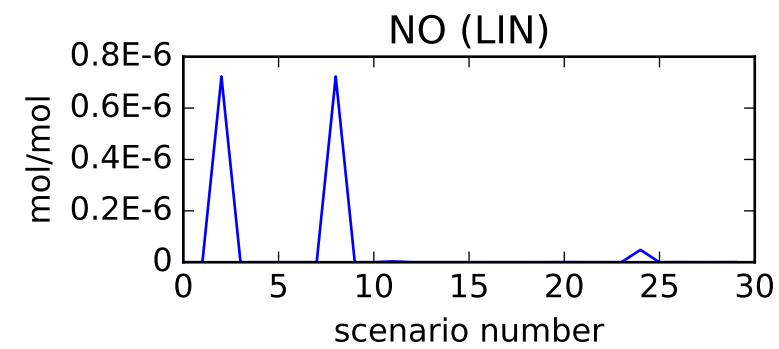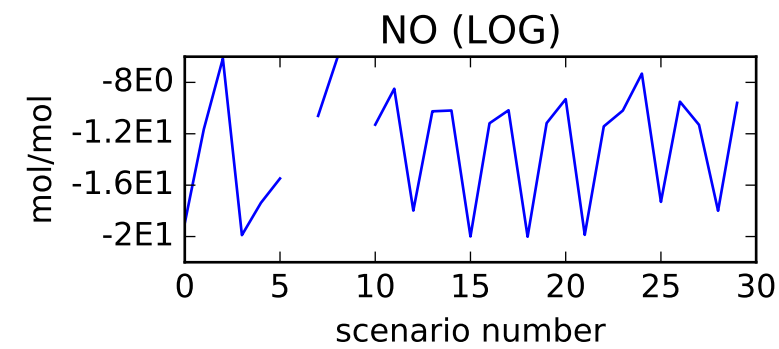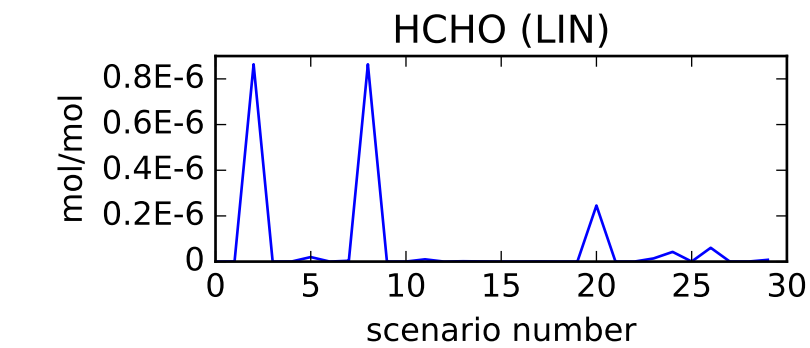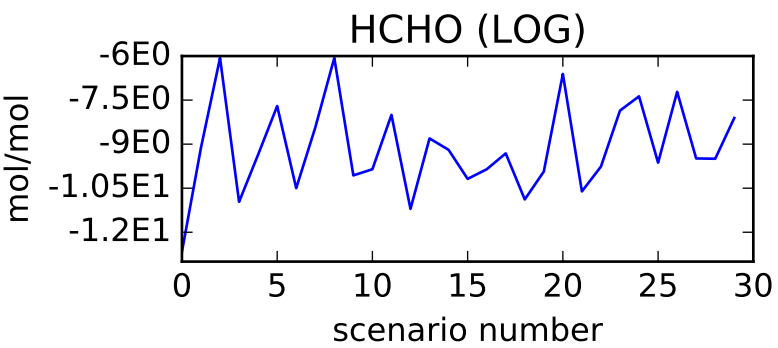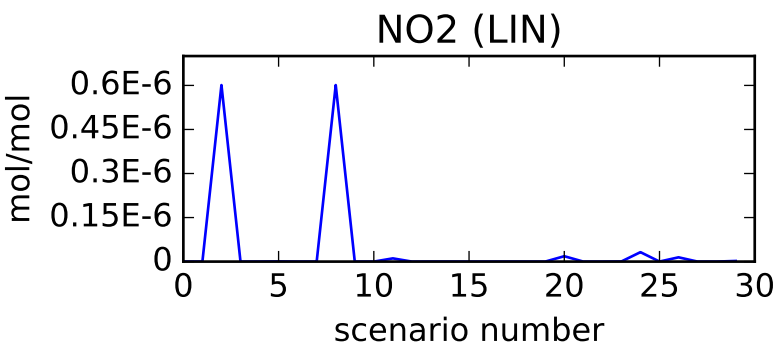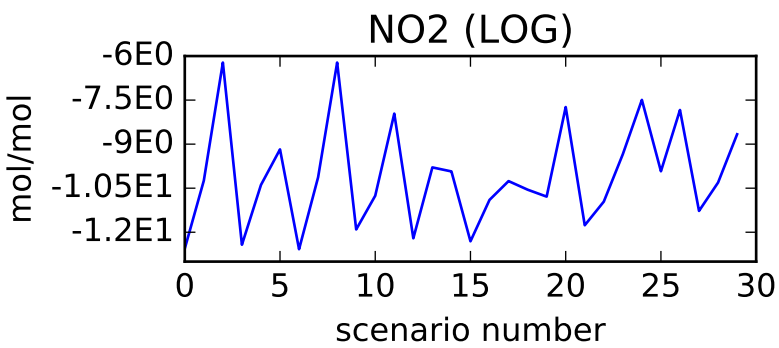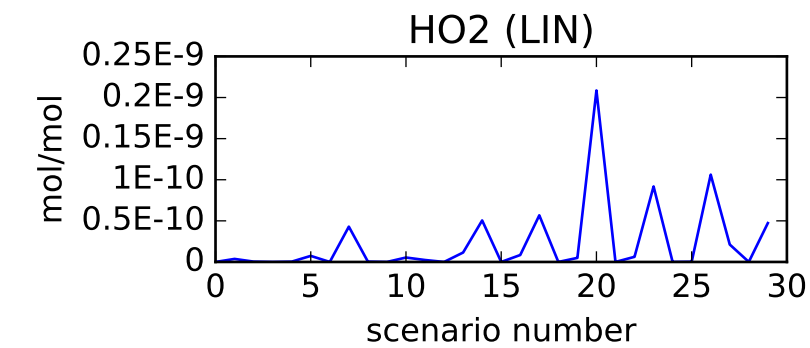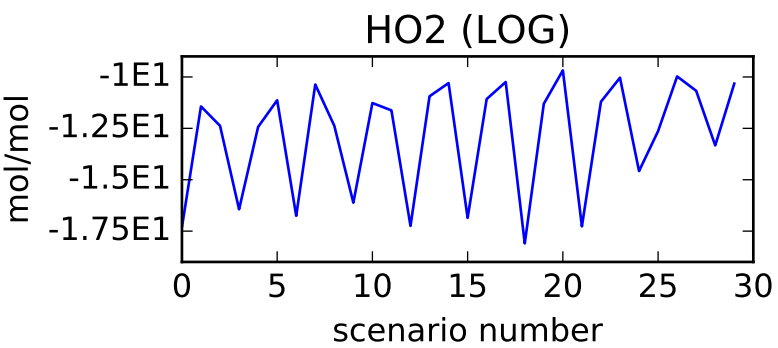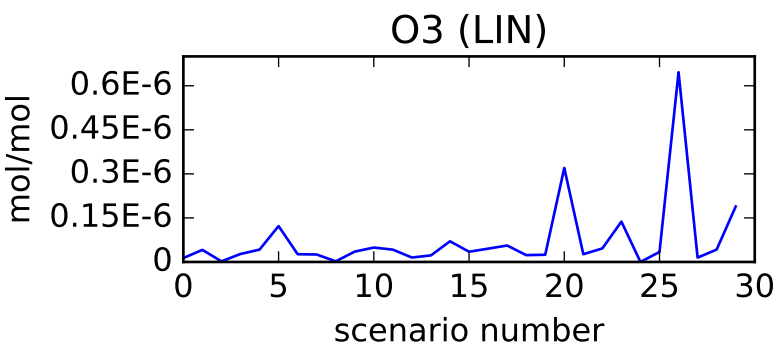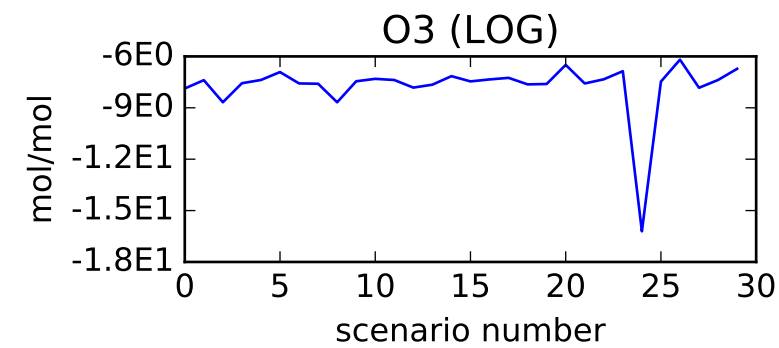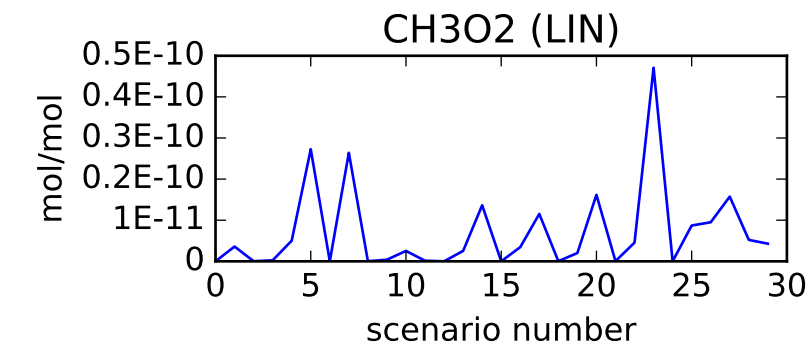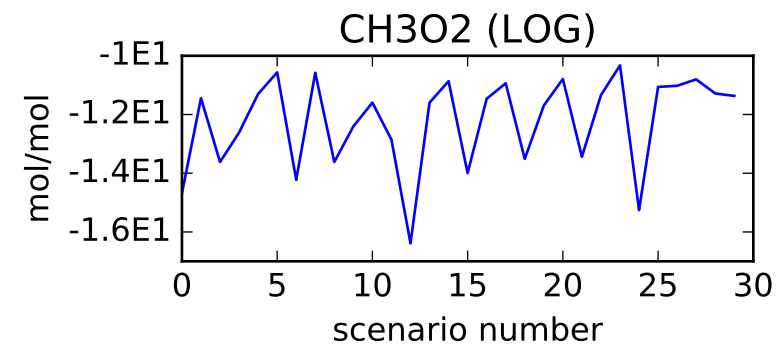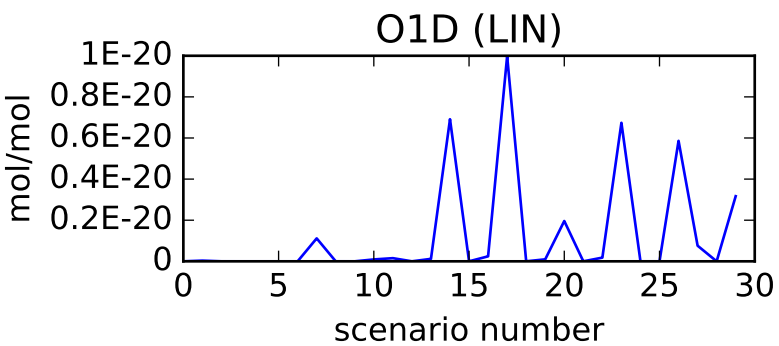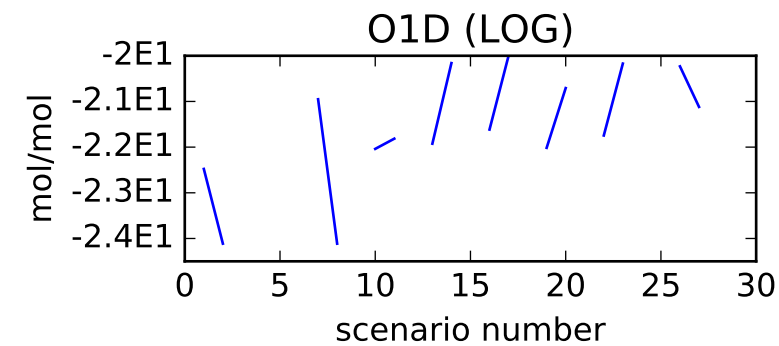

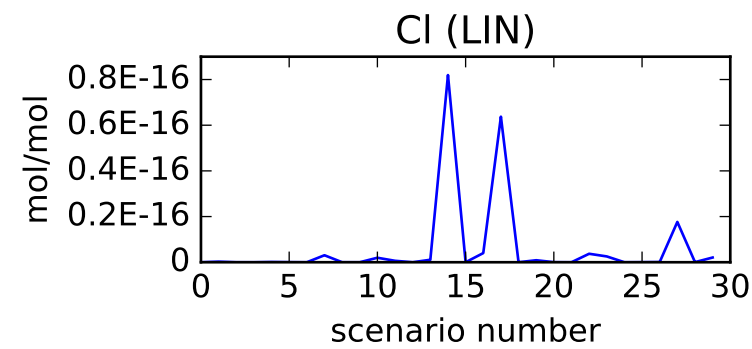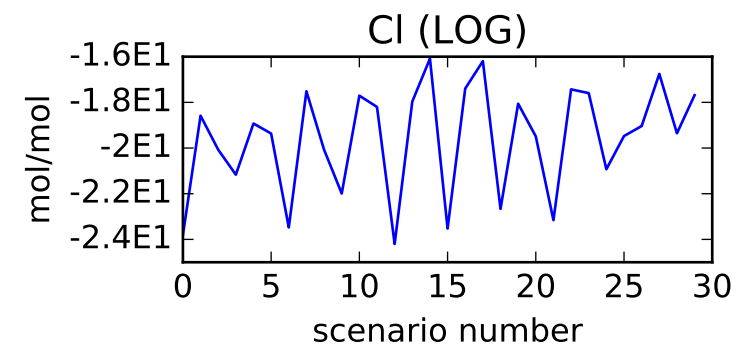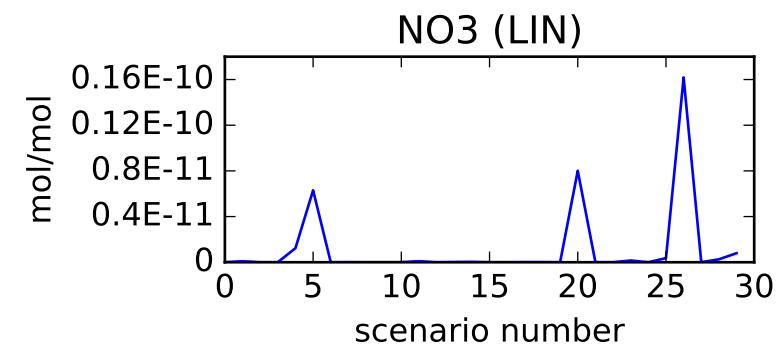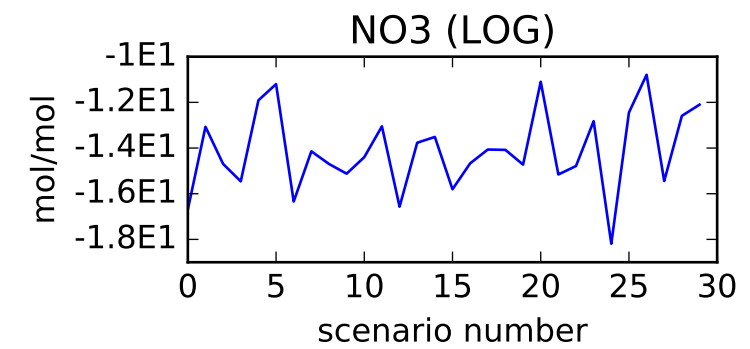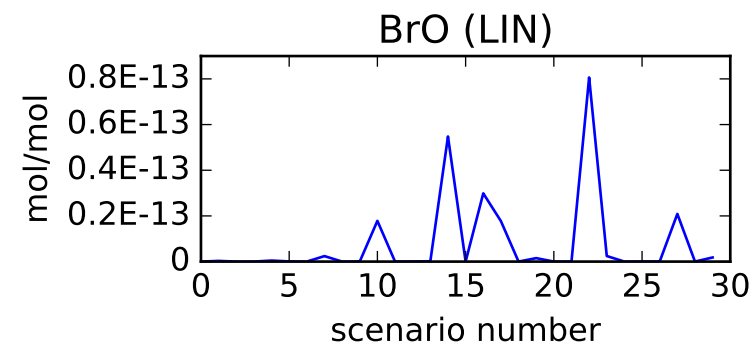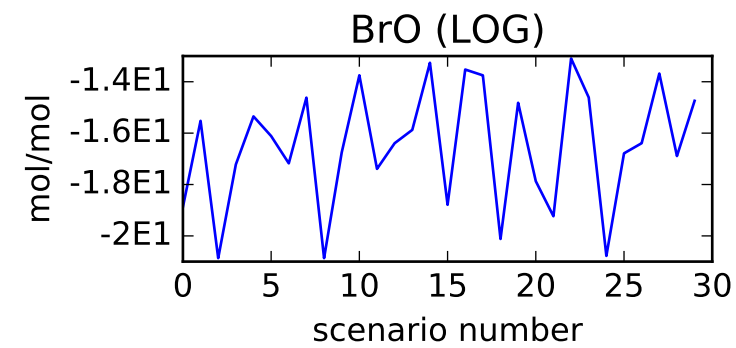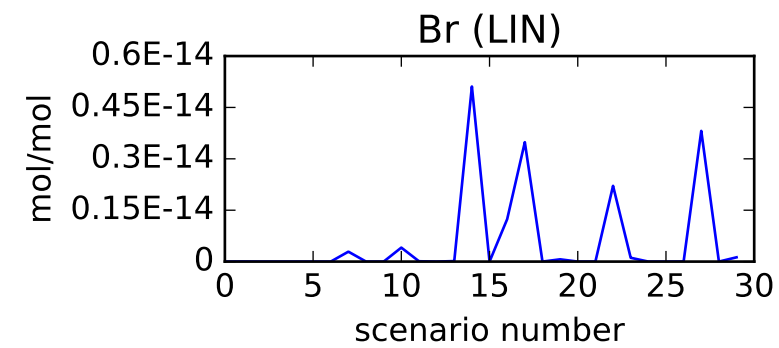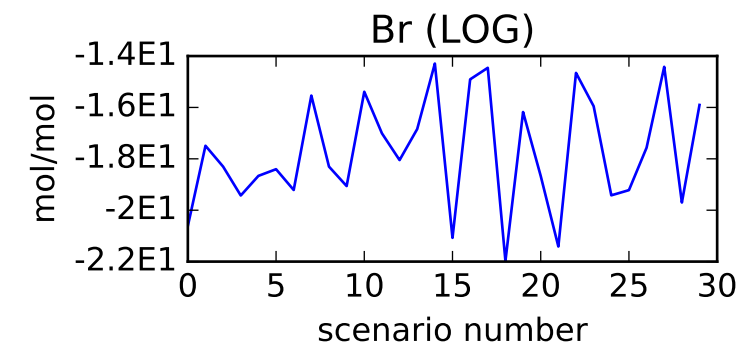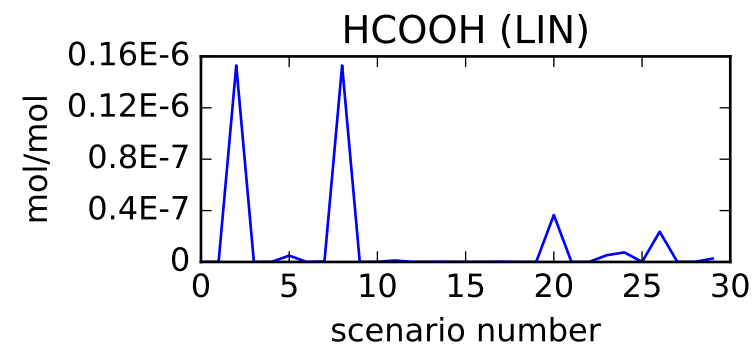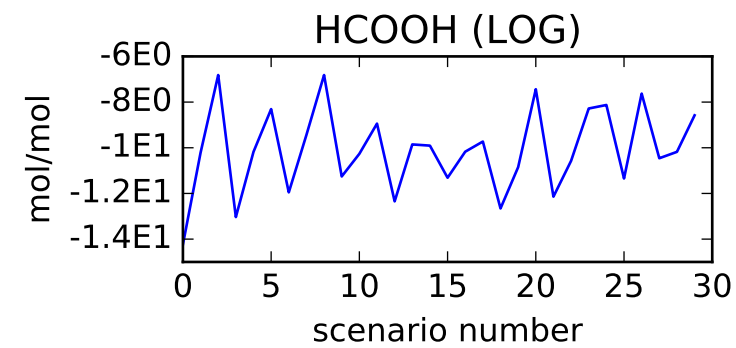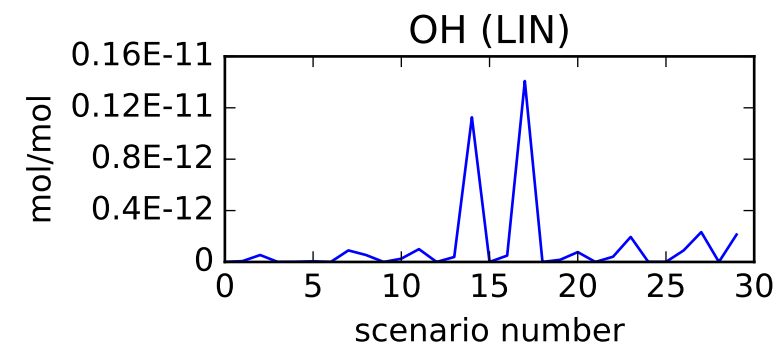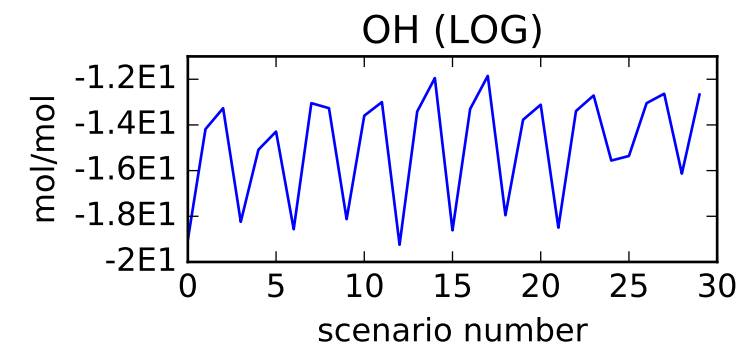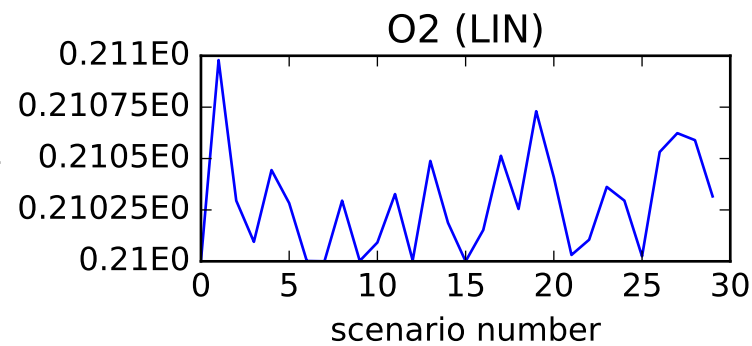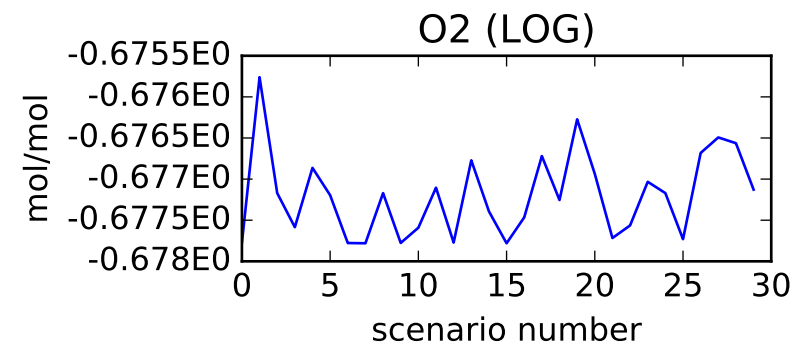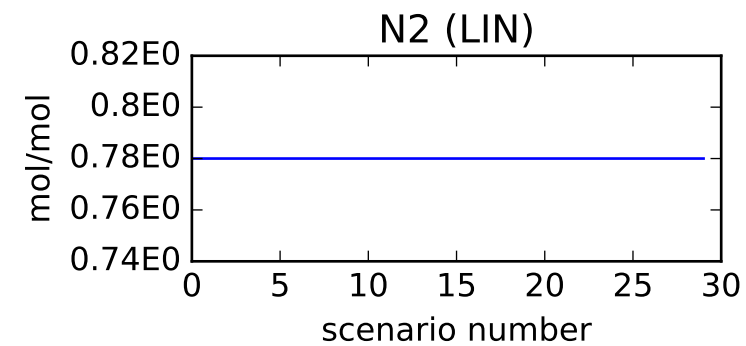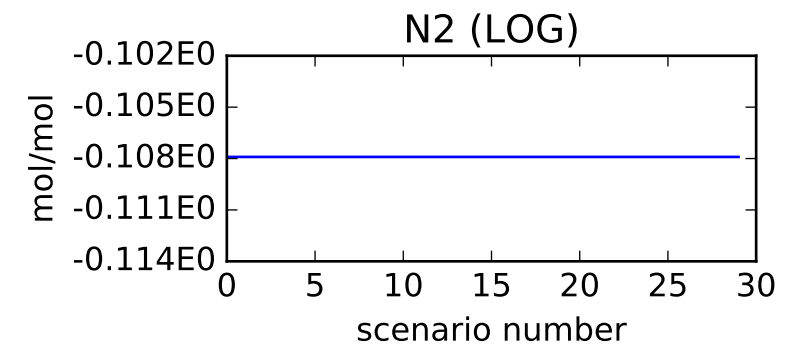

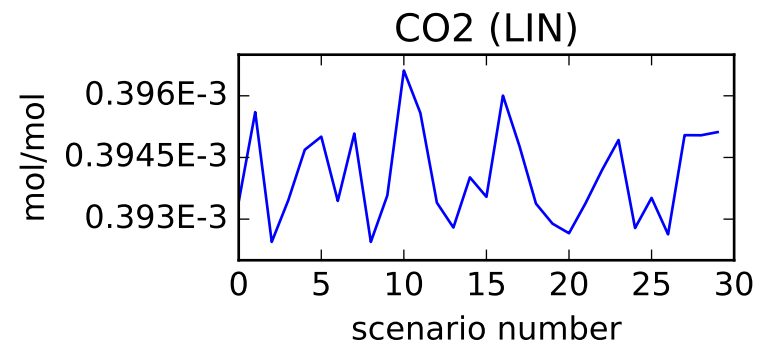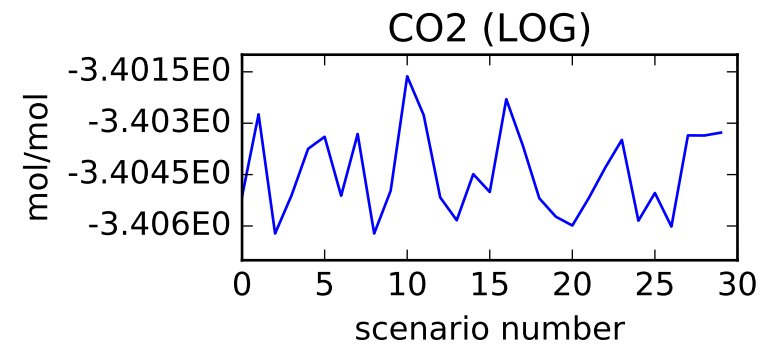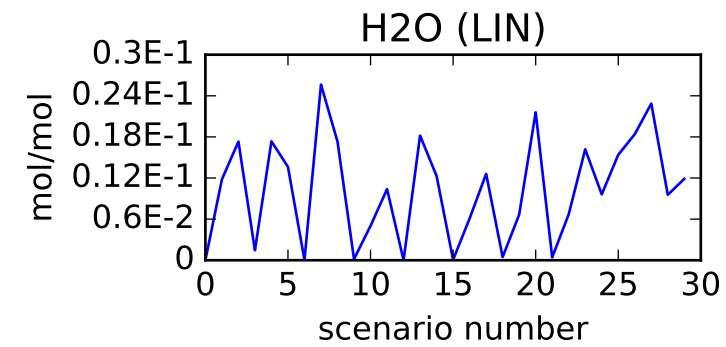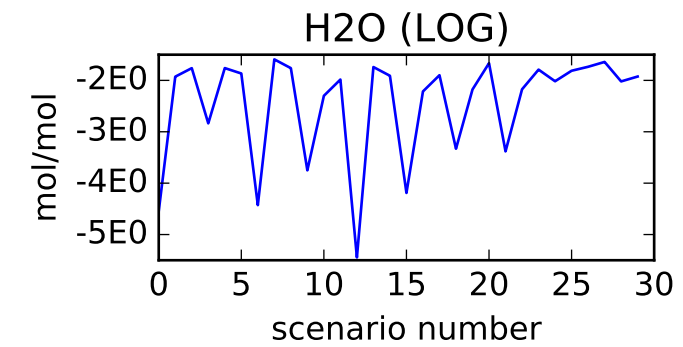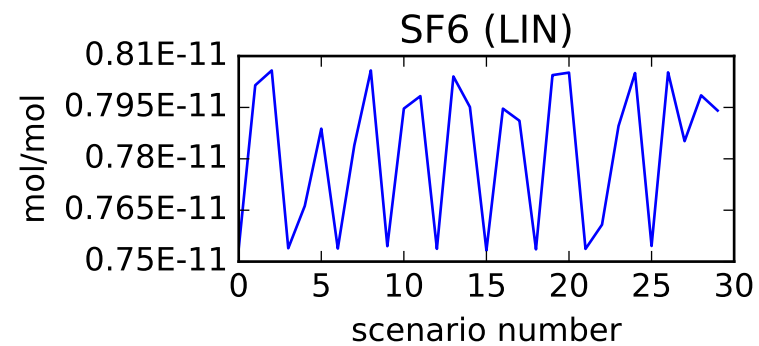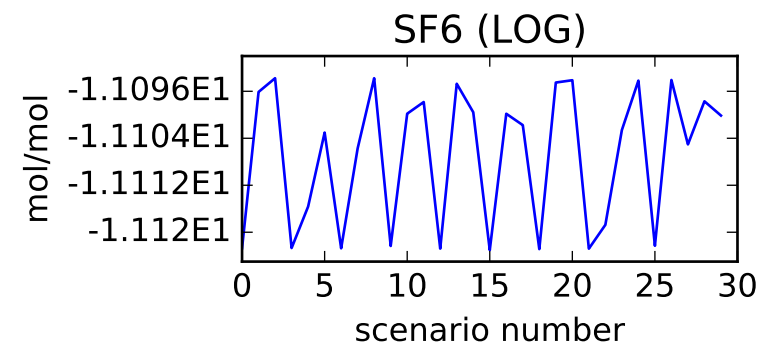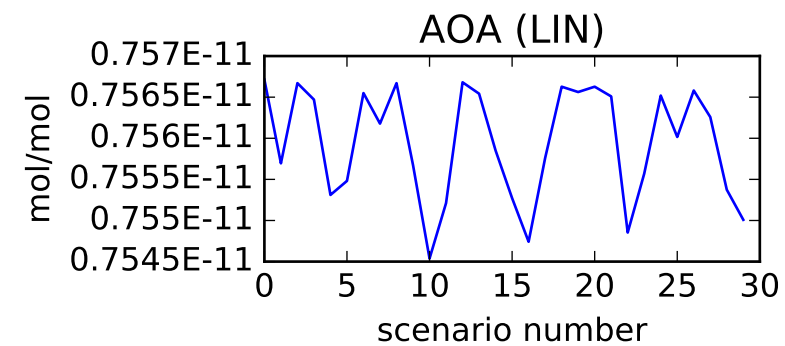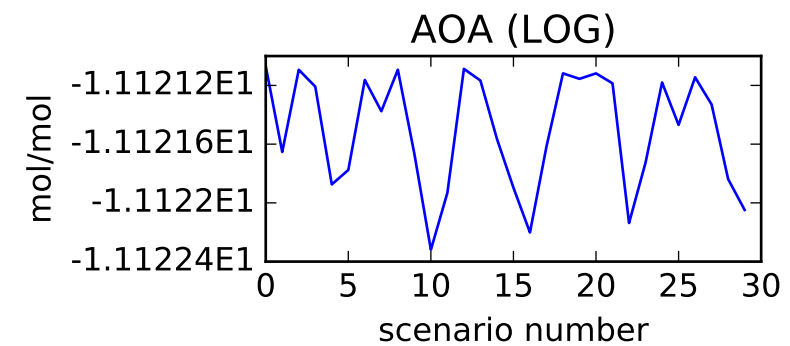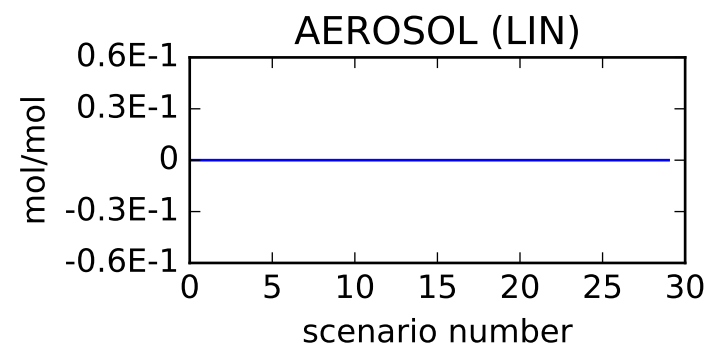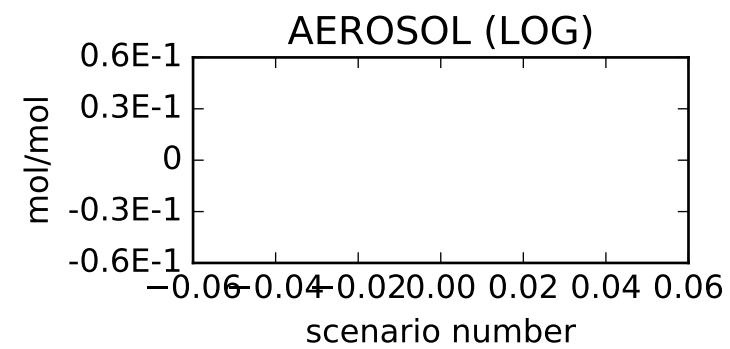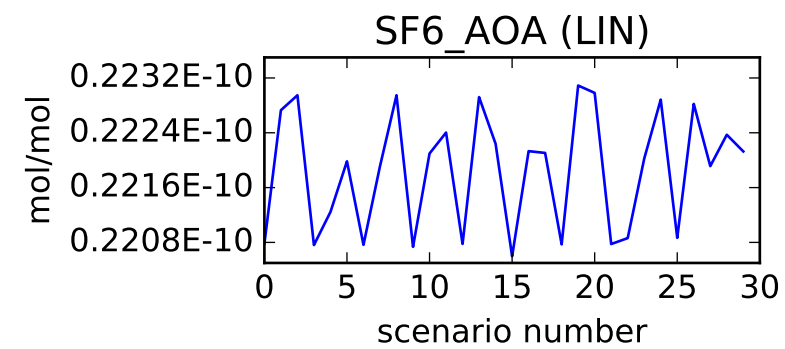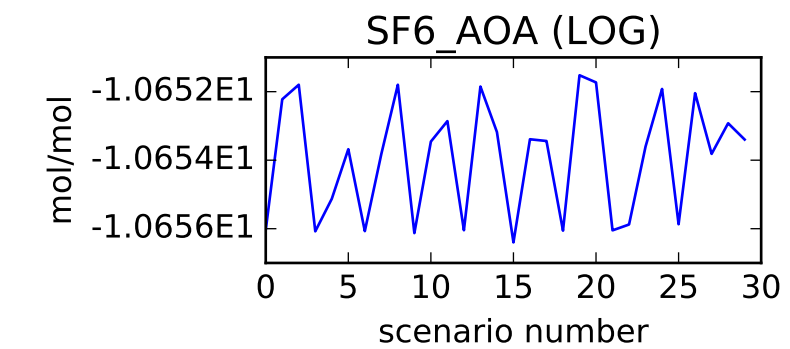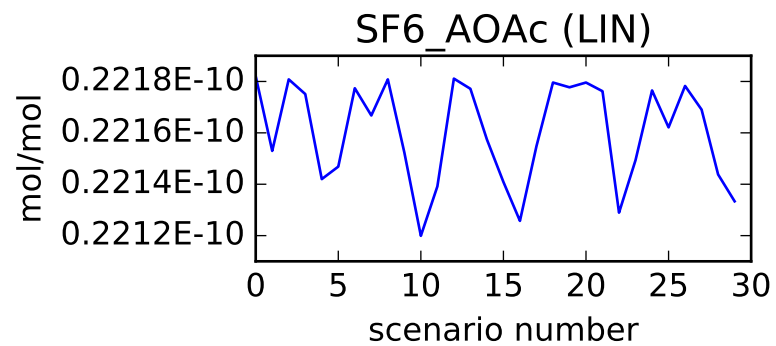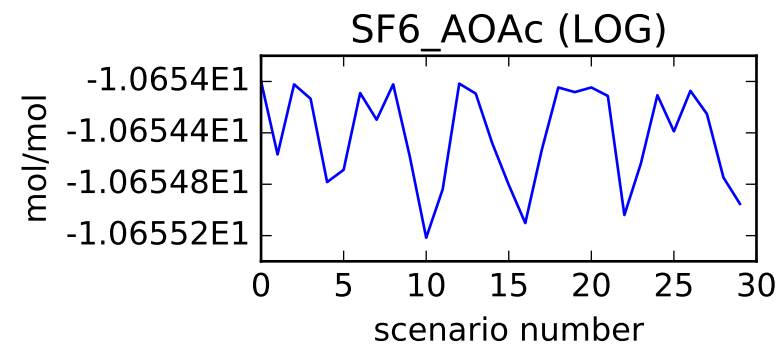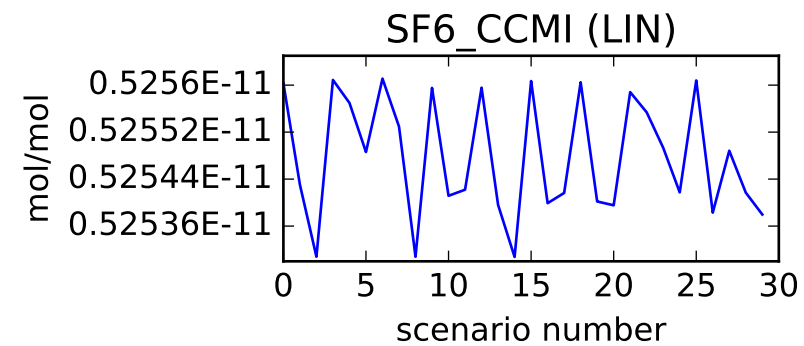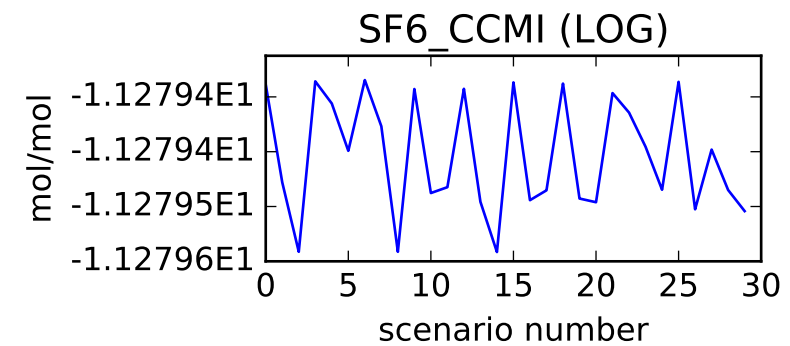

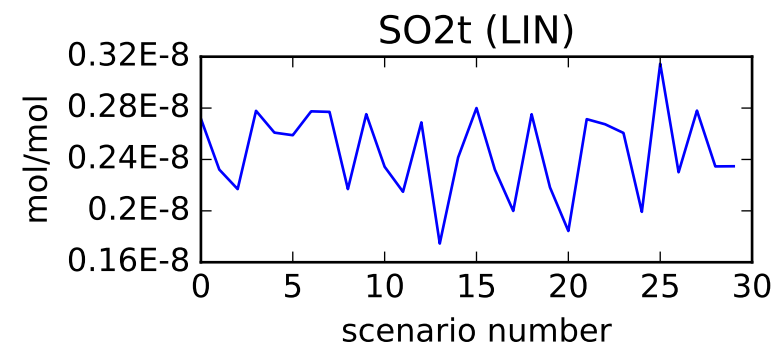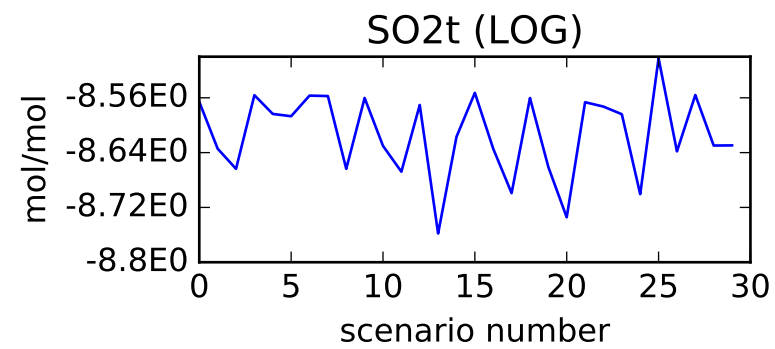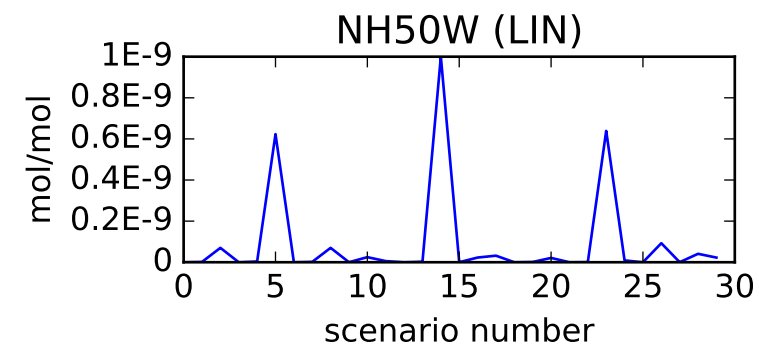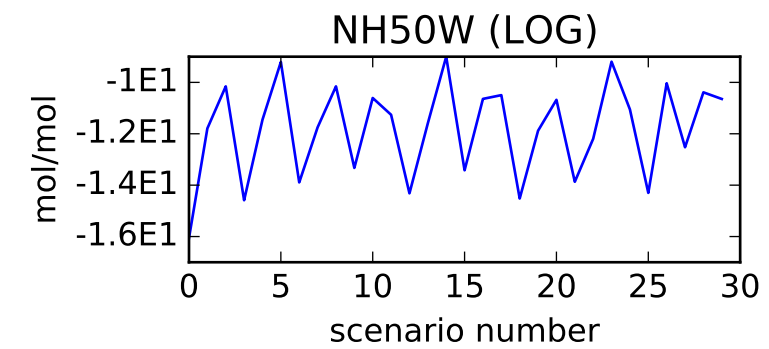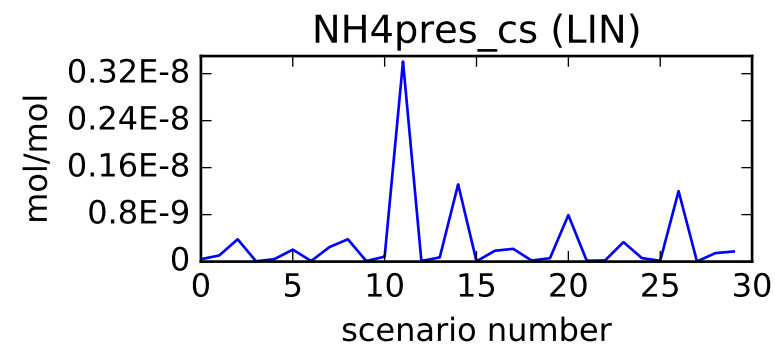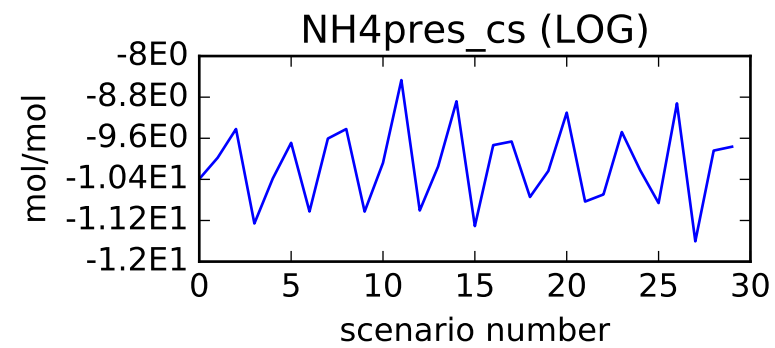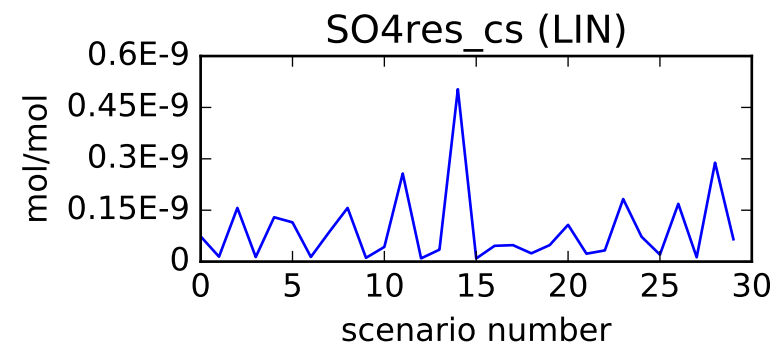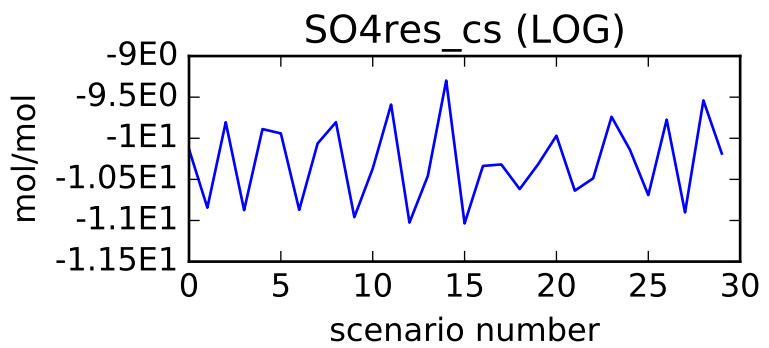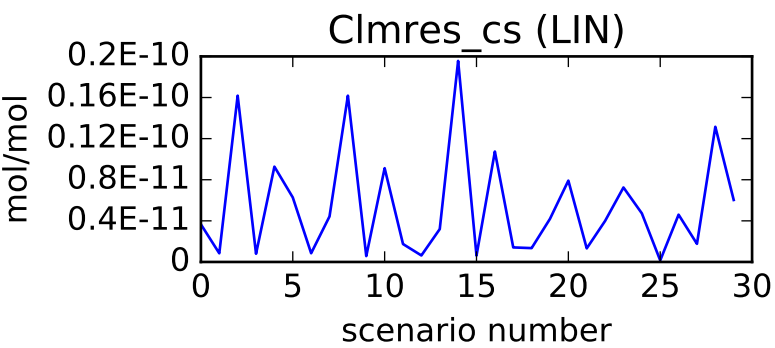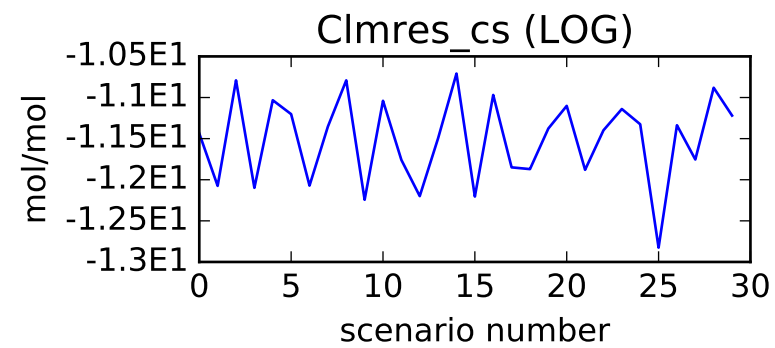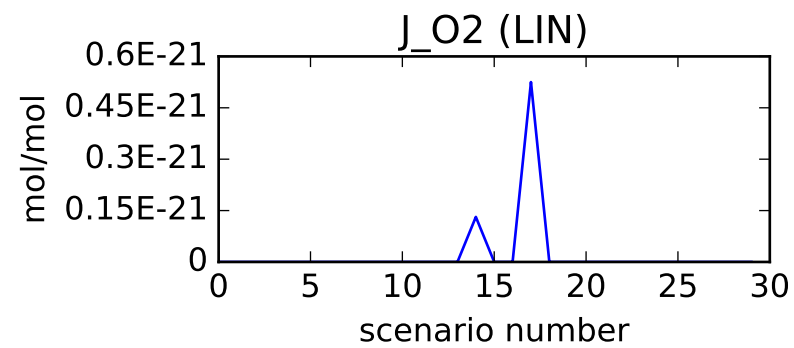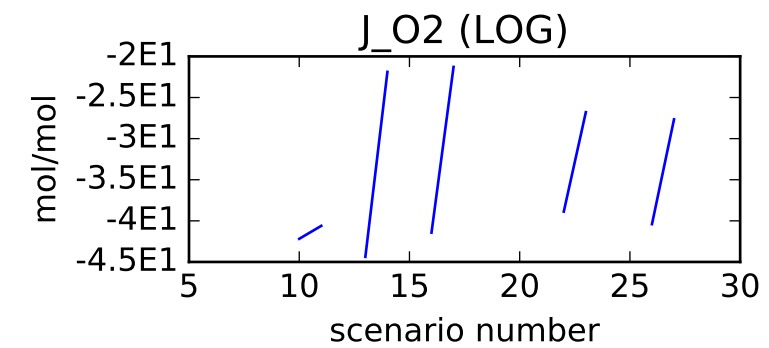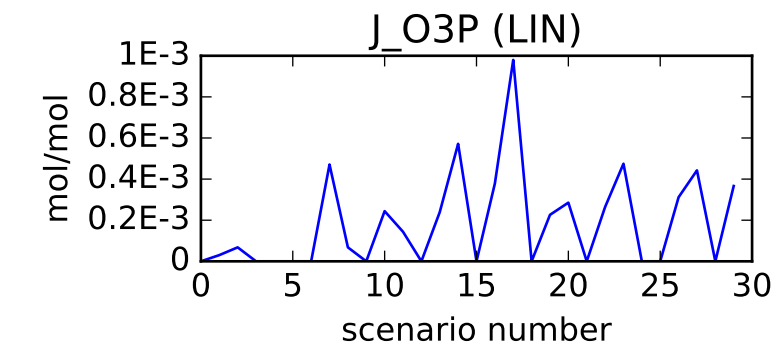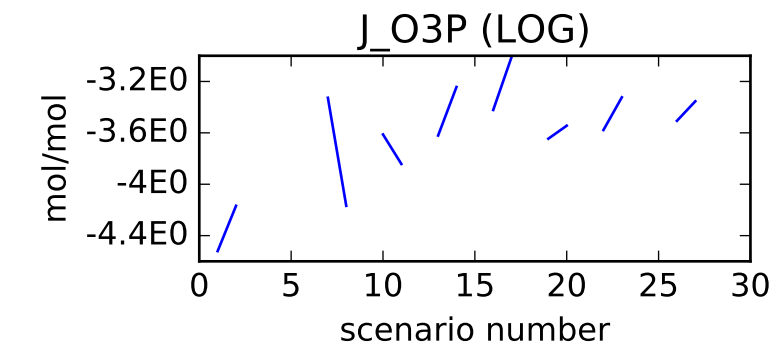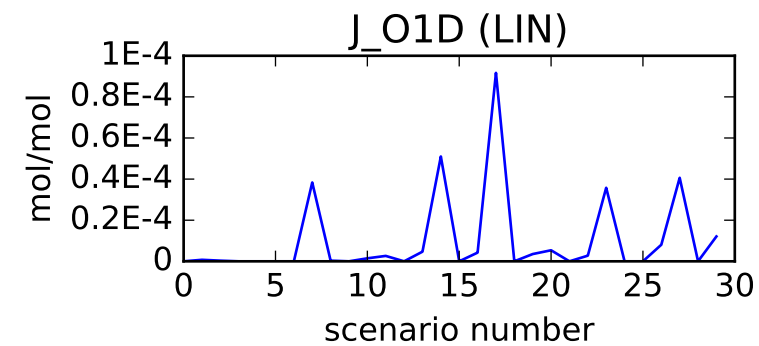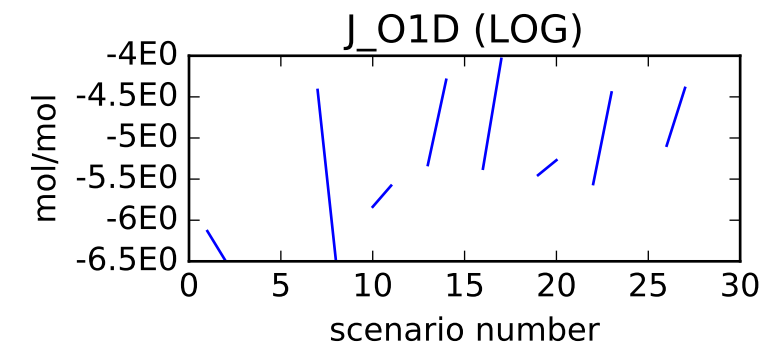

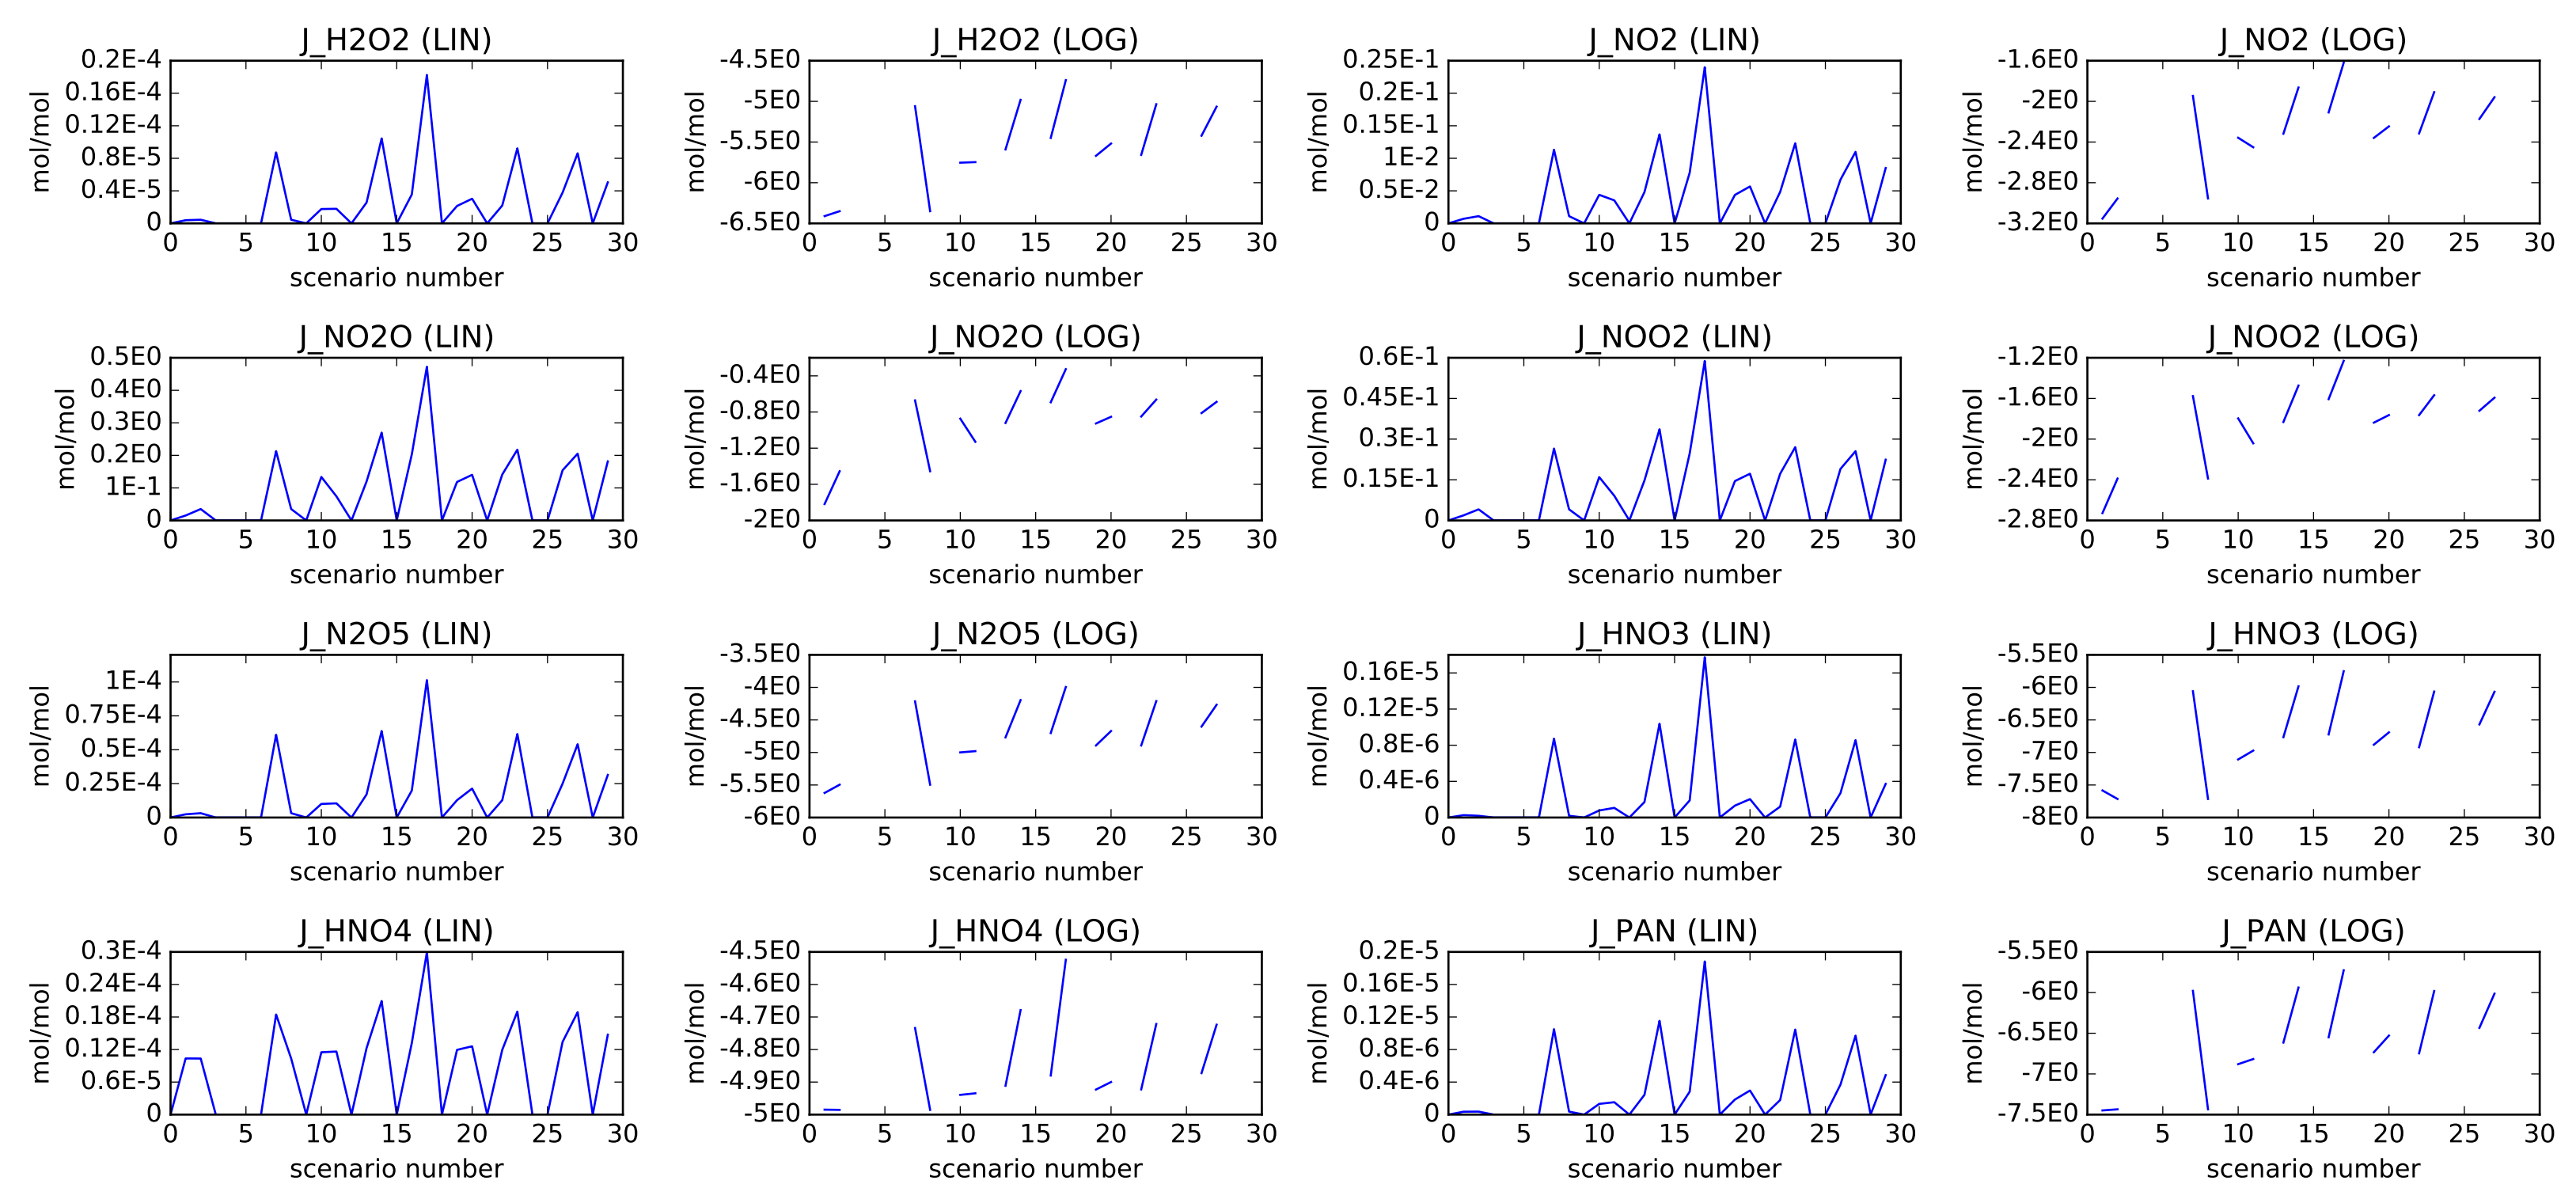



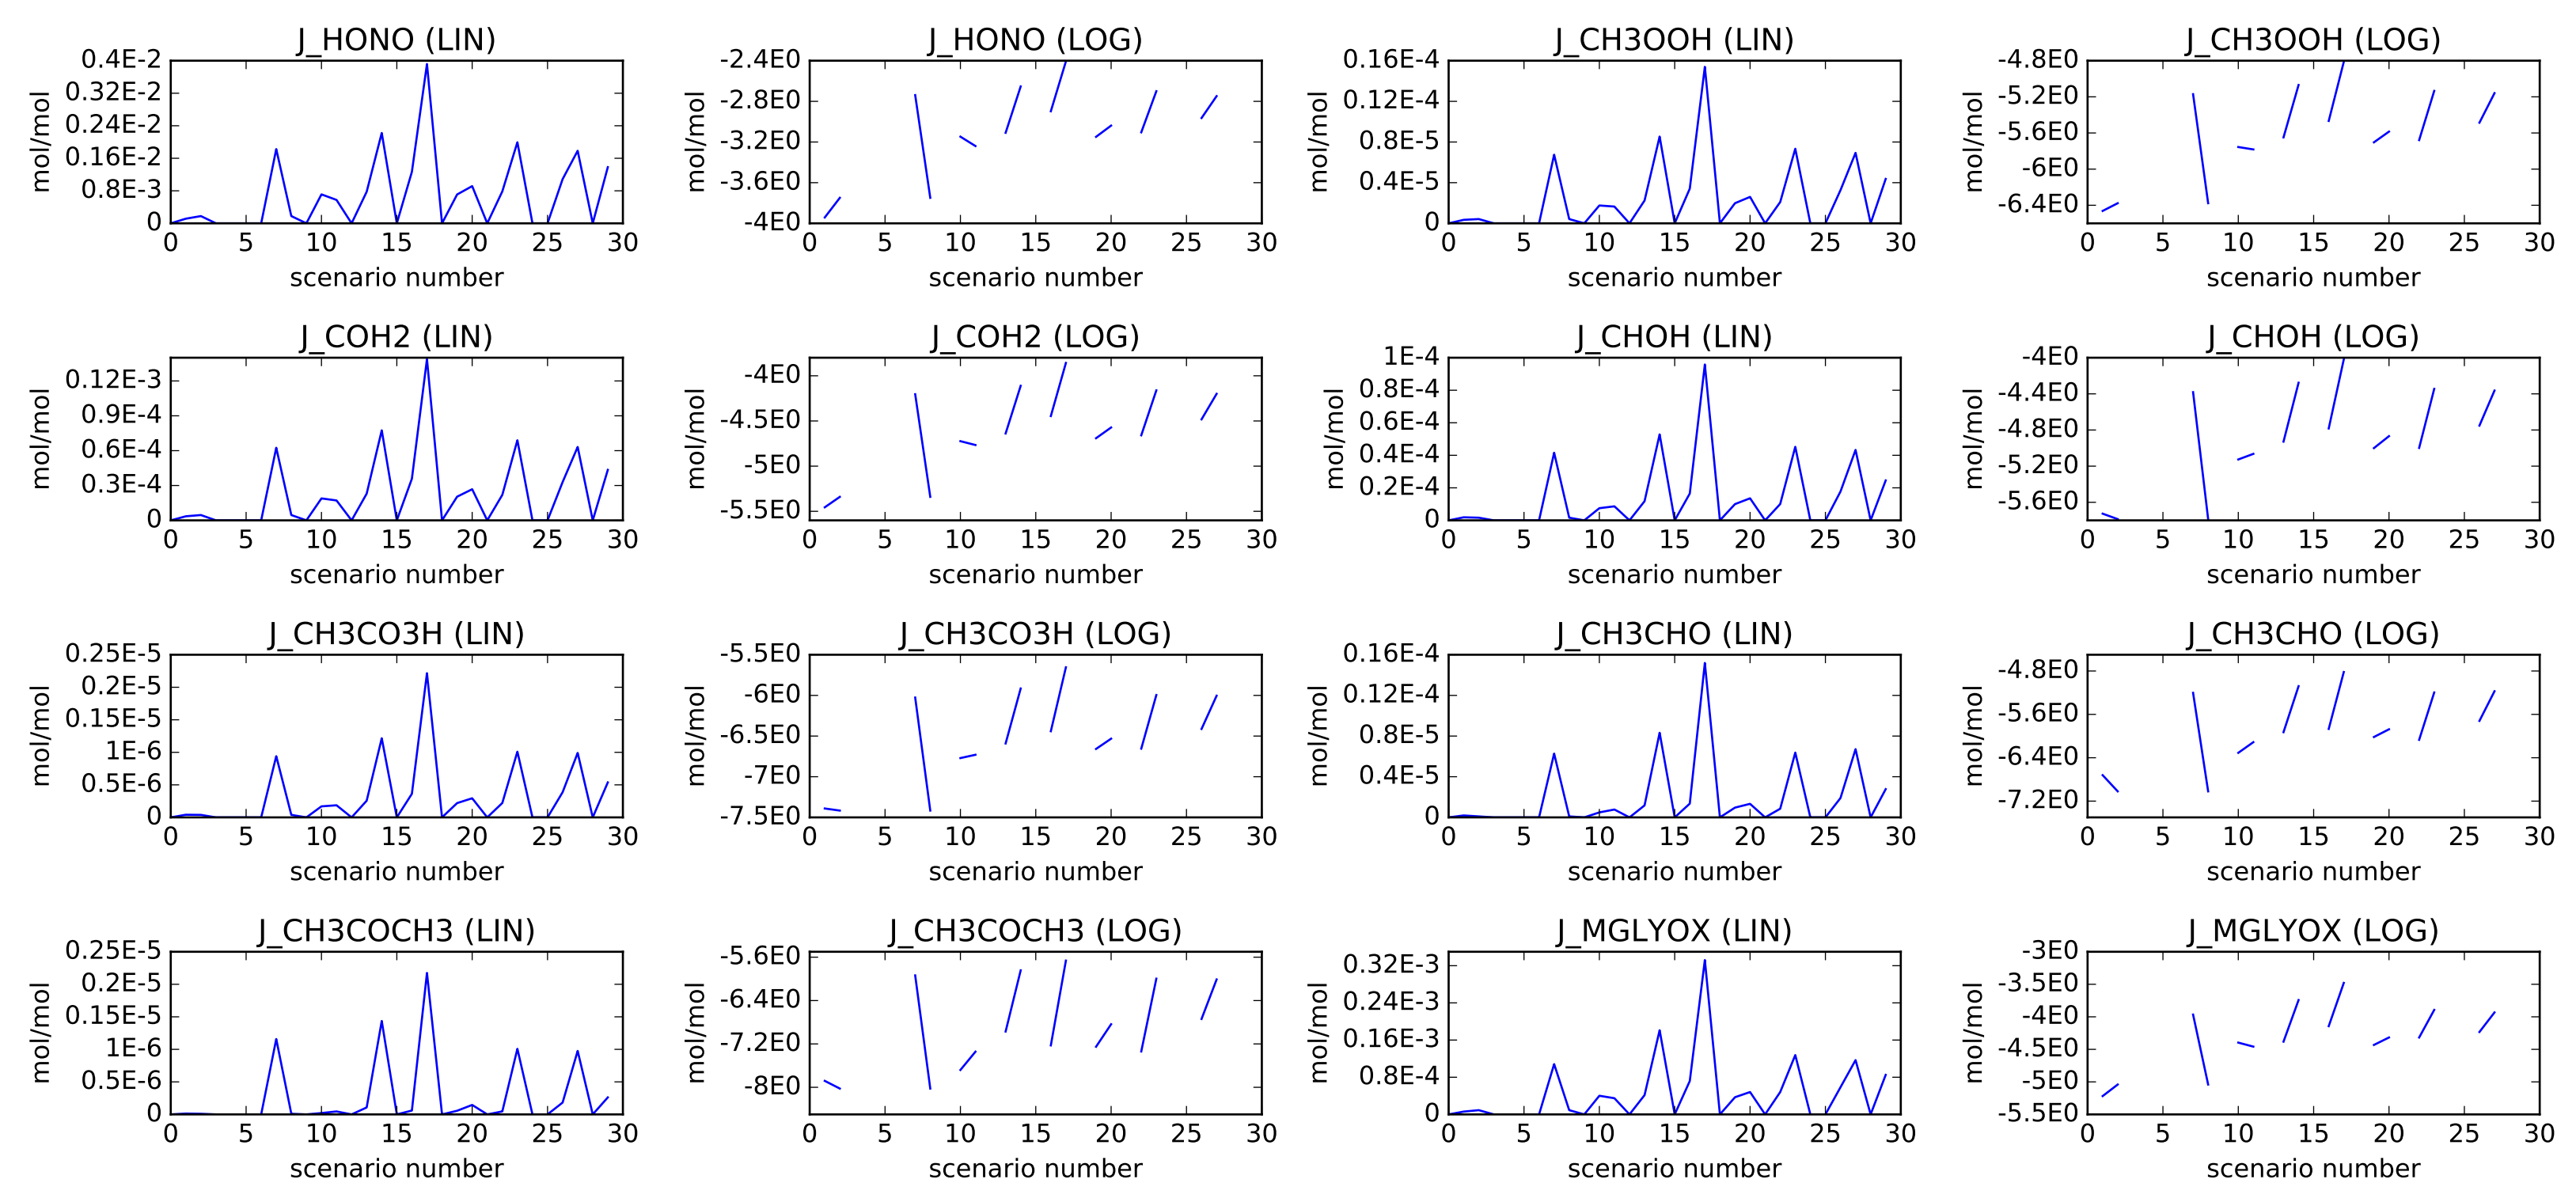

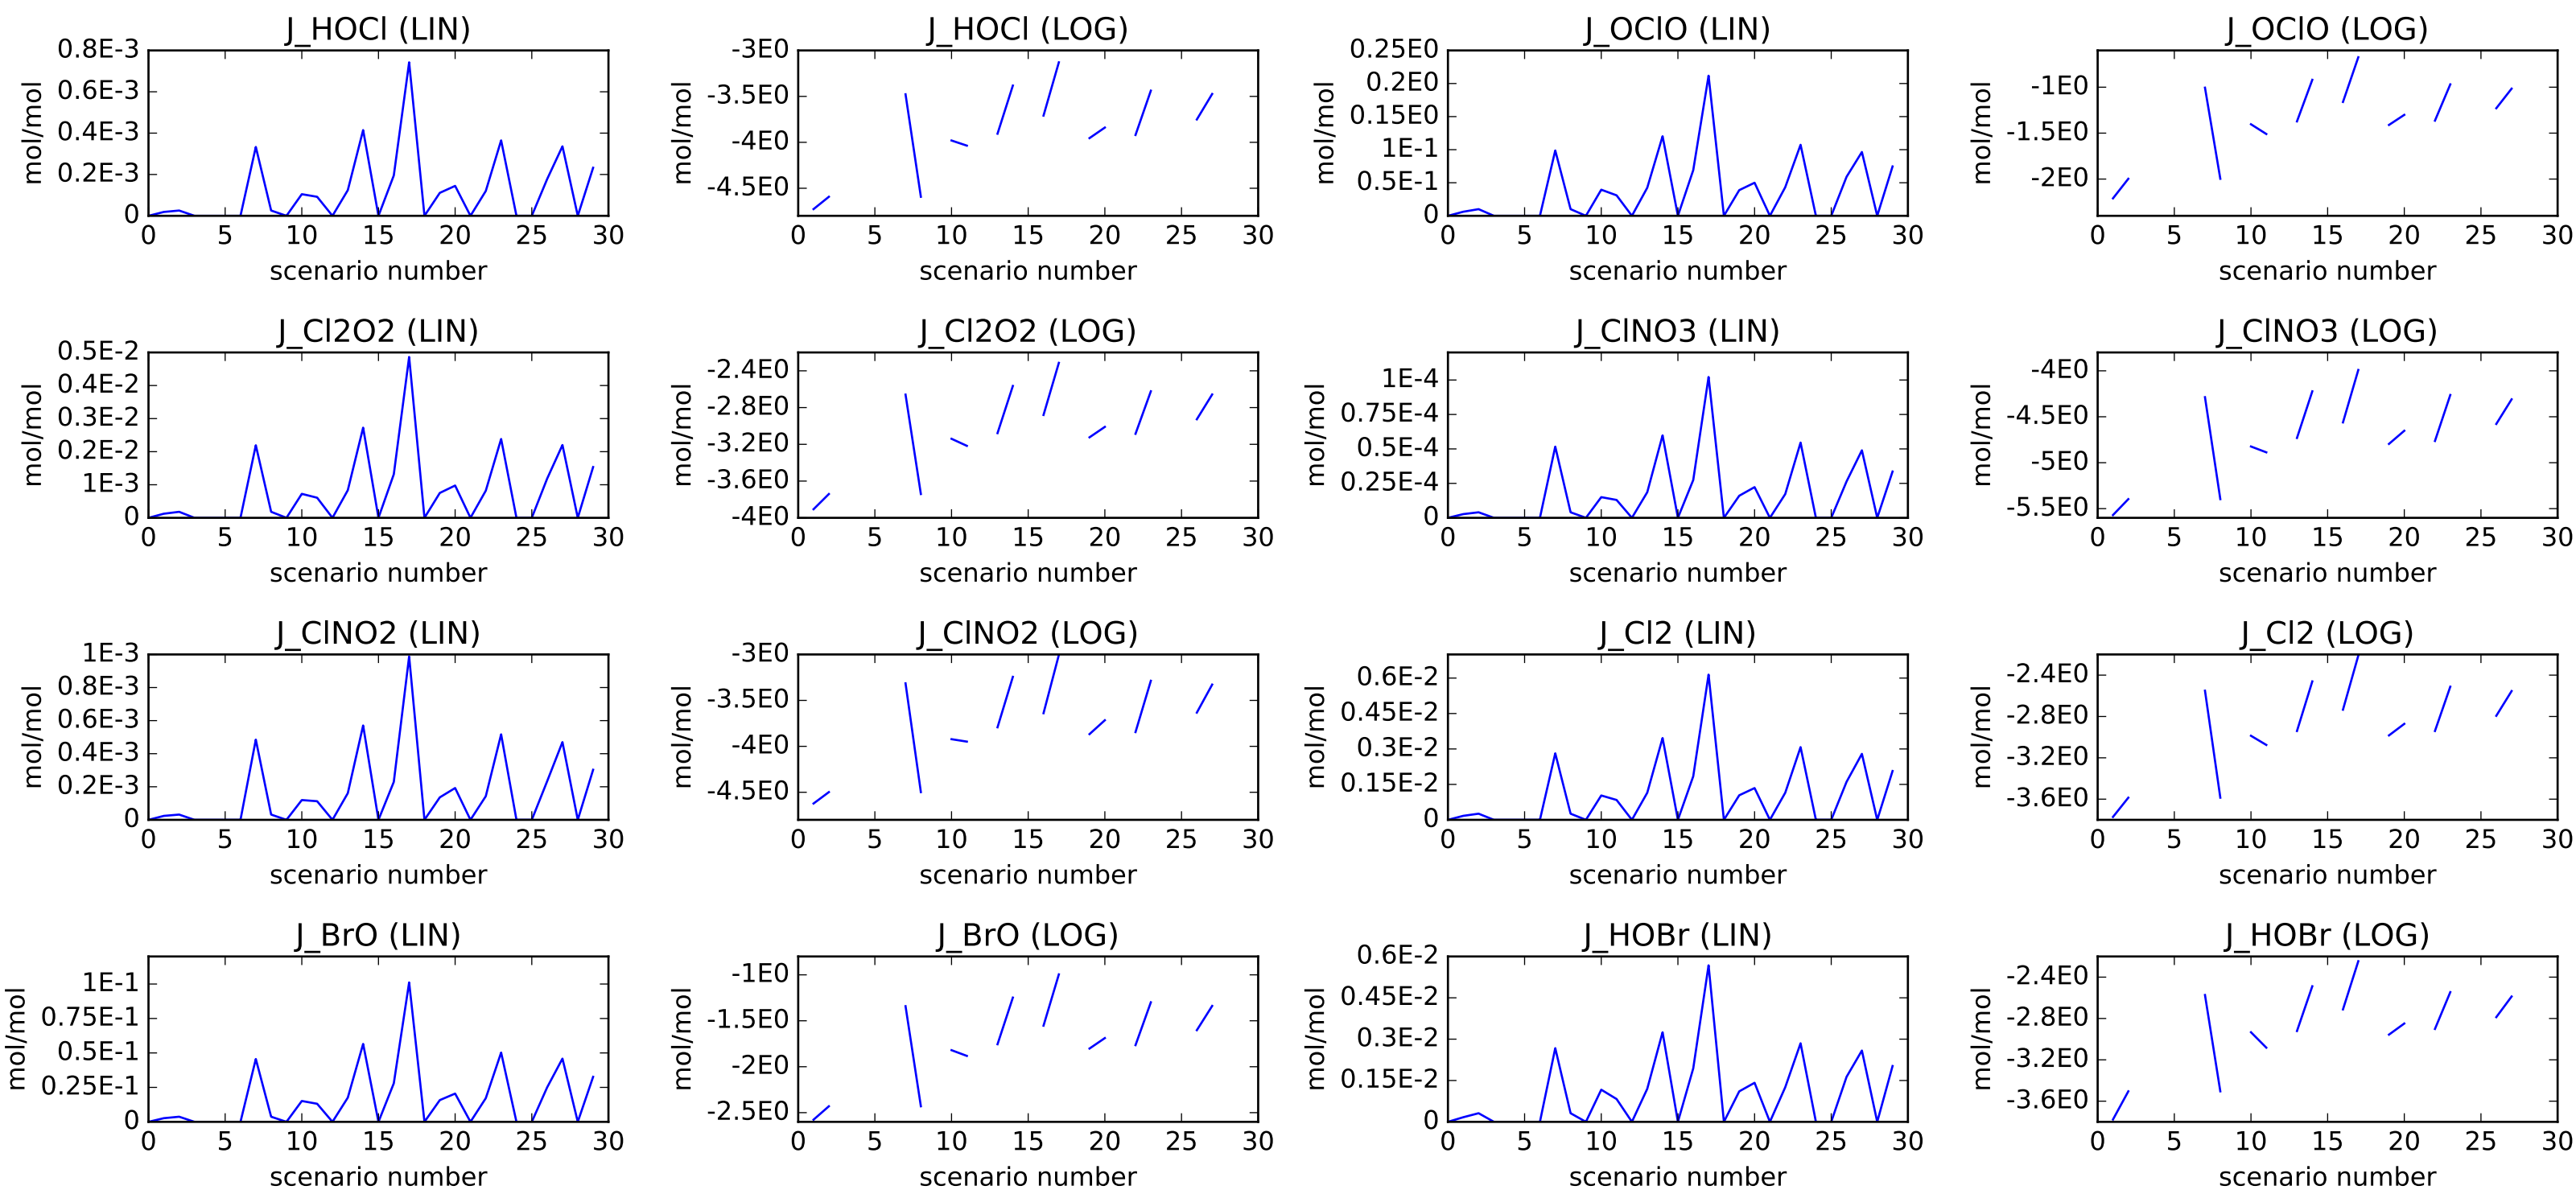

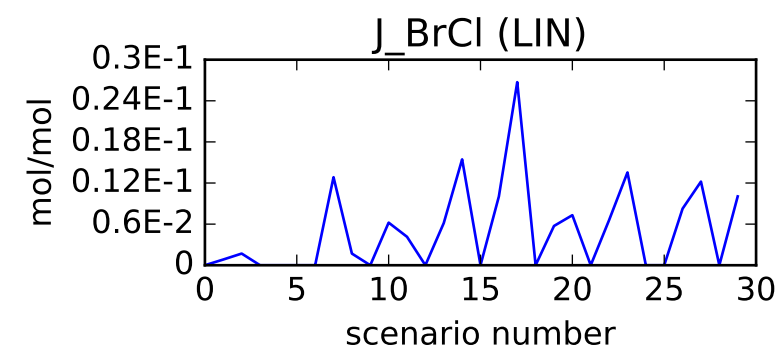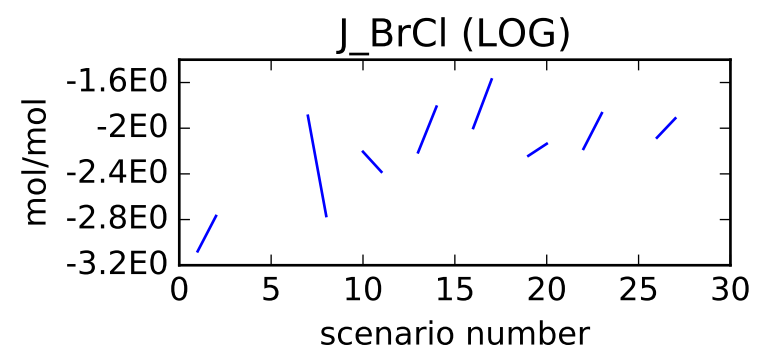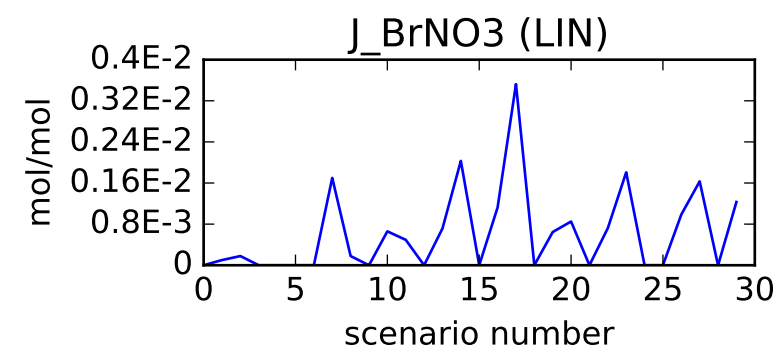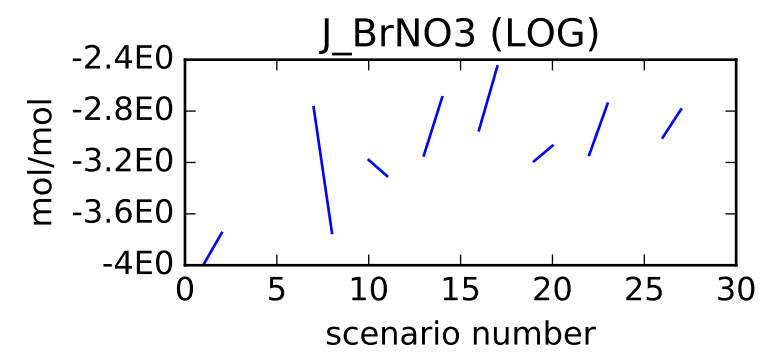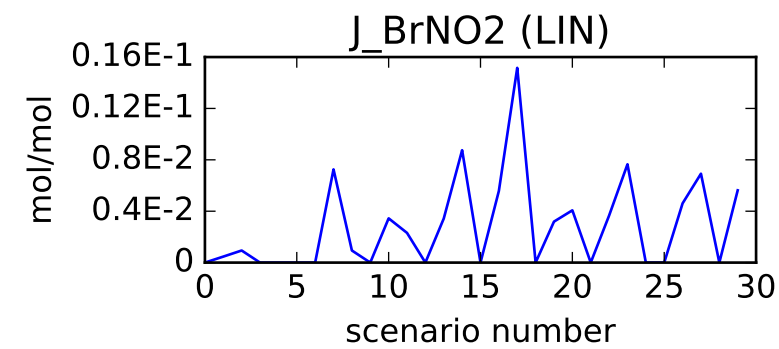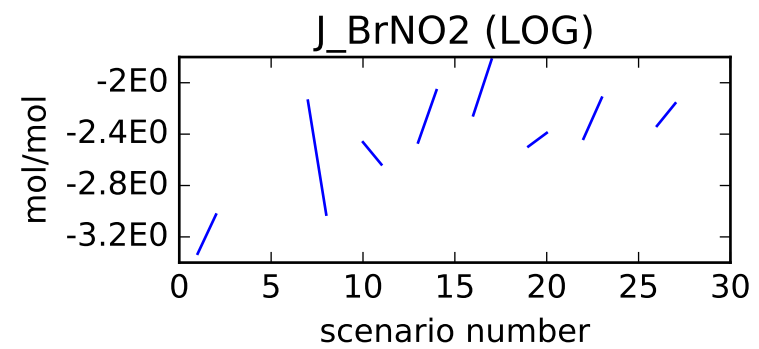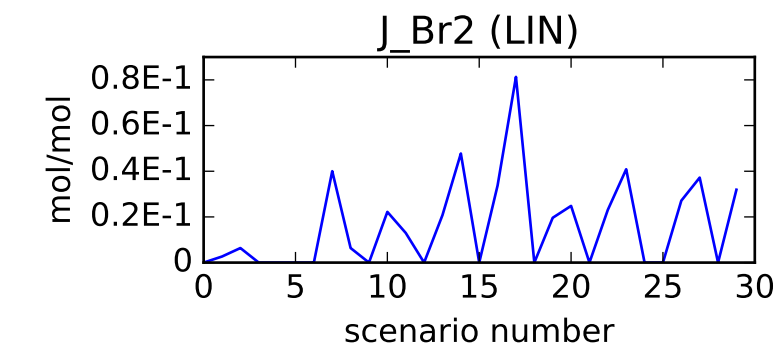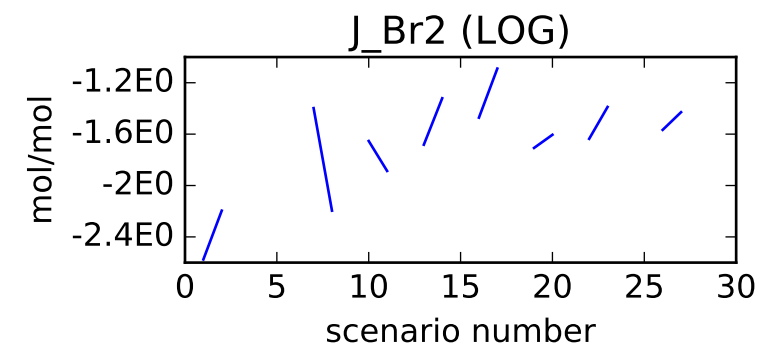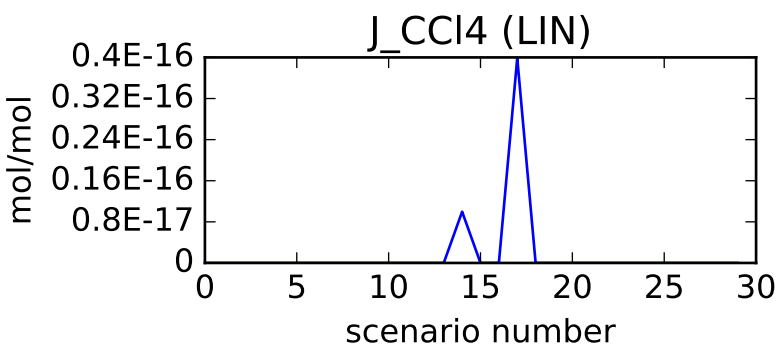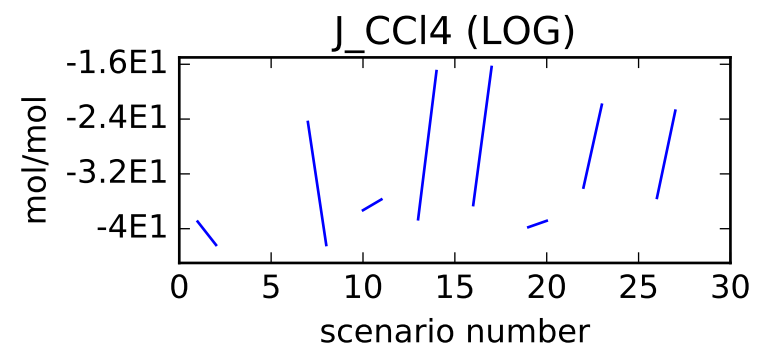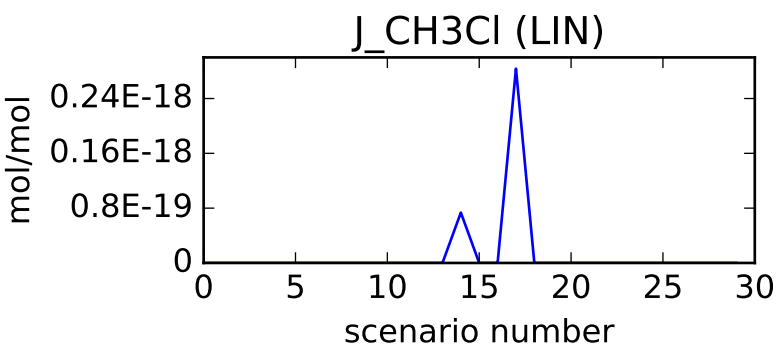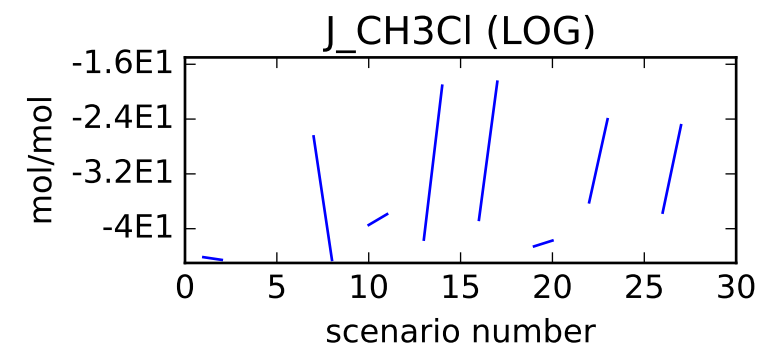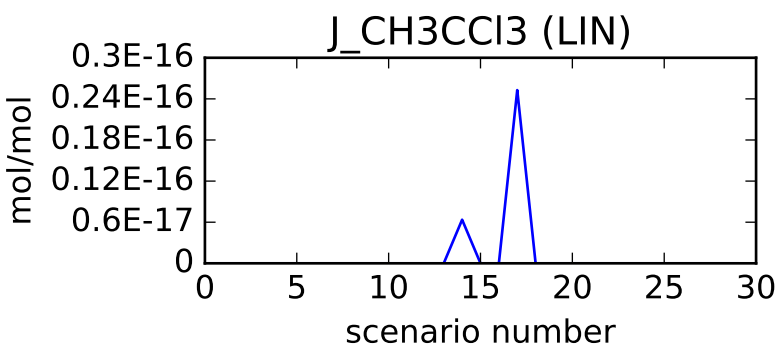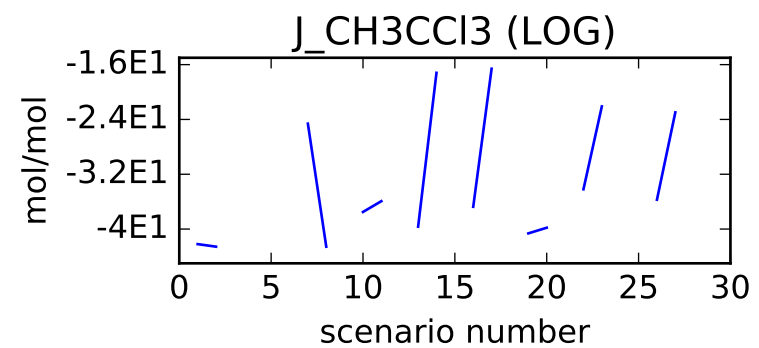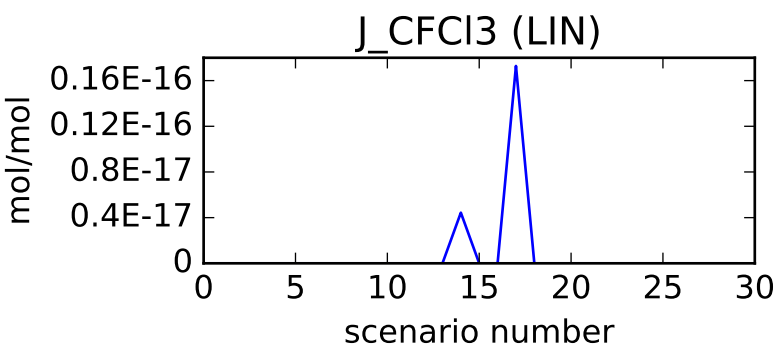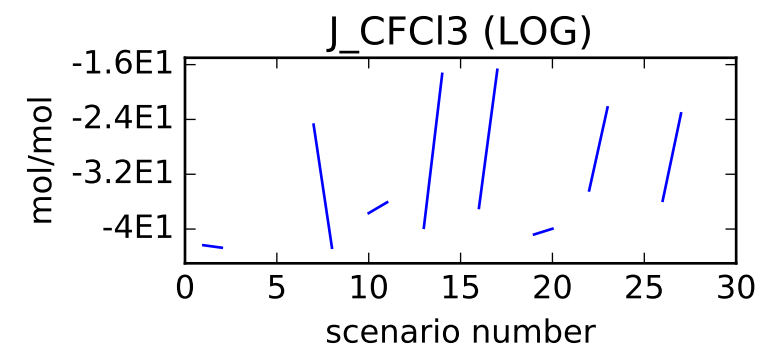

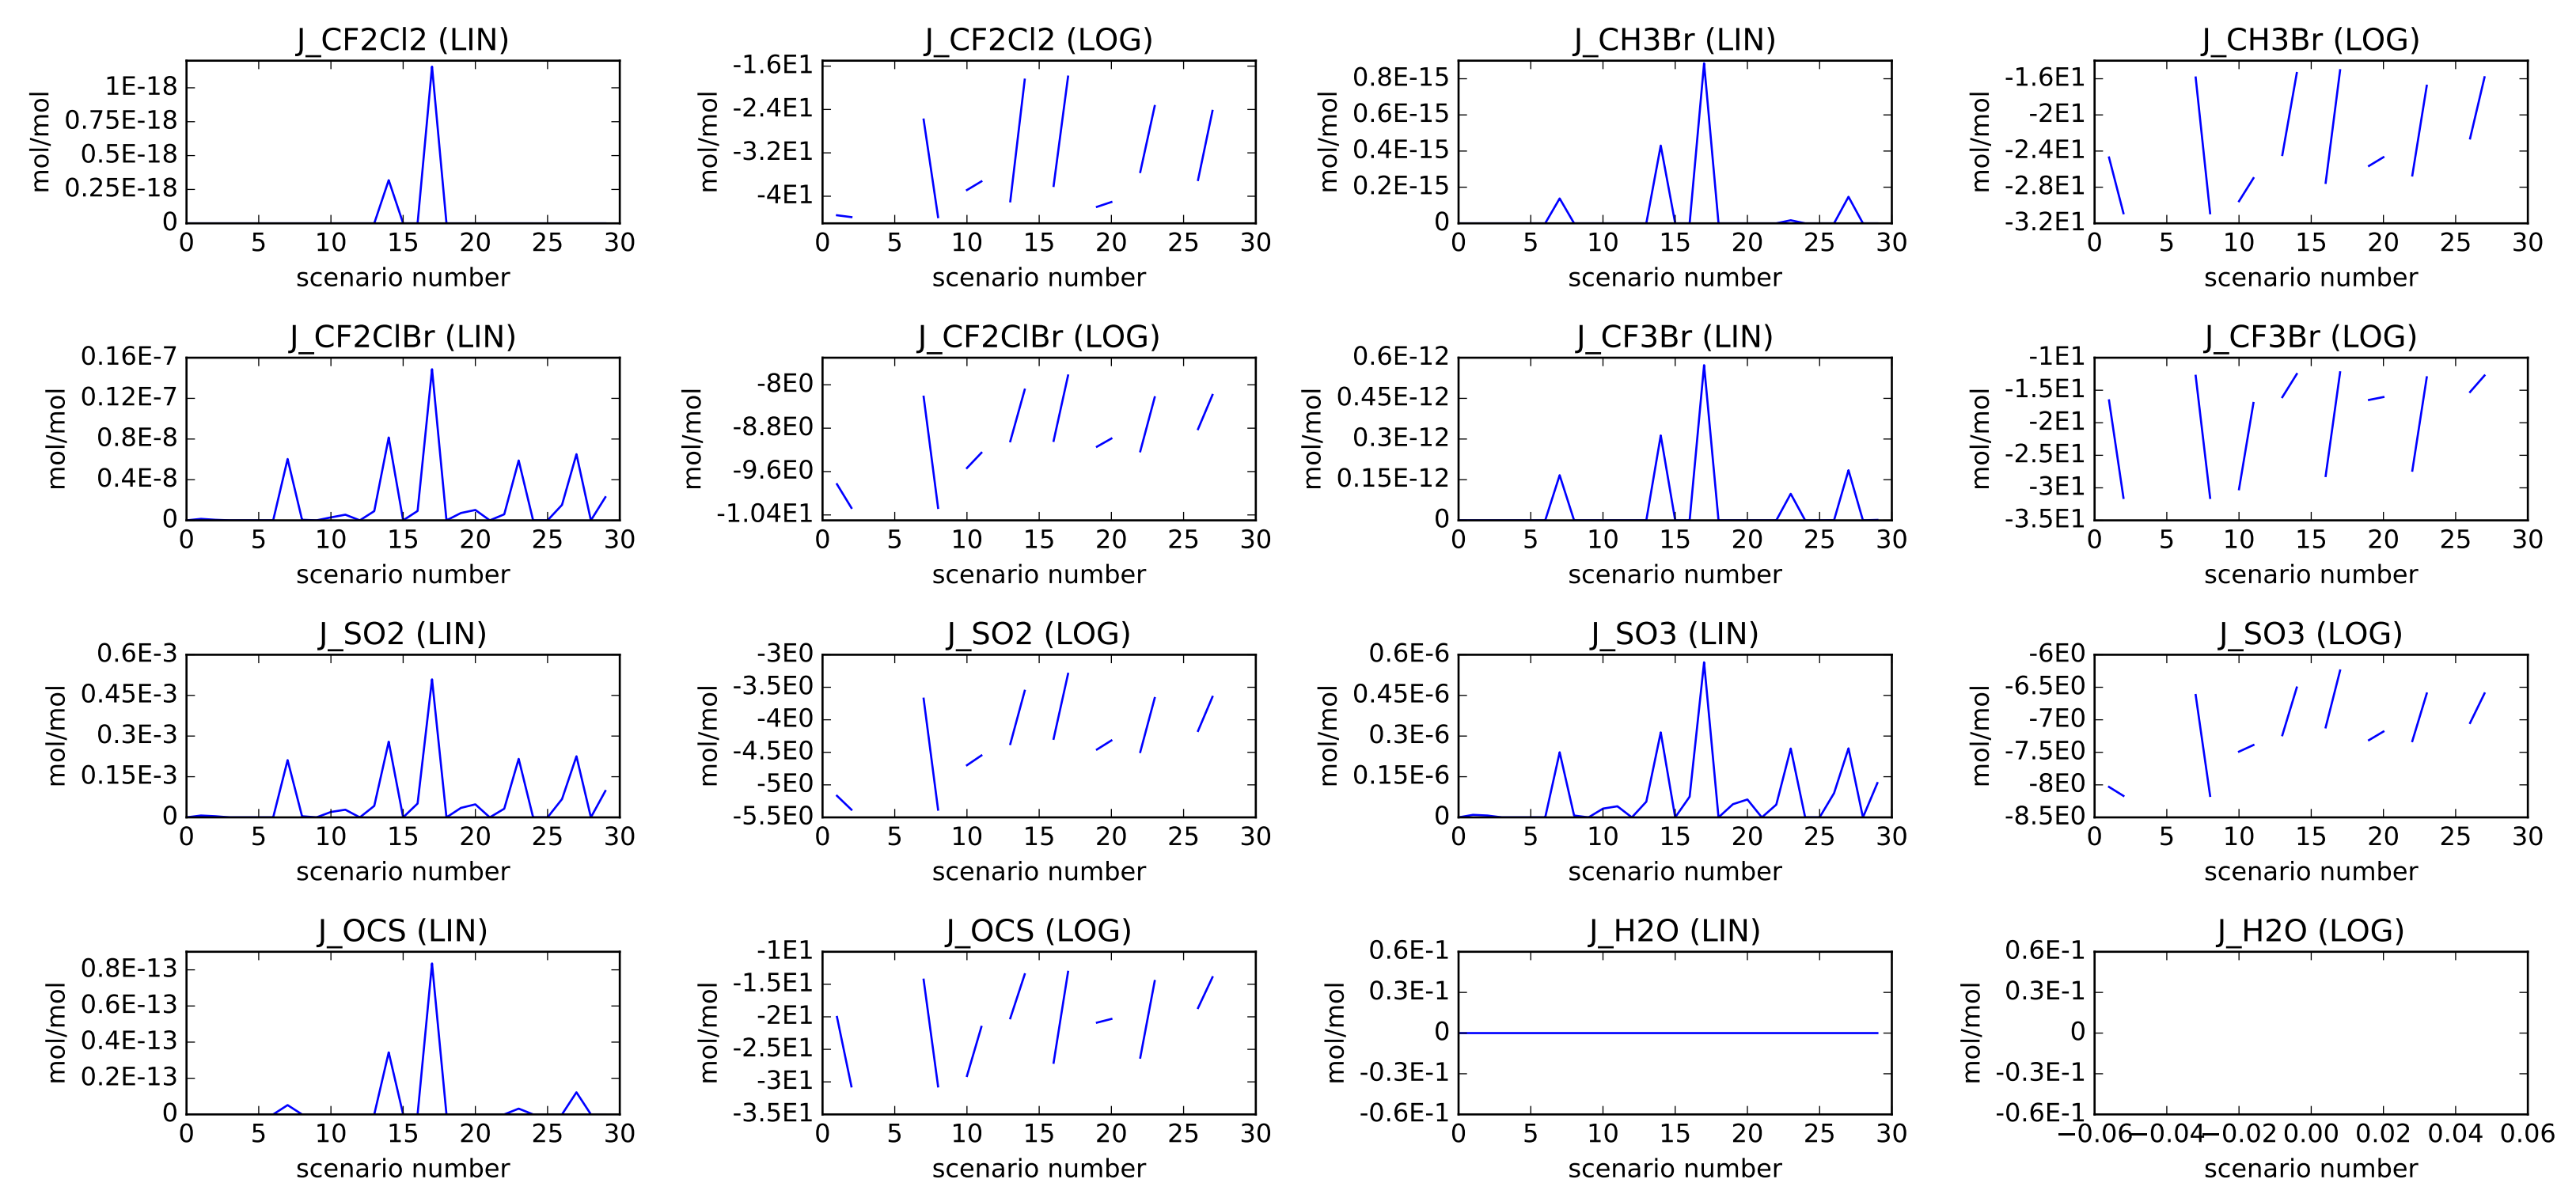

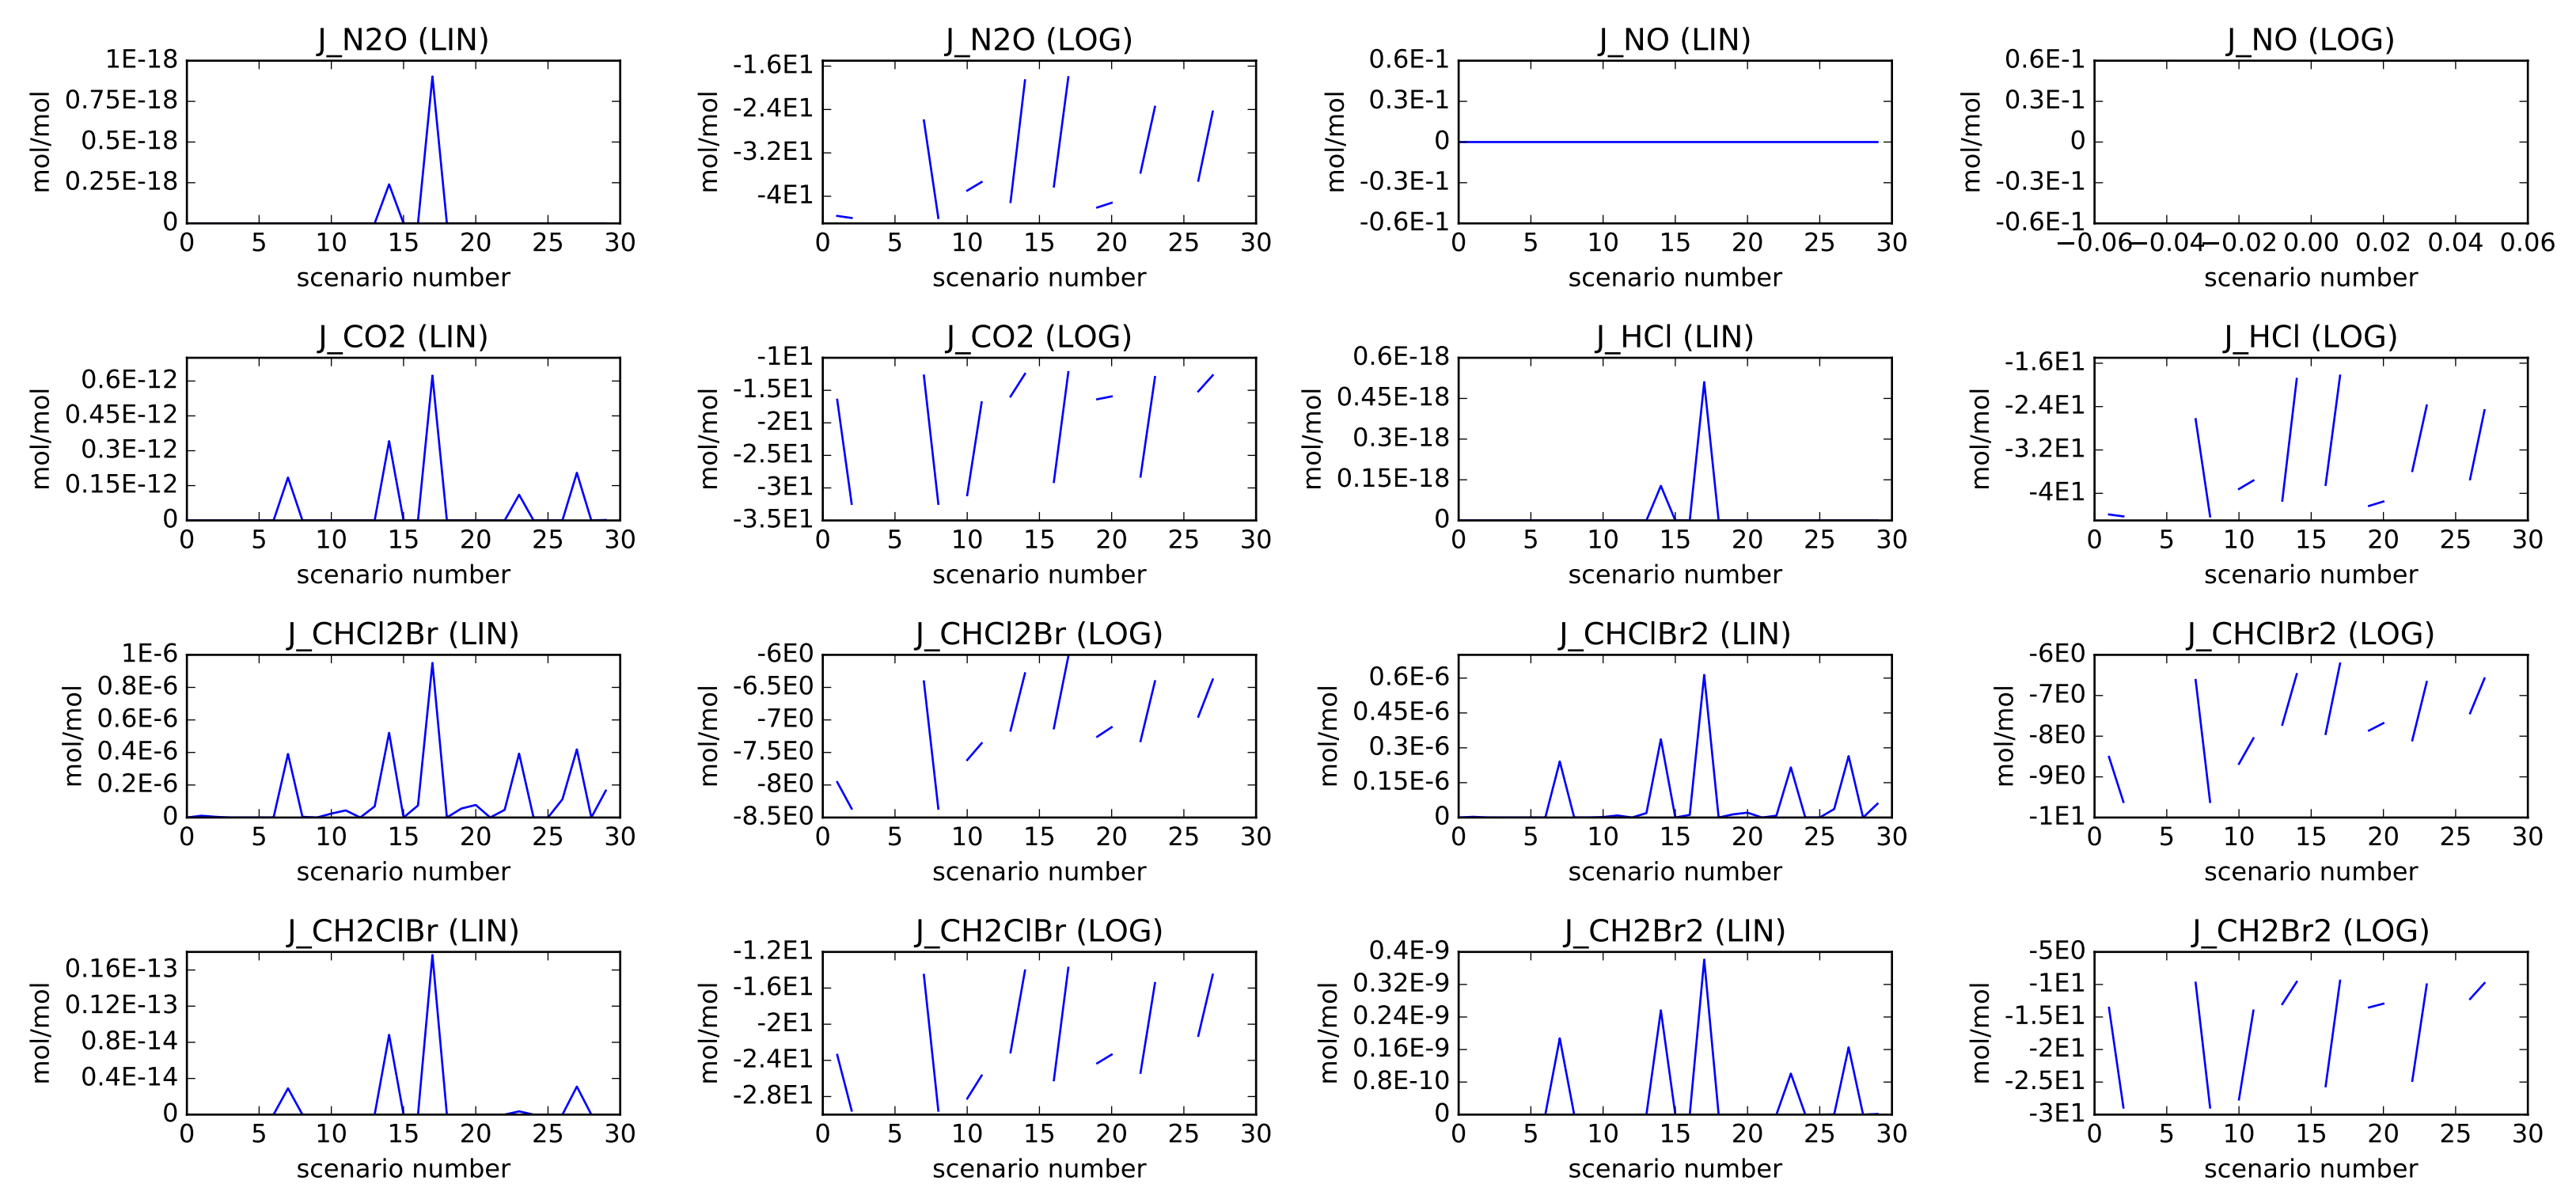

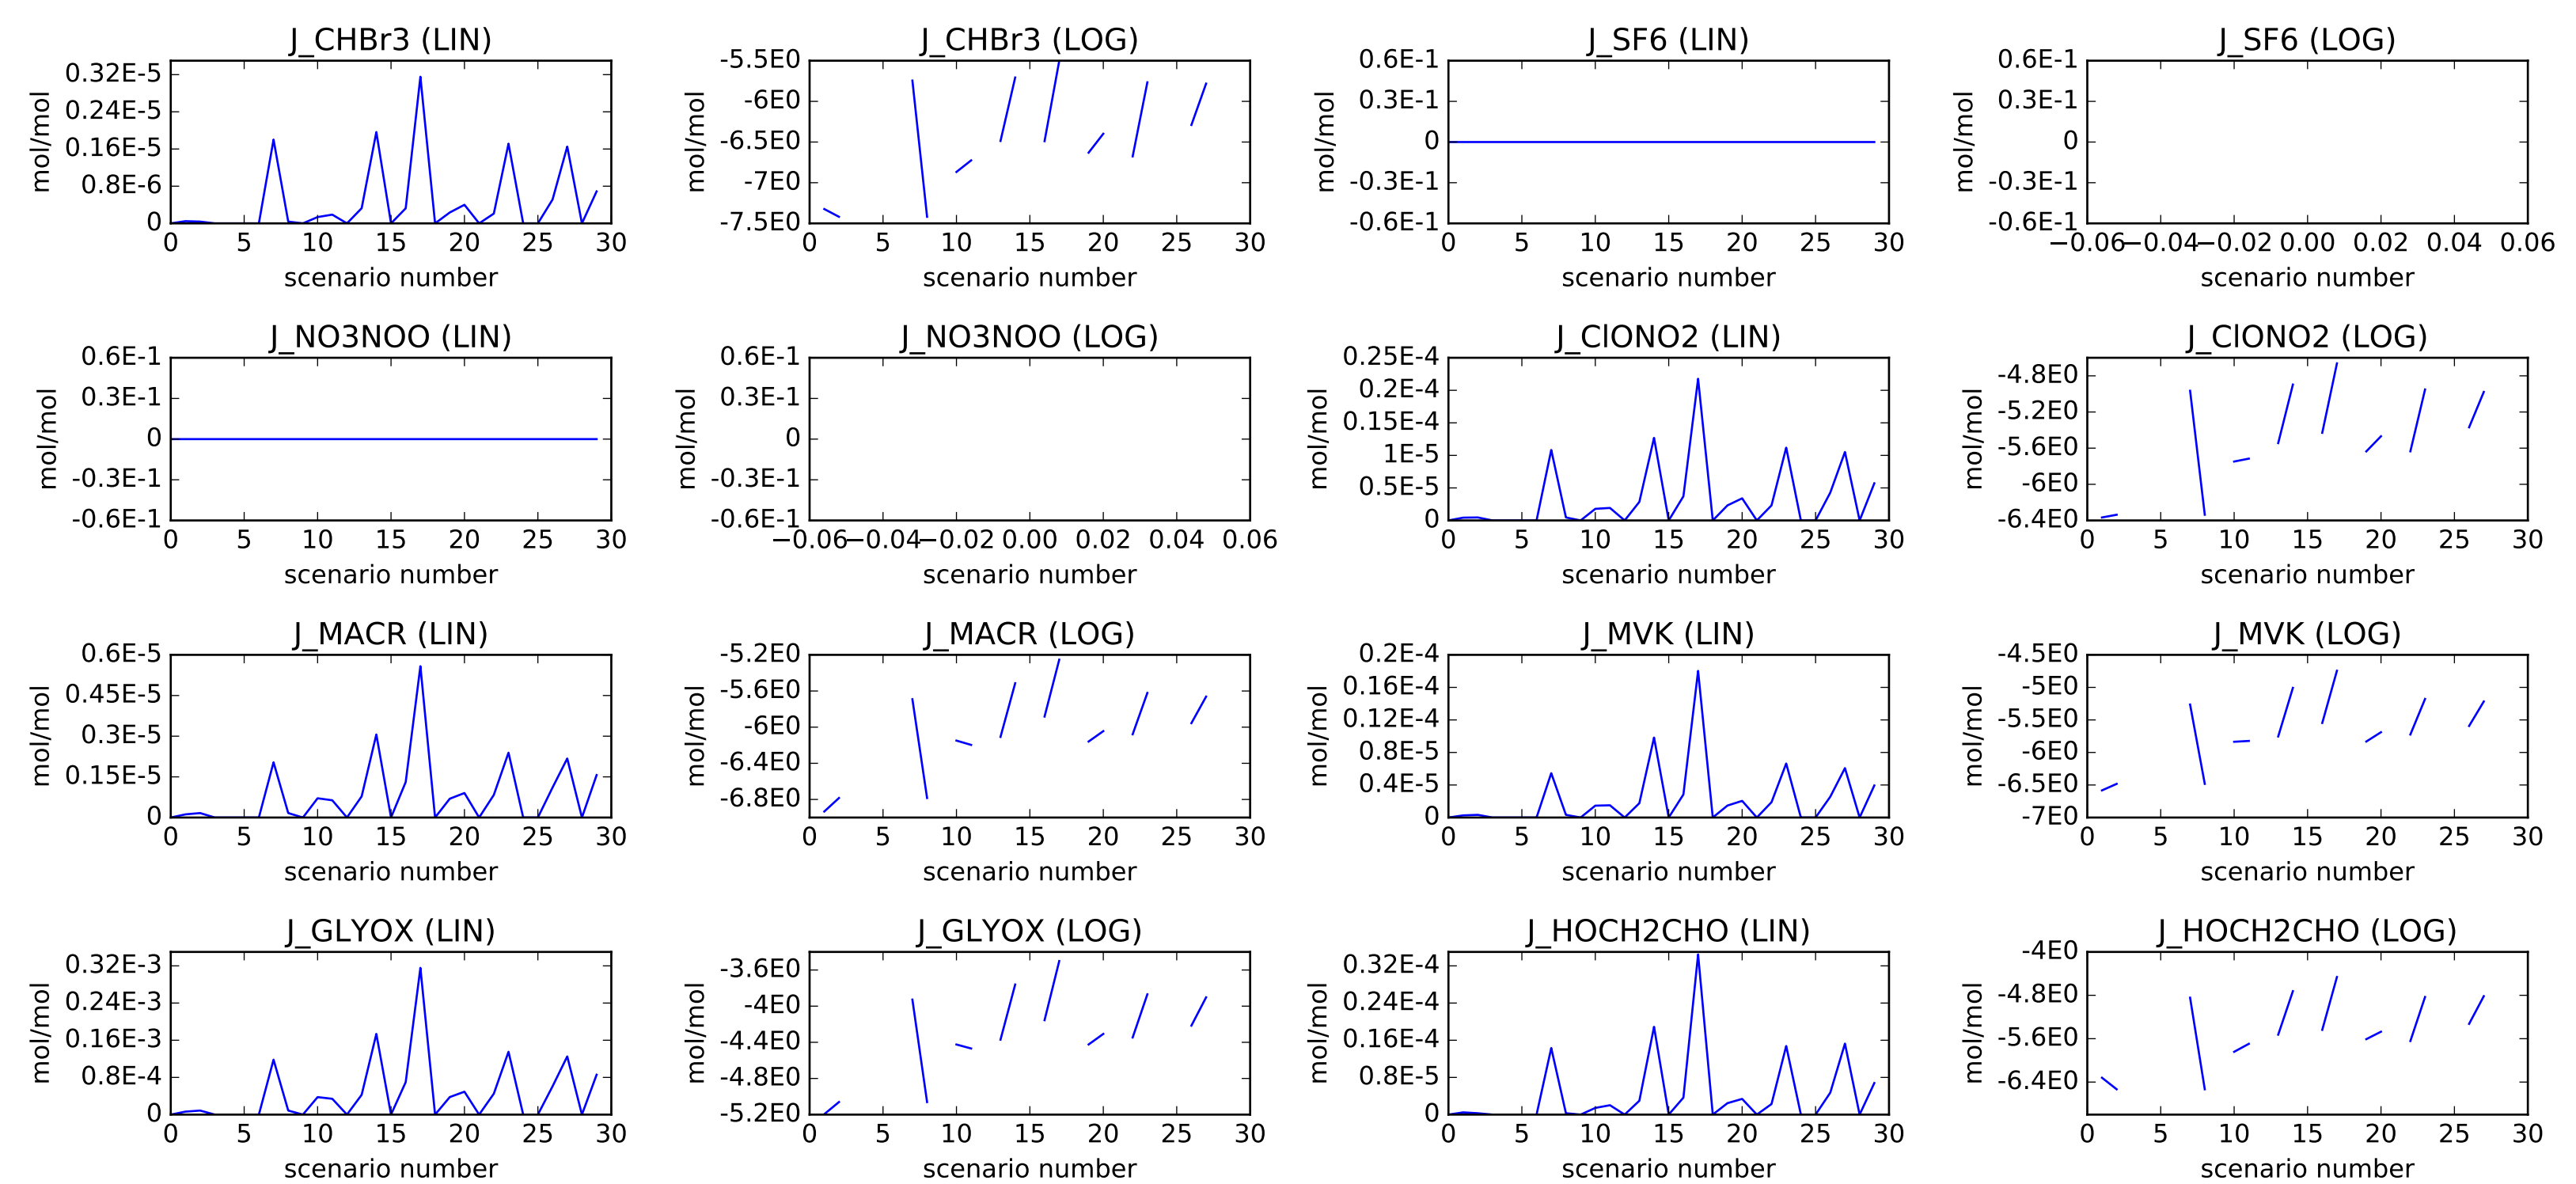



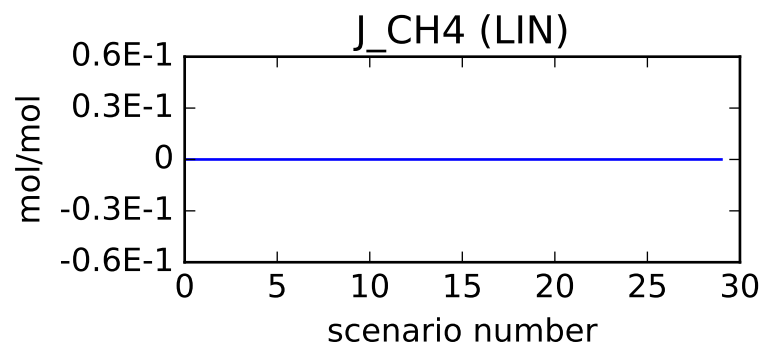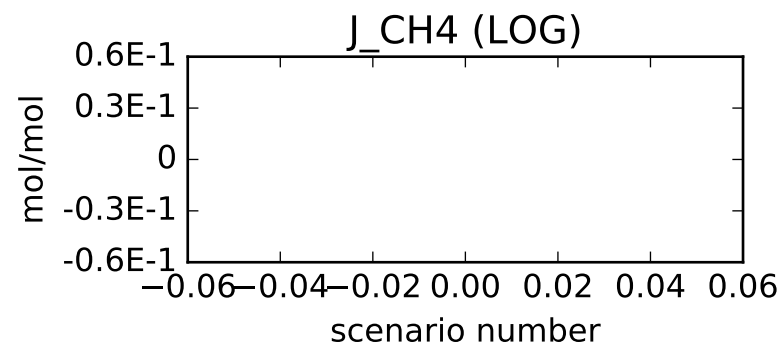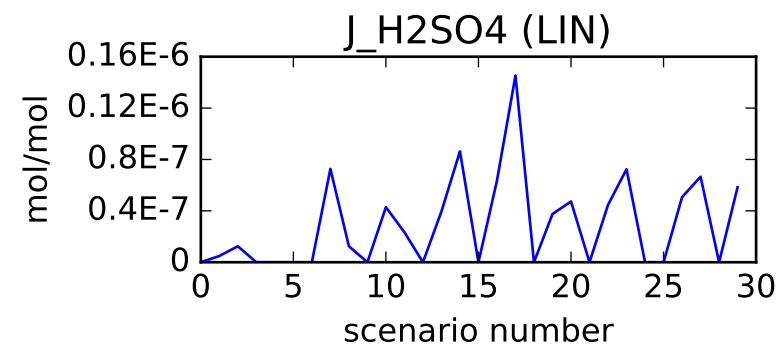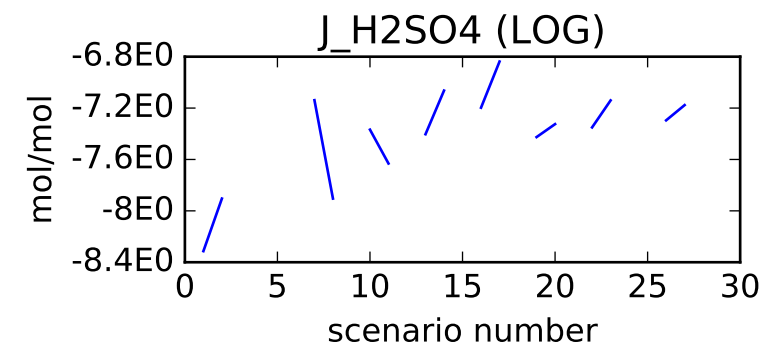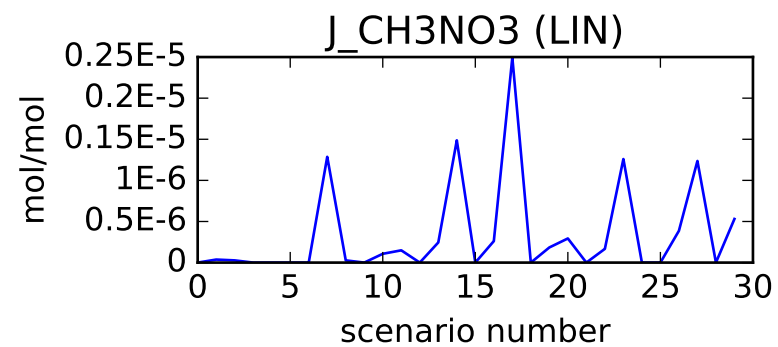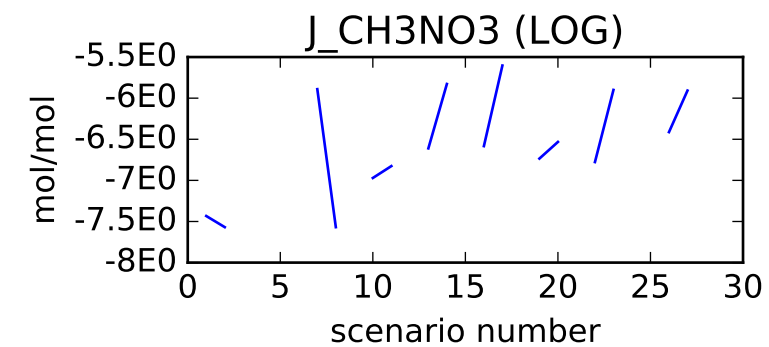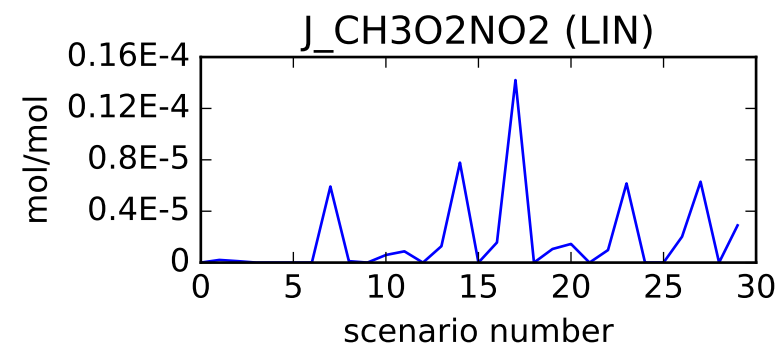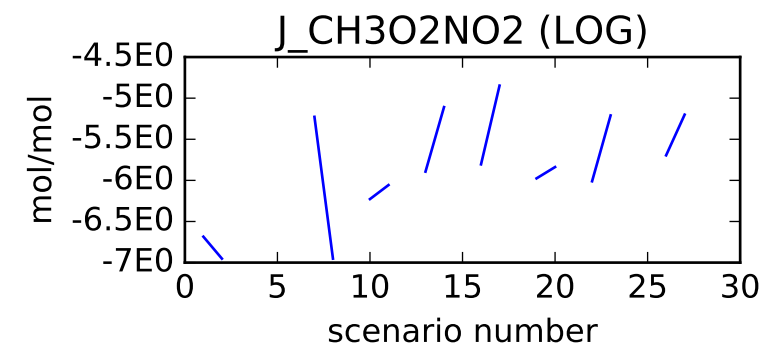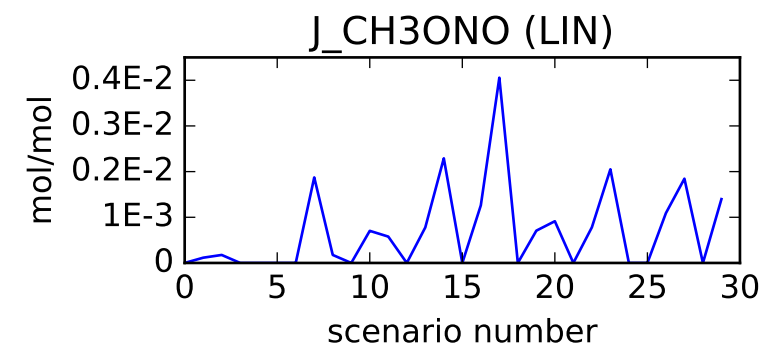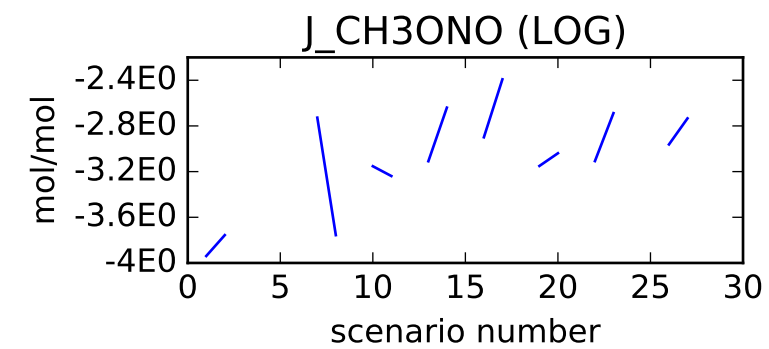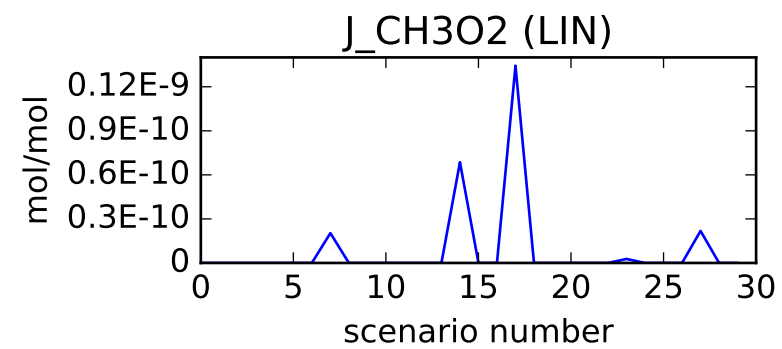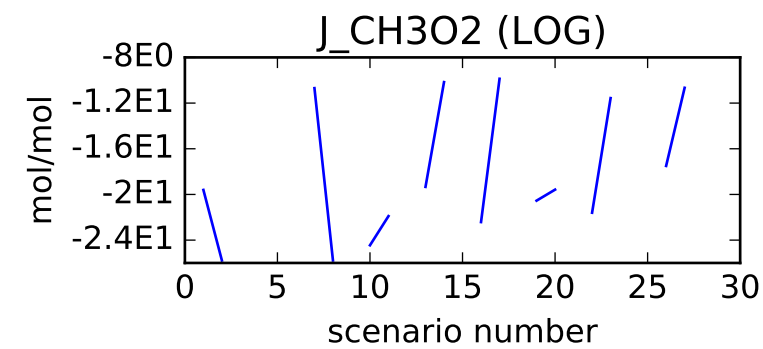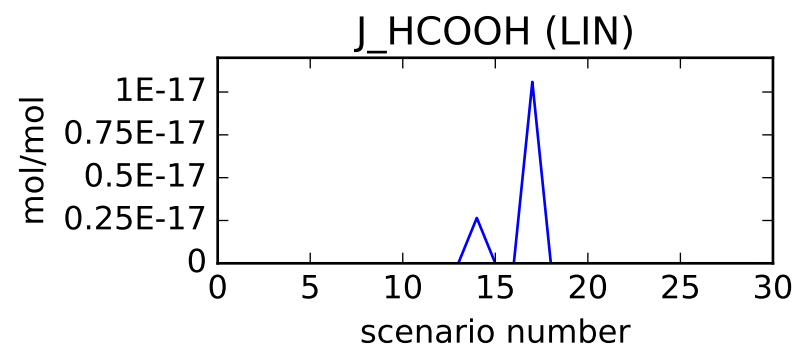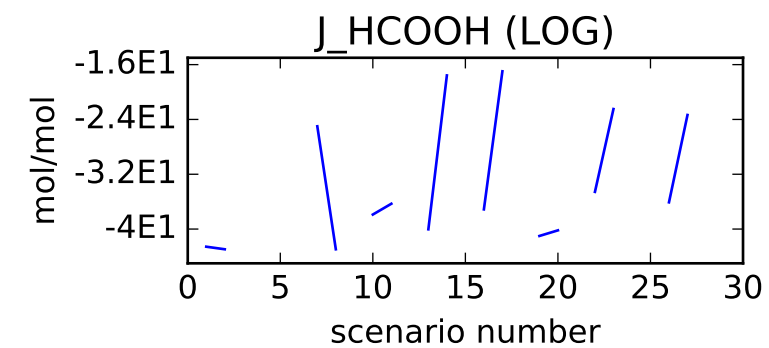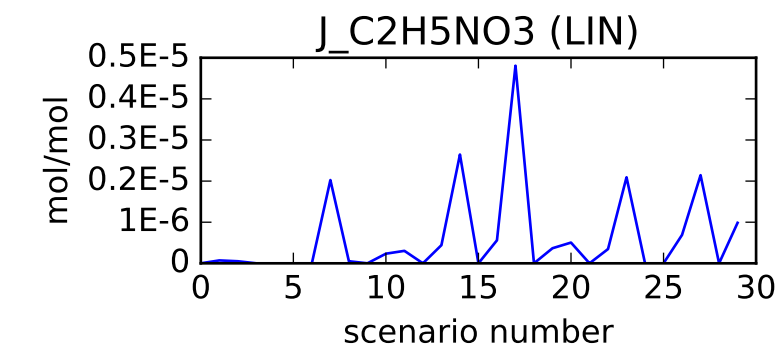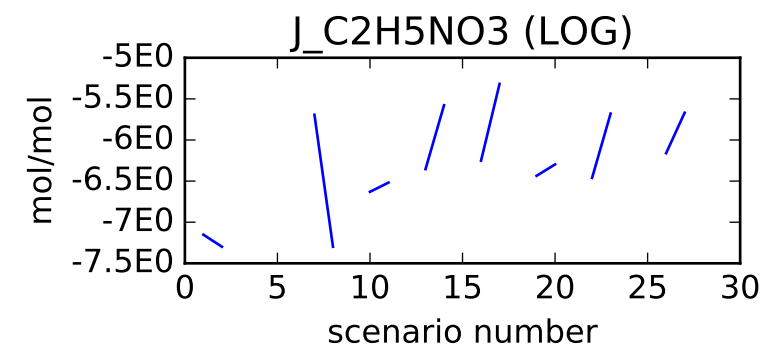

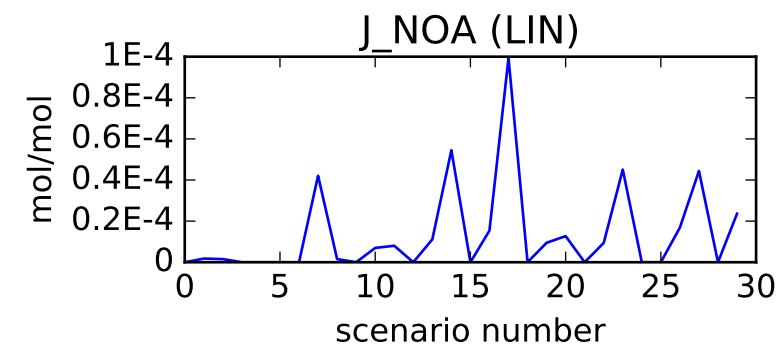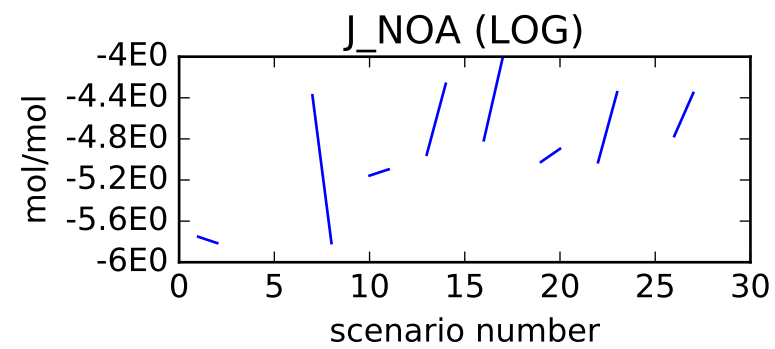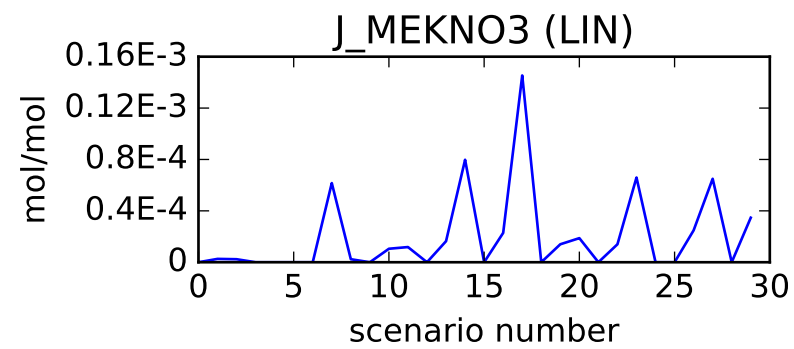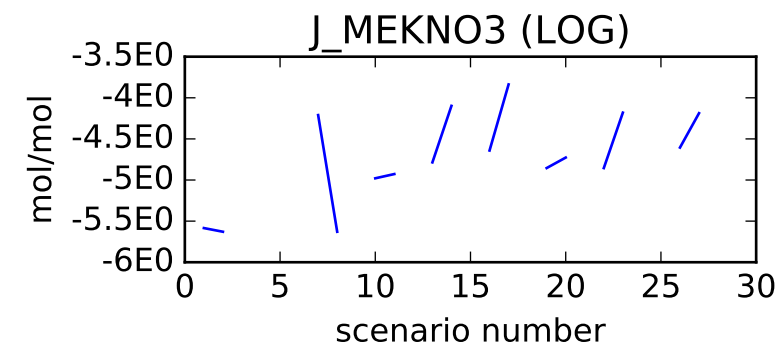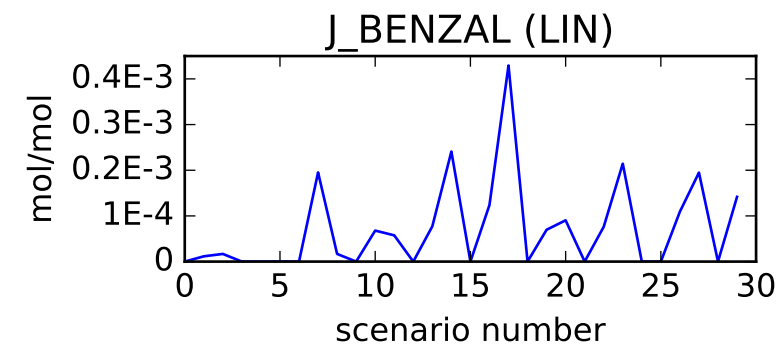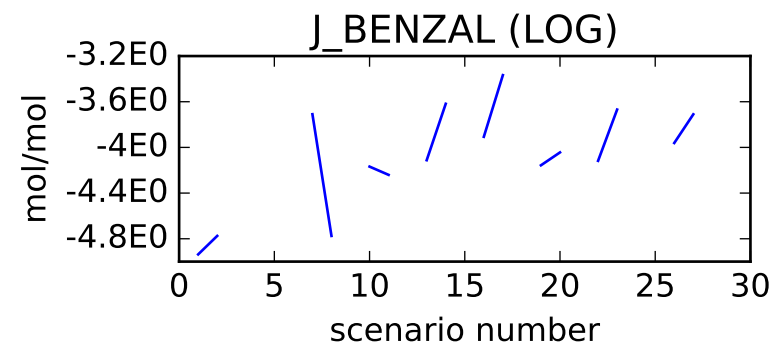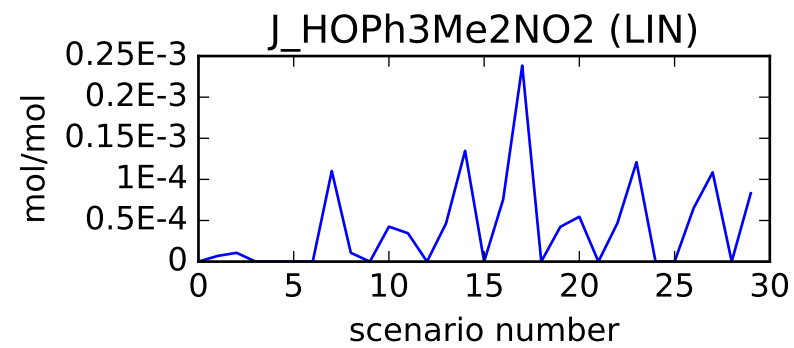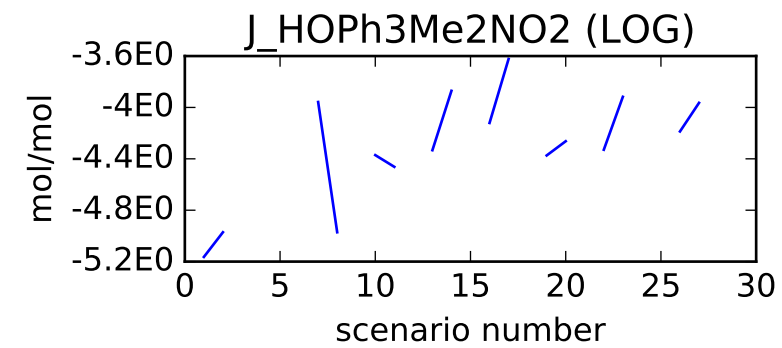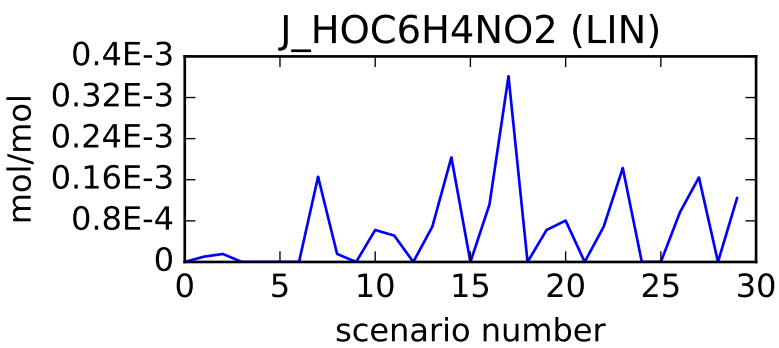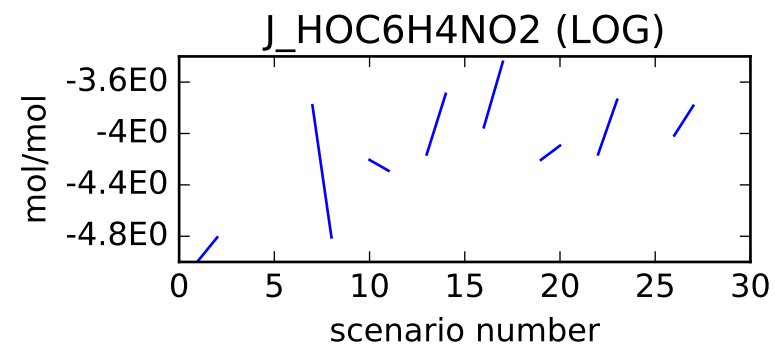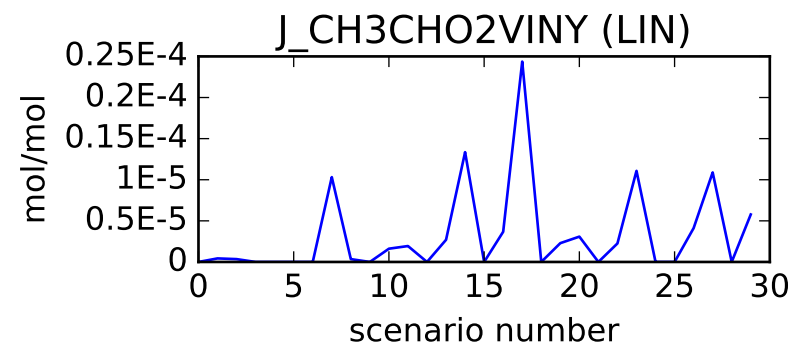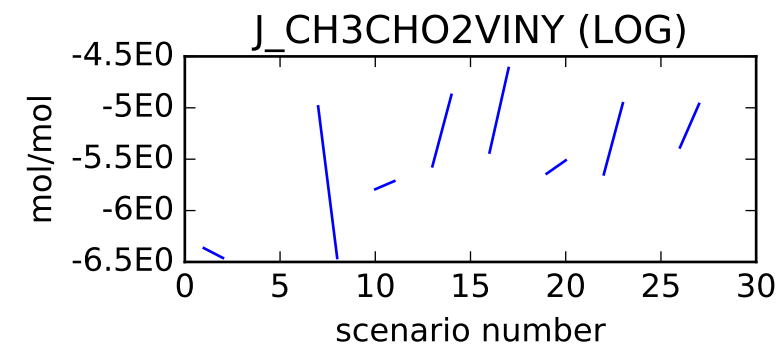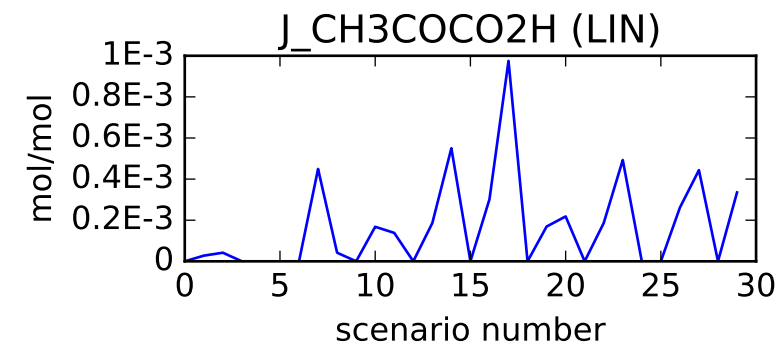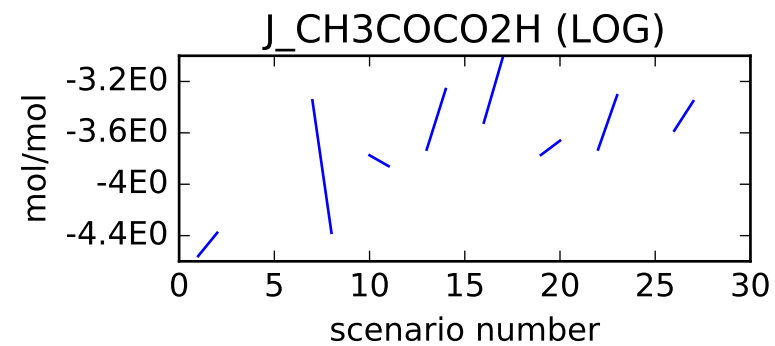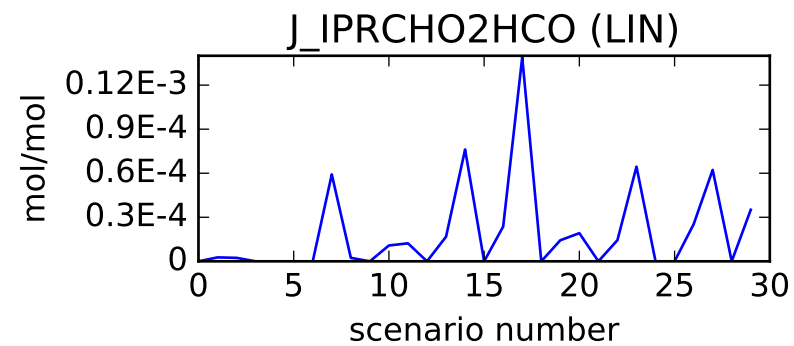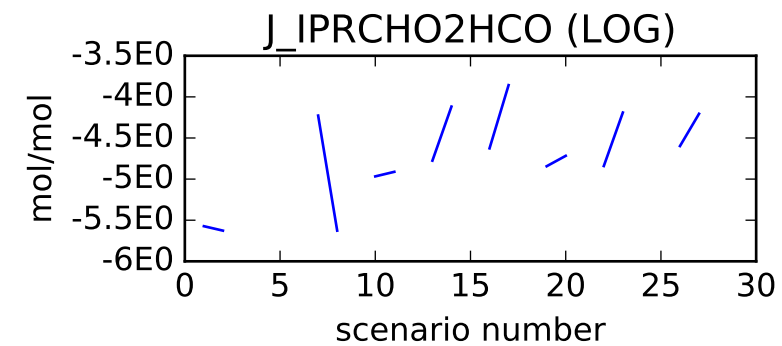

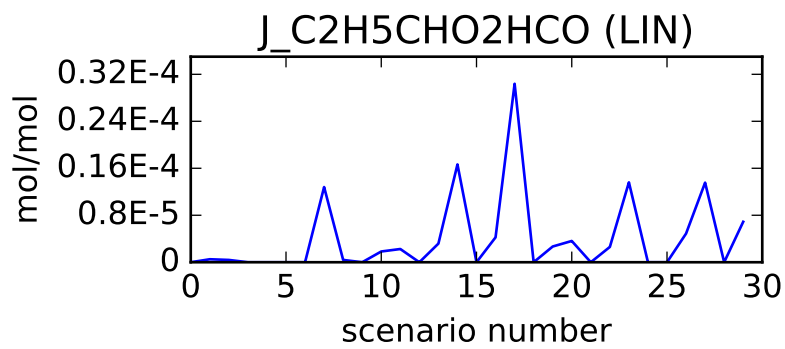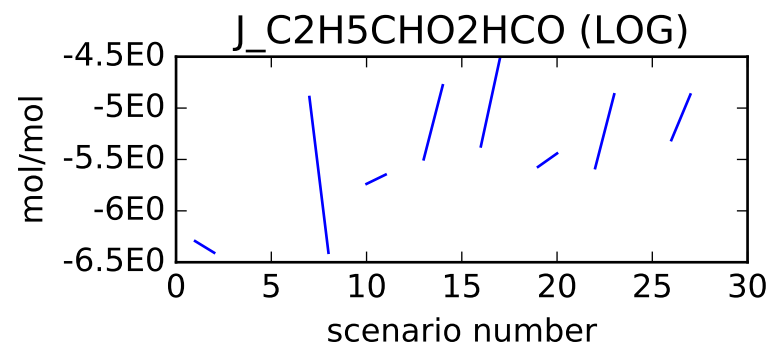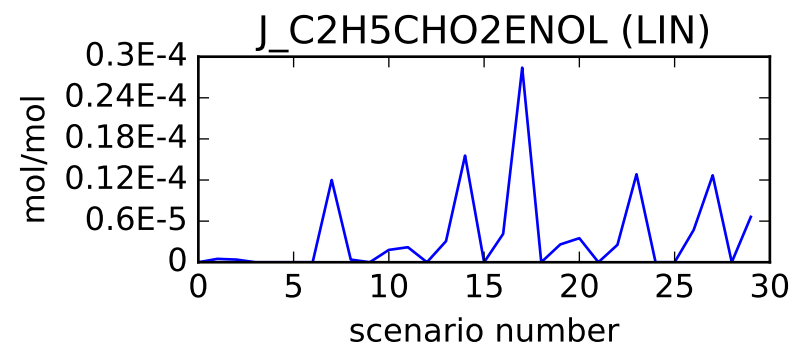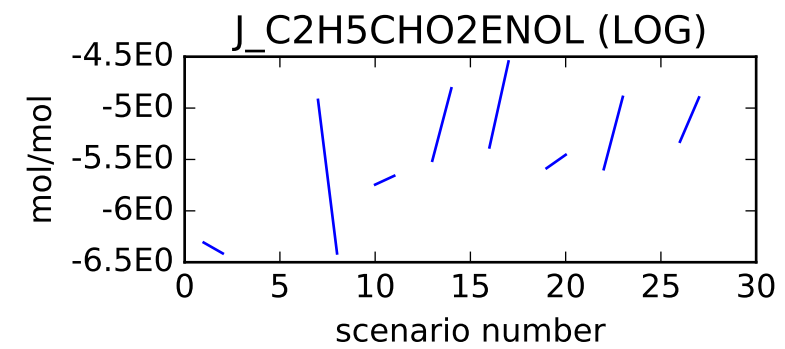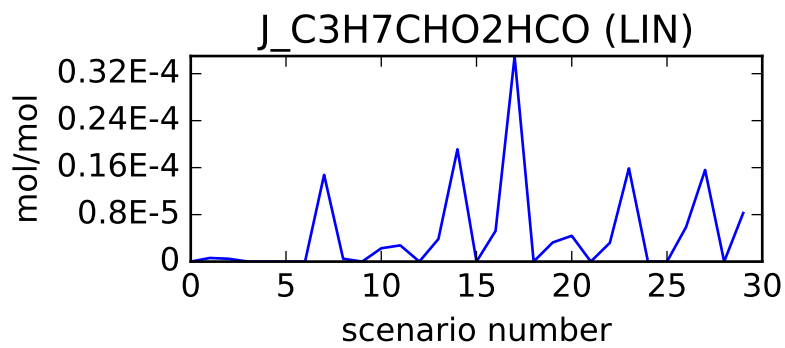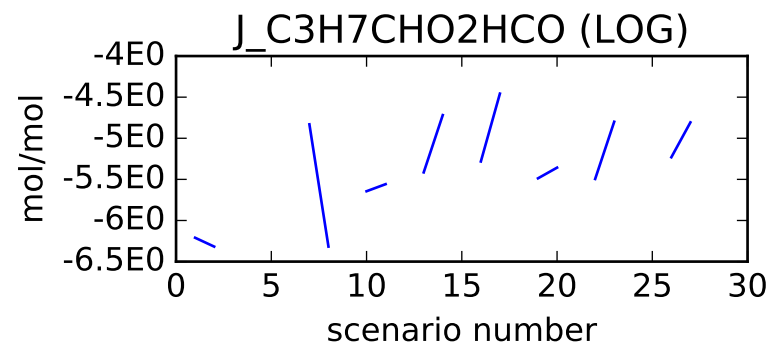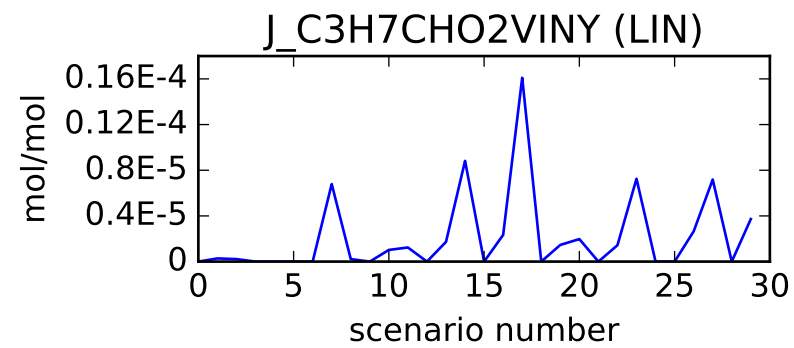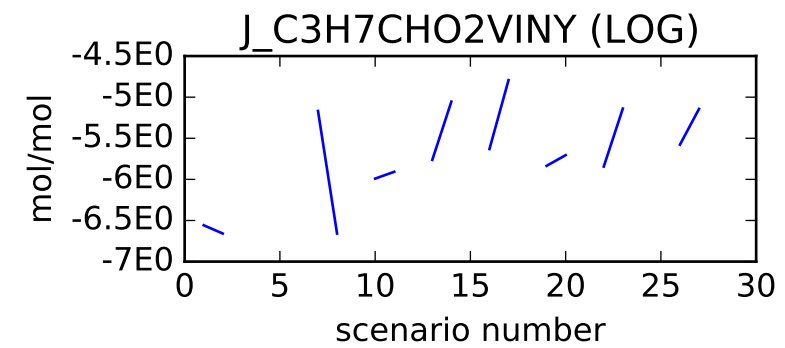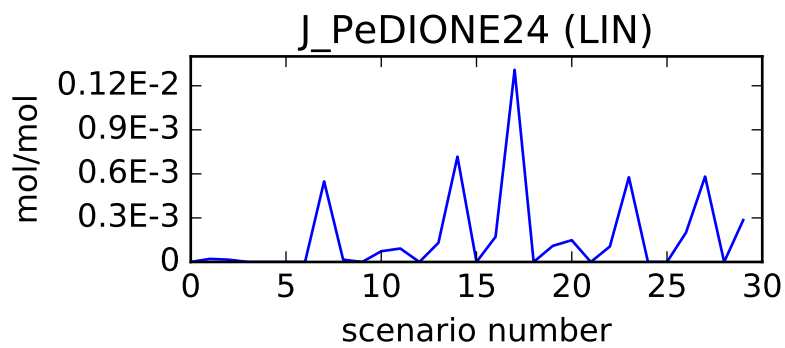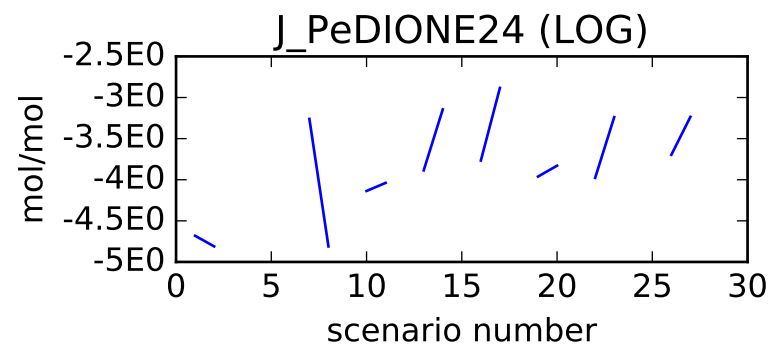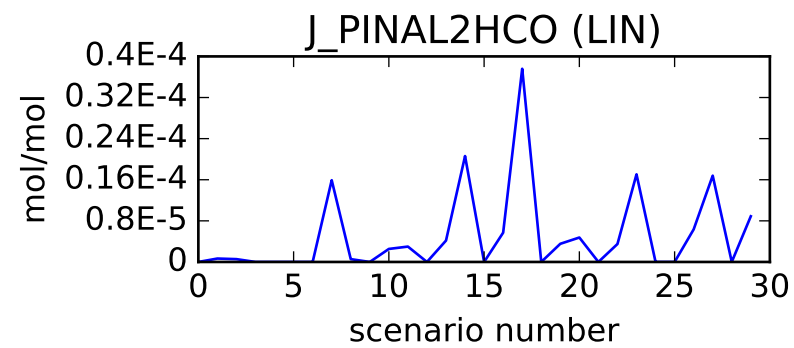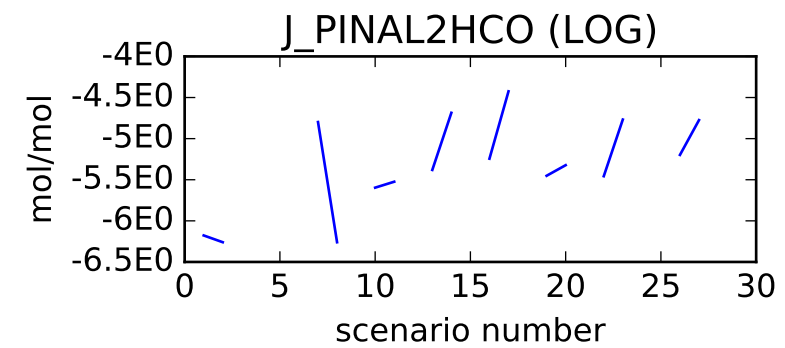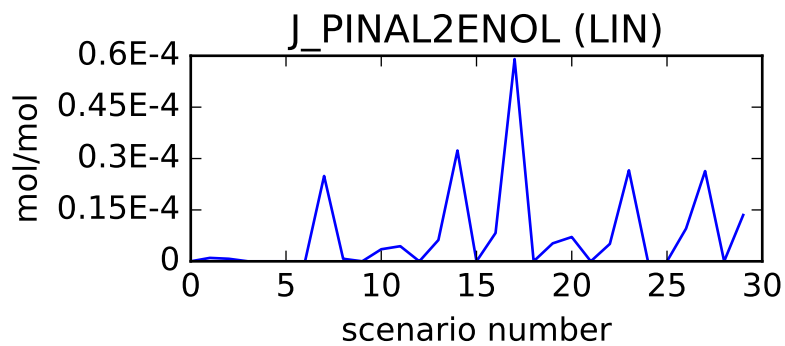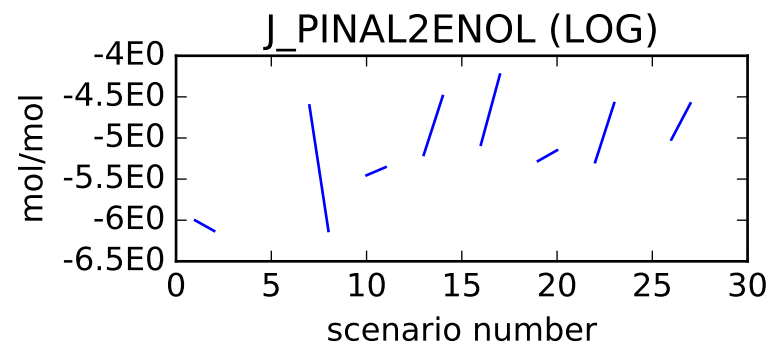

Supplement: Supplementary file 18 [file gmd-2018-201-supplement.zip]
