# Supplementary material for: The atmospheric chemistry box model CAABA/MECCA-4.0gmdd
Source: Copernicus journal article supplement (doi:10.5194/gmd-2018-201), 2018-09-03

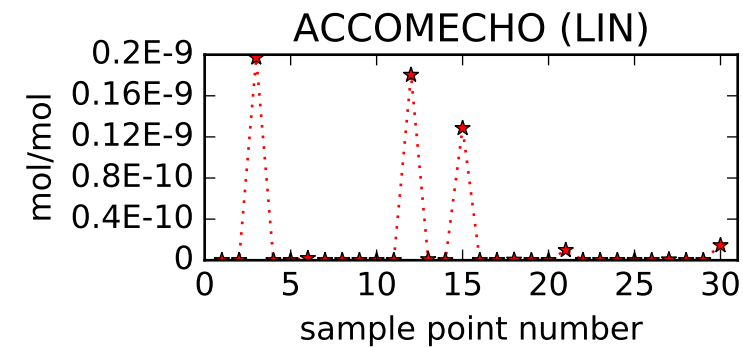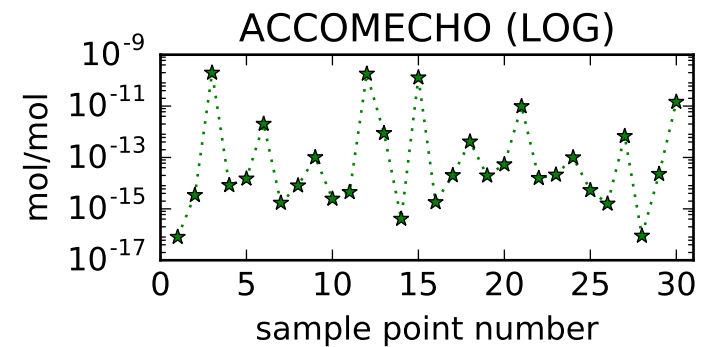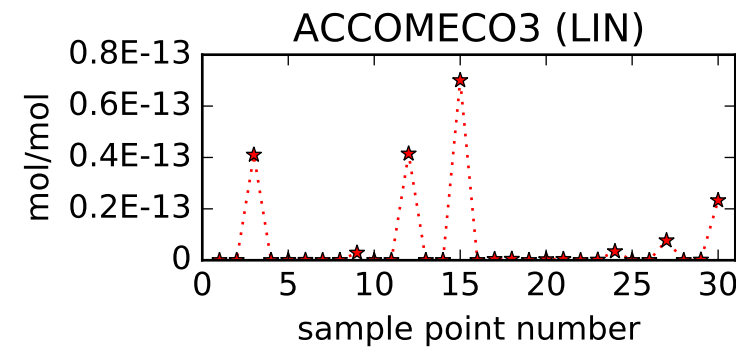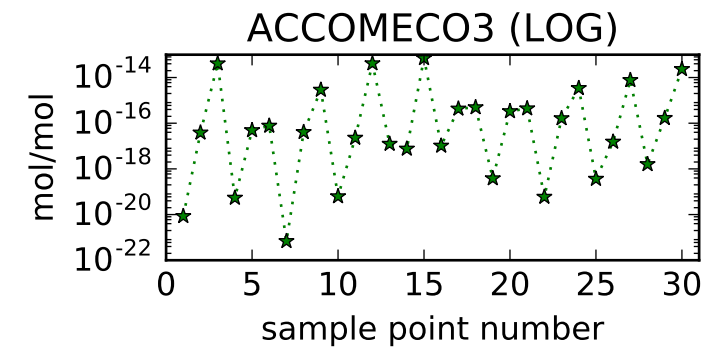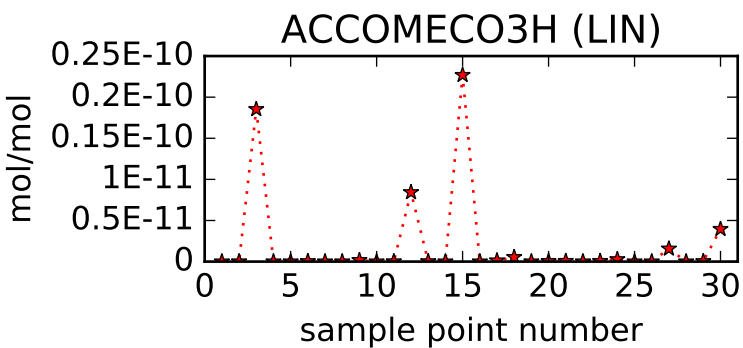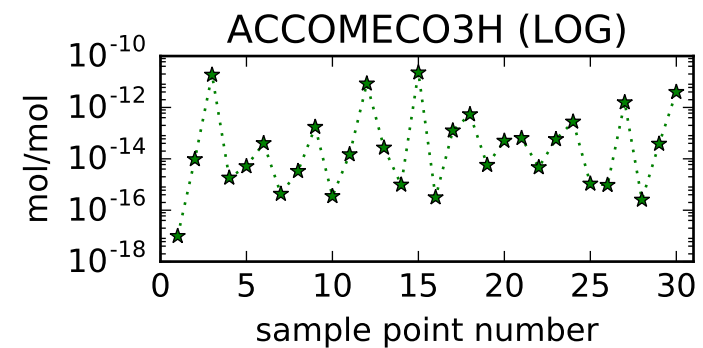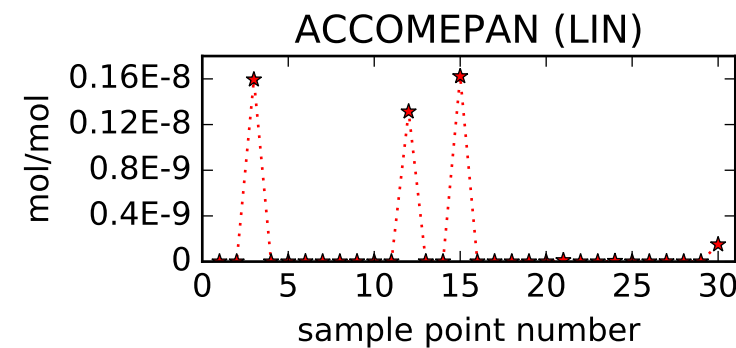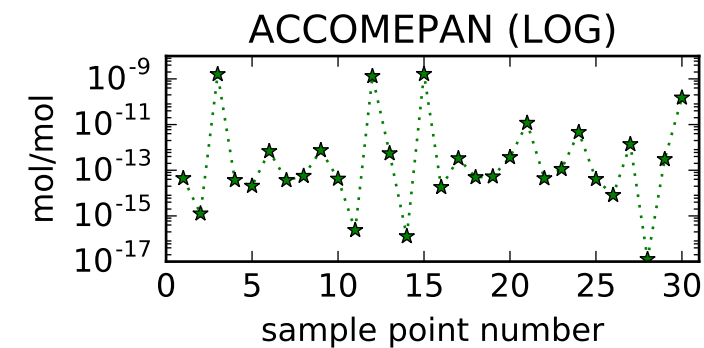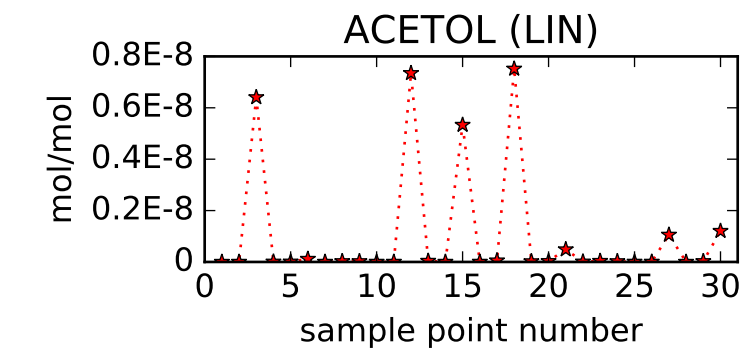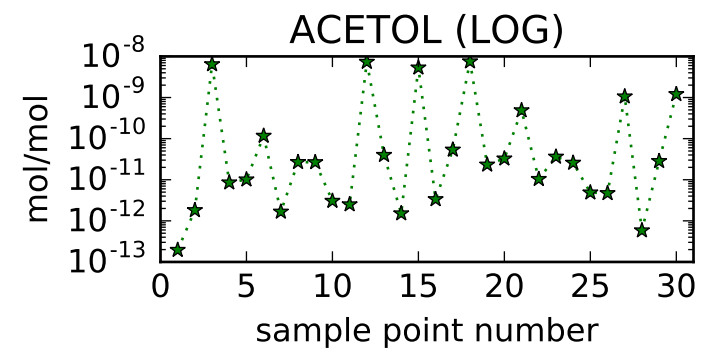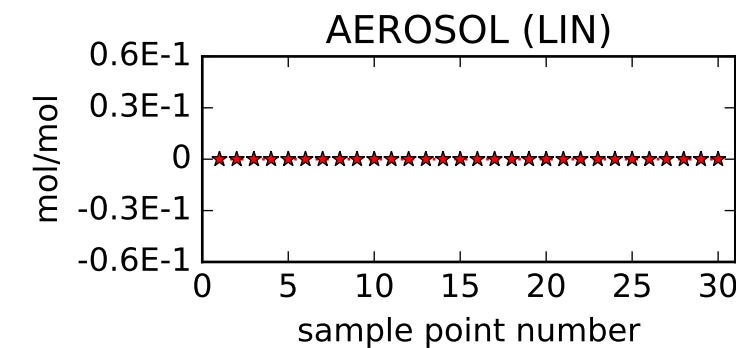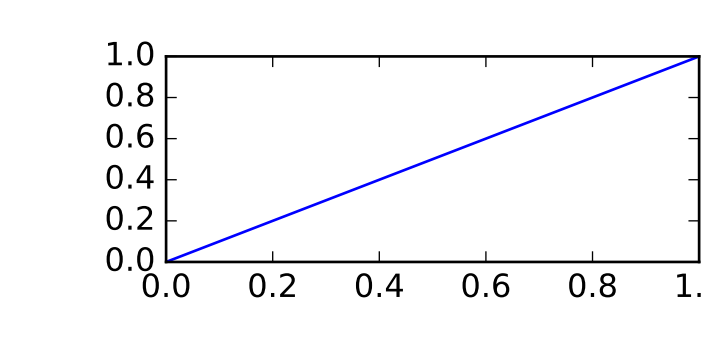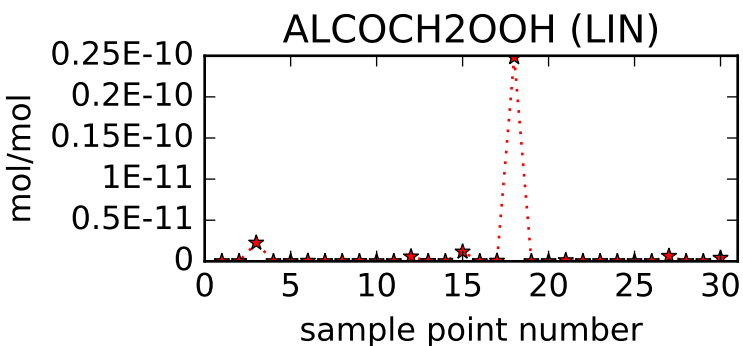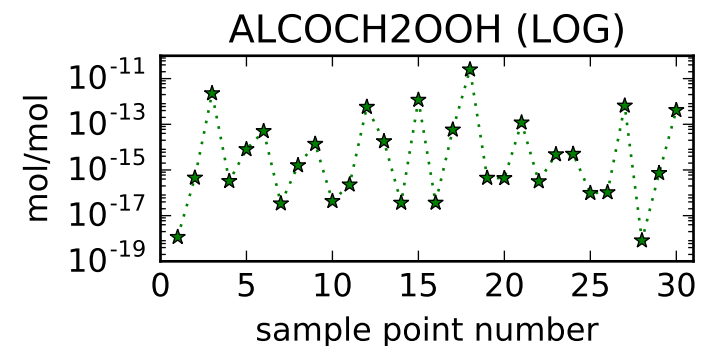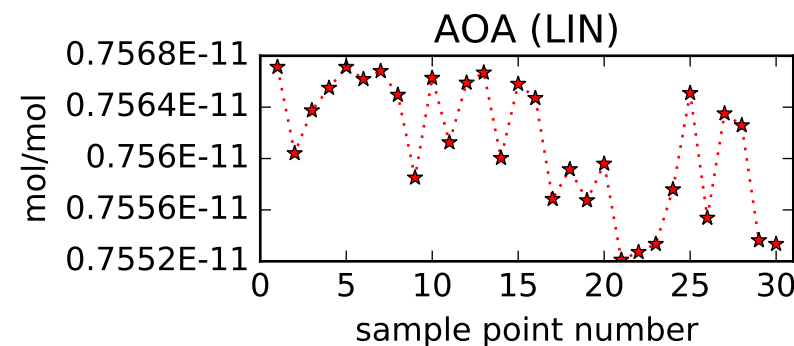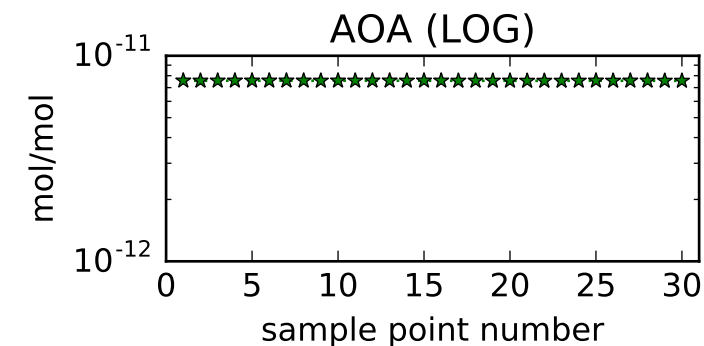

APINAOO (LIN)

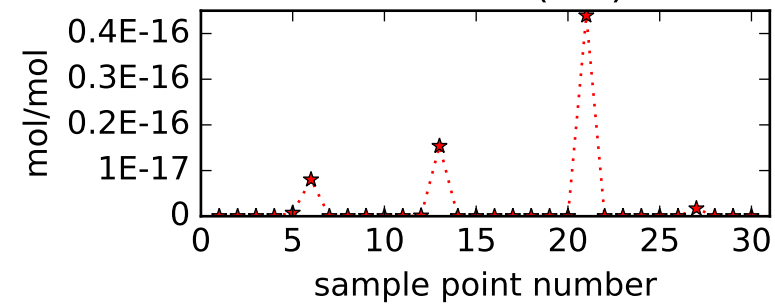

APINAOO (LOG)

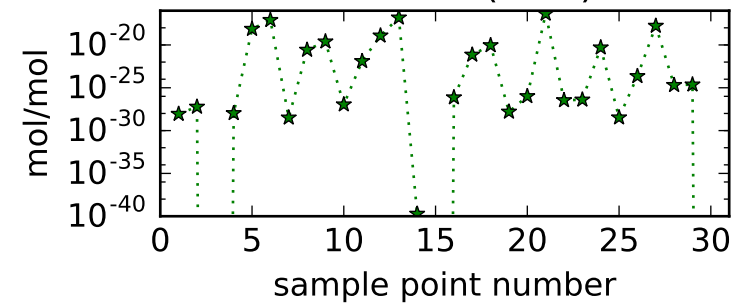

APINBOO (LIN)

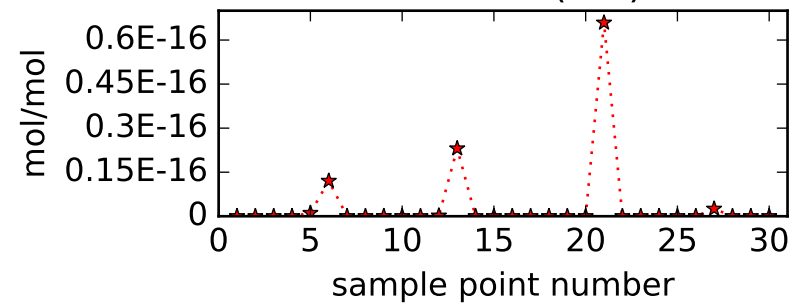

APINBOO (LOG)

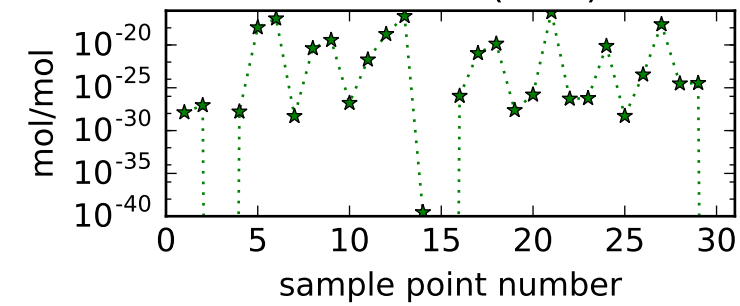

APINENE (LIN)

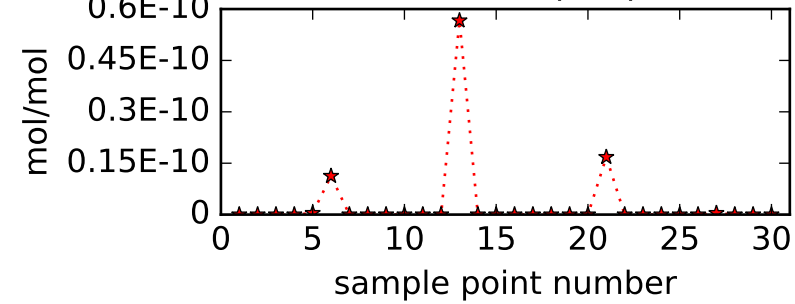

APINENE (LOG)

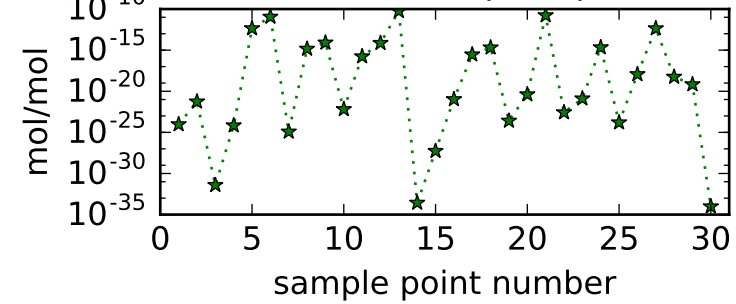

BENZAL (LIN)

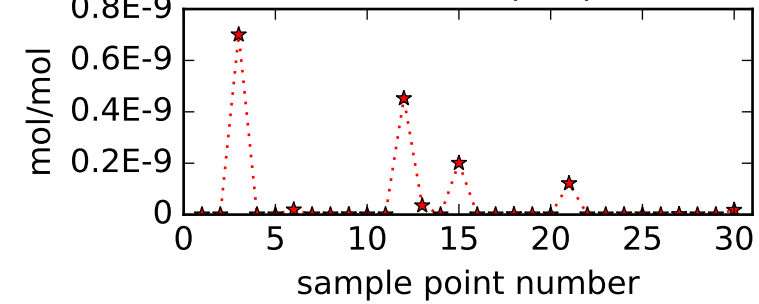

BENZAL (LOG)

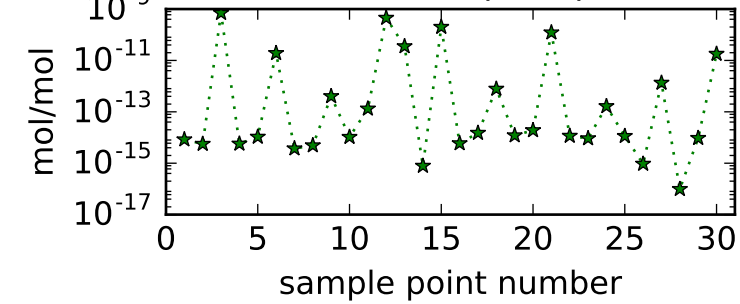

BENZENE (LIN)

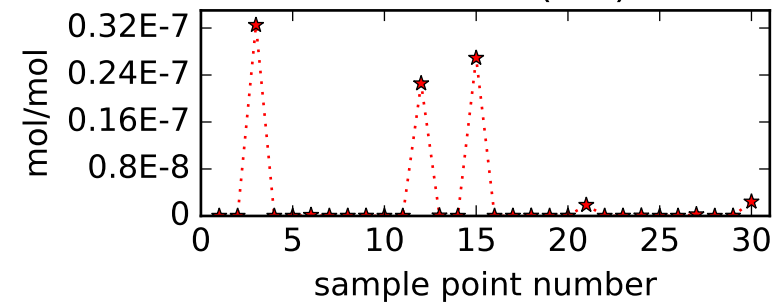

BENZENE (LOG)

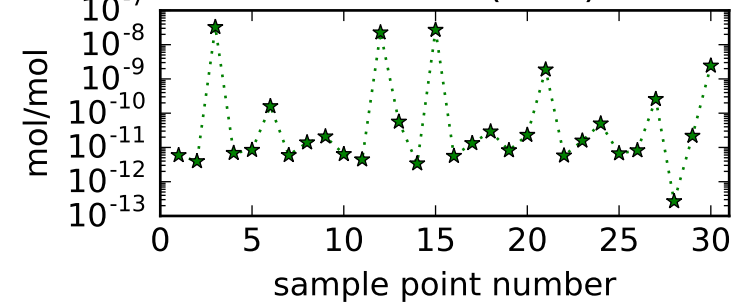

BIACET (LIN)

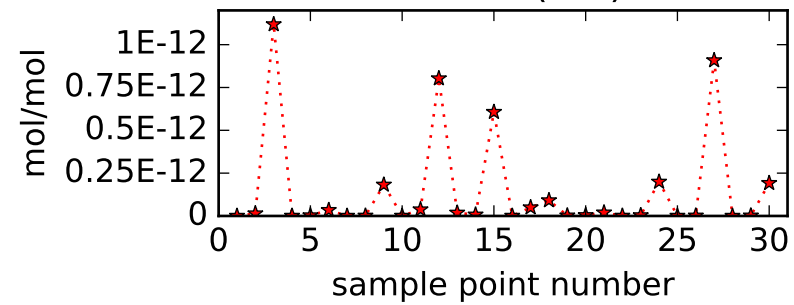

BIACET (LOG)

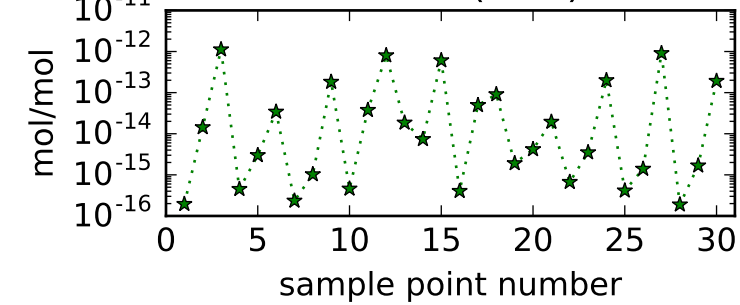

BIACETO2 (LIN)

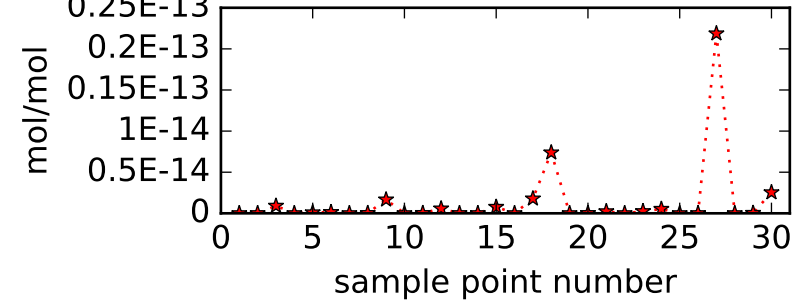

BIACETO2 (LOG)

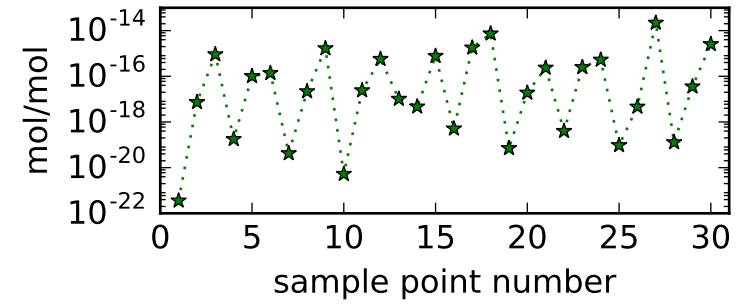

BIACETOH (LIN)

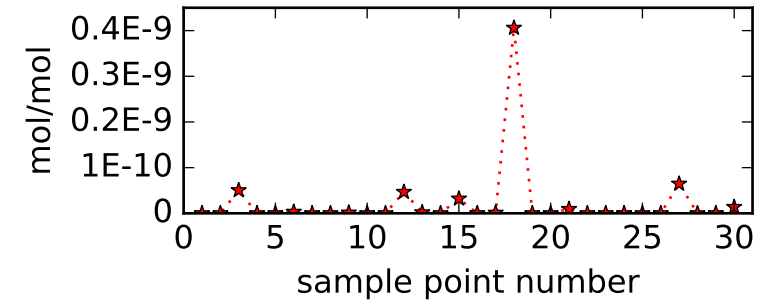

BIACETOH (LOG)

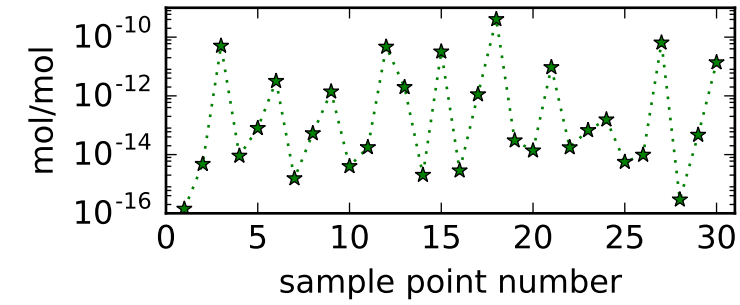

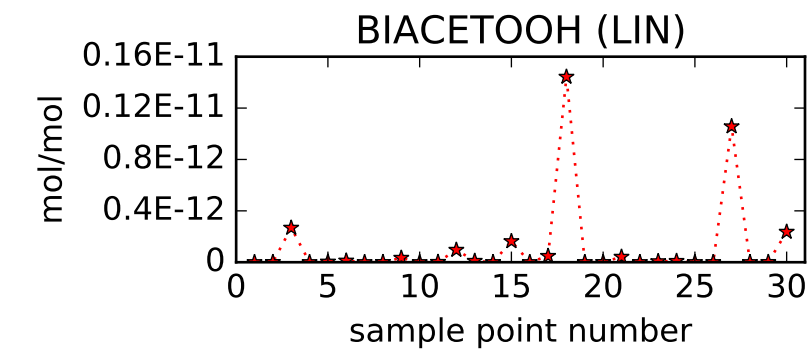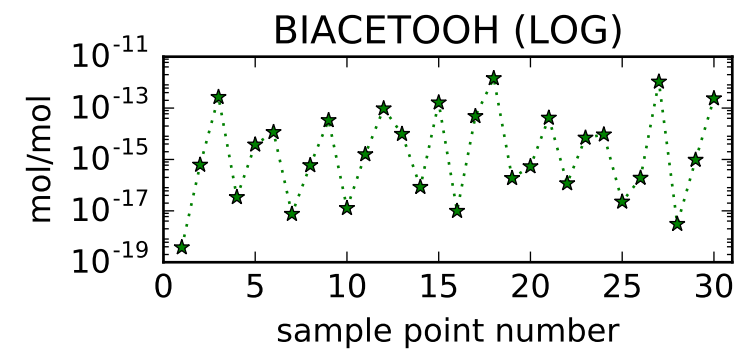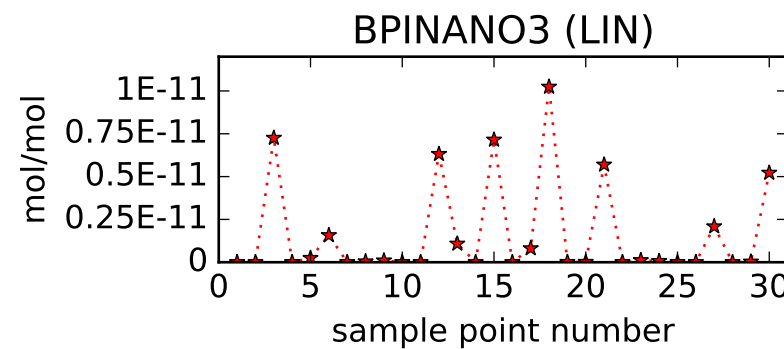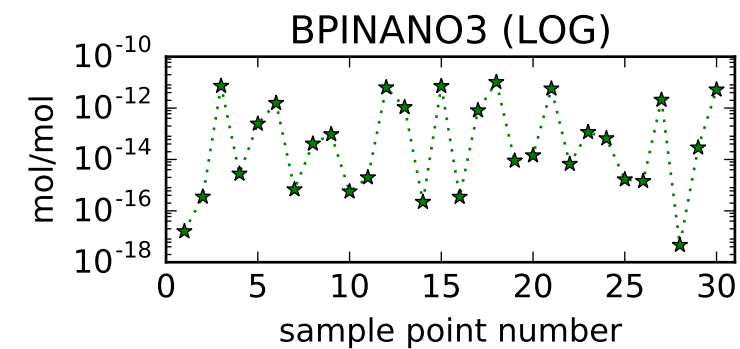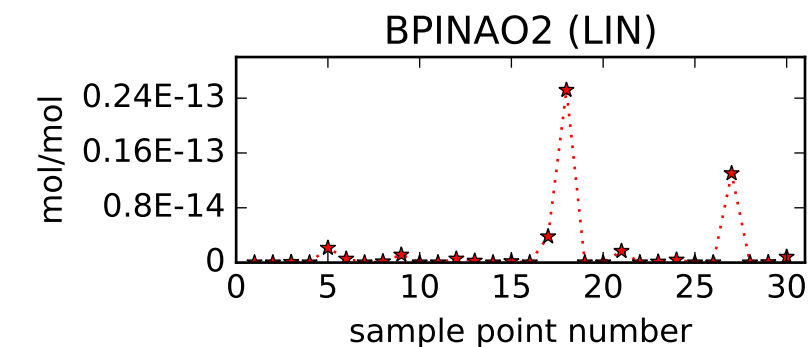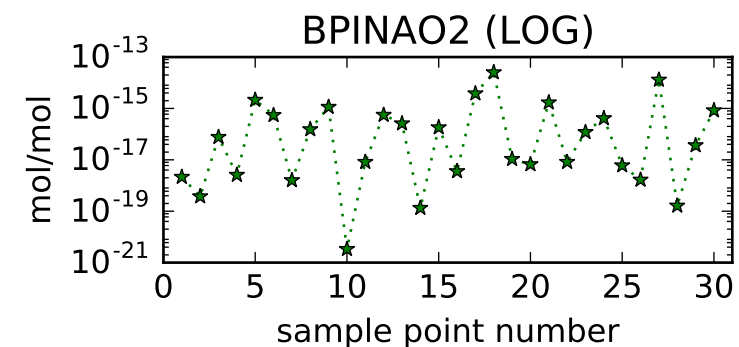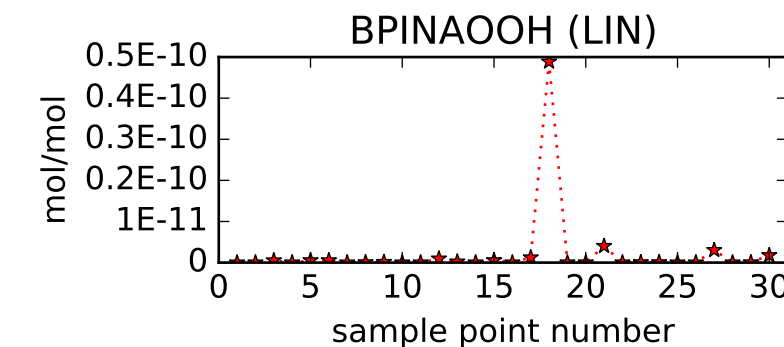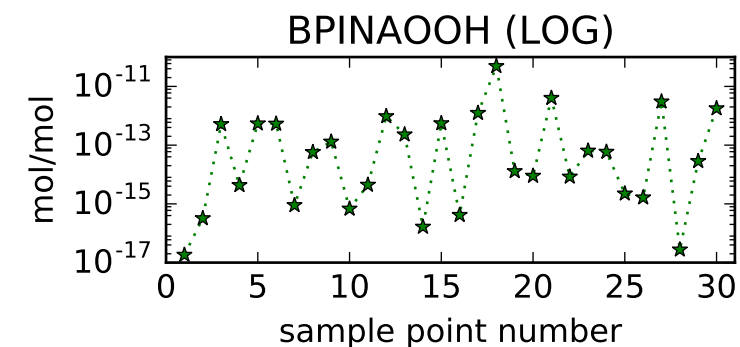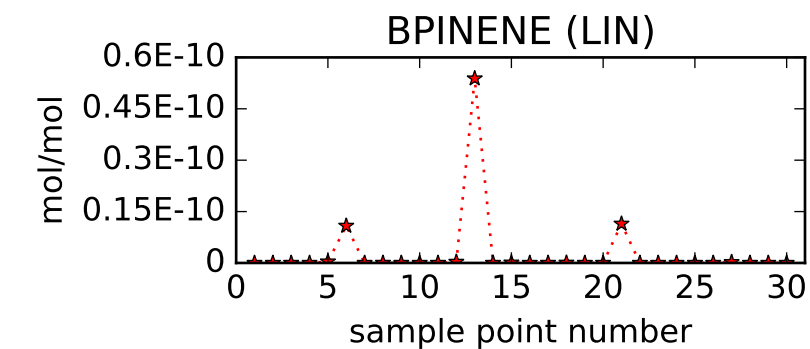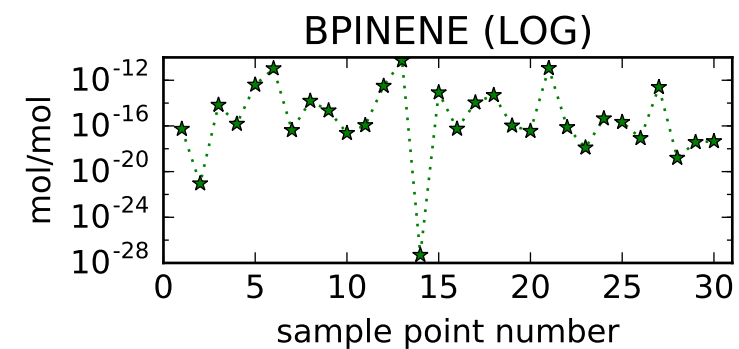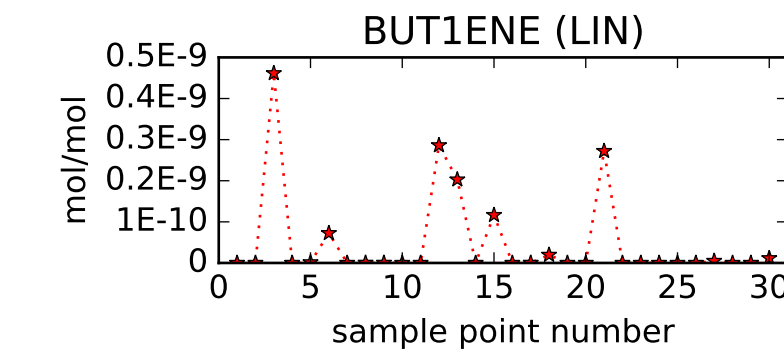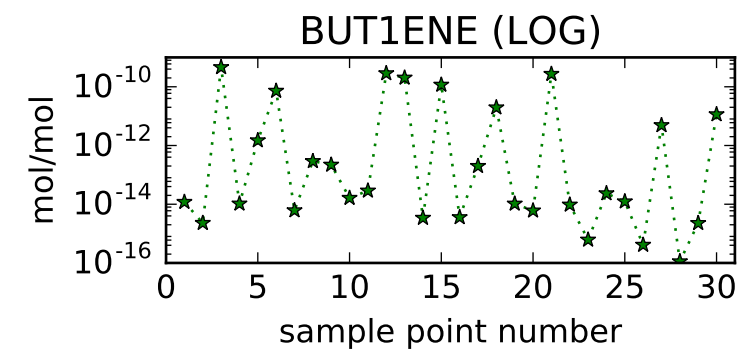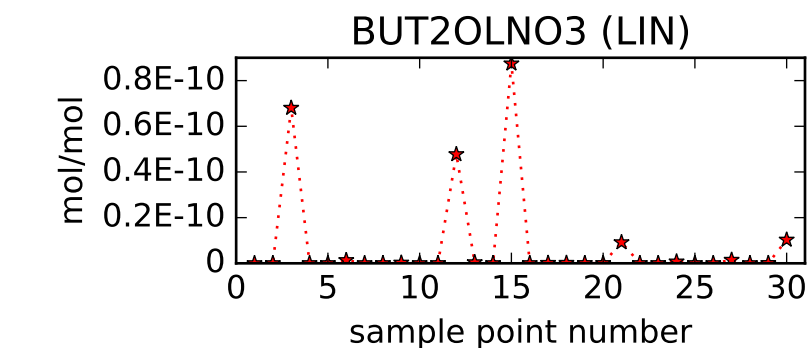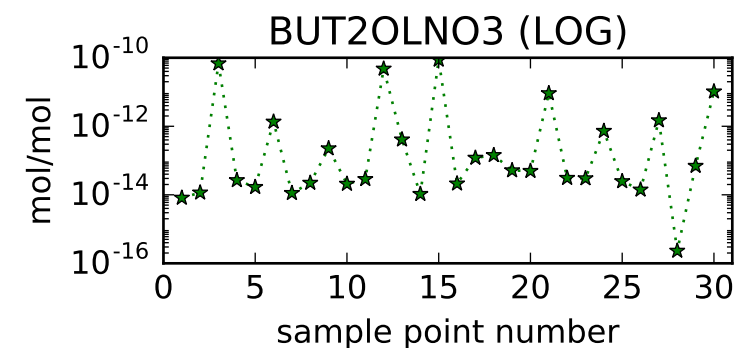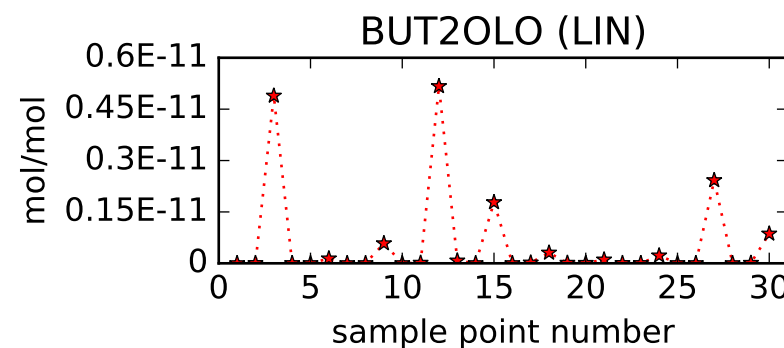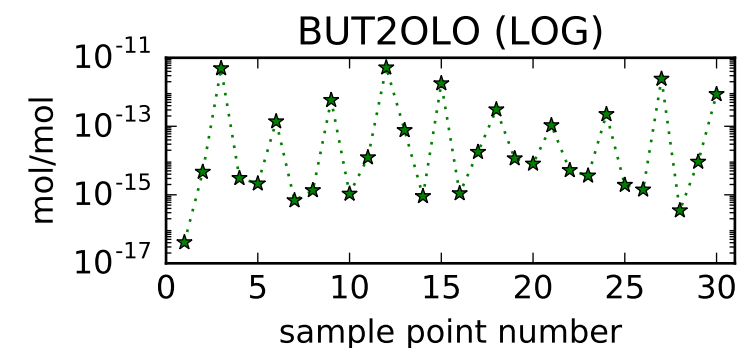

BUT2OLO2 (LIN)

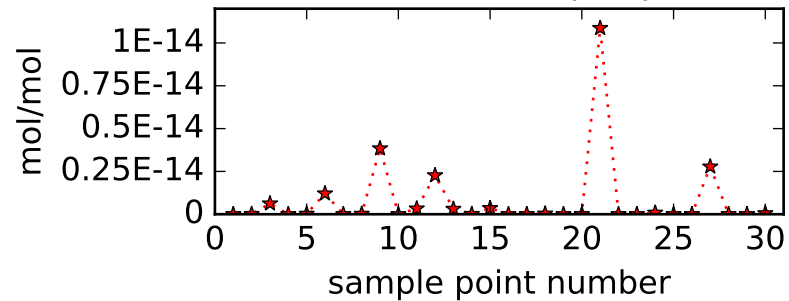

BUT2OLO2 (LOG)

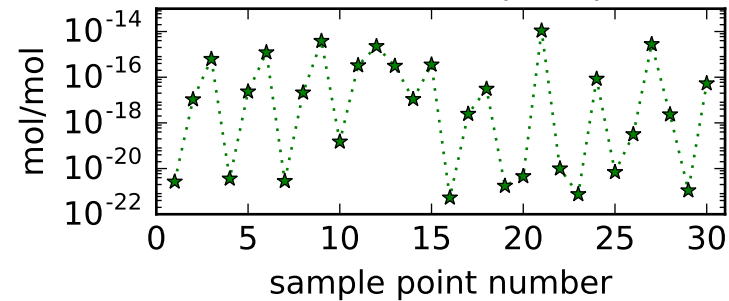

BUT2OLOOH (LIN)

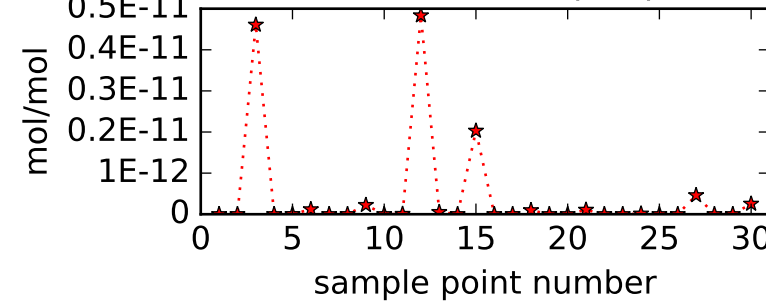

BUT2OLOOH (LOG)

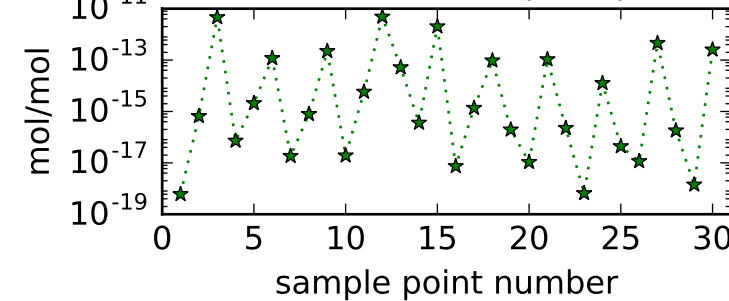

BUTENOL (LIN)

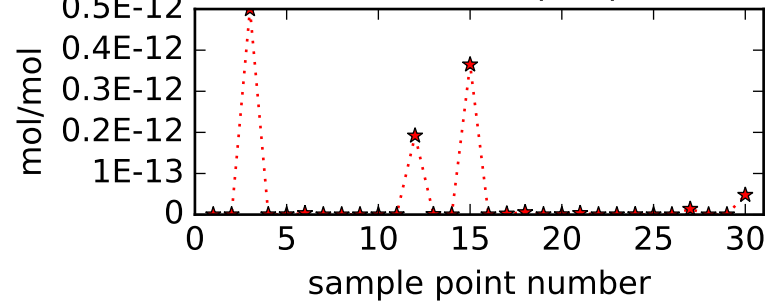

BUTENOL (LOG)

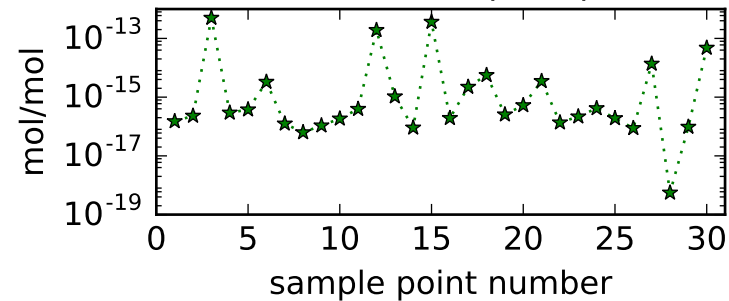

BZBIPERNO3 (LIN)

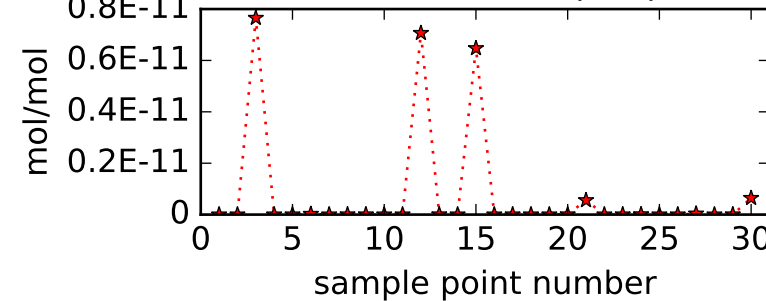

BZBIPERNO3 (LOG)

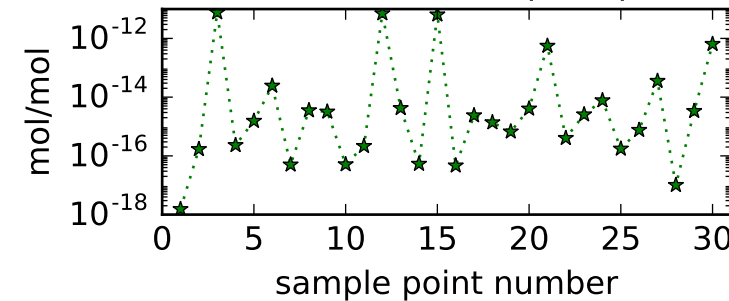

BZBIPERO2 (LIN)

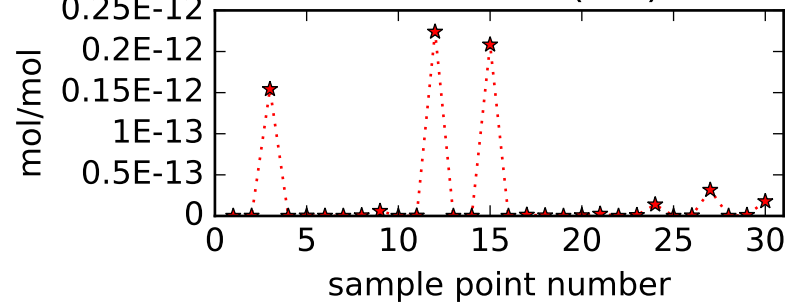

BZBIPERO2 (LOG)

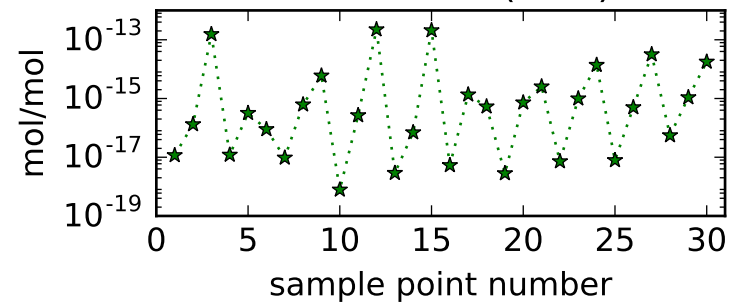

BZBIPEROOH (LIN)

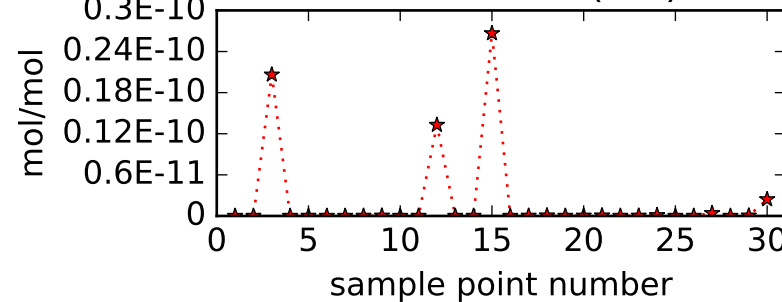

BZBIPEROOH (LOG)

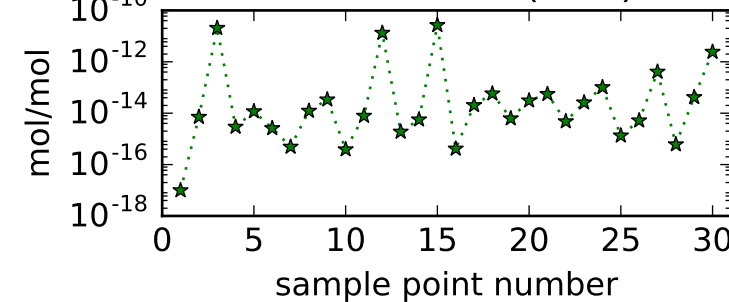

BZEMUCCO (LIN)

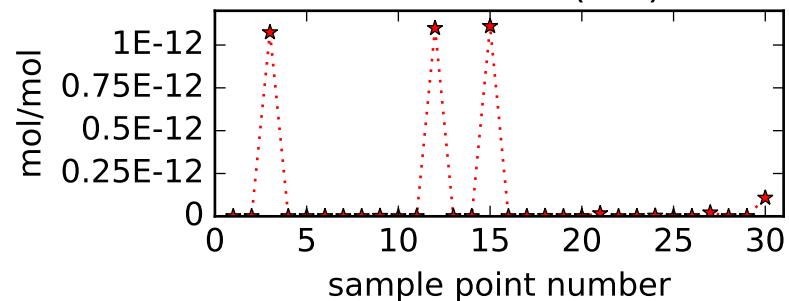

BZEMUCCO (LOG)

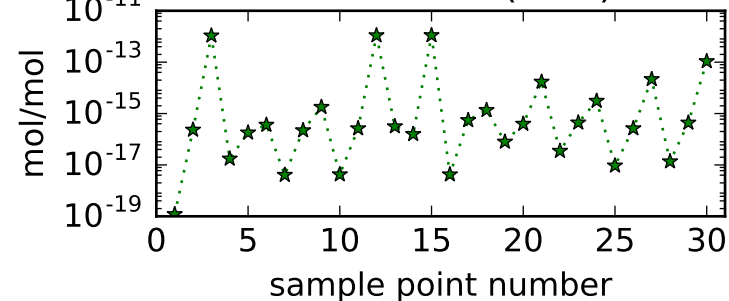

BZEMUCCO2H (LIN)

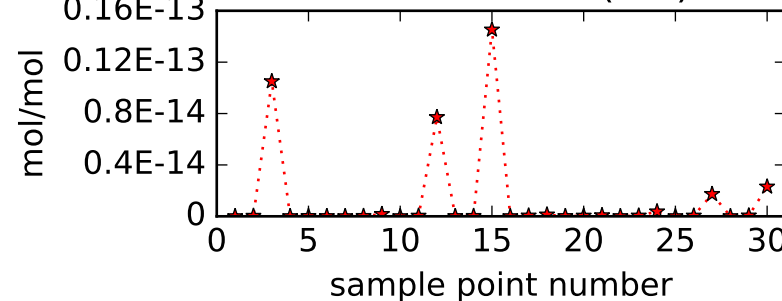

BZEMUCCO2H (LOG)

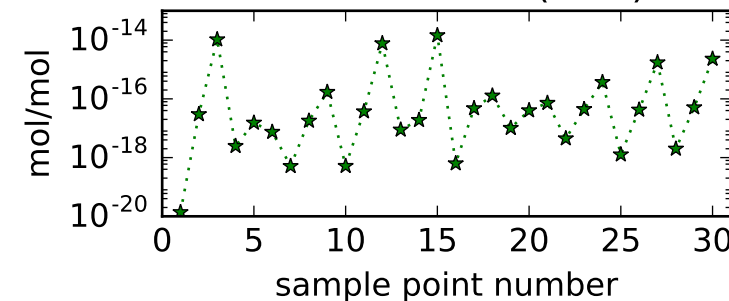

BZEMUCCO3 (LIN)

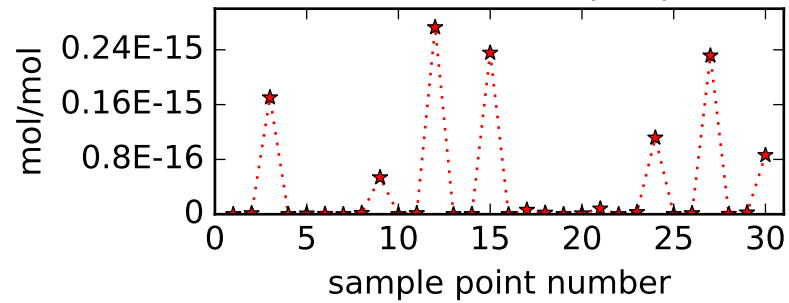

BZEMUCCO3 (LOG)

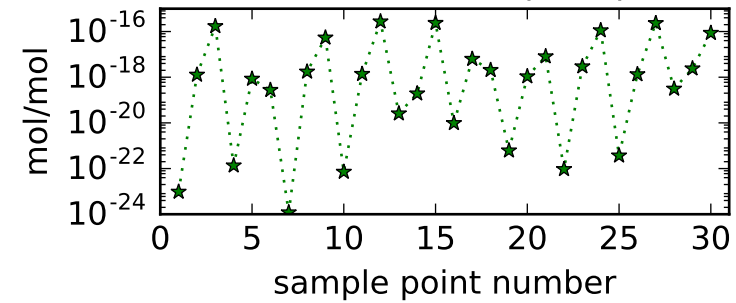

BZEMUCCO3H (LIN)

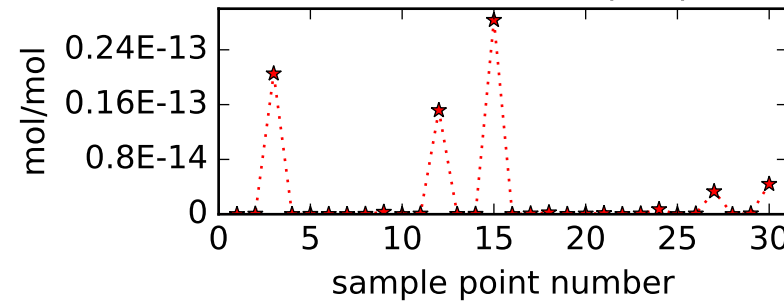

BZEMUCCO3H (LOG)

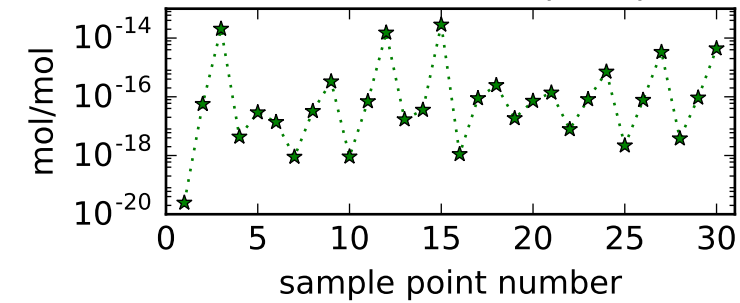

BZEMUCNO3 (LIN)

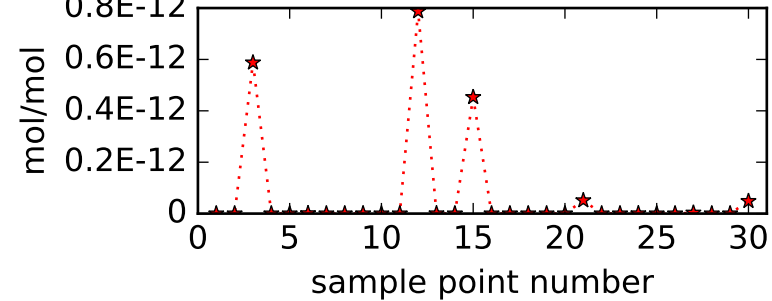

BZEMUCNO3 (LOG)

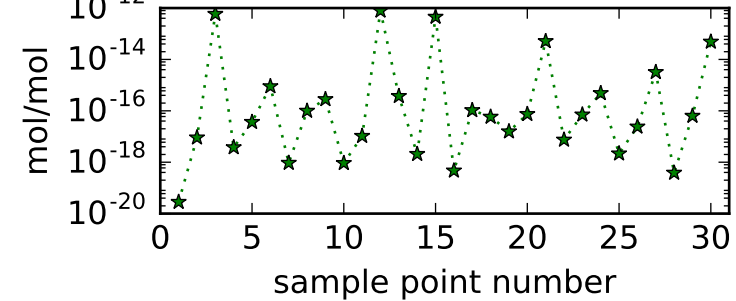

BZEMUCO2 (LIN)

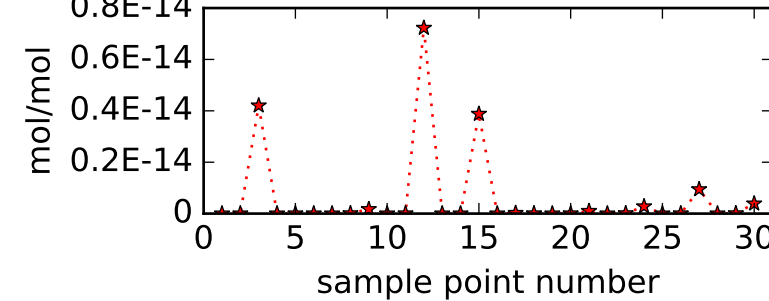

BZEMUCO2 (LOG)

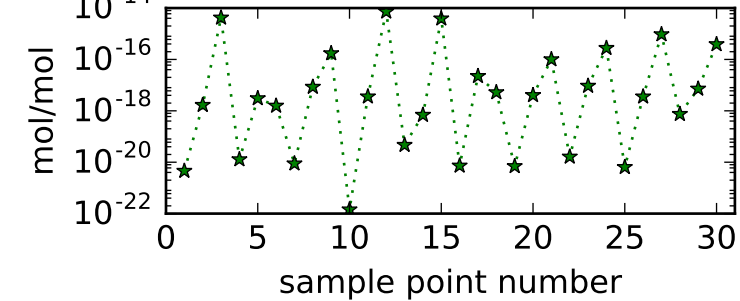

BZEMUCOOH (LIN)

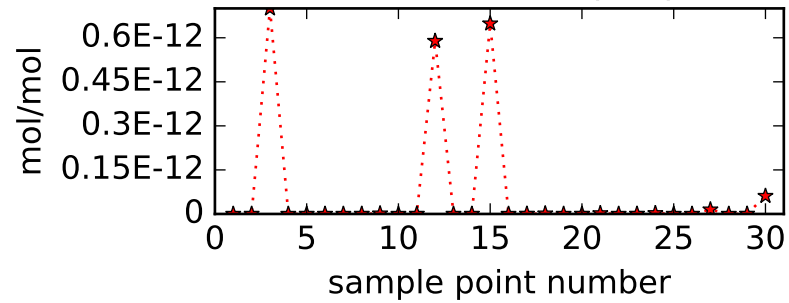

BZEMUCOOH (LOG)

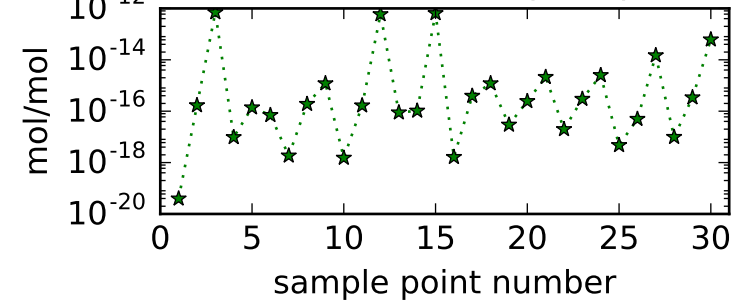

BZEMUCPAN (LIN)

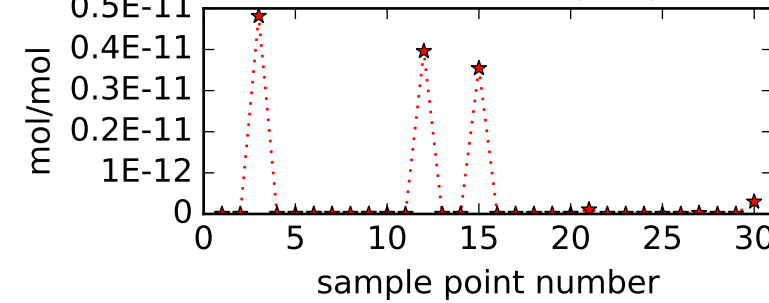

BZEMUCPAN (LOG)

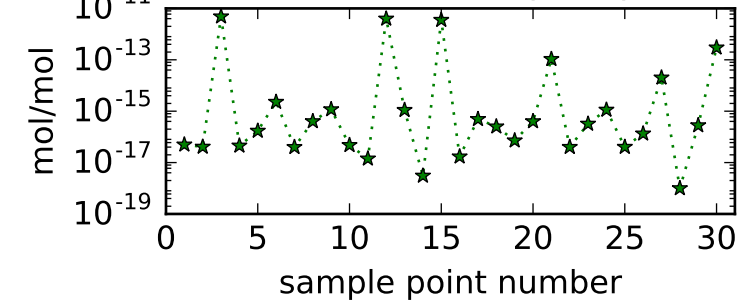

BZEPOXMUC (LIN)

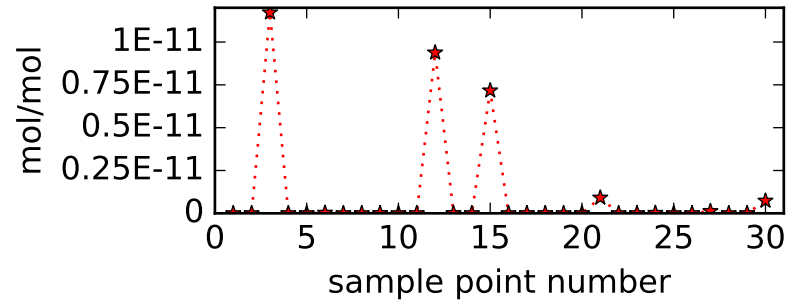

BZEPOXMUC (LOG)

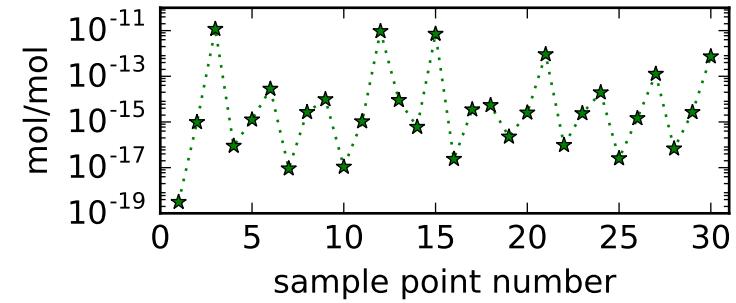

BZFUCO (LIN)

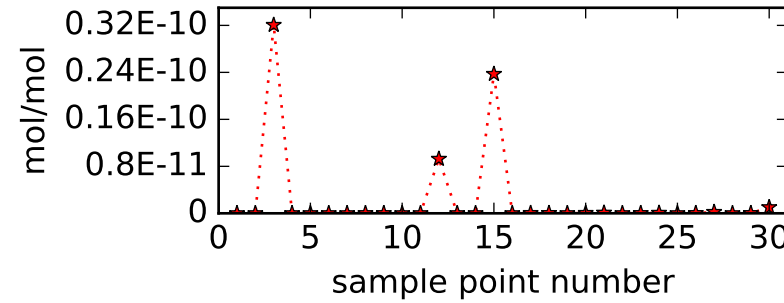

BZFUCO (LOG)

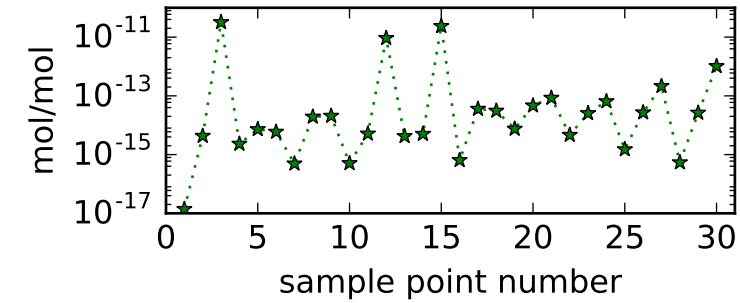



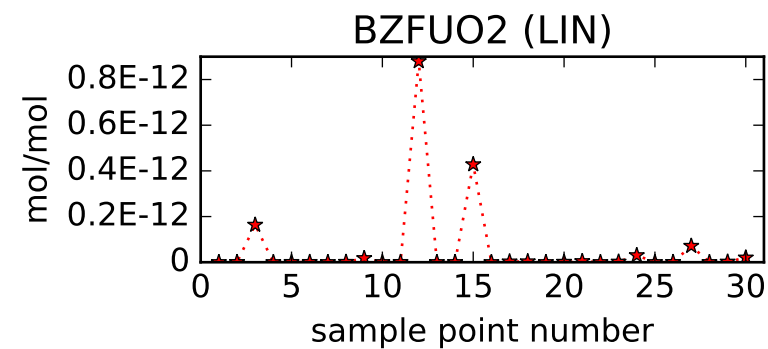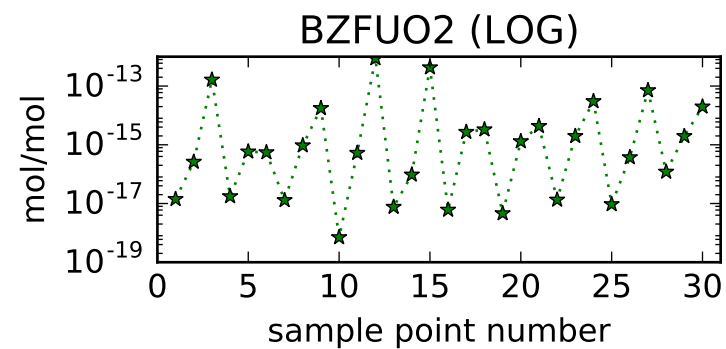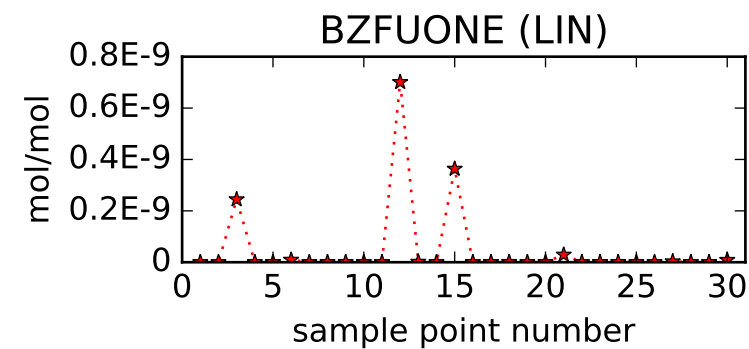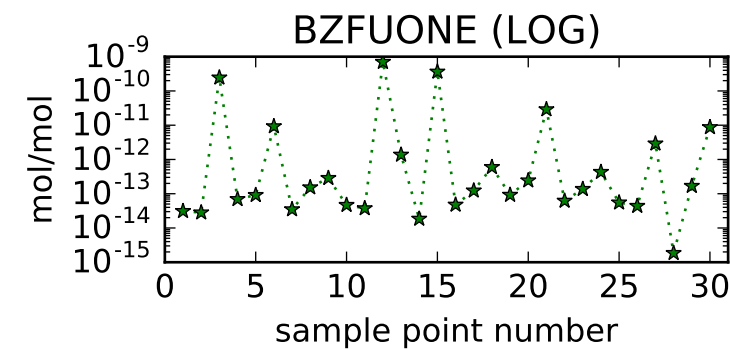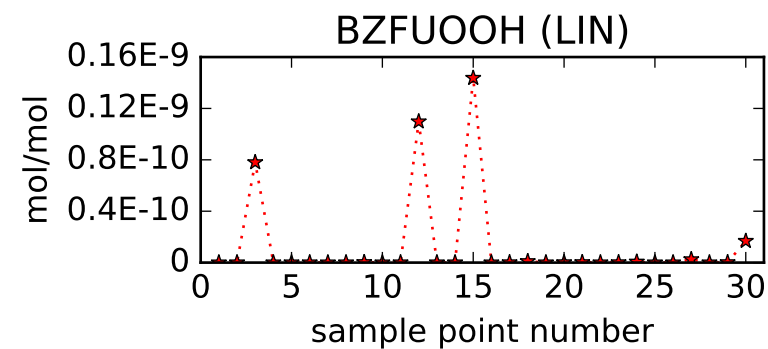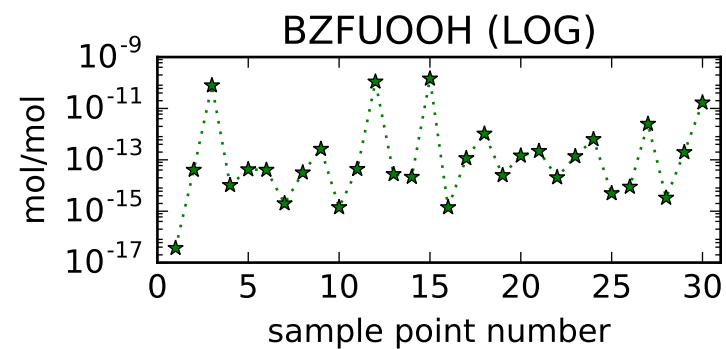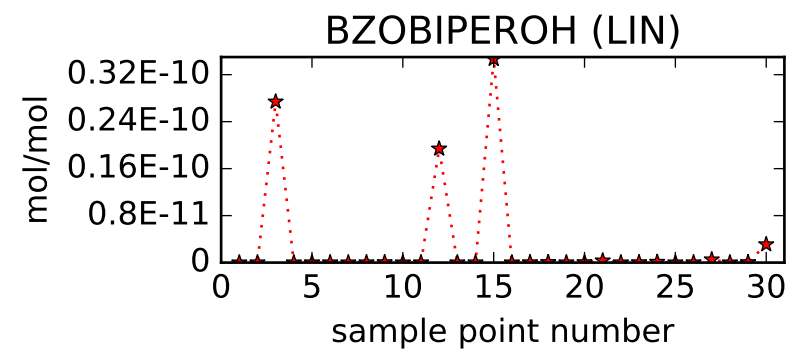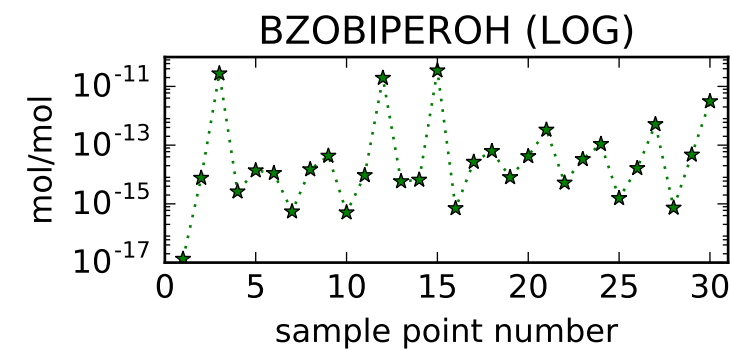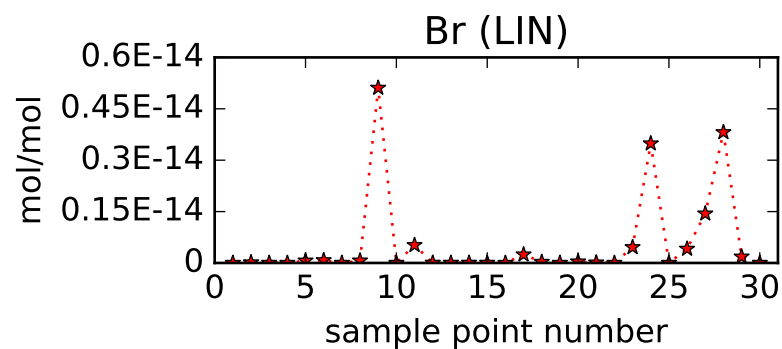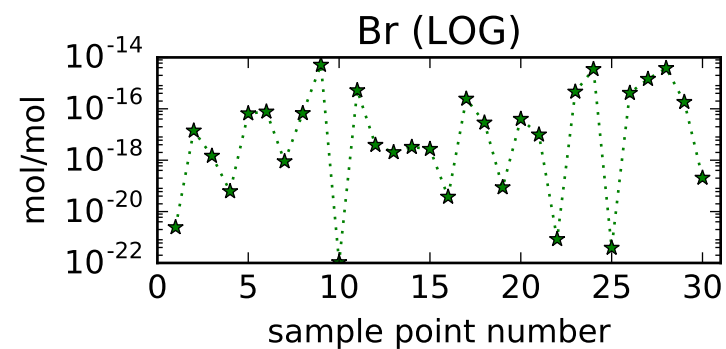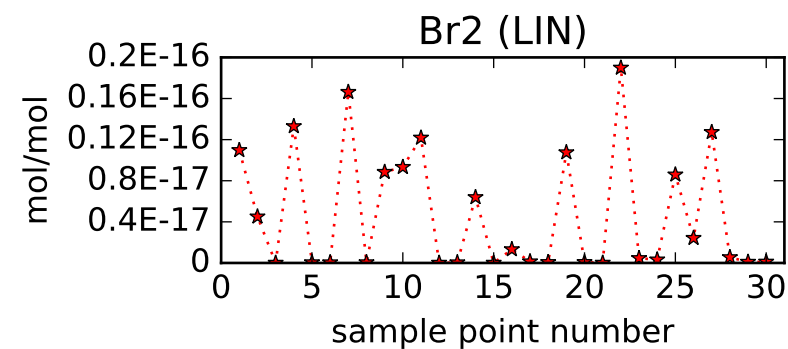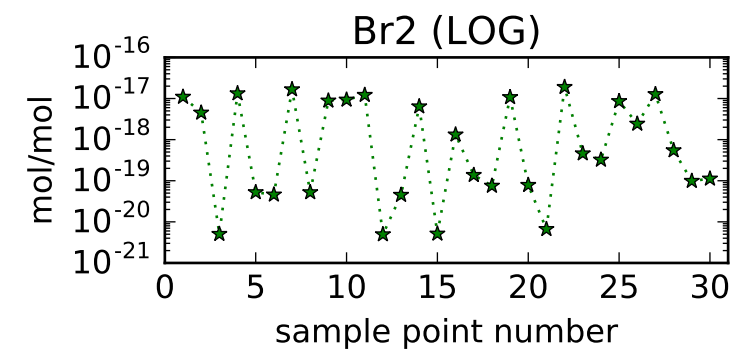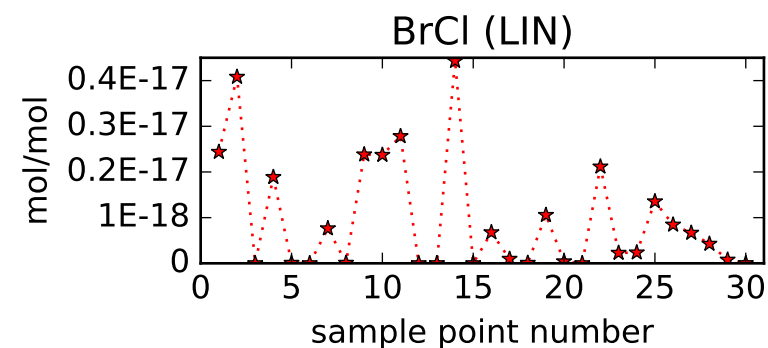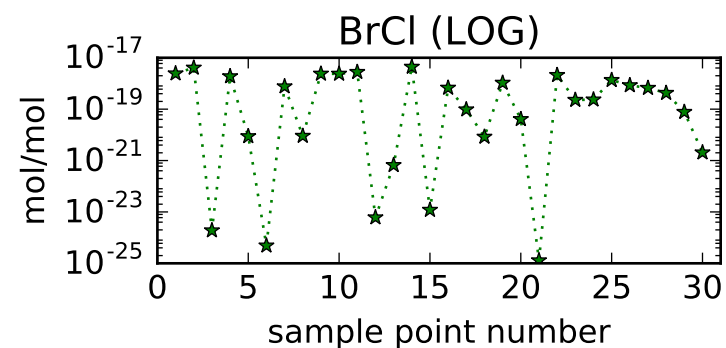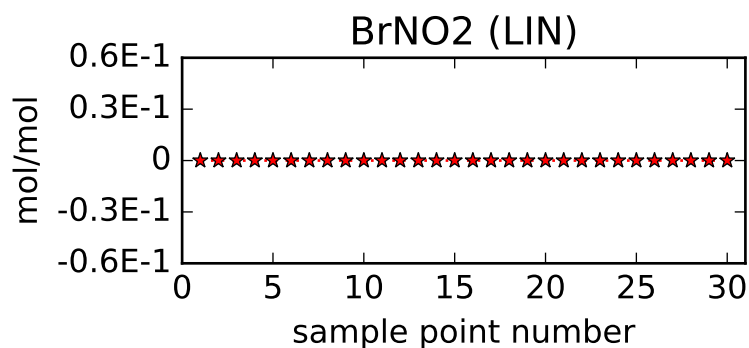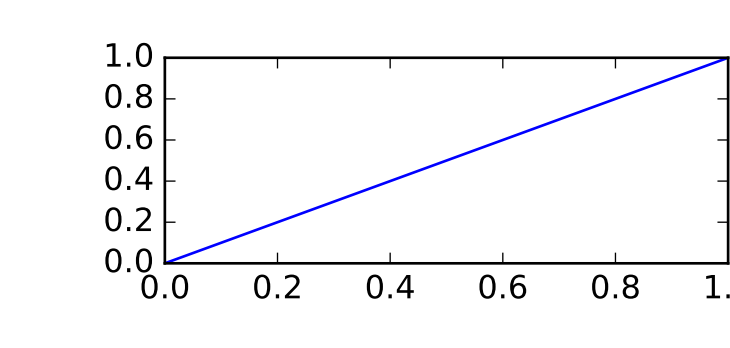

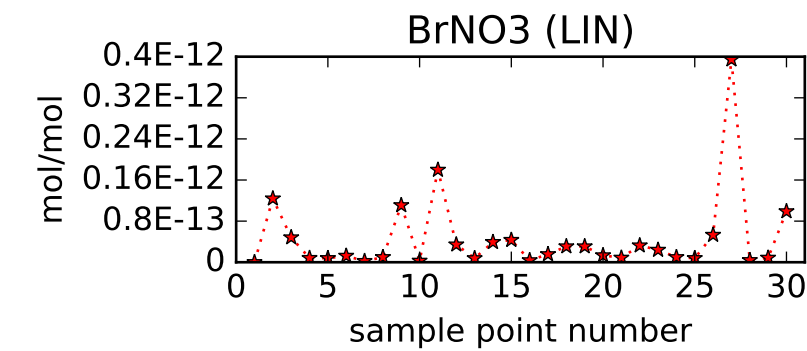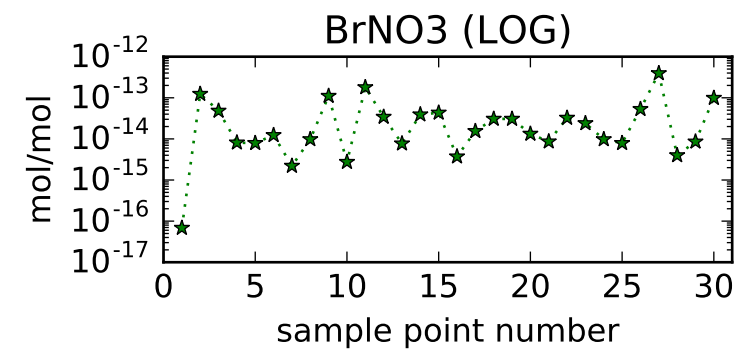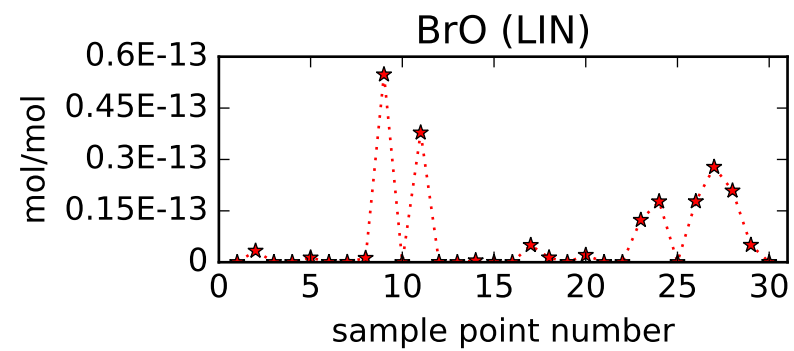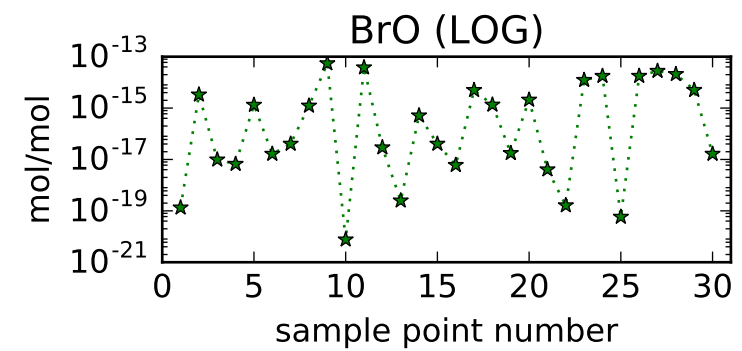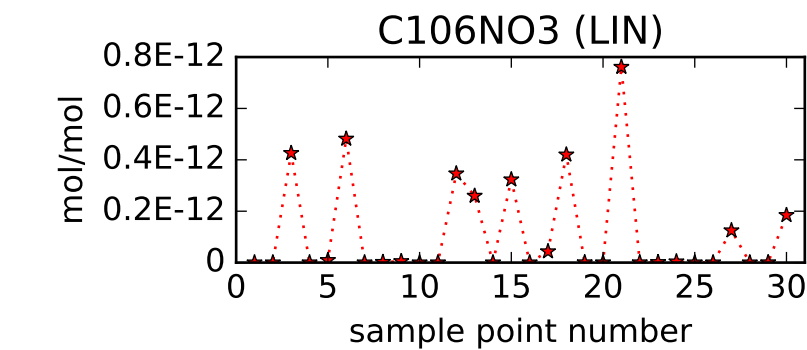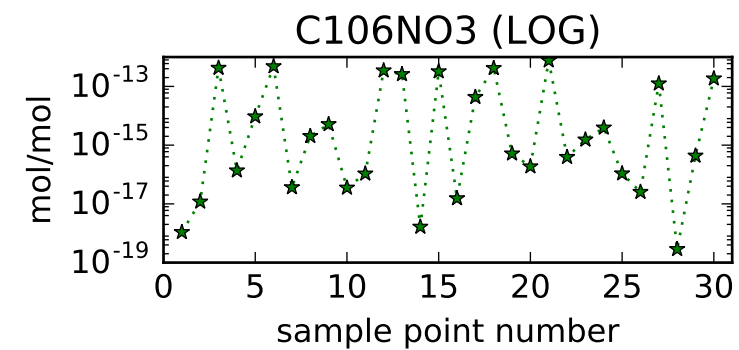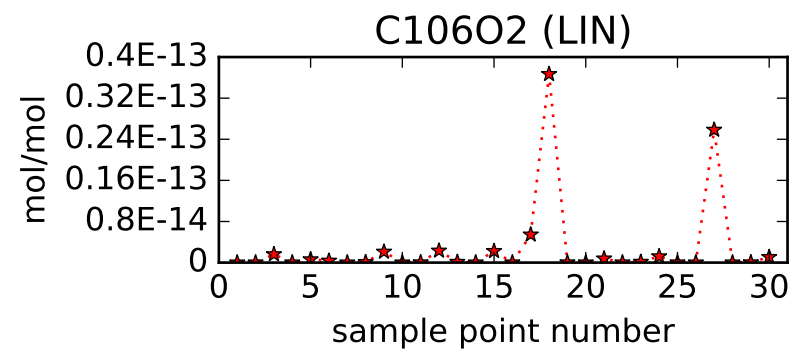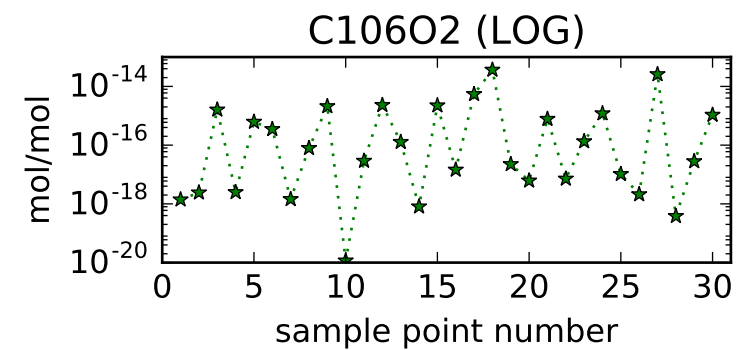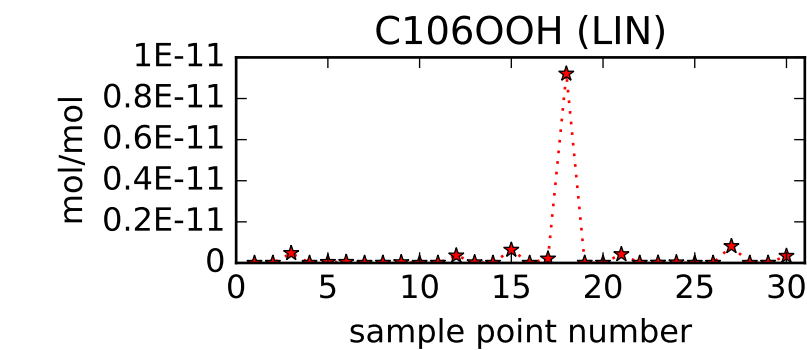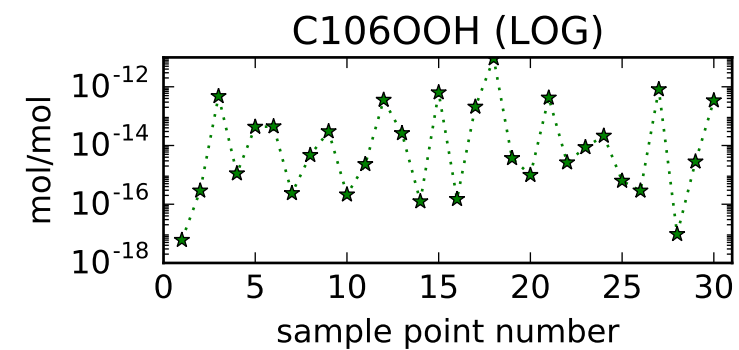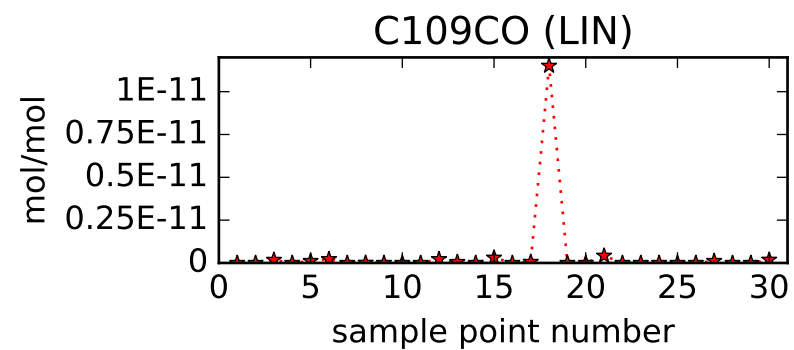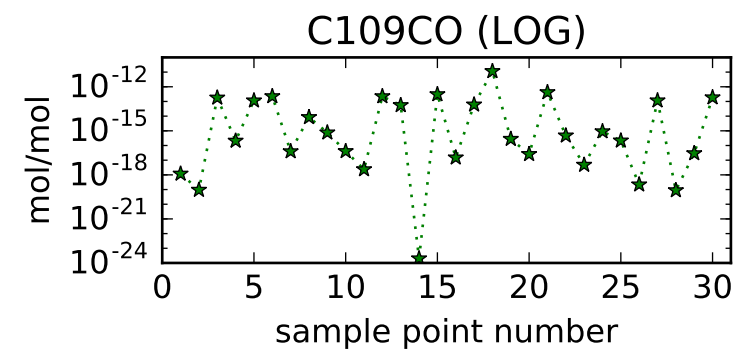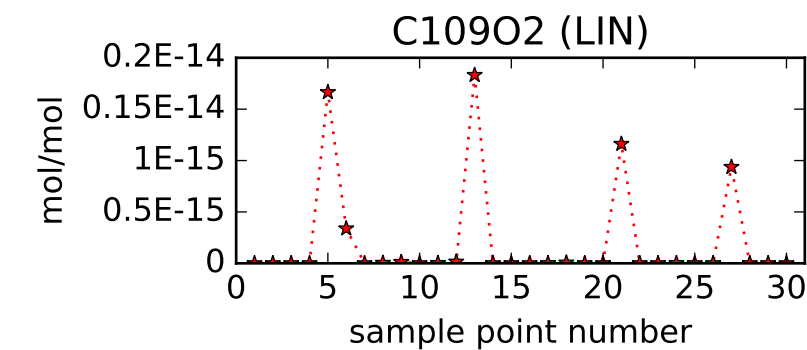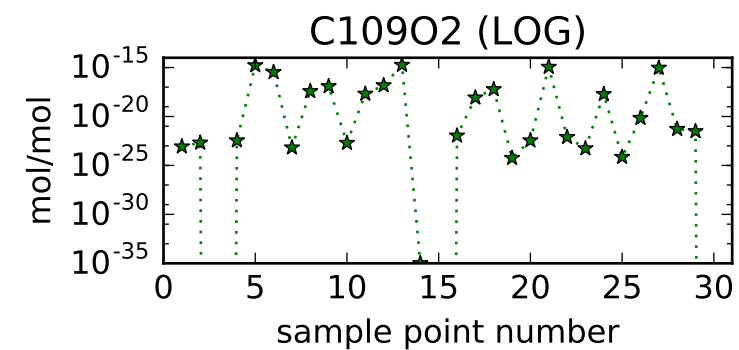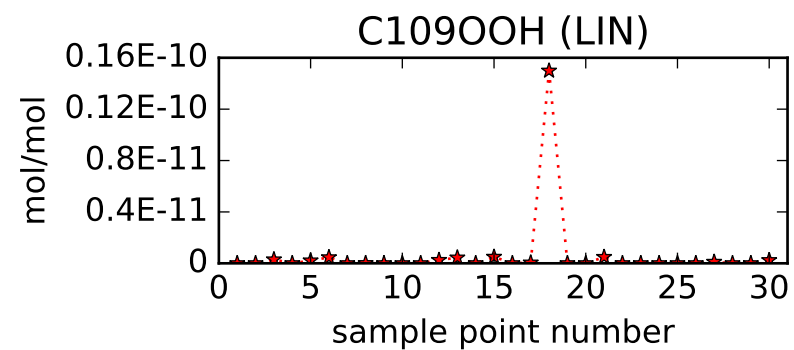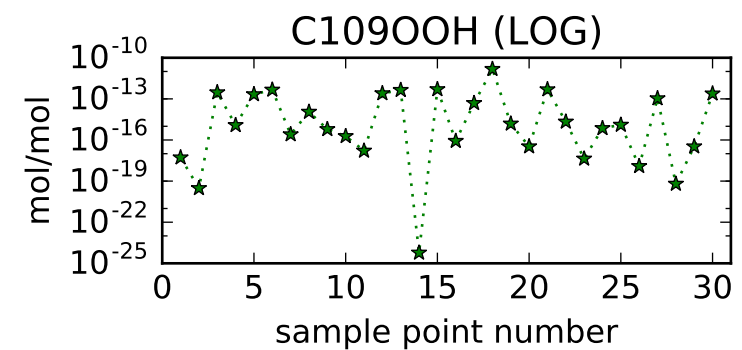

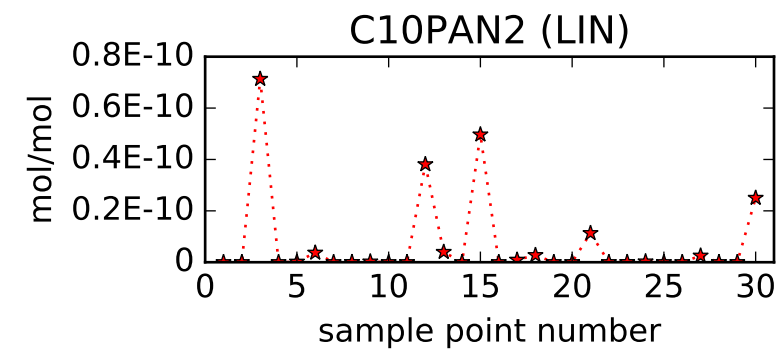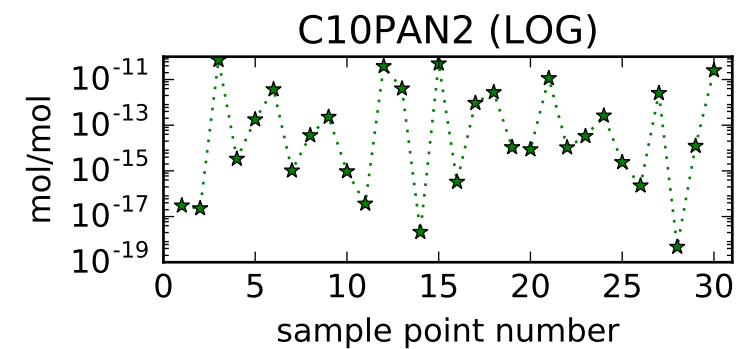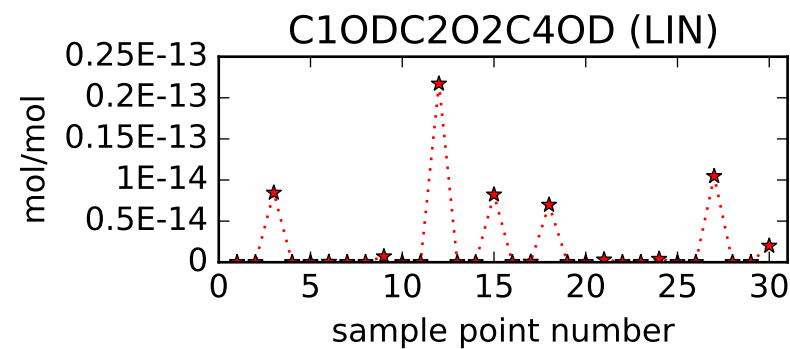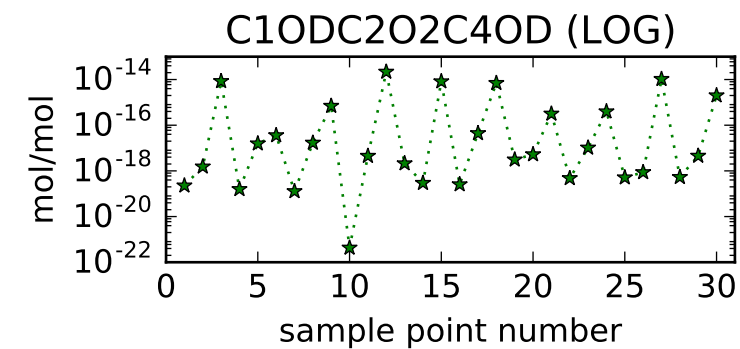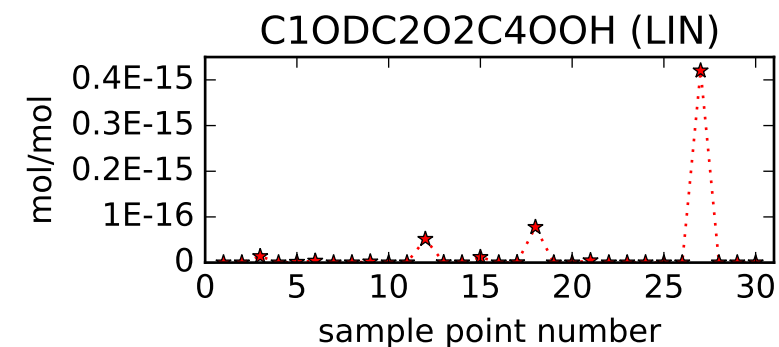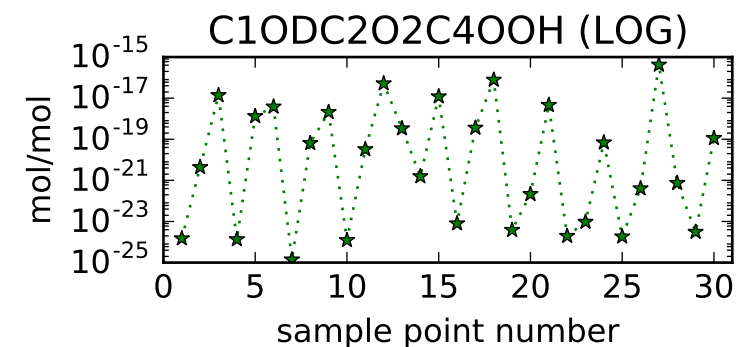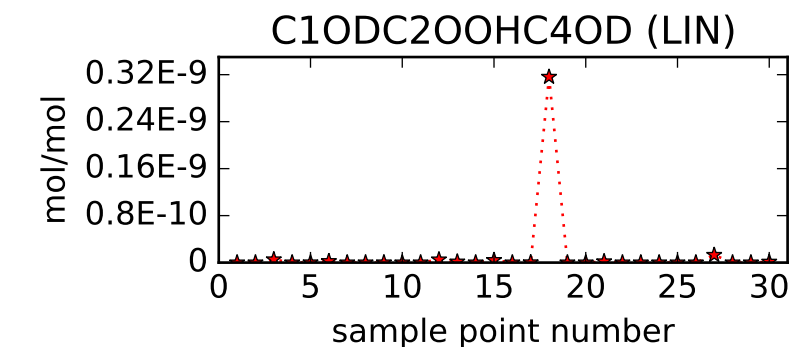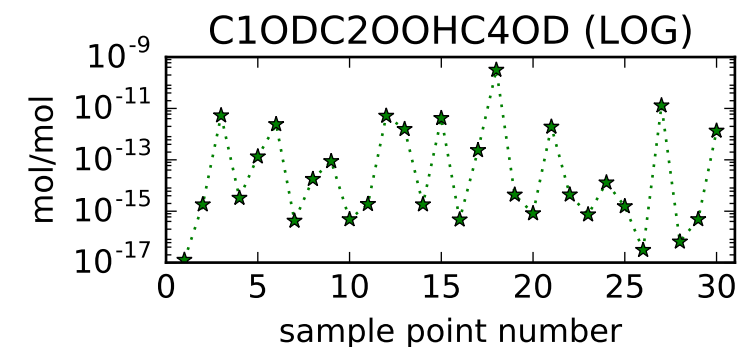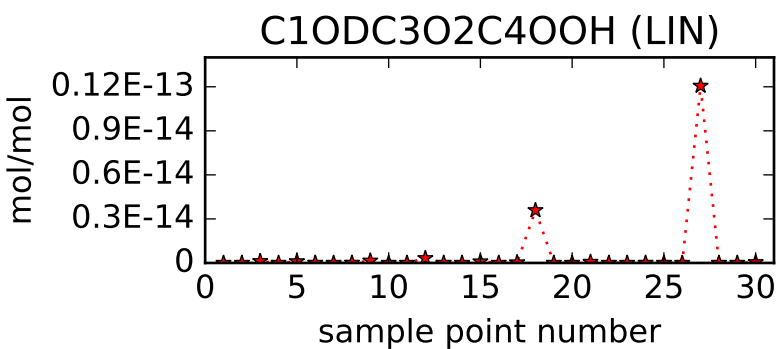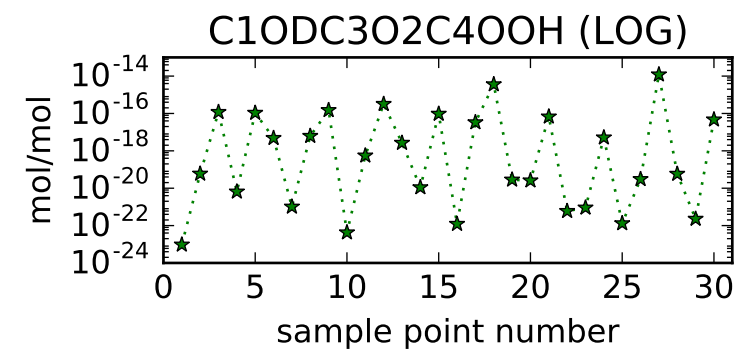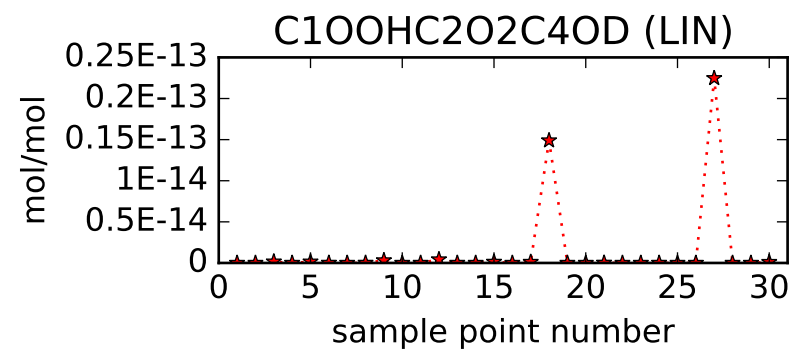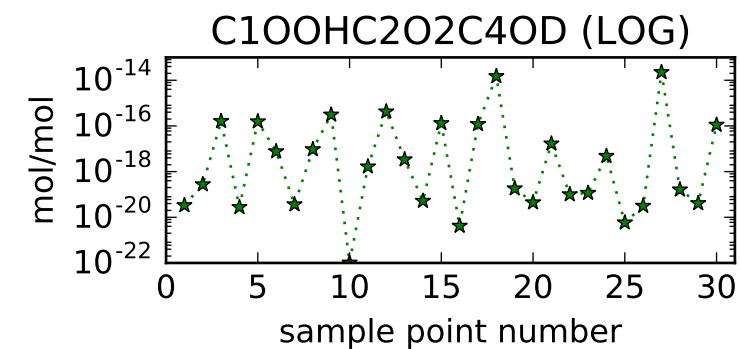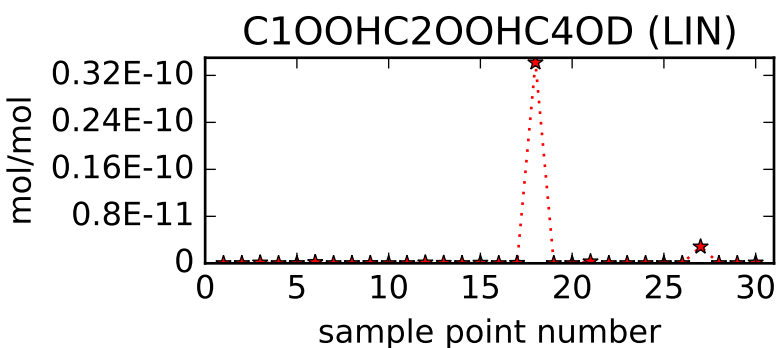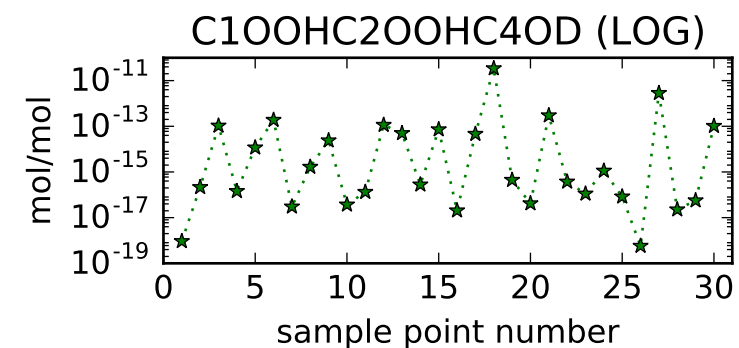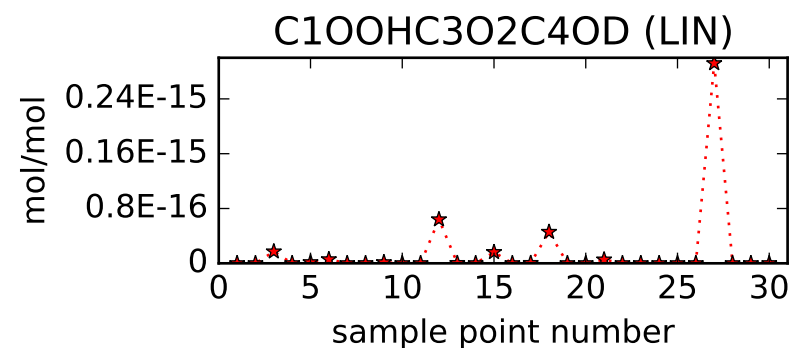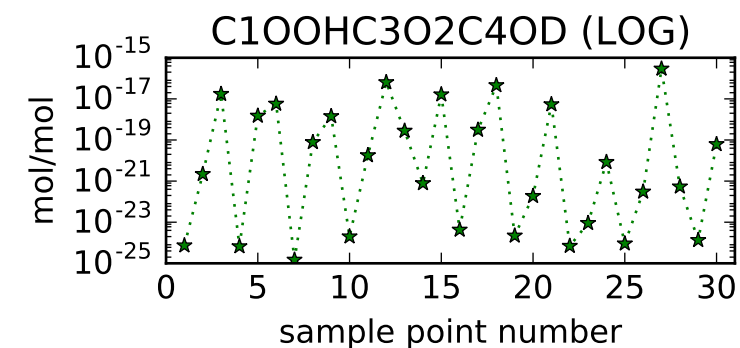



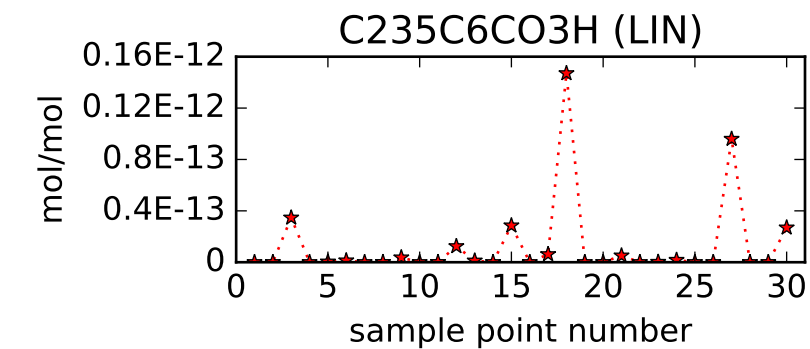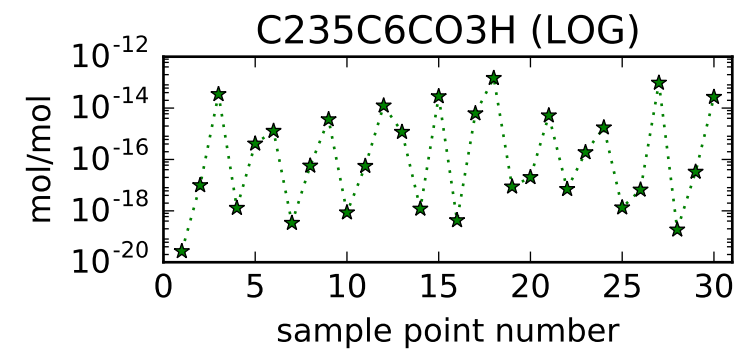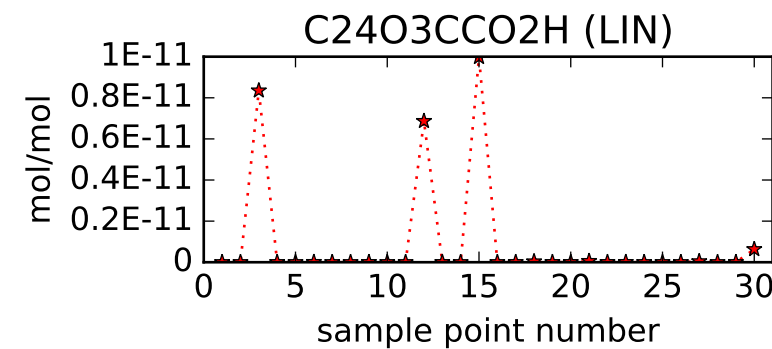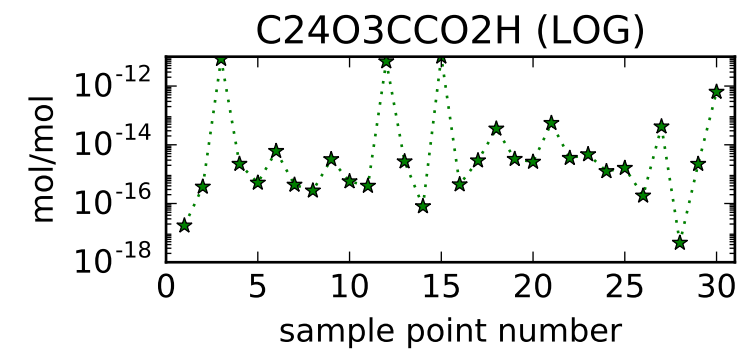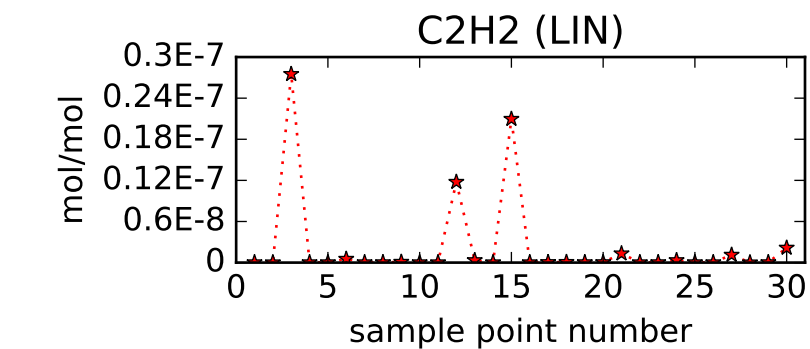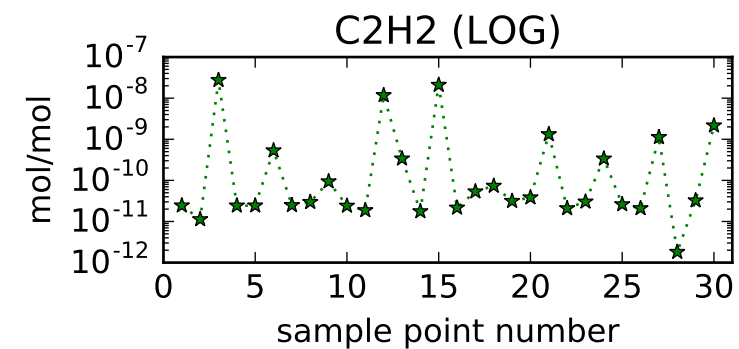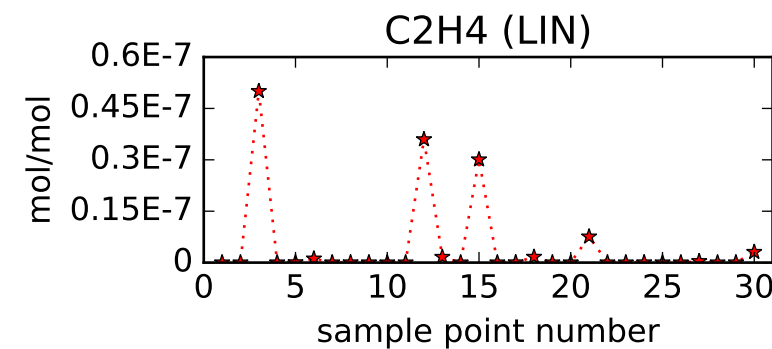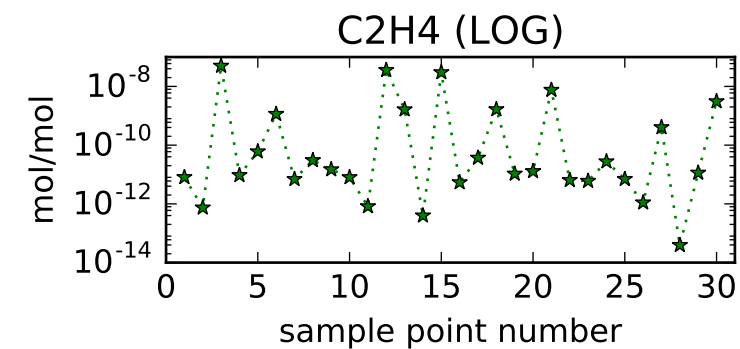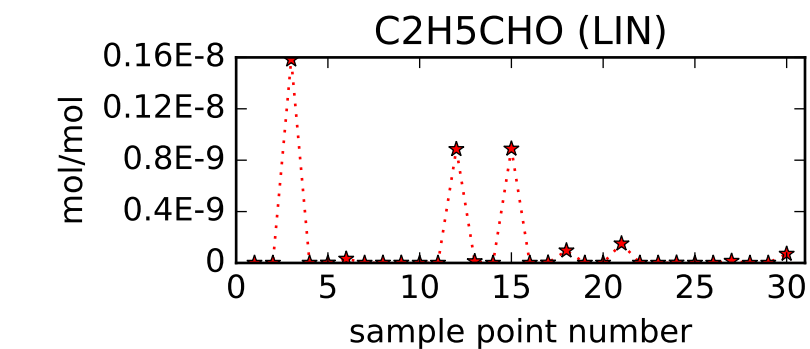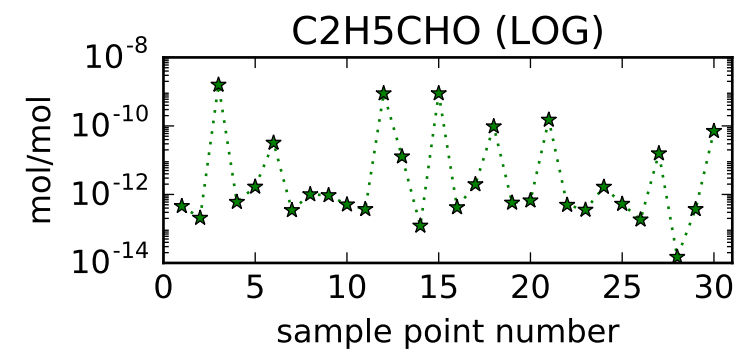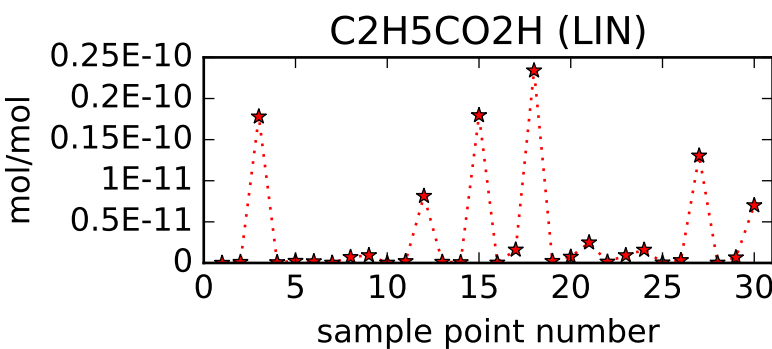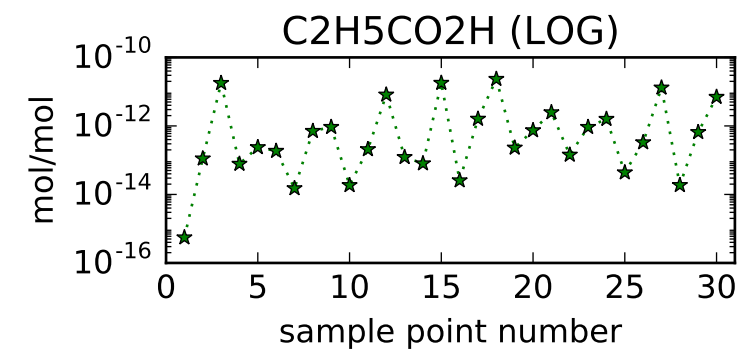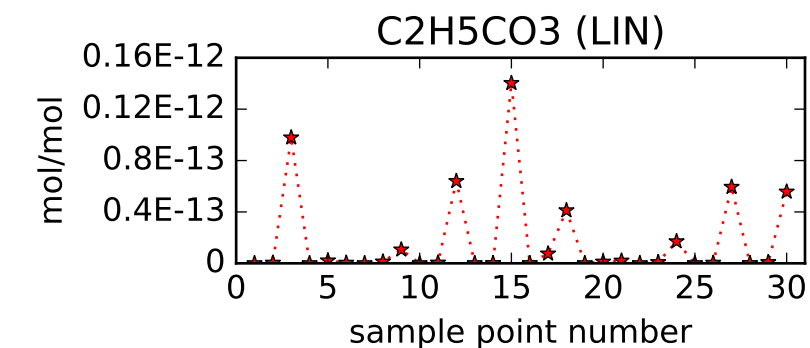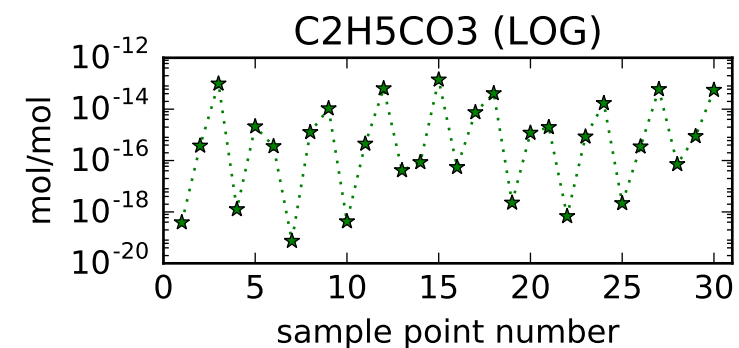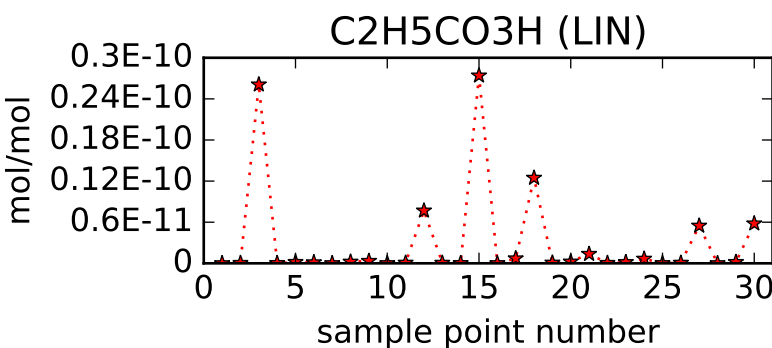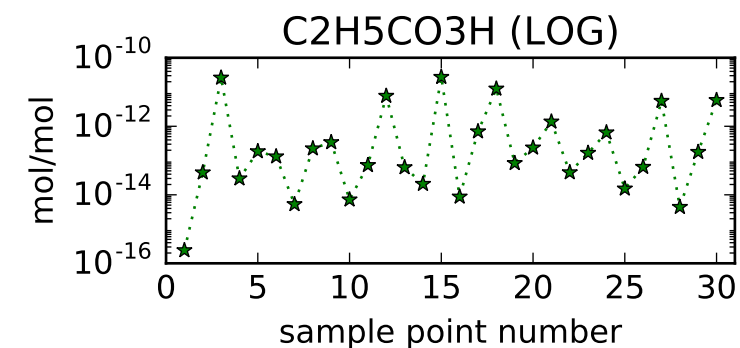

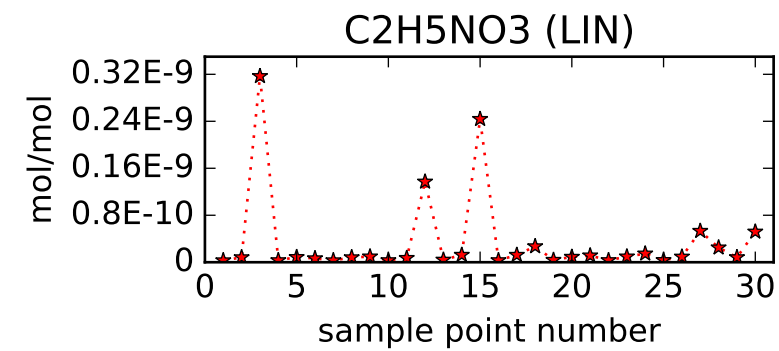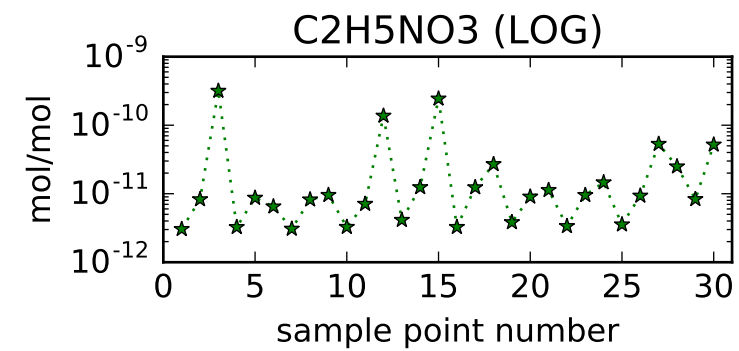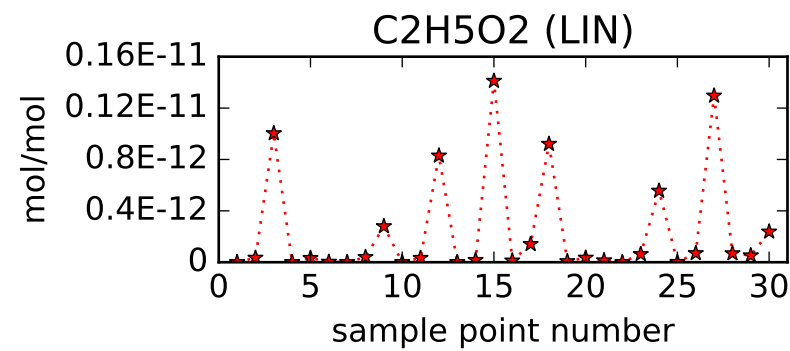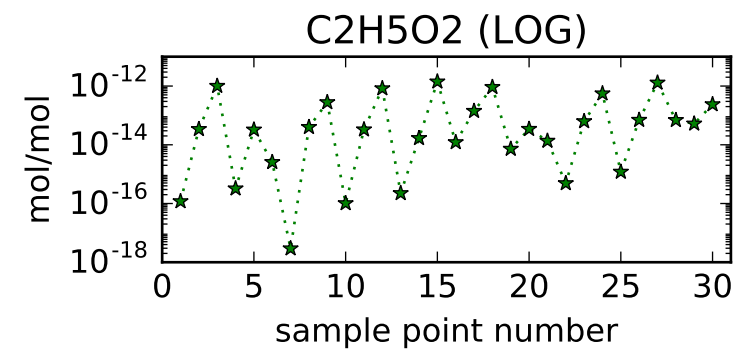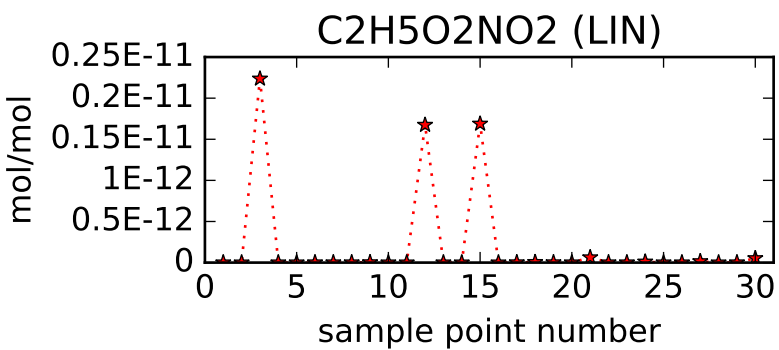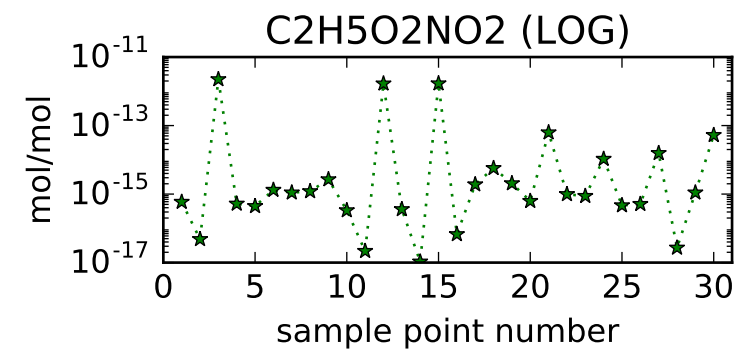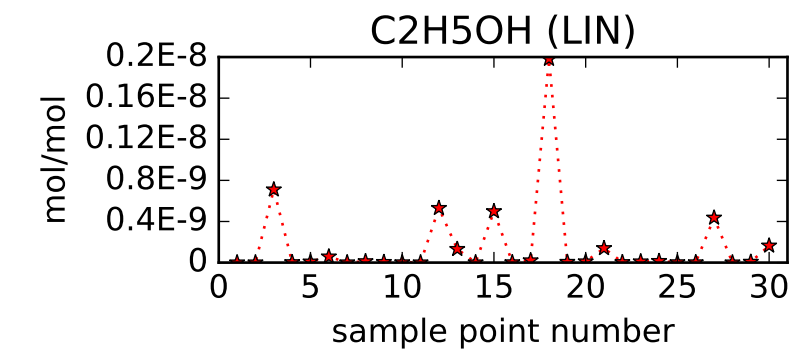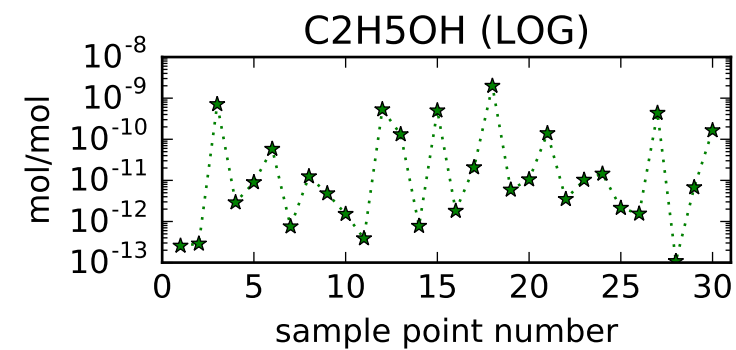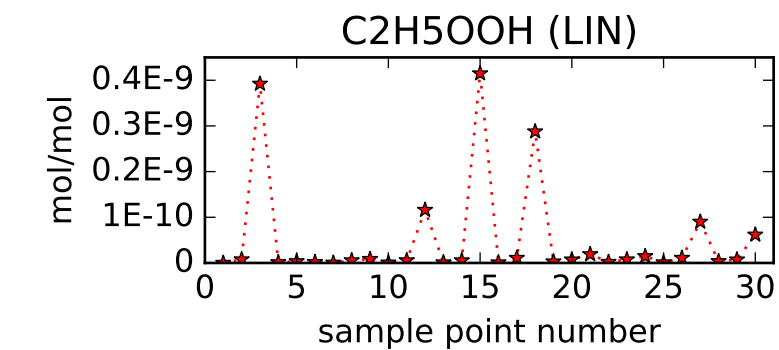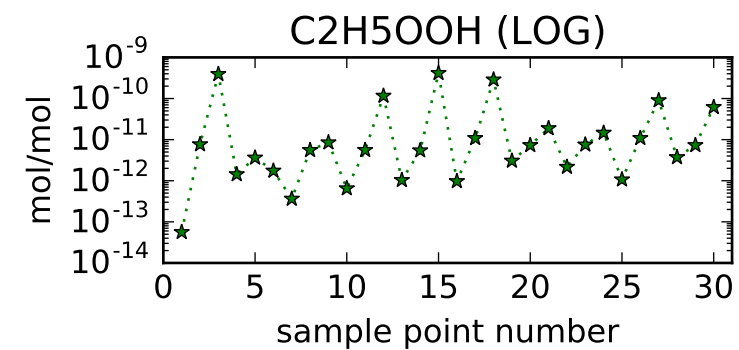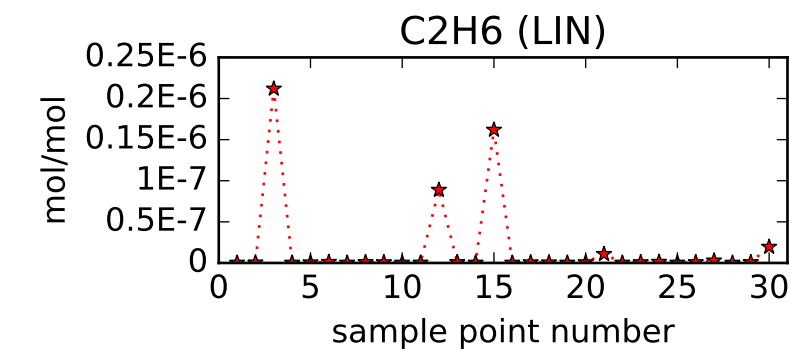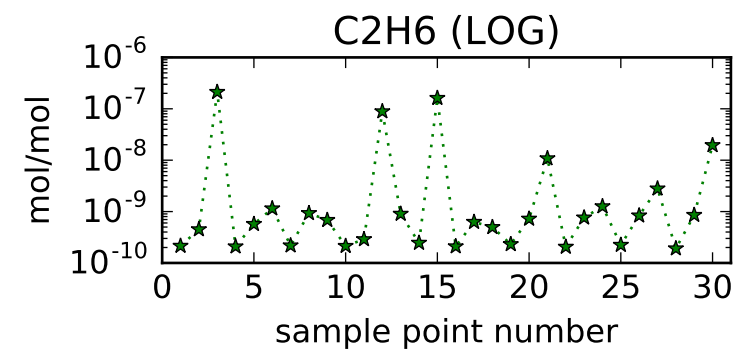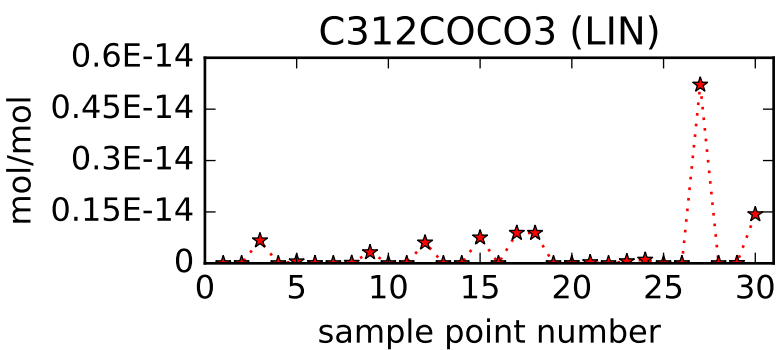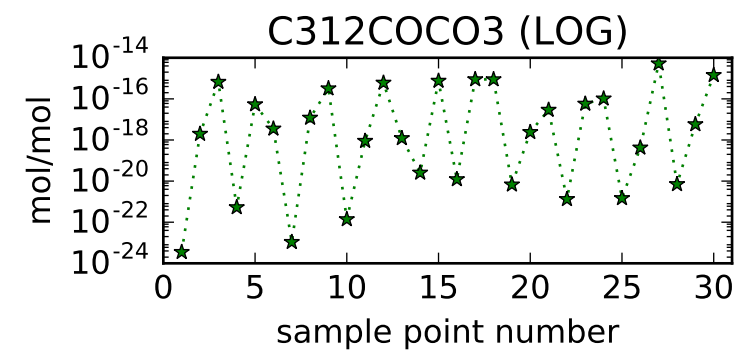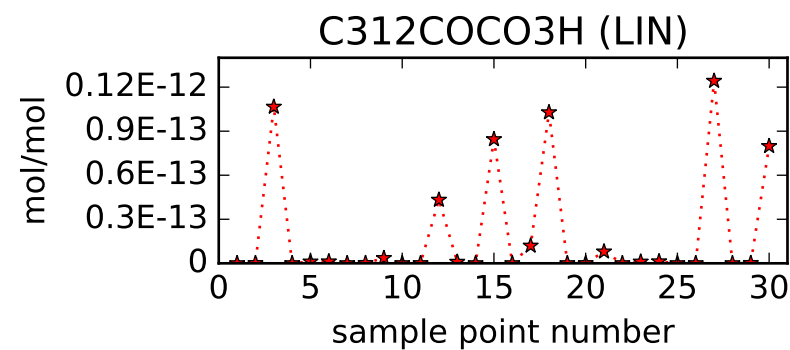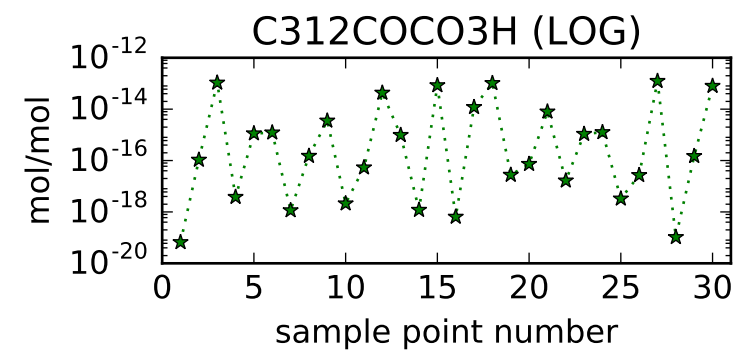

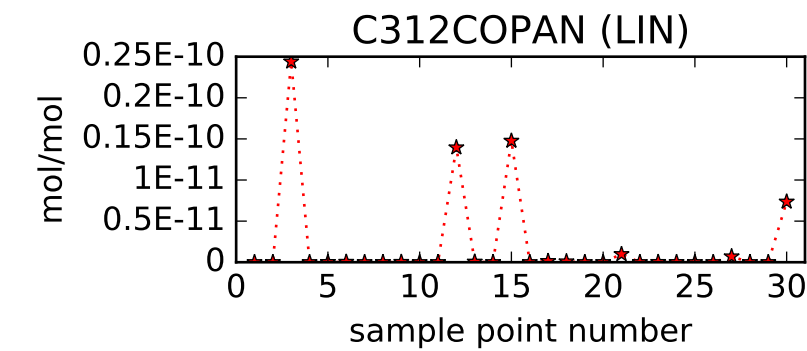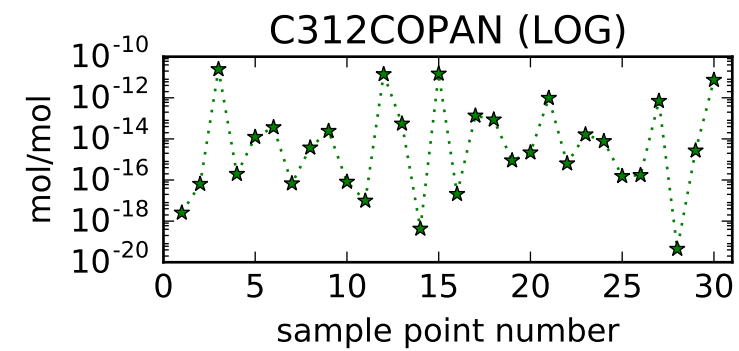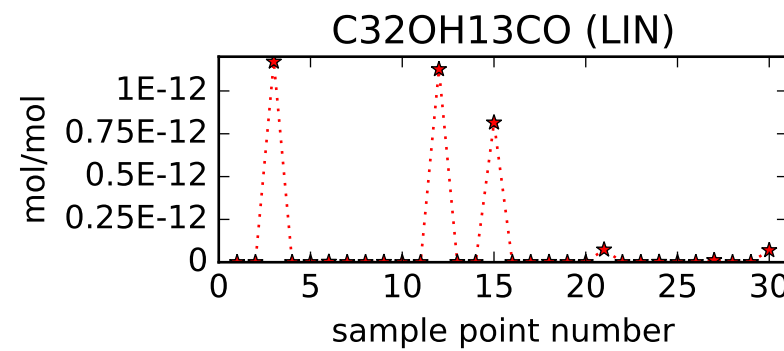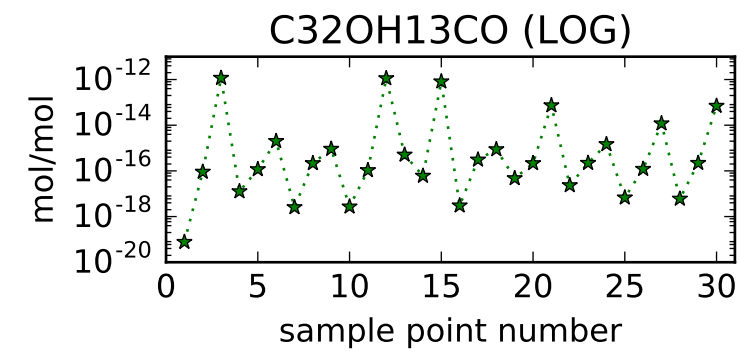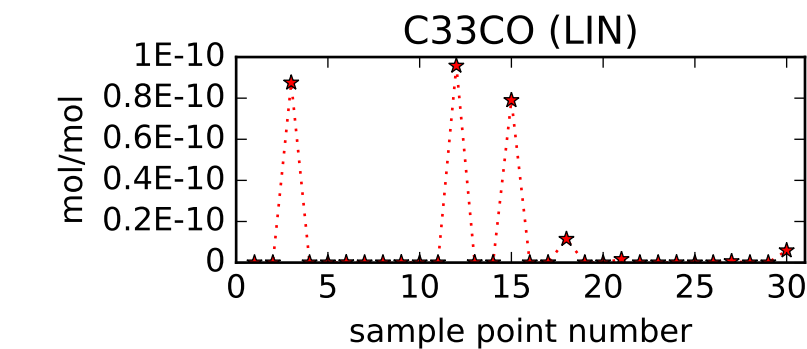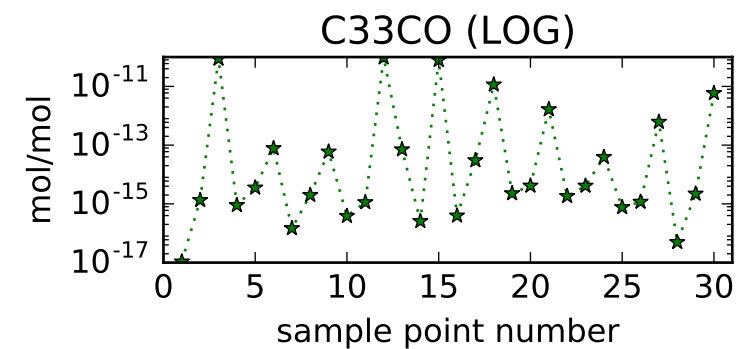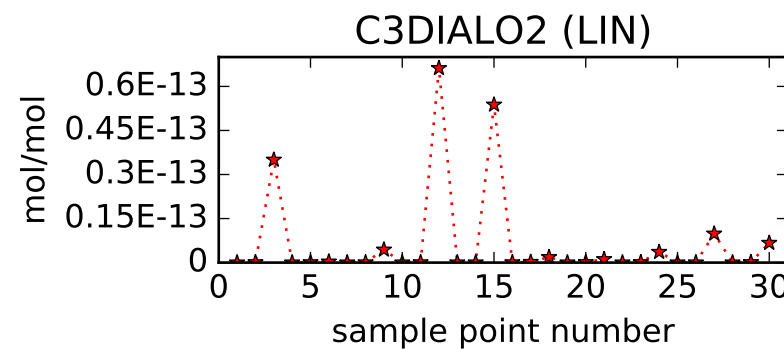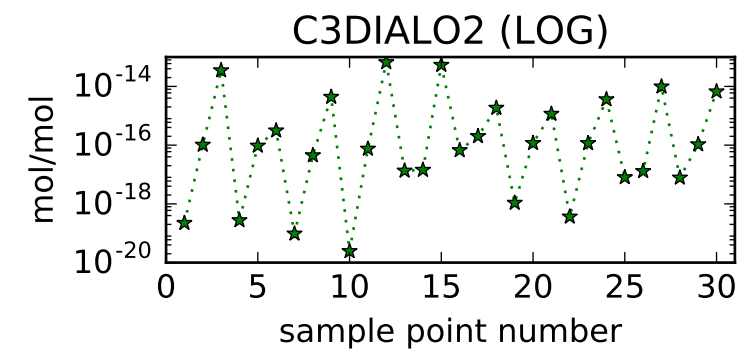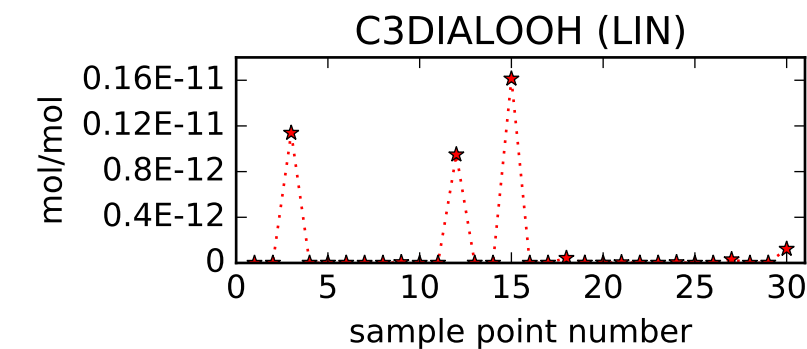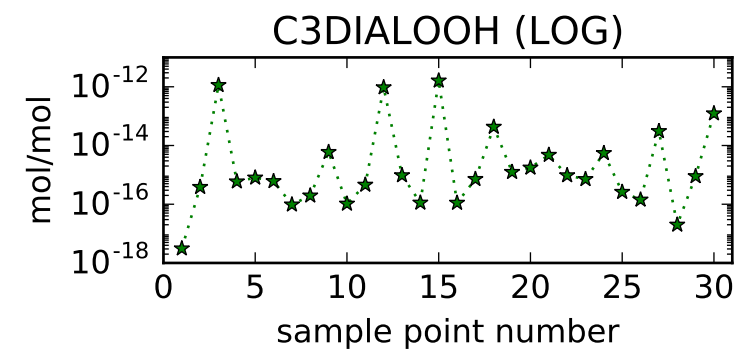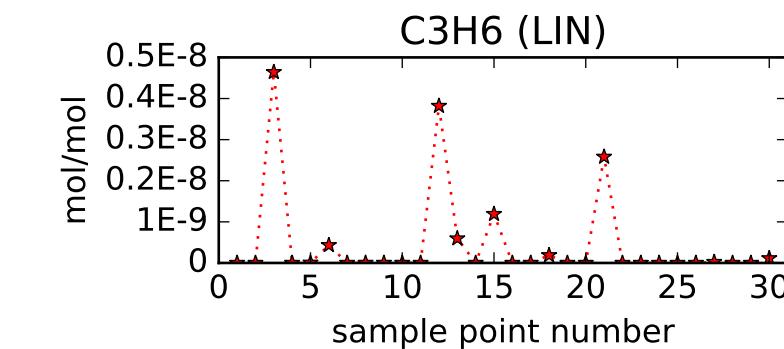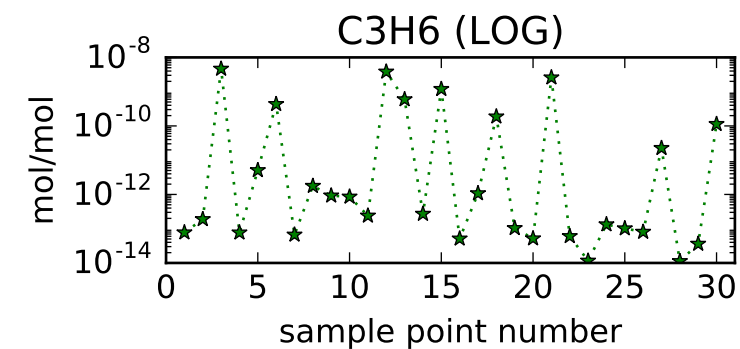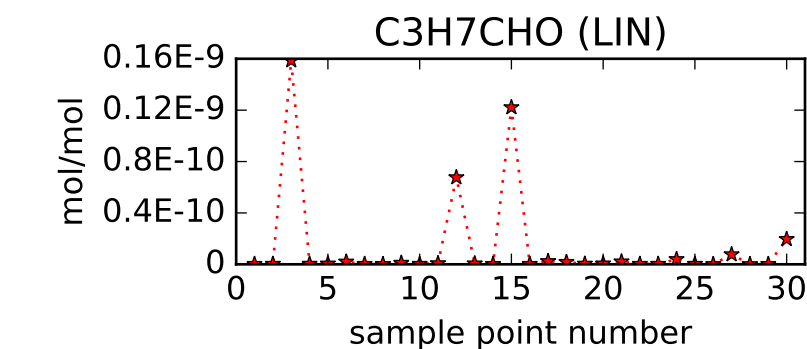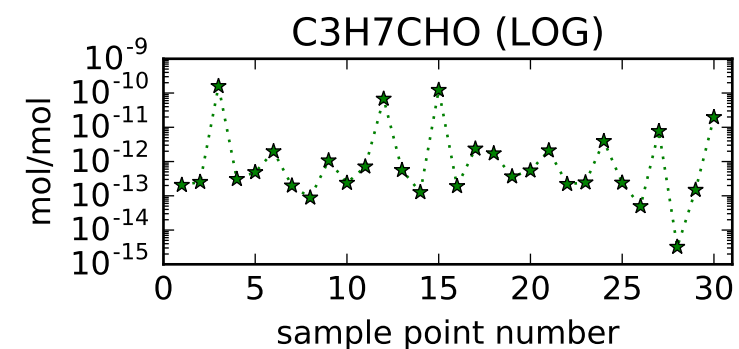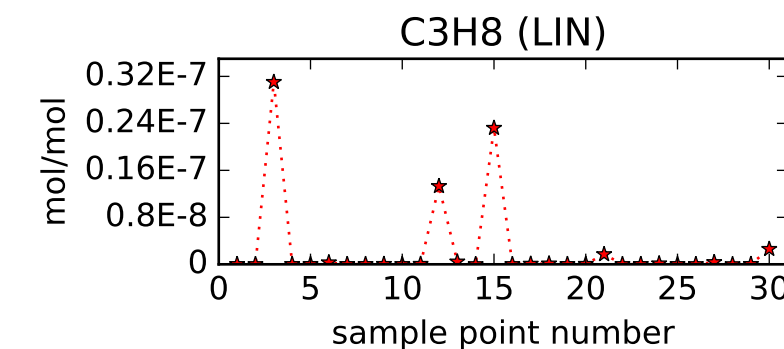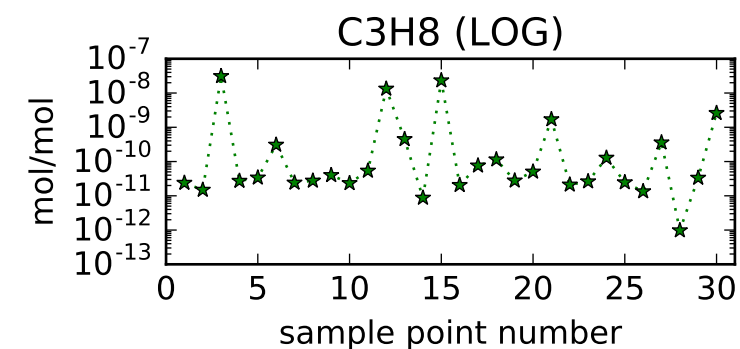

C3PAN1 (LIN)

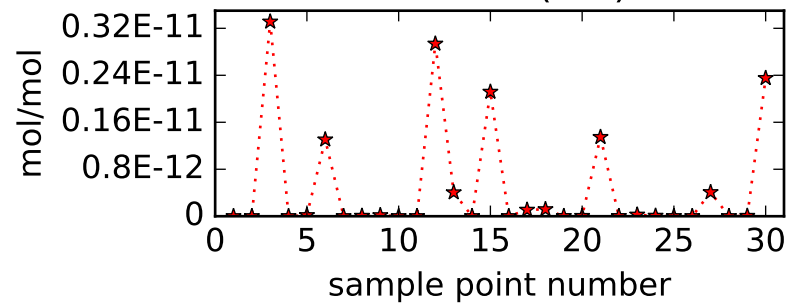

C3PAN1 (LOG)

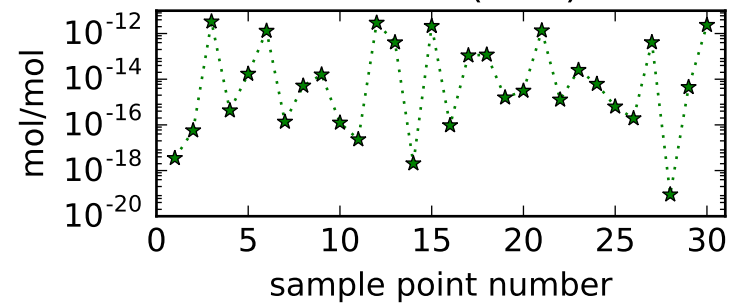

C3PAN2 (LIN)

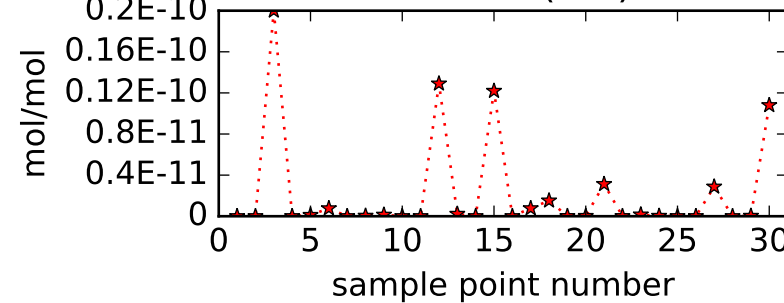

C3PAN2 (LOG)

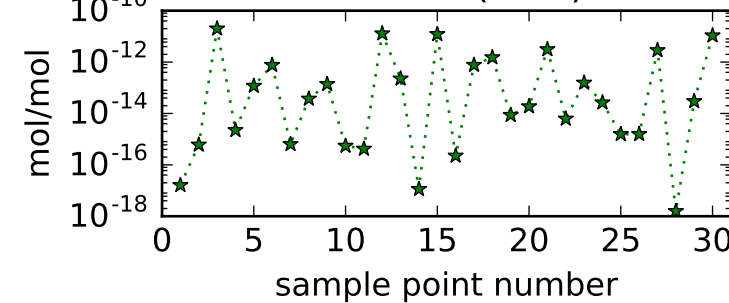

C413COOOH (LIN)

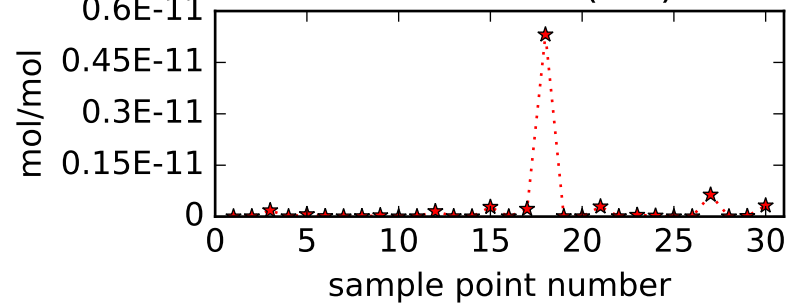

C413COOOH (LOG)

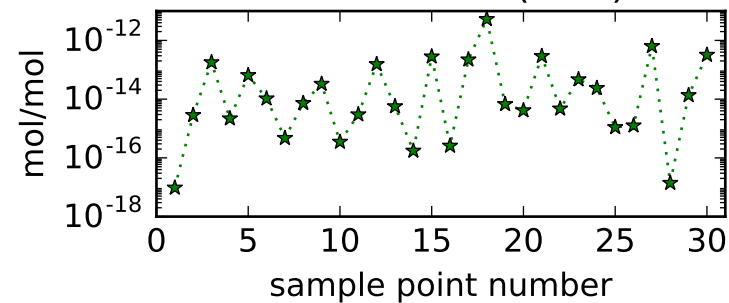

C44O2 (LIN)

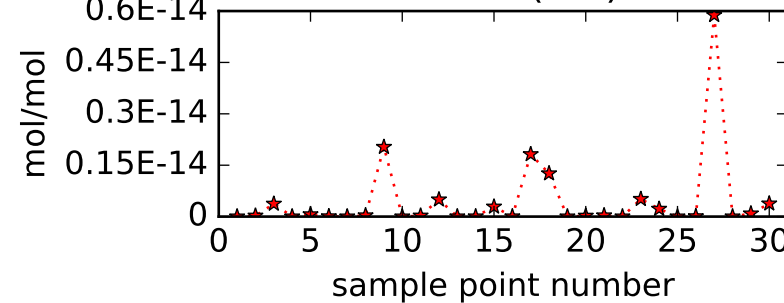

C44O2 (LOG)

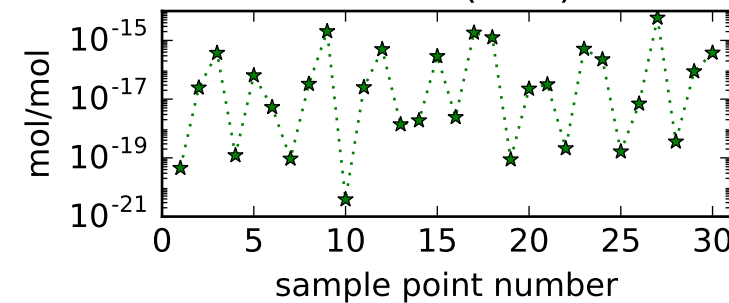

C44OOH (LIN)

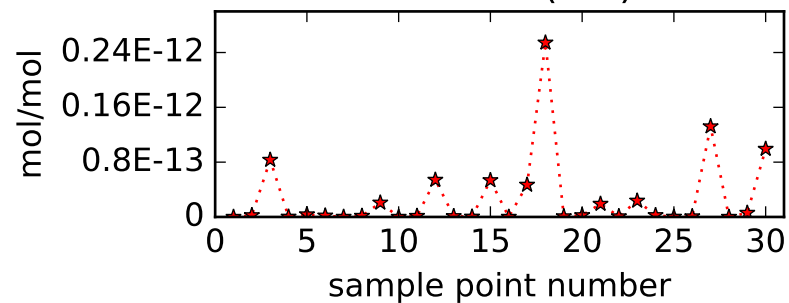

C44OOH (LOG)

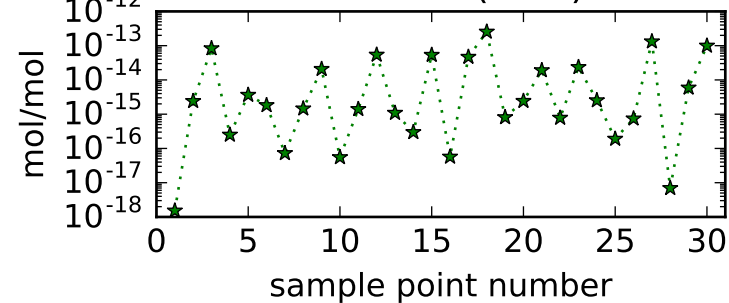

C4CO2DBCO3 (LIN)

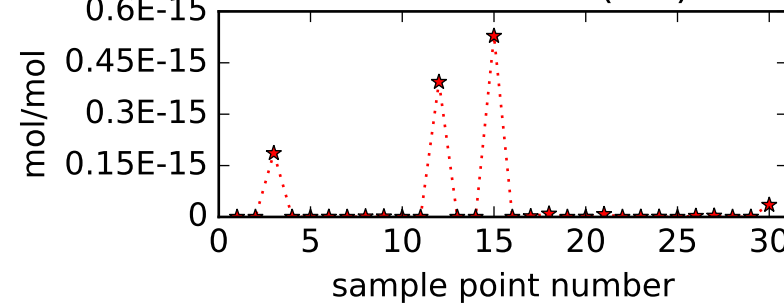

C4CO2DBCO3 (LOG)

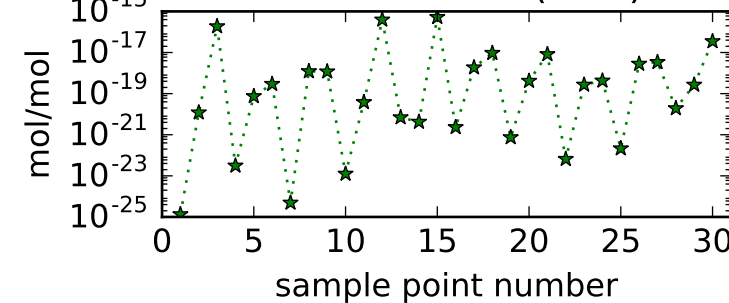

C4CO2DBPAN (LIN)

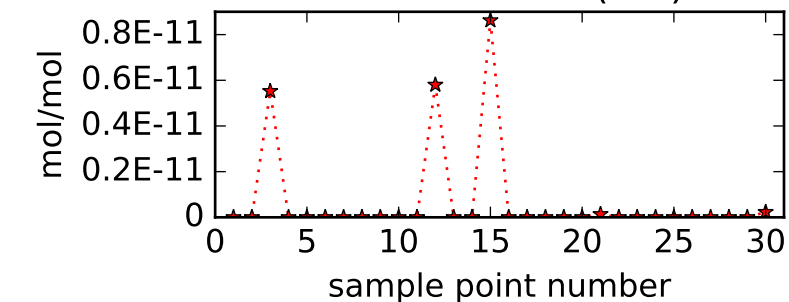

C4CO2DBPAN (LOG)

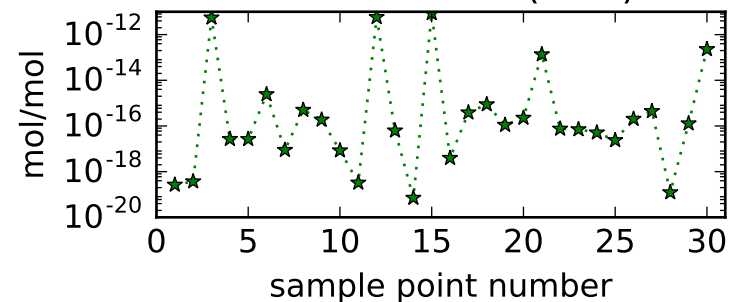

C4CO2DCO3H (LIN)

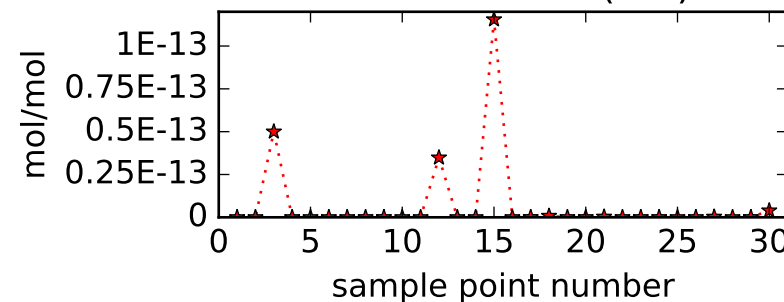

C4CO2DCO3H (LOG)

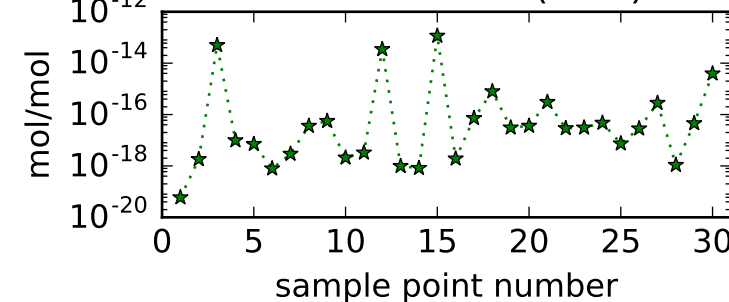

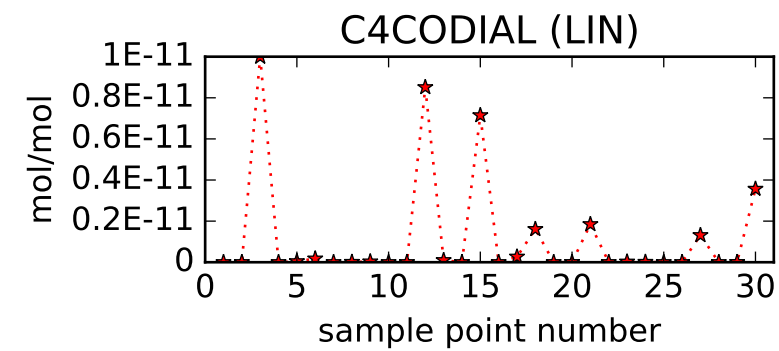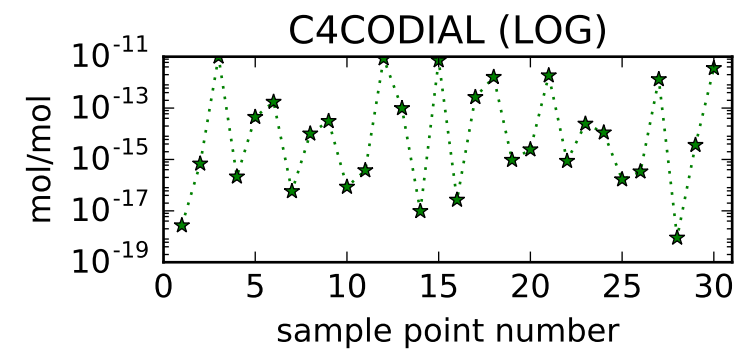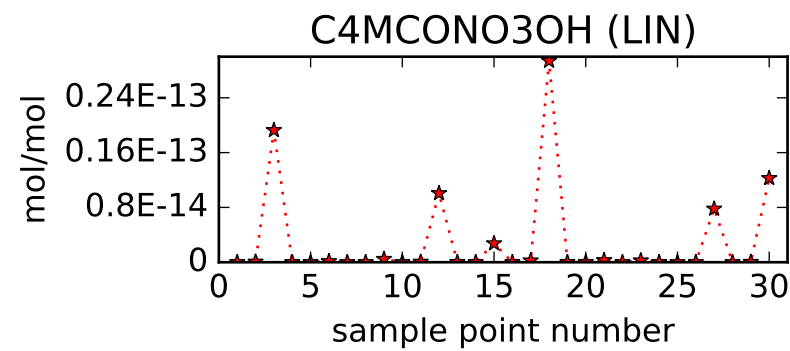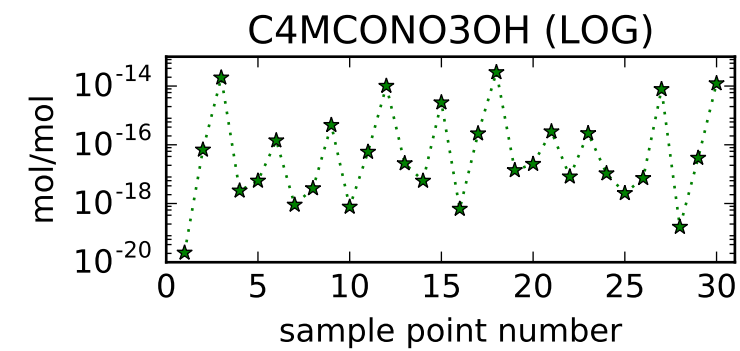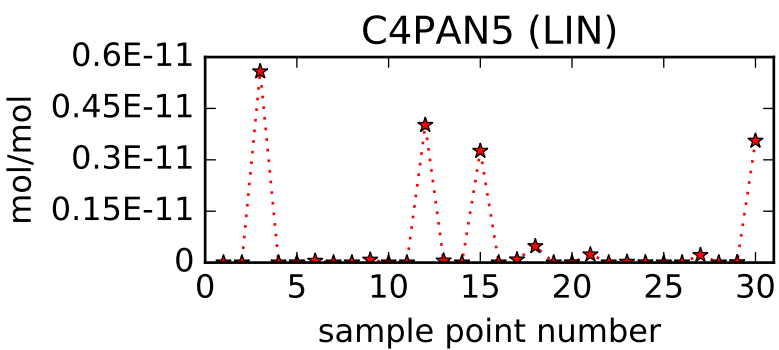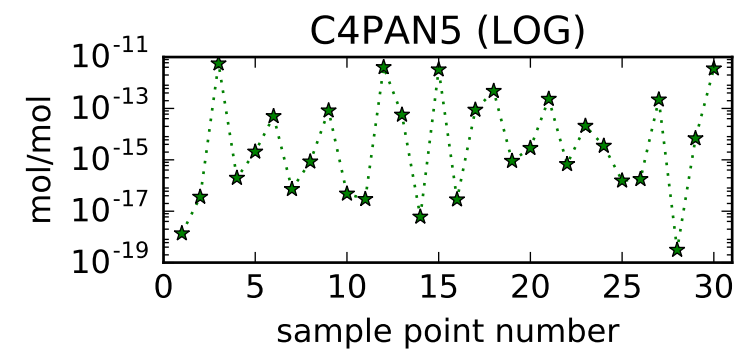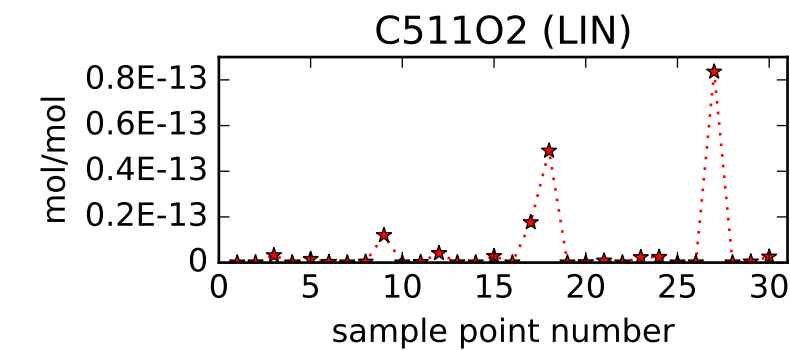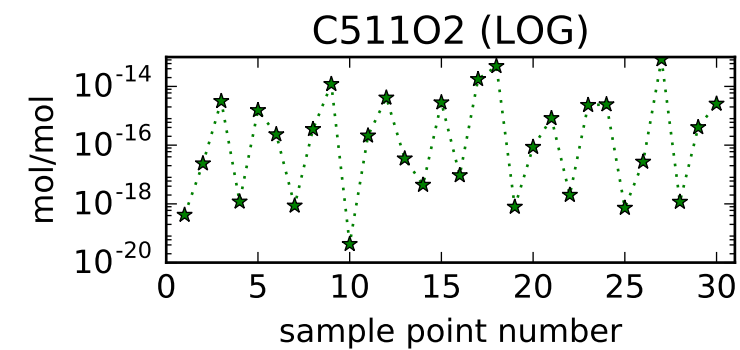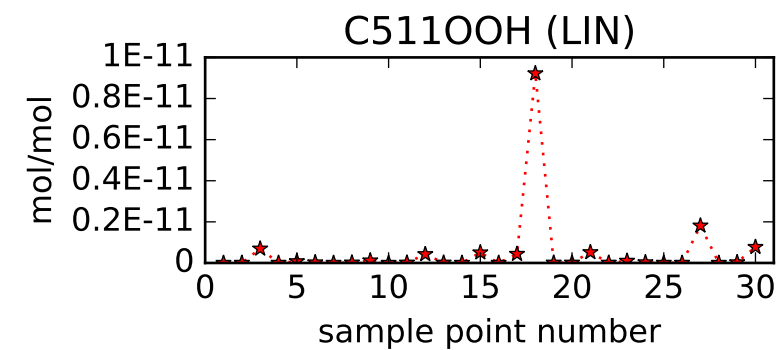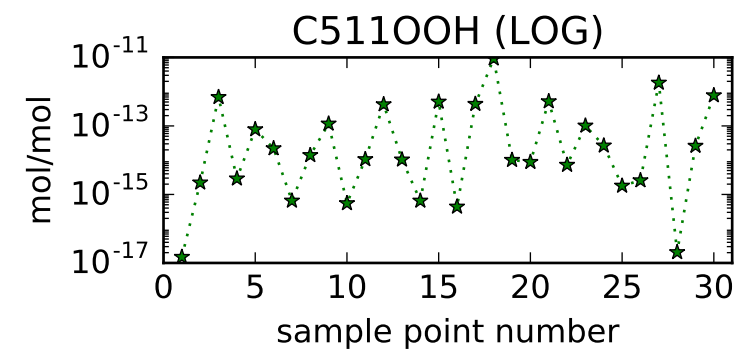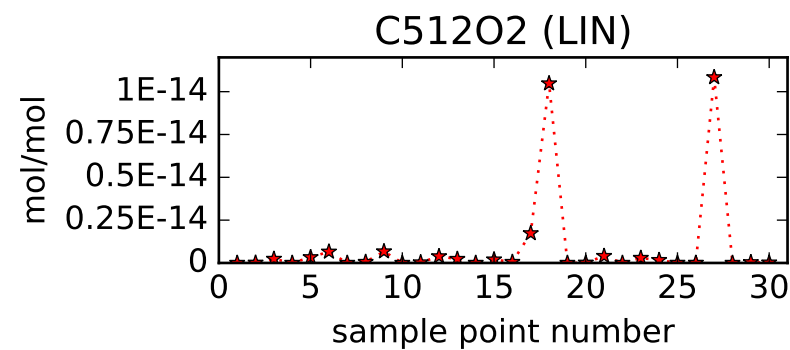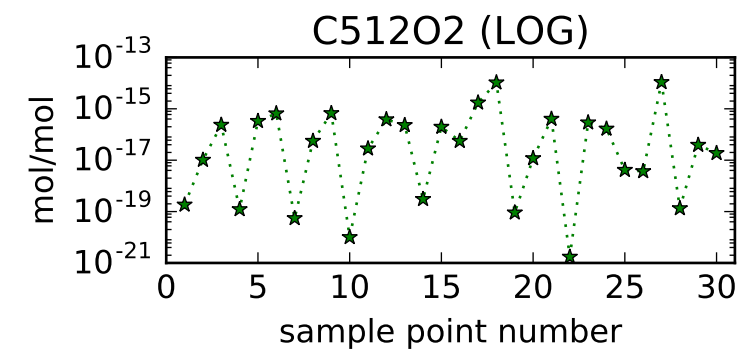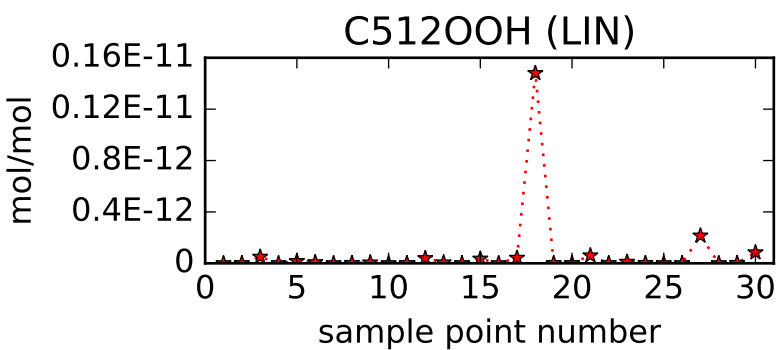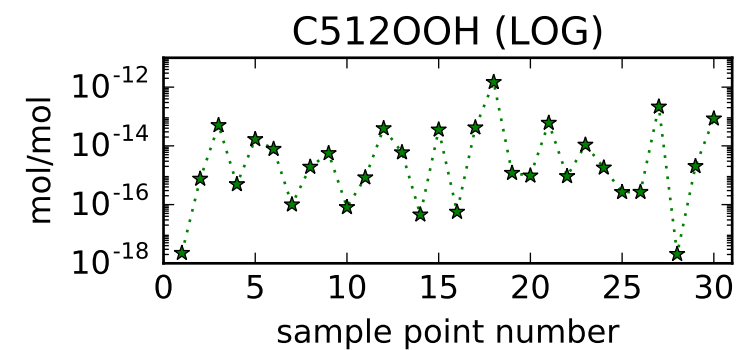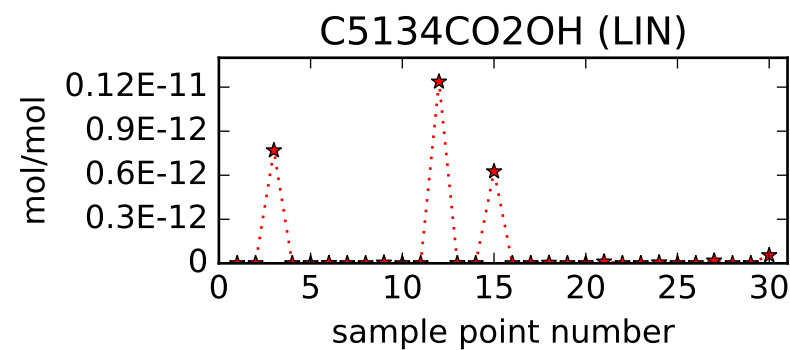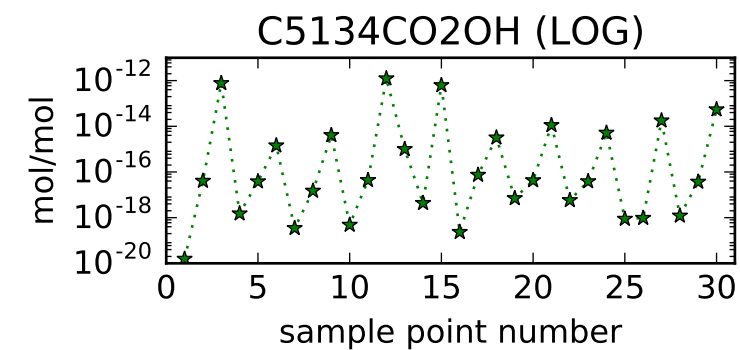



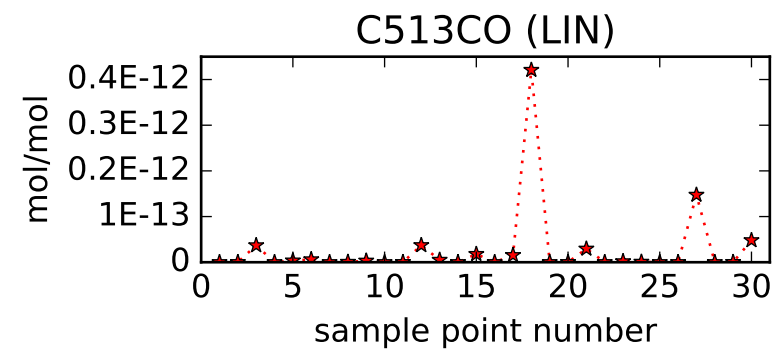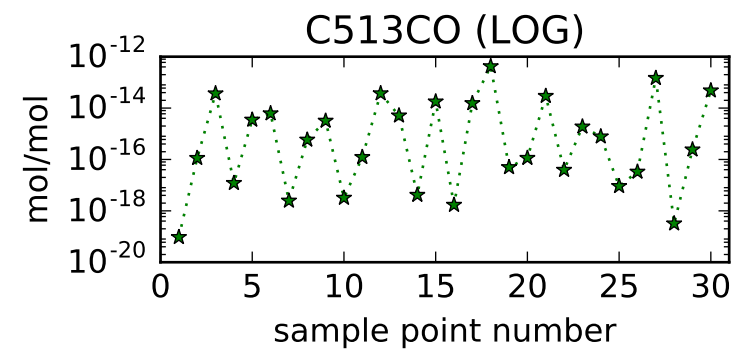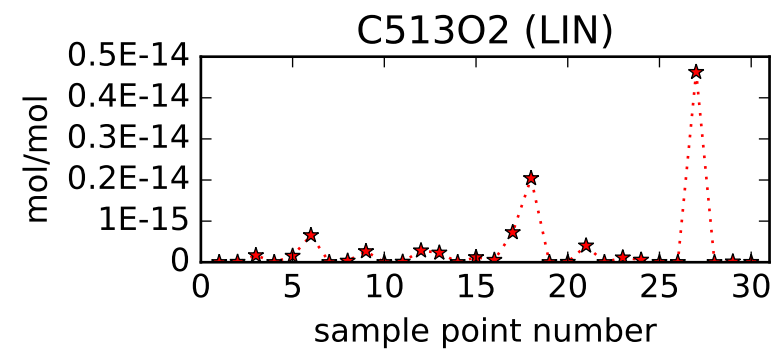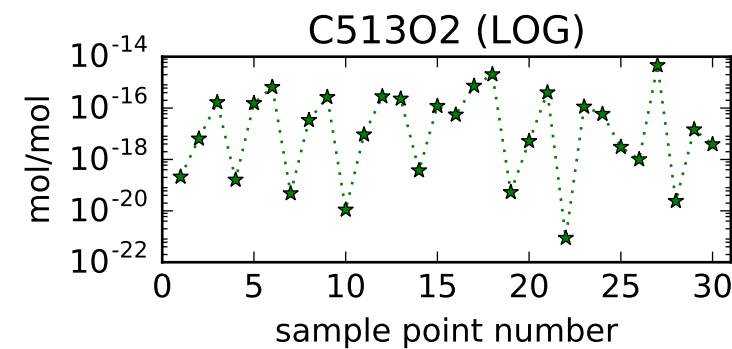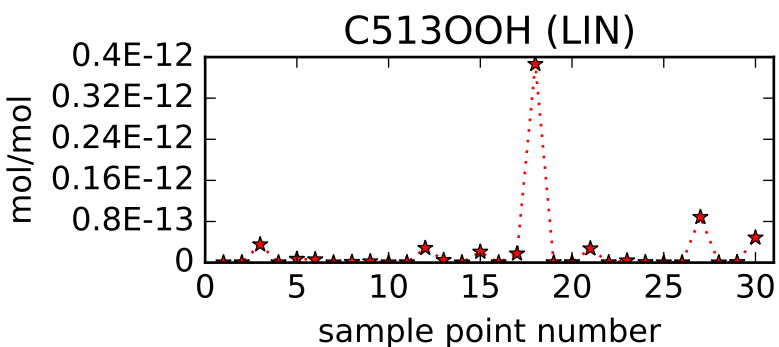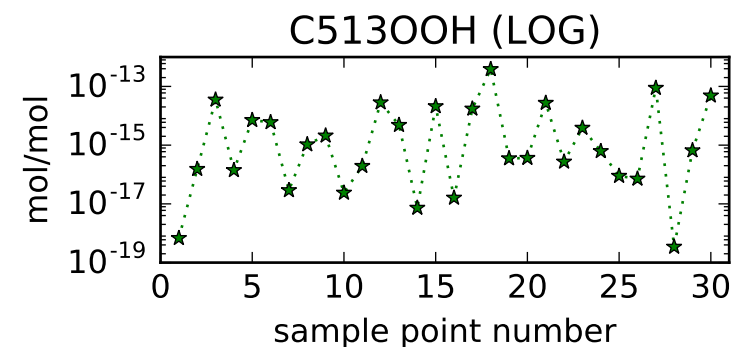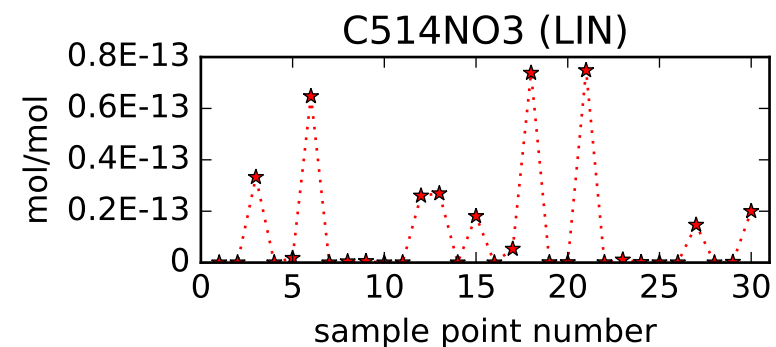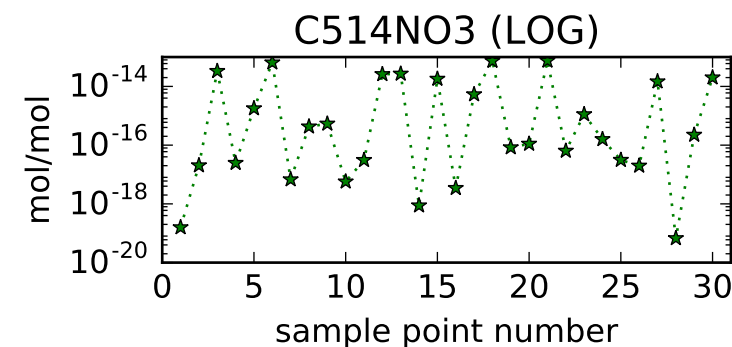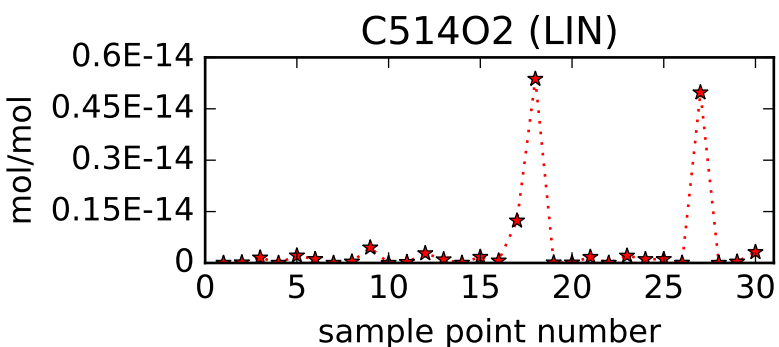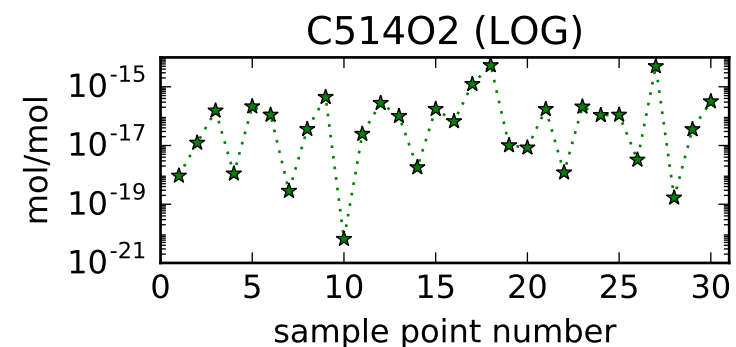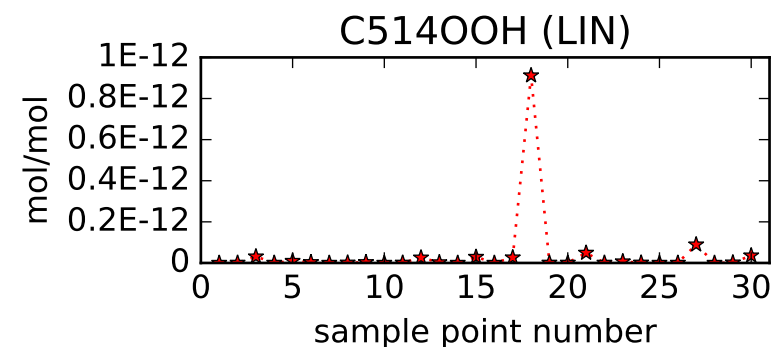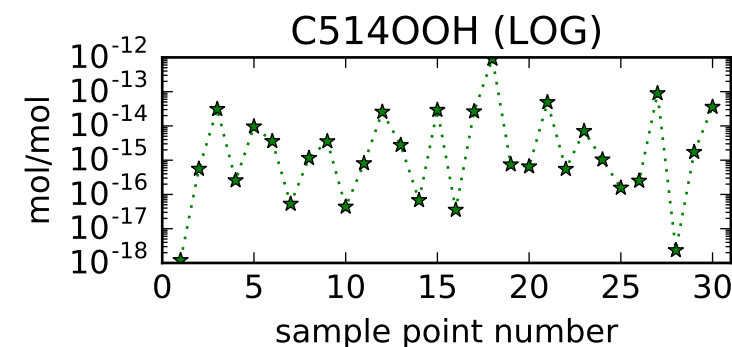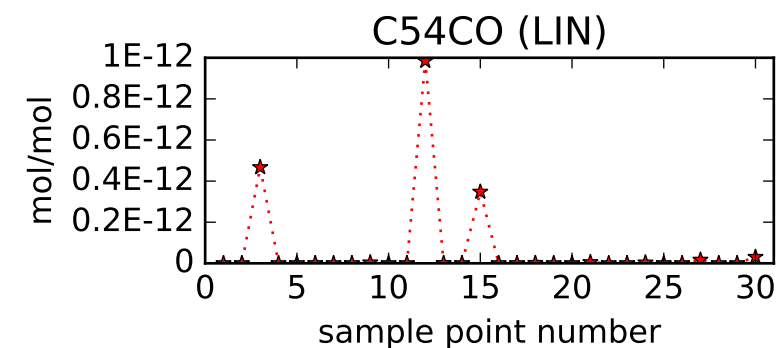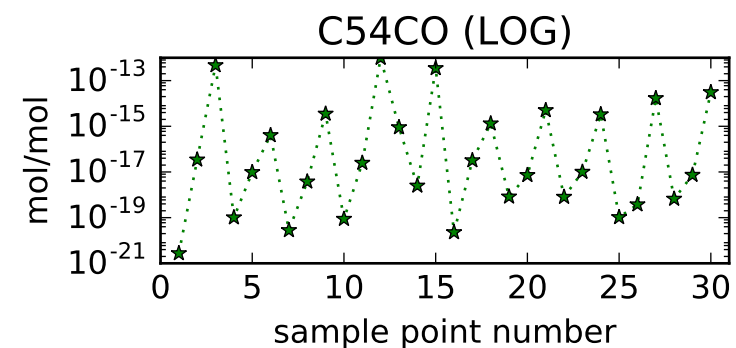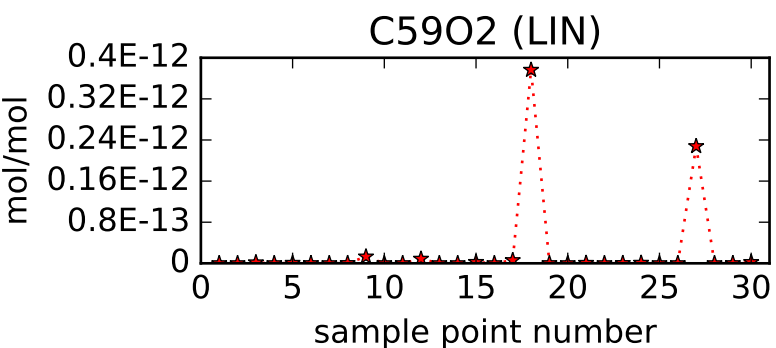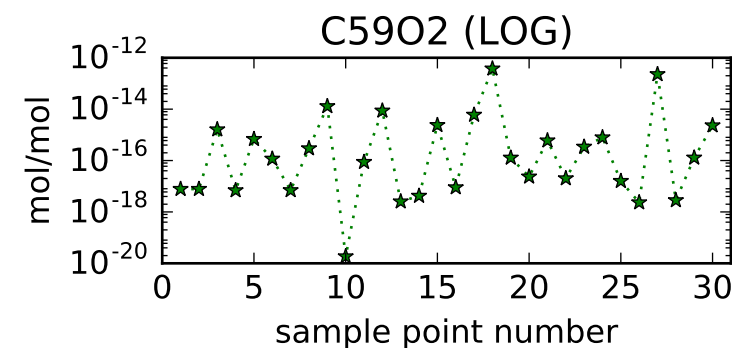

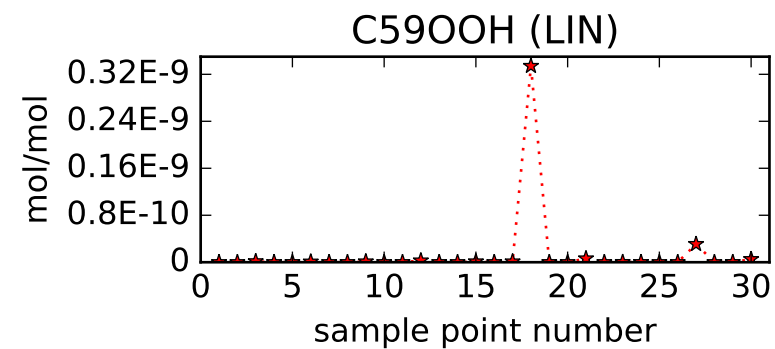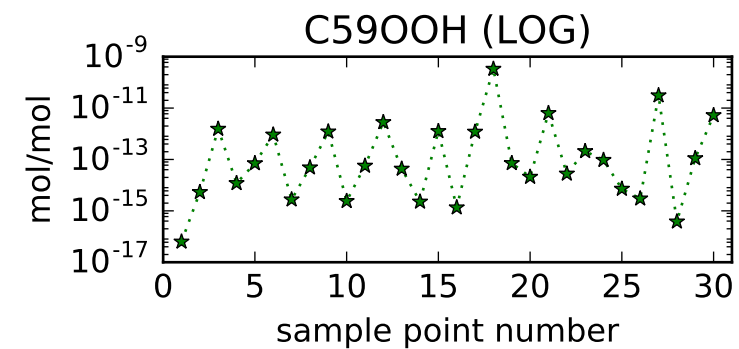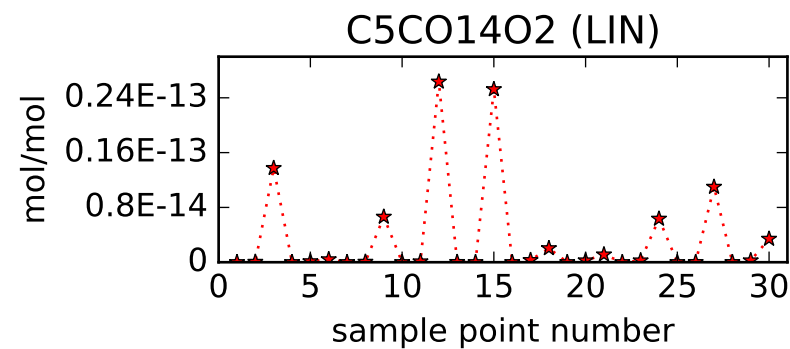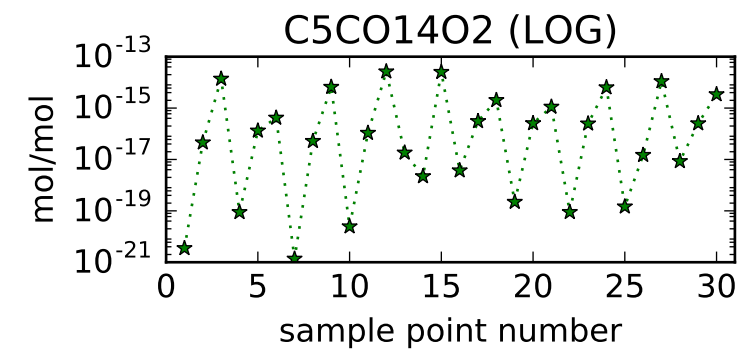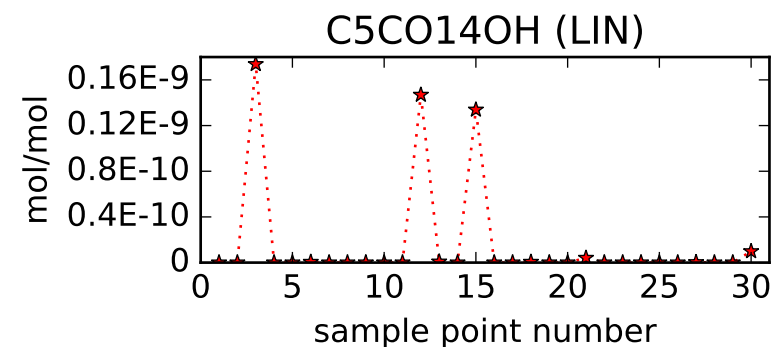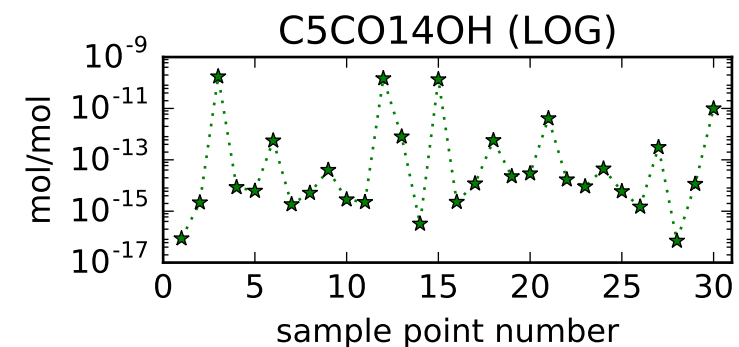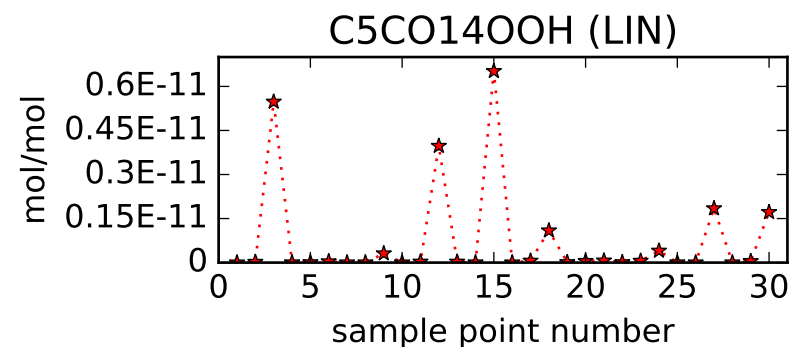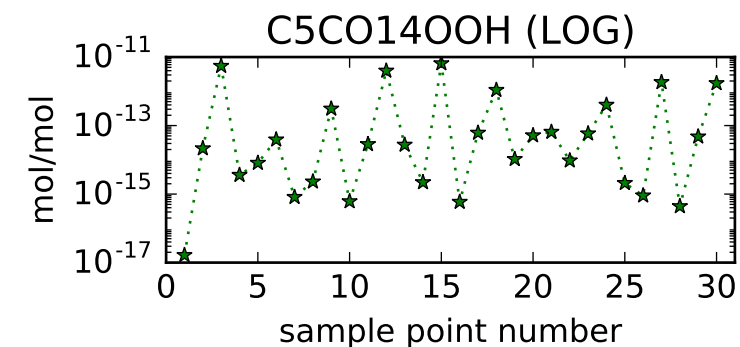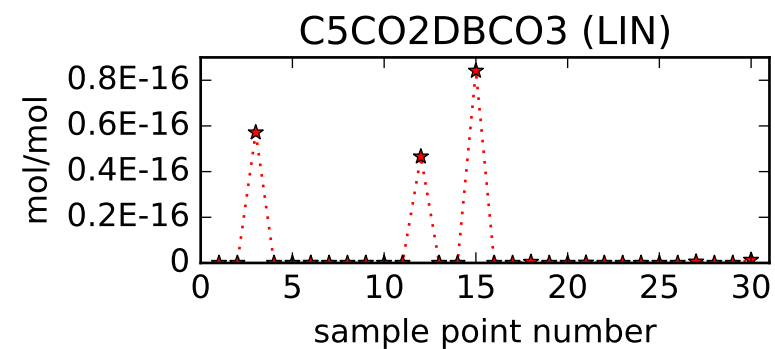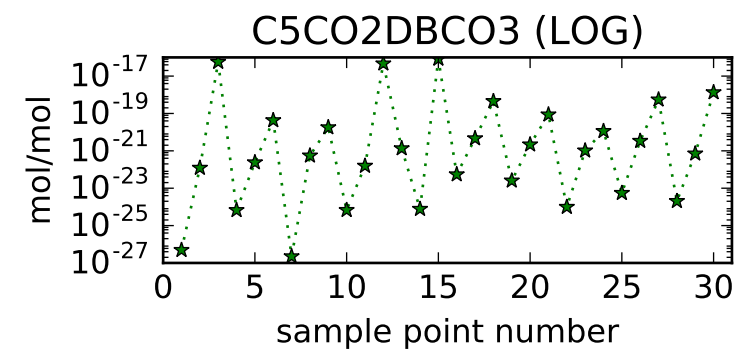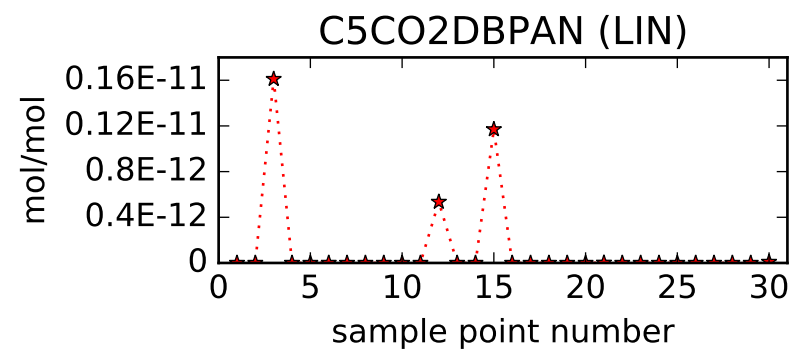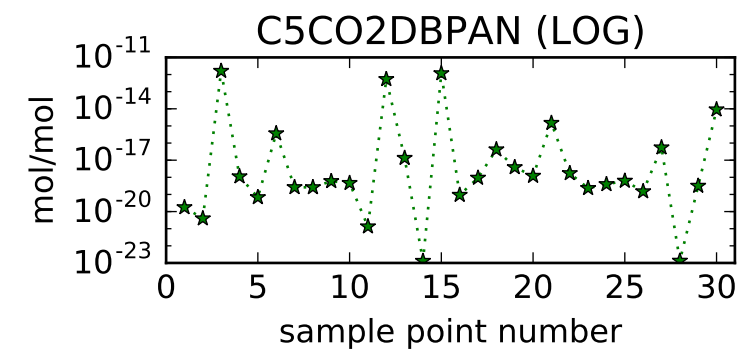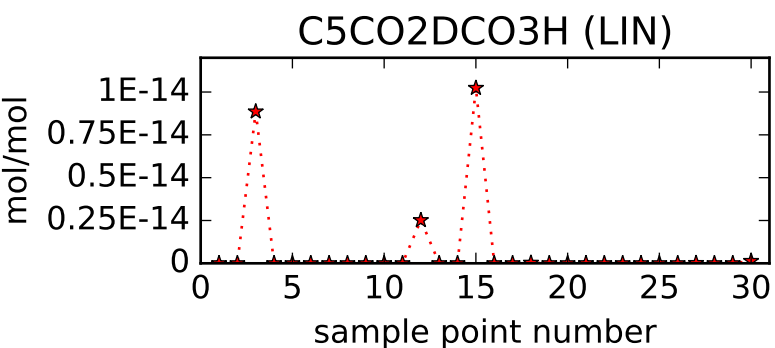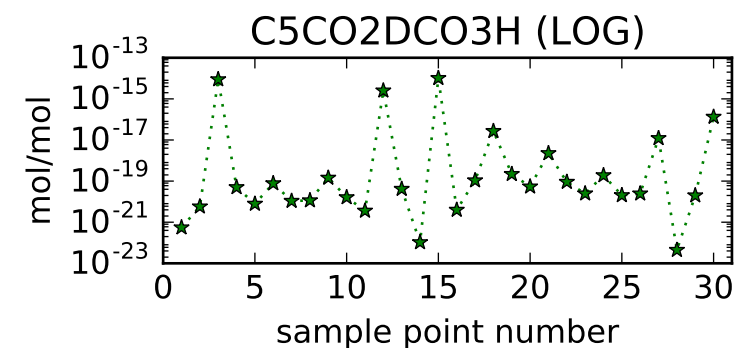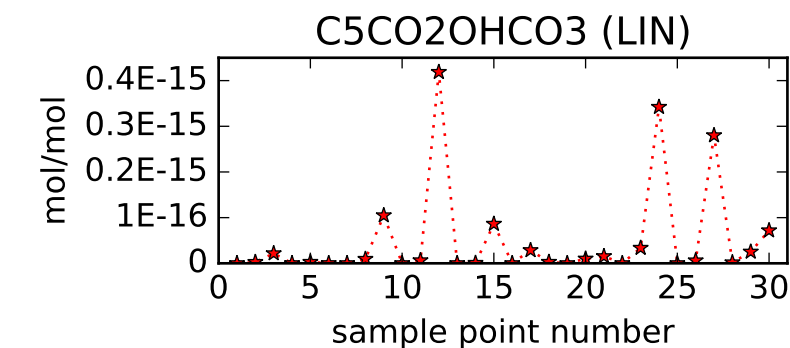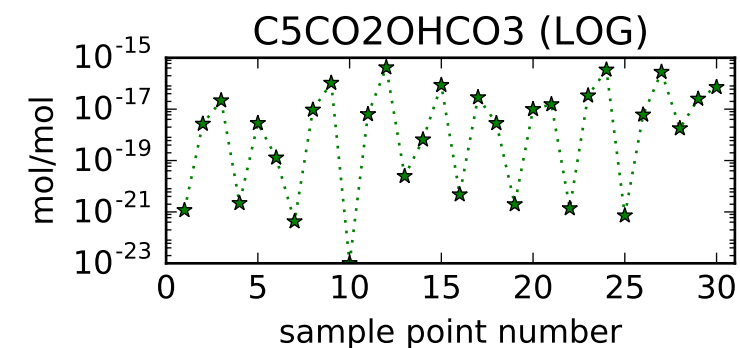

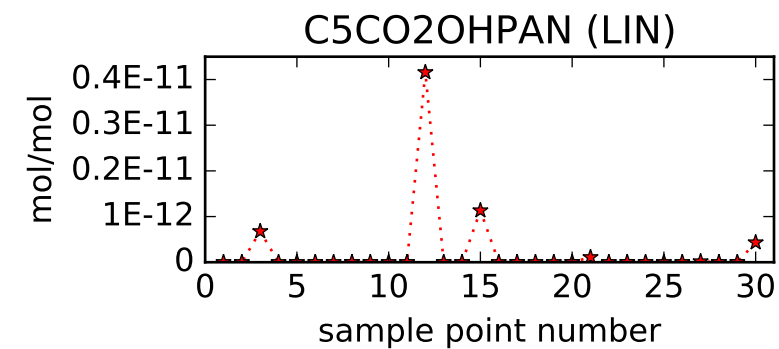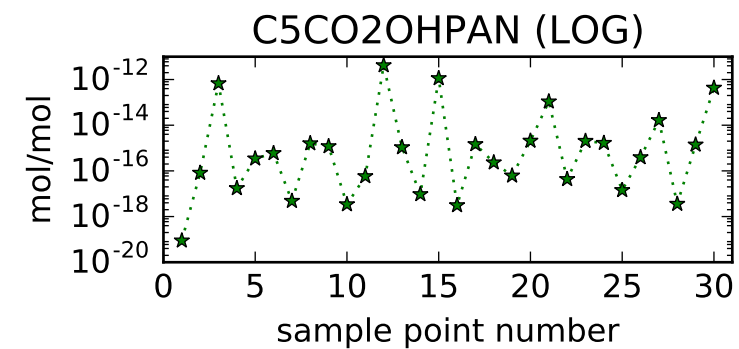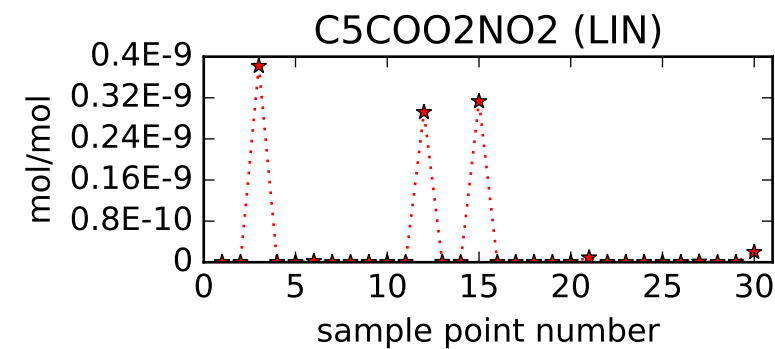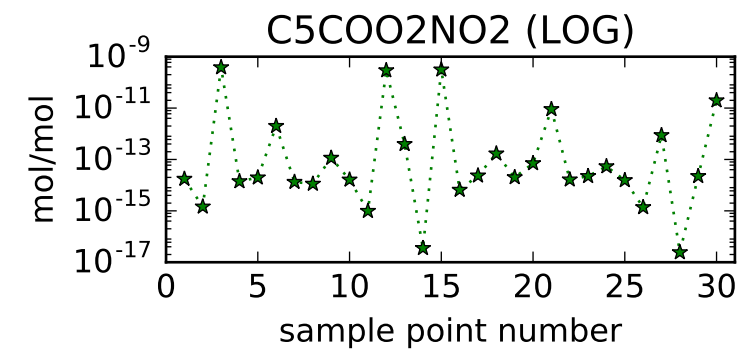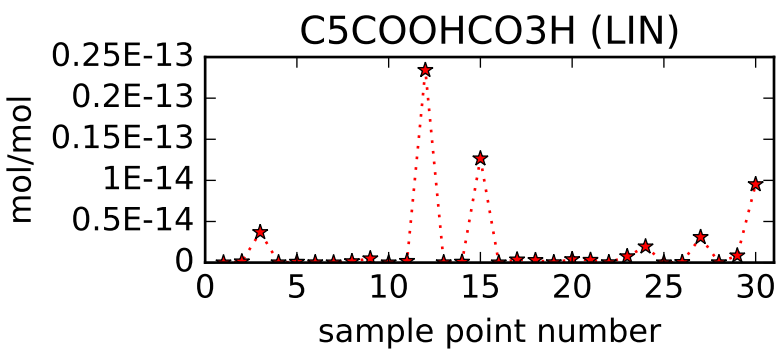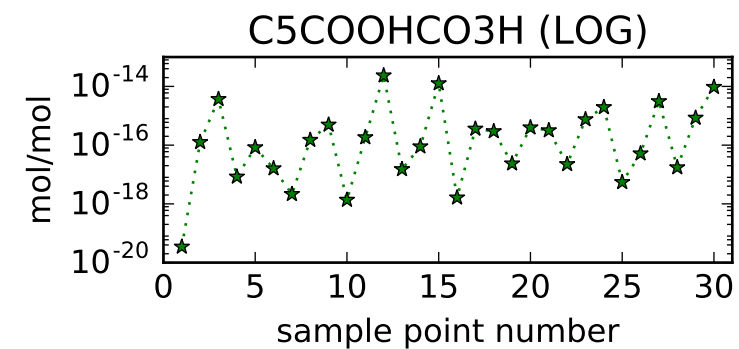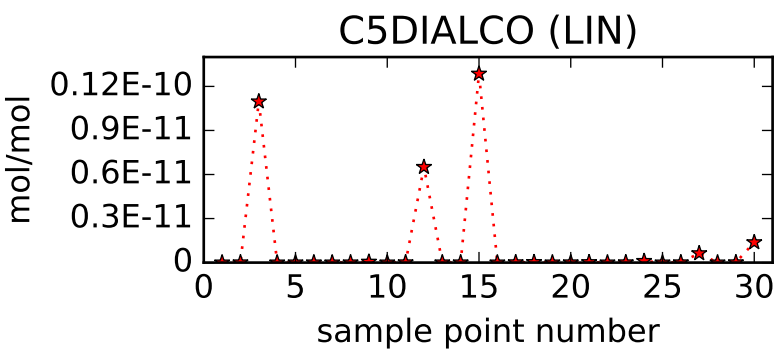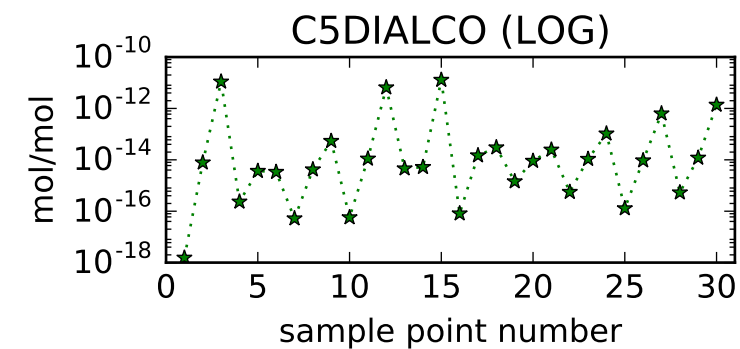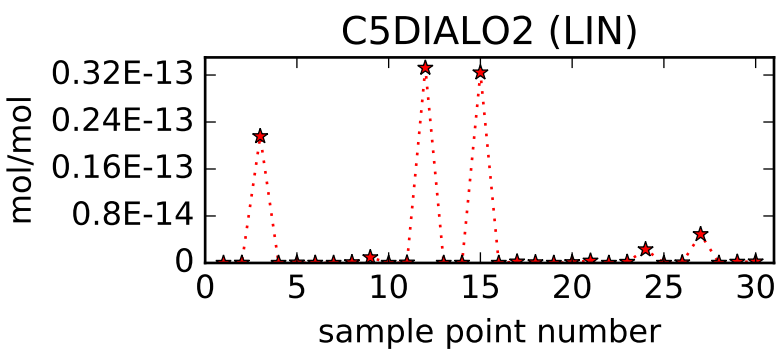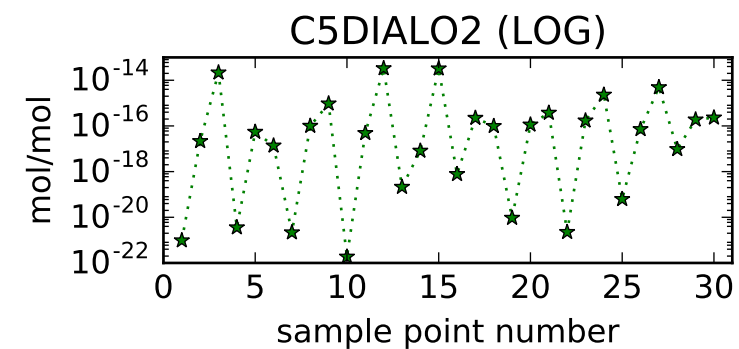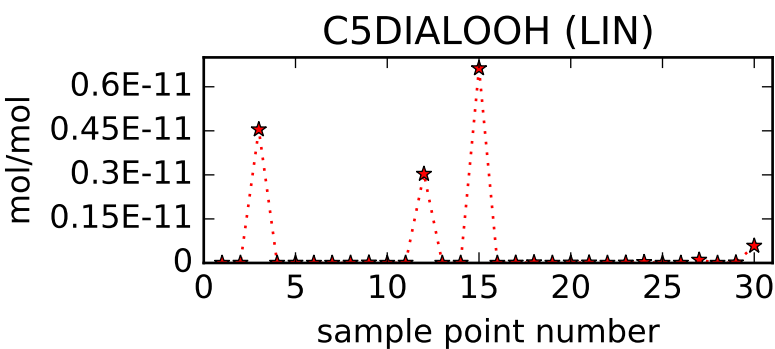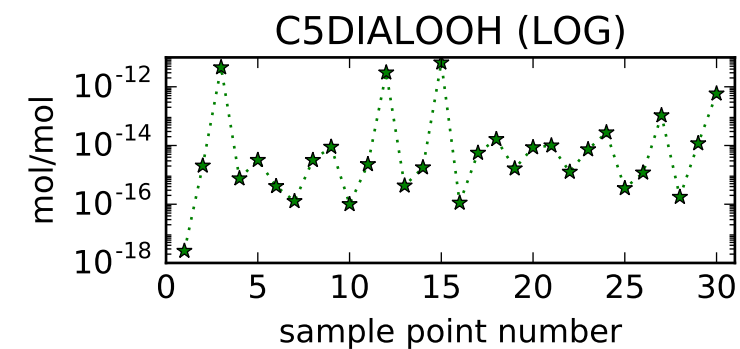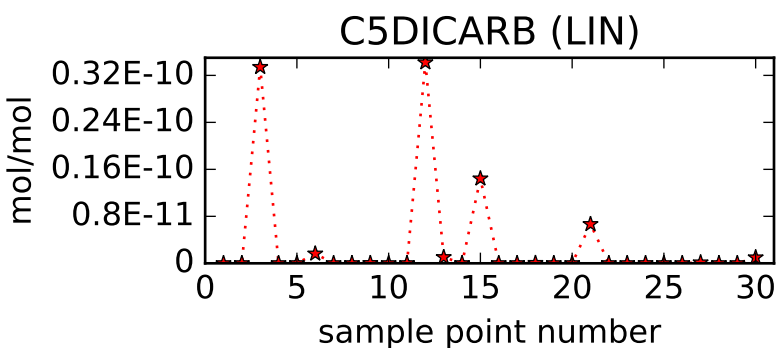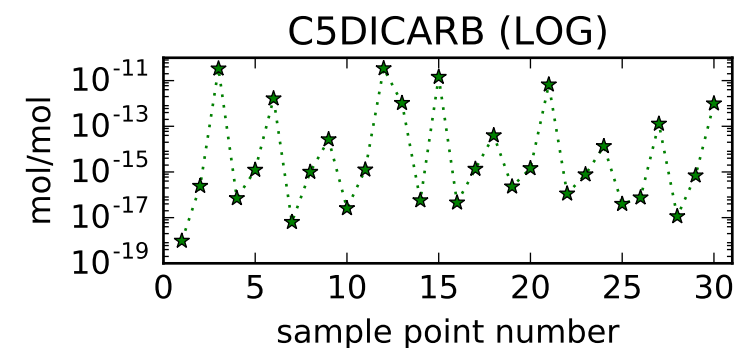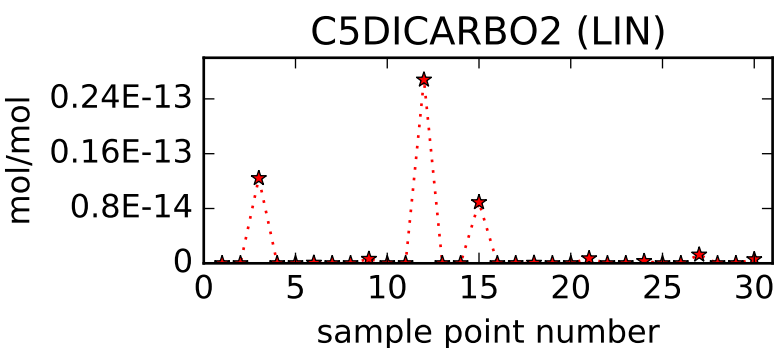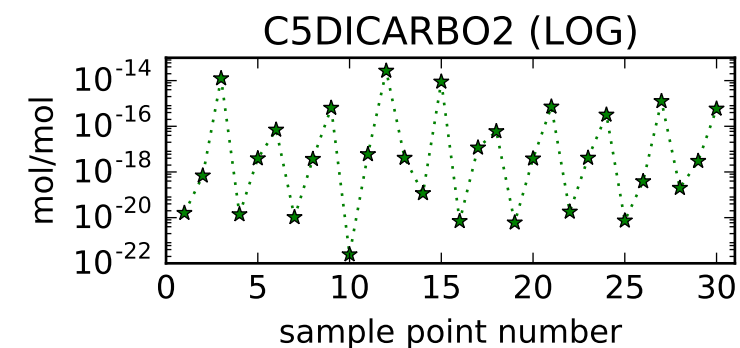

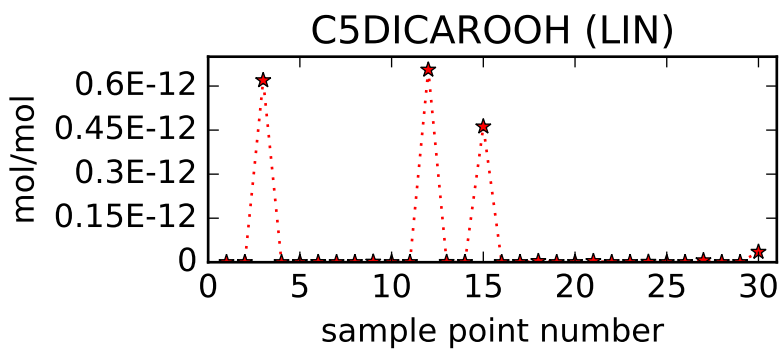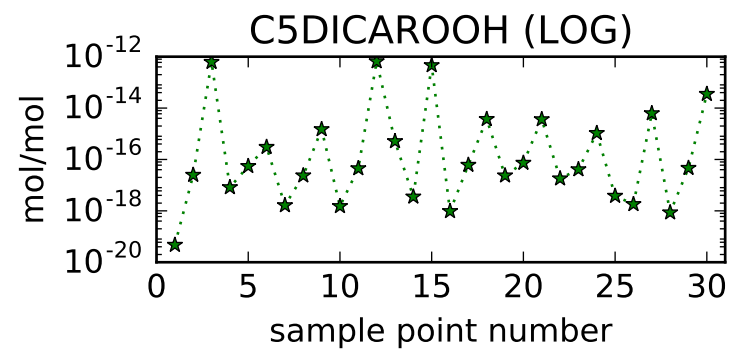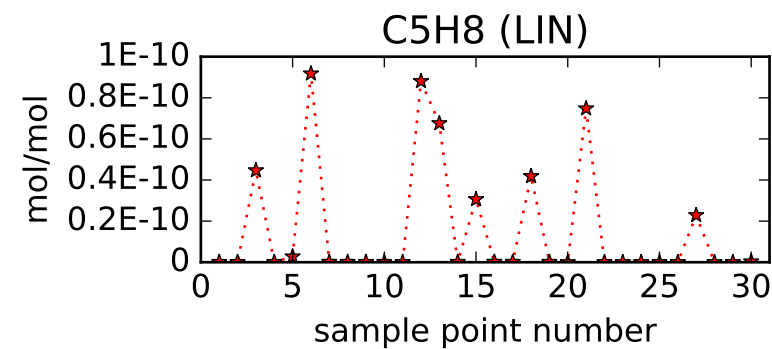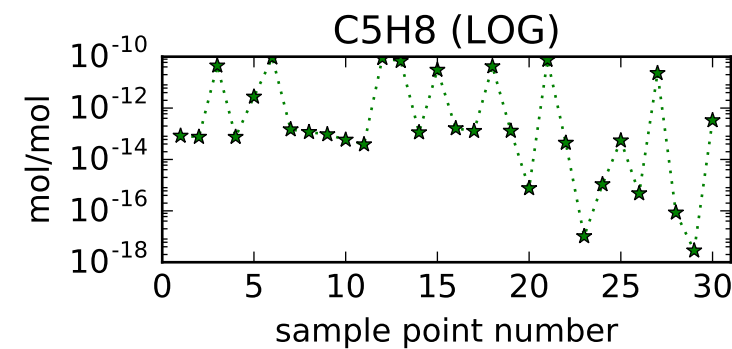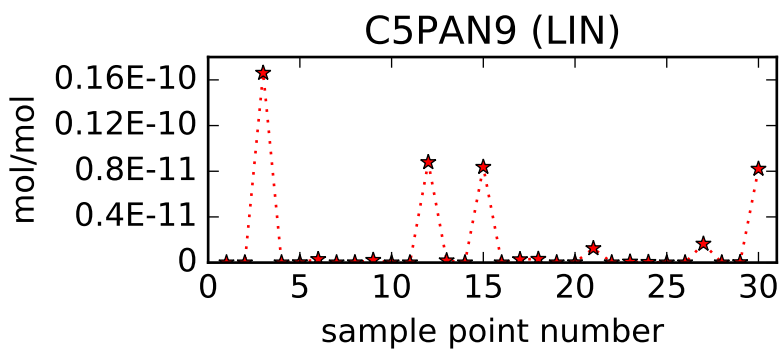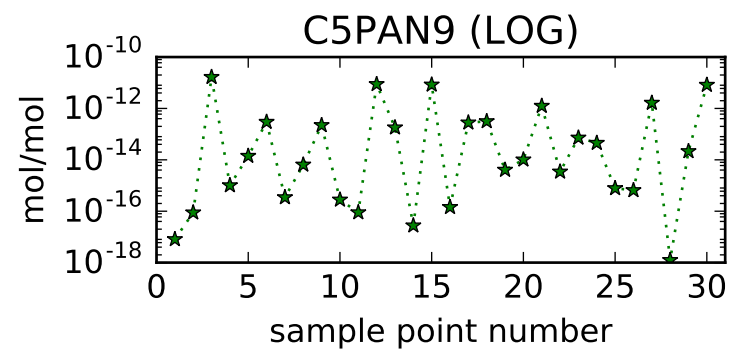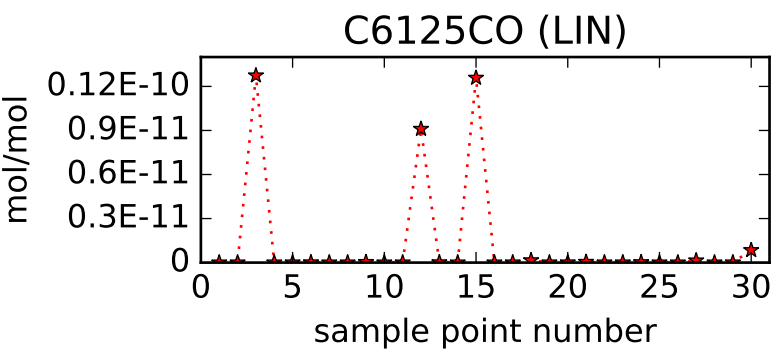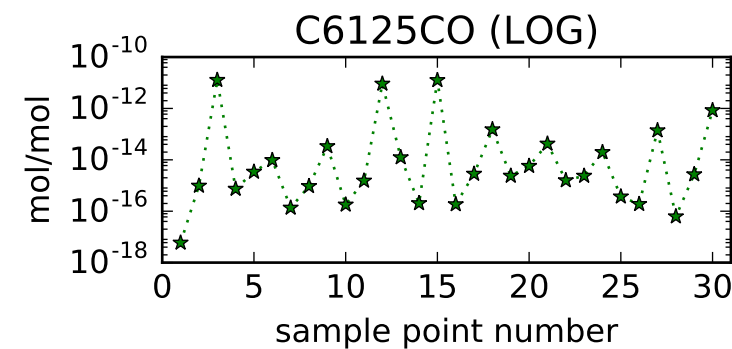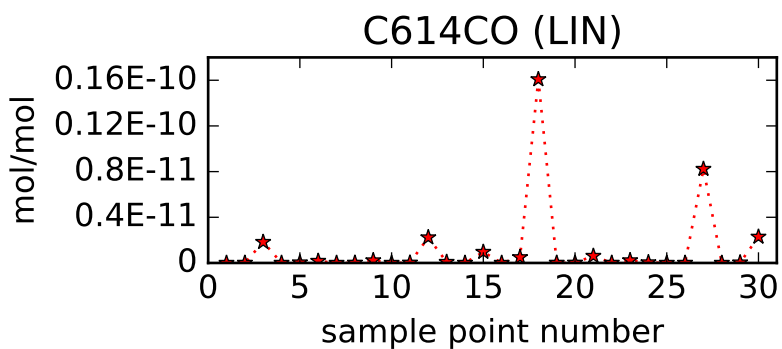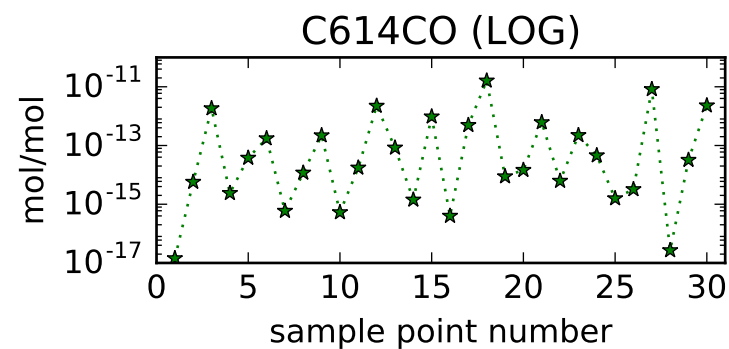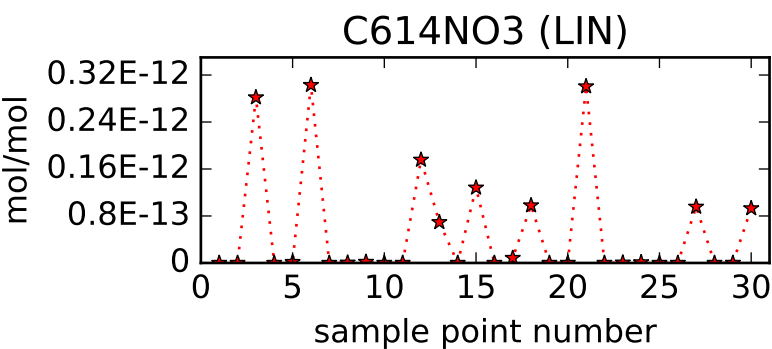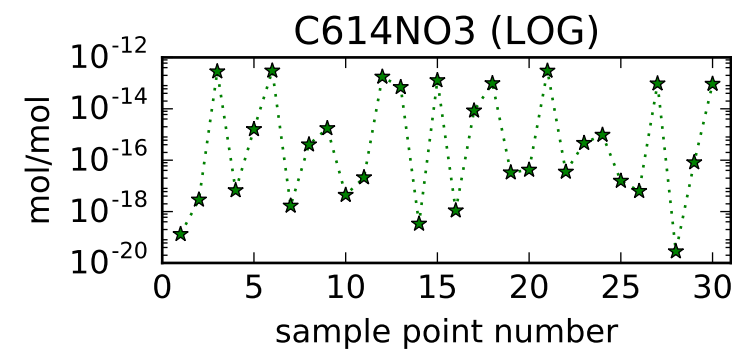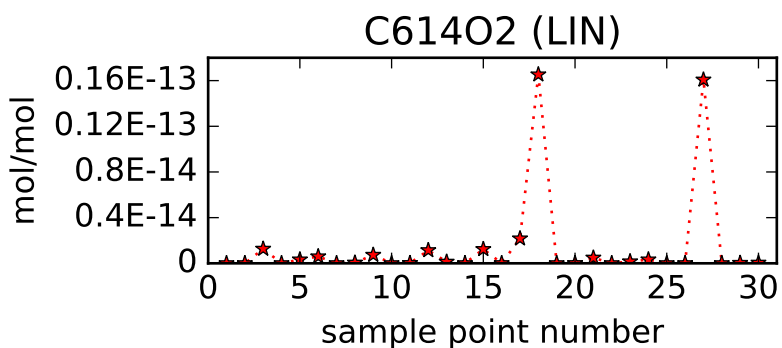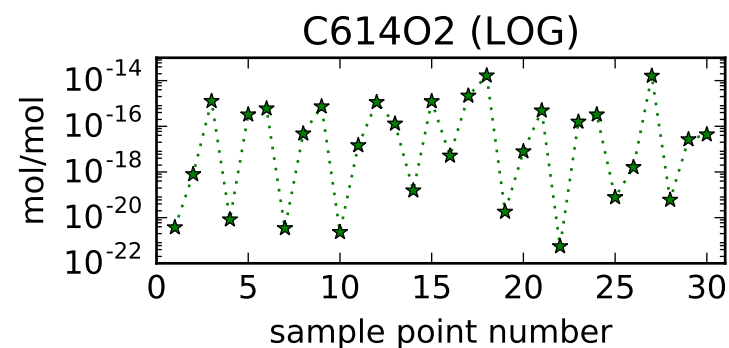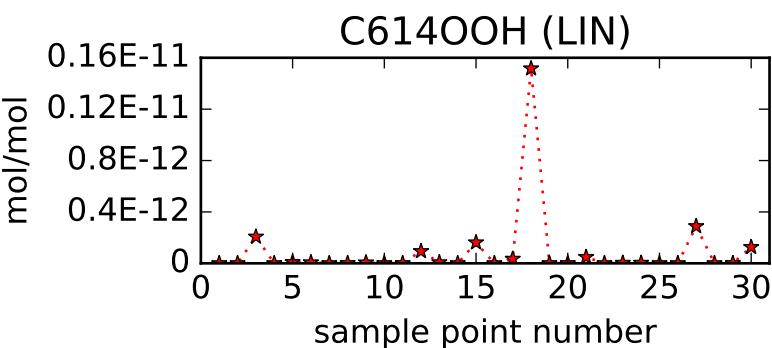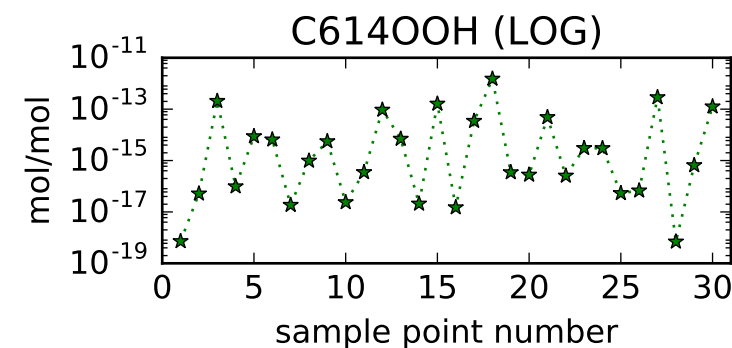

C615CO2O2 (LIN)

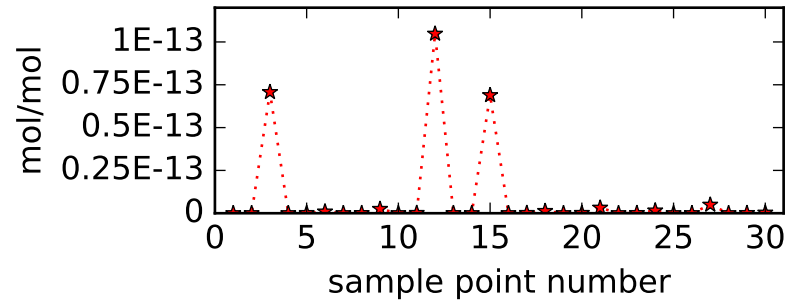

C615CO2O2 (LOG)

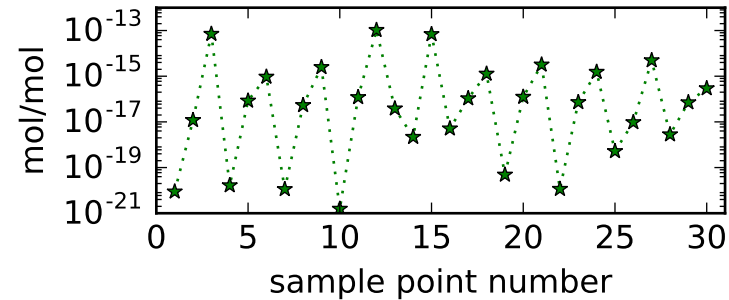

C615CO2OOH (LIN)

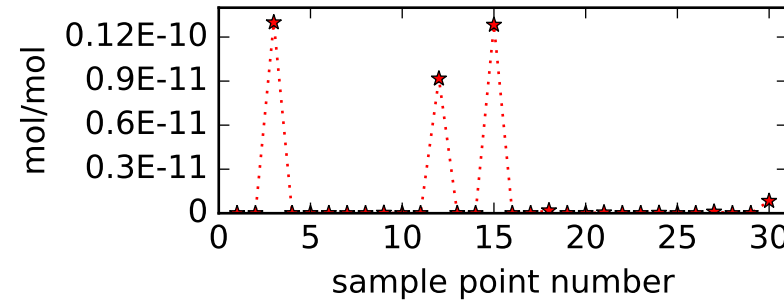

C615CO2OOH (LOG)

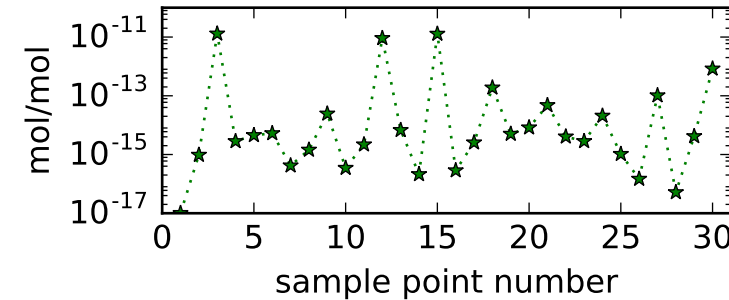

C6CO2OHCO3 (LIN)

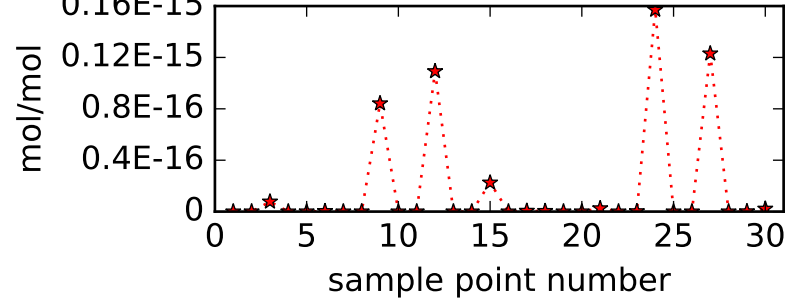

C6CO2OHCO3 (LOG)

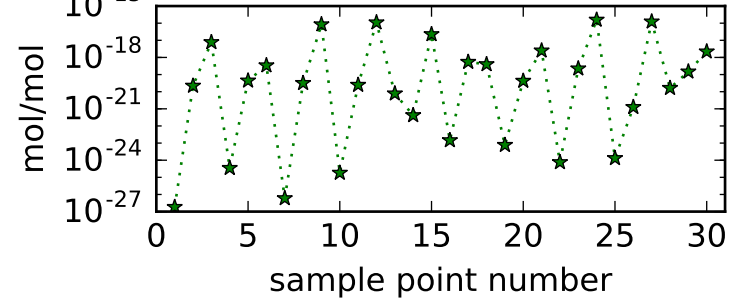

C6CO2OHPAN (LIN)

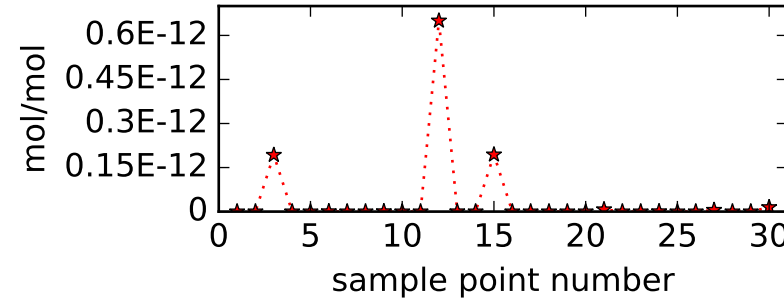

C6CO2OHPAN (LOG)

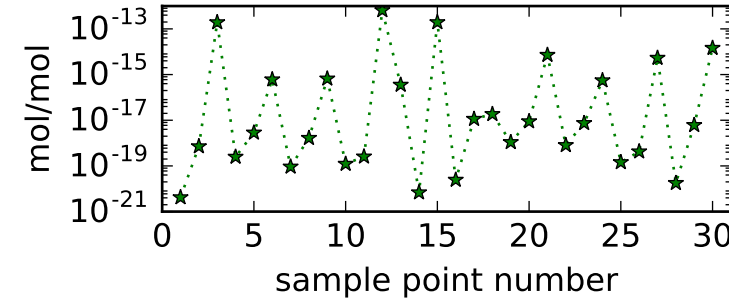

C6CO4DB (LIN)

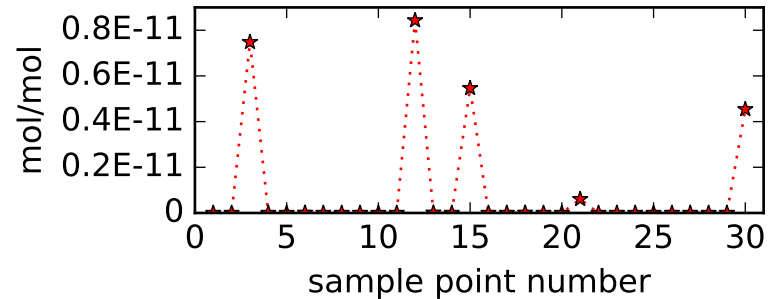

C6CO4DB (LOG)

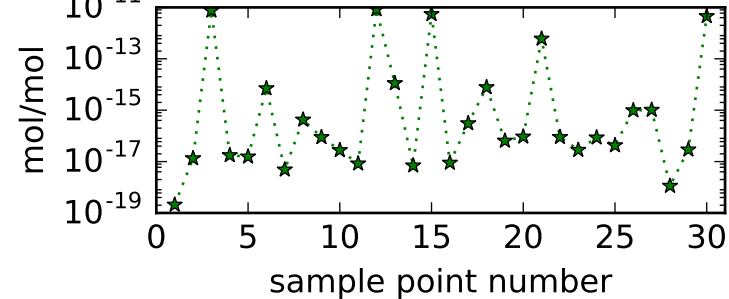

C6COOHCO3H (LIN)

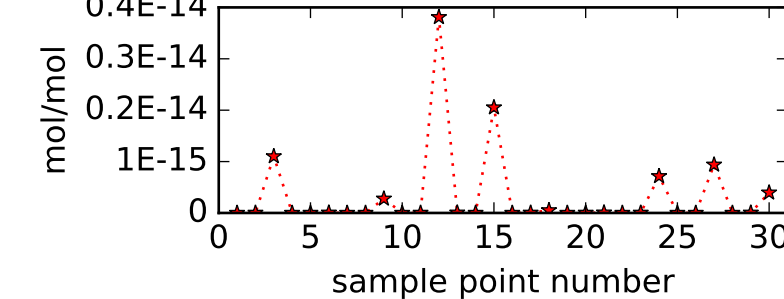

C6COOHCO3H (LOG)

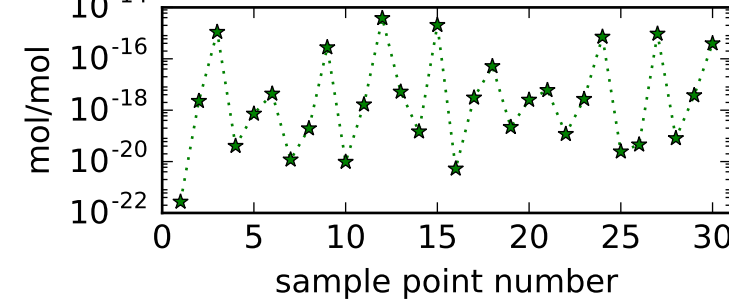

C6H5CH2NO3 (LIN)

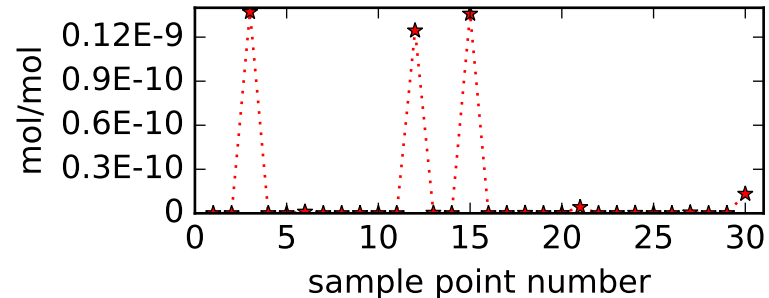

C6H5CH2NO3 (LOG)

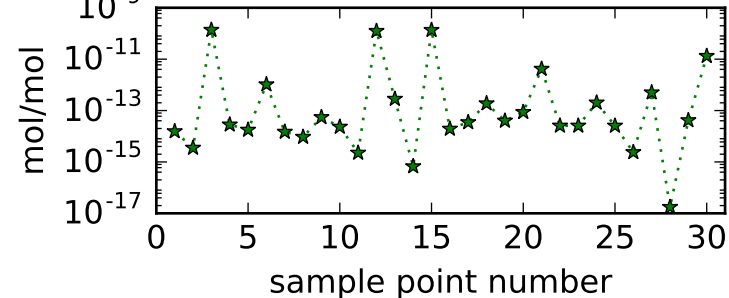

C6H5CH2O2 (LIN)

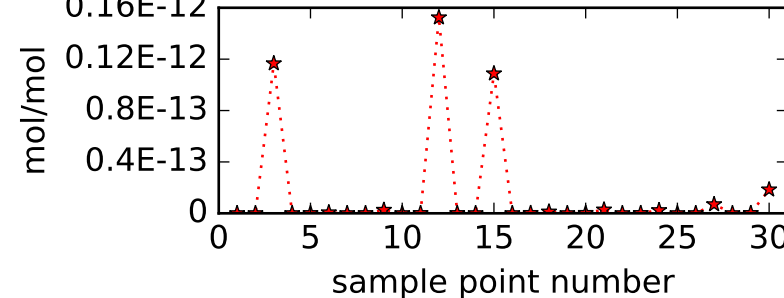

C6H5CH2O2 (LOG)

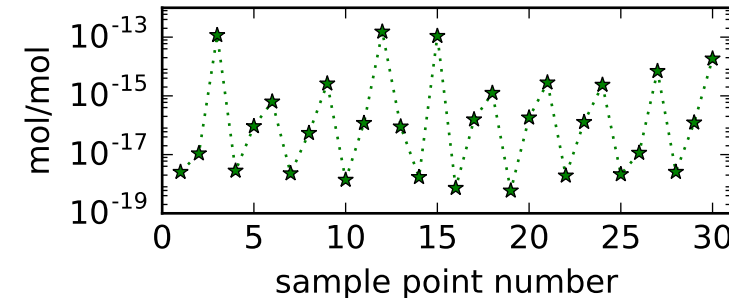



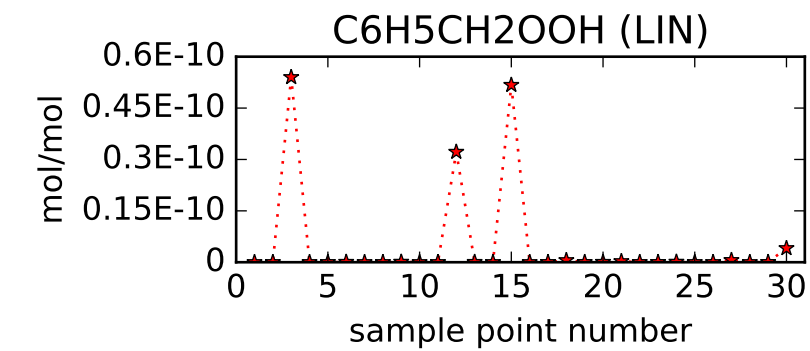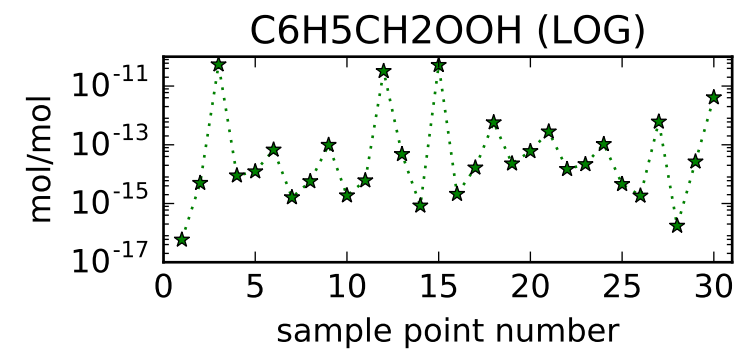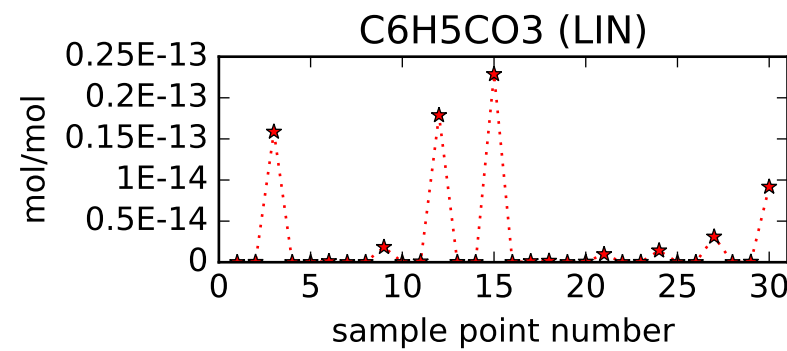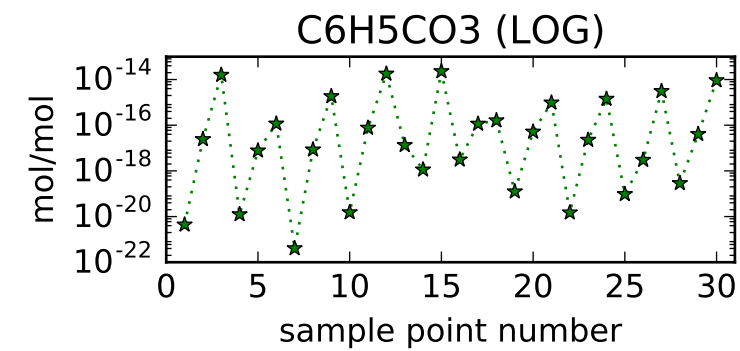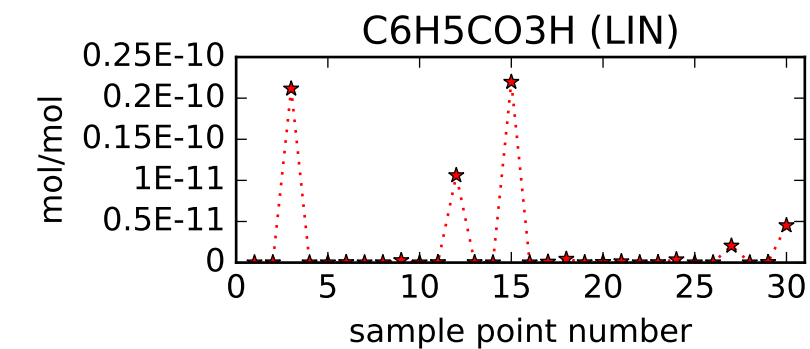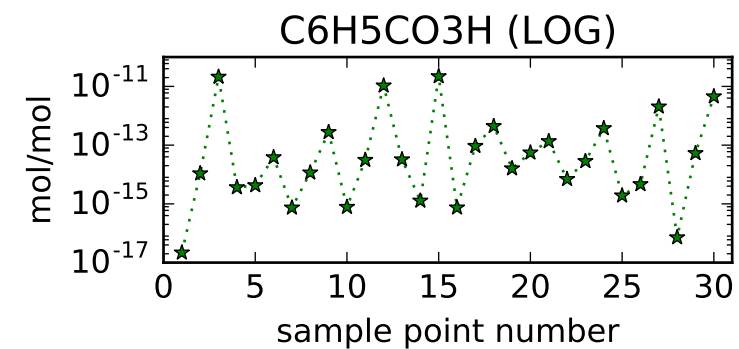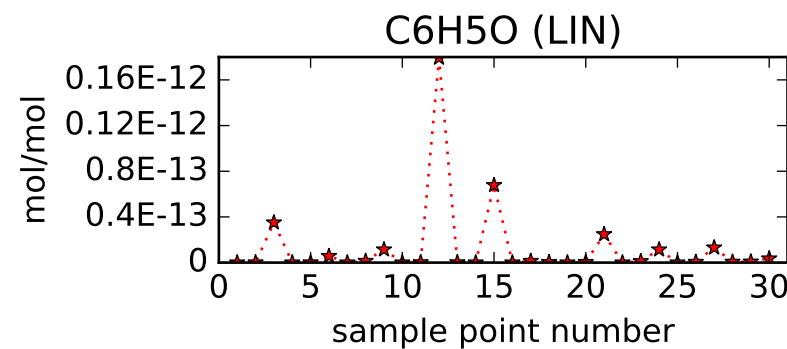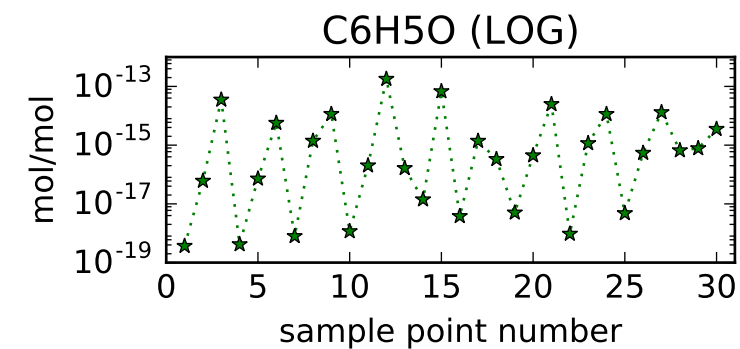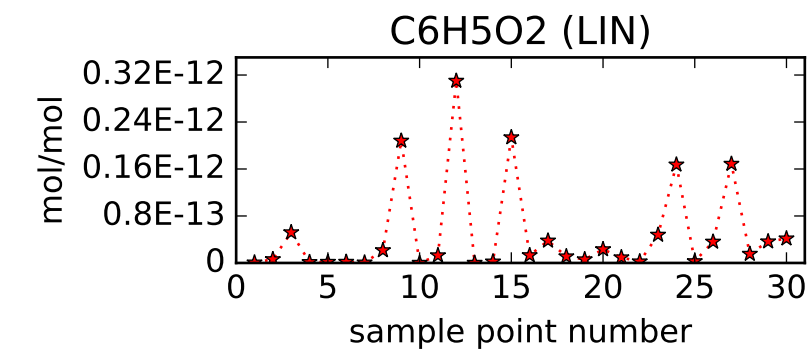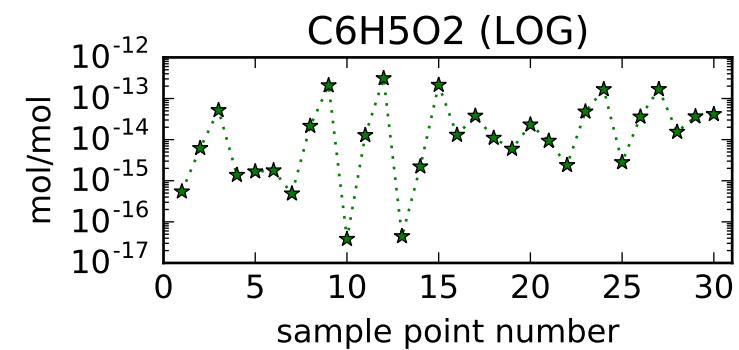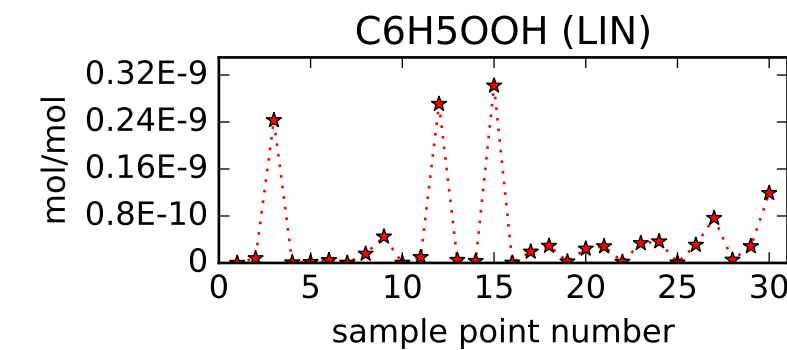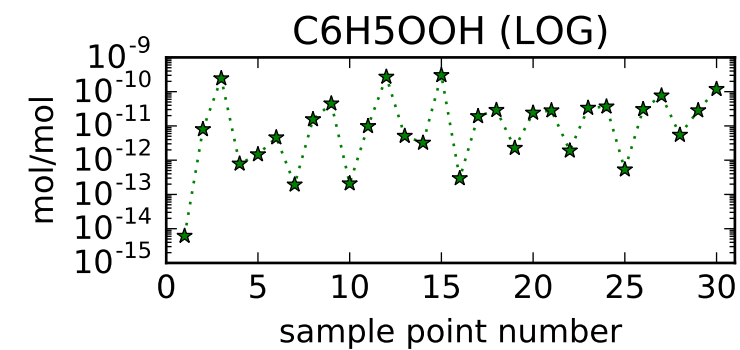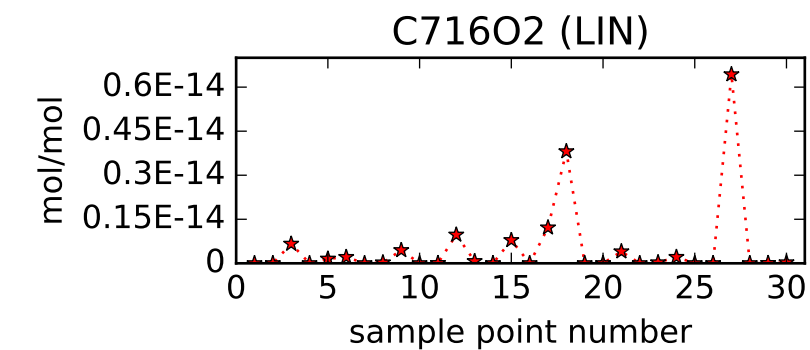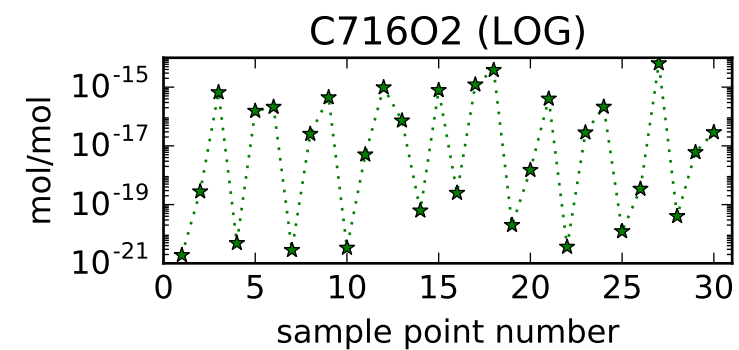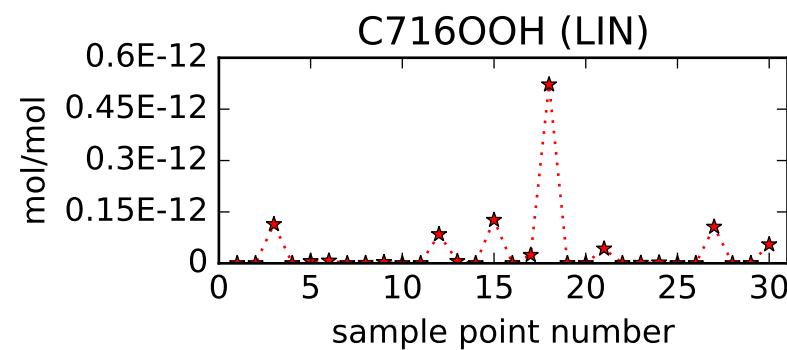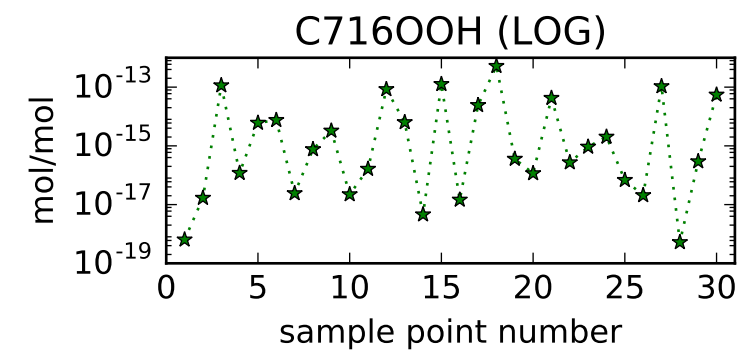

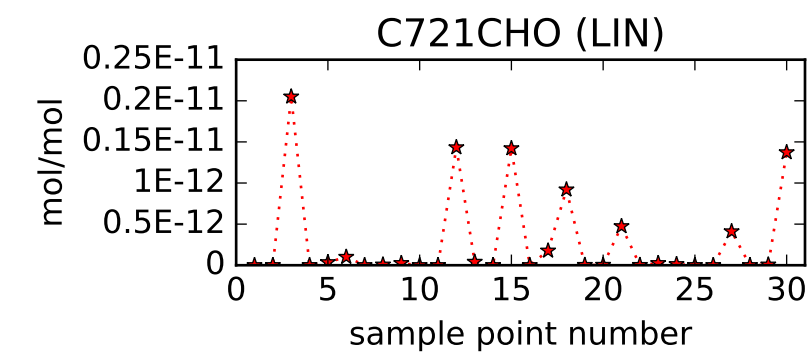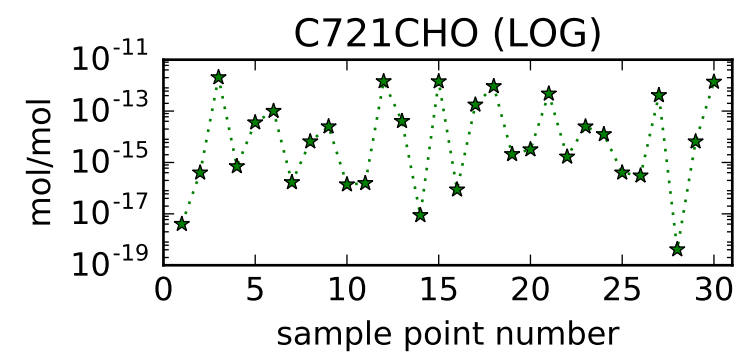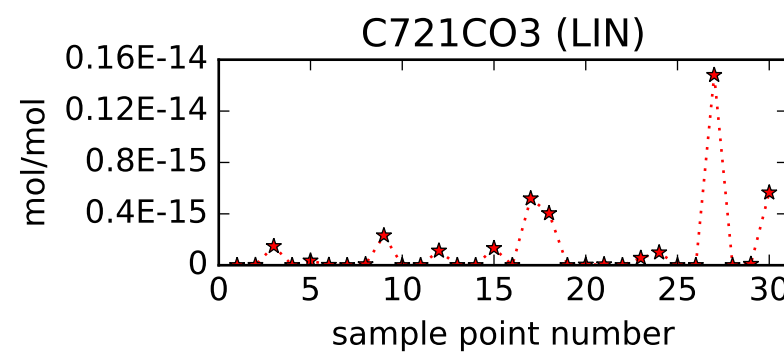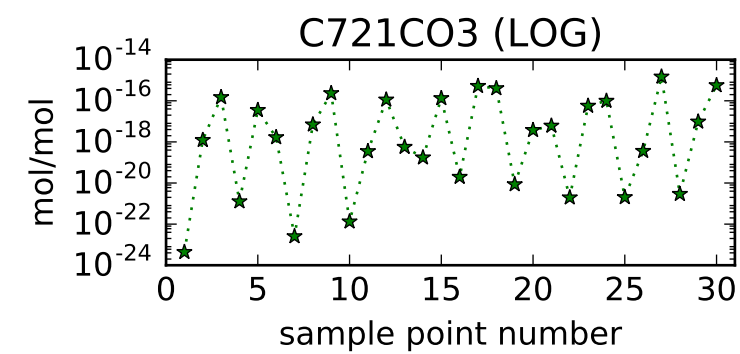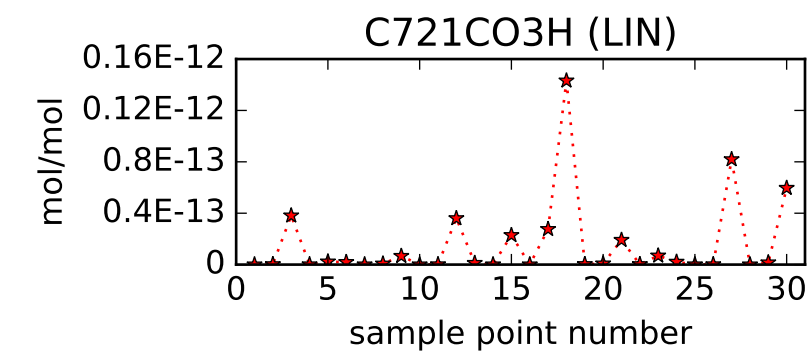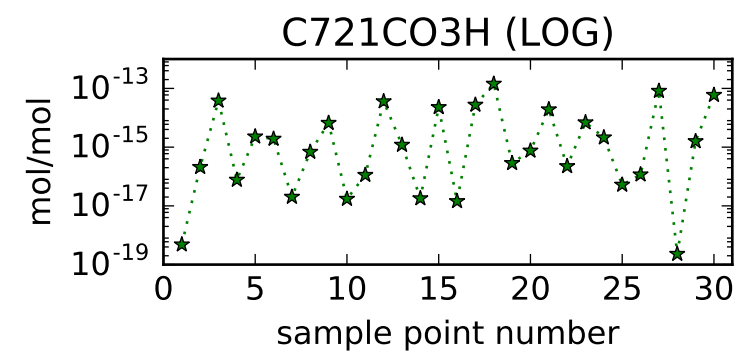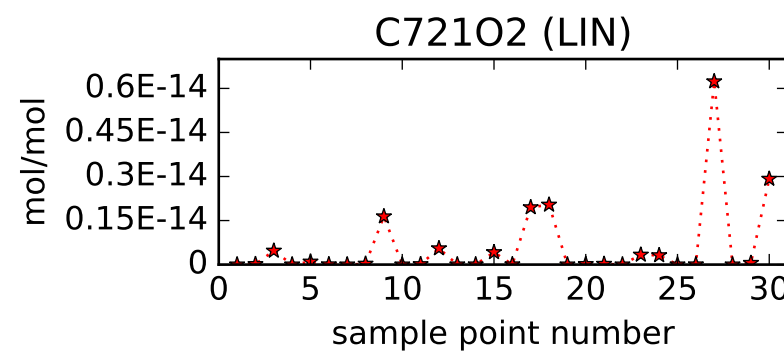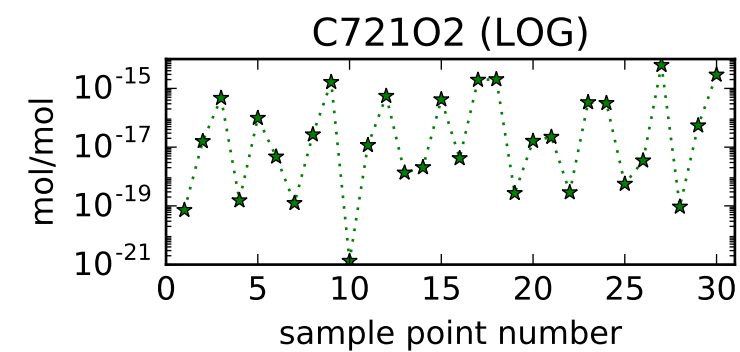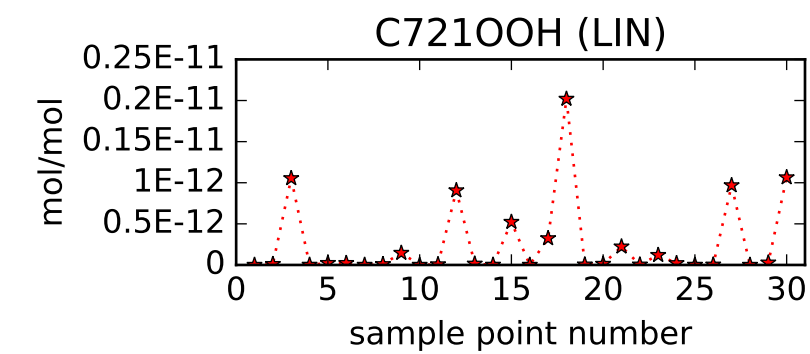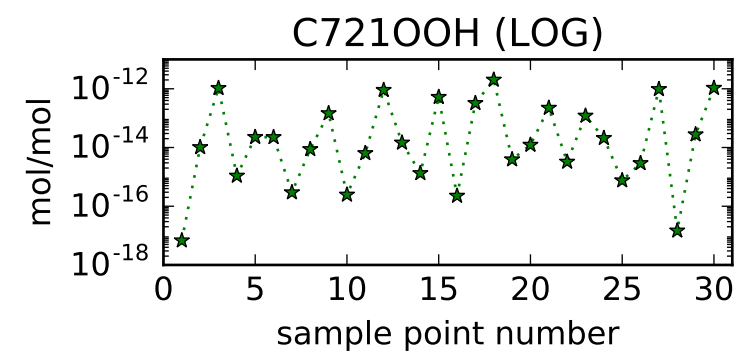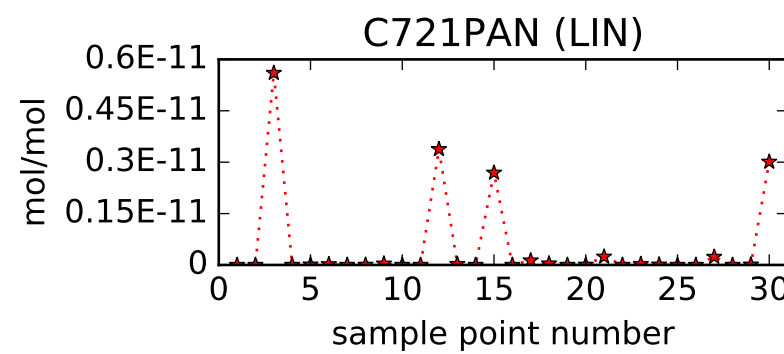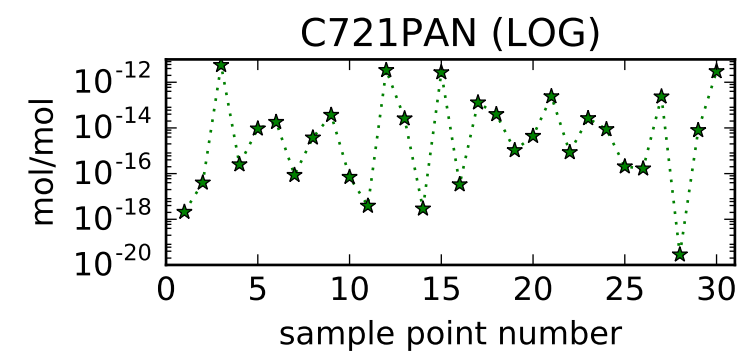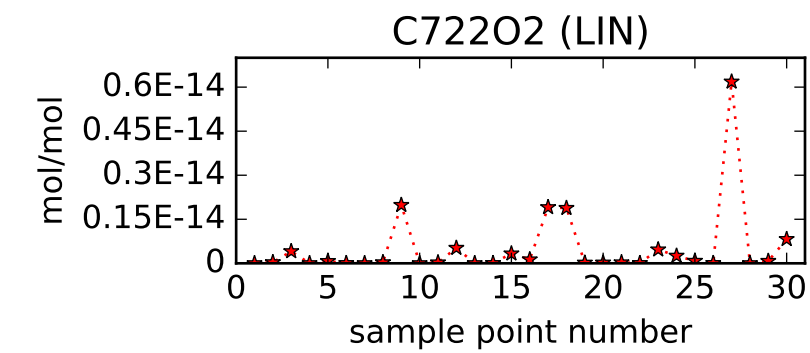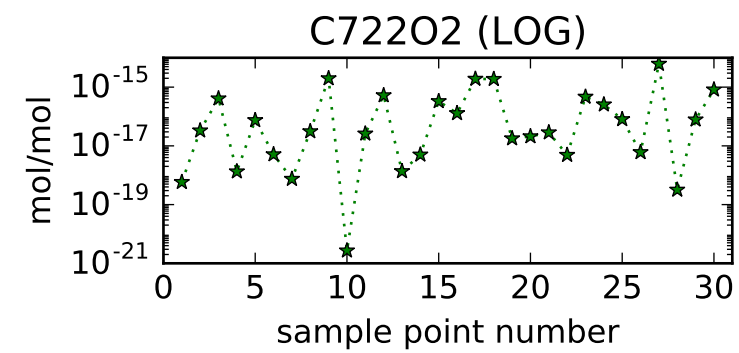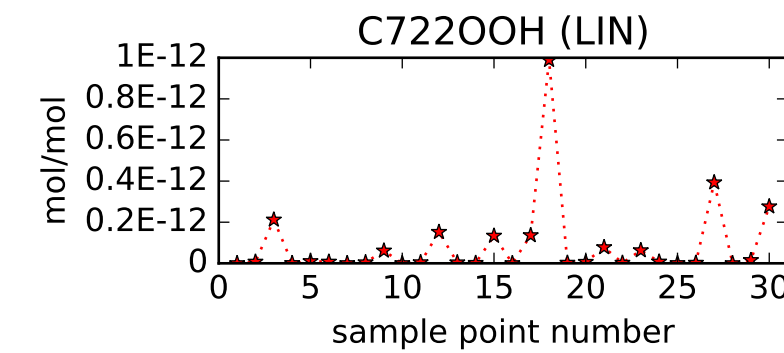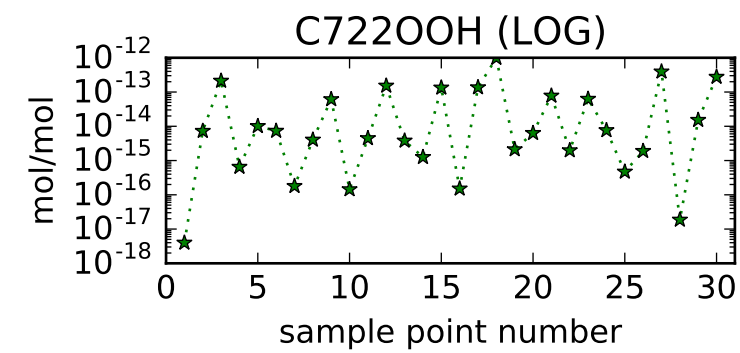

C7CO4DB (LIN)

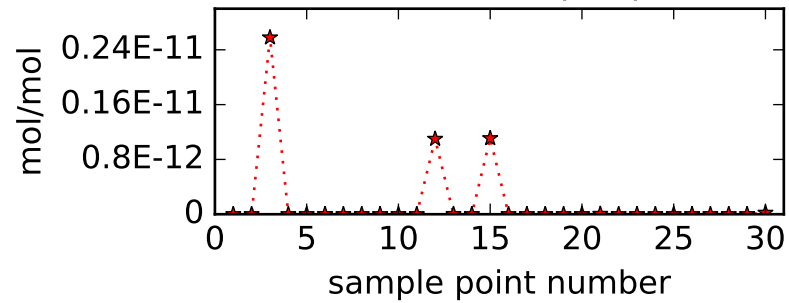

C7CO4DB (LOG)

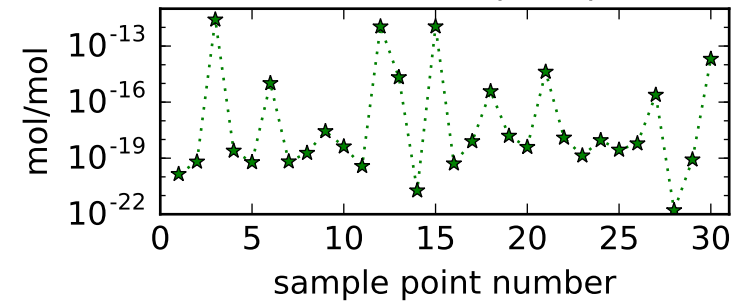

C7PAN3 (LIN)

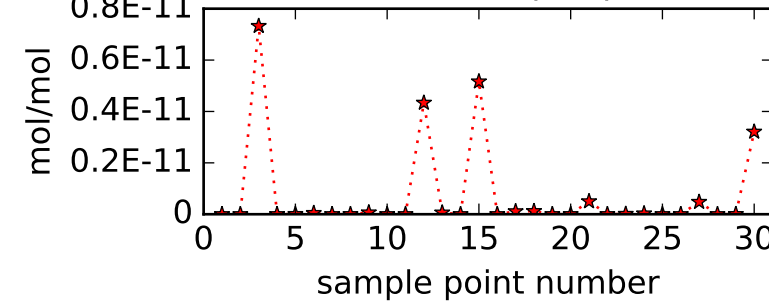

C7PAN3 (LOG)

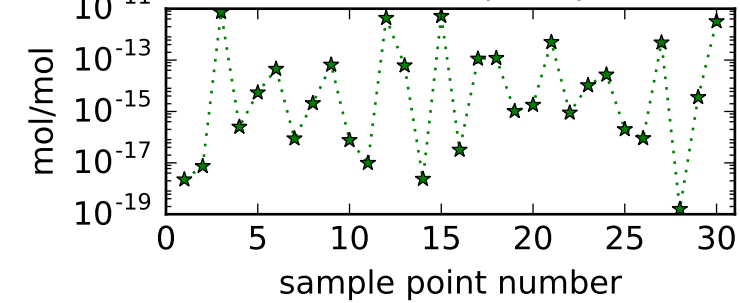

C810NO3 (LIN)

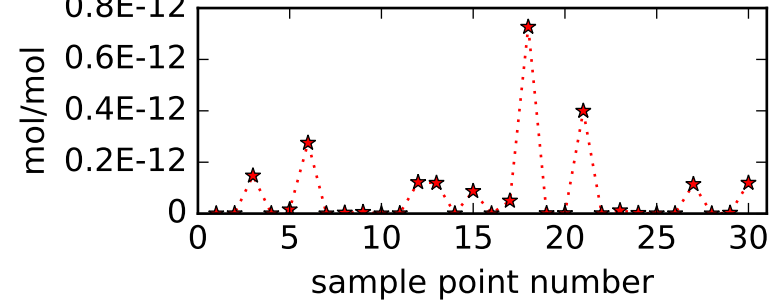

C810NO3 (LOG)

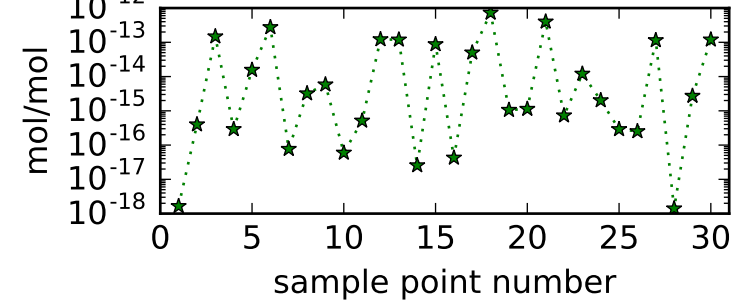

C810O2 (LIN)

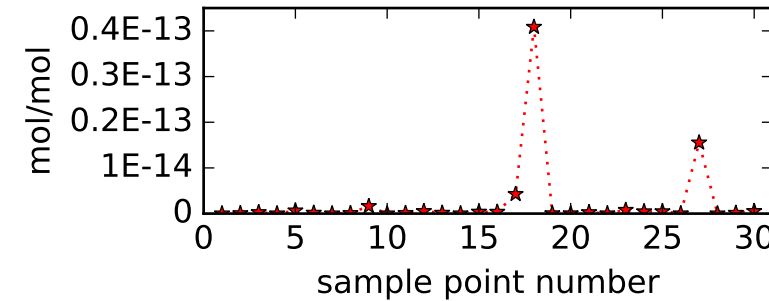

C810O2 (LOG)

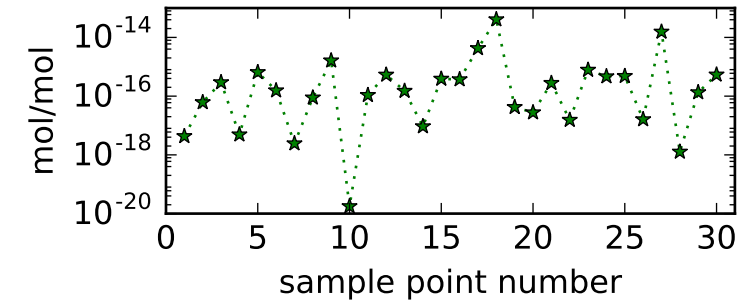

C810OOH (LIN)

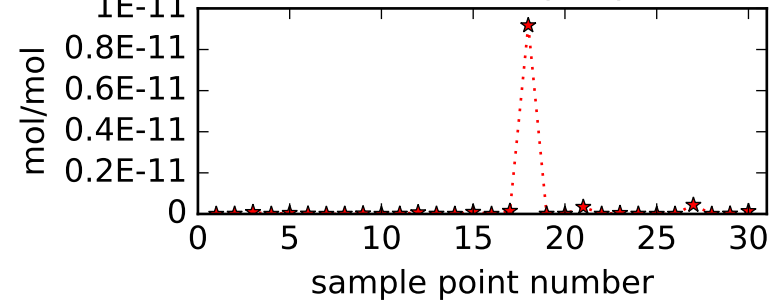

C810OOH (LOG)

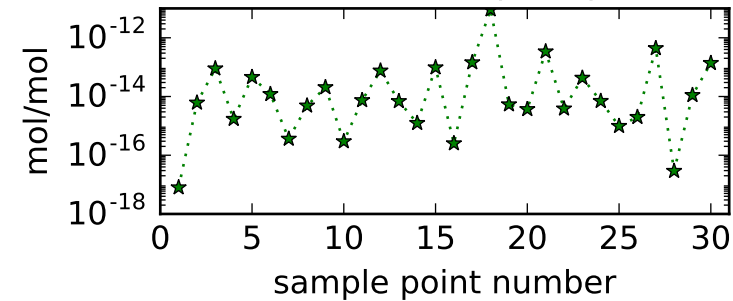

C811CO3 (LIN)

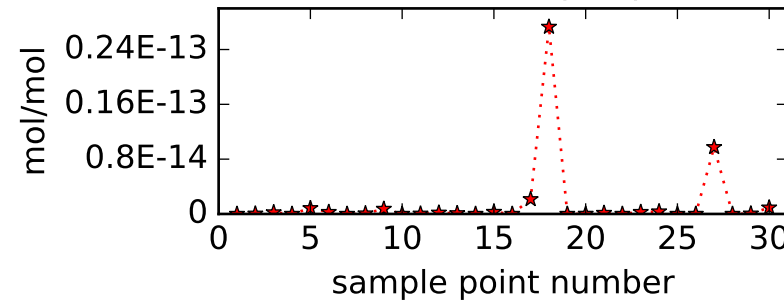

C811CO3 (LOG)

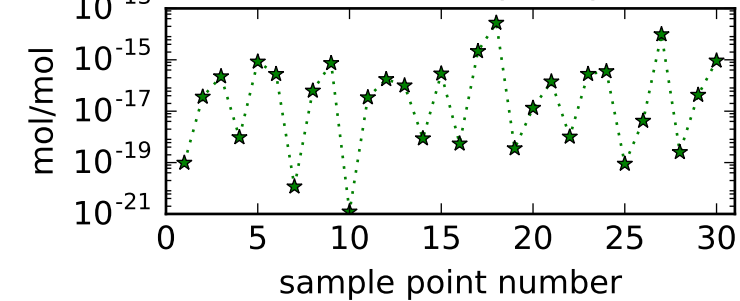

C811CO3H (LIN)

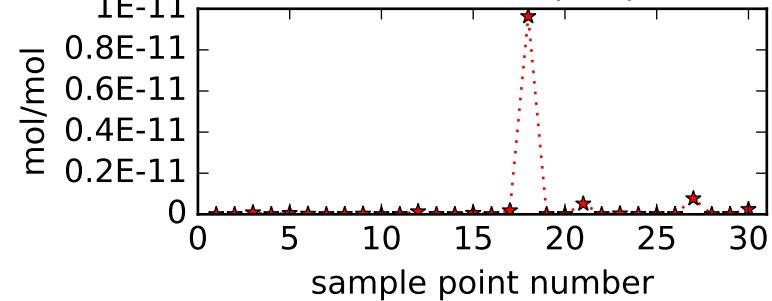

C811CO3H (LOG)

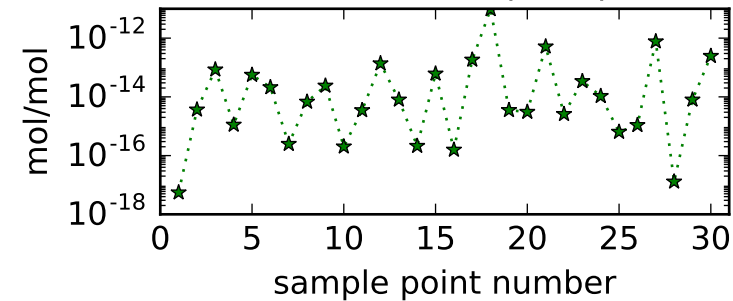

C811O2 (LIN)

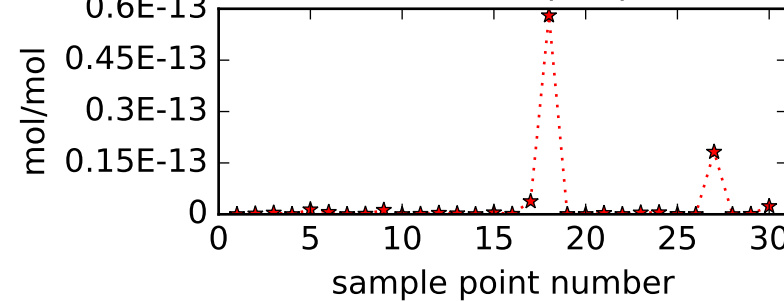

C811O2 (LOG)

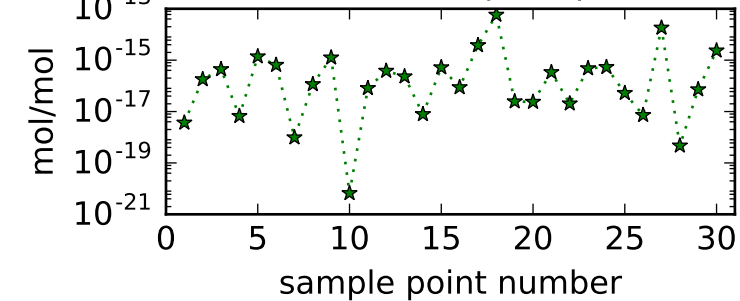

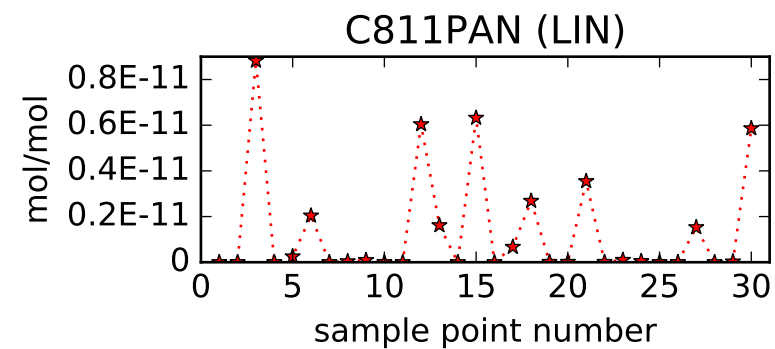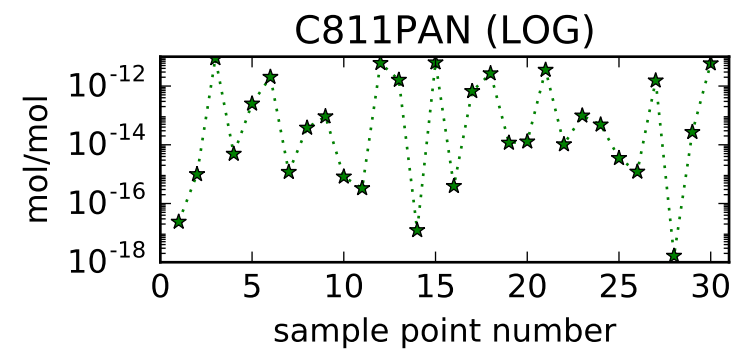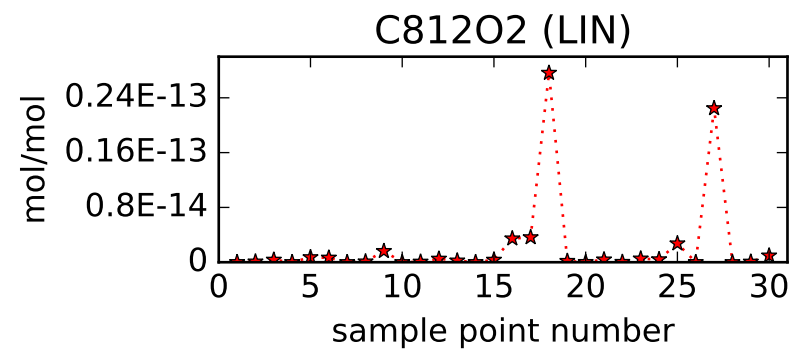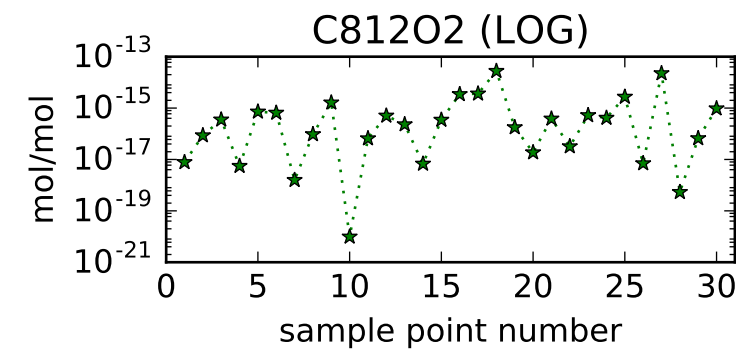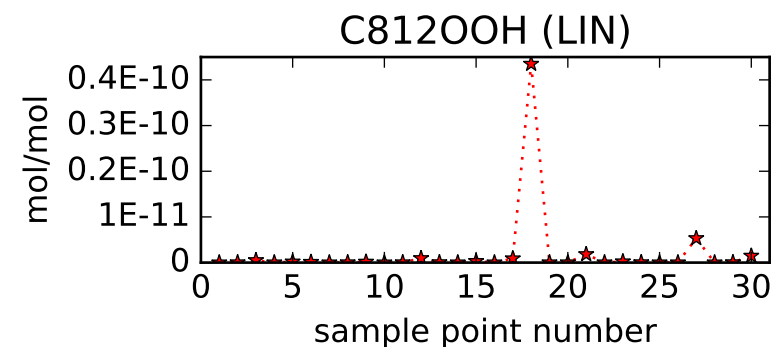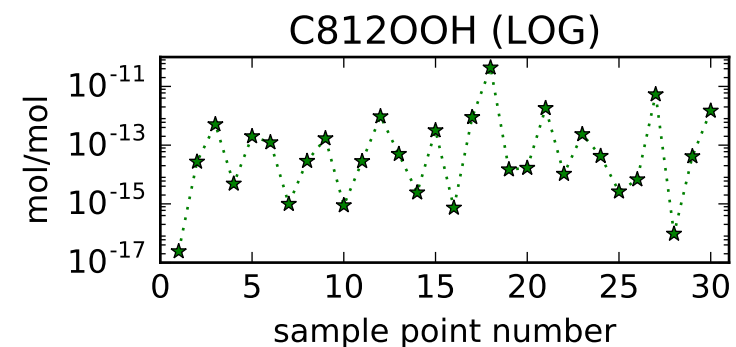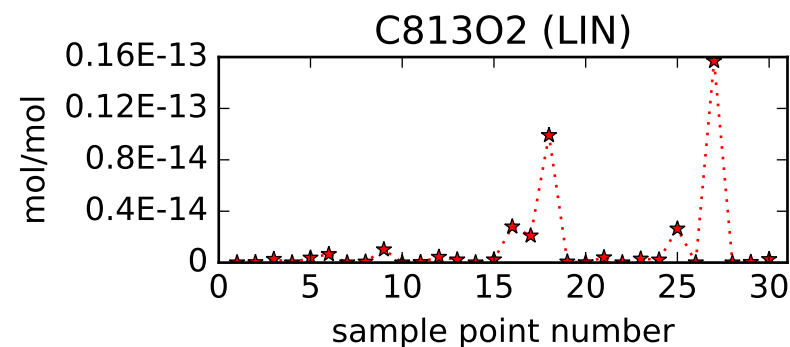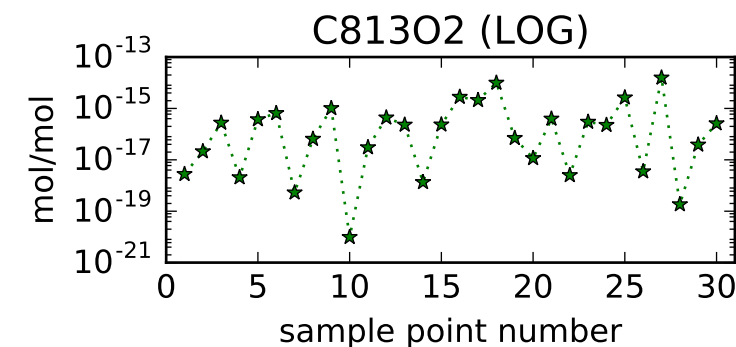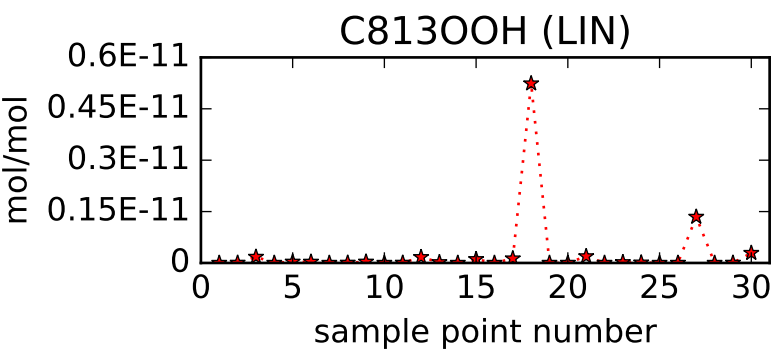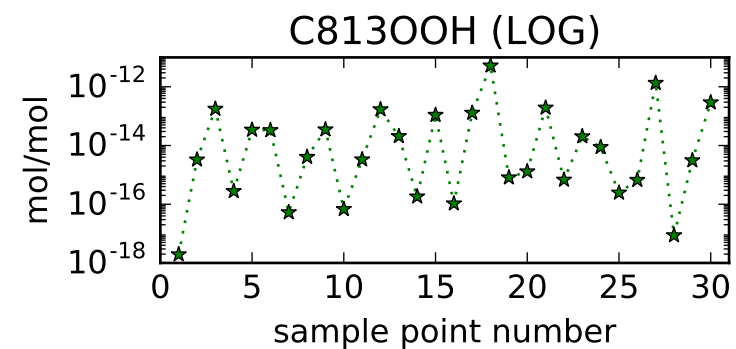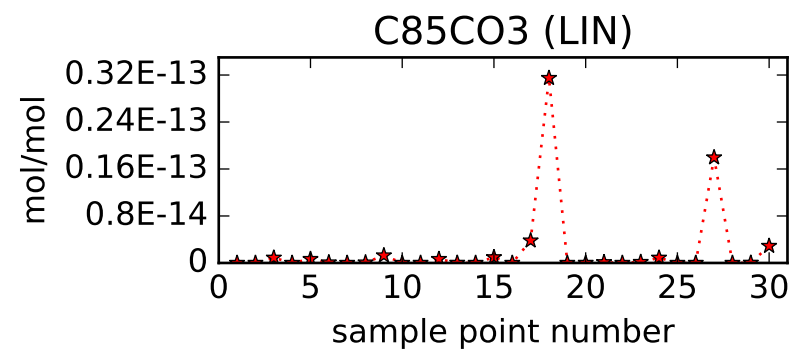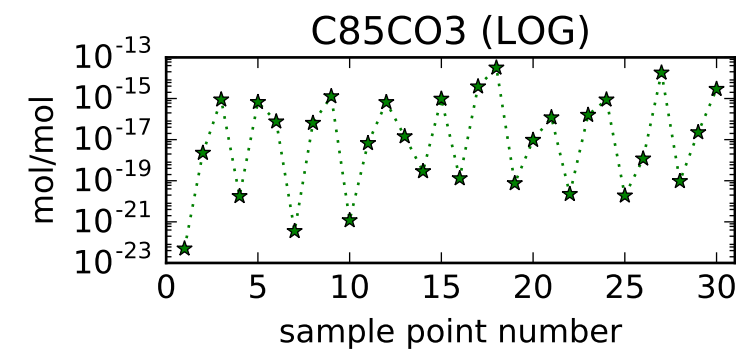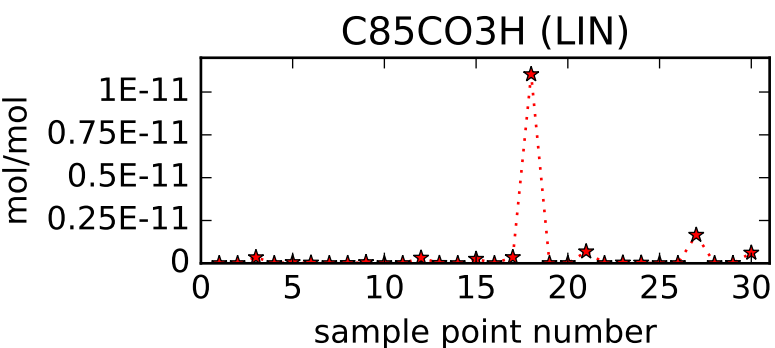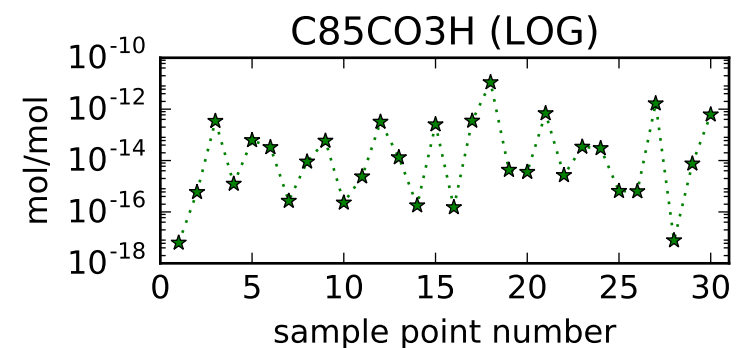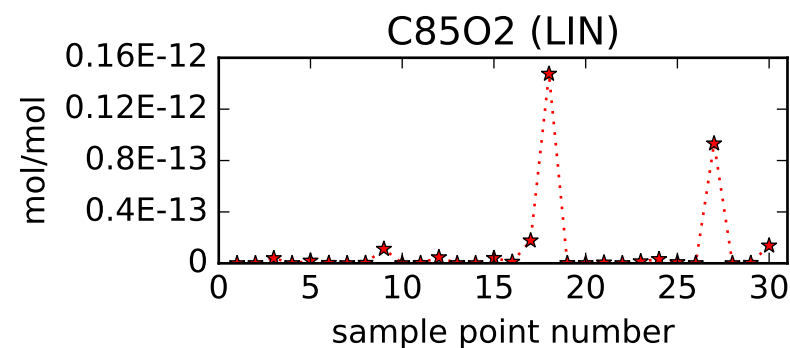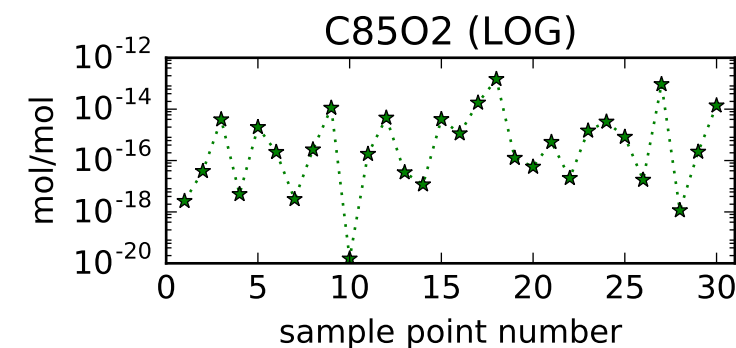

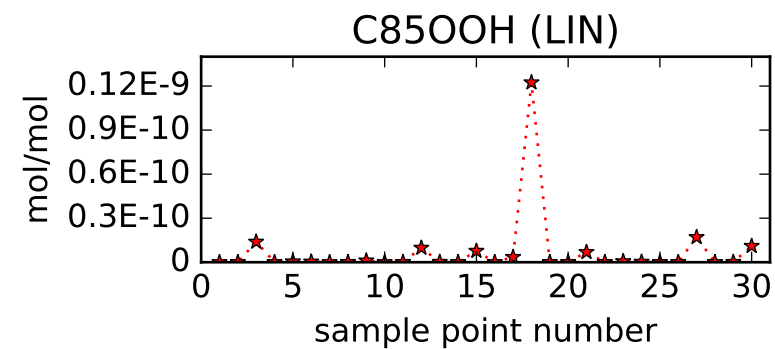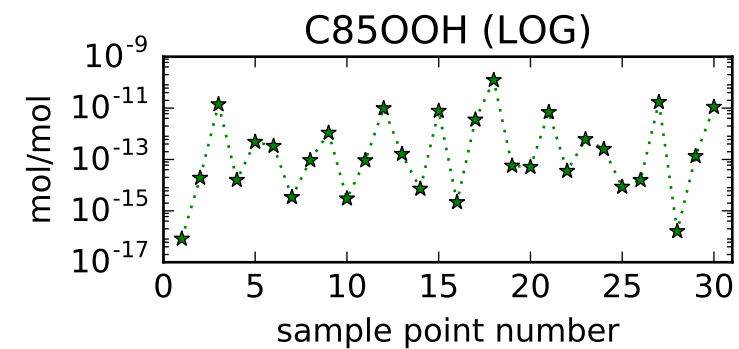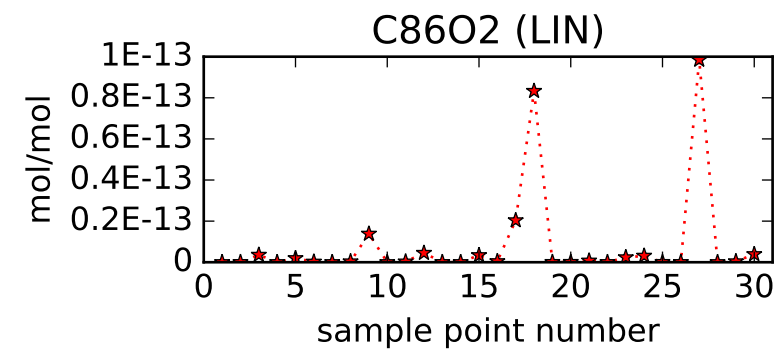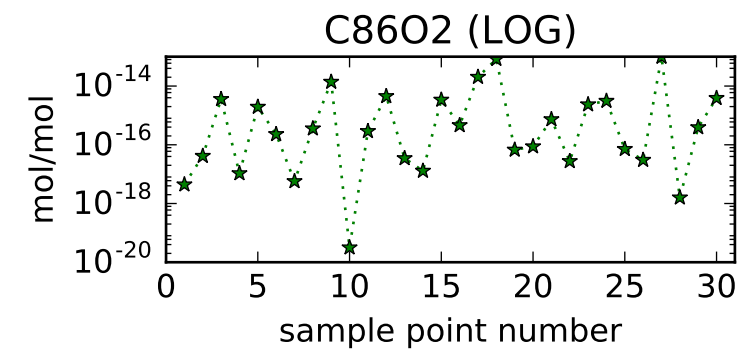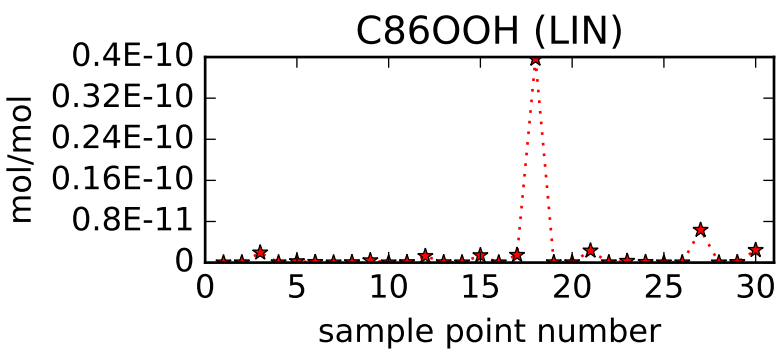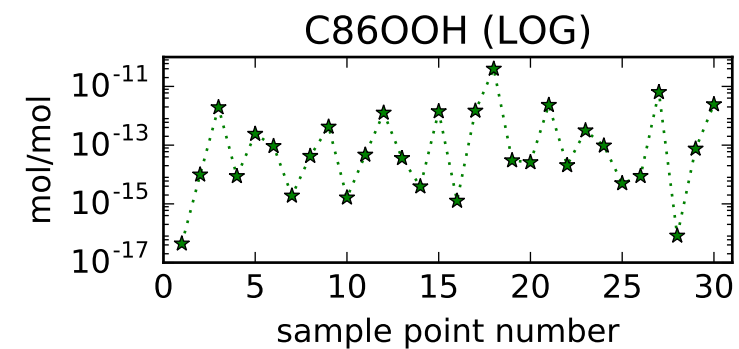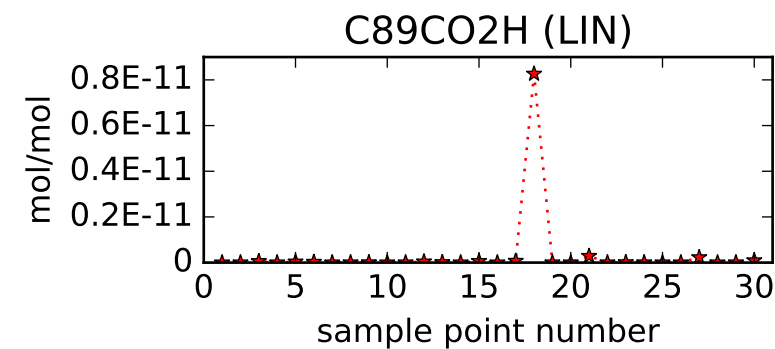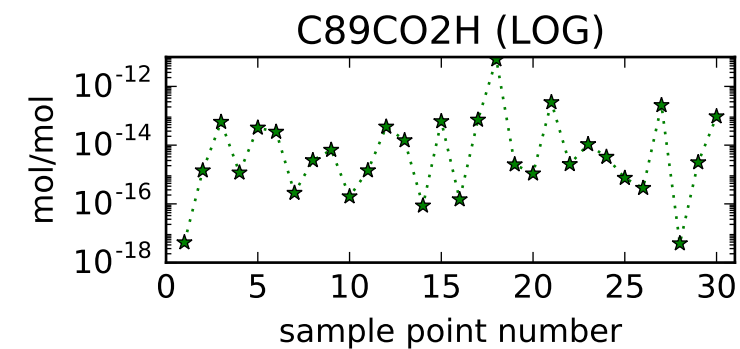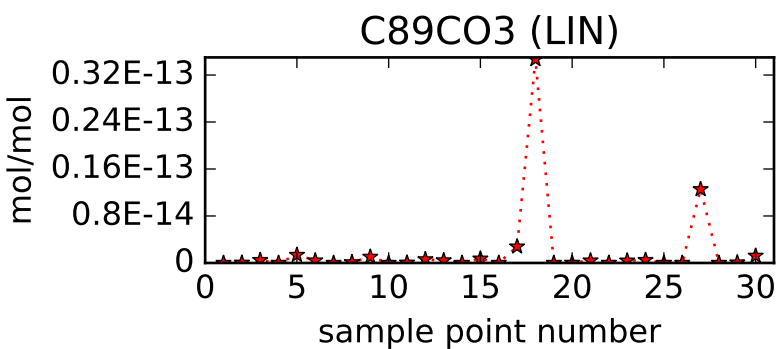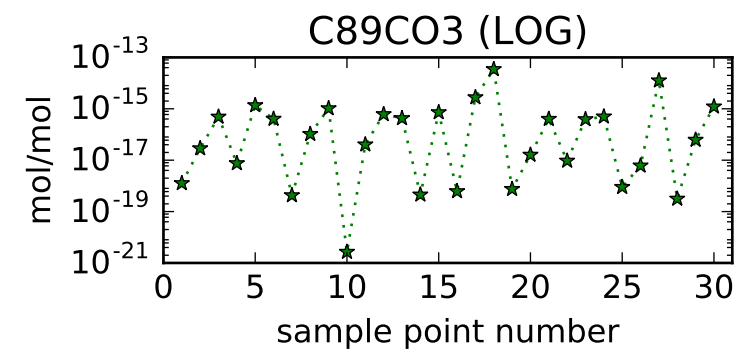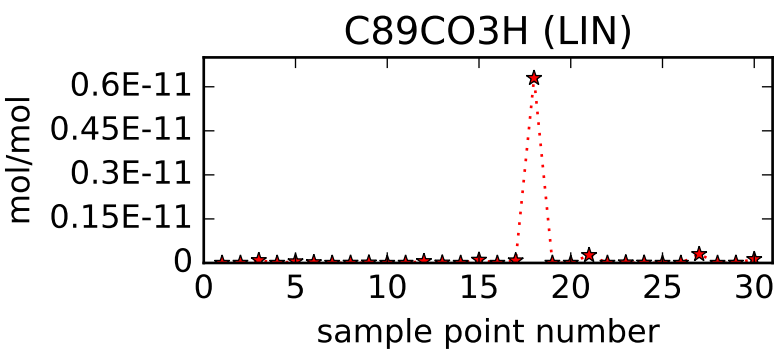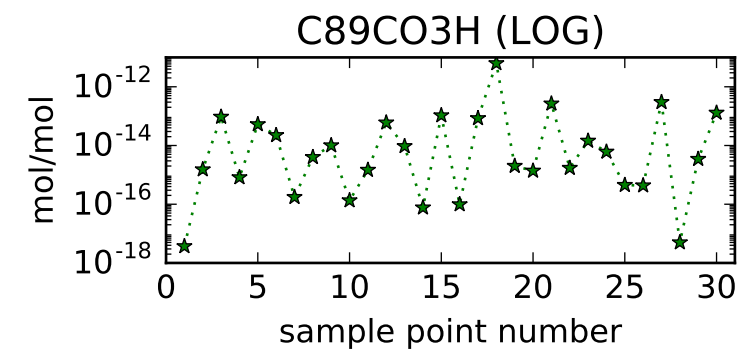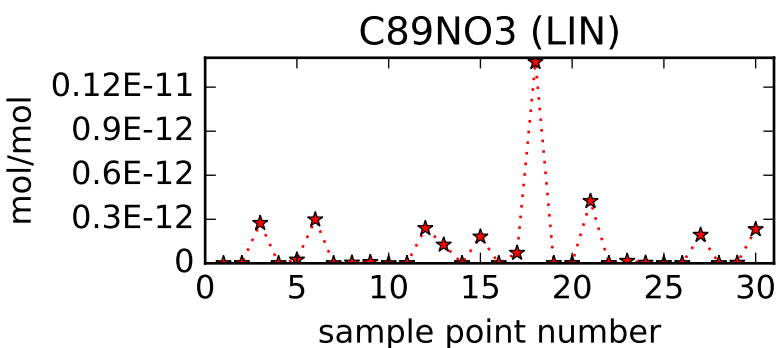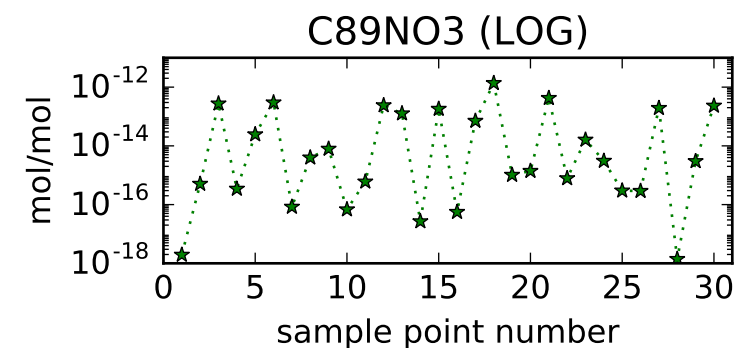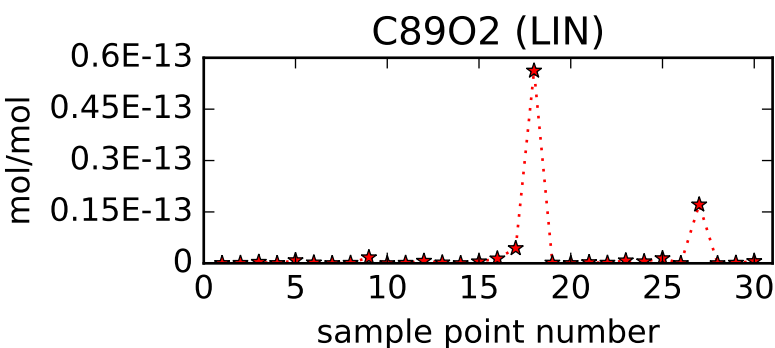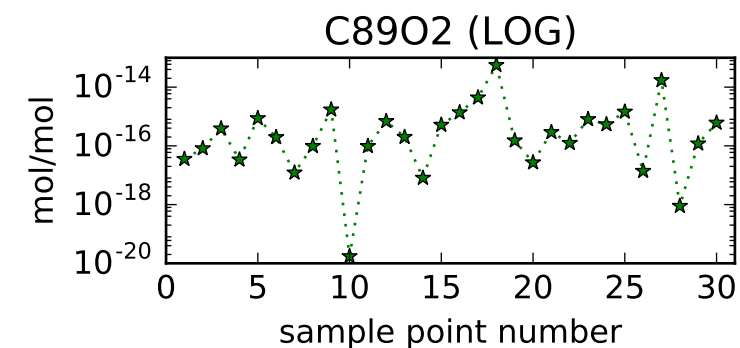



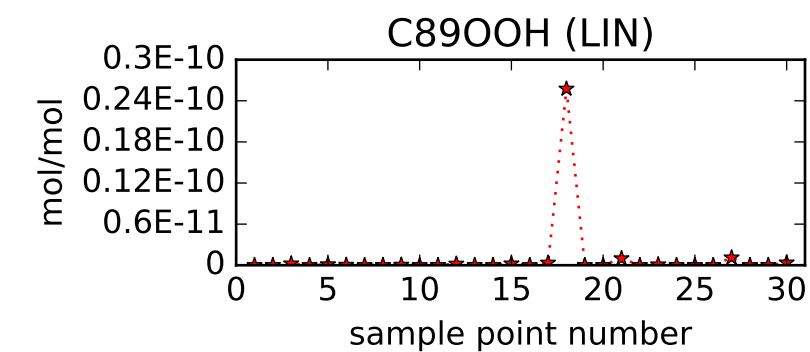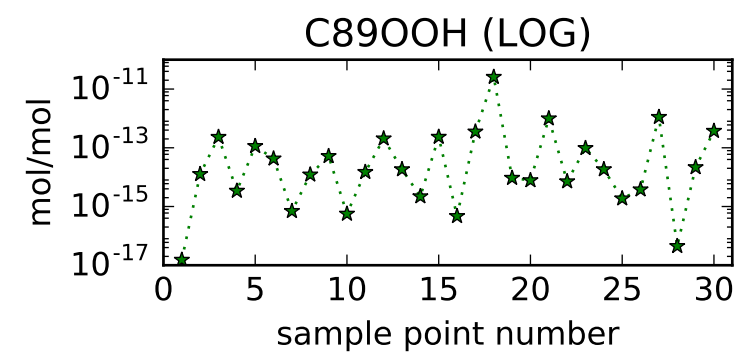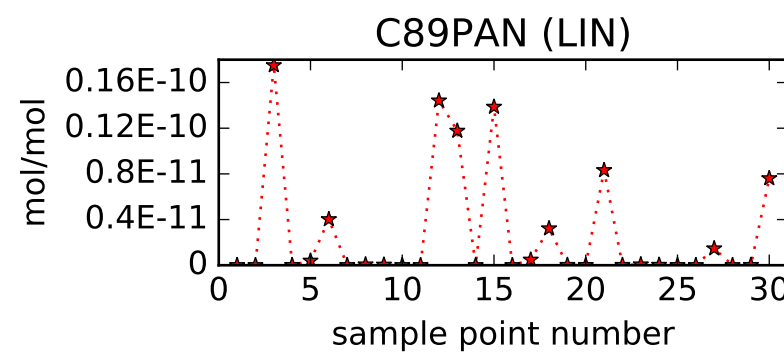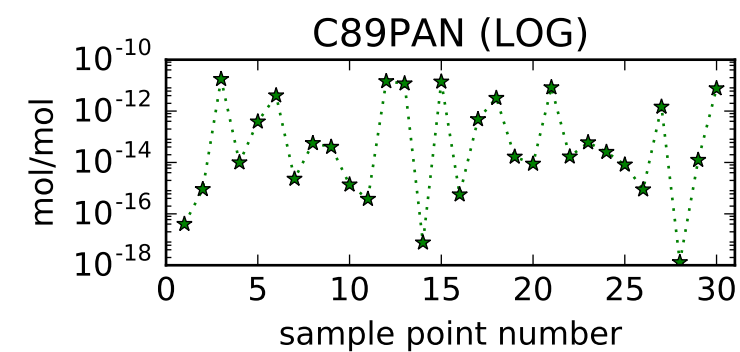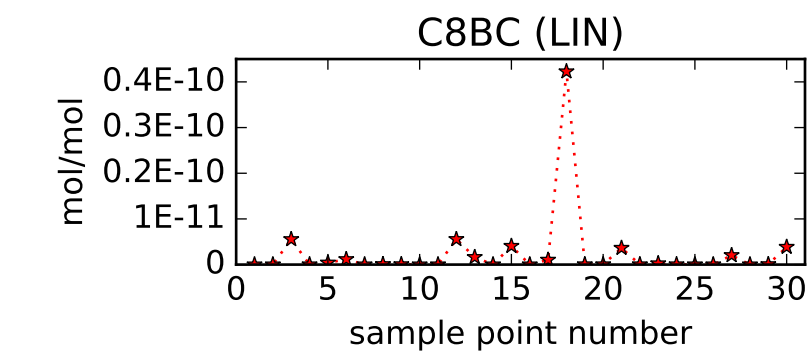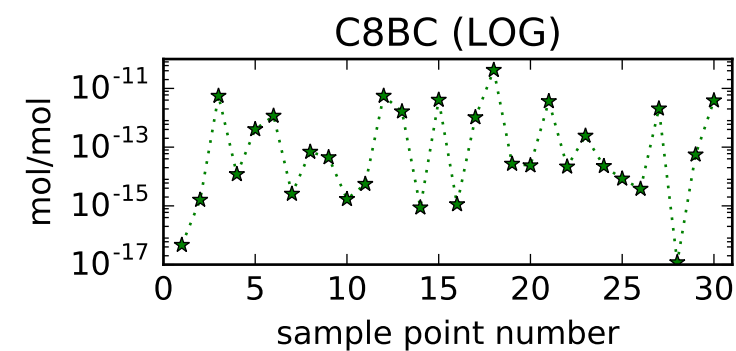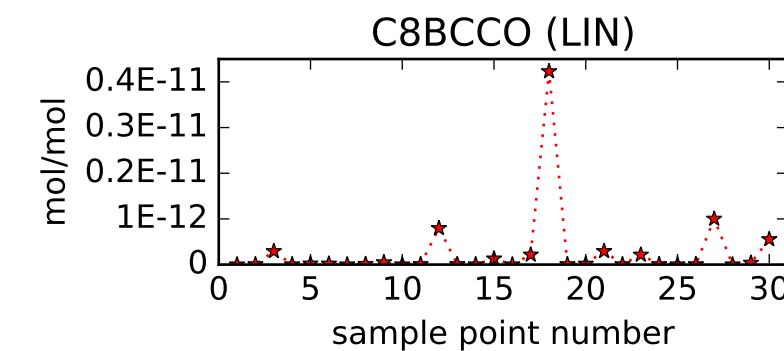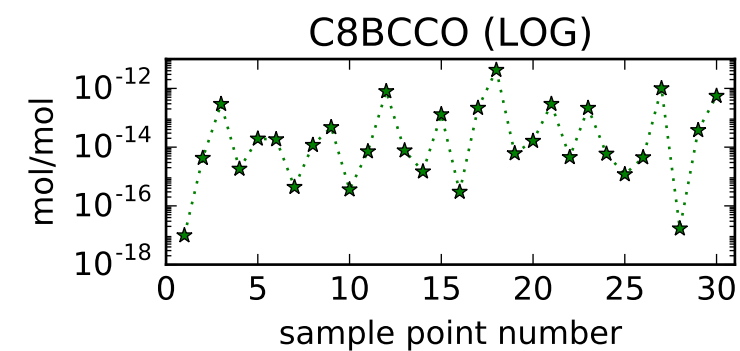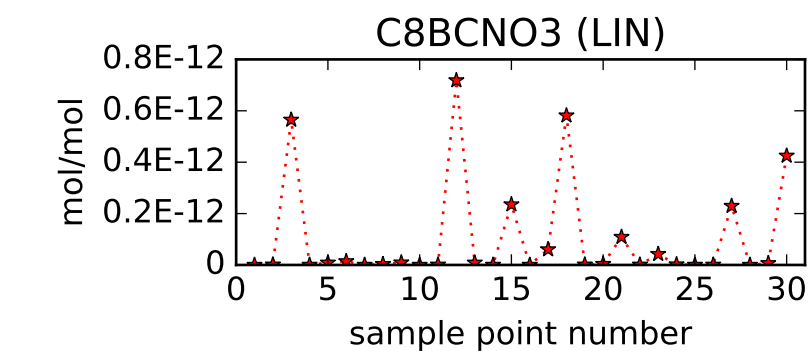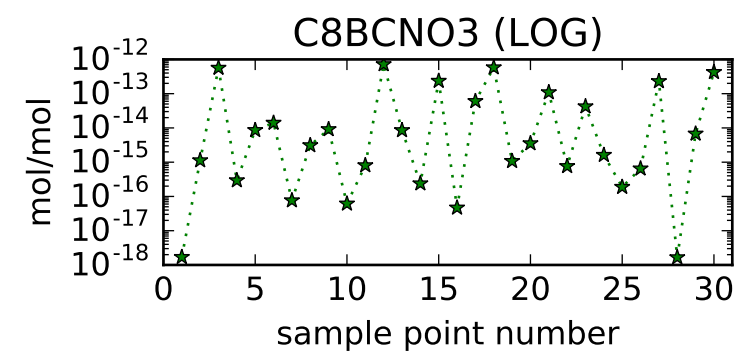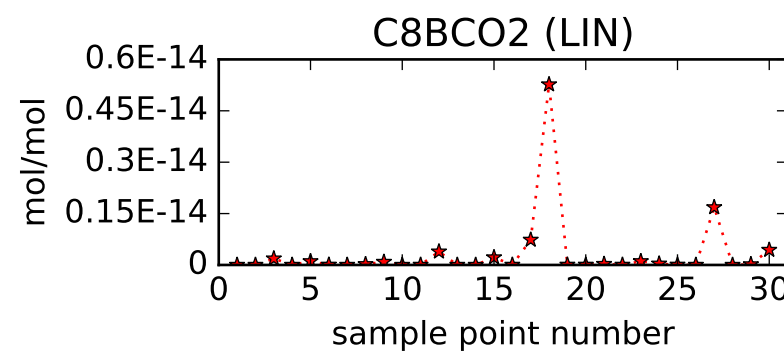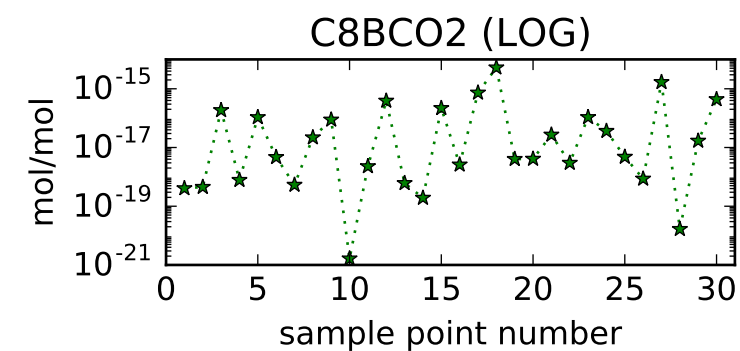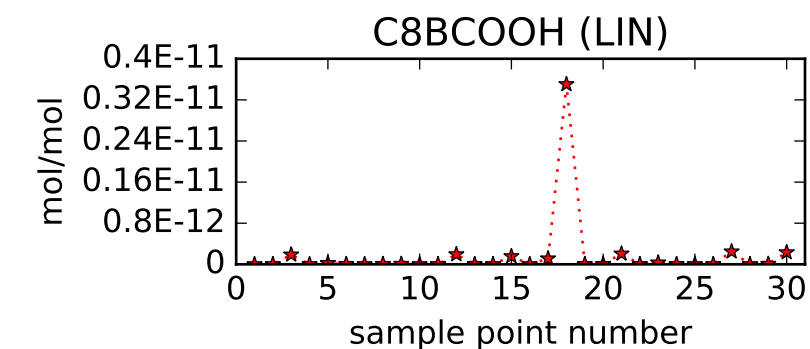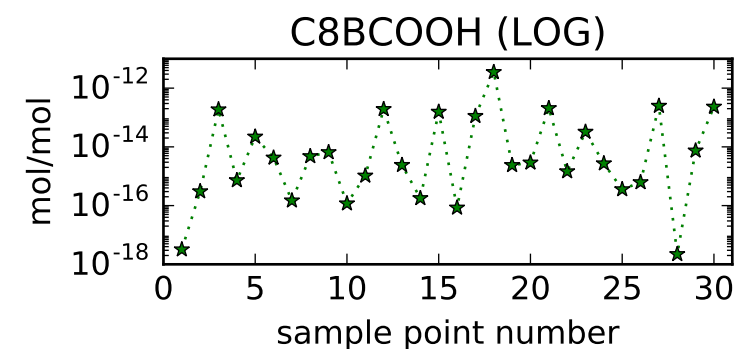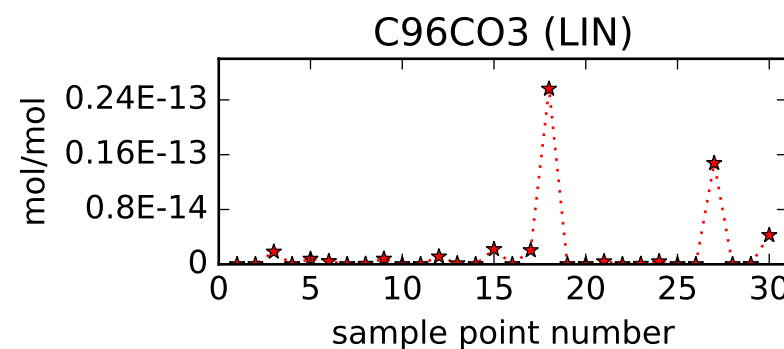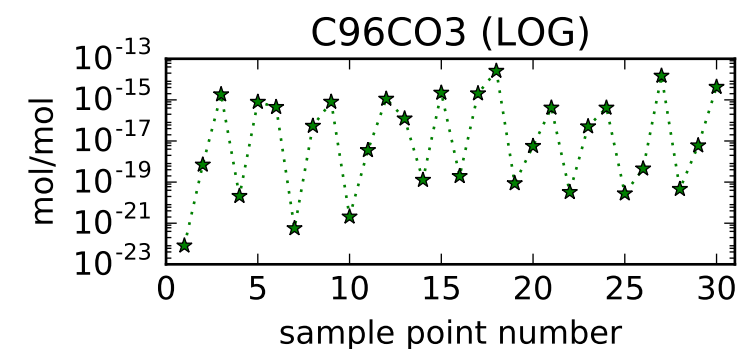

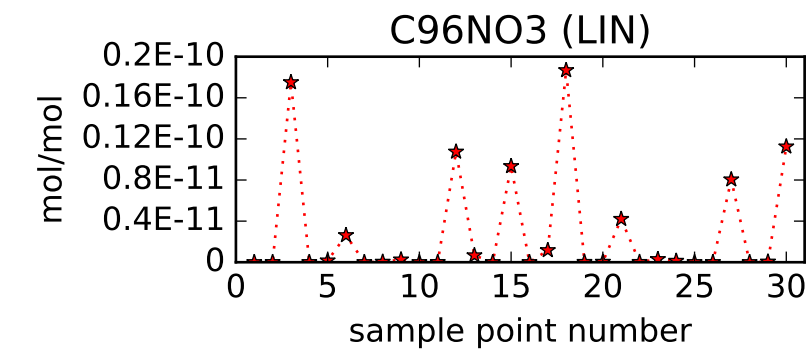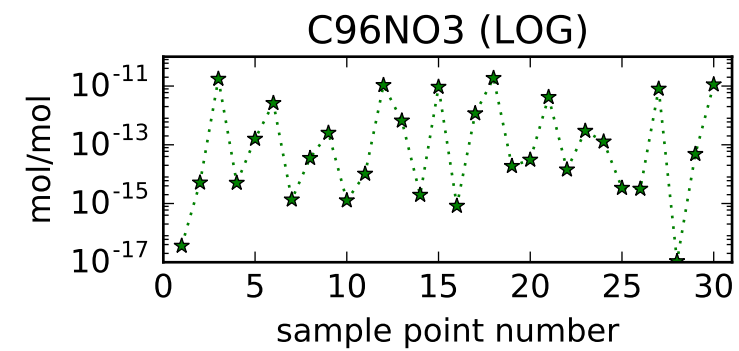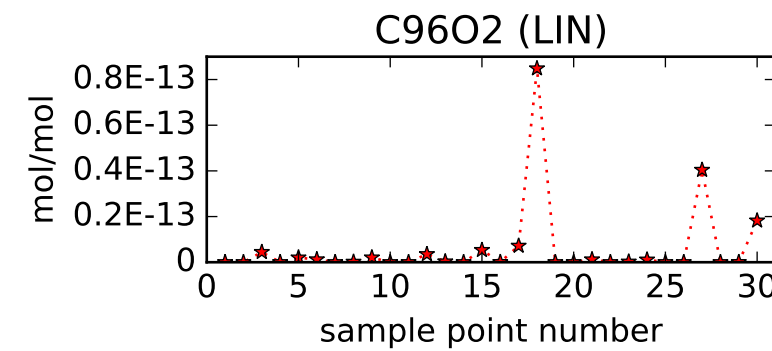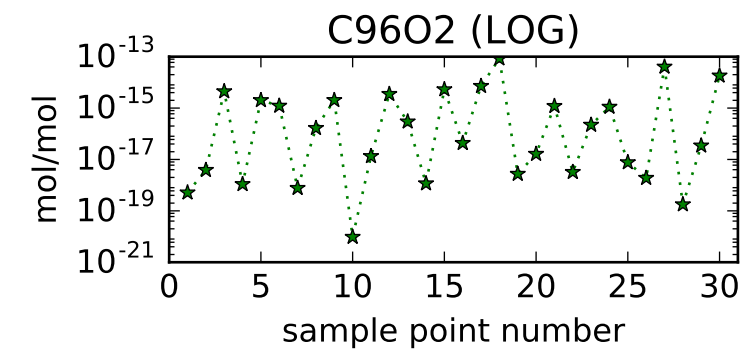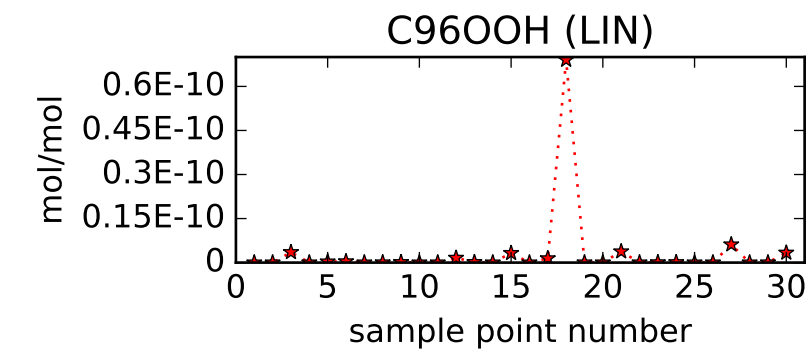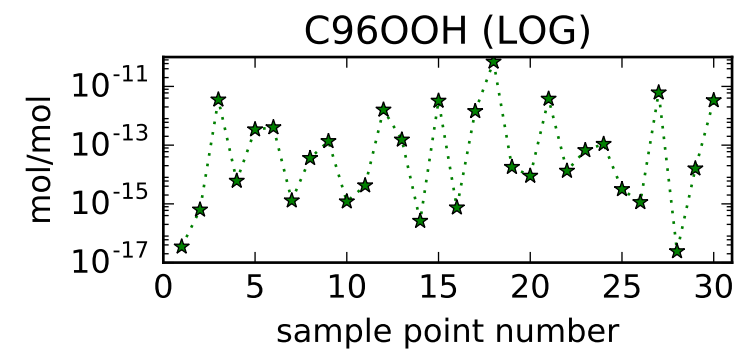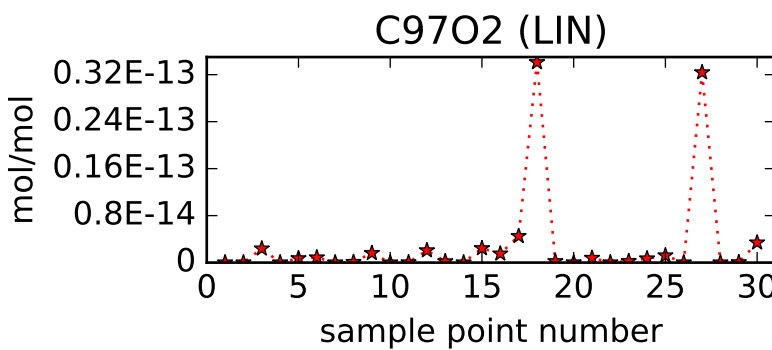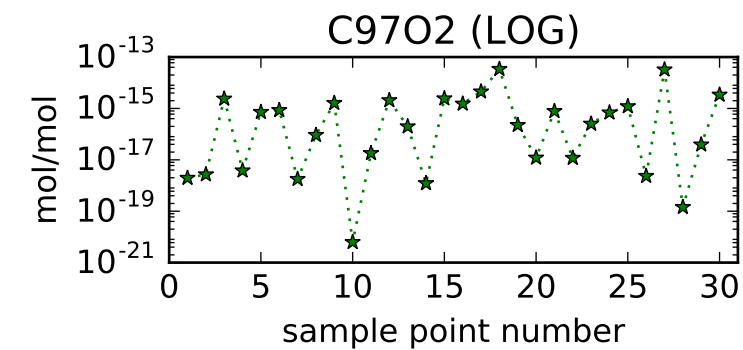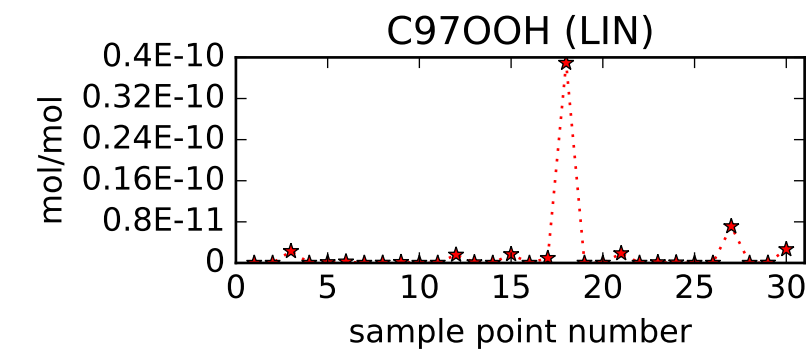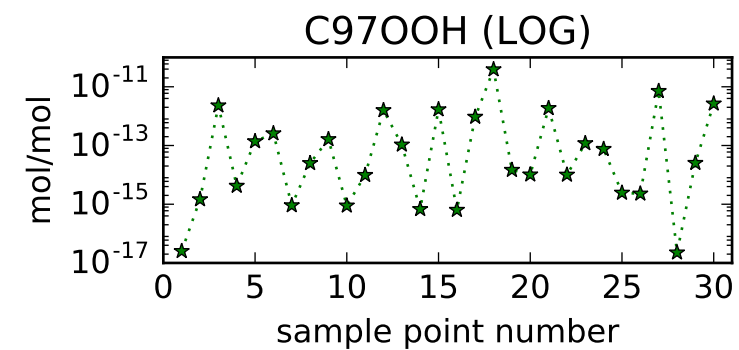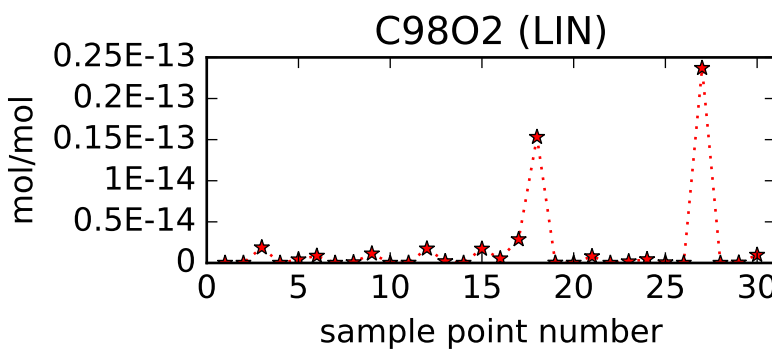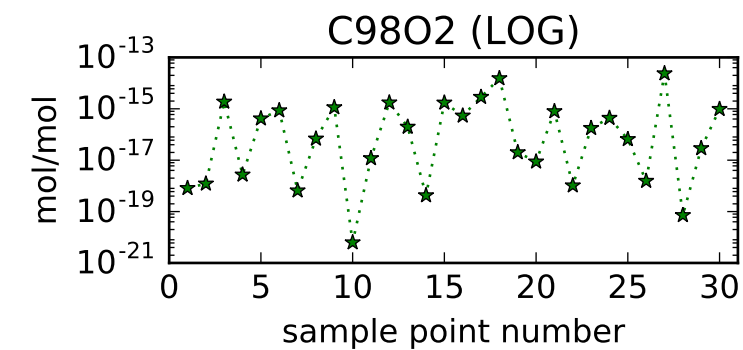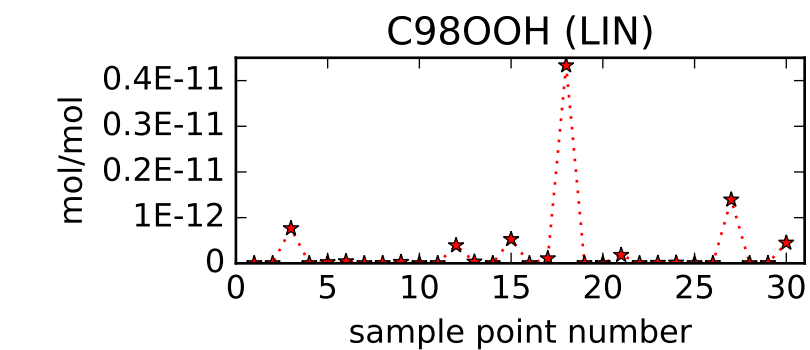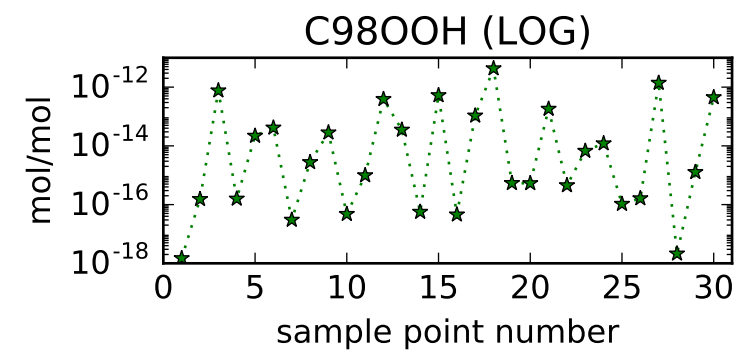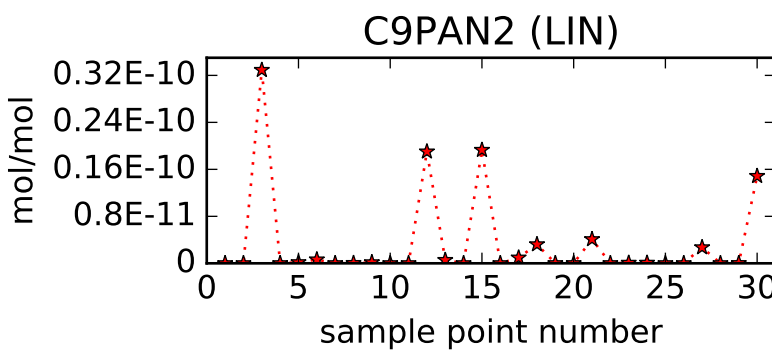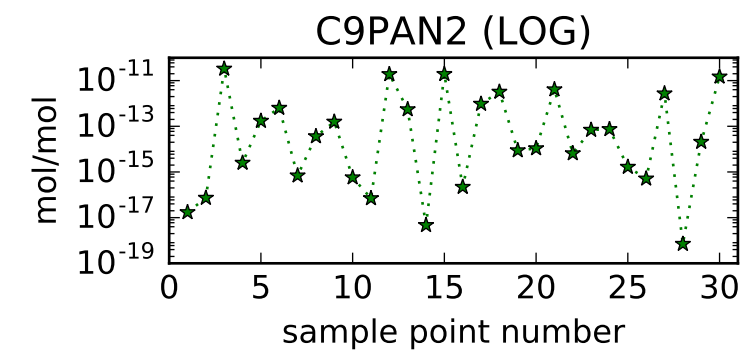

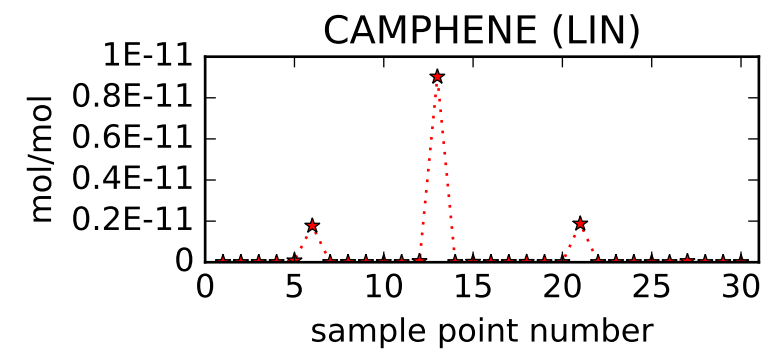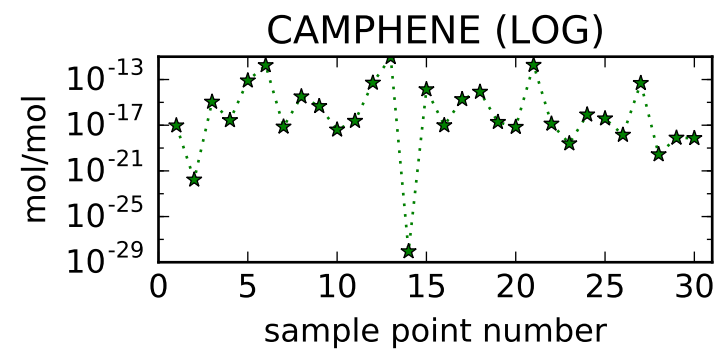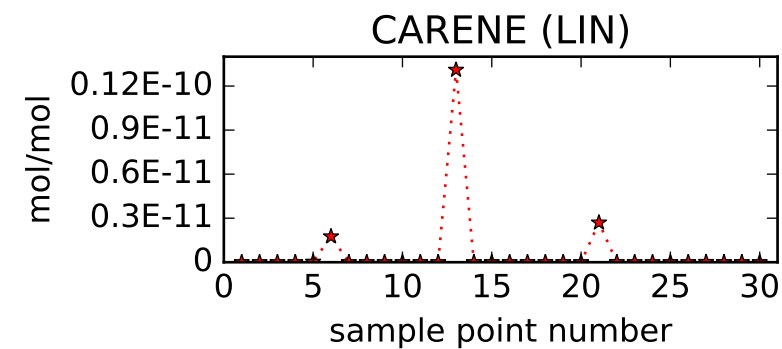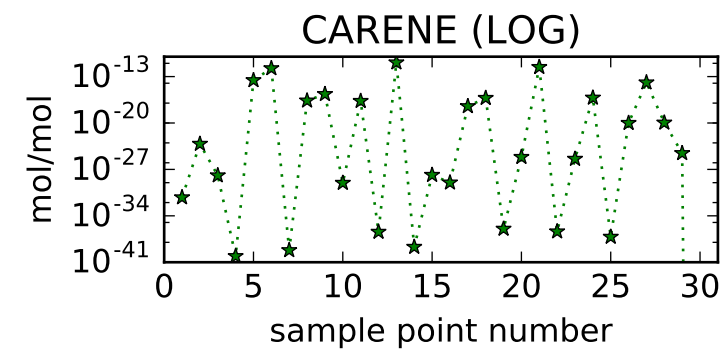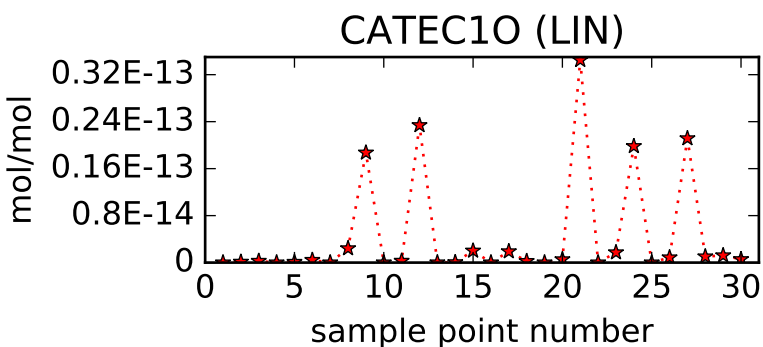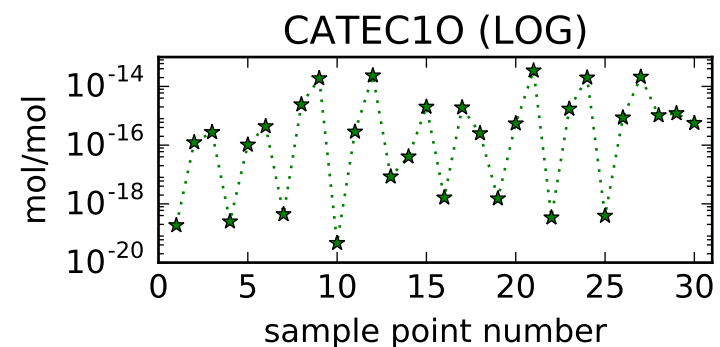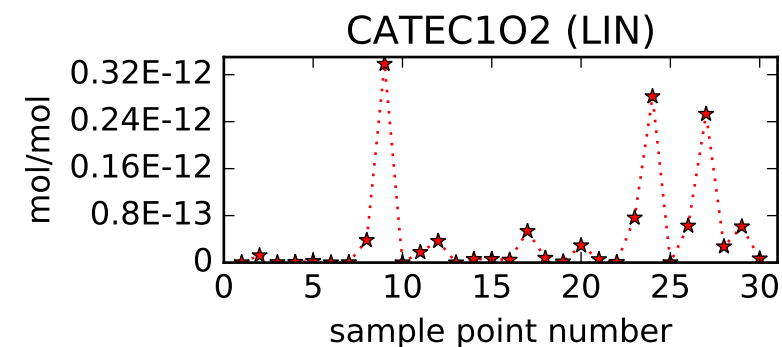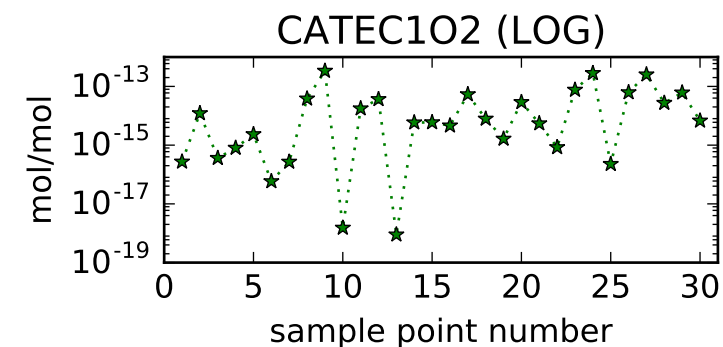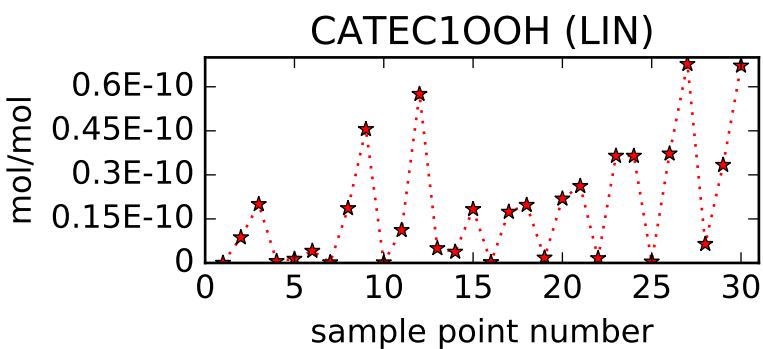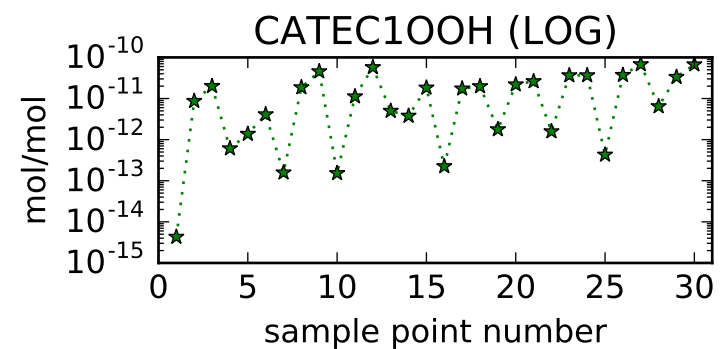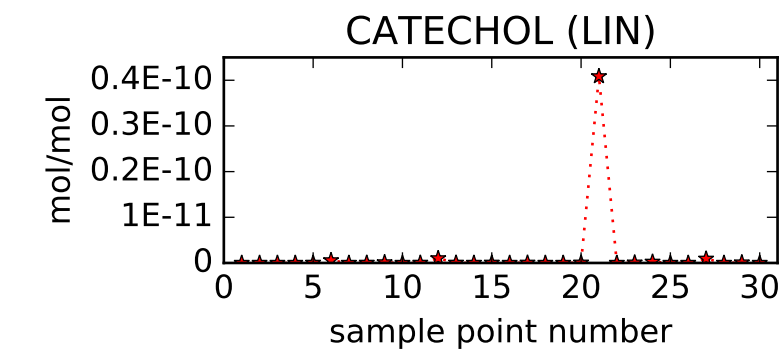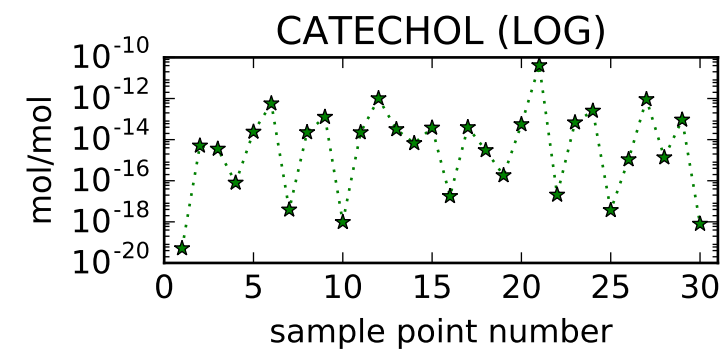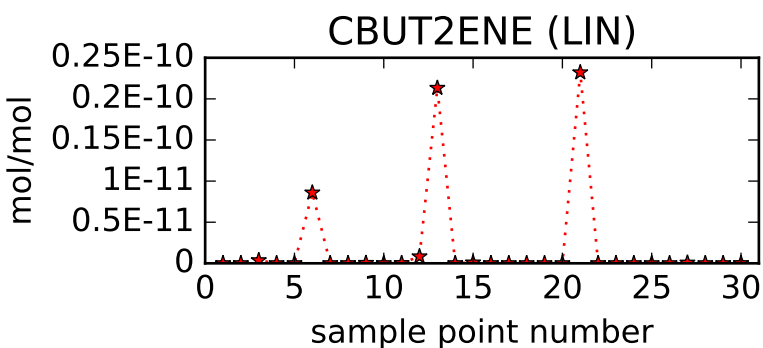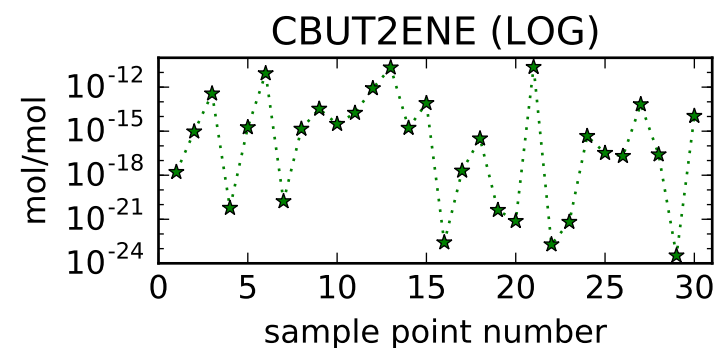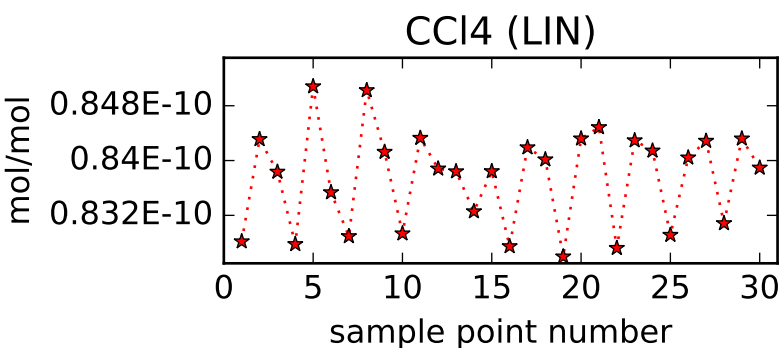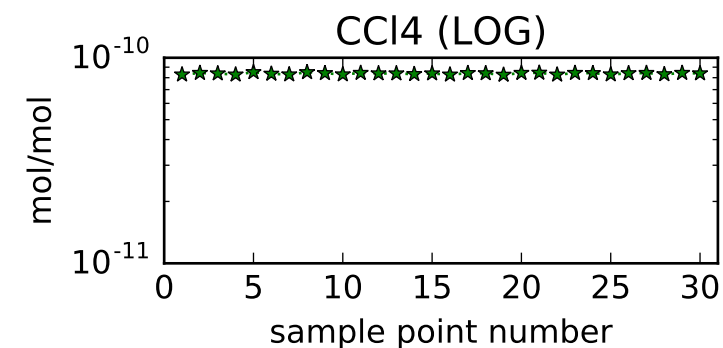

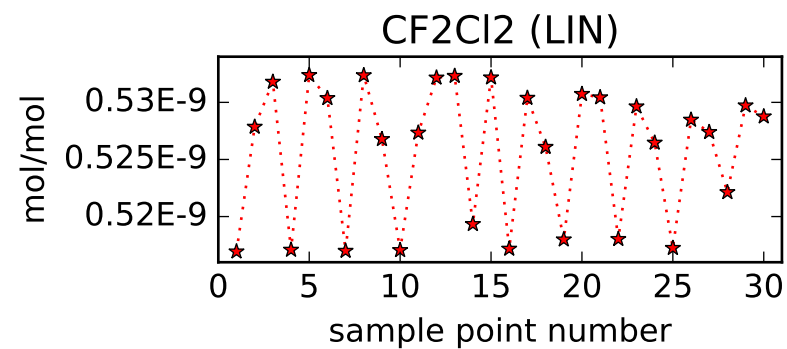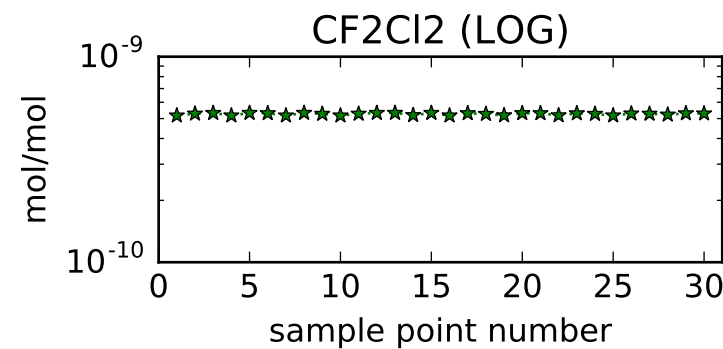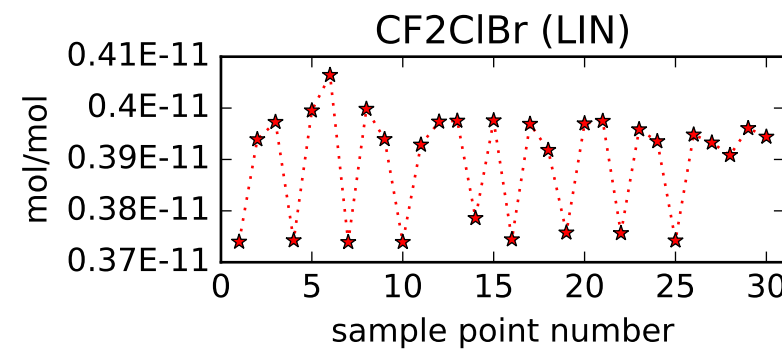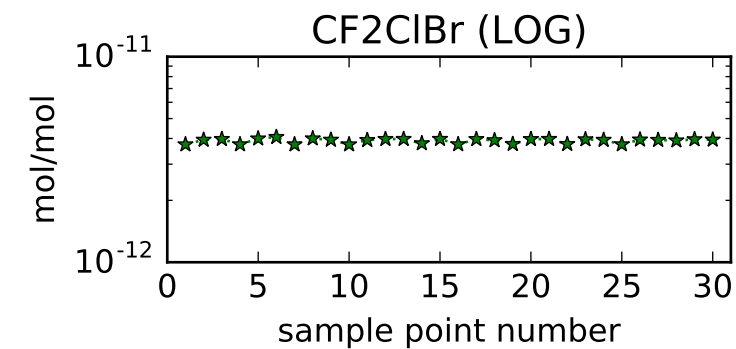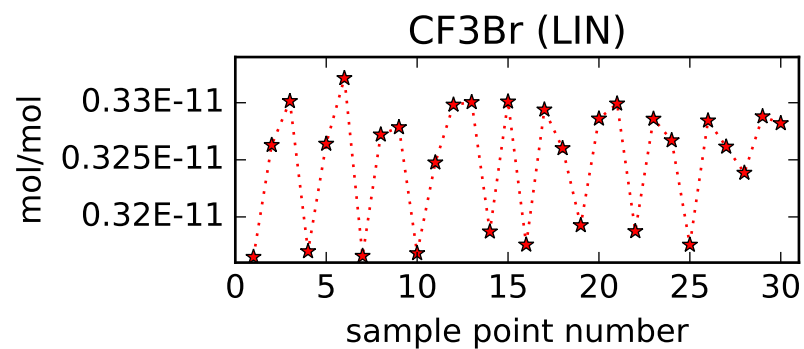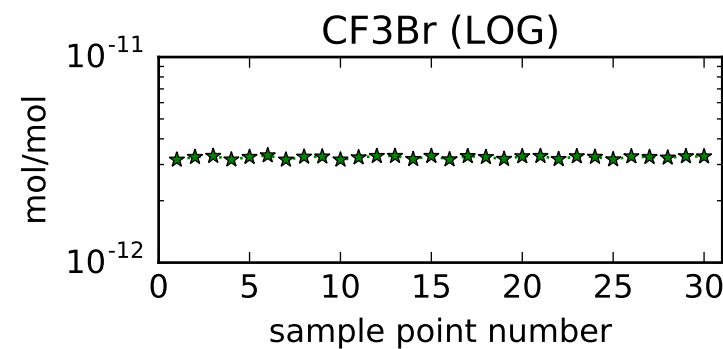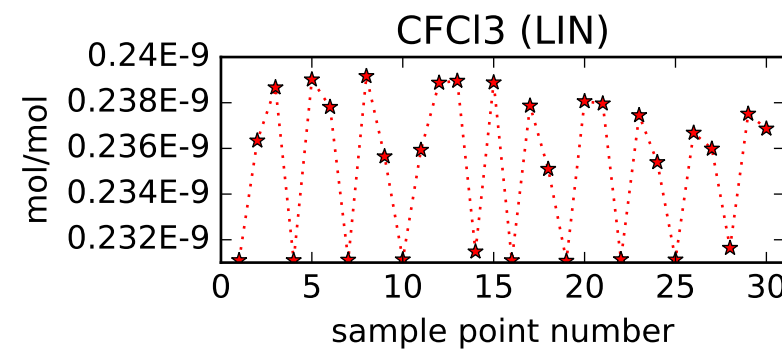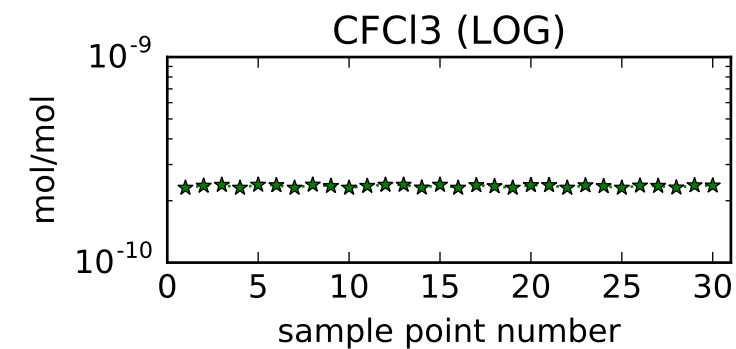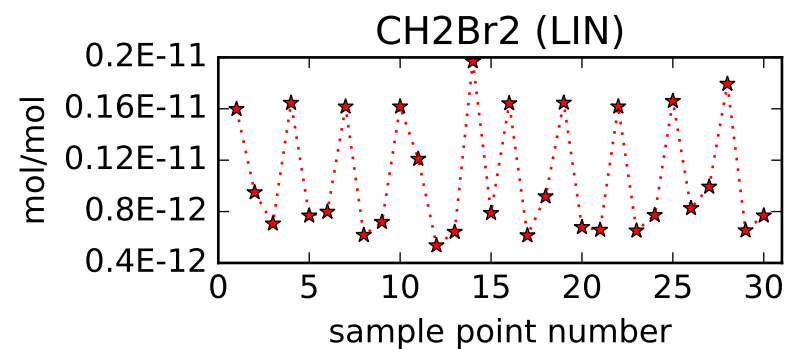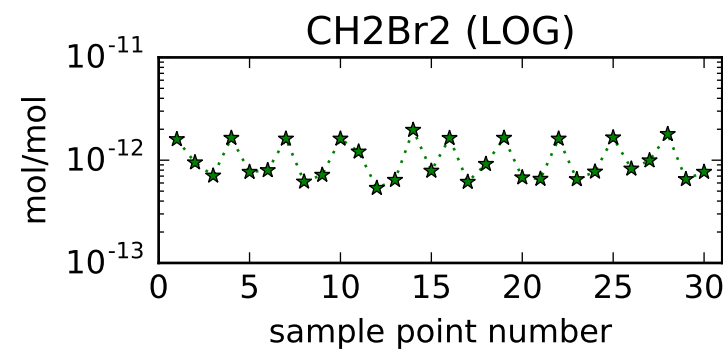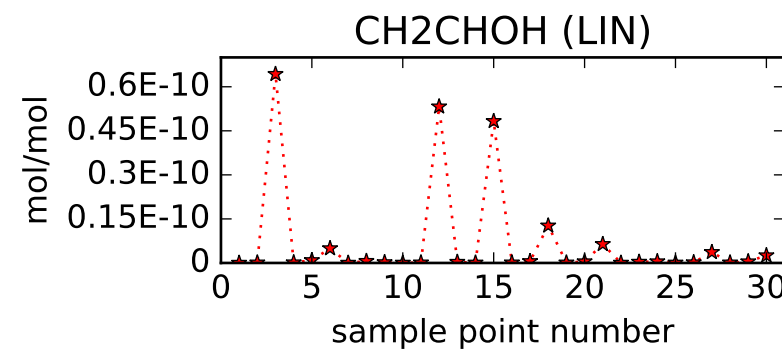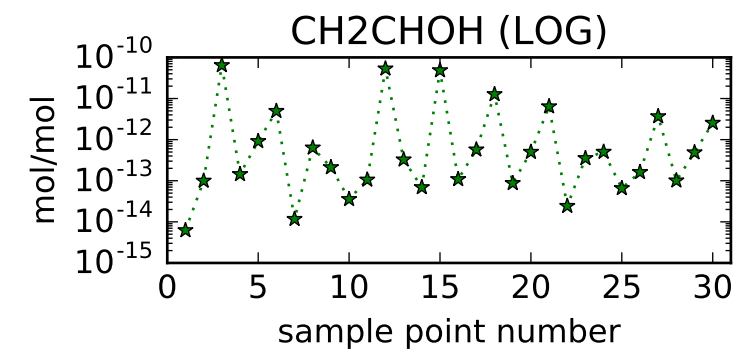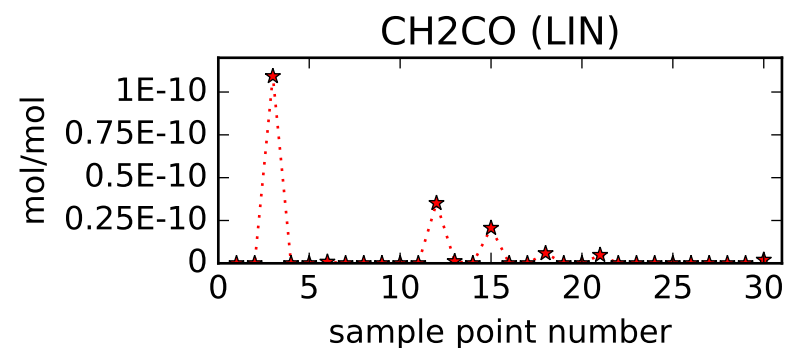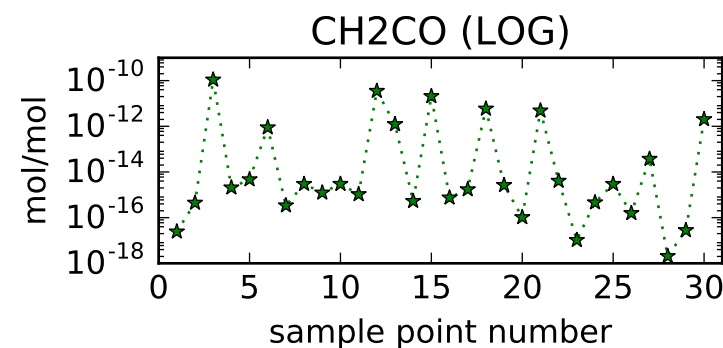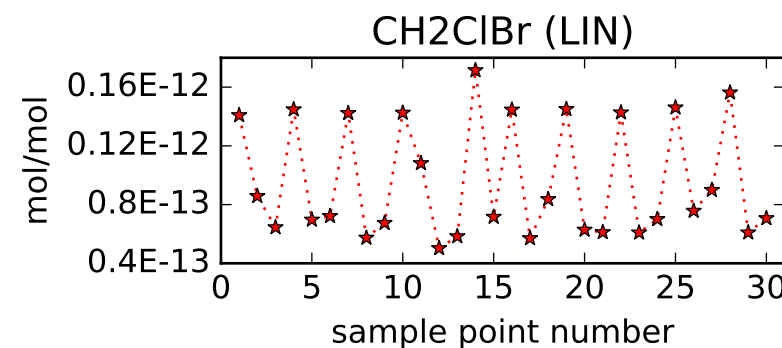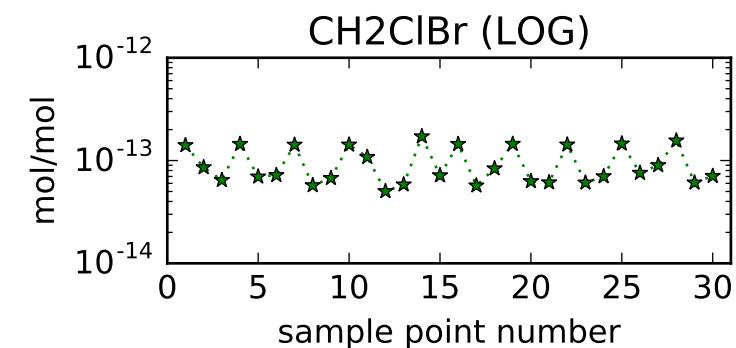

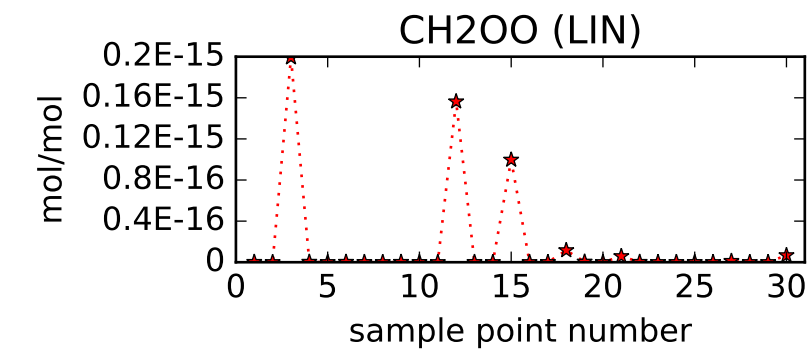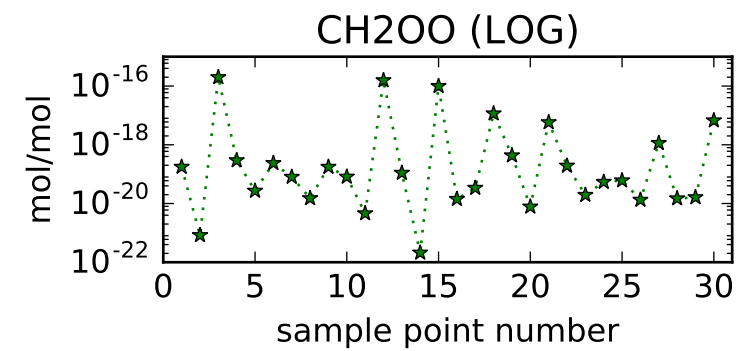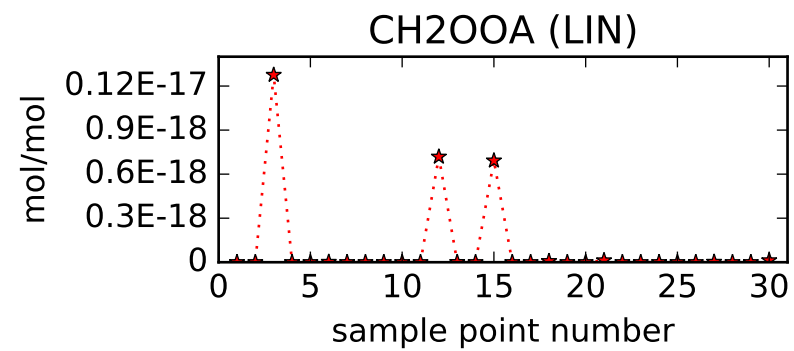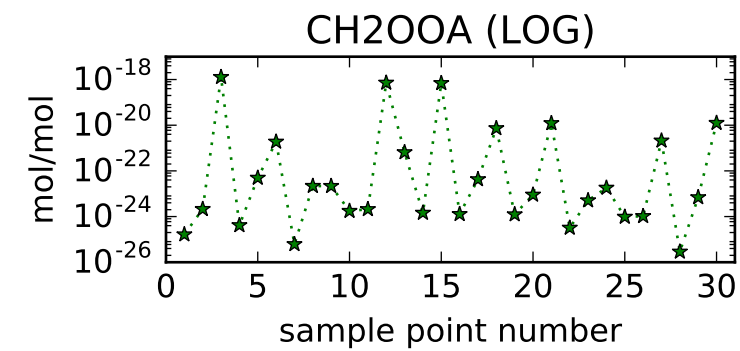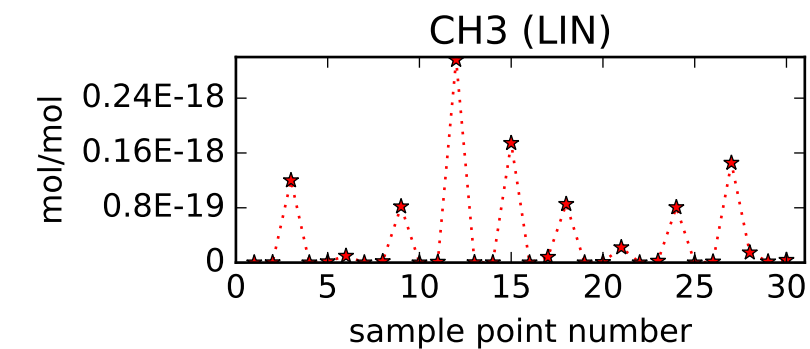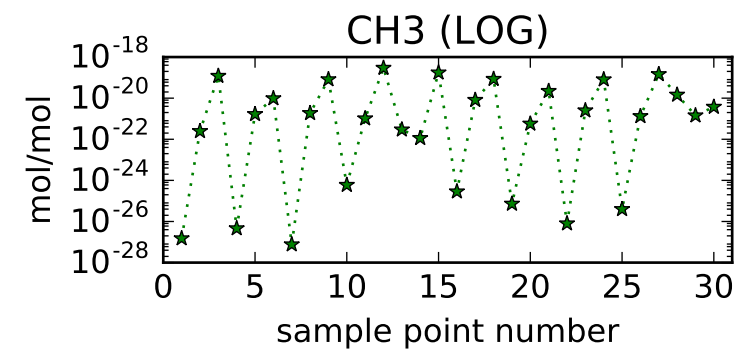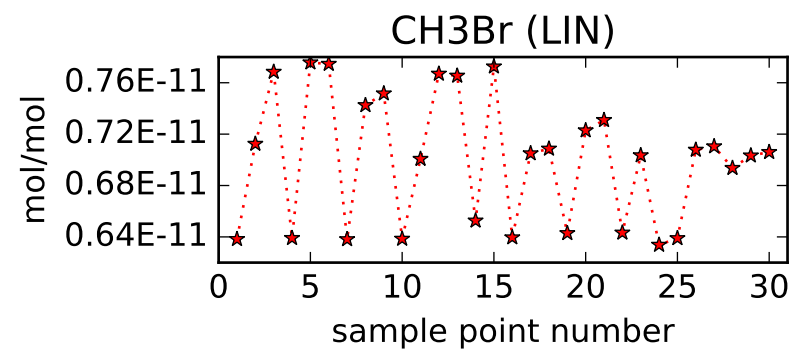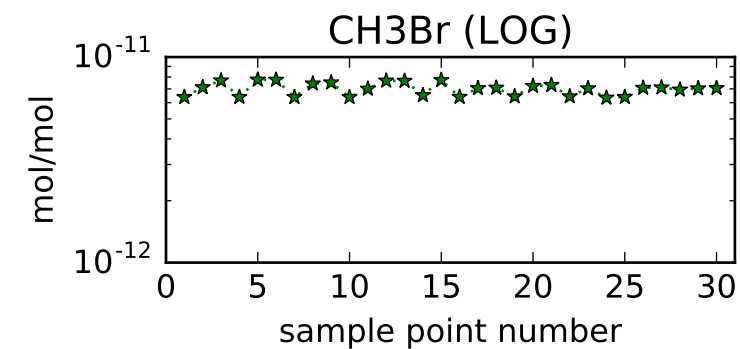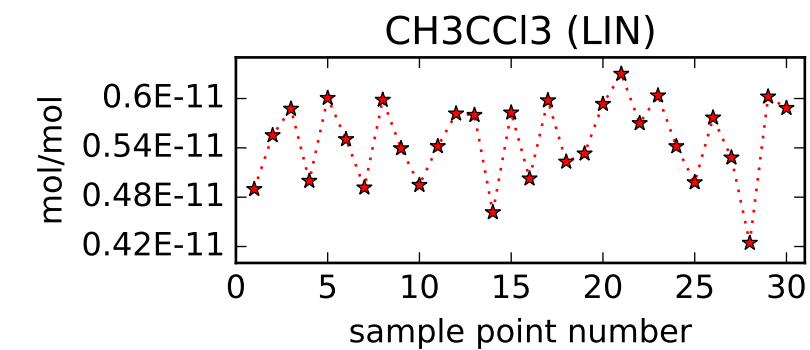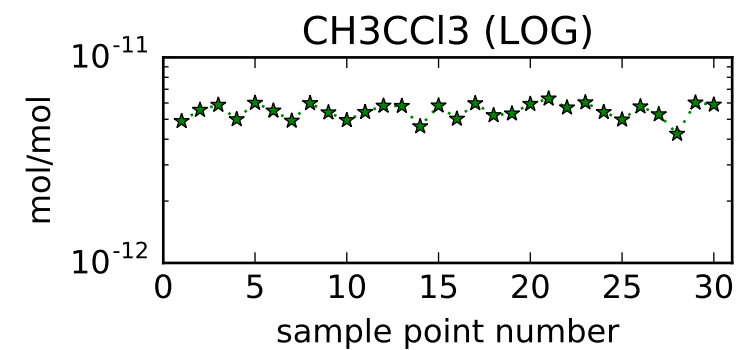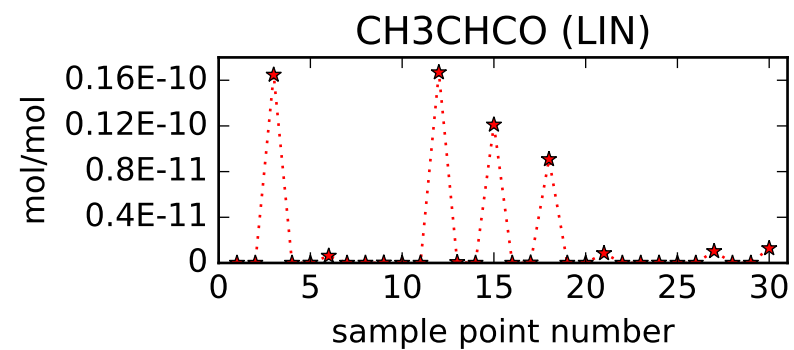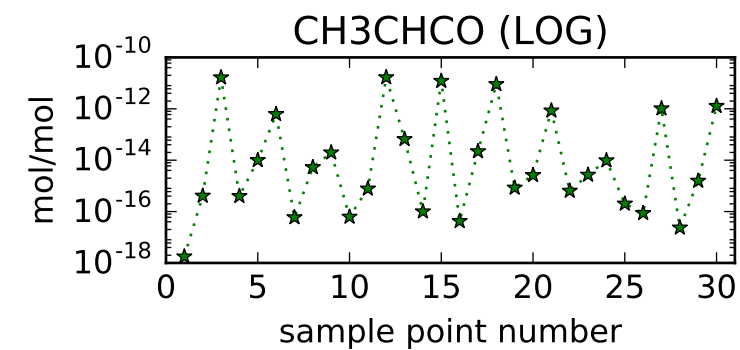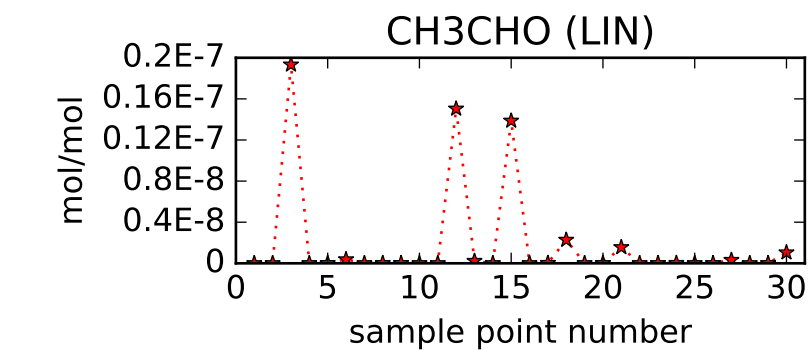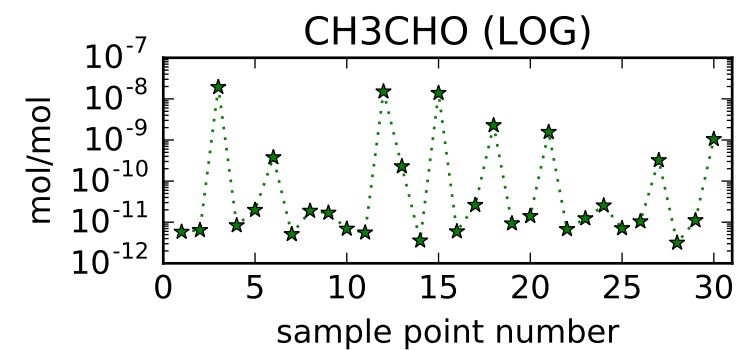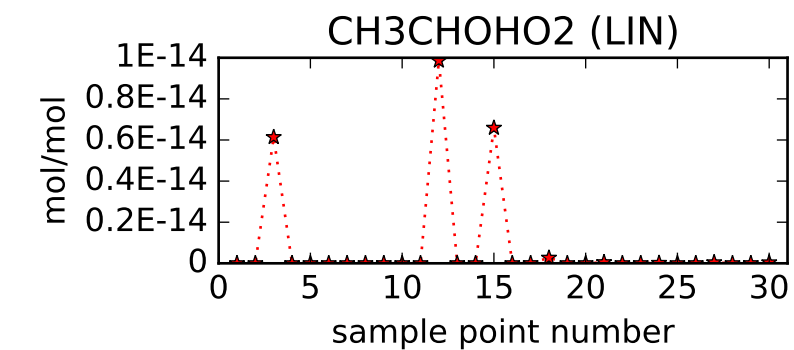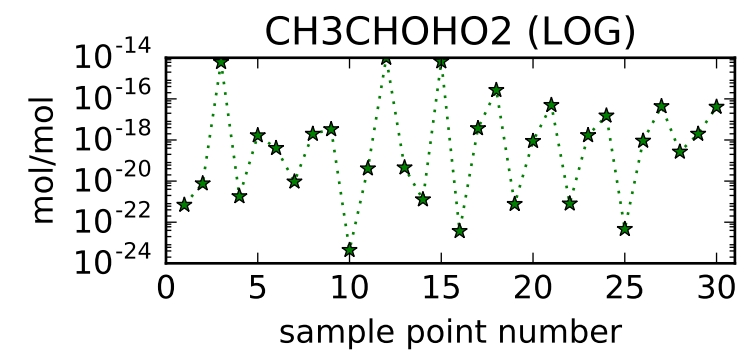



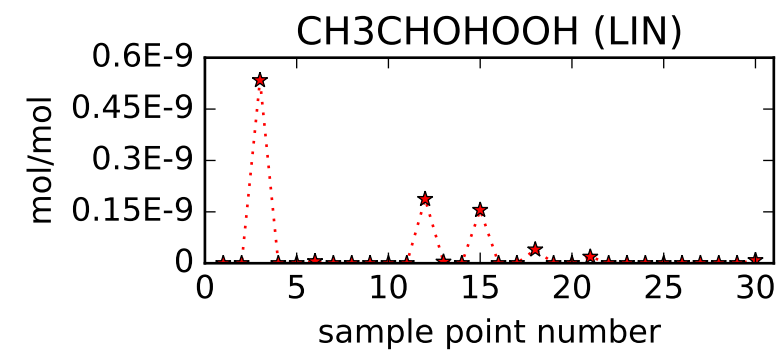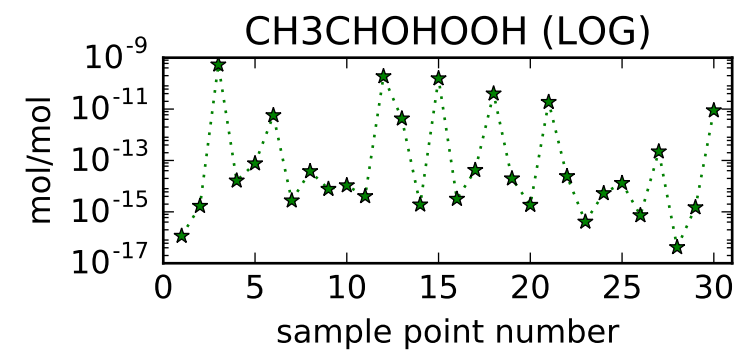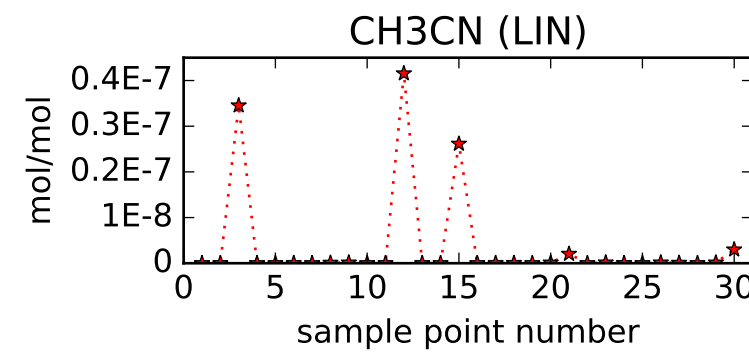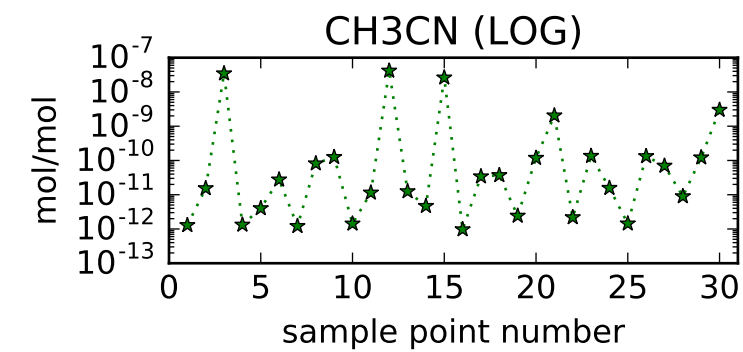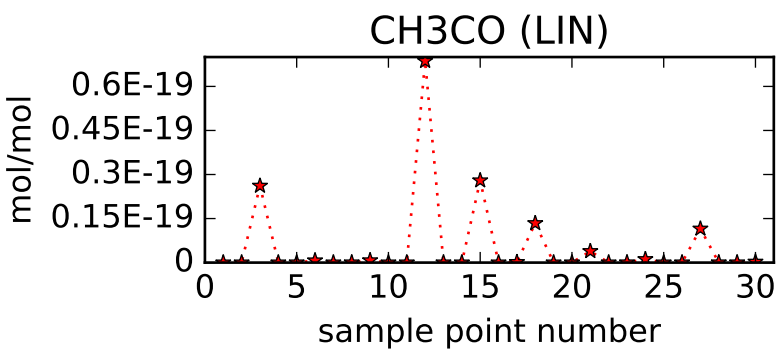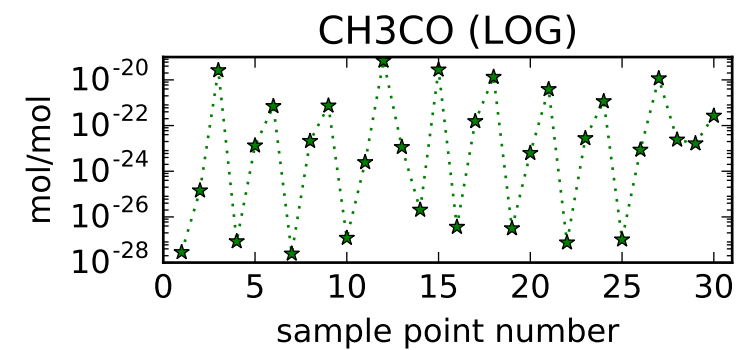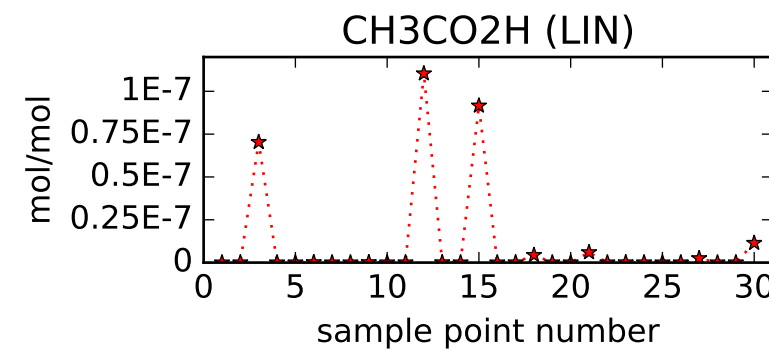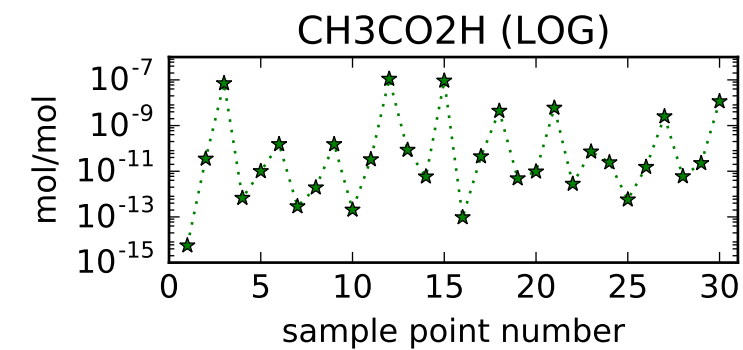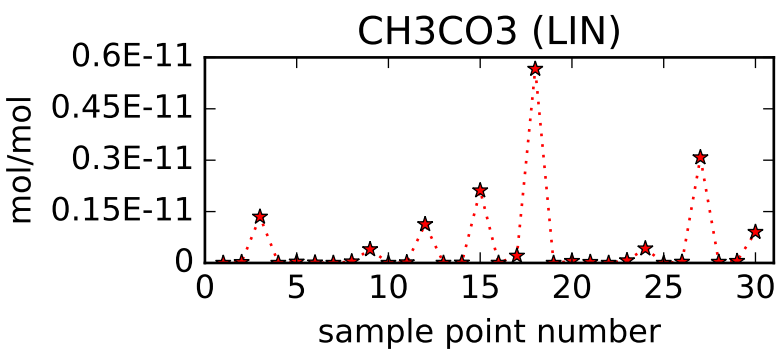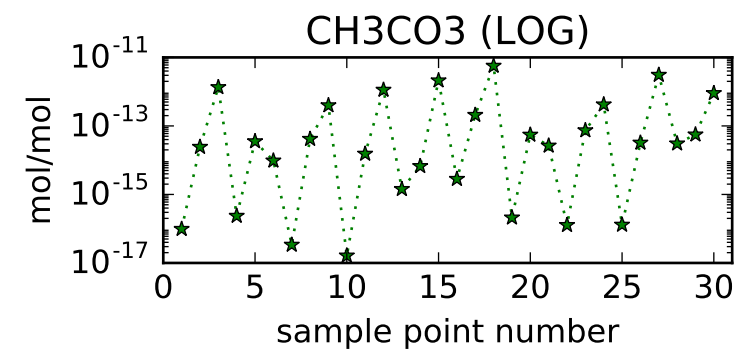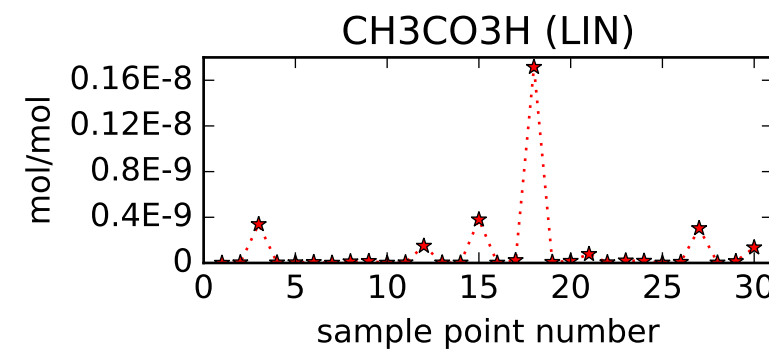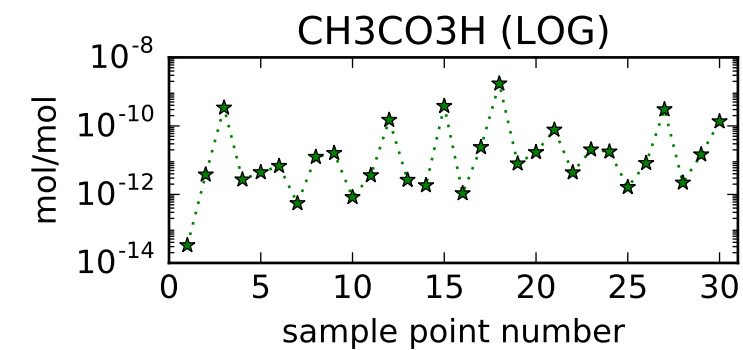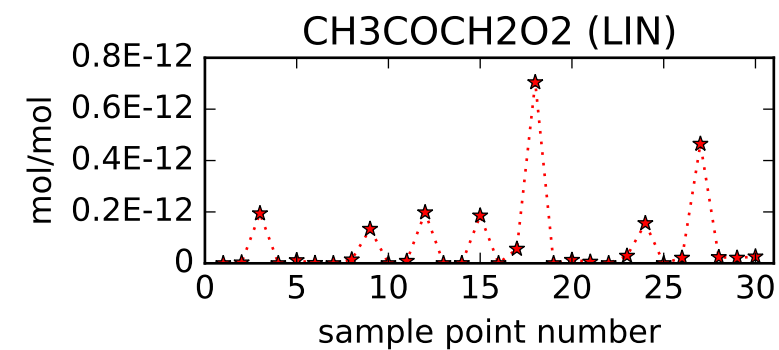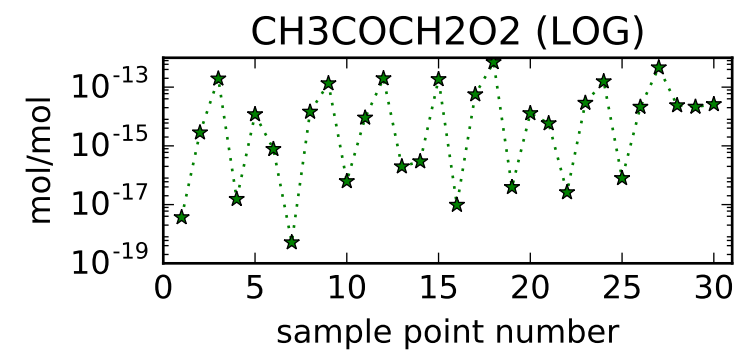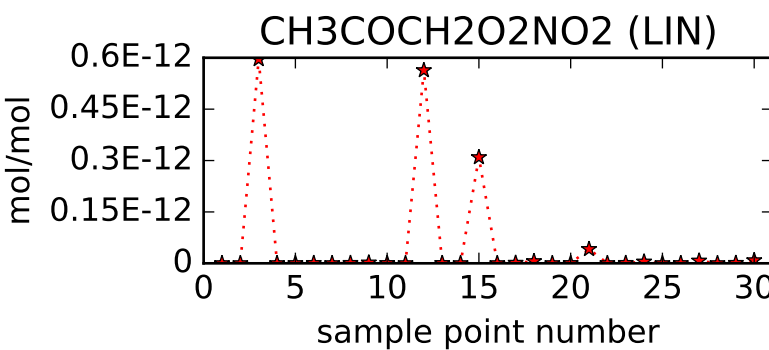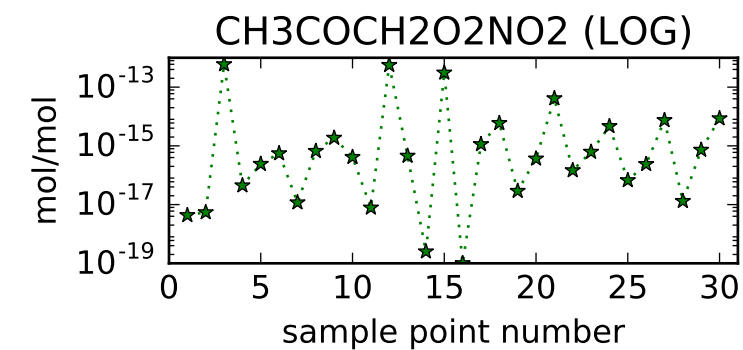

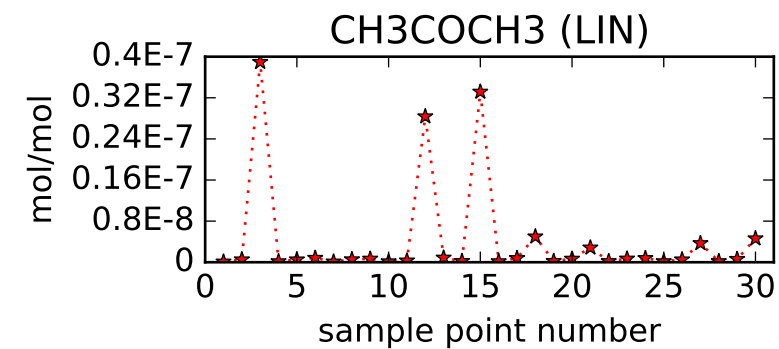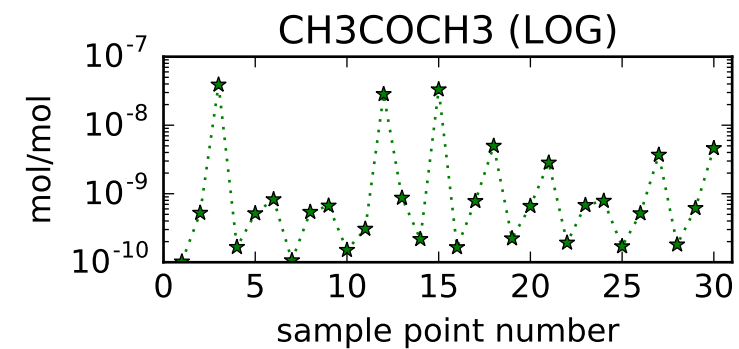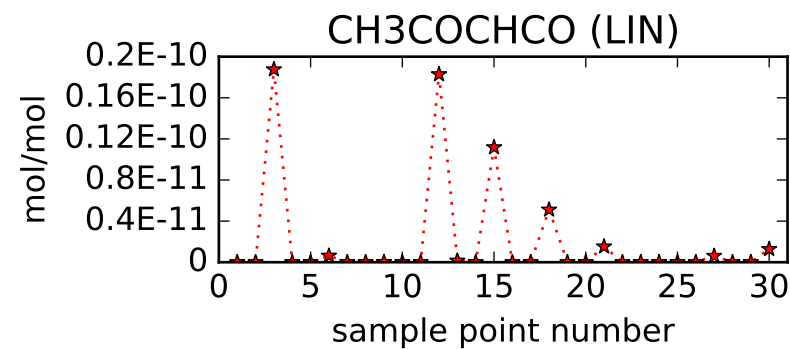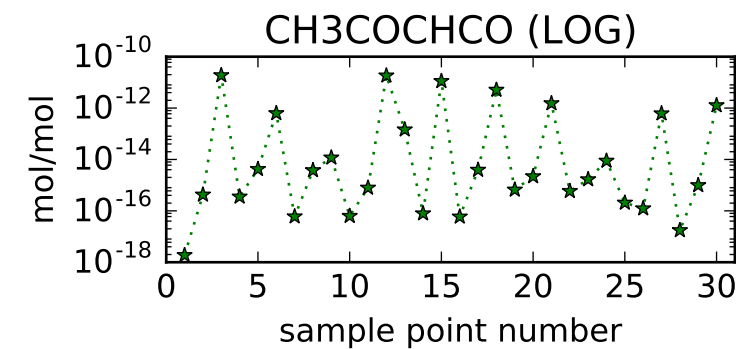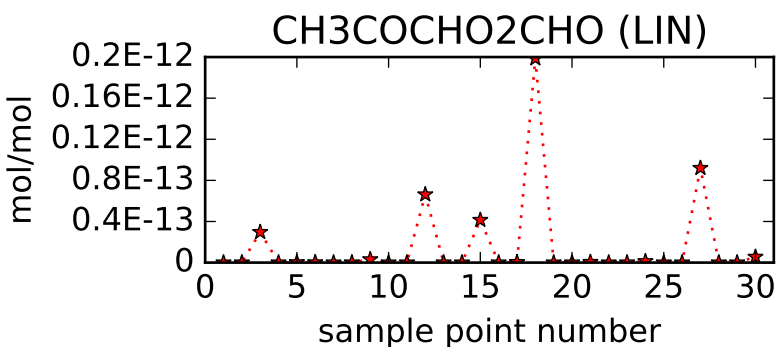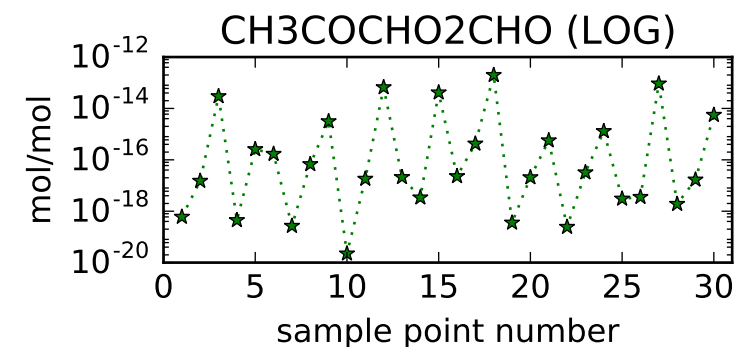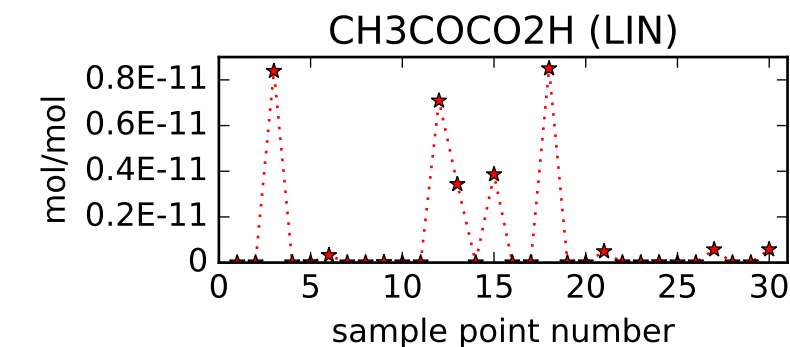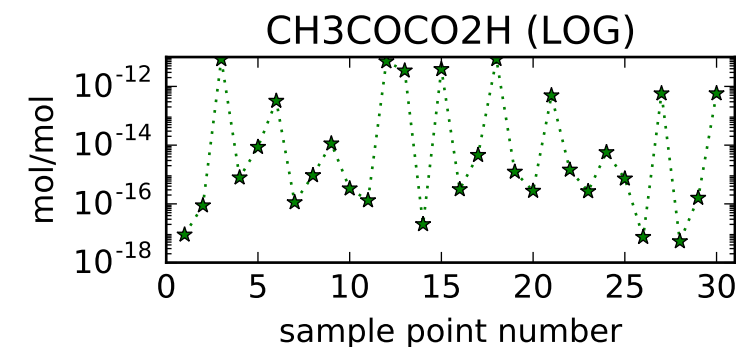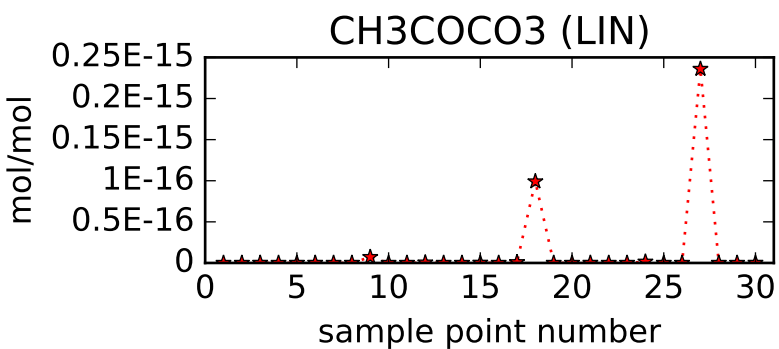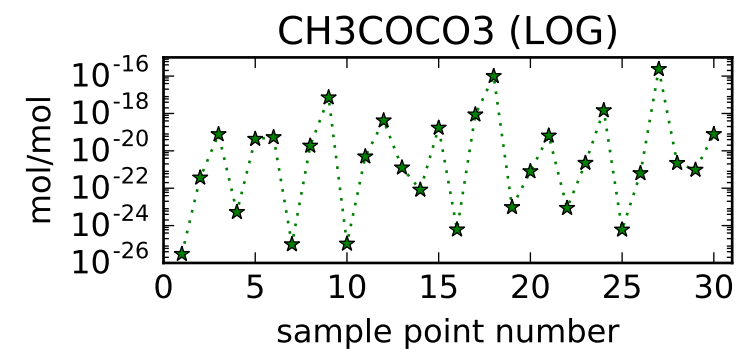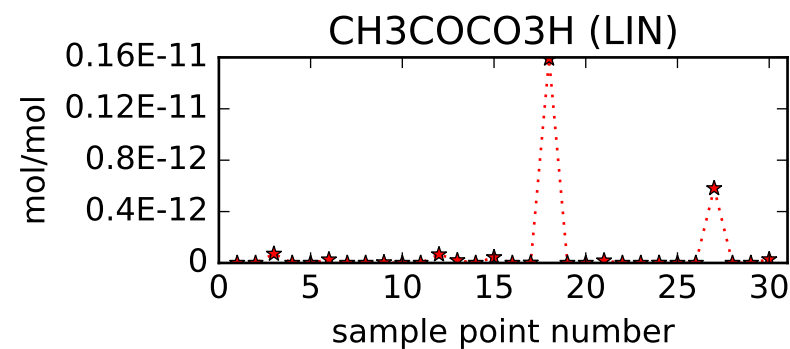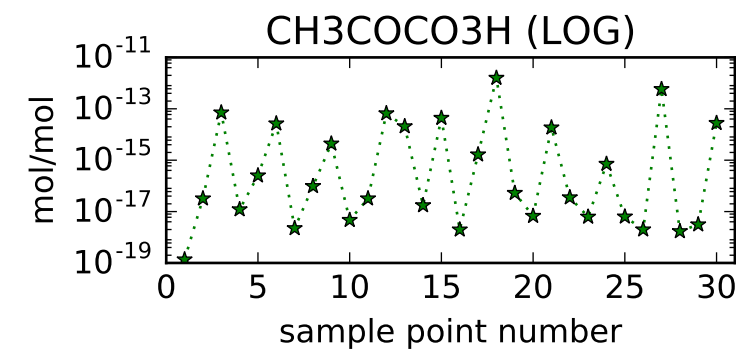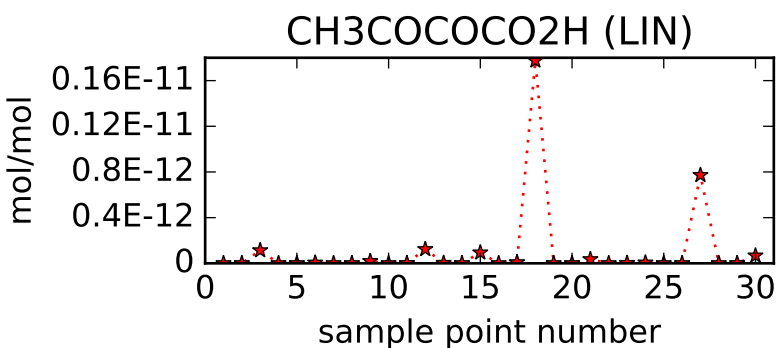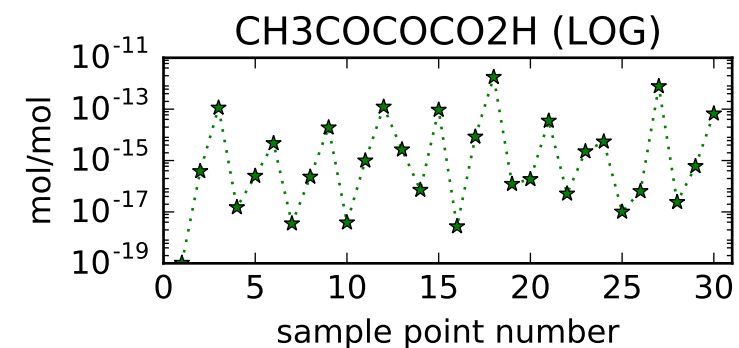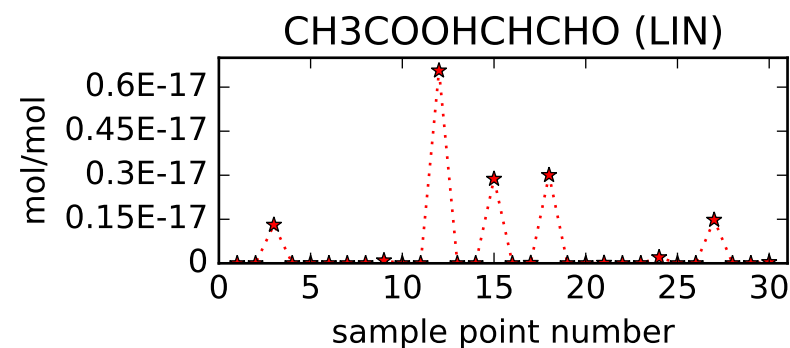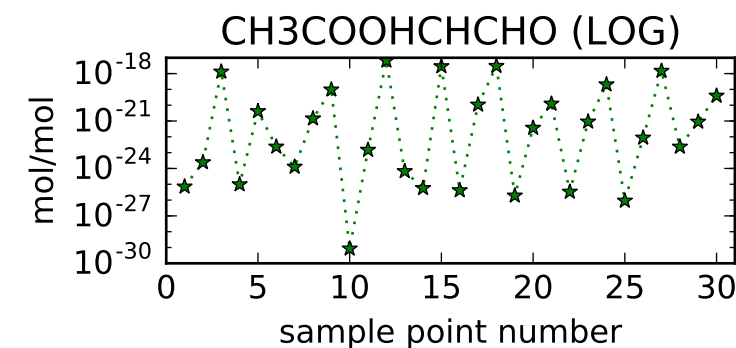

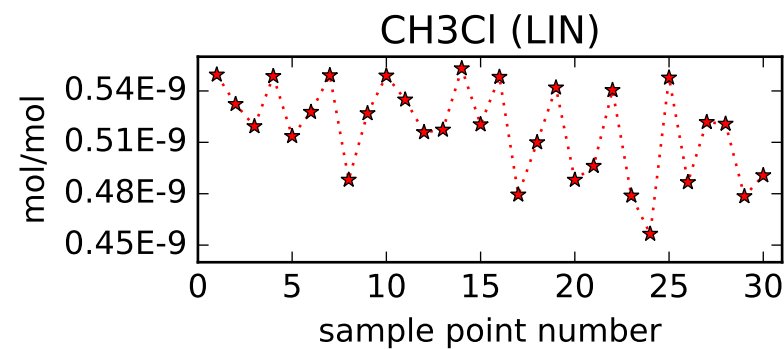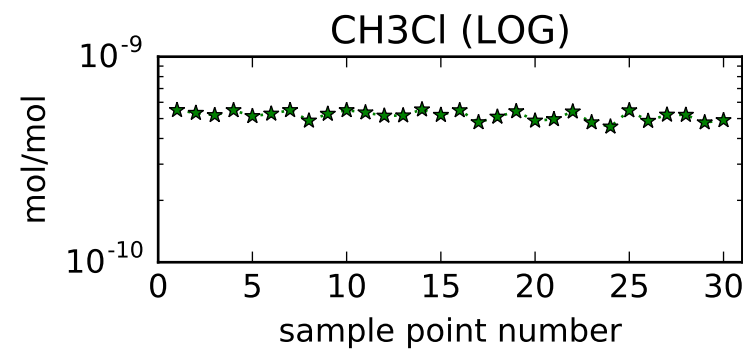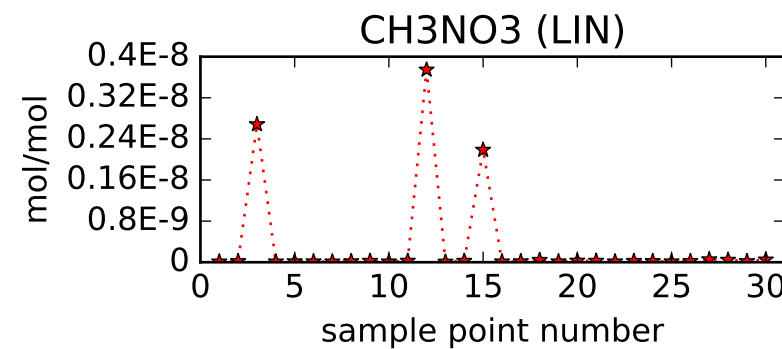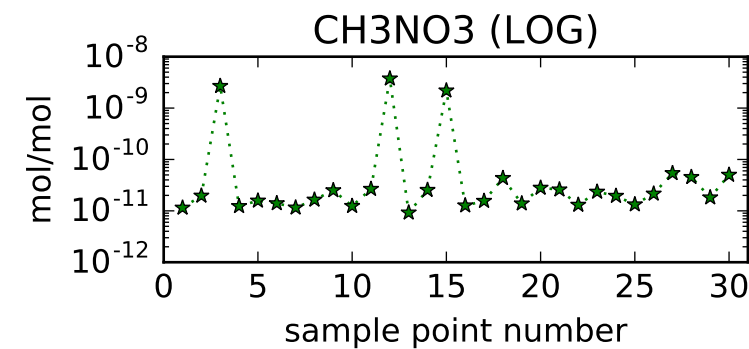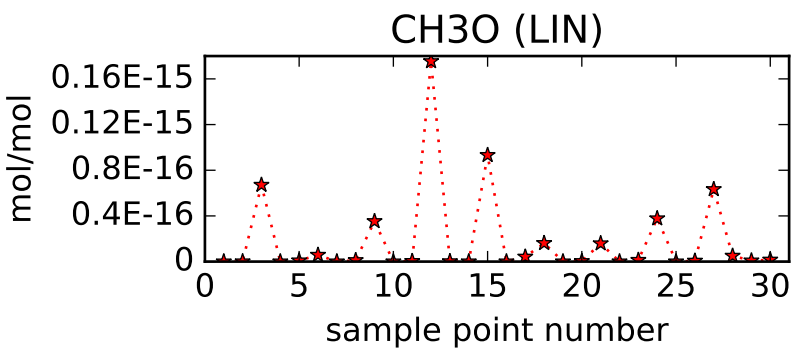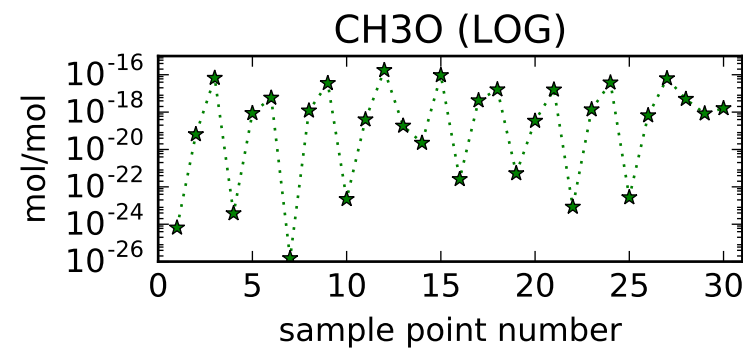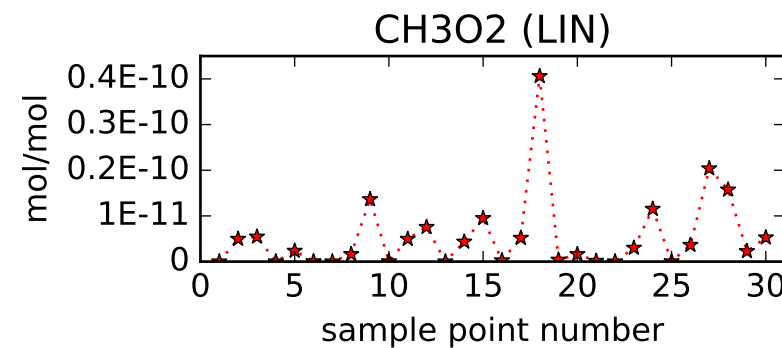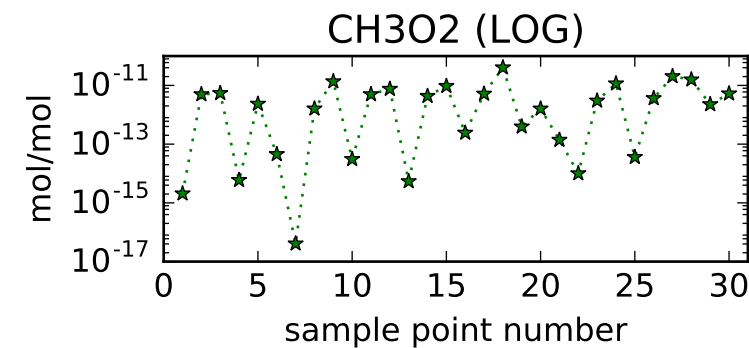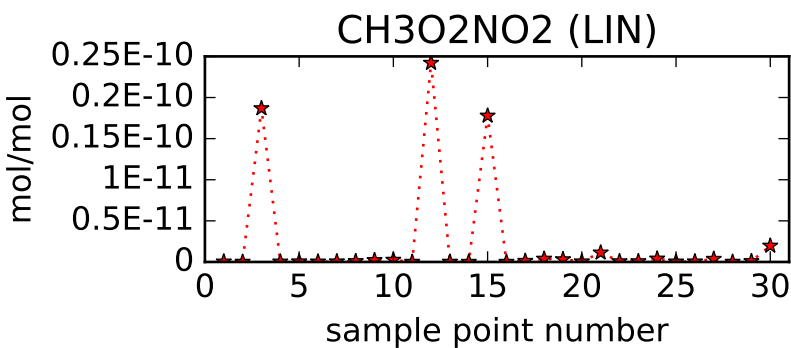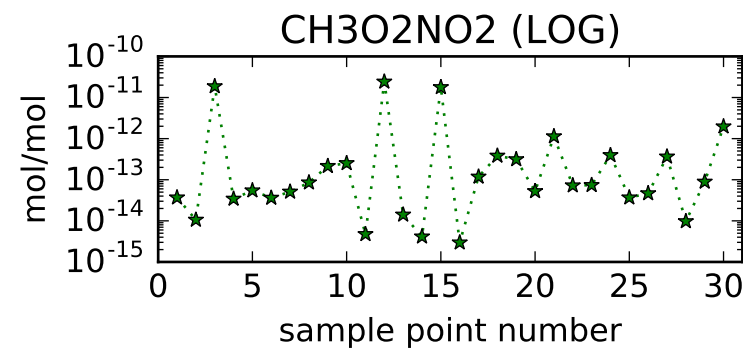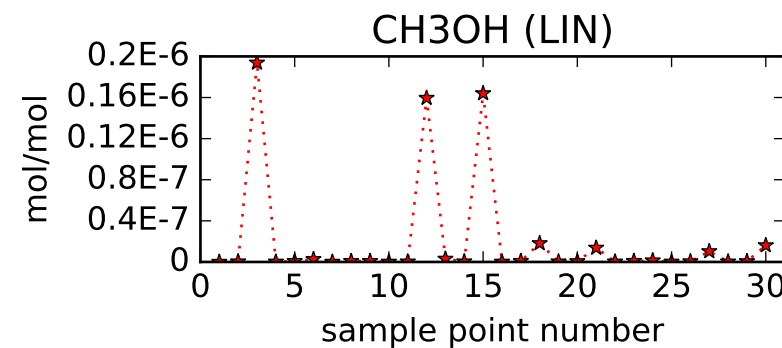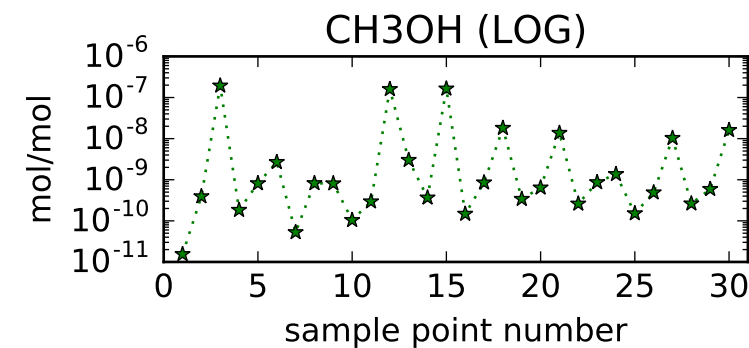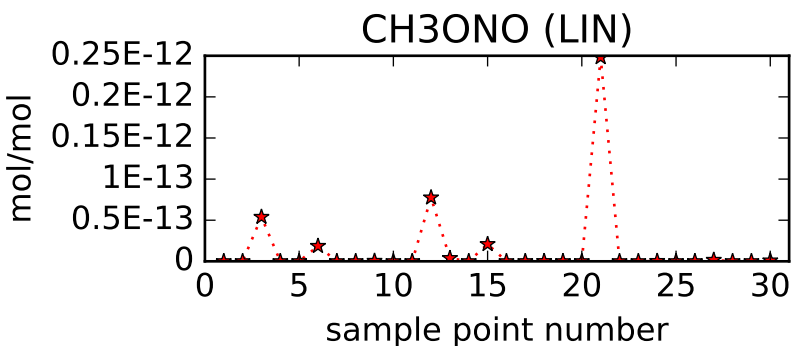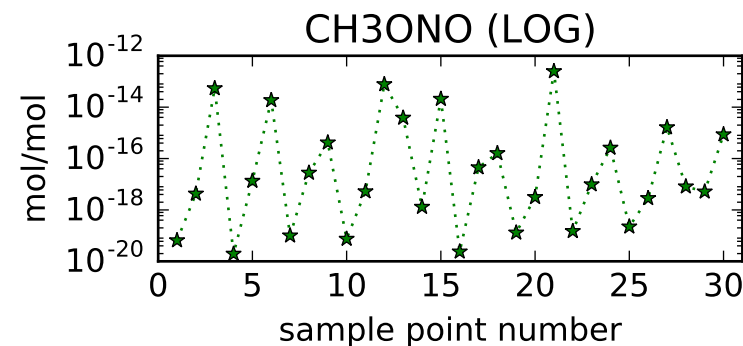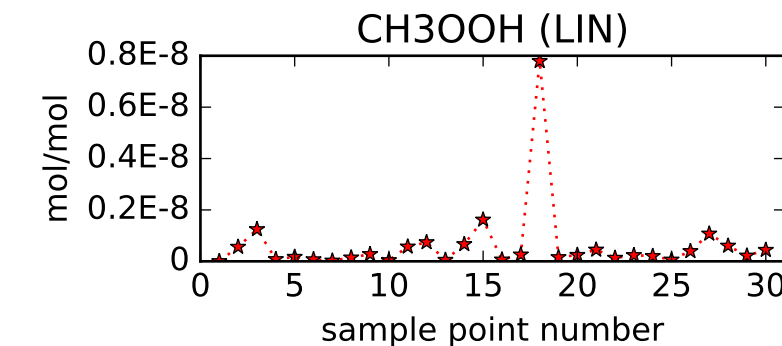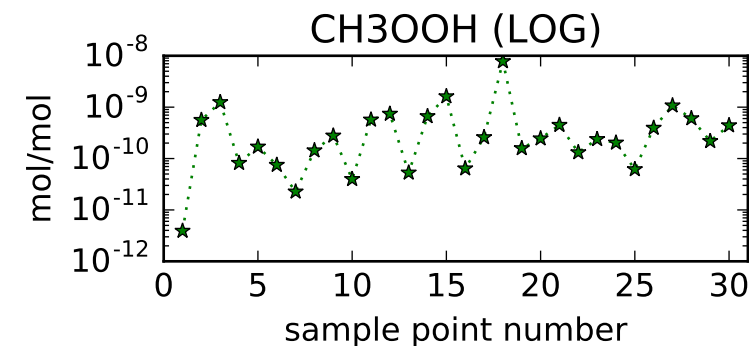

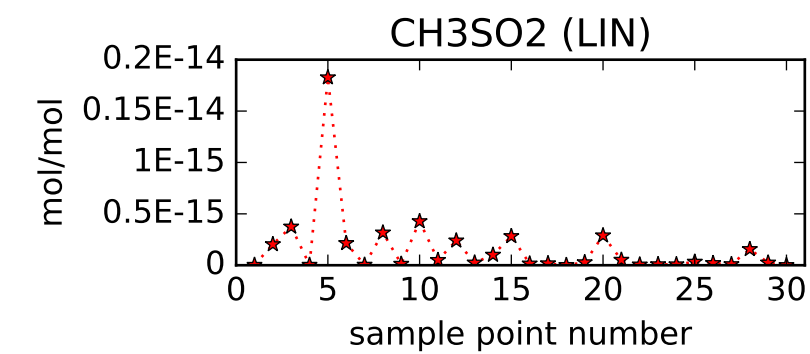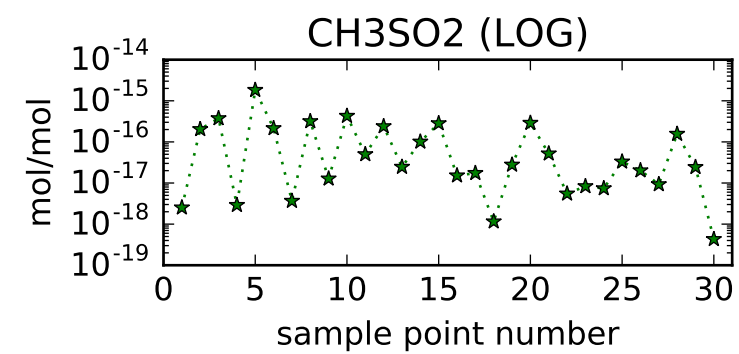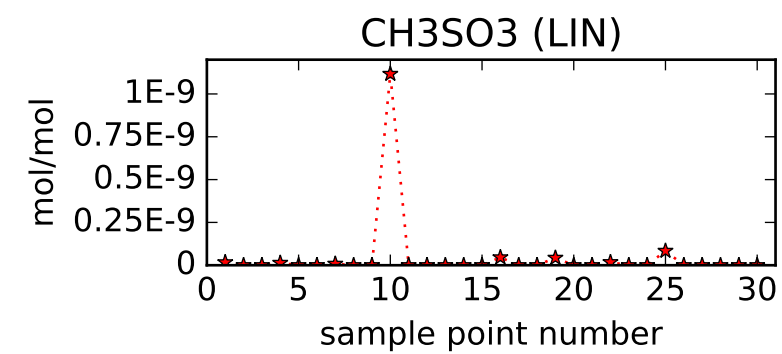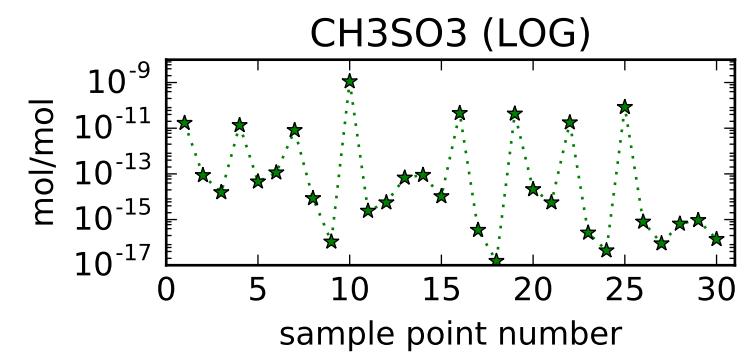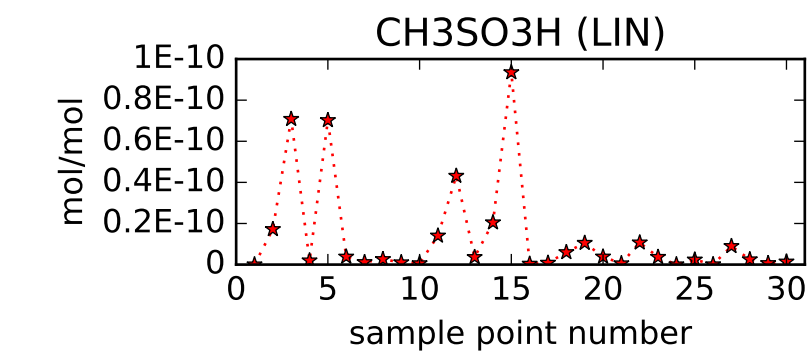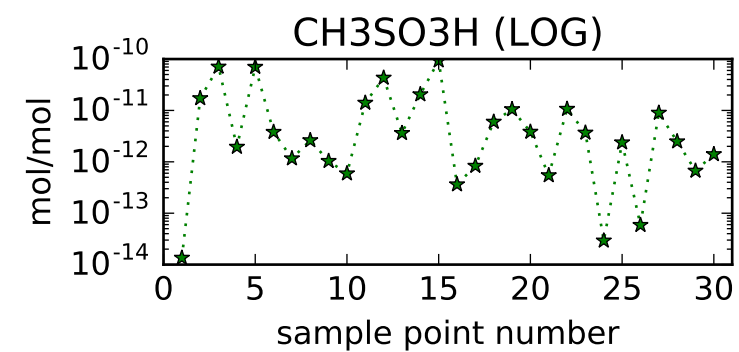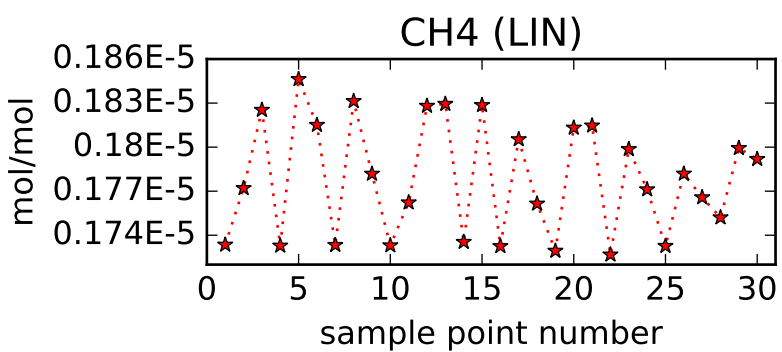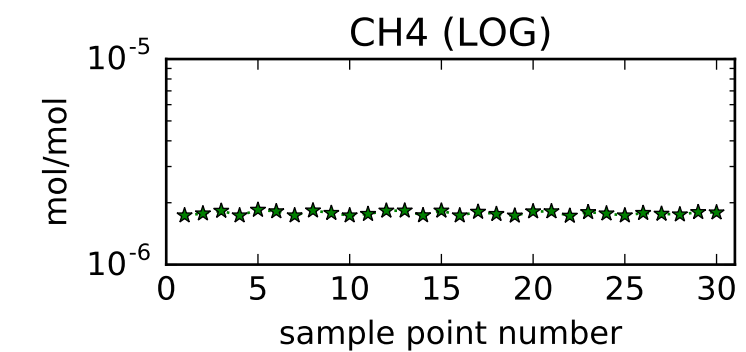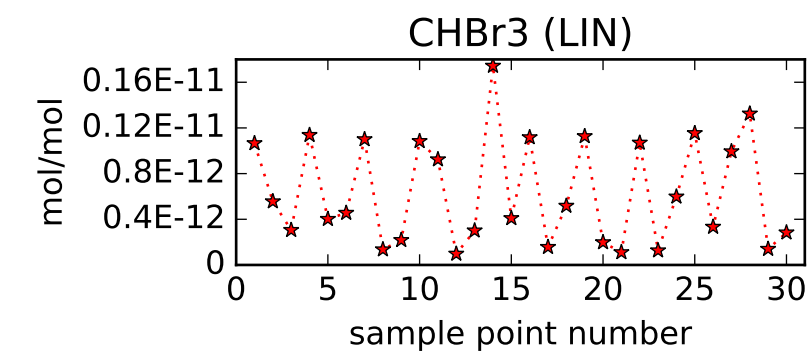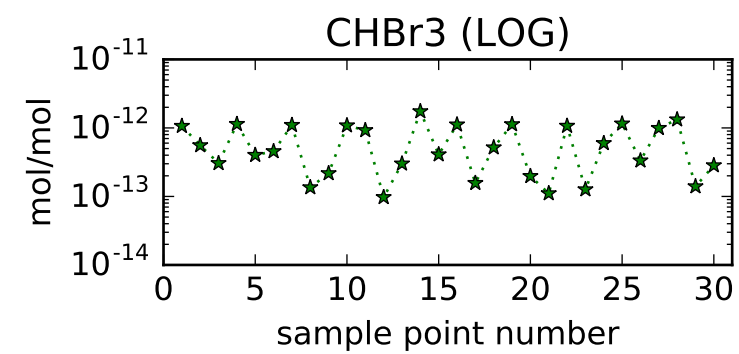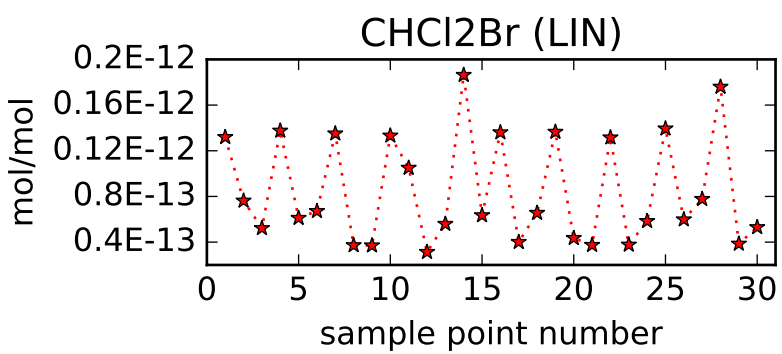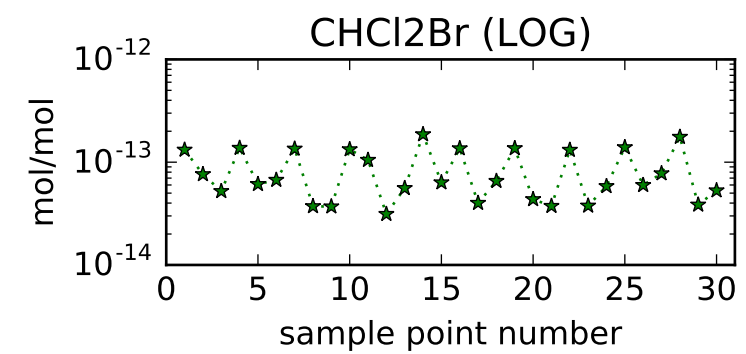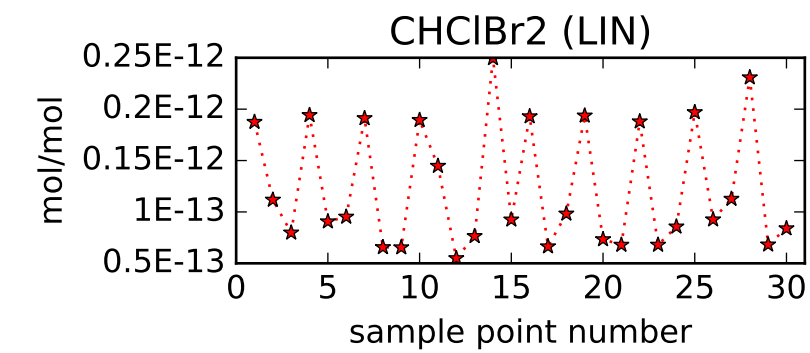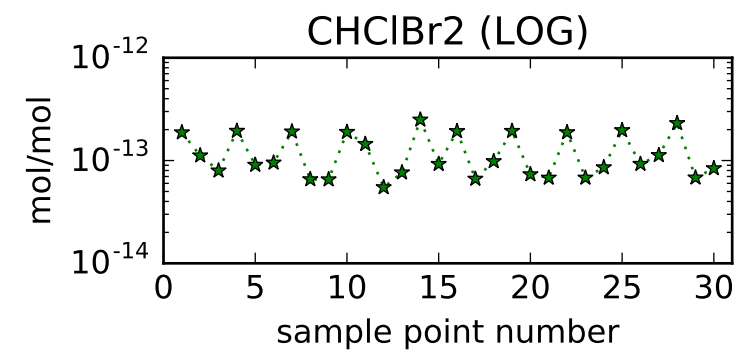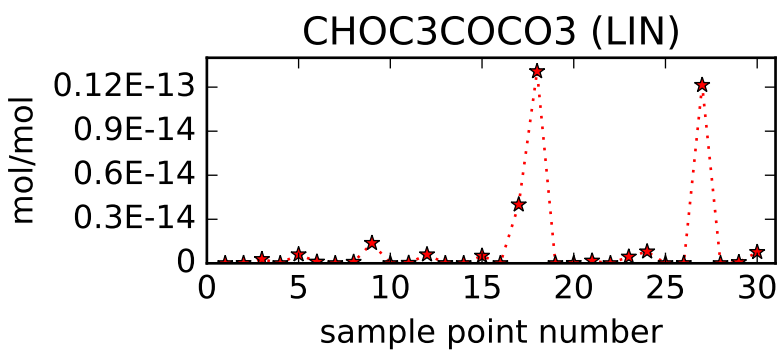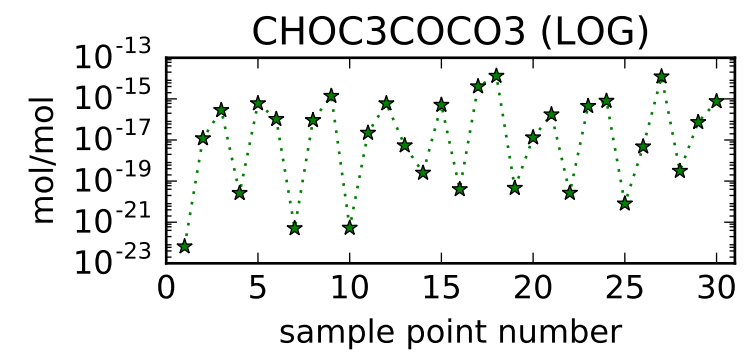

CHOC3COO2 (LIN)

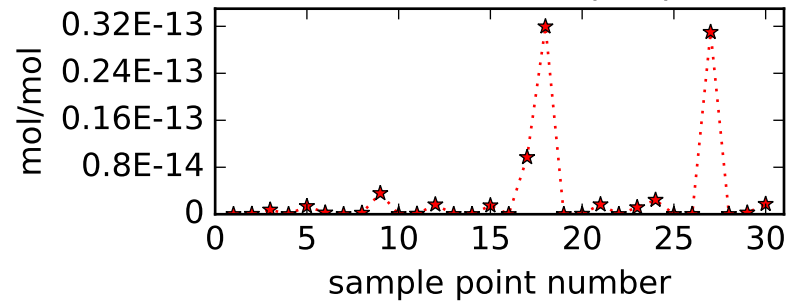

CHOC3COO2 (LOG)

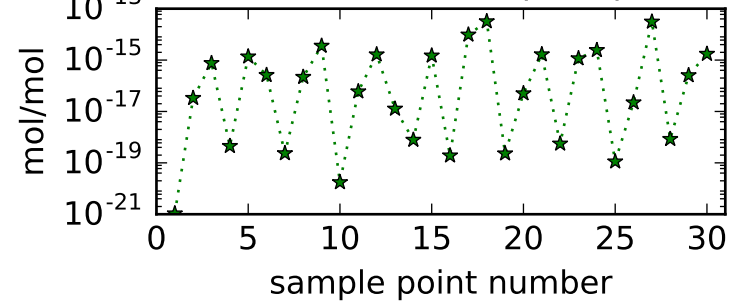

CHOC3COOOH (LIN)

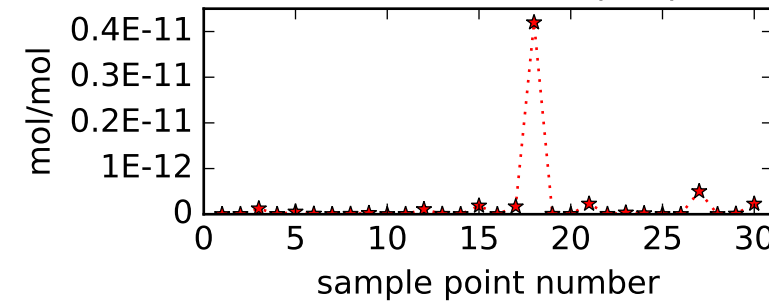

CHOC3COOOH (LOG)

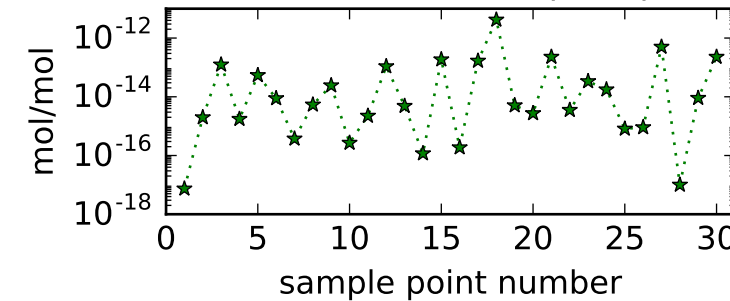

CHOC3COPAN (LIN)

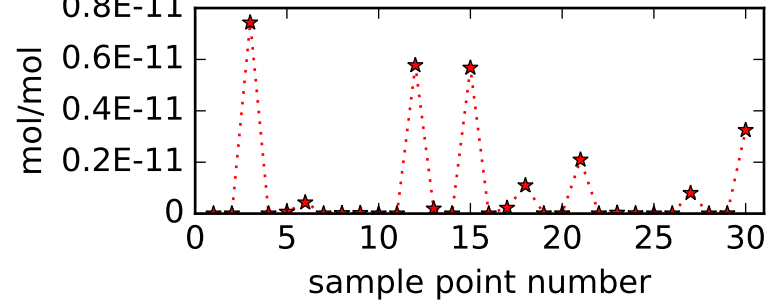

CHOC3COPAN (LOG)

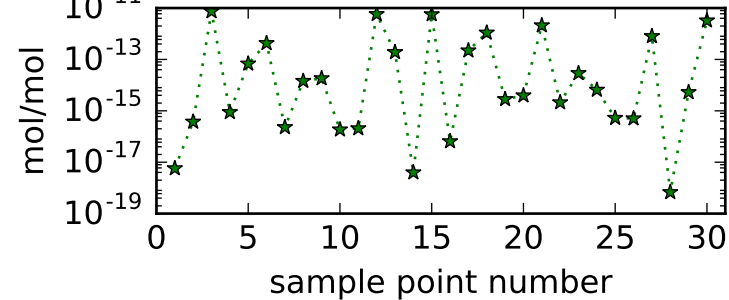

CHOCOCH2O2 (LIN)

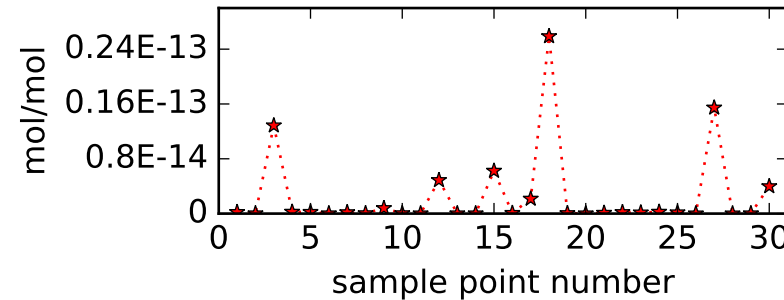

CHOCOCH2O2 (LOG)

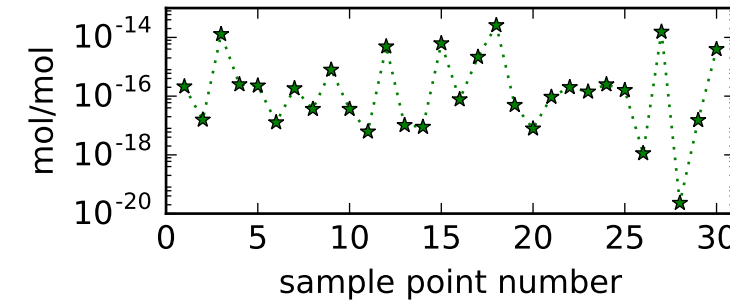

CN (LIN)

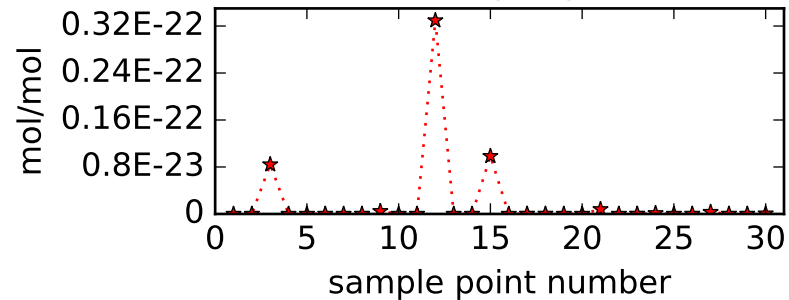

CN (LOG)

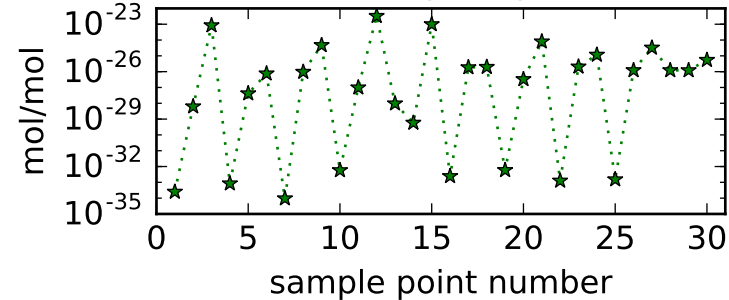

CO (LIN)

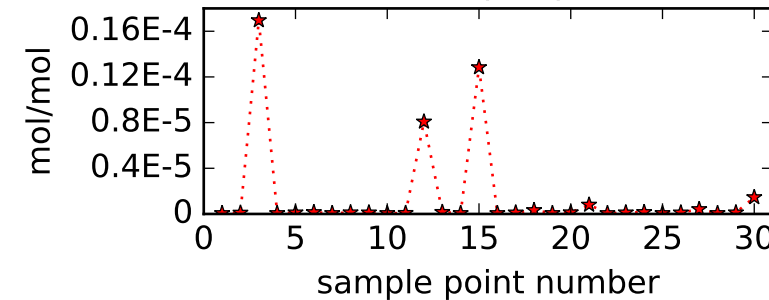

CO (LOG)

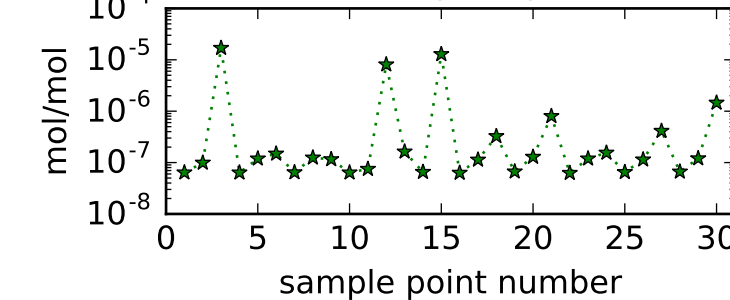

CO13C4CHO (LIN)

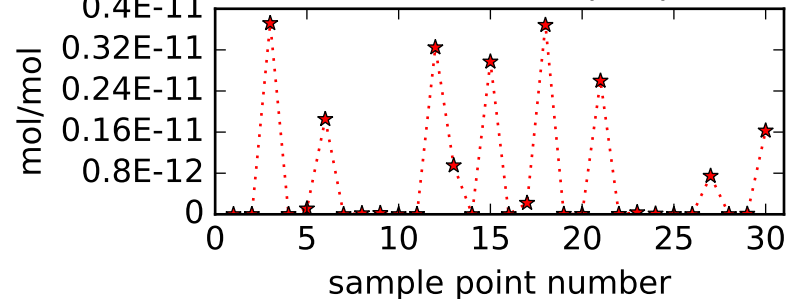

CO13C4CHO (LOG)

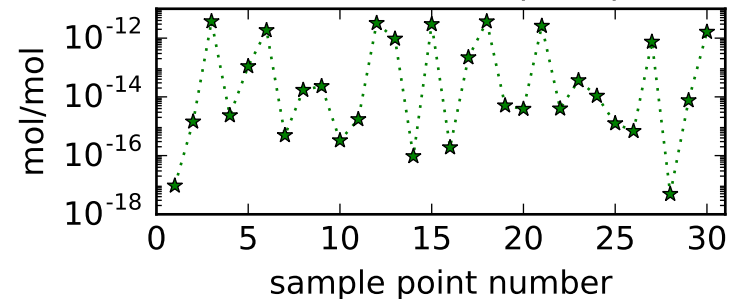

CO14O3CHO (LIN)

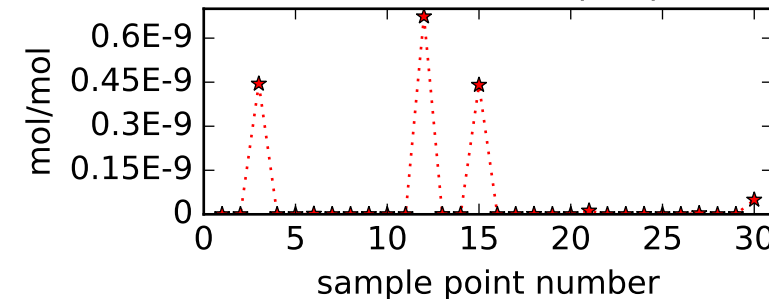

CO14O3CHO (LOG)

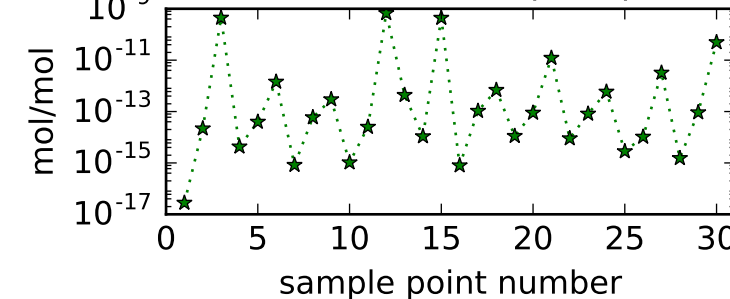



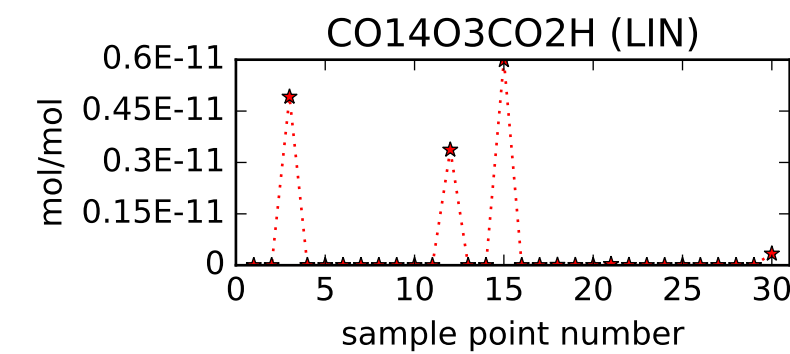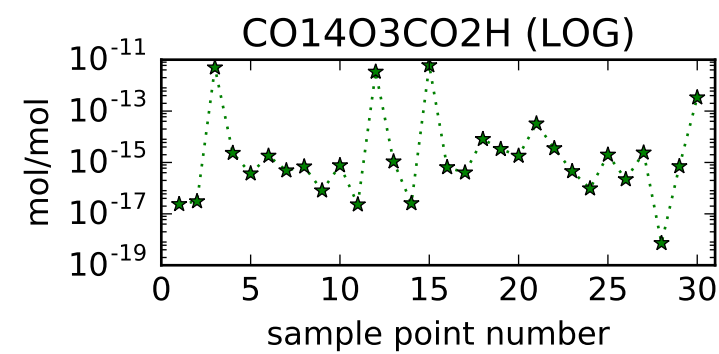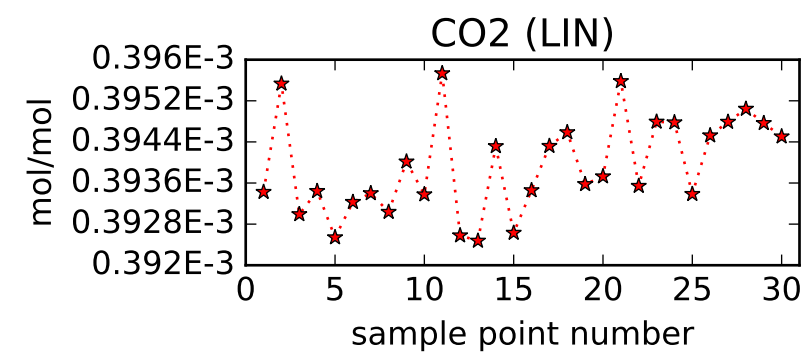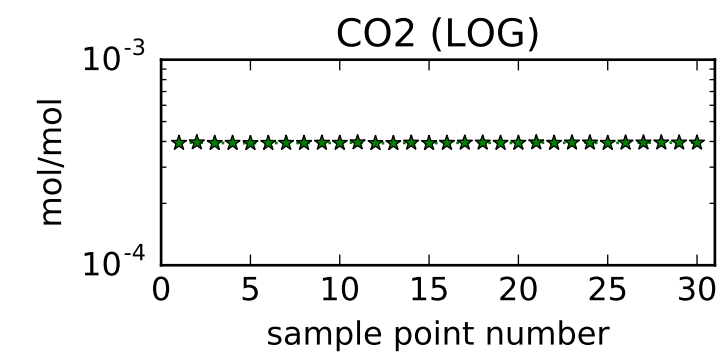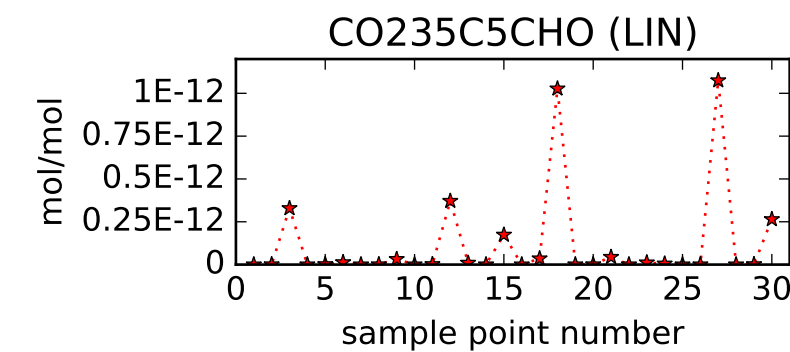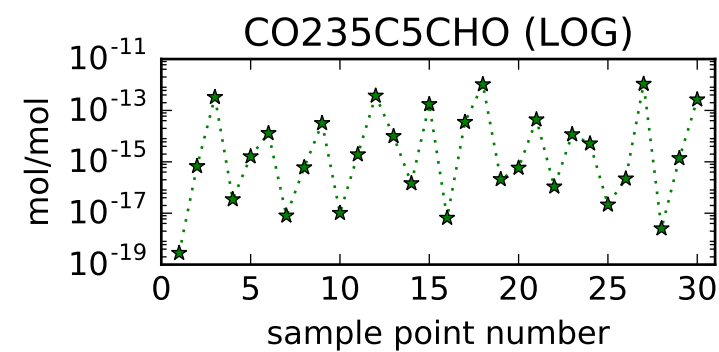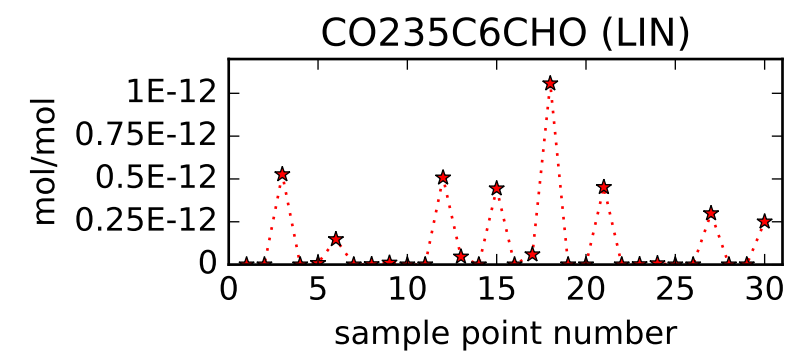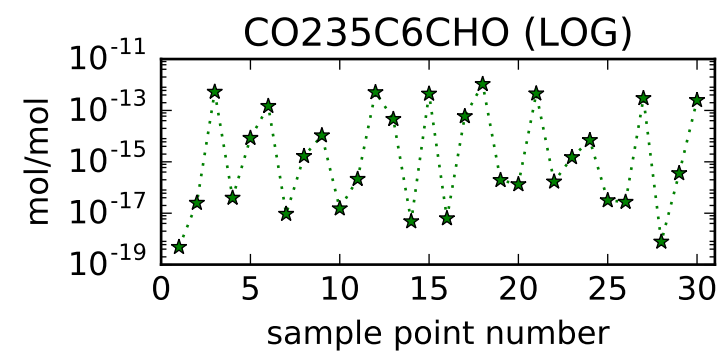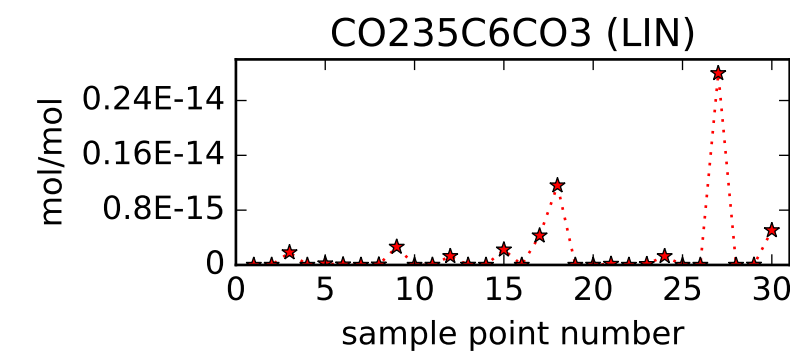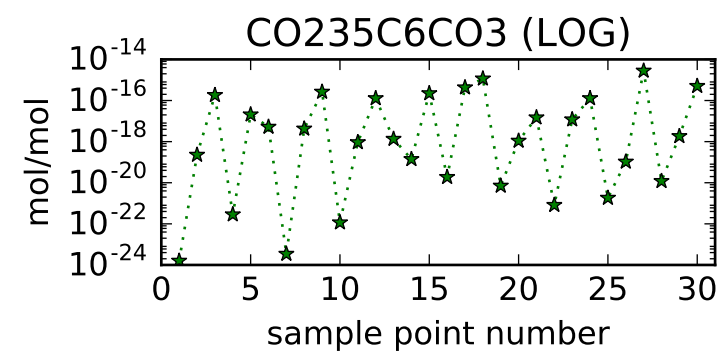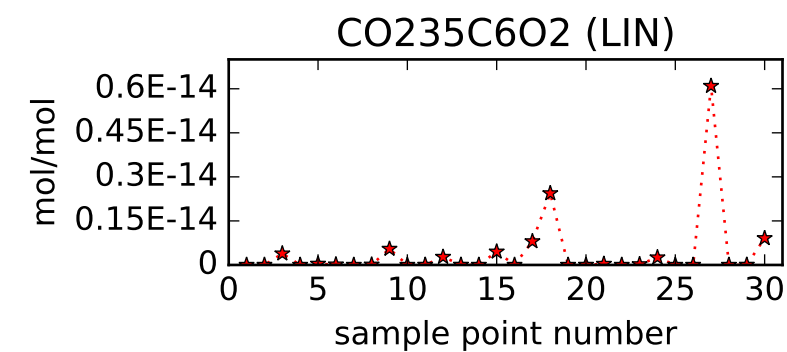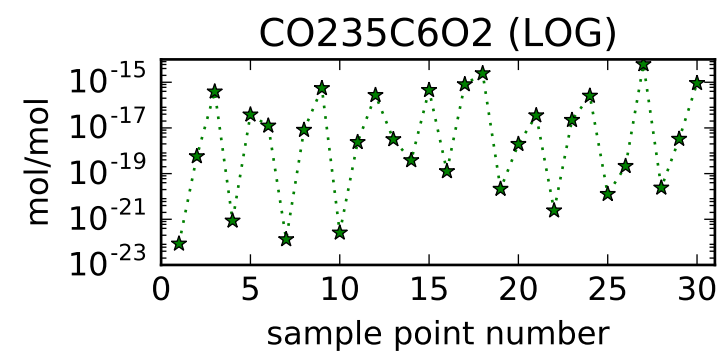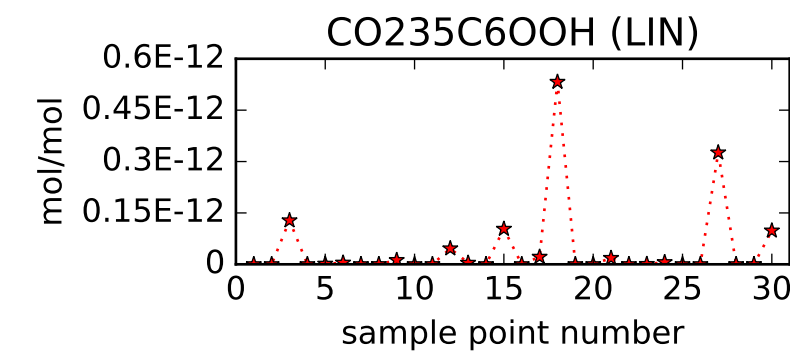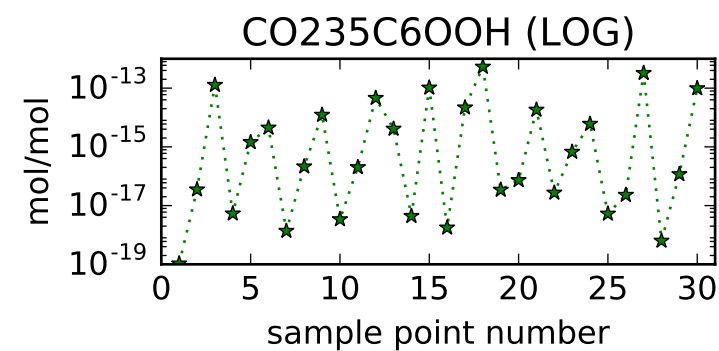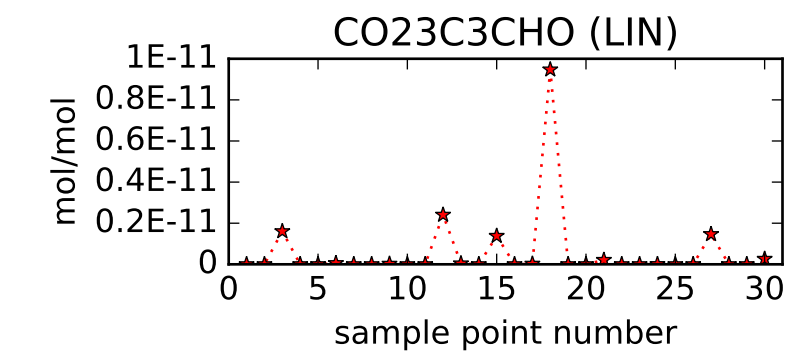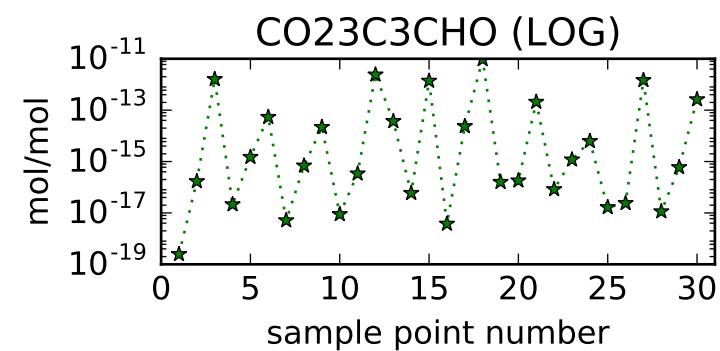

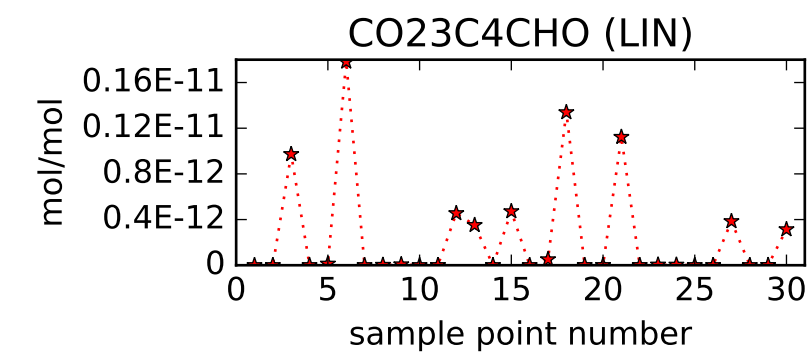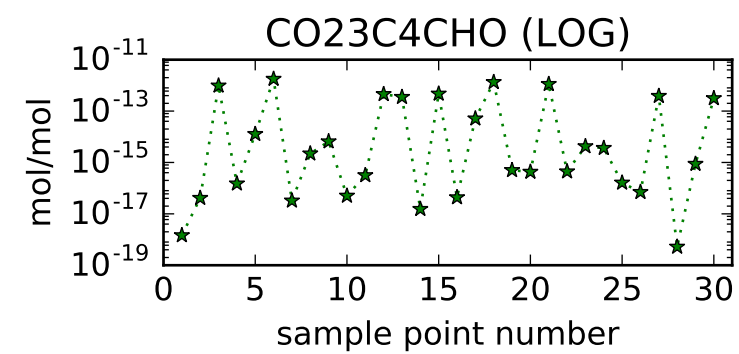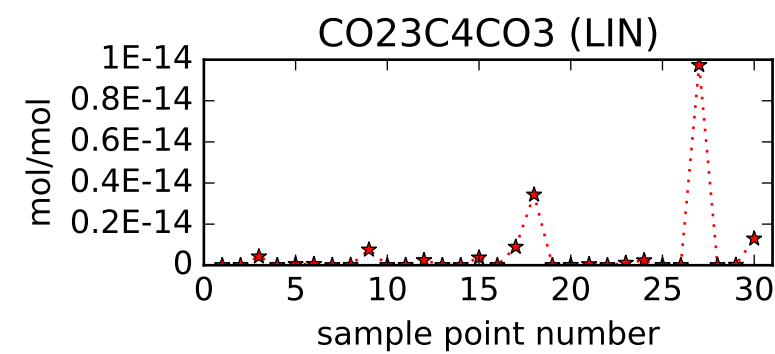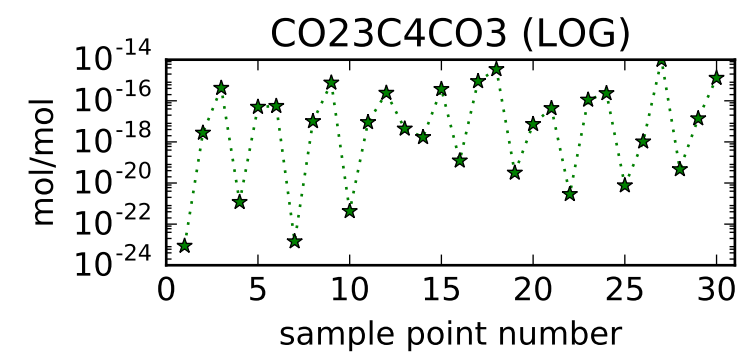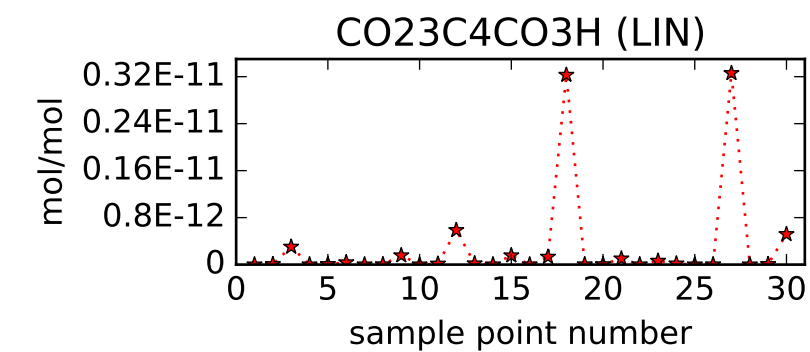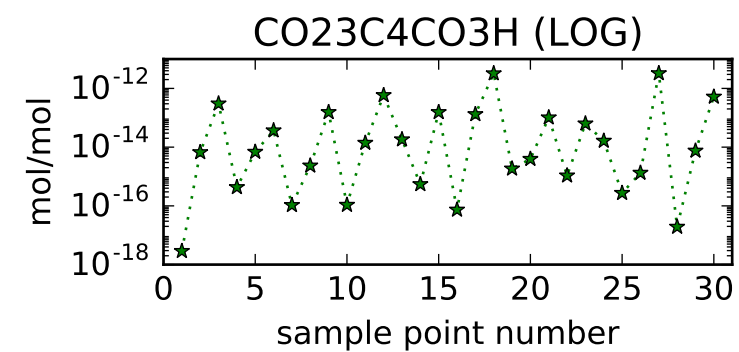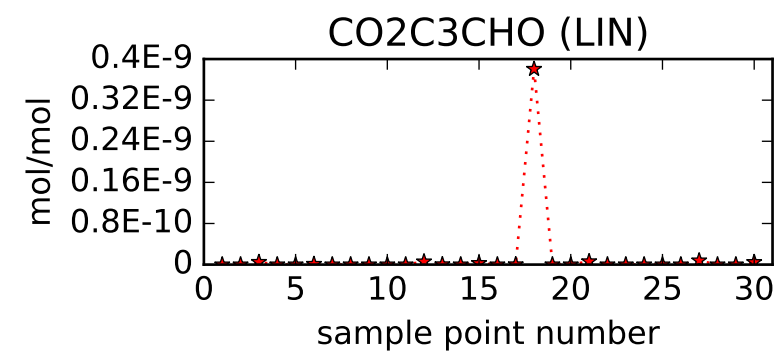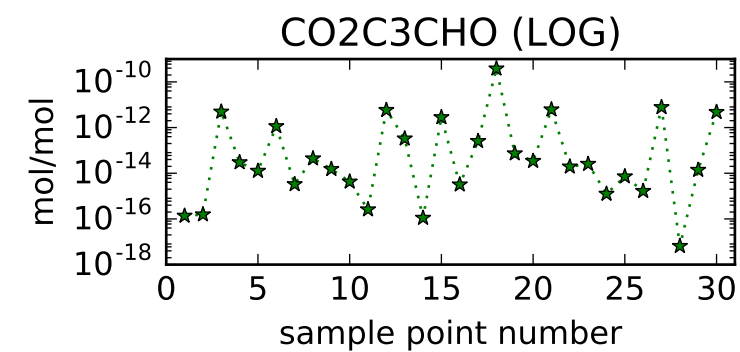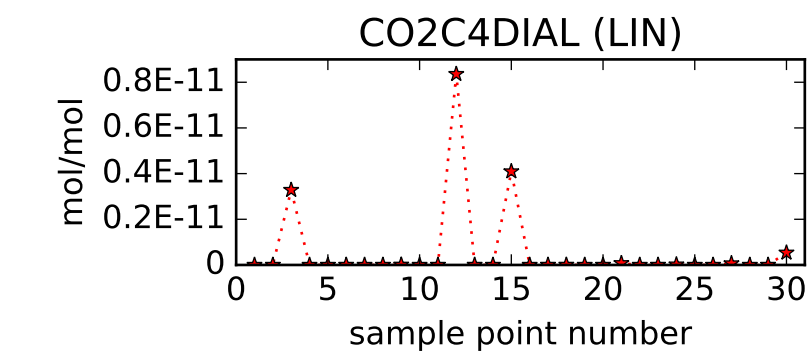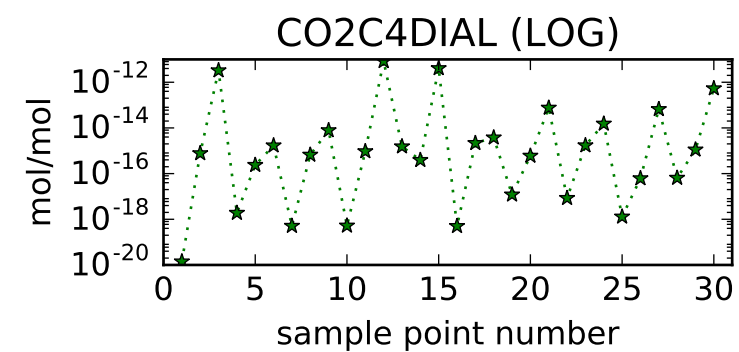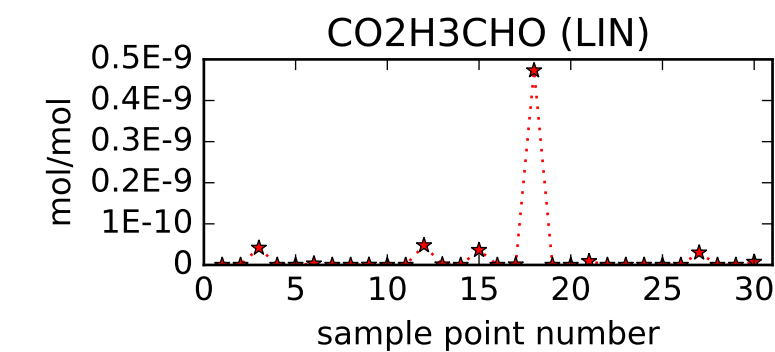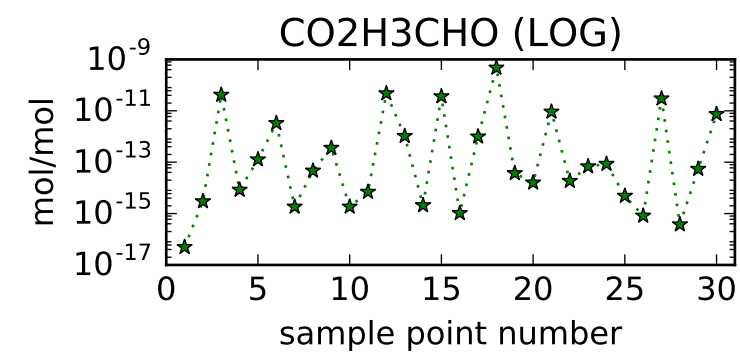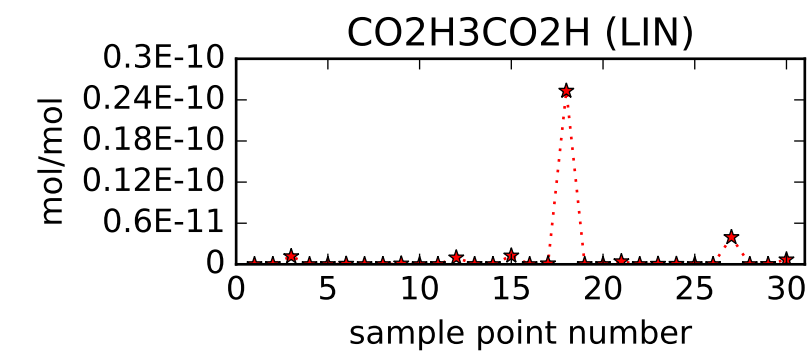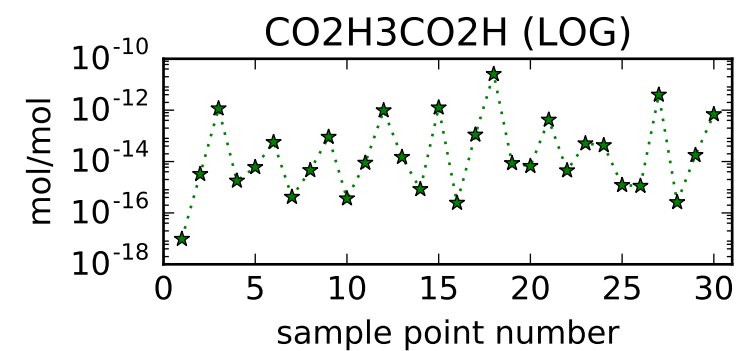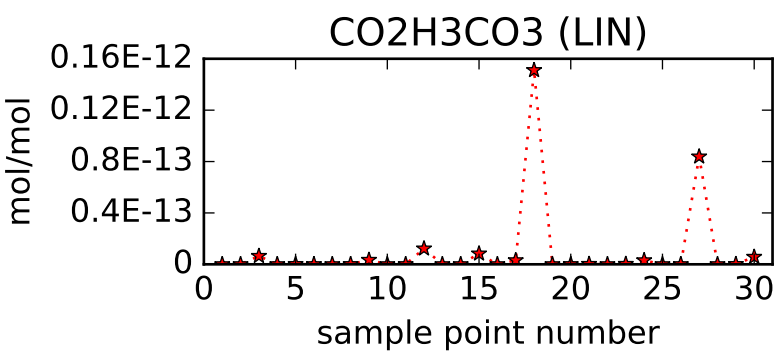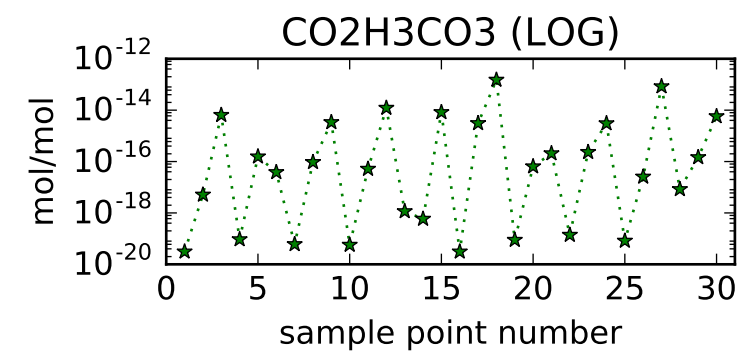

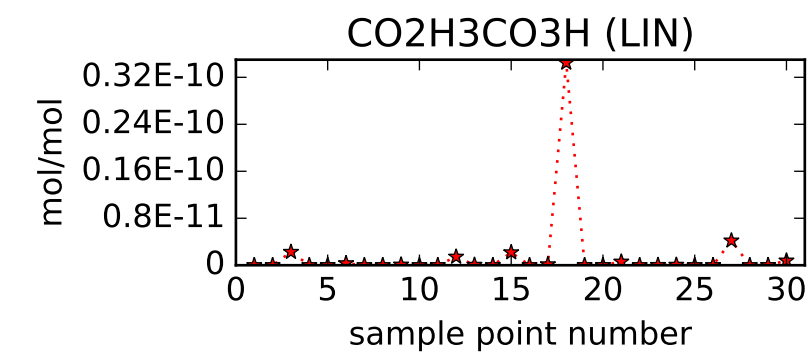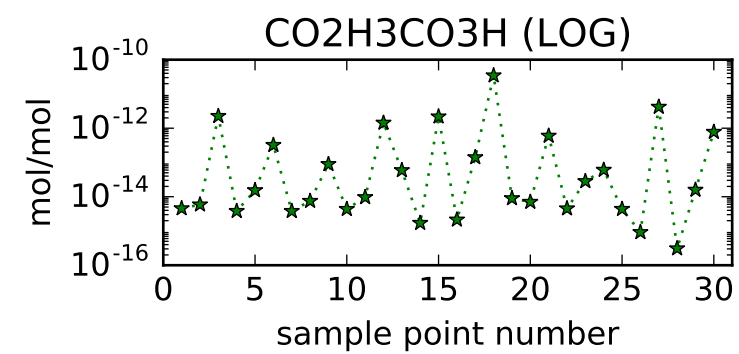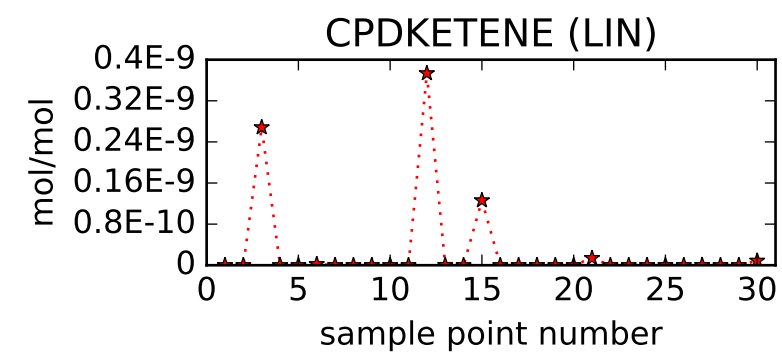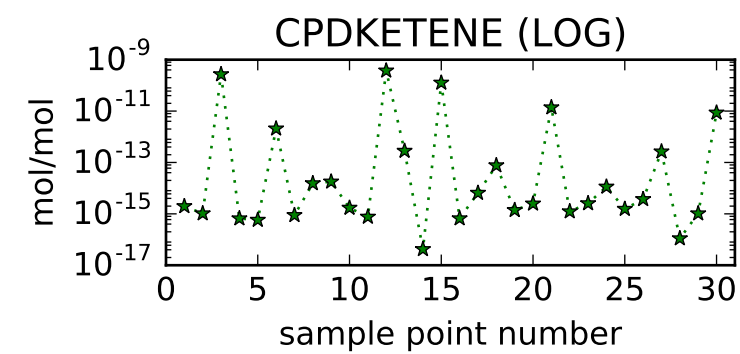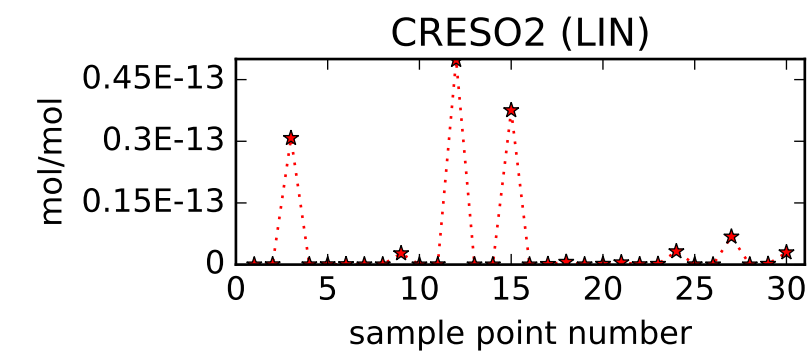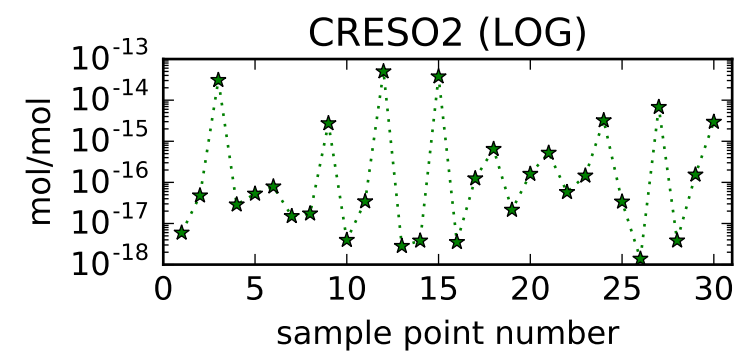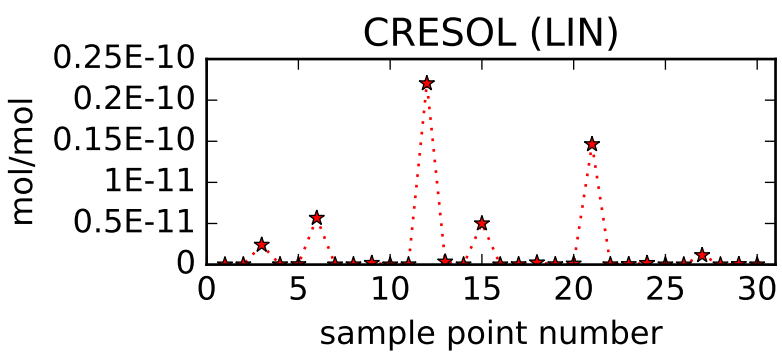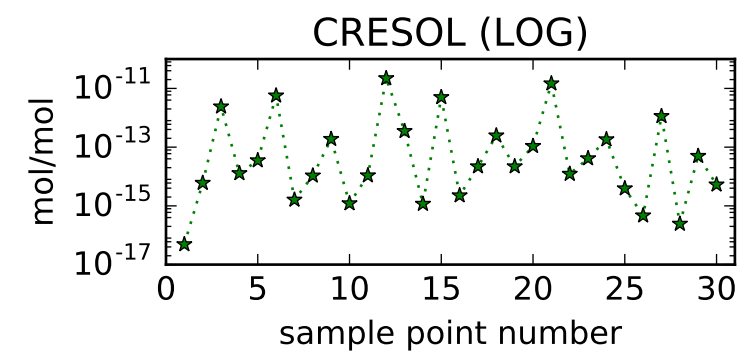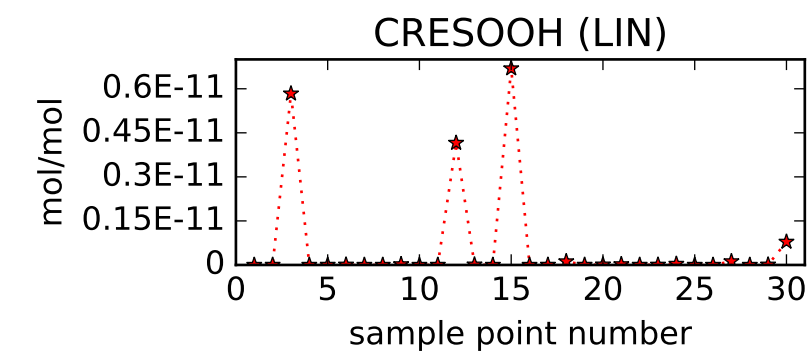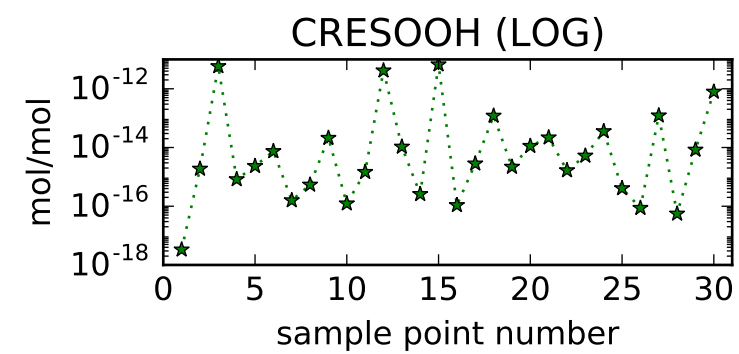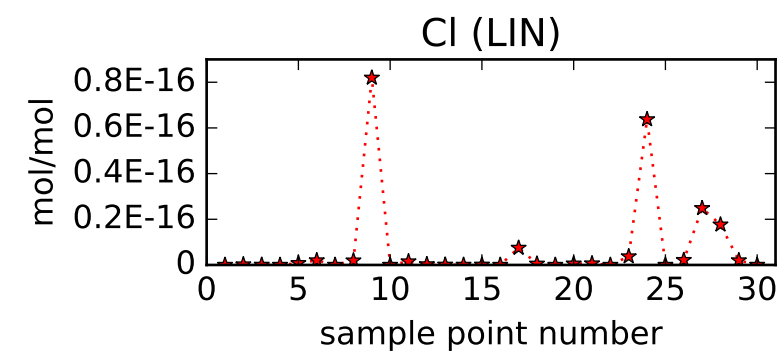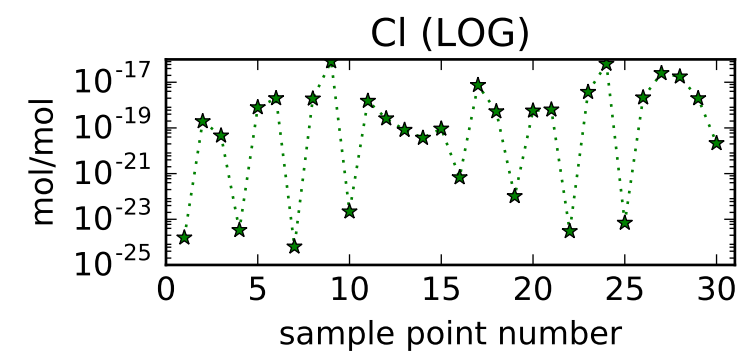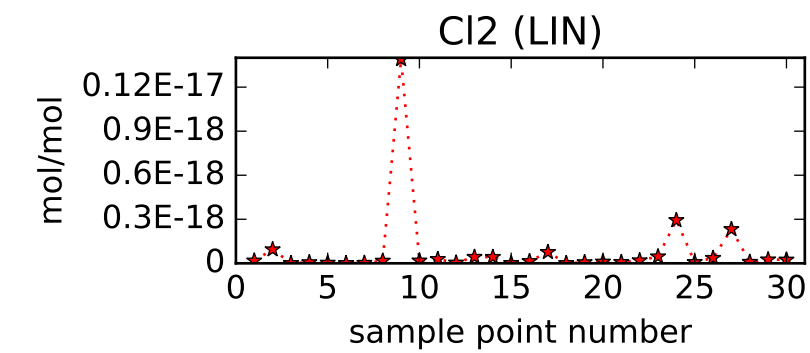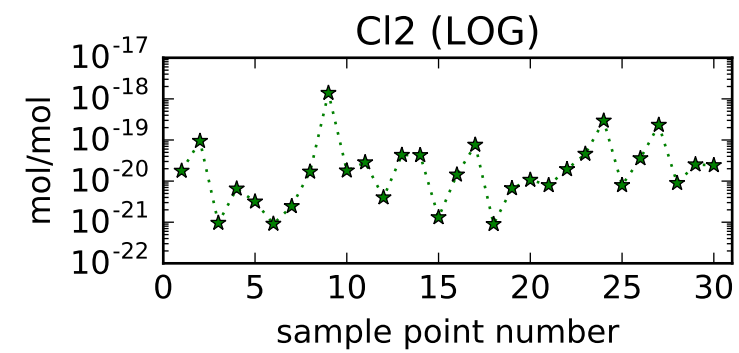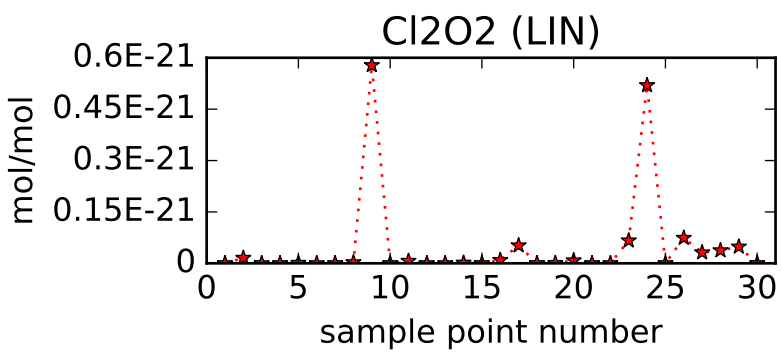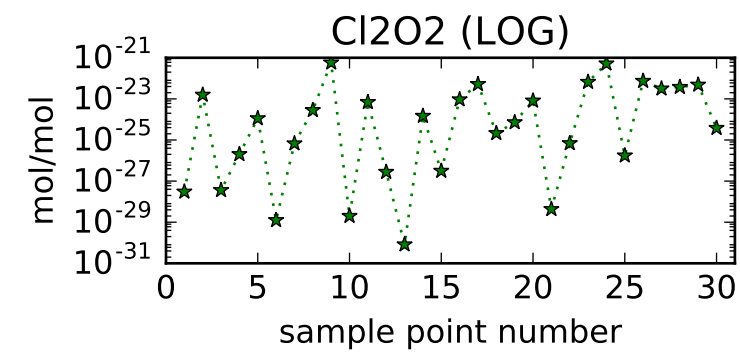

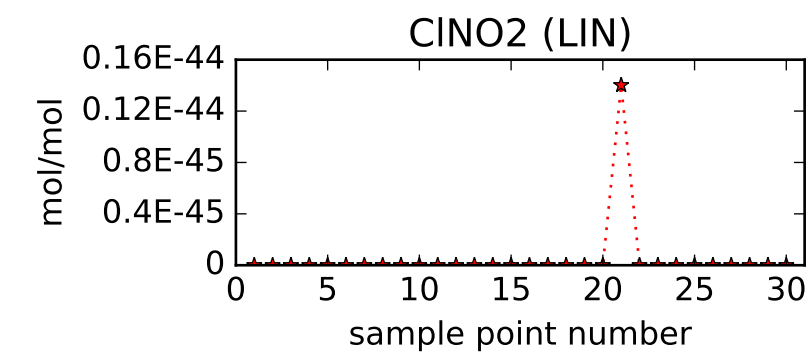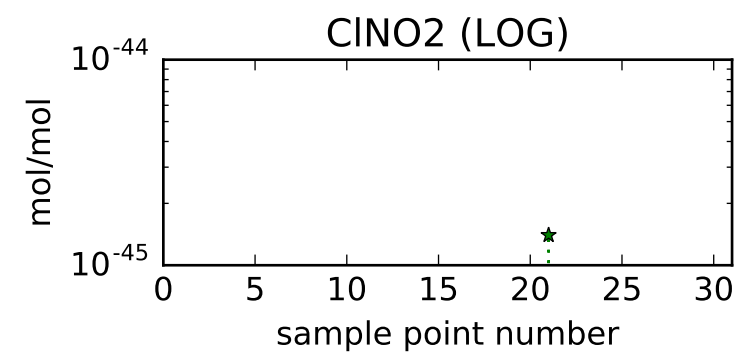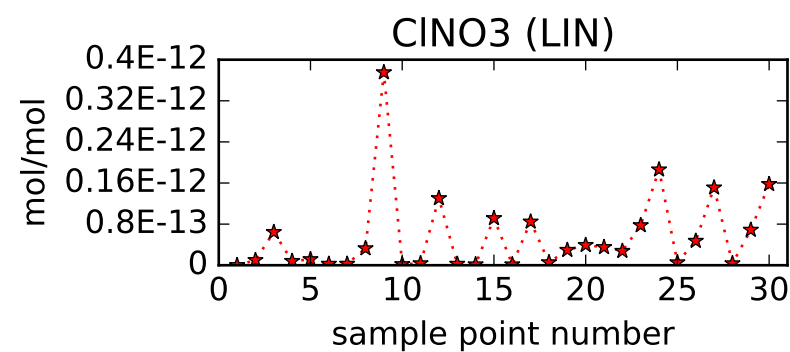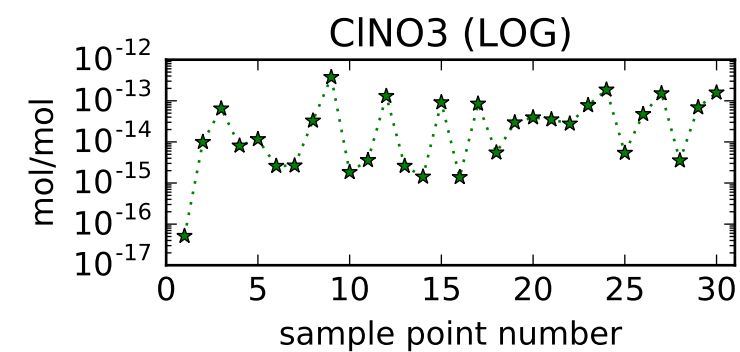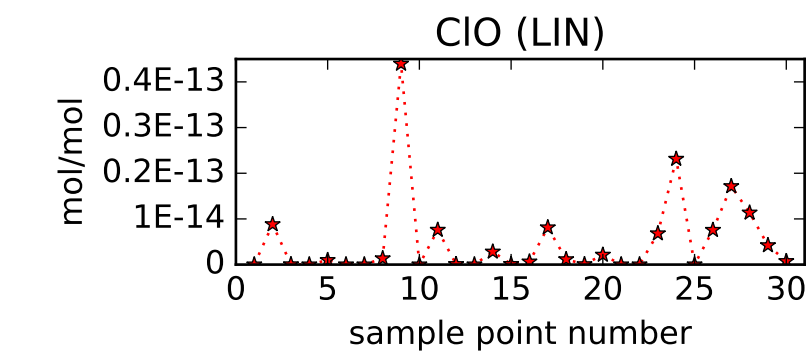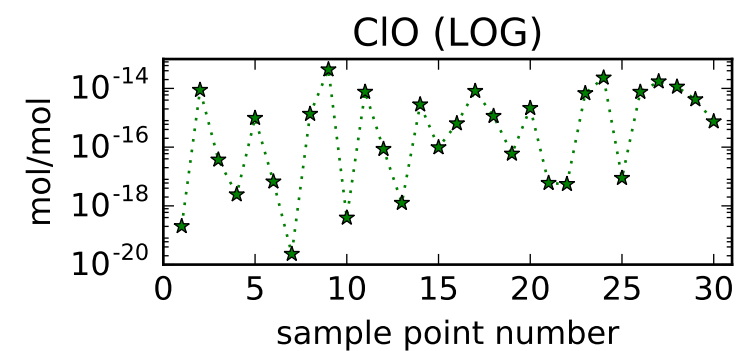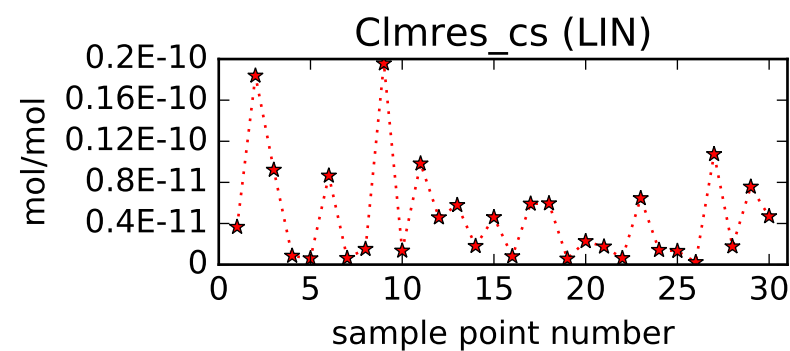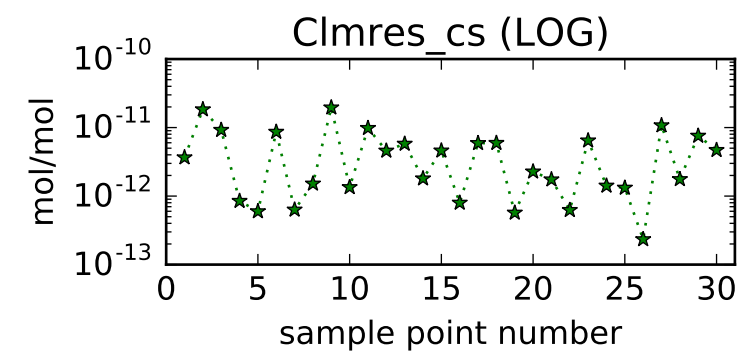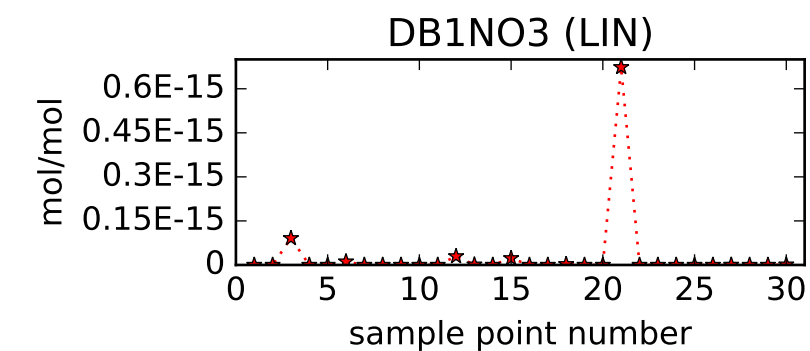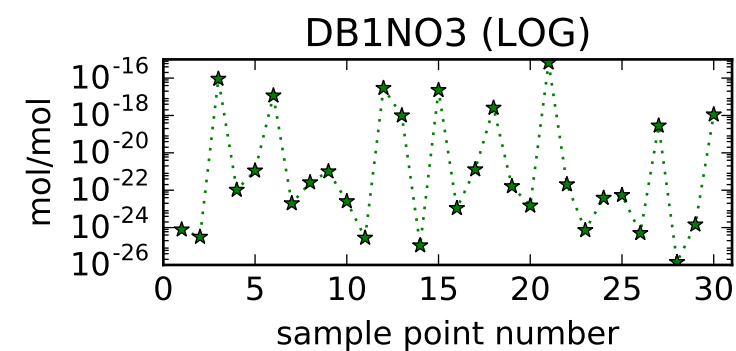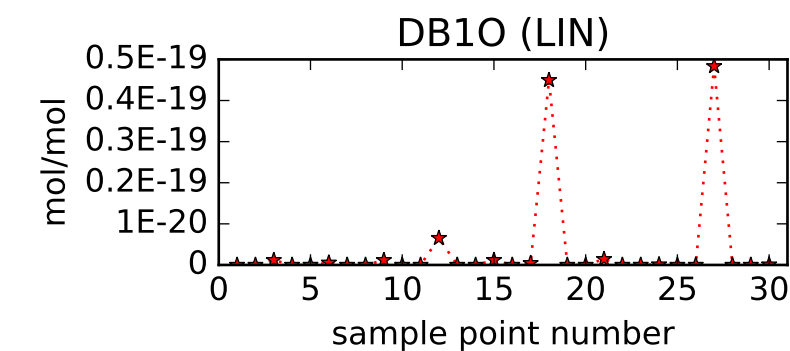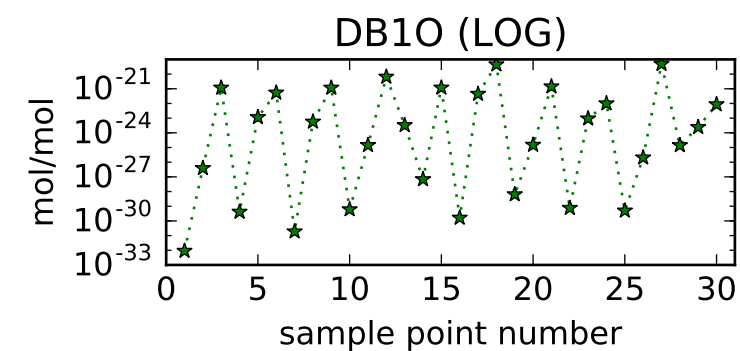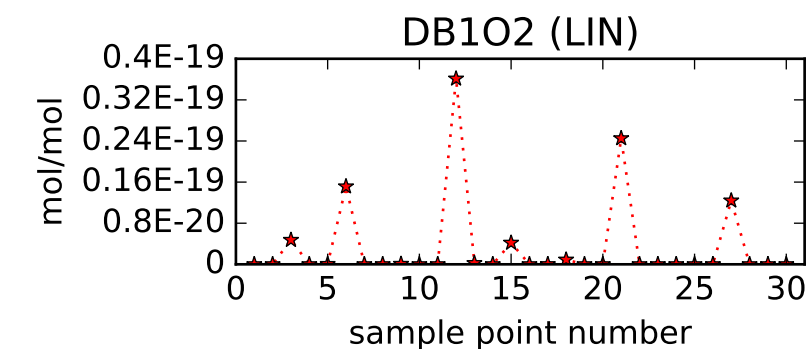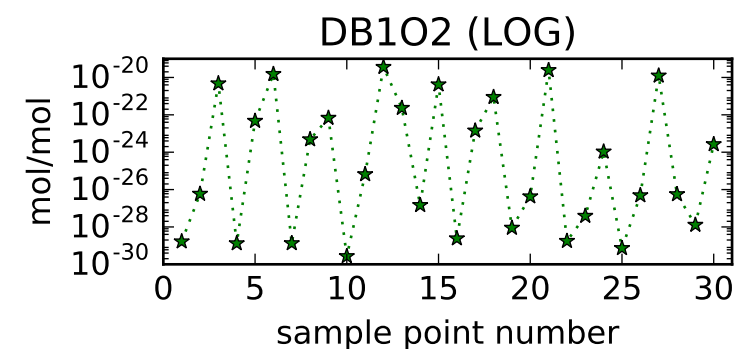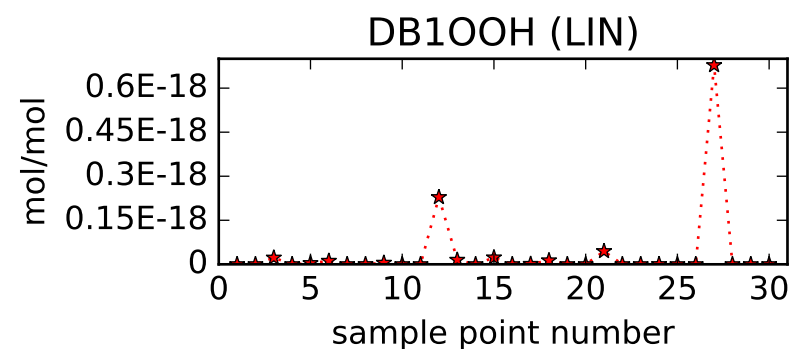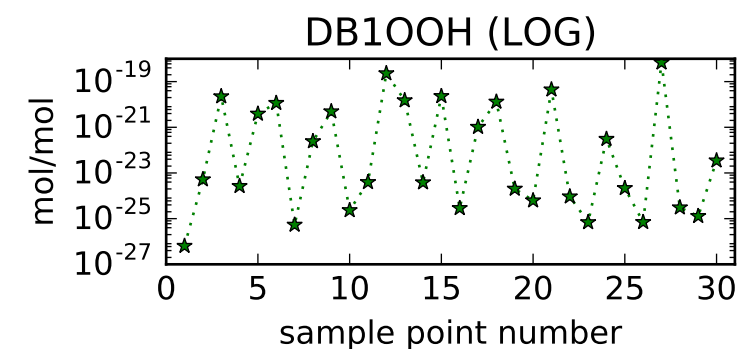

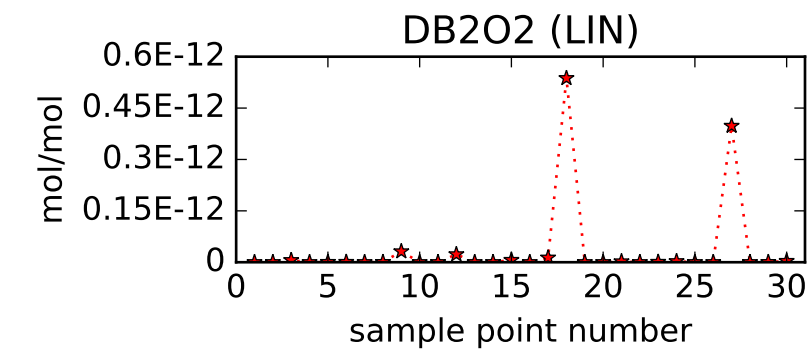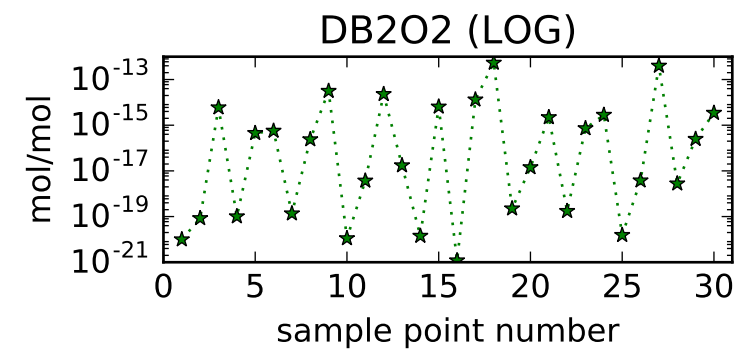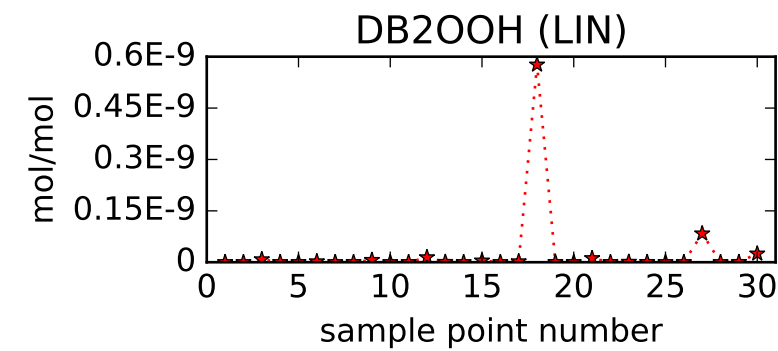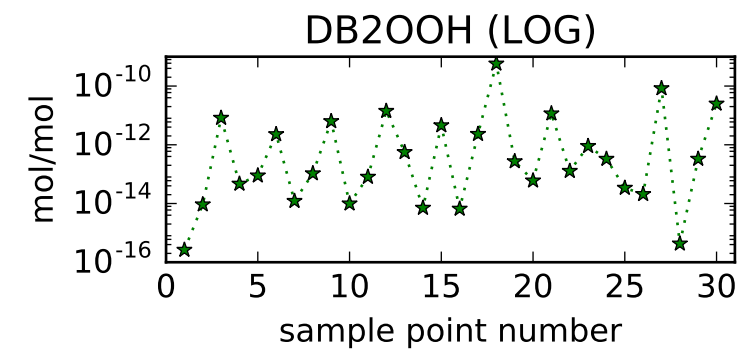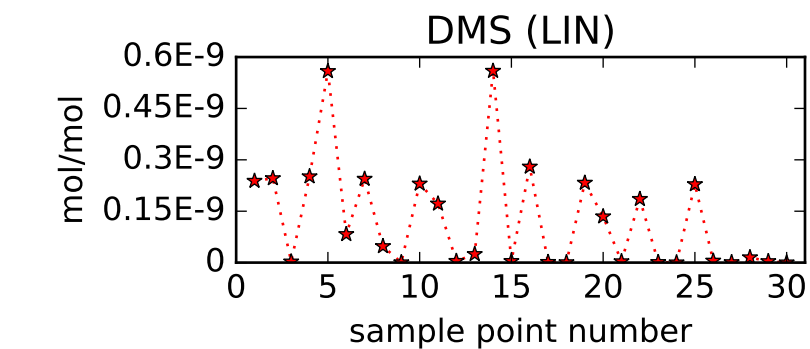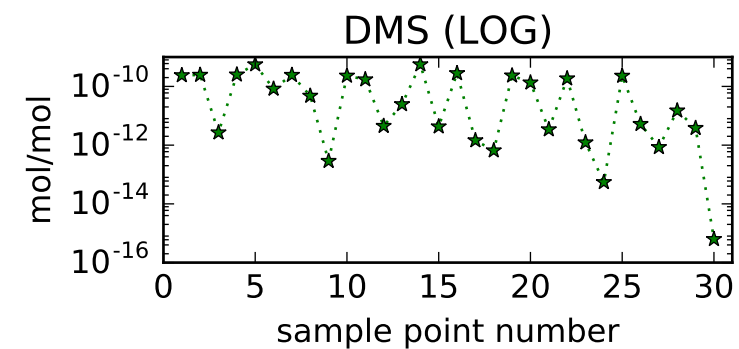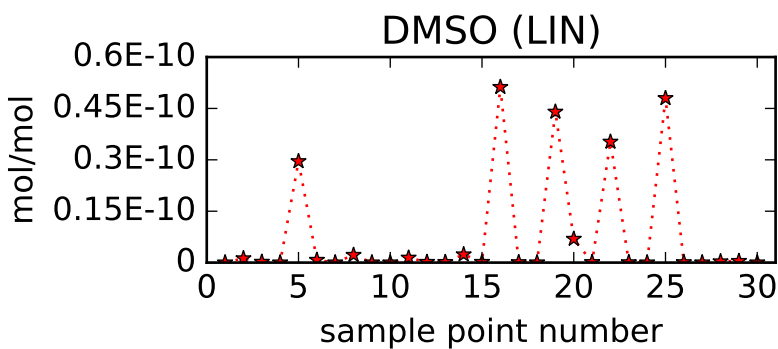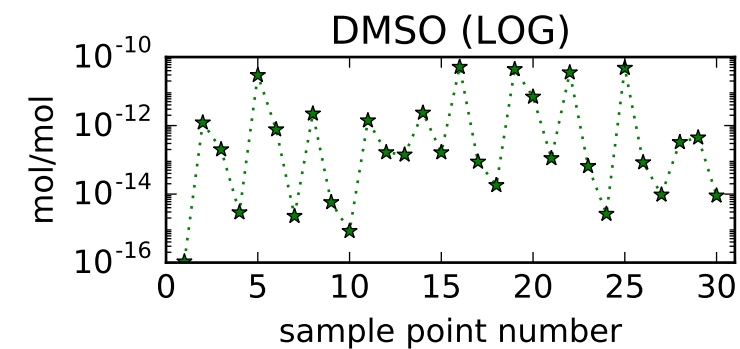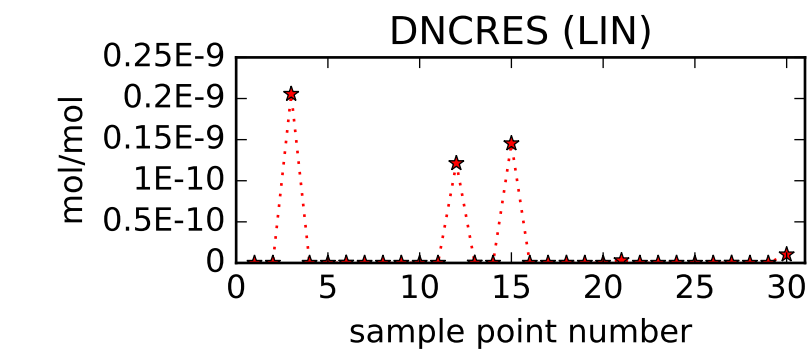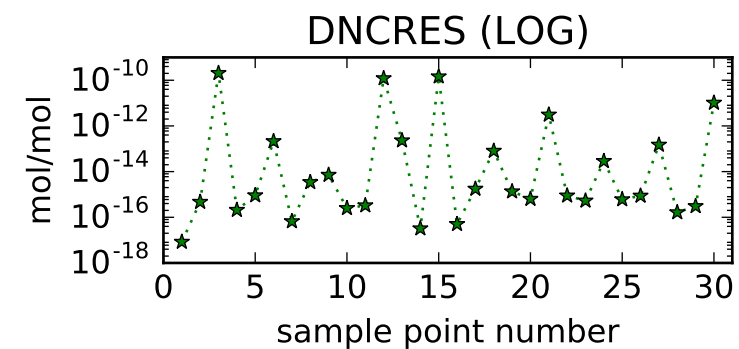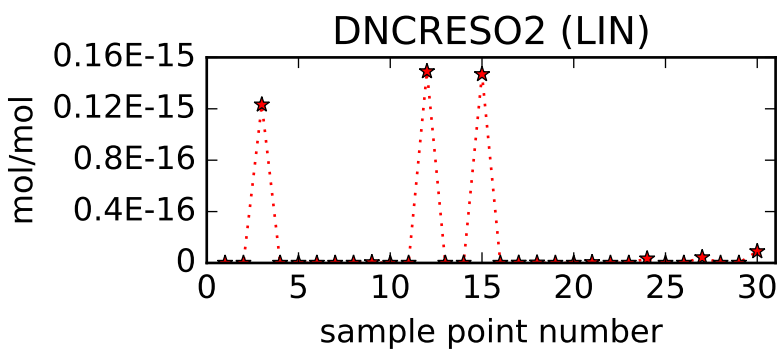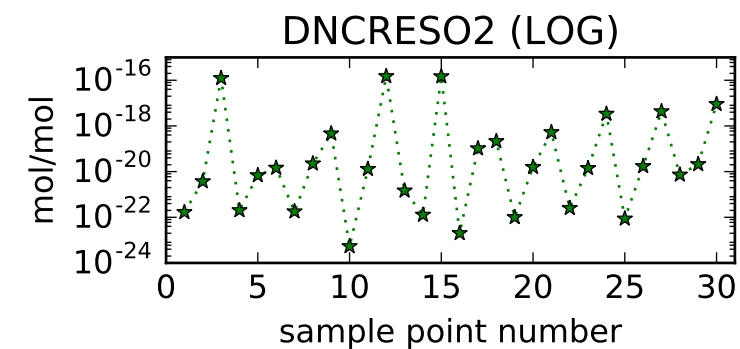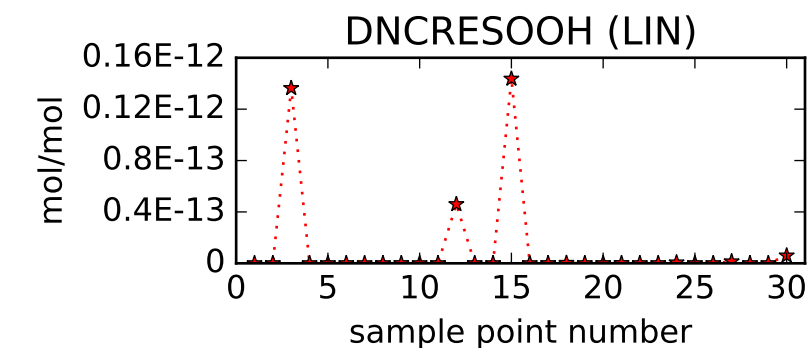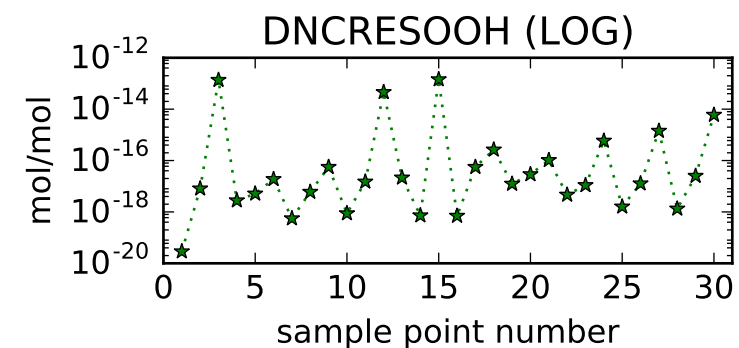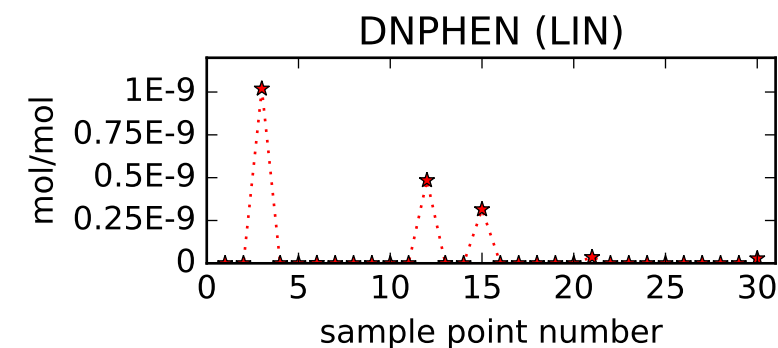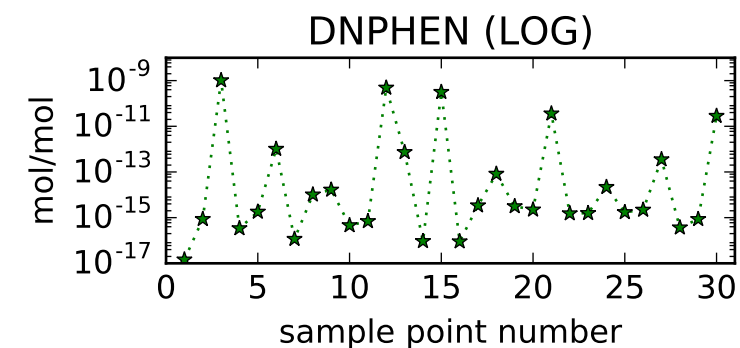



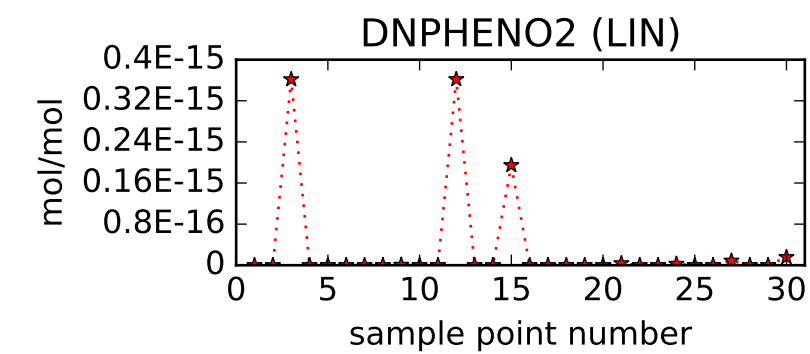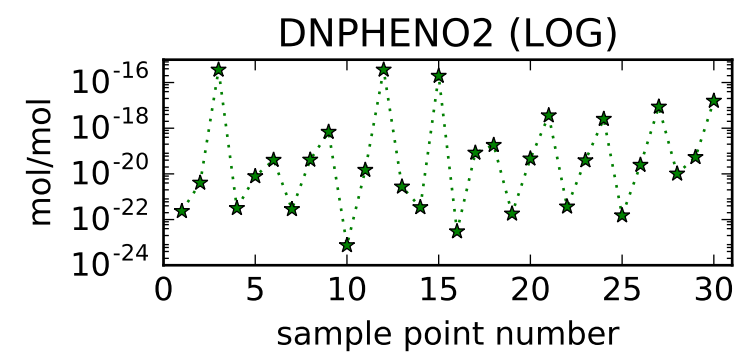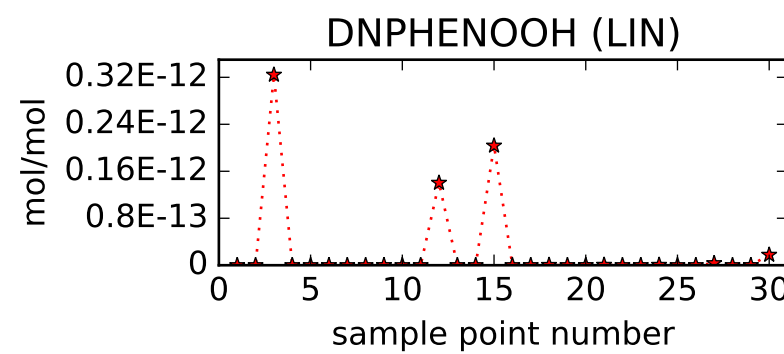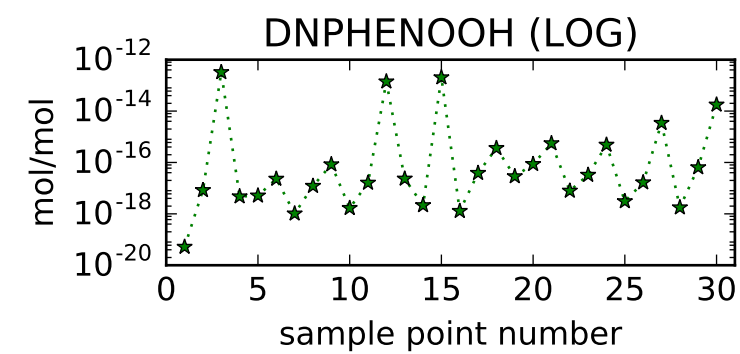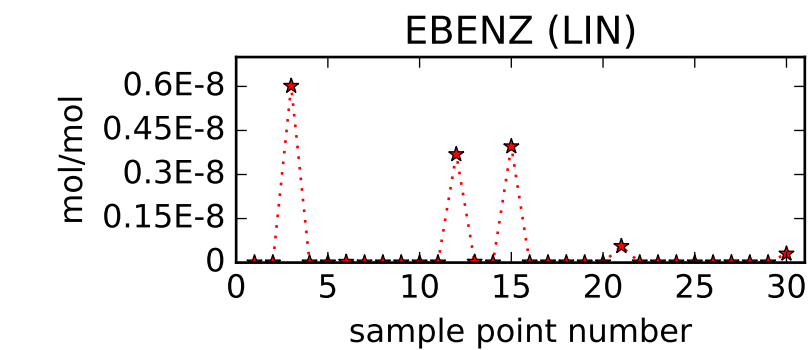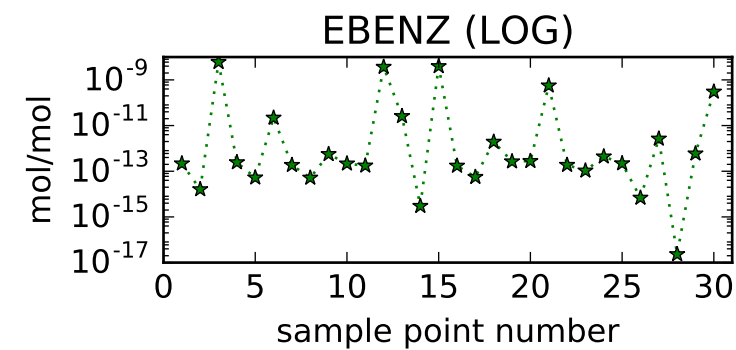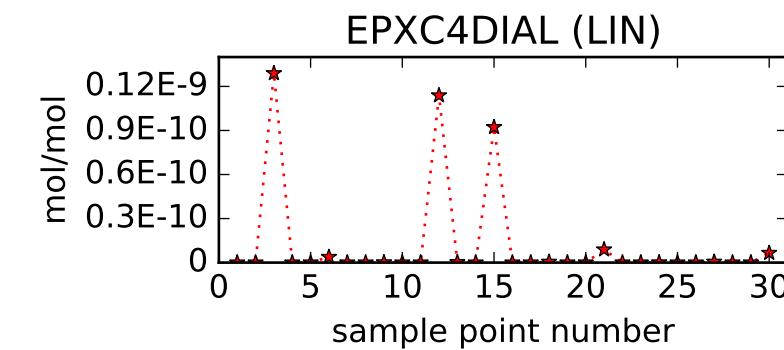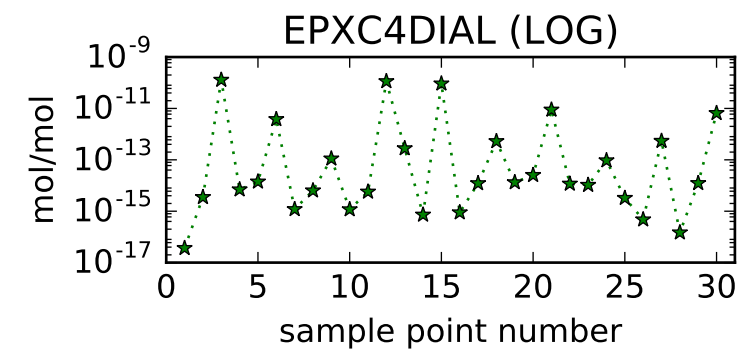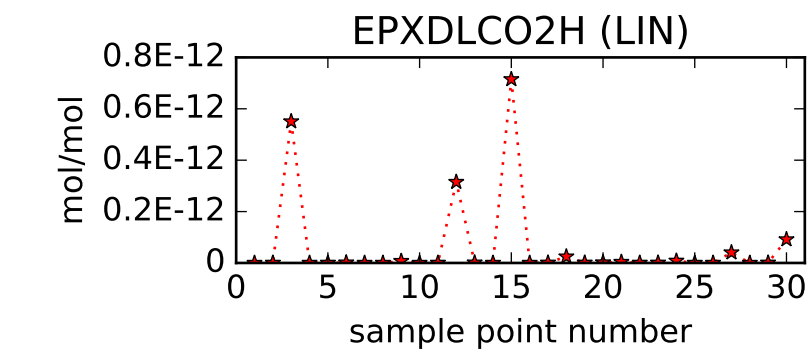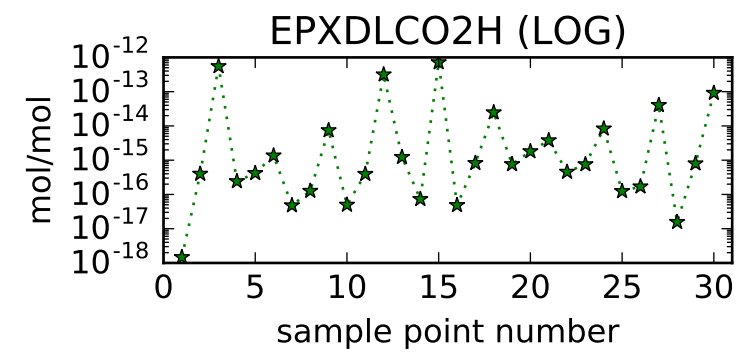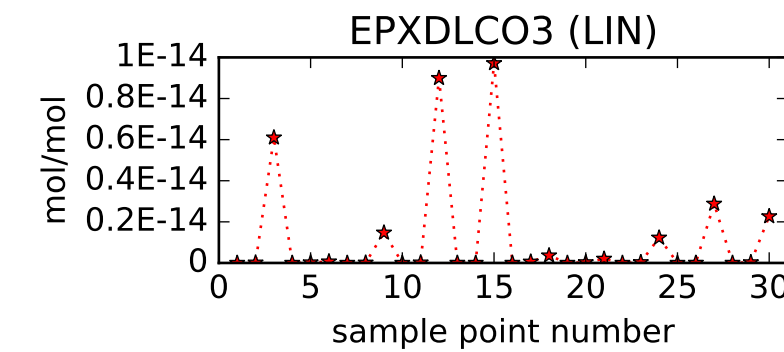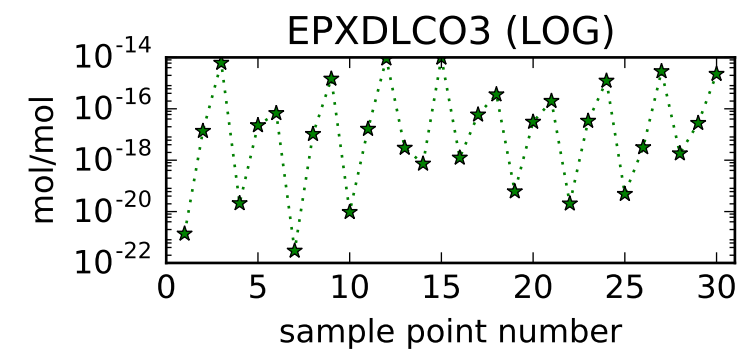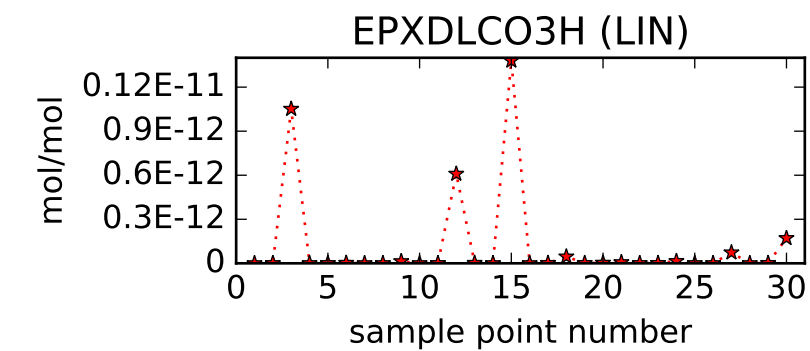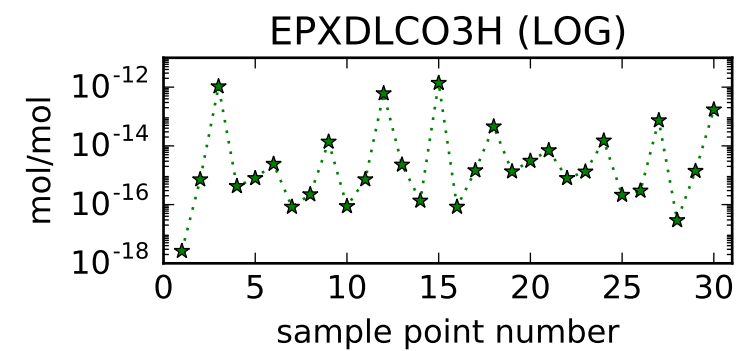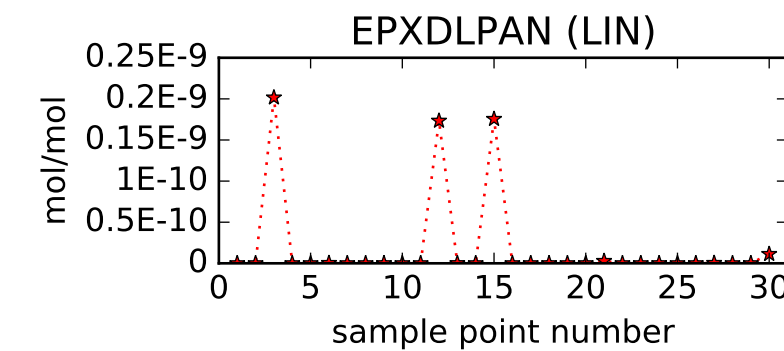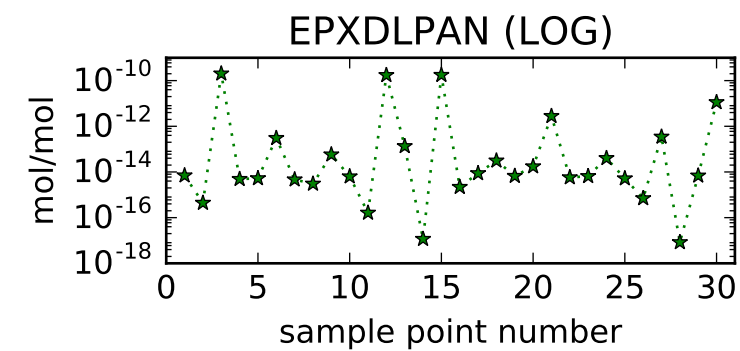

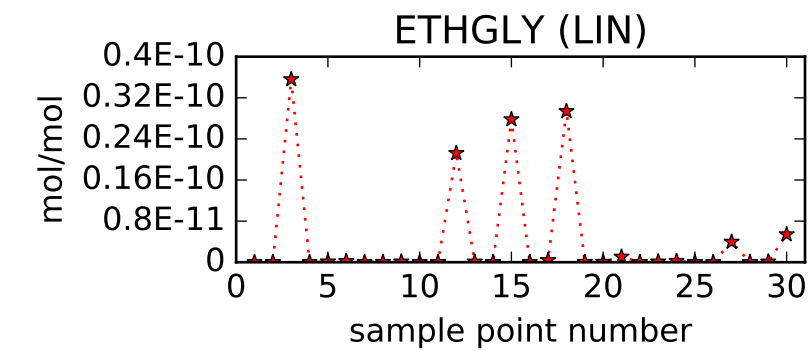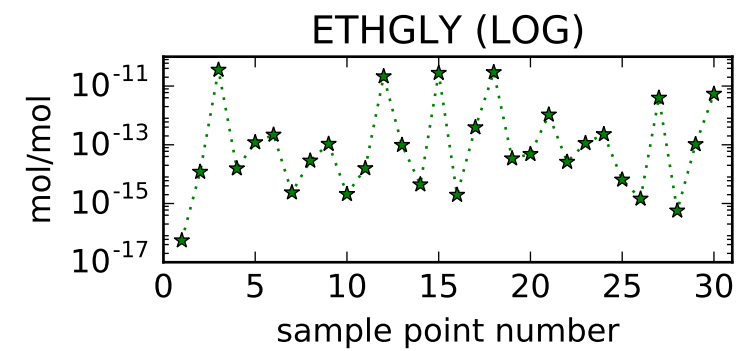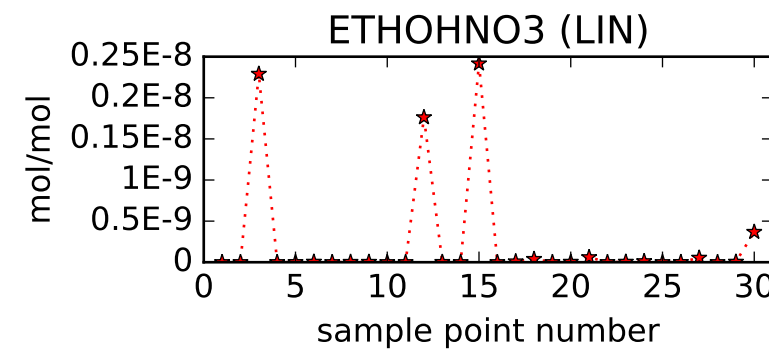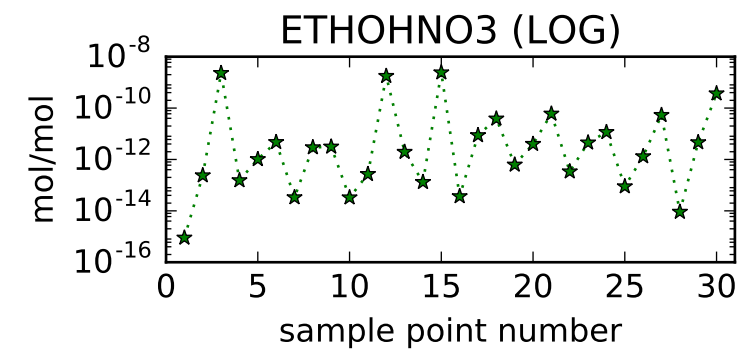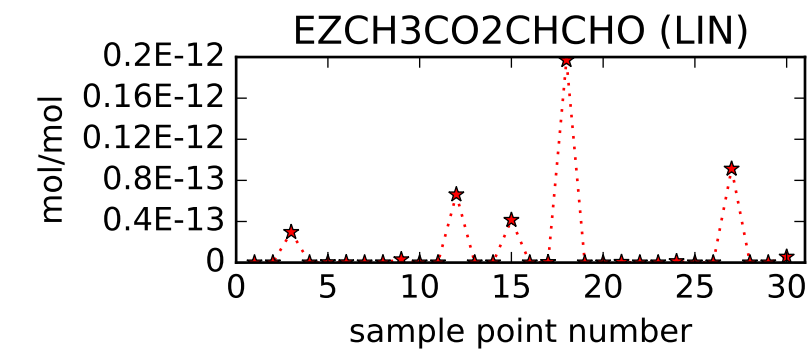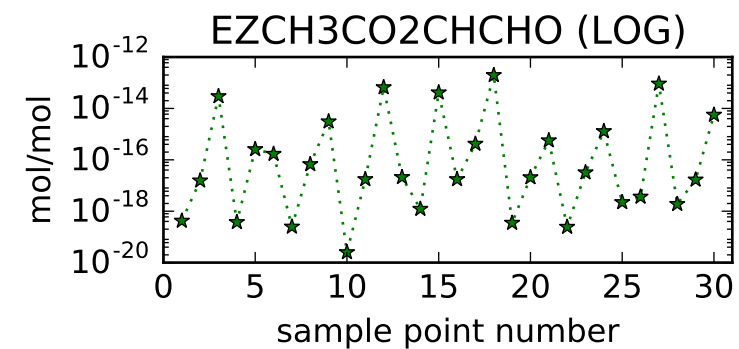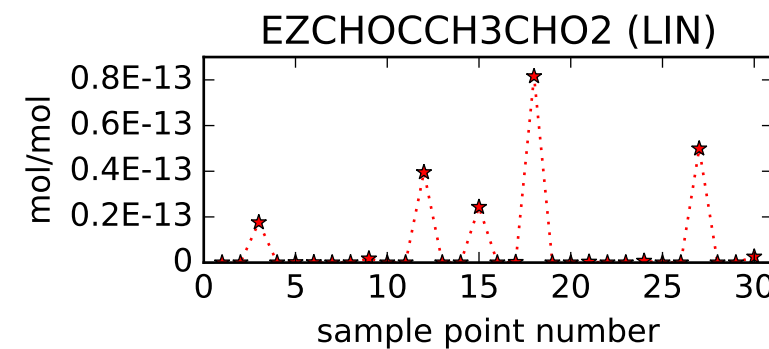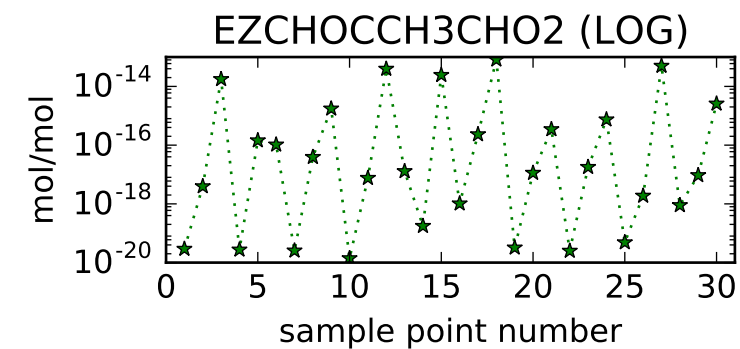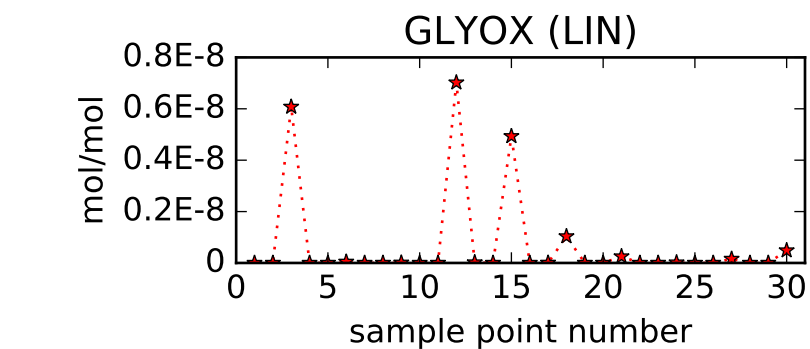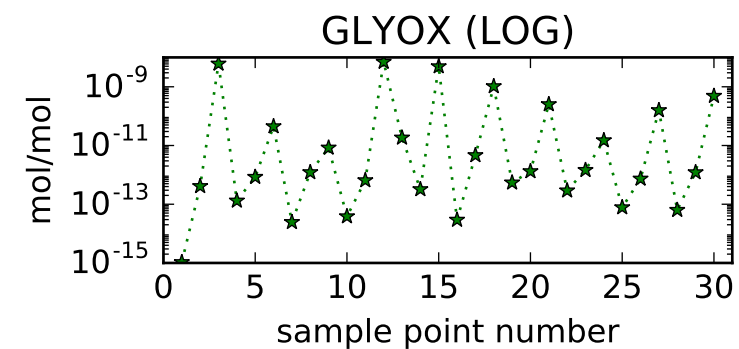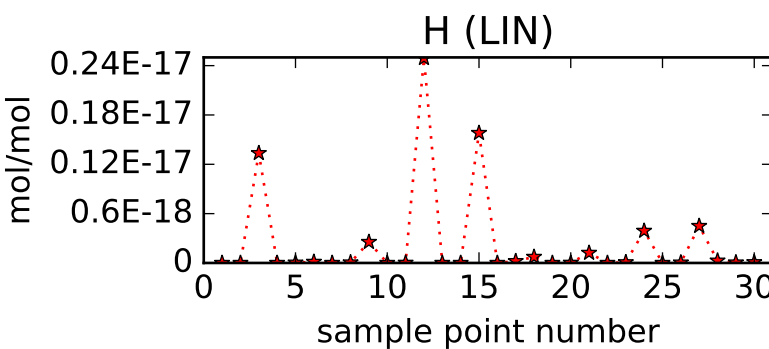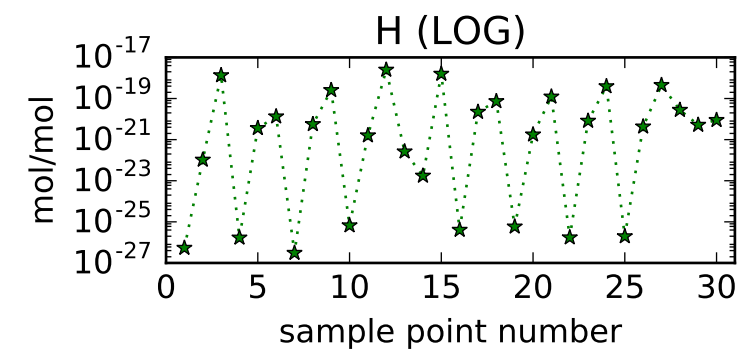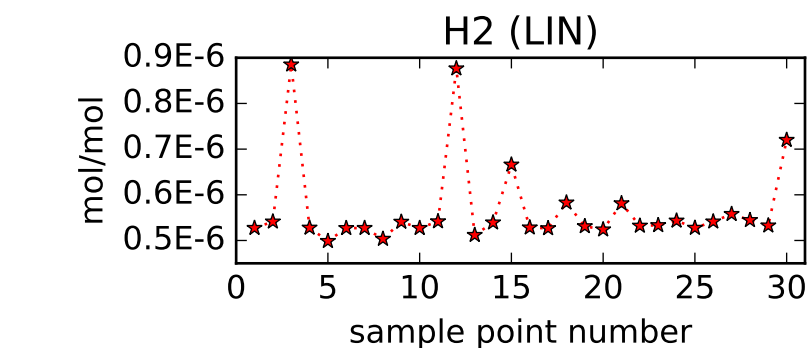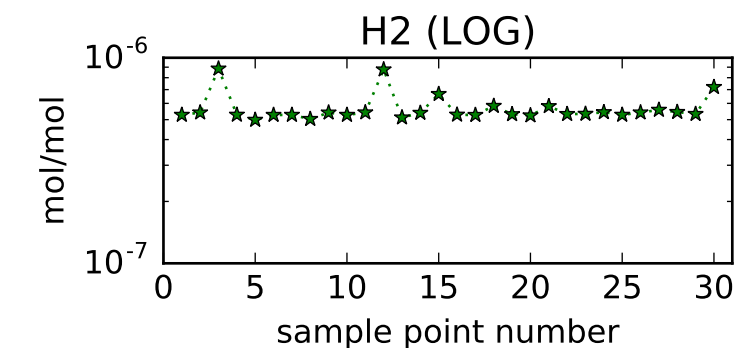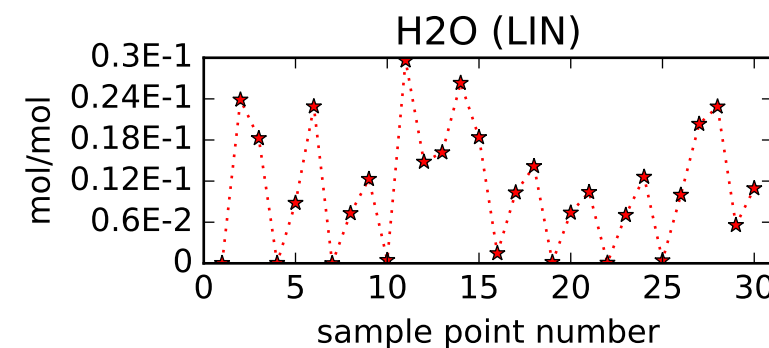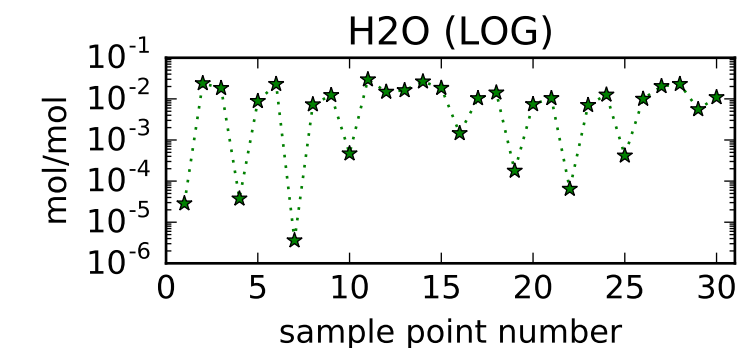

H2O2 (LIN)

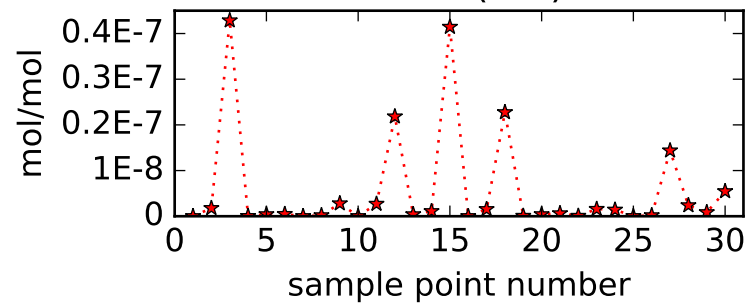

H2O2 (LOG)

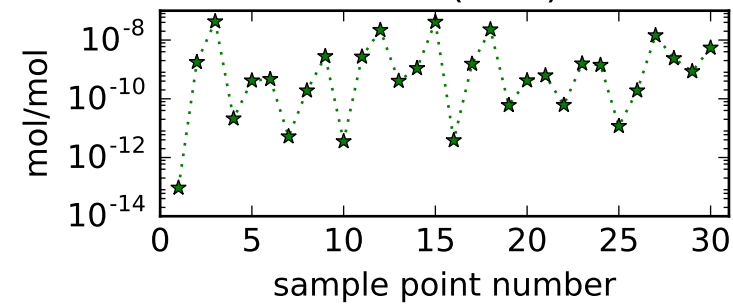

H2OH2O (LIN)

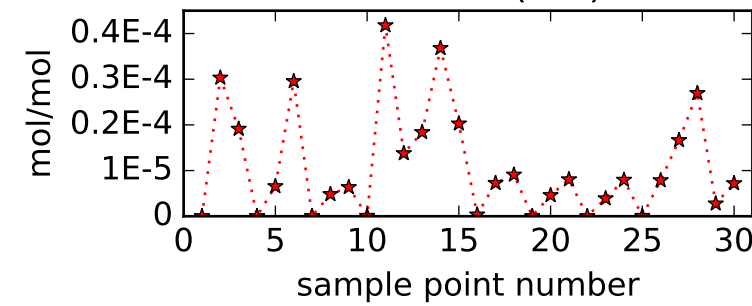

H2OH2O (LOG)

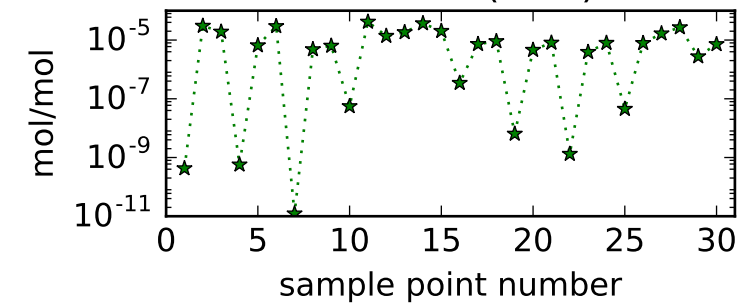

H2SO4 (LIN)

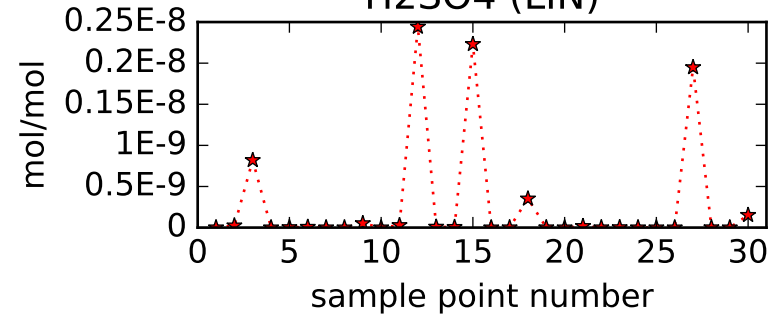

H2SO4 (LOG)

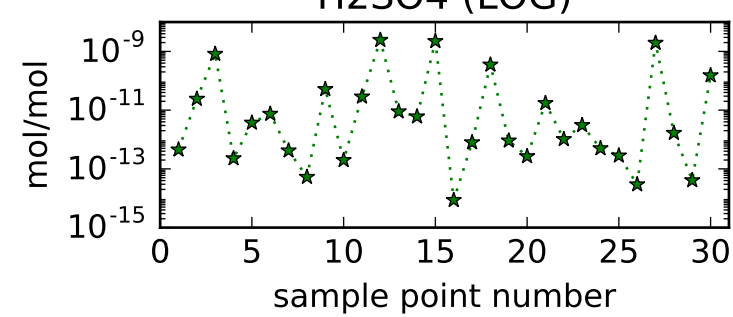

HBr (LIN)

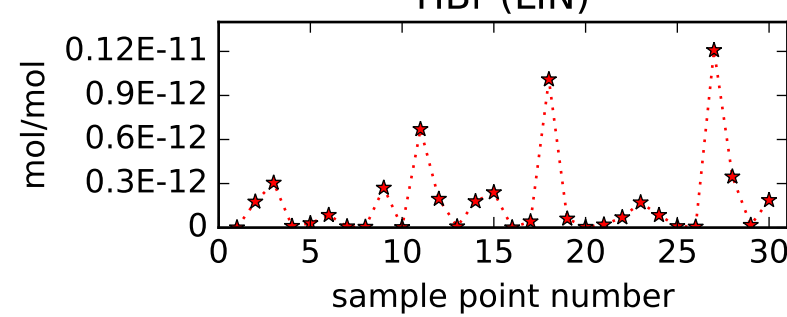

HBr (LOG)

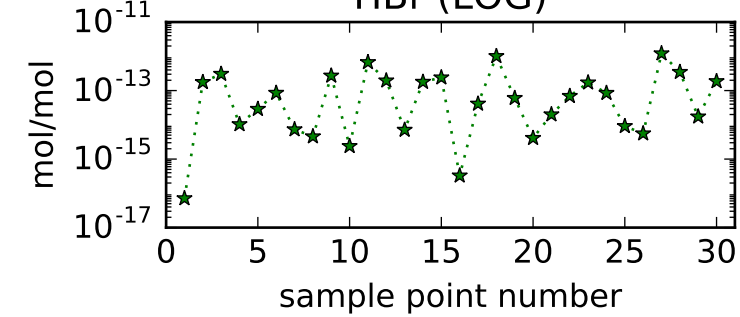

HCHO (LIN)

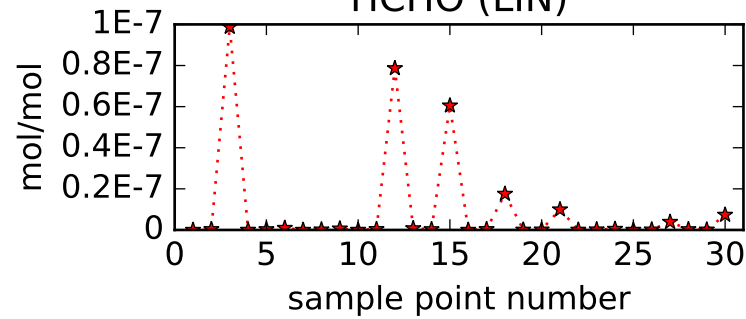

HCHO (LOG)

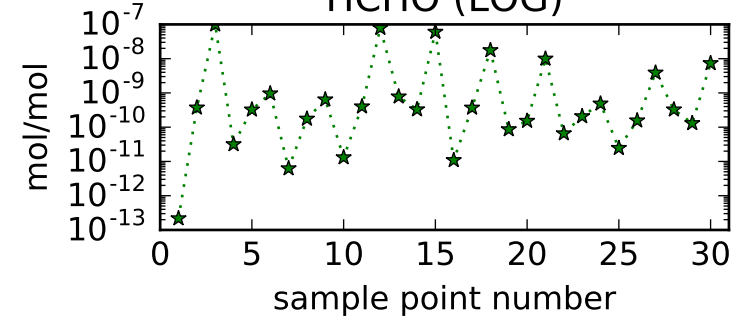

HCN (LIN)

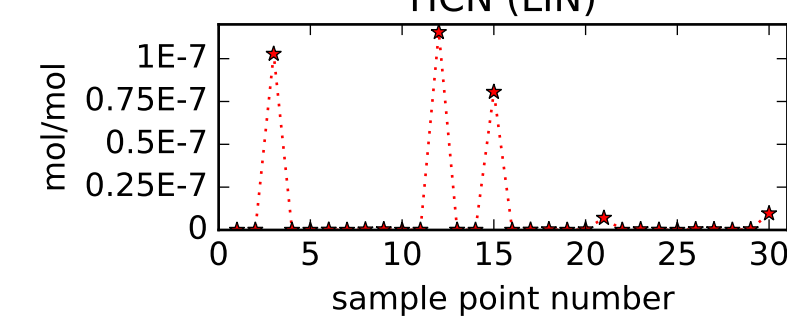

HCN (LOG)

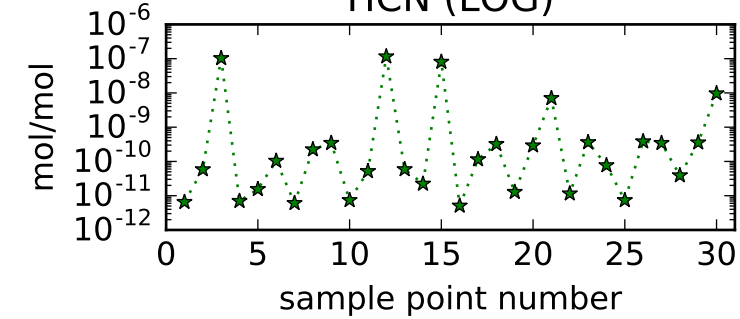

HCOC5 (LIN)

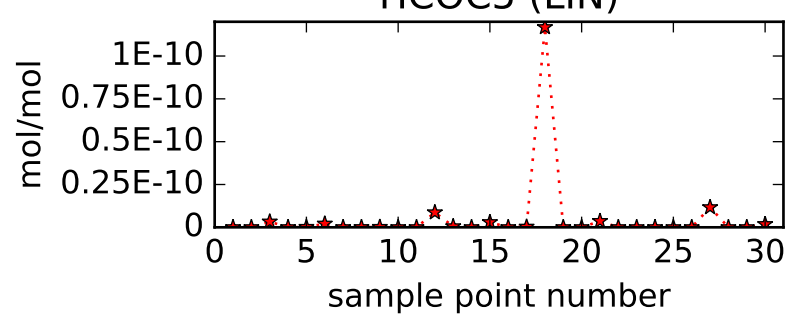

HCOC5 (LOG)

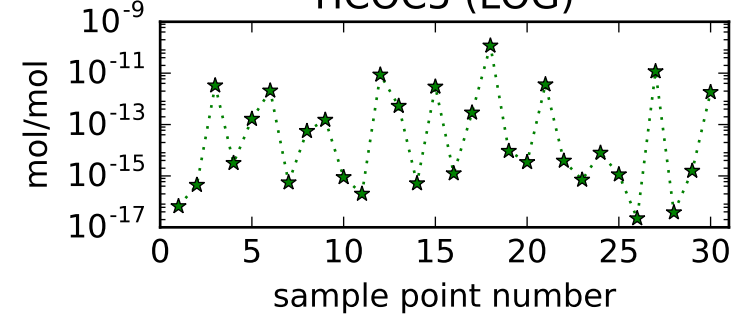

HCOCCH3CHOOH (LIN)

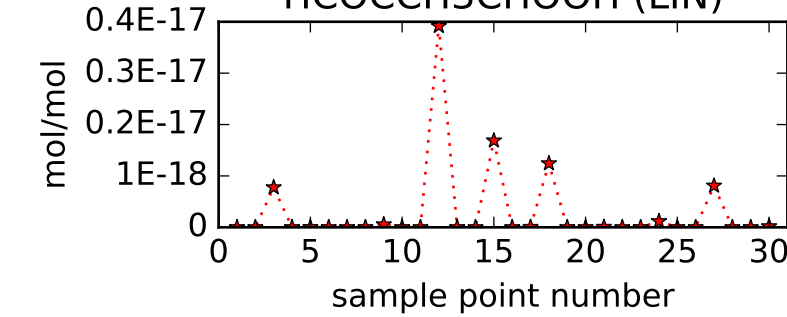

HCOCCH3CHOOH (LOG)

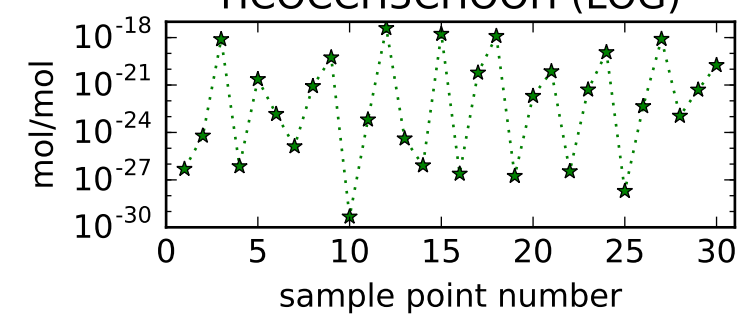

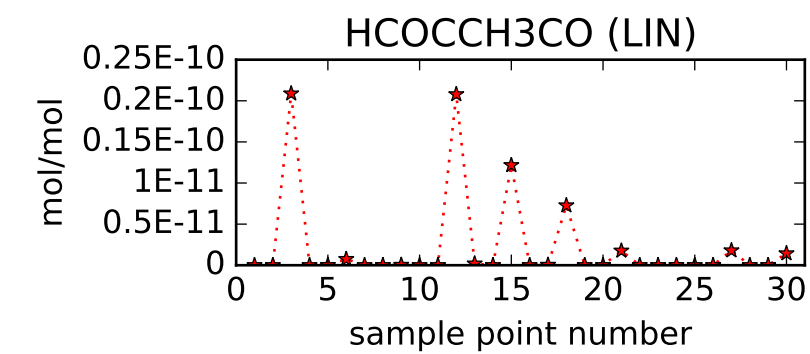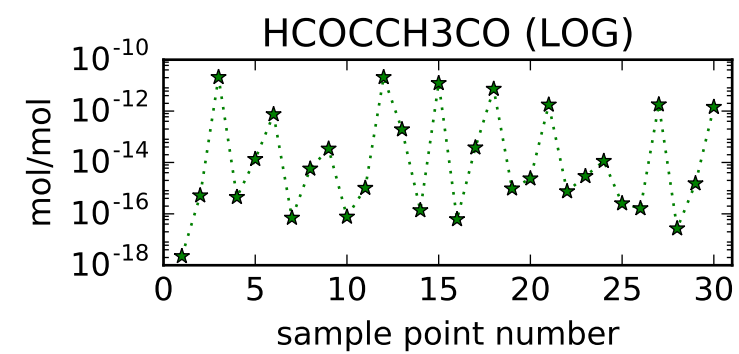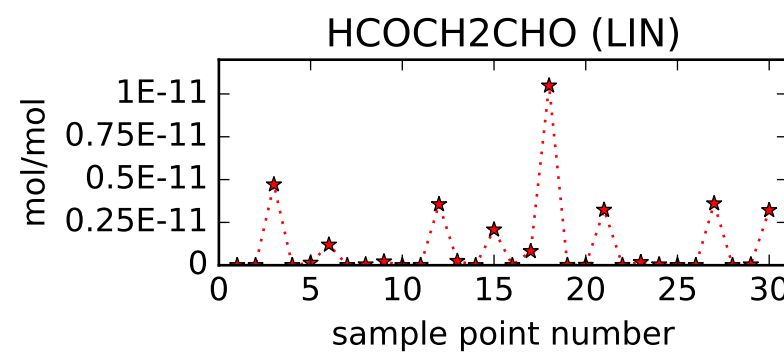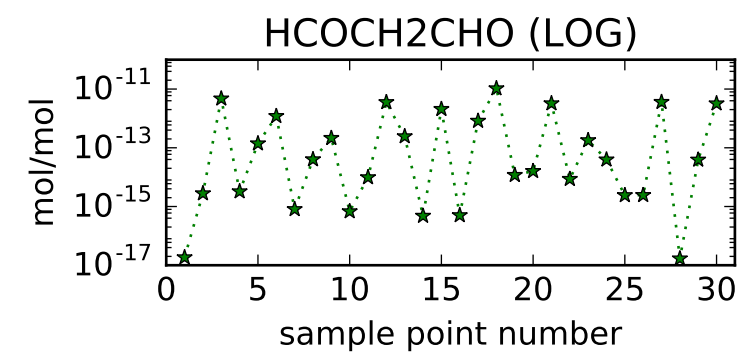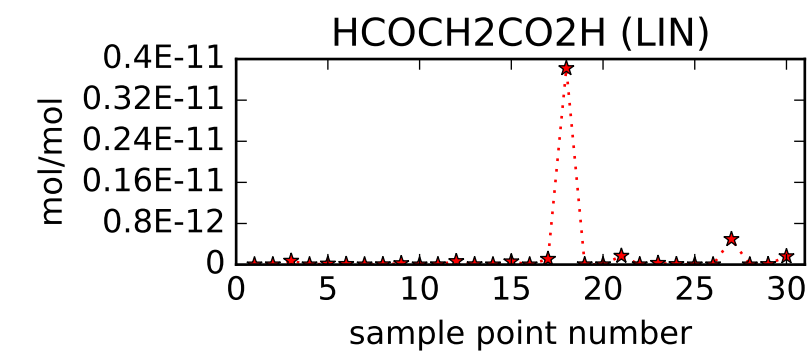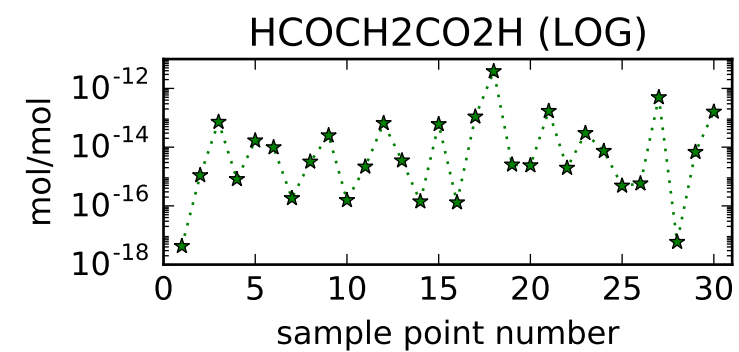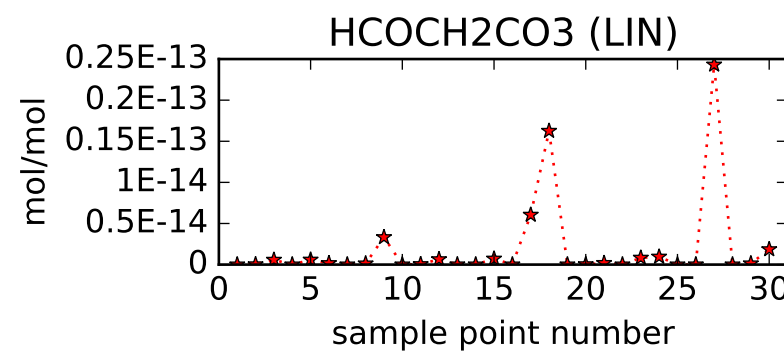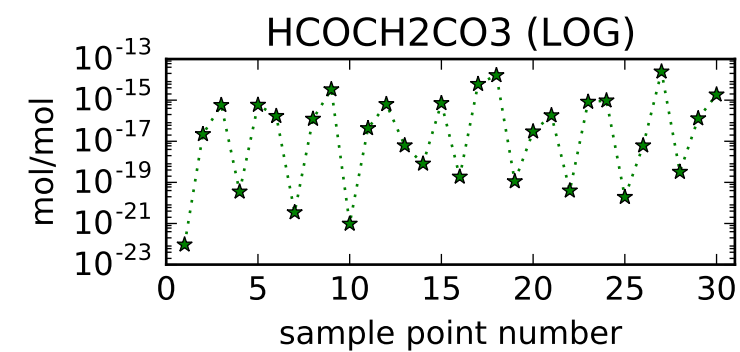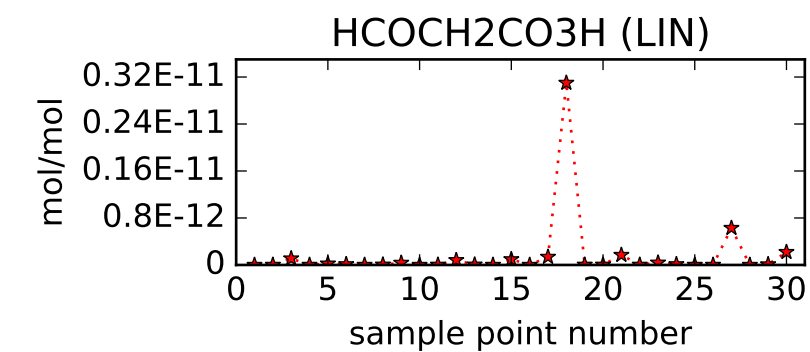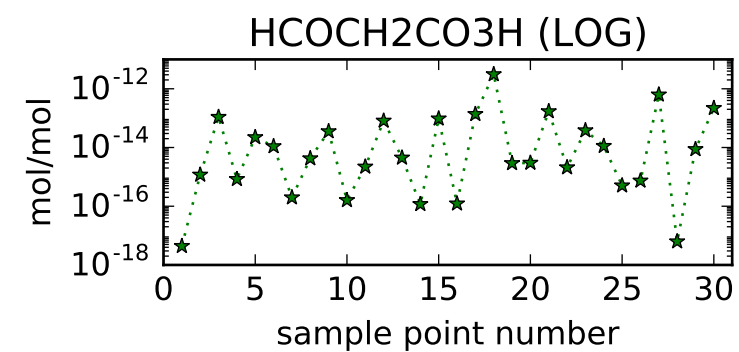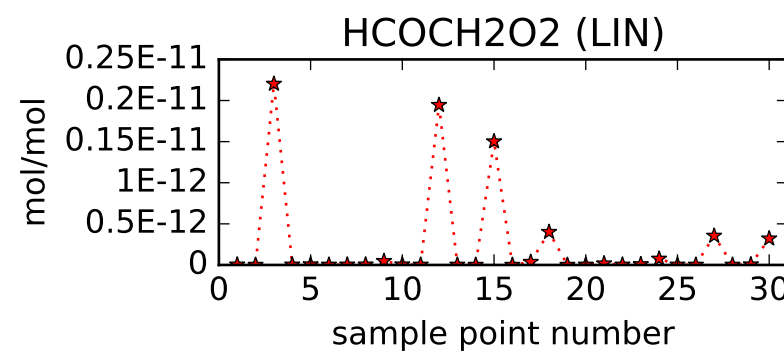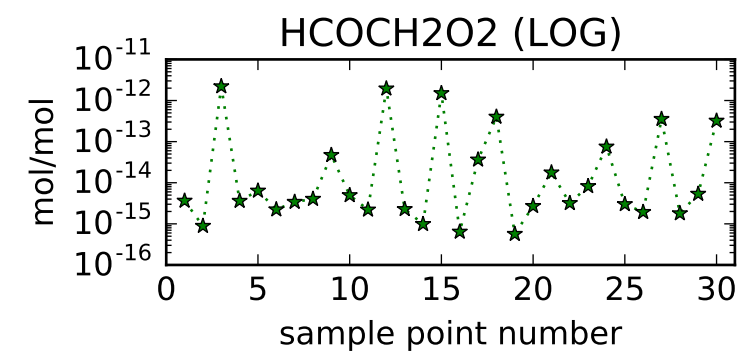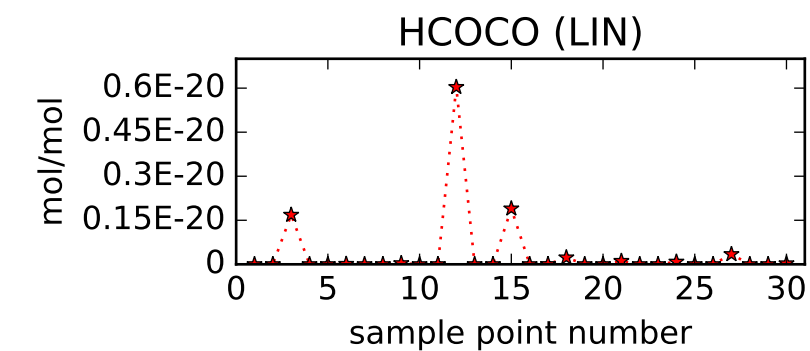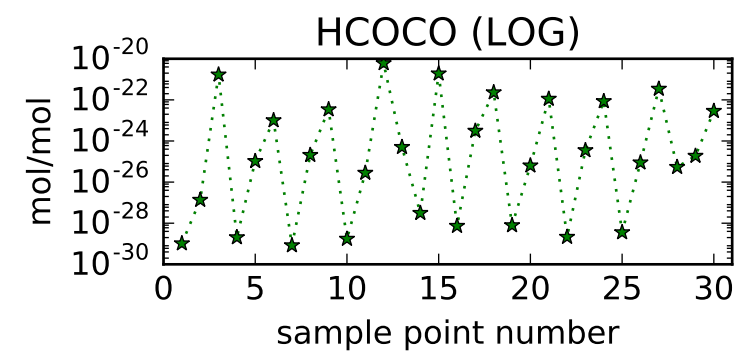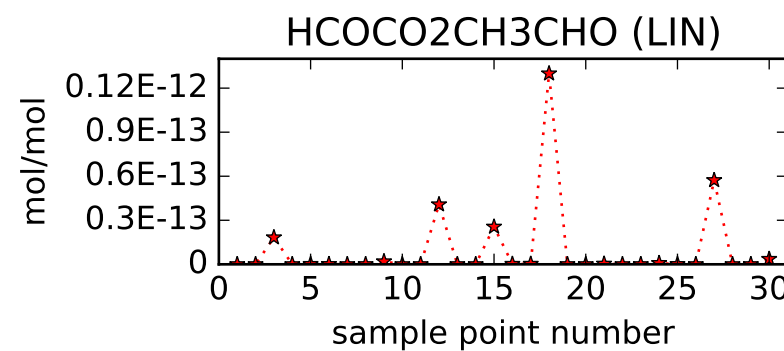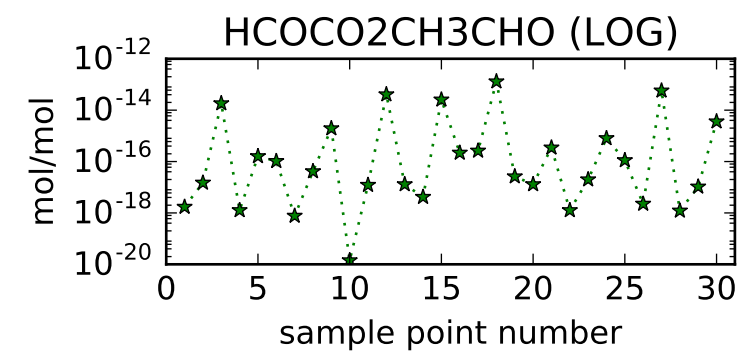

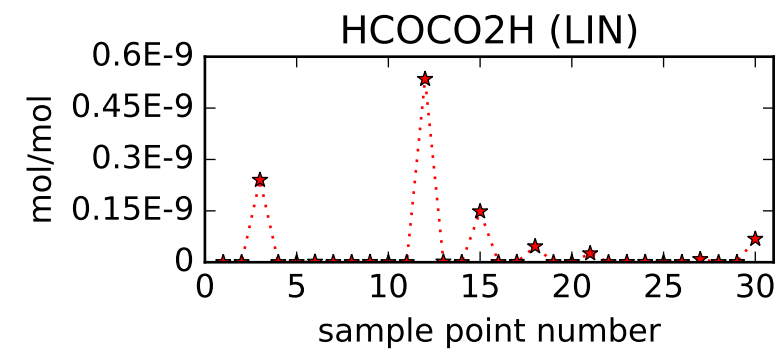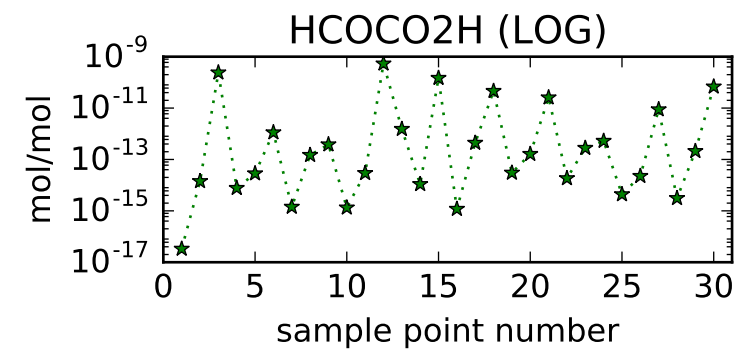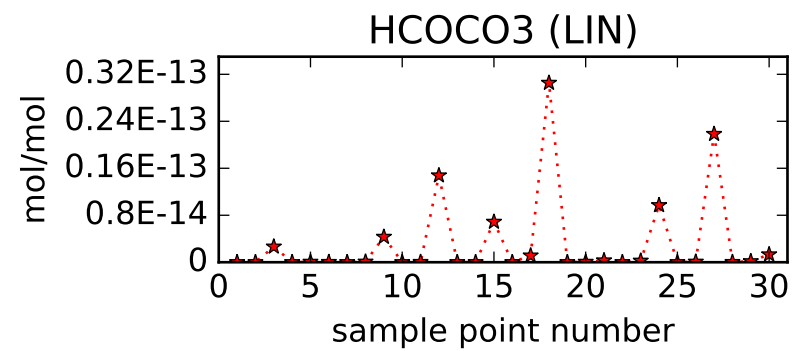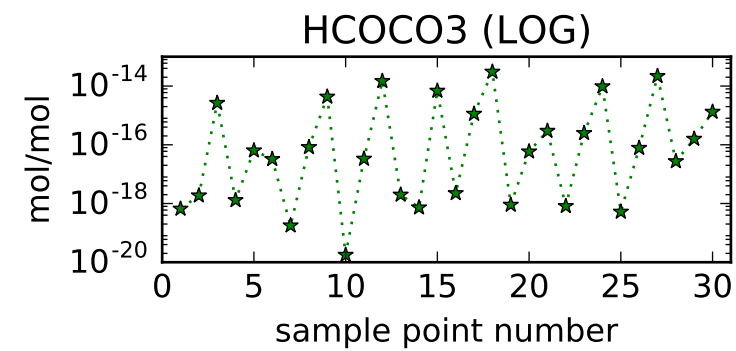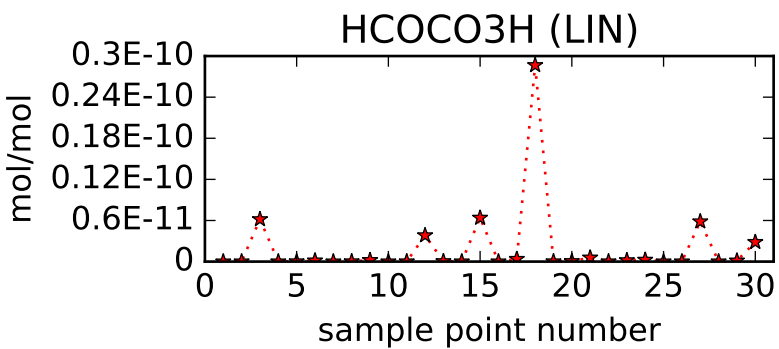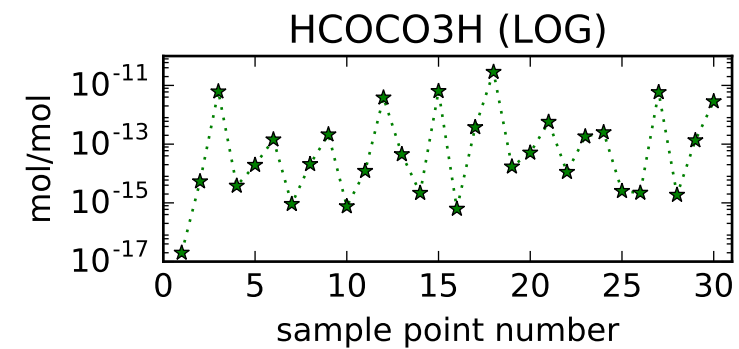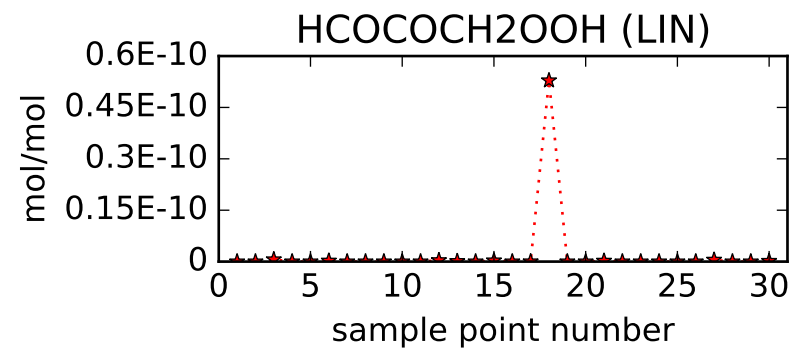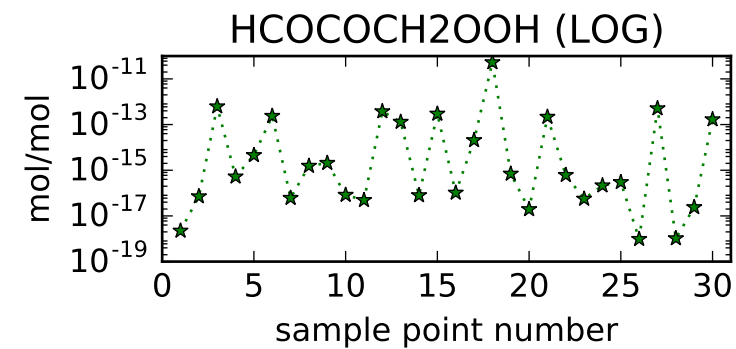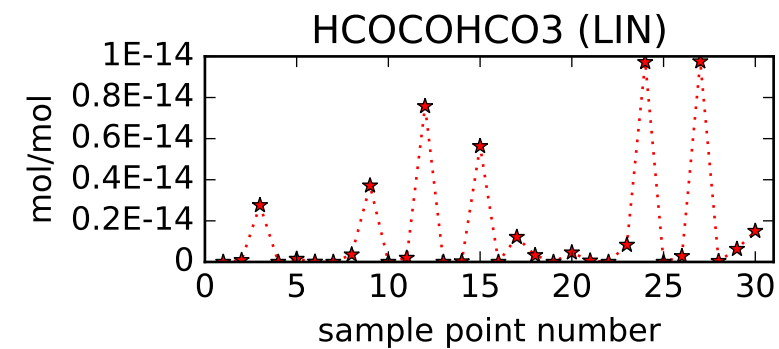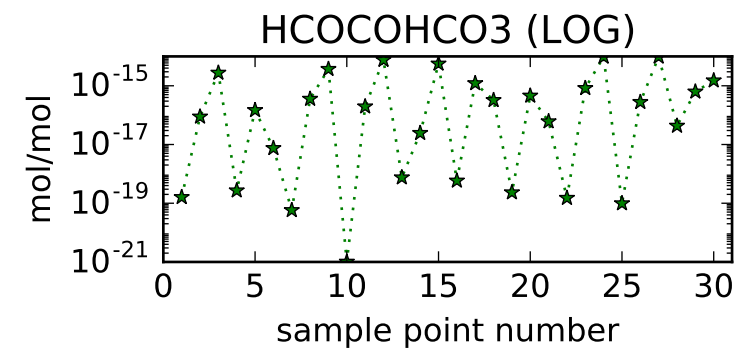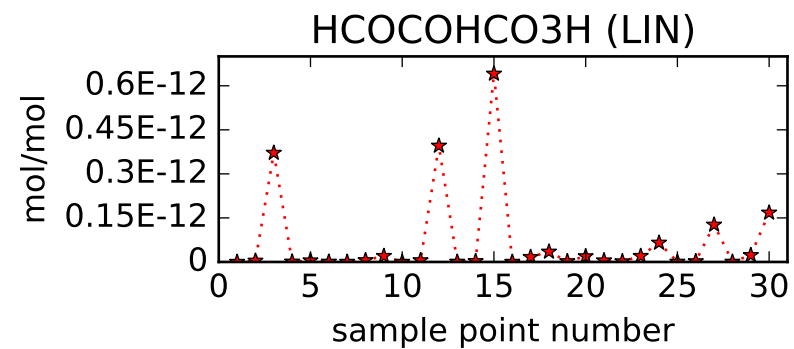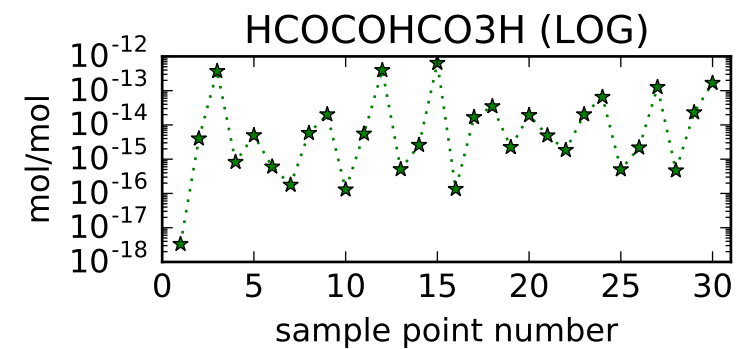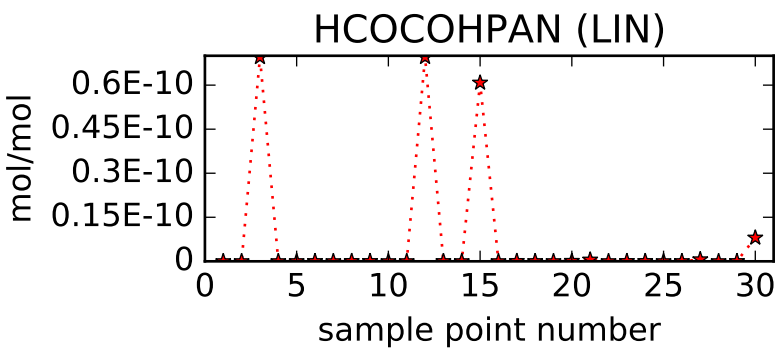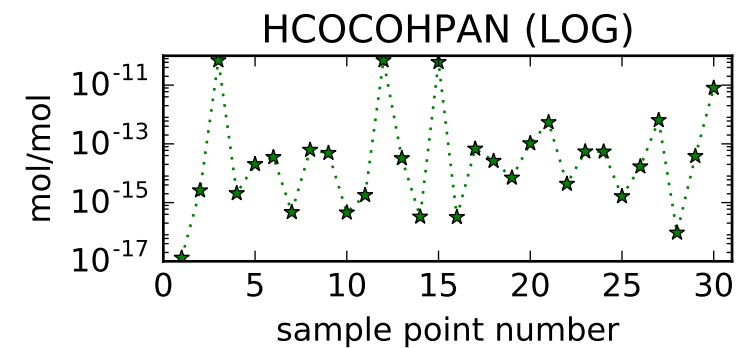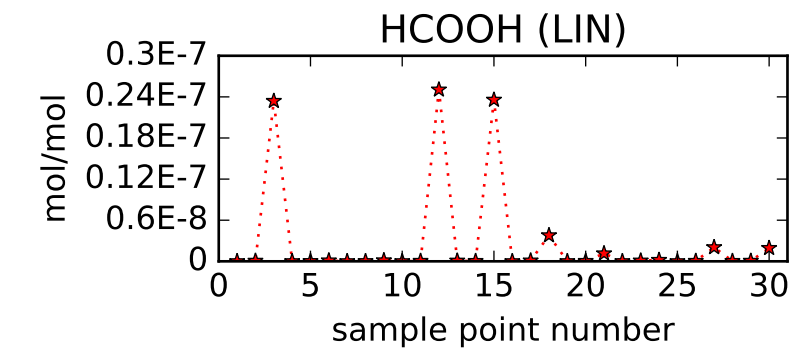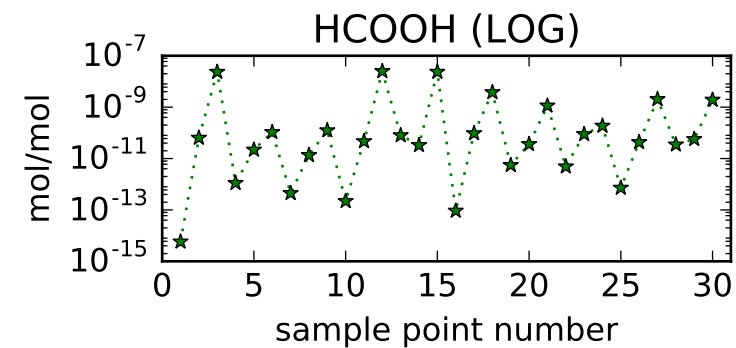



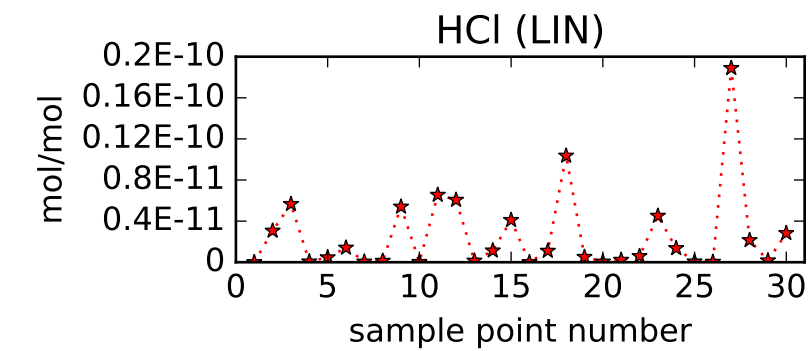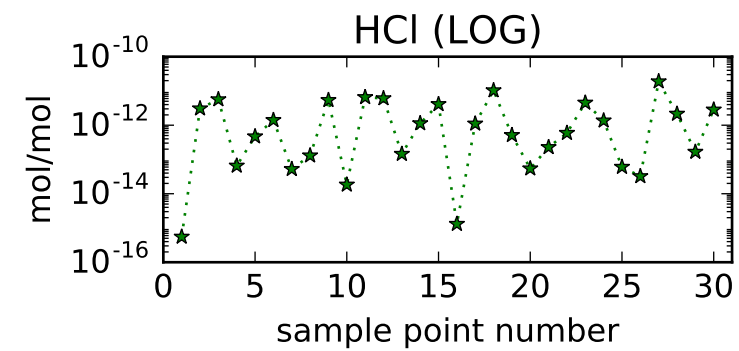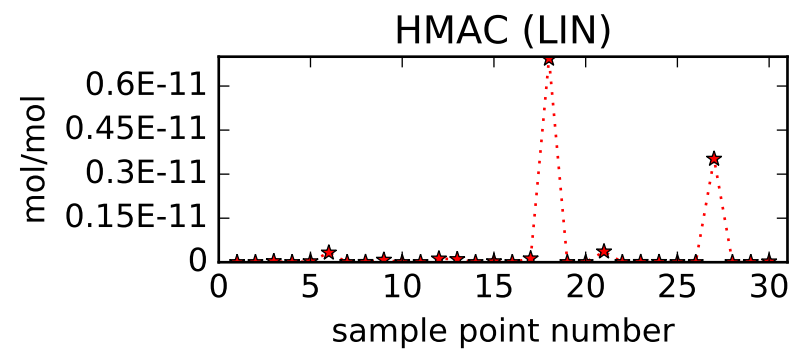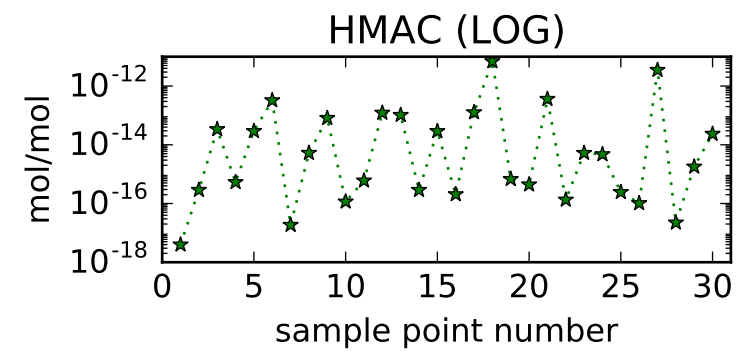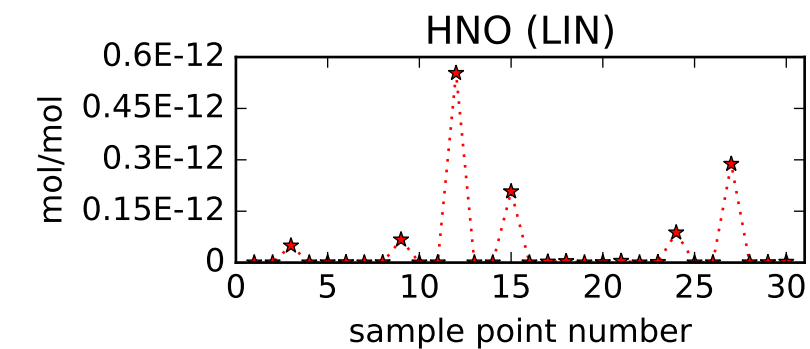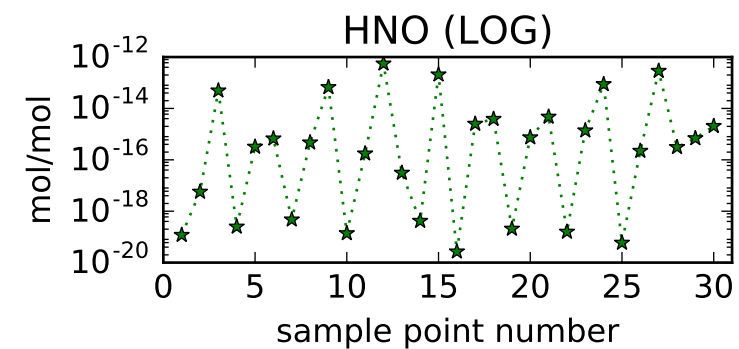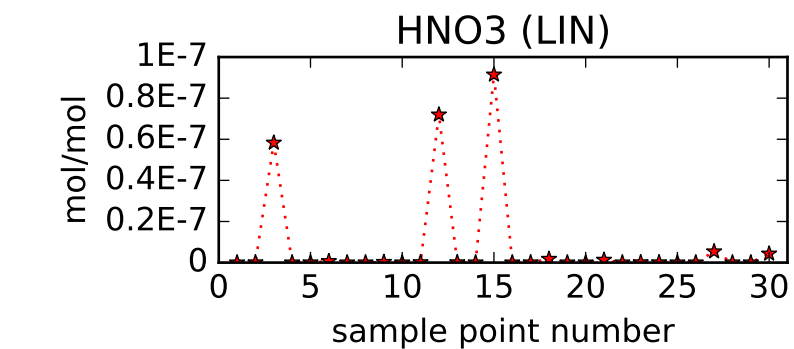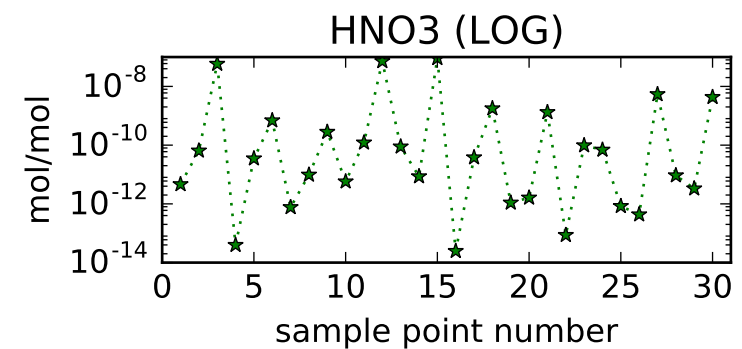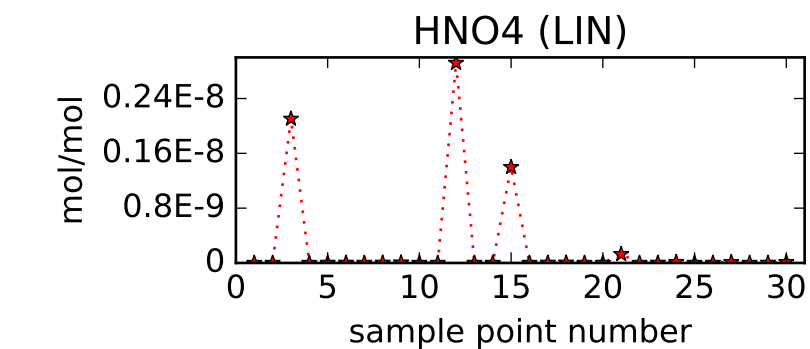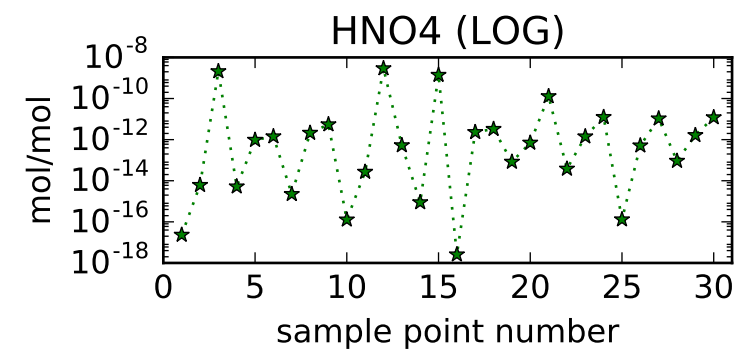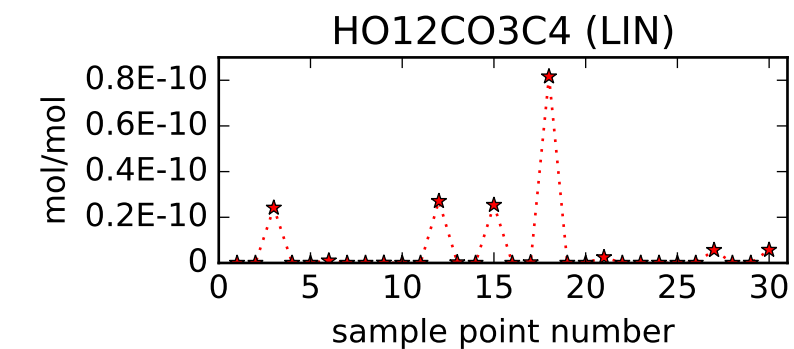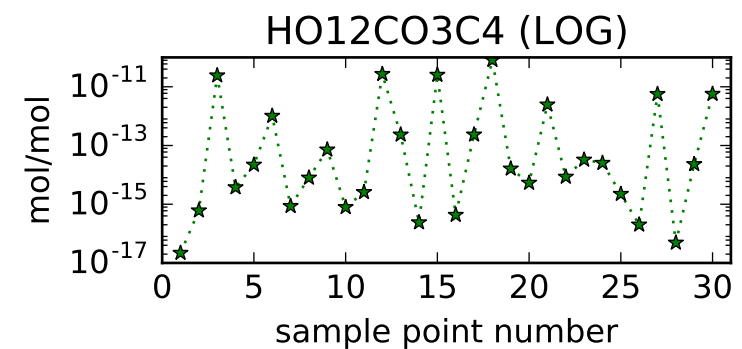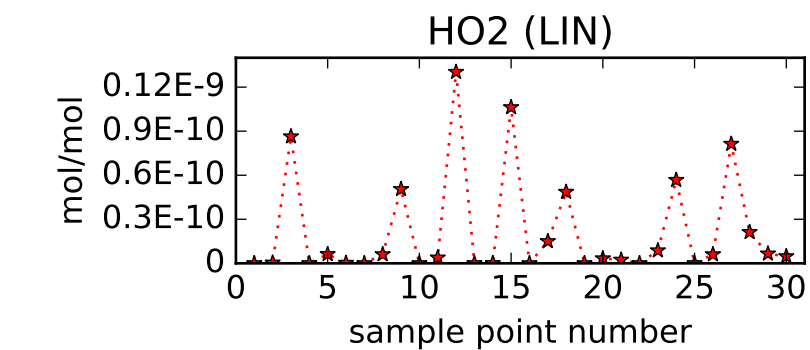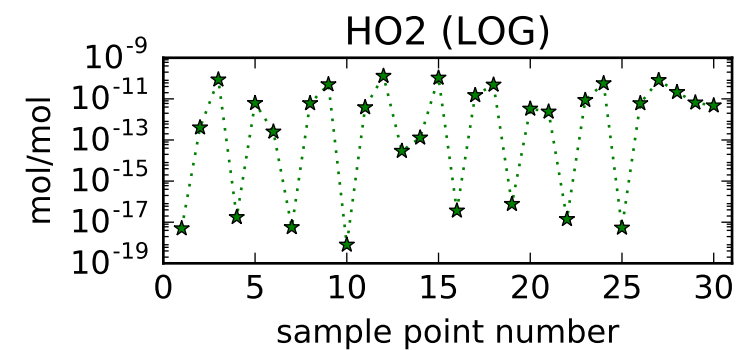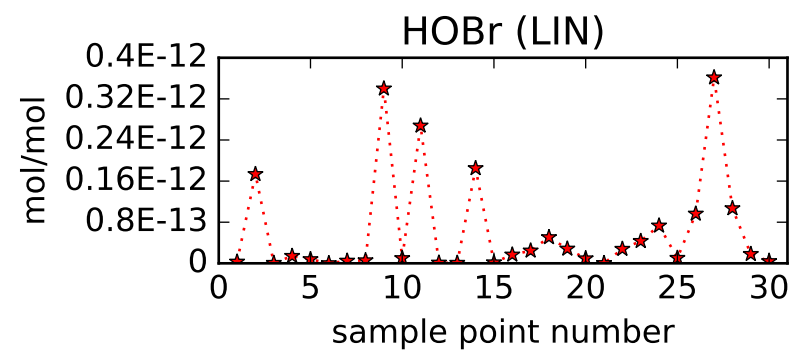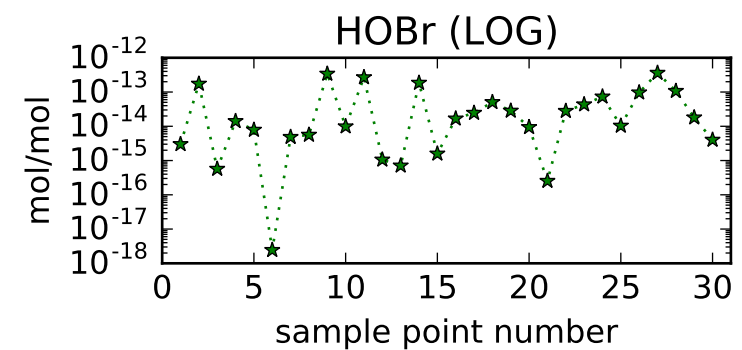

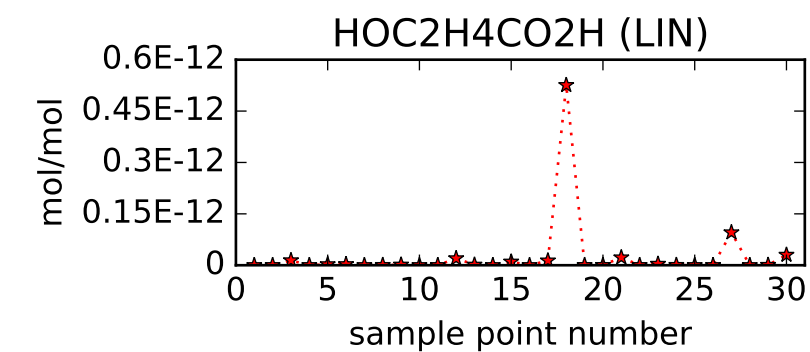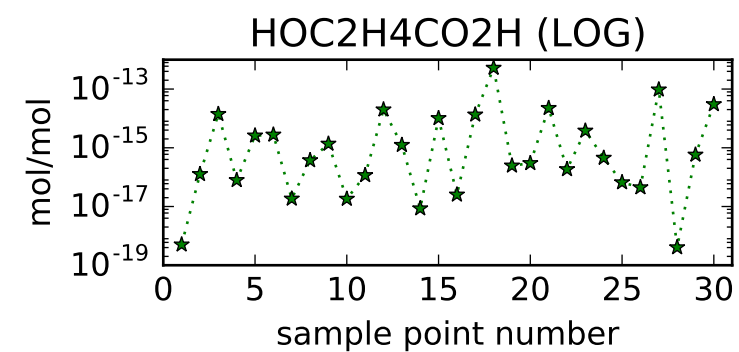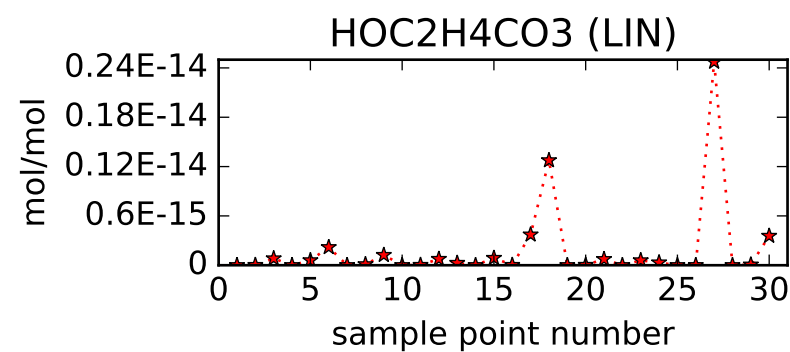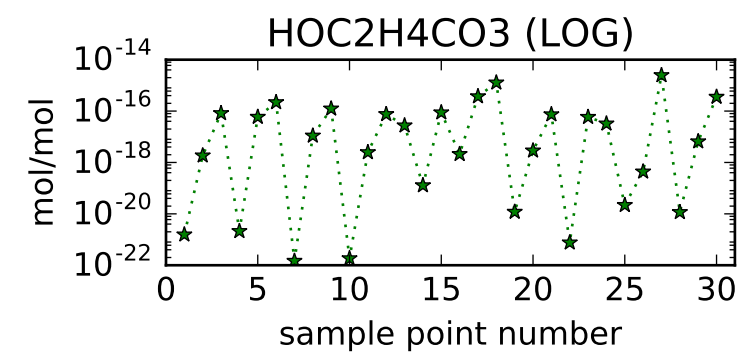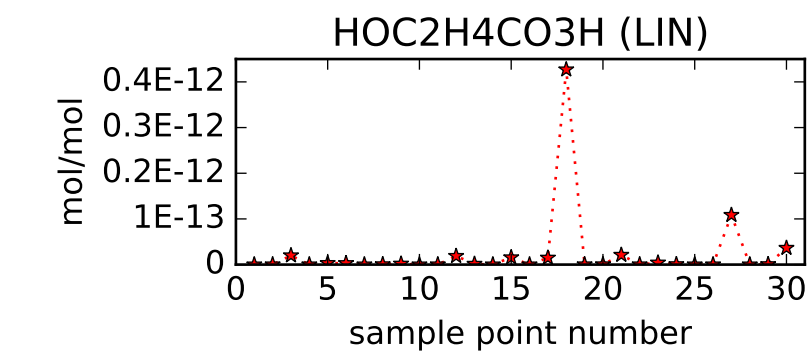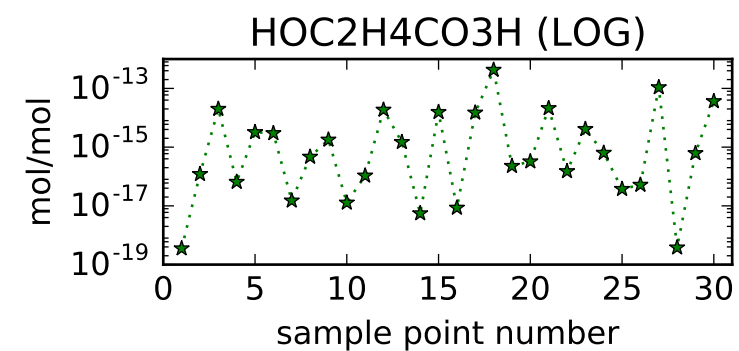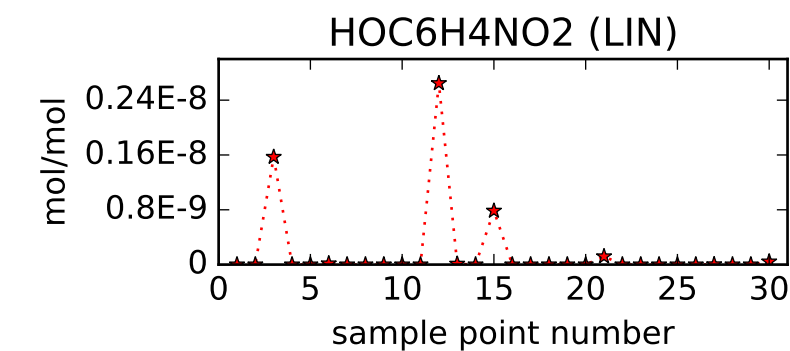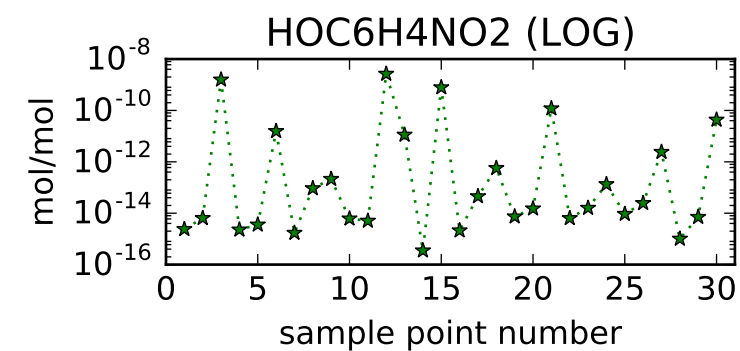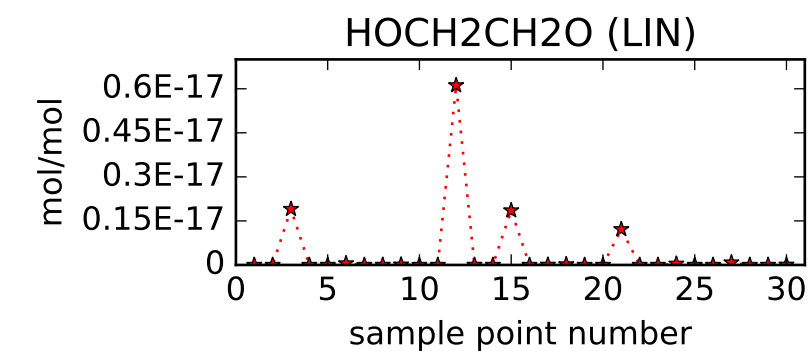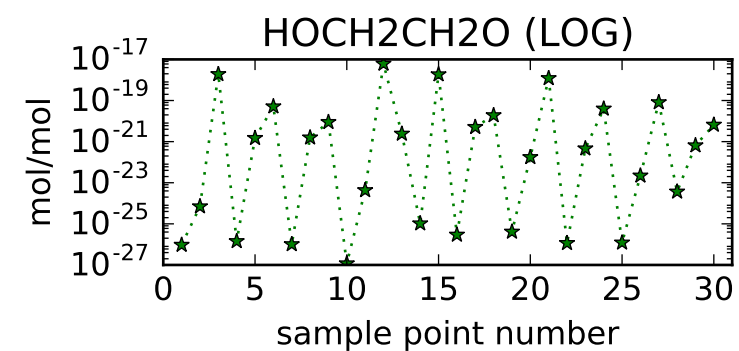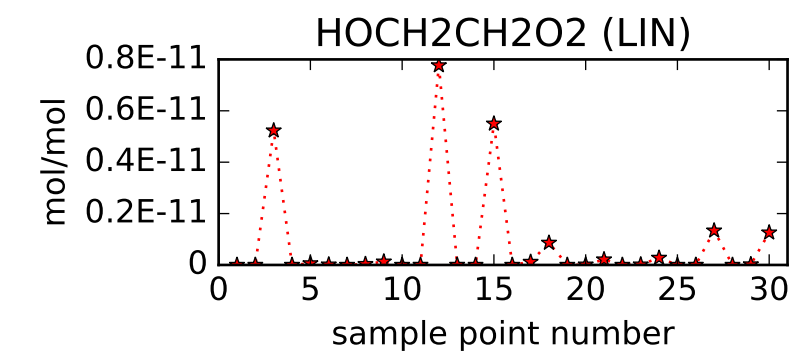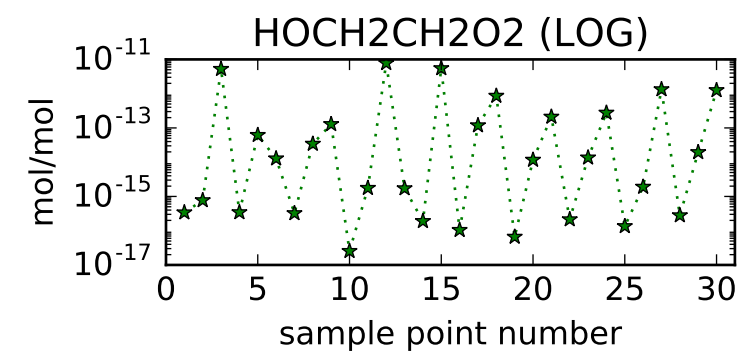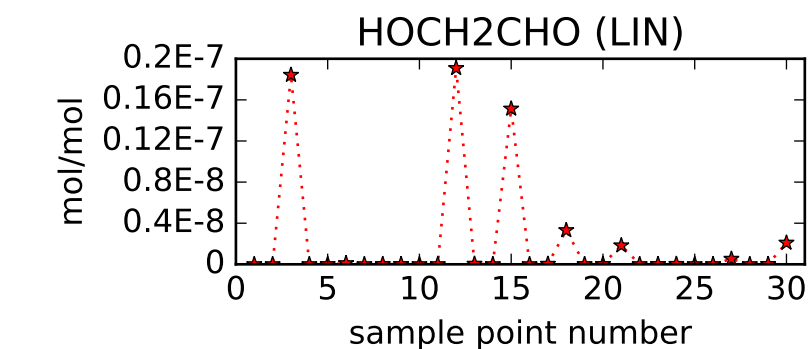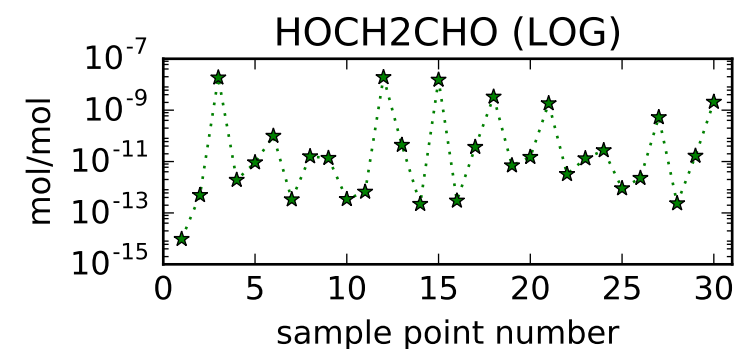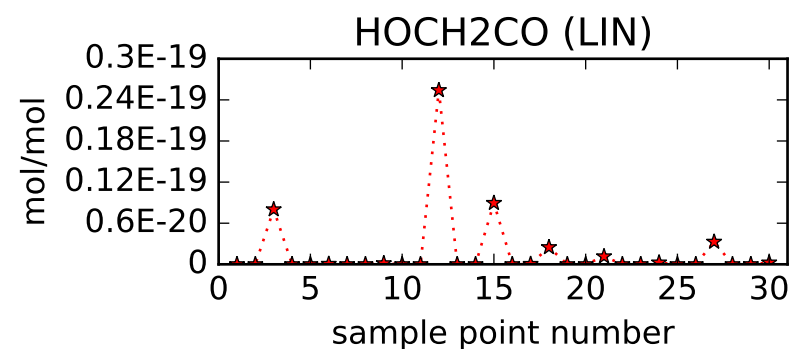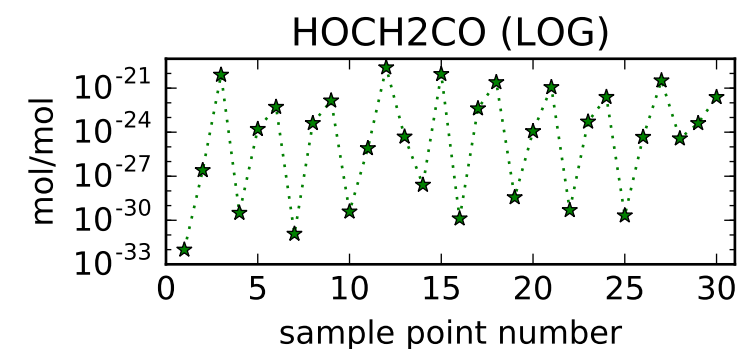

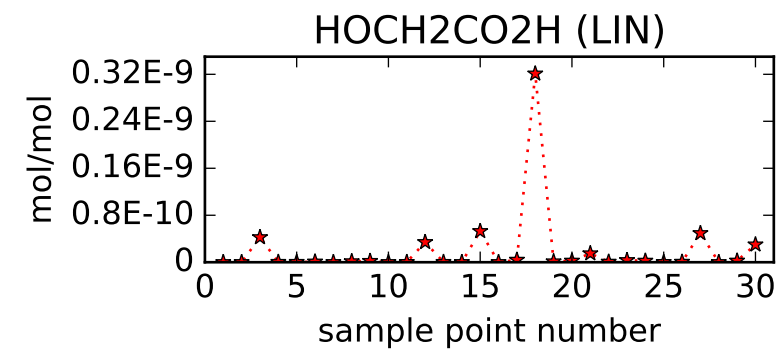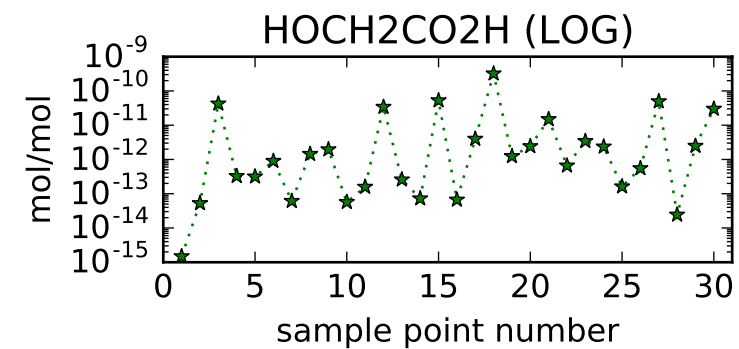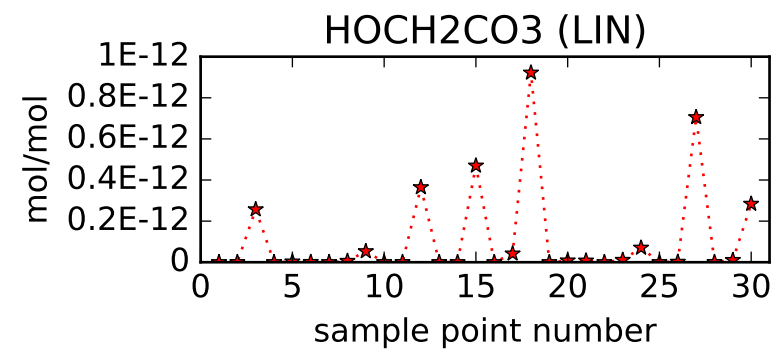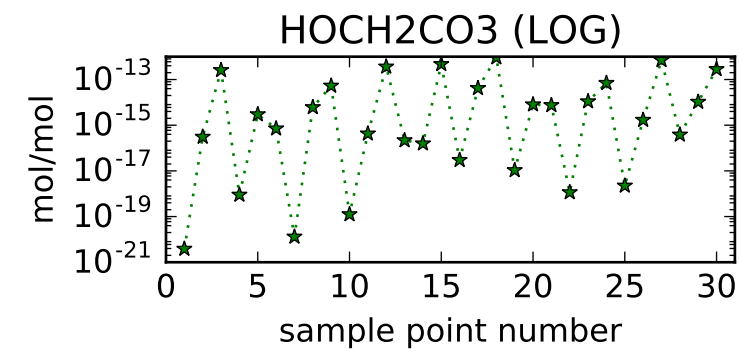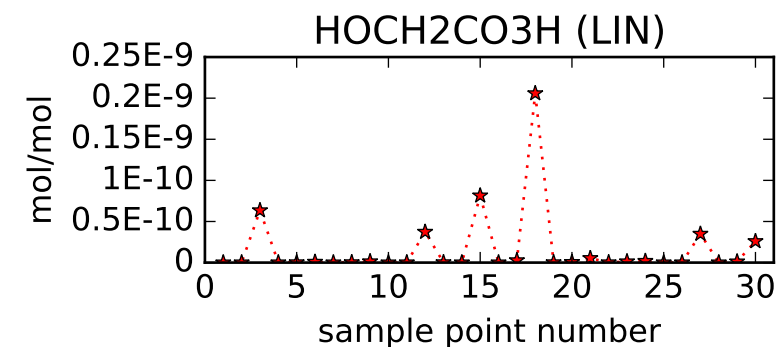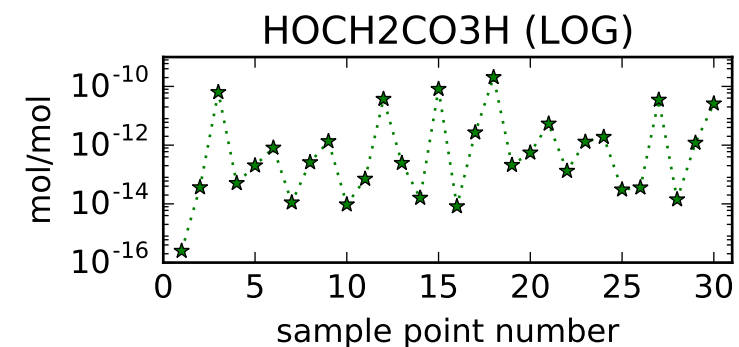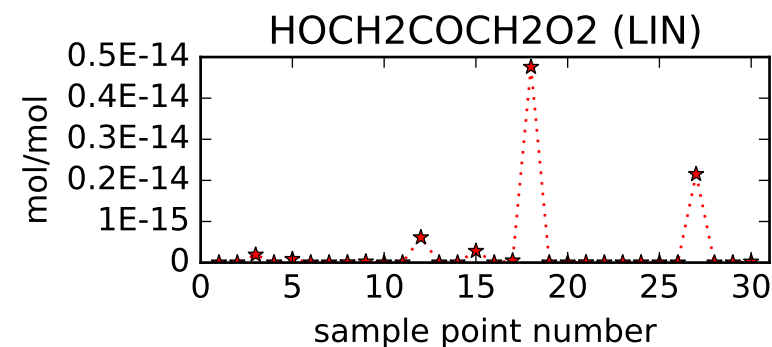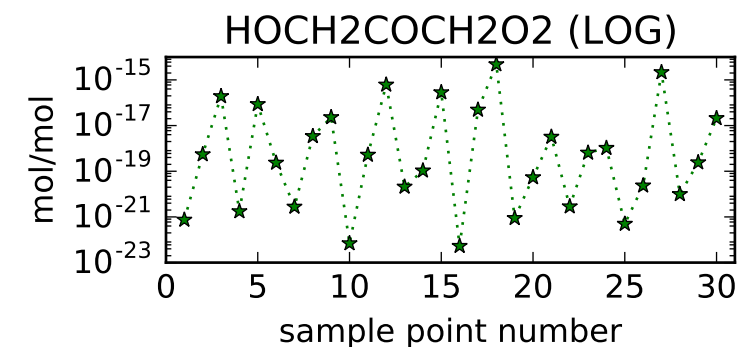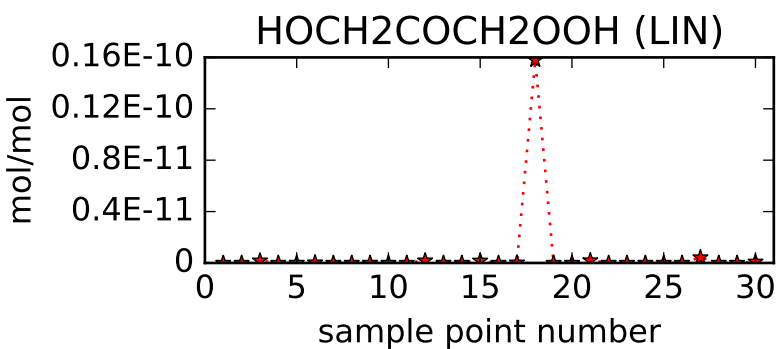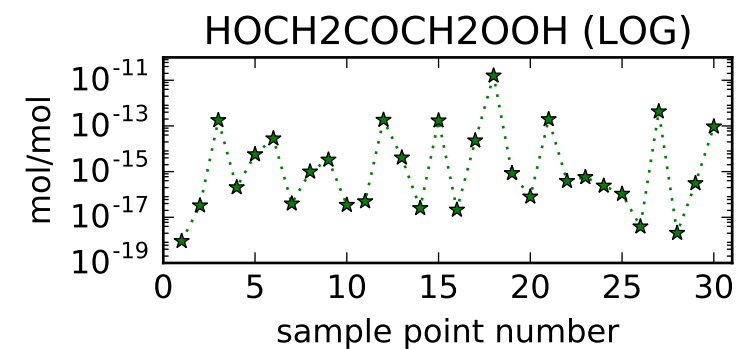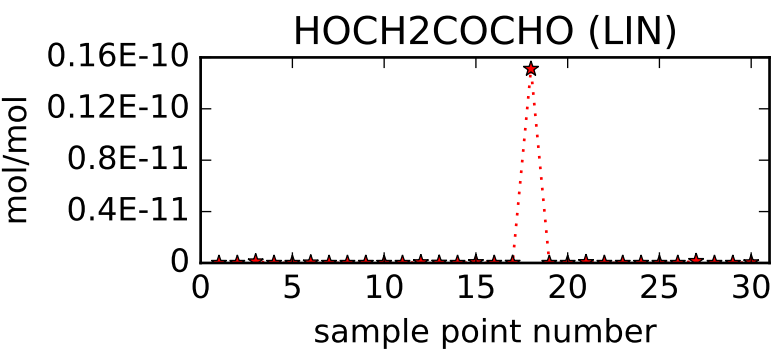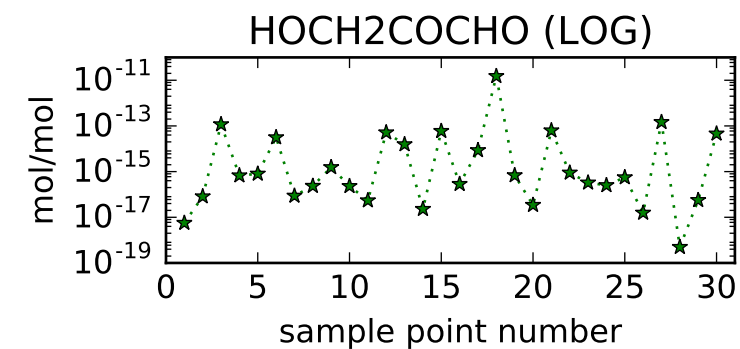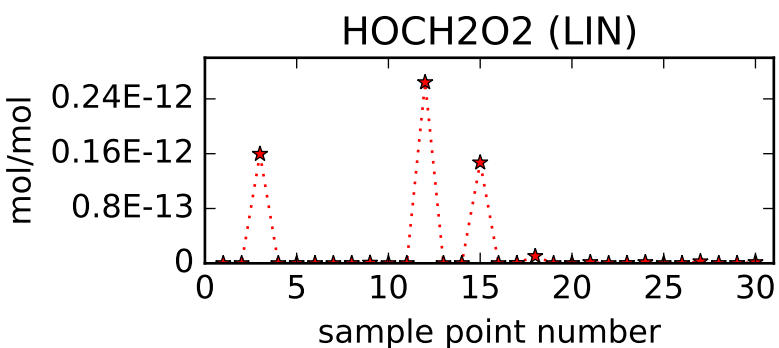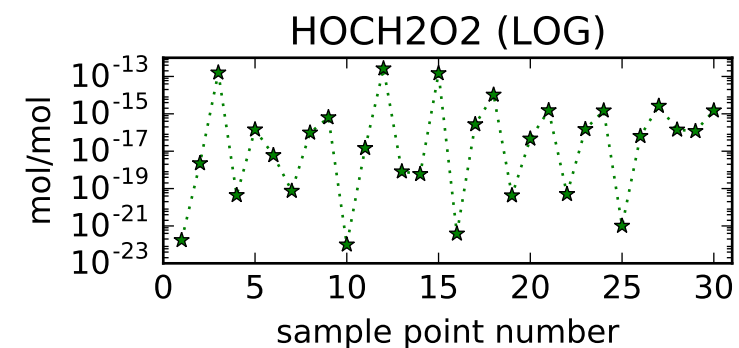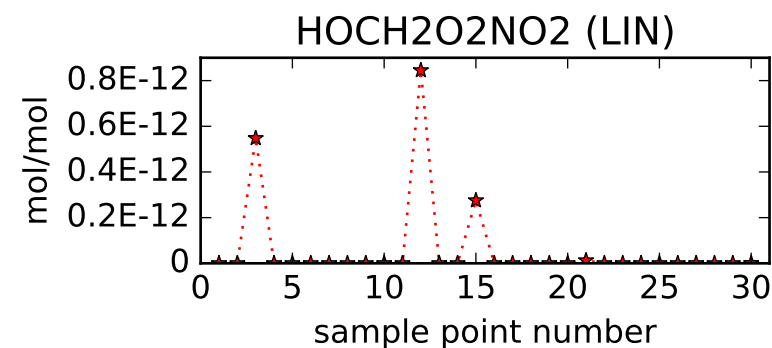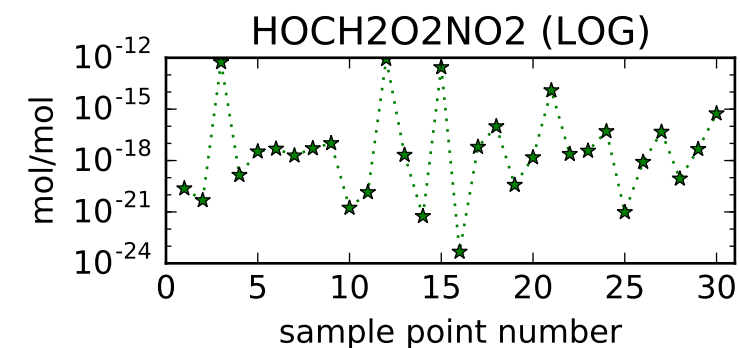

HOCH<sub>2</sub>OH (LIN)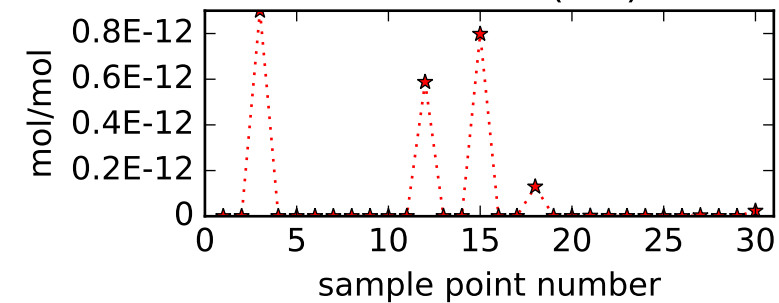HOCH<sub>2</sub>OH (LOG)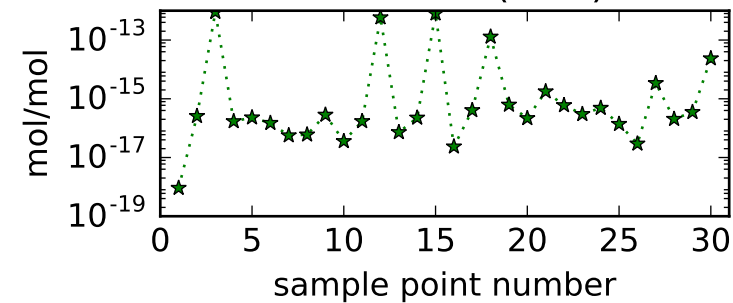HOCH<sub>2</sub>OOH (LIN)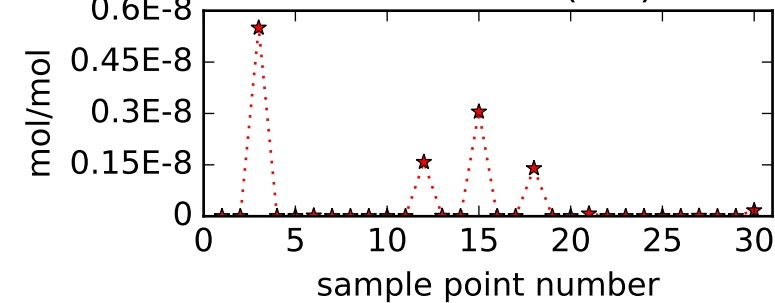HOCH<sub>2</sub>OOH (LOG)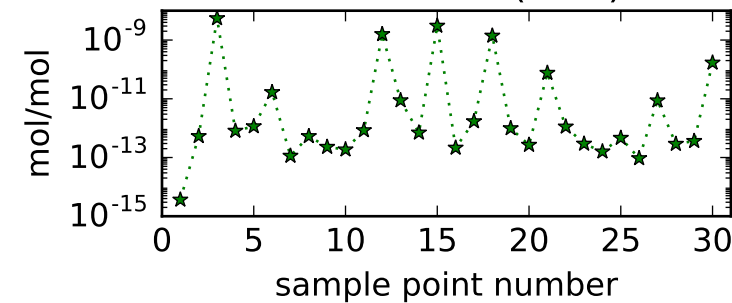

HOCHCHO (LIN)

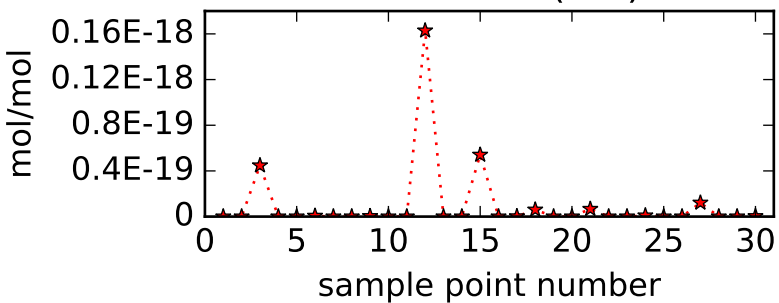

HOCHCHO (LOG)

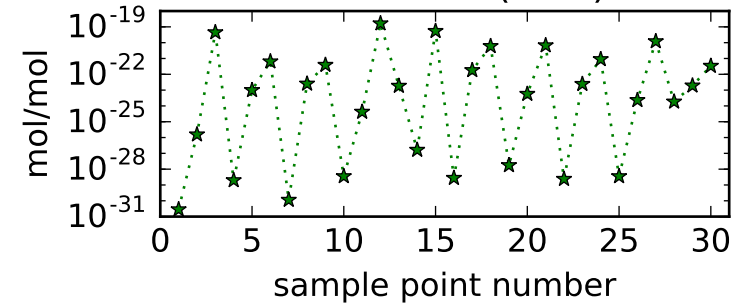HOCOC<sub>4</sub>DIAL (LIN)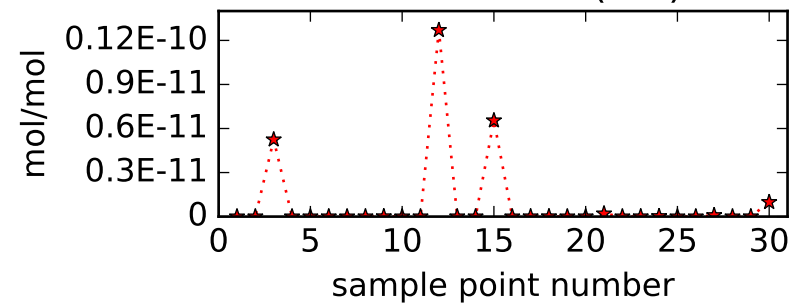HOCOC<sub>4</sub>DIAL (LOG)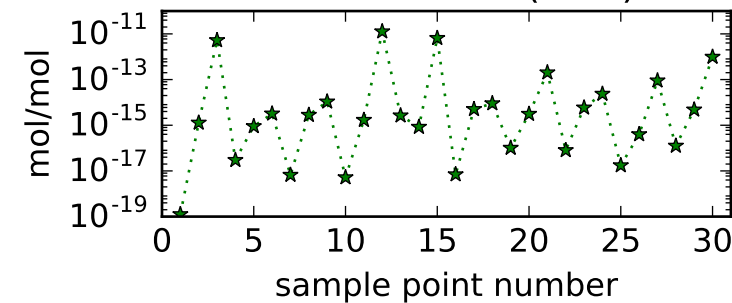

HOCl (LIN)

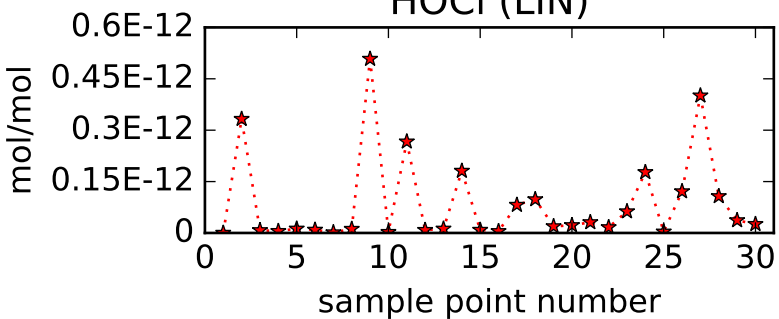

HOCl (LOG)

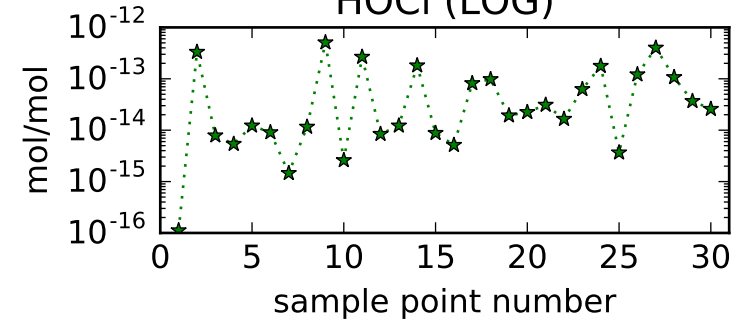

HONO (LIN)

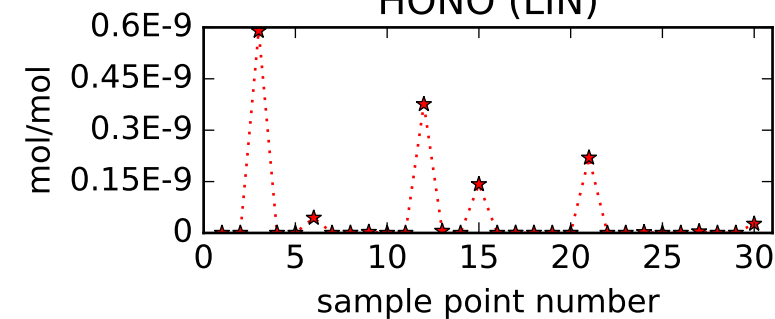

HONO (LOG)

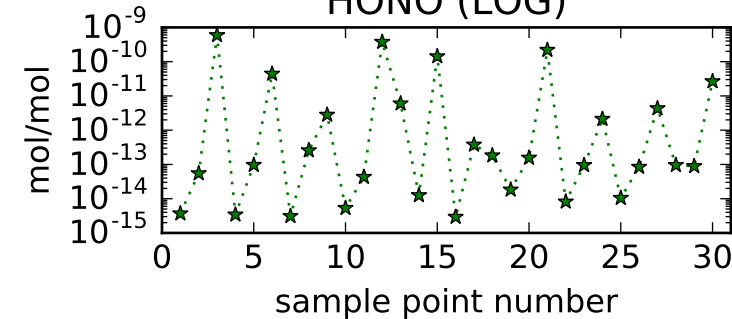HOOCH<sub>2</sub>CHO (LIN)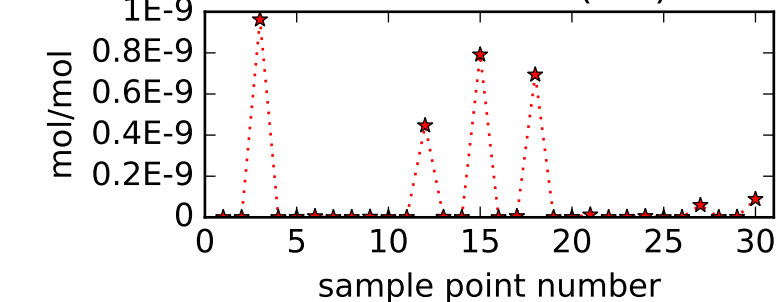HOOCH<sub>2</sub>CHO (LOG)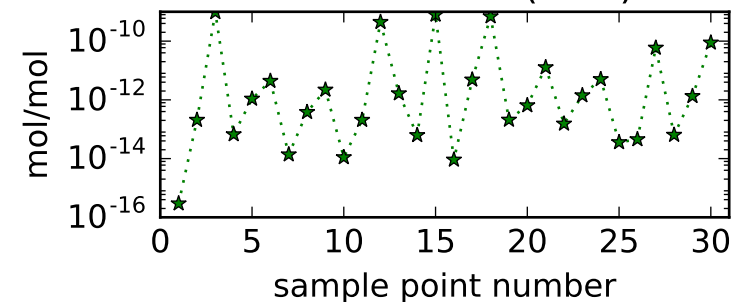HOOCH<sub>2</sub>CO<sub>2</sub>H (LIN)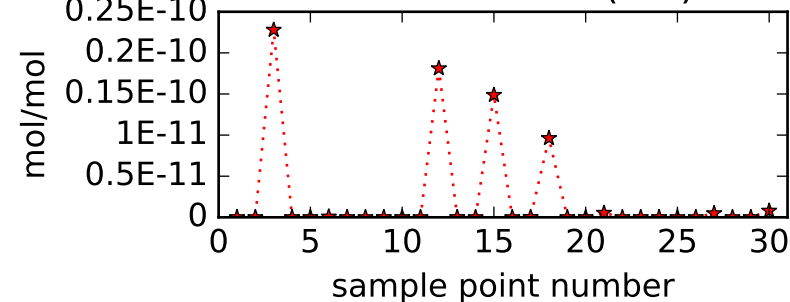HOOCH<sub>2</sub>CO<sub>2</sub>H (LOG)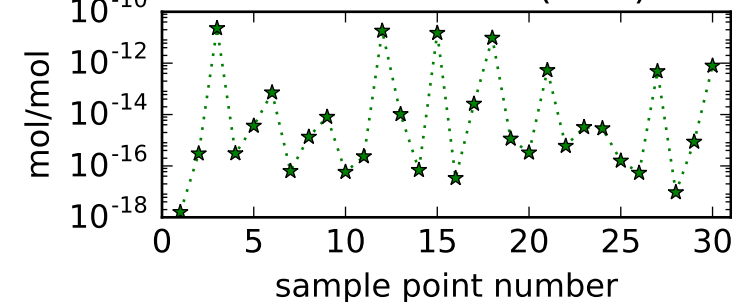

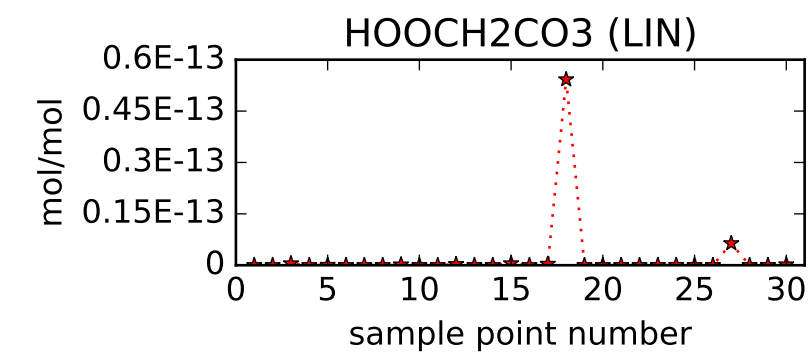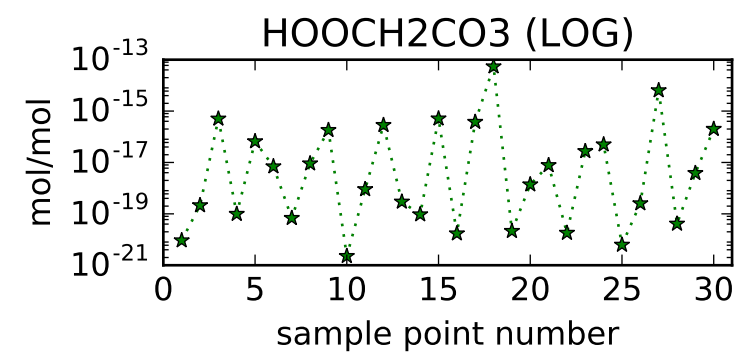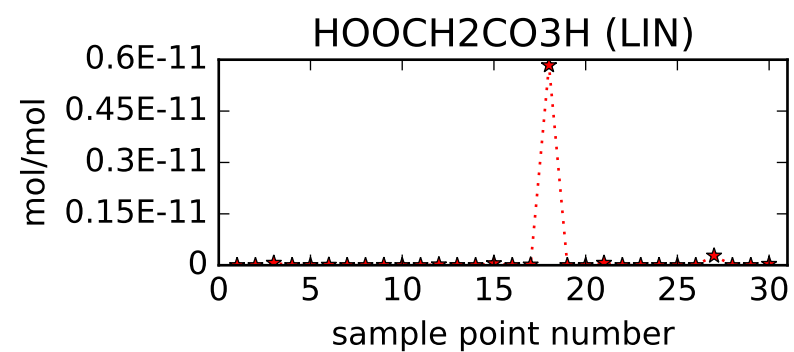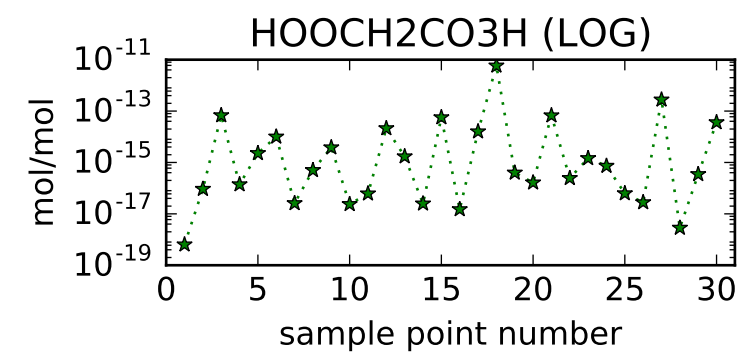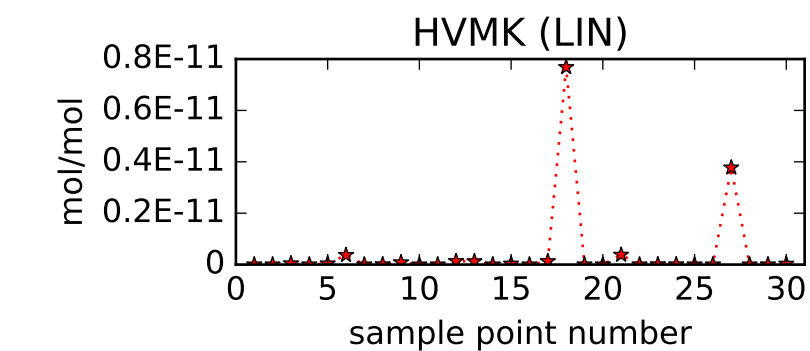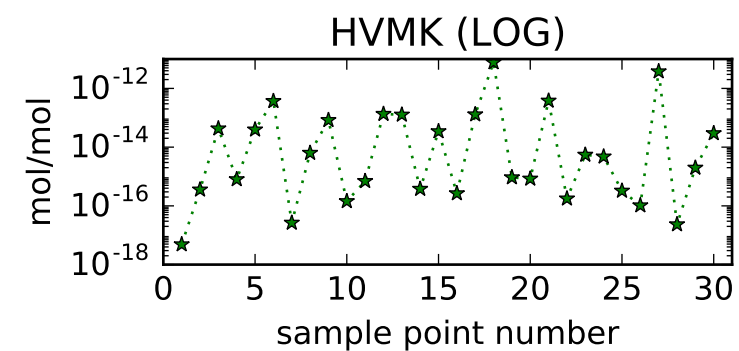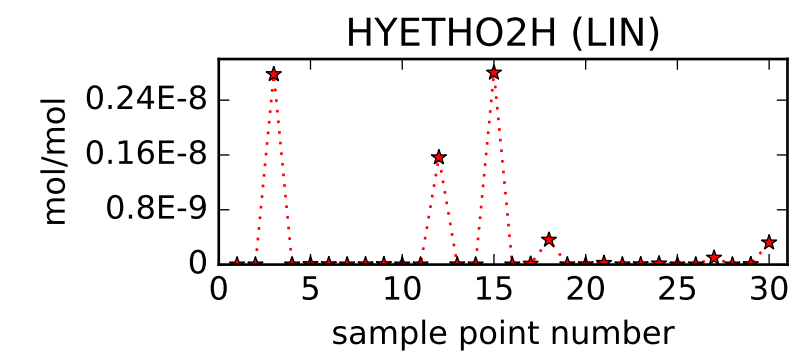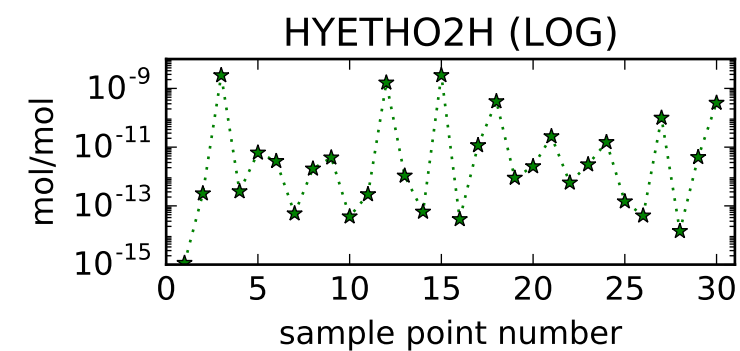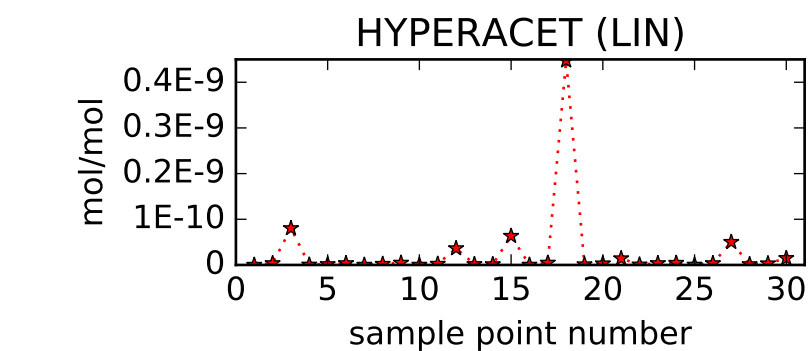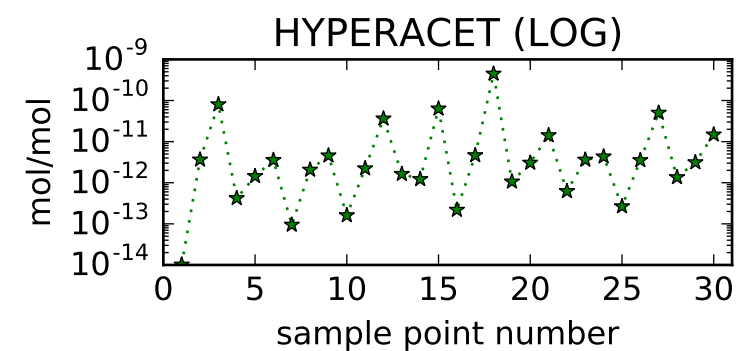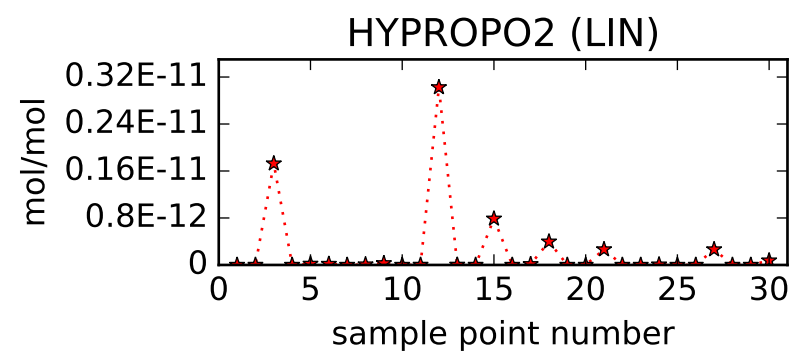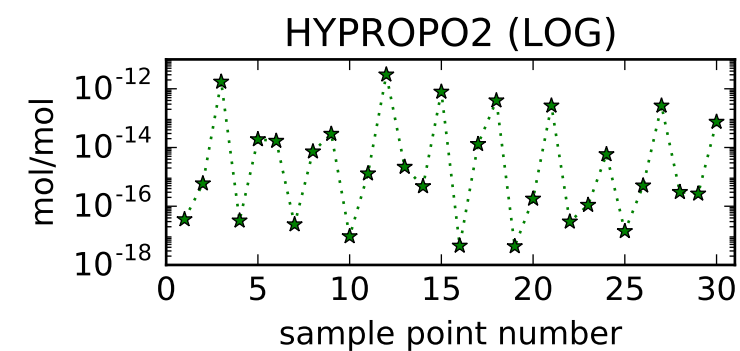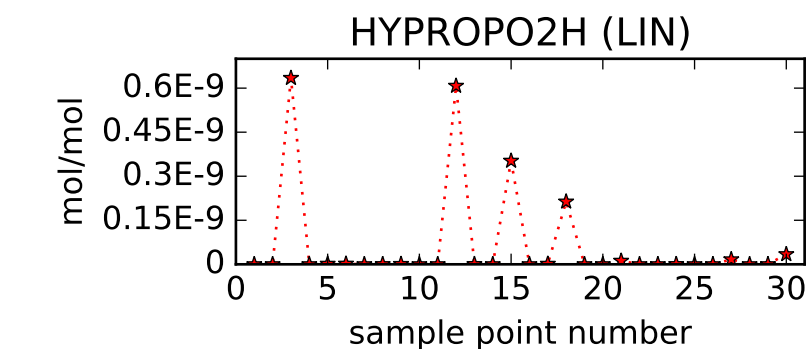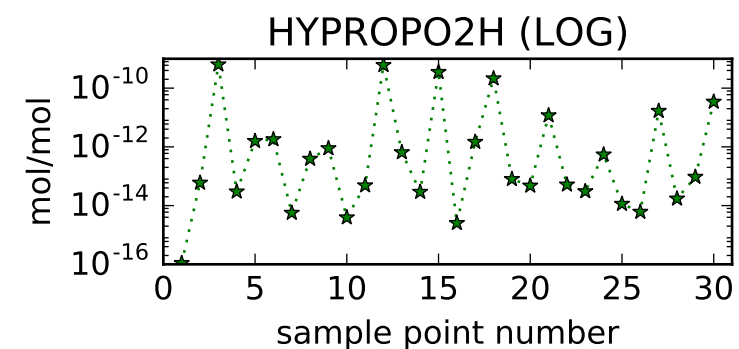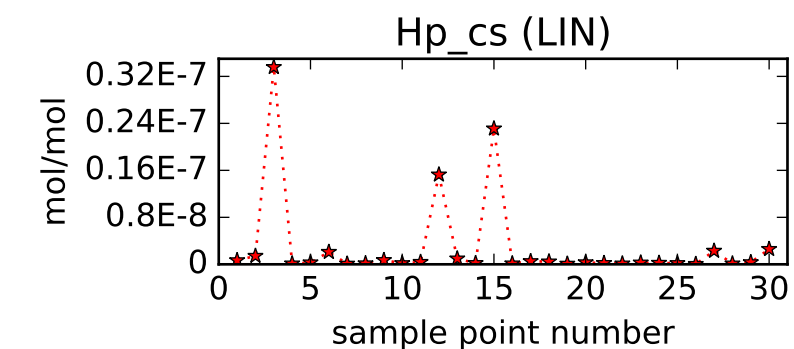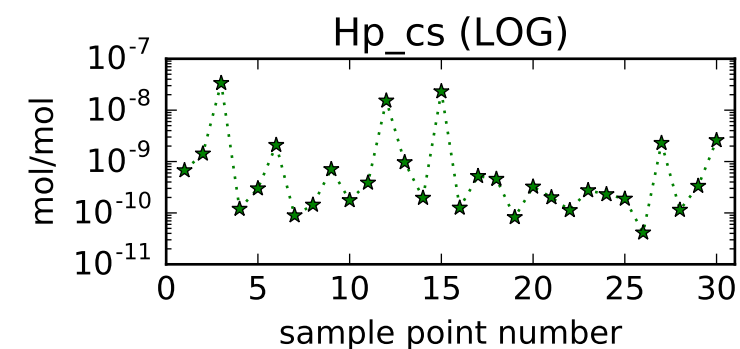



IBUTALOH (LIN)

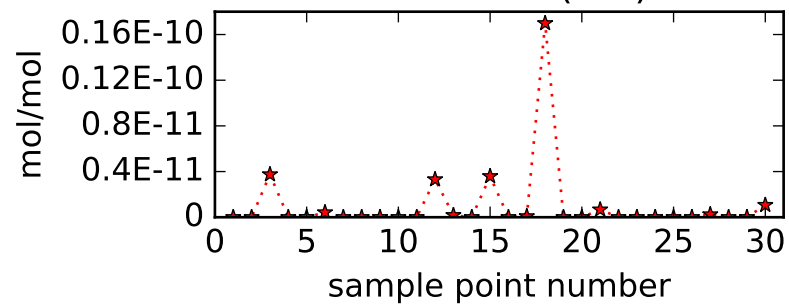

IBUTALOH (LOG)

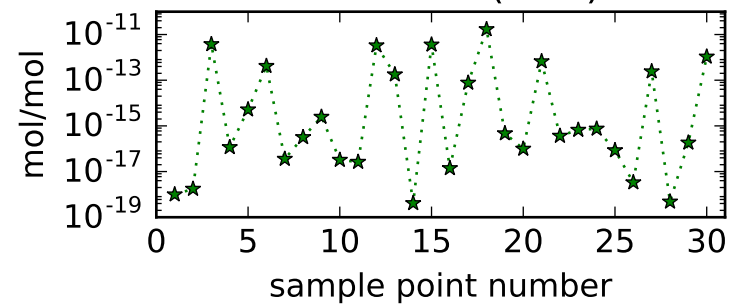

IBUTDIAL (LIN)

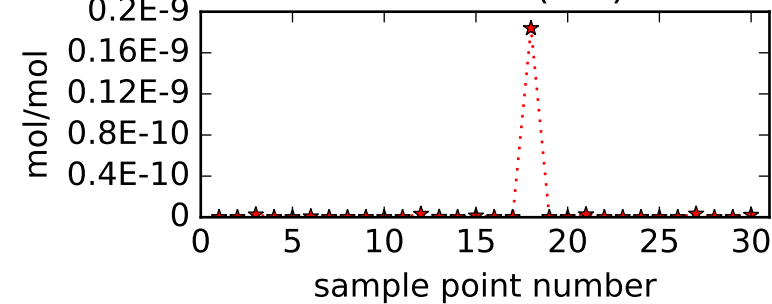

IBUTDIAL (LOG)

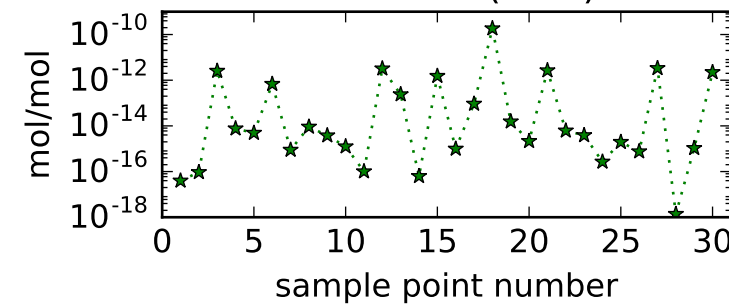

IBUTOLBNO3 (LIN)

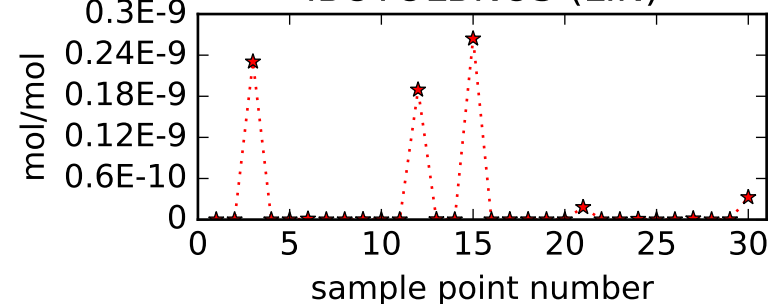

IBUTOLBNO3 (LOG)

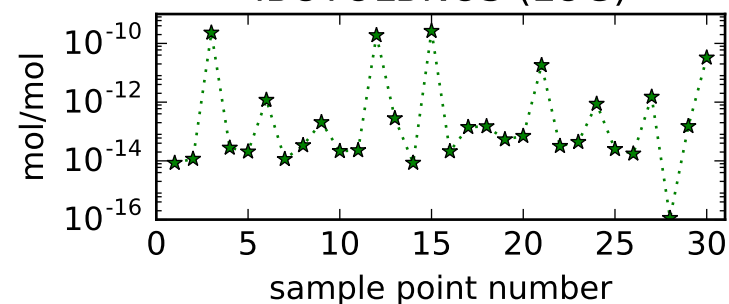

IBUTOLBO2 (LIN)

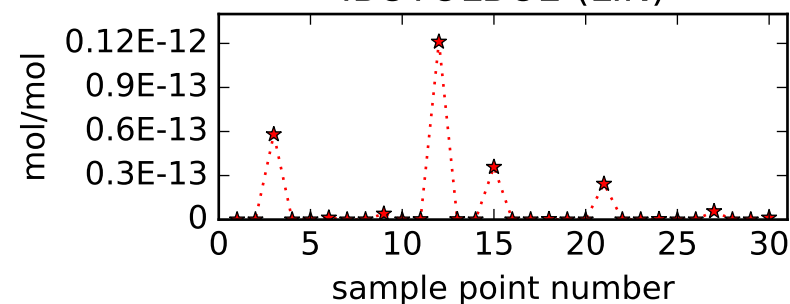

IBUTOLBO2 (LOG)

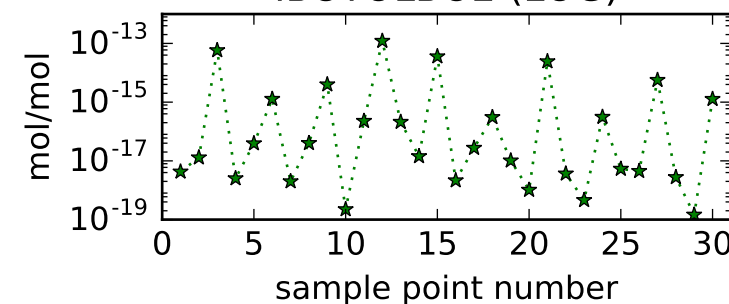

IBUTOLBOOH (LIN)

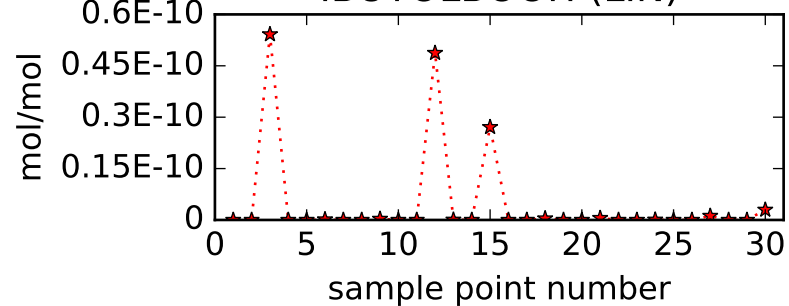

IBUTOLBOOH (LOG)

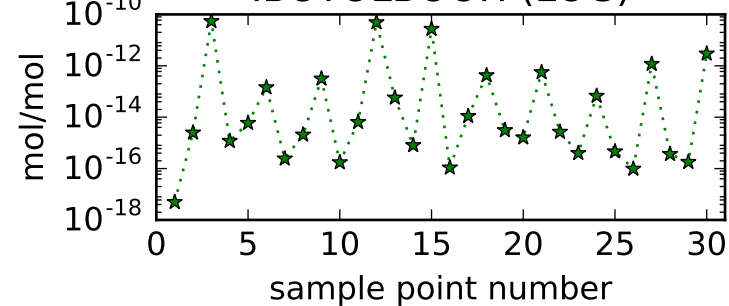

IC3H7NO3 (LIN)

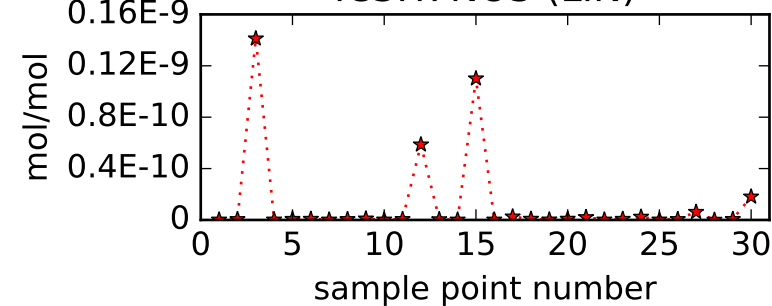

IC3H7NO3 (LOG)

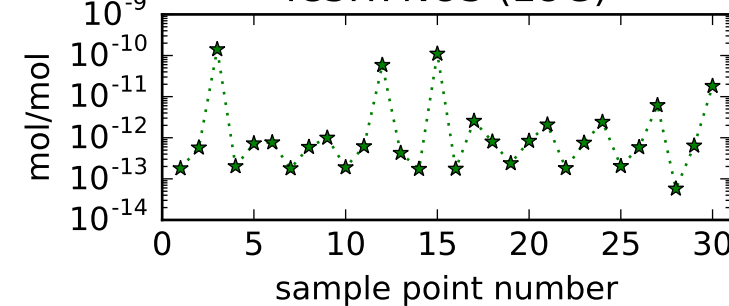

IC3H7O2 (LIN)

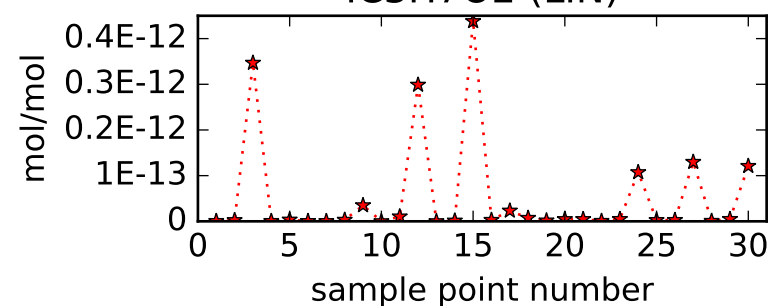

IC3H7O2 (LOG)

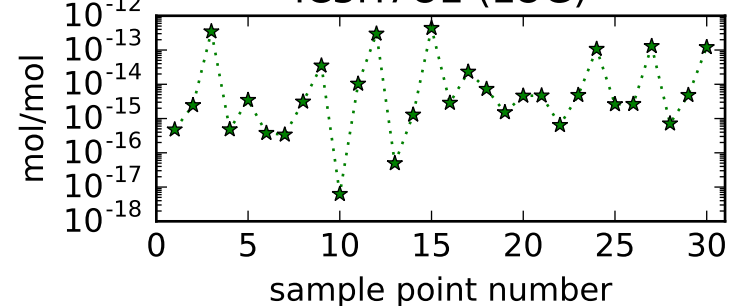

IC3H7OOH (LIN)

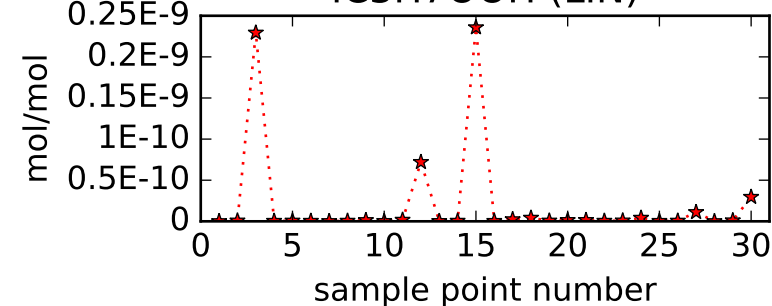

IC3H7OOH (LOG)

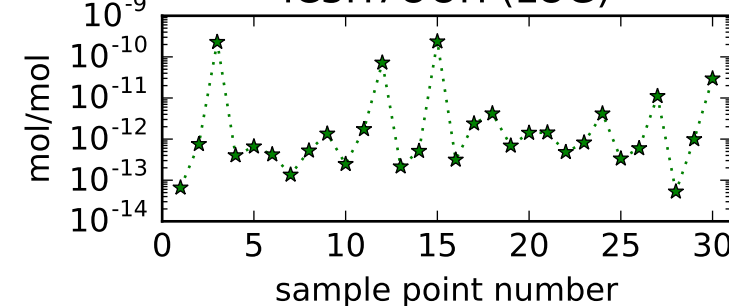

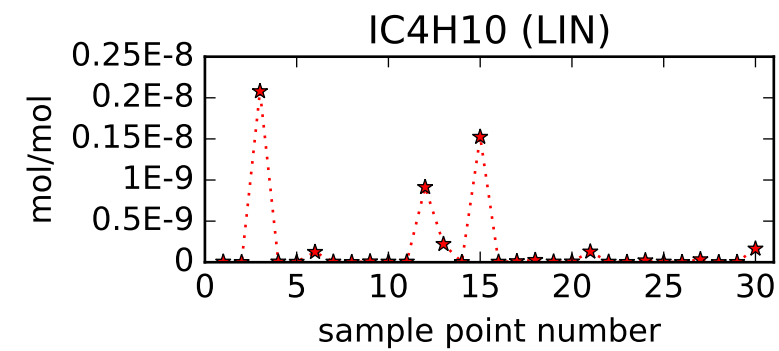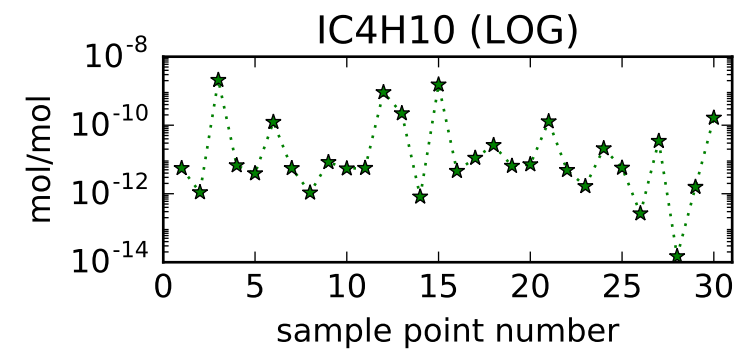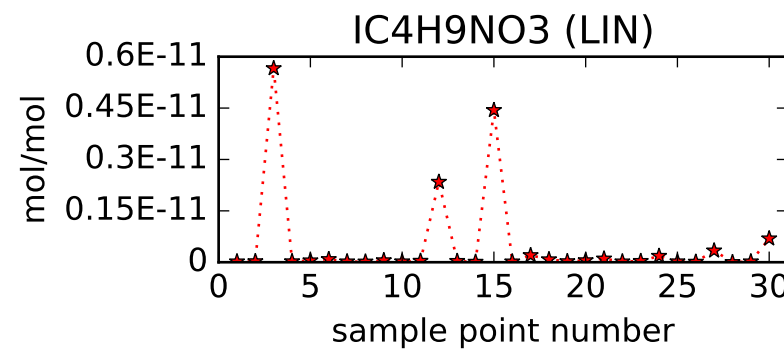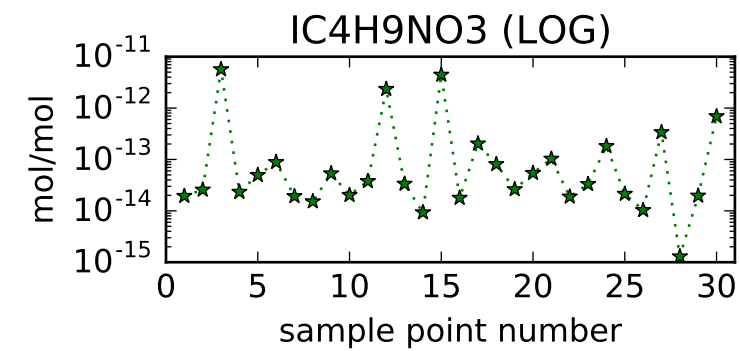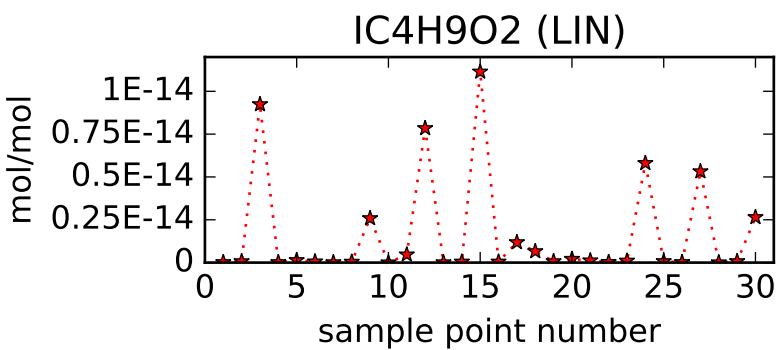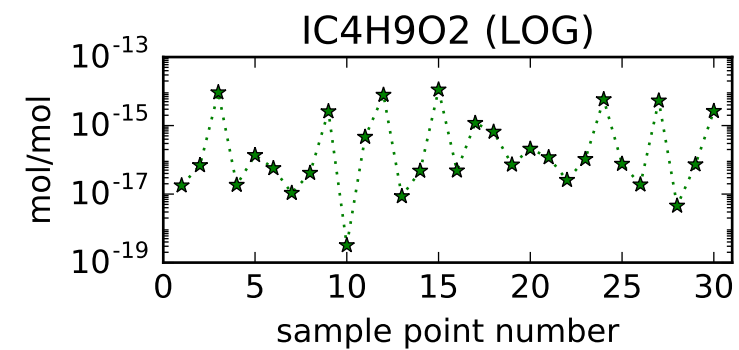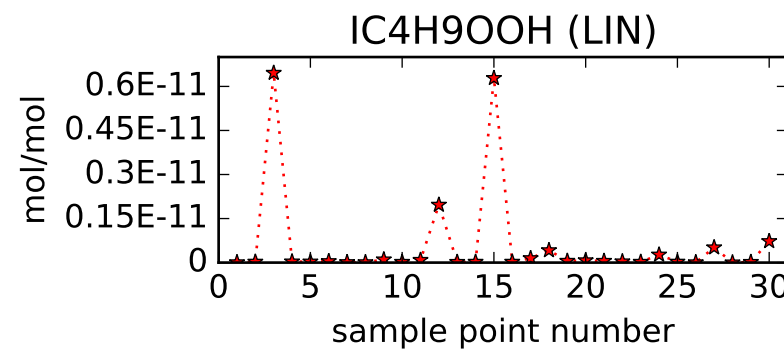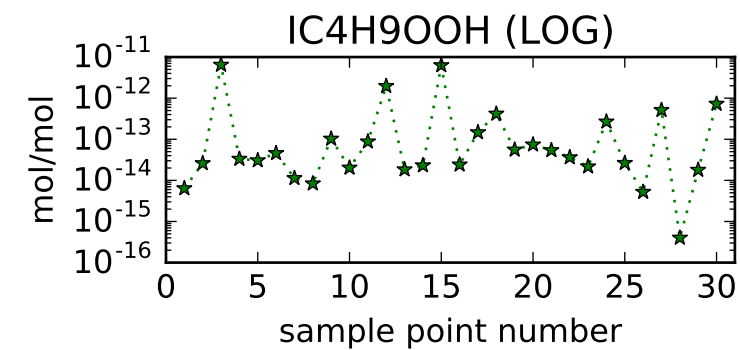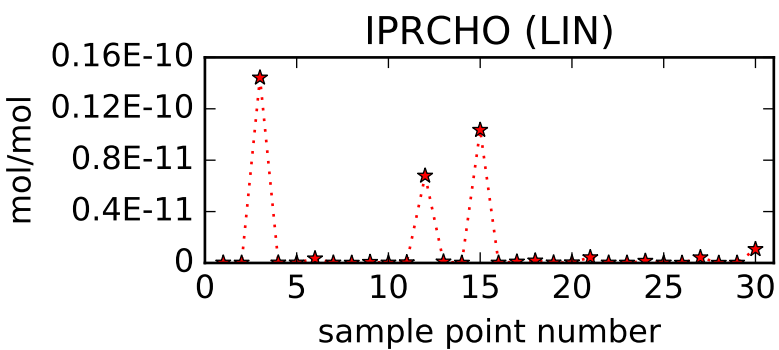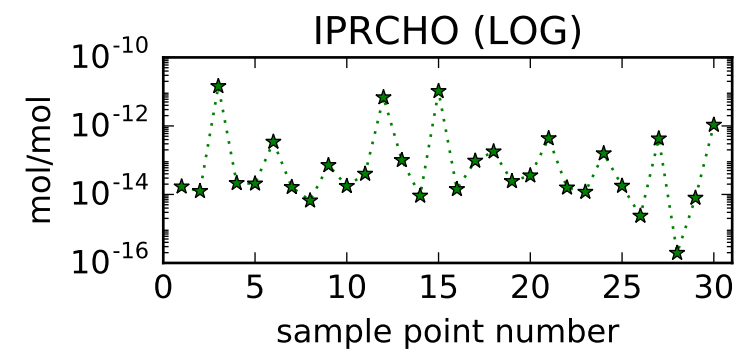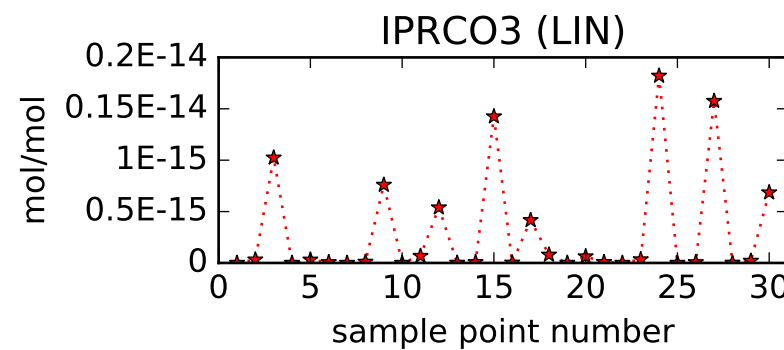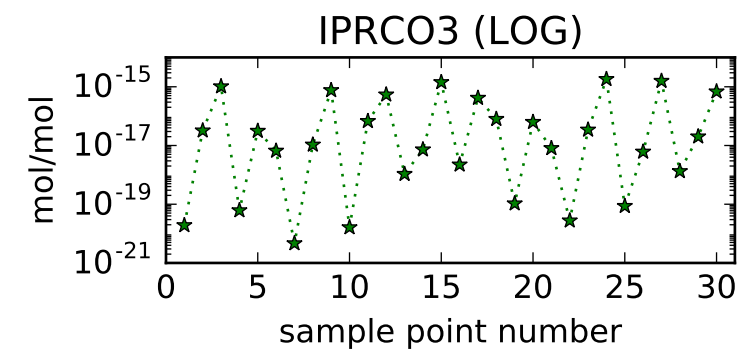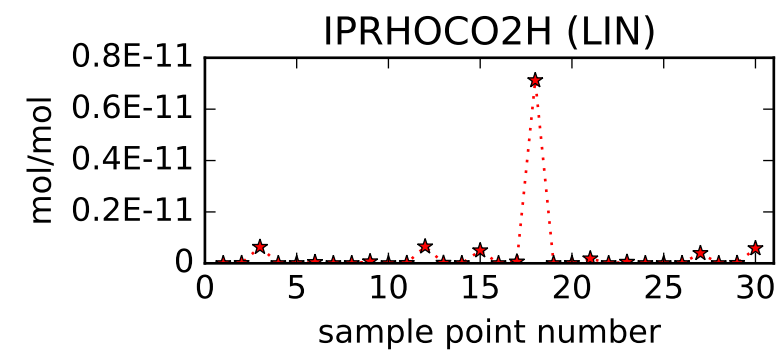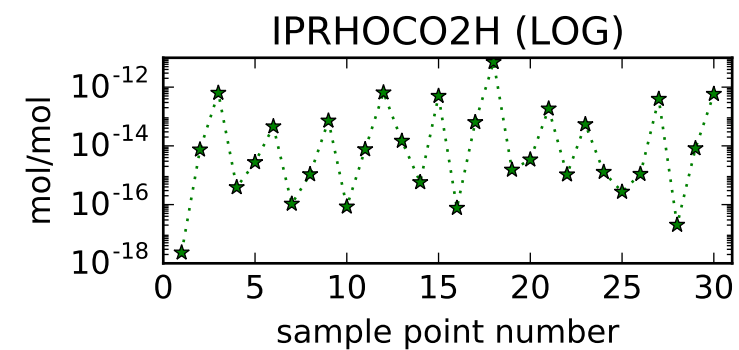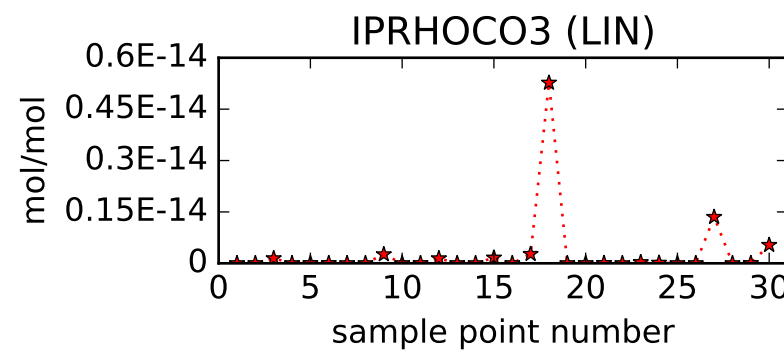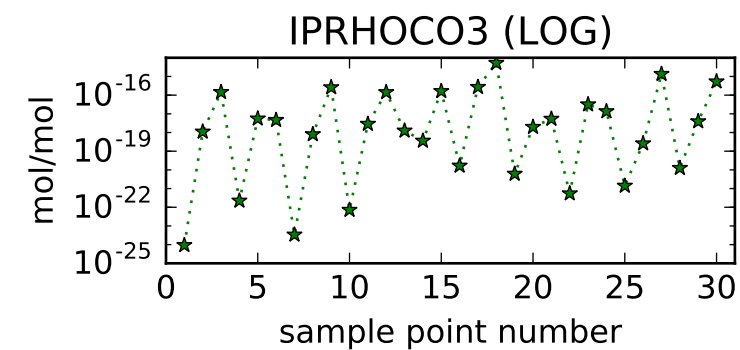

IPRHOCO3H (LIN)

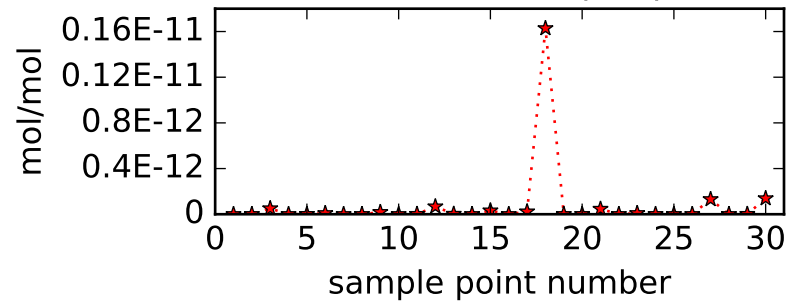

IPRHOCO3H (LOG)

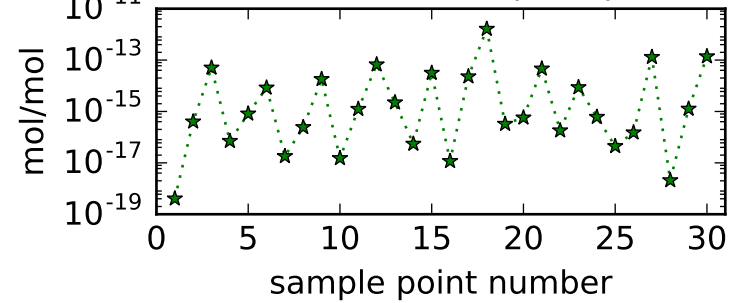

IPROPOL (LIN)

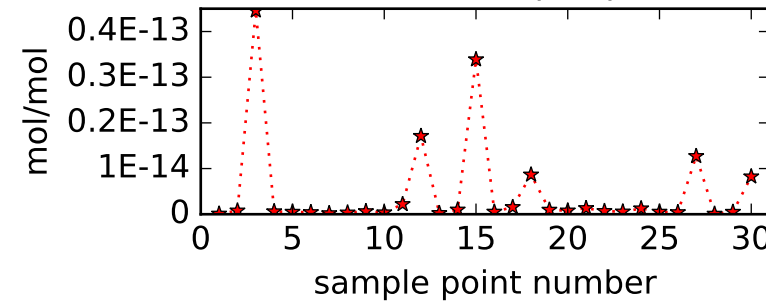

IPROPOL (LOG)

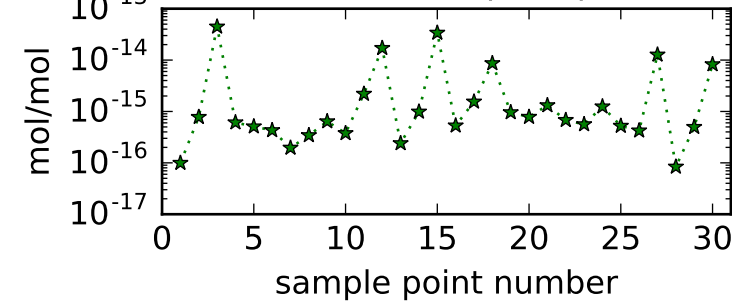

ISOPAB (LIN)

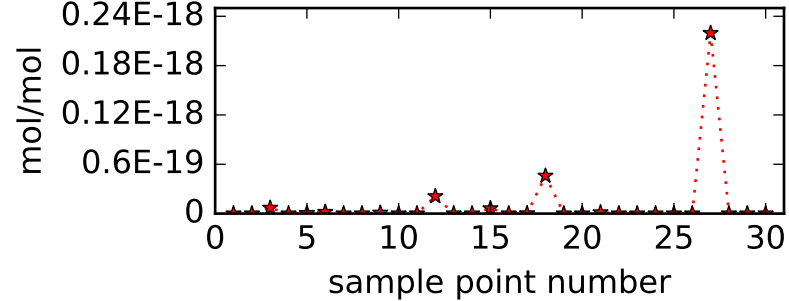

ISOPAB (LOG)

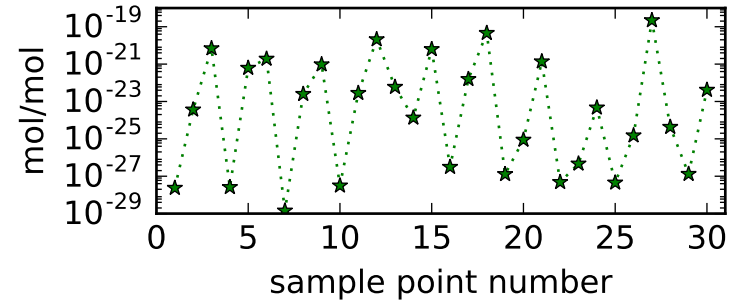

ISOPAHOH (LIN)

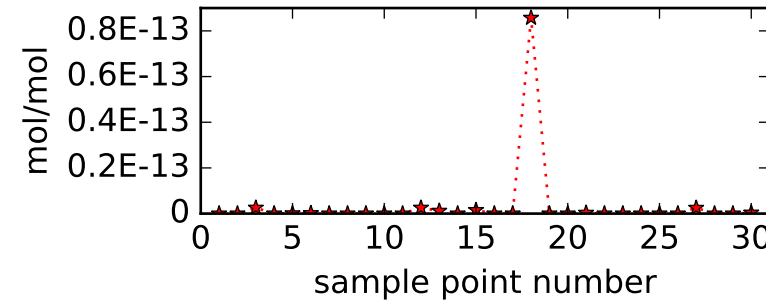

ISOPAHOH (LOG)

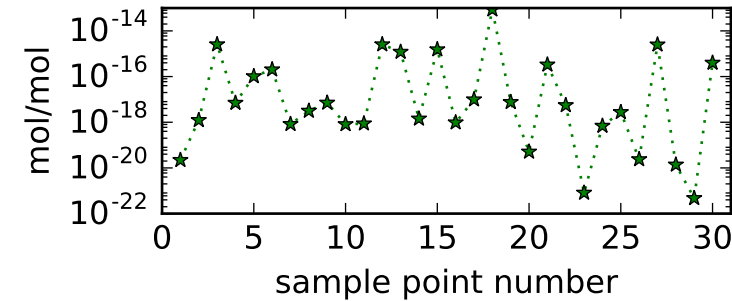

ISOPBDNO3O2 (LIN)

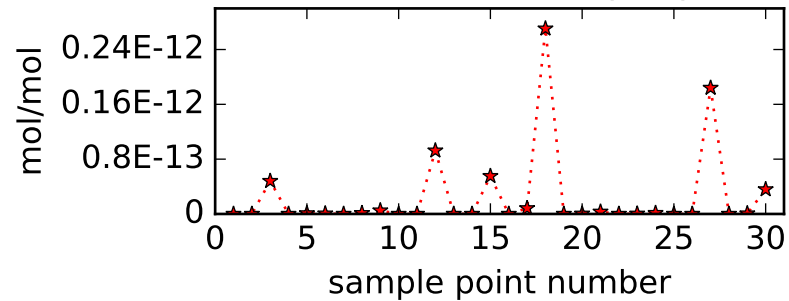

ISOPBDNO3O2 (LOG)

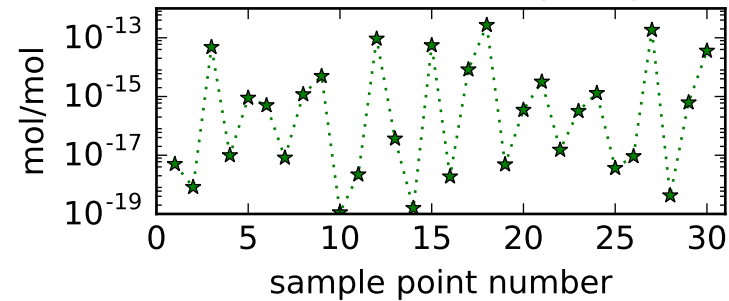

ISOPBNO3 (LIN)

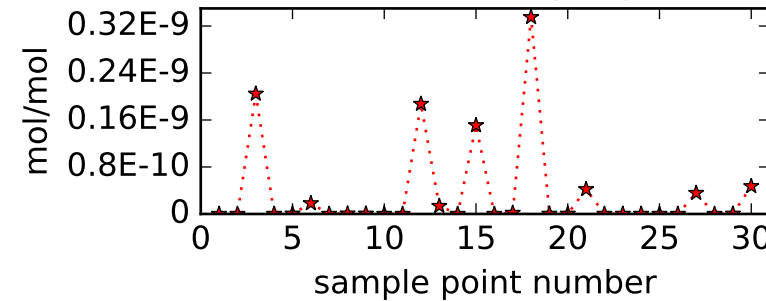

ISOPBNO3 (LOG)

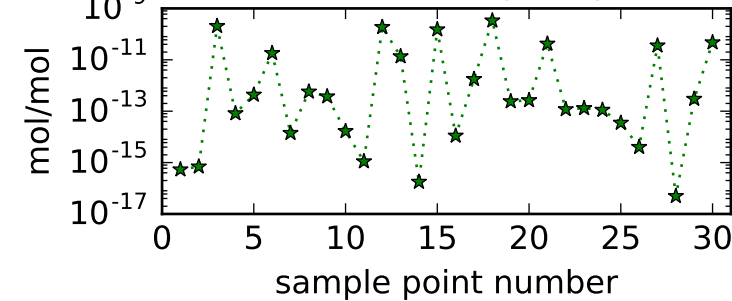

ISOPBO2 (LIN)

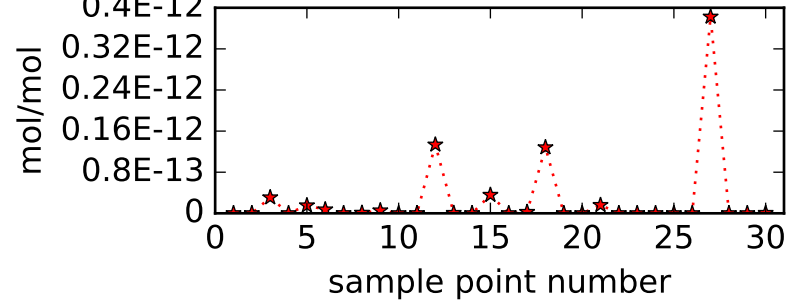

ISOPBO2 (LOG)

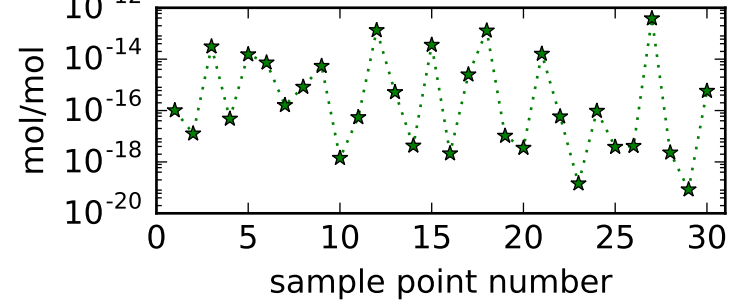

ISOPBOH (LIN)

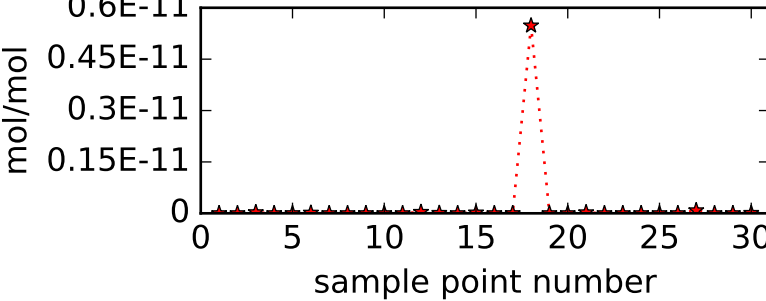

ISOPBOH (LOG)

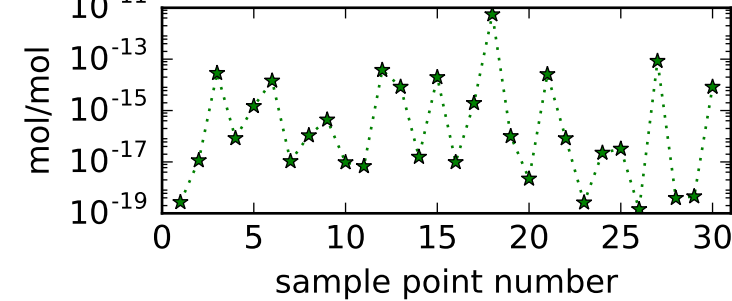

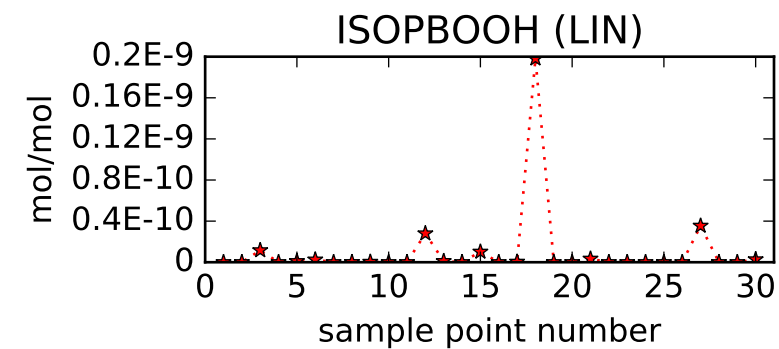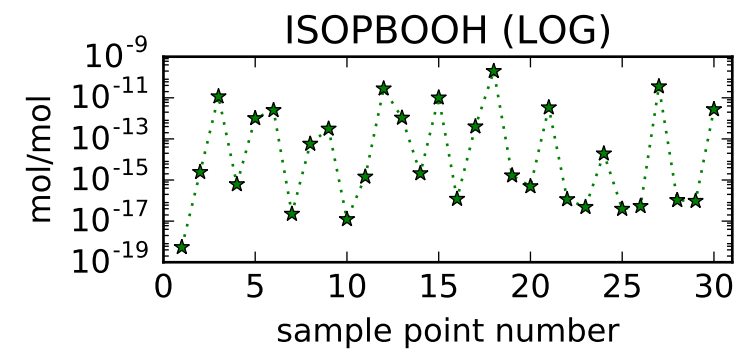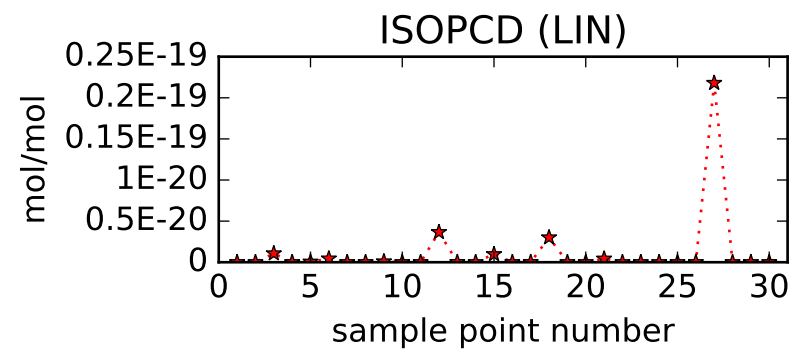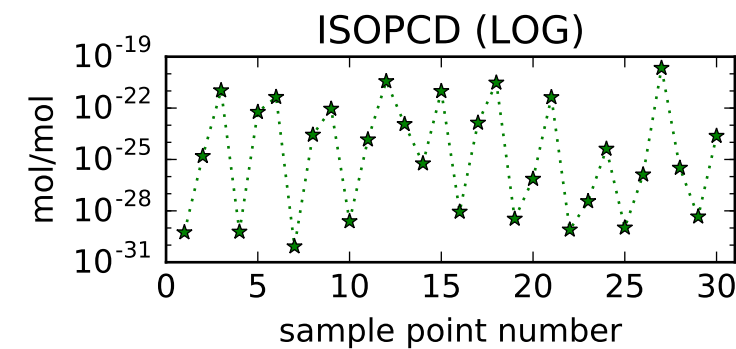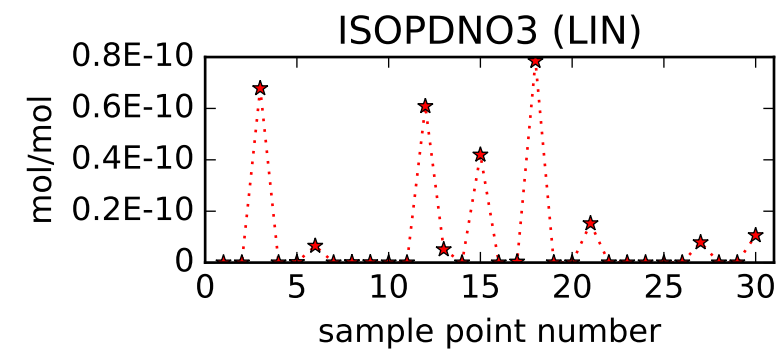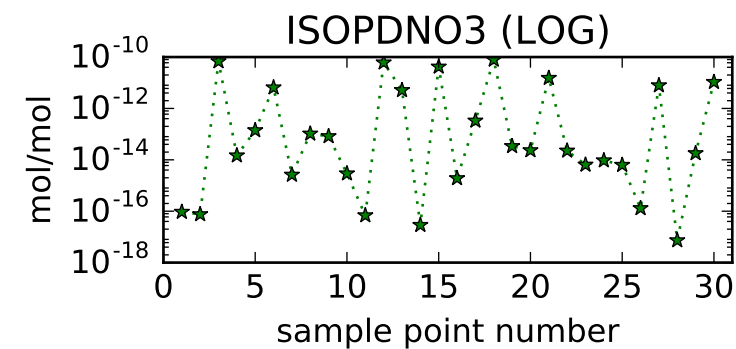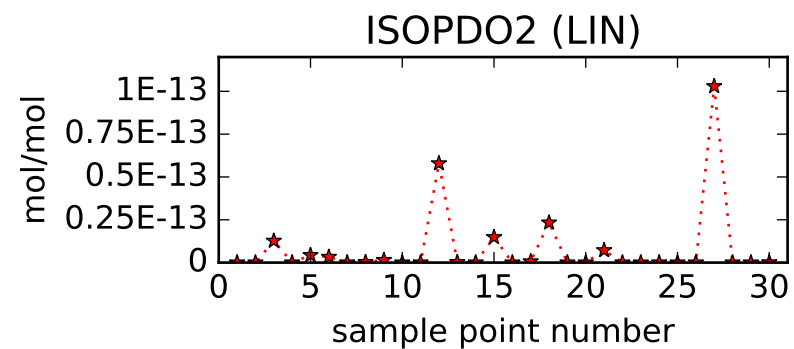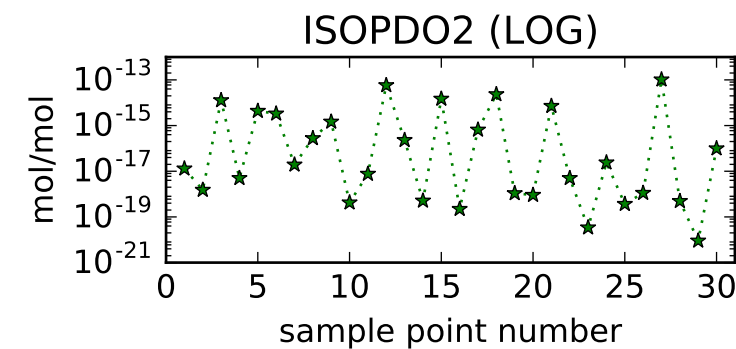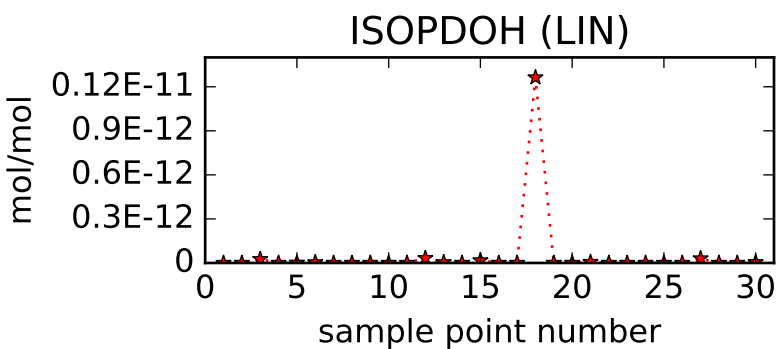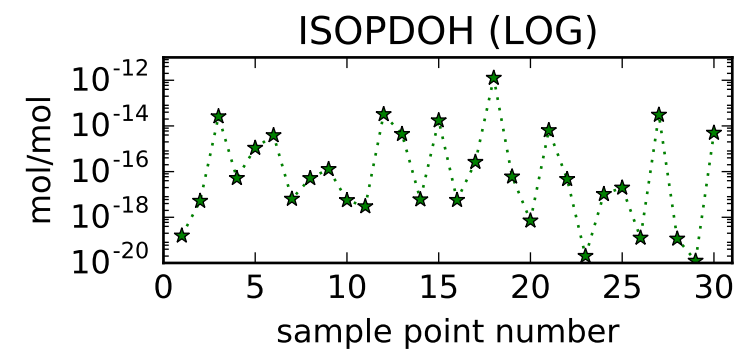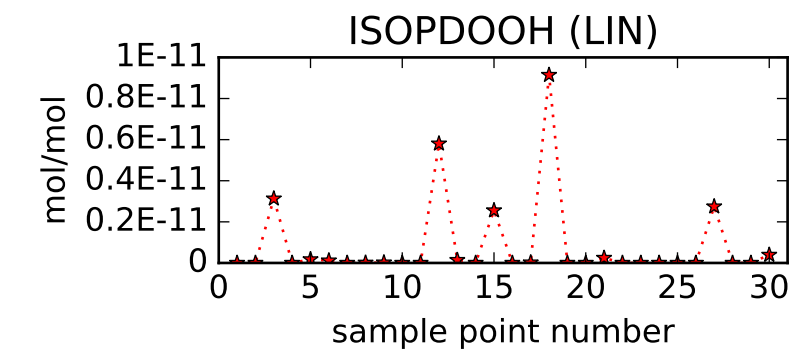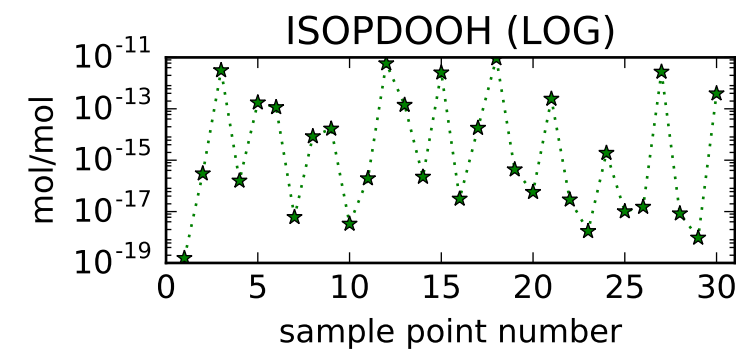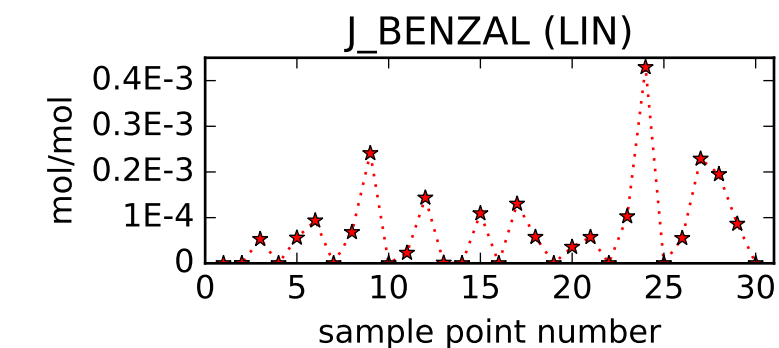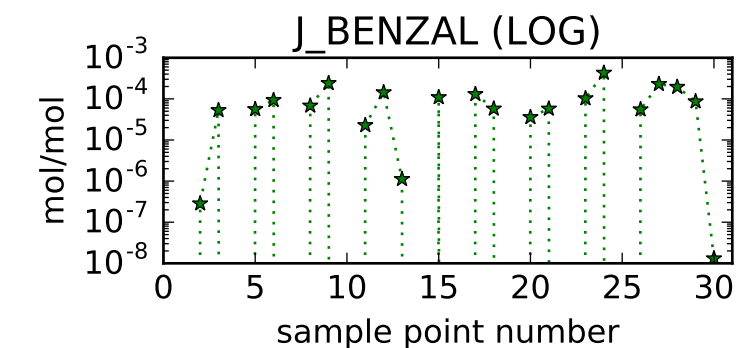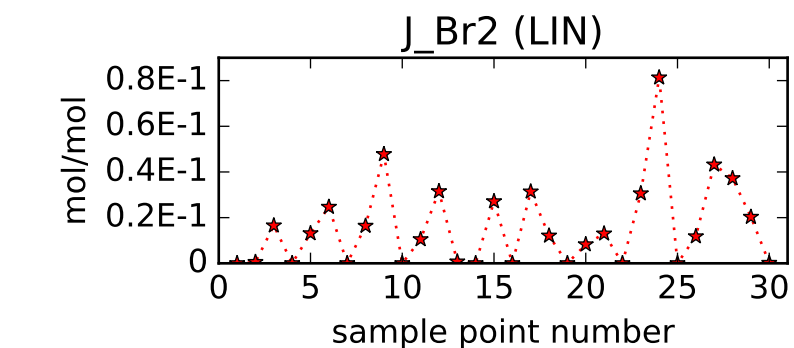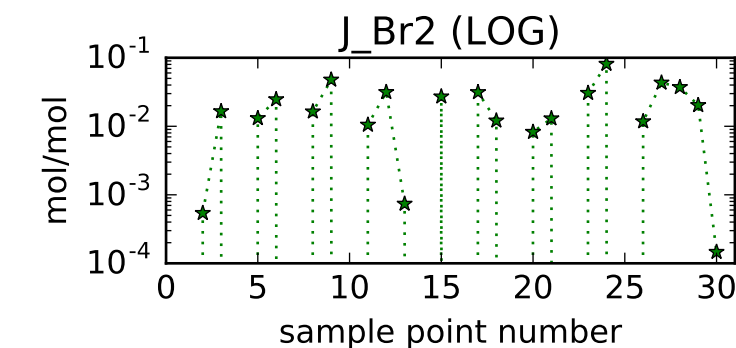

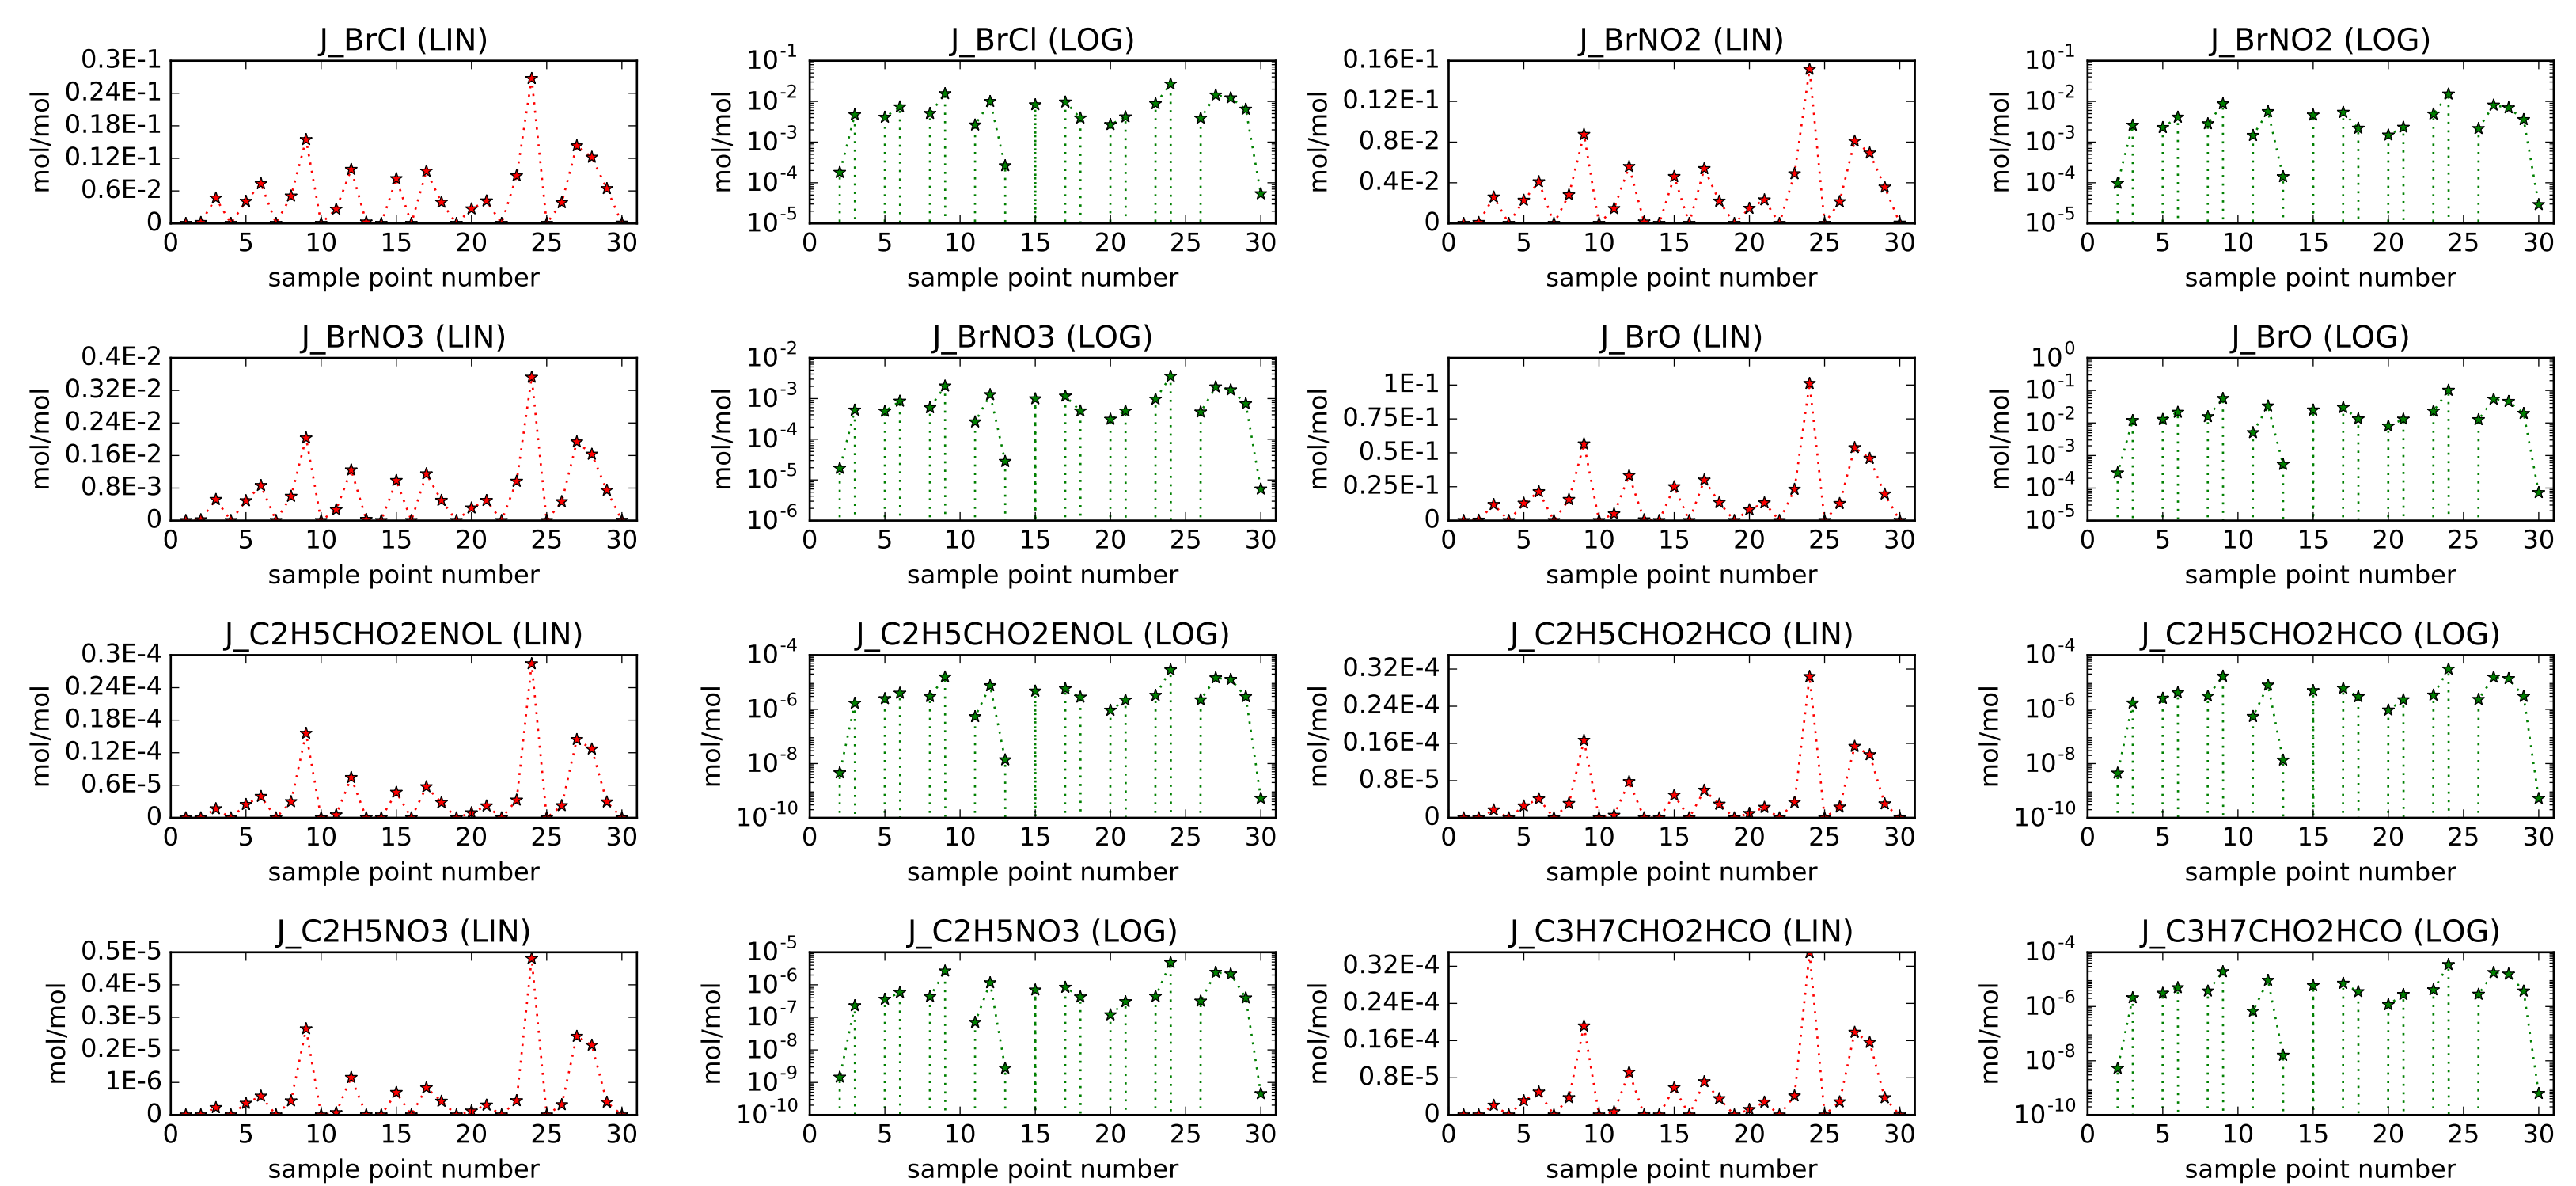



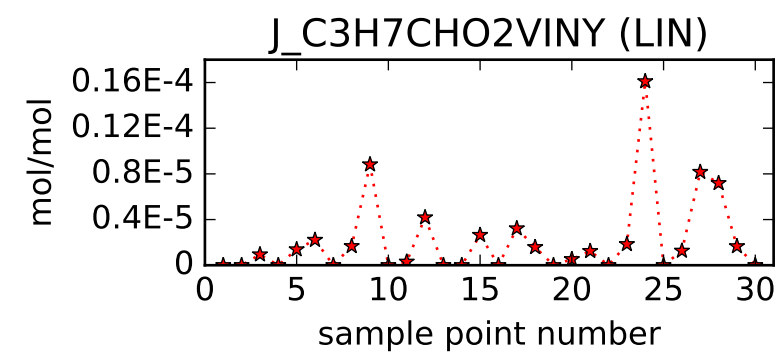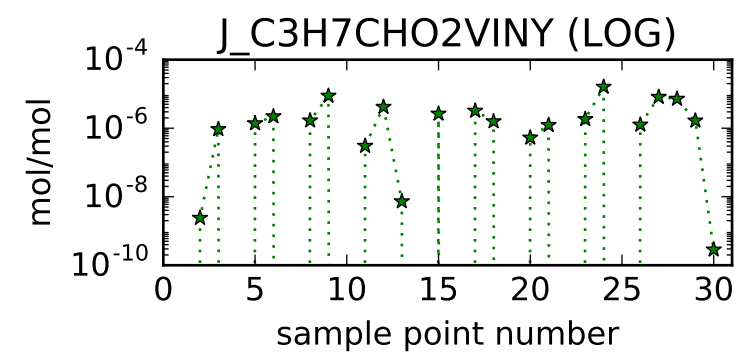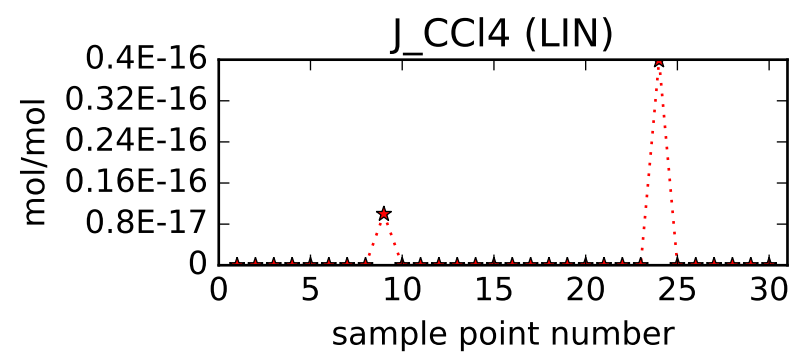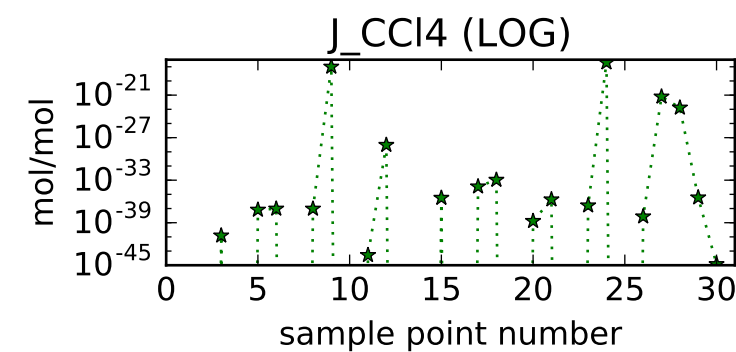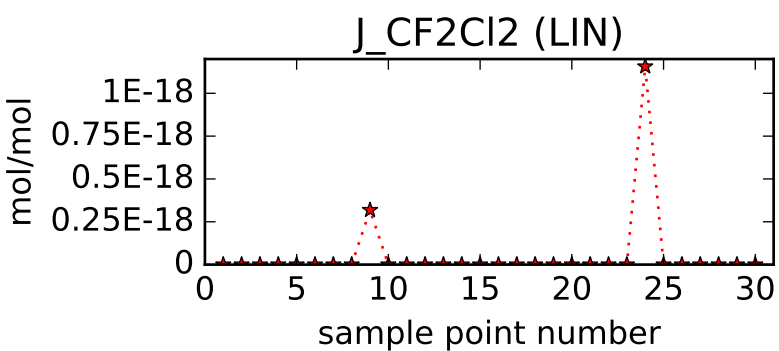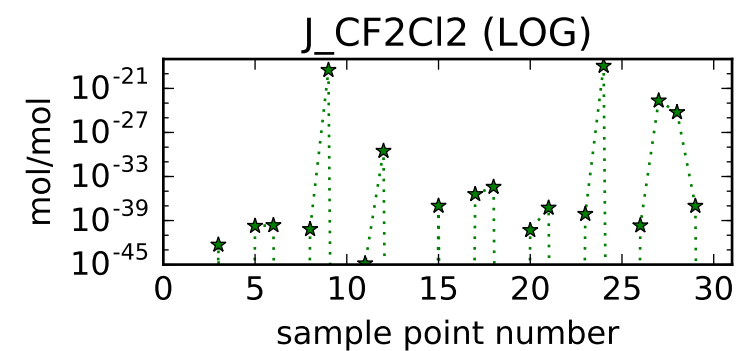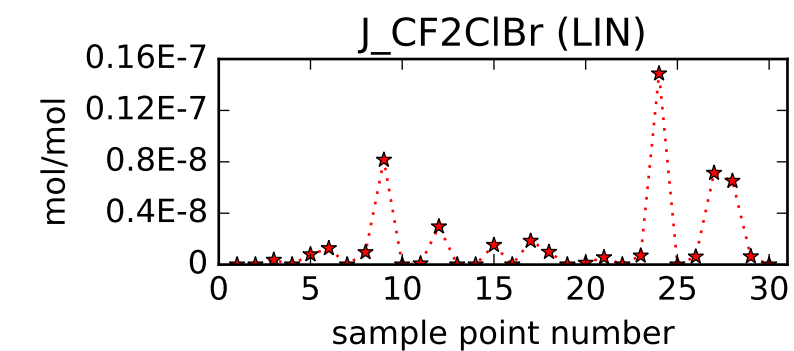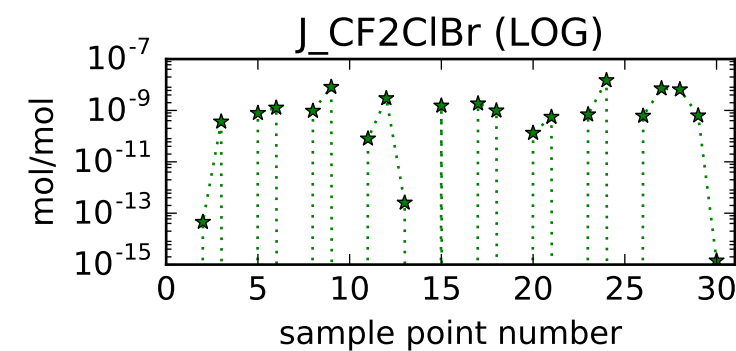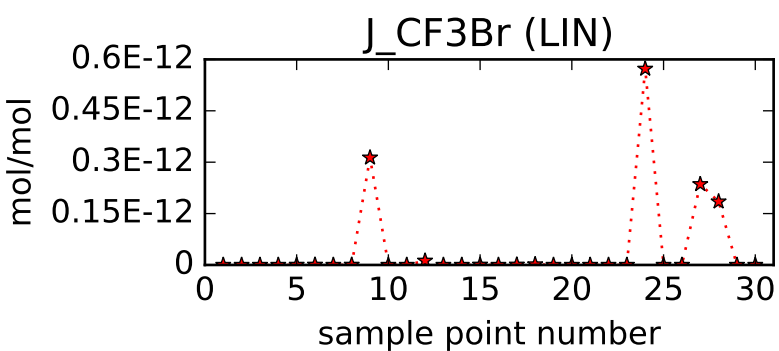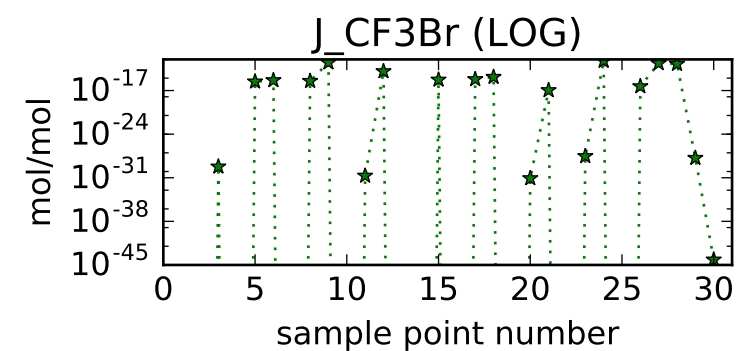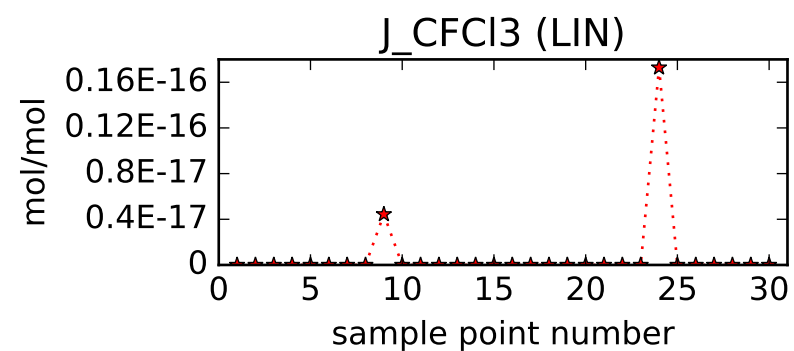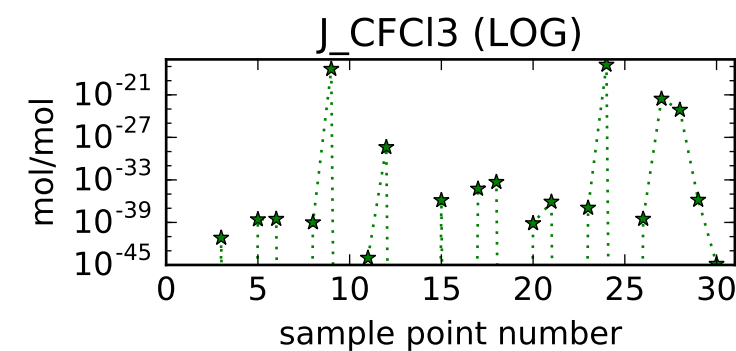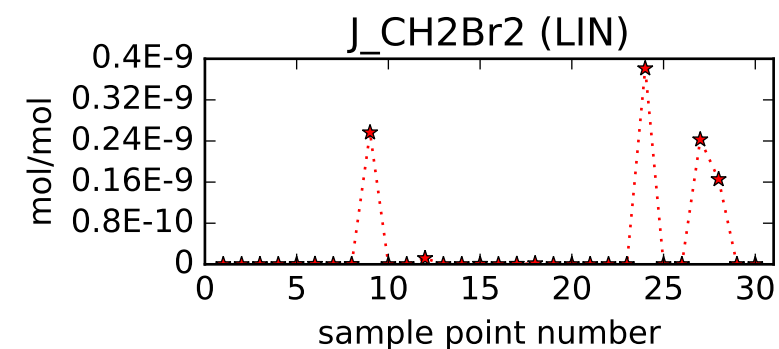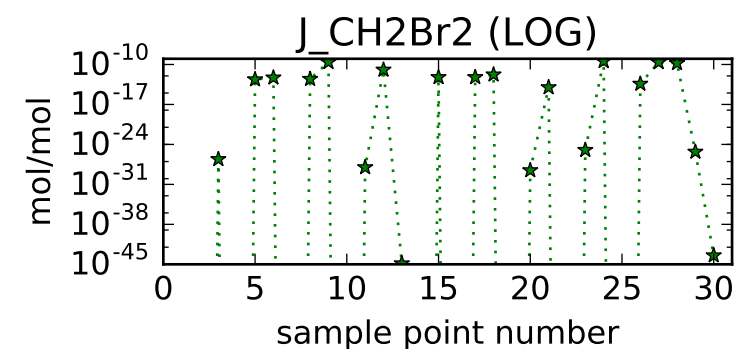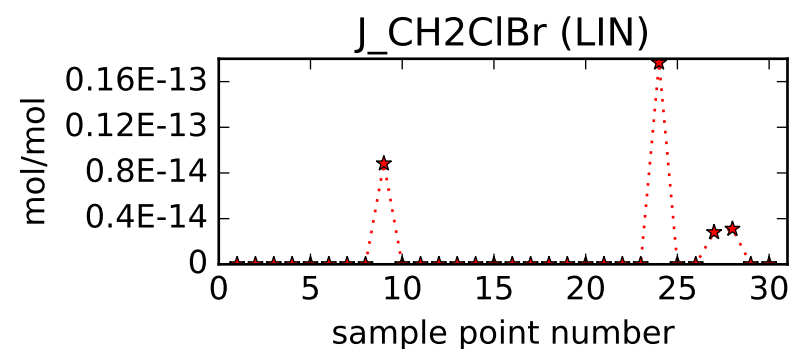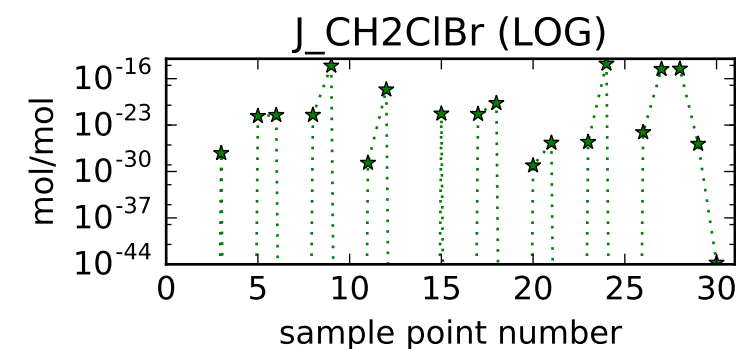

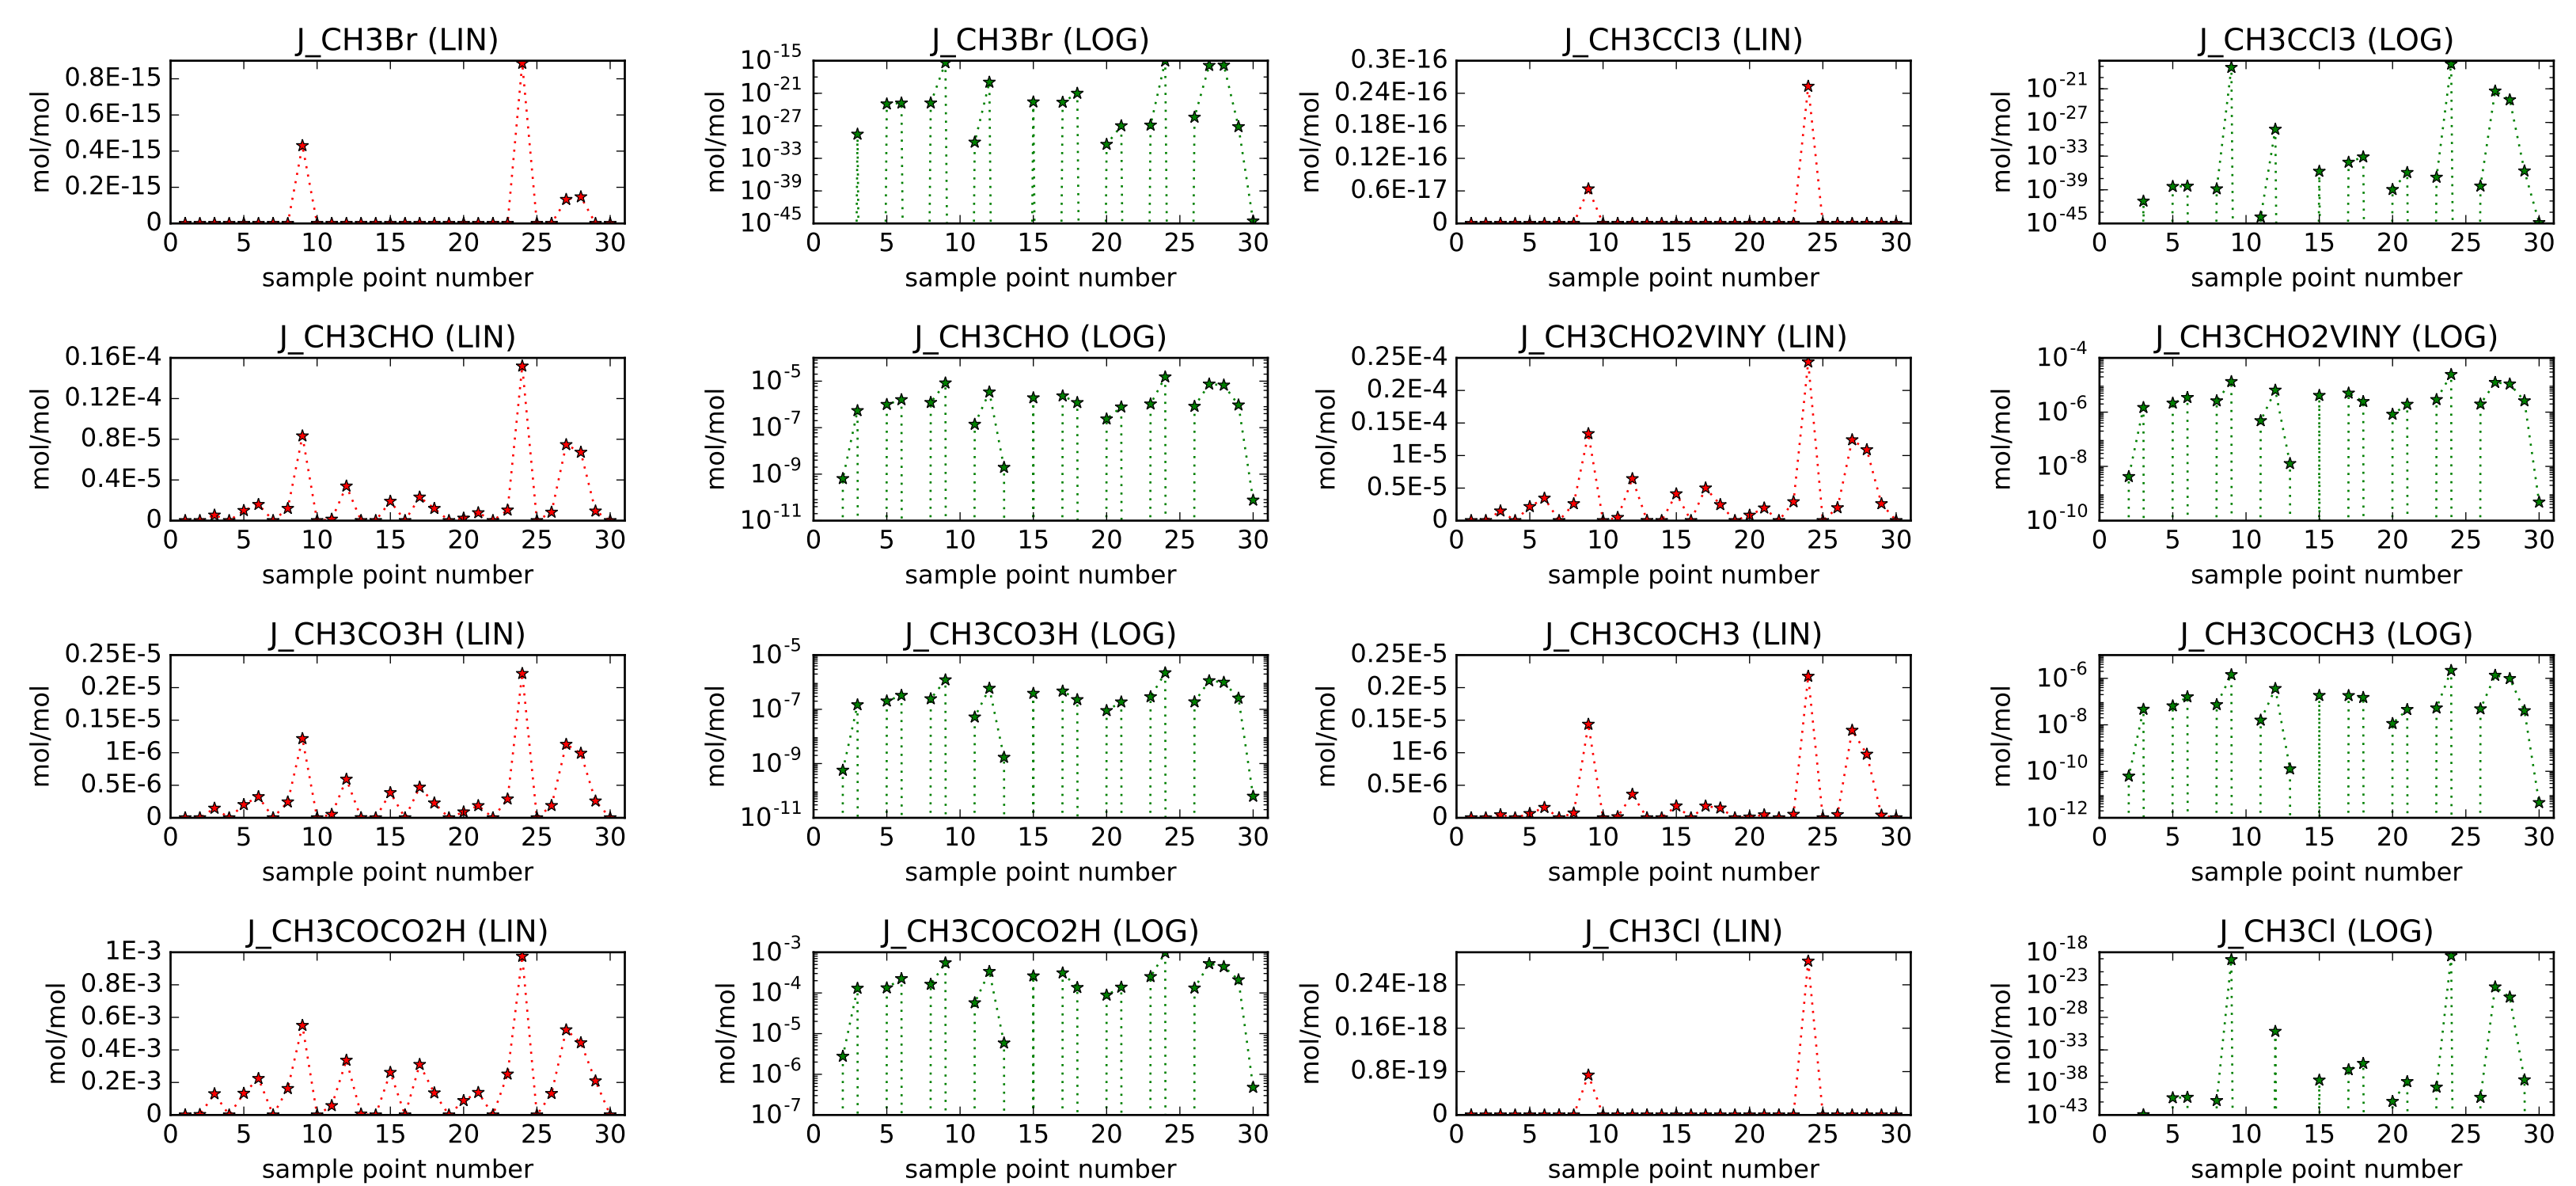

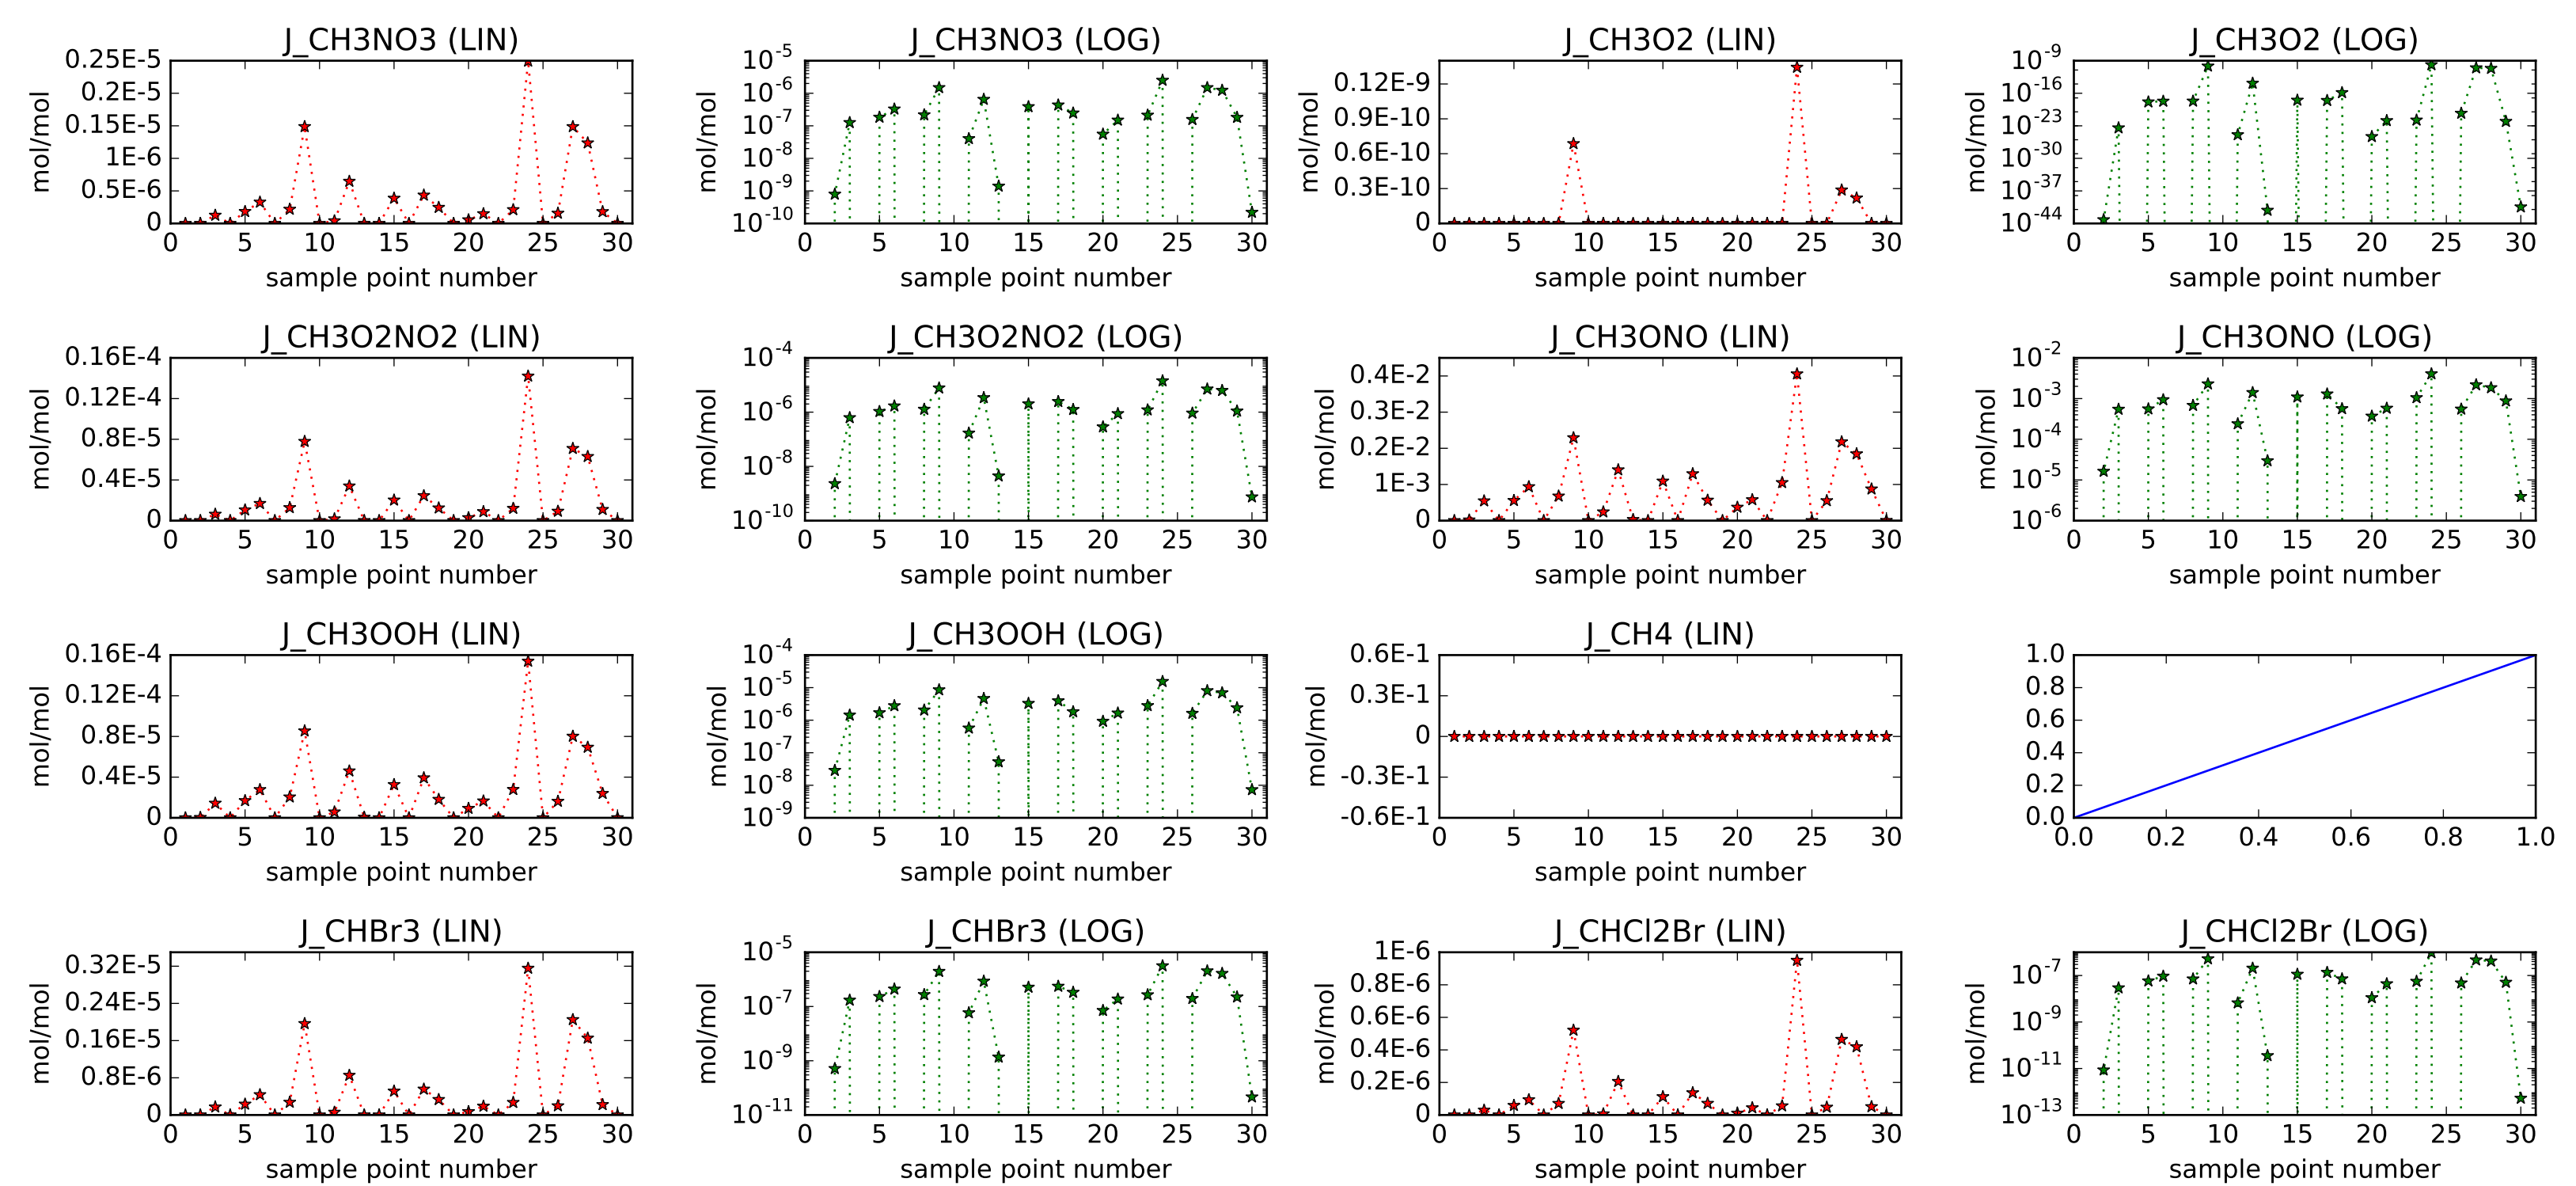

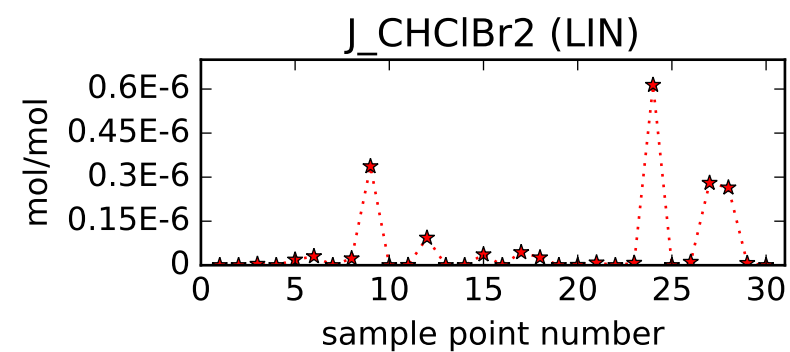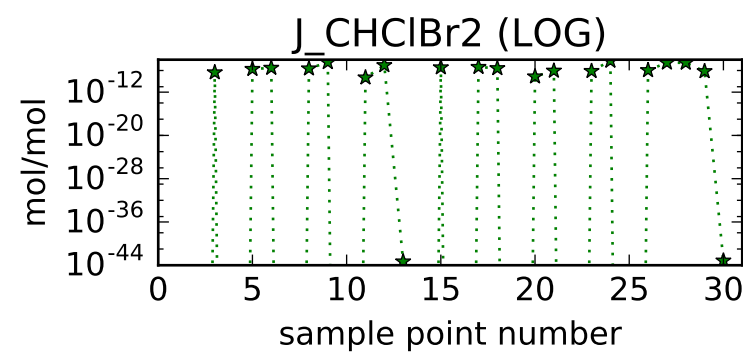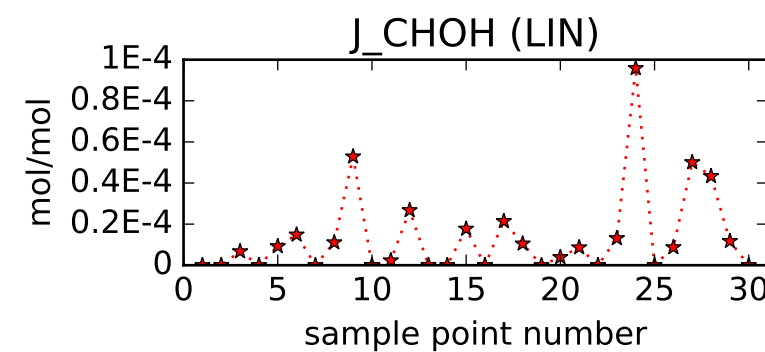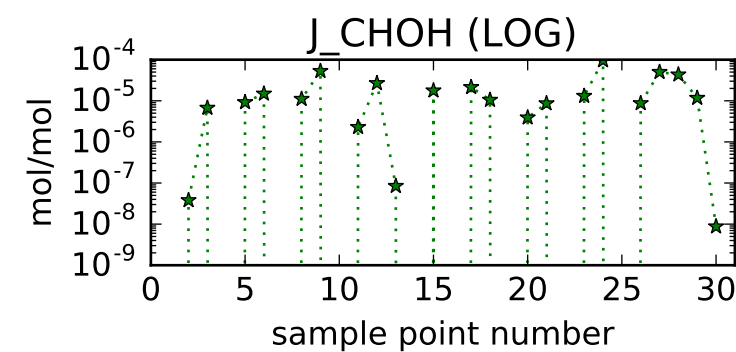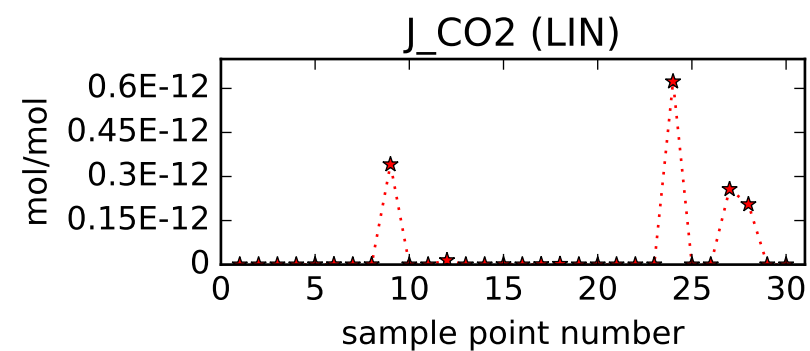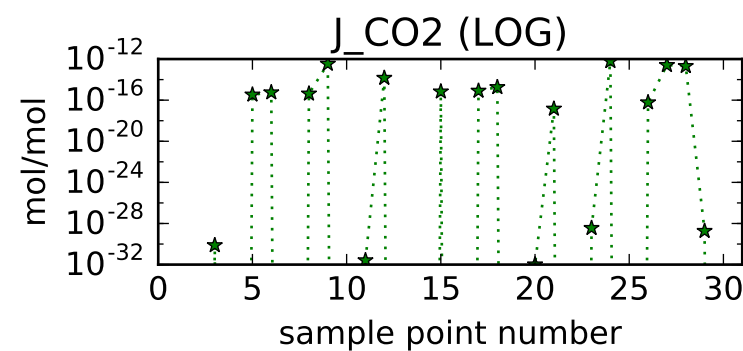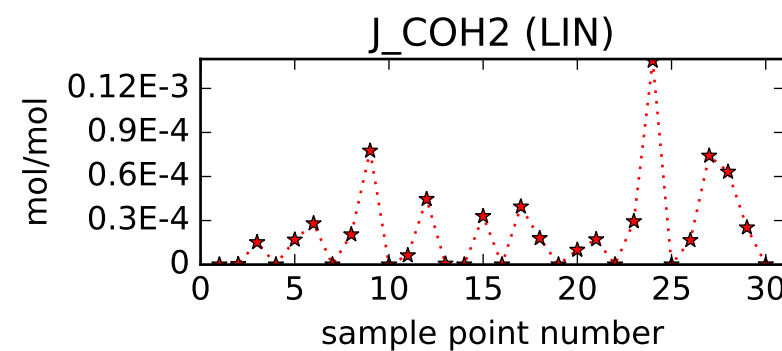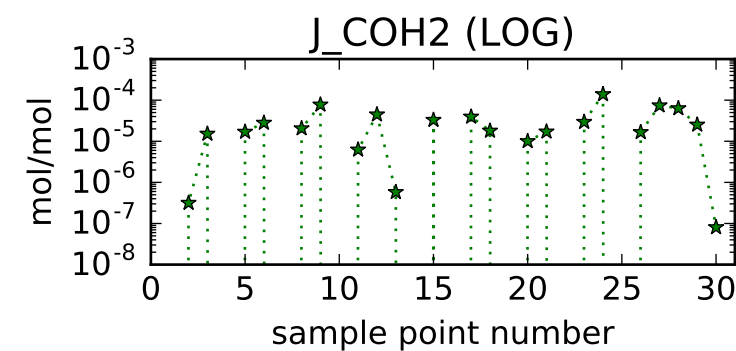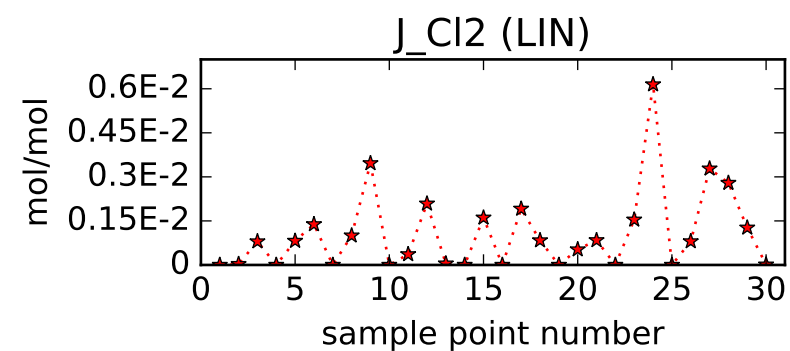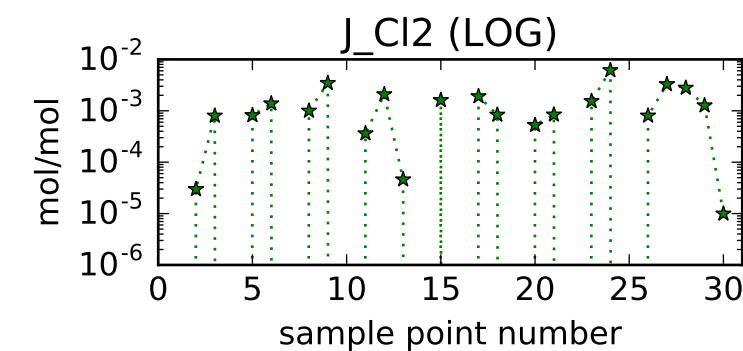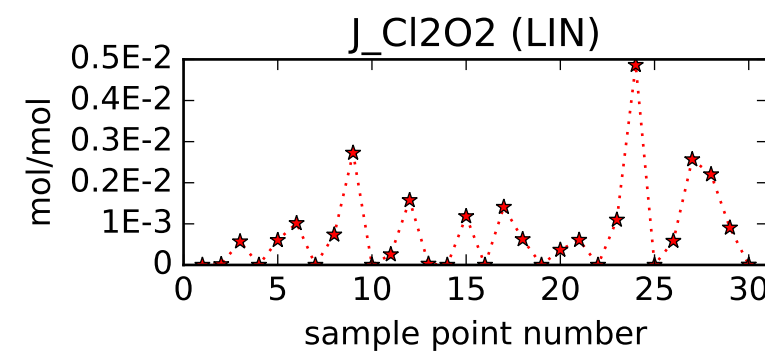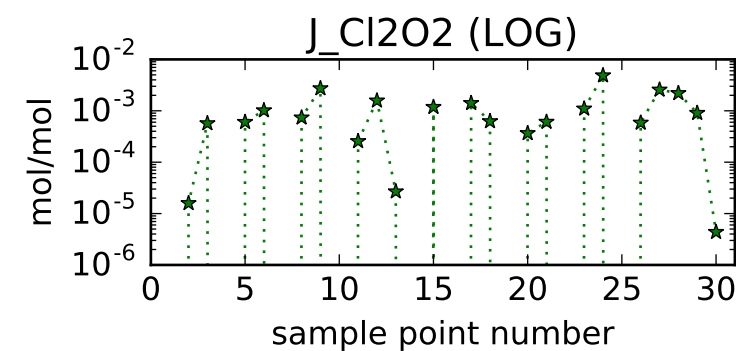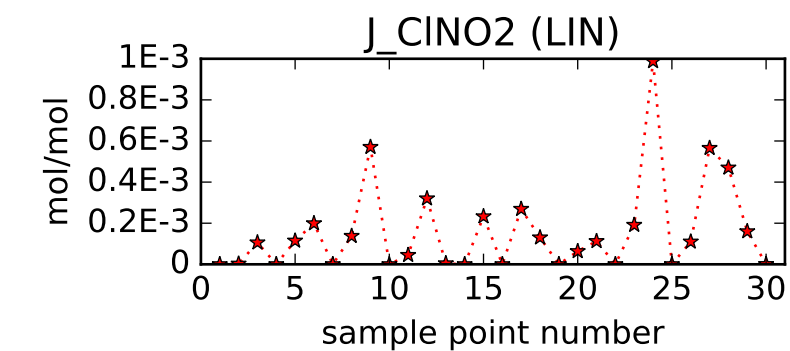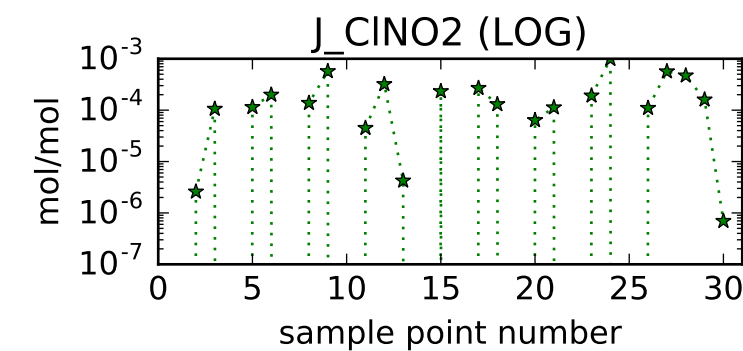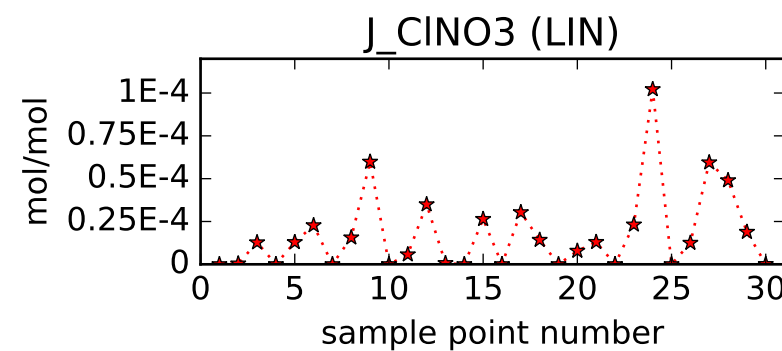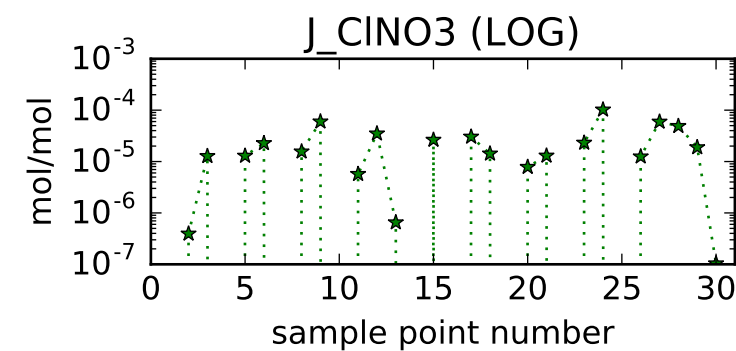

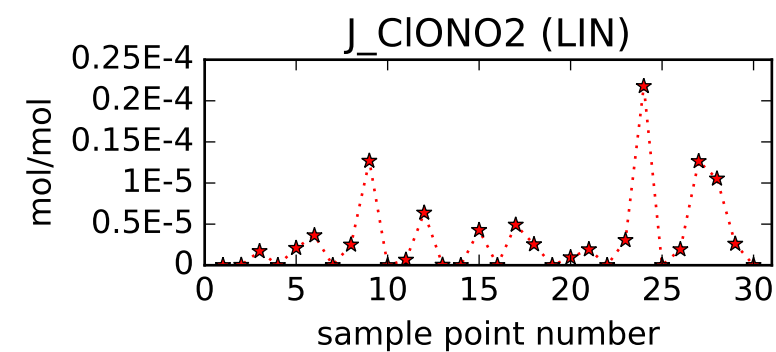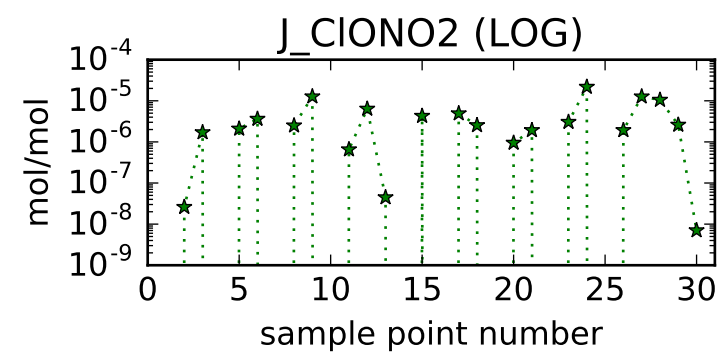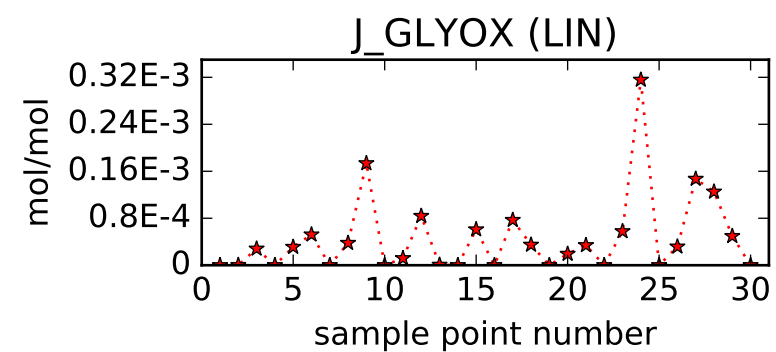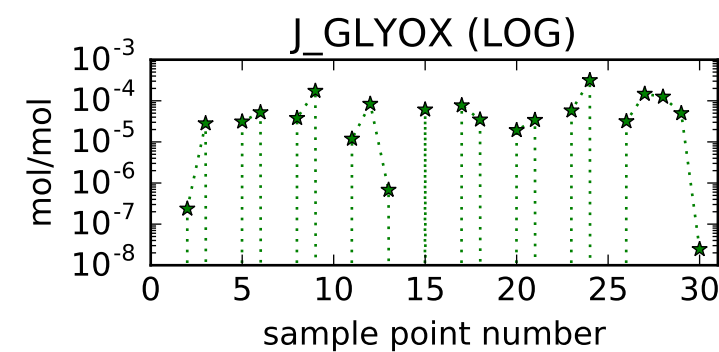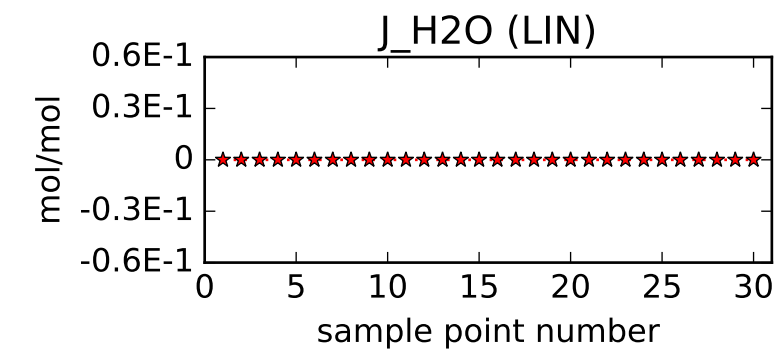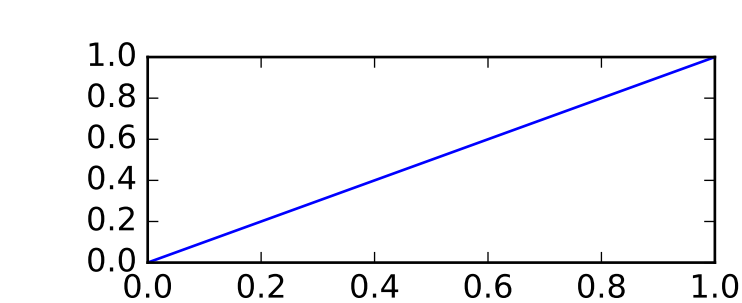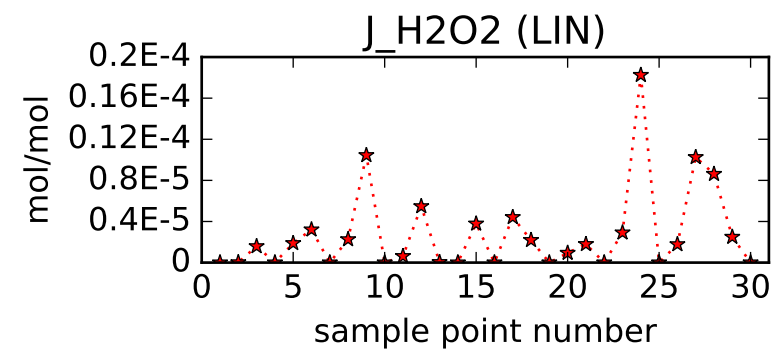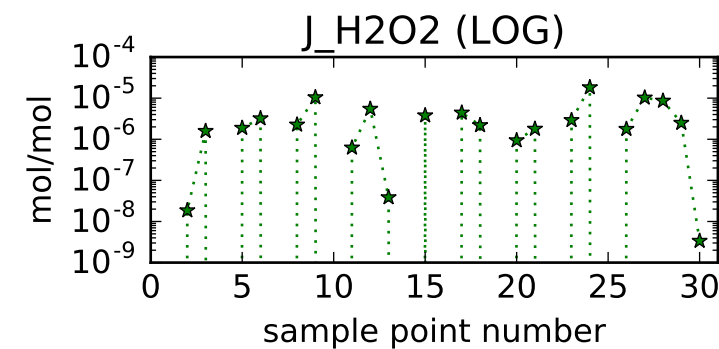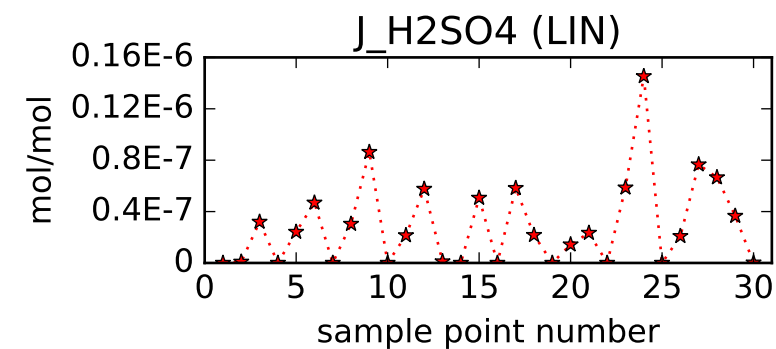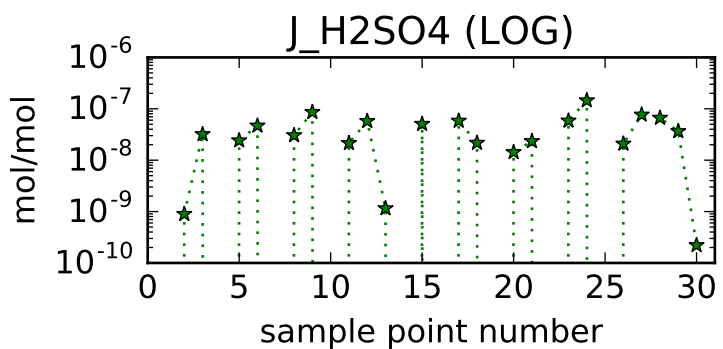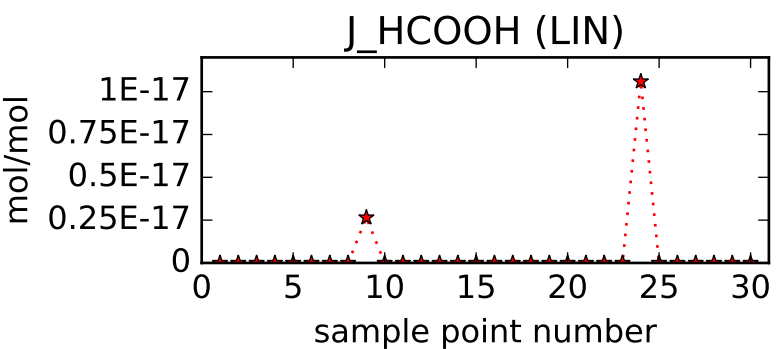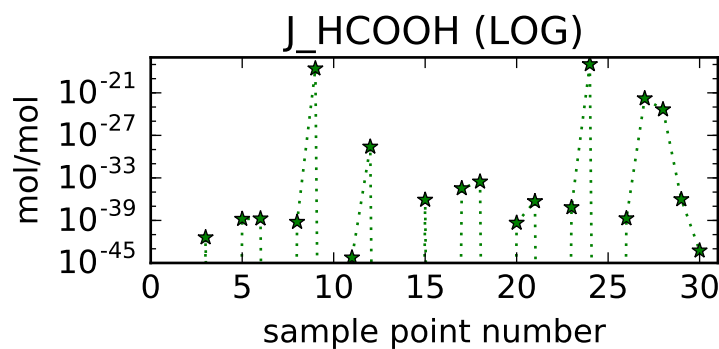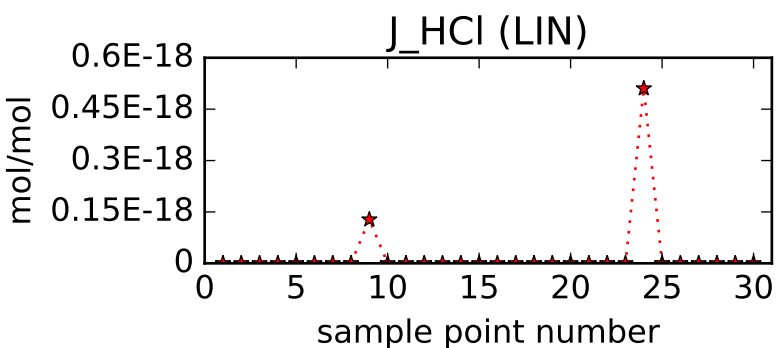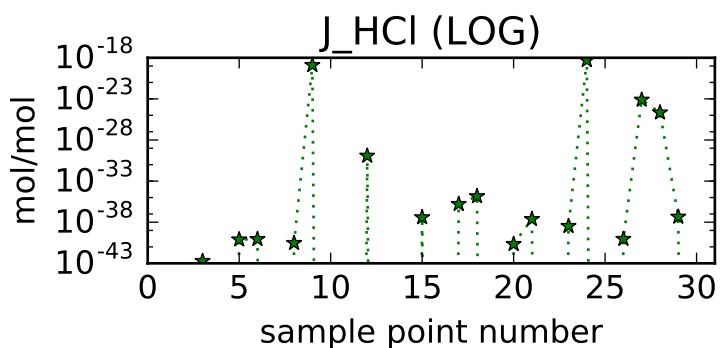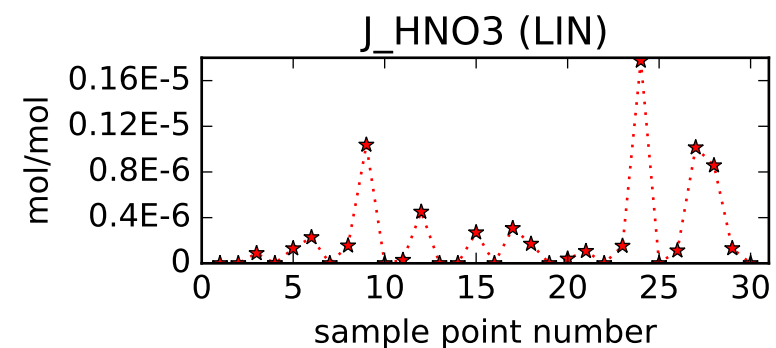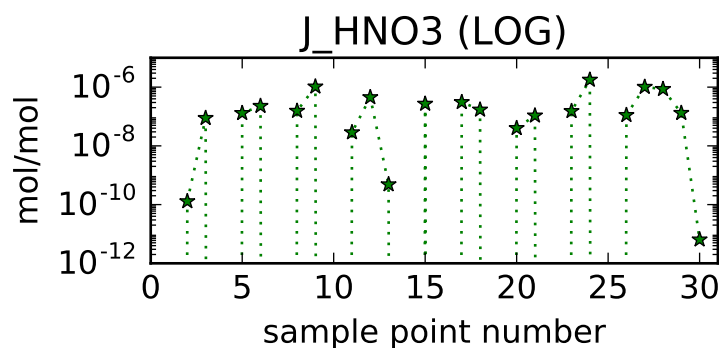



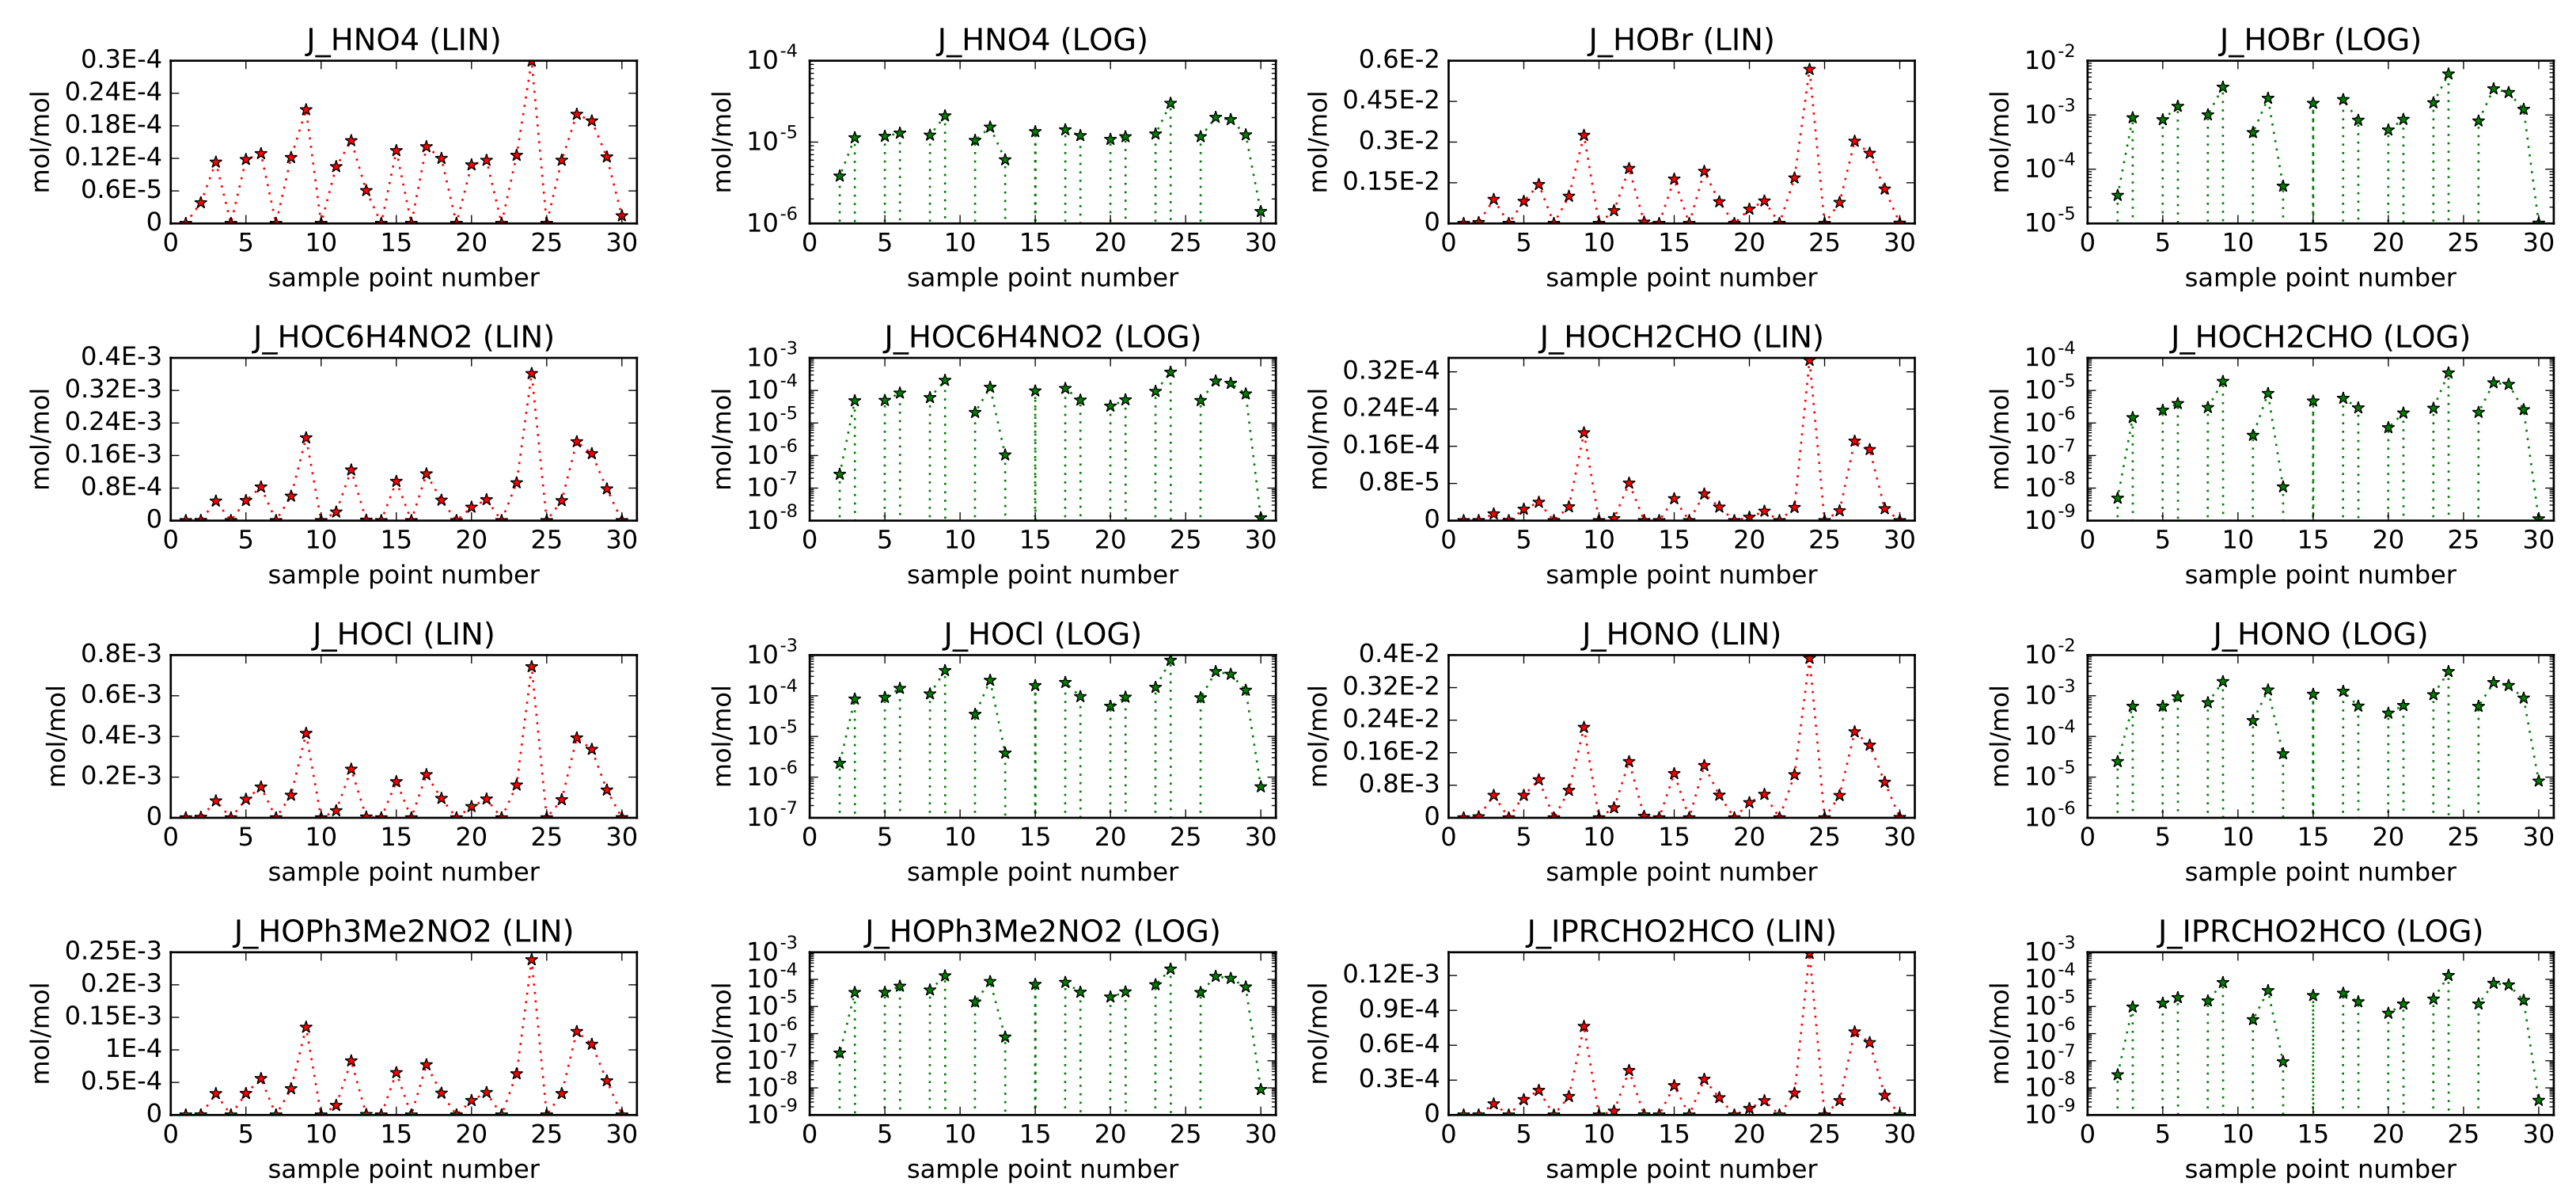

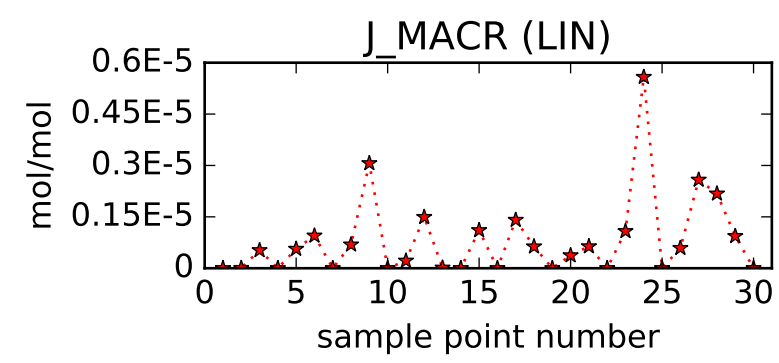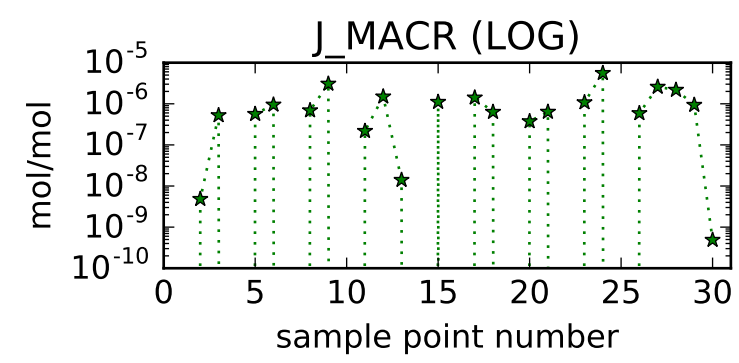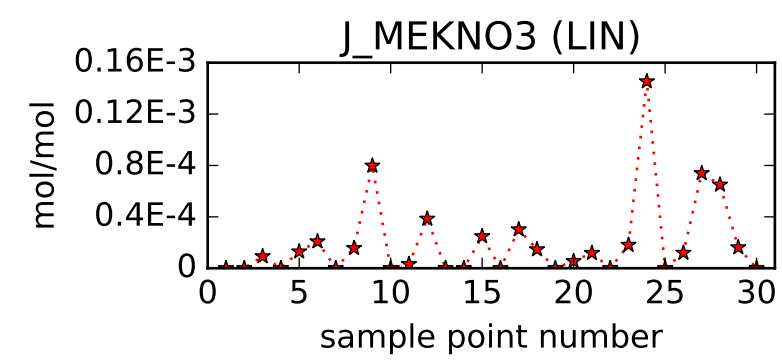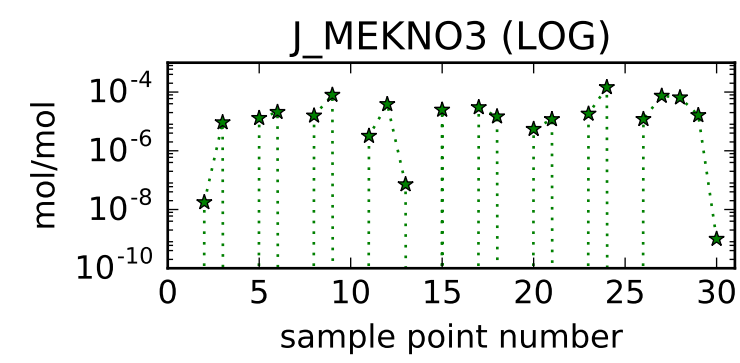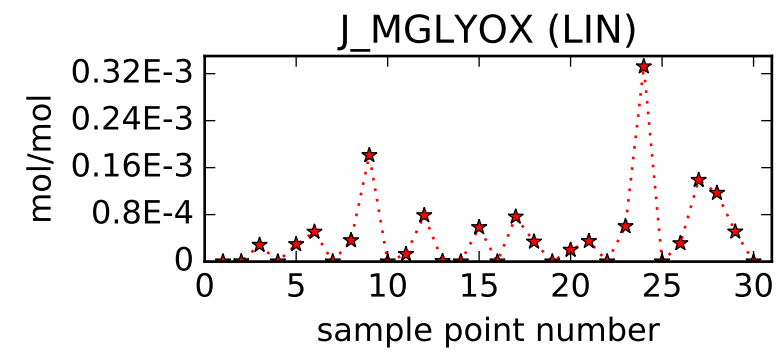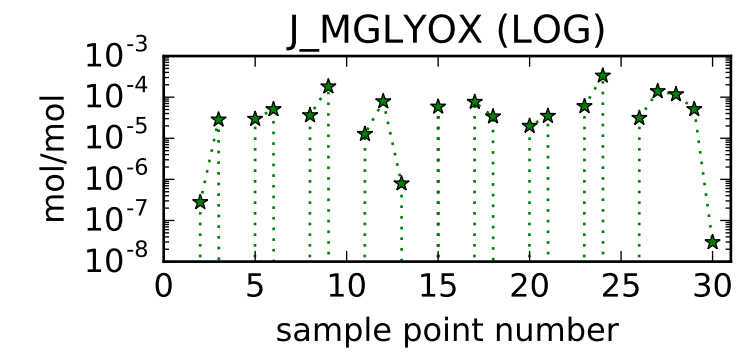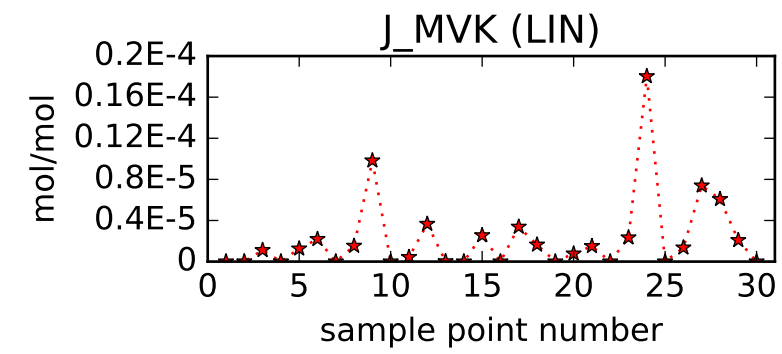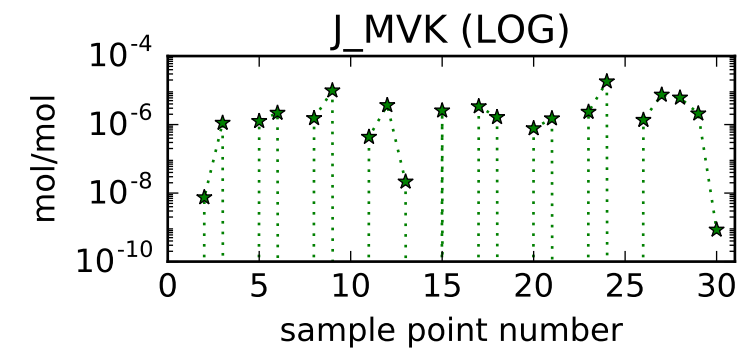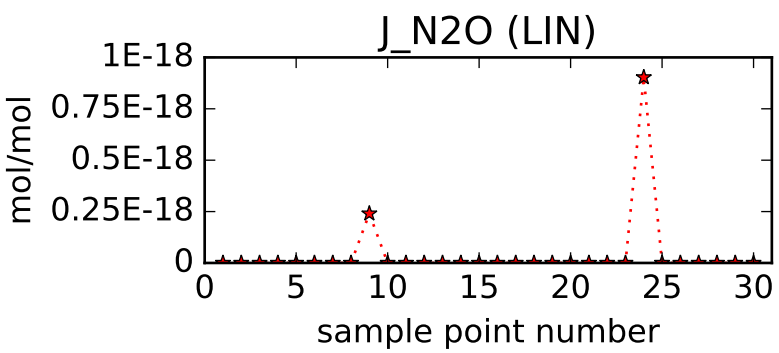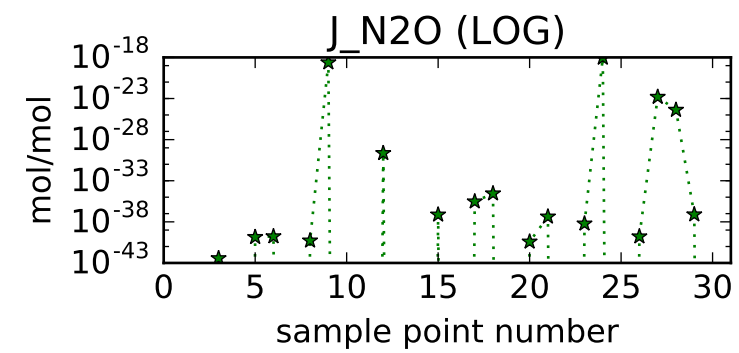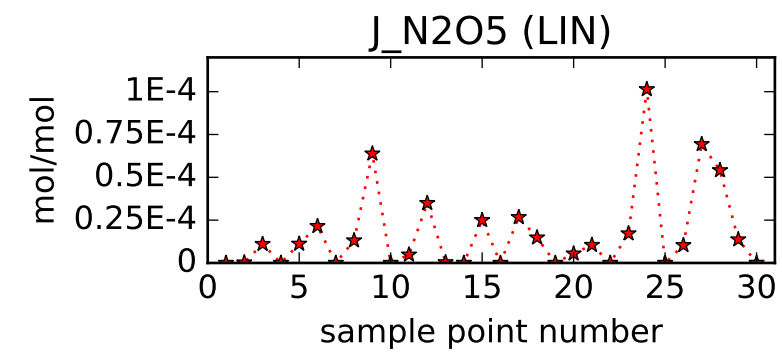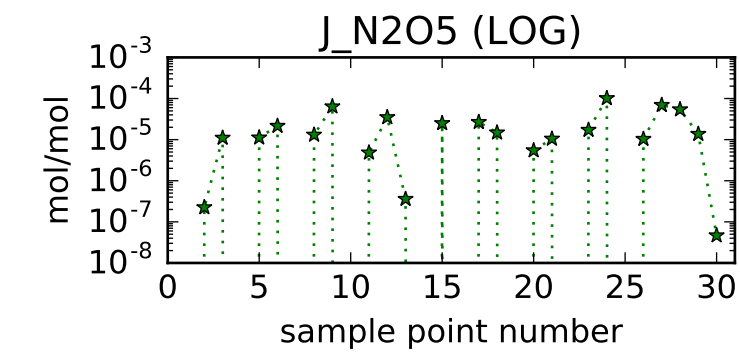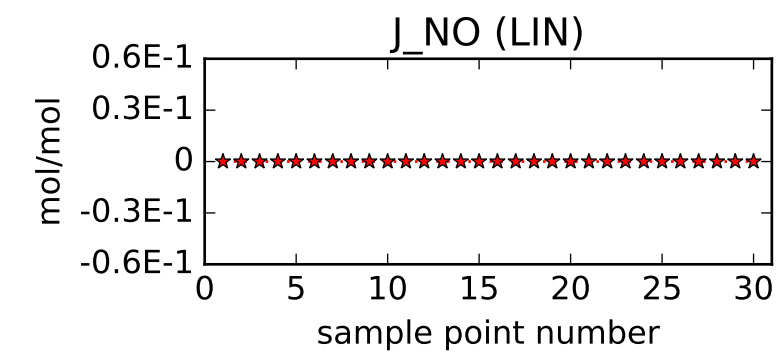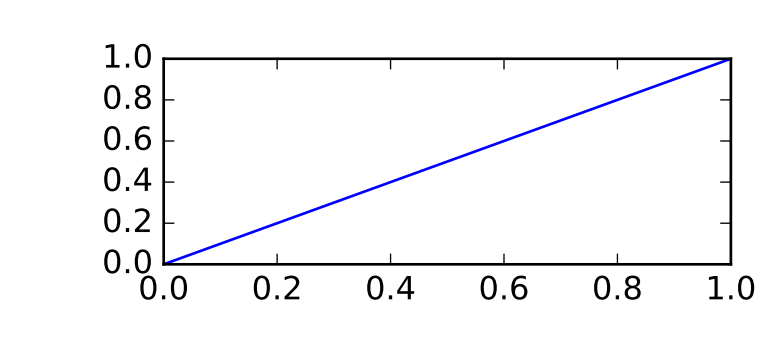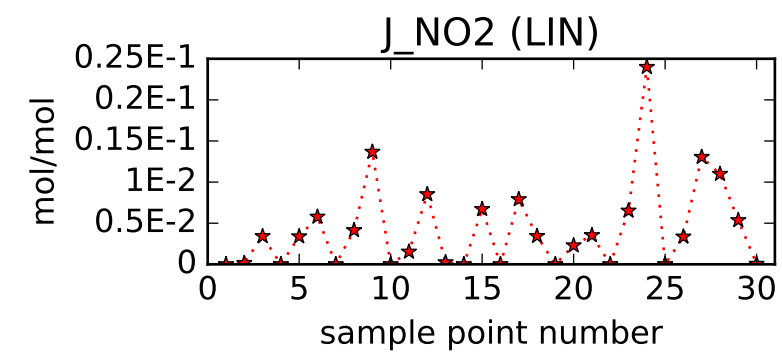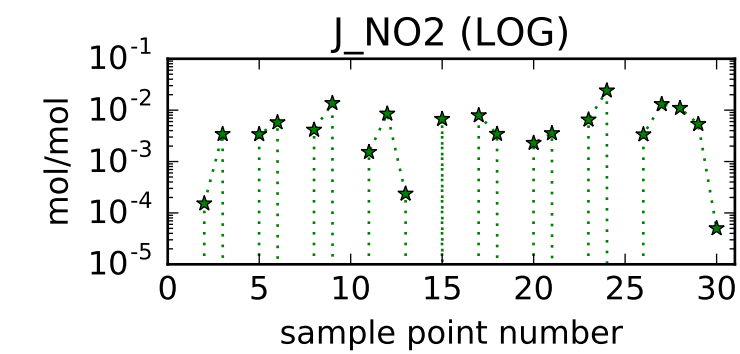

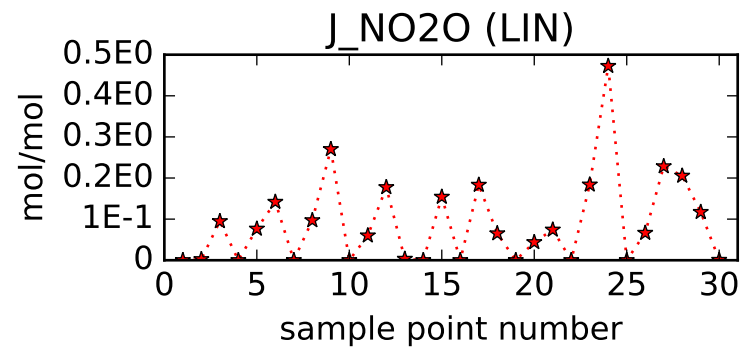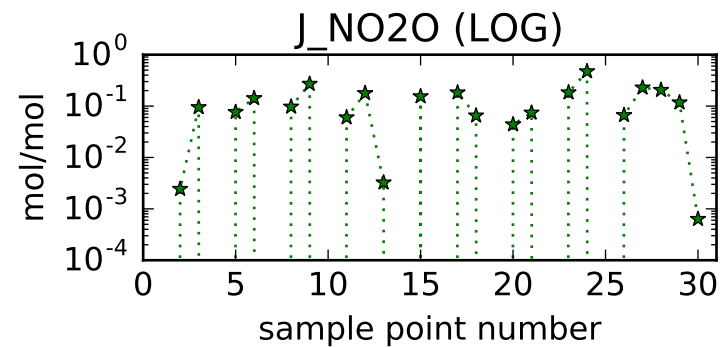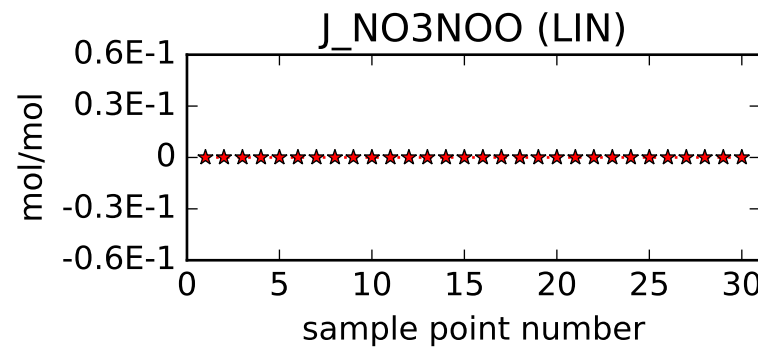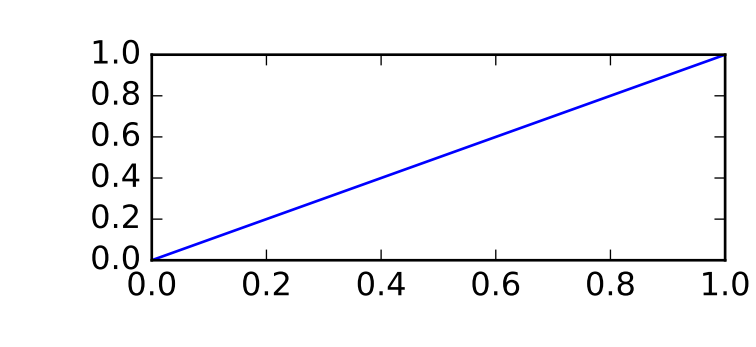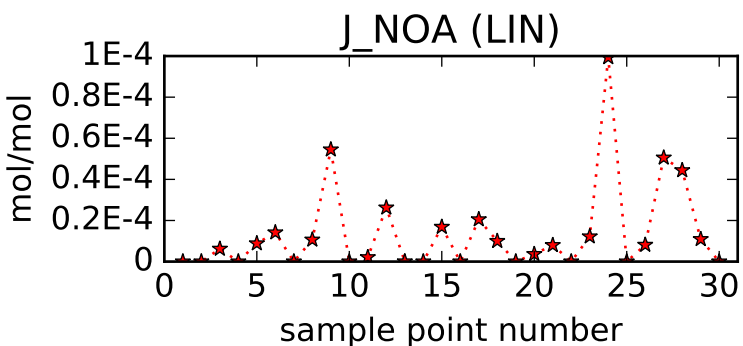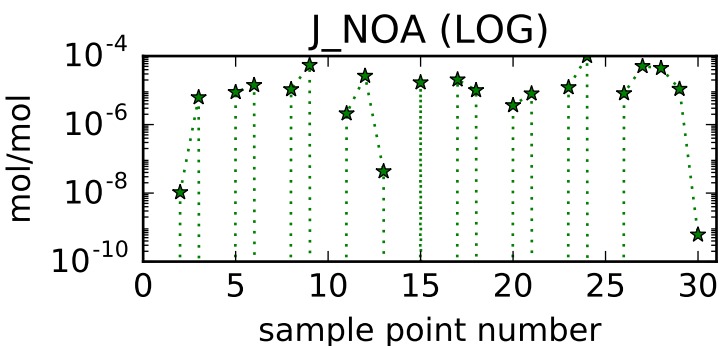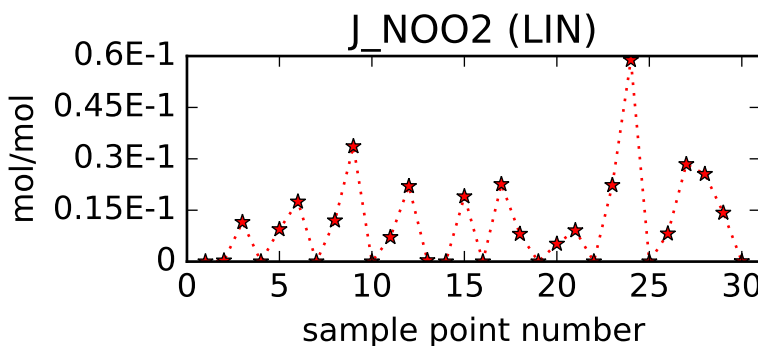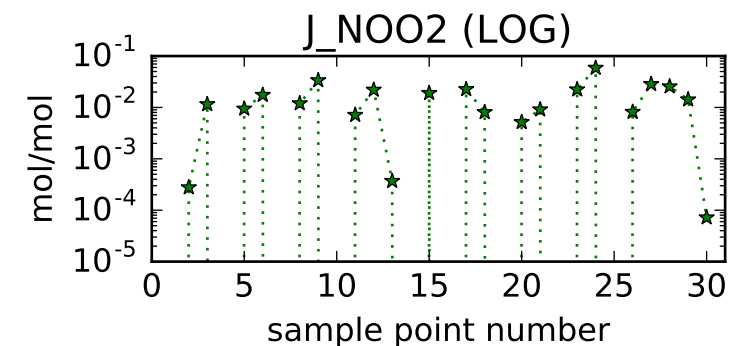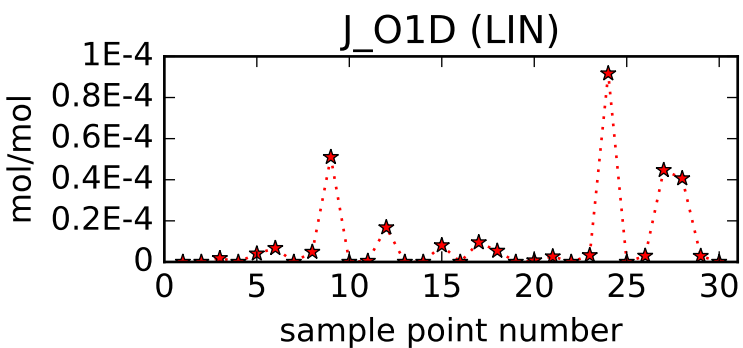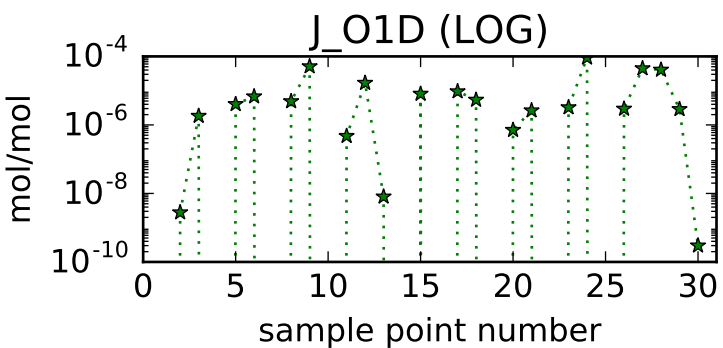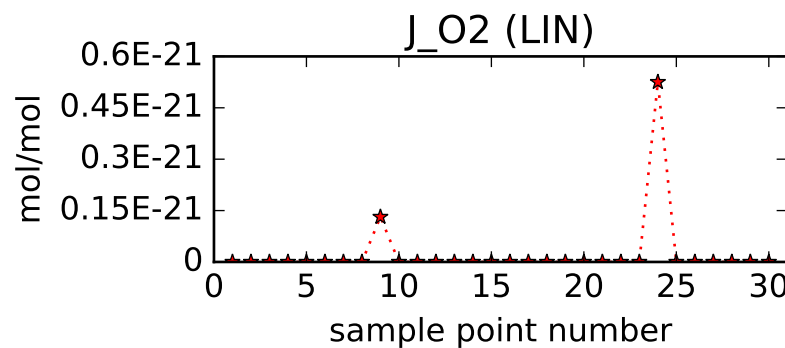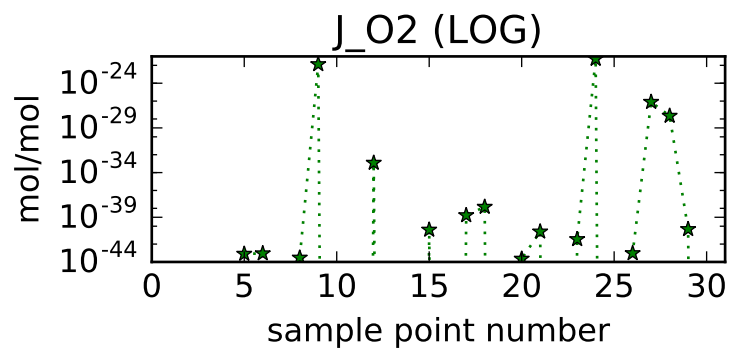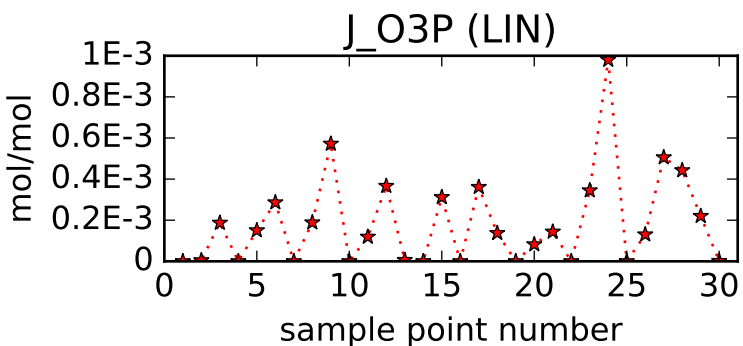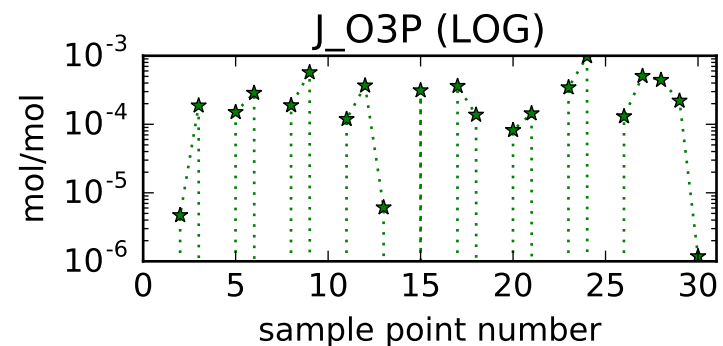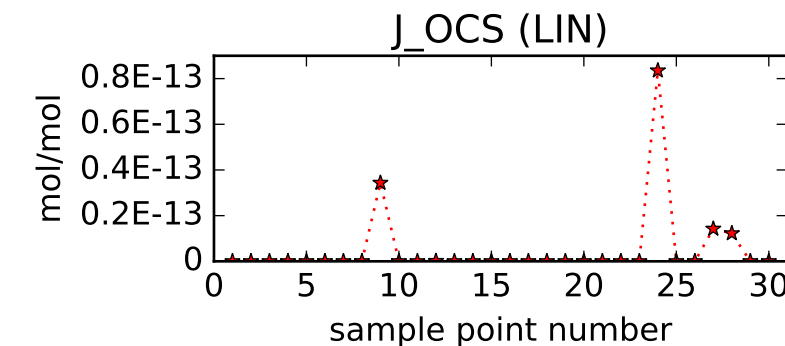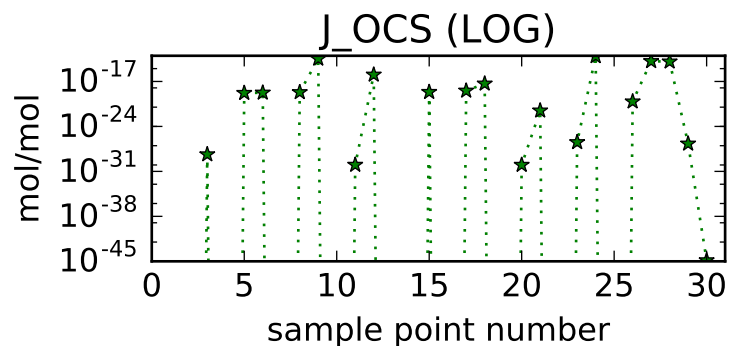

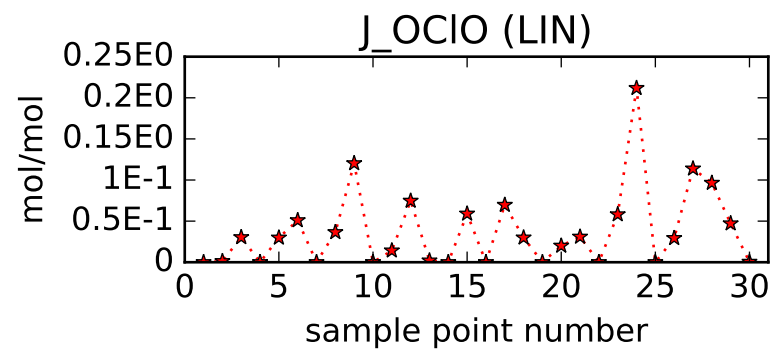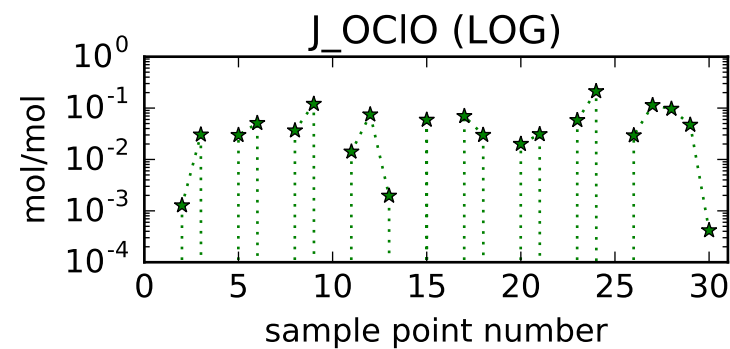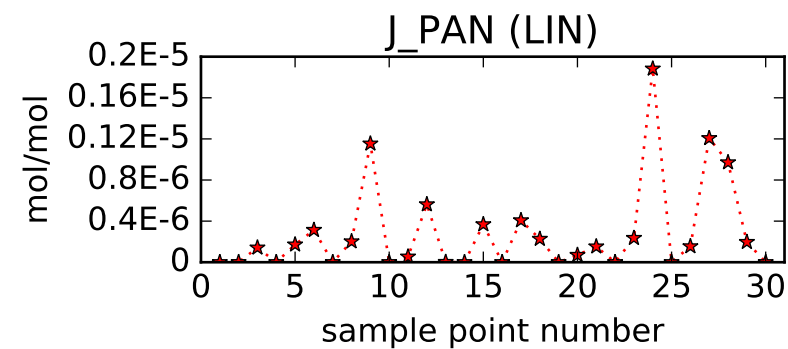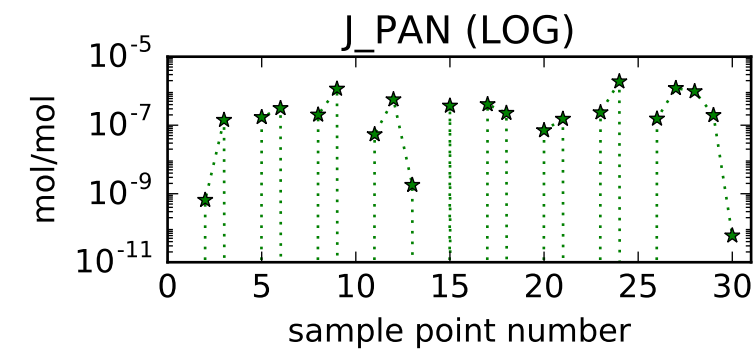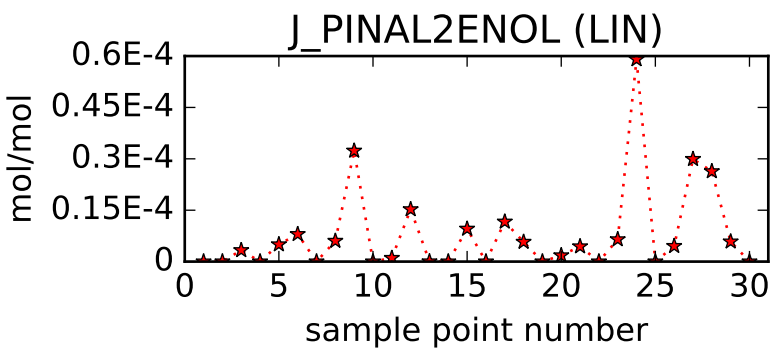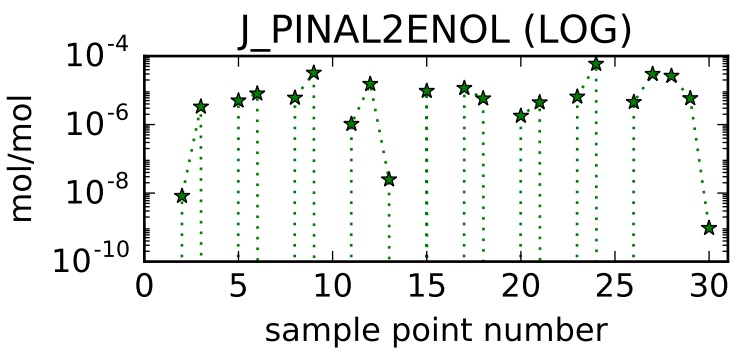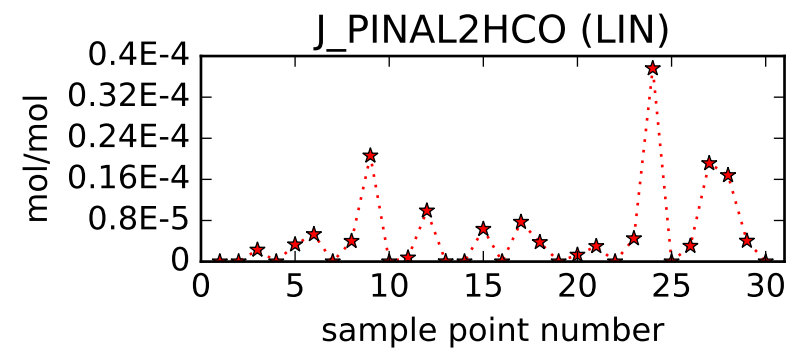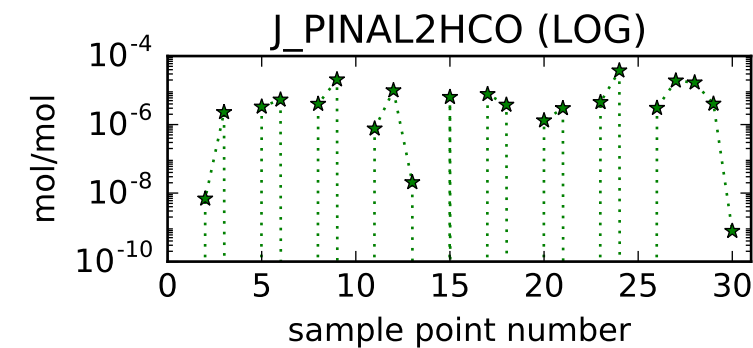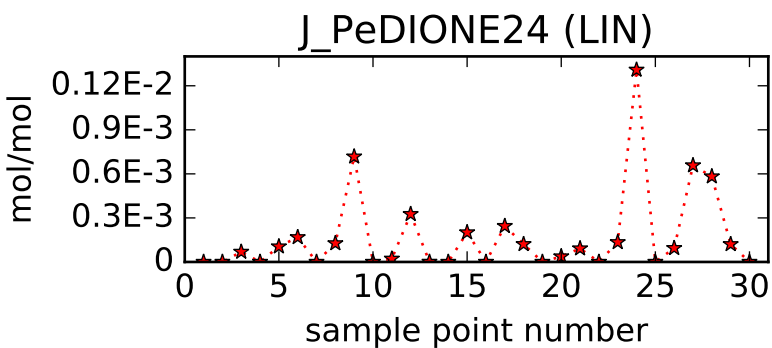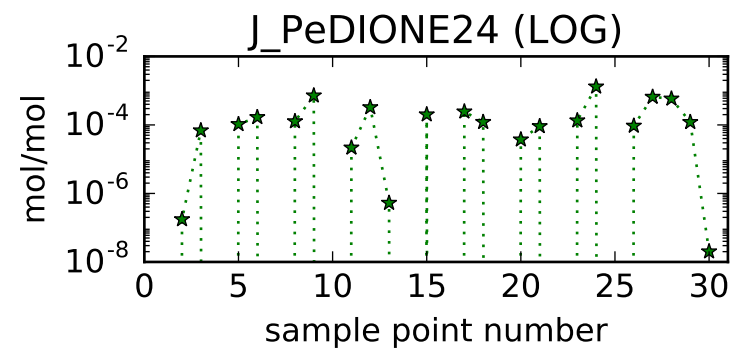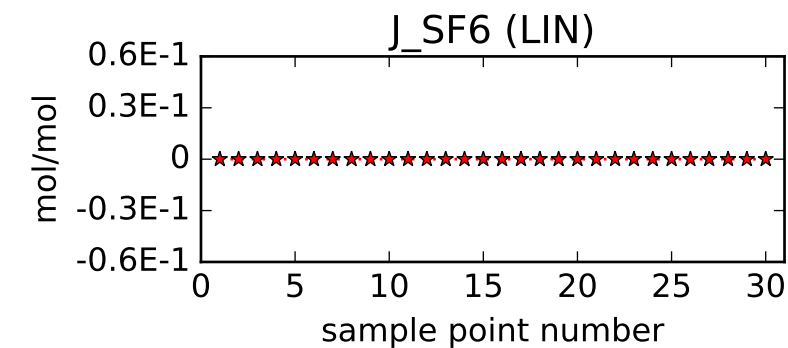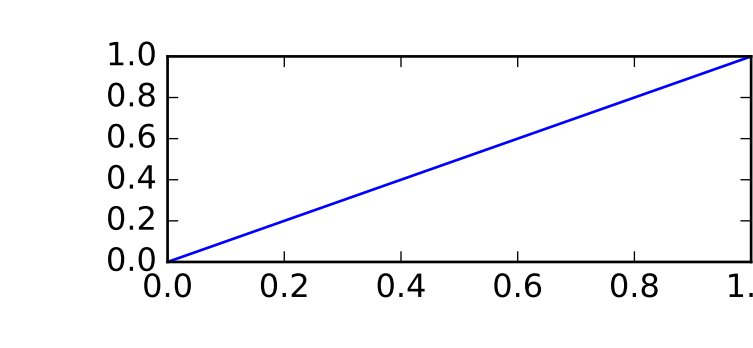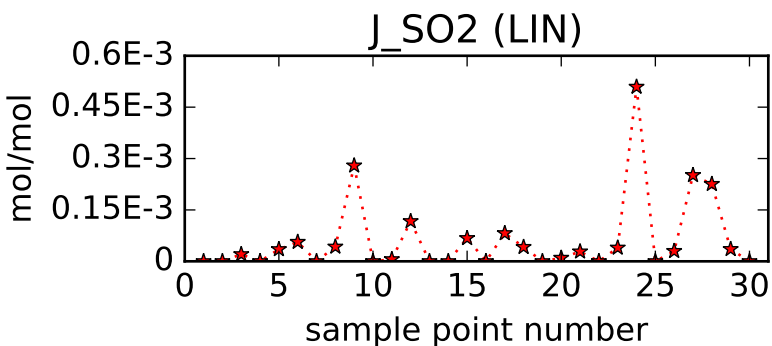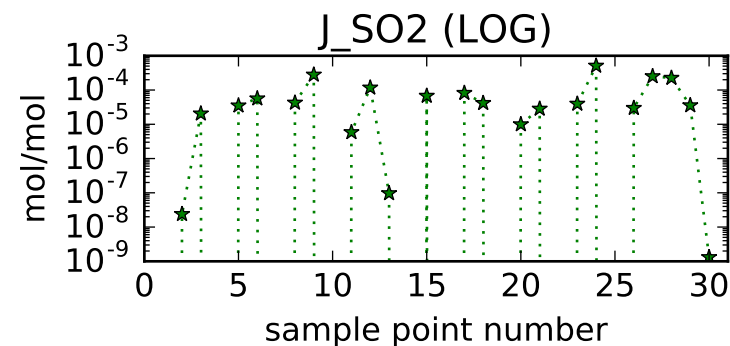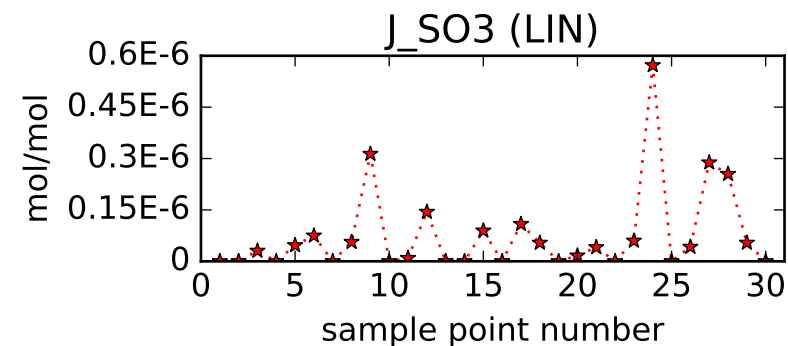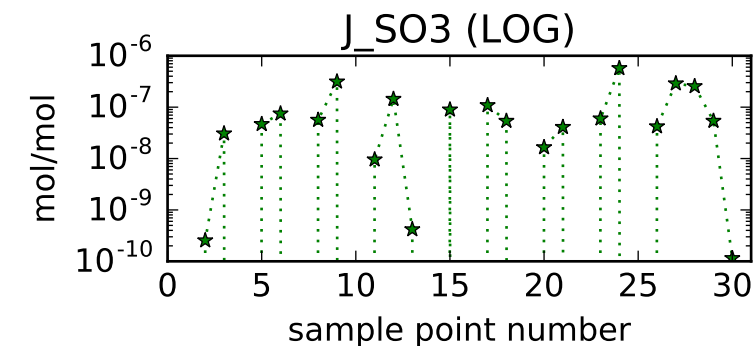

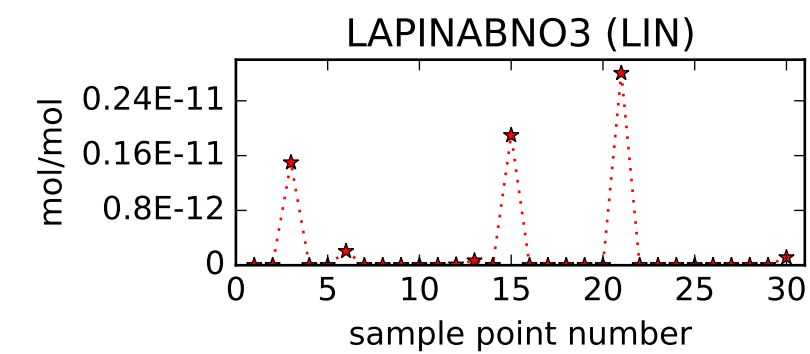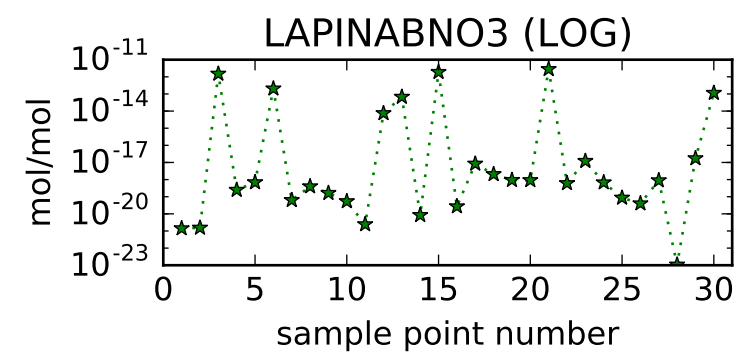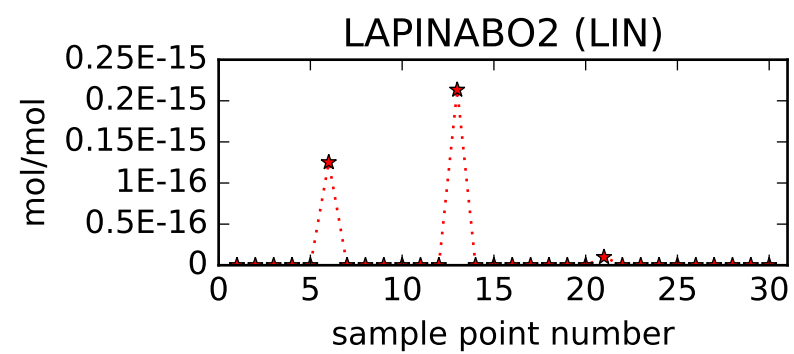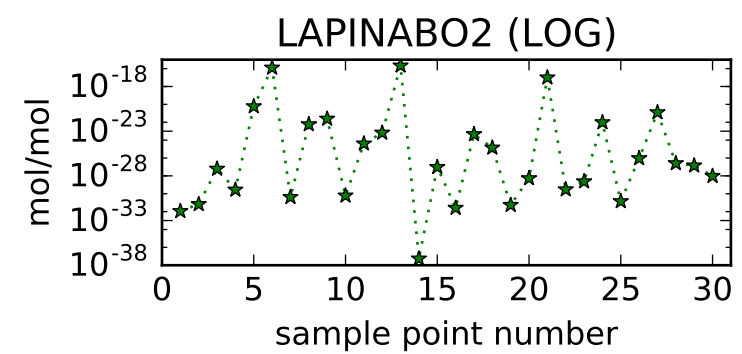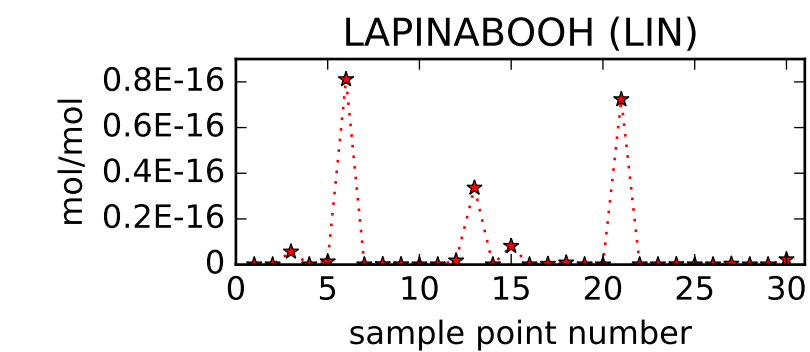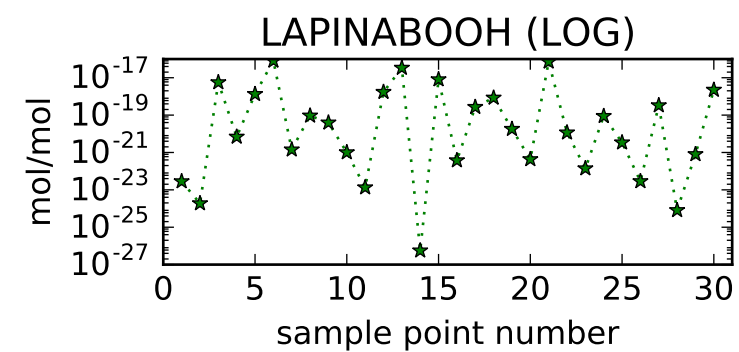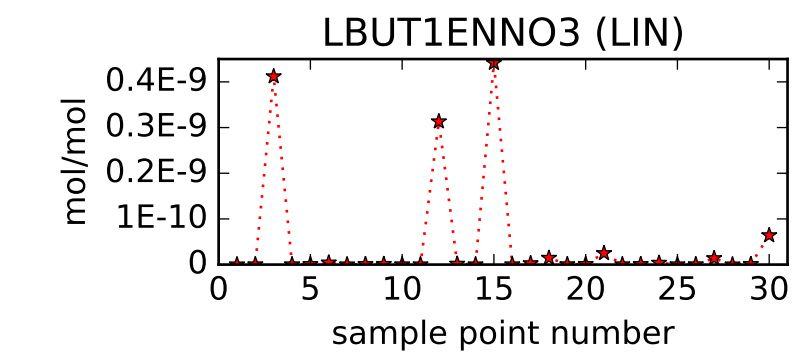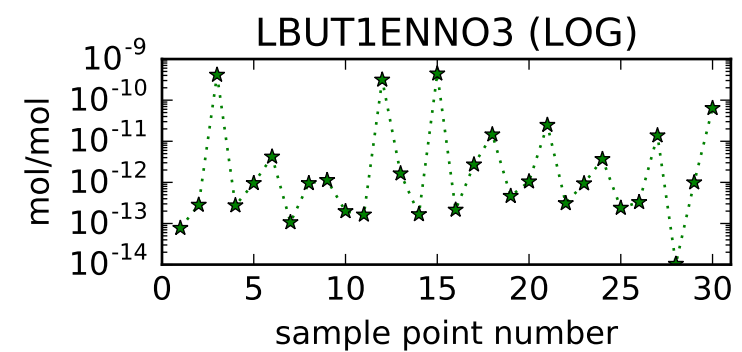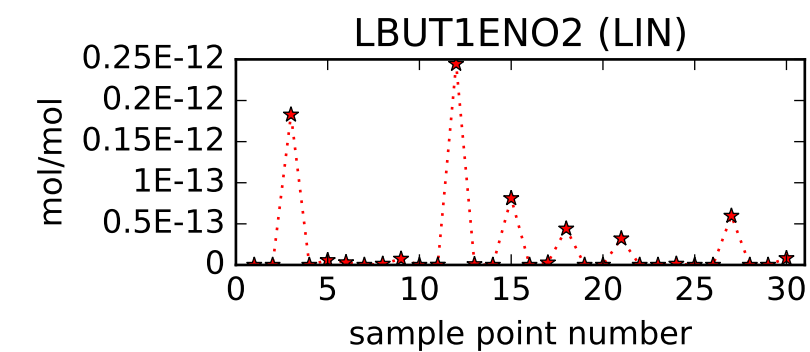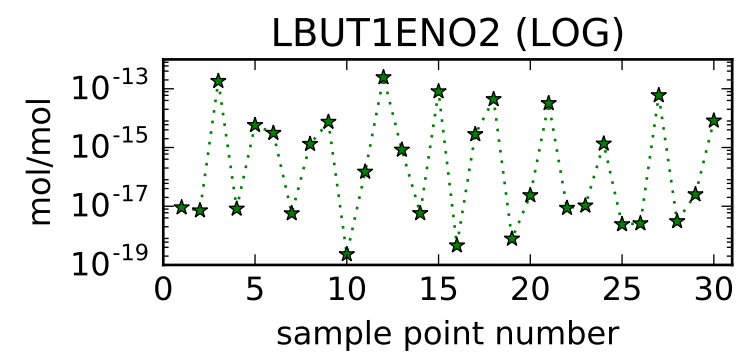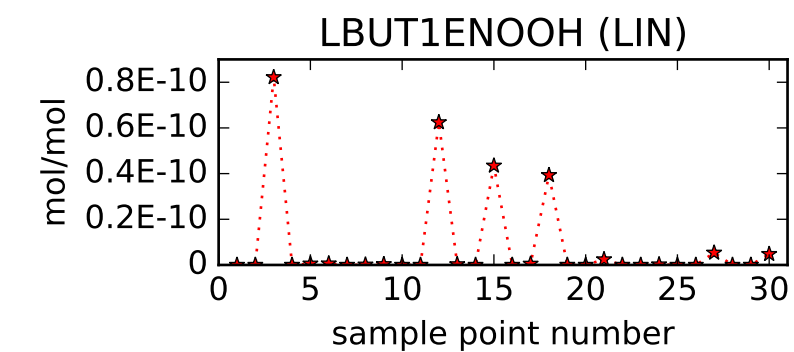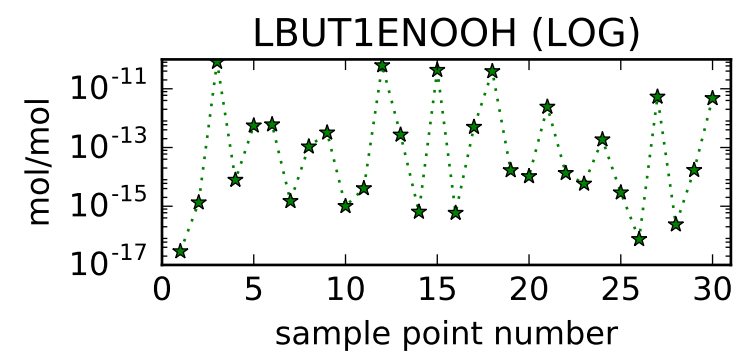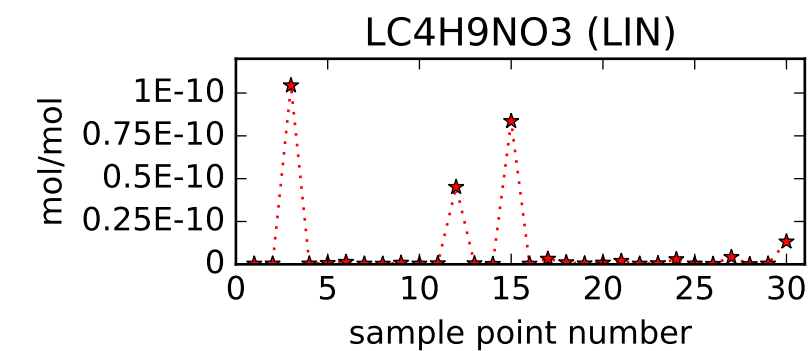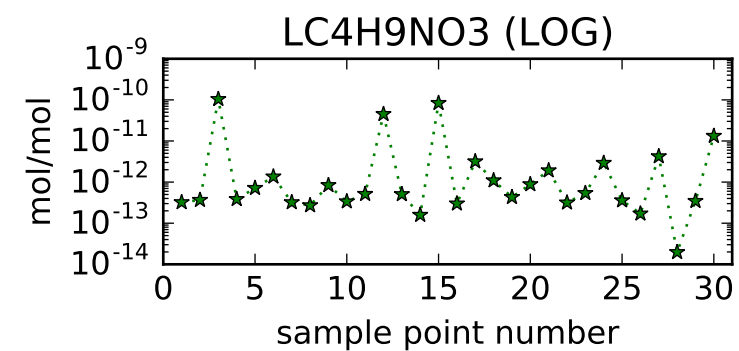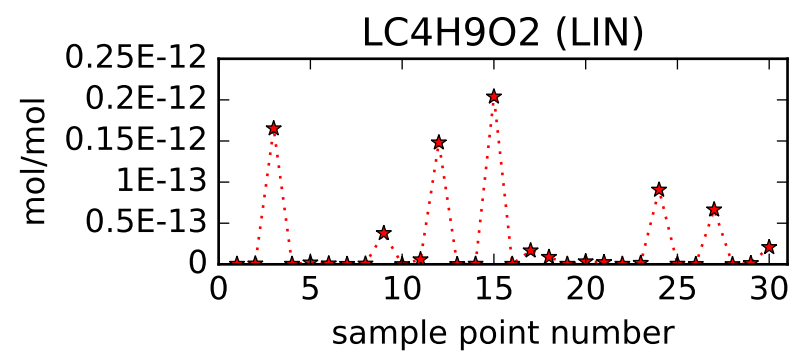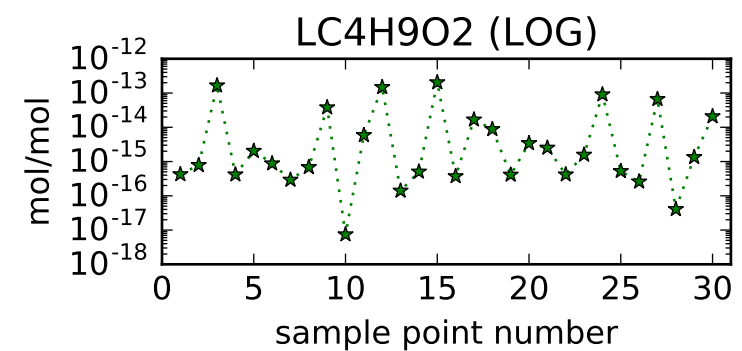



LC4H9OOH (LIN)

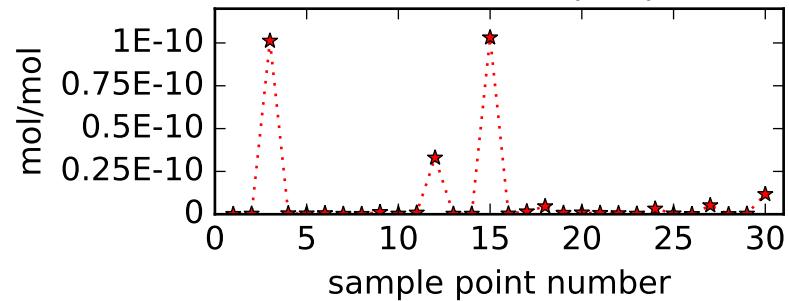

LC4H9OOH (LOG)

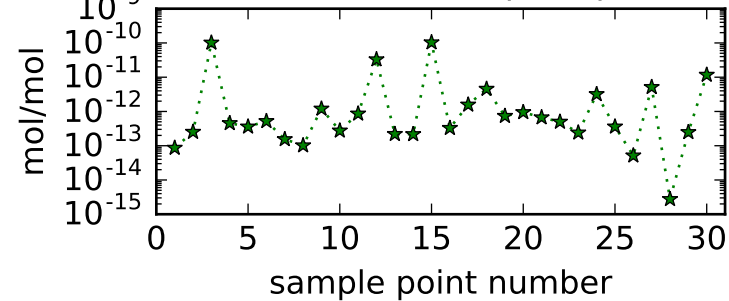

LC578O2 (LIN)

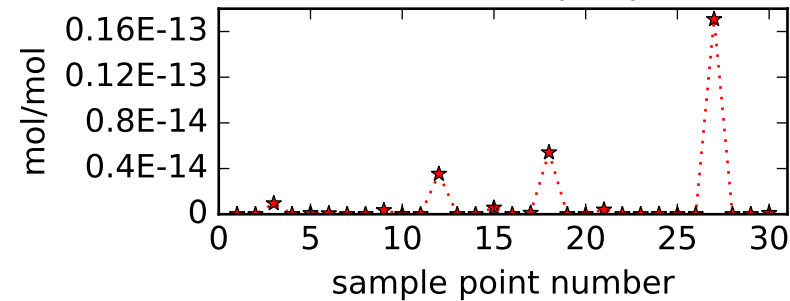

LC578O2 (LOG)

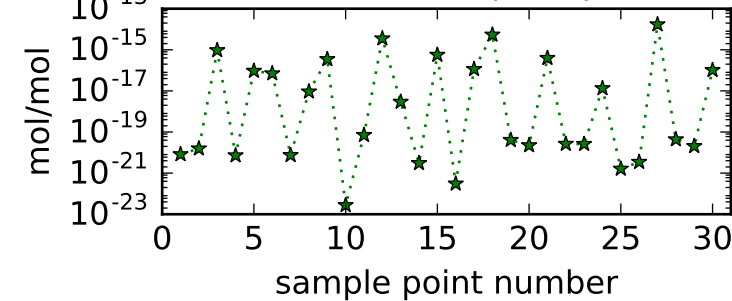

LC578OOH (LIN)

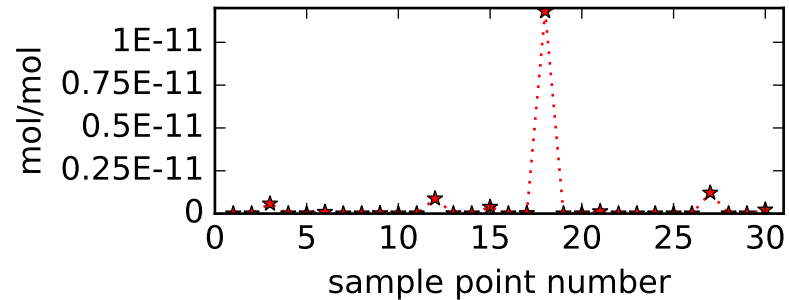

LC578OOH (LOG)

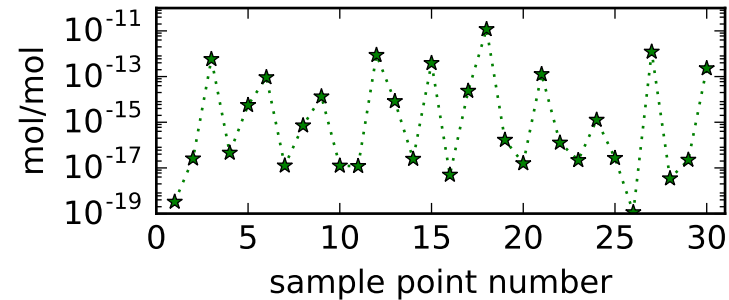

LC5PAN1719 (LIN)

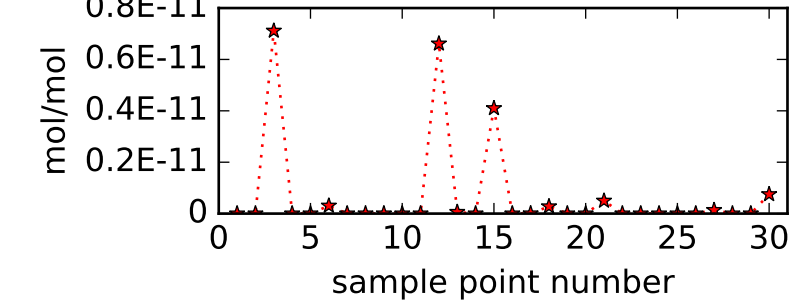

LC5PAN1719 (LOG)

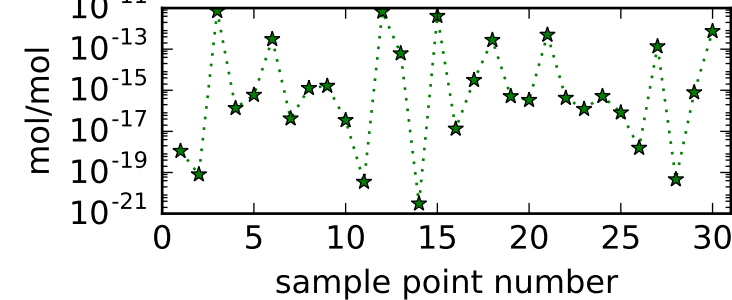

LCARBON (LIN)

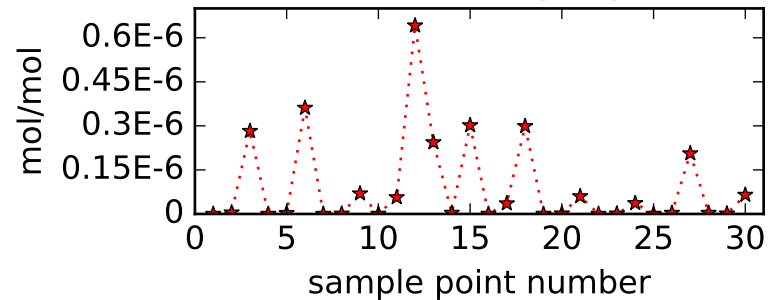

LCARBON (LOG)

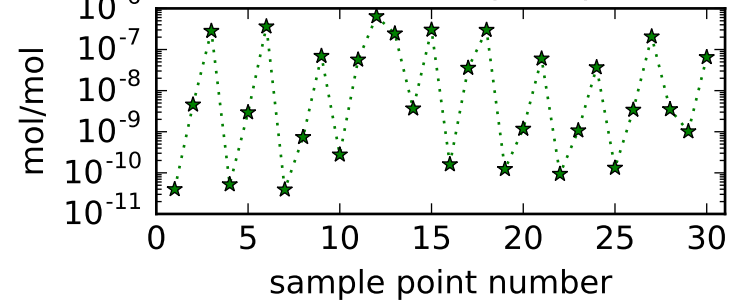

LDISOPACO (LIN)

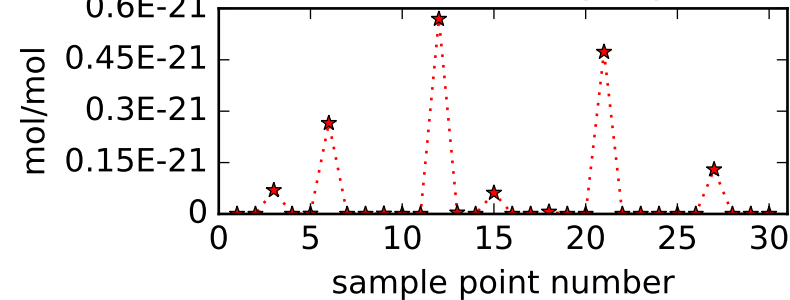

LDISOPACO (LOG)

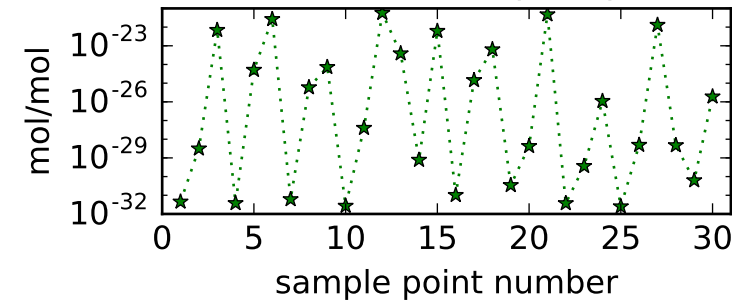

LDISOPACO2 (LIN)

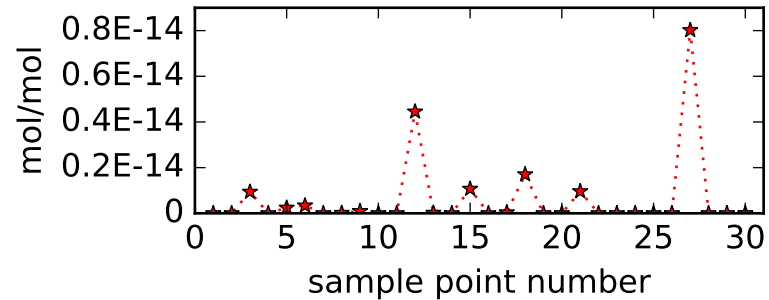

LDISOPACO2 (LOG)

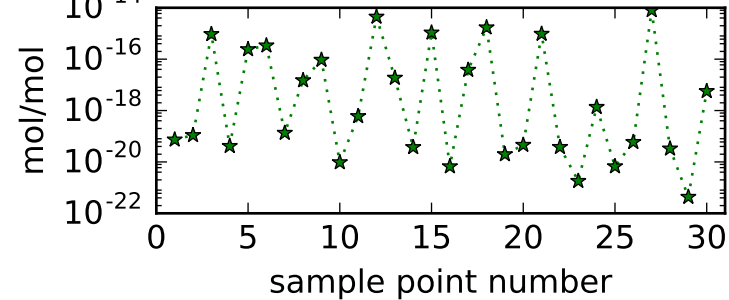

LHAROM (LIN)

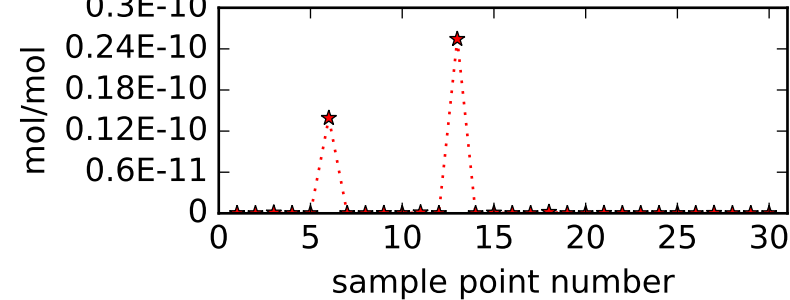

LHAROM (LOG)

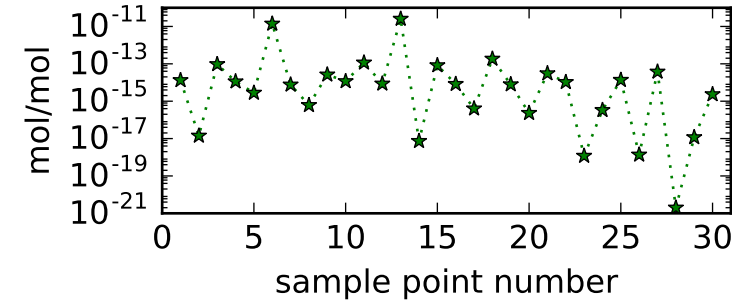

LHC4ACCHO (LIN)

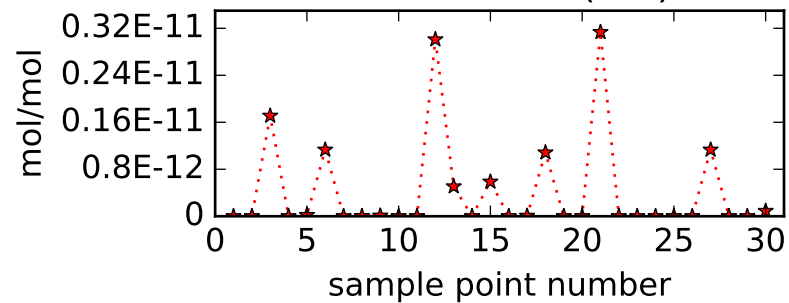

LHC4ACCHO (LOG)

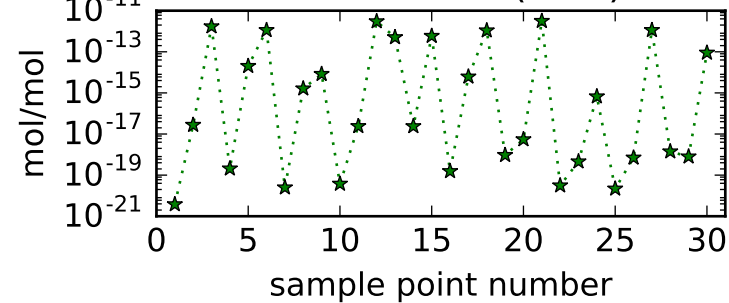

LHC4ACCO2H (LIN)

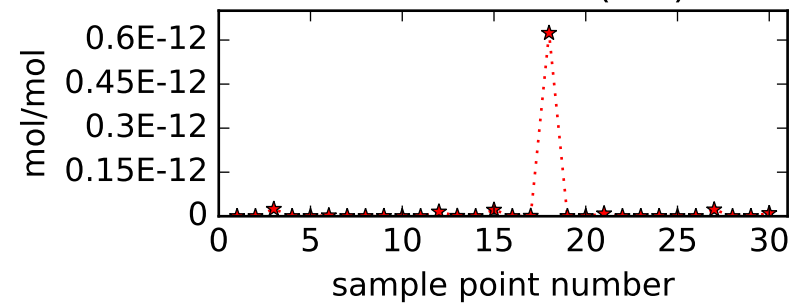

LHC4ACCO2H (LOG)

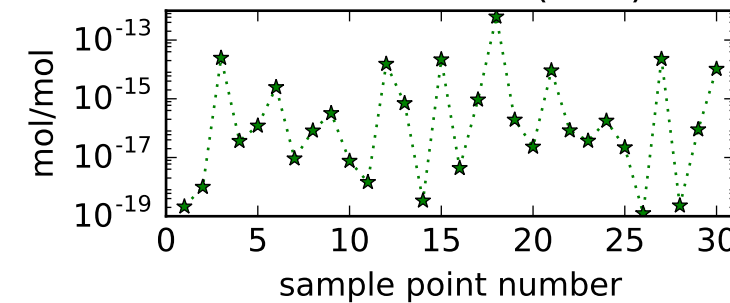

LHC4ACCO3 (LIN)

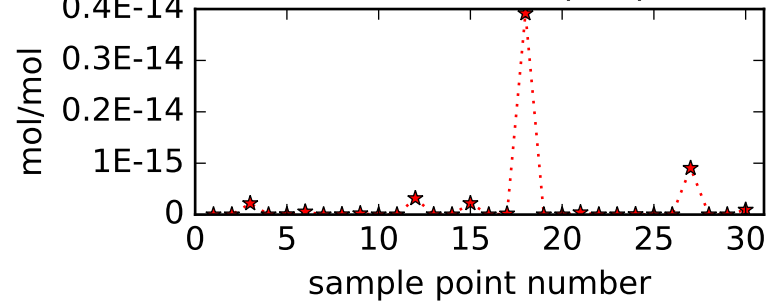

LHC4ACCO3 (LOG)

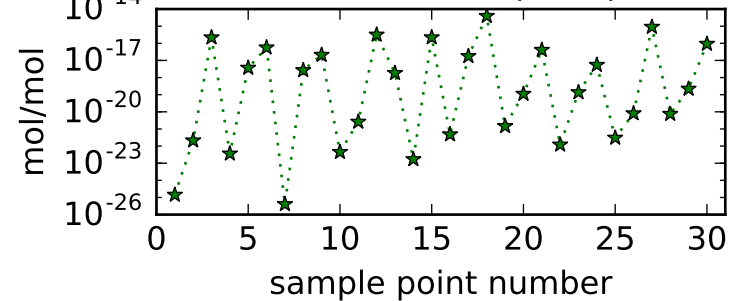

LHC4ACCO3H (LIN)

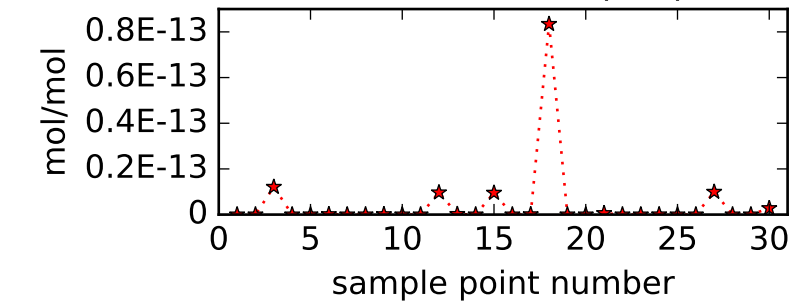

LHC4ACCO3H (LOG)

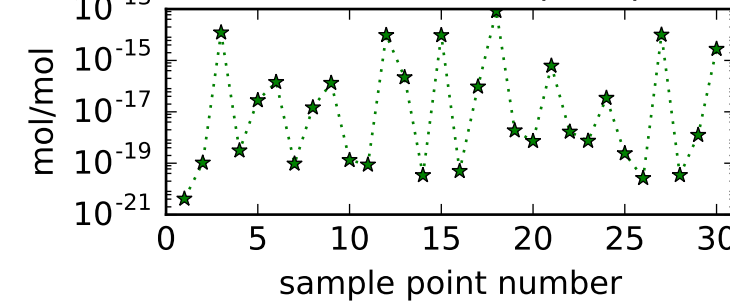

LHMVKABO2 (LIN)

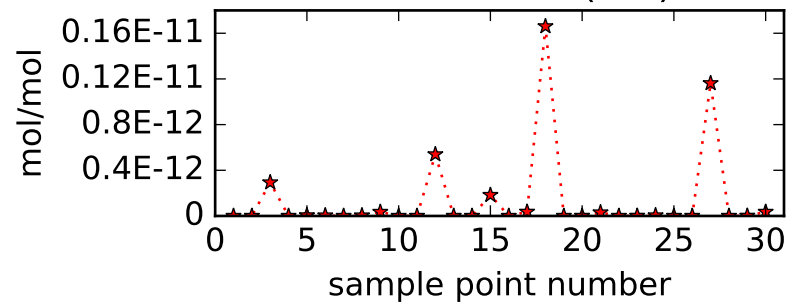

LHMVKABO2 (LOG)

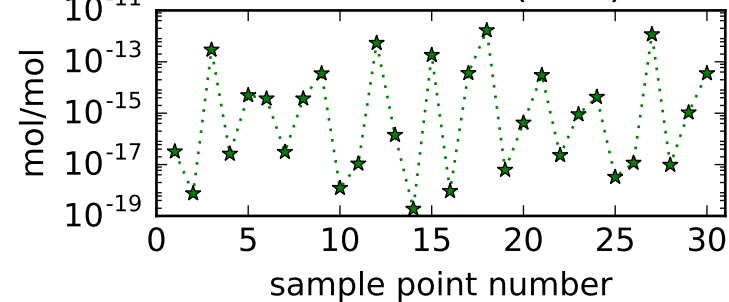

LHMVKABOOH (LIN)

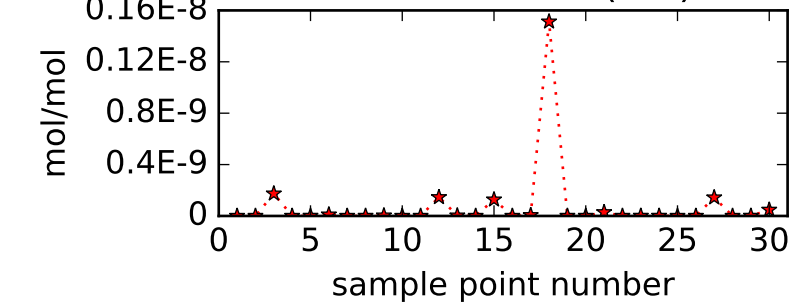

LHMVKABOOH (LOG)

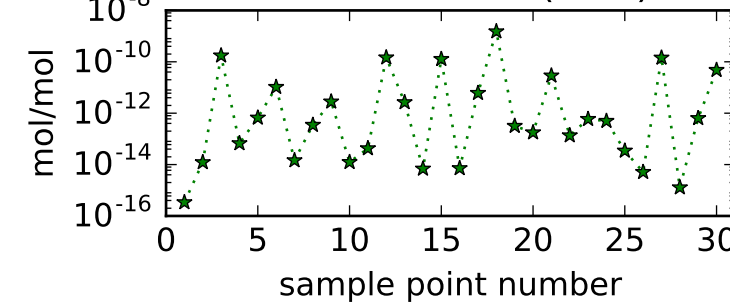

LIEPOX (LIN)

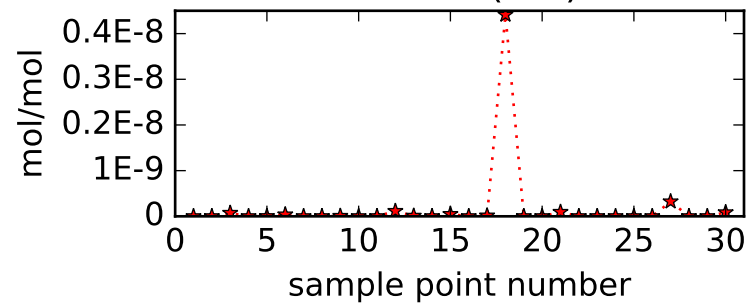

LIEPOX (LOG)

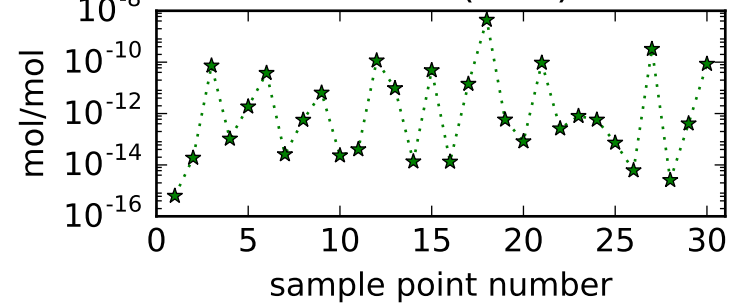

LISOPACNO3 (LIN)

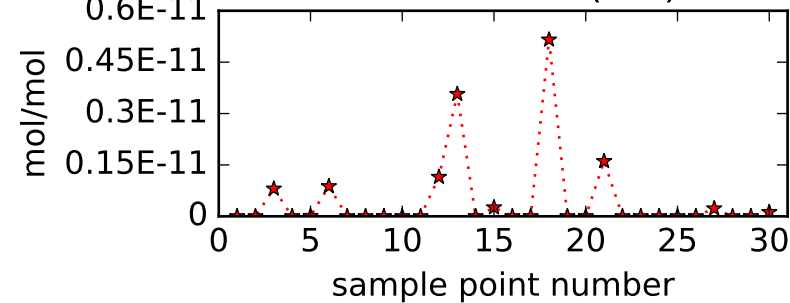

LISOPACNO3 (LOG)

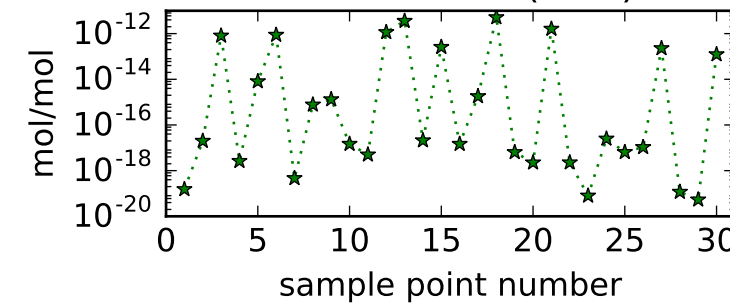

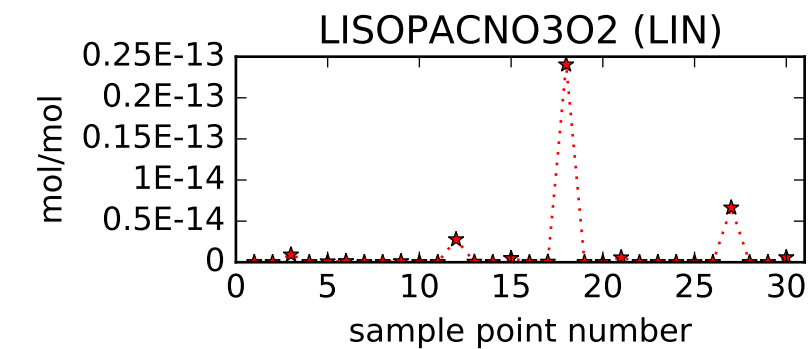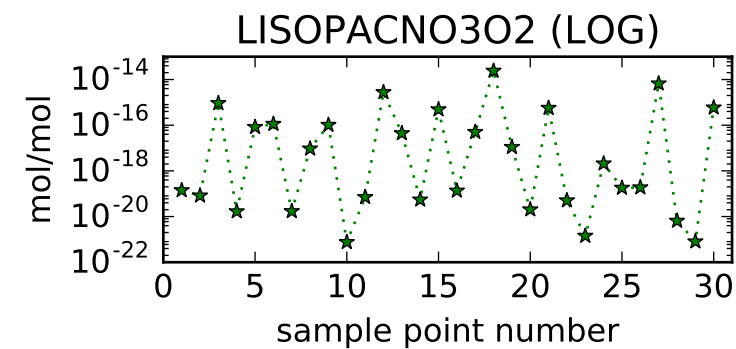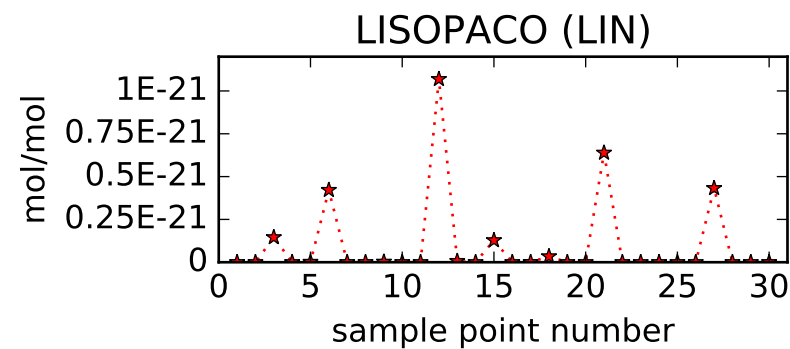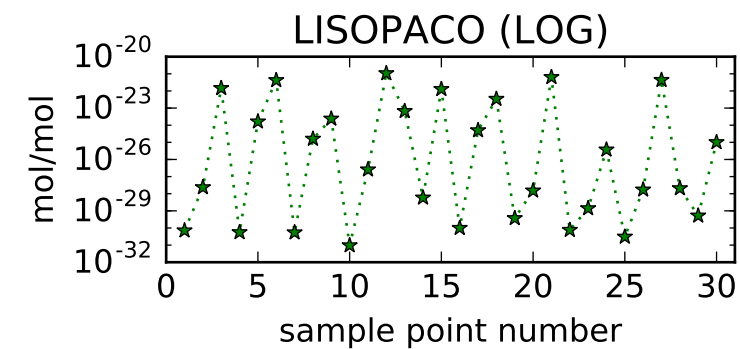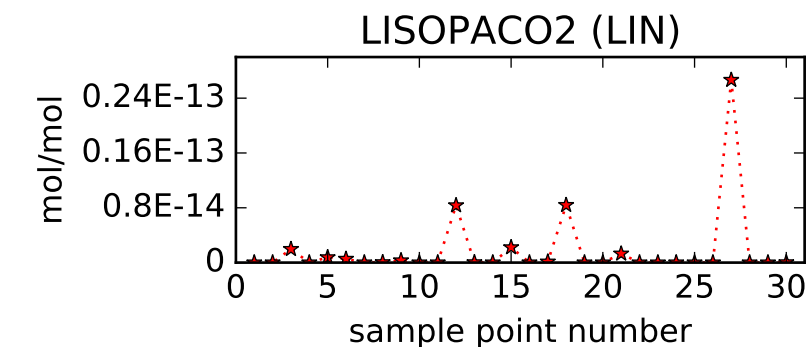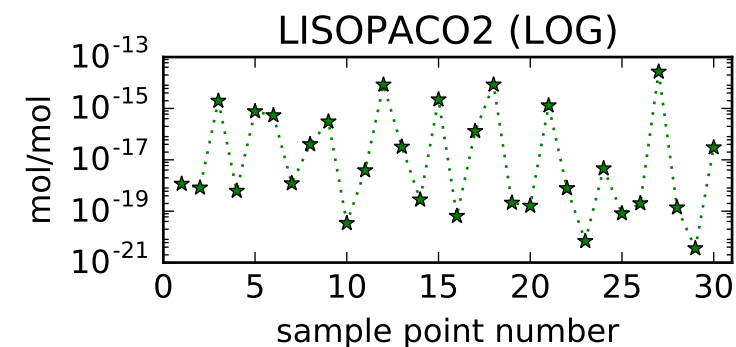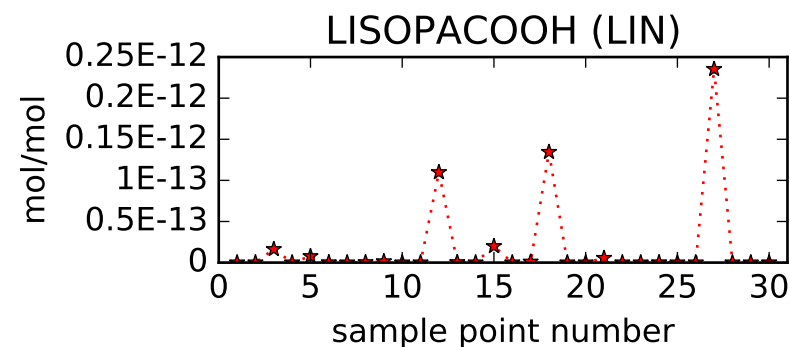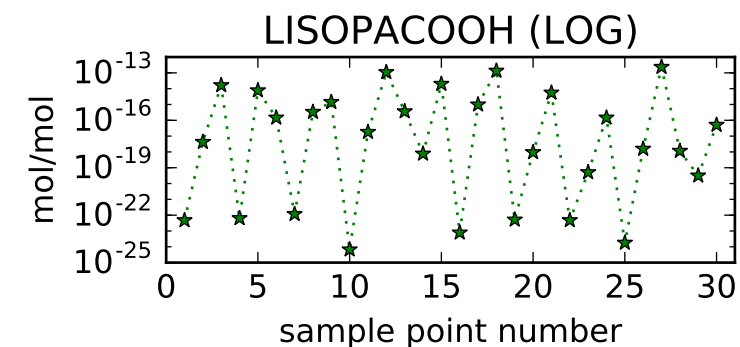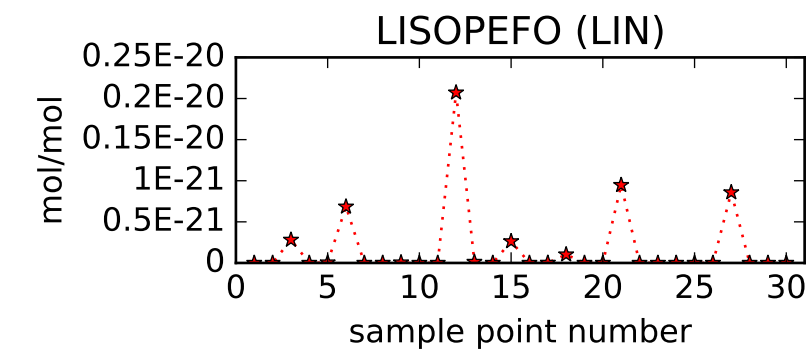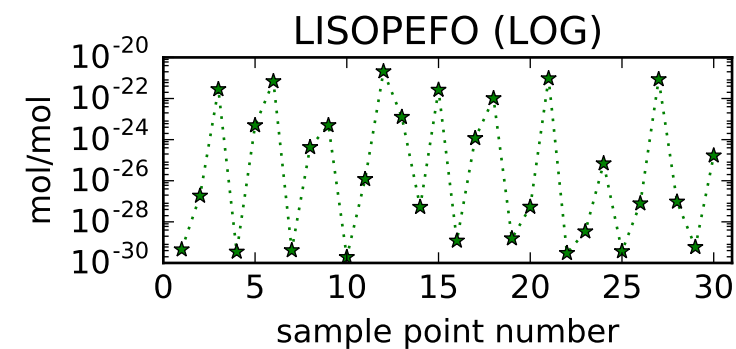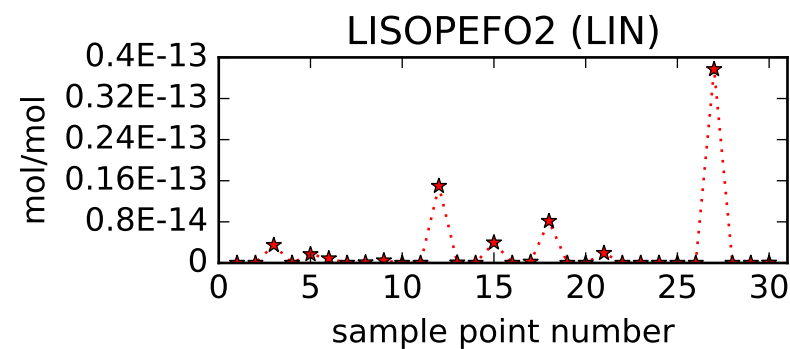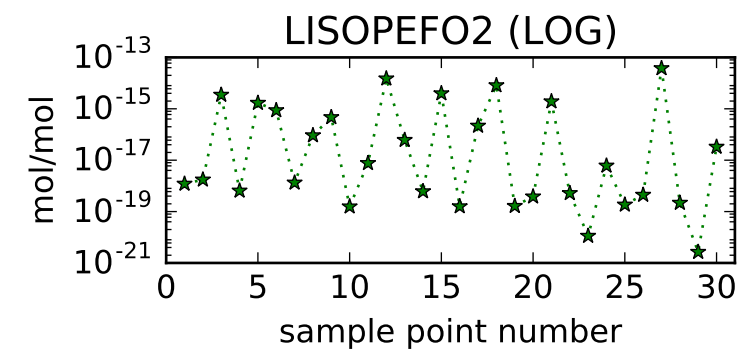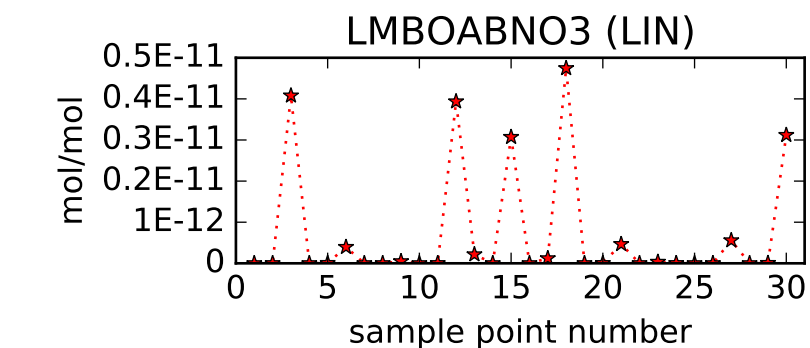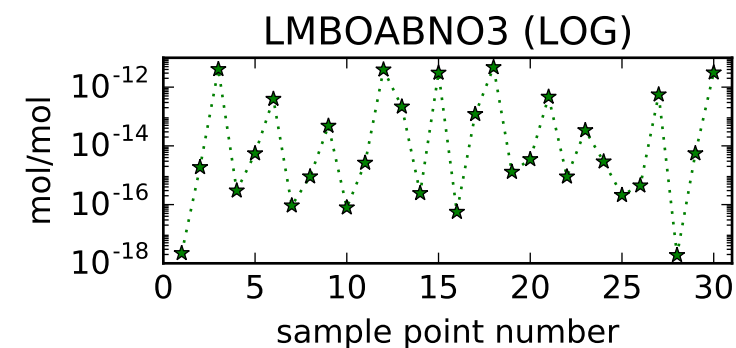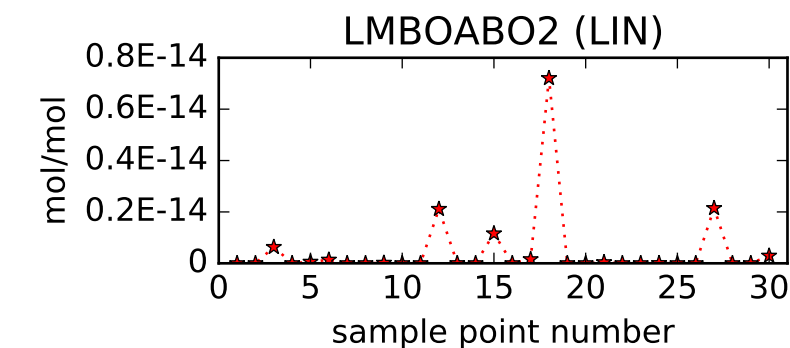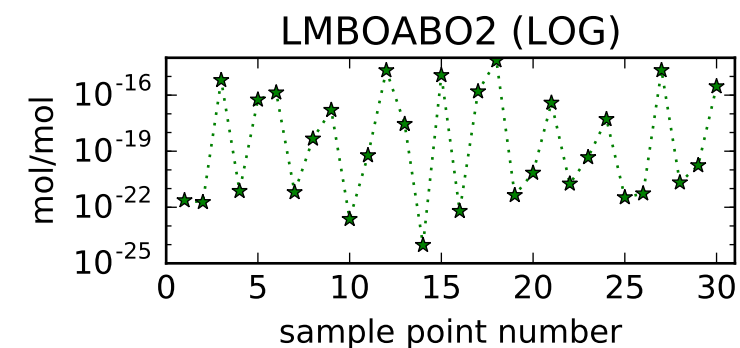

LMBOABOOH (LIN)

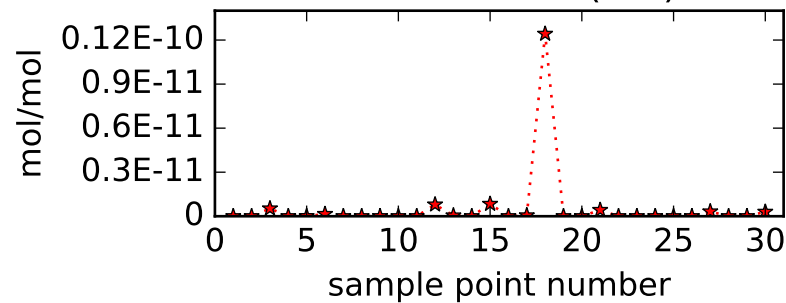

LMBOABOOH (LOG)

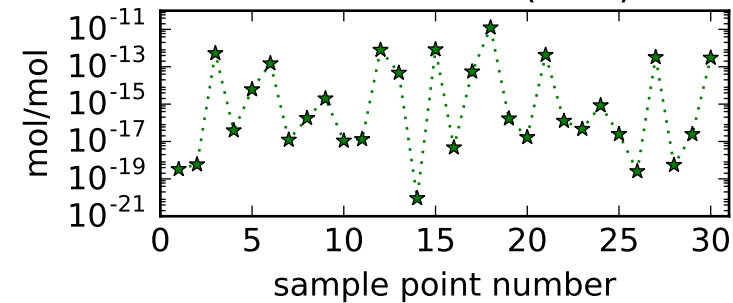

LME3FURANO2 (LIN)

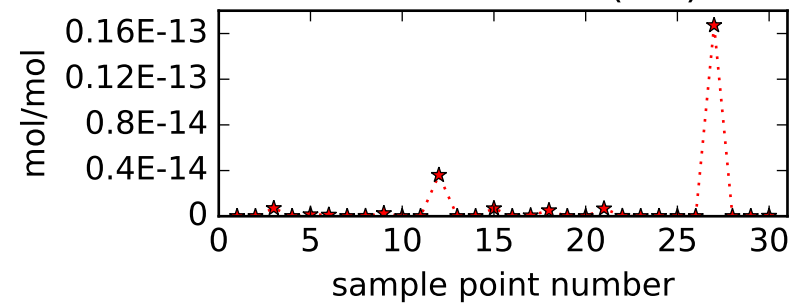

LME3FURANO2 (LOG)

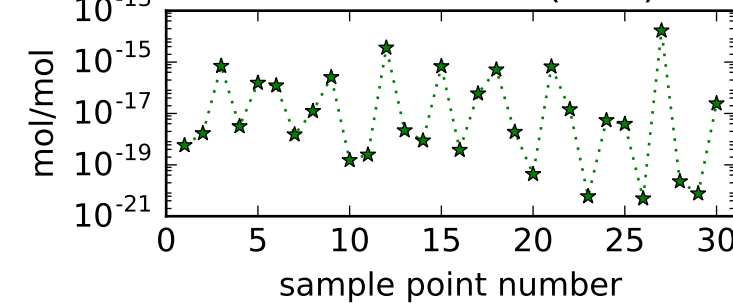

LMEKNO3 (LIN)

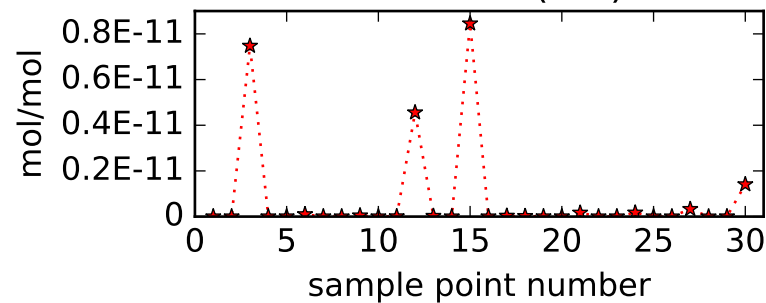

LMEKNO3 (LOG)

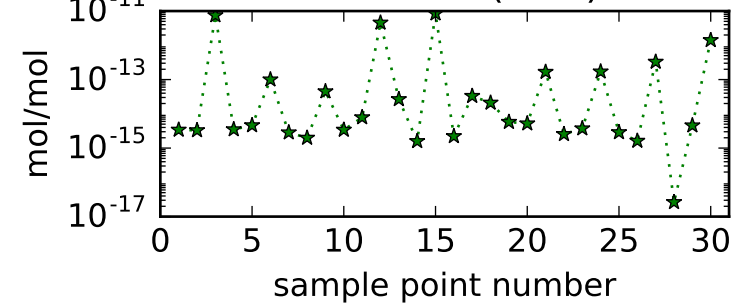

LMEKO2 (LIN)

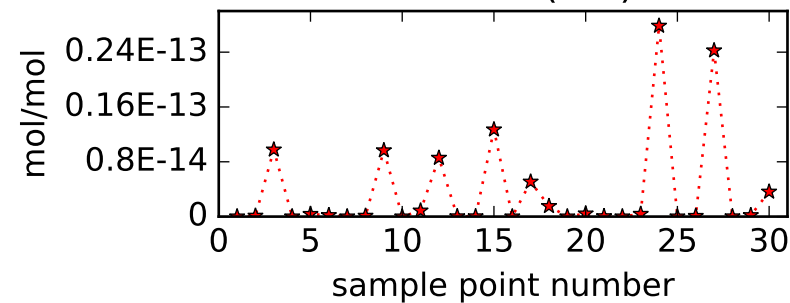

LMEKO2 (LOG)

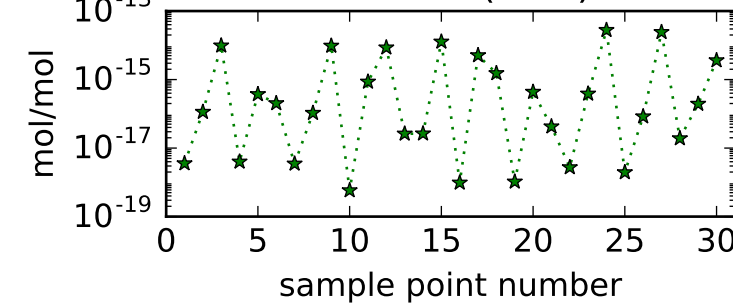

LMEKOOH (LIN)

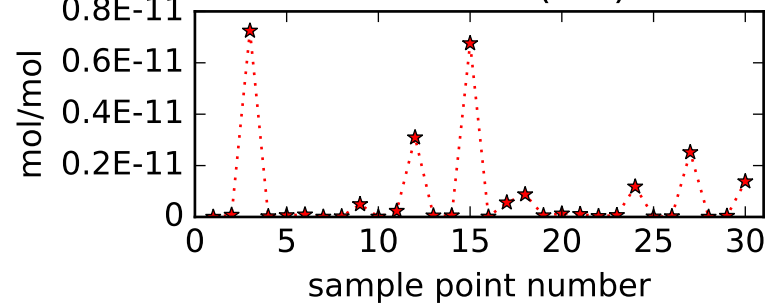

LMEKOOH (LOG)

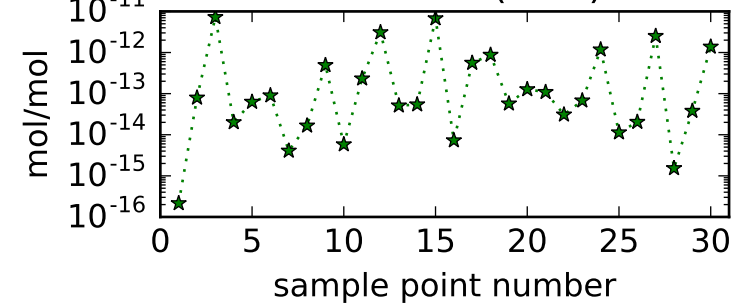

LNAPINABO2 (LIN)

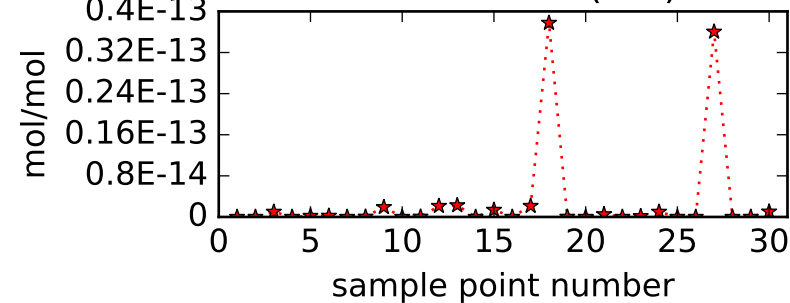

LNAPINABO2 (LOG)

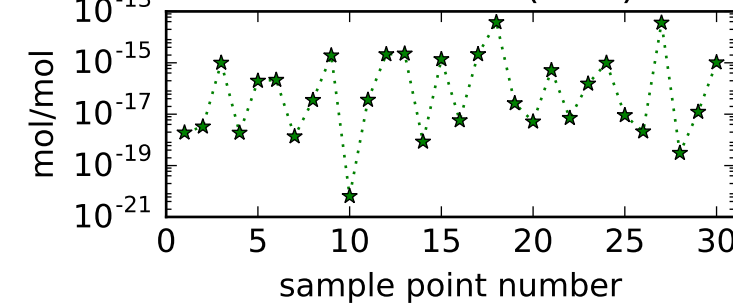

LNAPINABOOH (LIN)

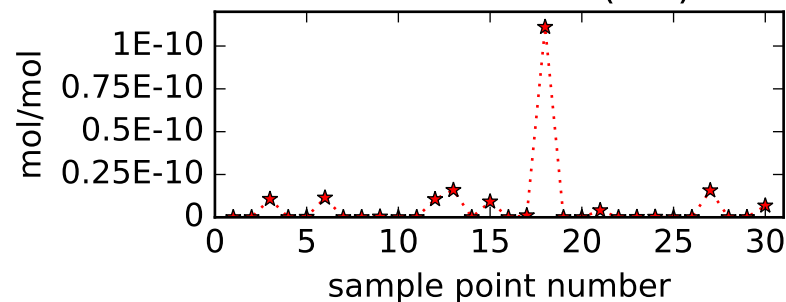

LNAPINABOOH (LOG)

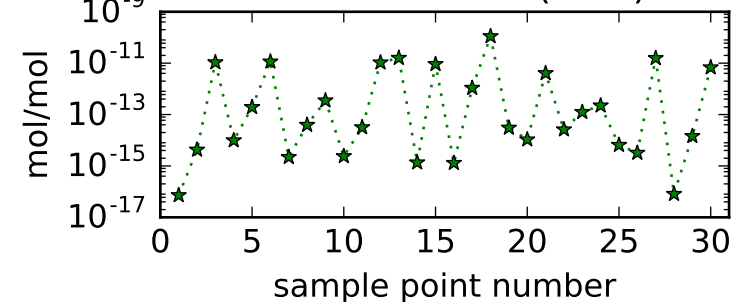

LNBPINABO2 (LIN)

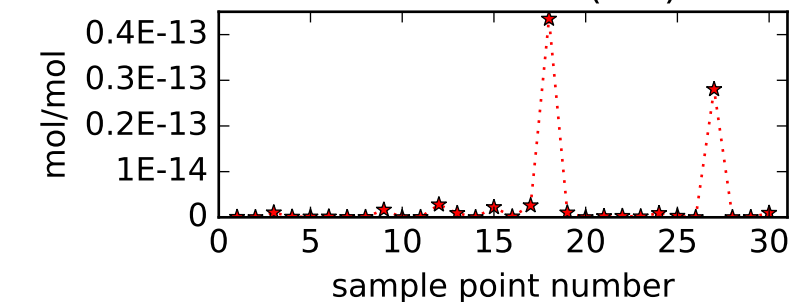

LNBPINABO2 (LOG)

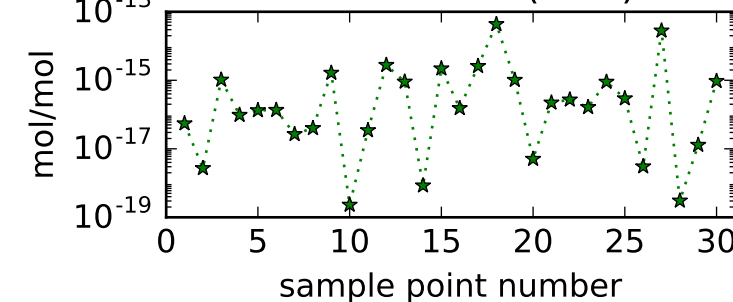

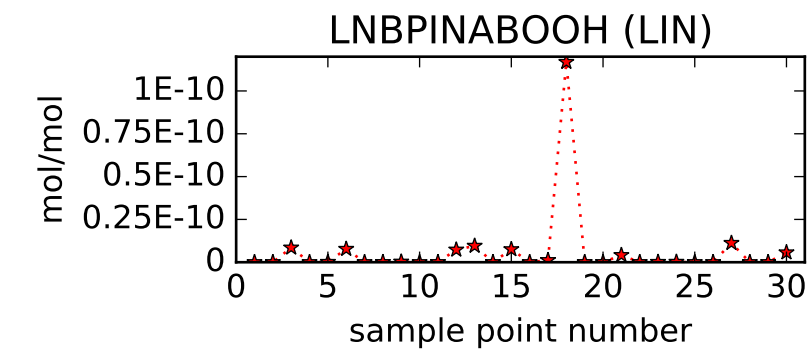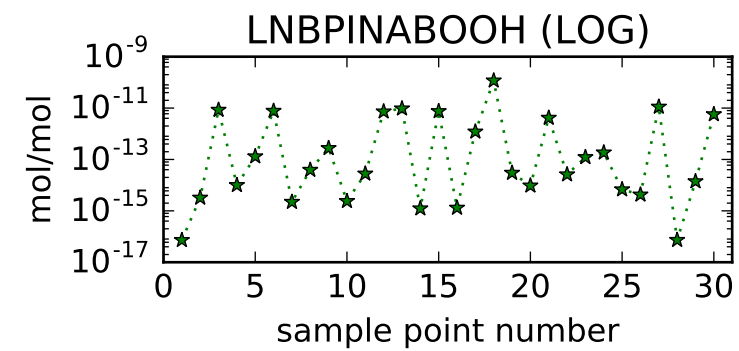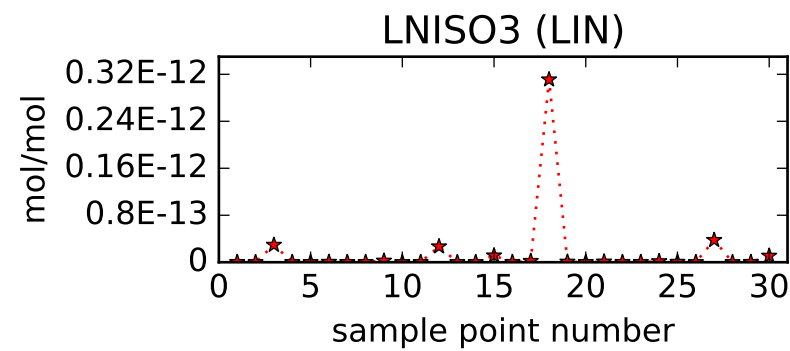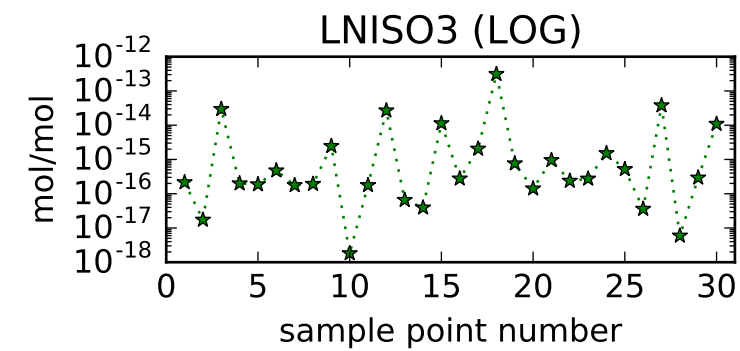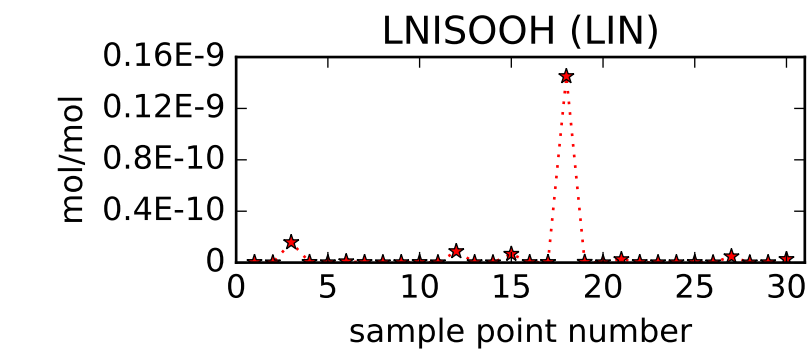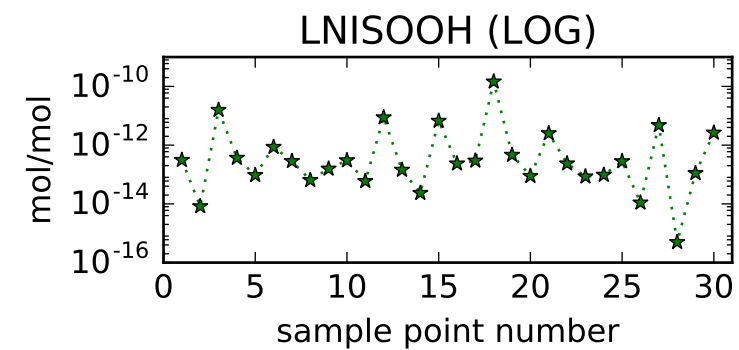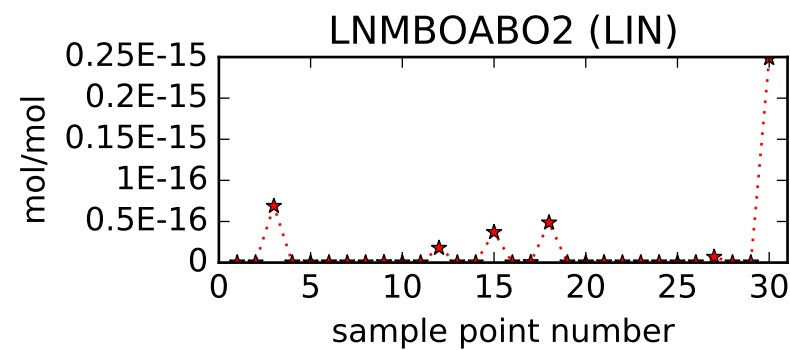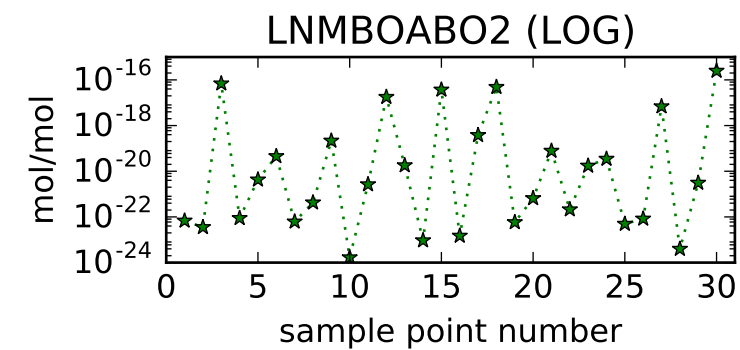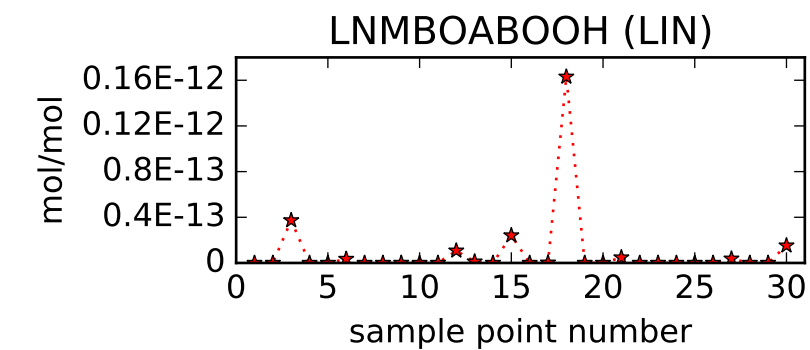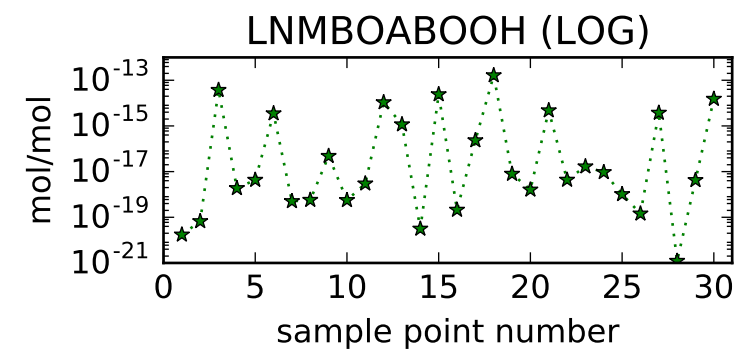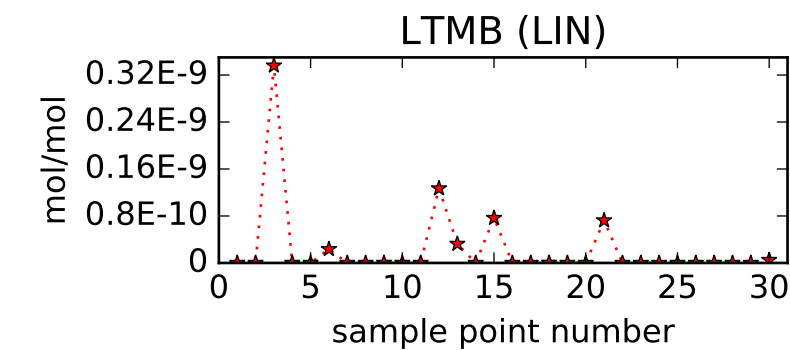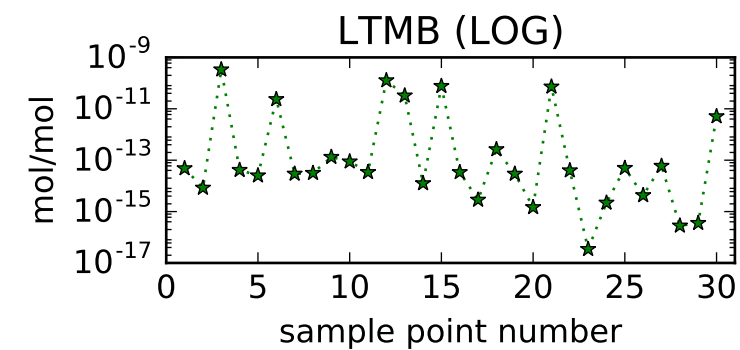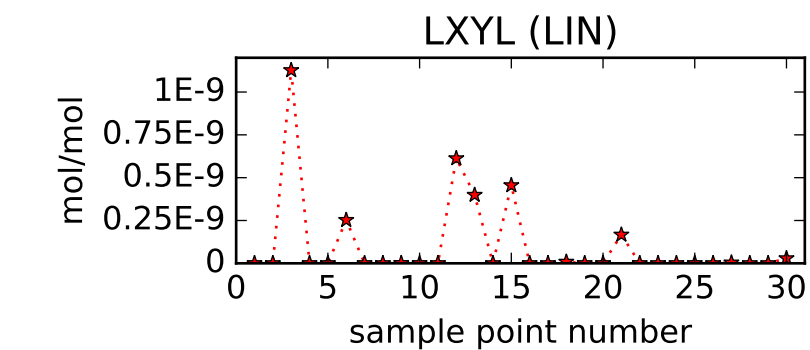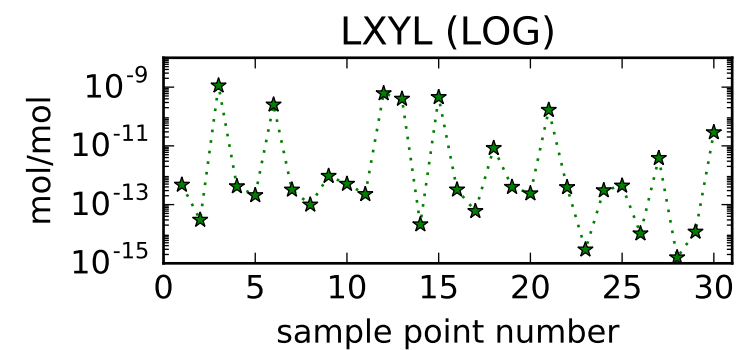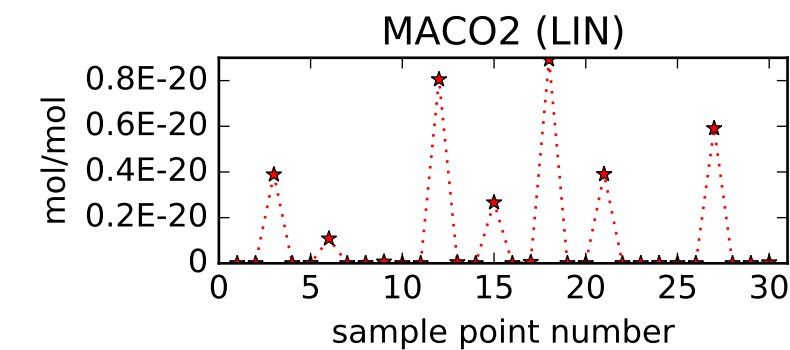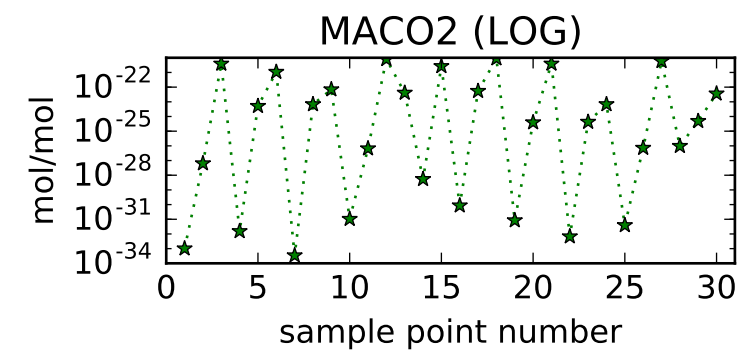



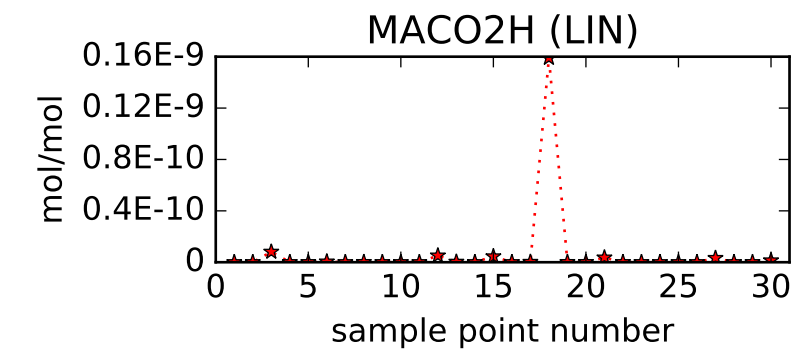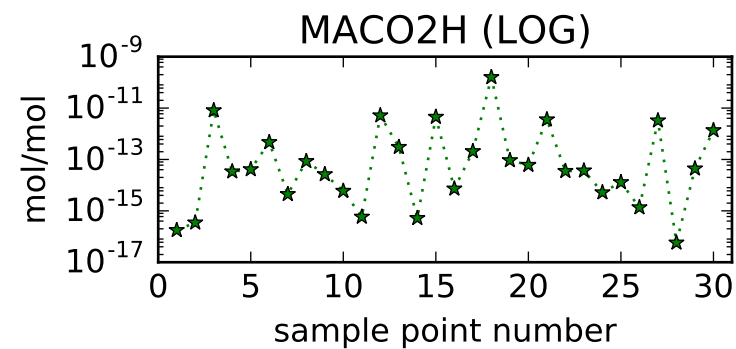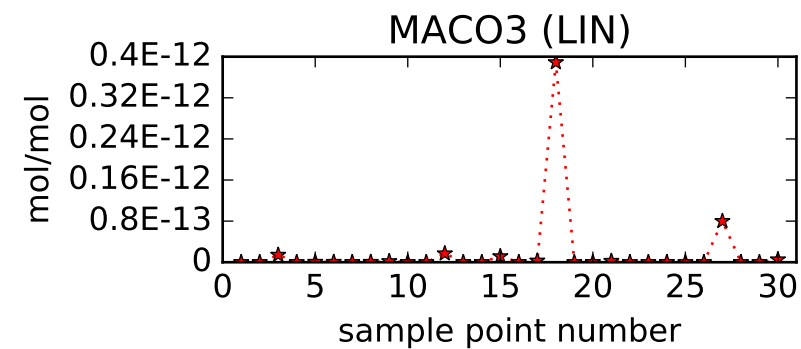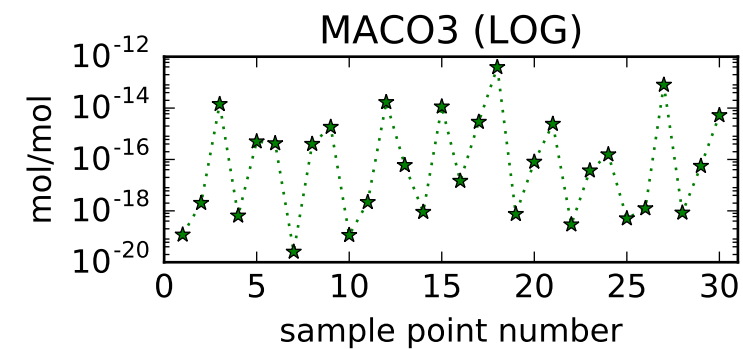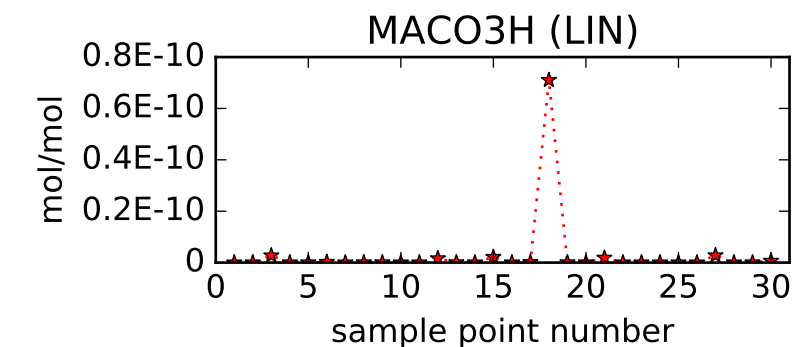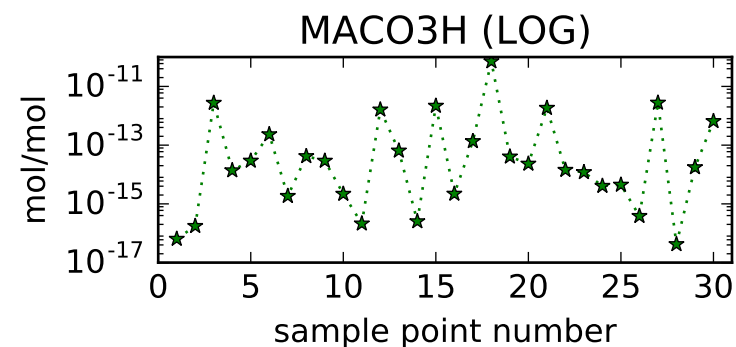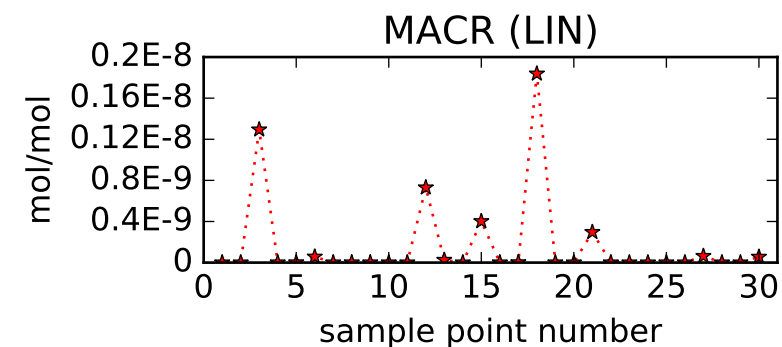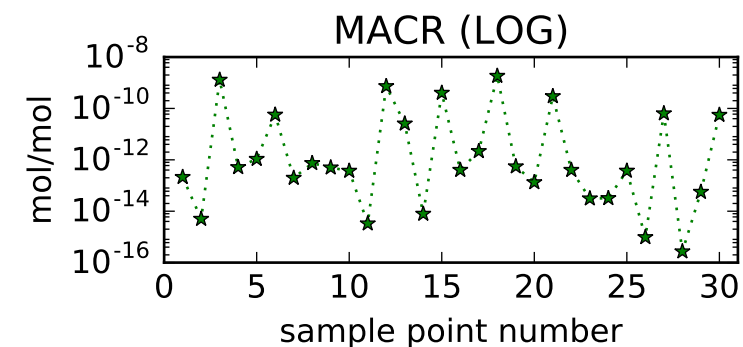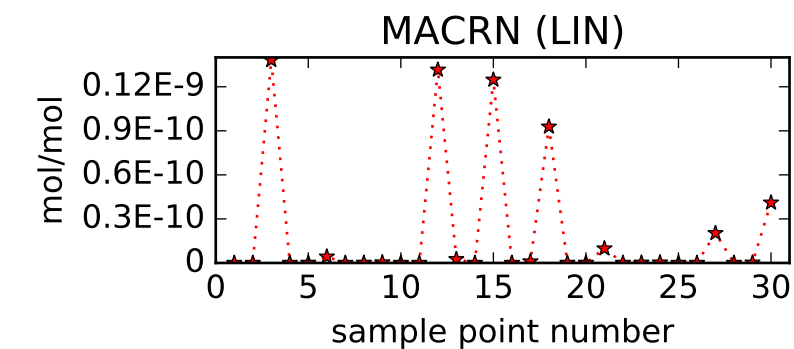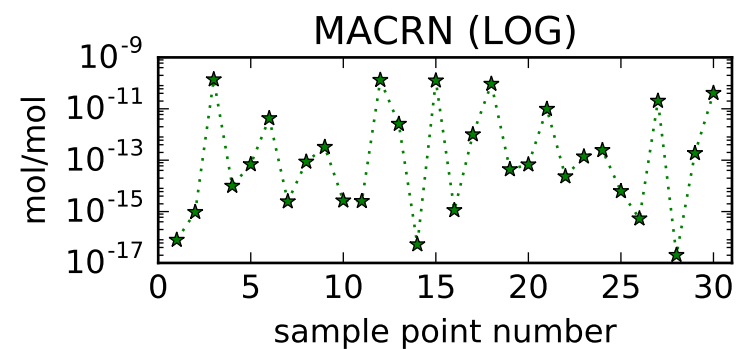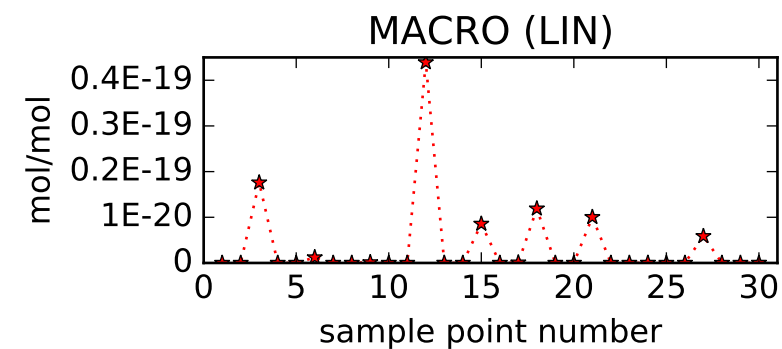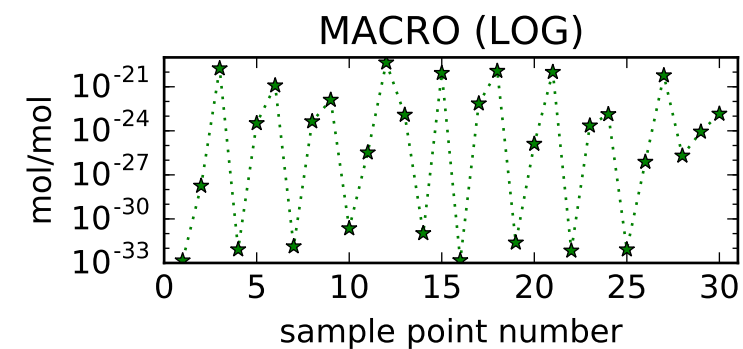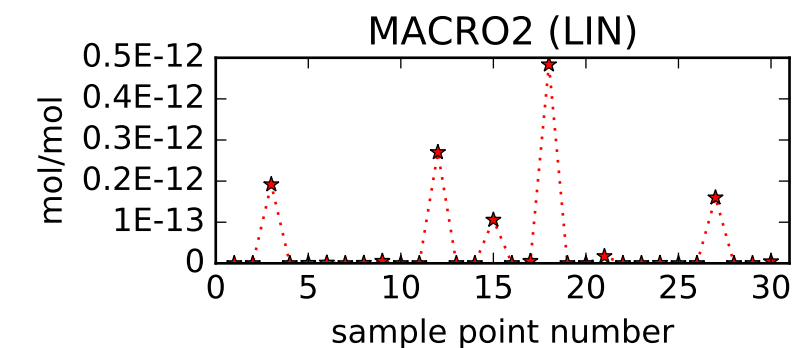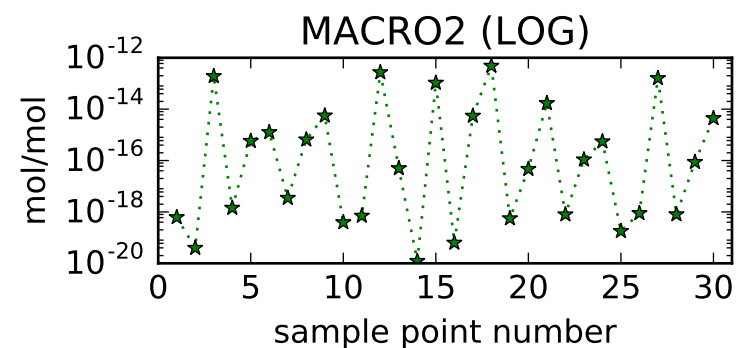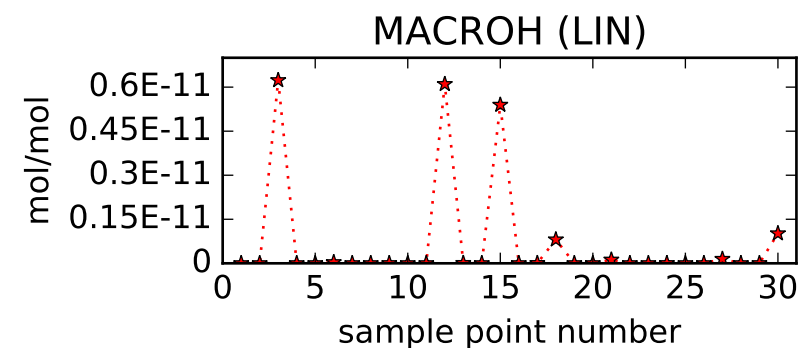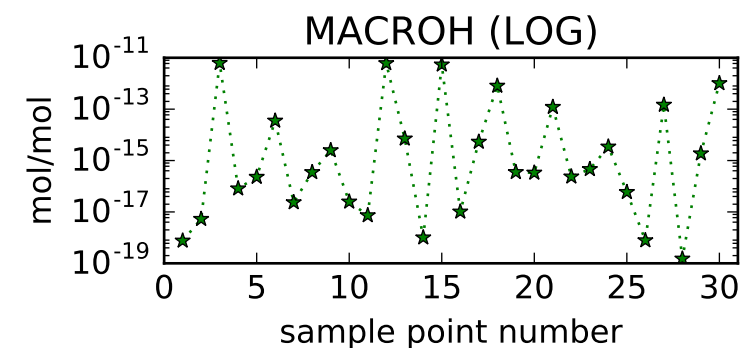

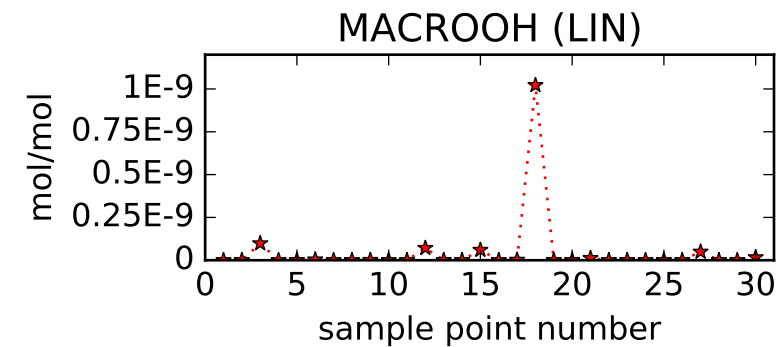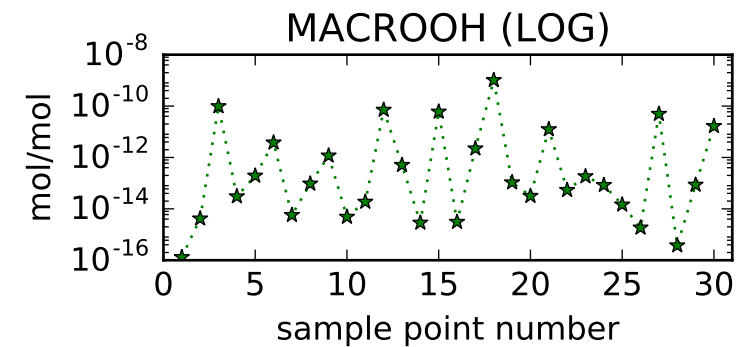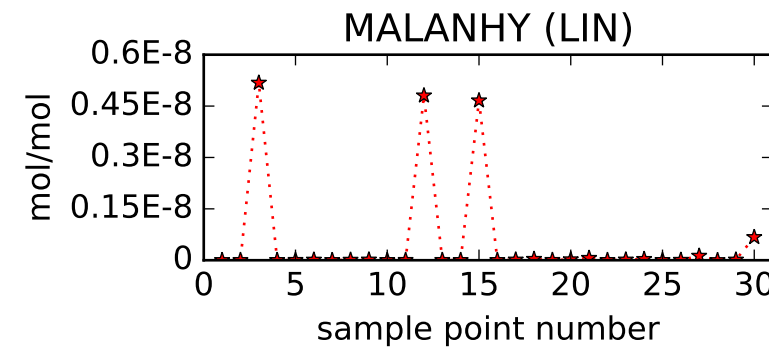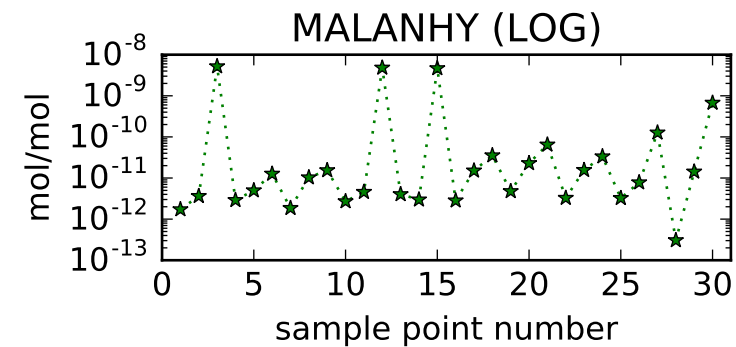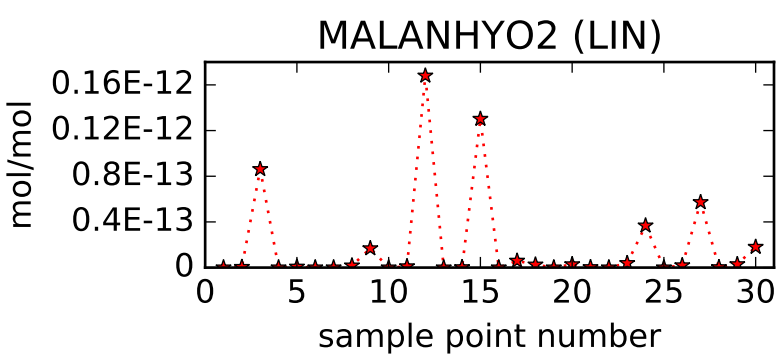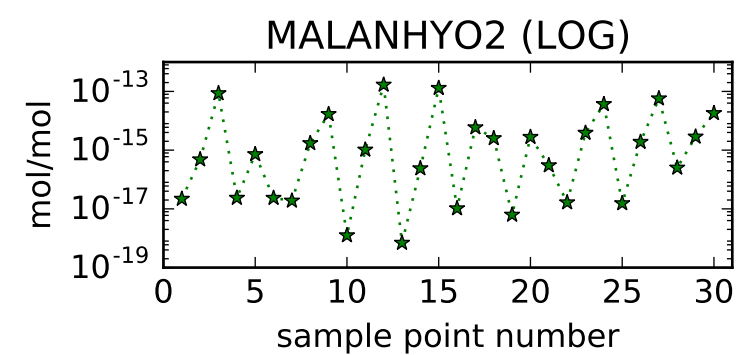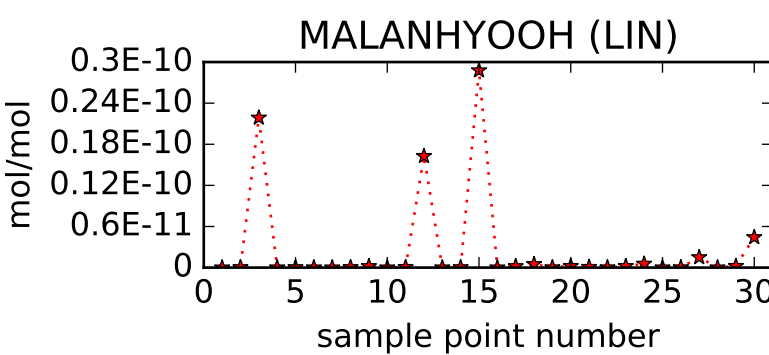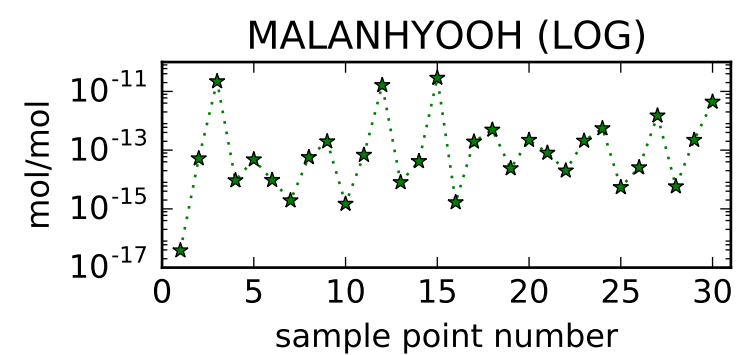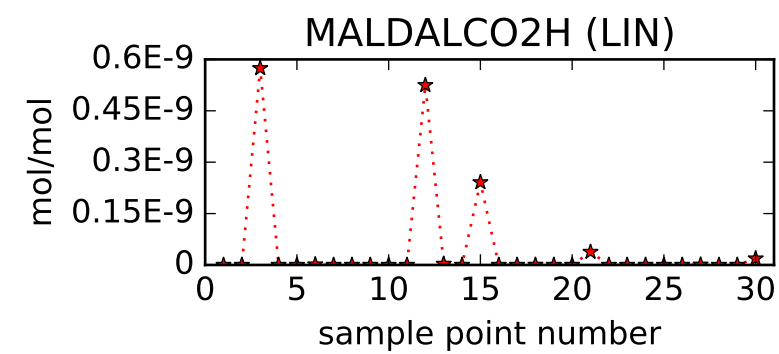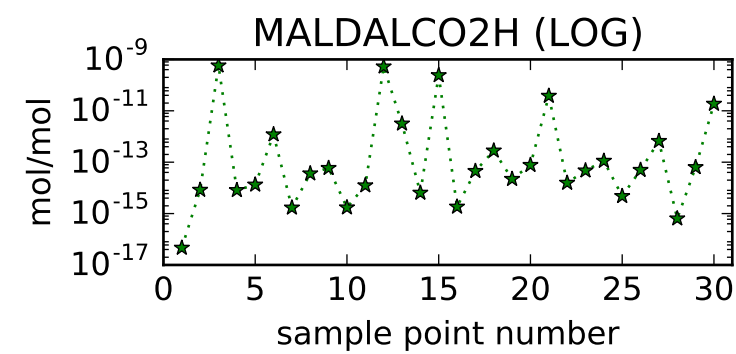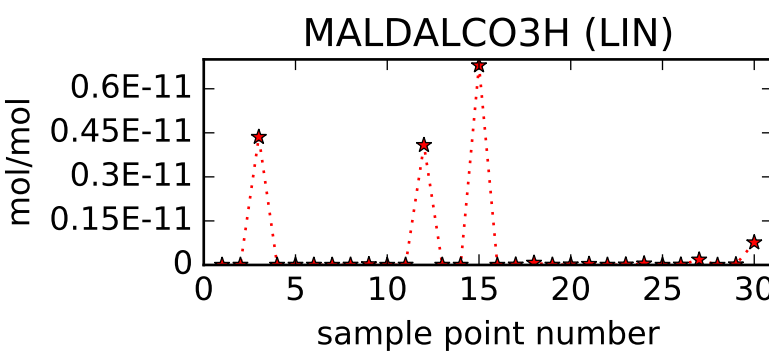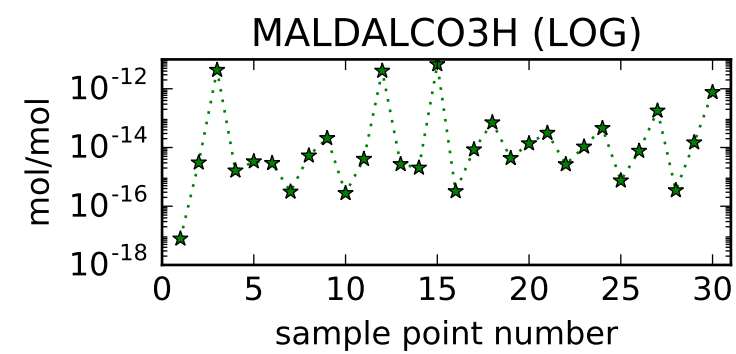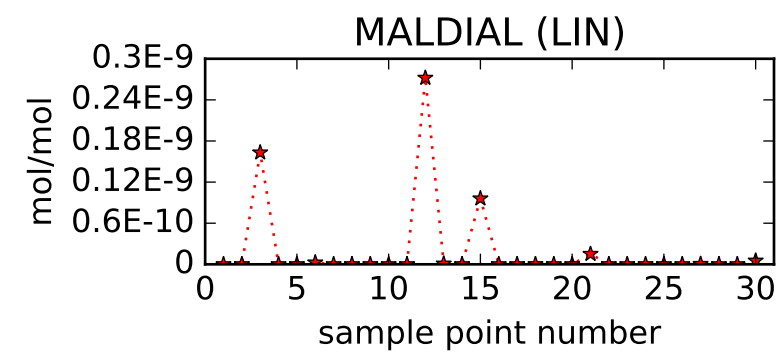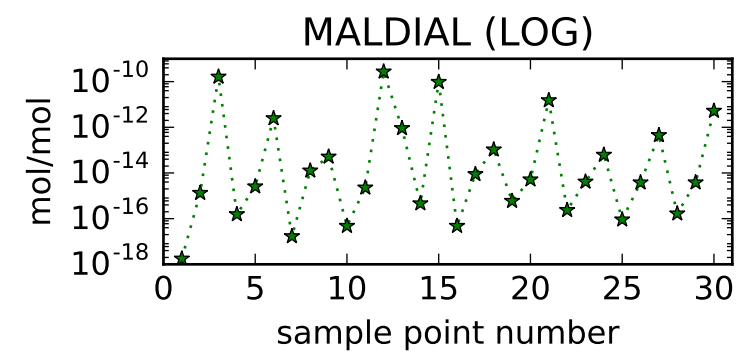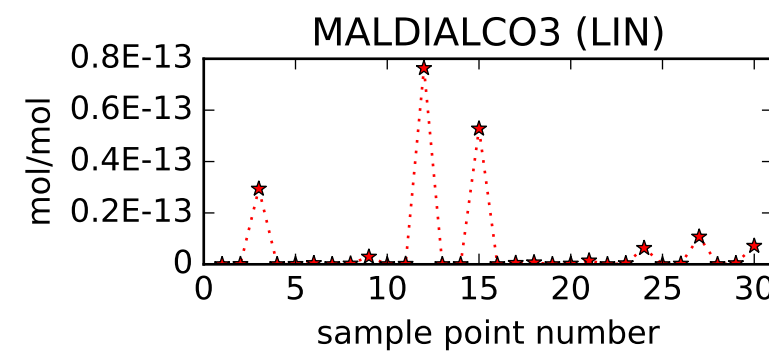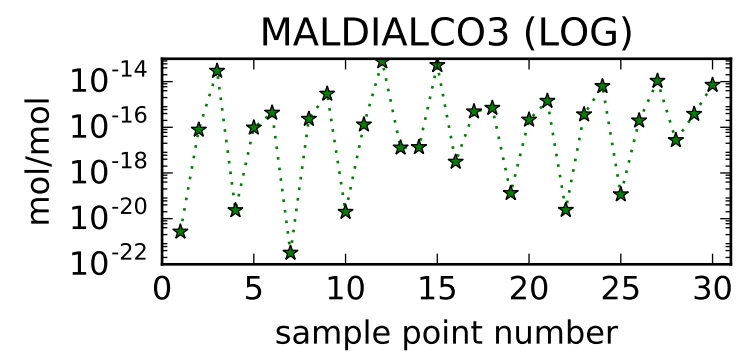

MALDIALO2 (LIN)

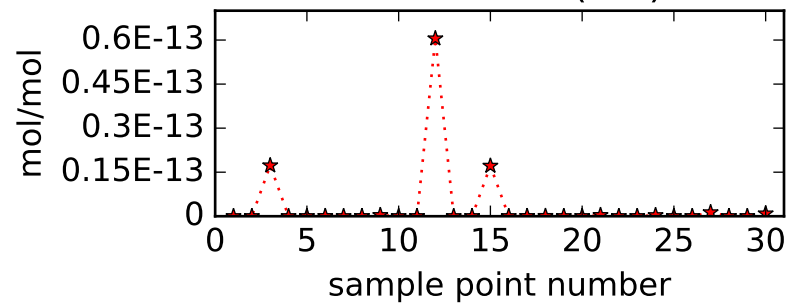

MALDIALO2 (LOG)

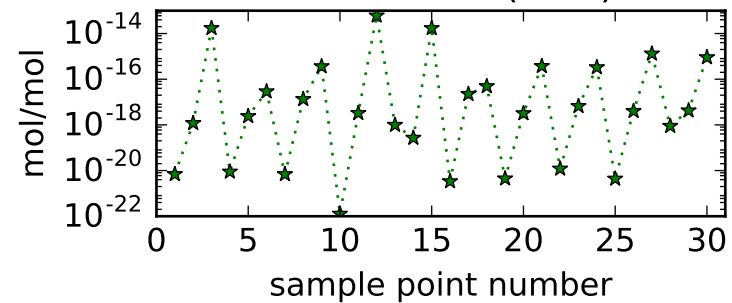

MALDIALOOH (LIN)

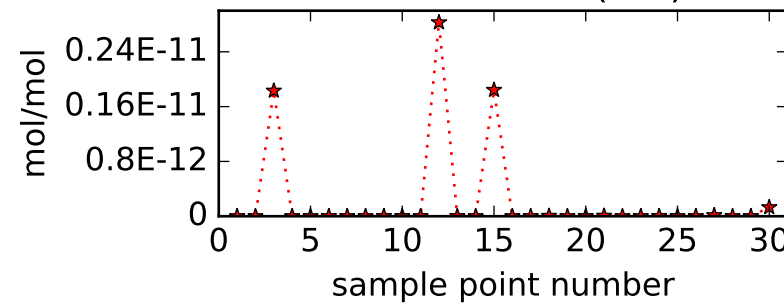

MALDIALOOH (LOG)

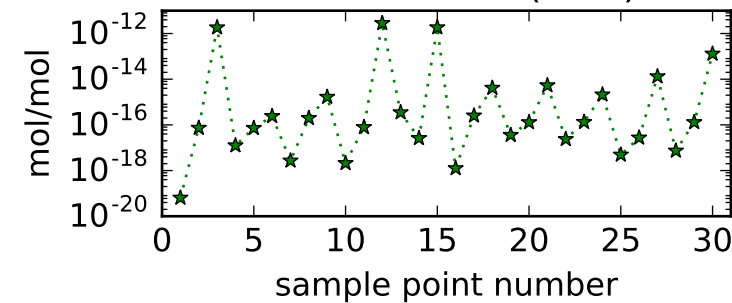

MALDIALPAN (LIN)

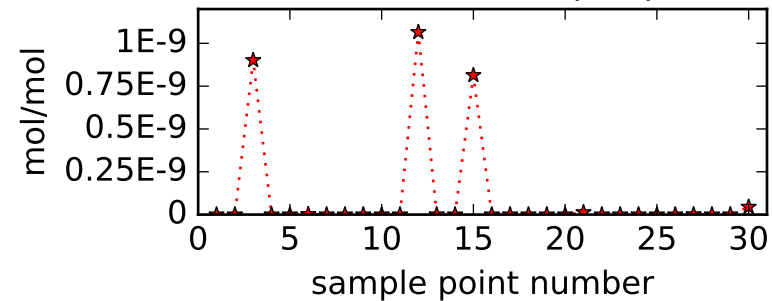

MALDIALPAN (LOG)

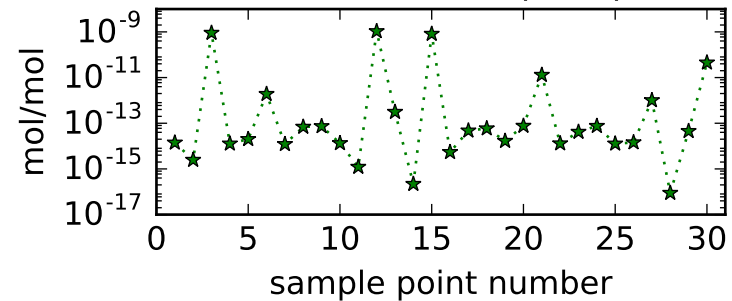

MALNHYOHCO (LIN)

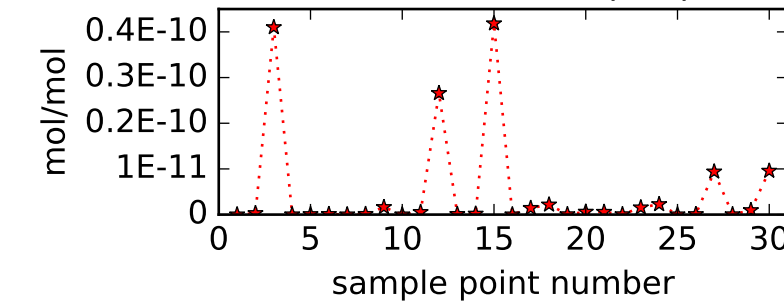

MALNHYOHCO (LOG)

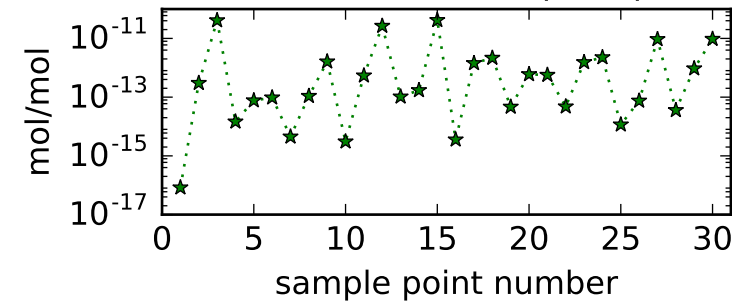

MBO (LIN)

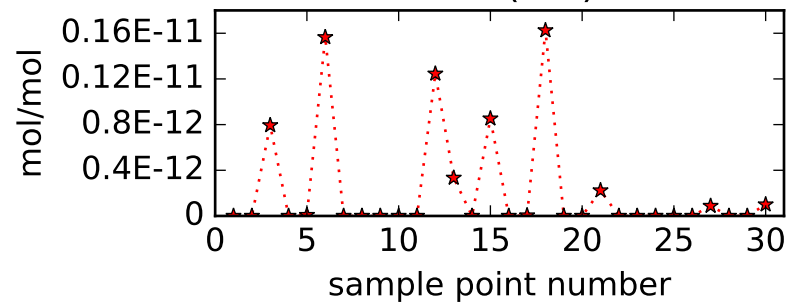

MBO (LOG)

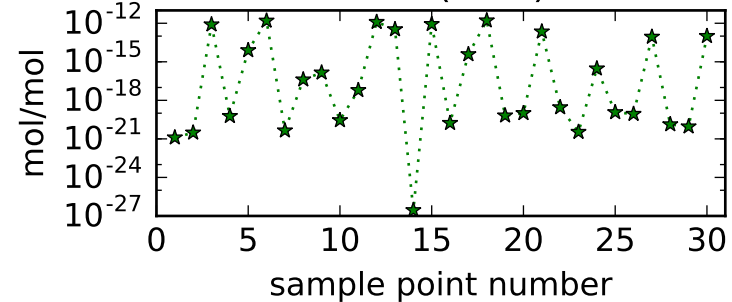

MBOACO (LIN)

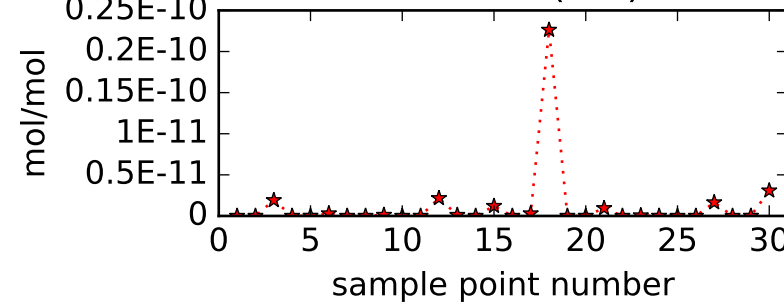

MBOACO (LOG)

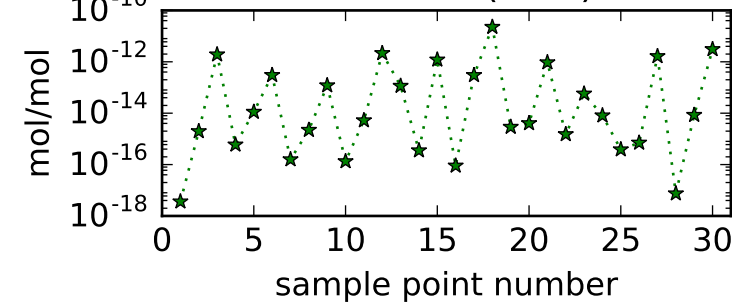

MBOCOCO (LIN)

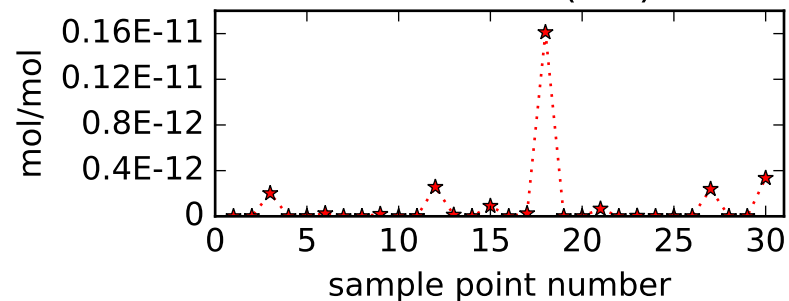

MBOCOCO (LOG)

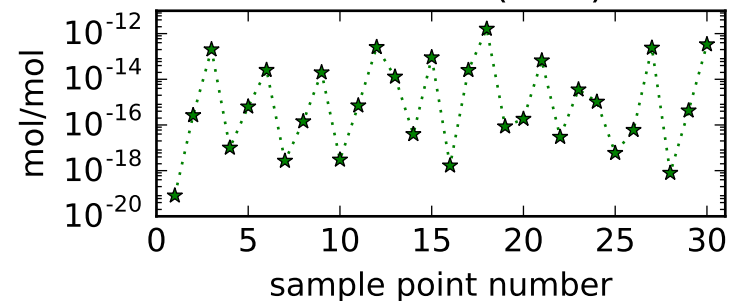

MBOOO (LIN)

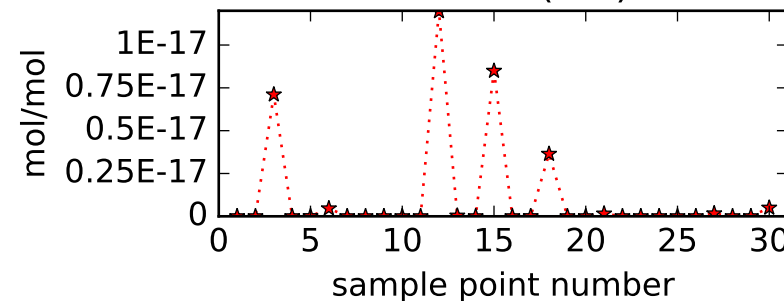

MBOOO (LOG)

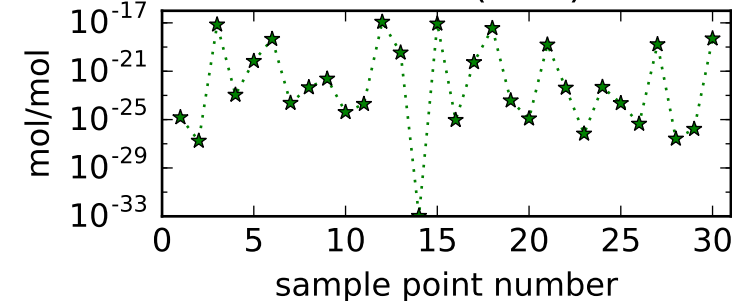

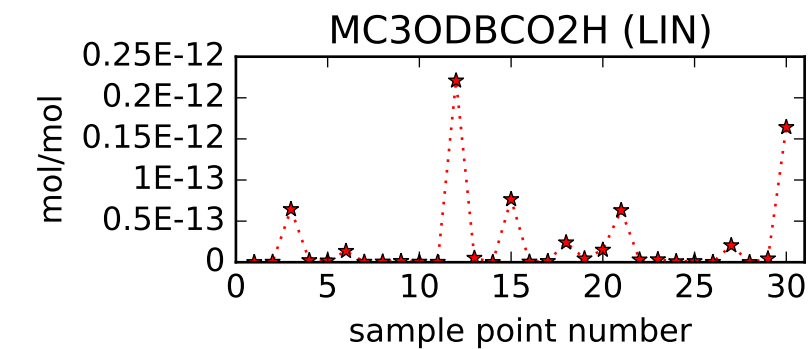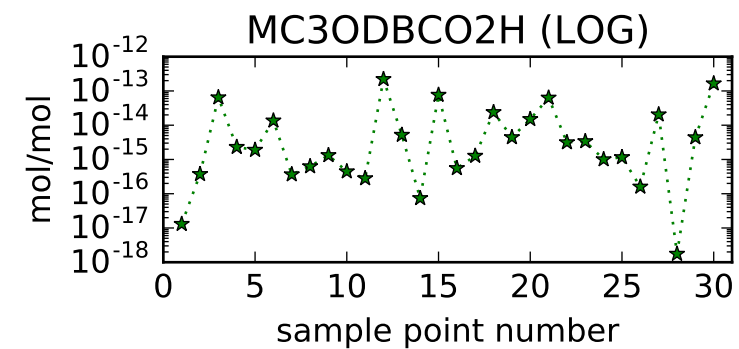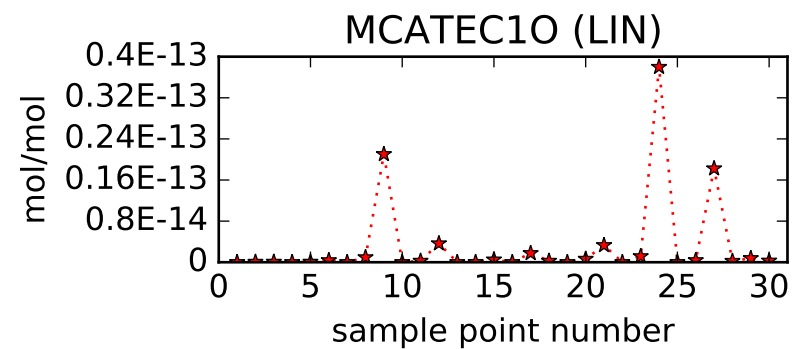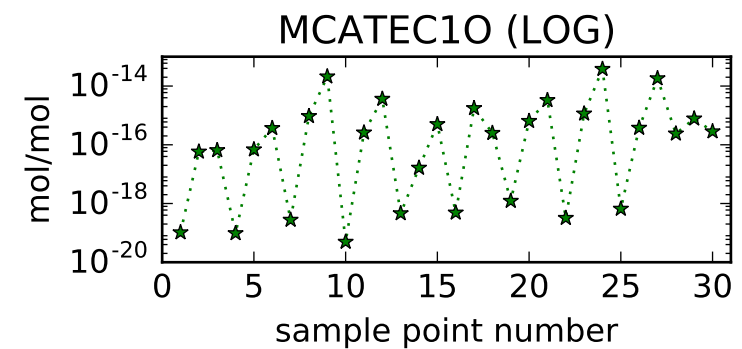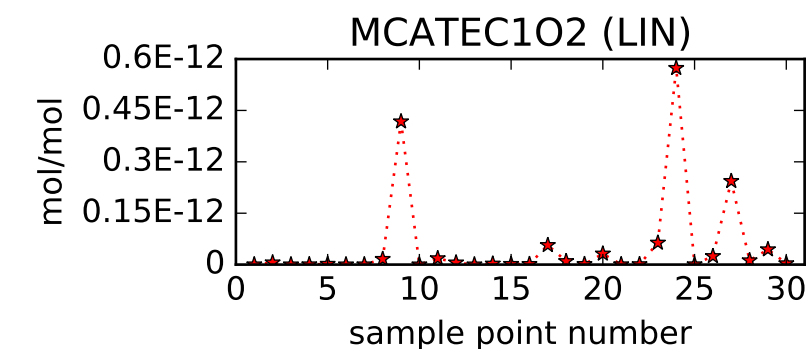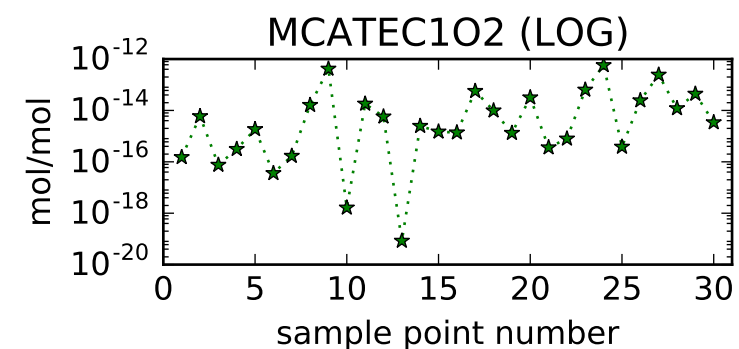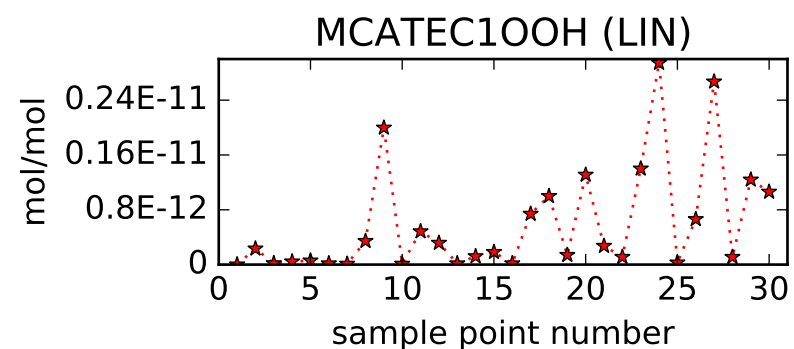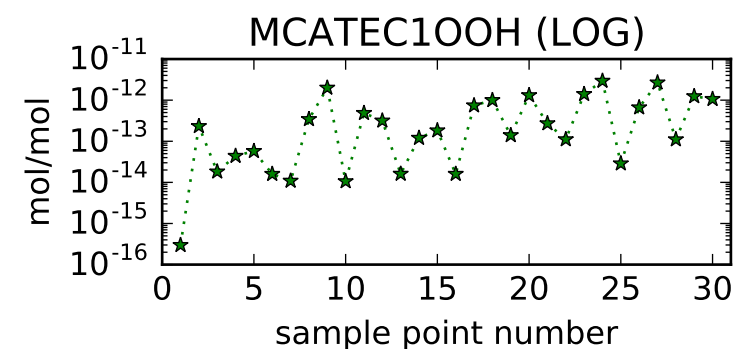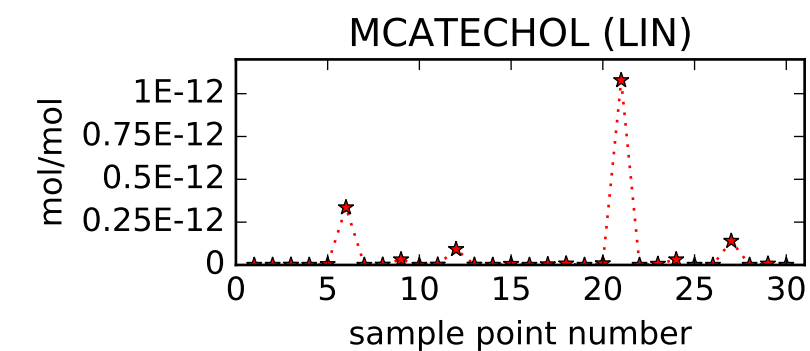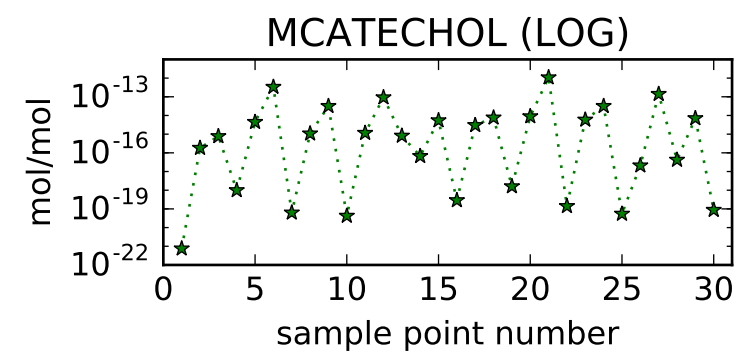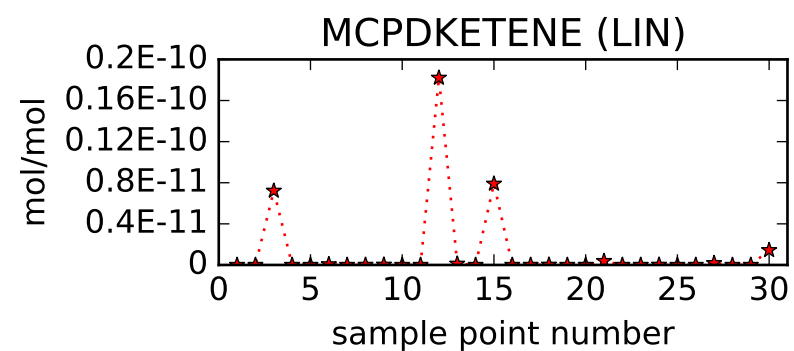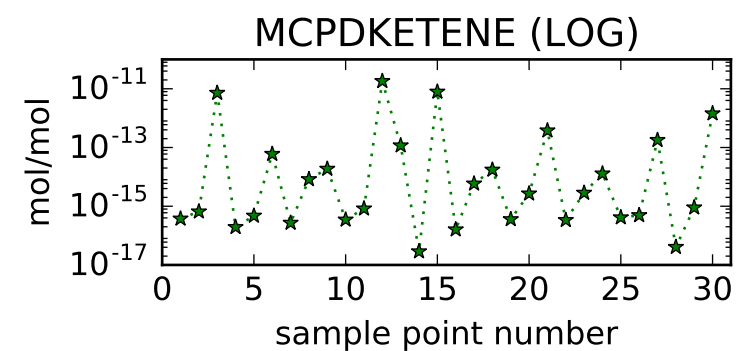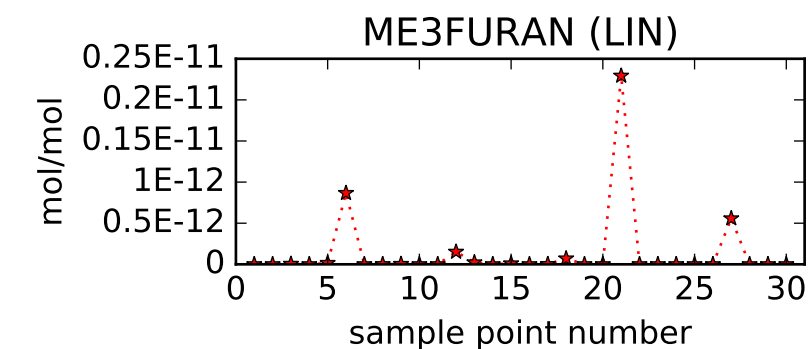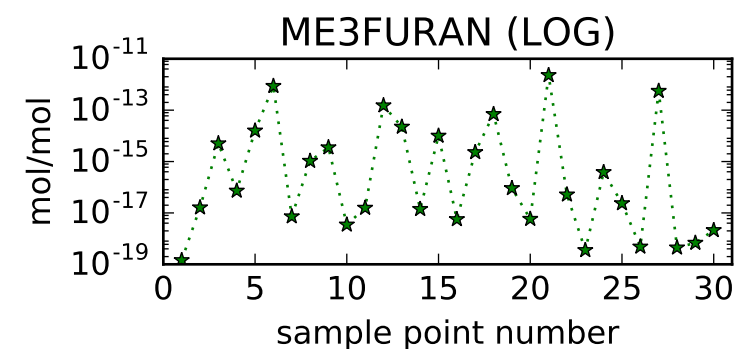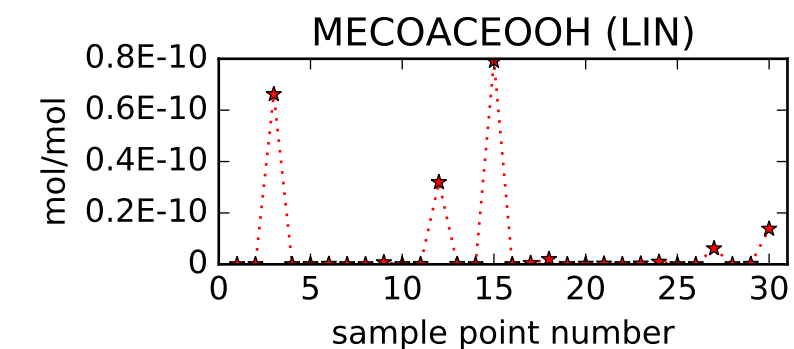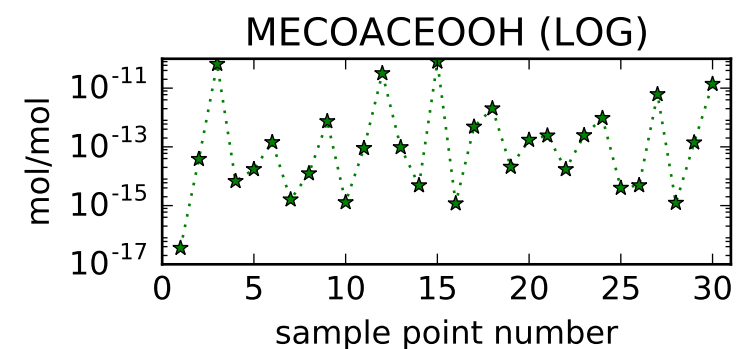

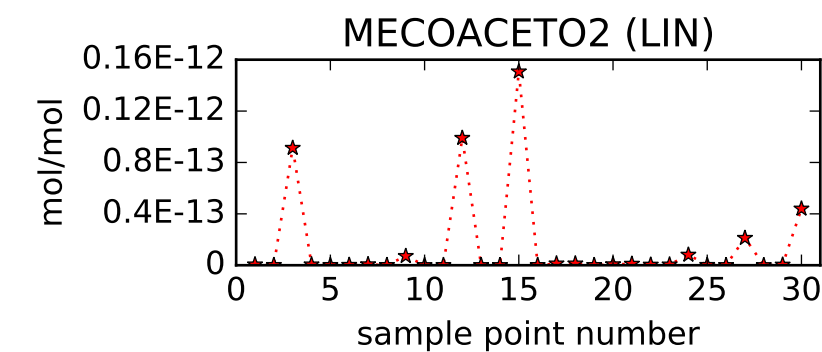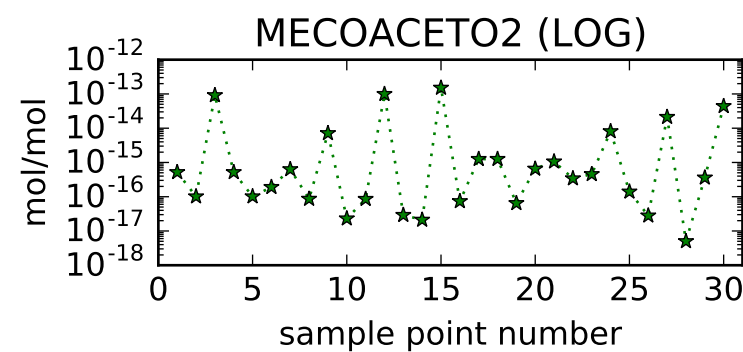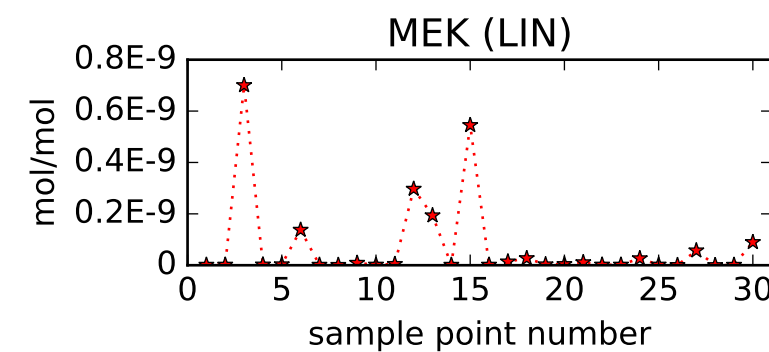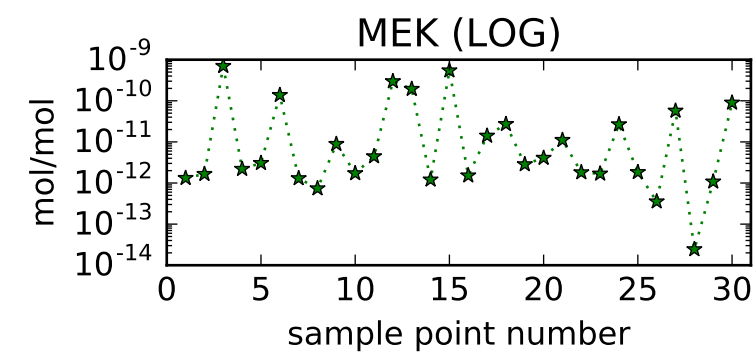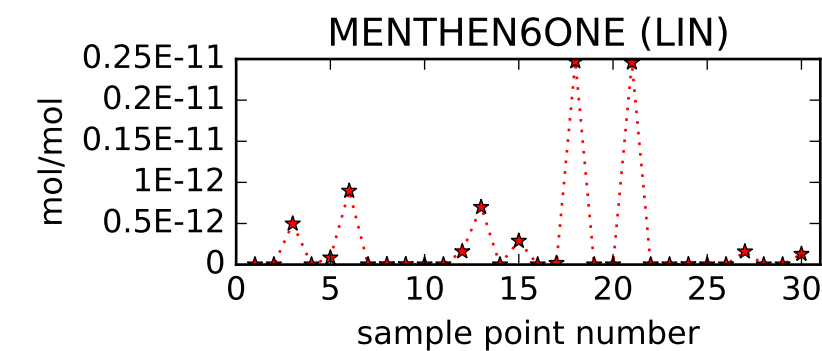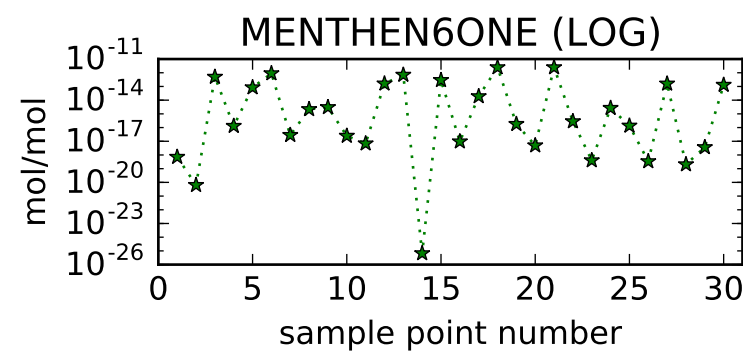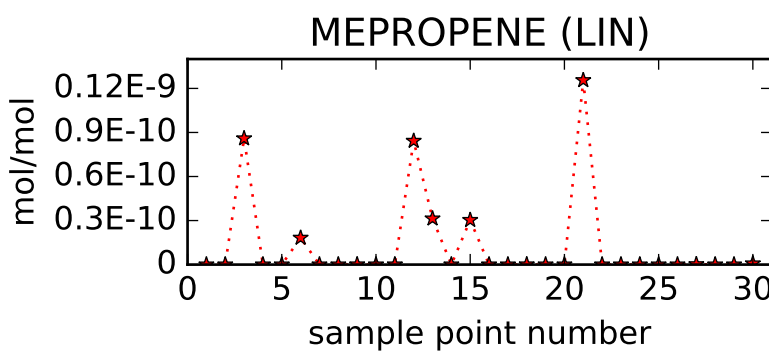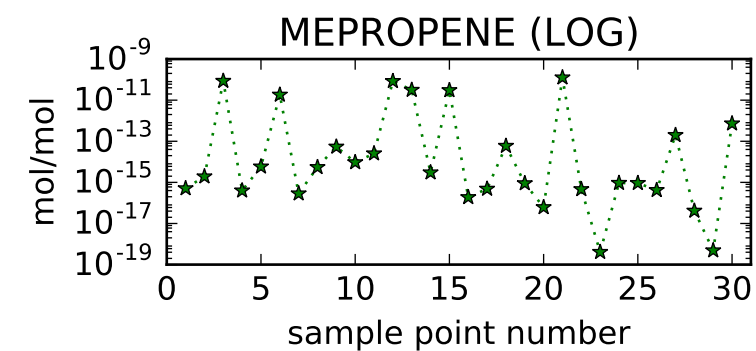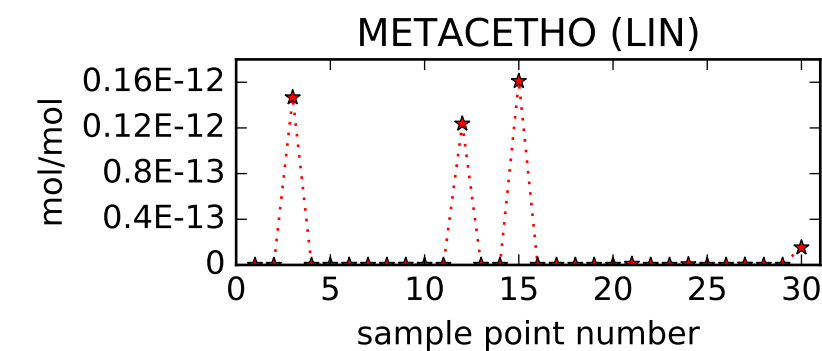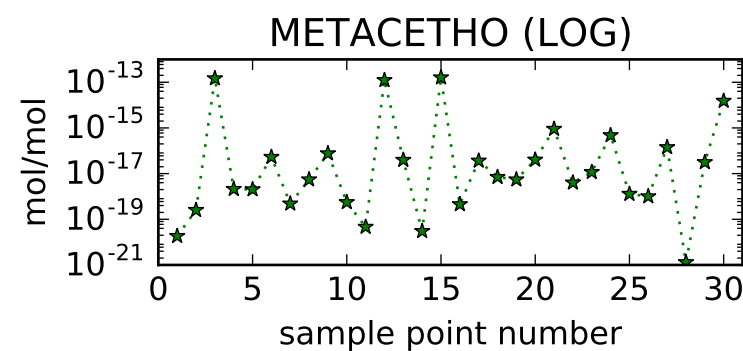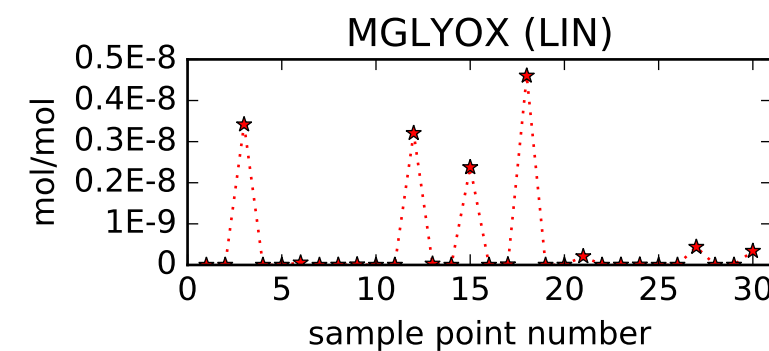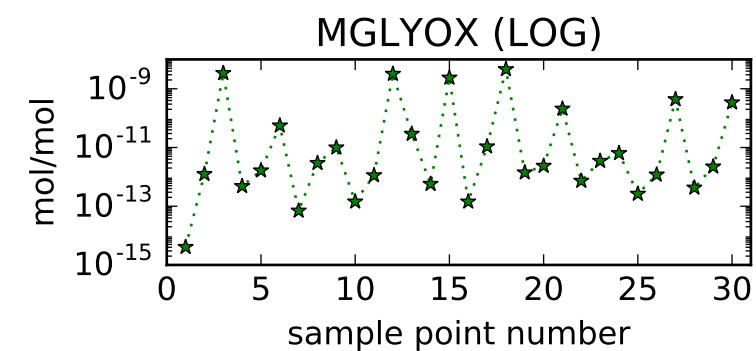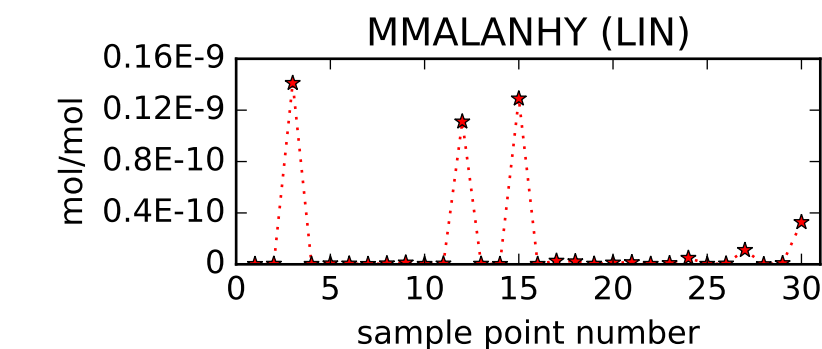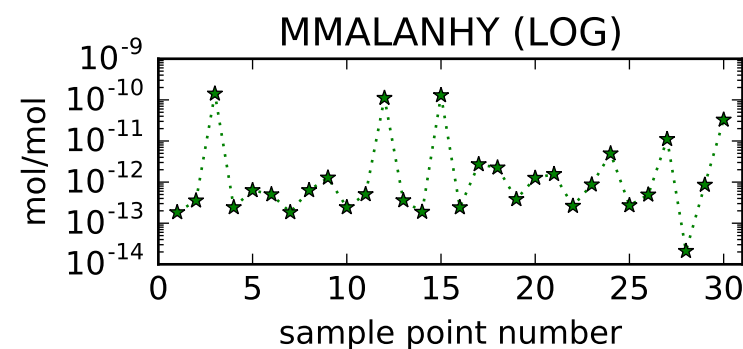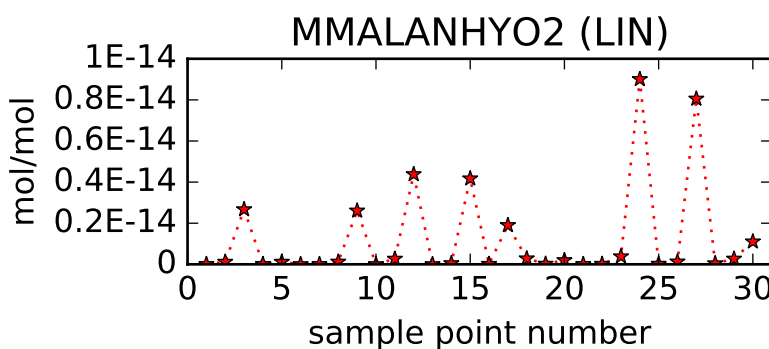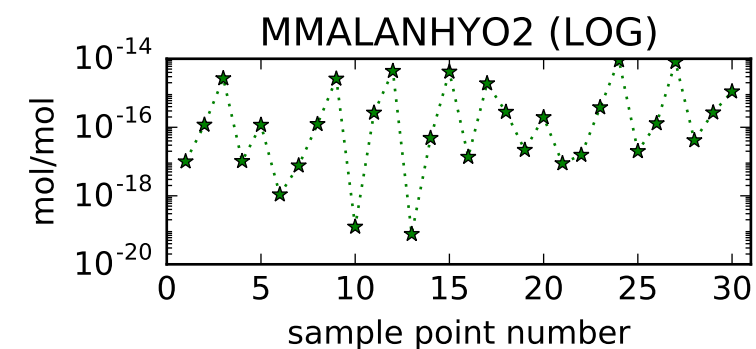



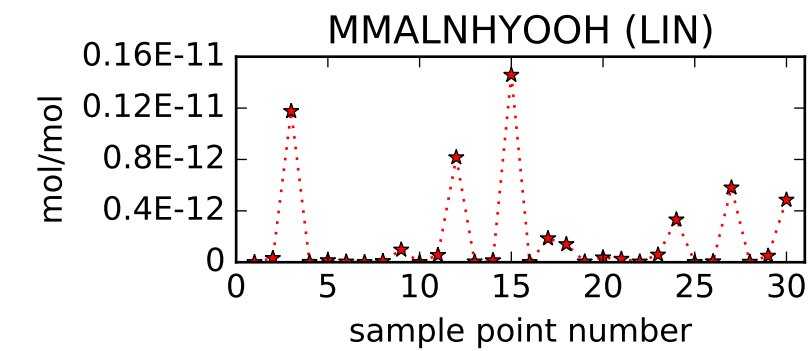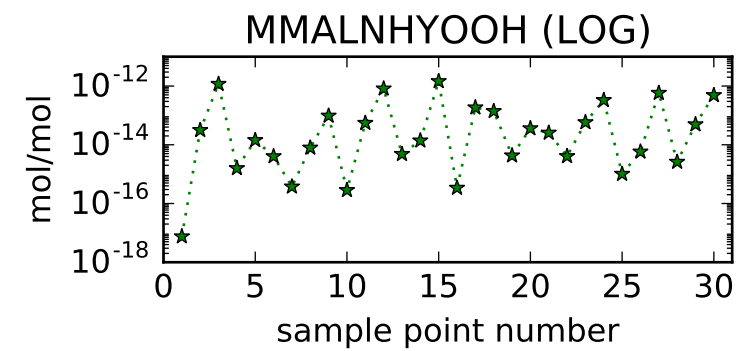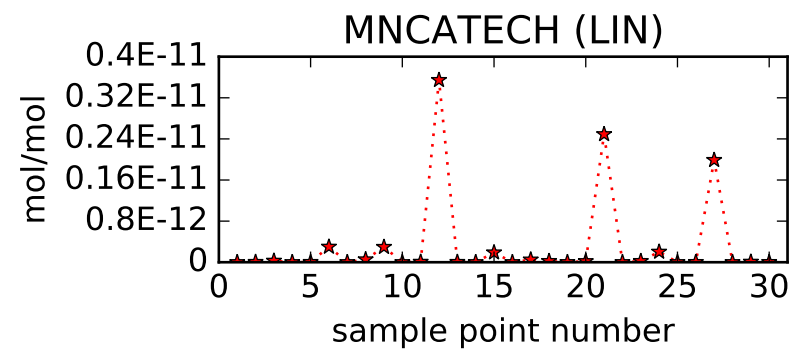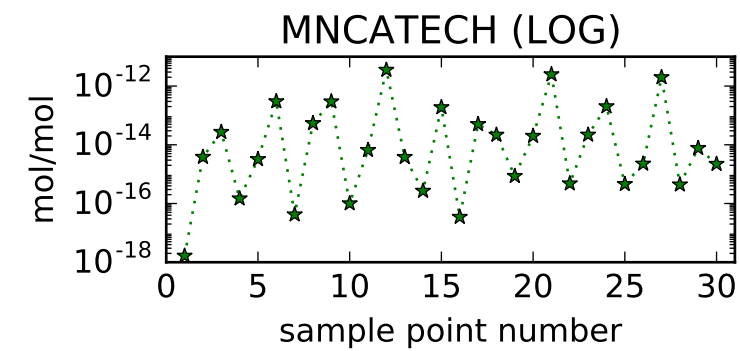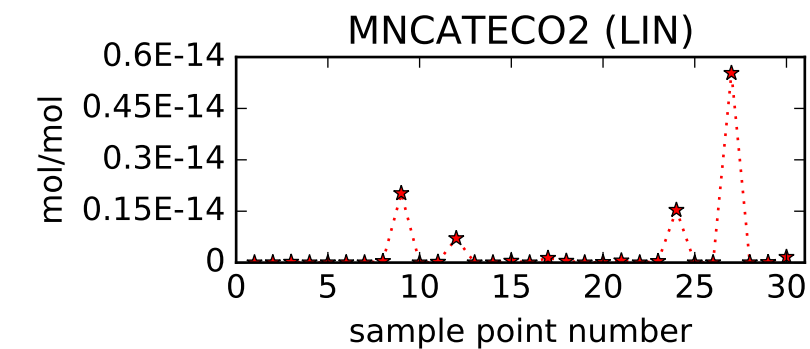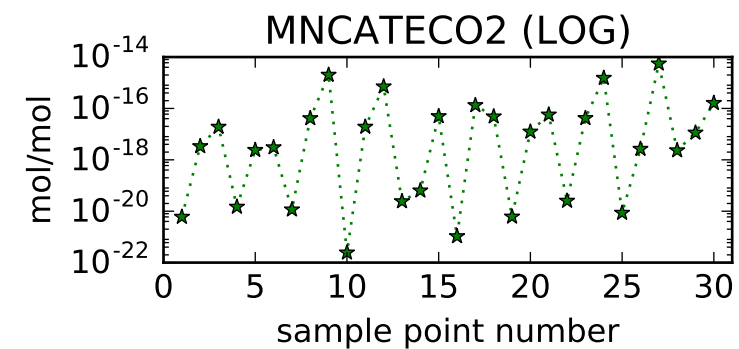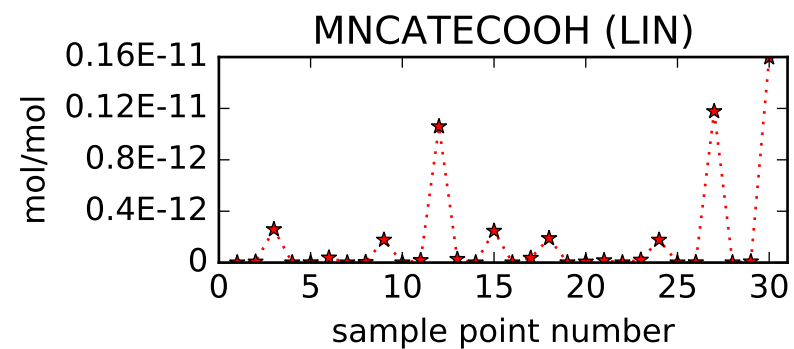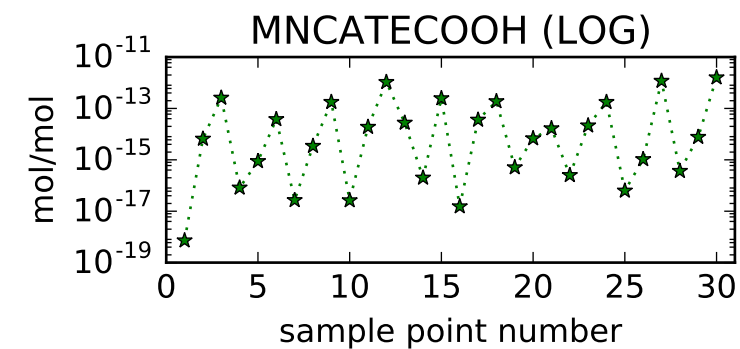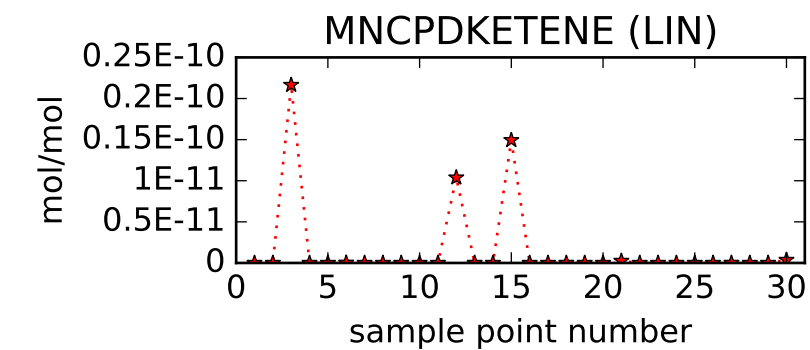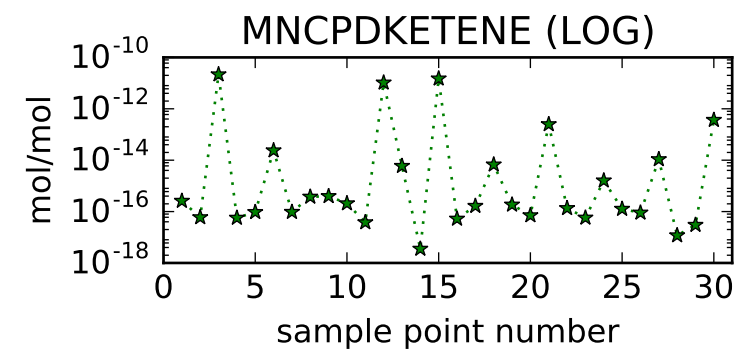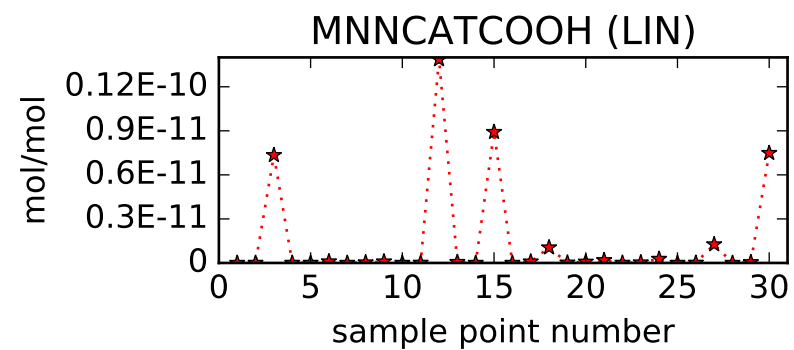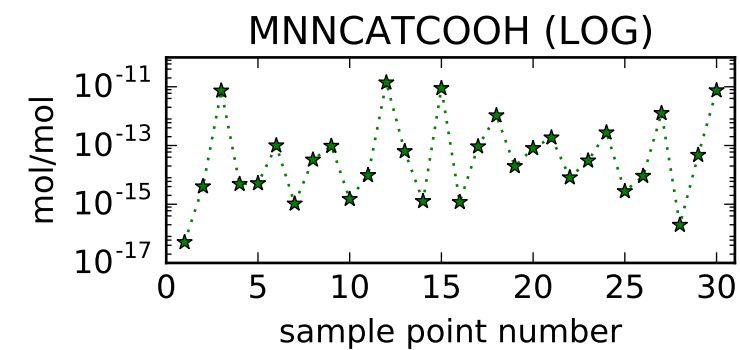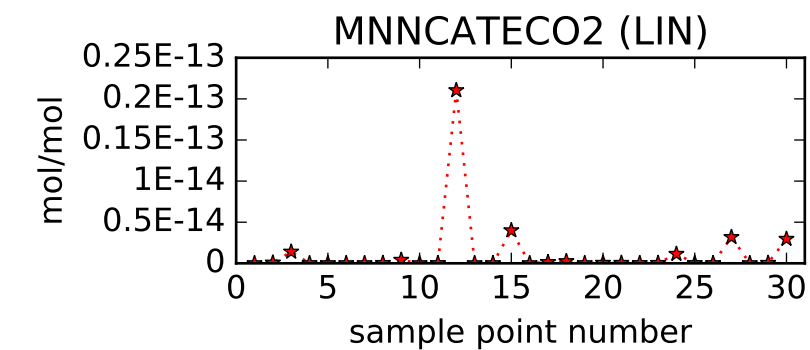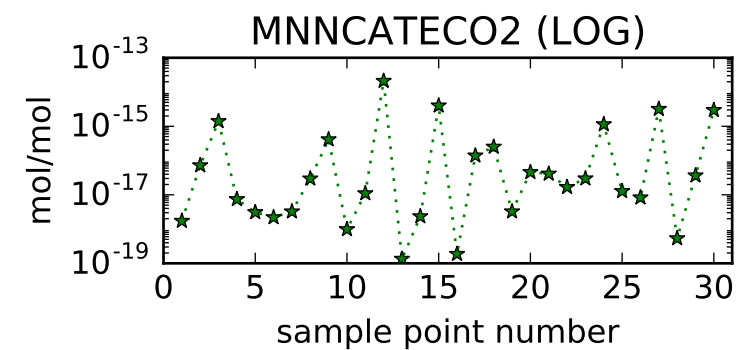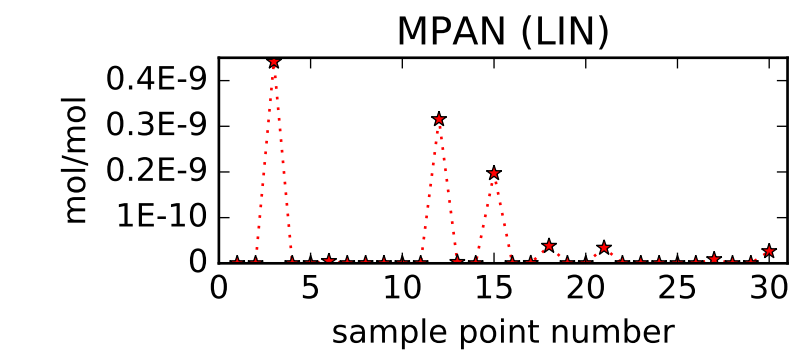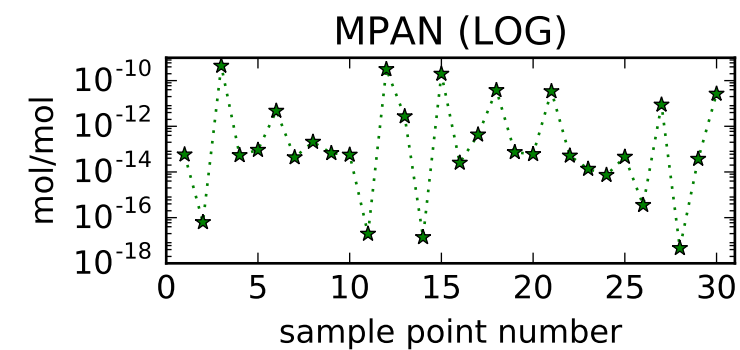

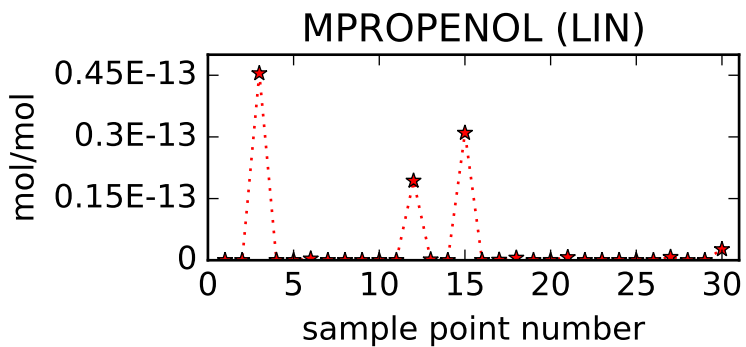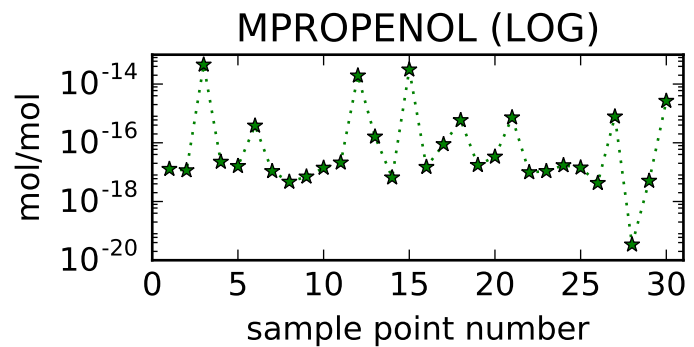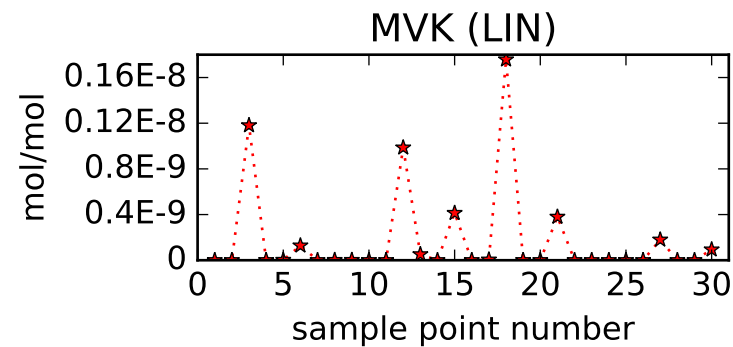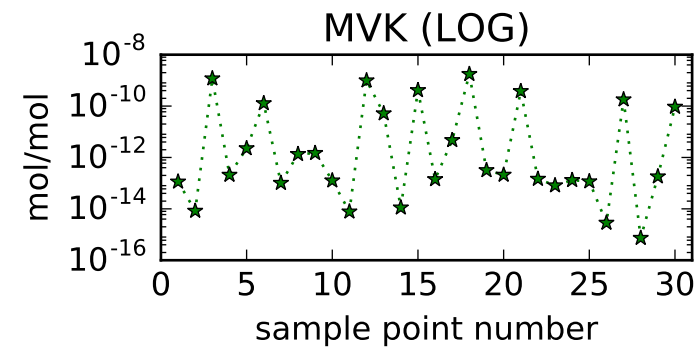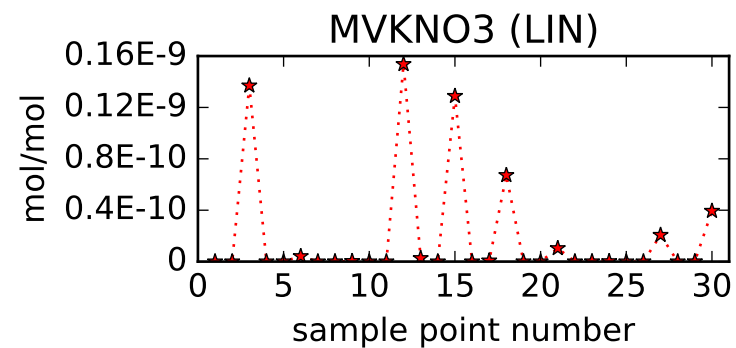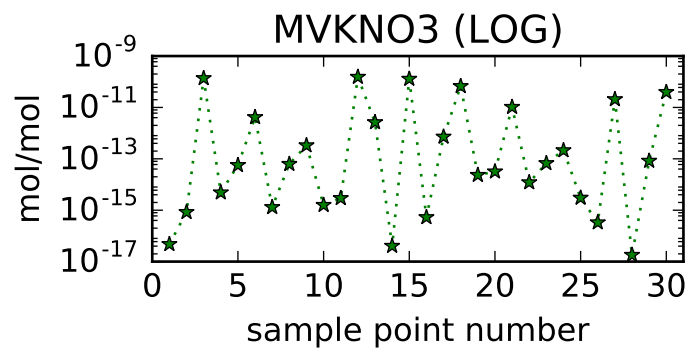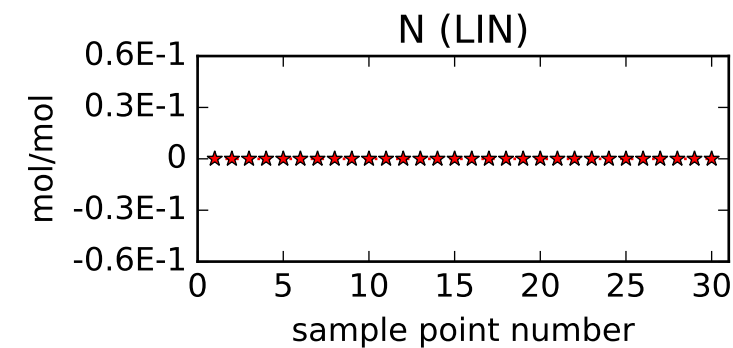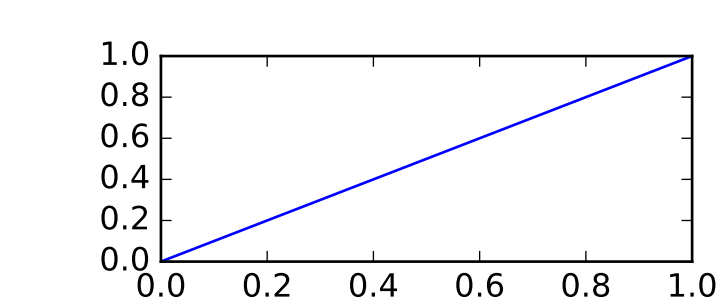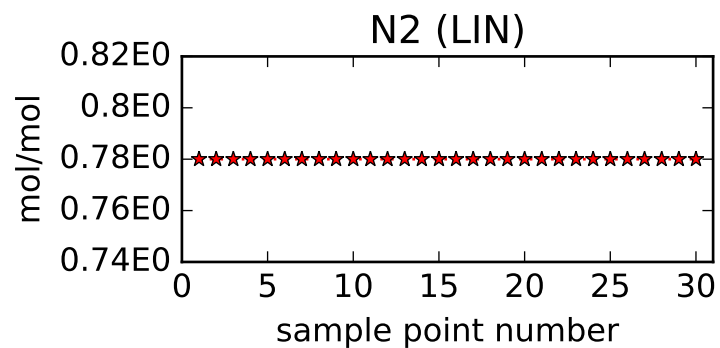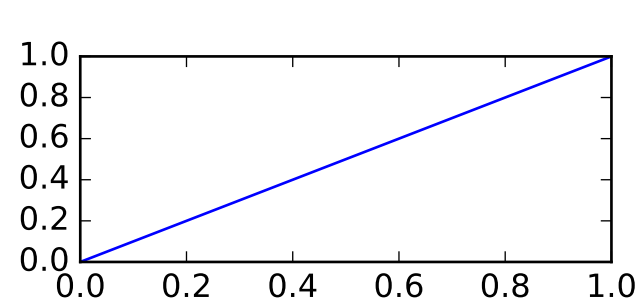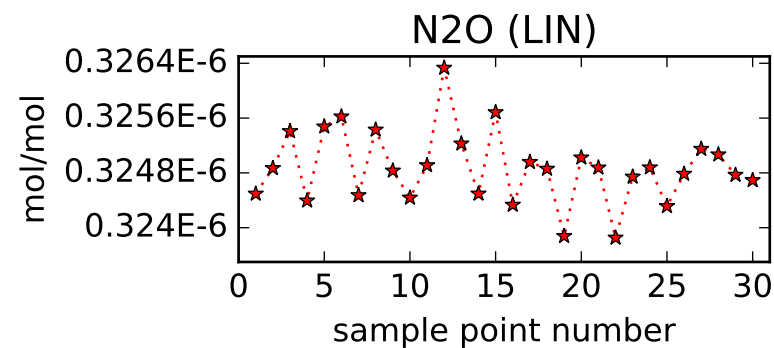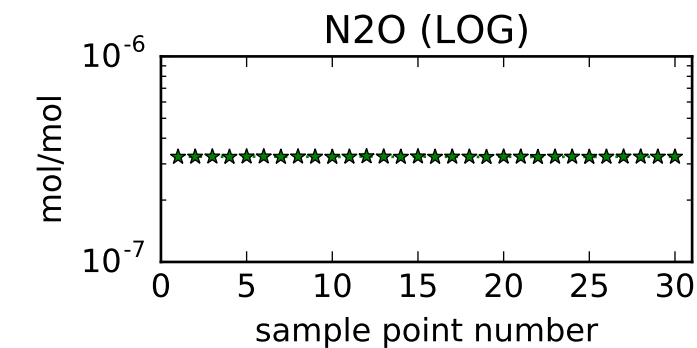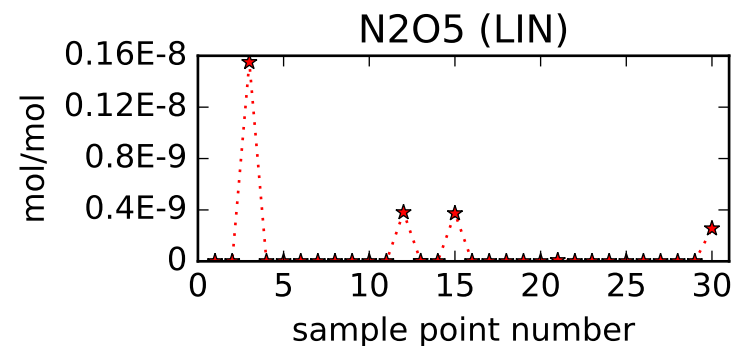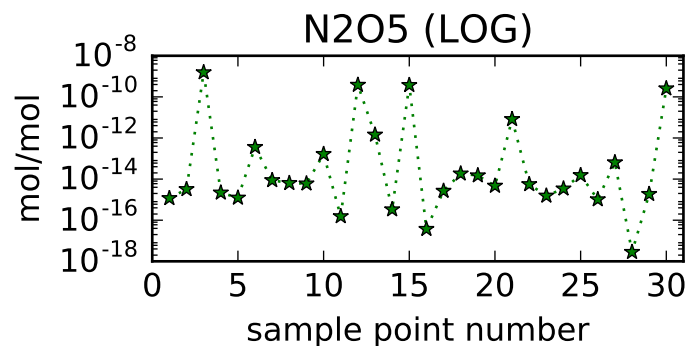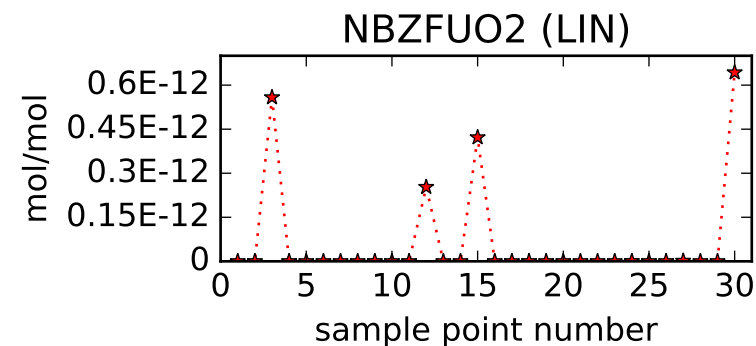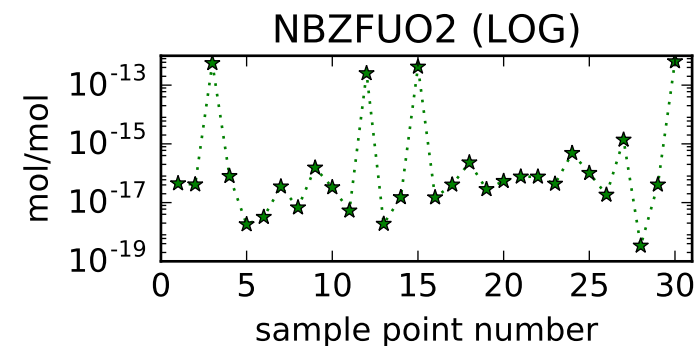

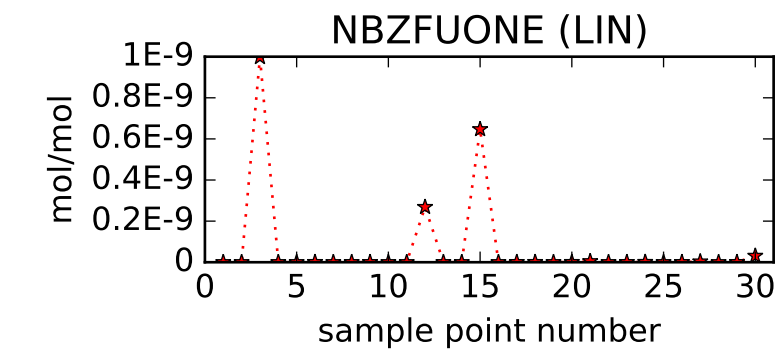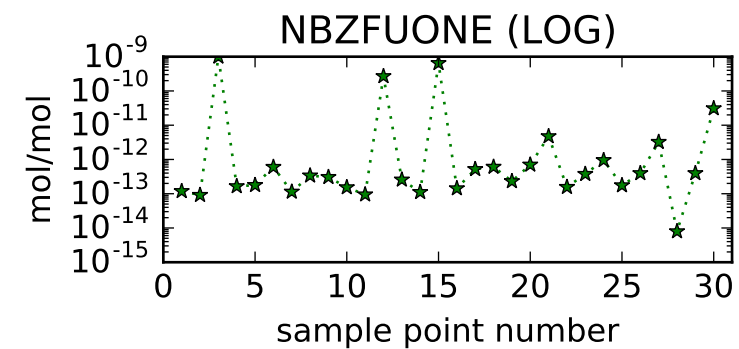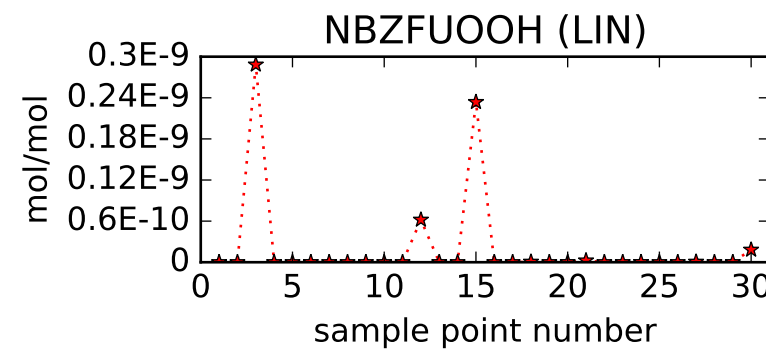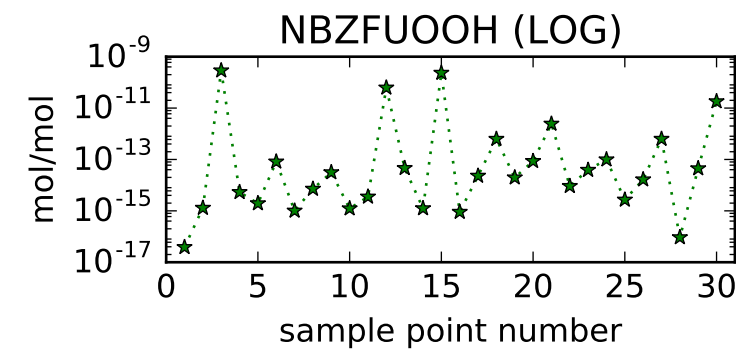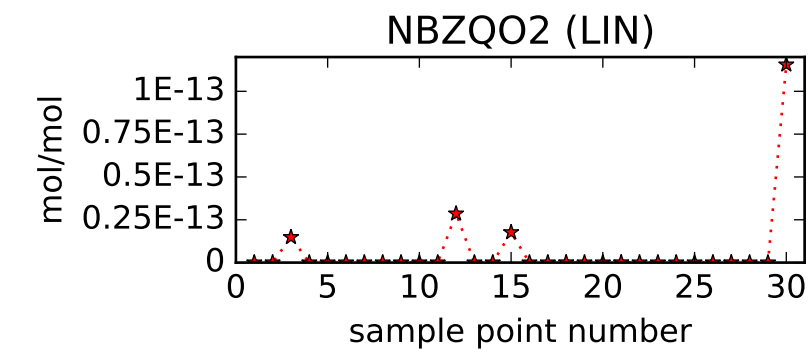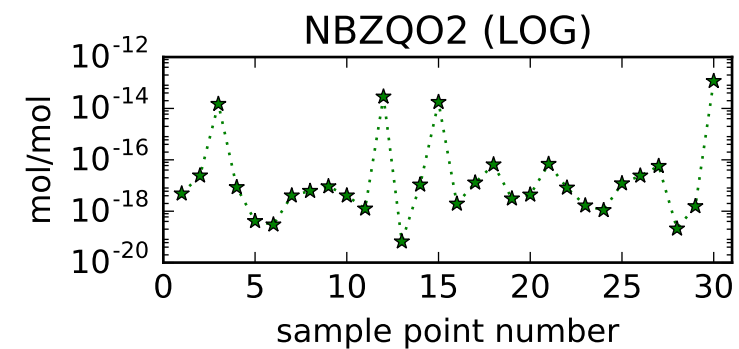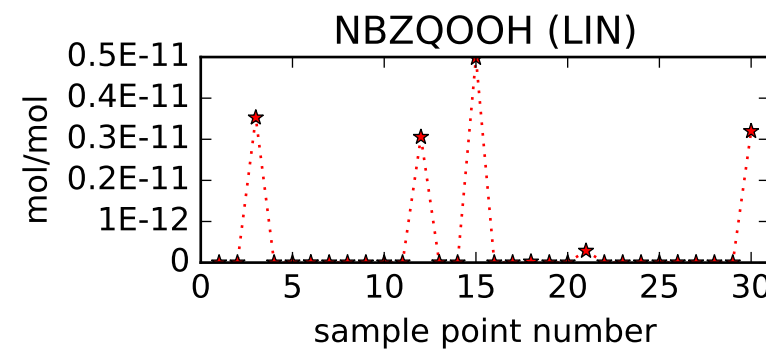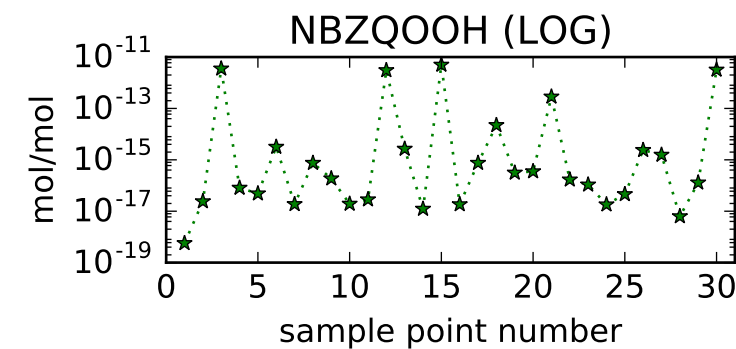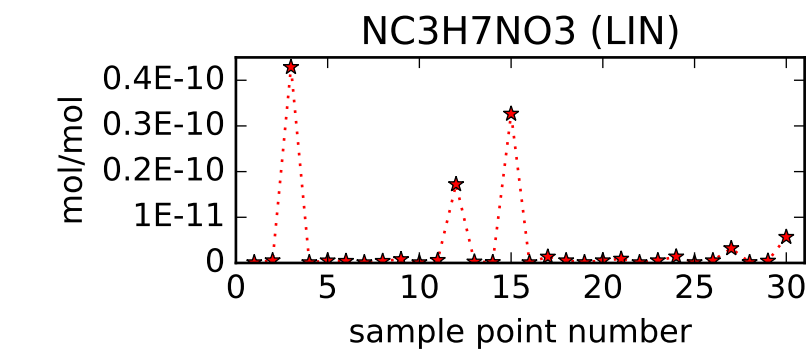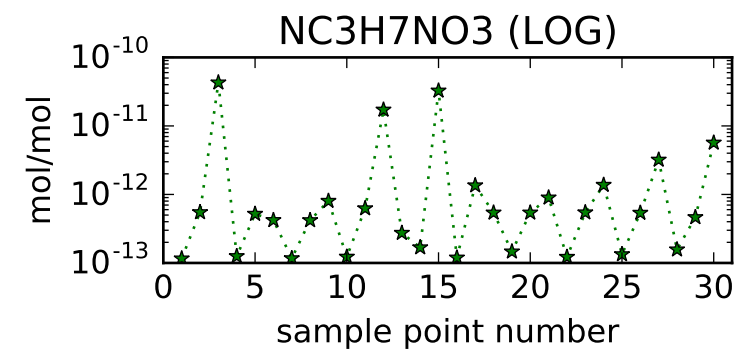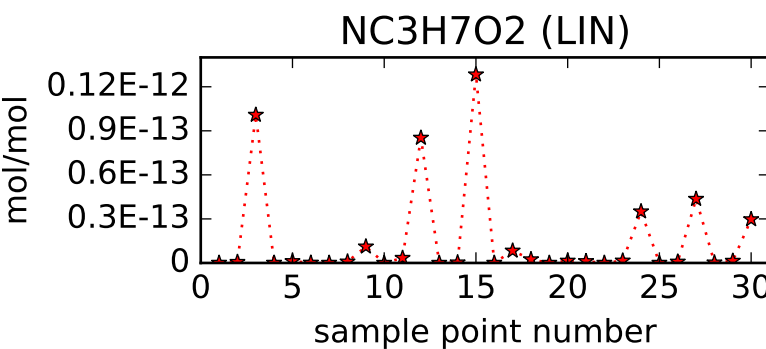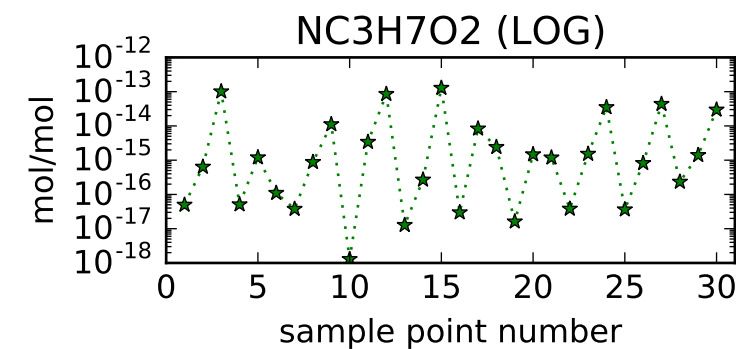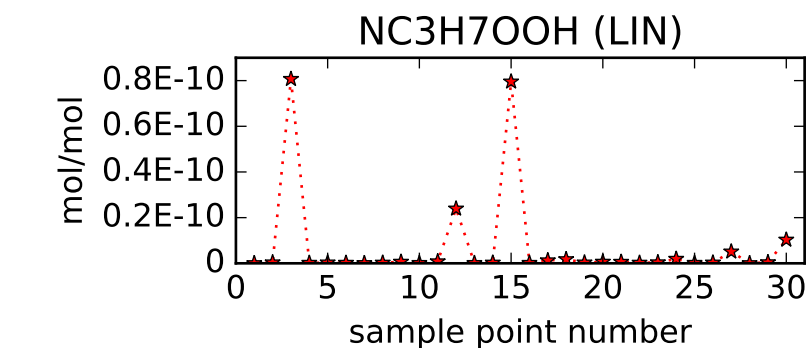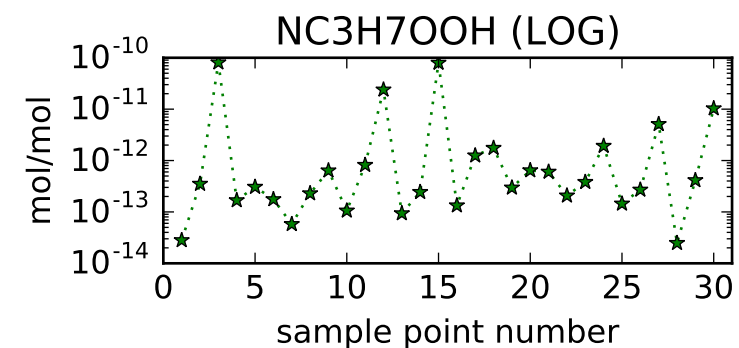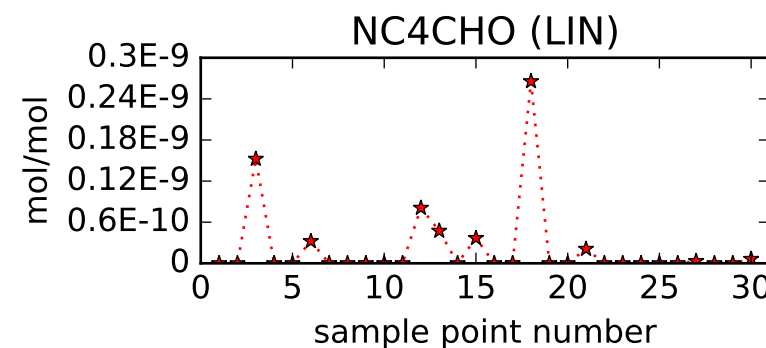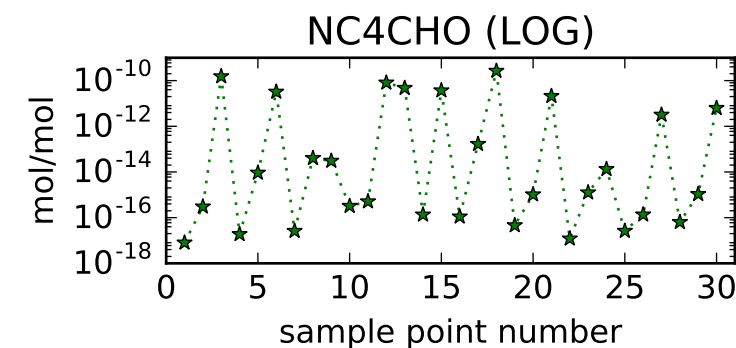

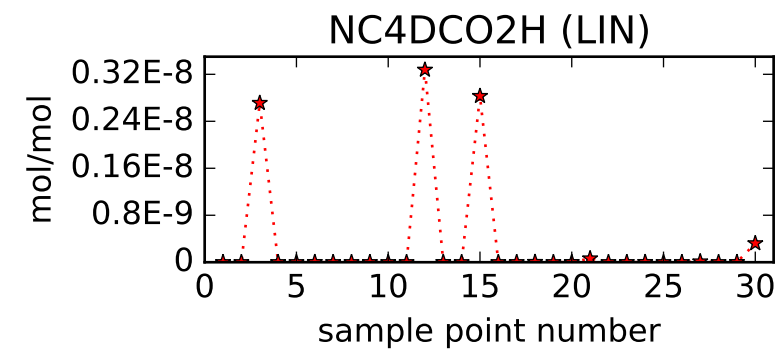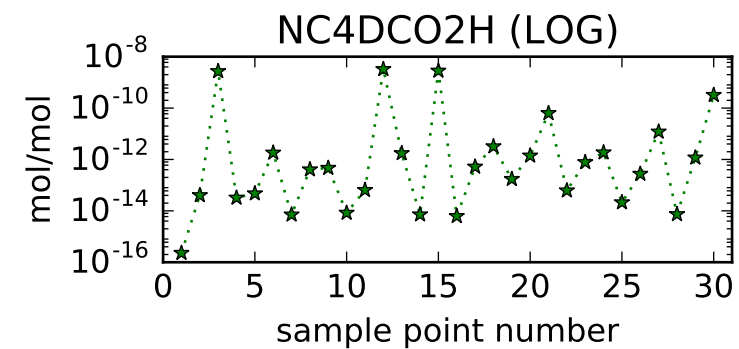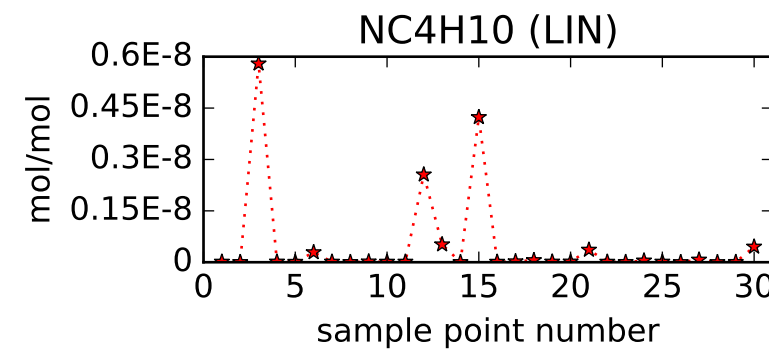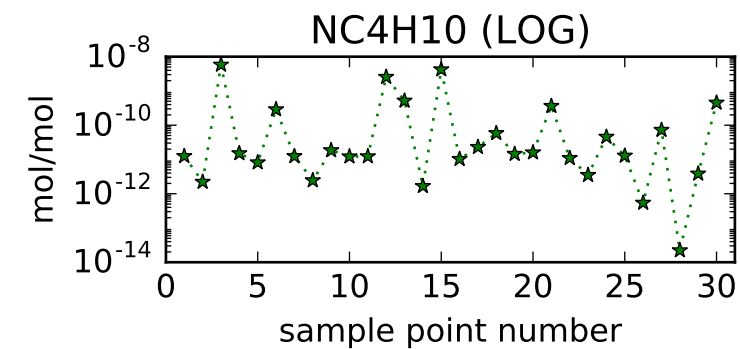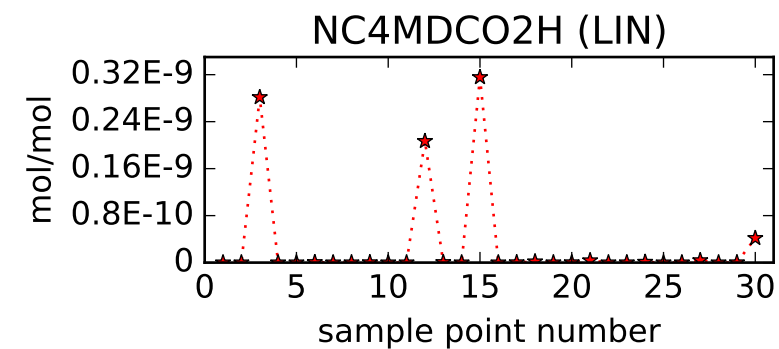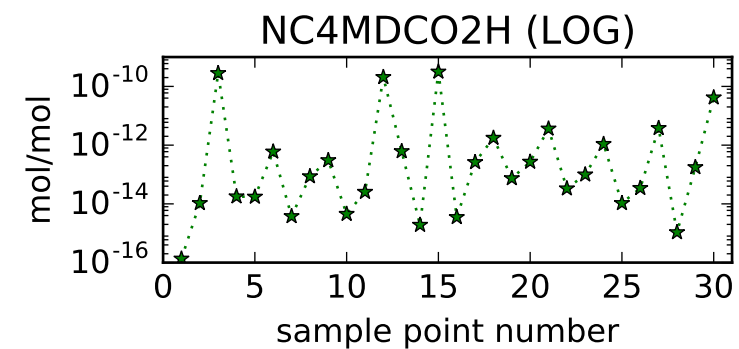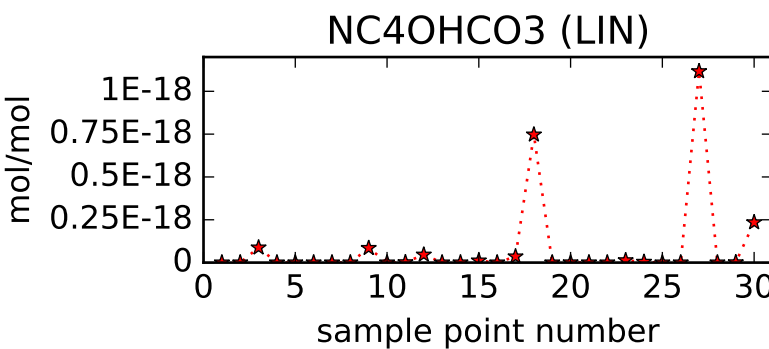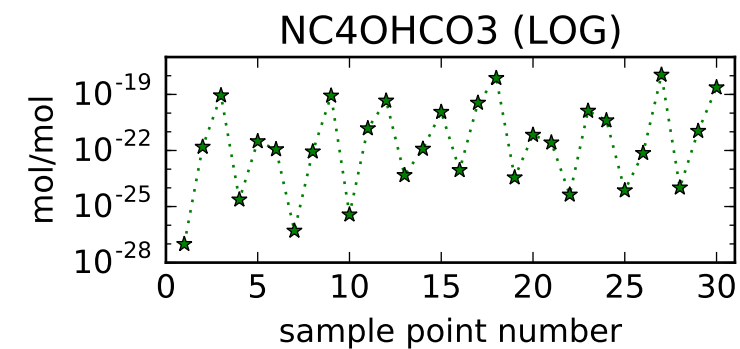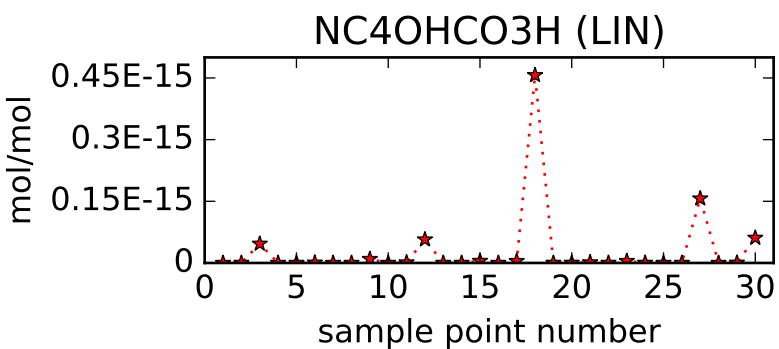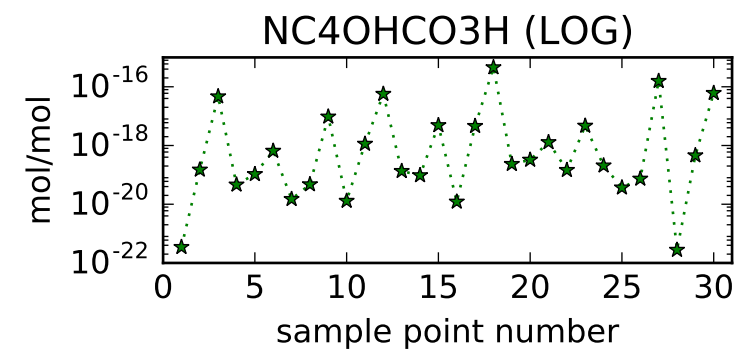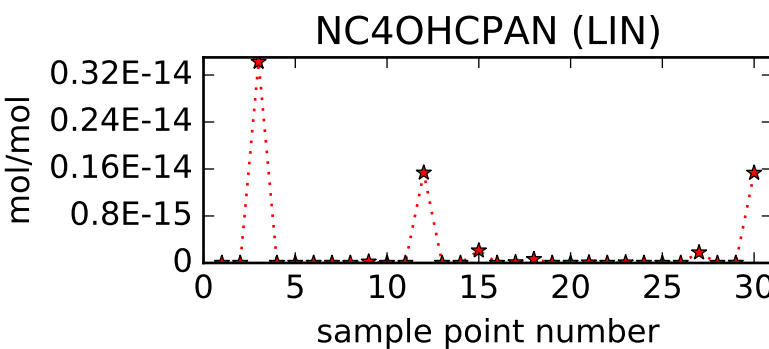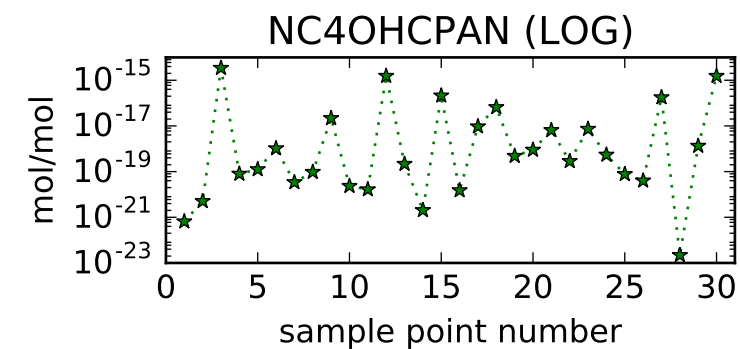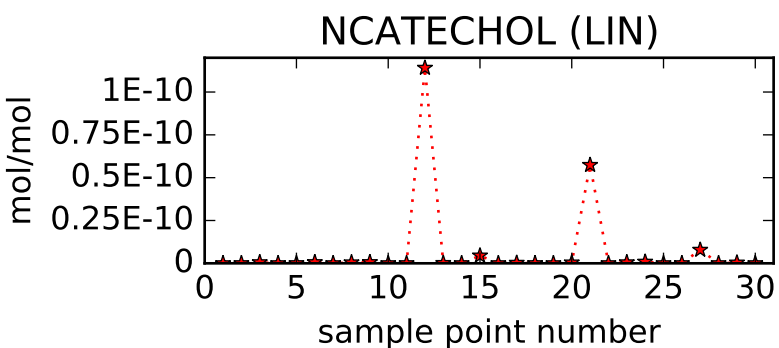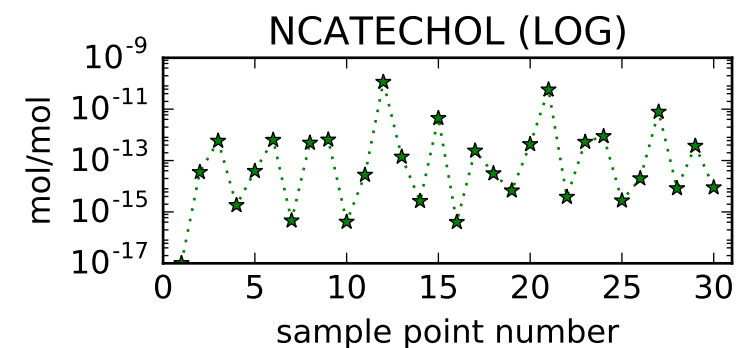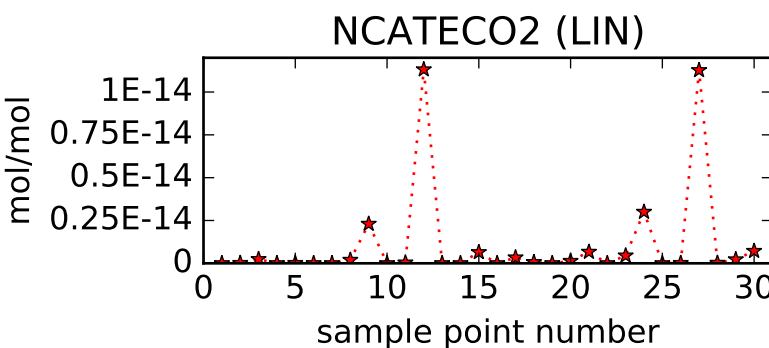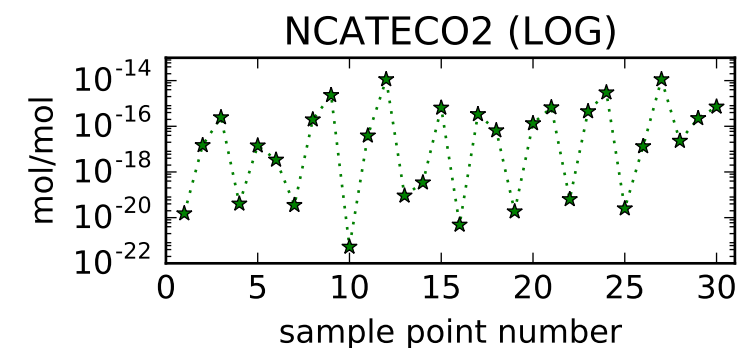

NCATECOOH (LIN)

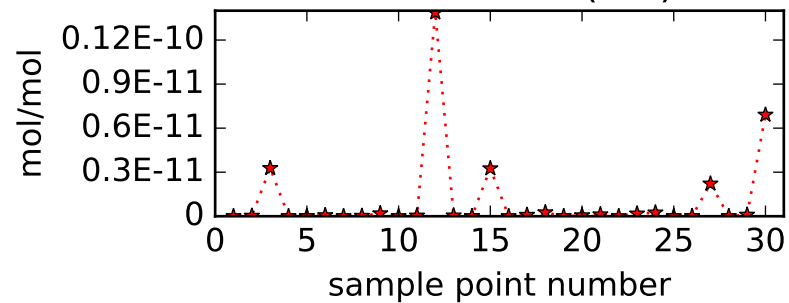

NCATECOOH (LOG)

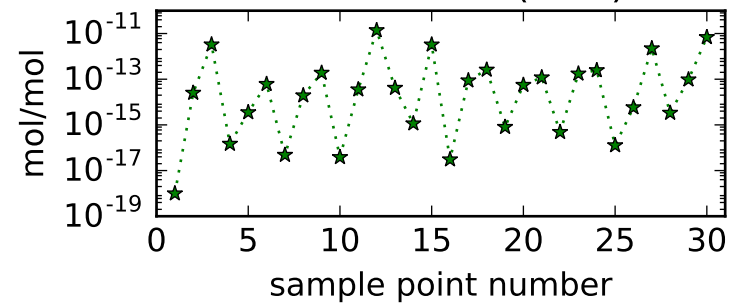

NCCH2O2 (LIN)

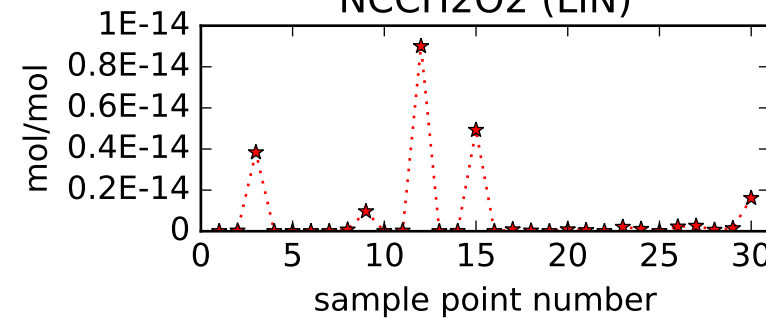

NCCH2O2 (LOG)

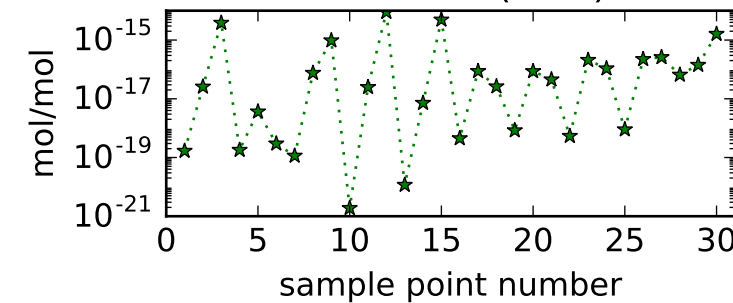

NCO (LIN)

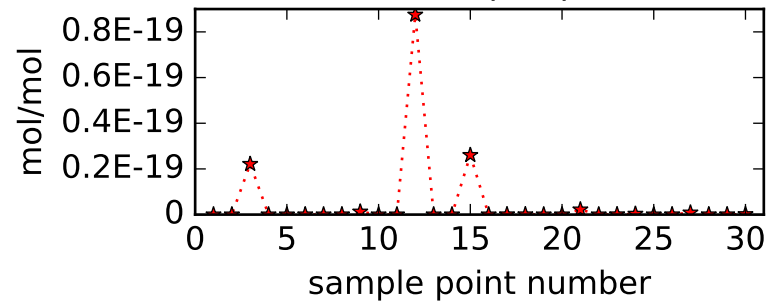

NCO (LOG)

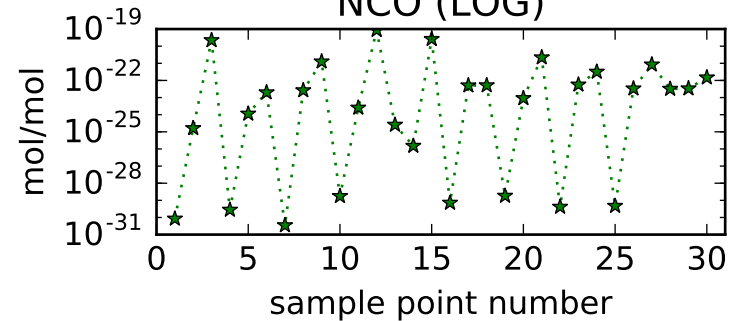

NCPDKETENE (LIN)

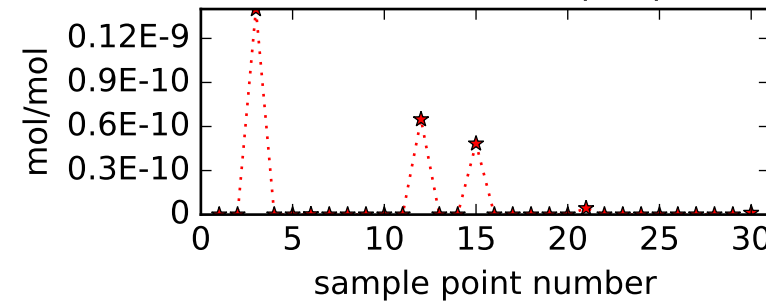

NCPDKETENE (LOG)

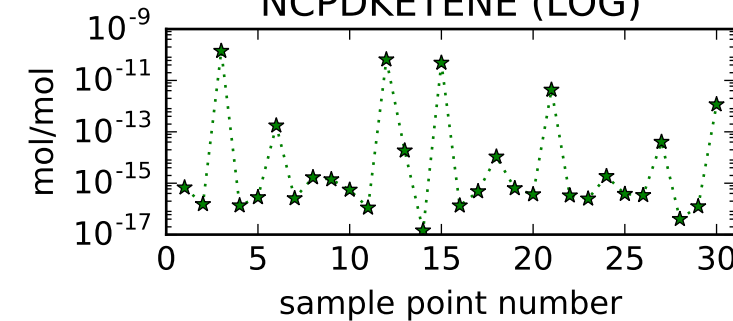

NCRES1O (LIN)

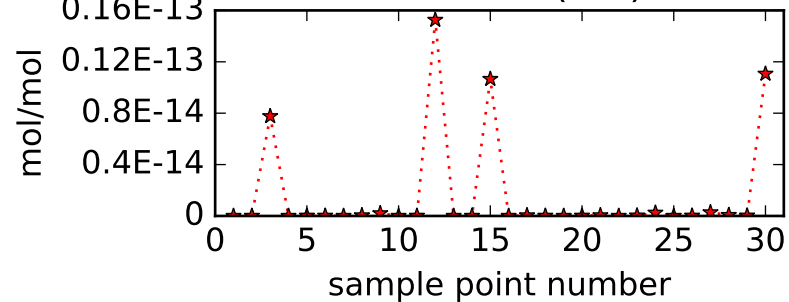

NCRES1O (LOG)

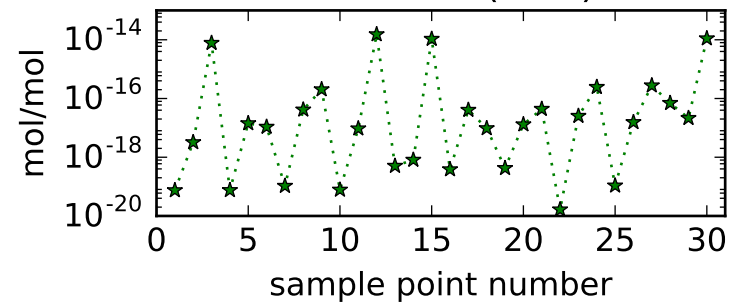

NCRES1O2 (LIN)

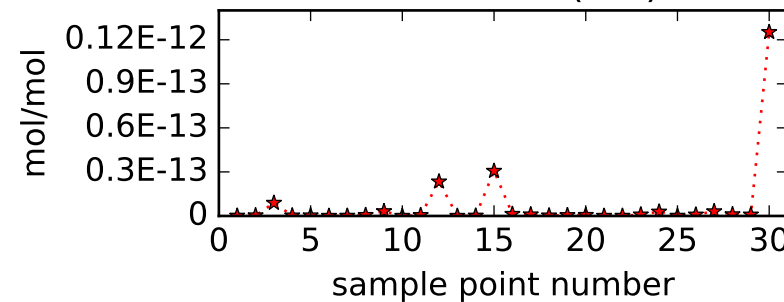

NCRES1O2 (LOG)

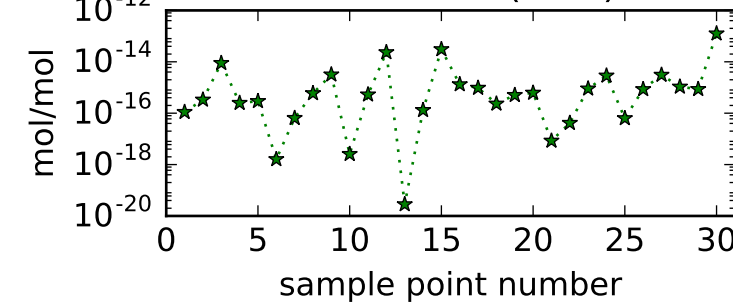

NCRES1OOH (LIN)

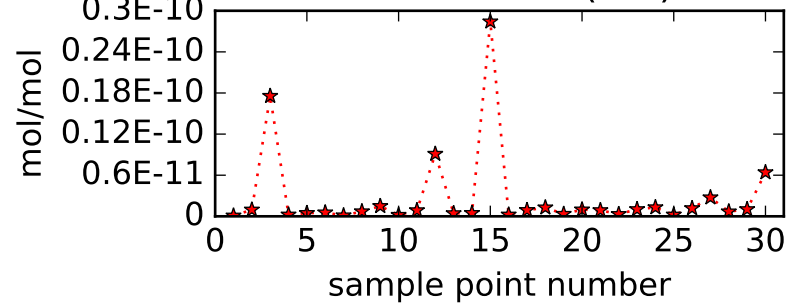

NCRES1OOH (LOG)

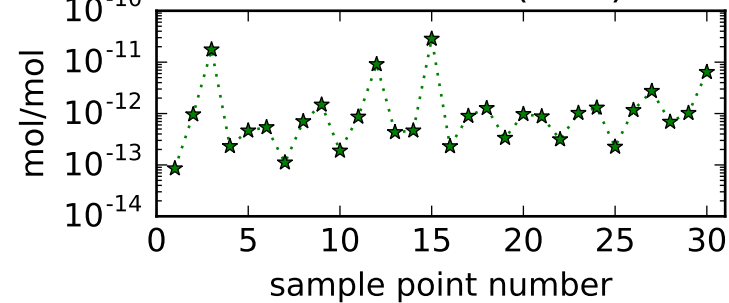

NCRESO2 (LIN)

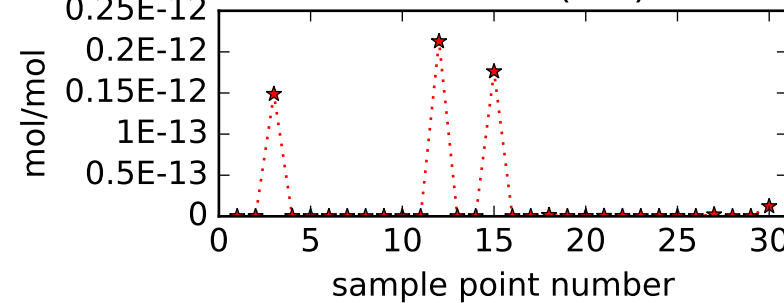

NCRESO2 (LOG)

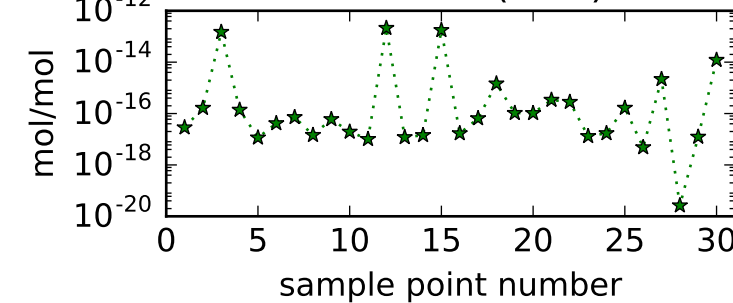



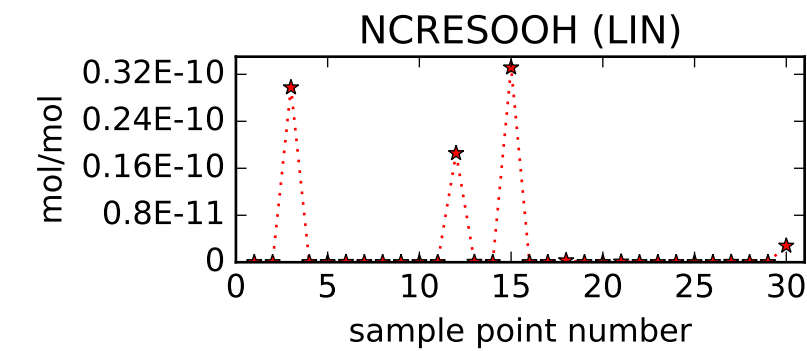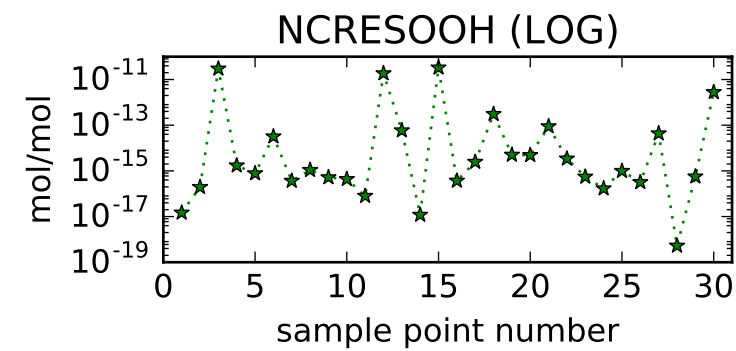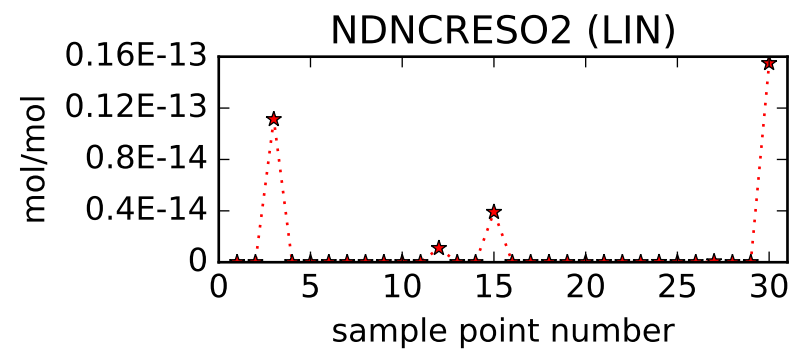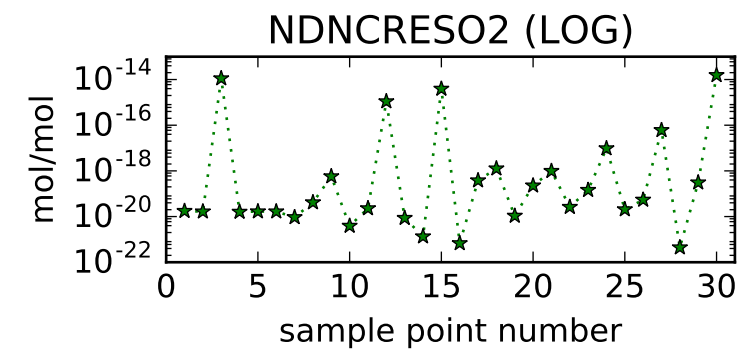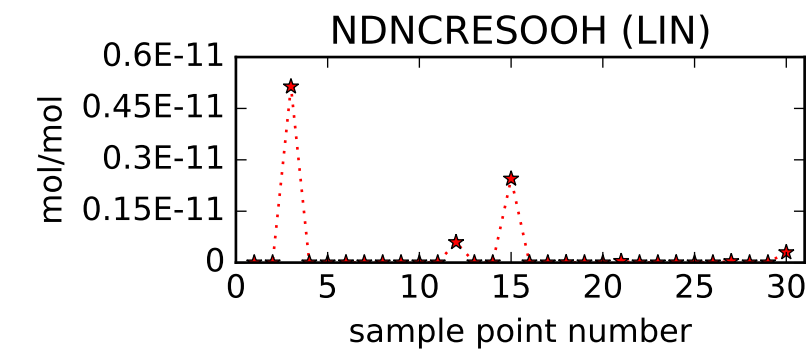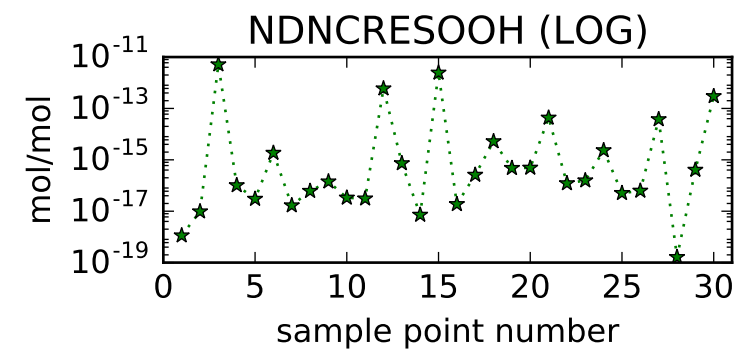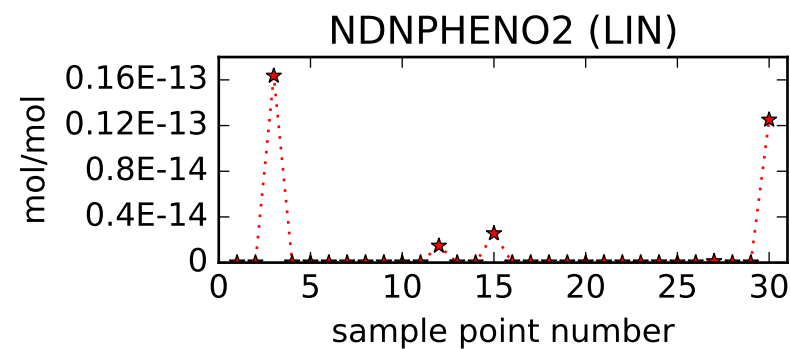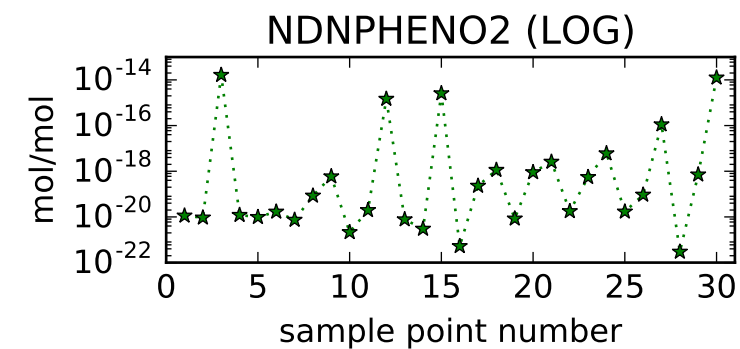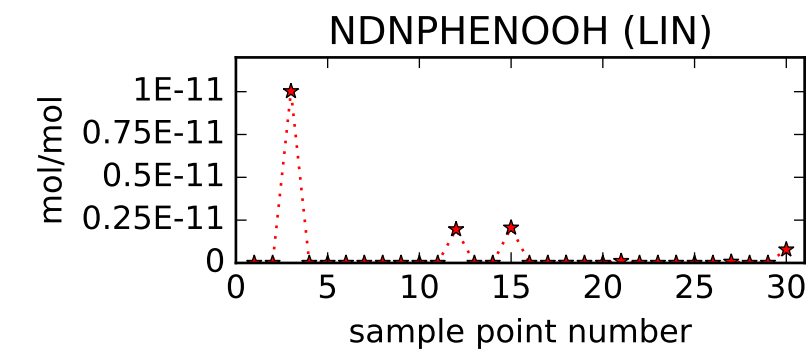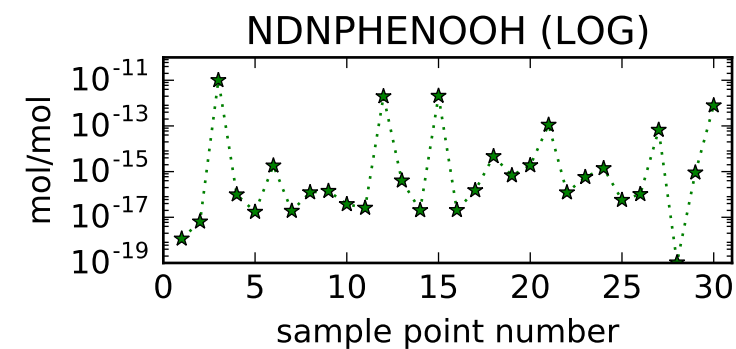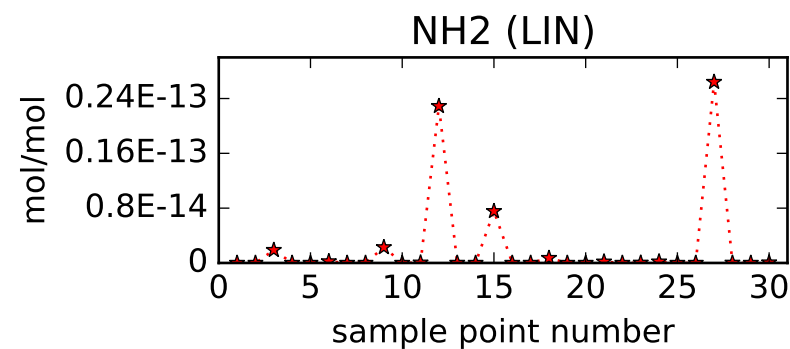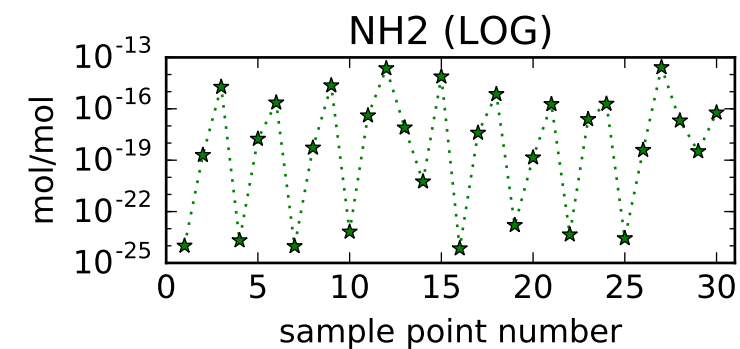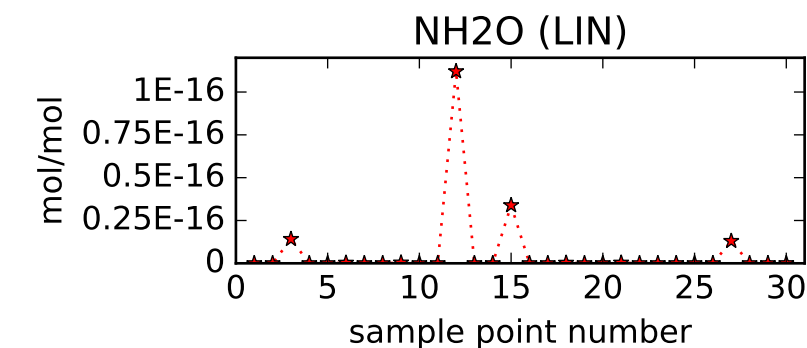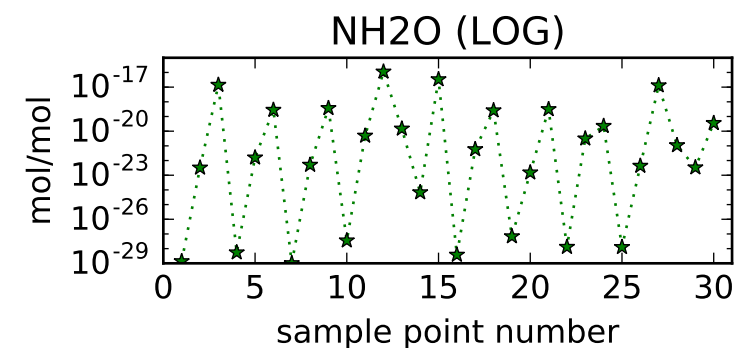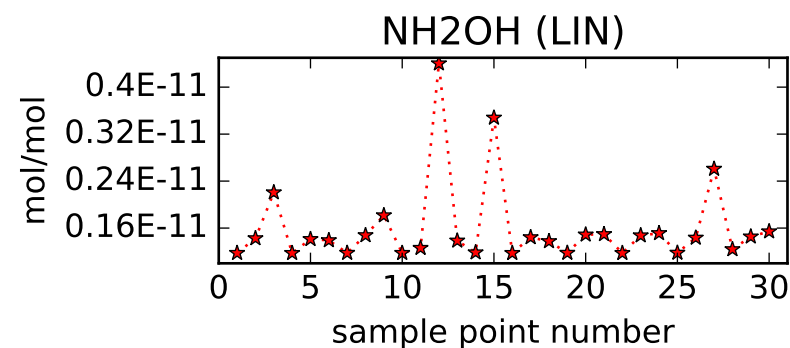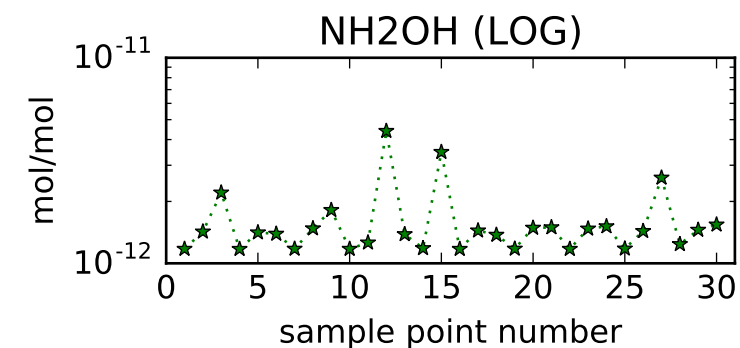

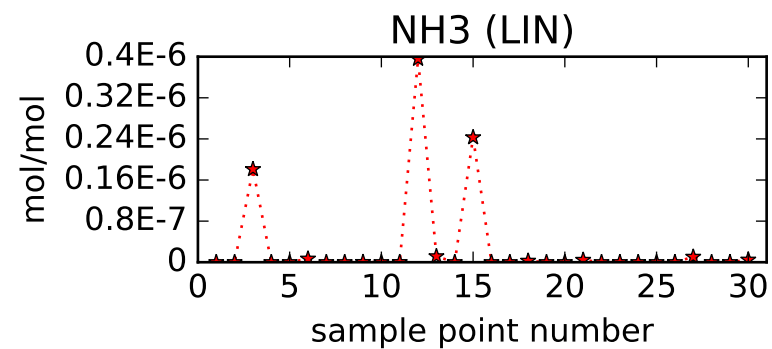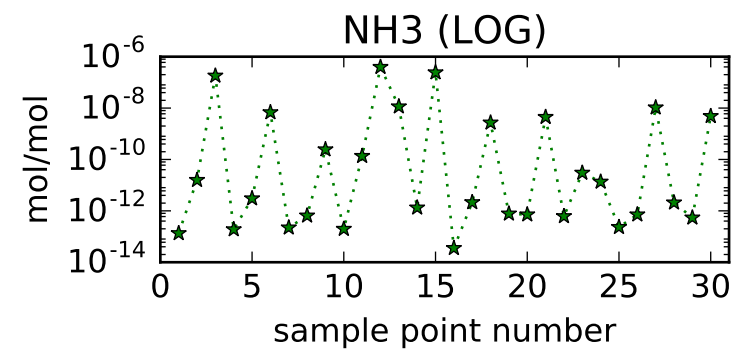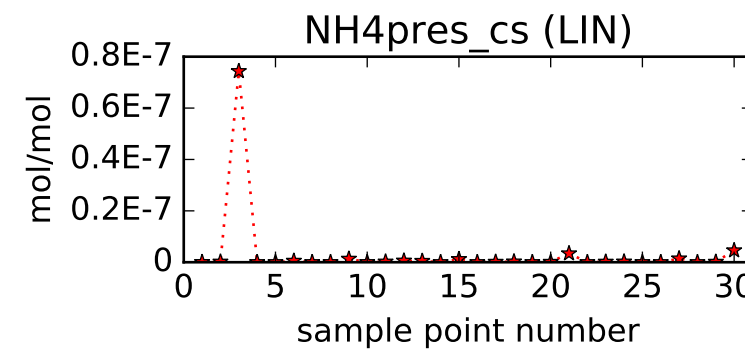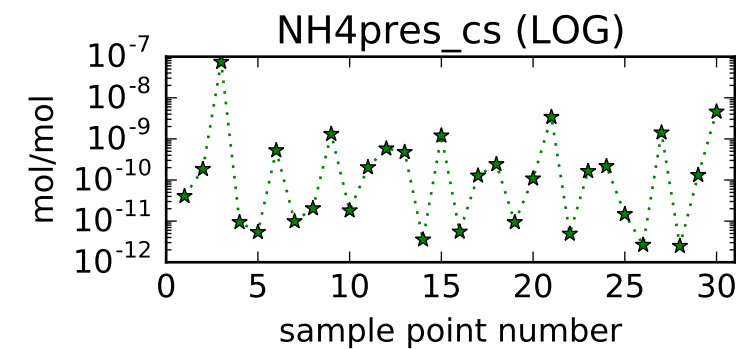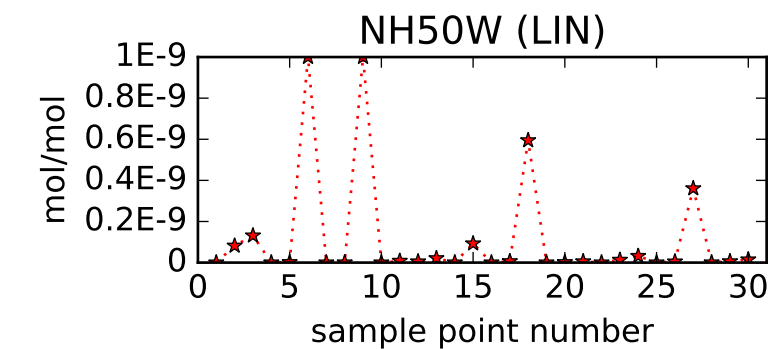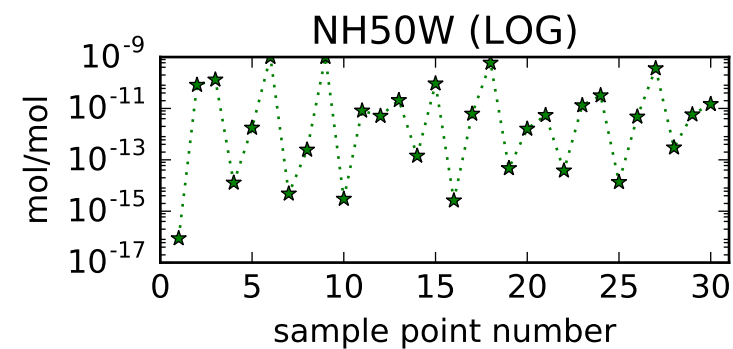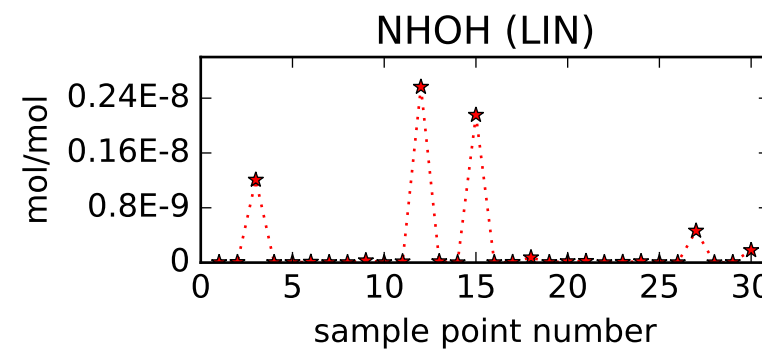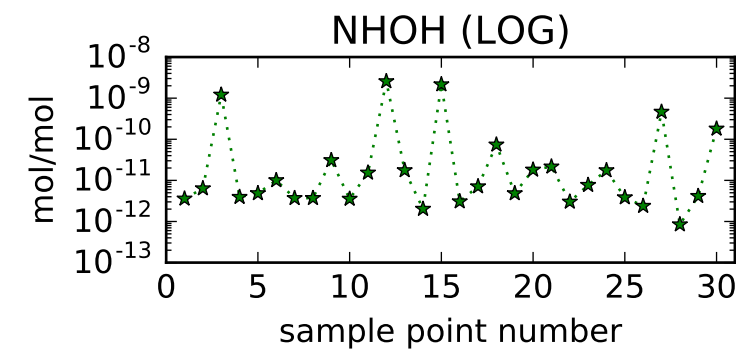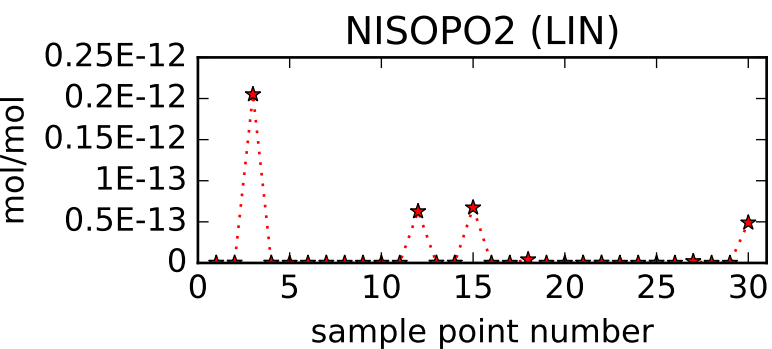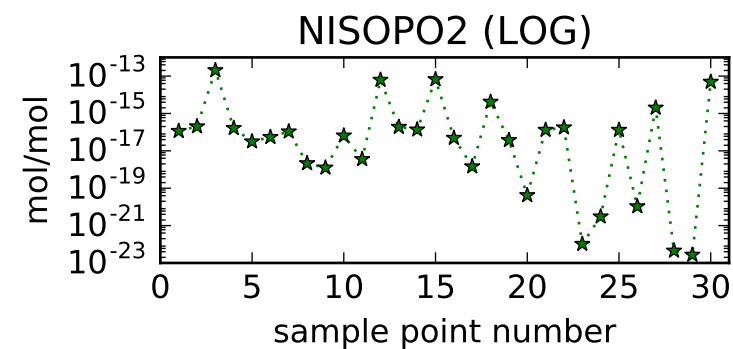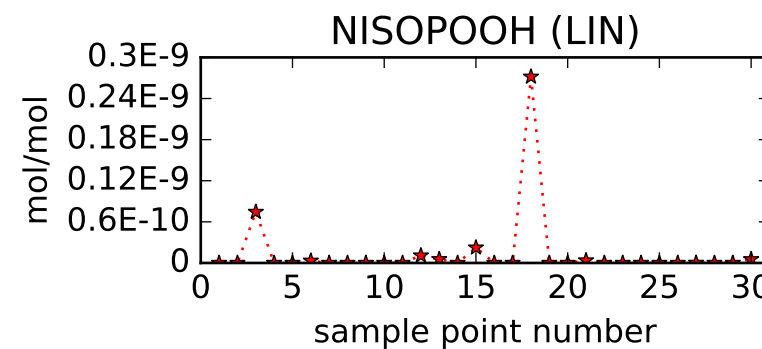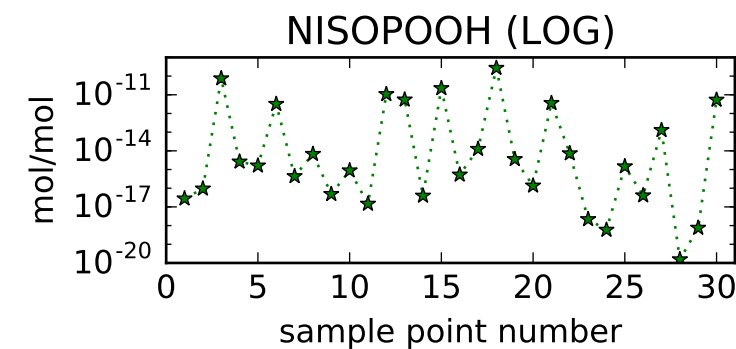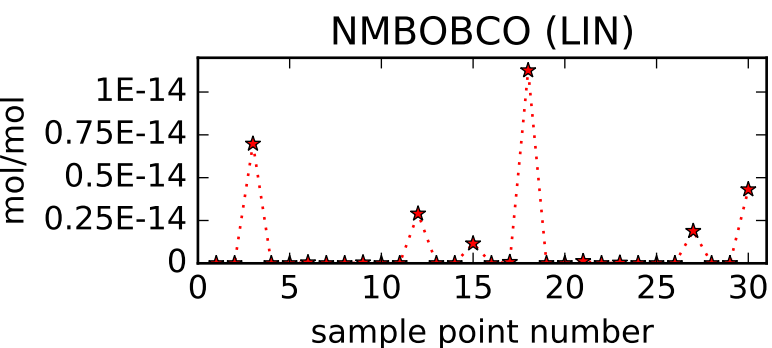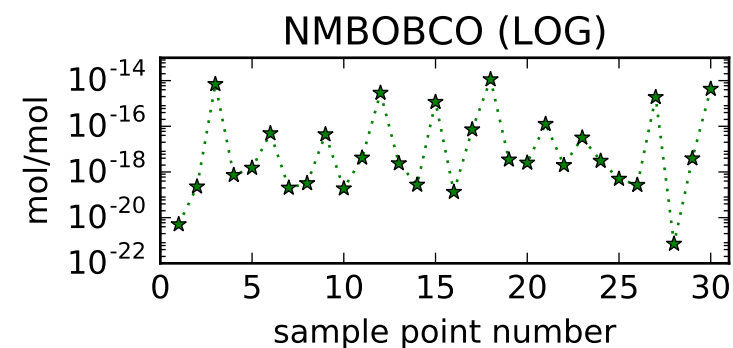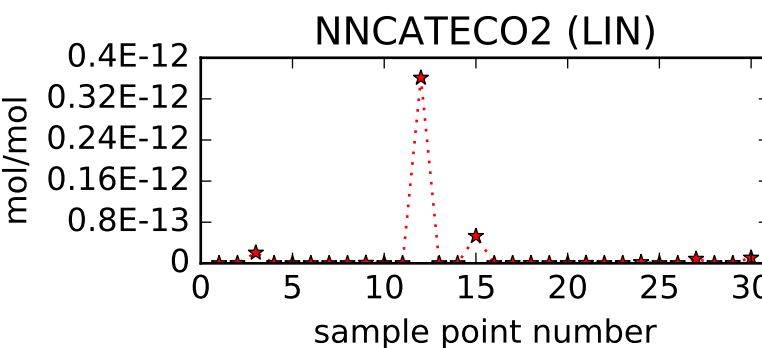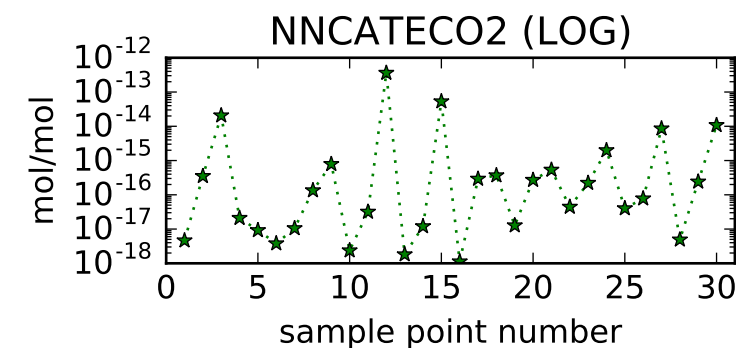

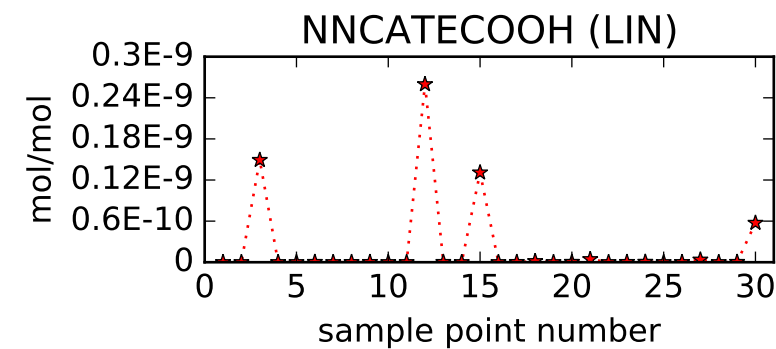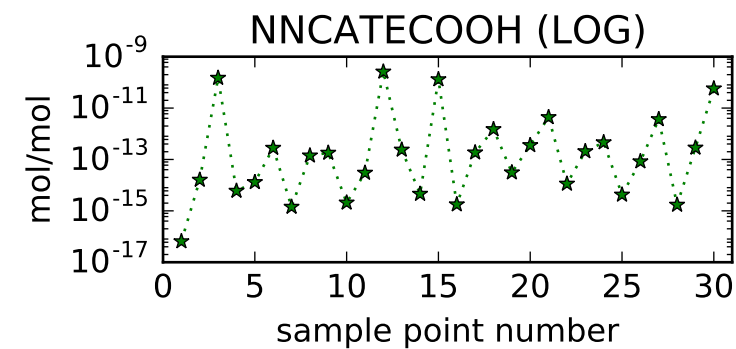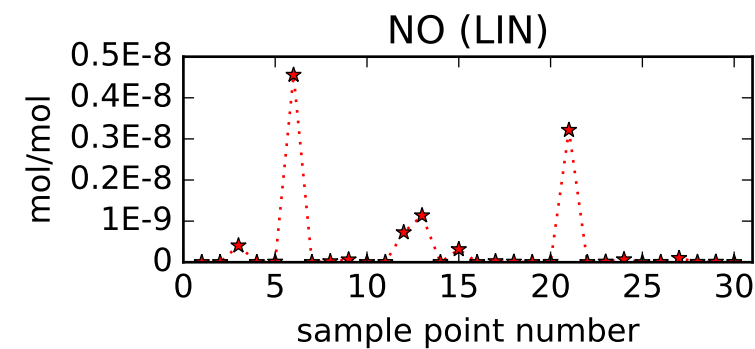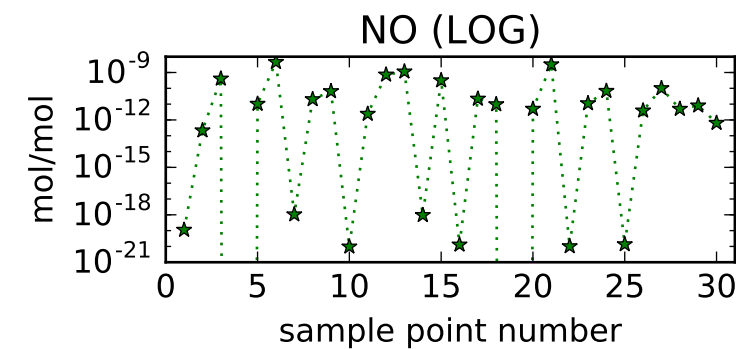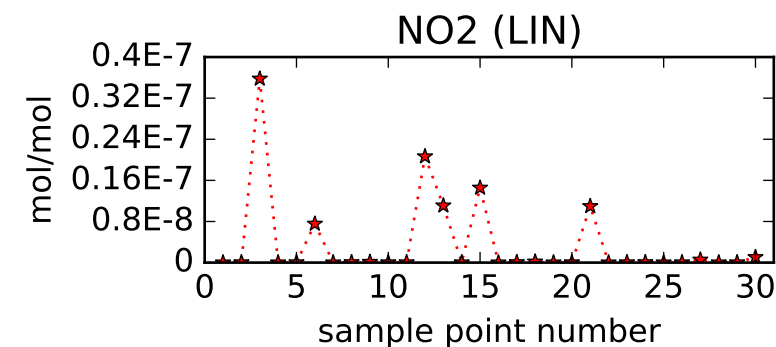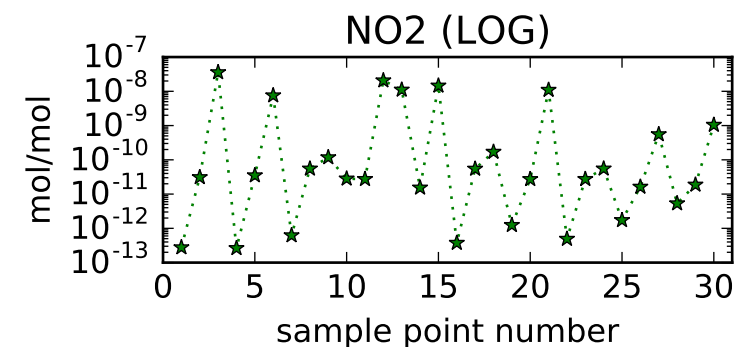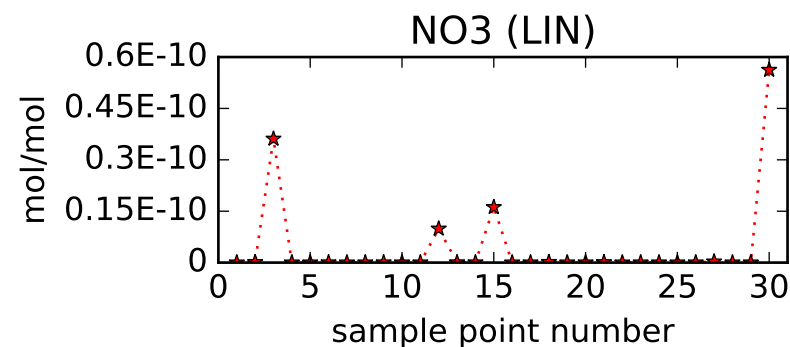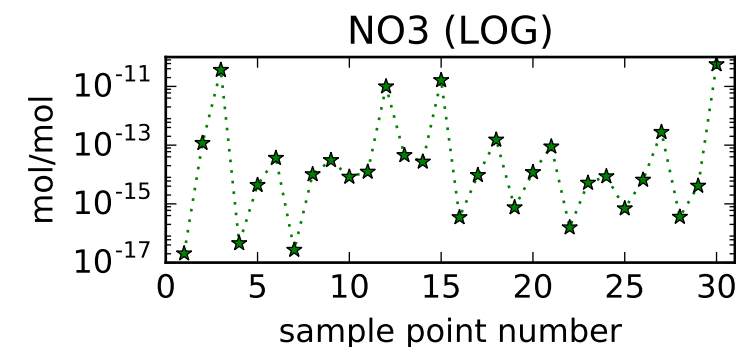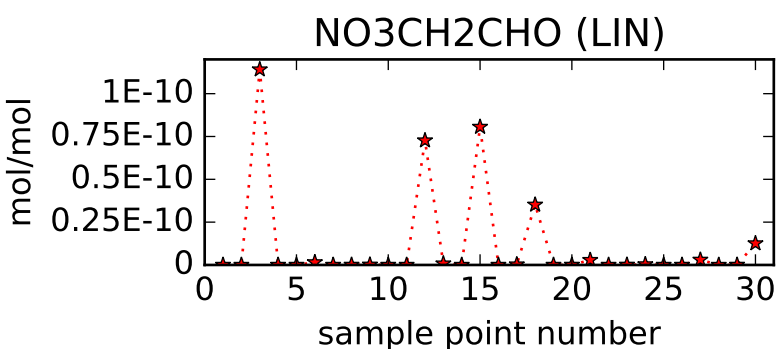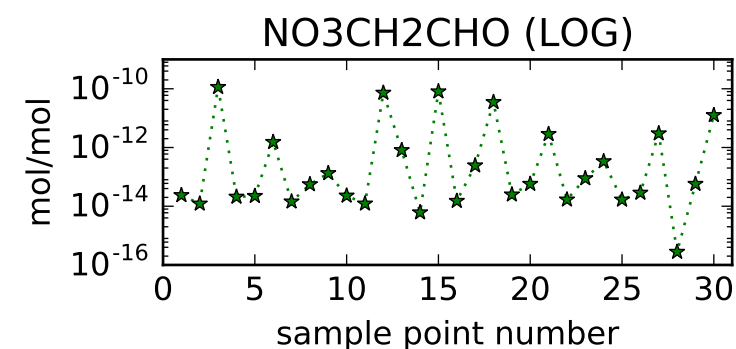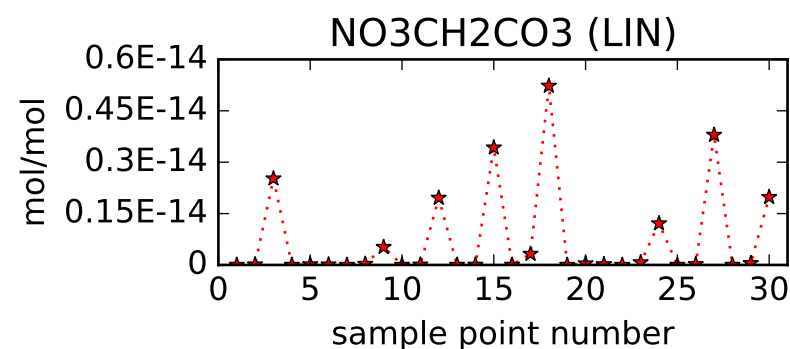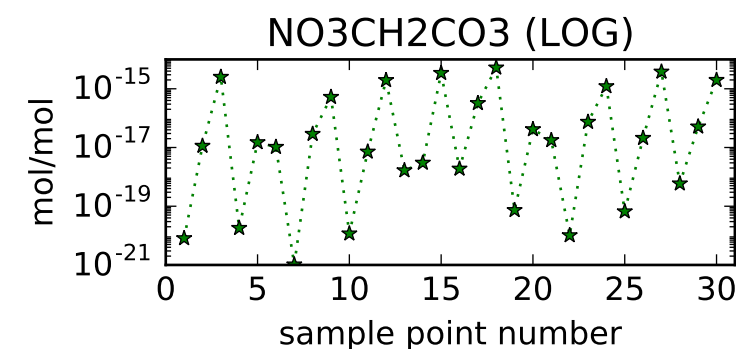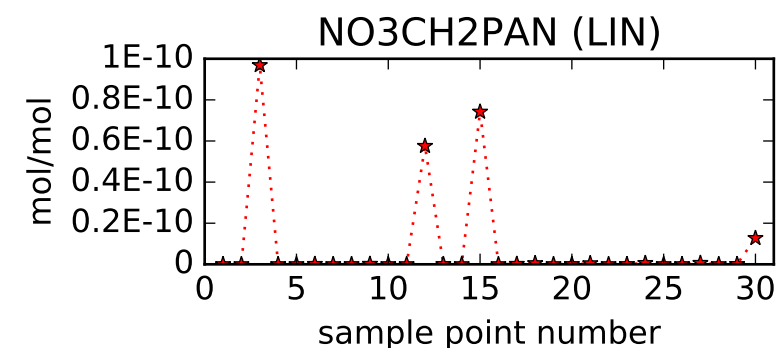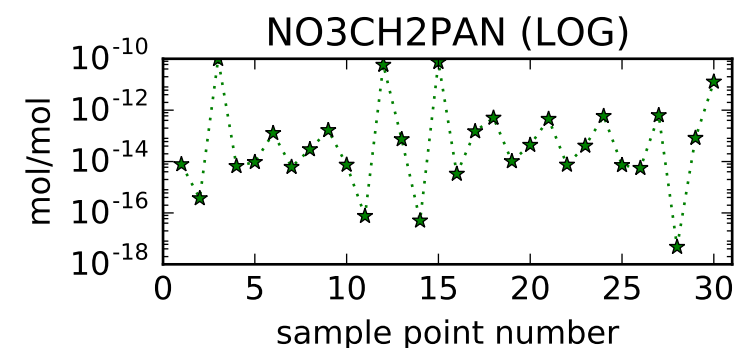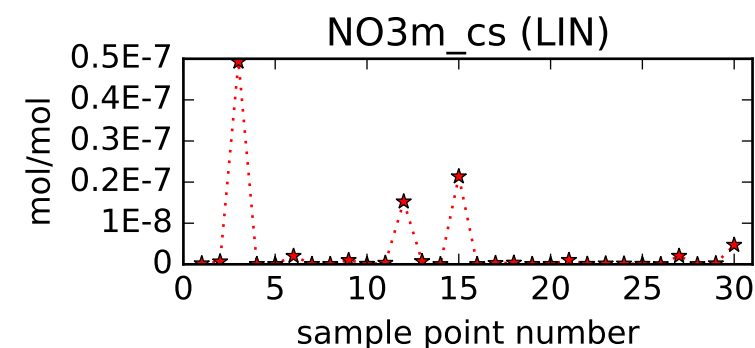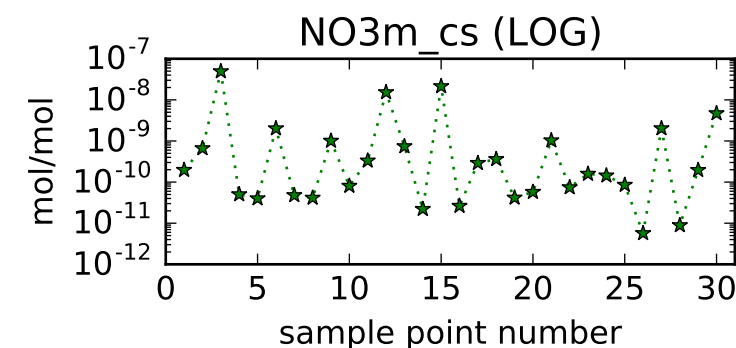

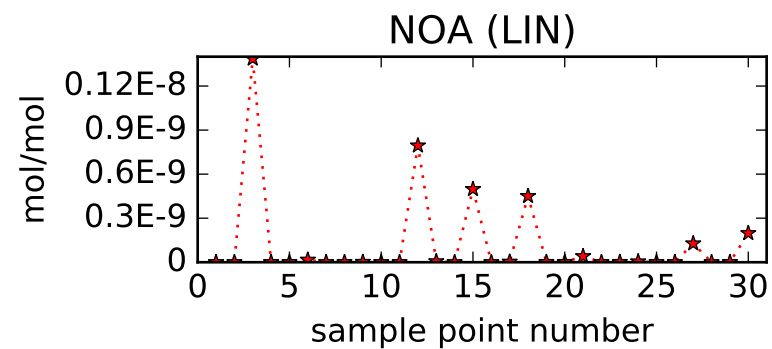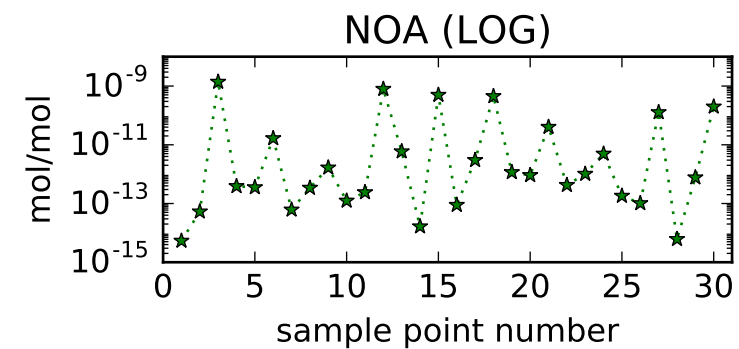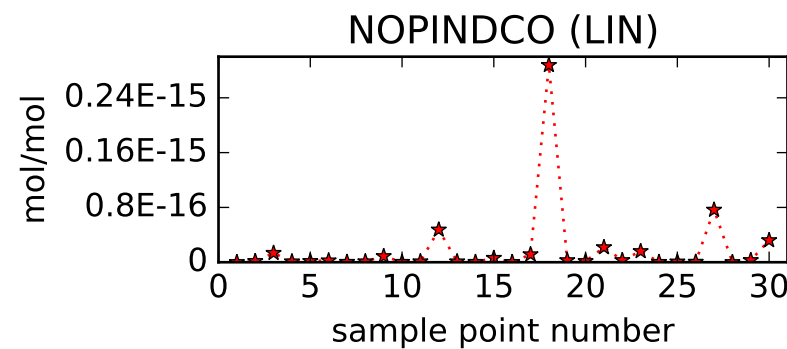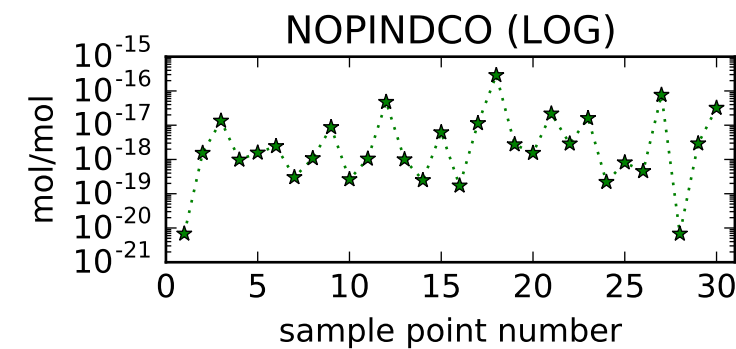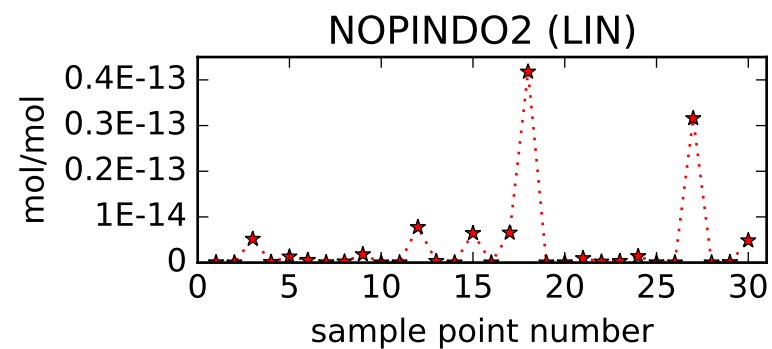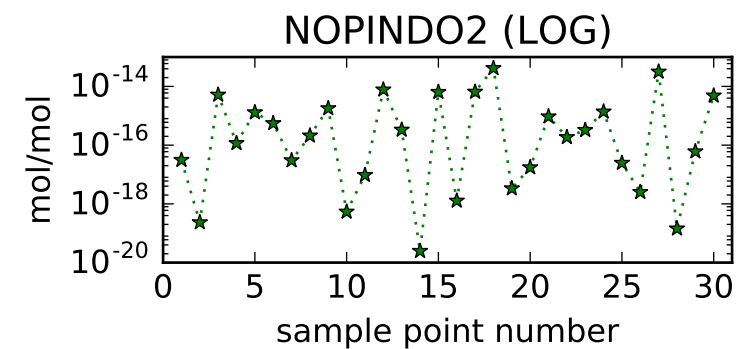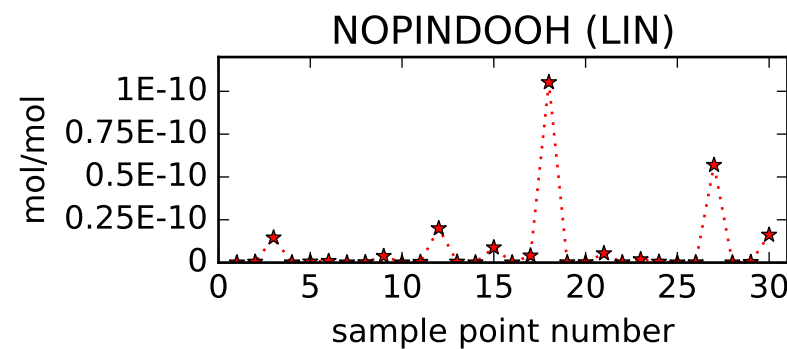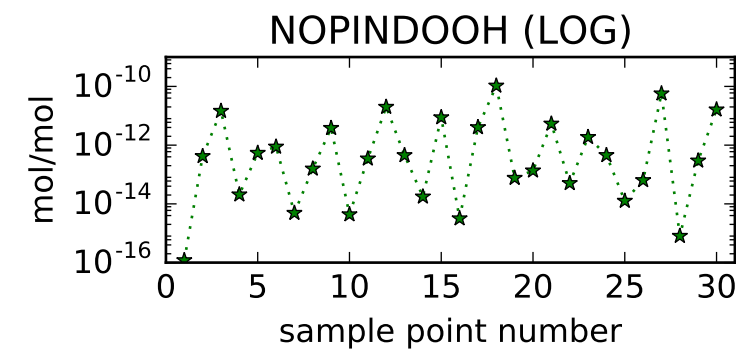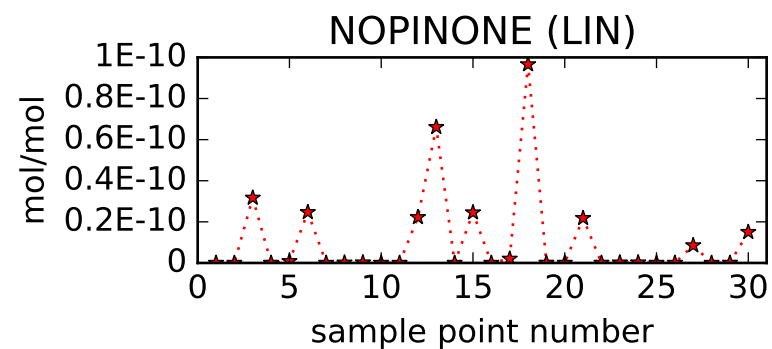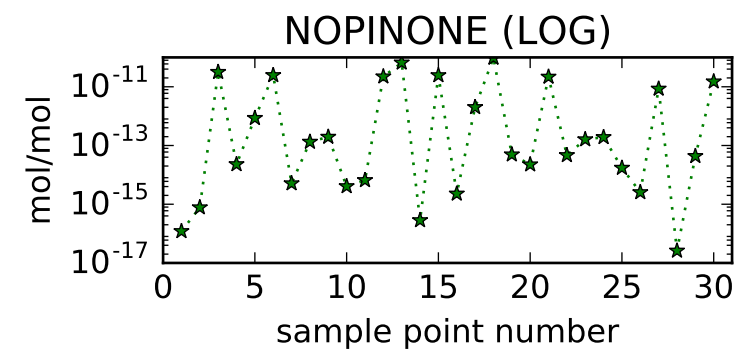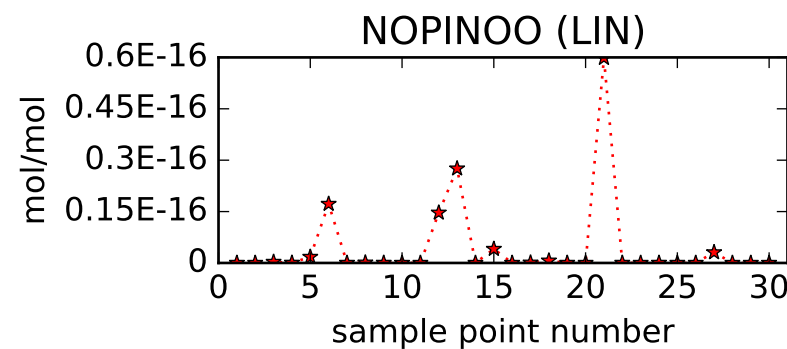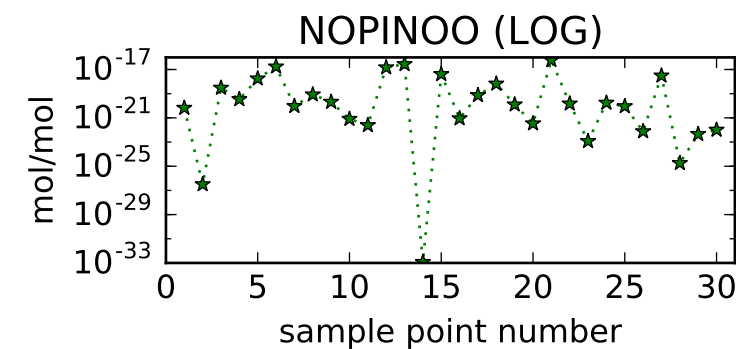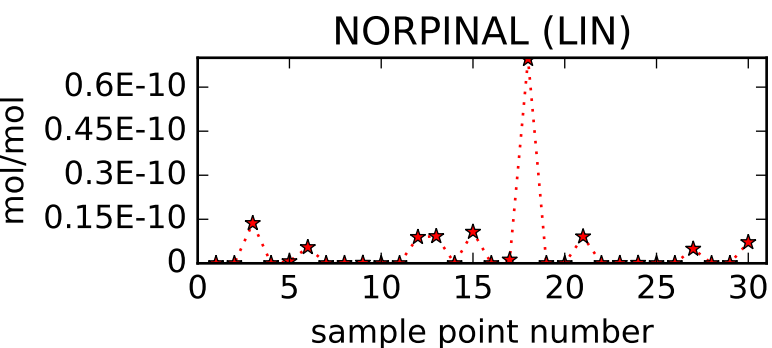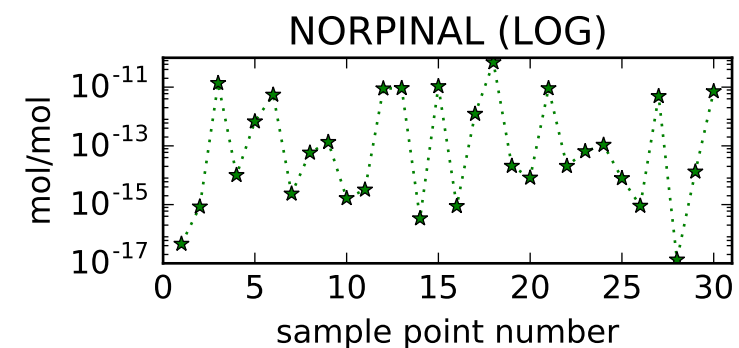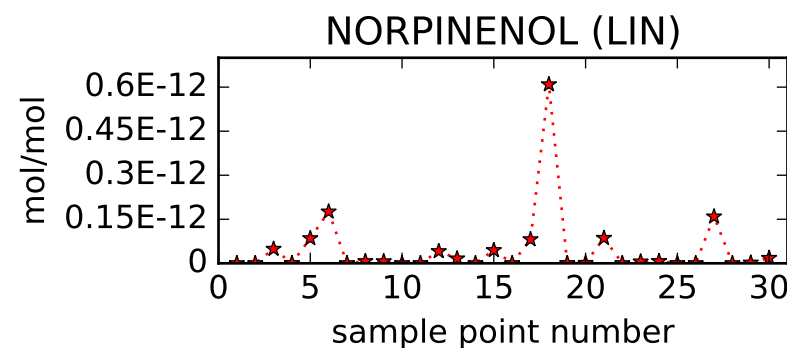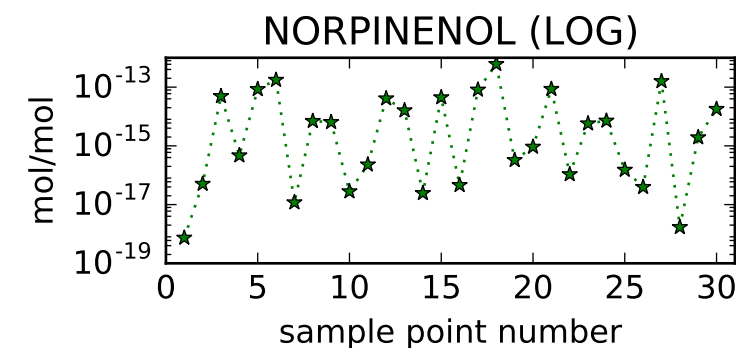

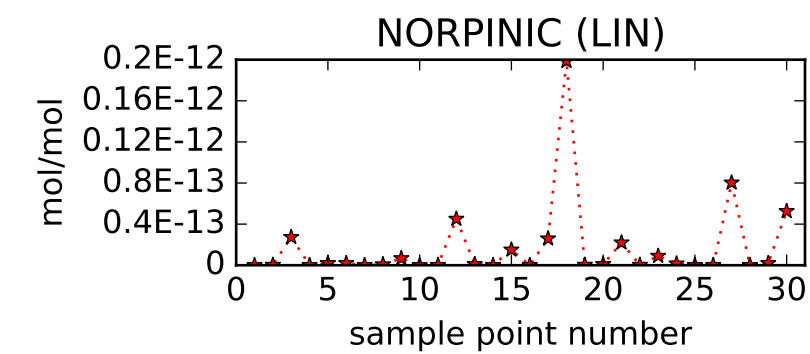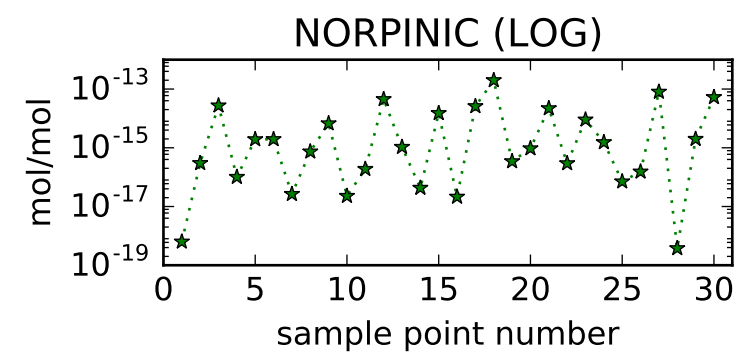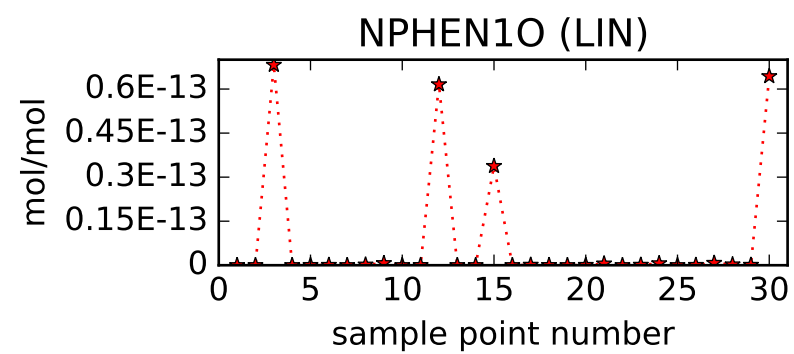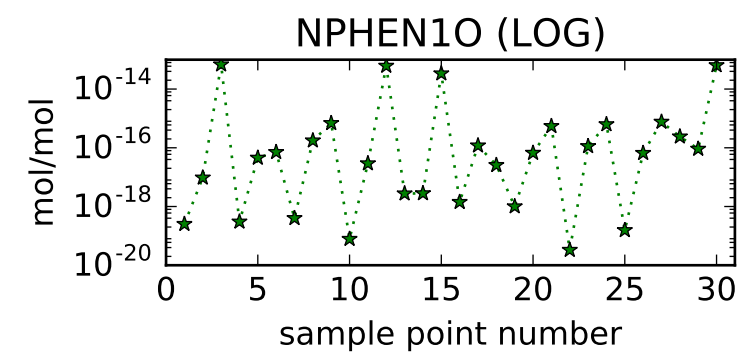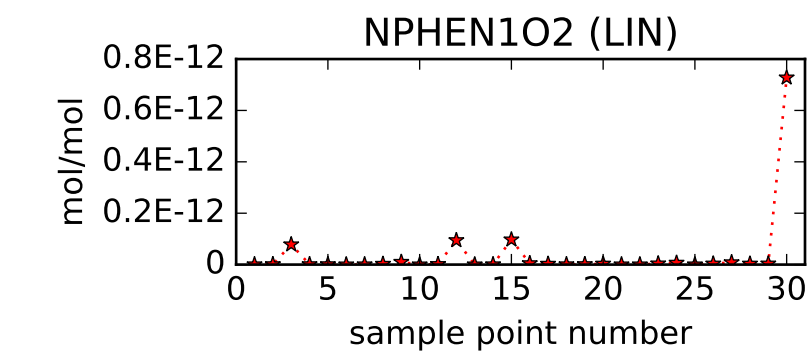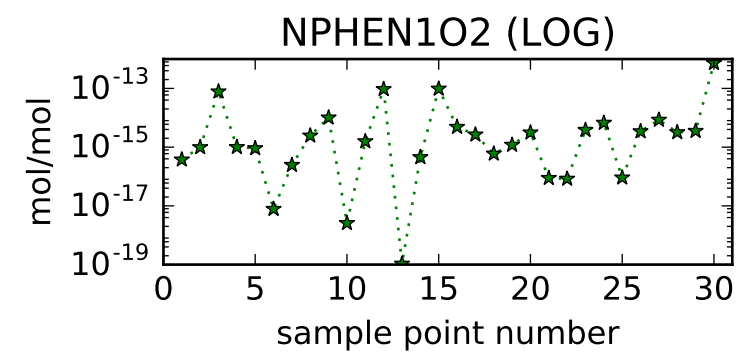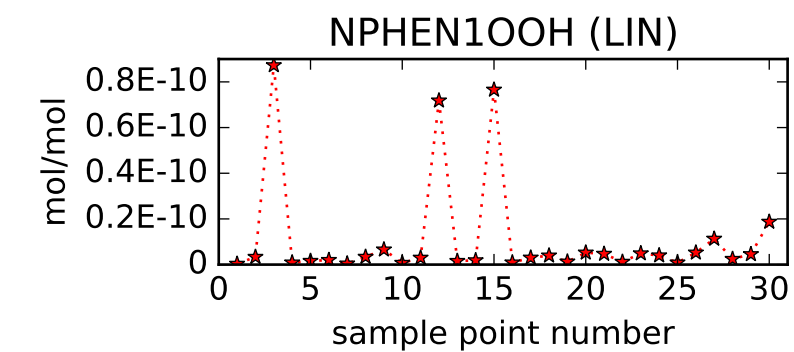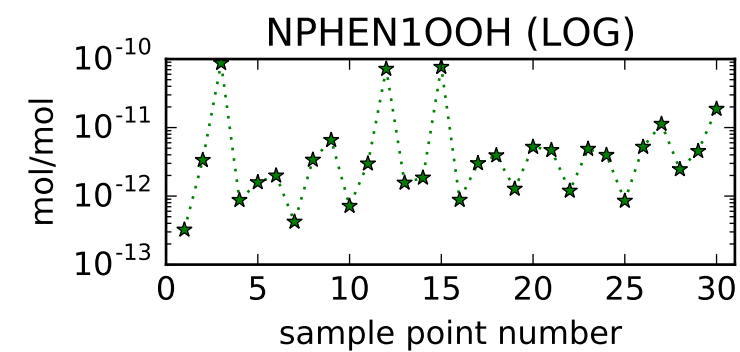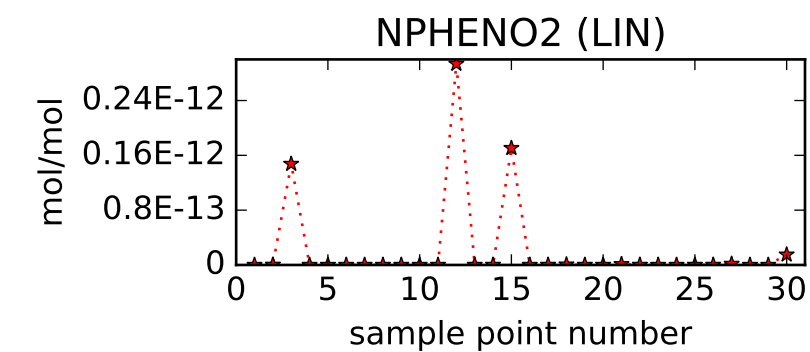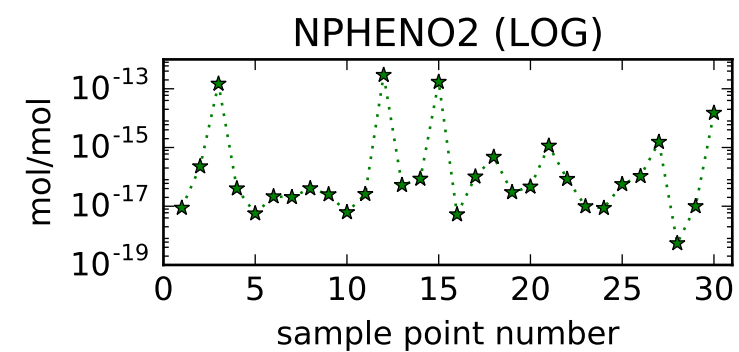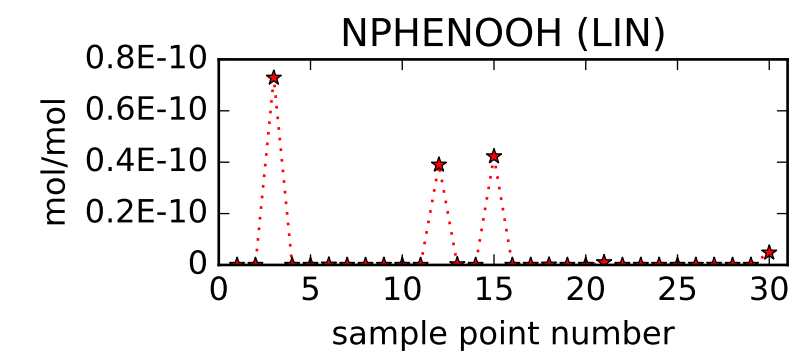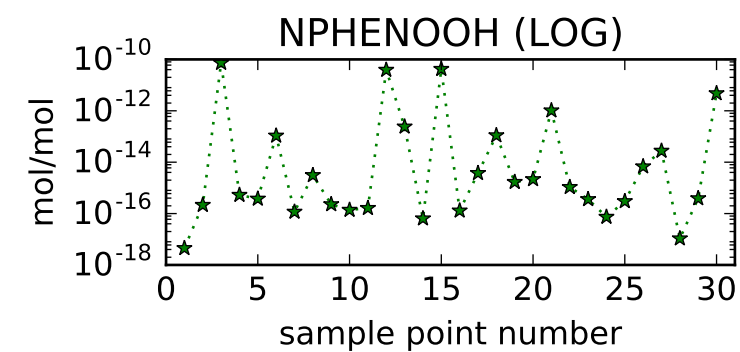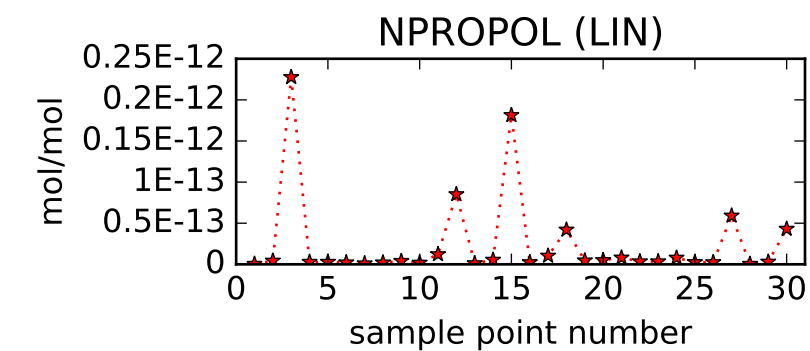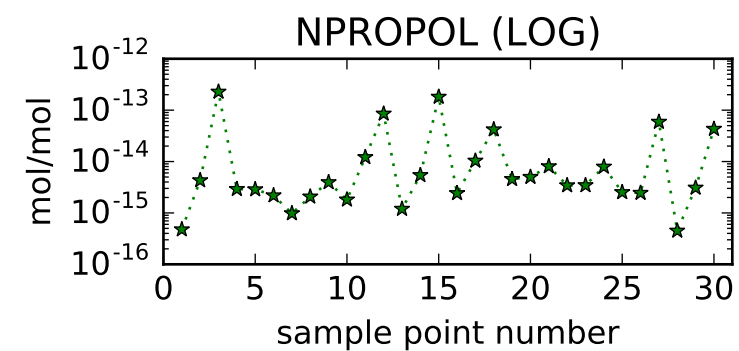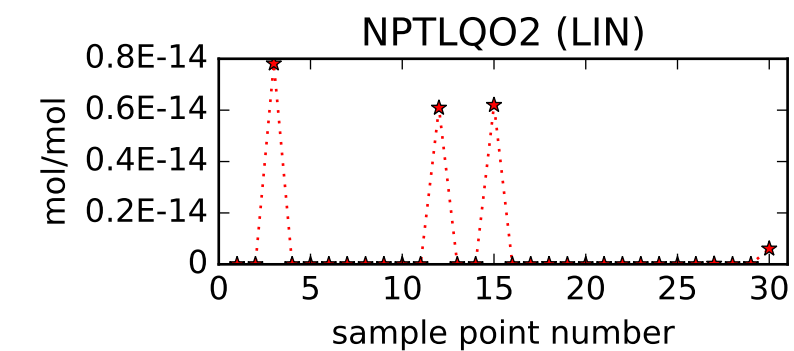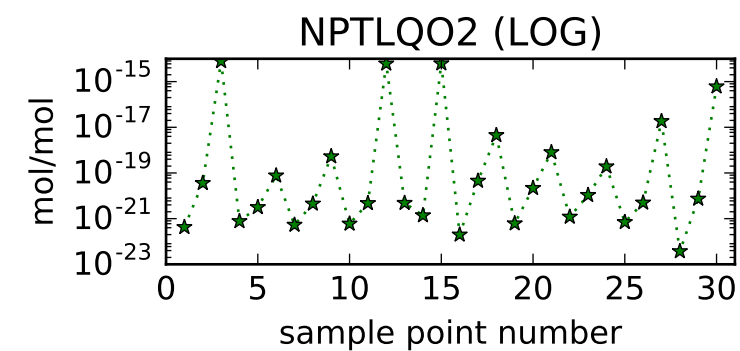



NPTLQOOH (LIN)

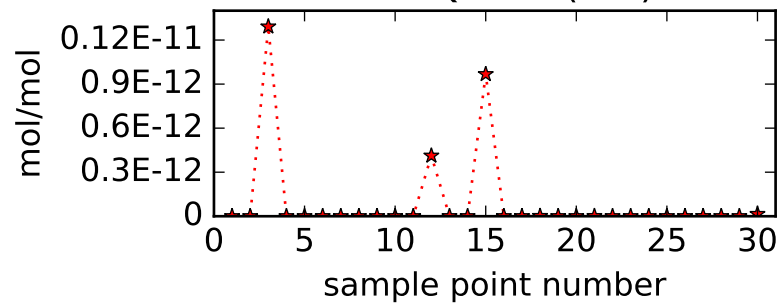

NPTLQOOH (LOG)

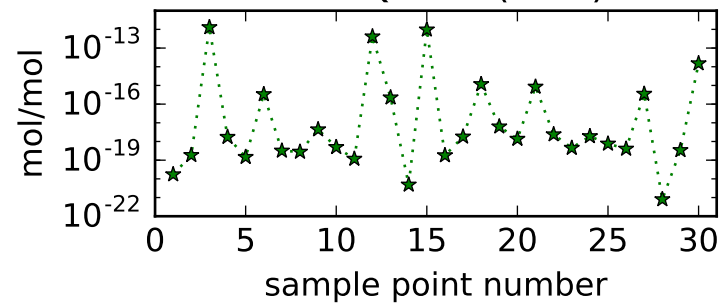

NSTYRENO2 (LIN)

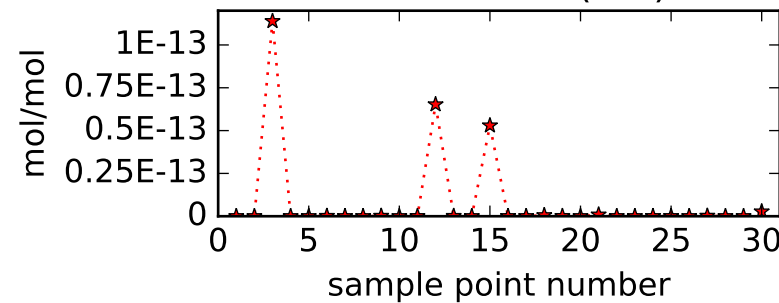

NSTYRENO2 (LOG)

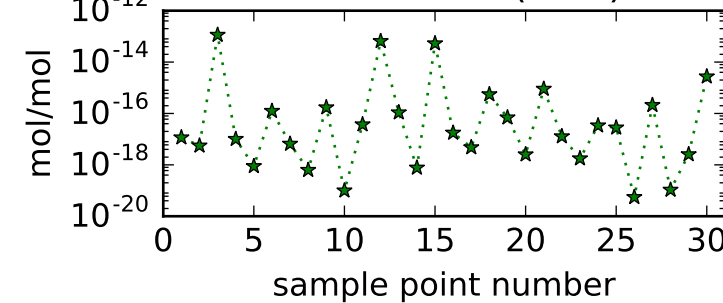

NSTYRENOOH (LIN)

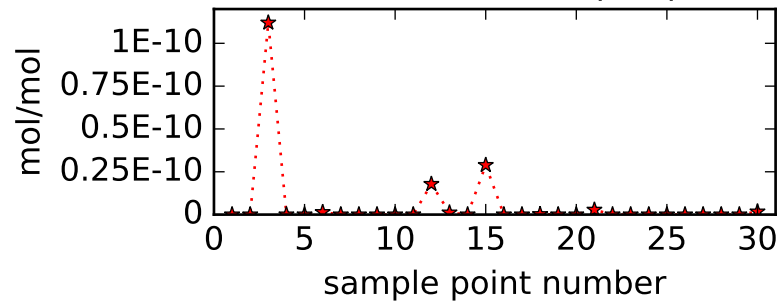

NSTYRENOOH (LOG)

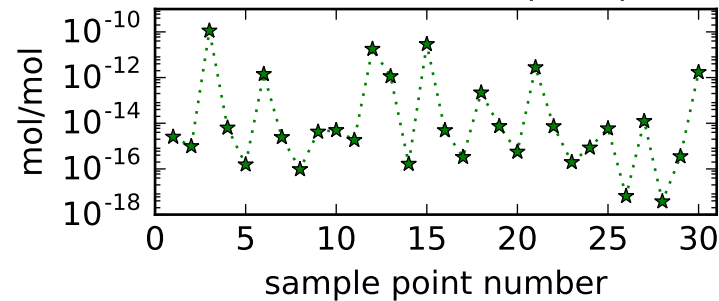

NTLFUO2 (LIN)

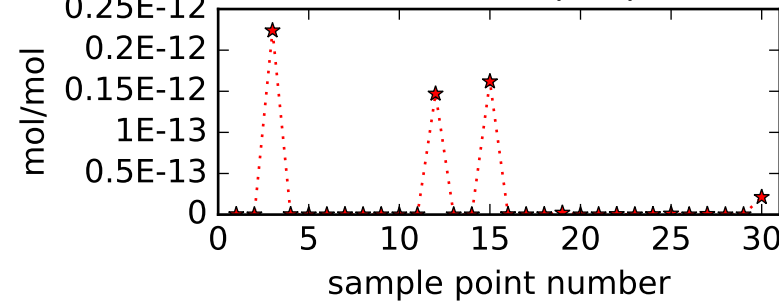

NTLFUO2 (LOG)

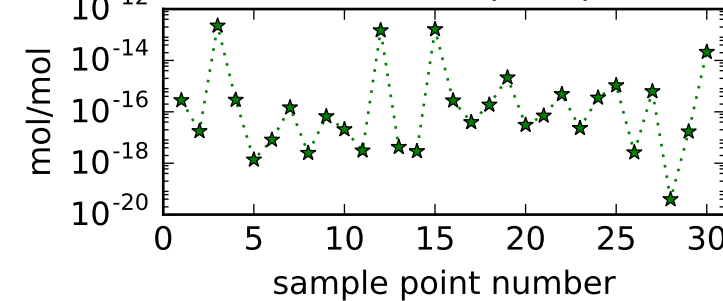

NTLFUOOH (LIN)

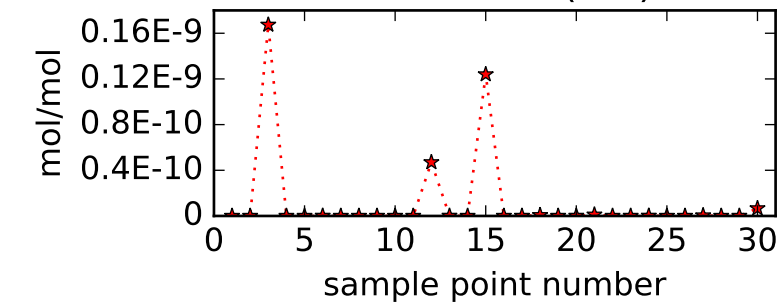

NTLFUOOH (LOG)

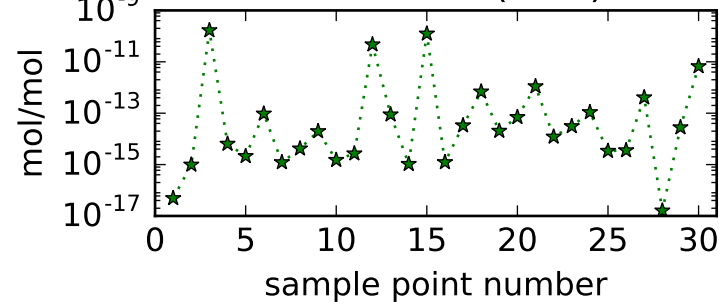

O1D (LIN)

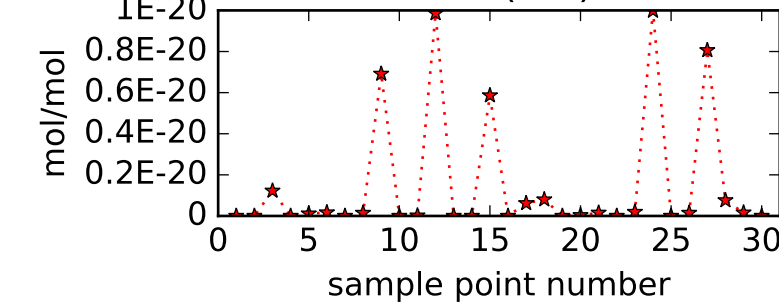

O1D (LOG)

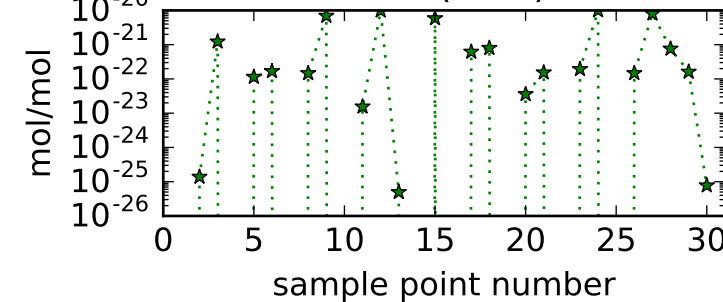

O2 (LIN)

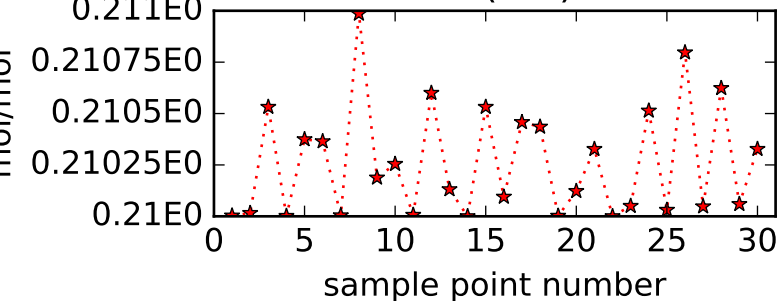

O2 (LOG)

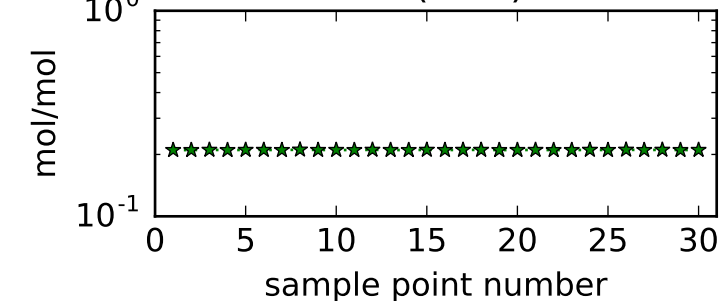

O3 (LIN)

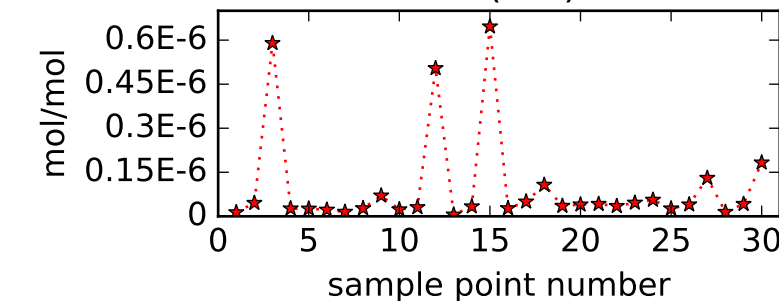

O3 (LOG)

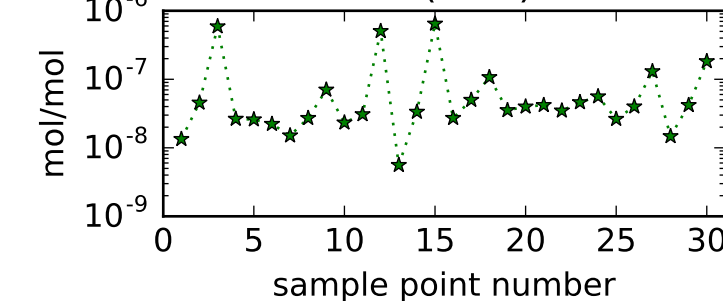

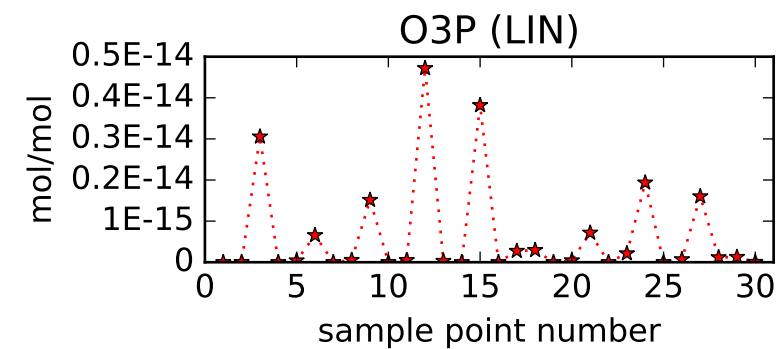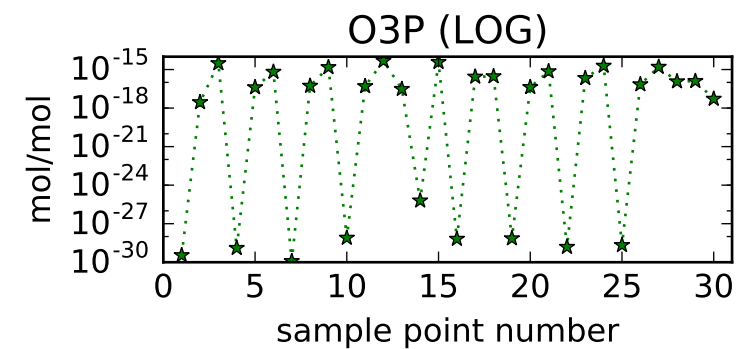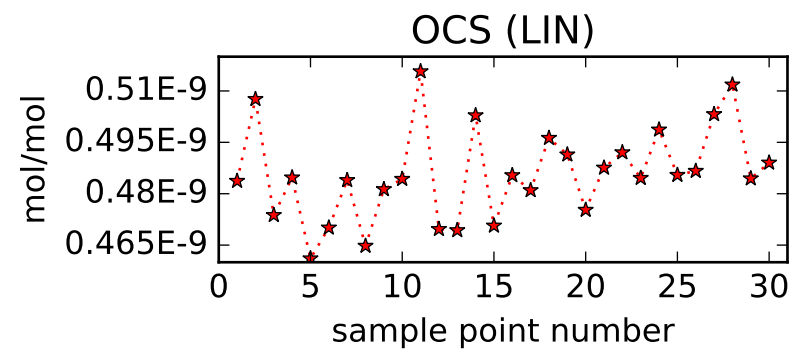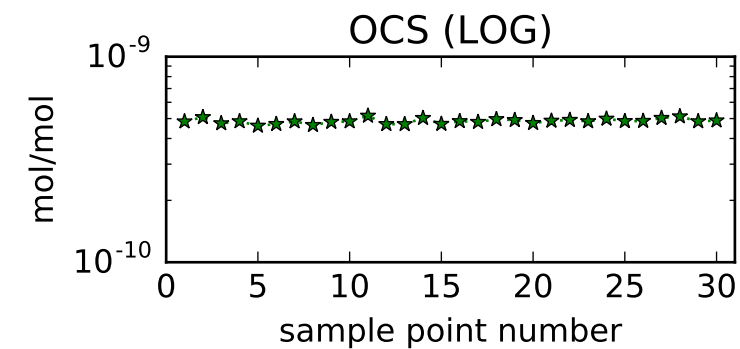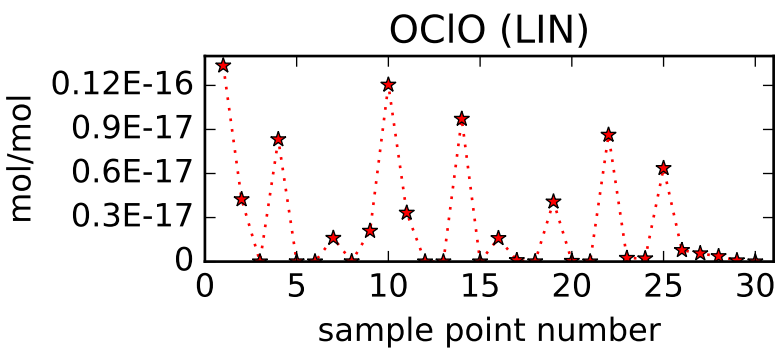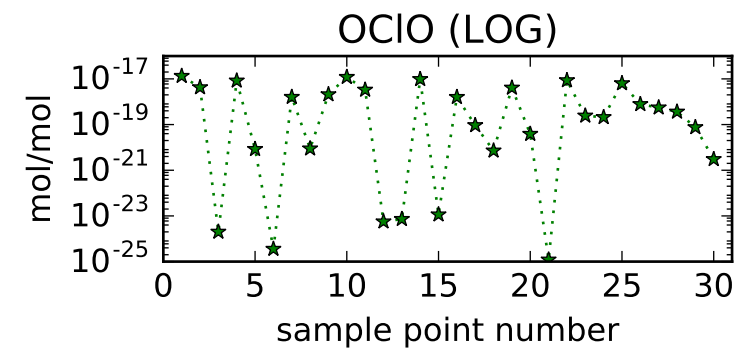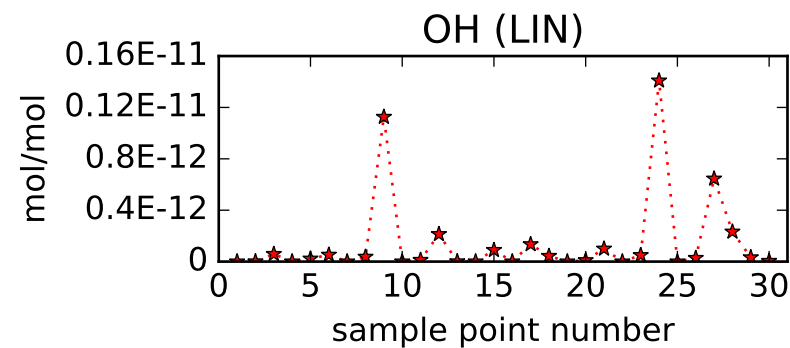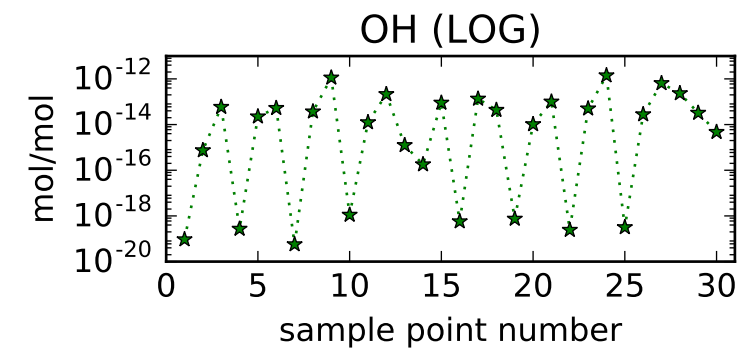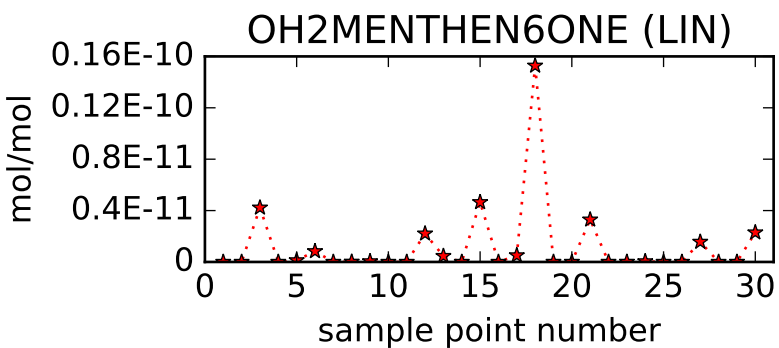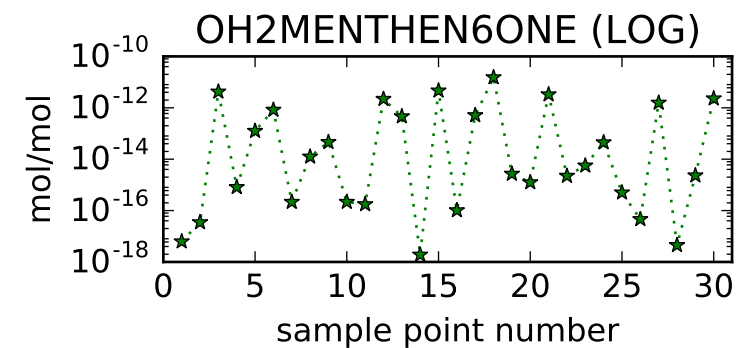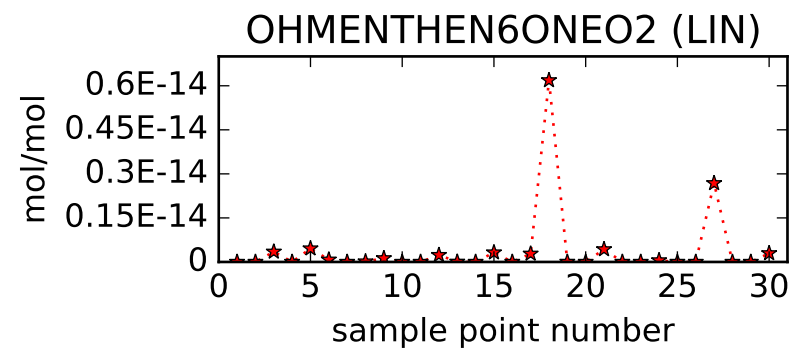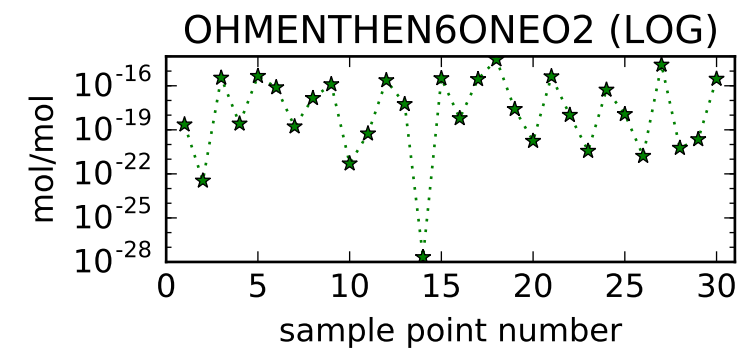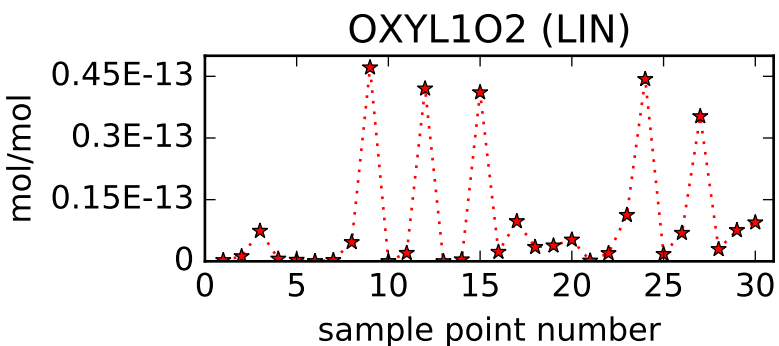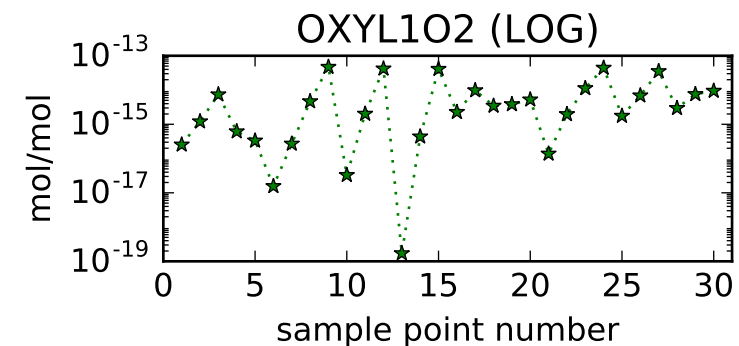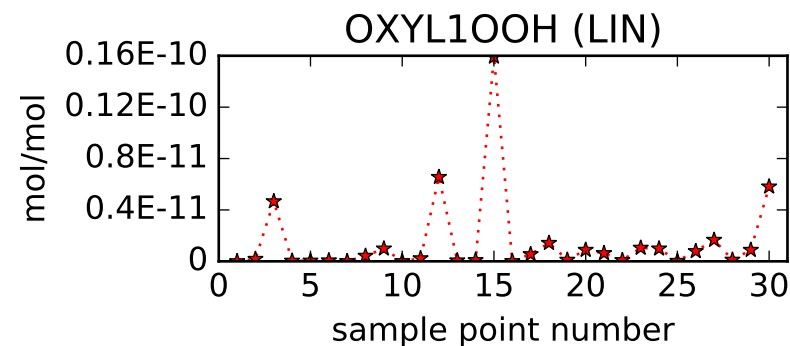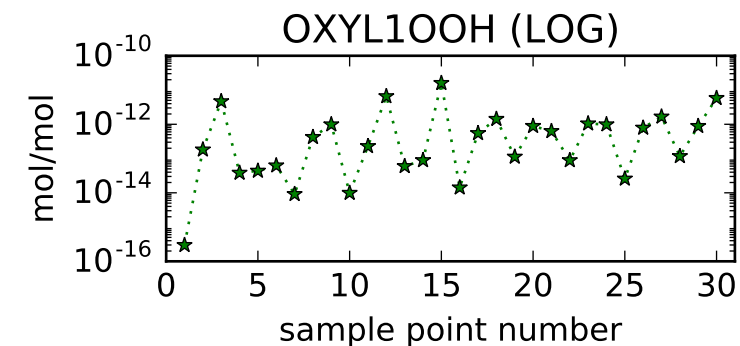

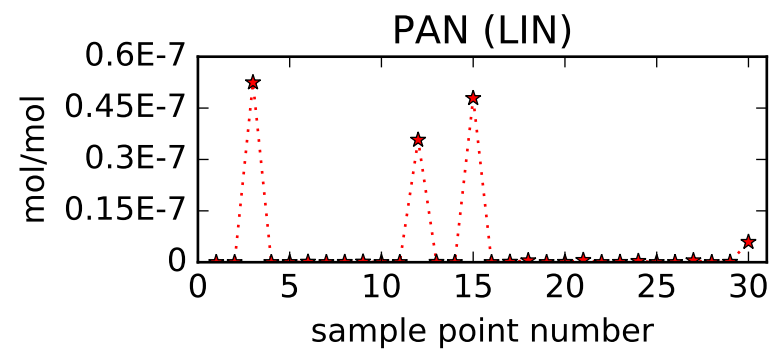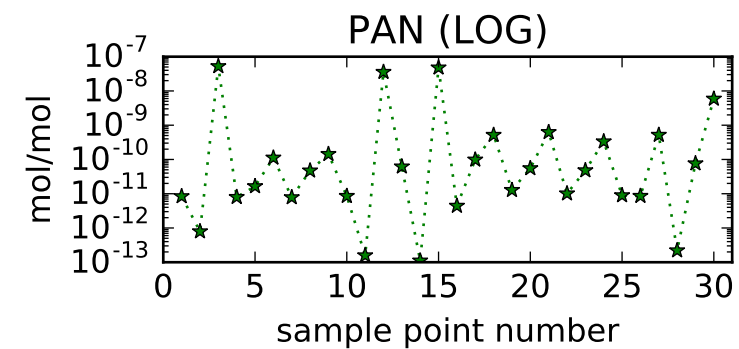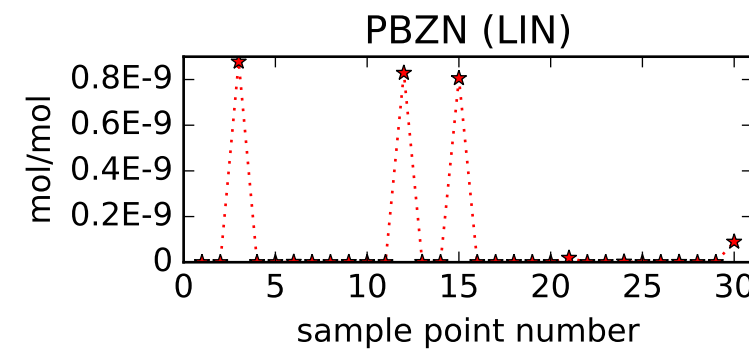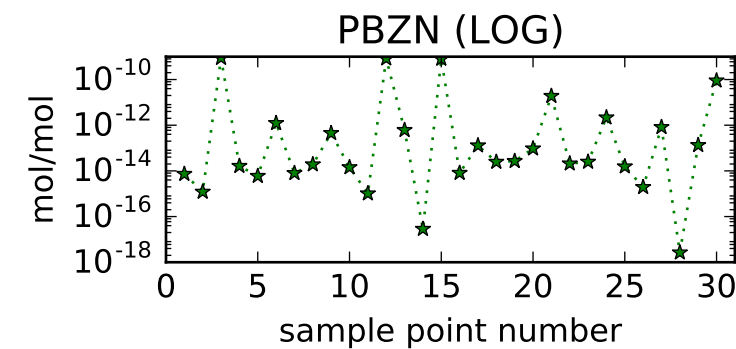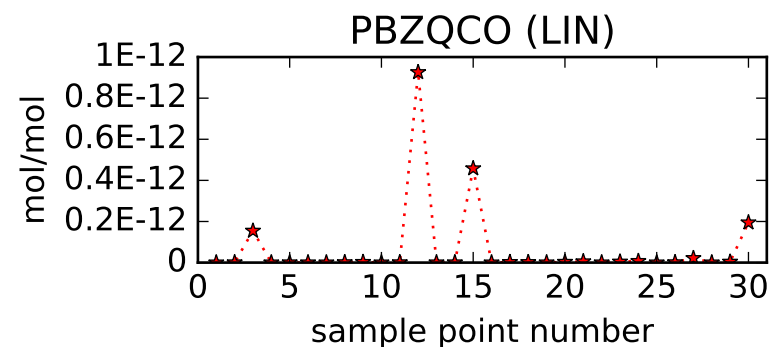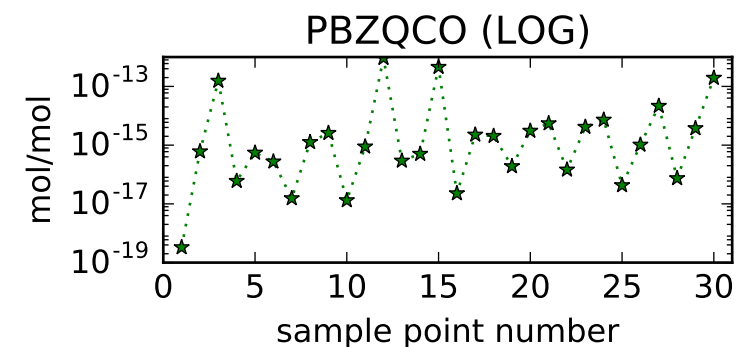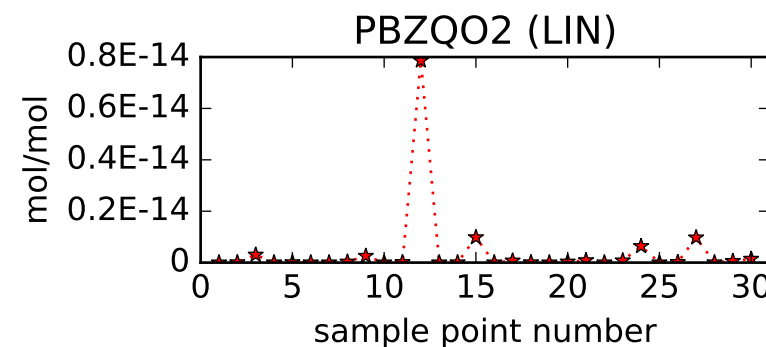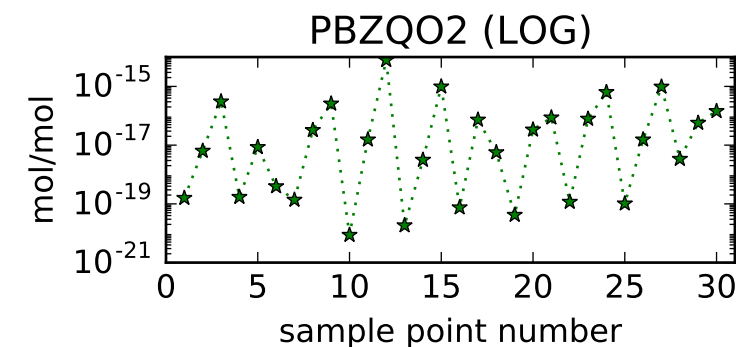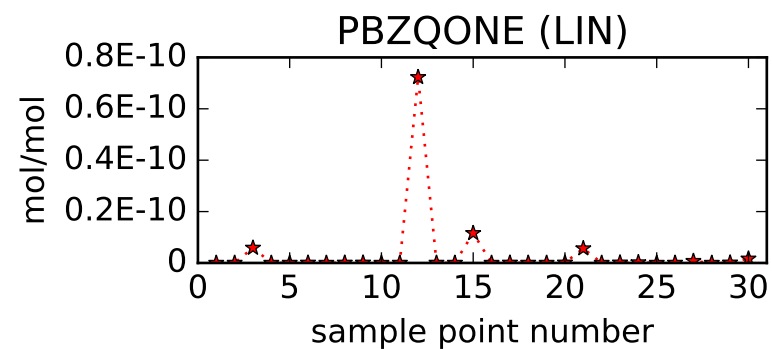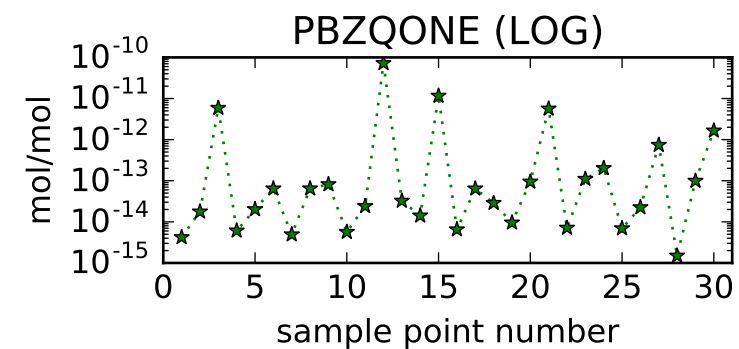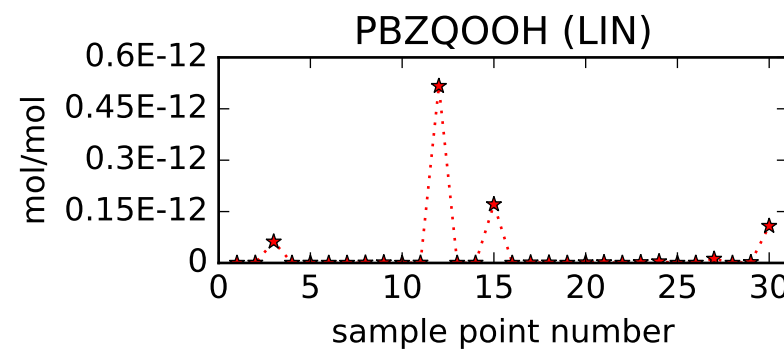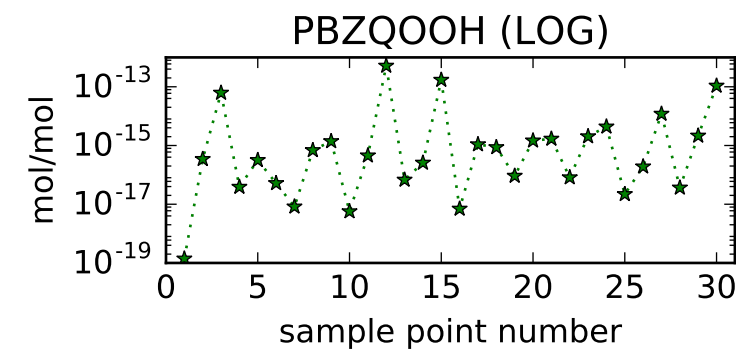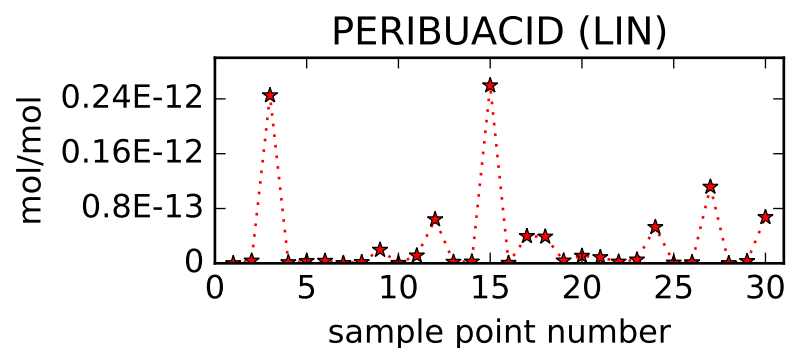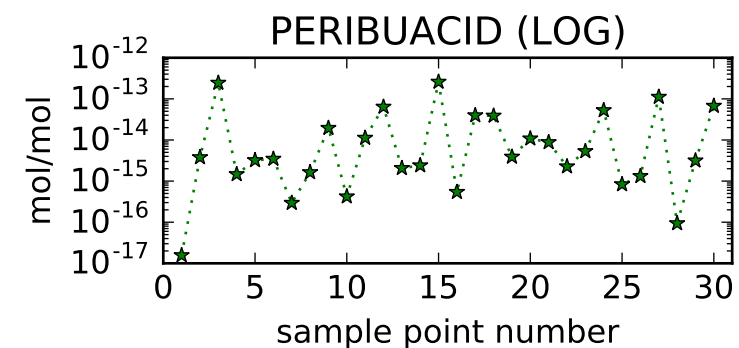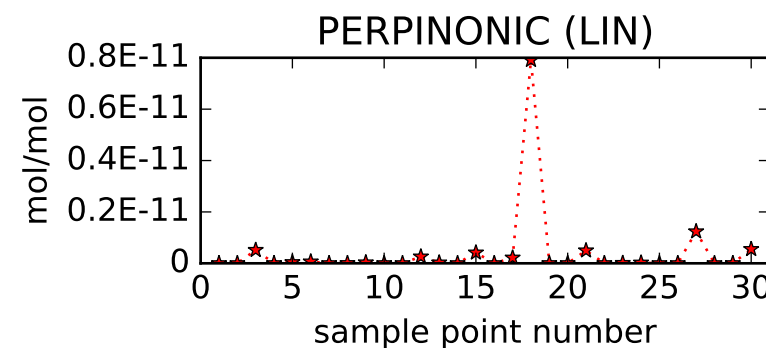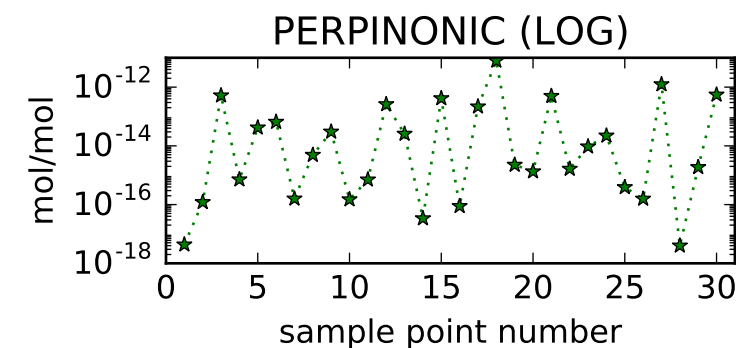

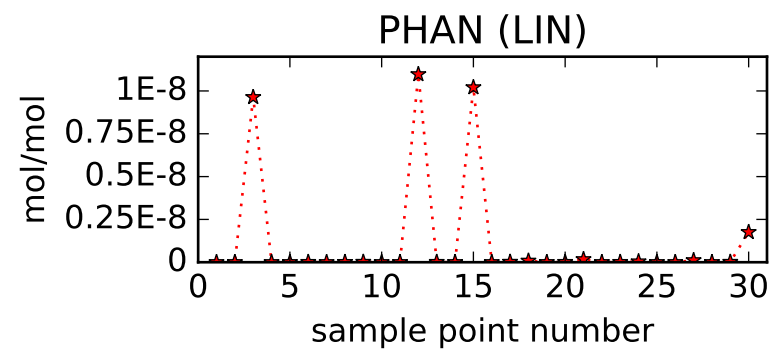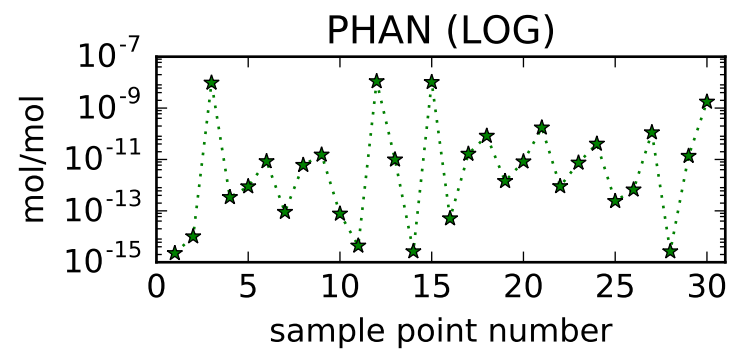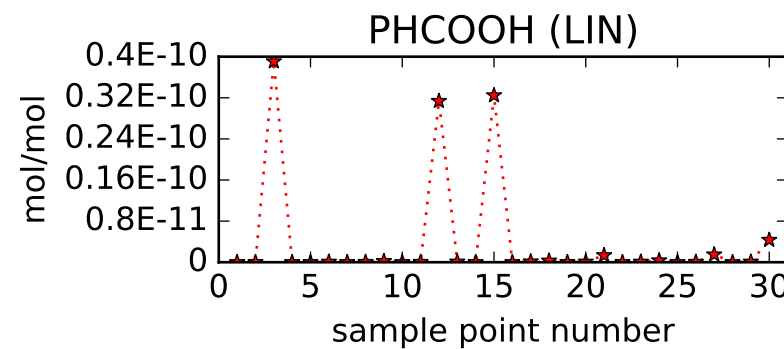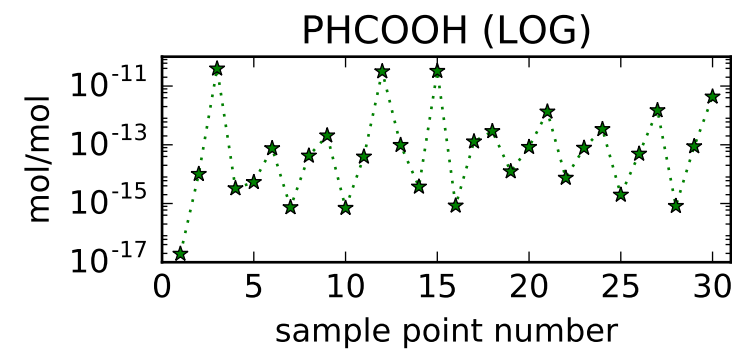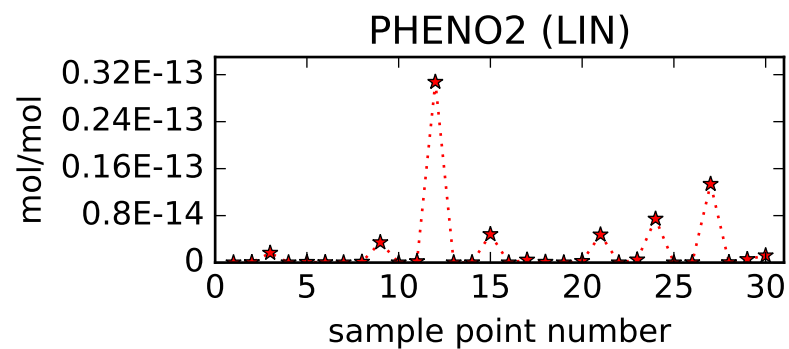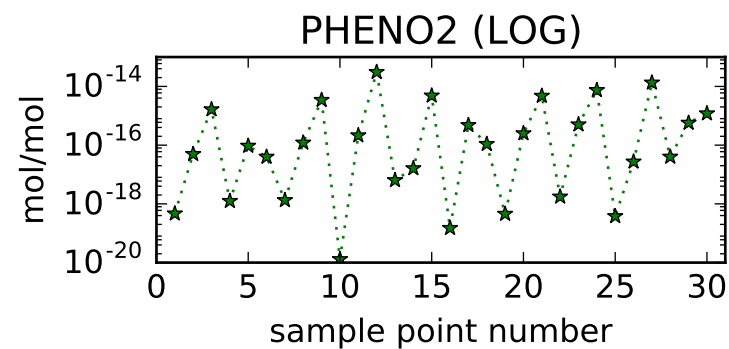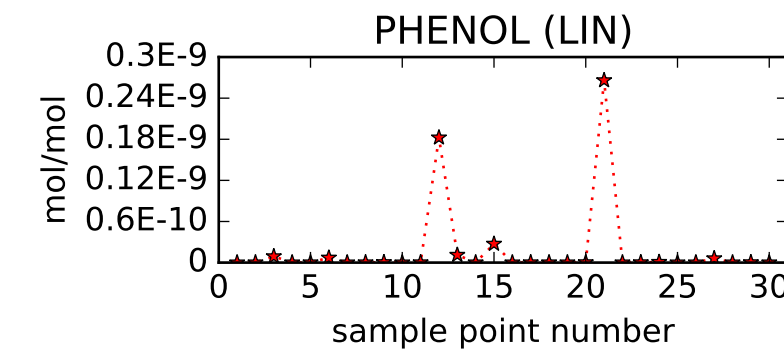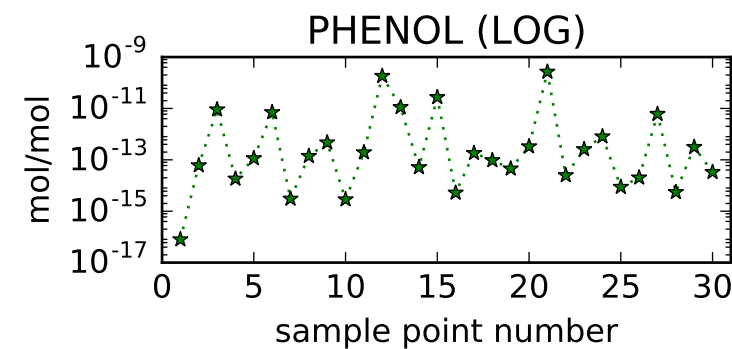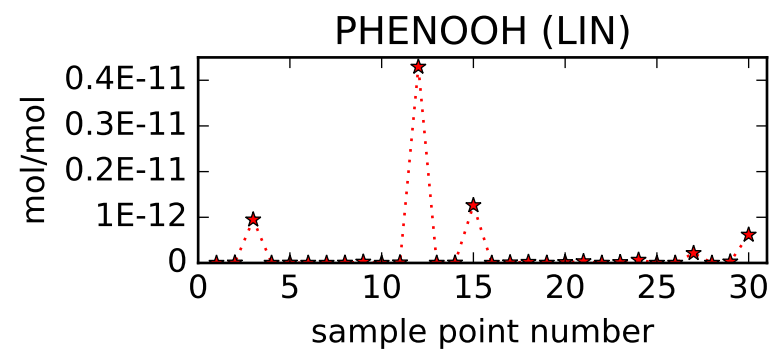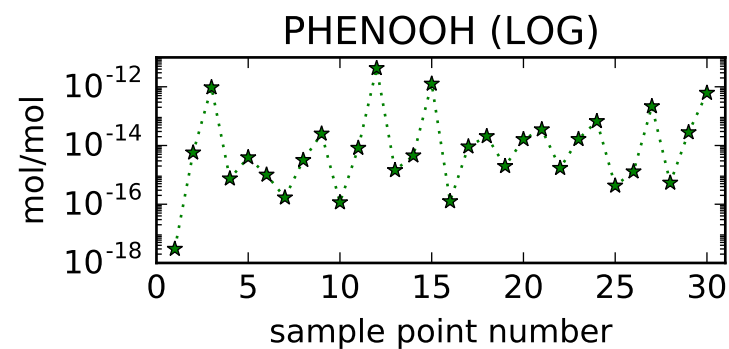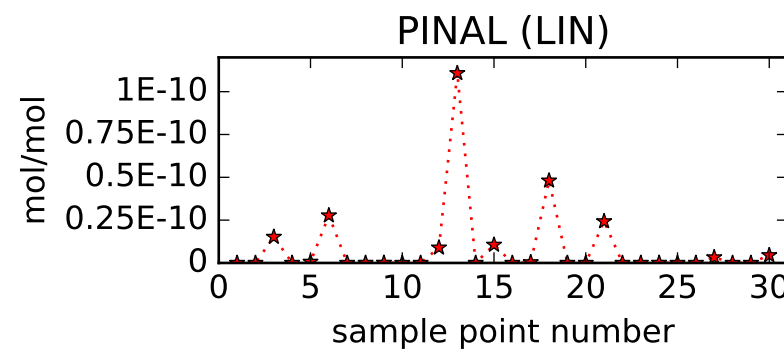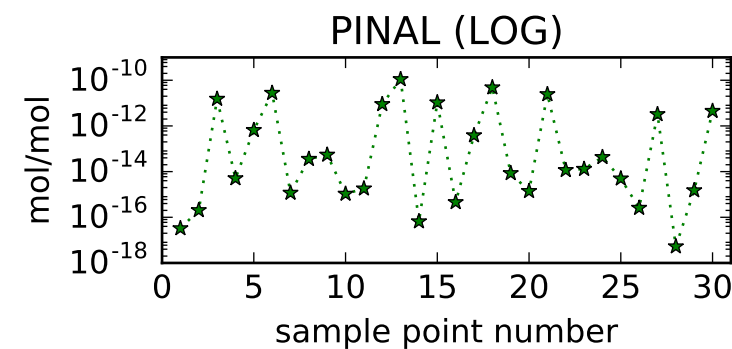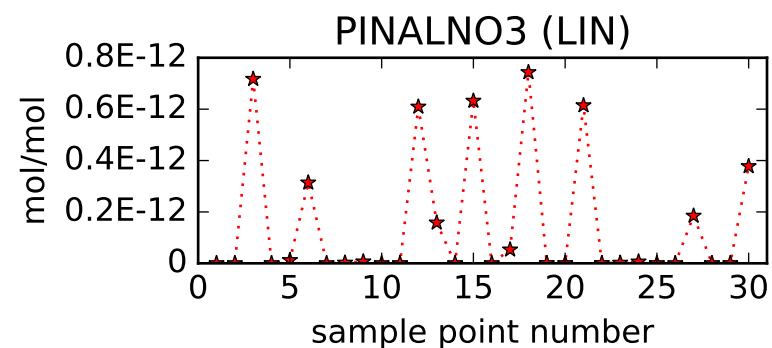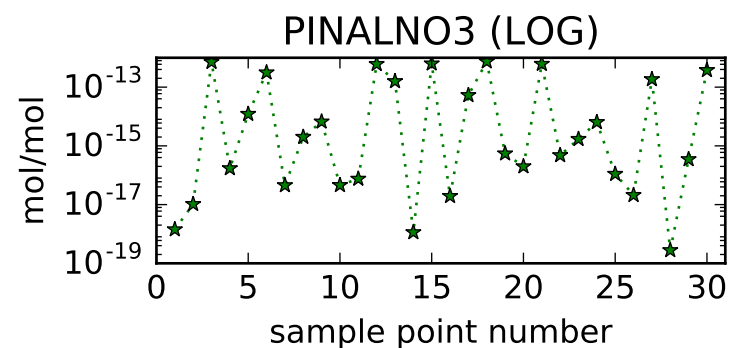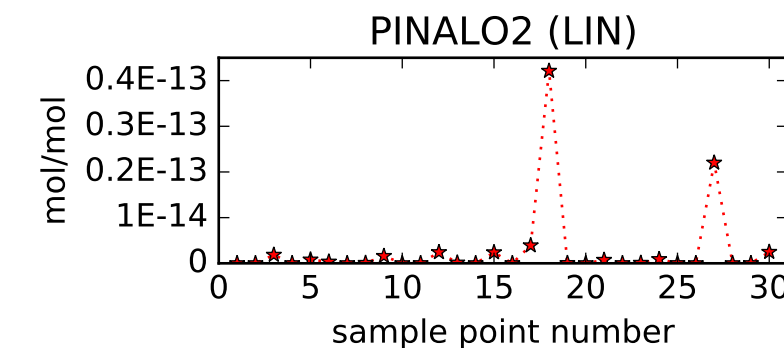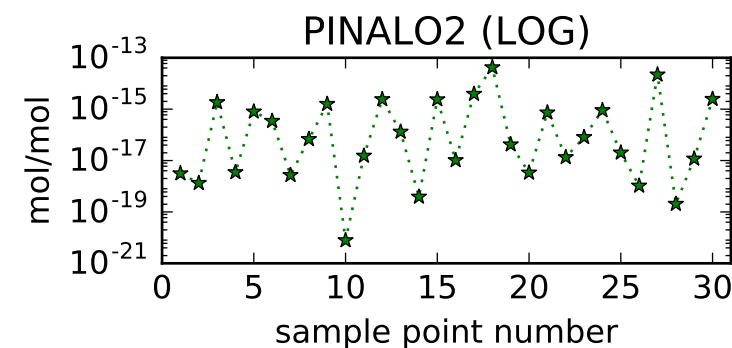

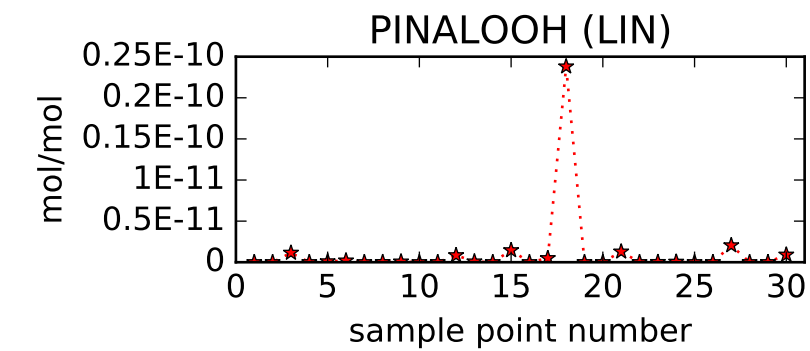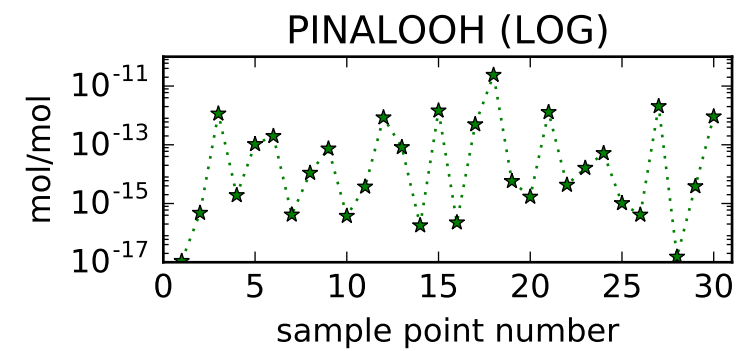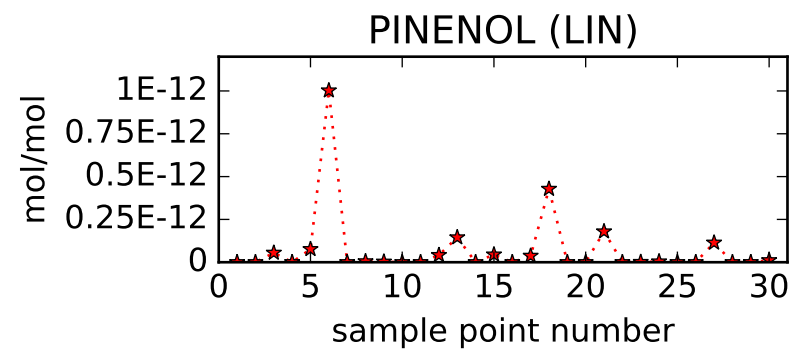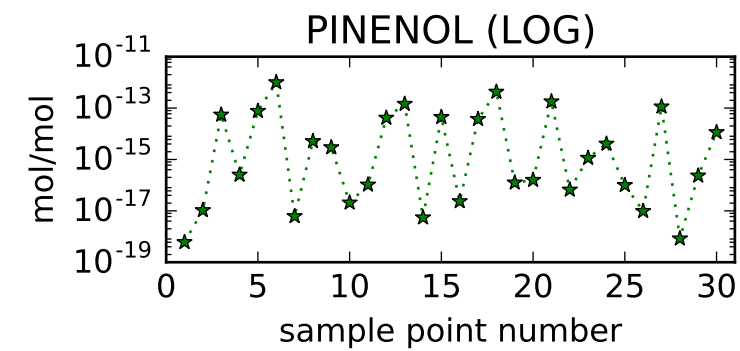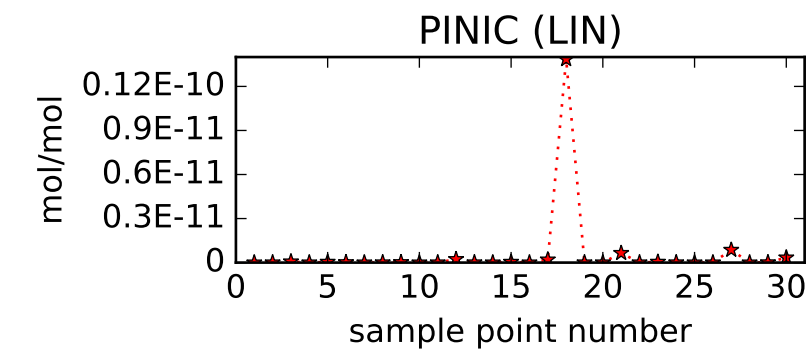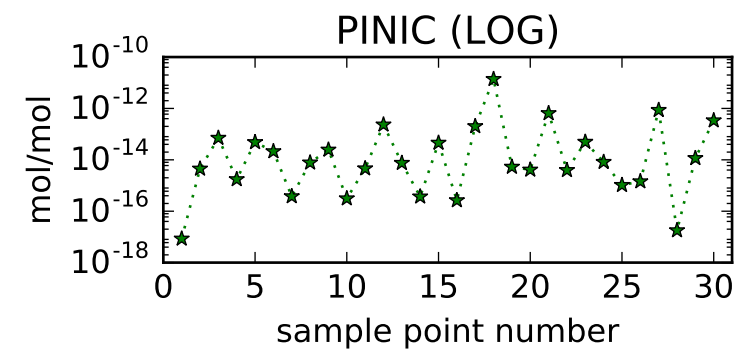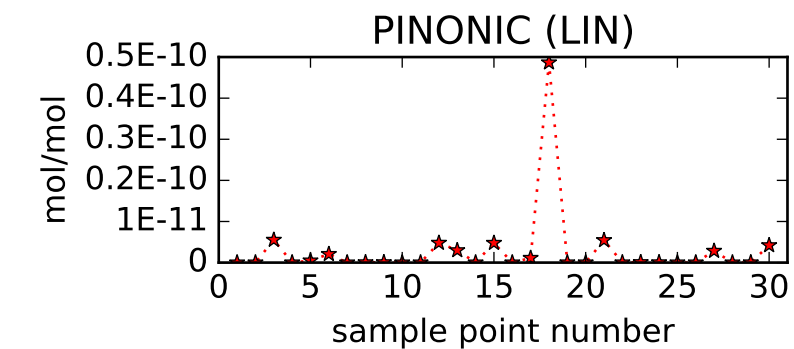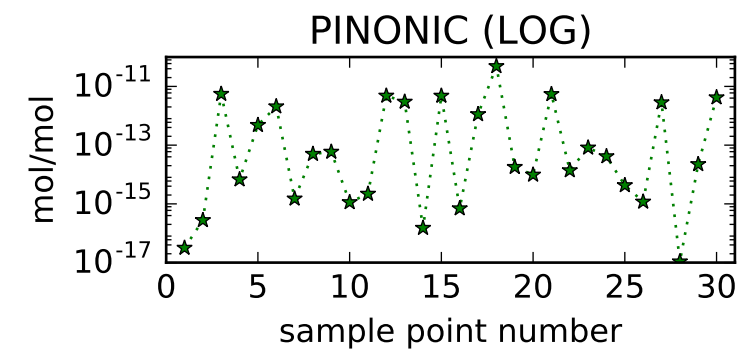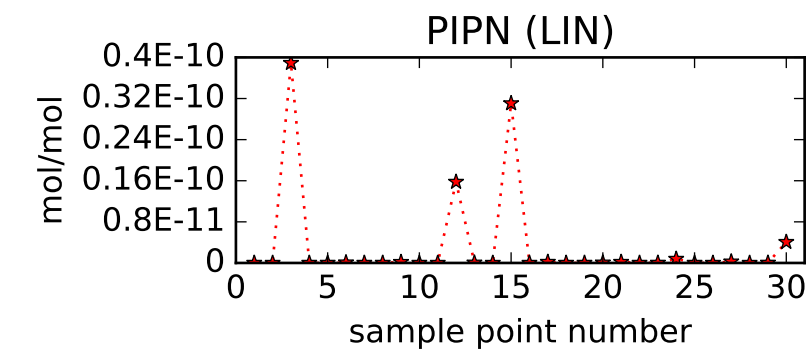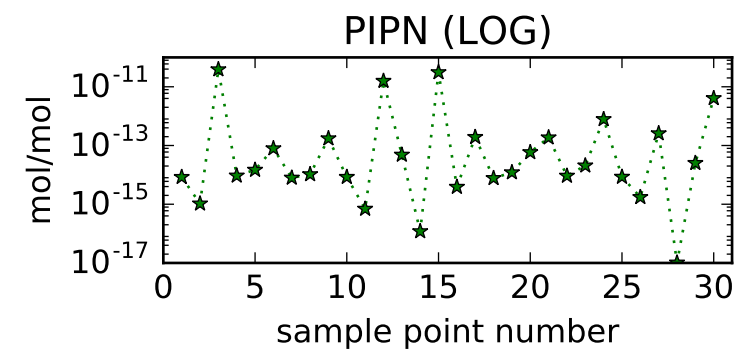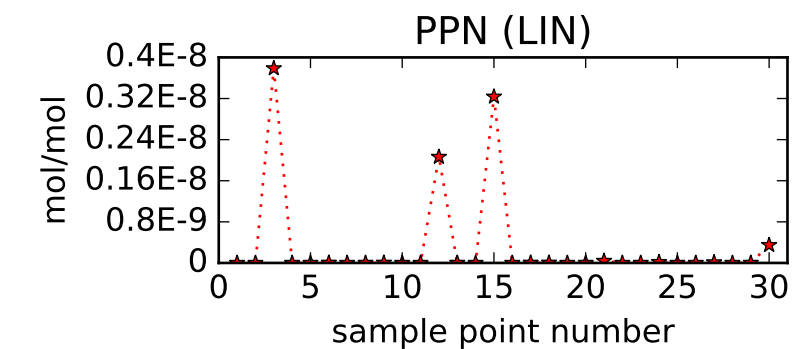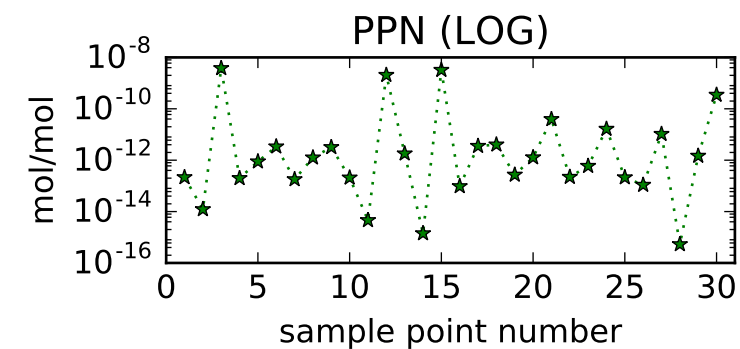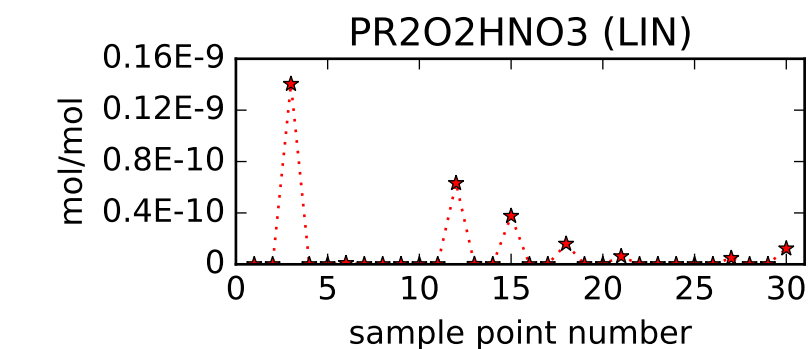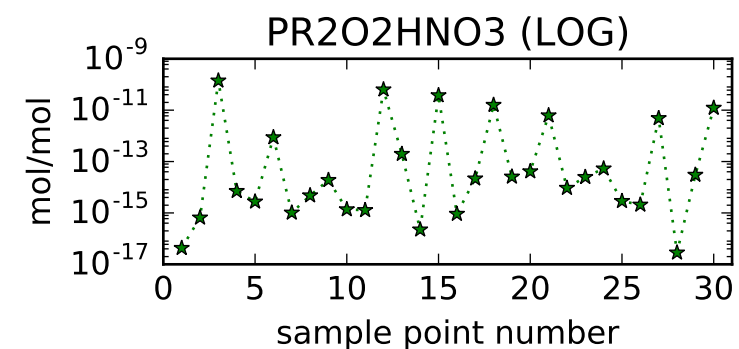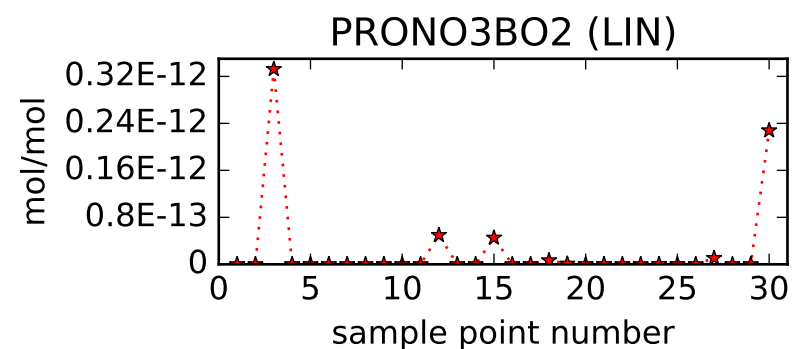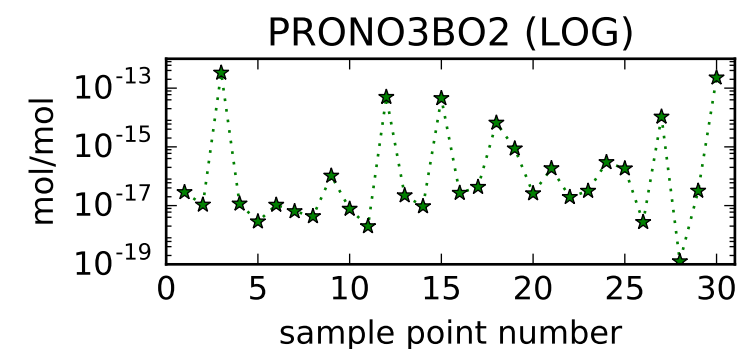



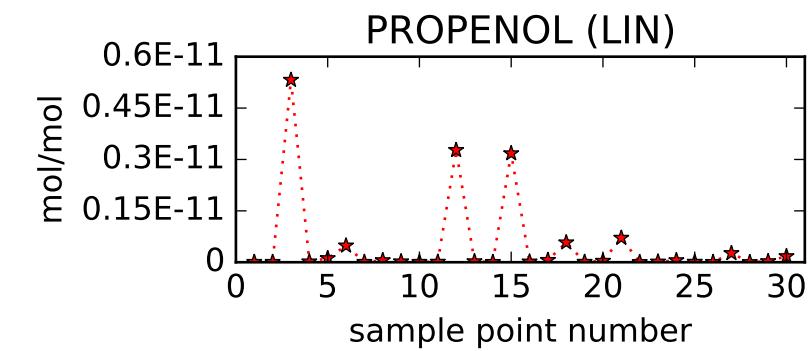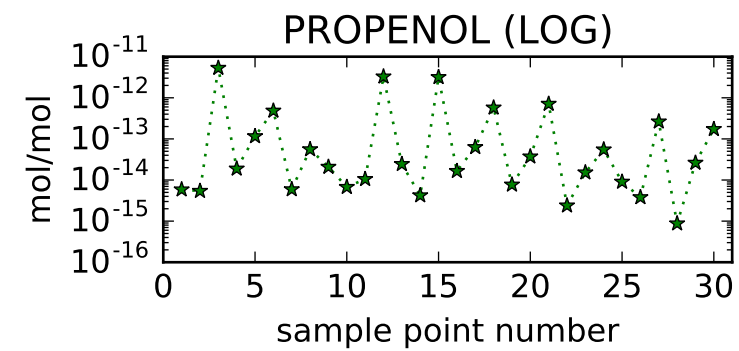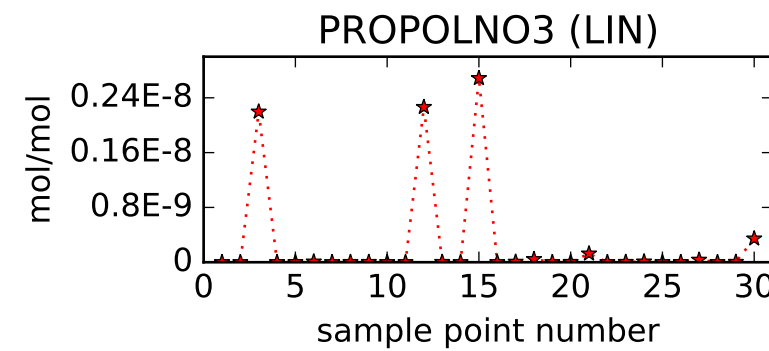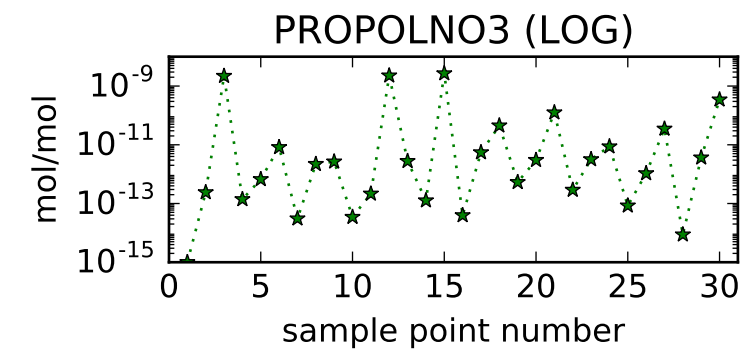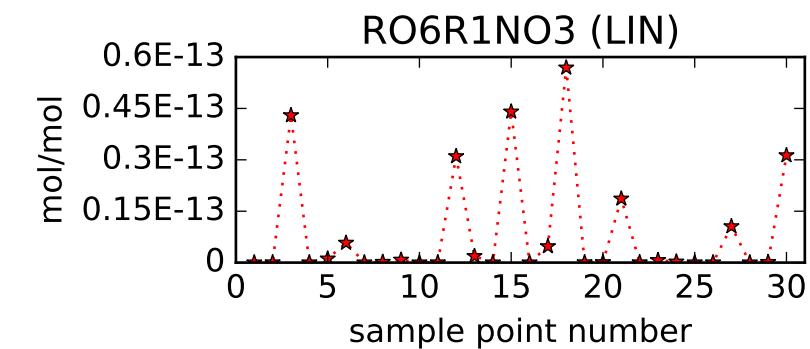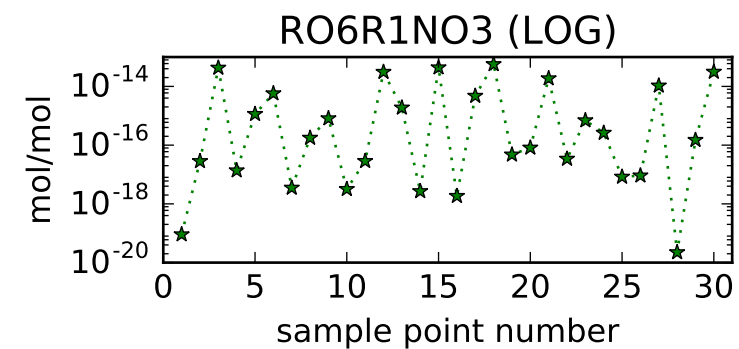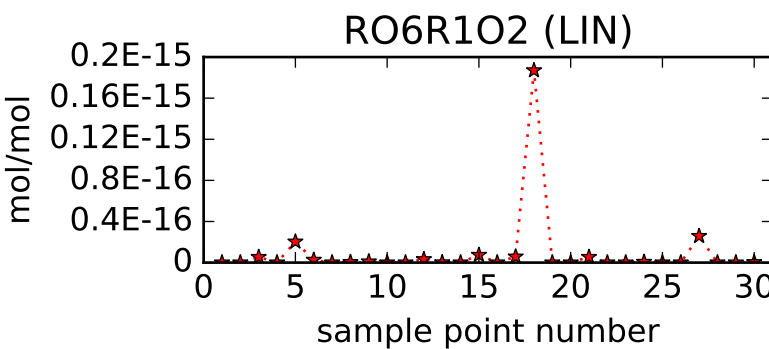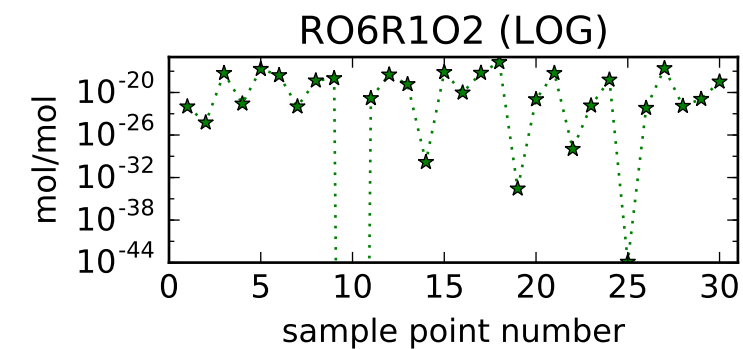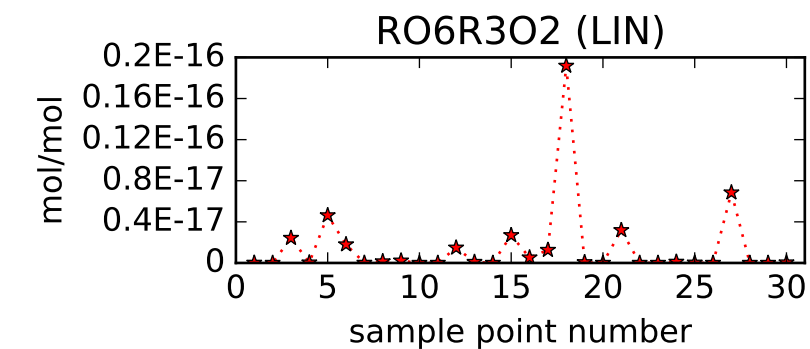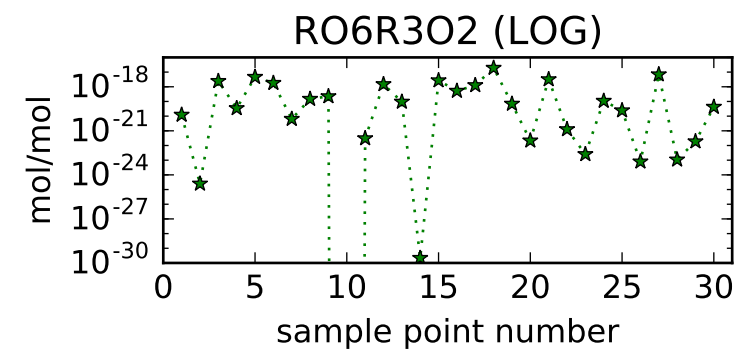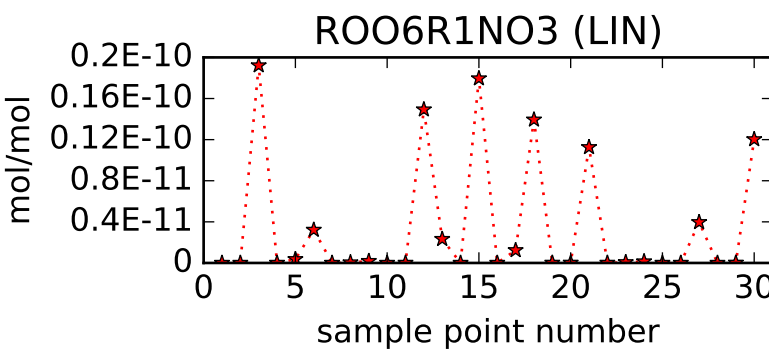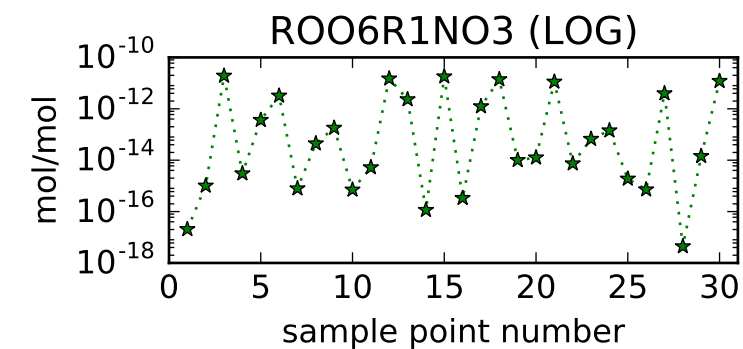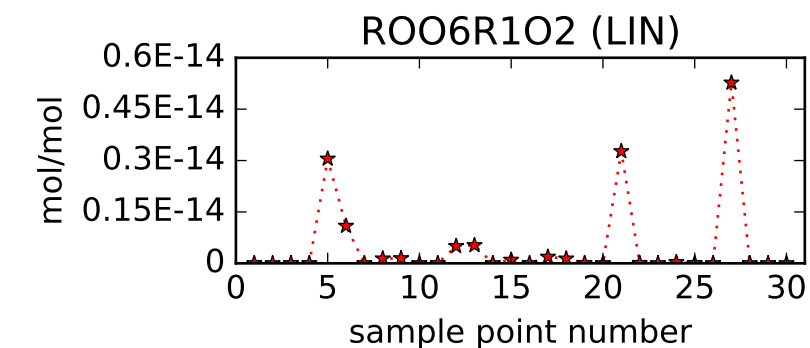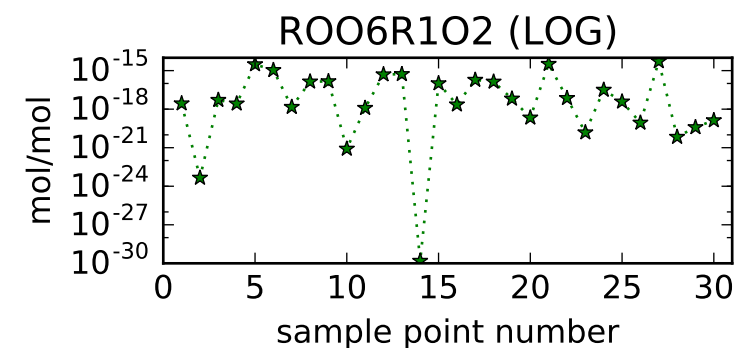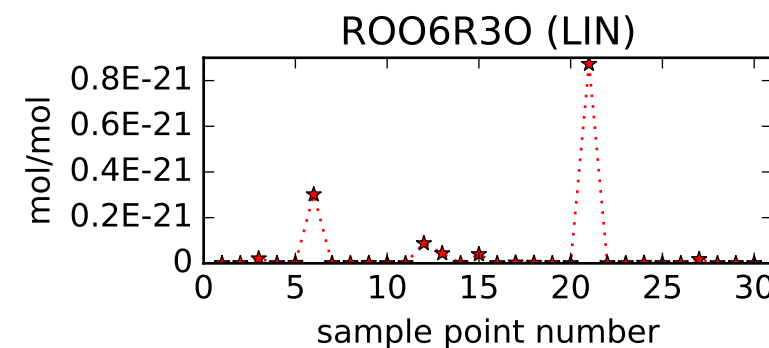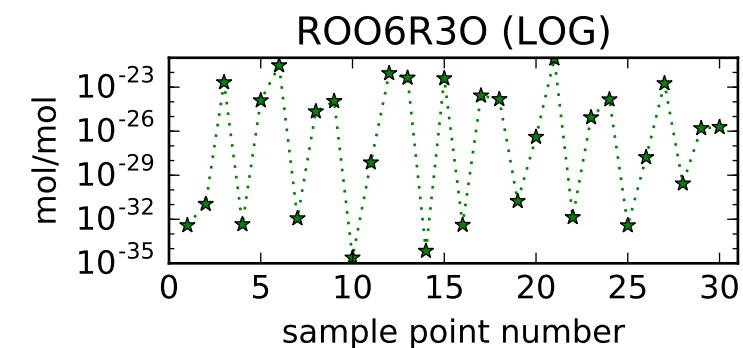

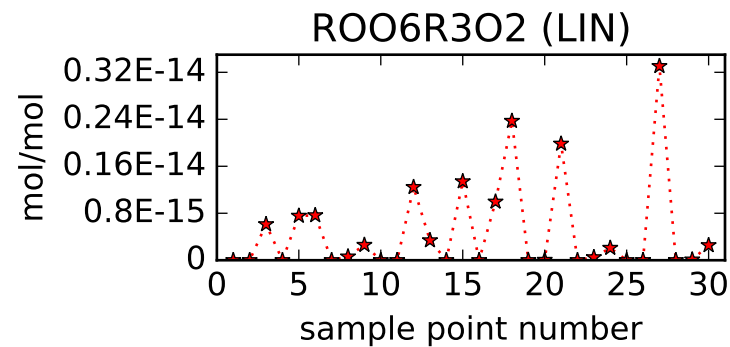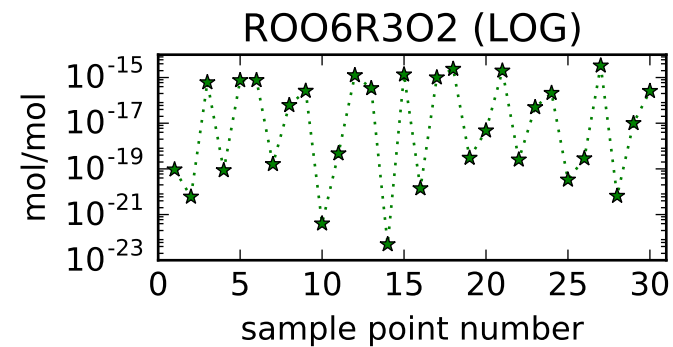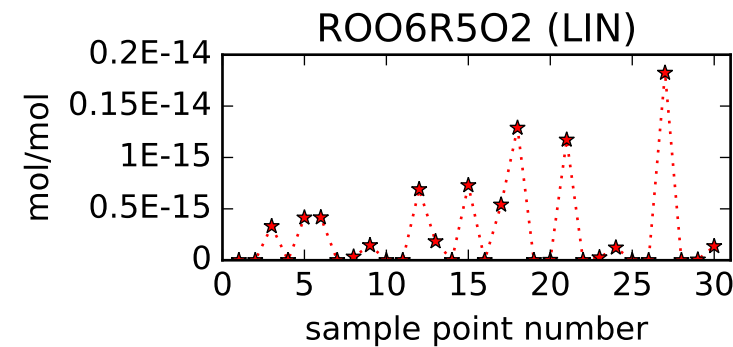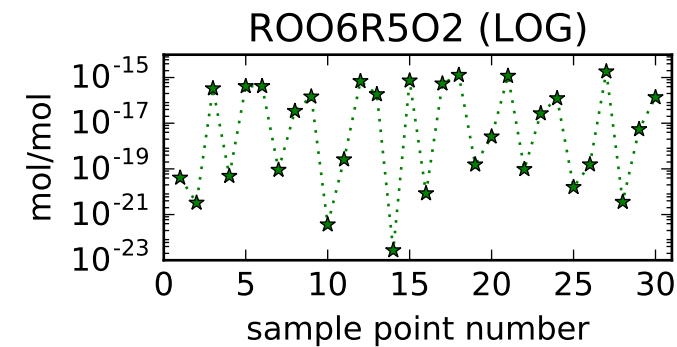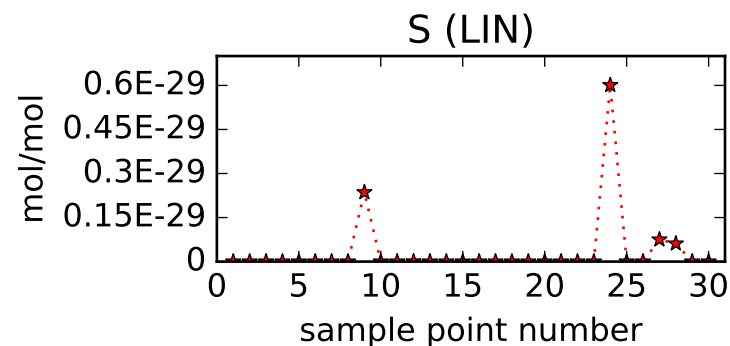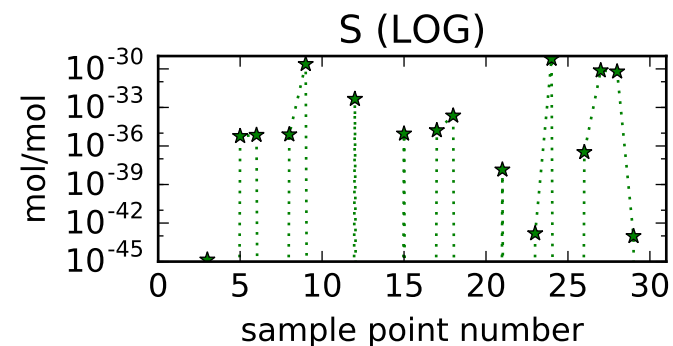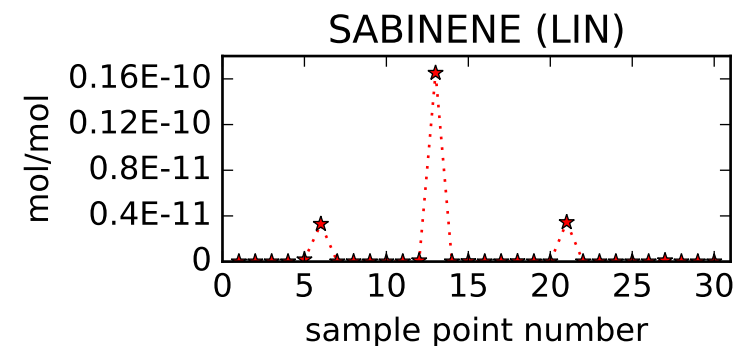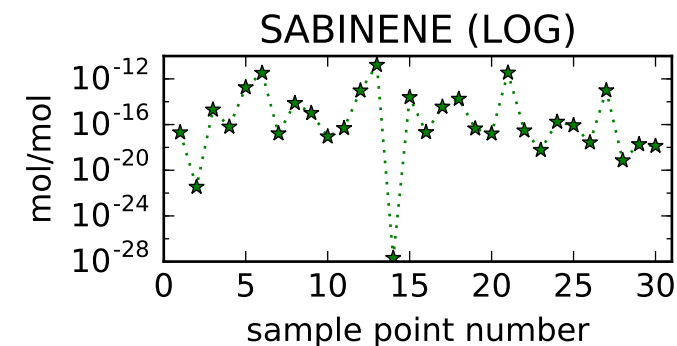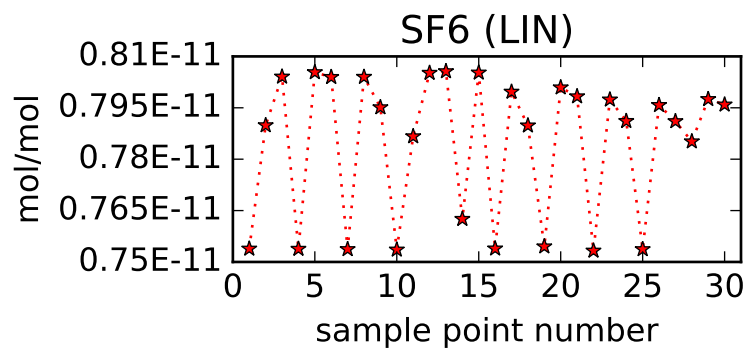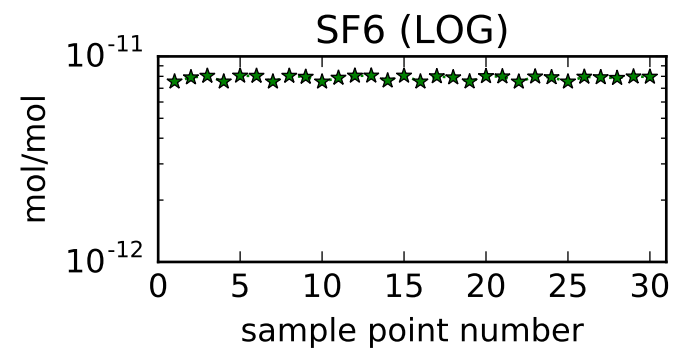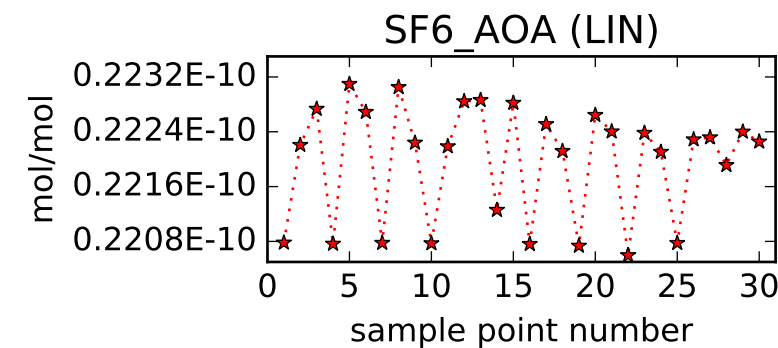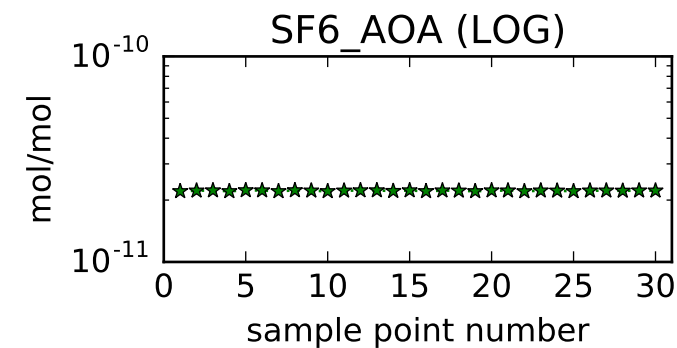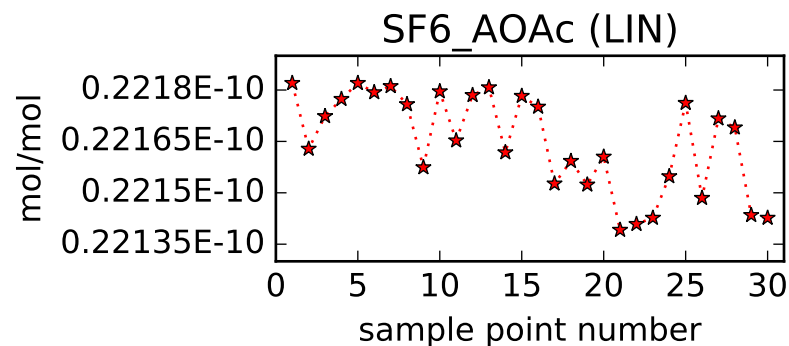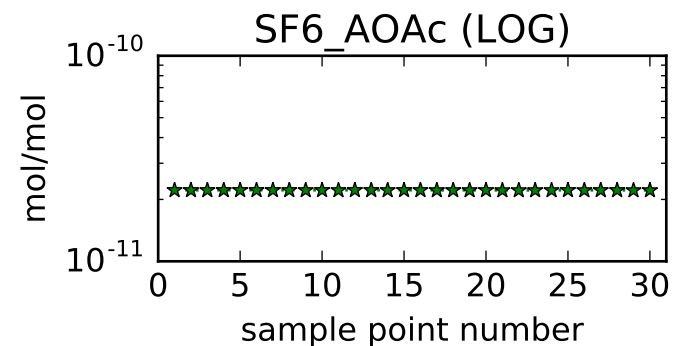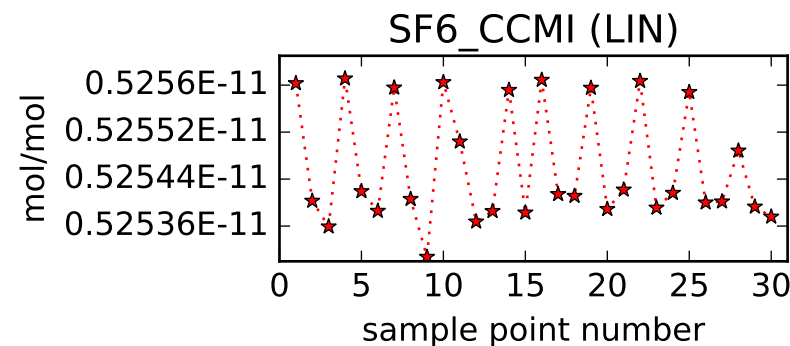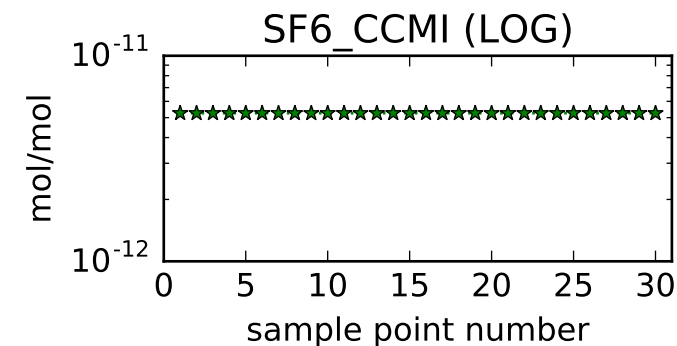

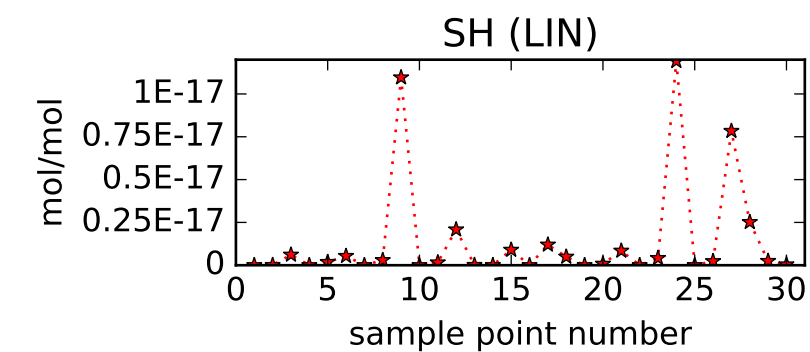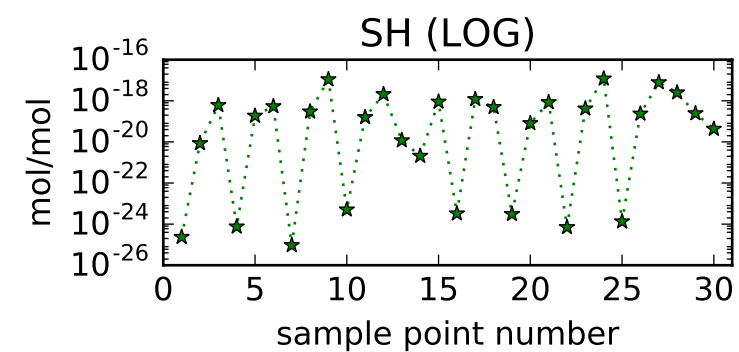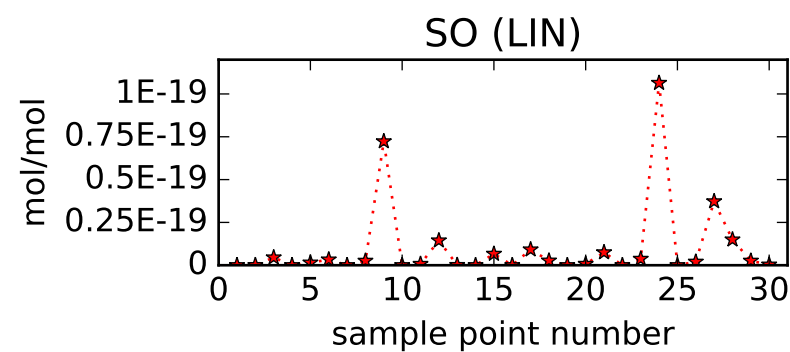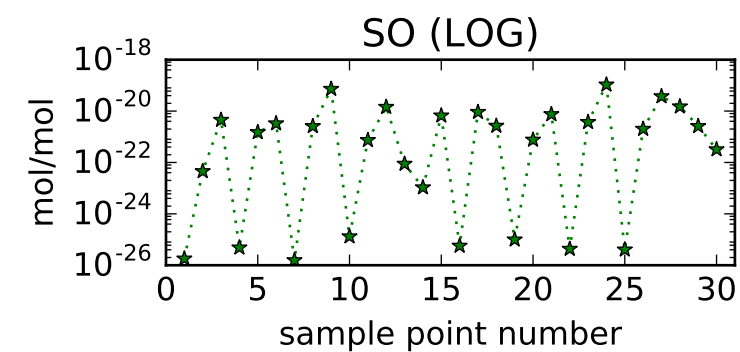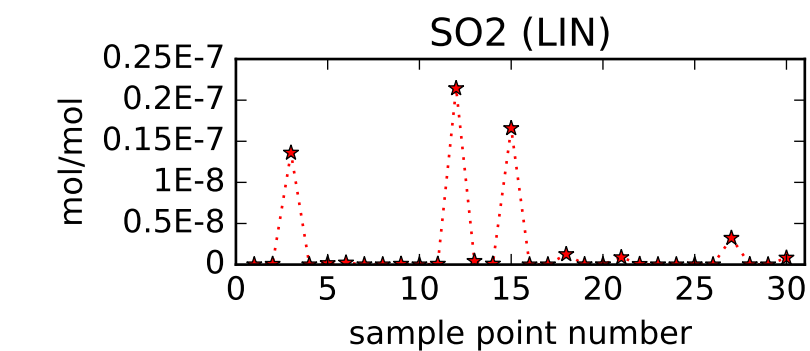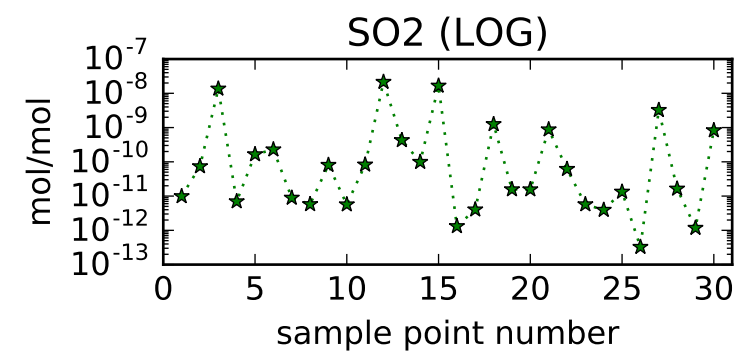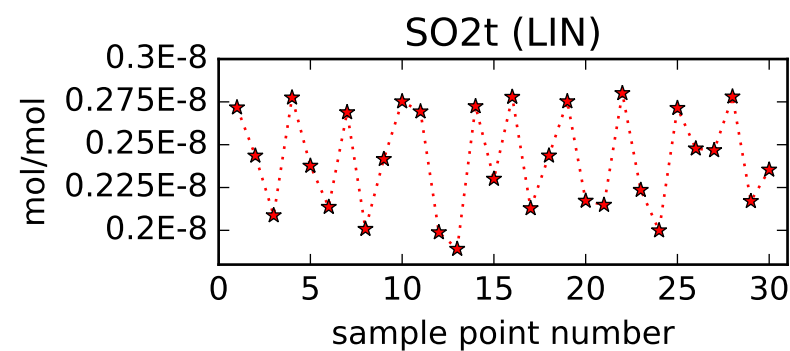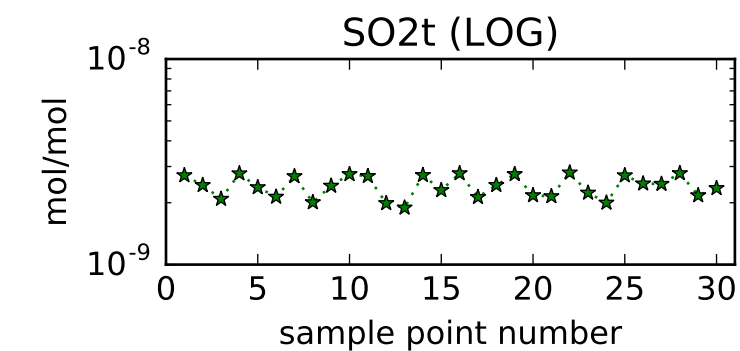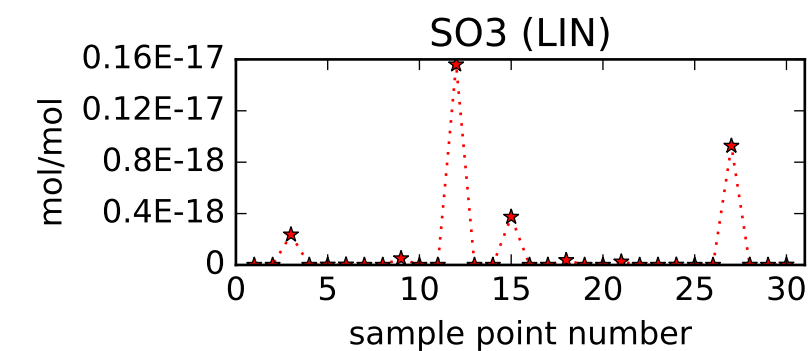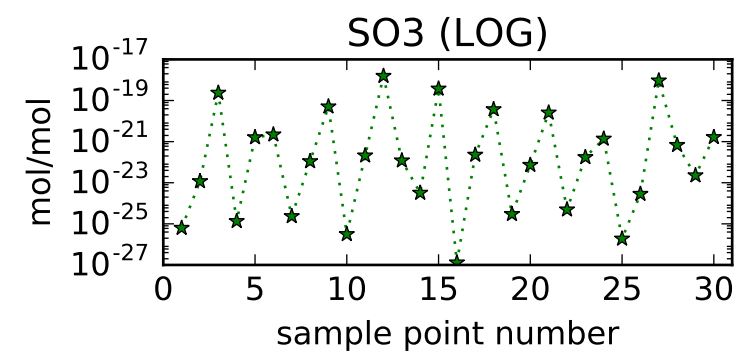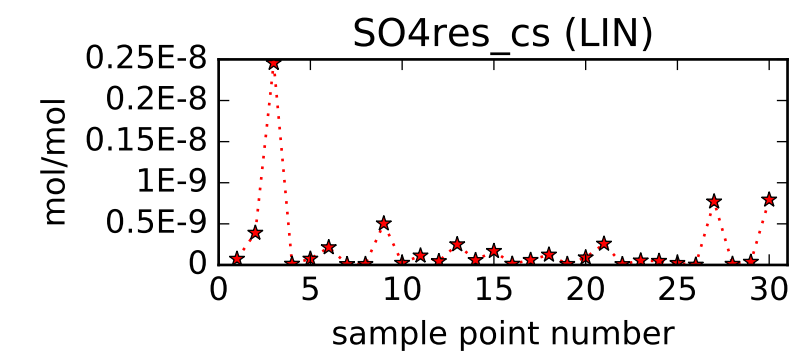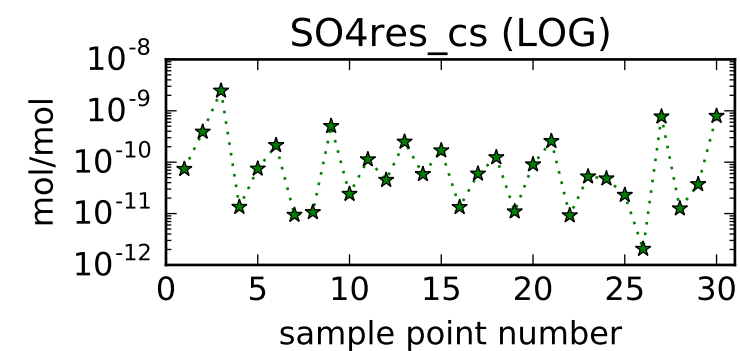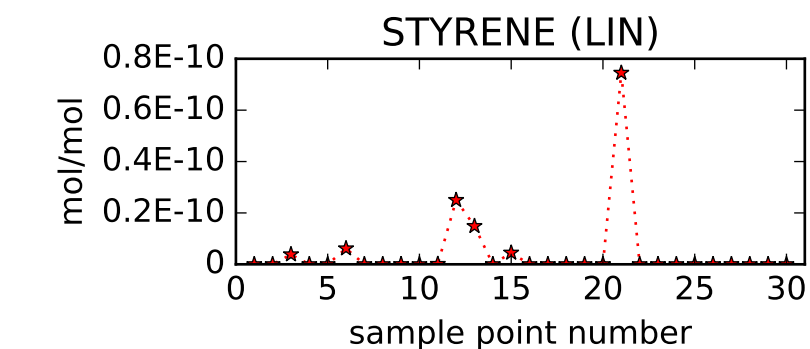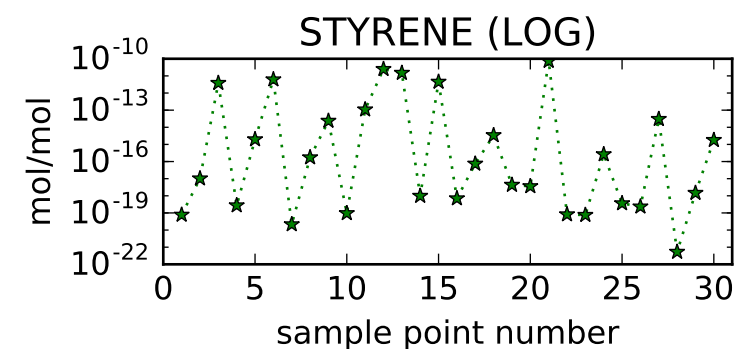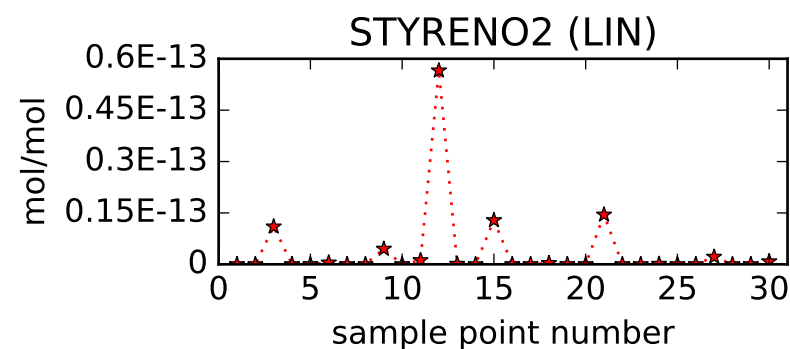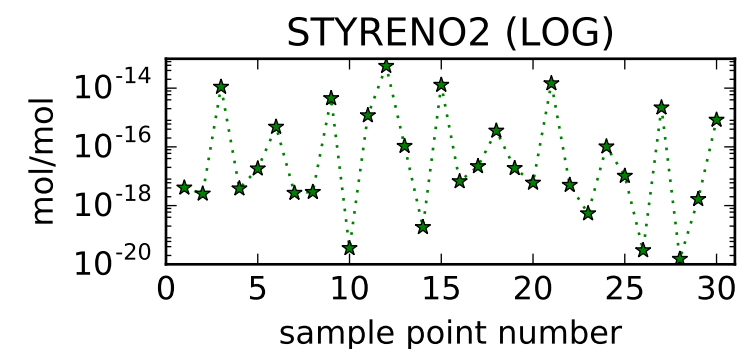

STYRENOOH (LIN)

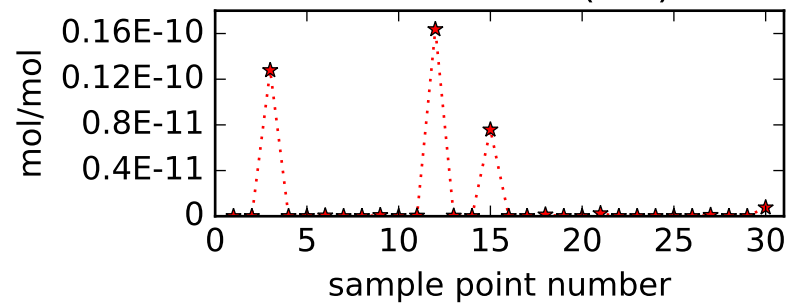

STYRENOOH (LOG)

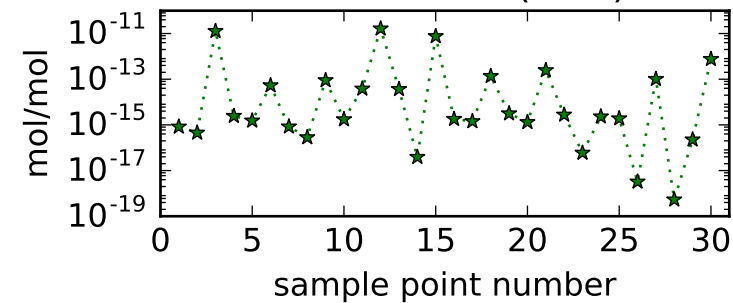

TBUT2ENE (LIN)

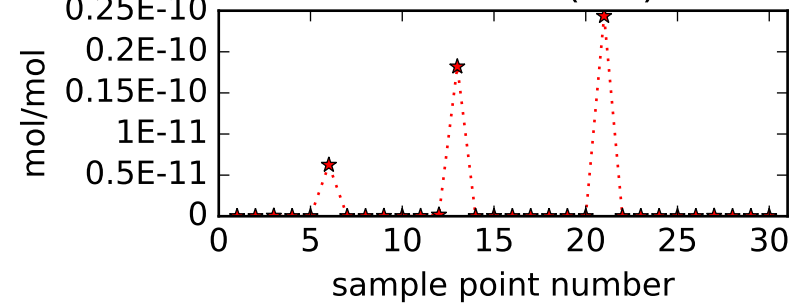

TBUT2ENE (LOG)

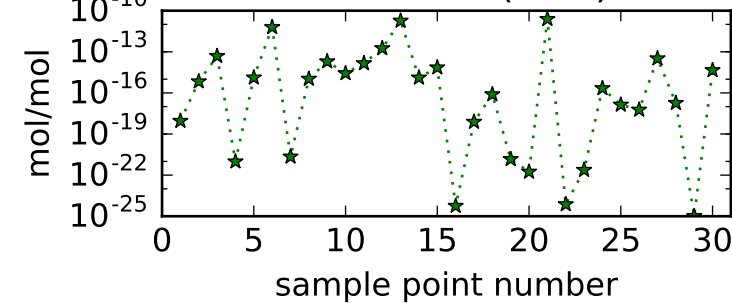

TC4H9NO3 (LIN)

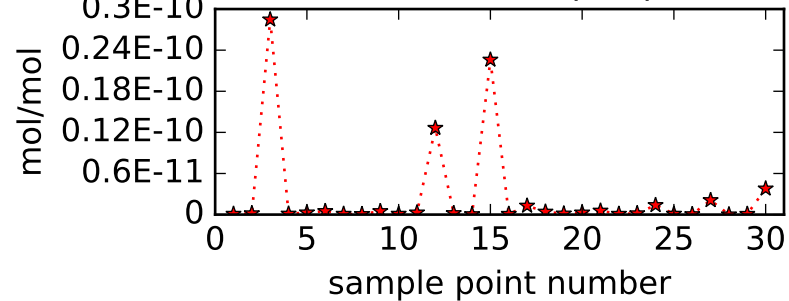

TC4H9NO3 (LOG)

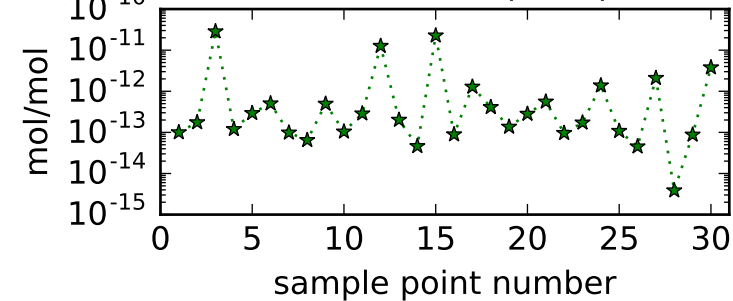

TC4H9O2 (LIN)

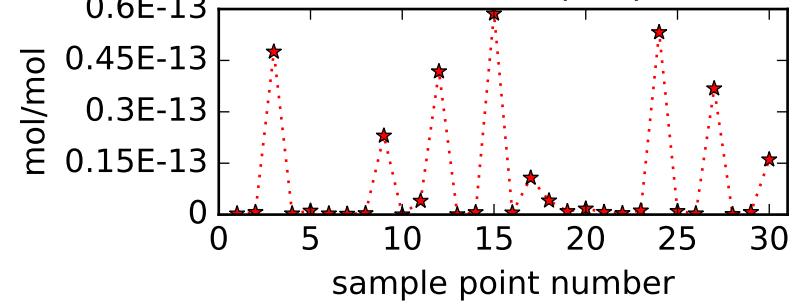

TC4H9O2 (LOG)

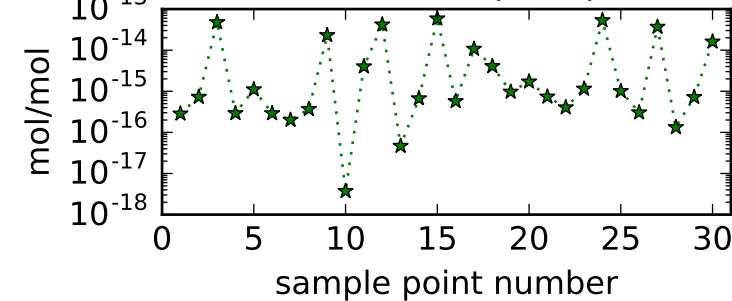

TC4H9OOH (LIN)

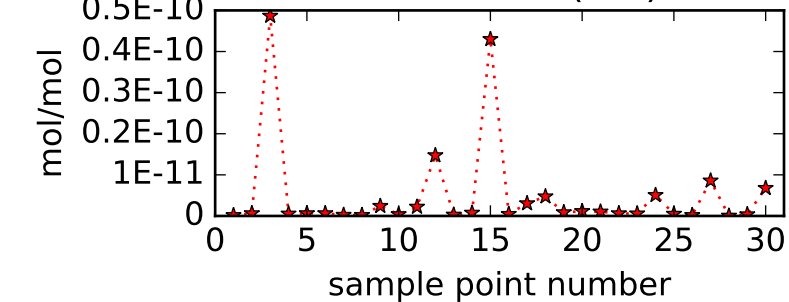

TC4H9OOH (LOG)

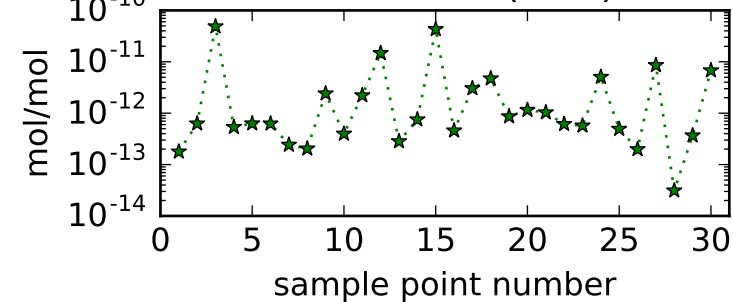

TLBIPERNO3 (LIN)

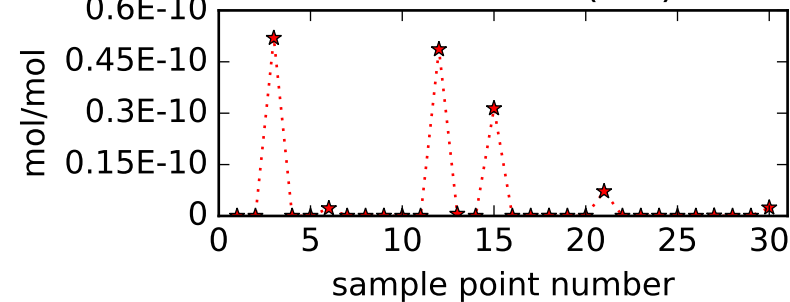

TLBIPERNO3 (LOG)

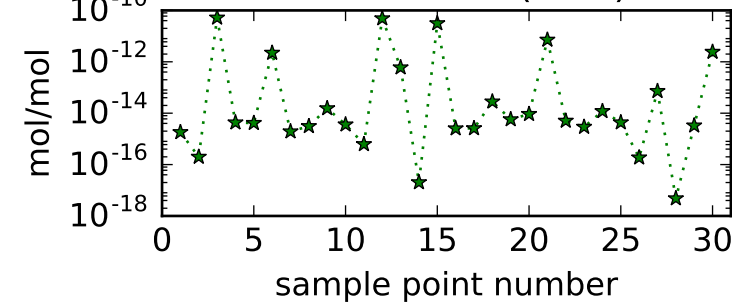

TLBIPERO2 (LIN)

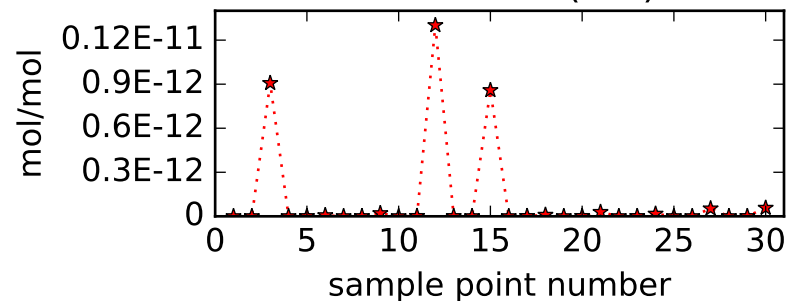

TLBIPERO2 (LOG)

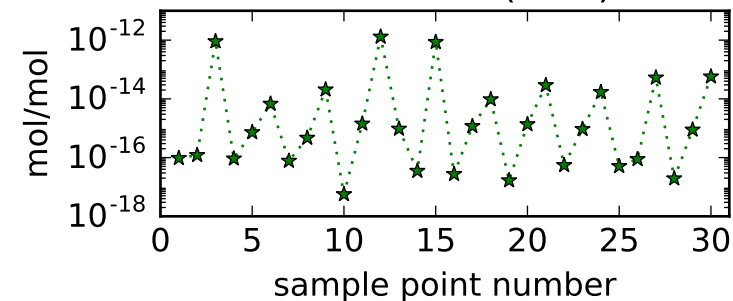

TLBIPEROOH (LIN)

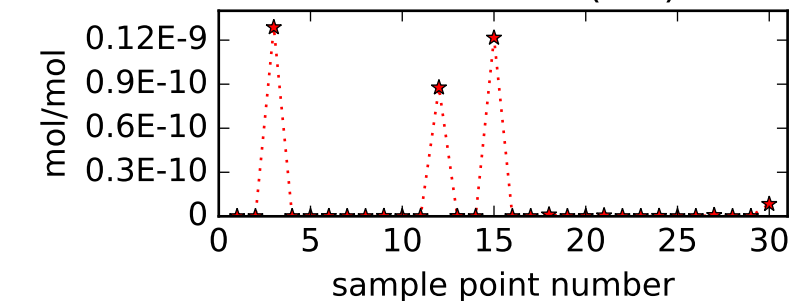

TLBIPEROOH (LOG)

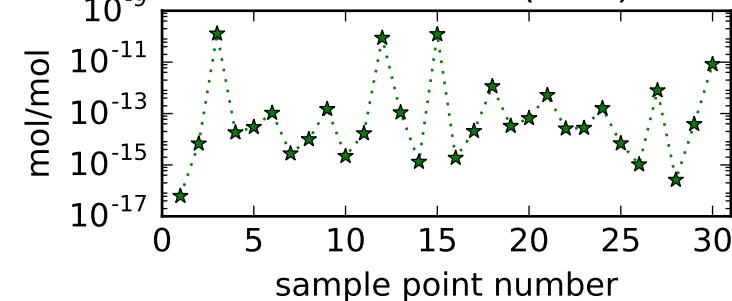

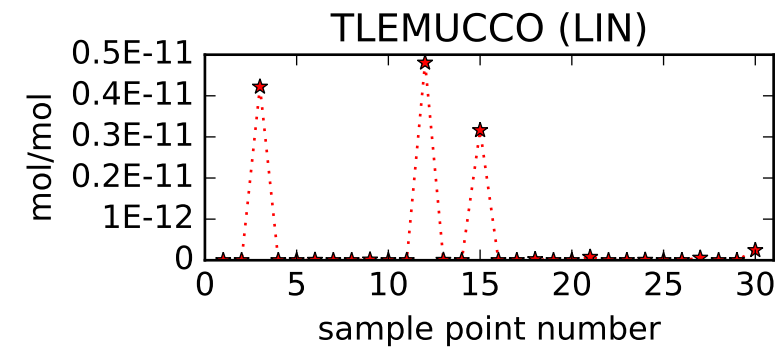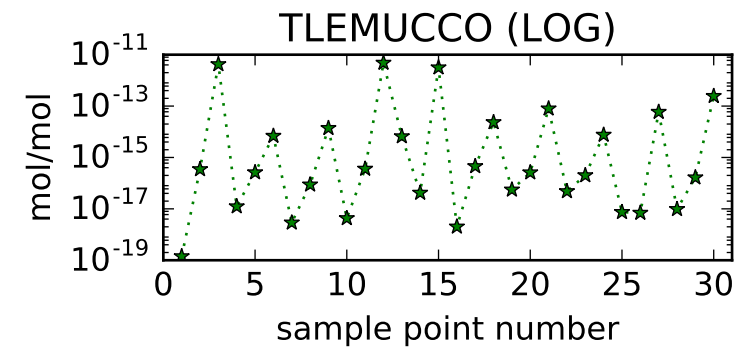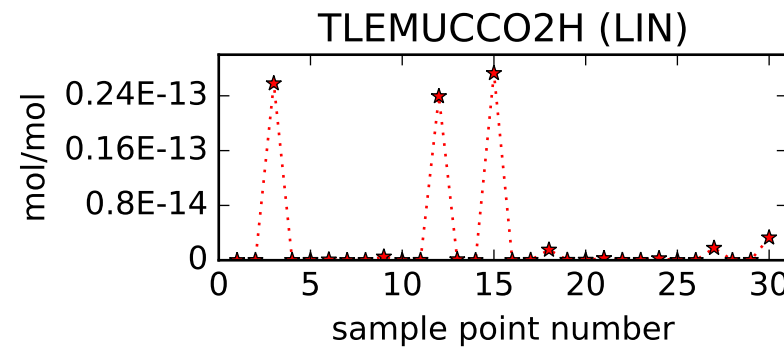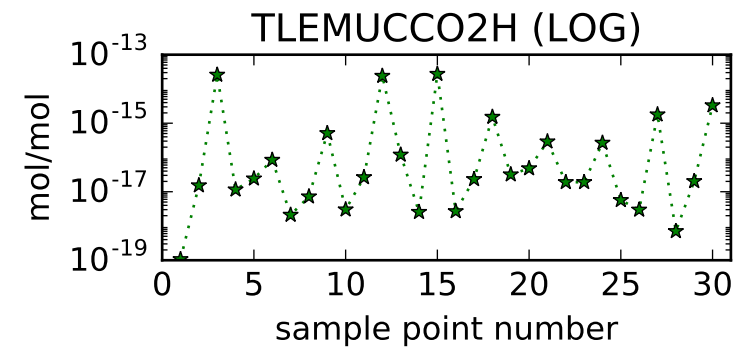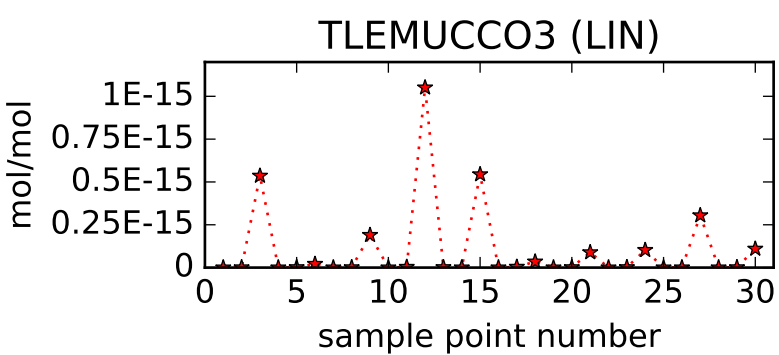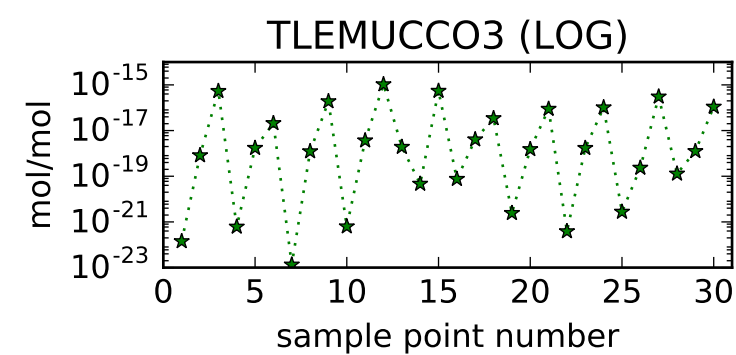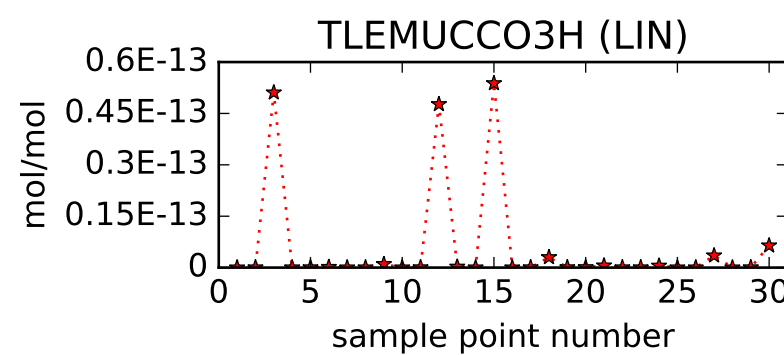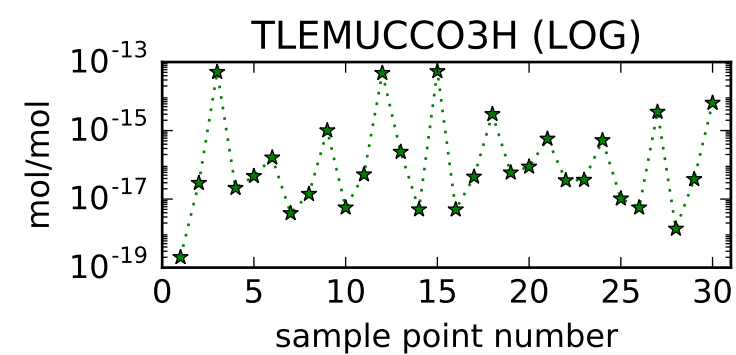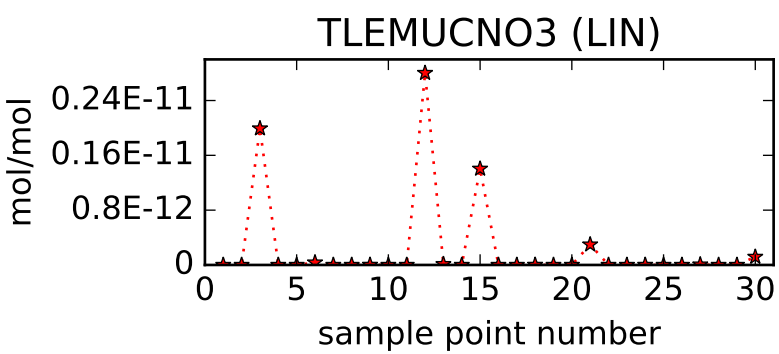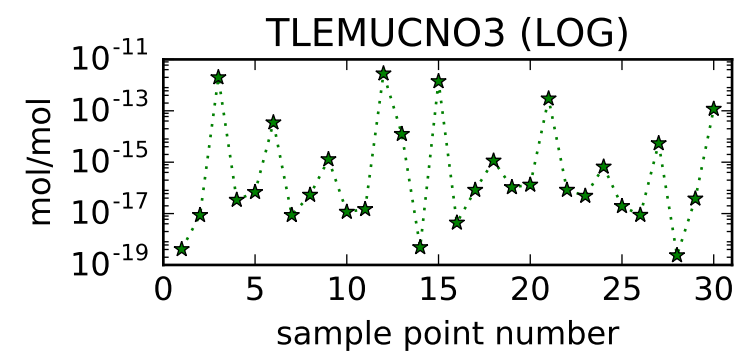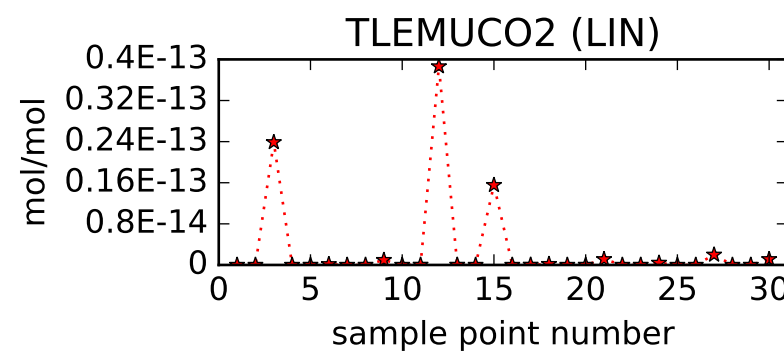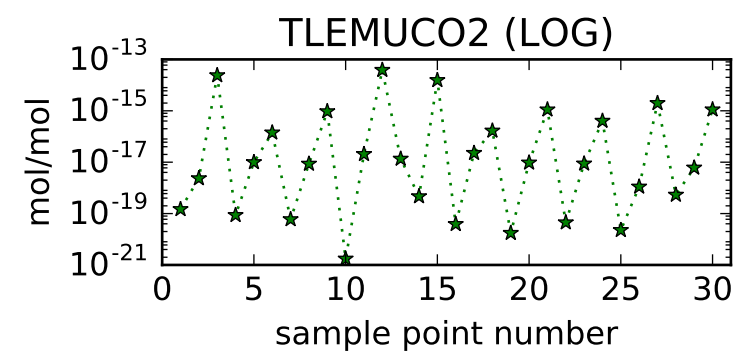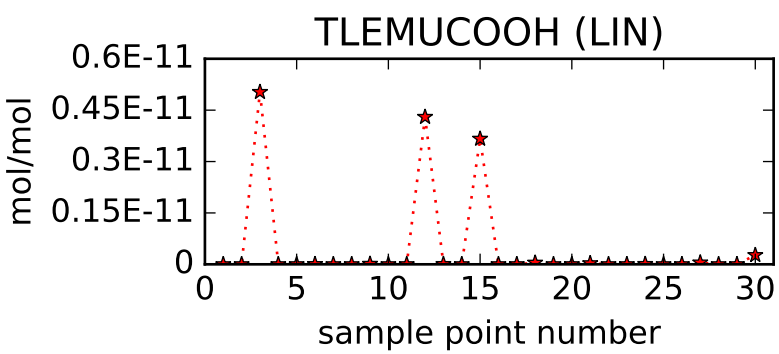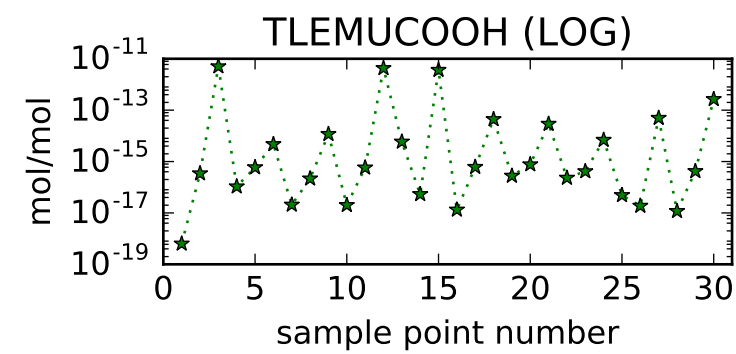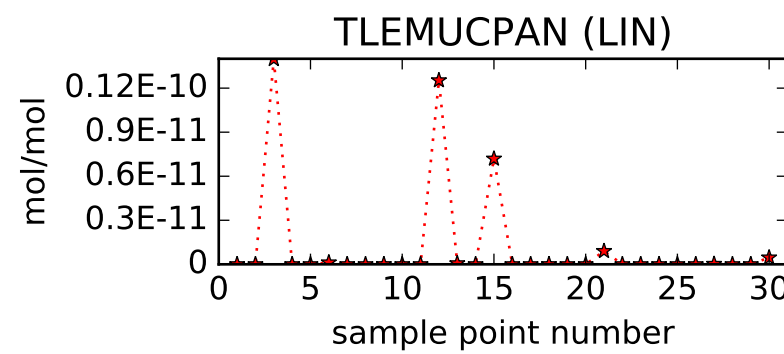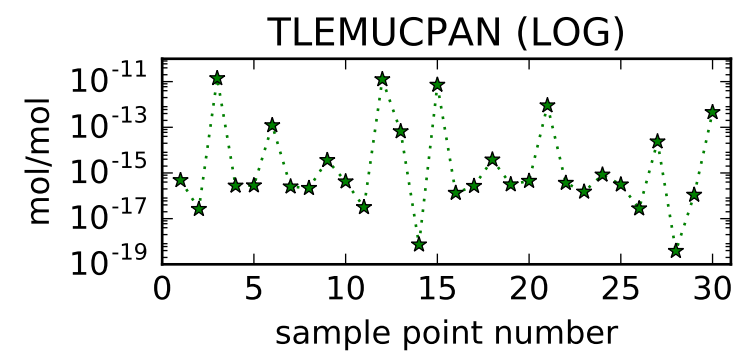



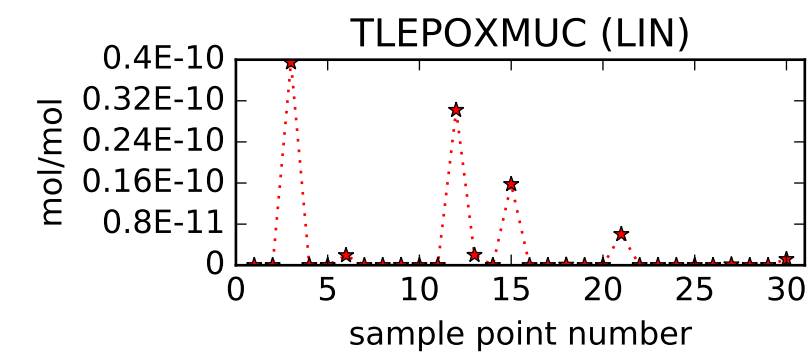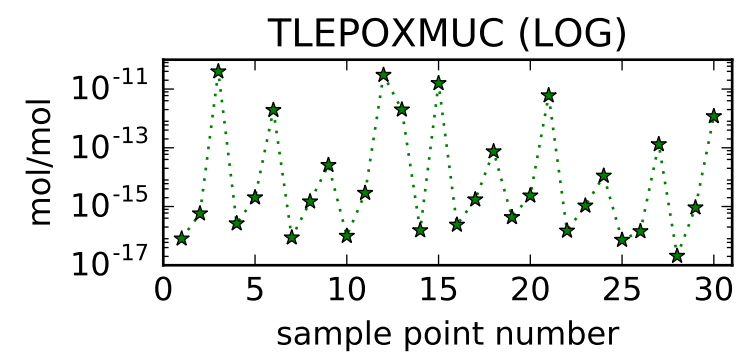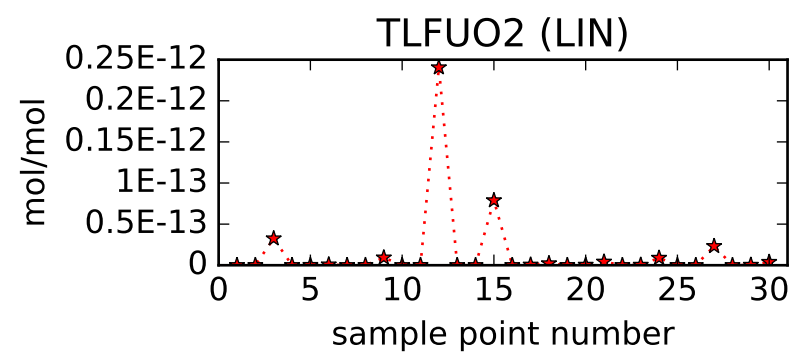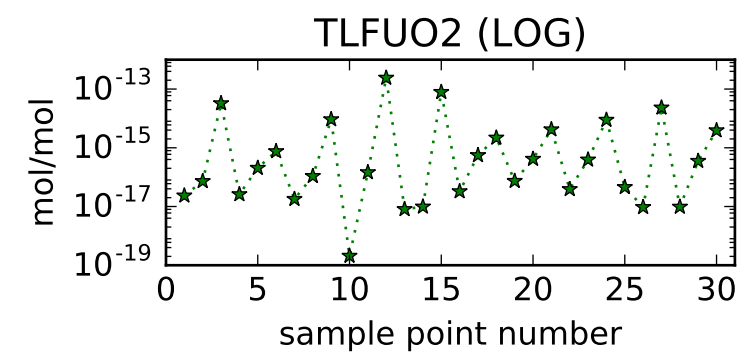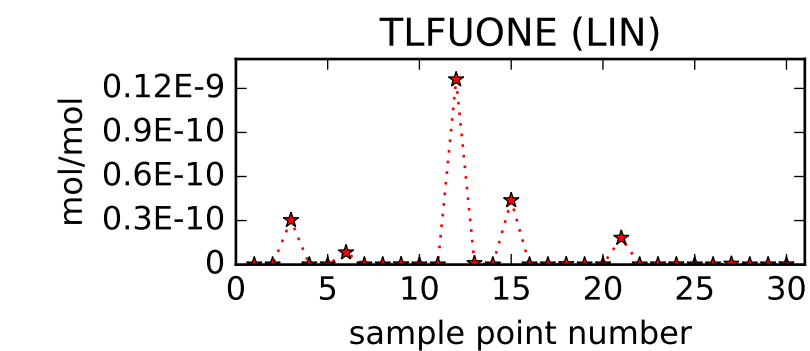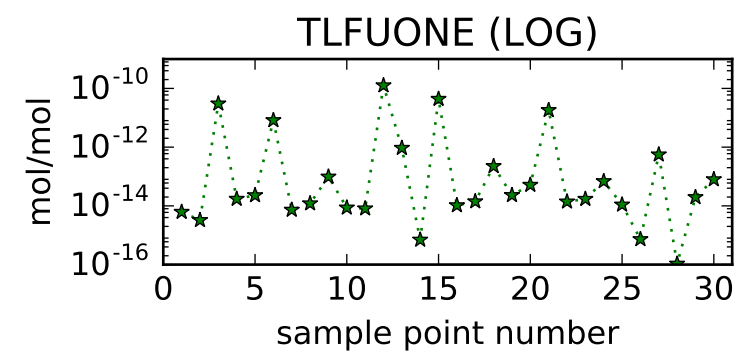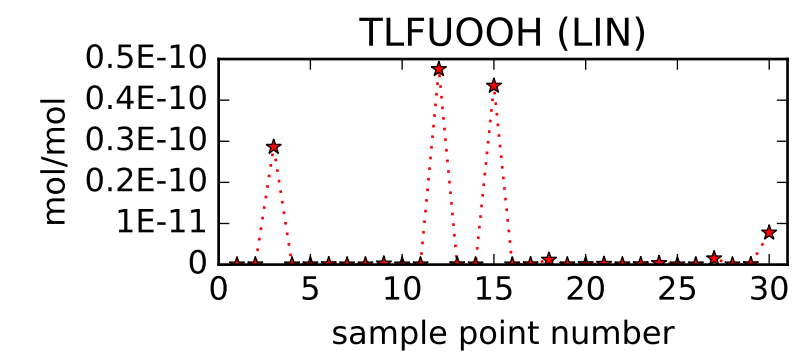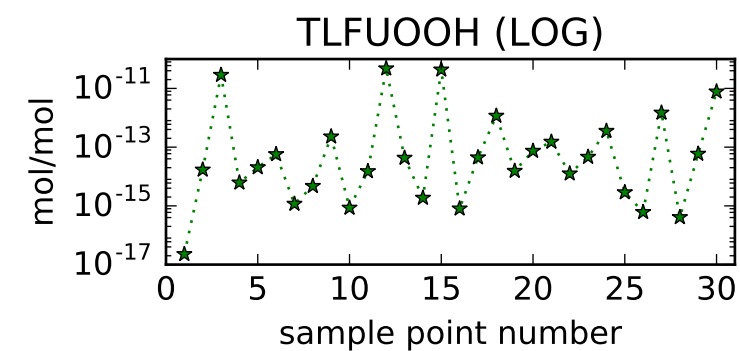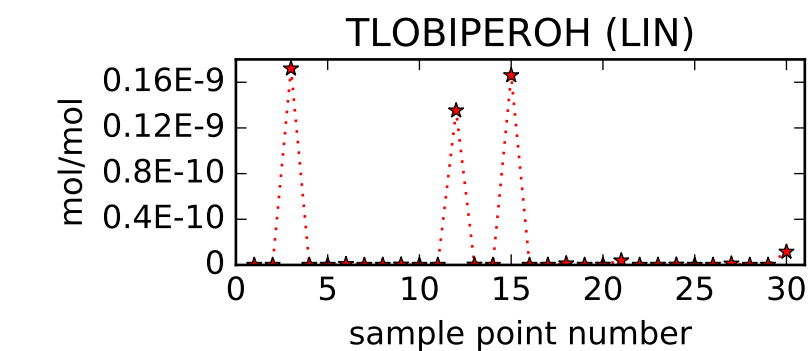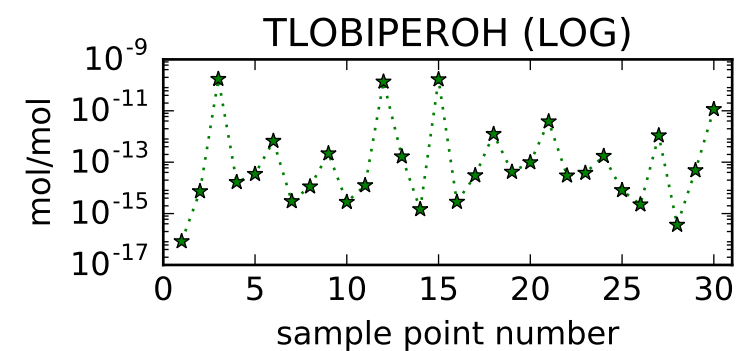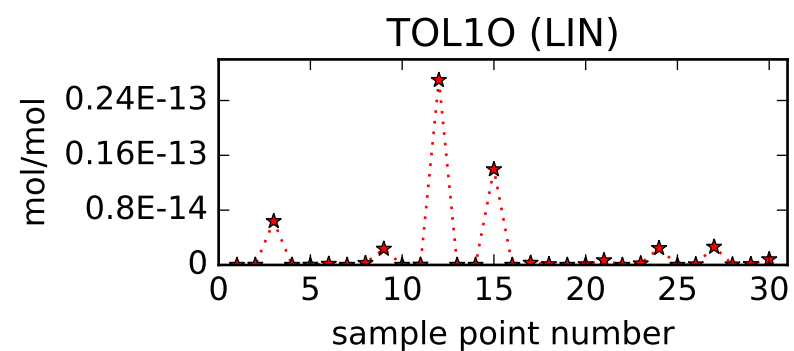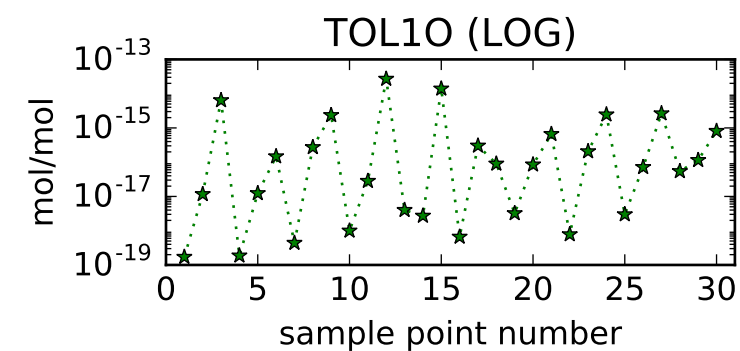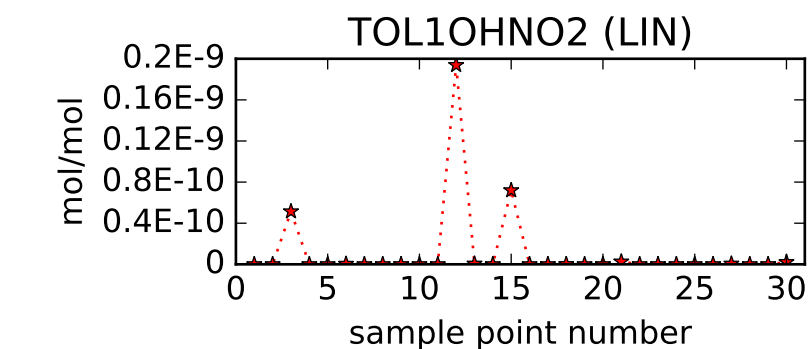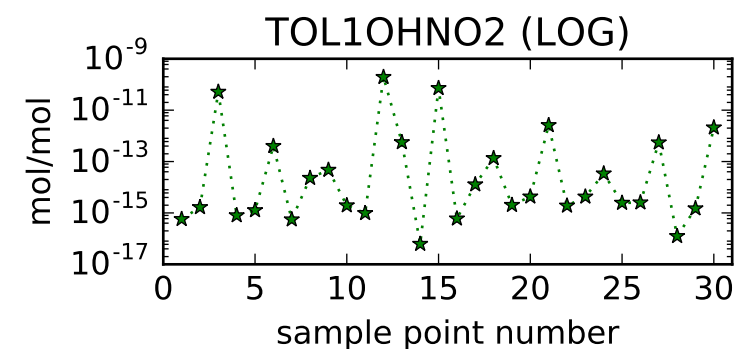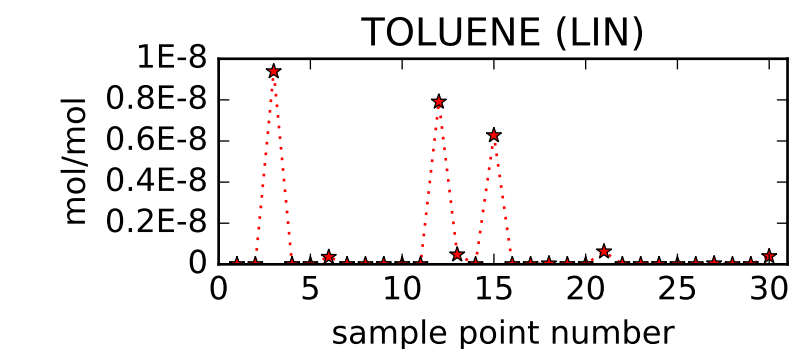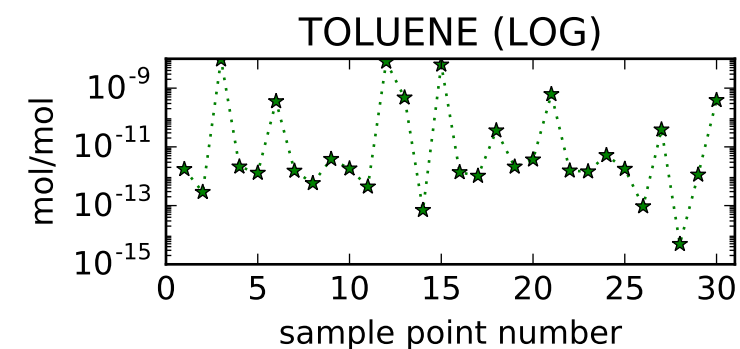

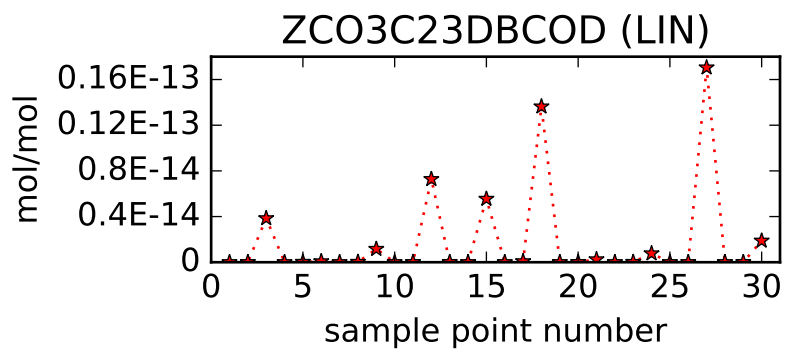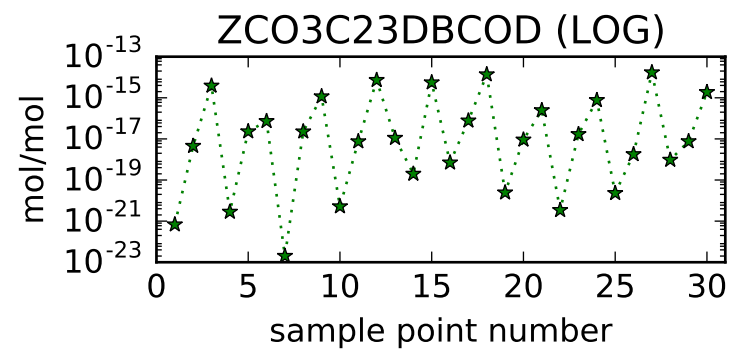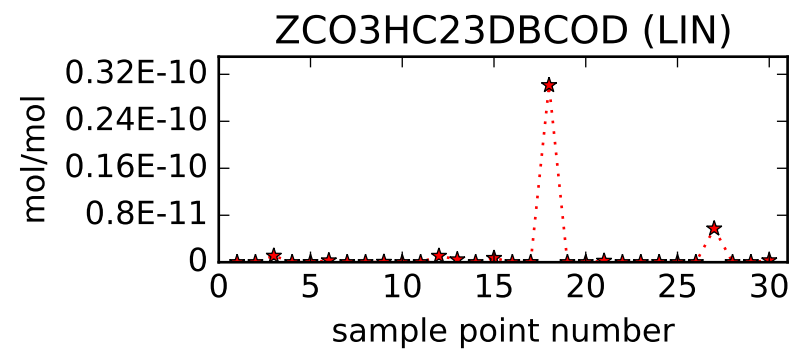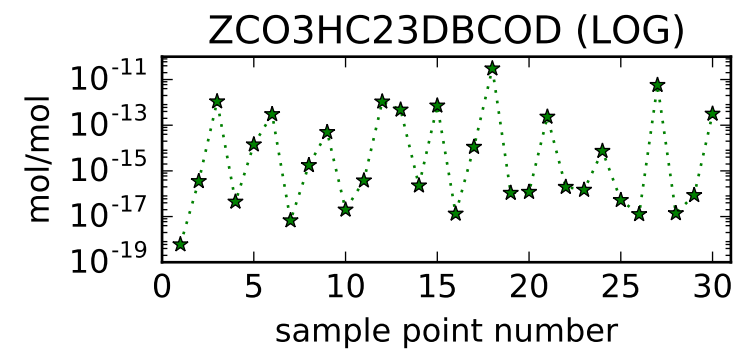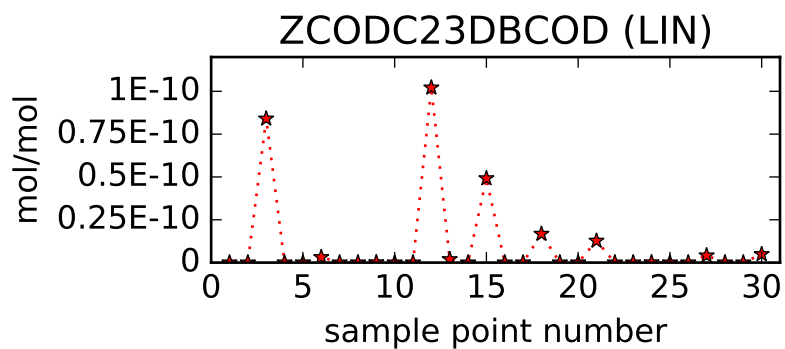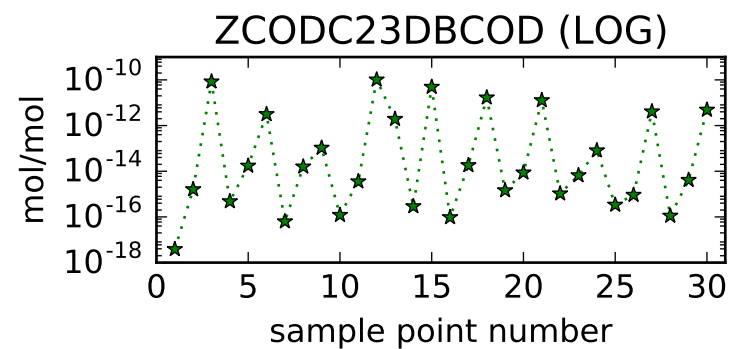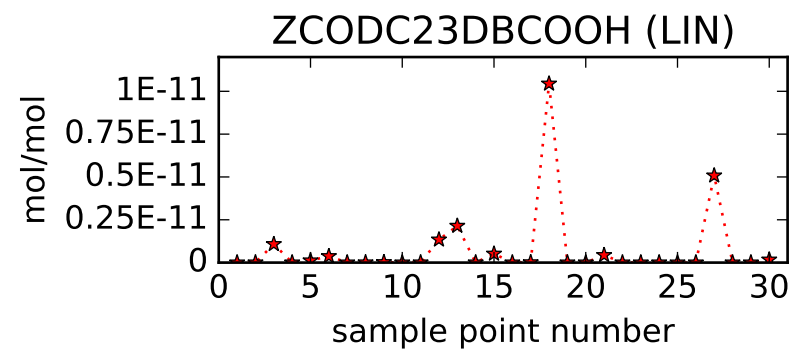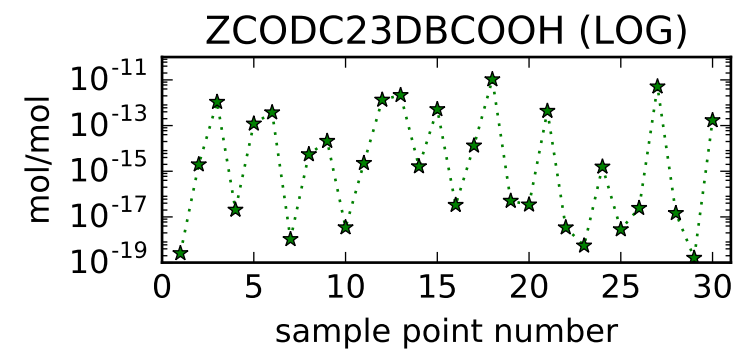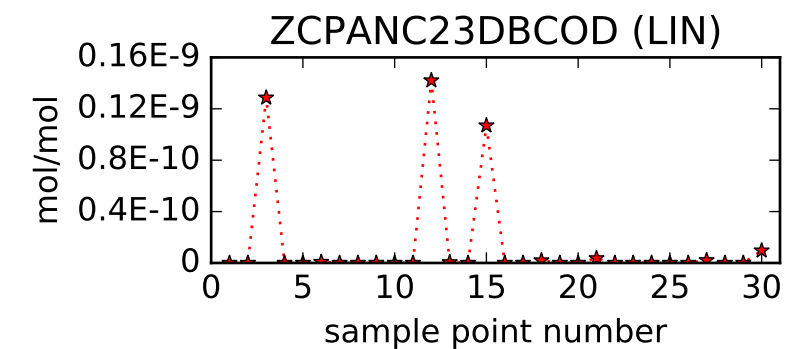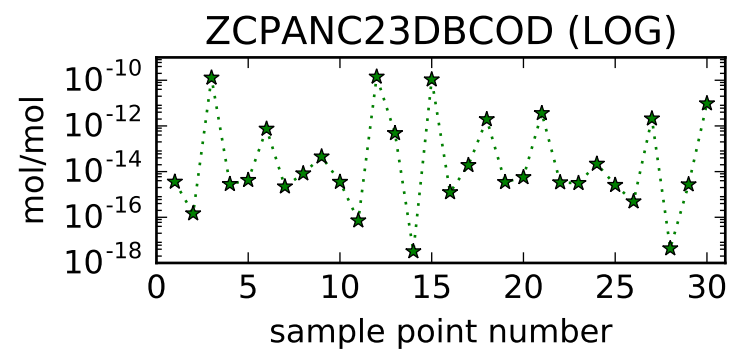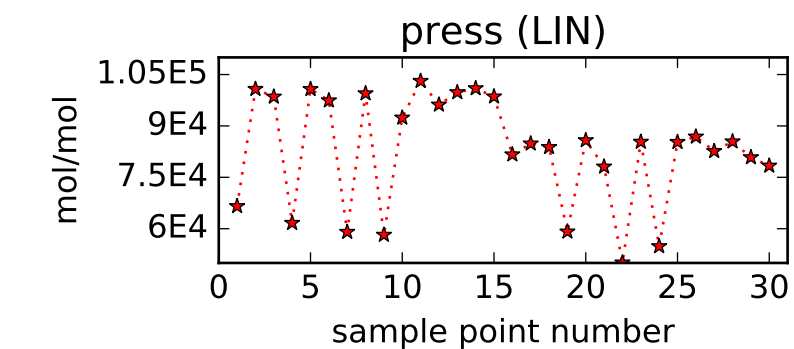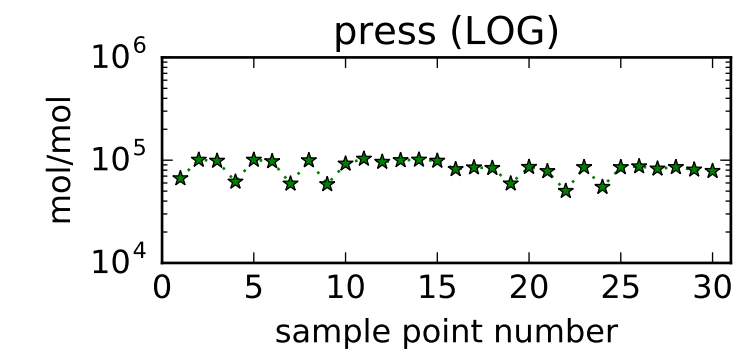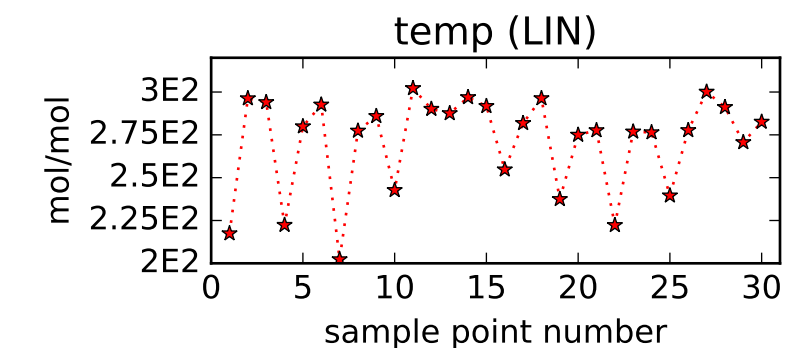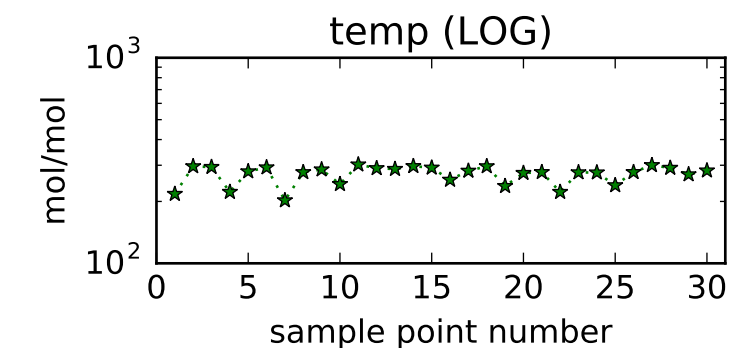

Supplement: Supplementary file 15 [file gmd-2018-201-supplement.zip]
