# Supplementary material for: The atmospheric chemistry box model CAABA/MECCA-4.0gmdd
Source: Copernicus journal article supplement (doi:10.5194/gmd-2018-201), 2018-09-03

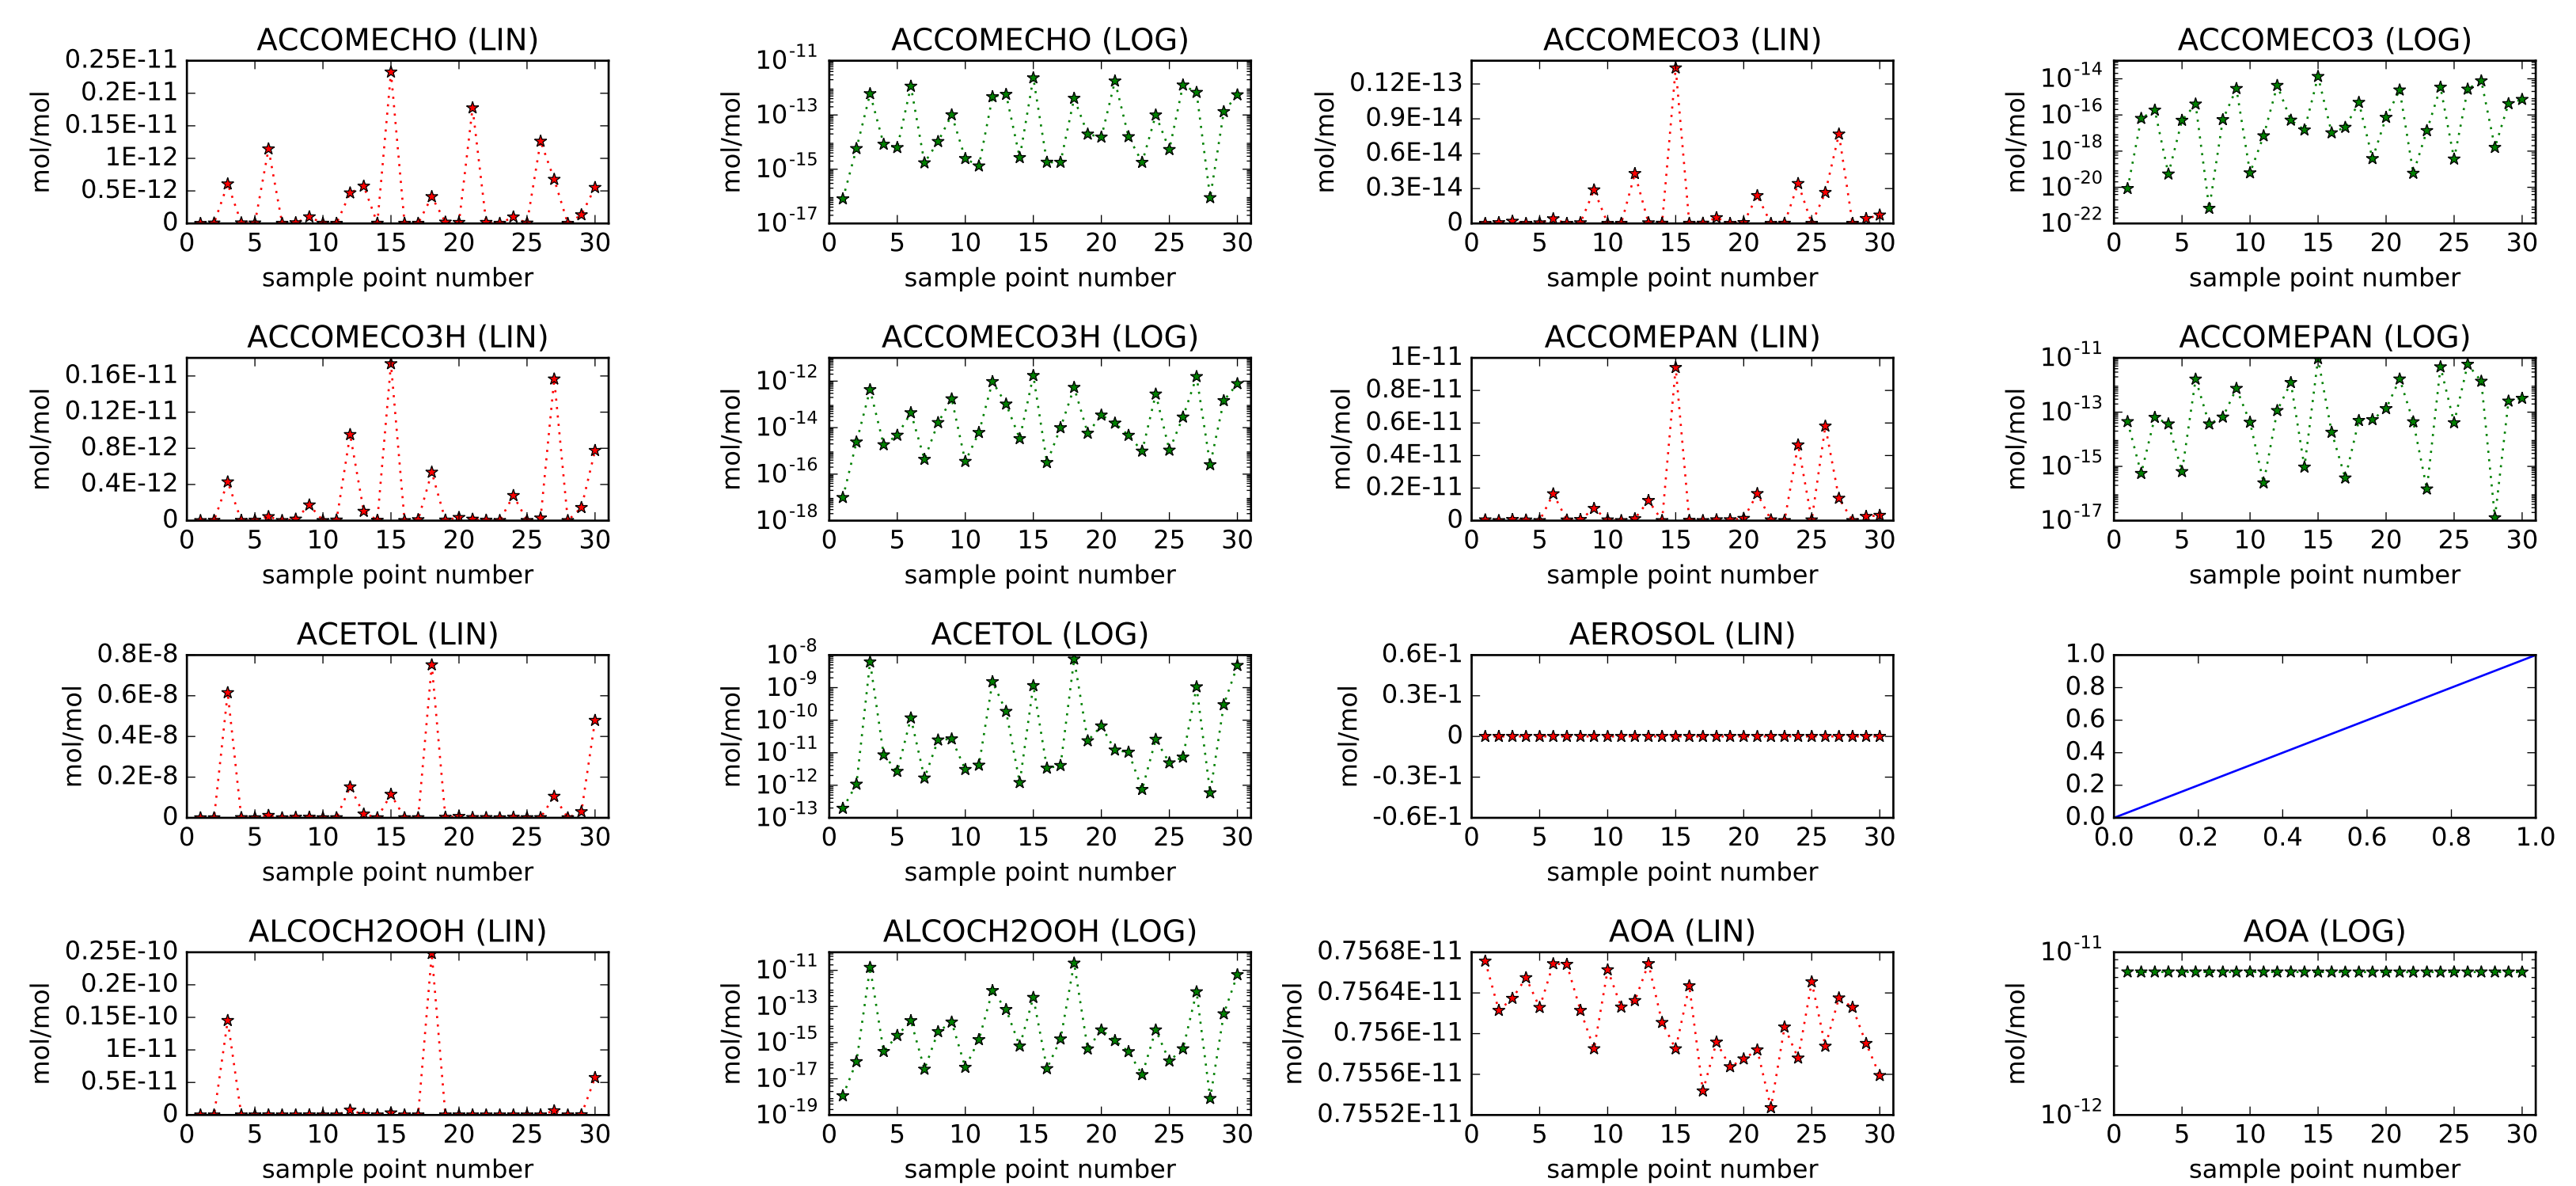

APINAOO (LIN)

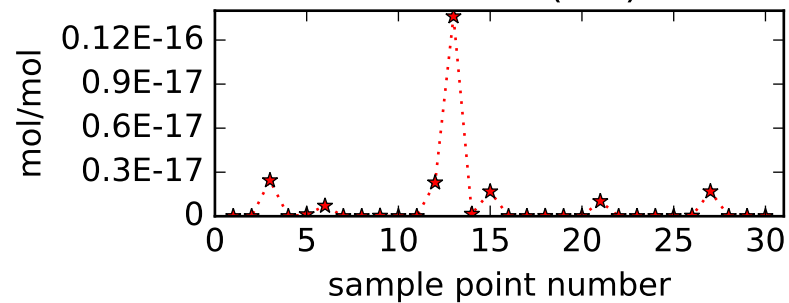

APINAOO (LOG)

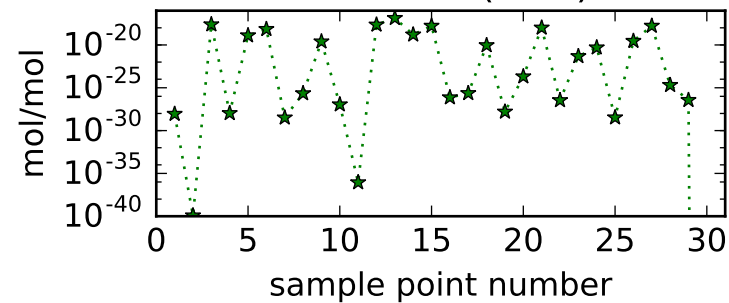

APINBOO (LIN)

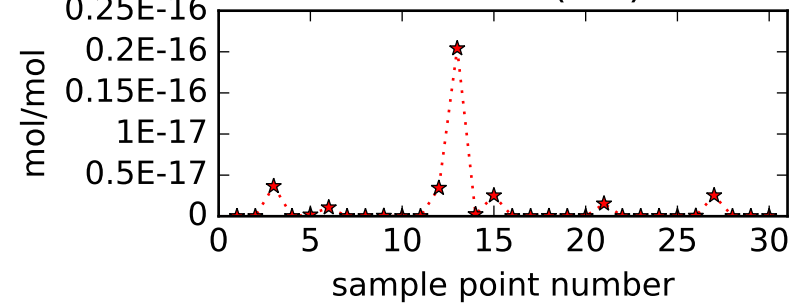

APINBOO (LOG)

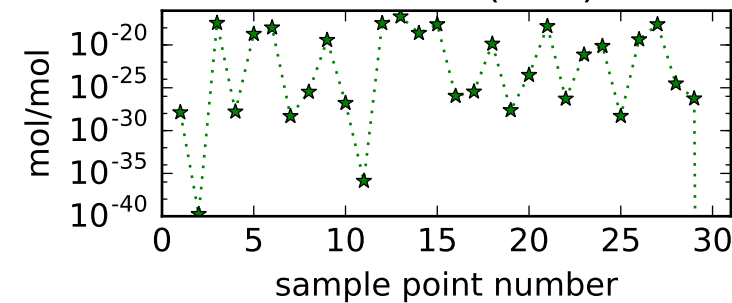

APINENE (LIN)

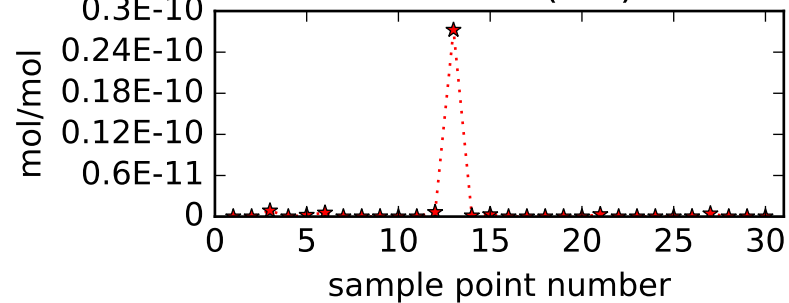

APINENE (LOG)

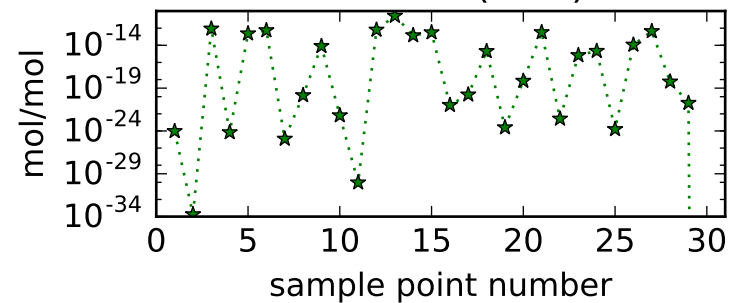

BENZAL (LIN)

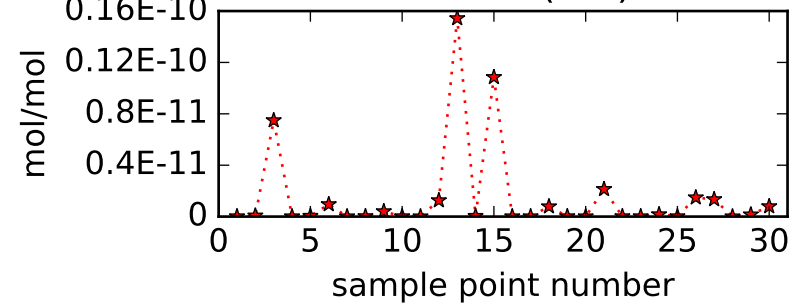

BENZAL (LOG)

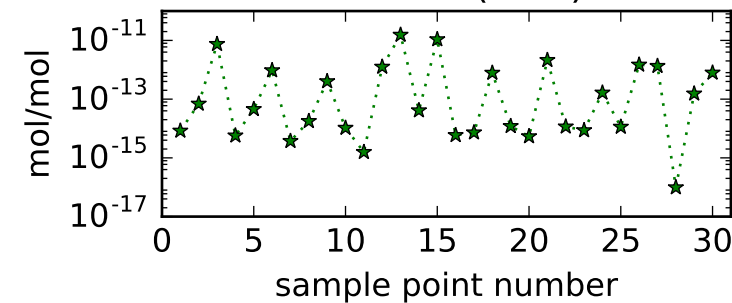

BENZENE (LIN)

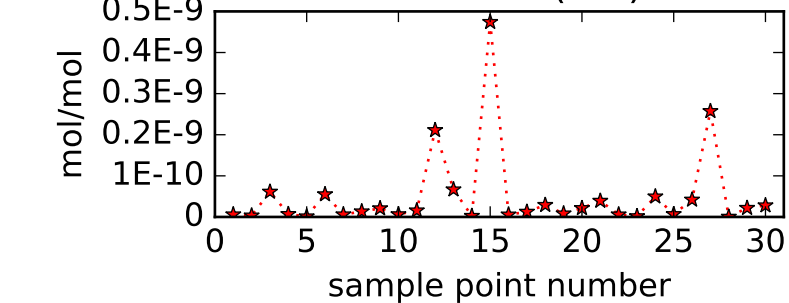

BENZENE (LOG)

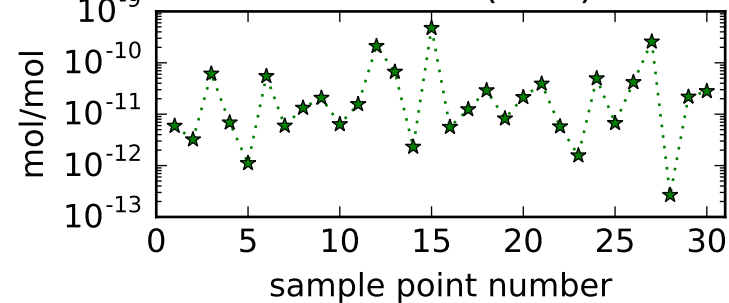

BIACET (LIN)

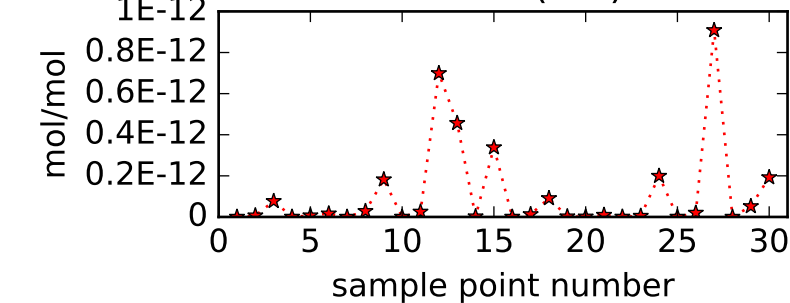

BIACET (LOG)

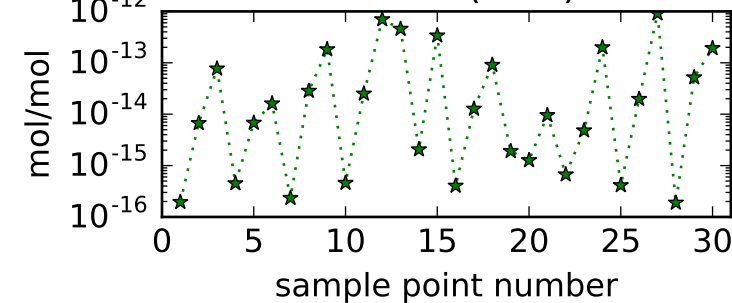

BIACETO2 (LIN)

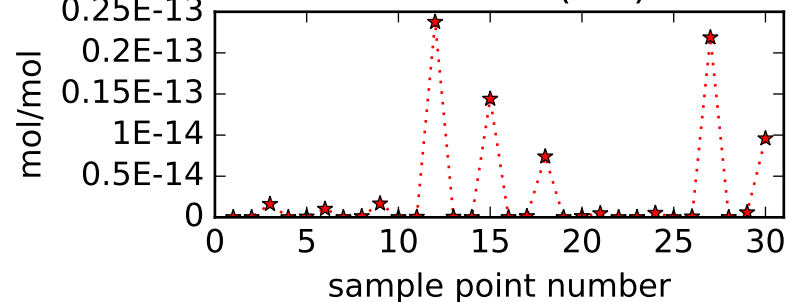

BIACETO2 (LOG)

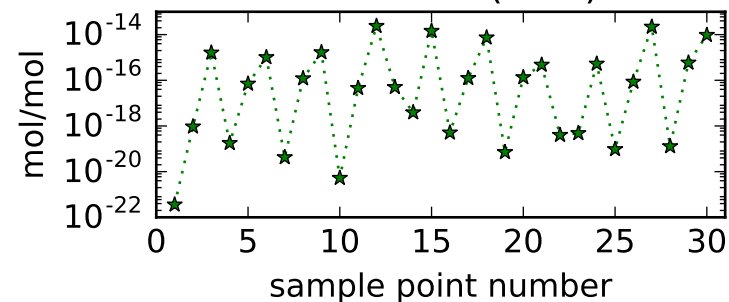

BIACETOH (LIN)

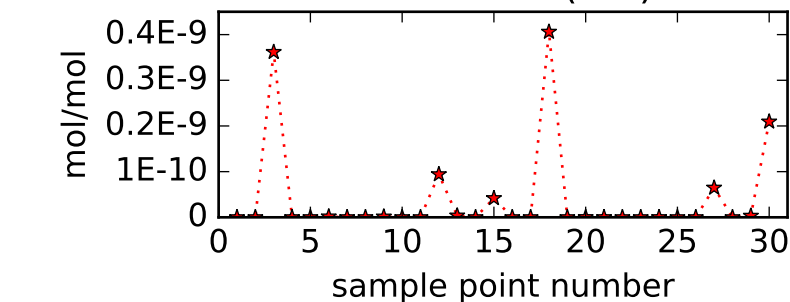

BIACETOH (LOG)

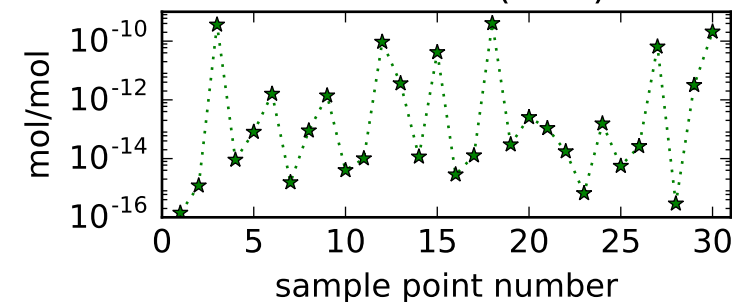

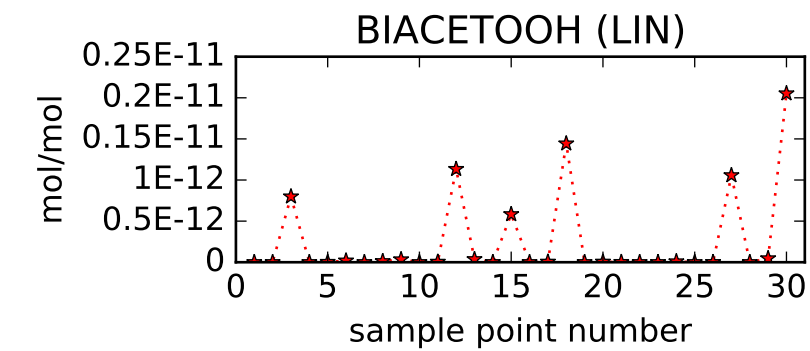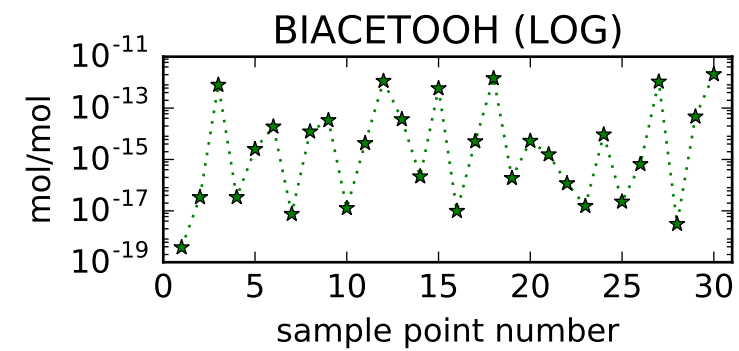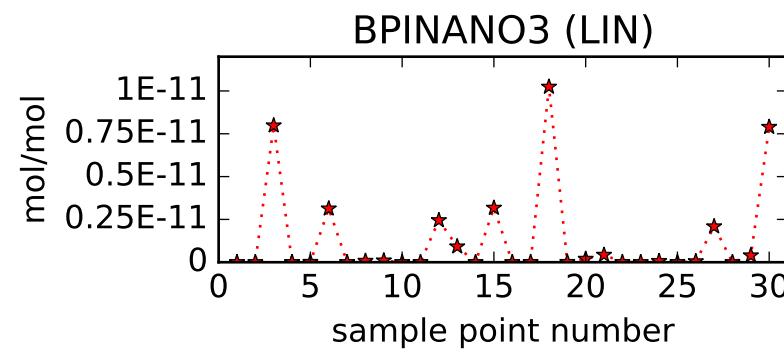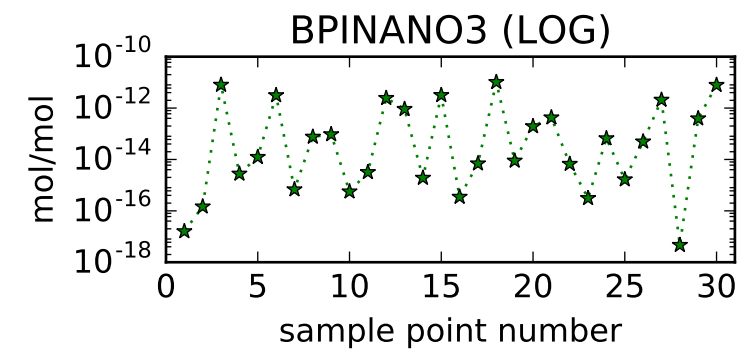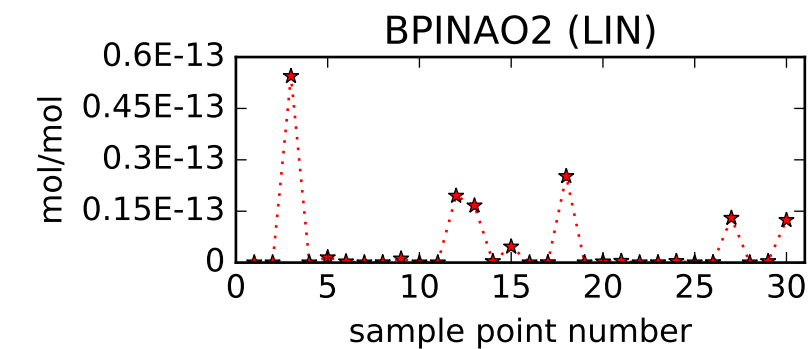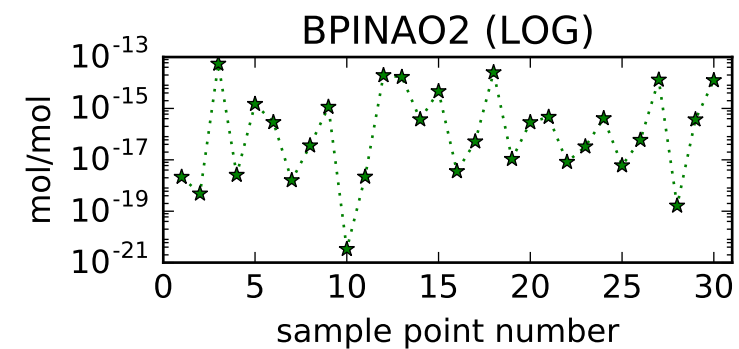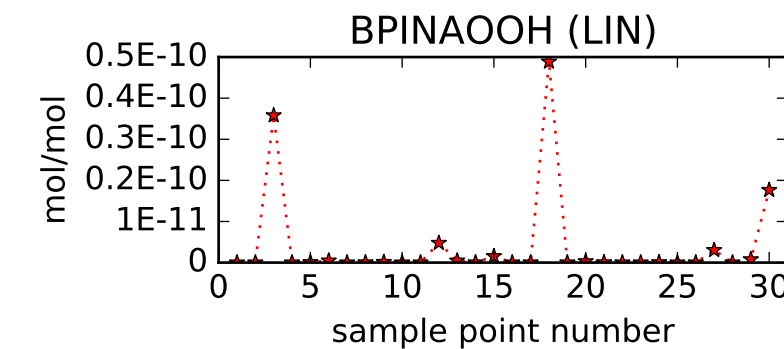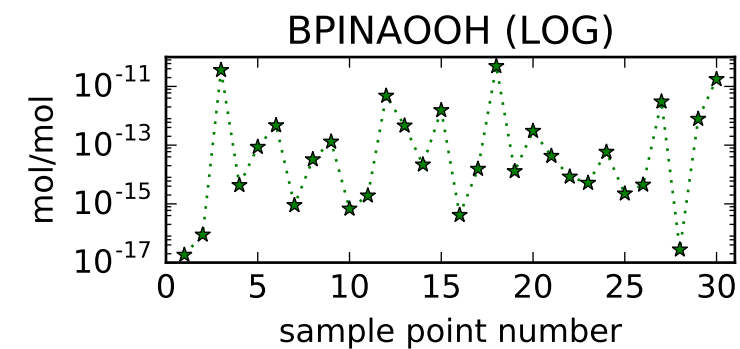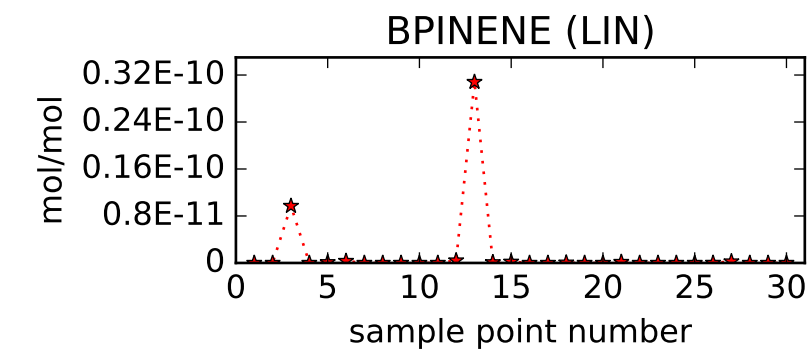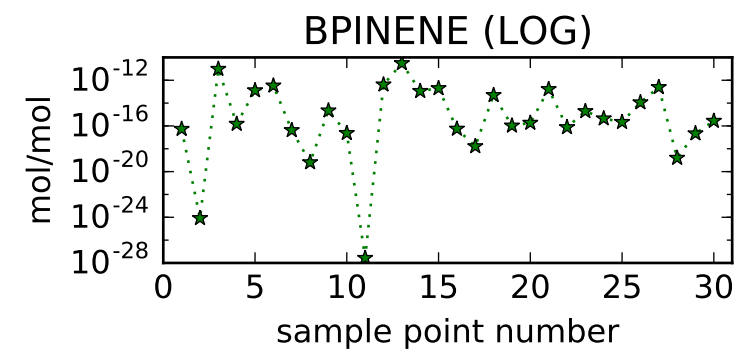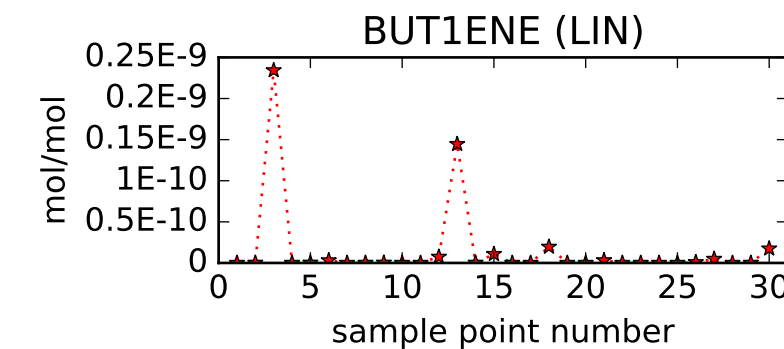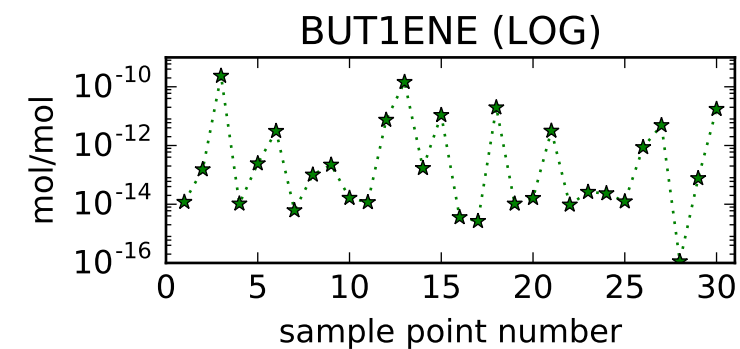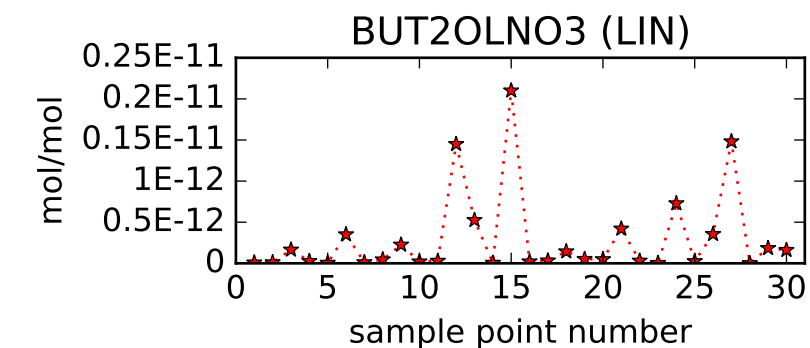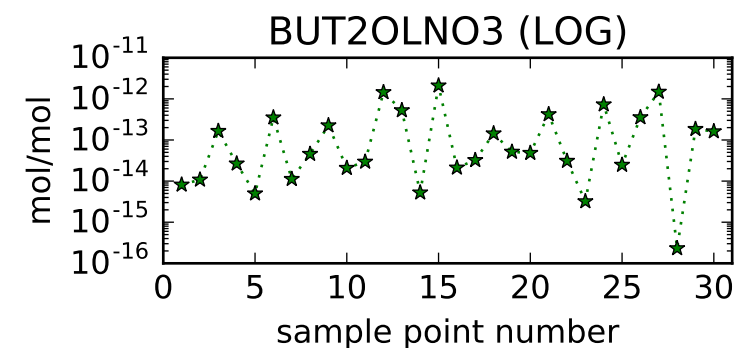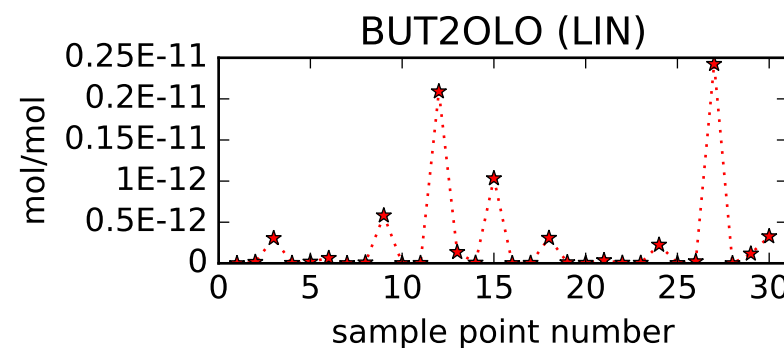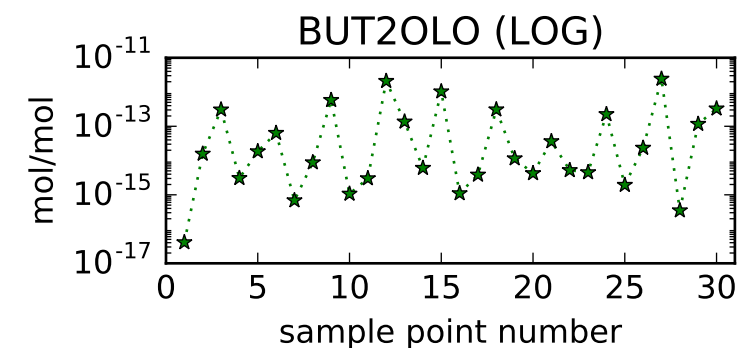

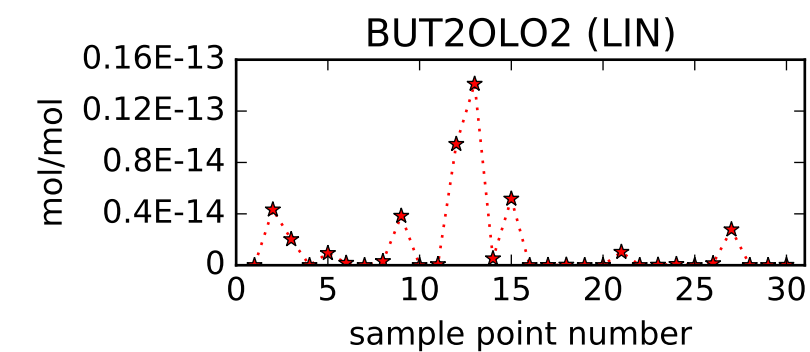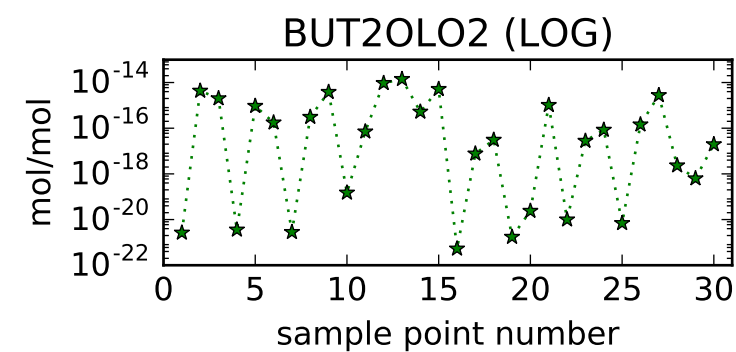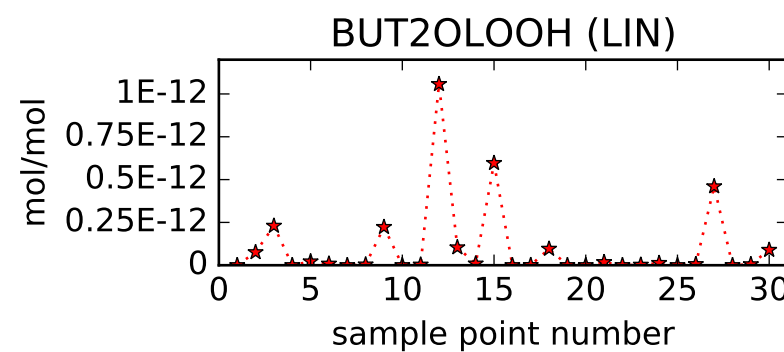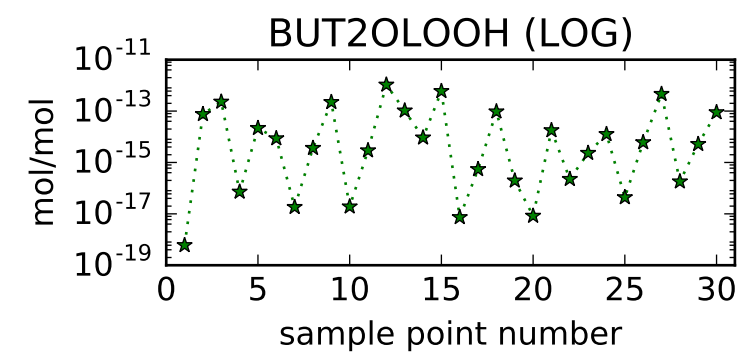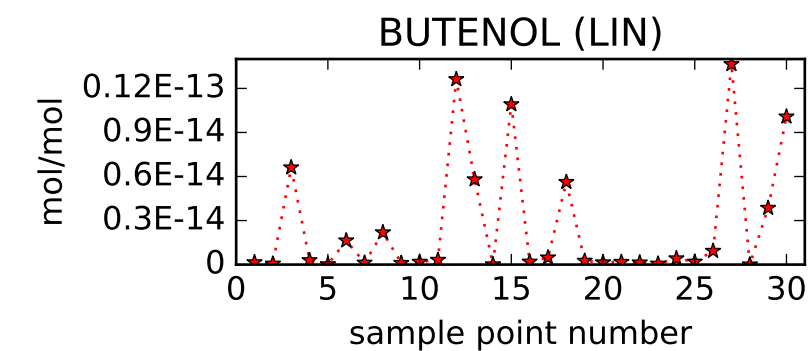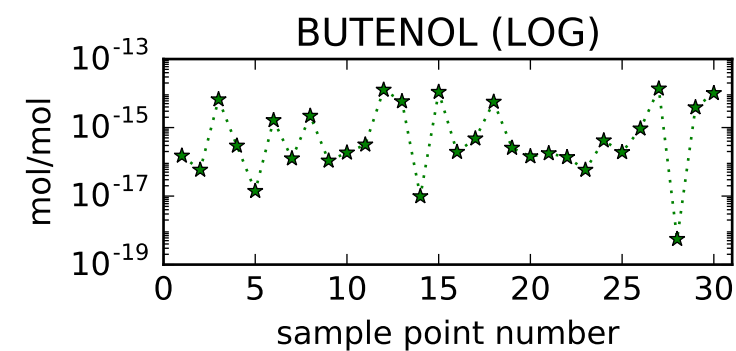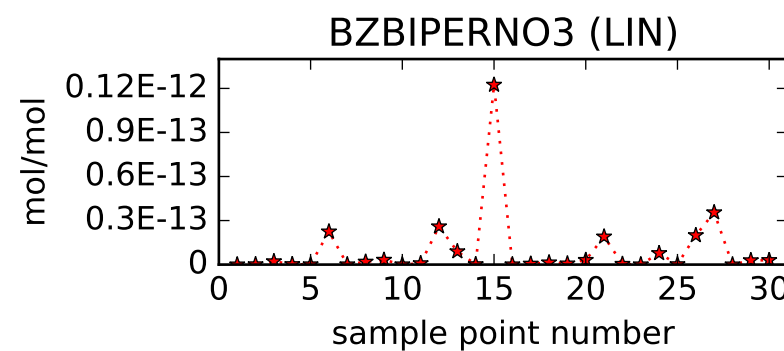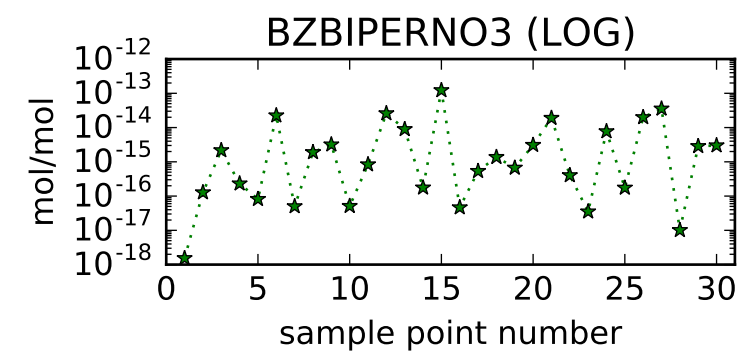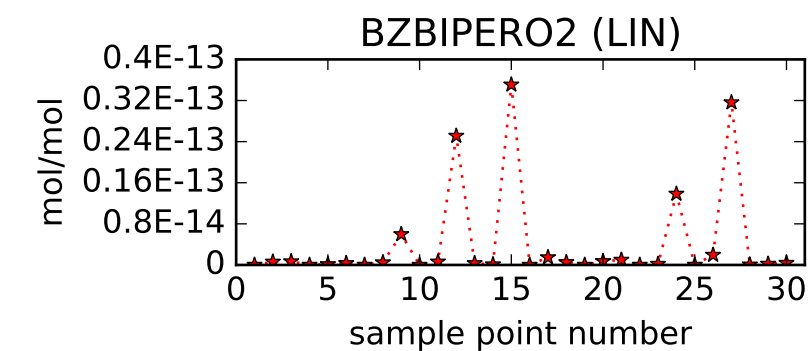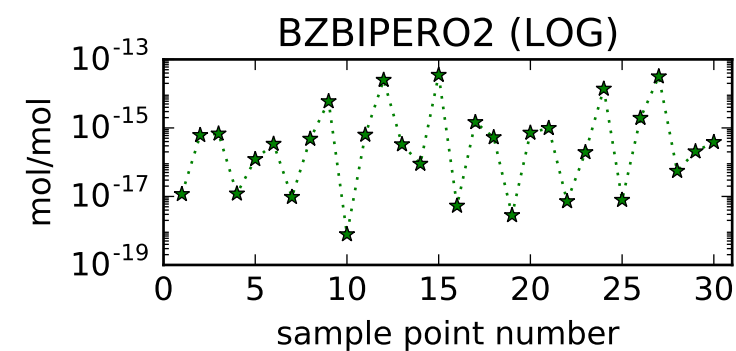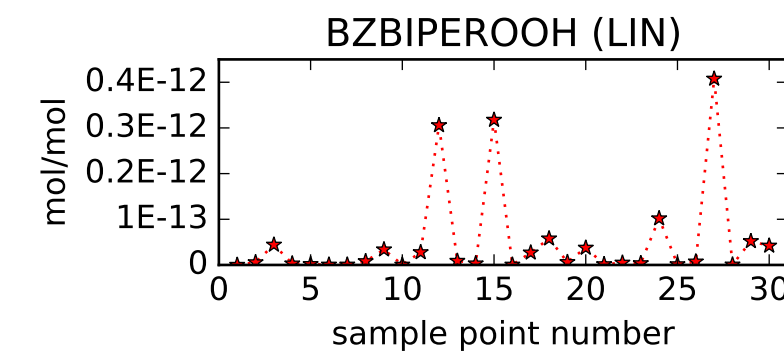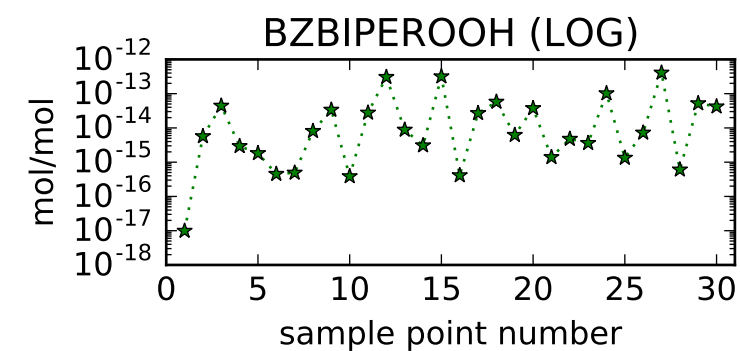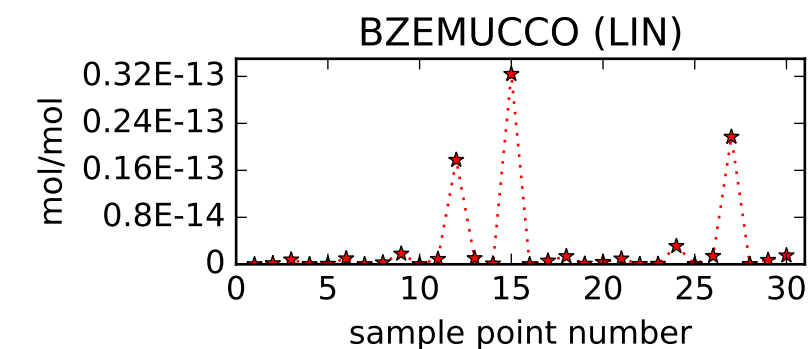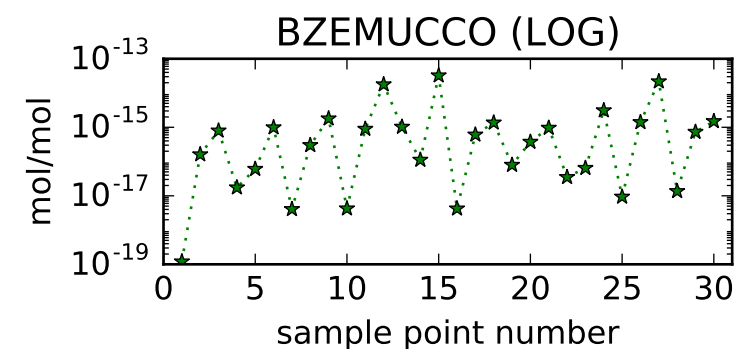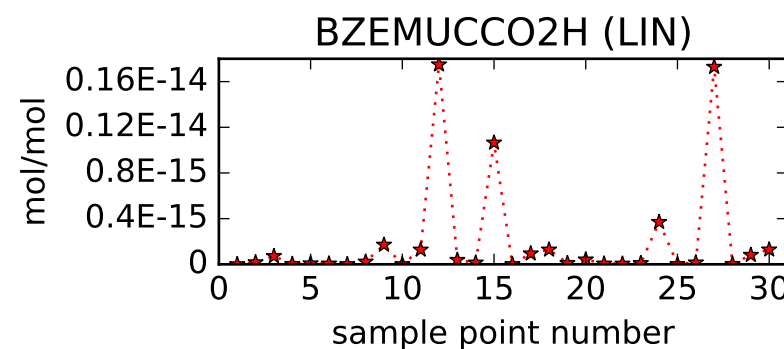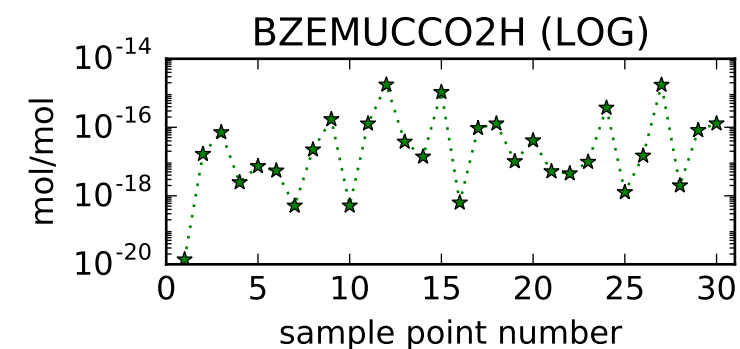

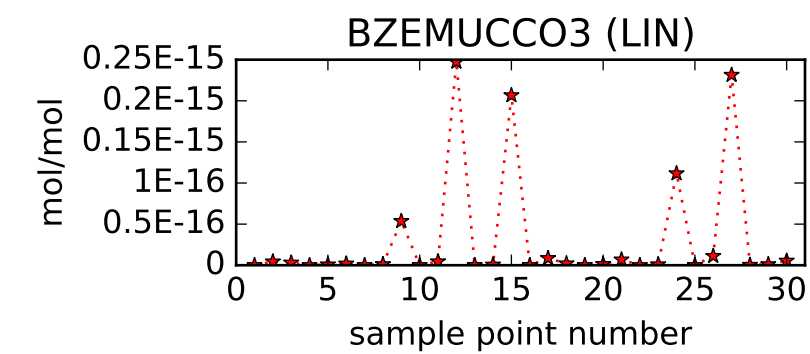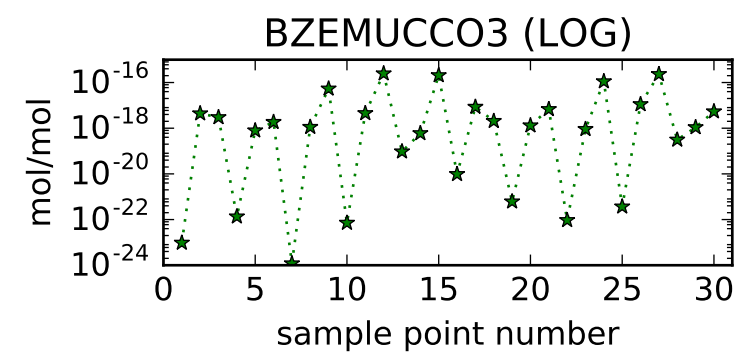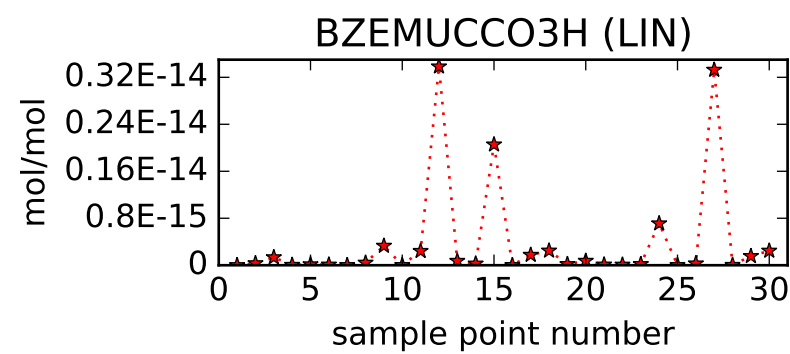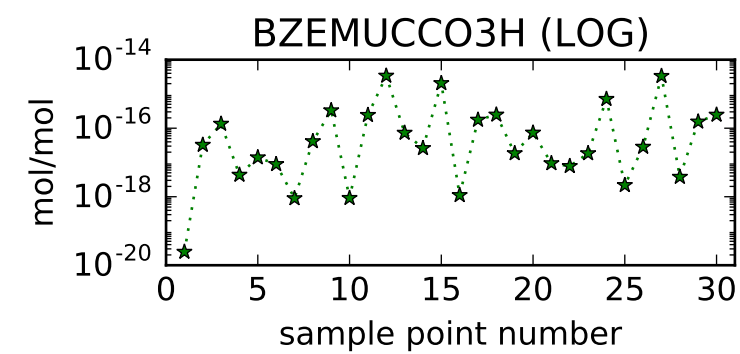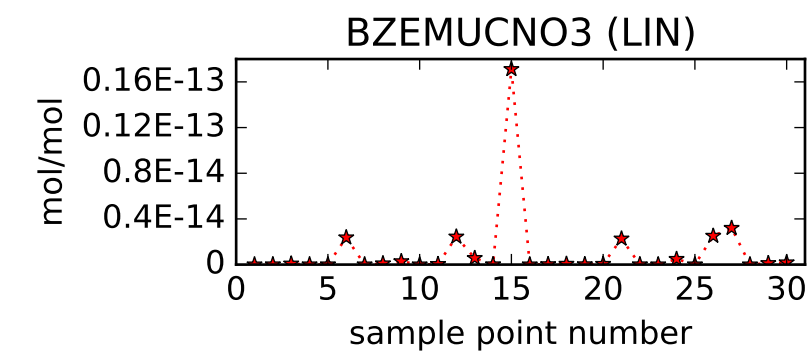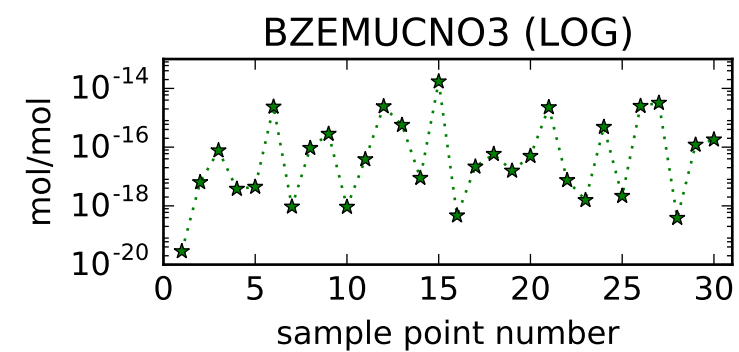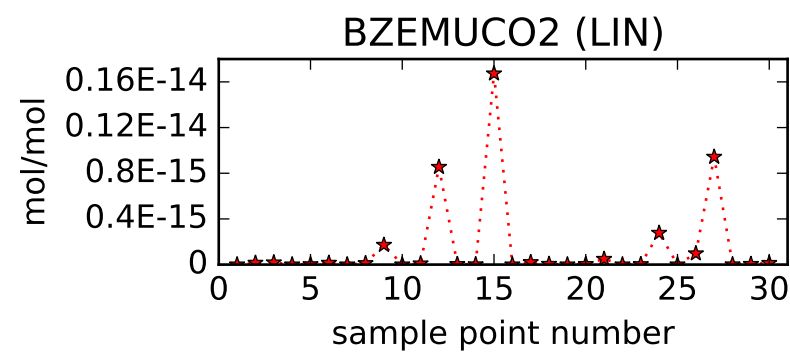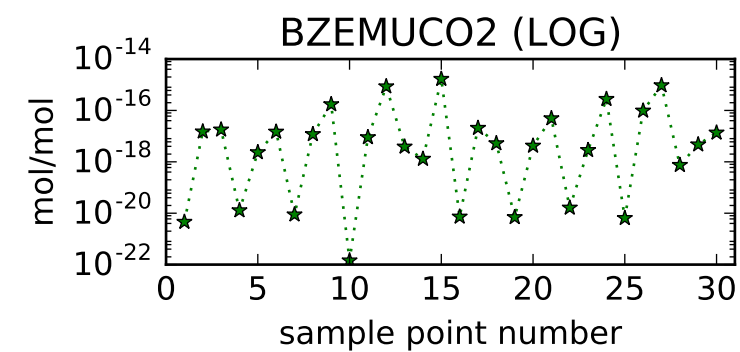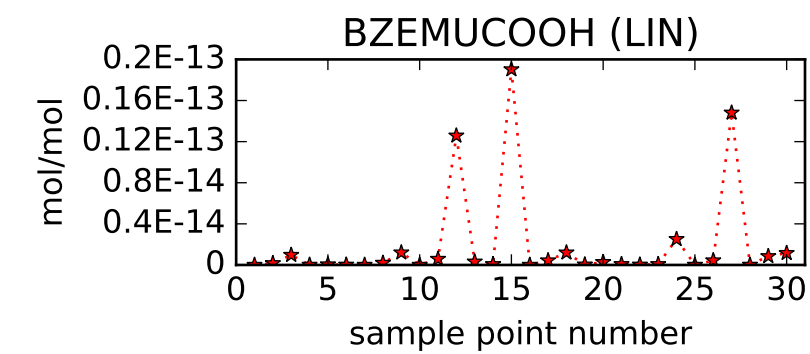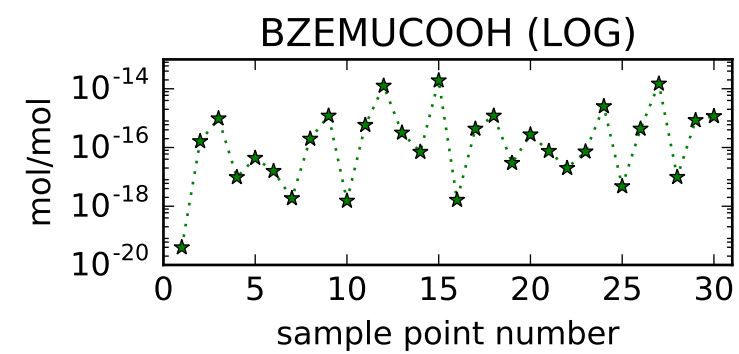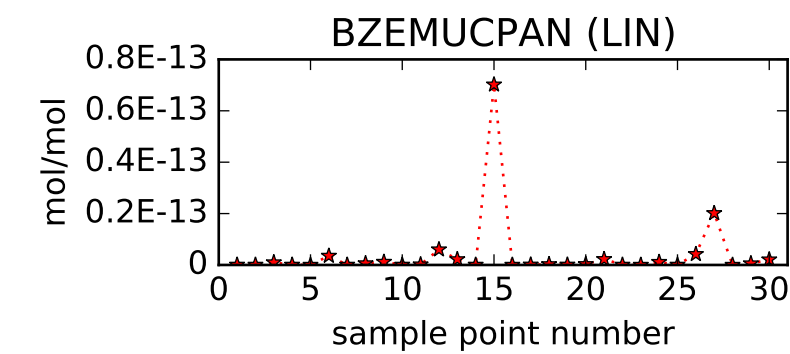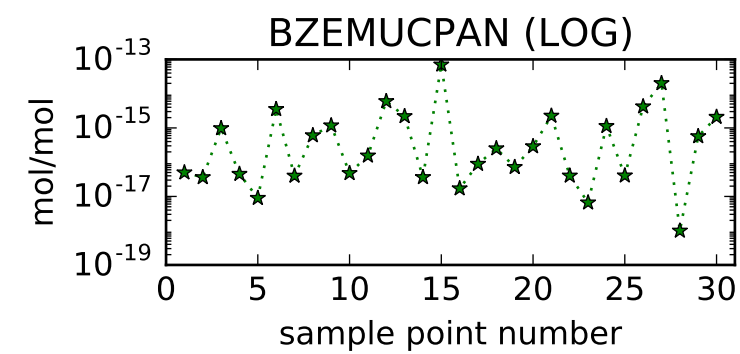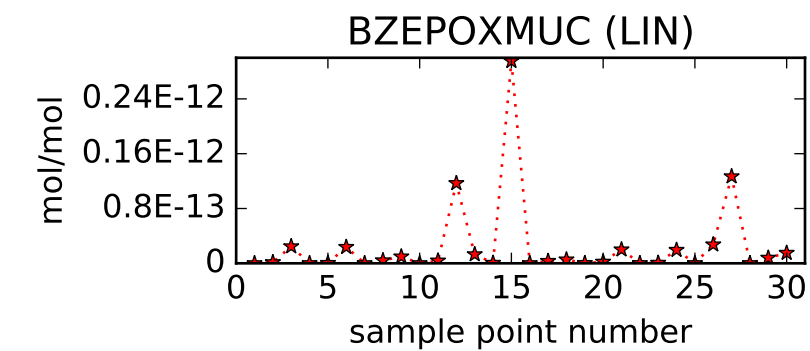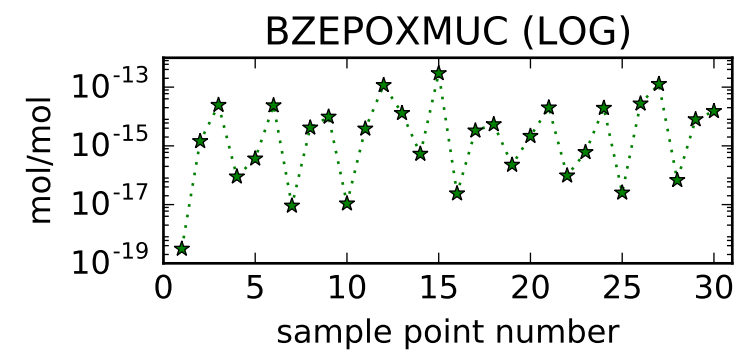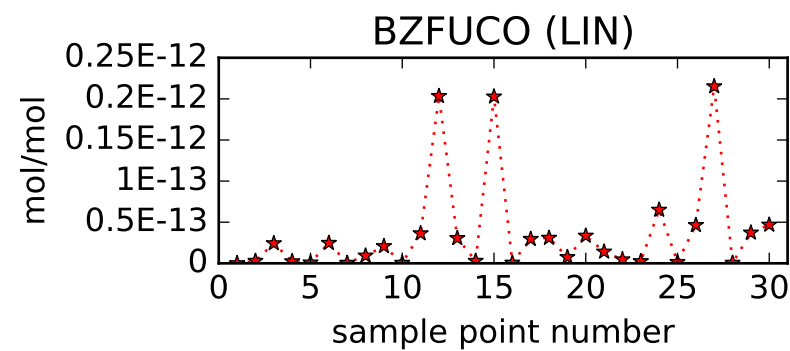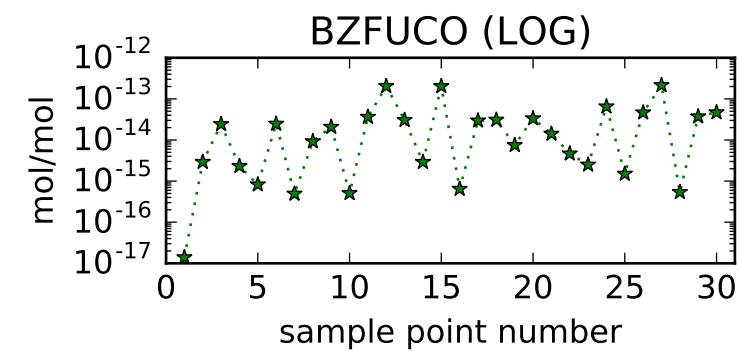



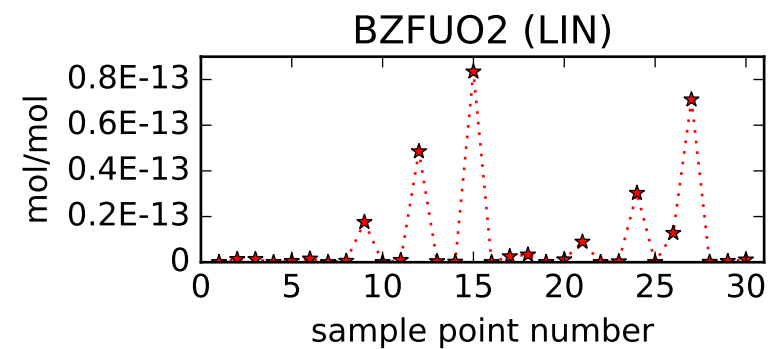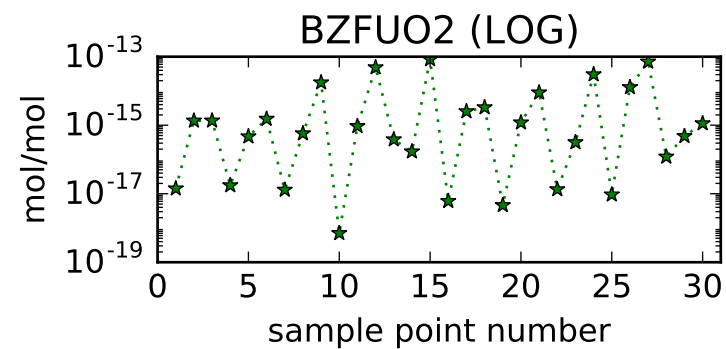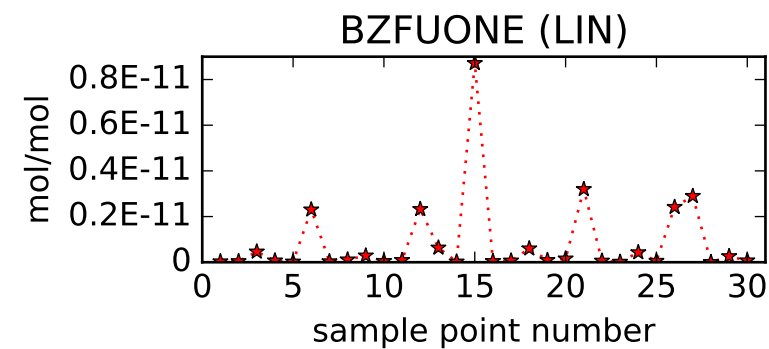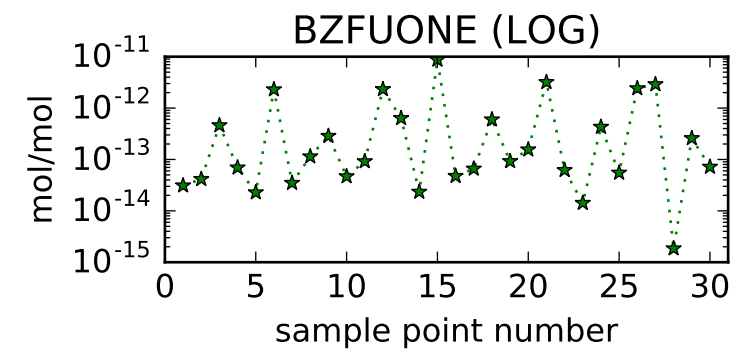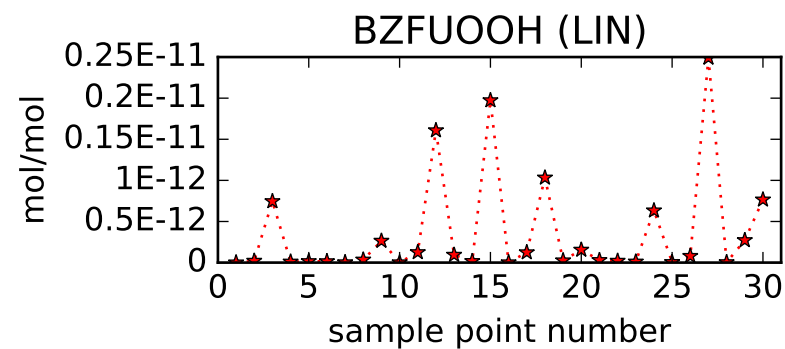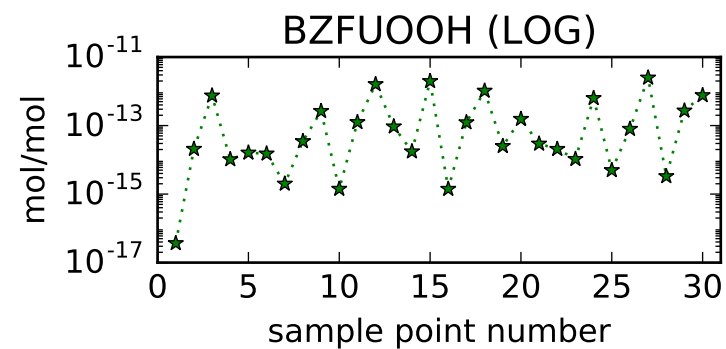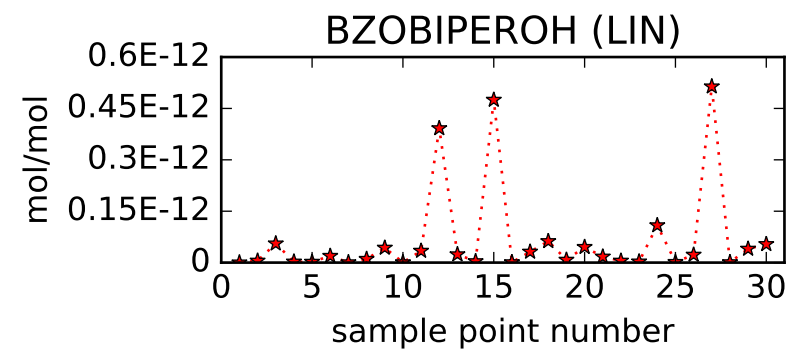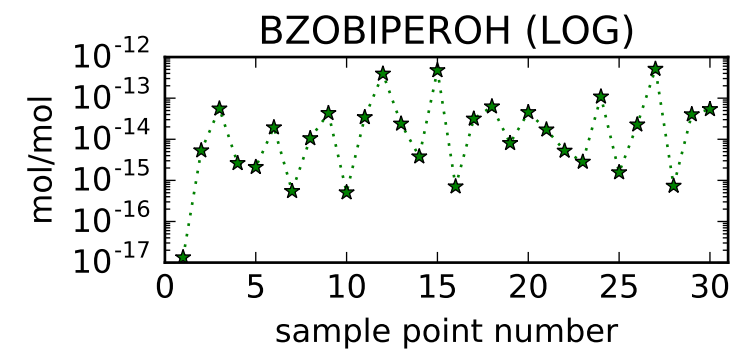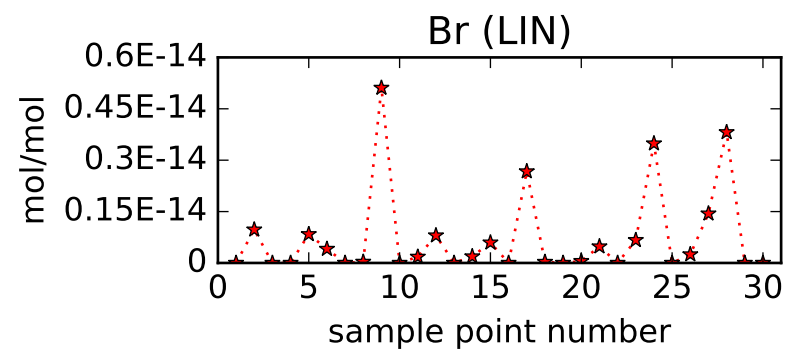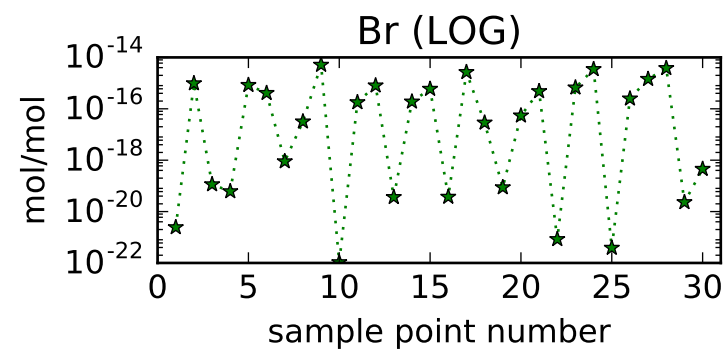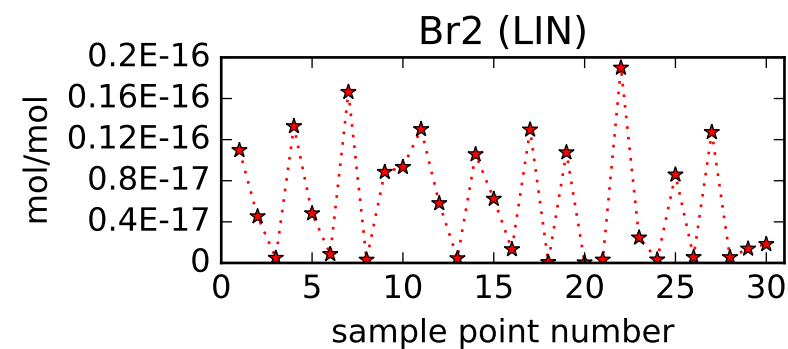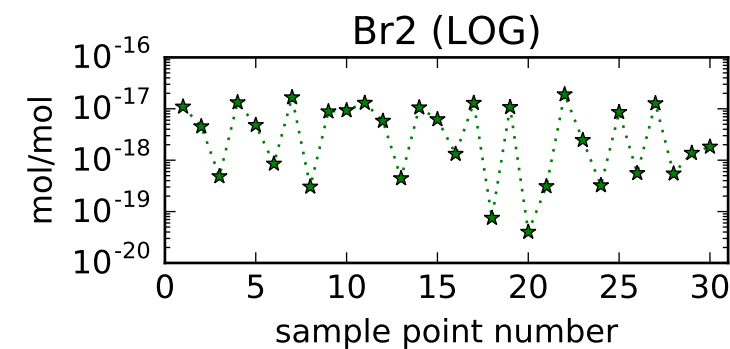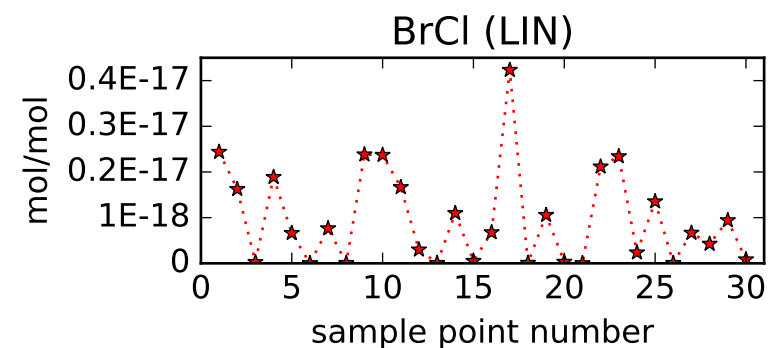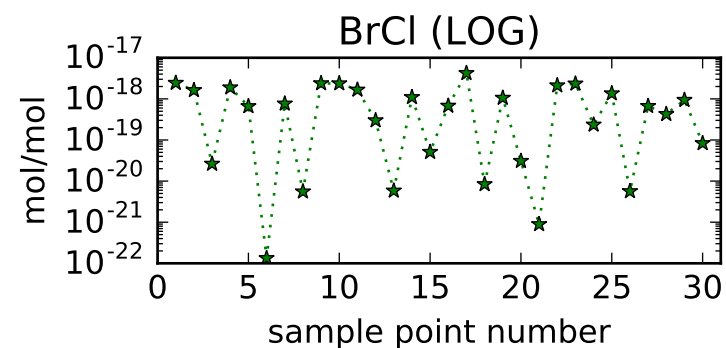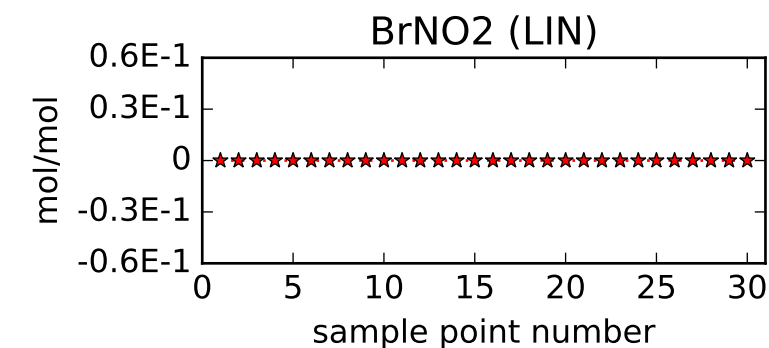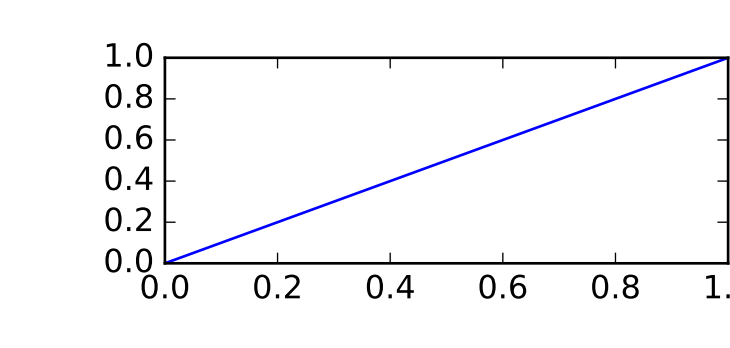

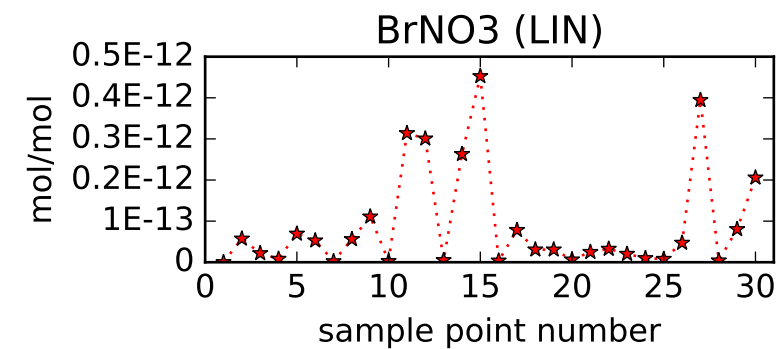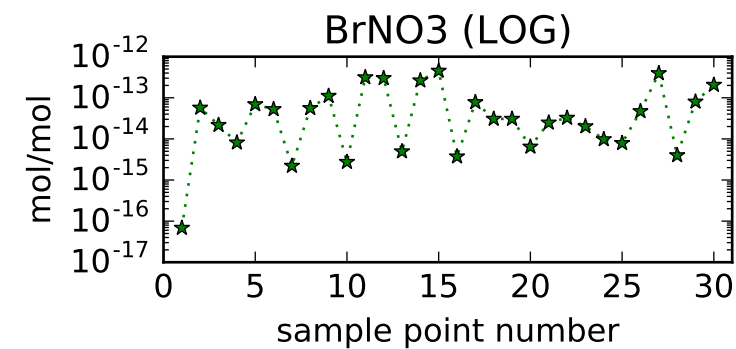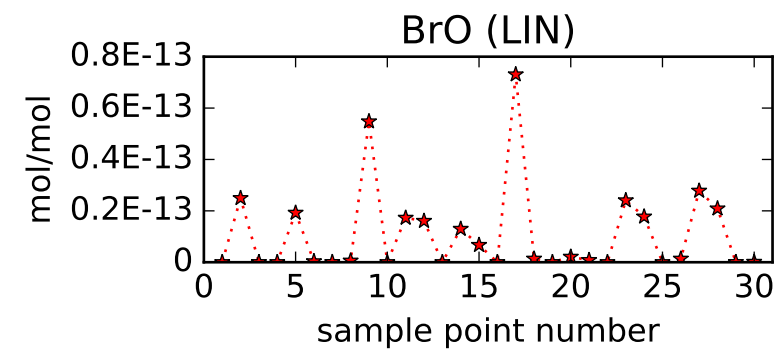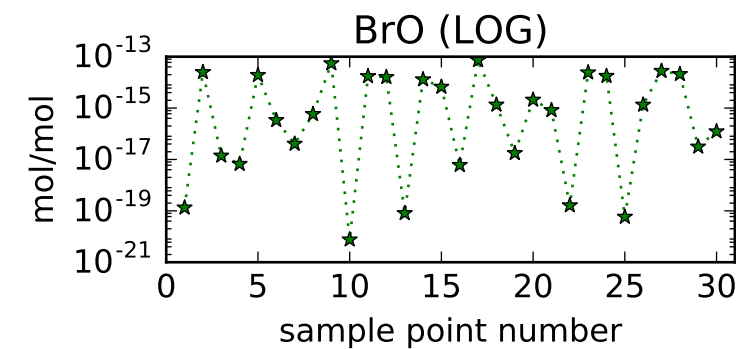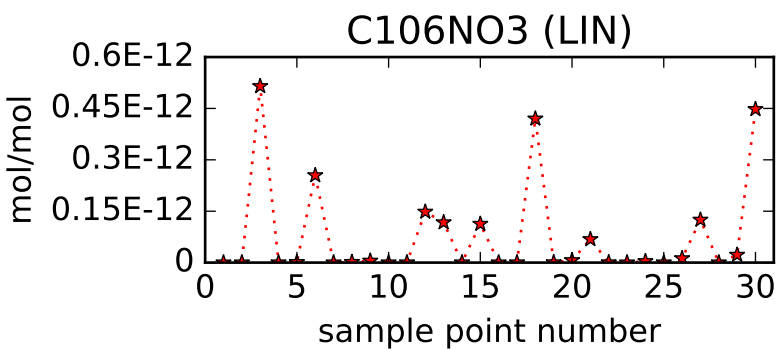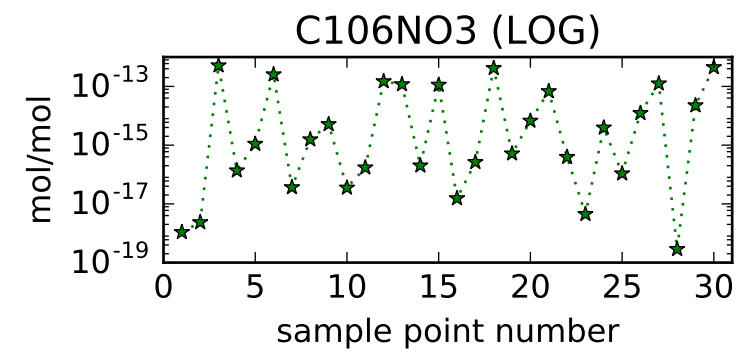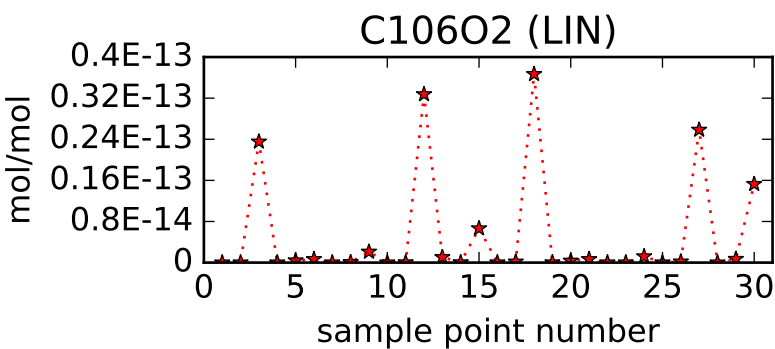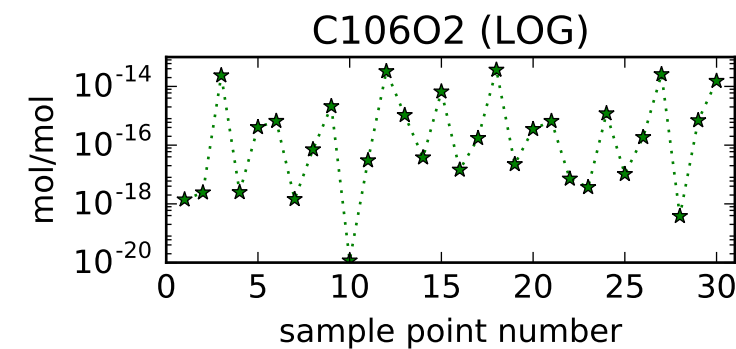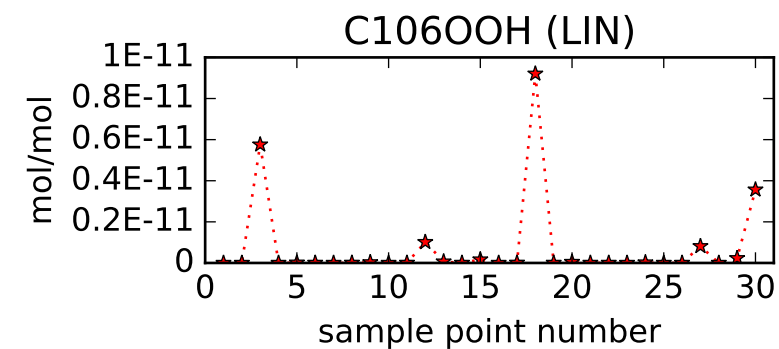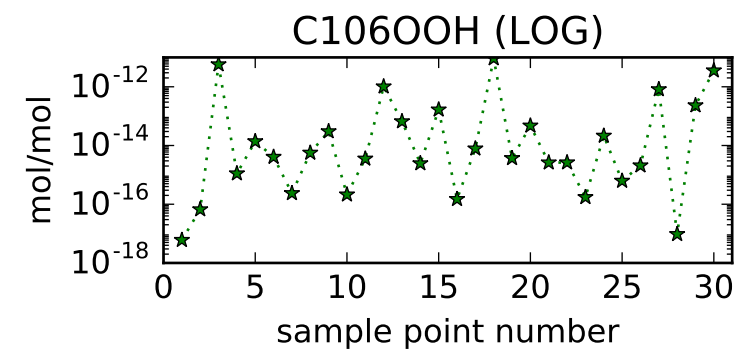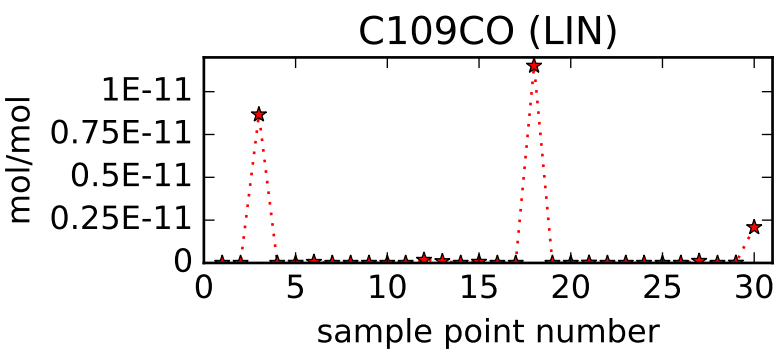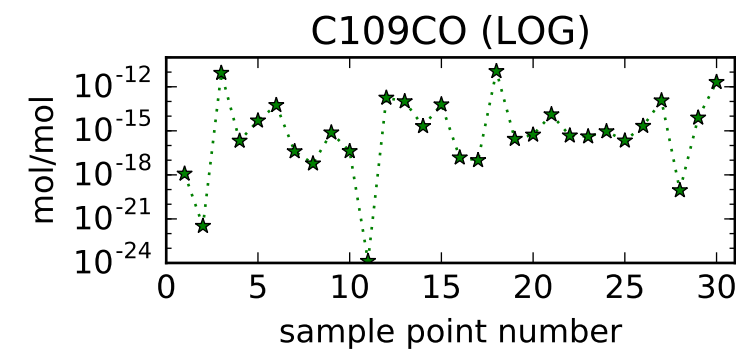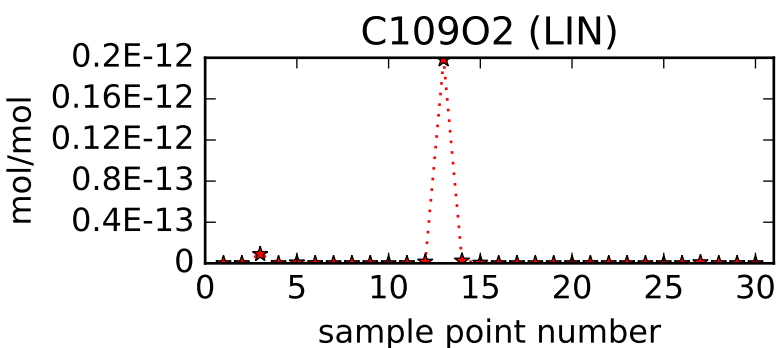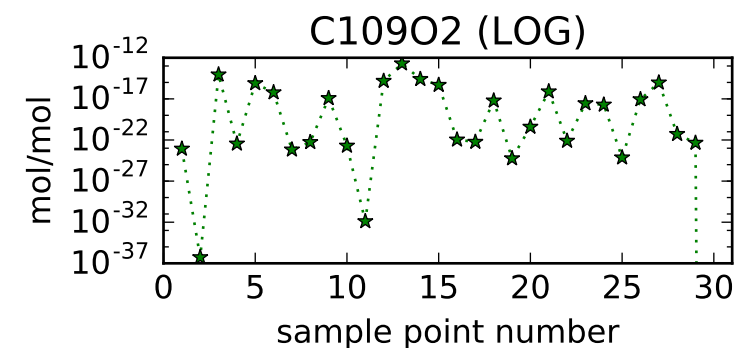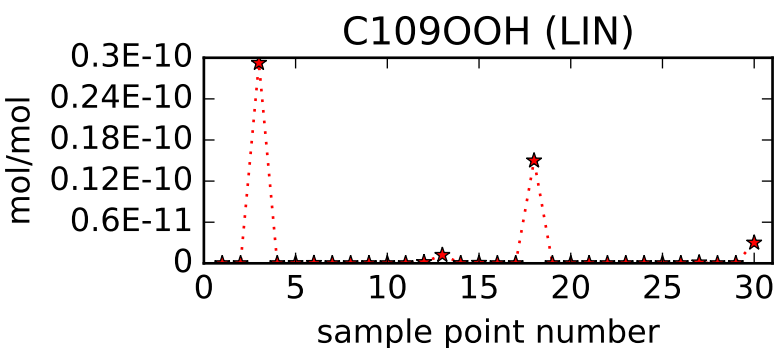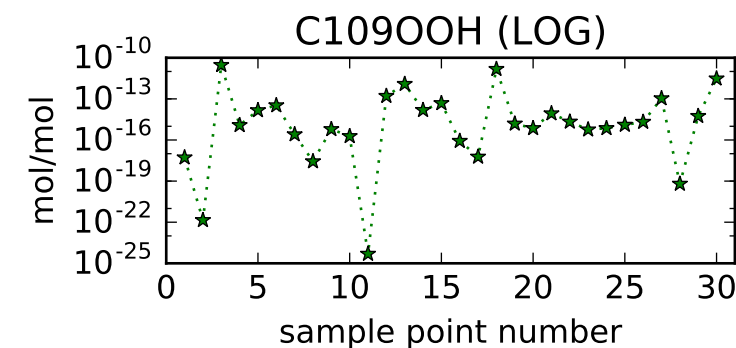

C10PAN2 (LIN)

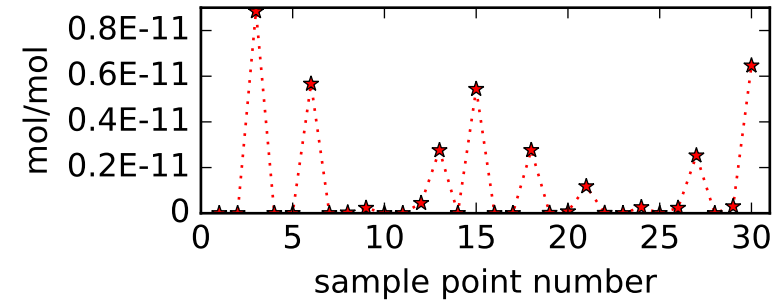

C10PAN2 (LOG)

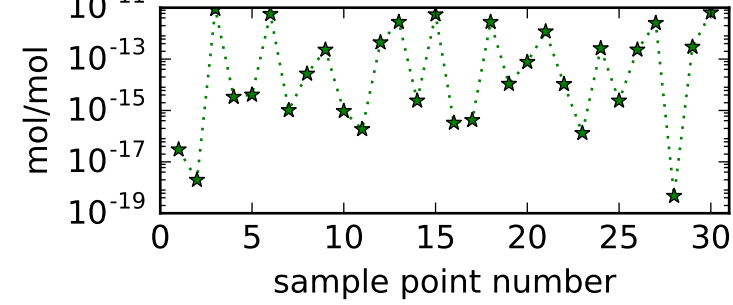

C10DC2O2C4OD (LIN)

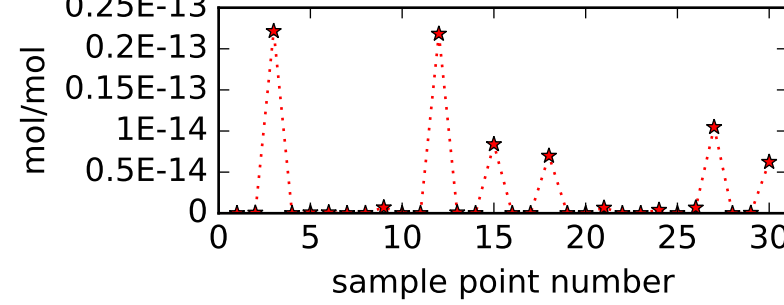

C10DC2O2C4OD (LOG)

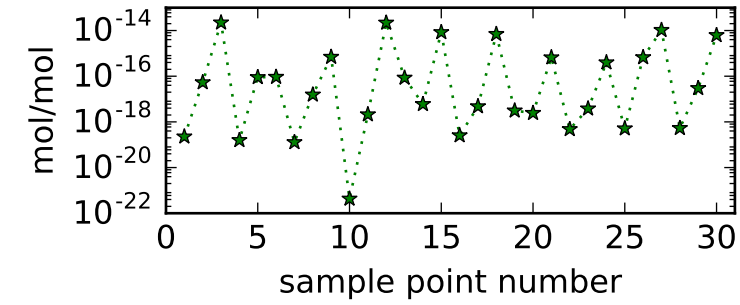

C10DC2O2C4OOH (LIN)

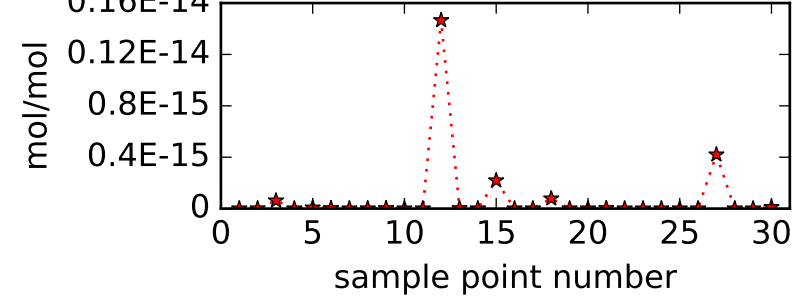

C10DC2O2C4OOH (LOG)

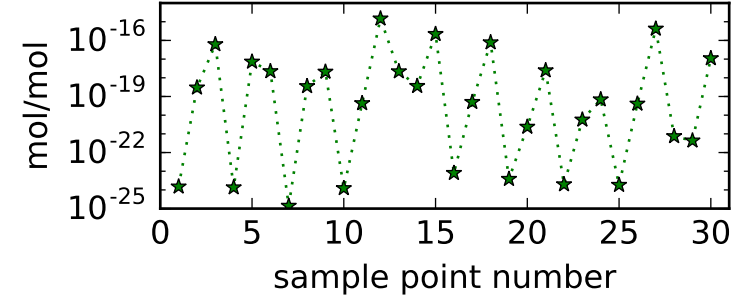

C10DC2OOHC4OD (LIN)

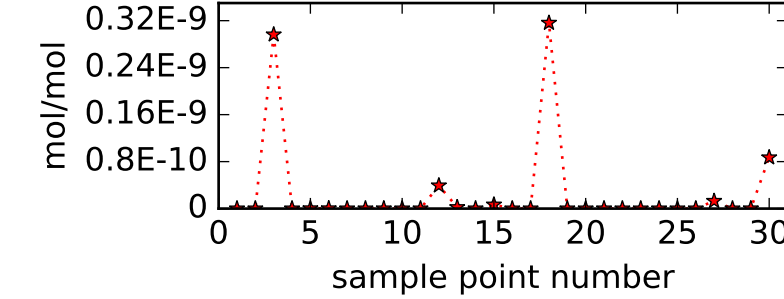

C10DC2OOHC4OD (LOG)

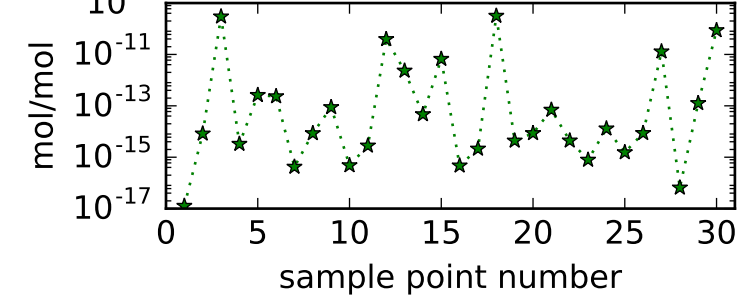

C10DC3O2C4OOH (LIN)

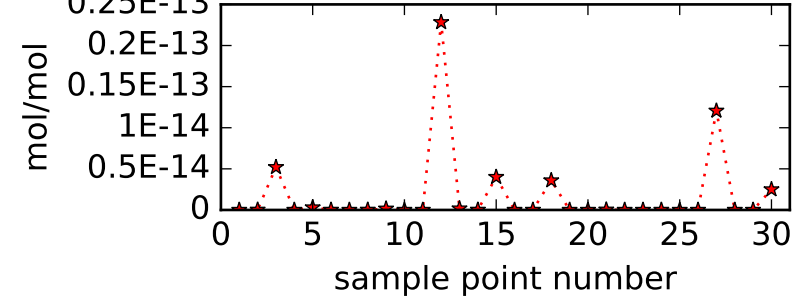

C10DC3O2C4OOH (LOG)

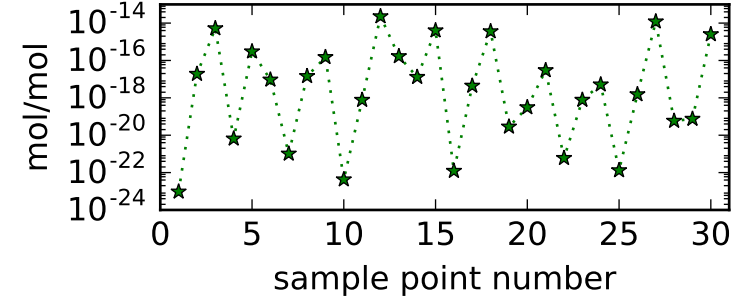

C10OHC2O2C4OD (LIN)

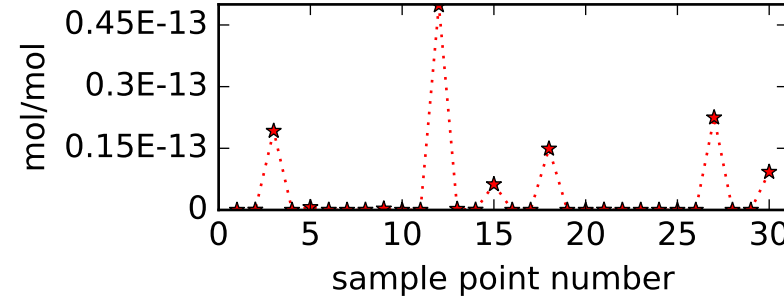

C10OHC2O2C4OD (LOG)

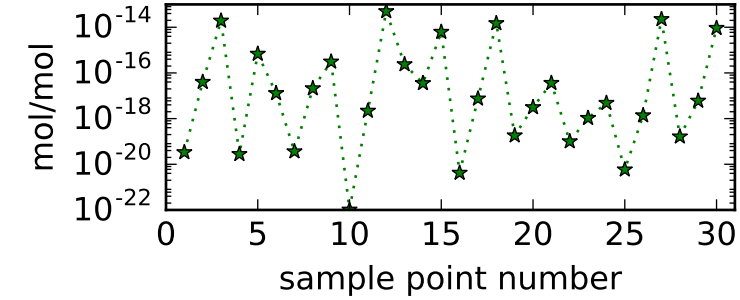

C10OHC2OOHC4OD (LIN)

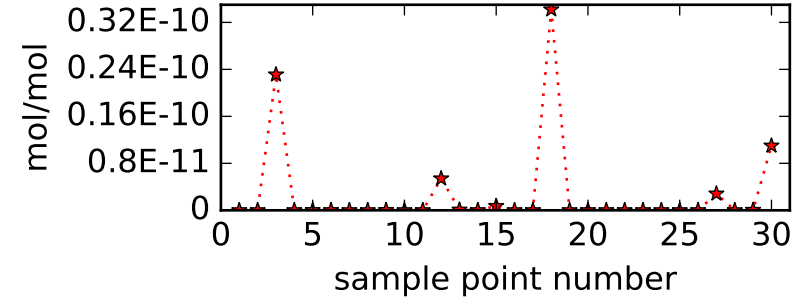

C10OHC2OOHC4OD (LOG)

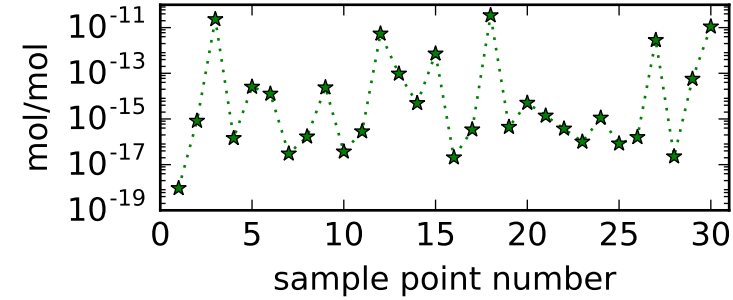

C10OHC3O2C4OD (LIN)

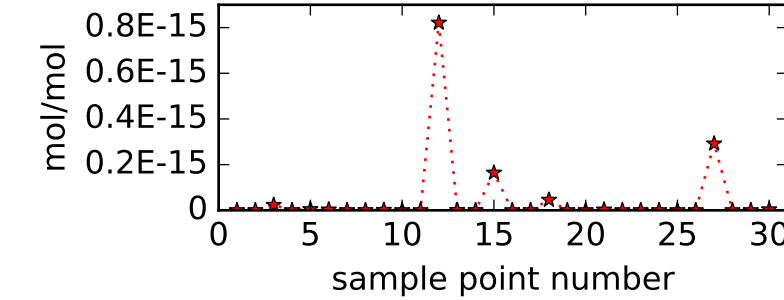

C10OHC3O2C4OD (LOG)

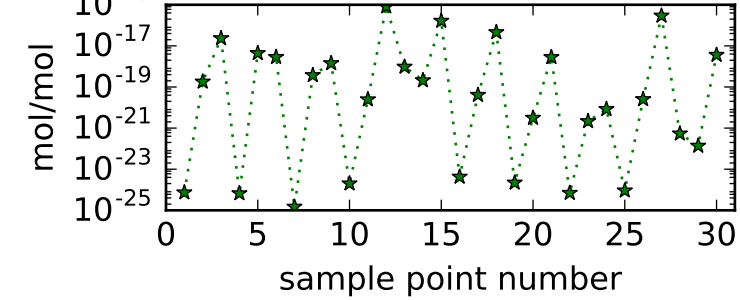



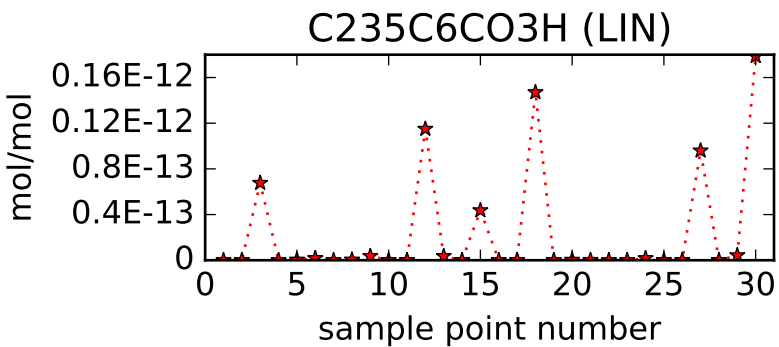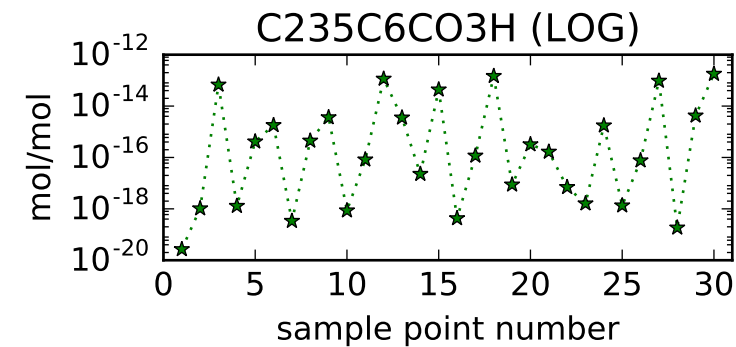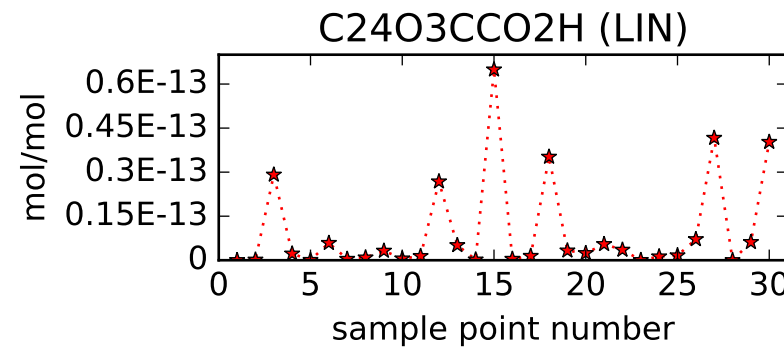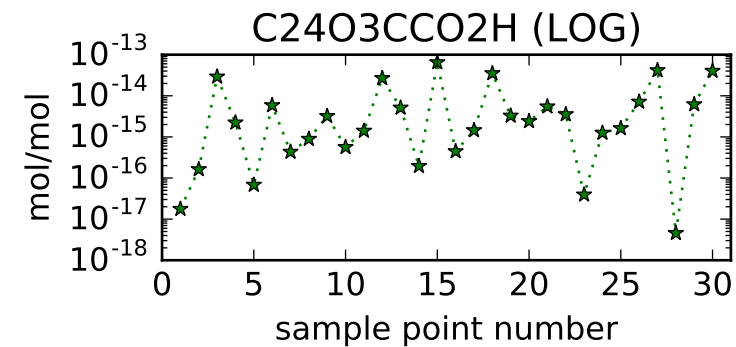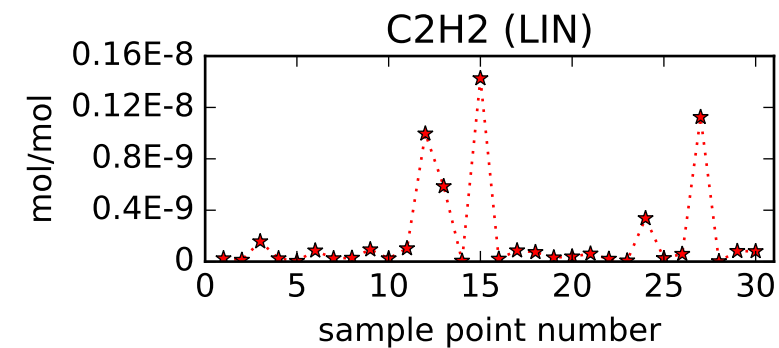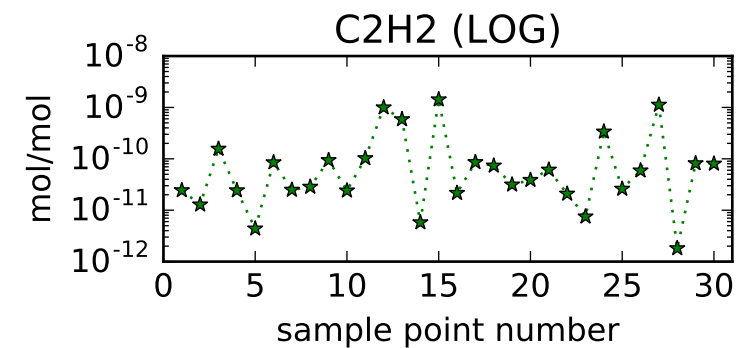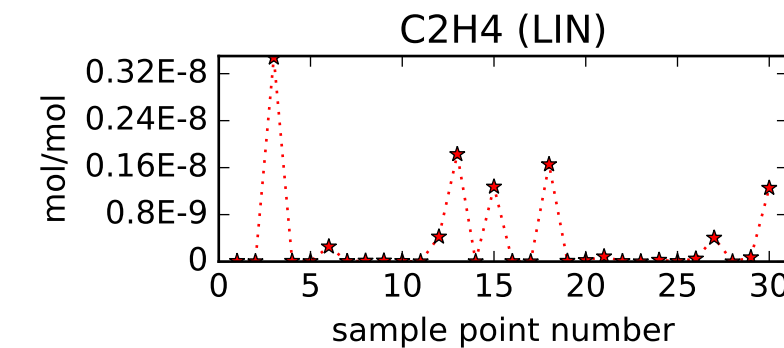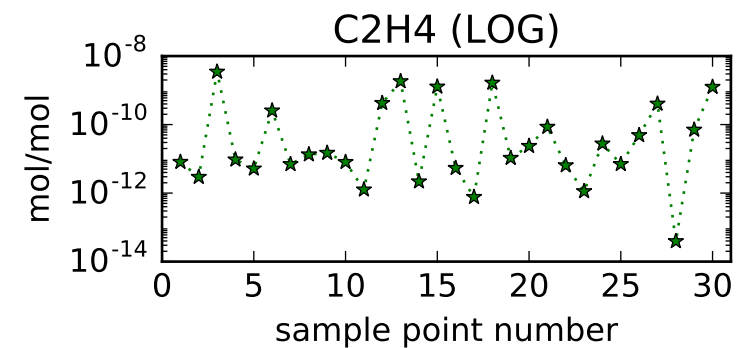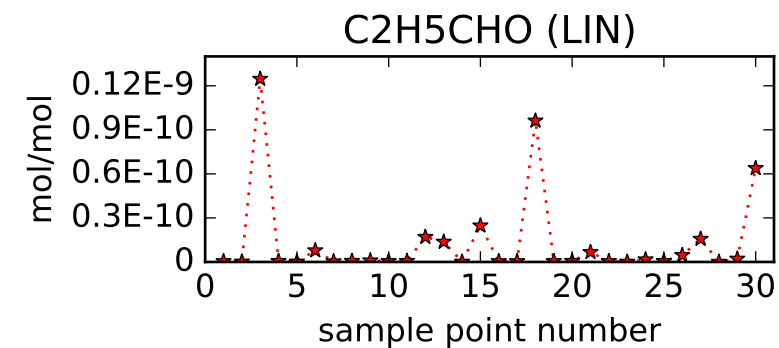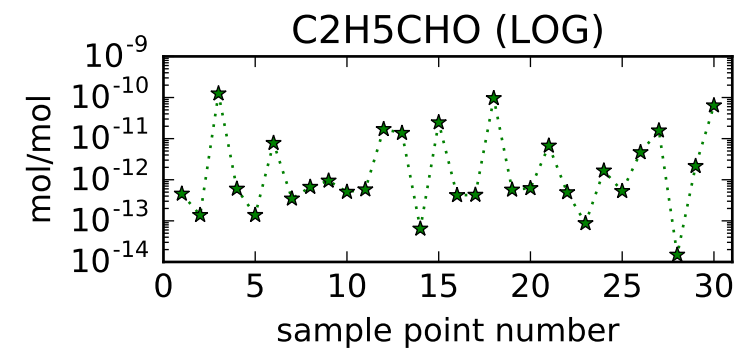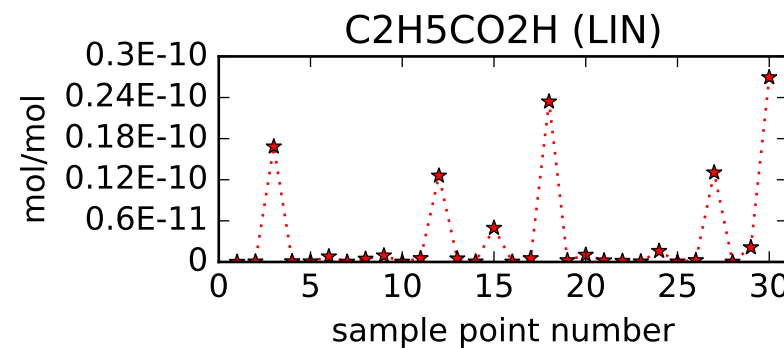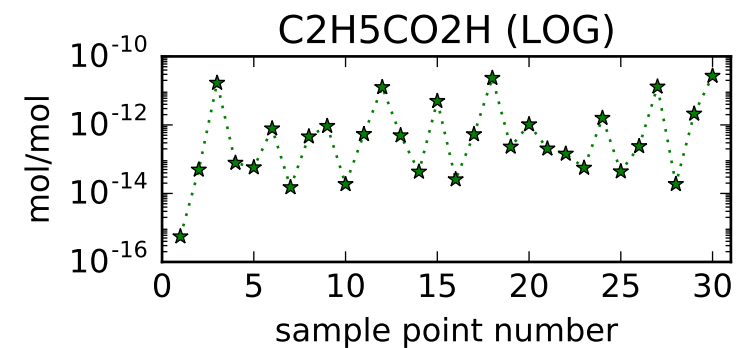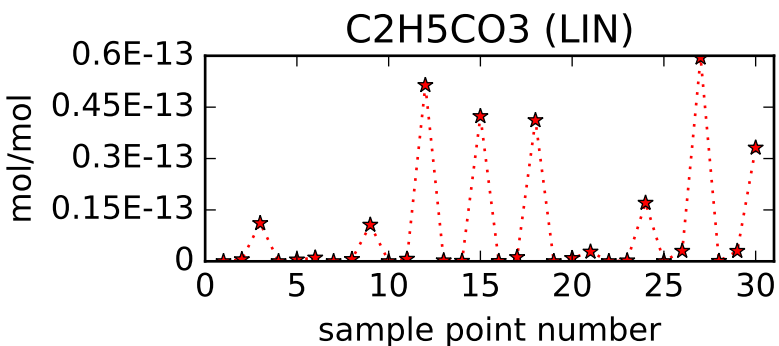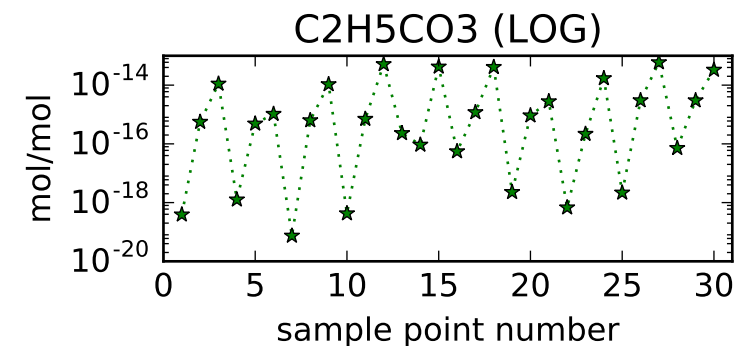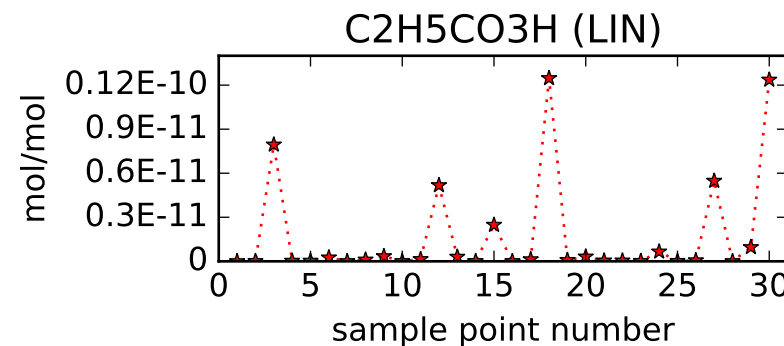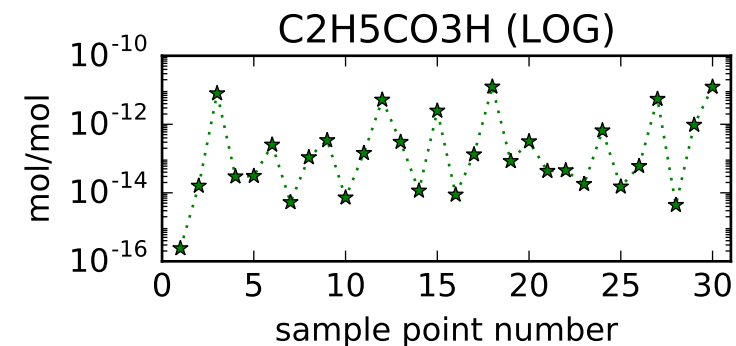

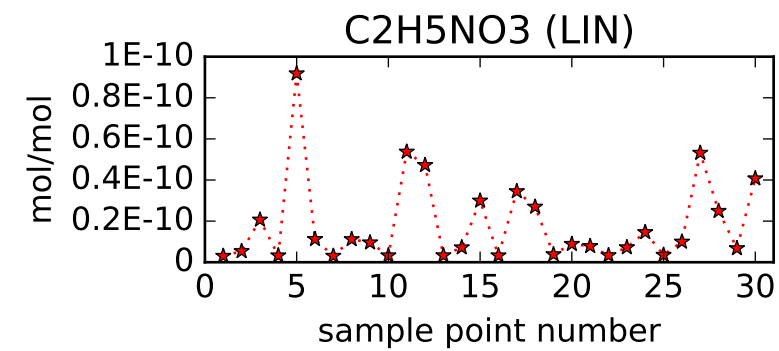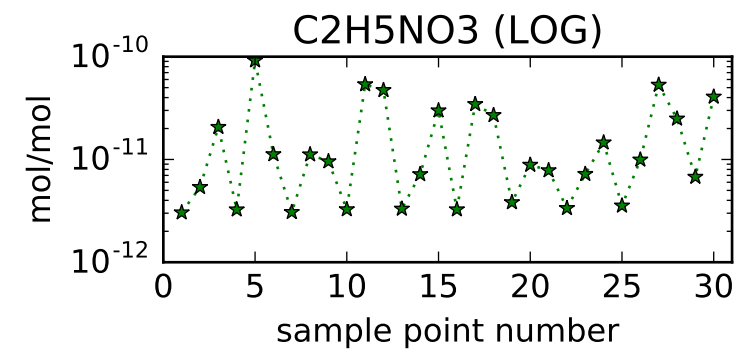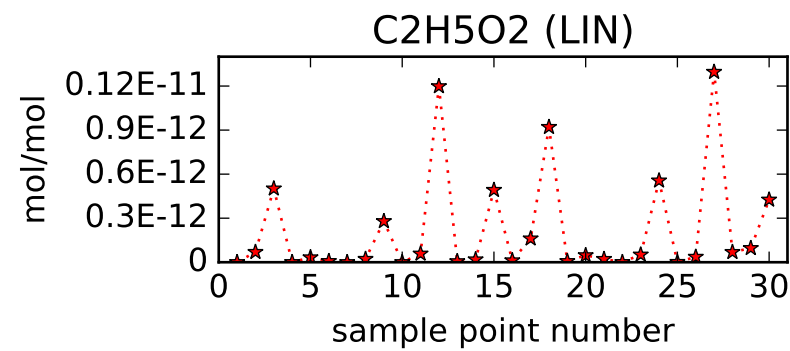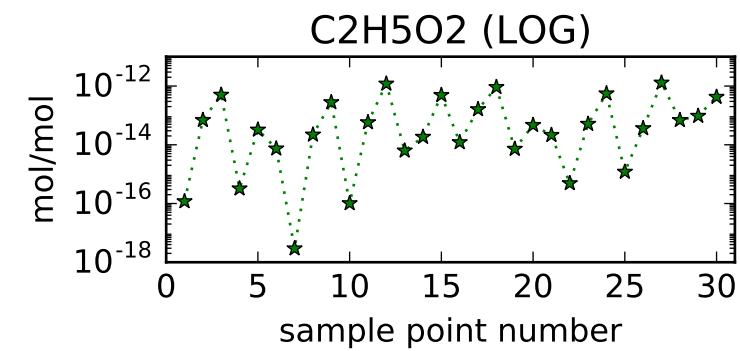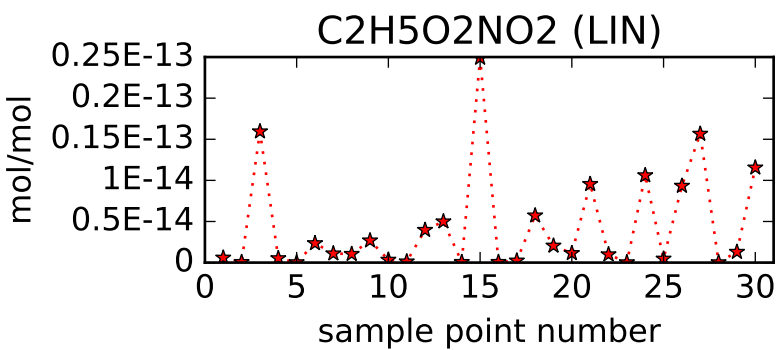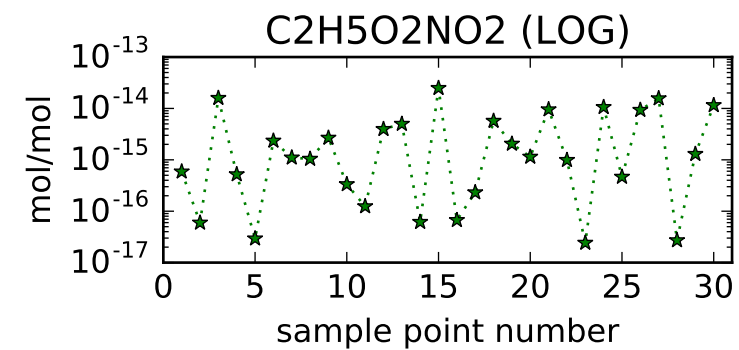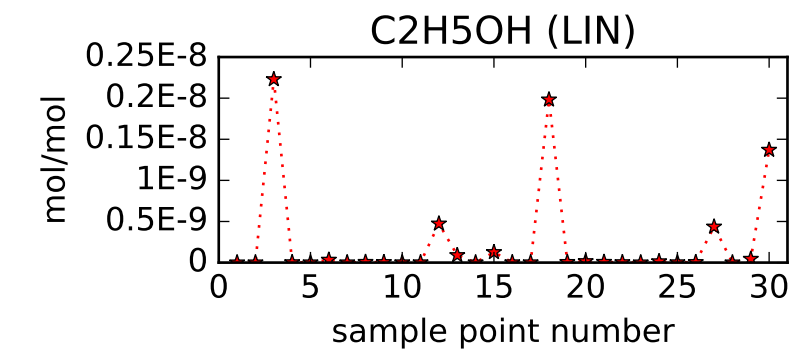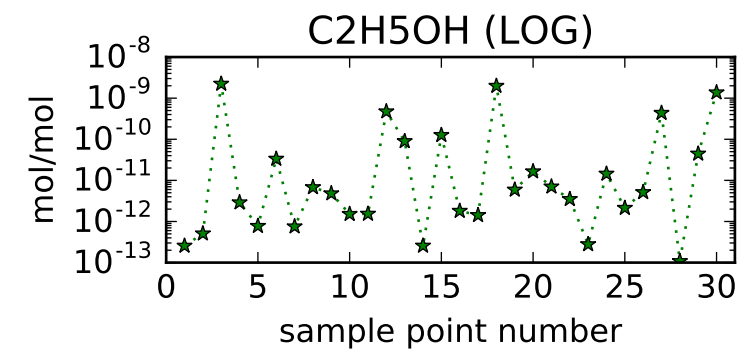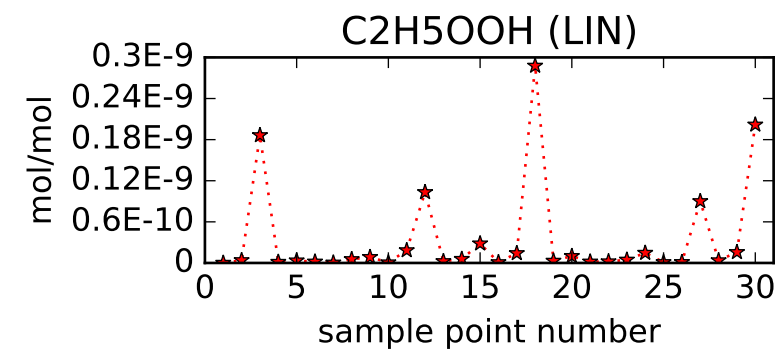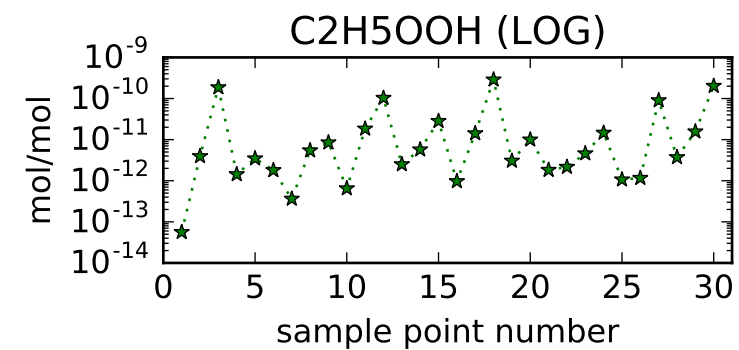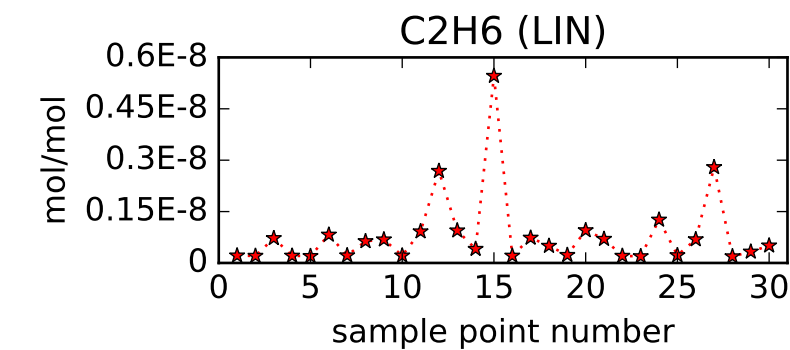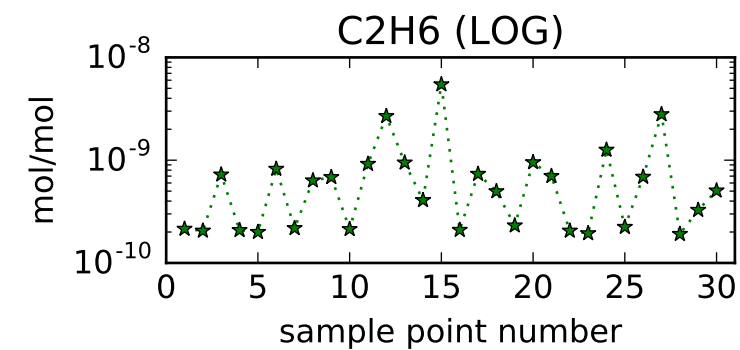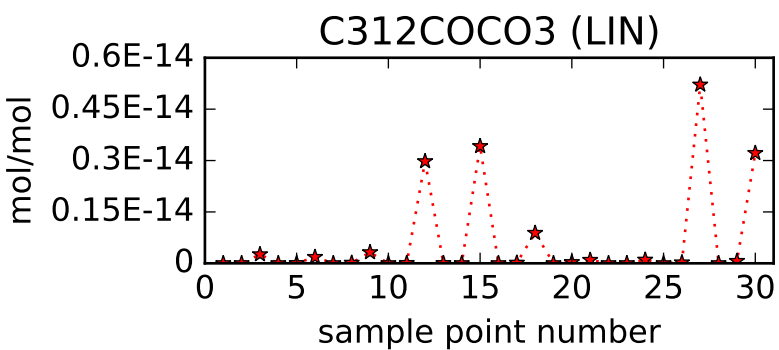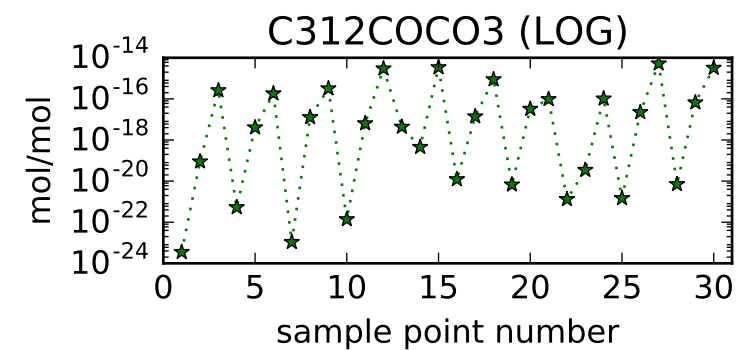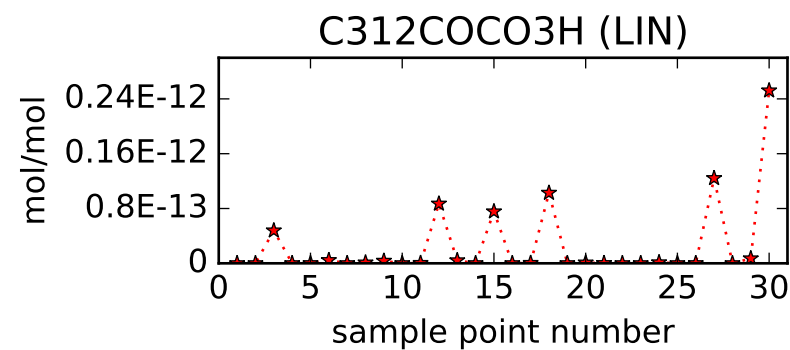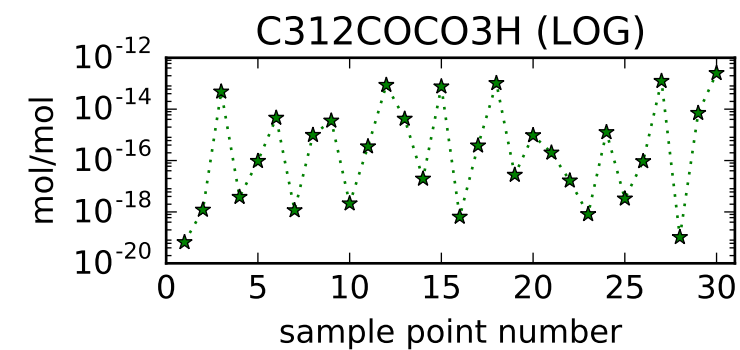

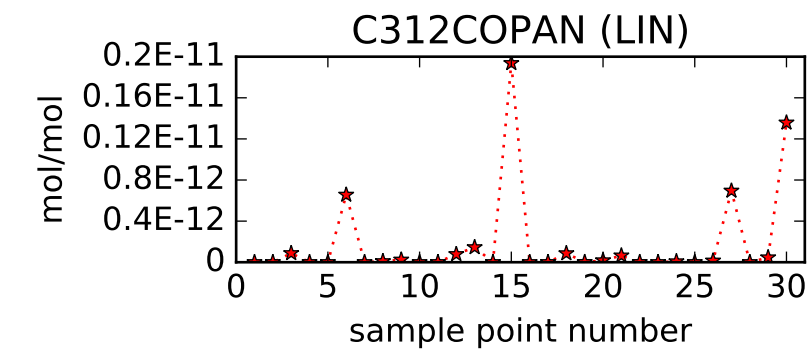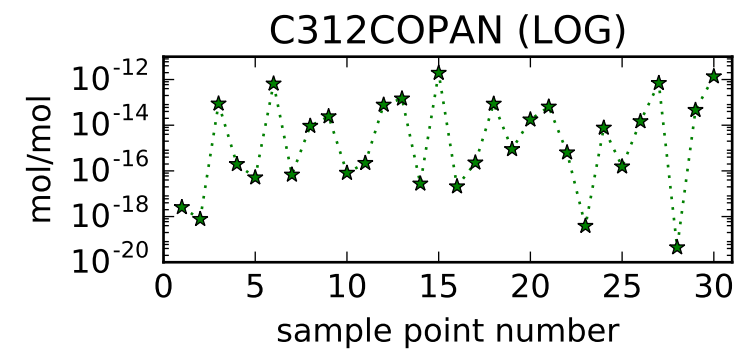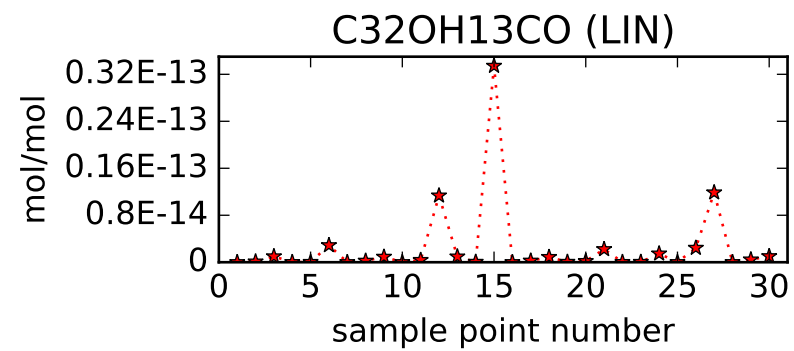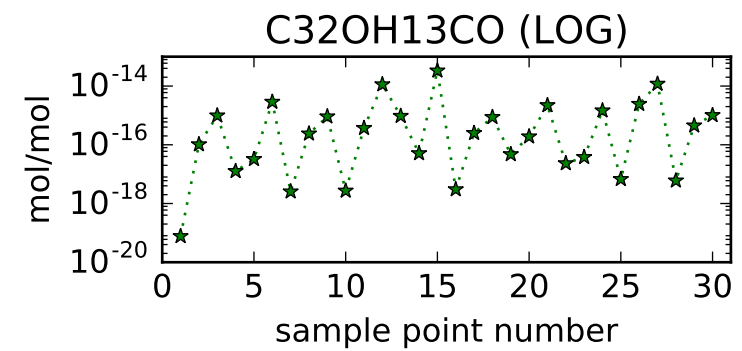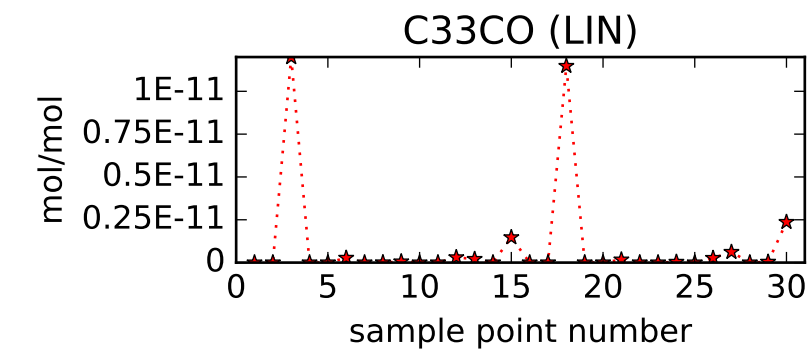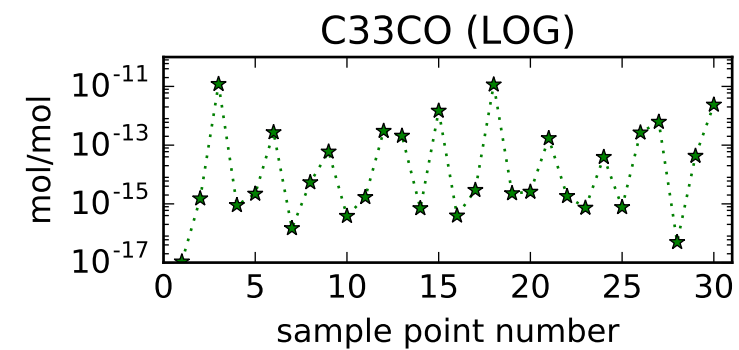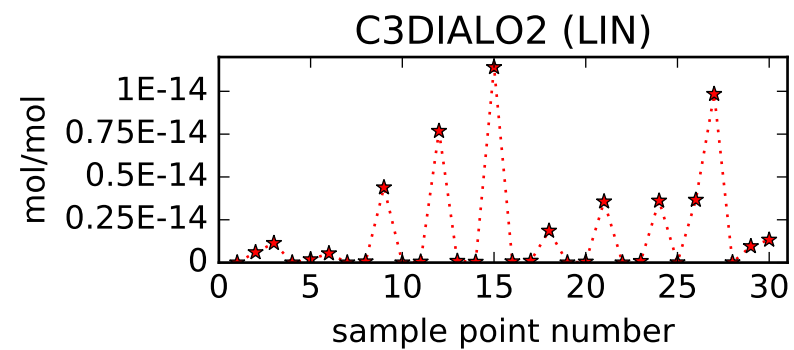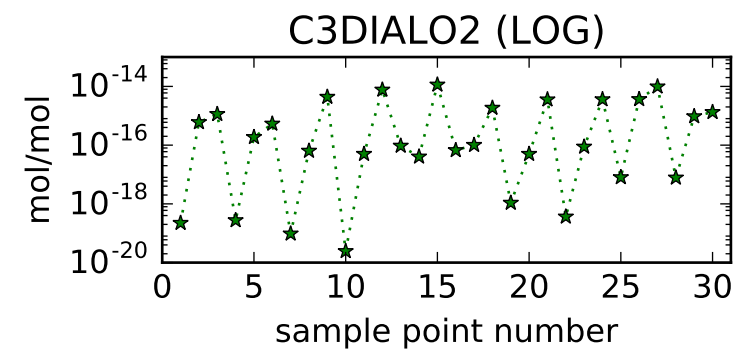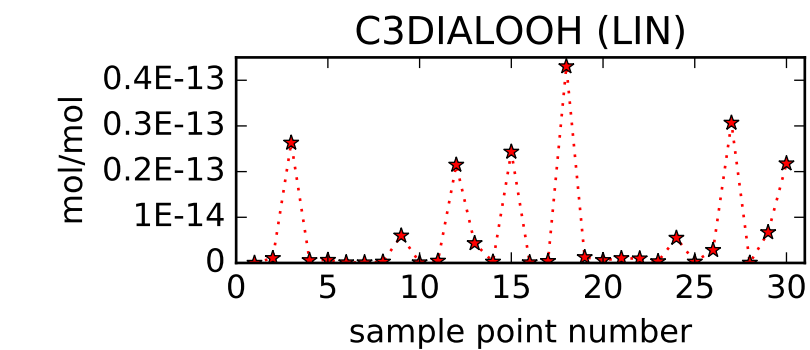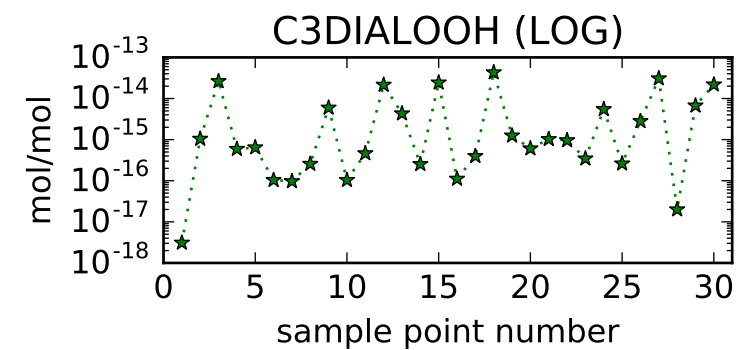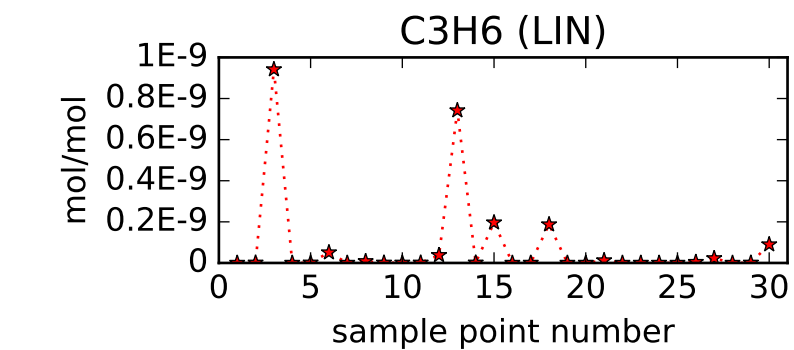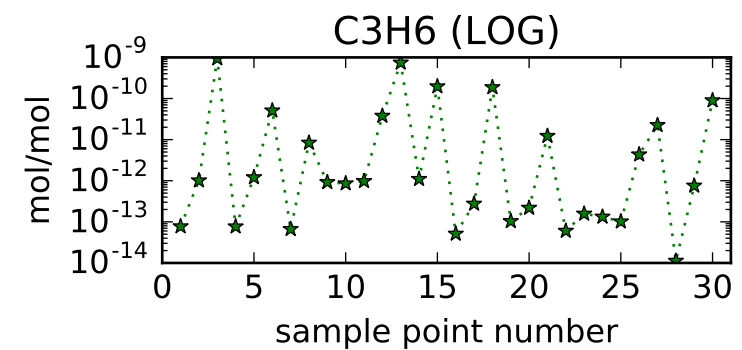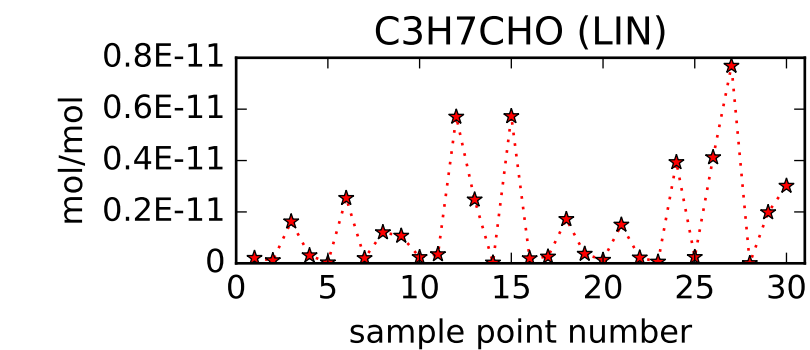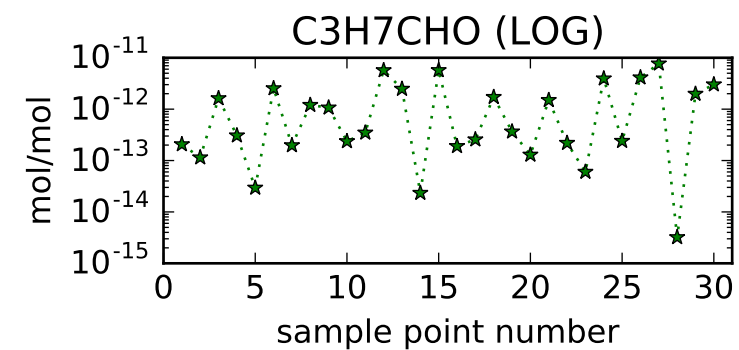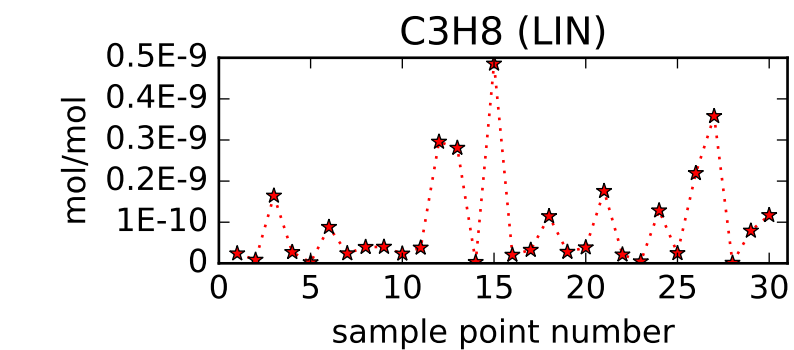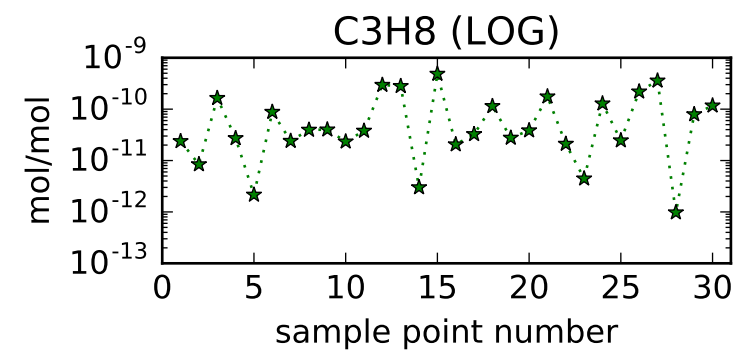

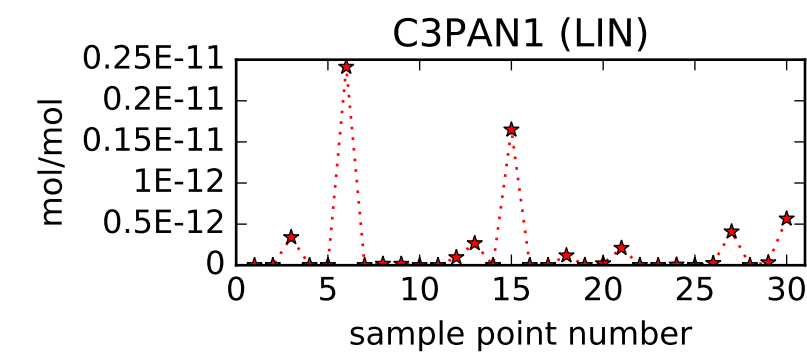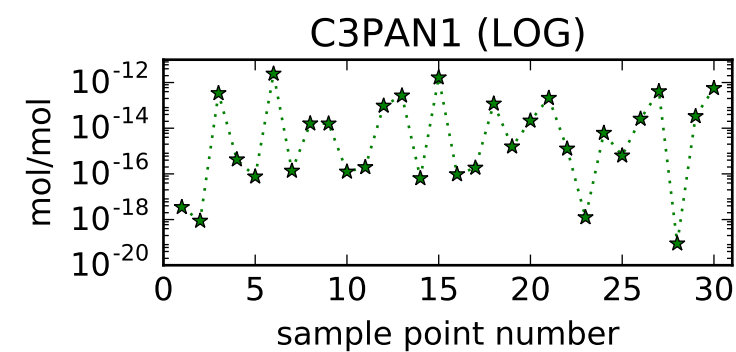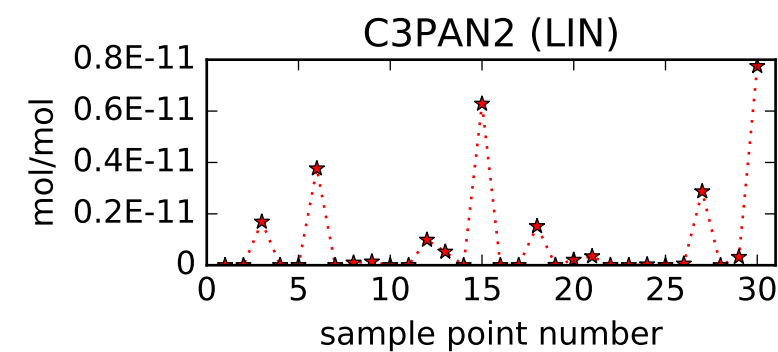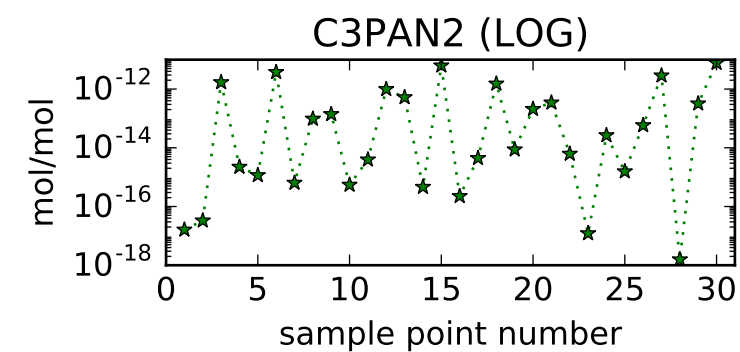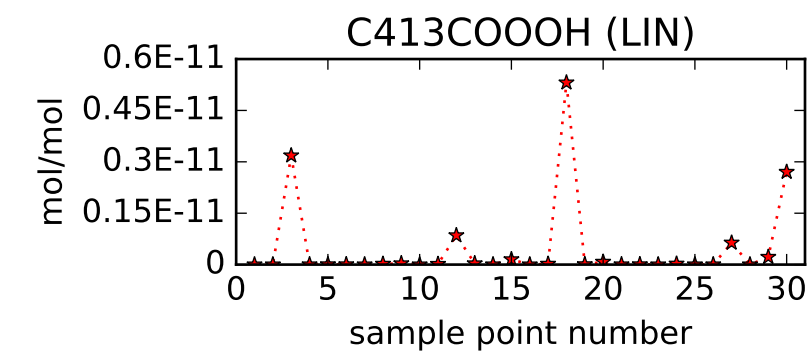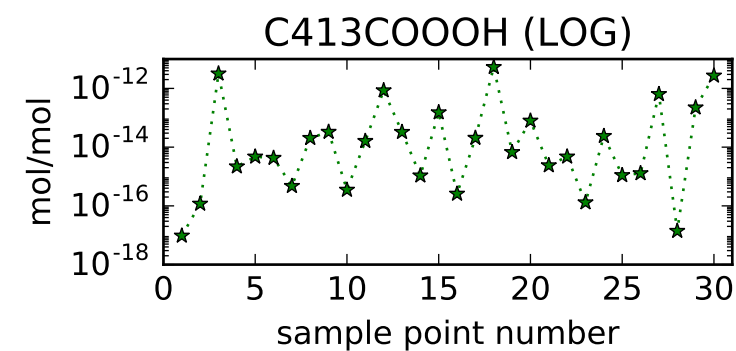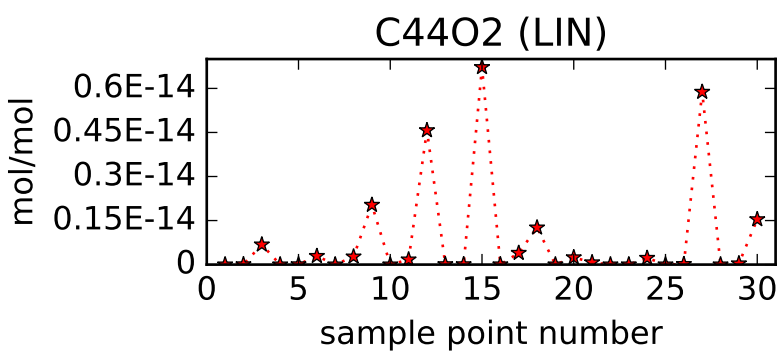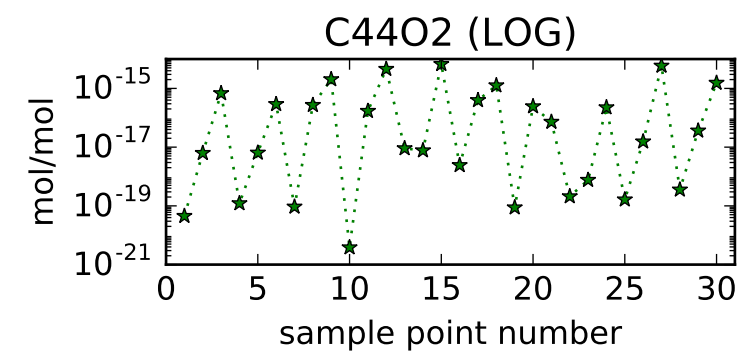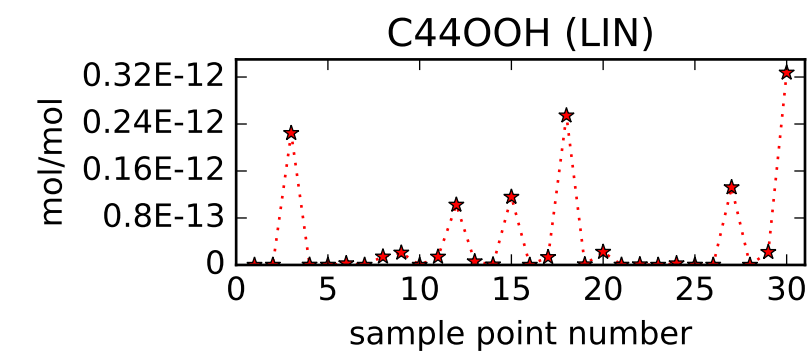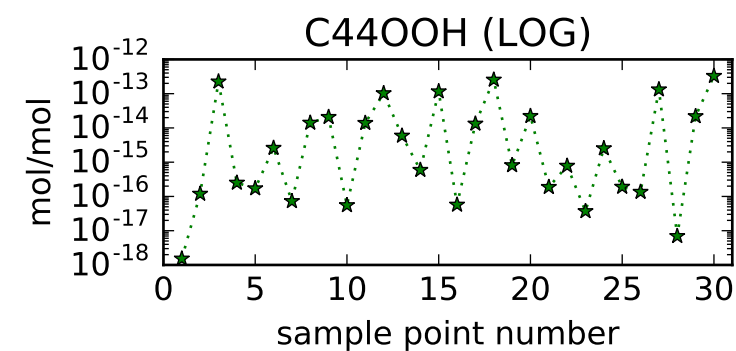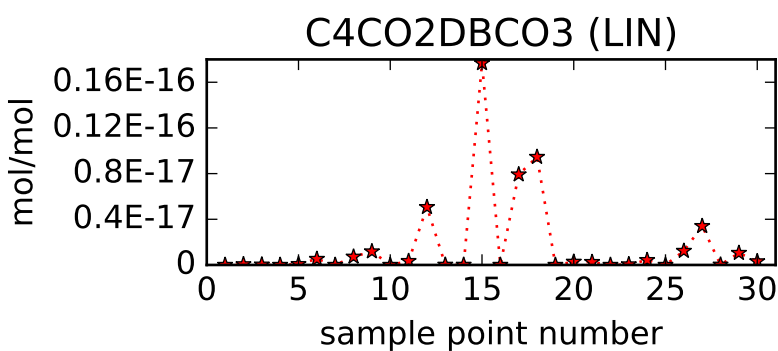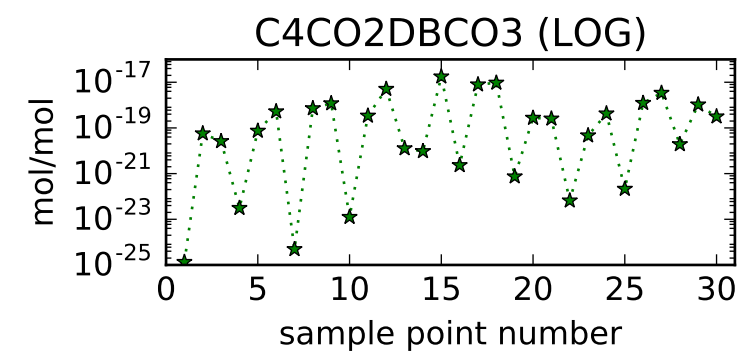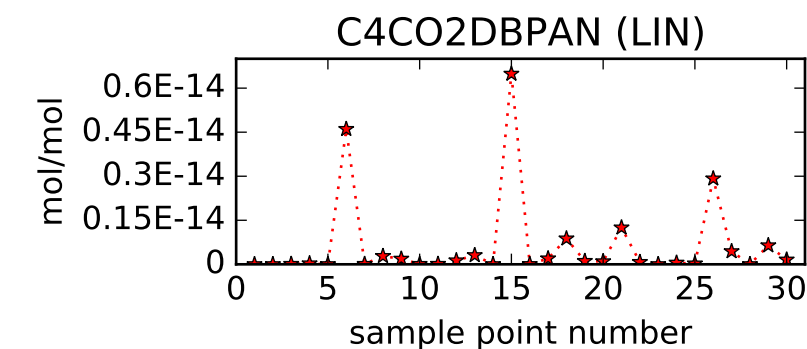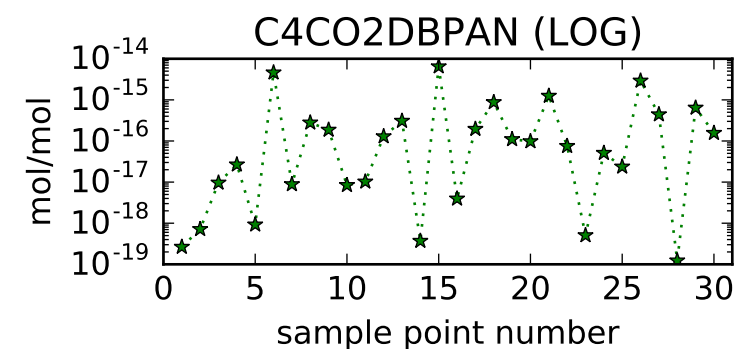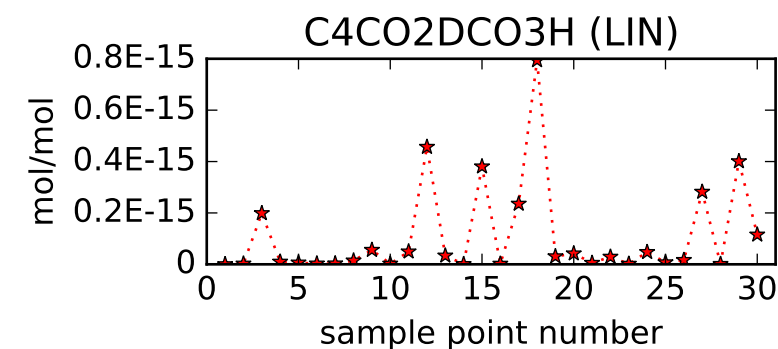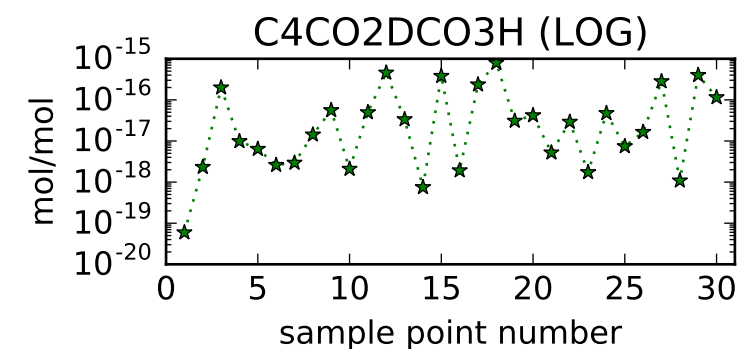

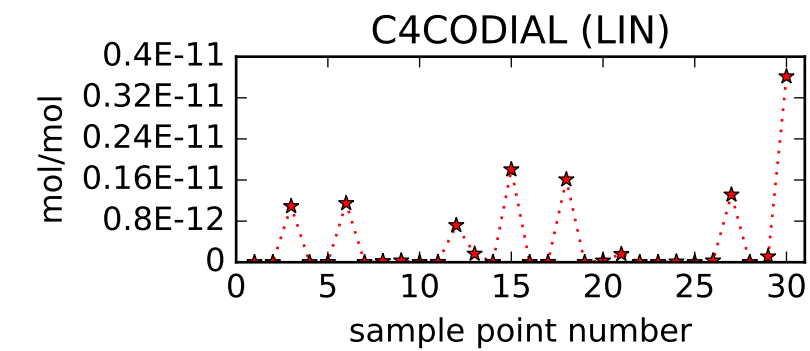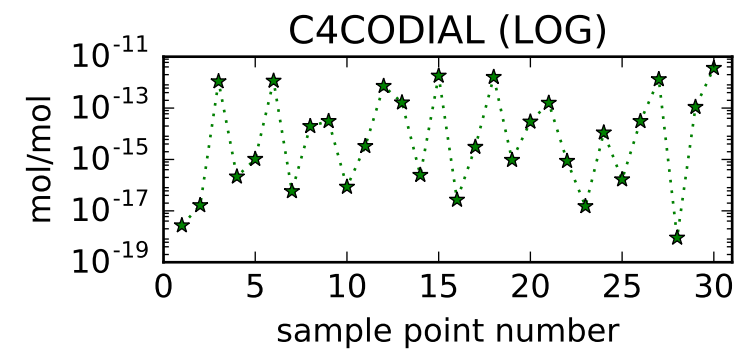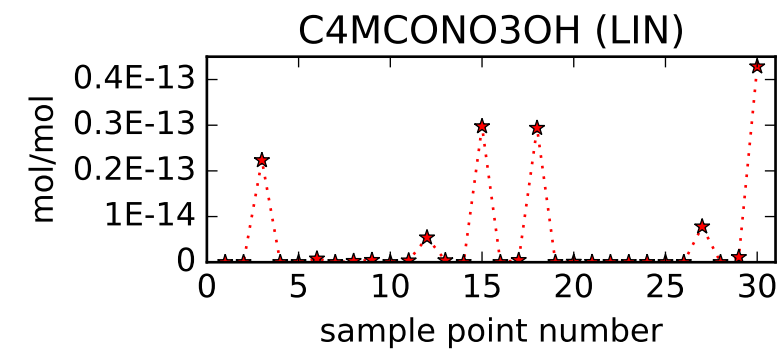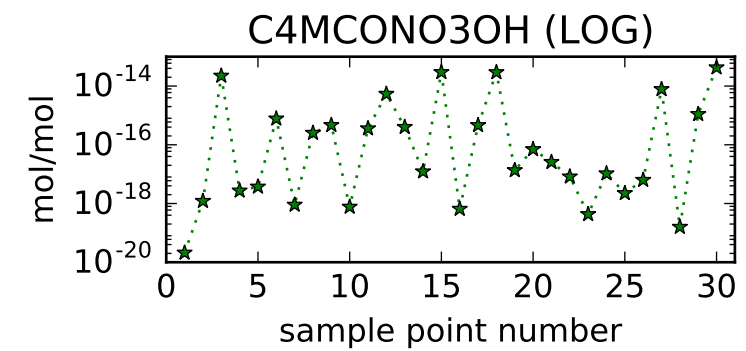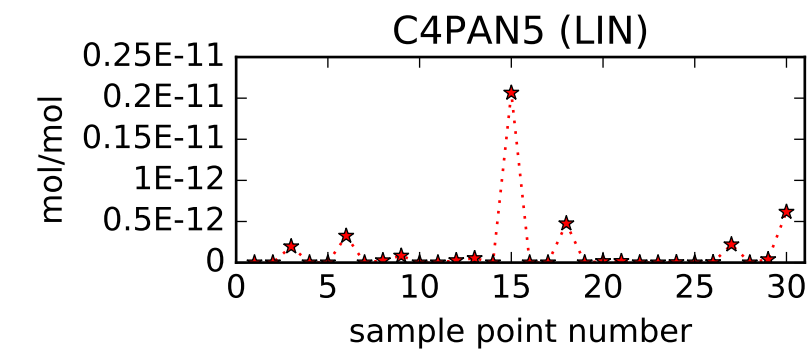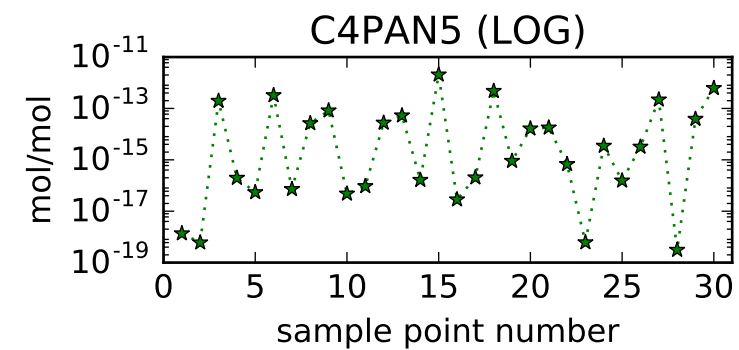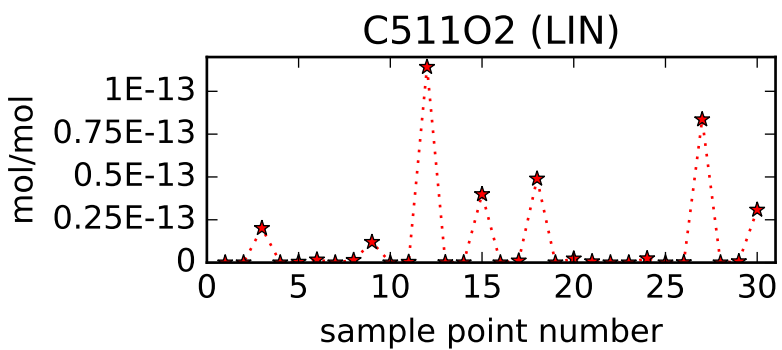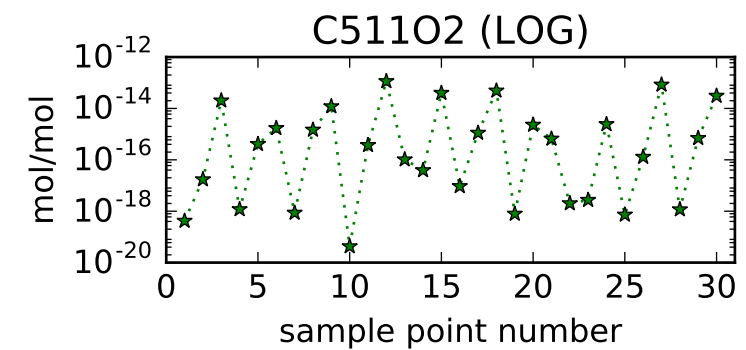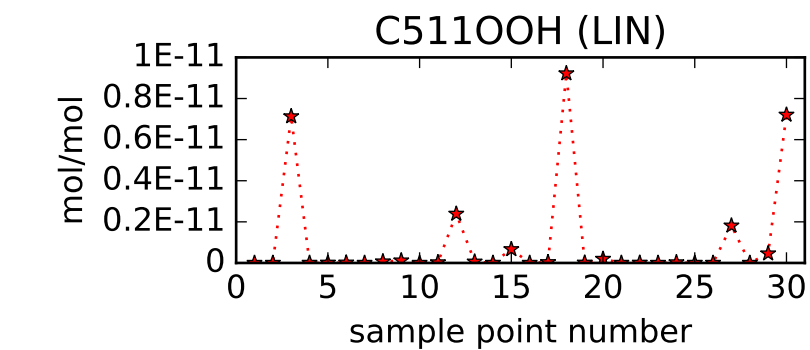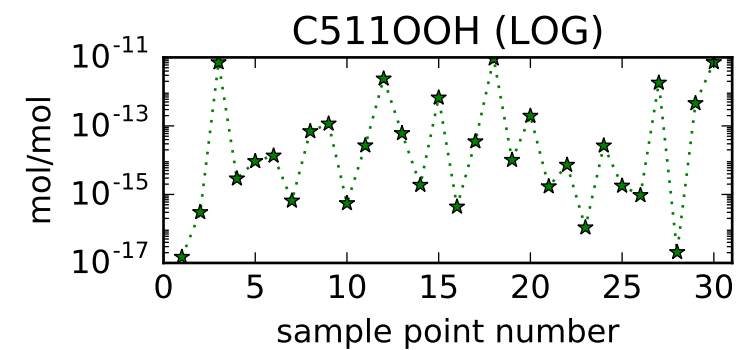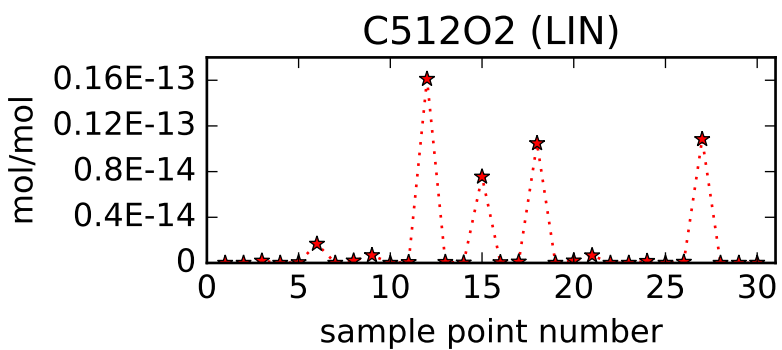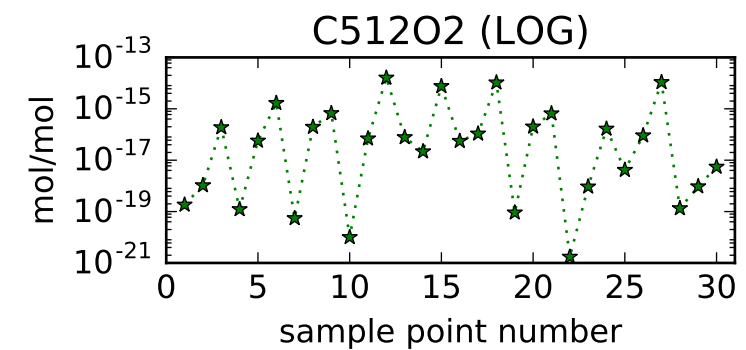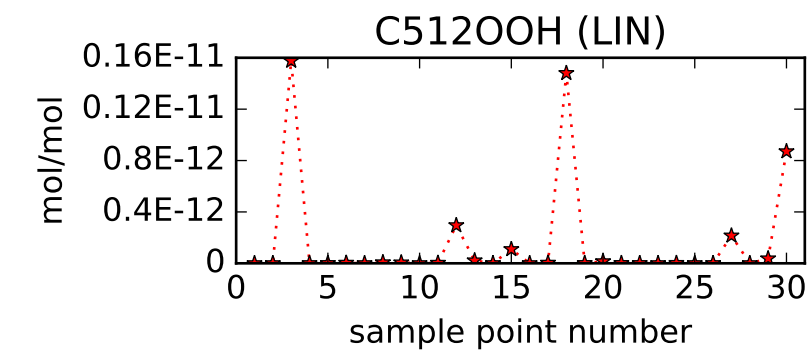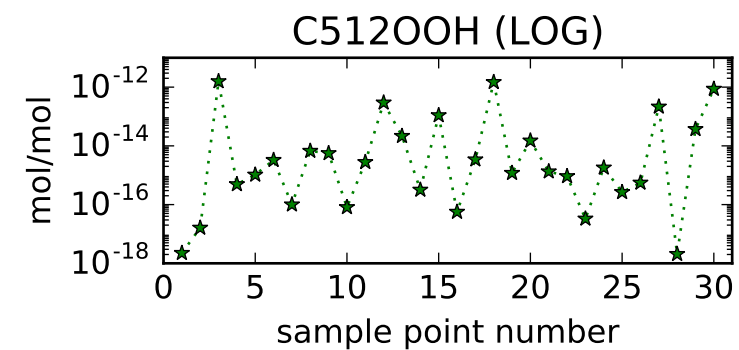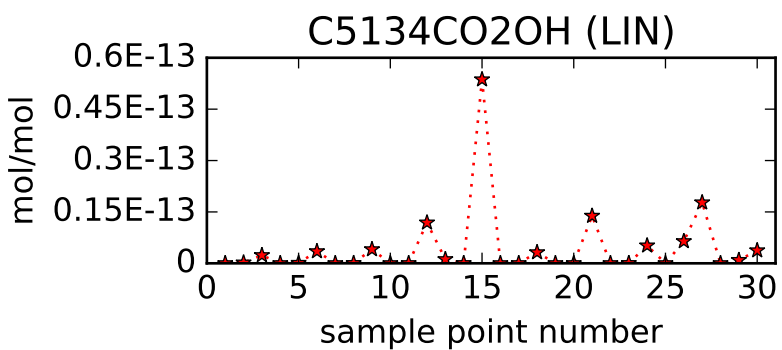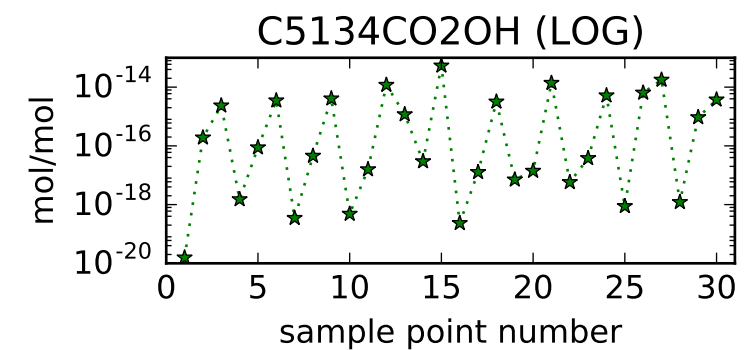



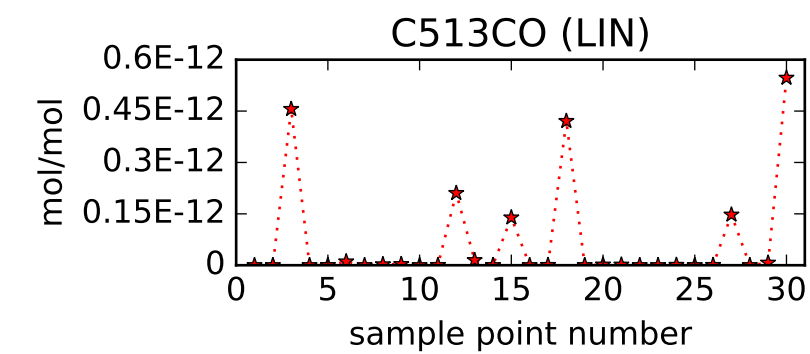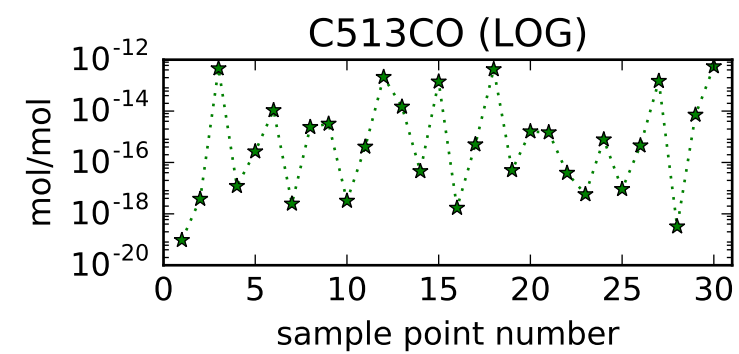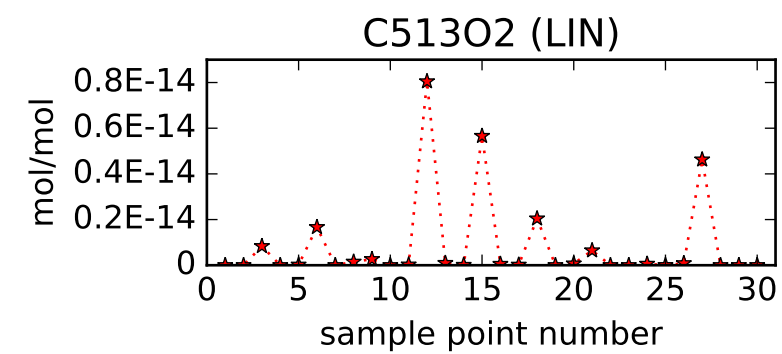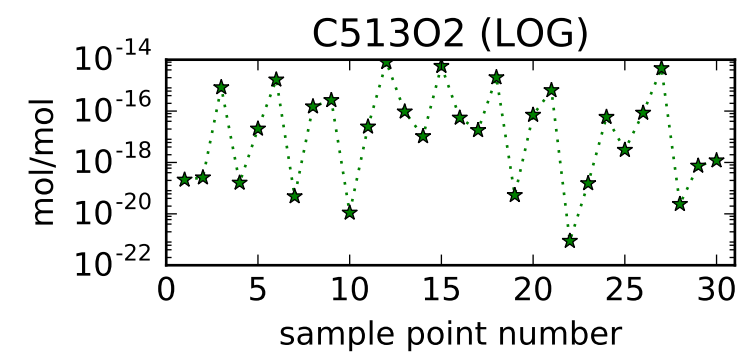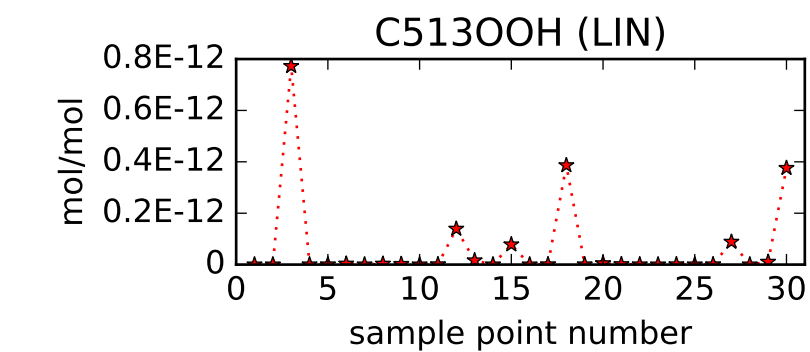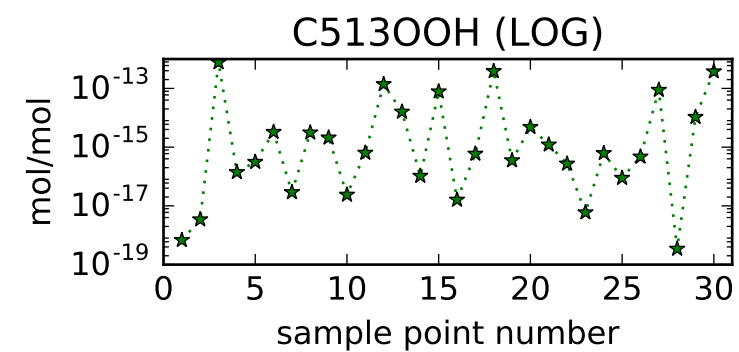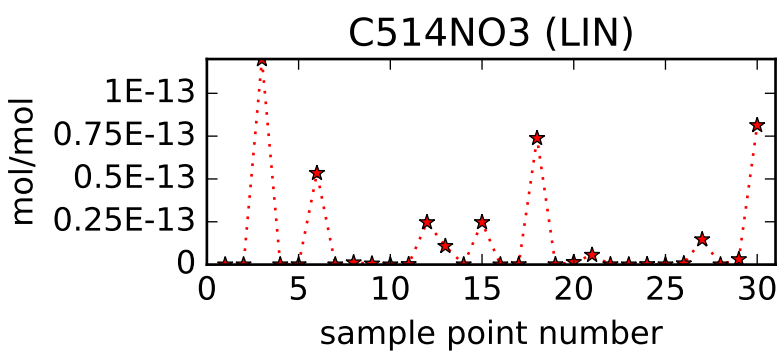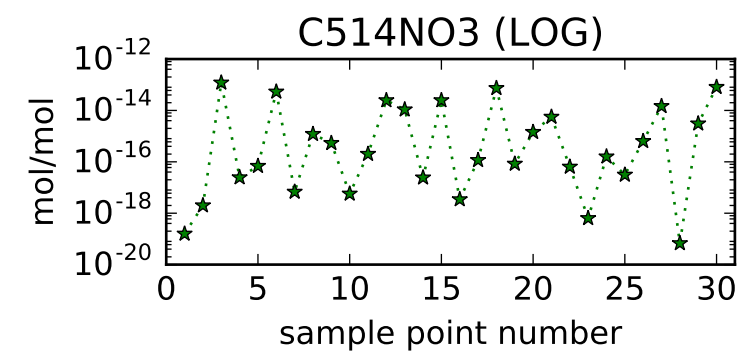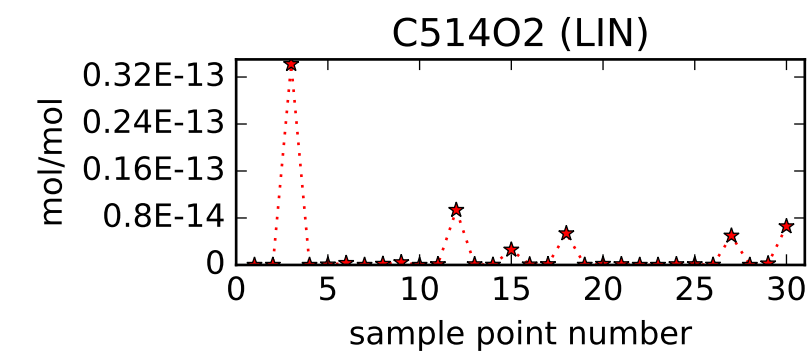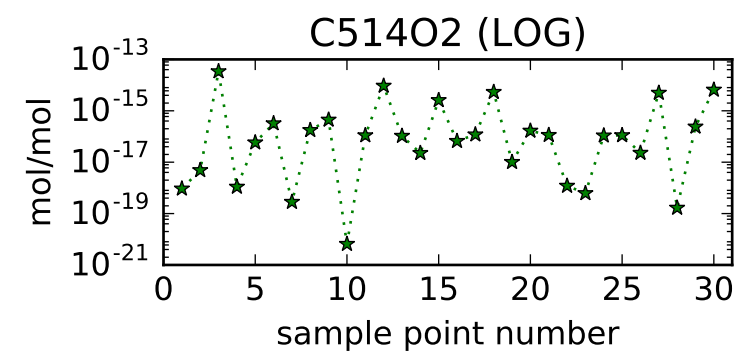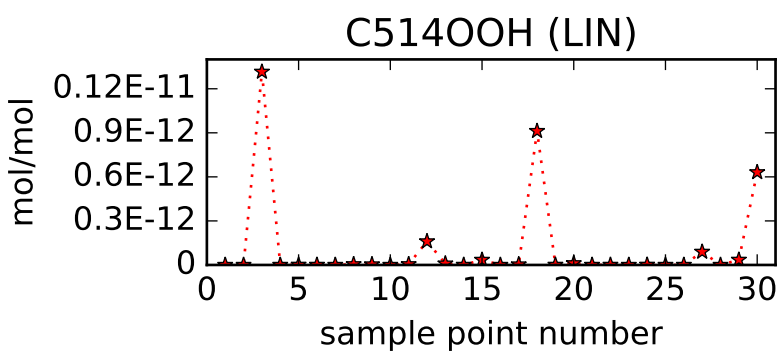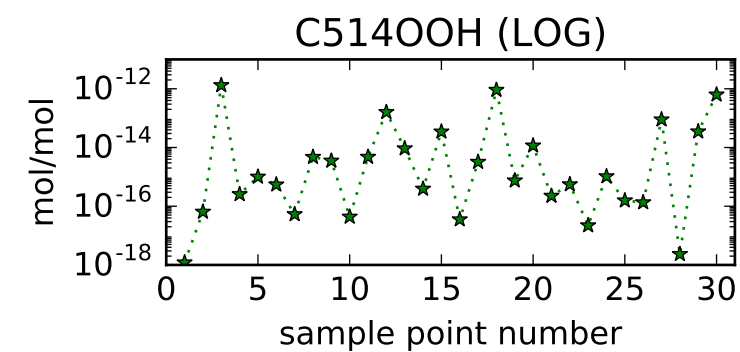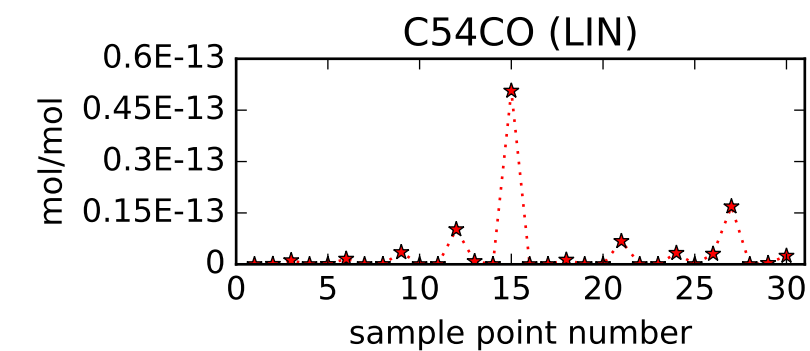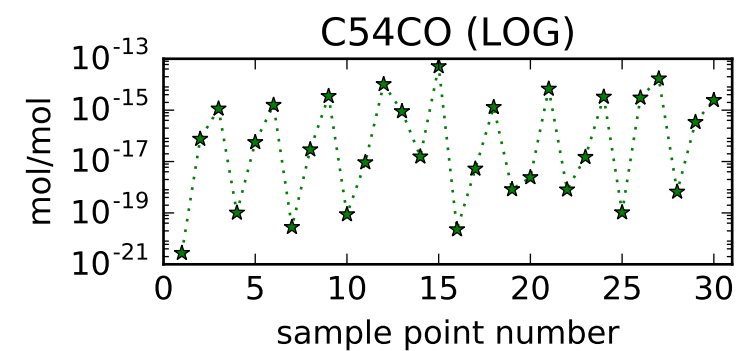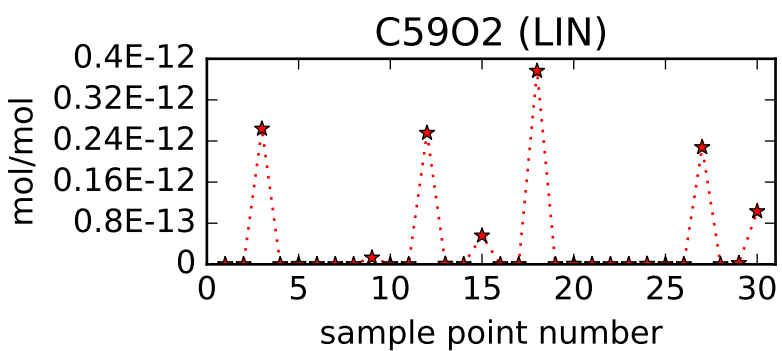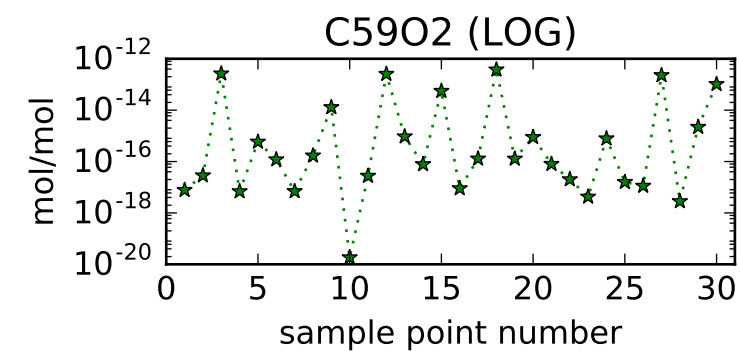

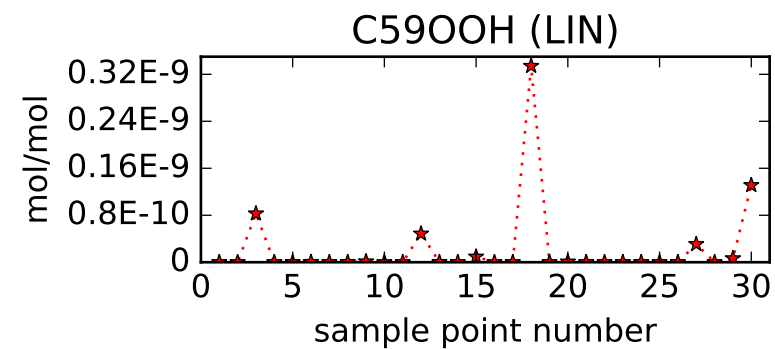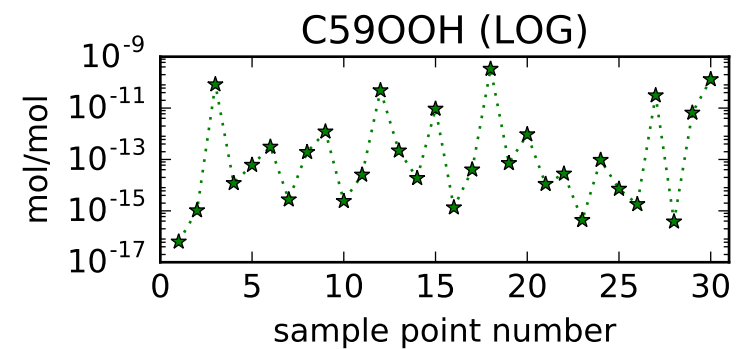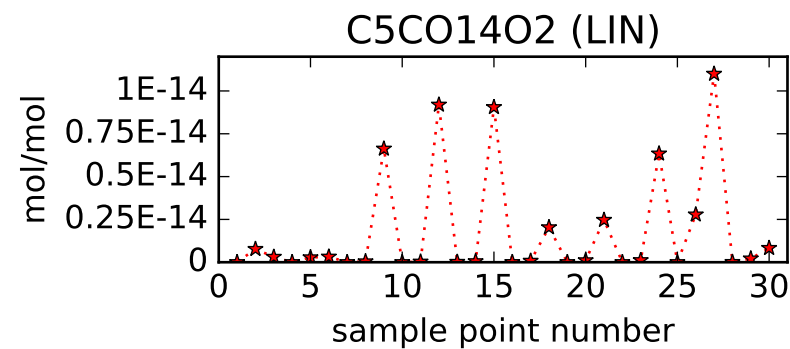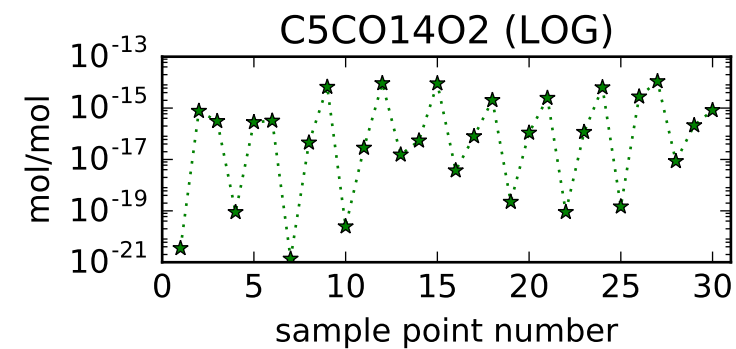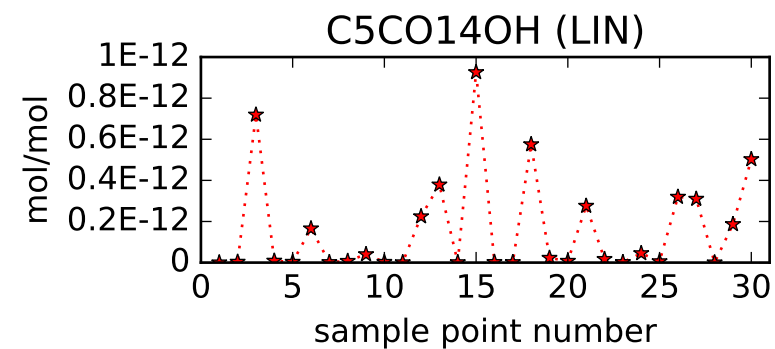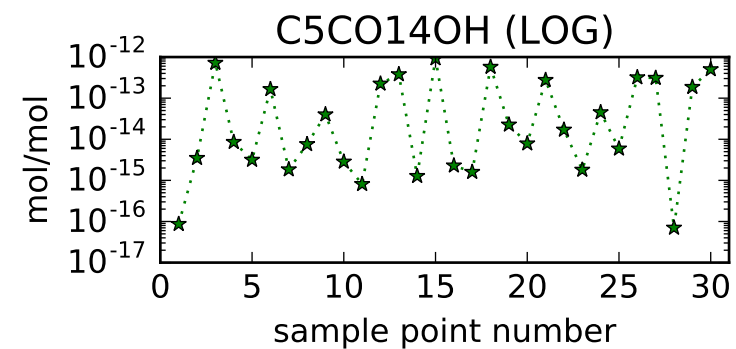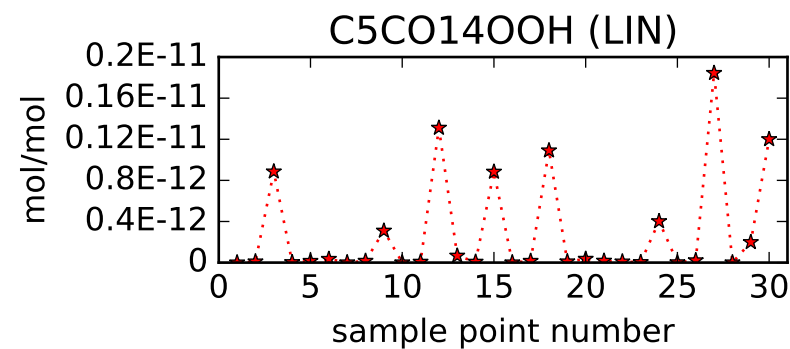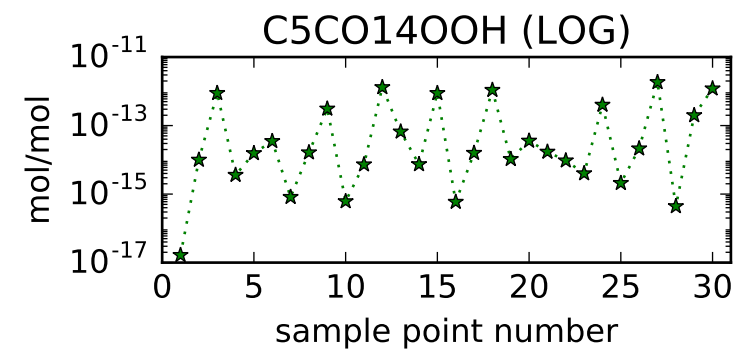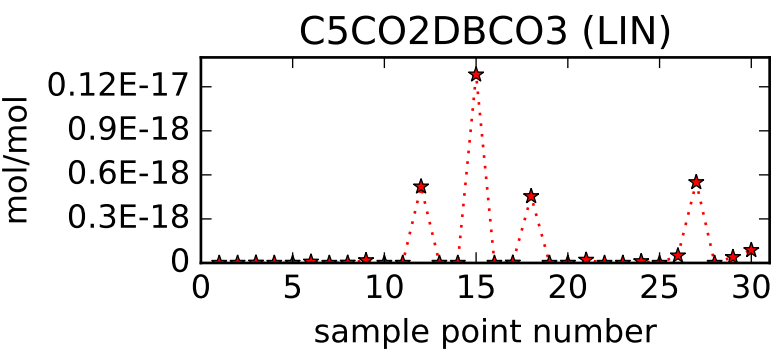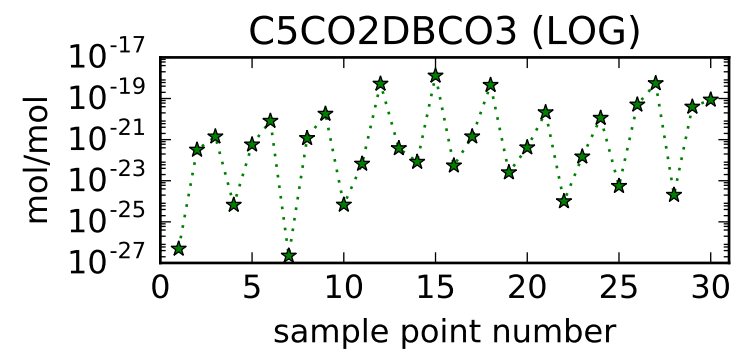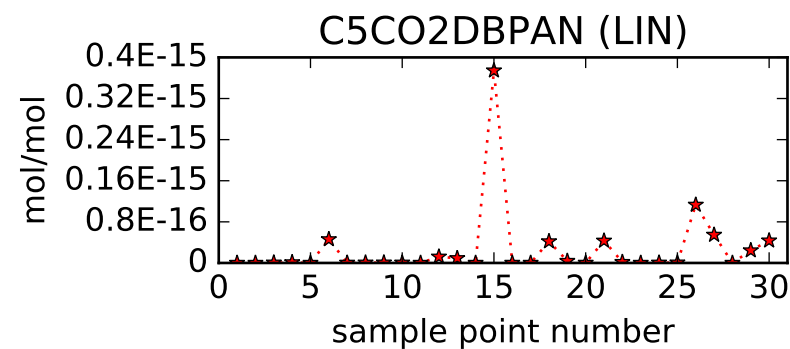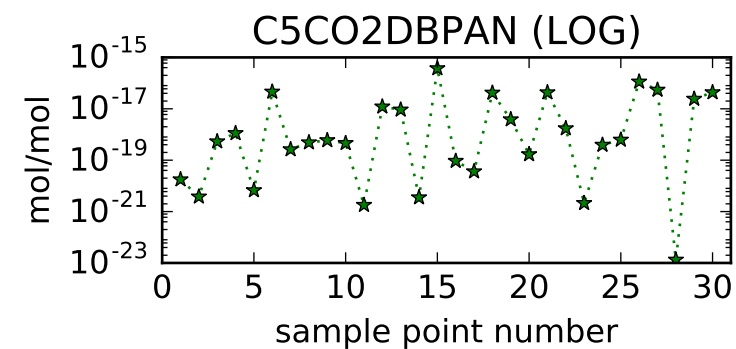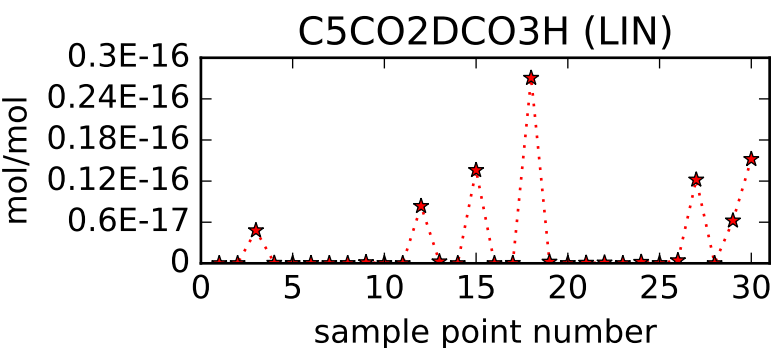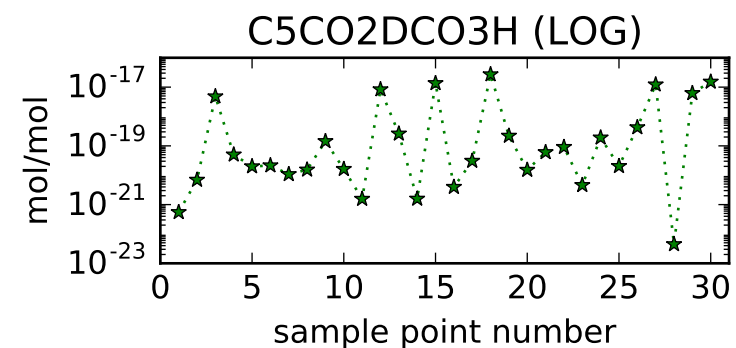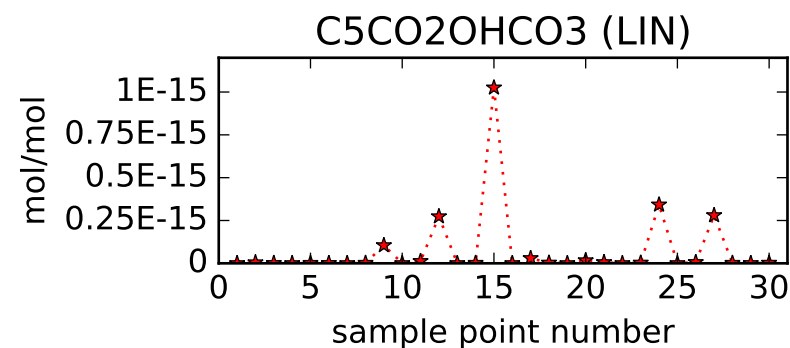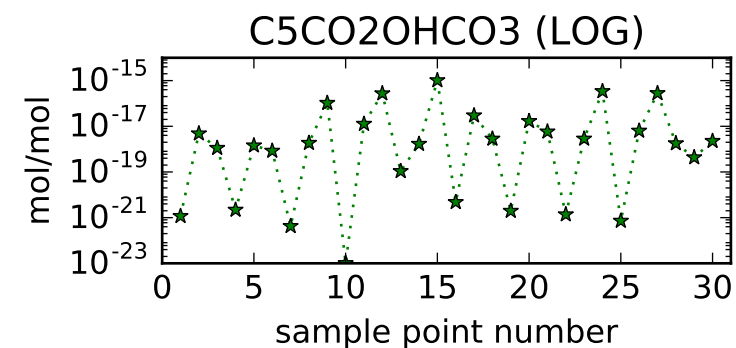

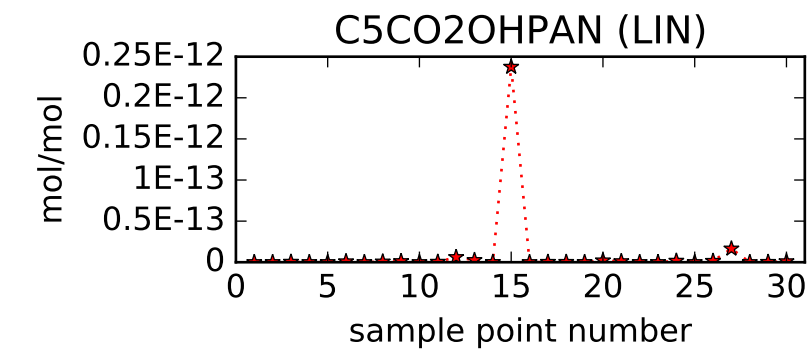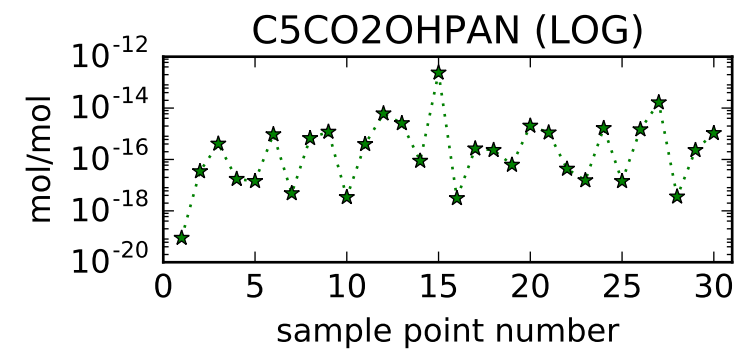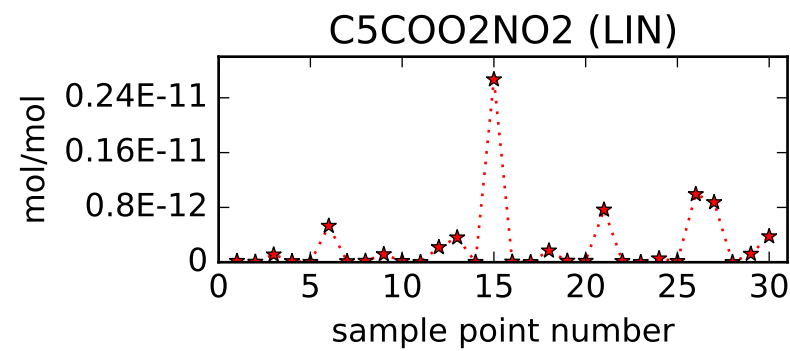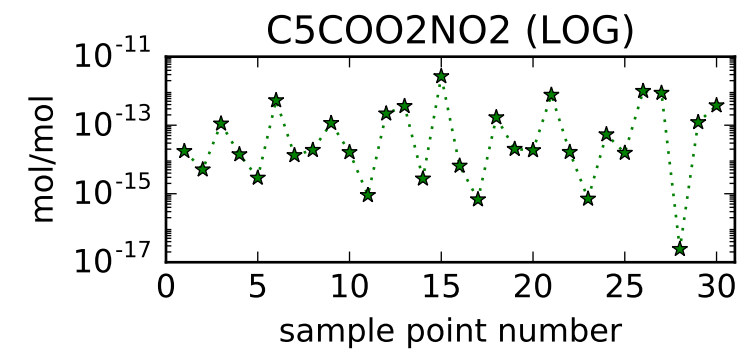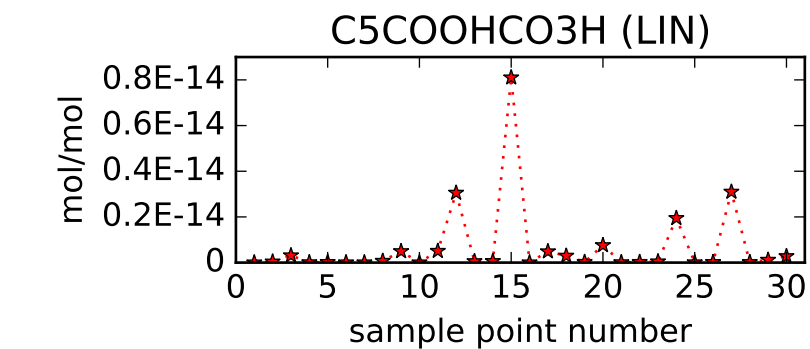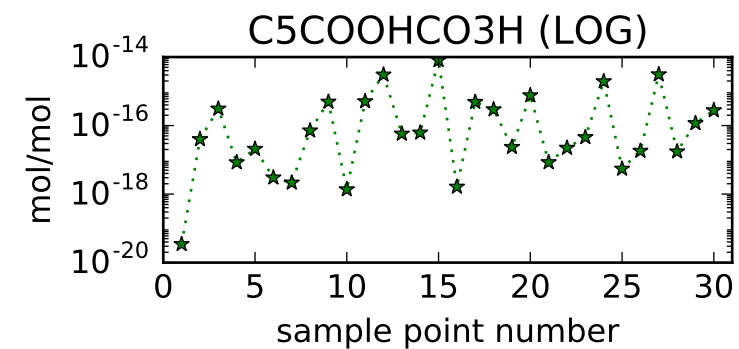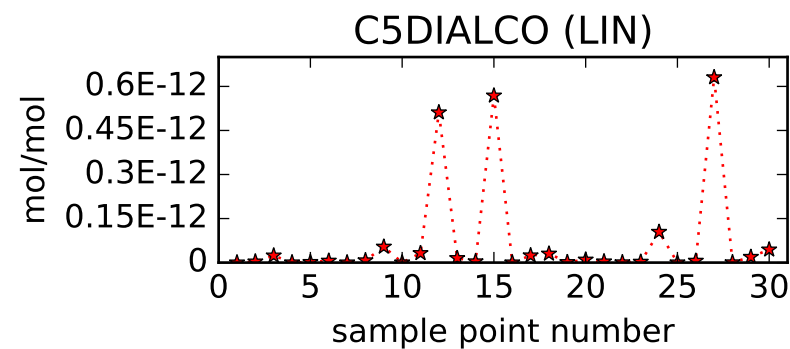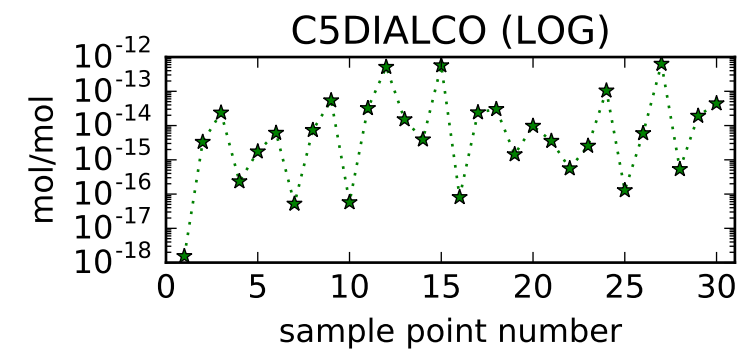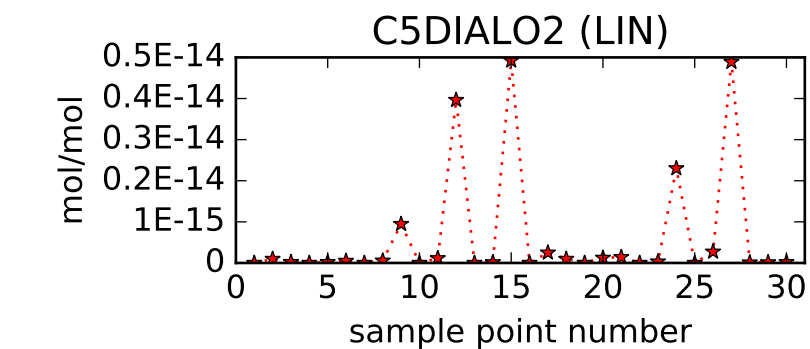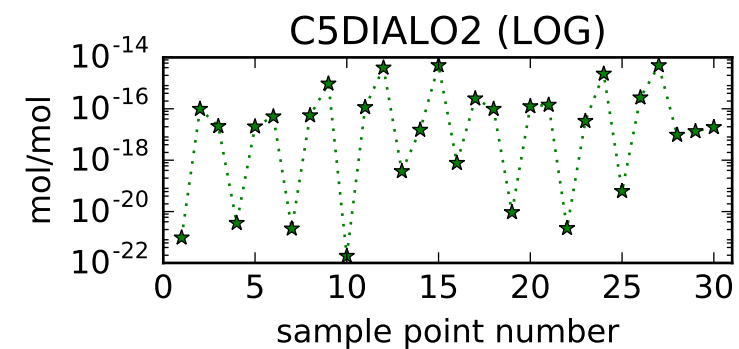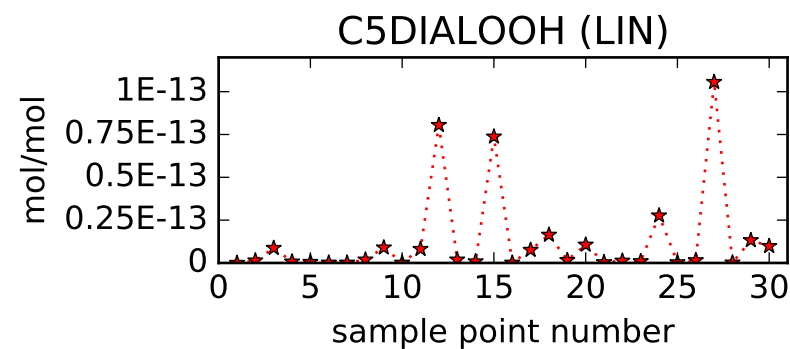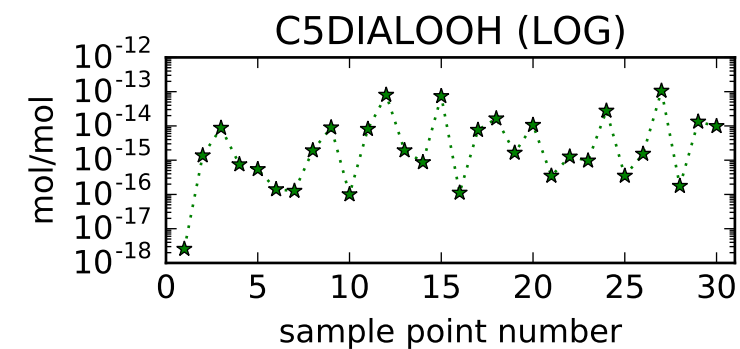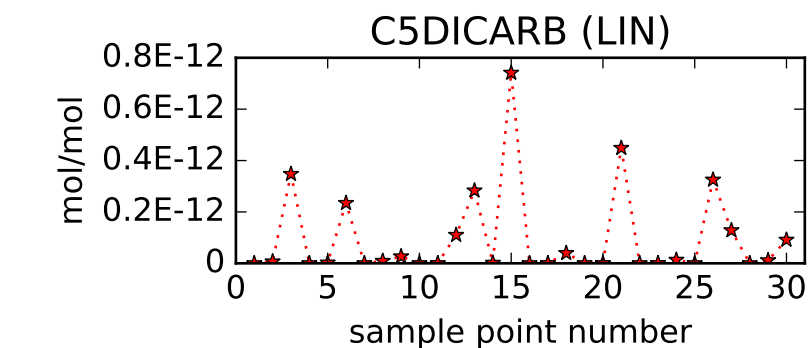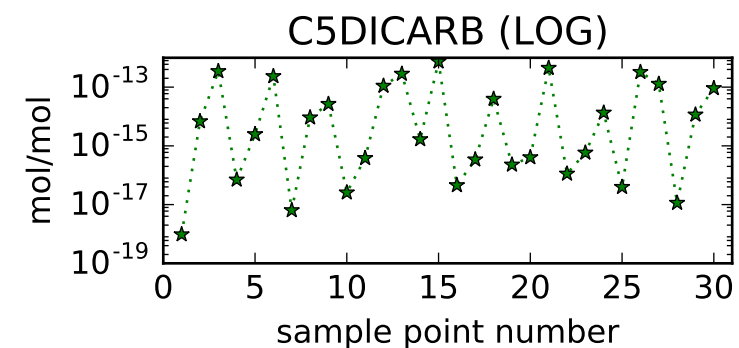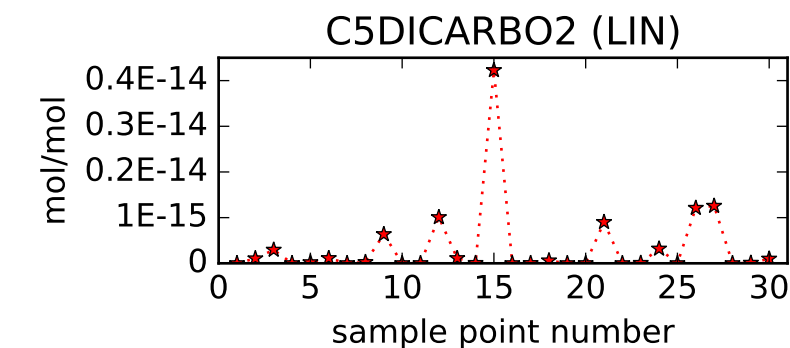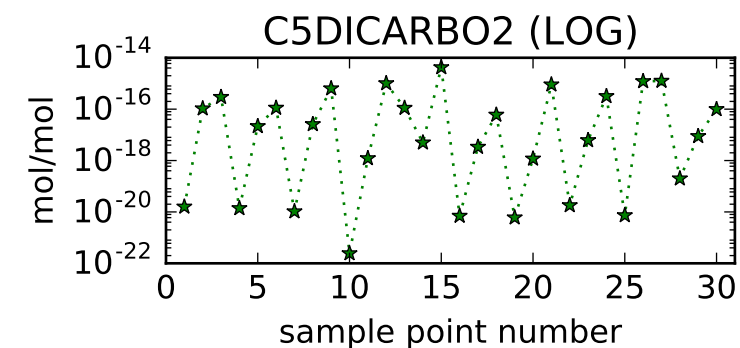

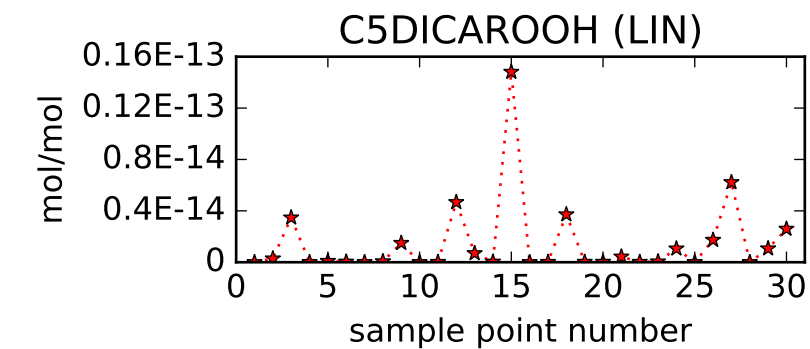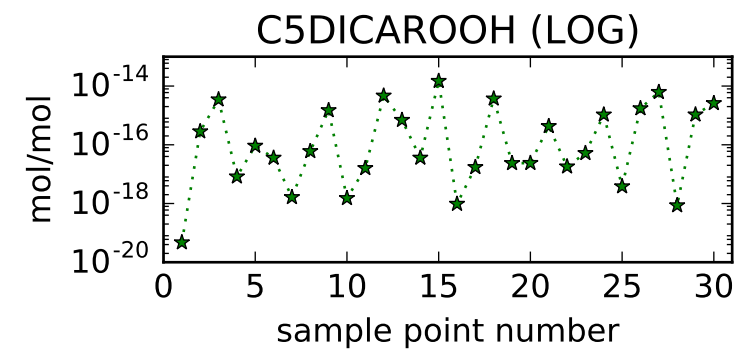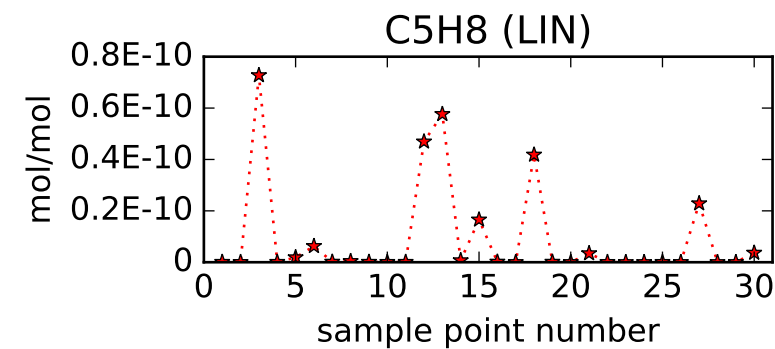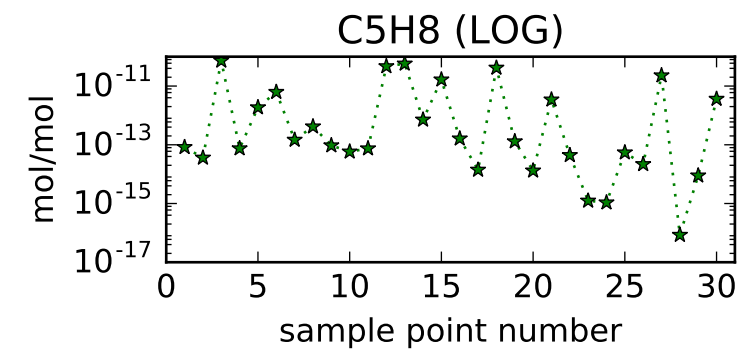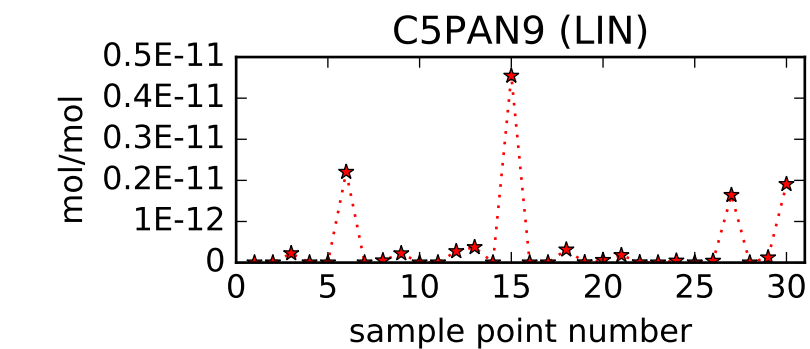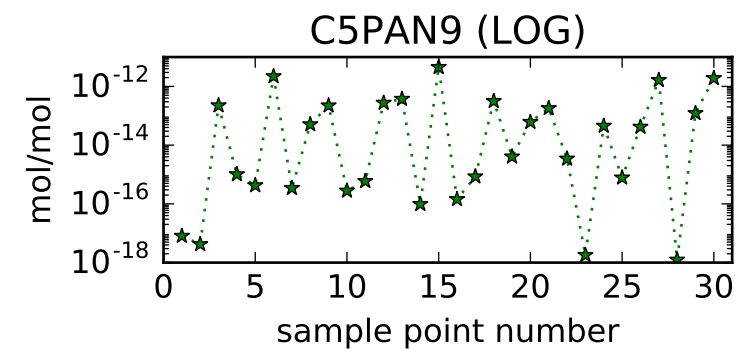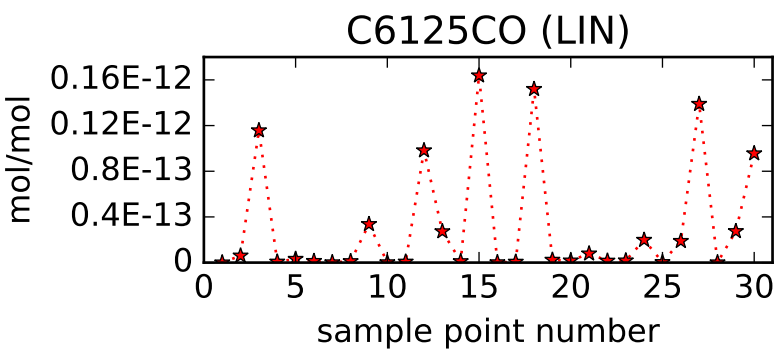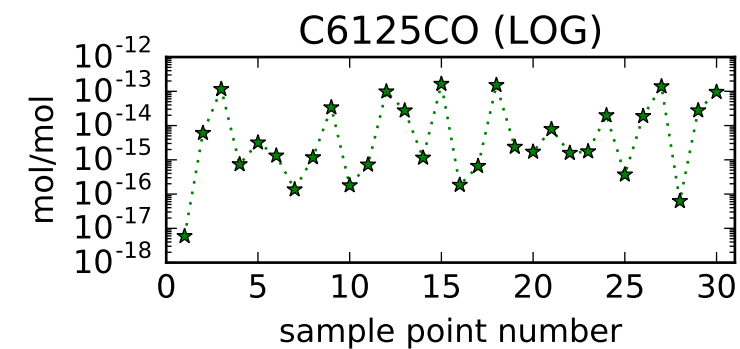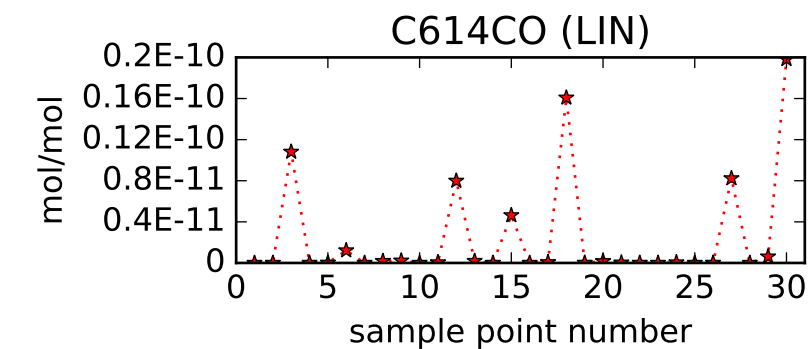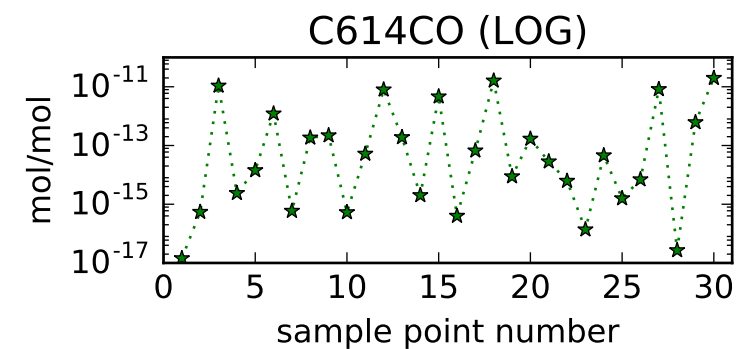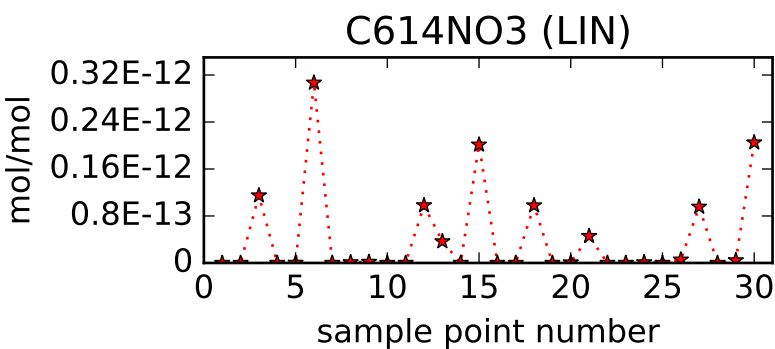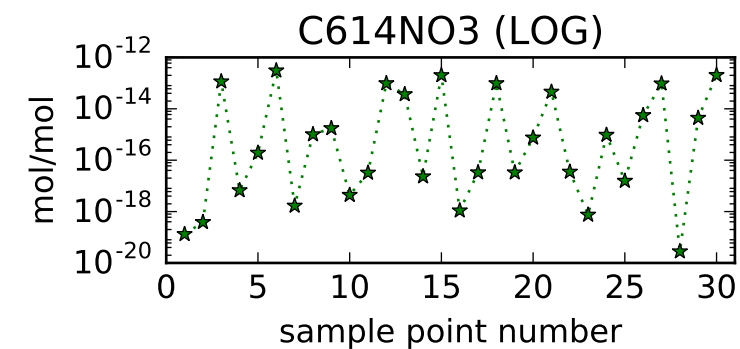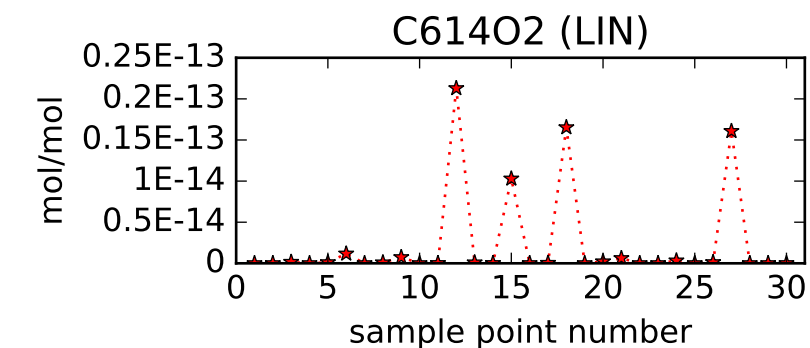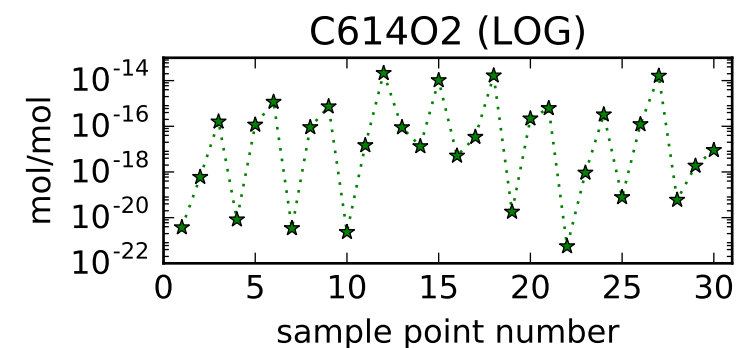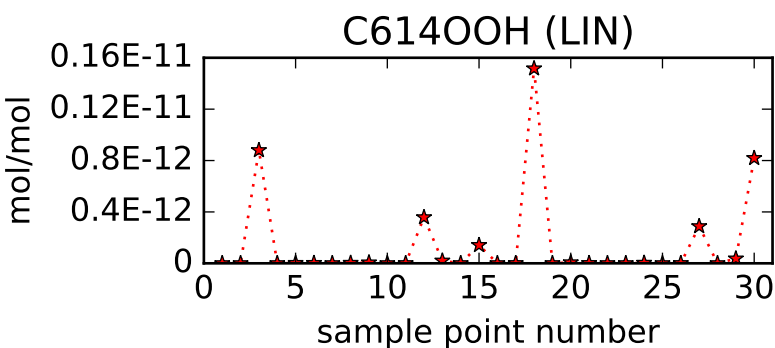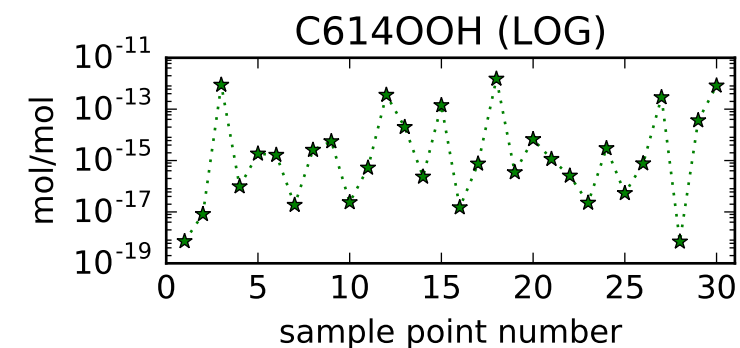

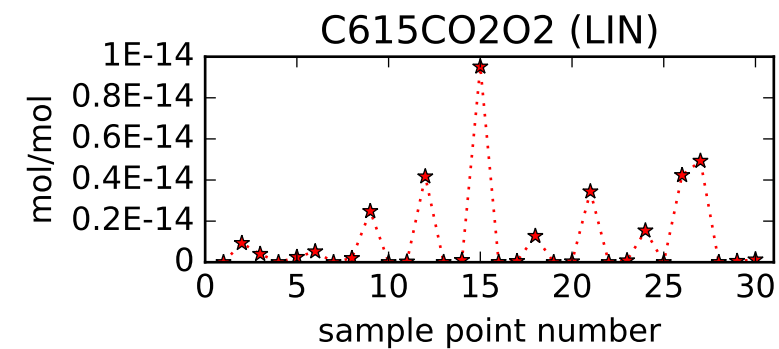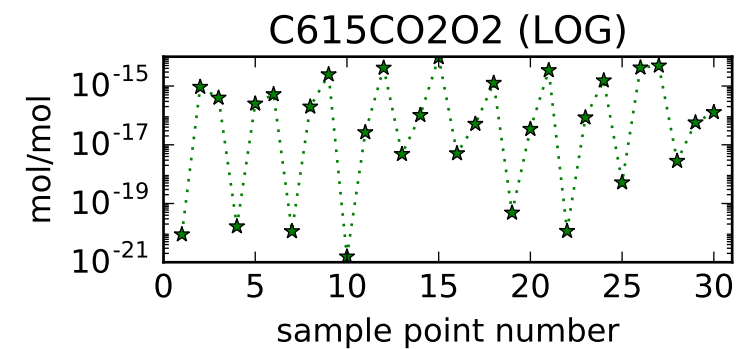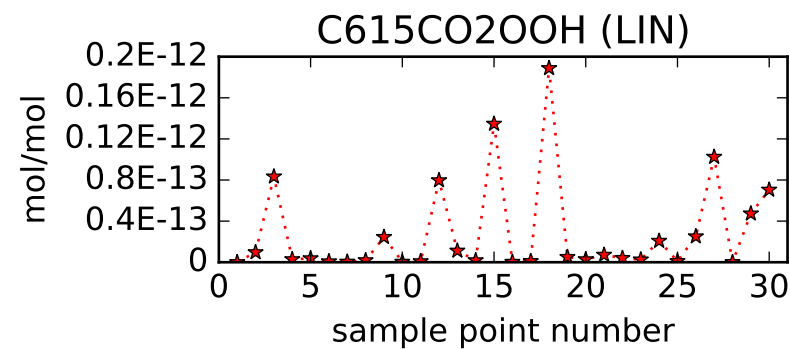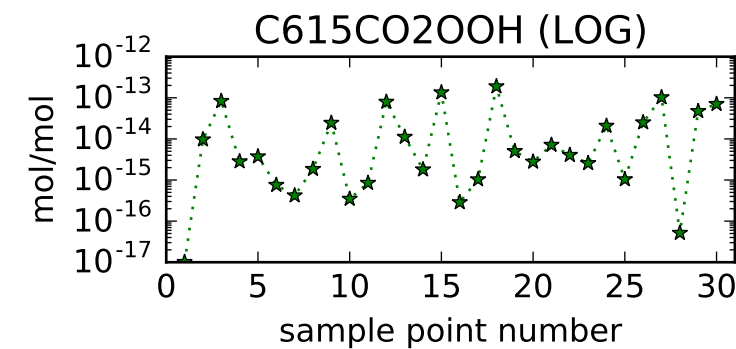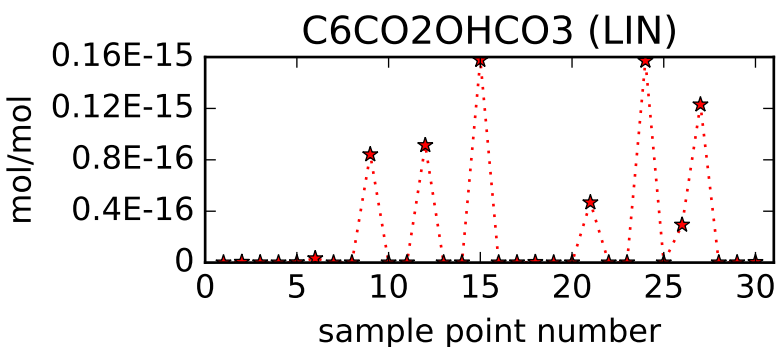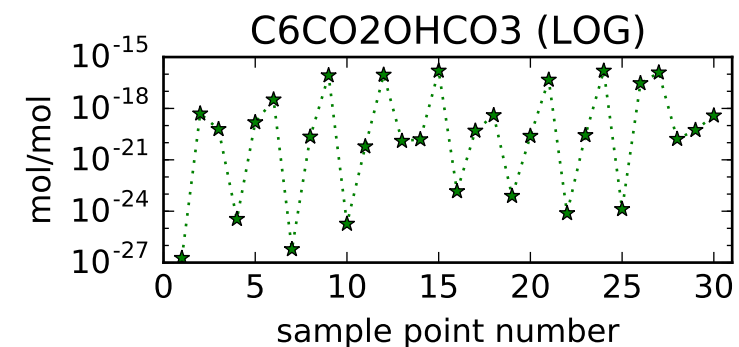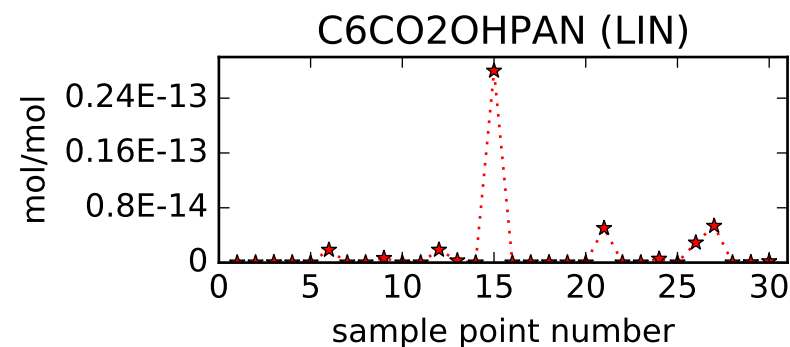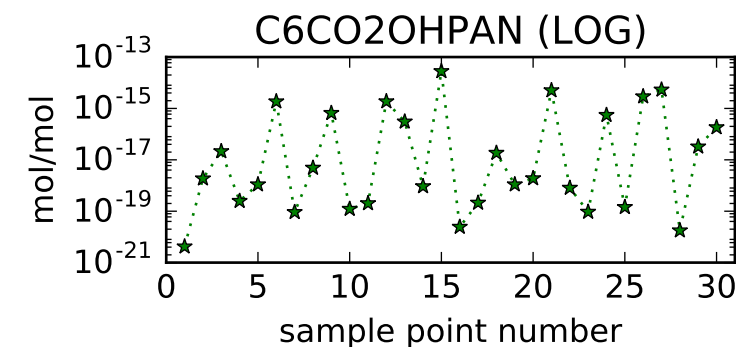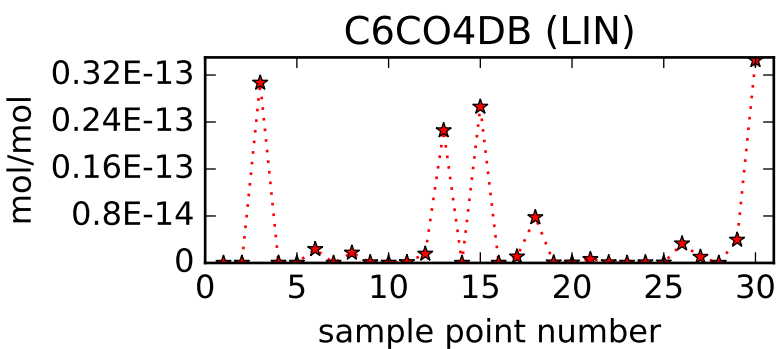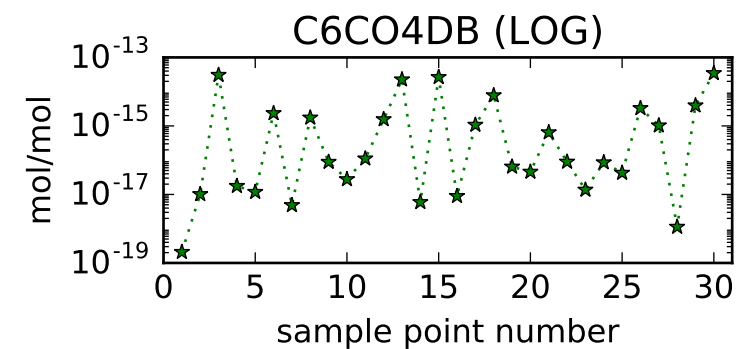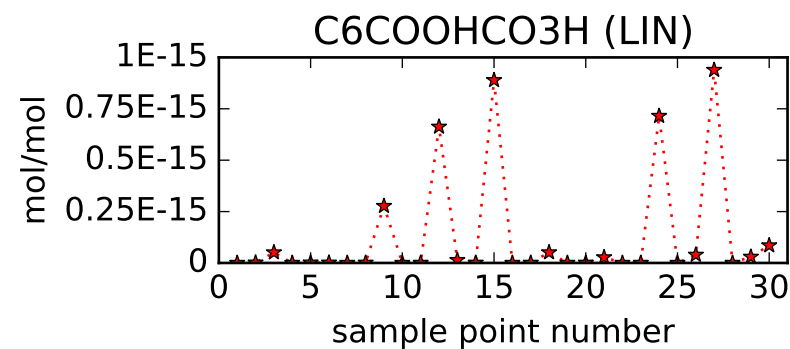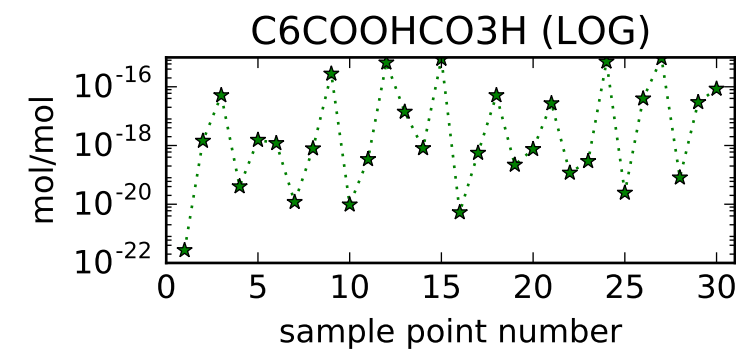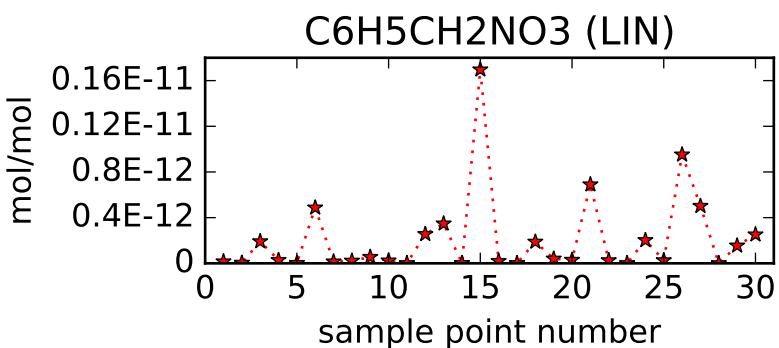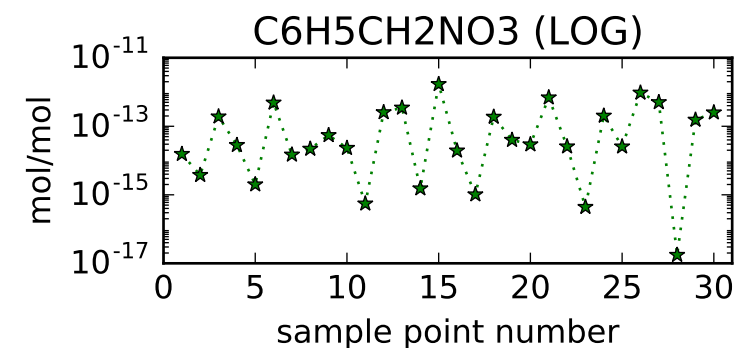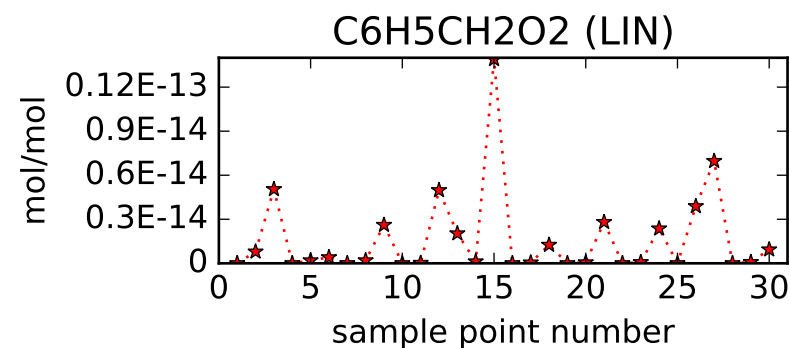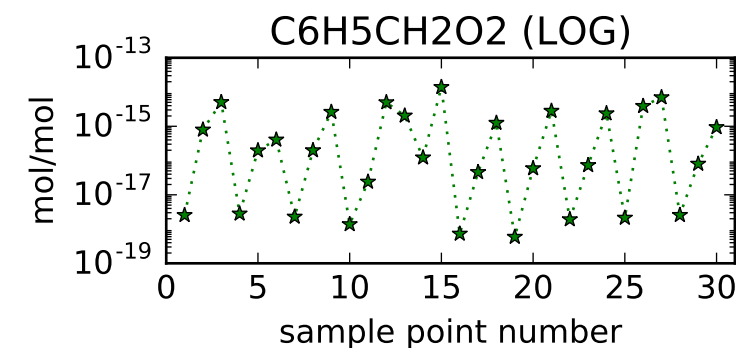



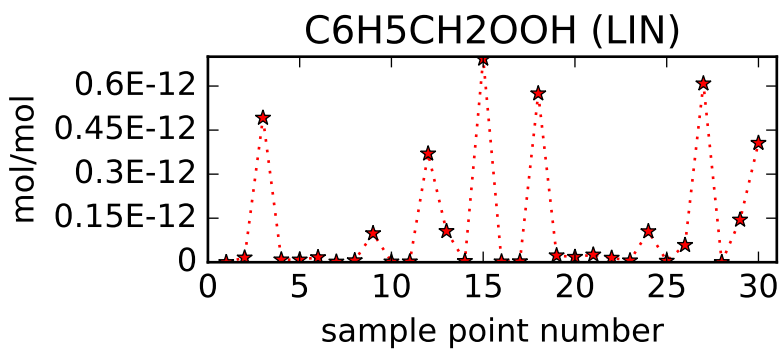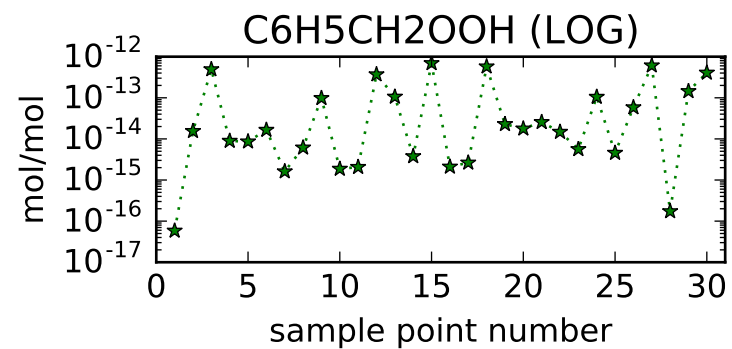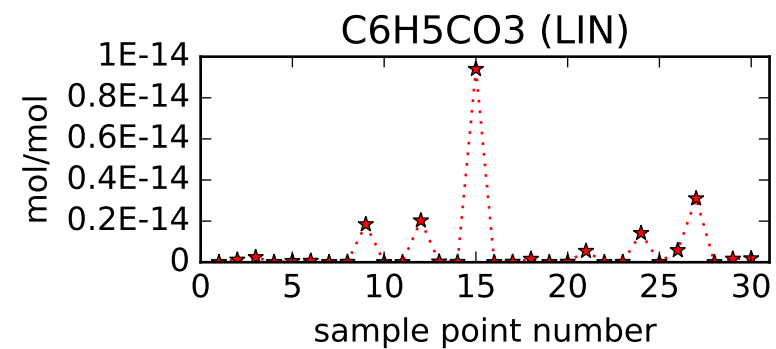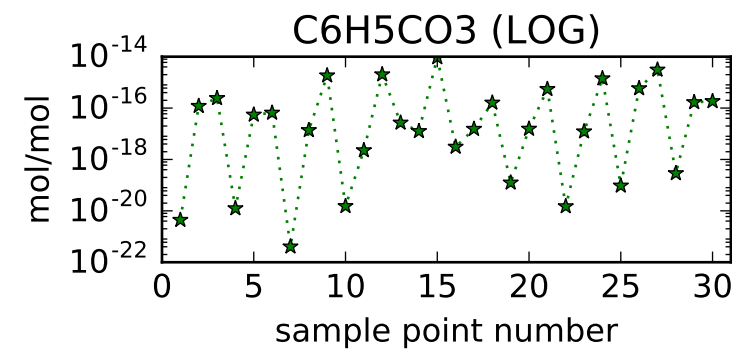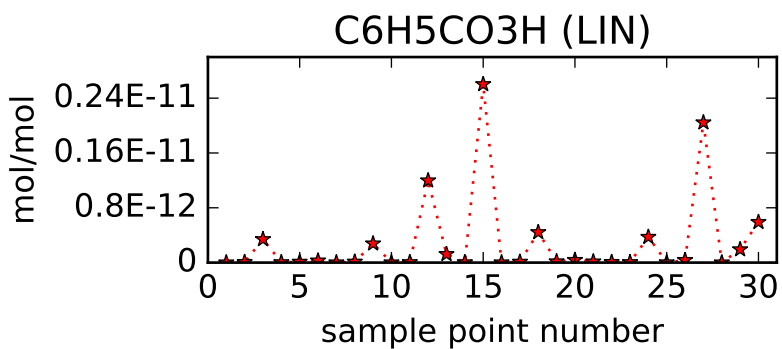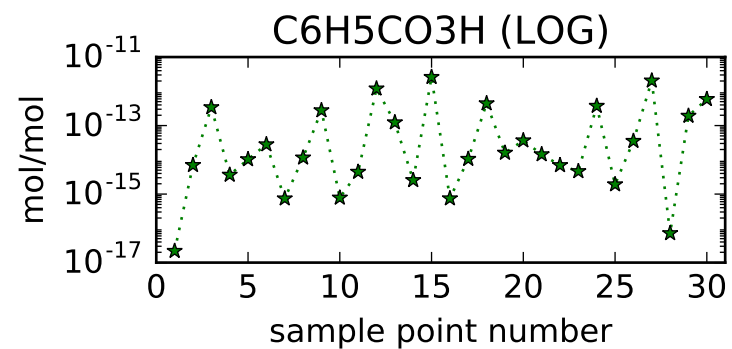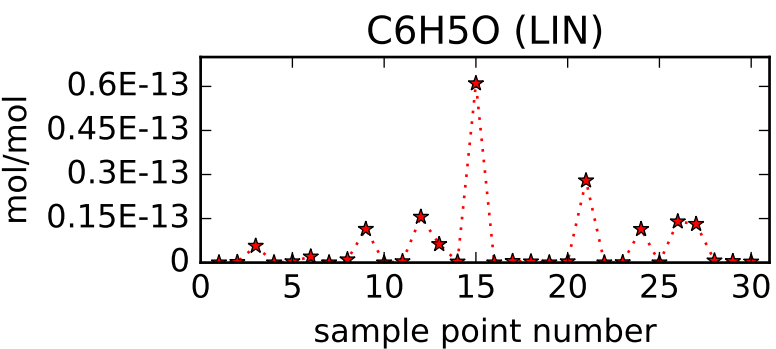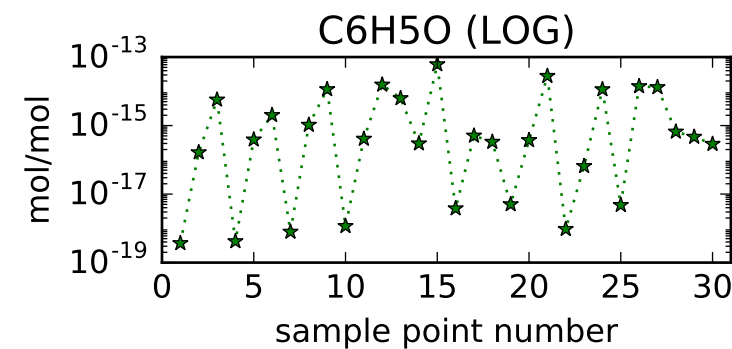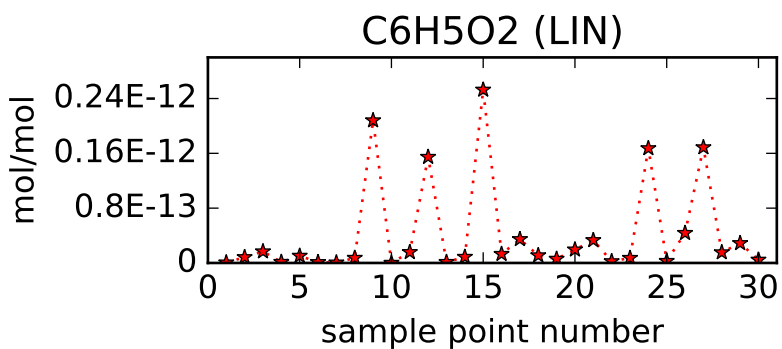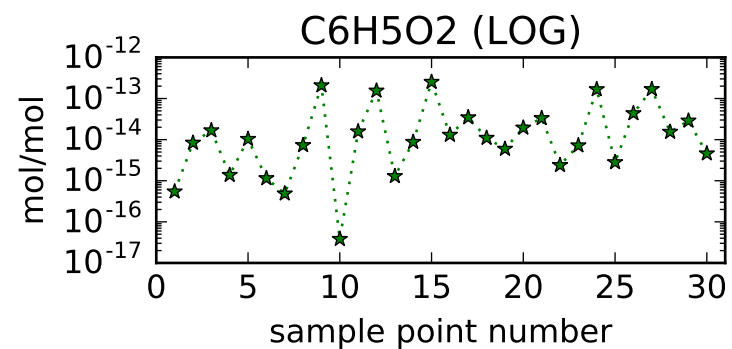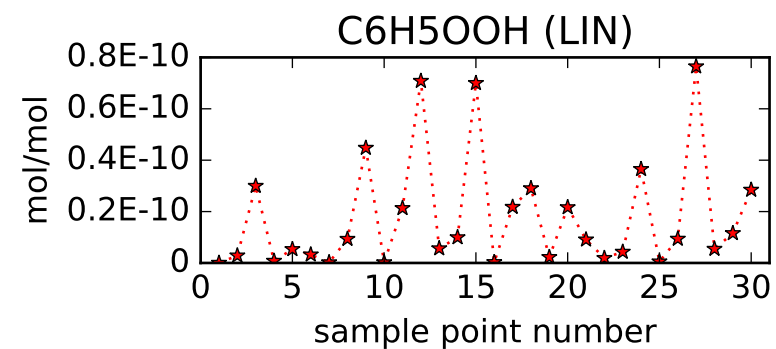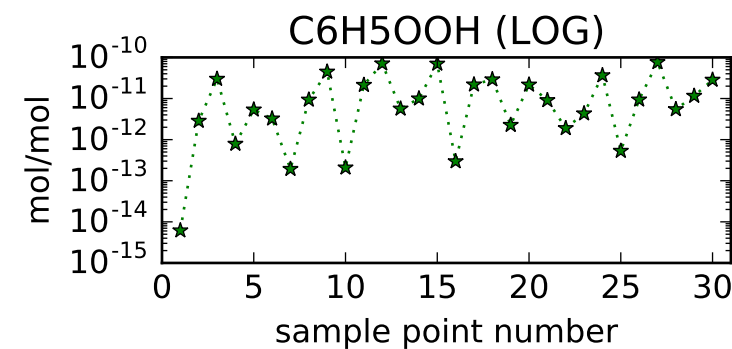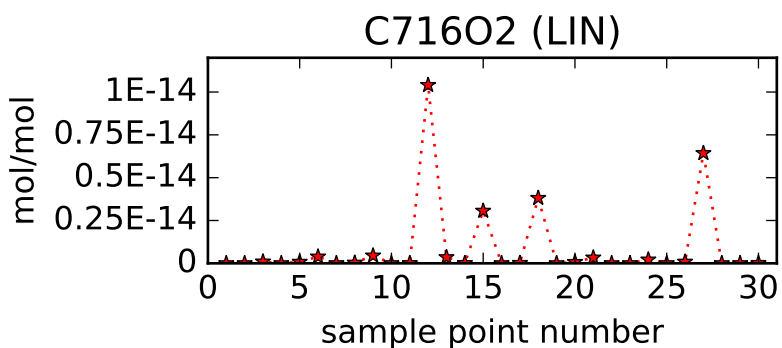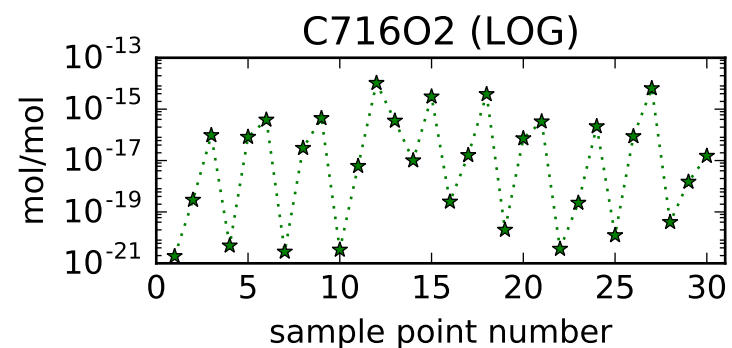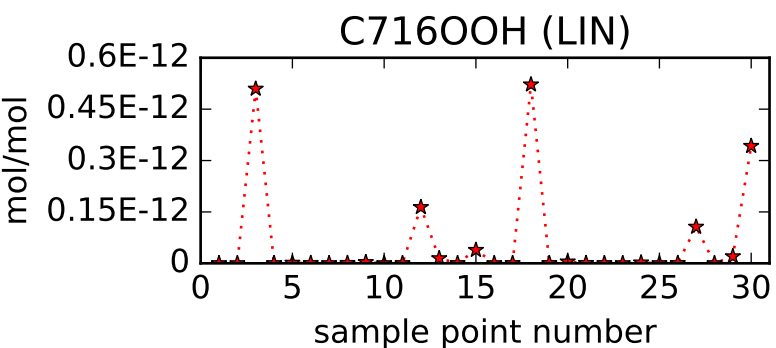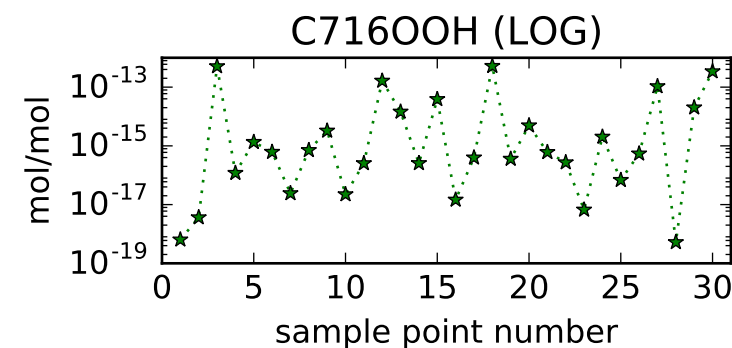

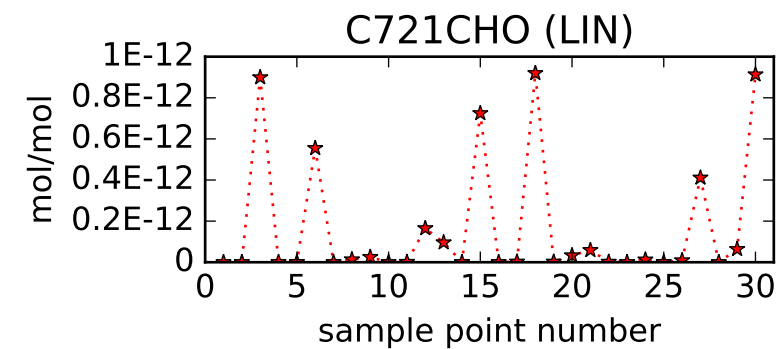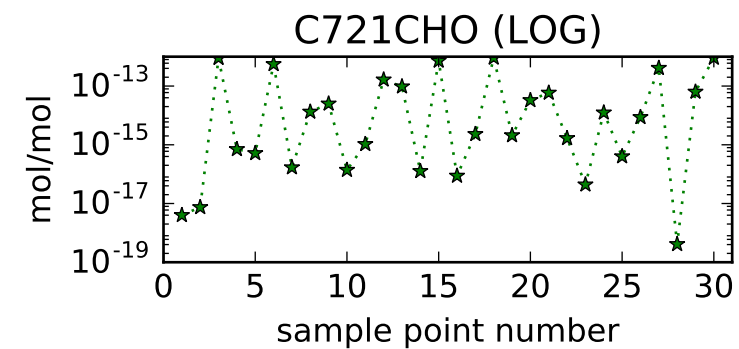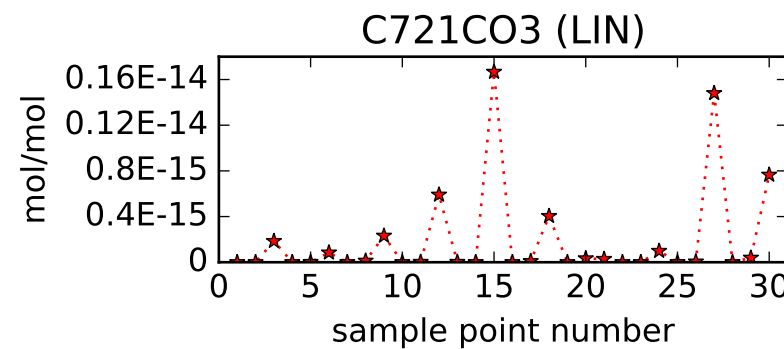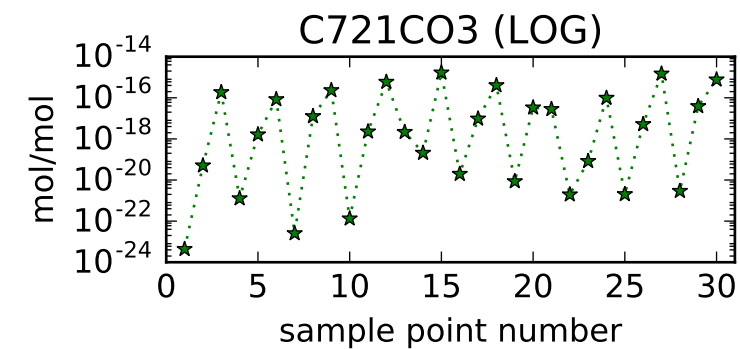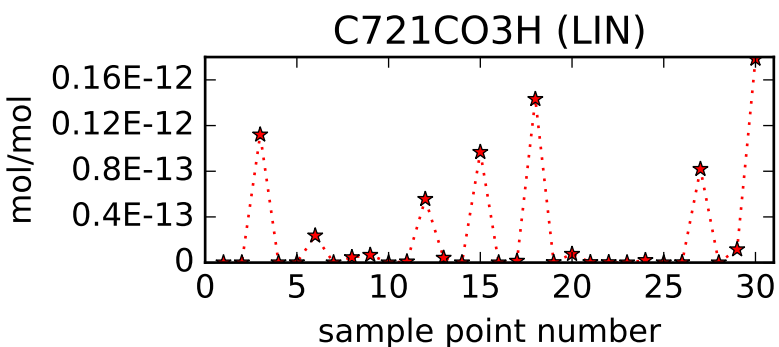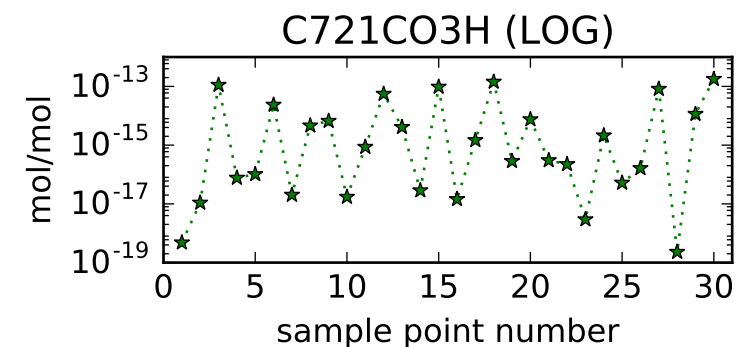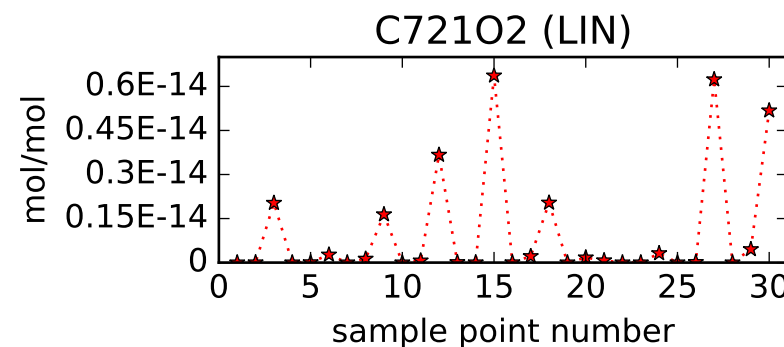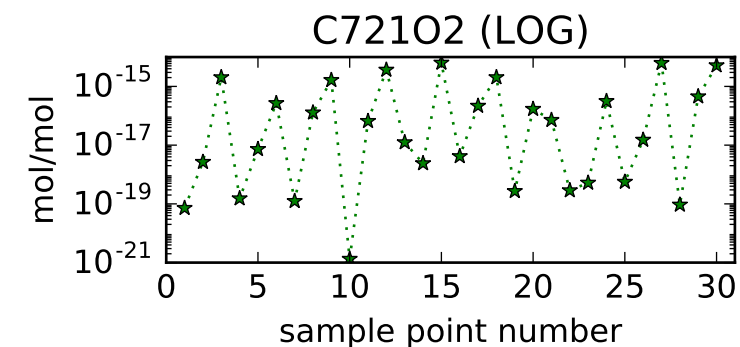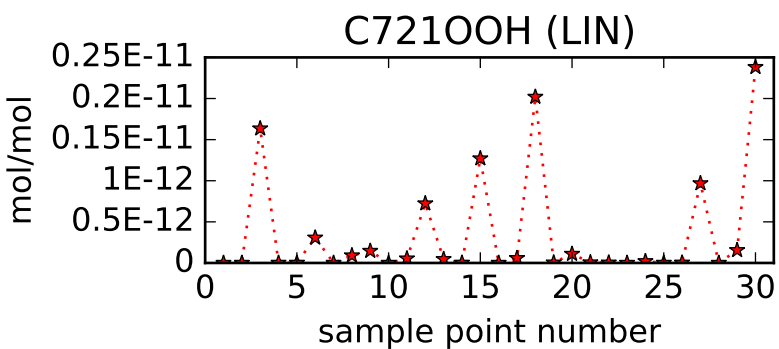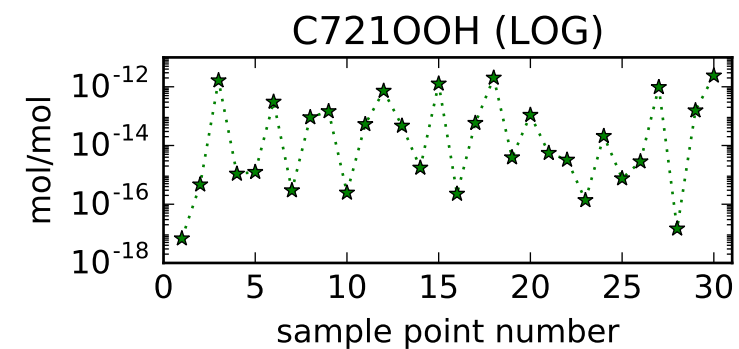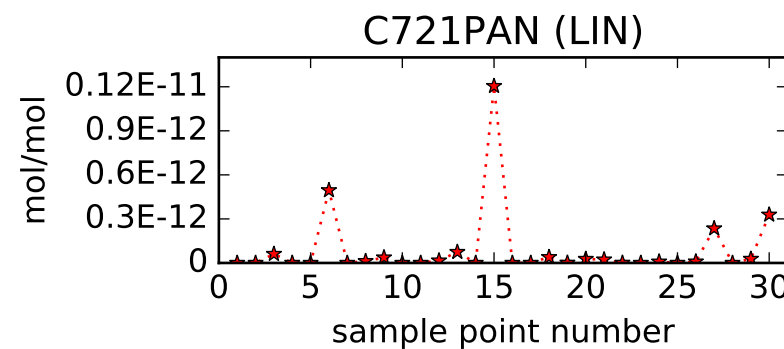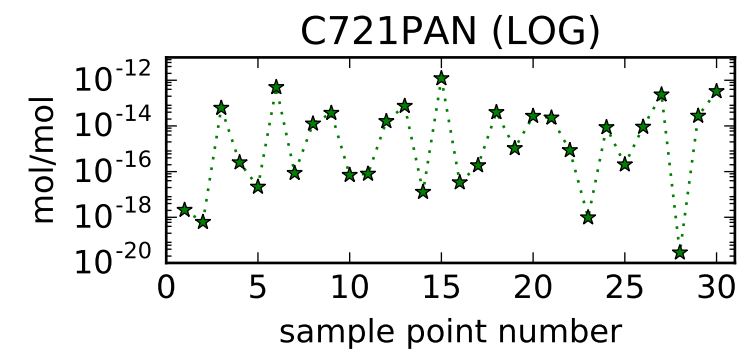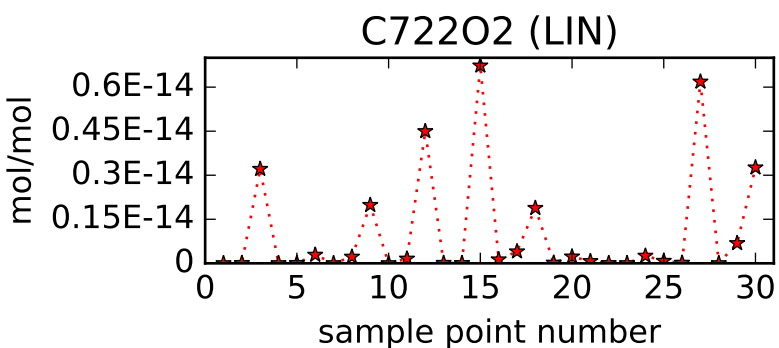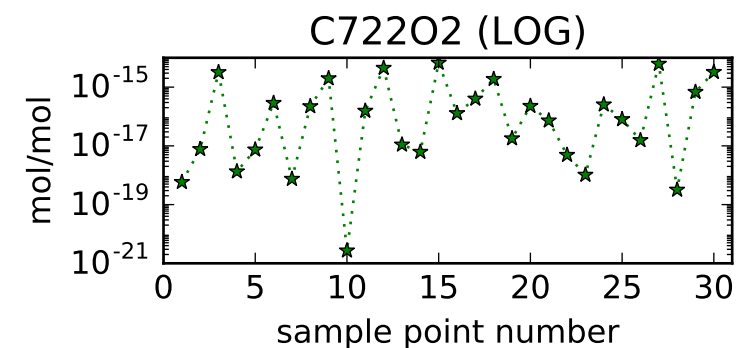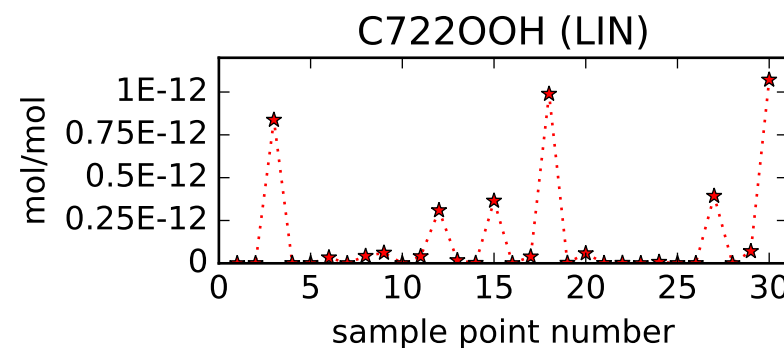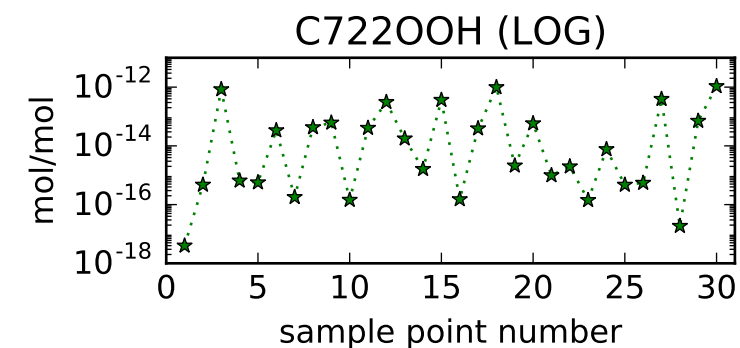

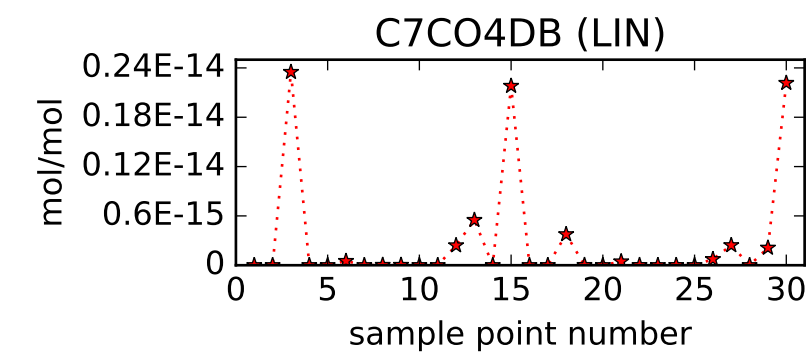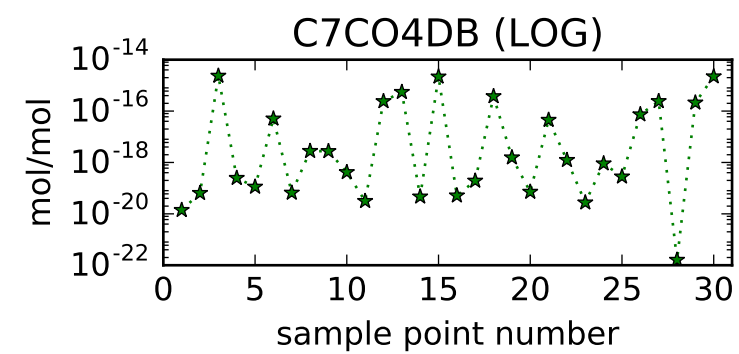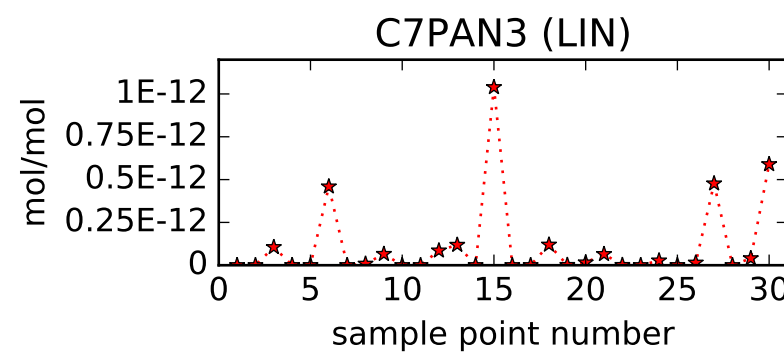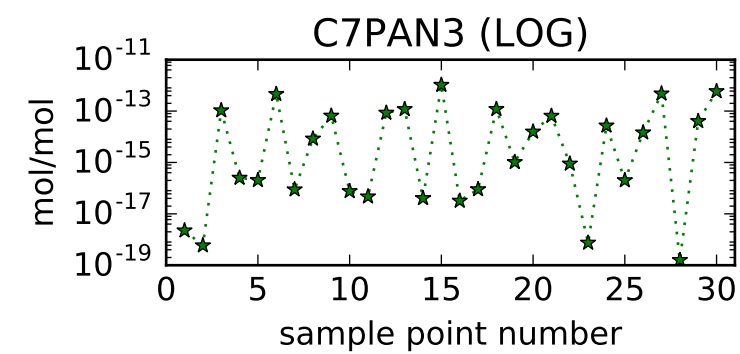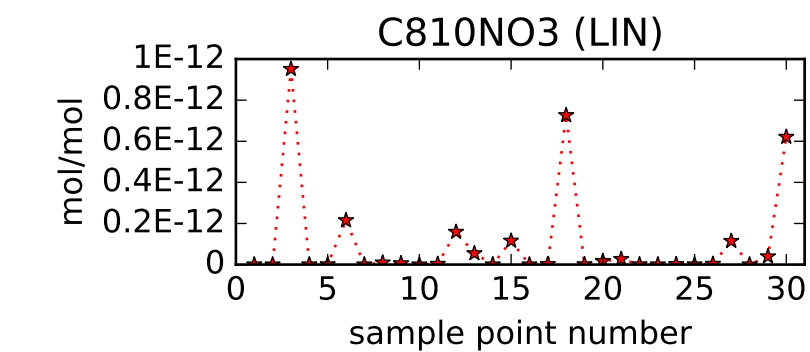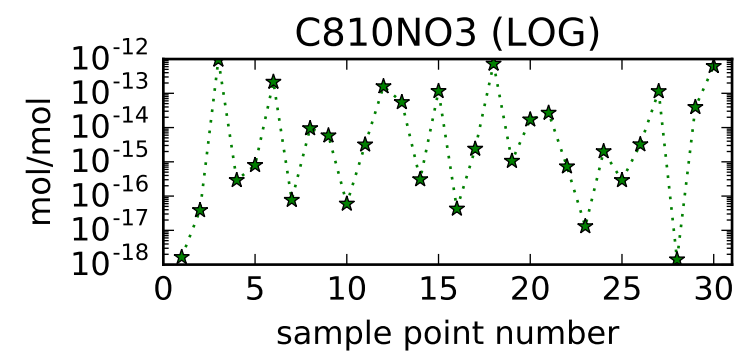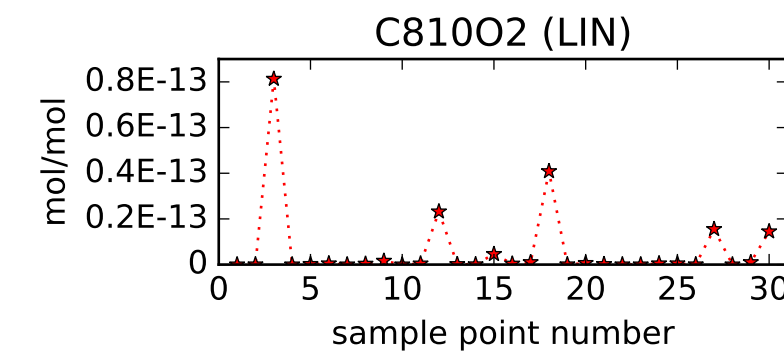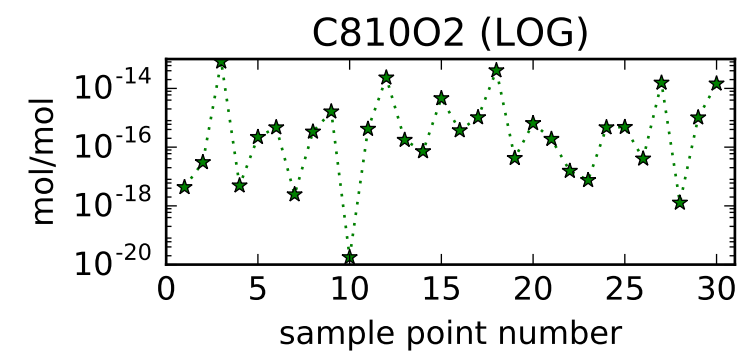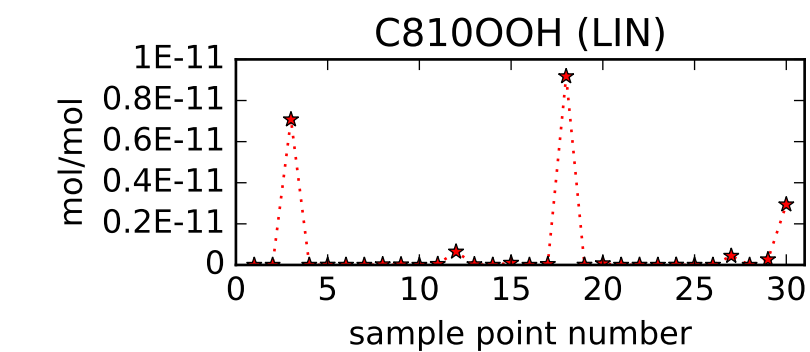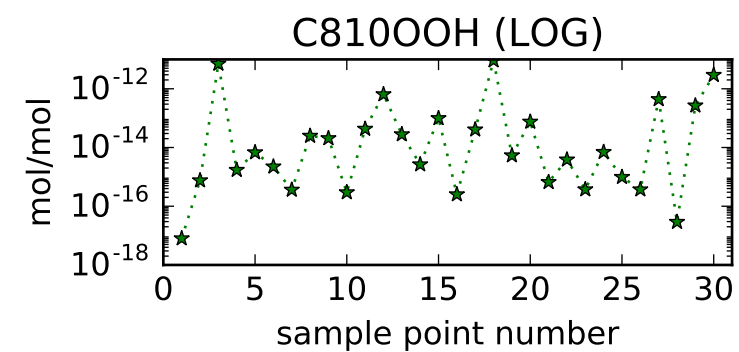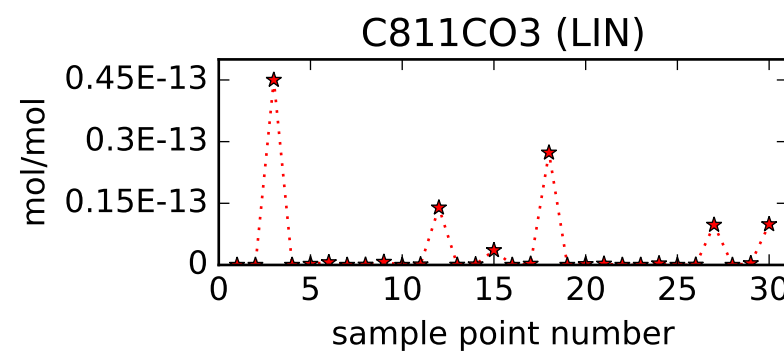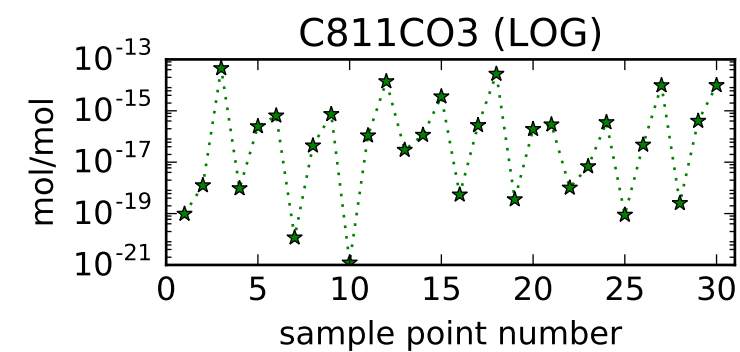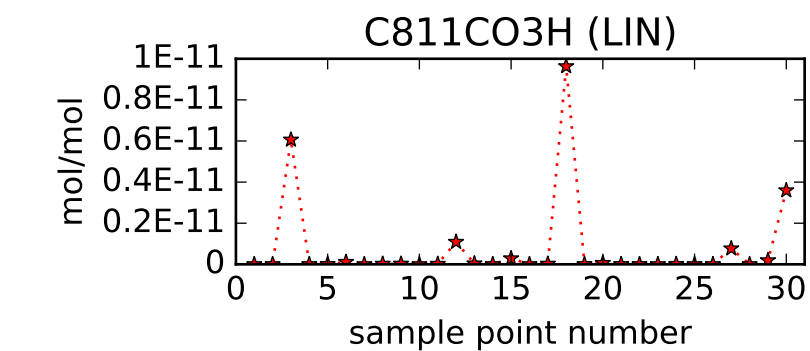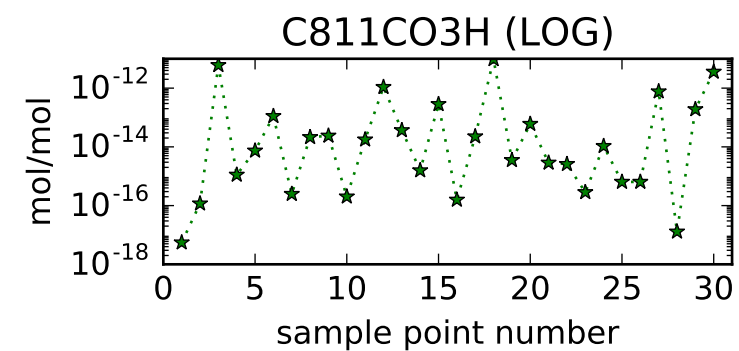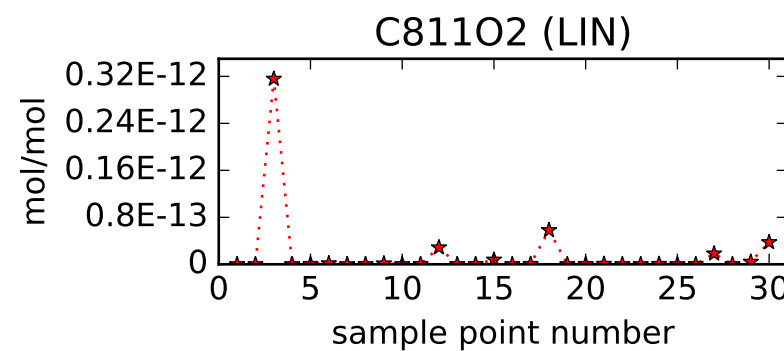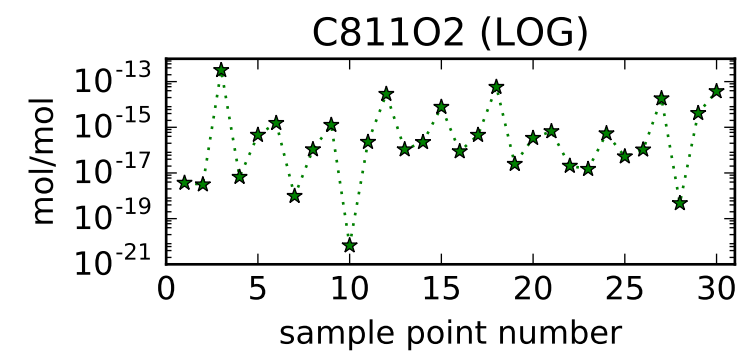

C811PAN (LIN)

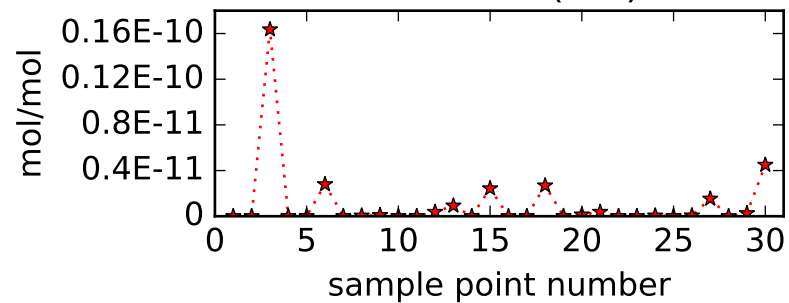

C811PAN (LOG)

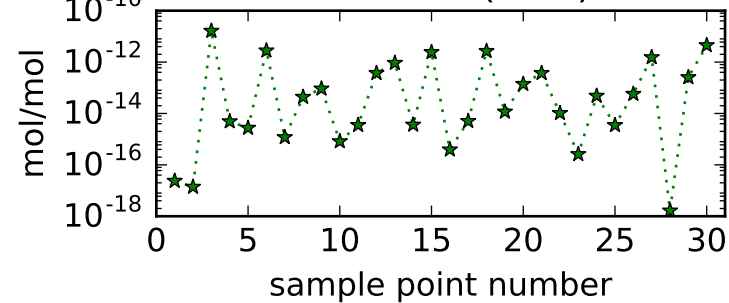

C812O2 (LIN)

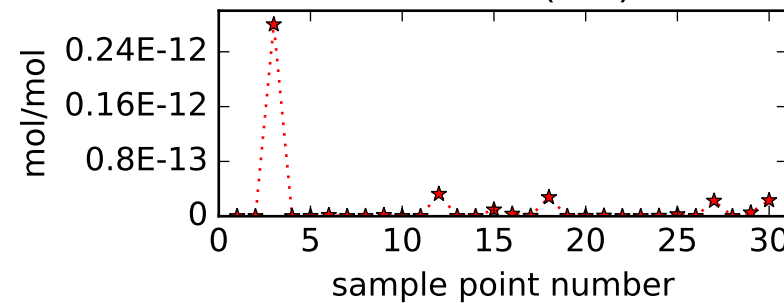

C812O2 (LOG)

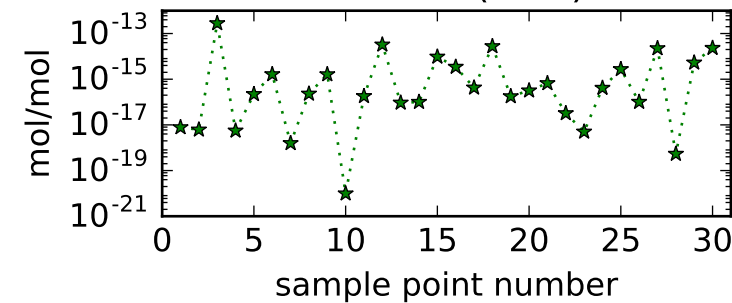

C812OOH (LIN)

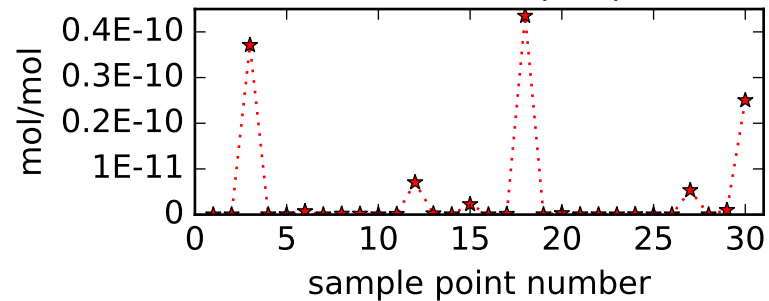

C812OOH (LOG)

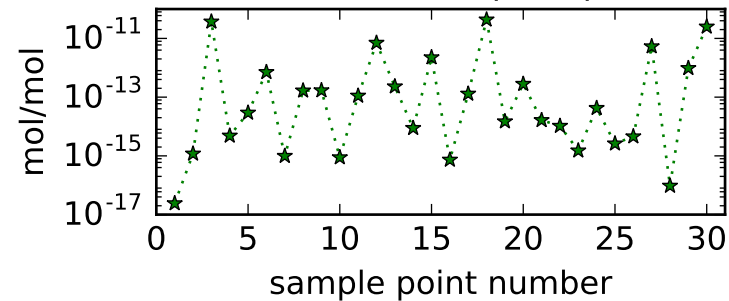

C813O2 (LIN)

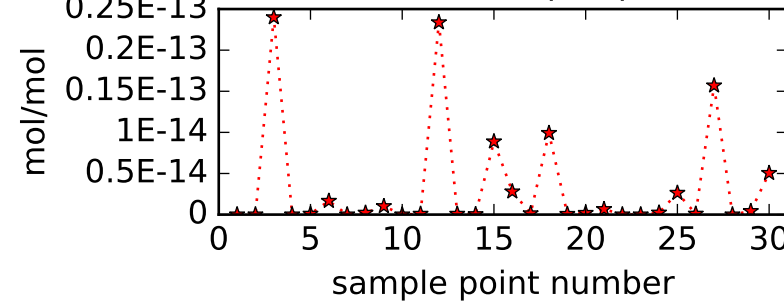

C813O2 (LOG)

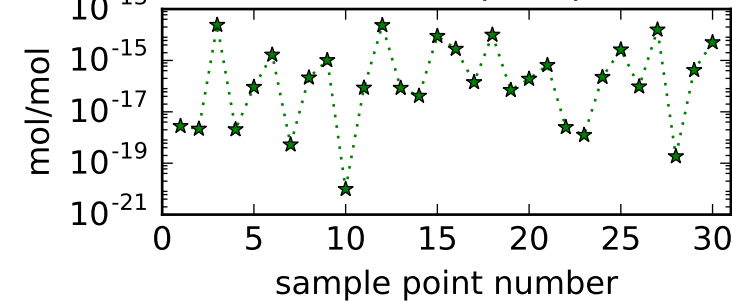

C813OOH (LIN)

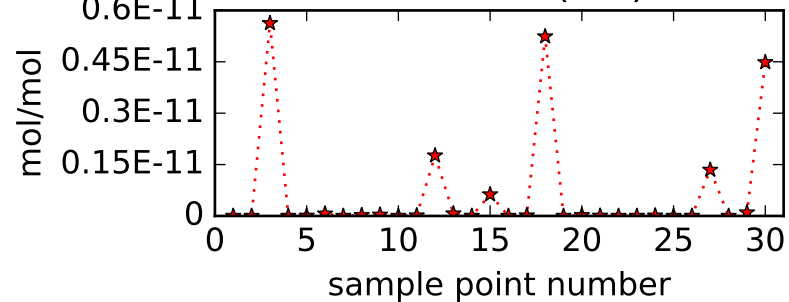

C813OOH (LOG)

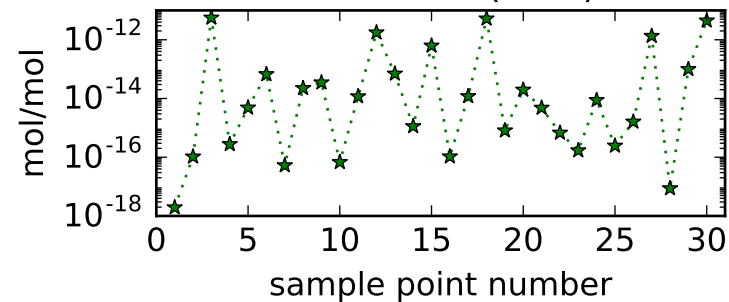

C85CO3 (LIN)

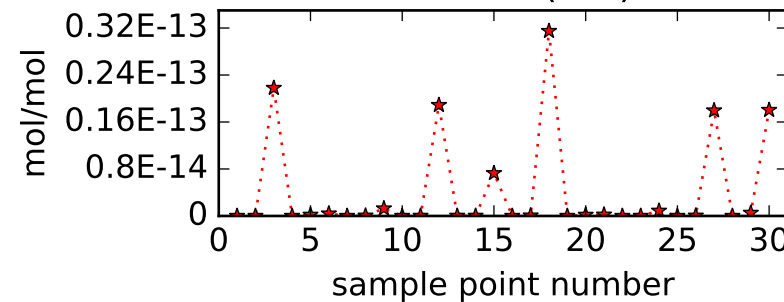

C85CO3 (LOG)

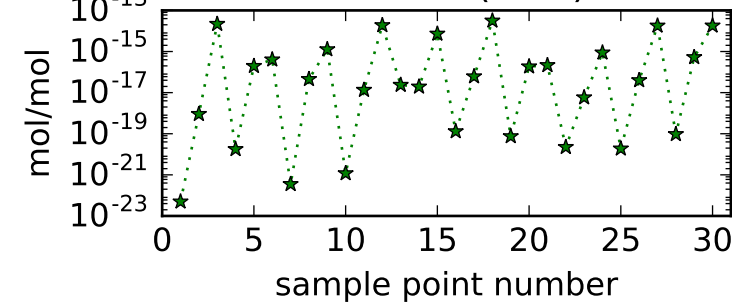

C85CO3H (LIN)

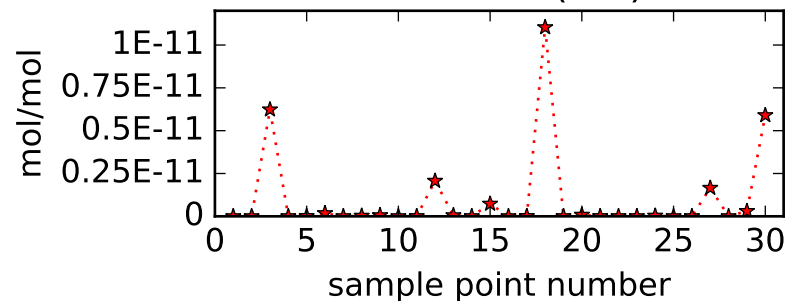

C85CO3H (LOG)

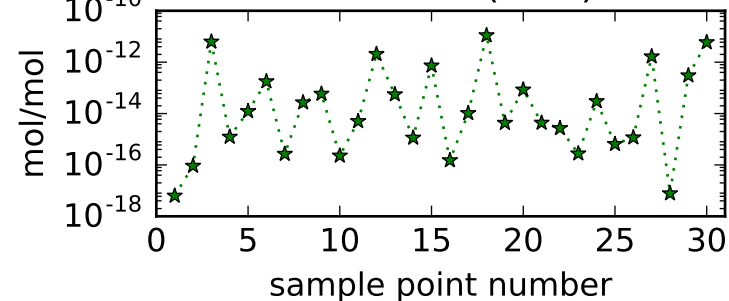

C85O2 (LIN)

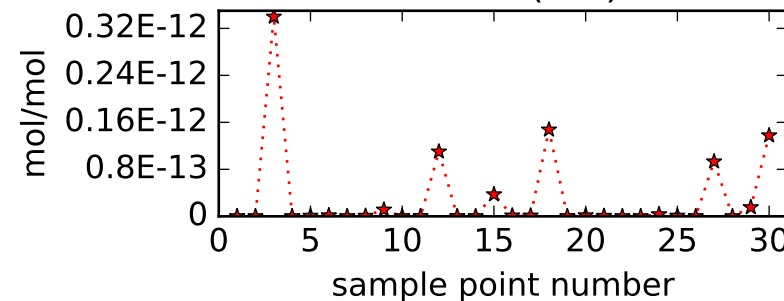

C85O2 (LOG)

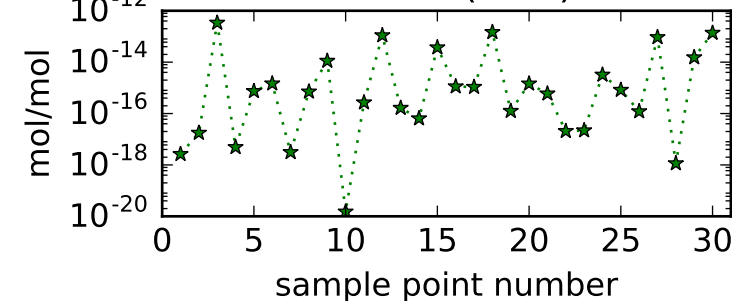

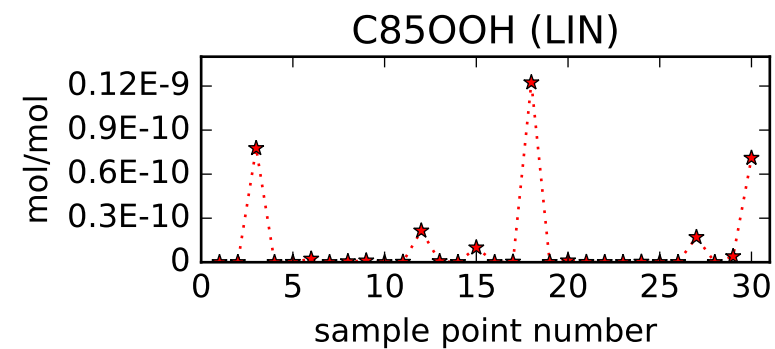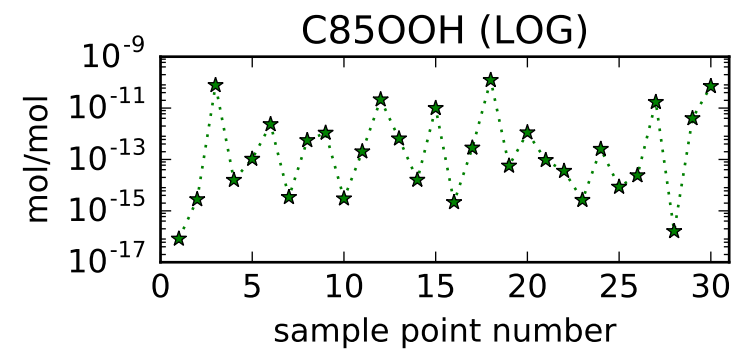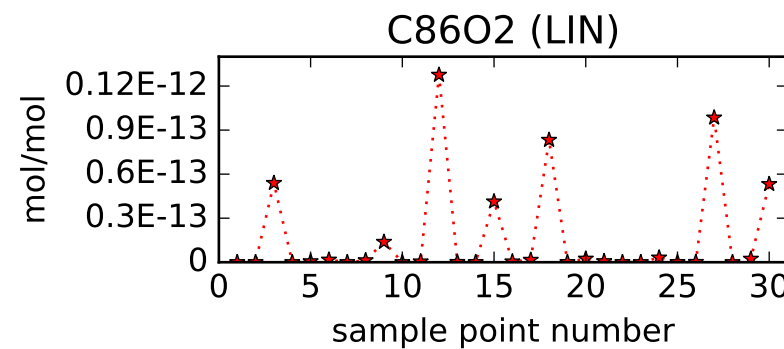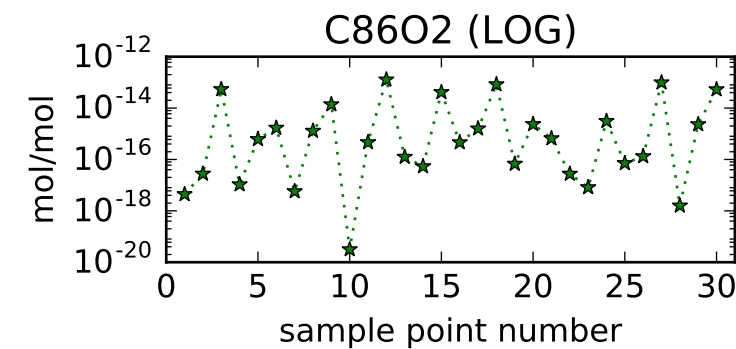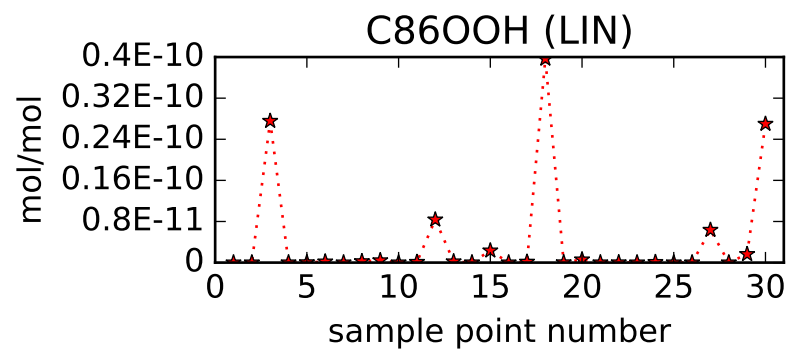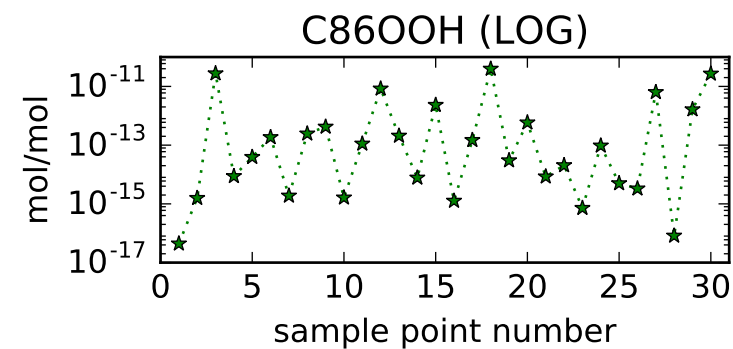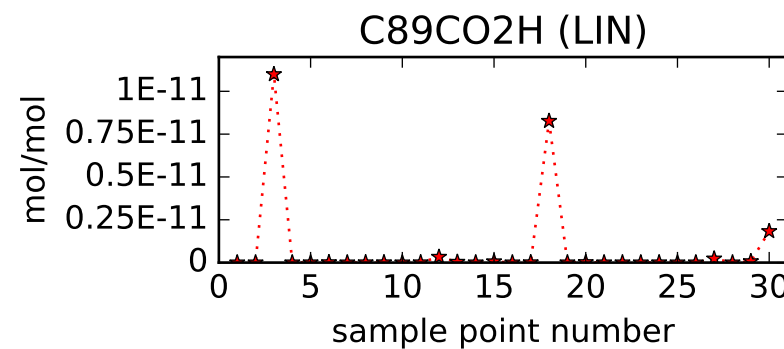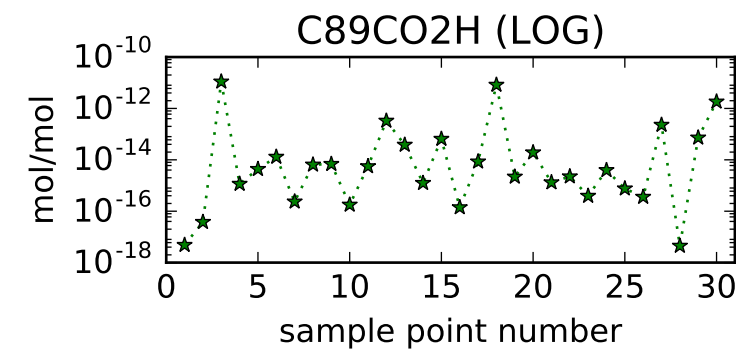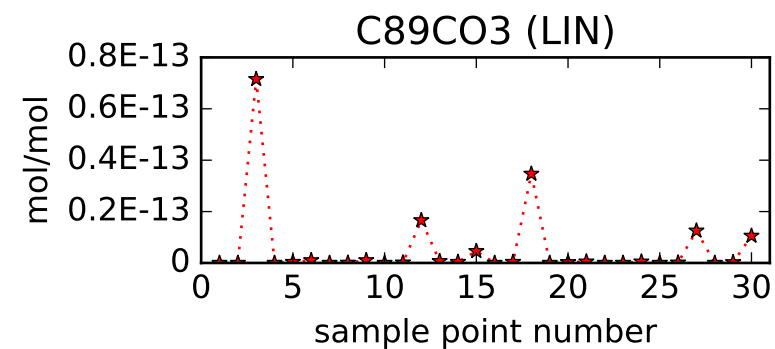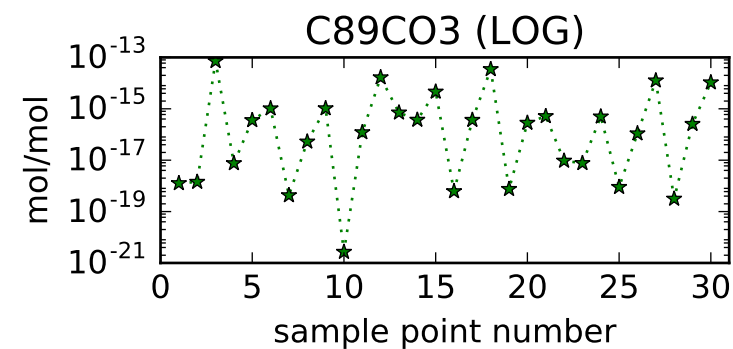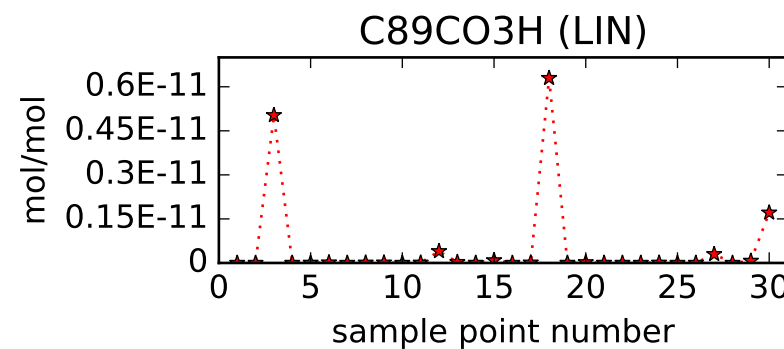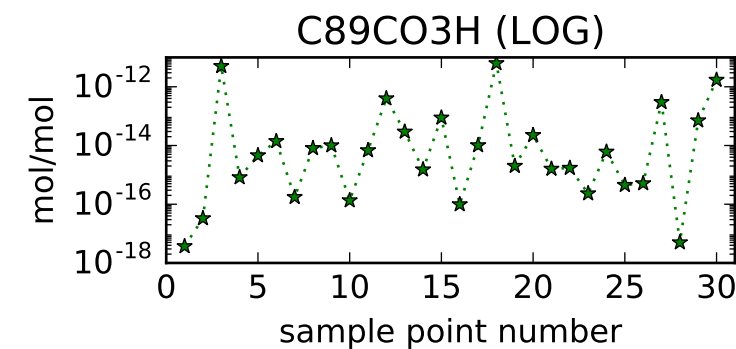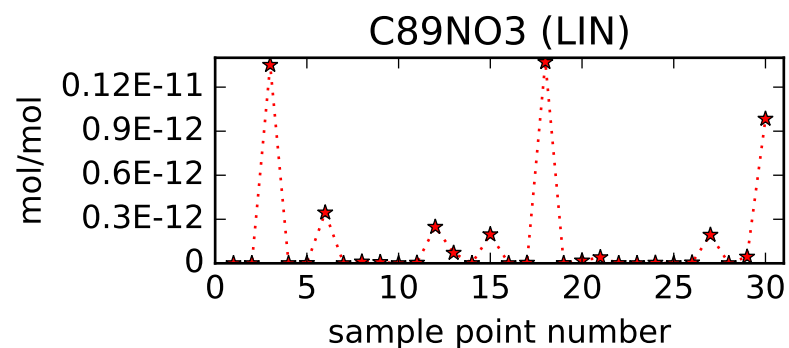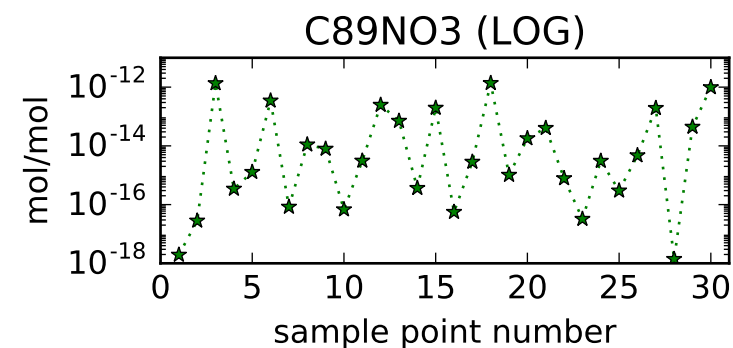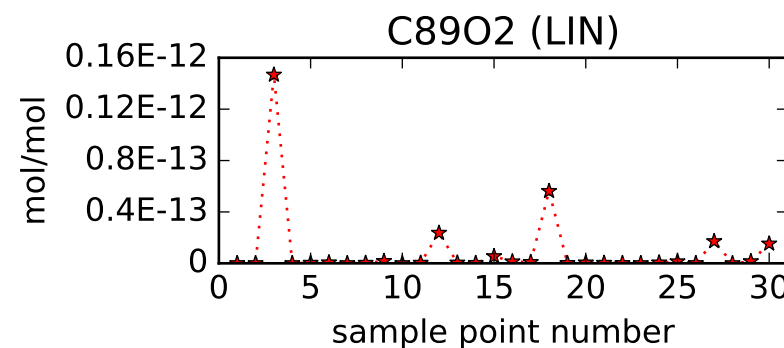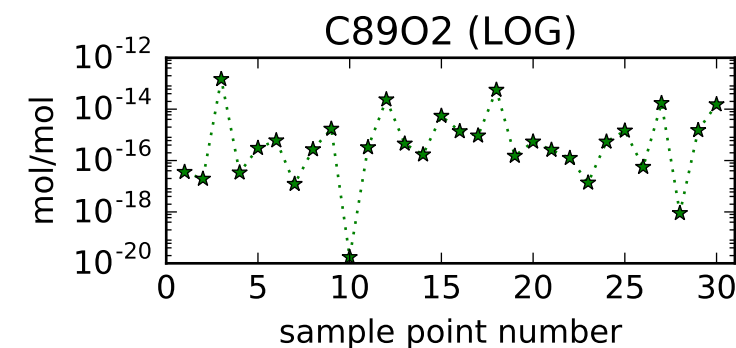



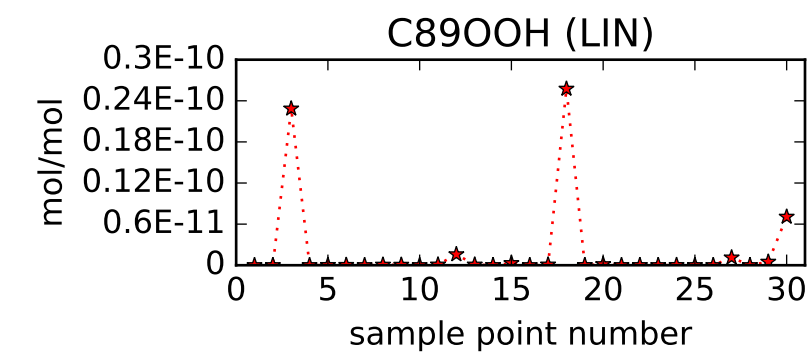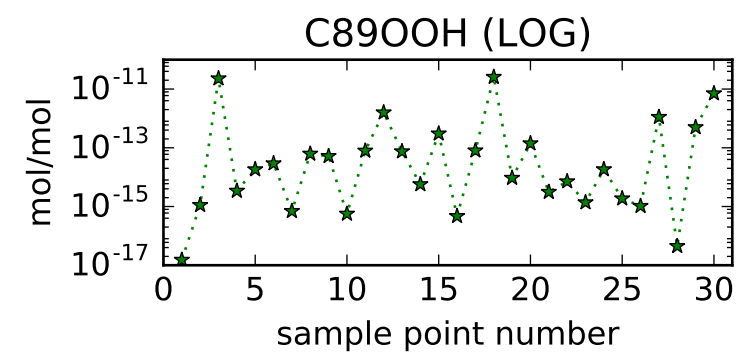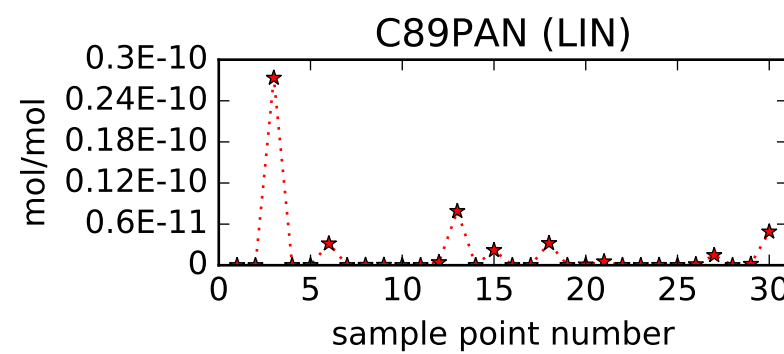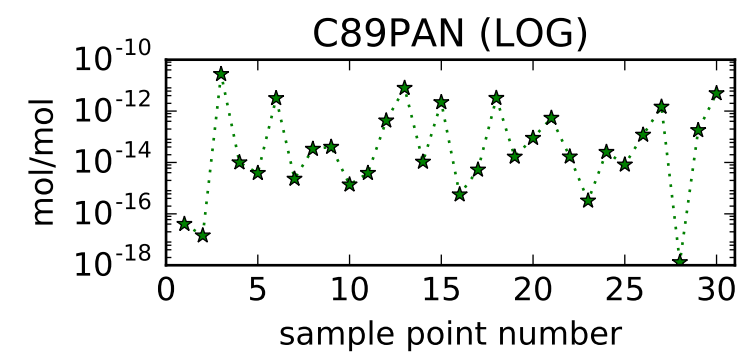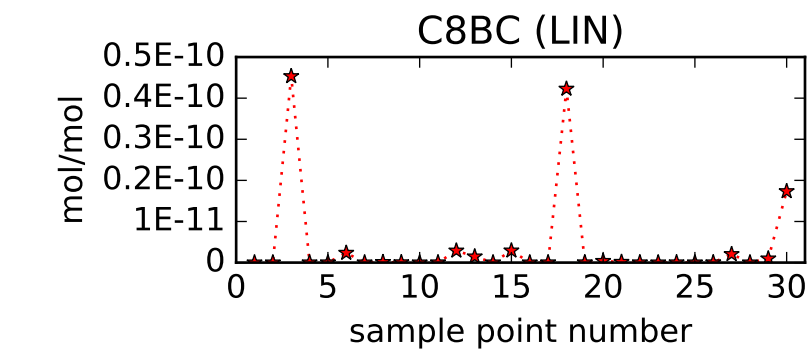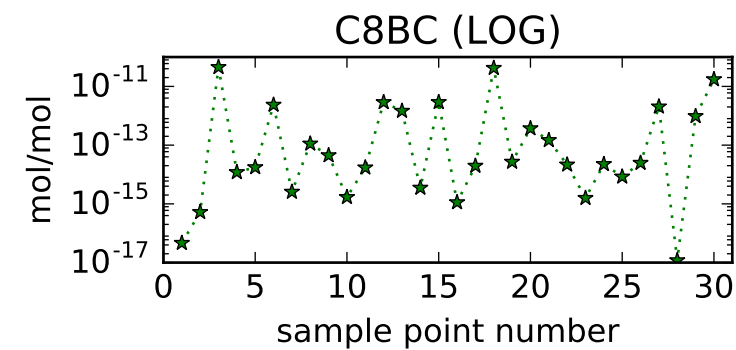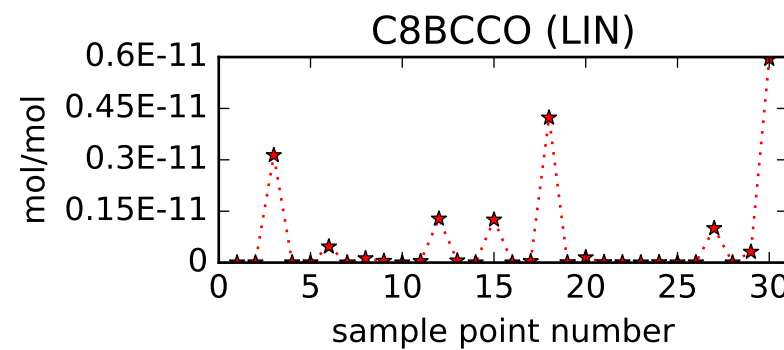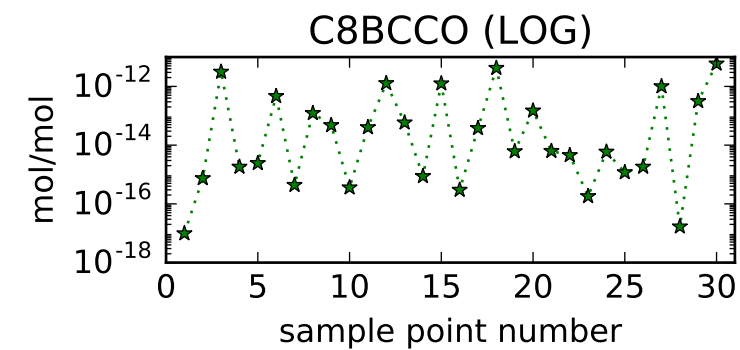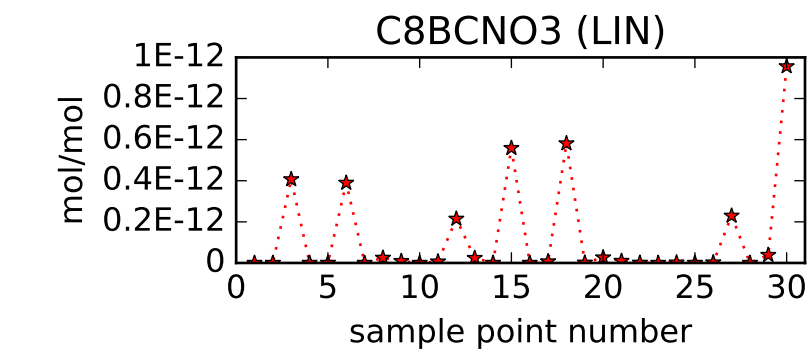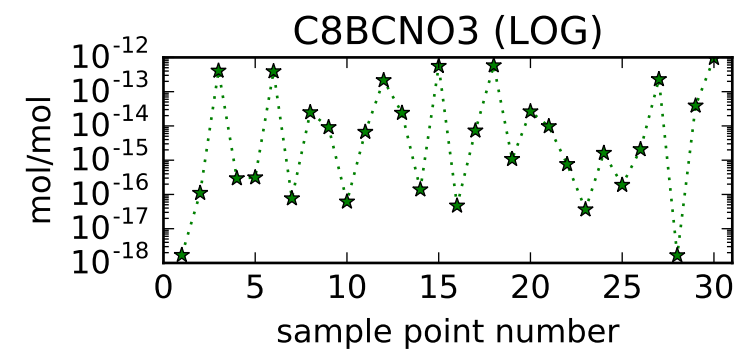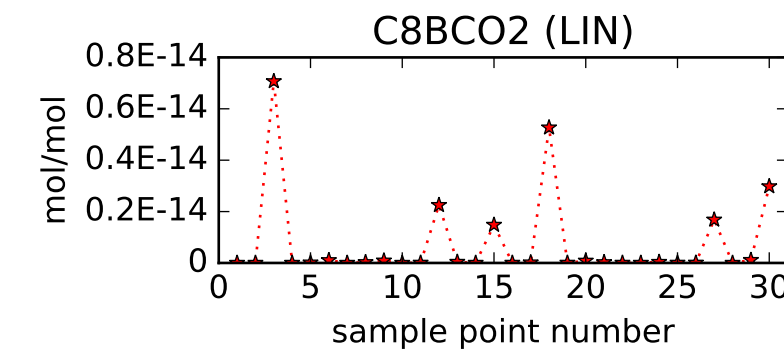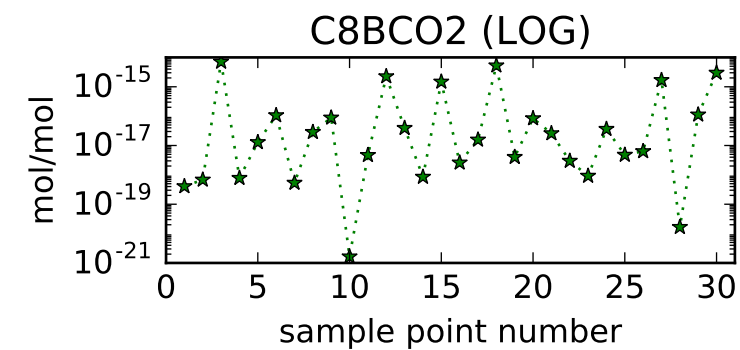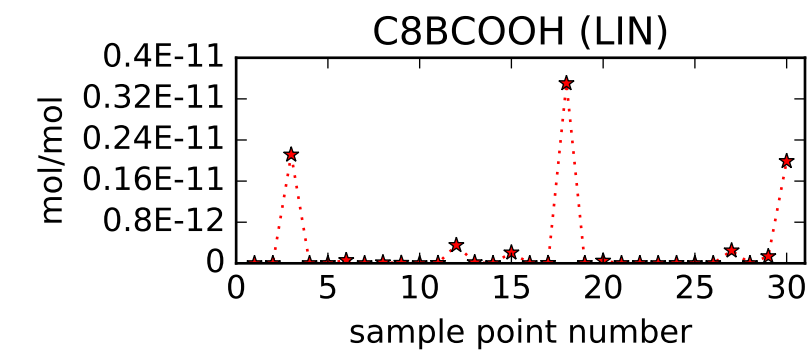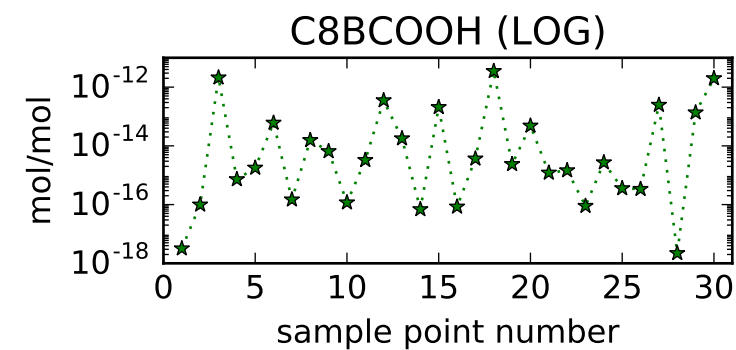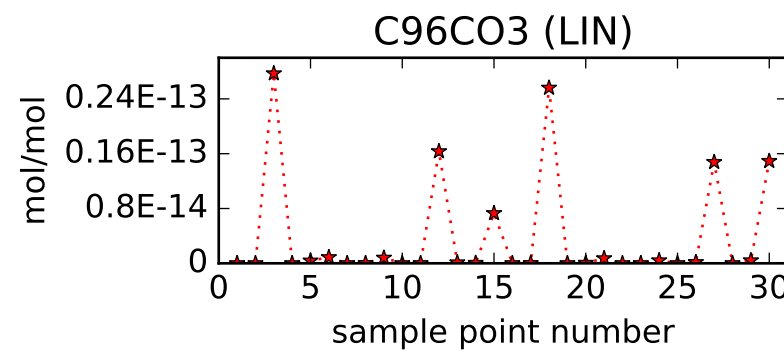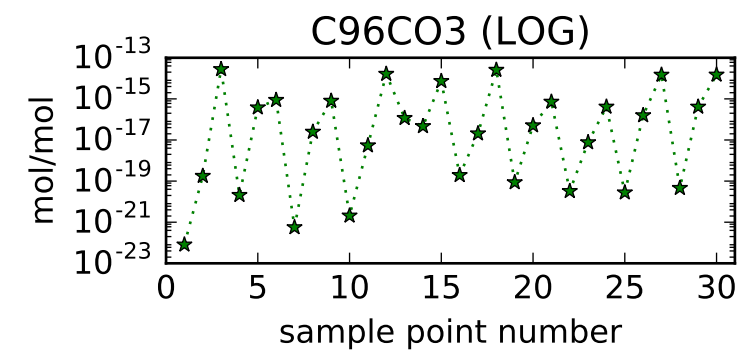

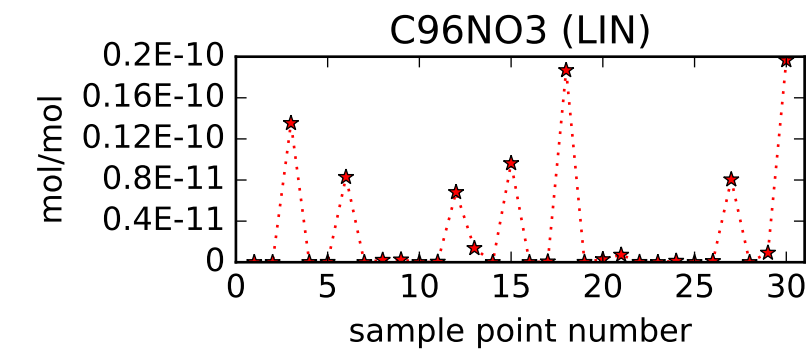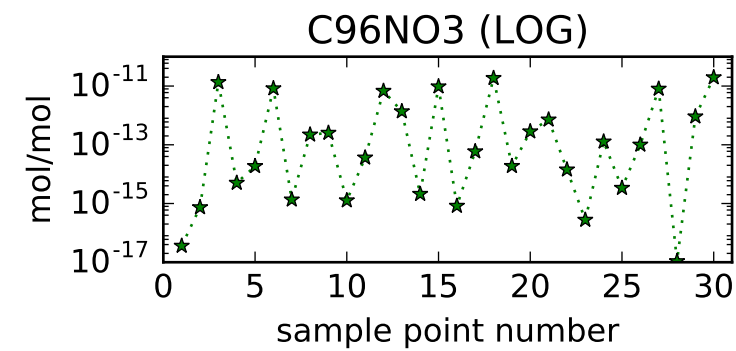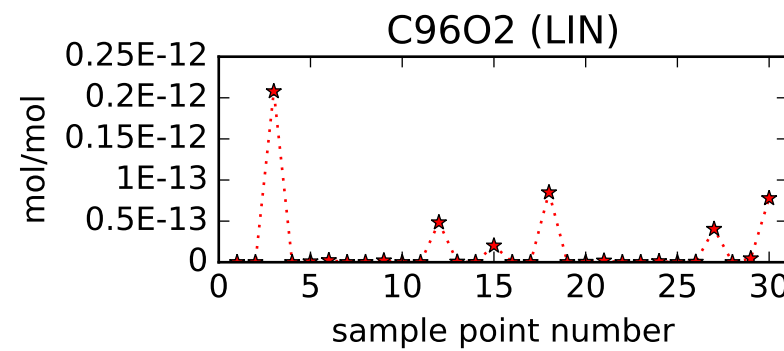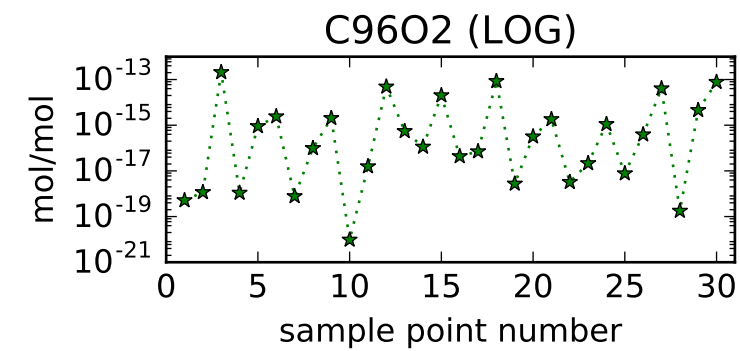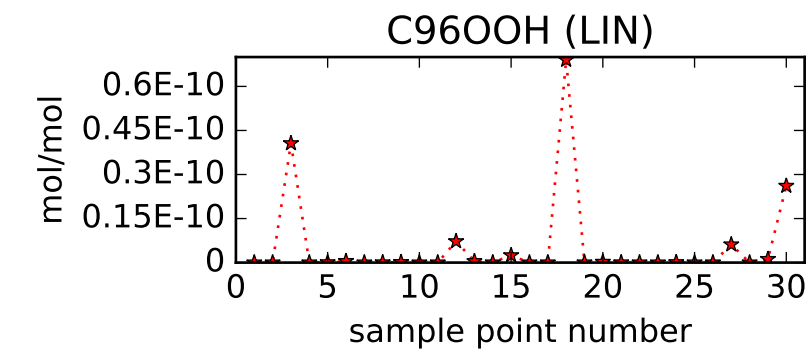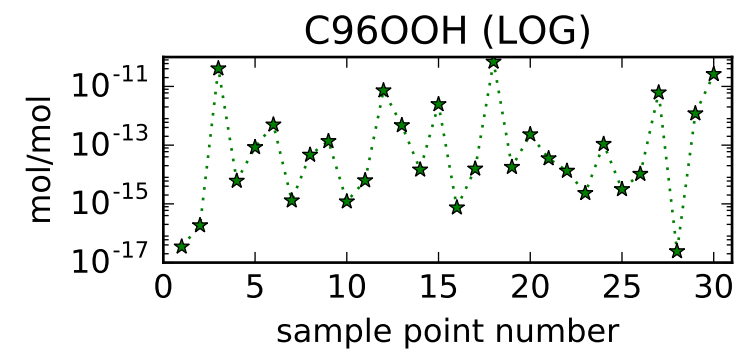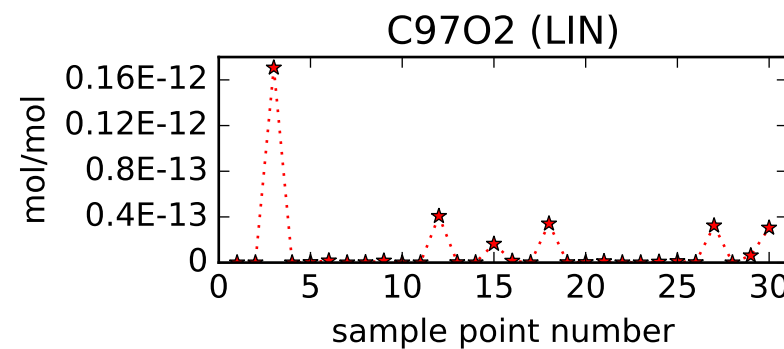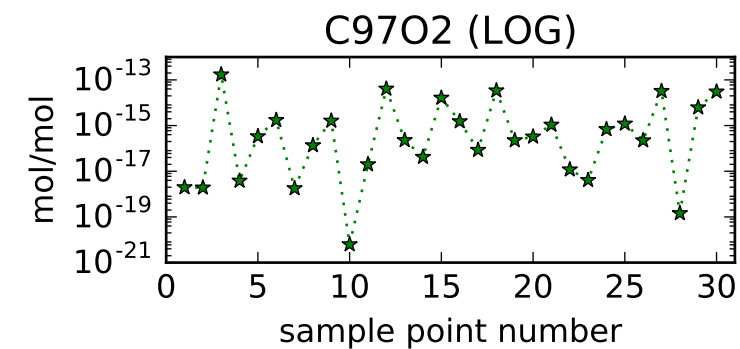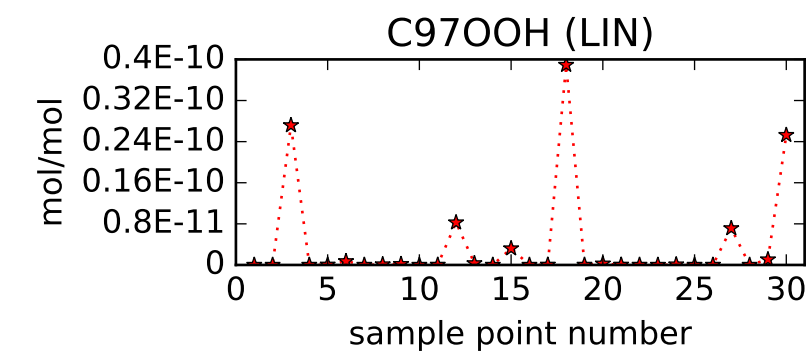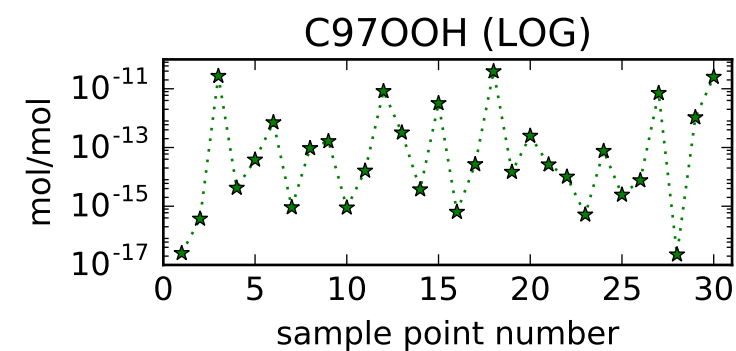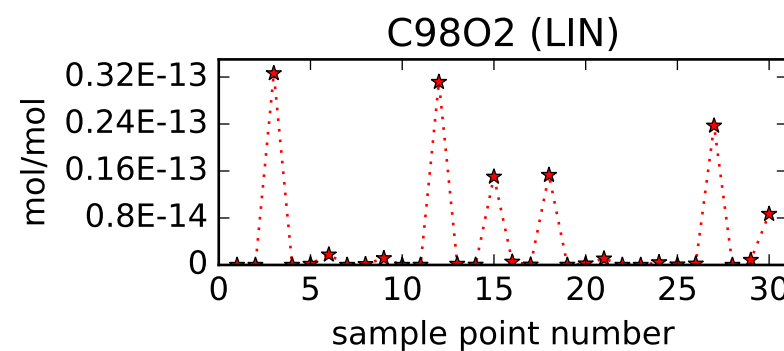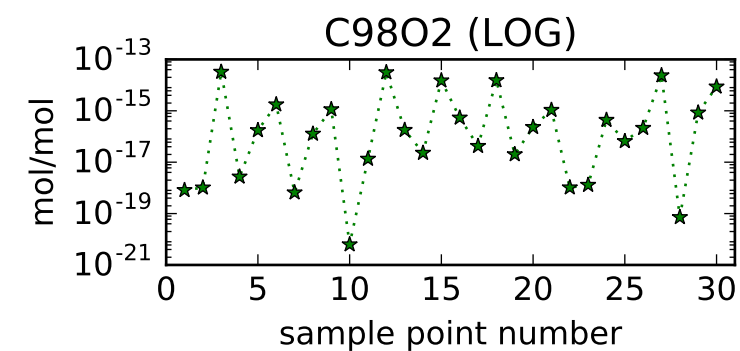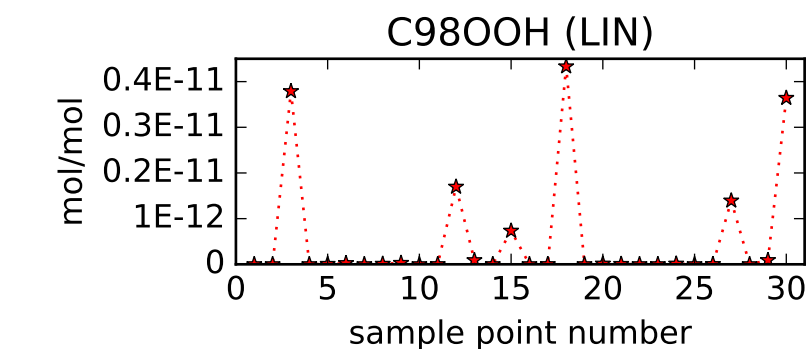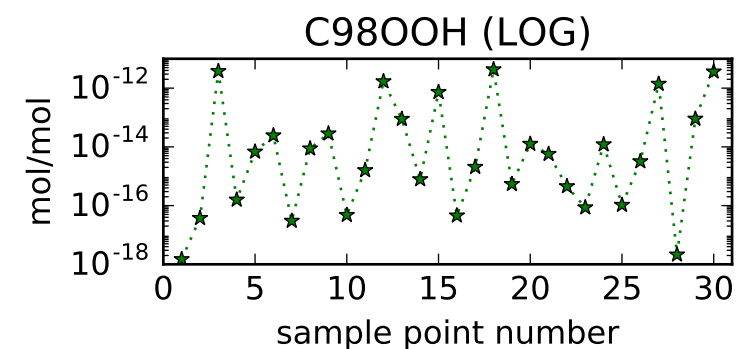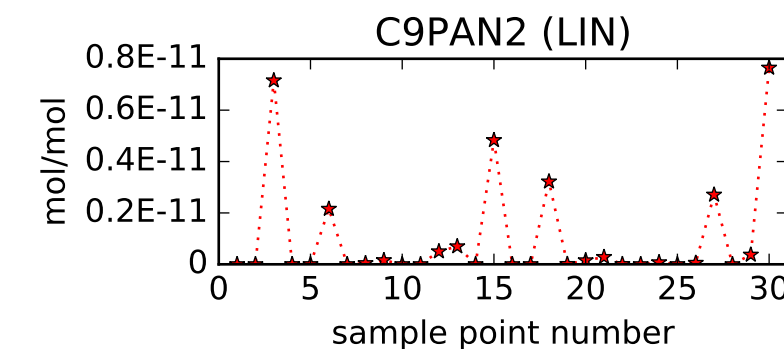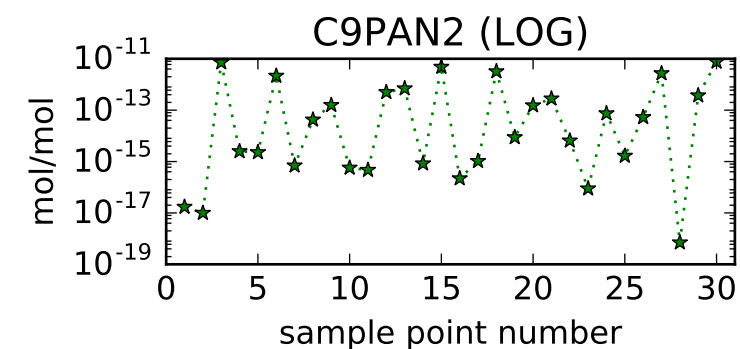

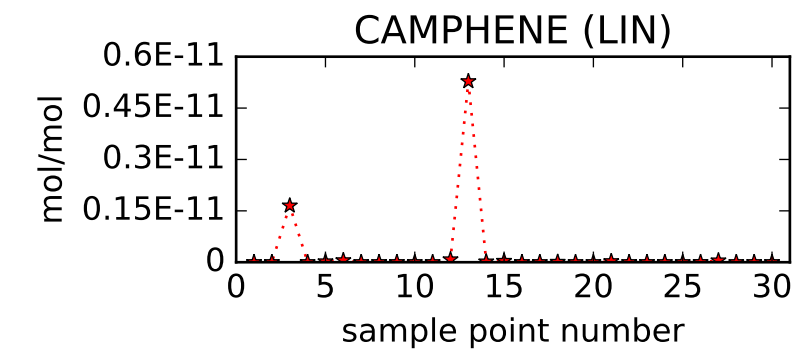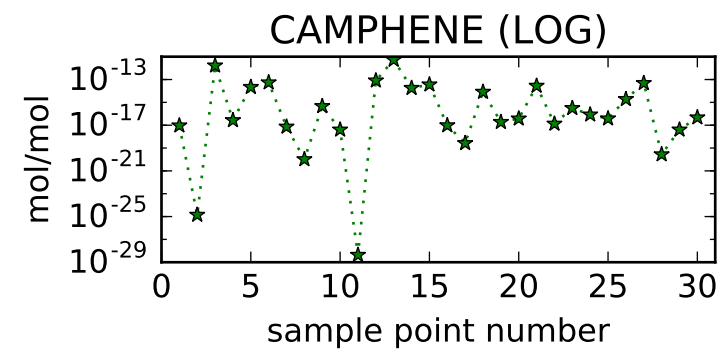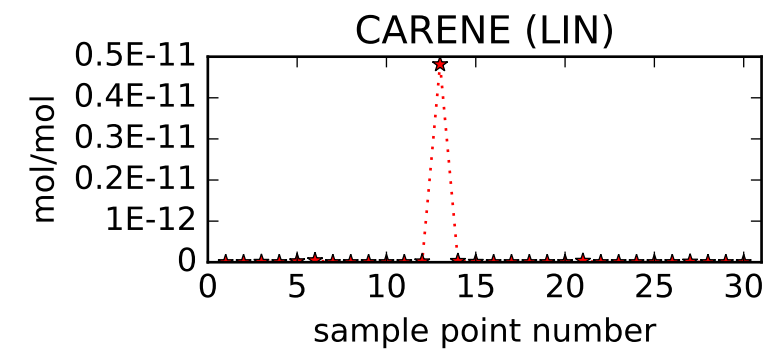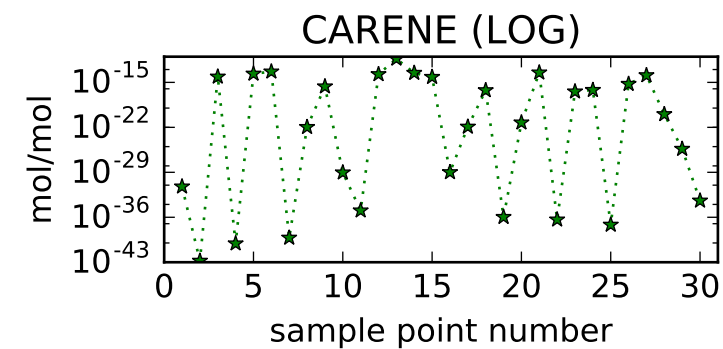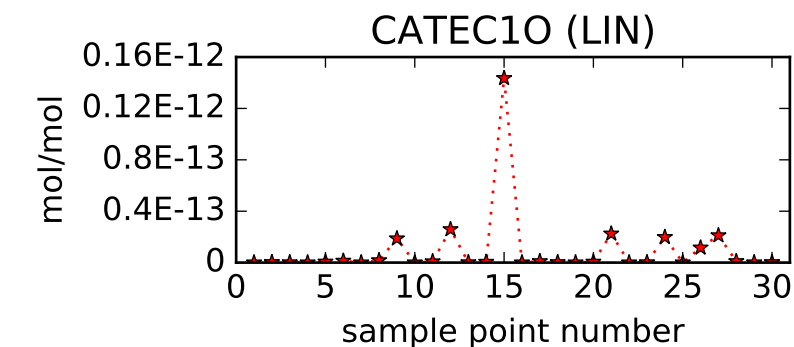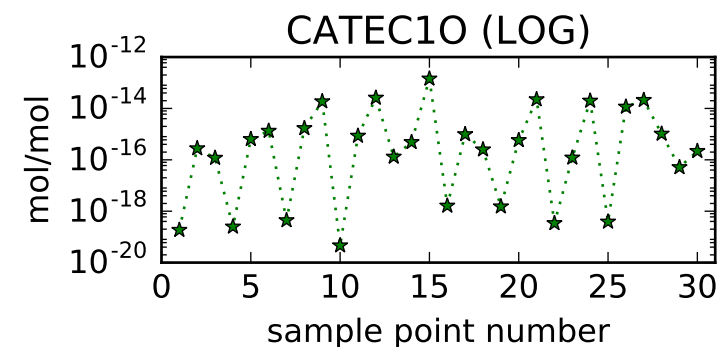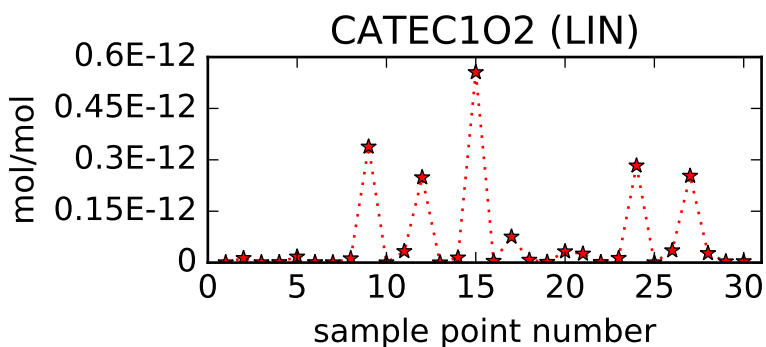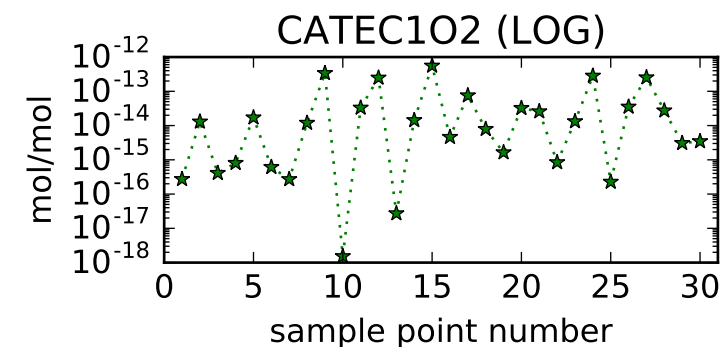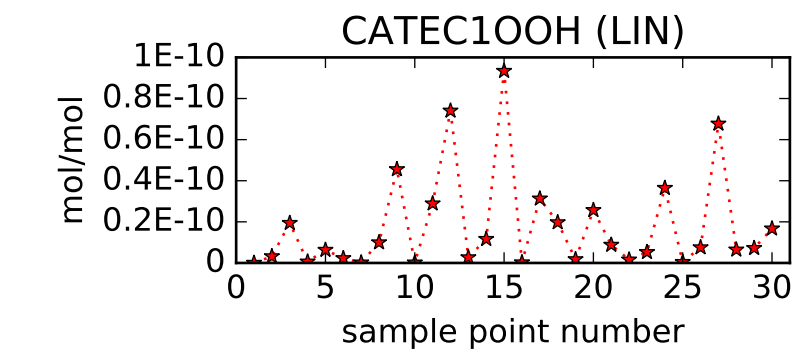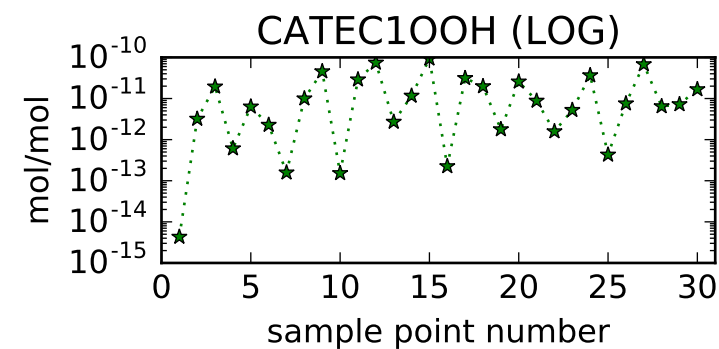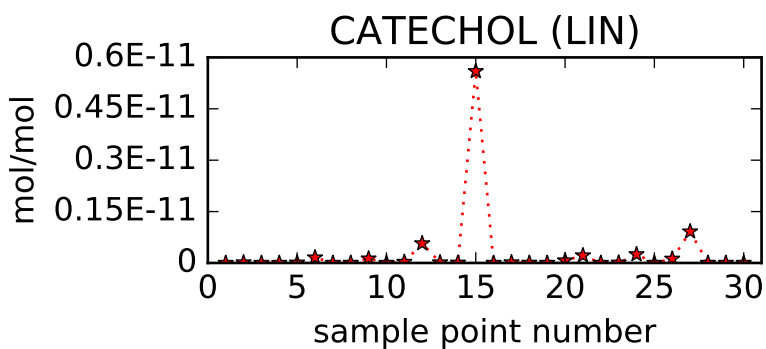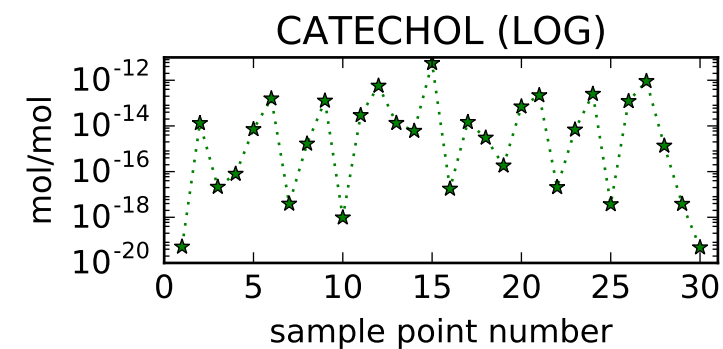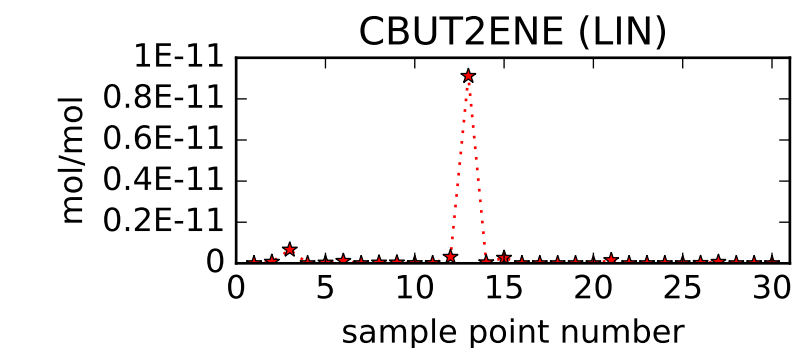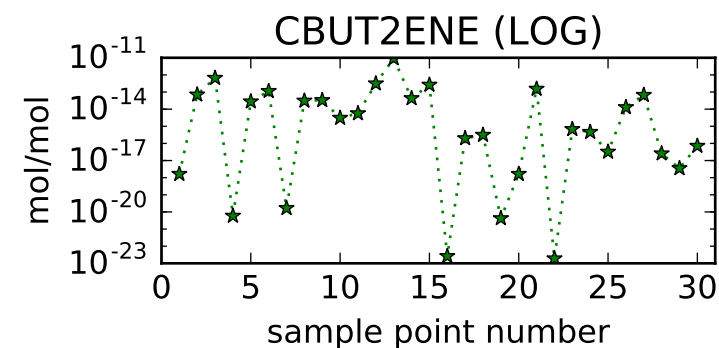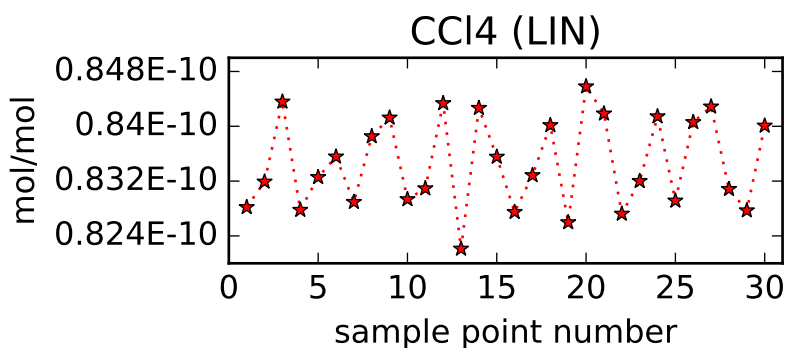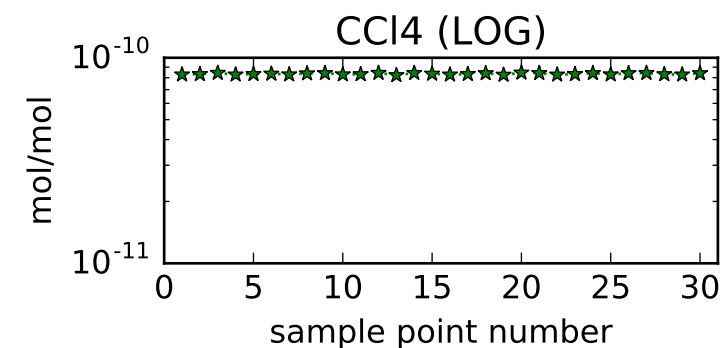

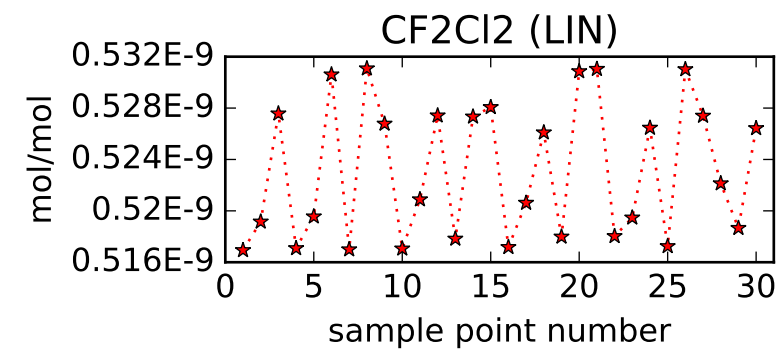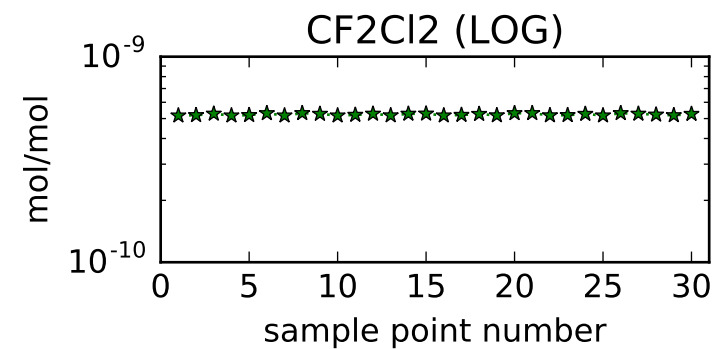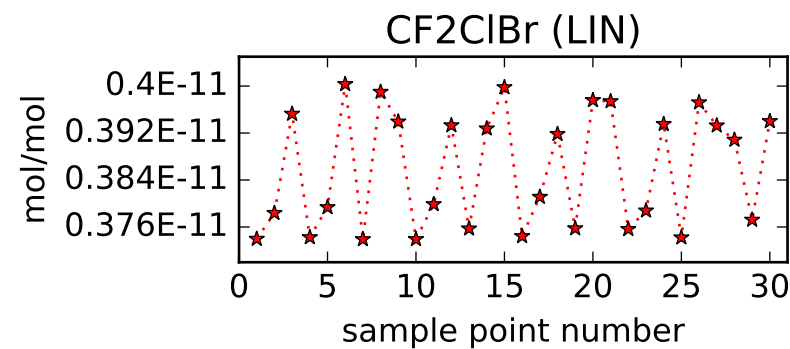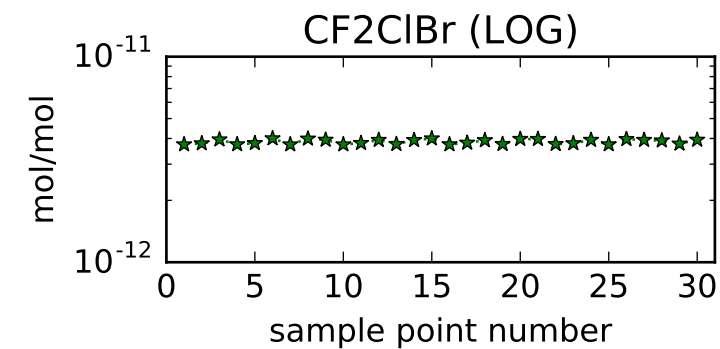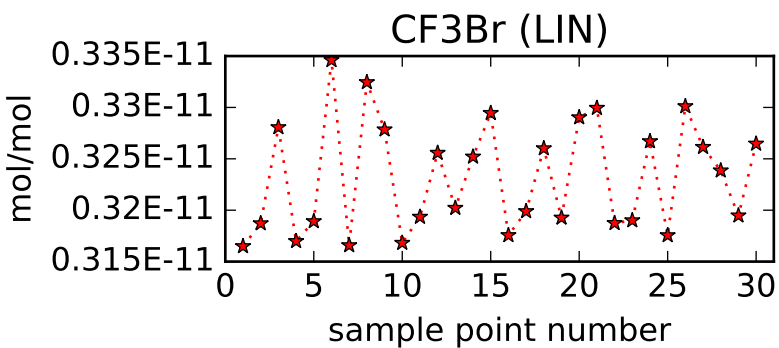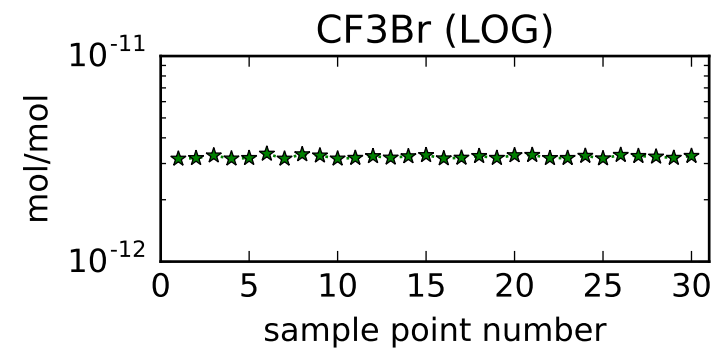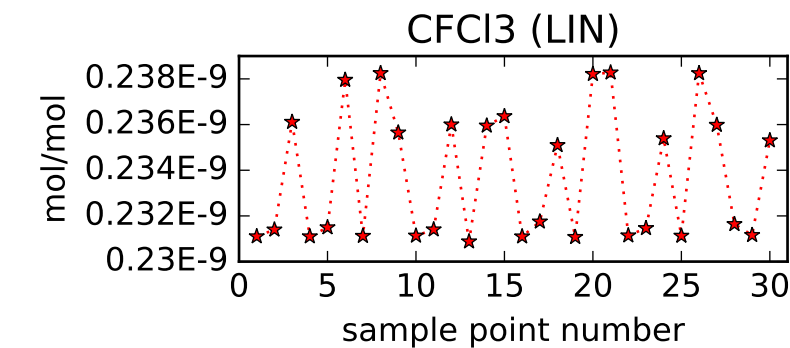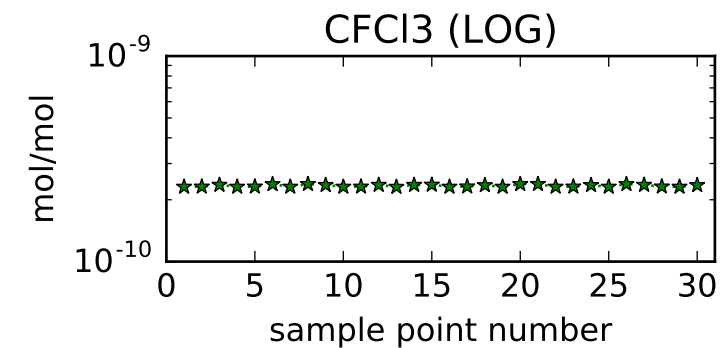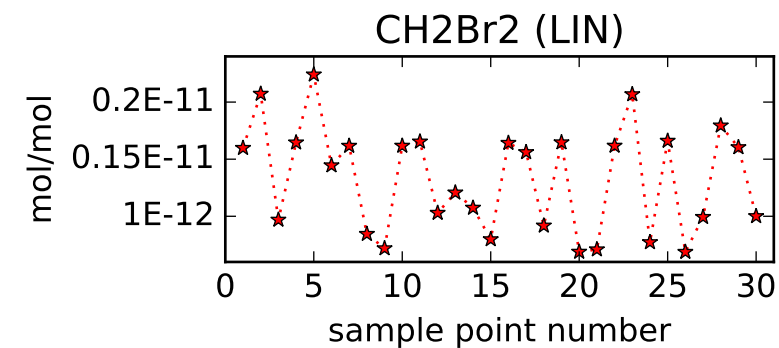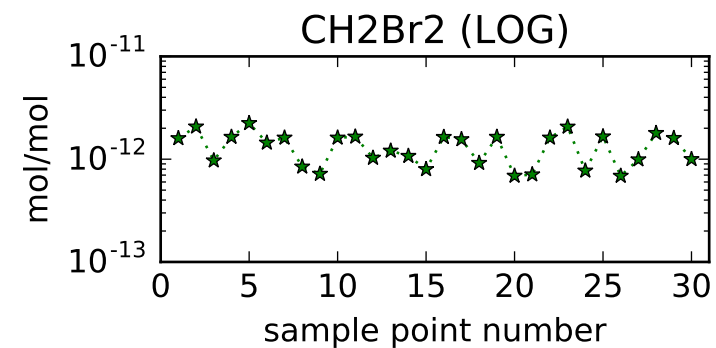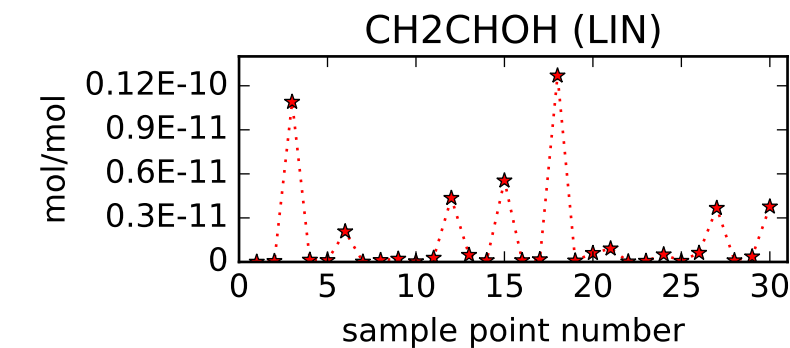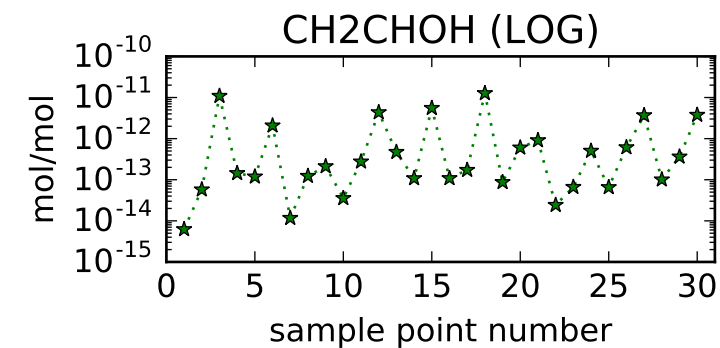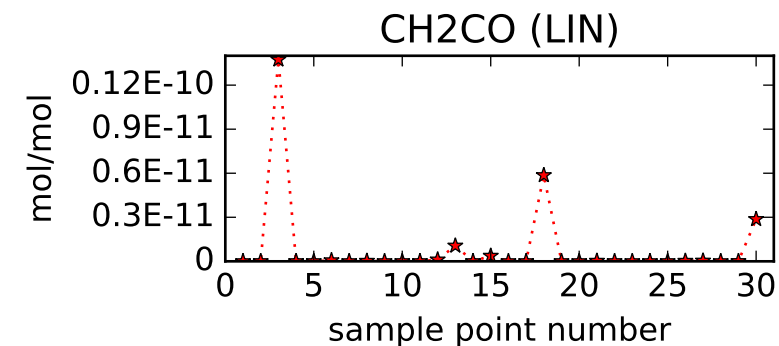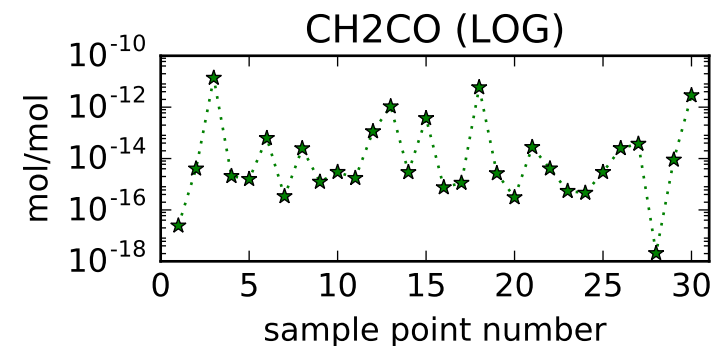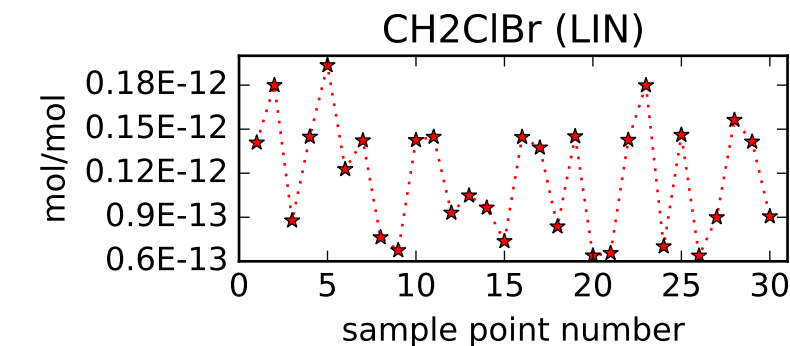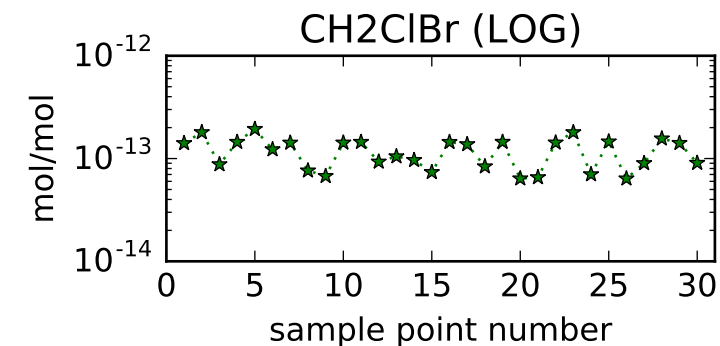

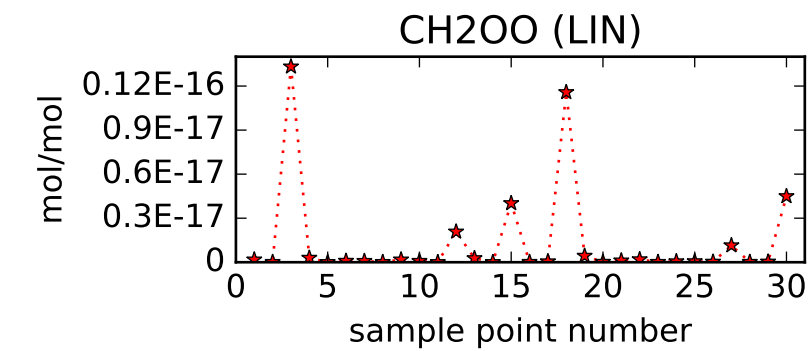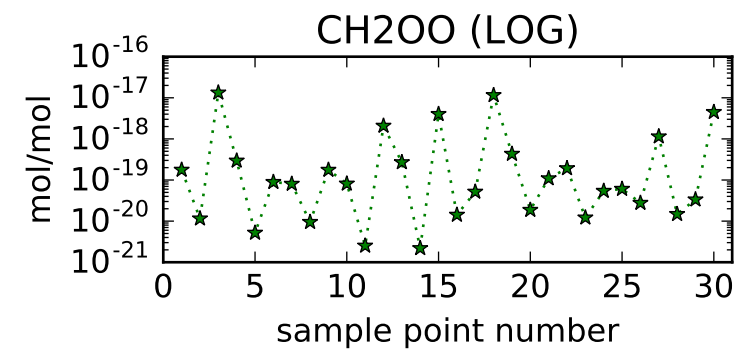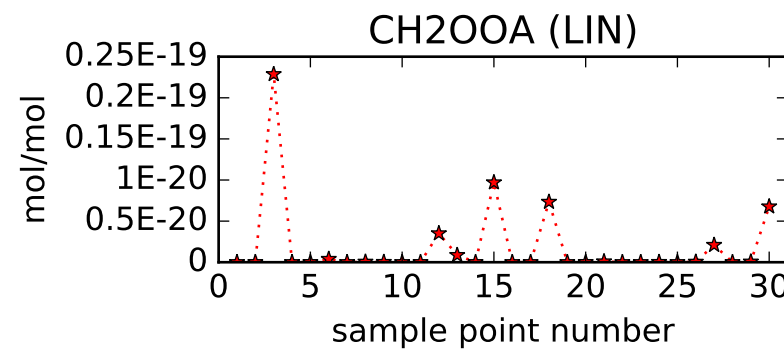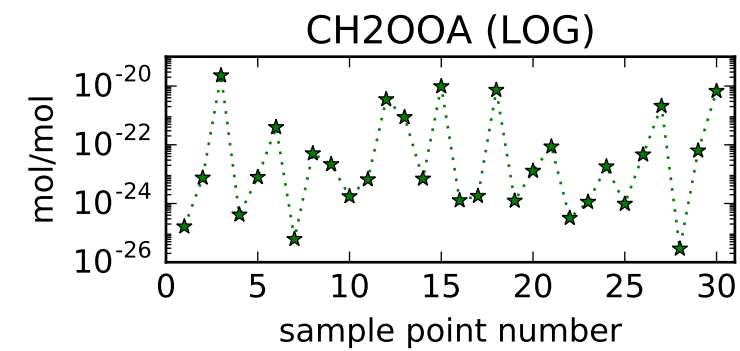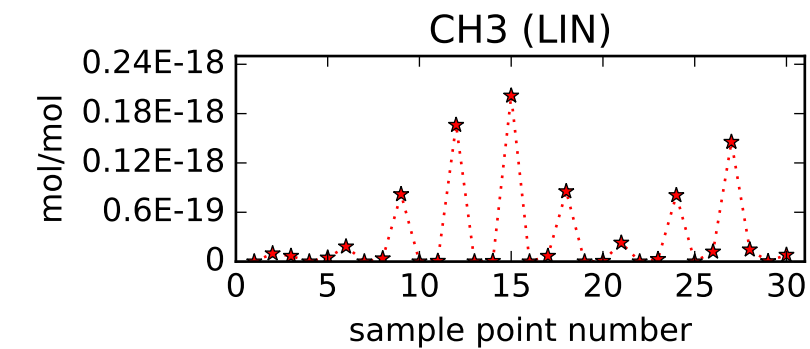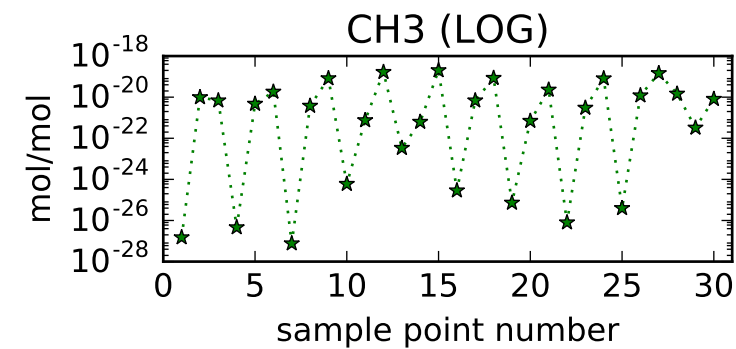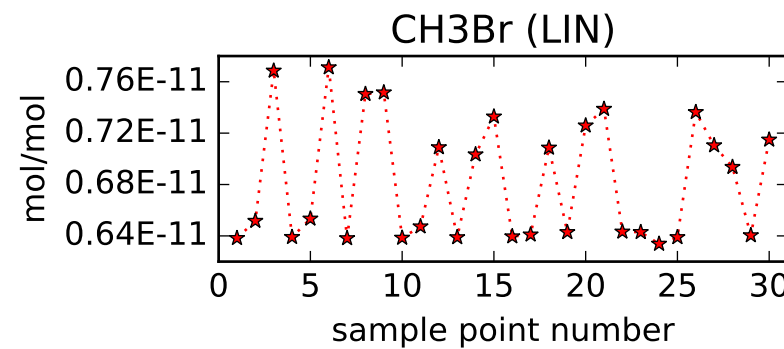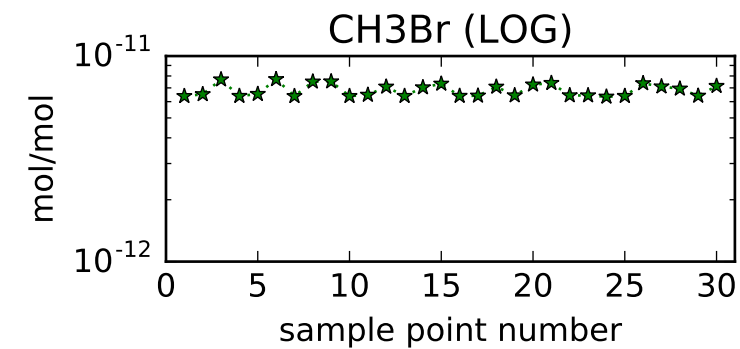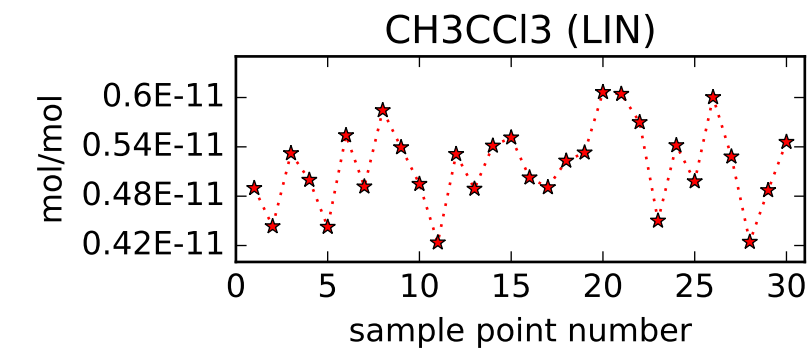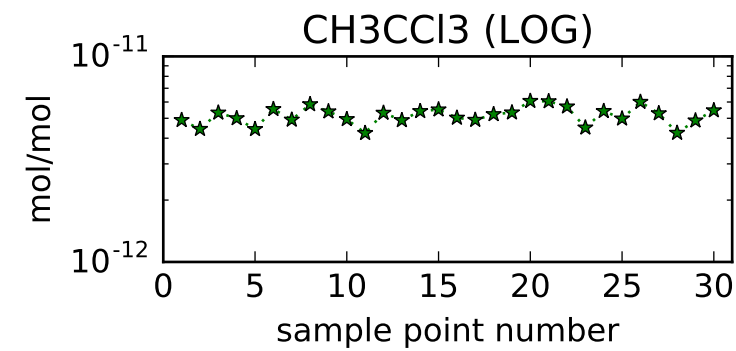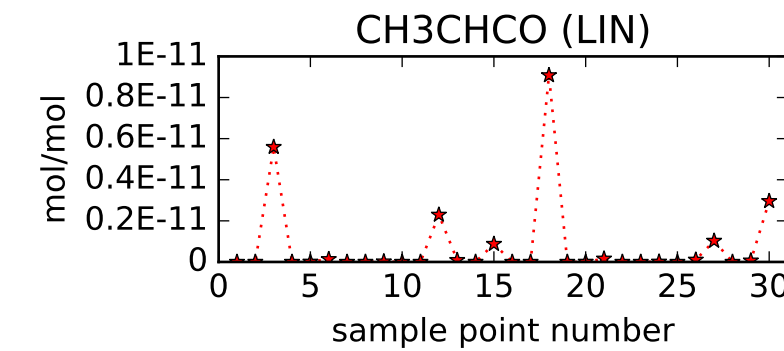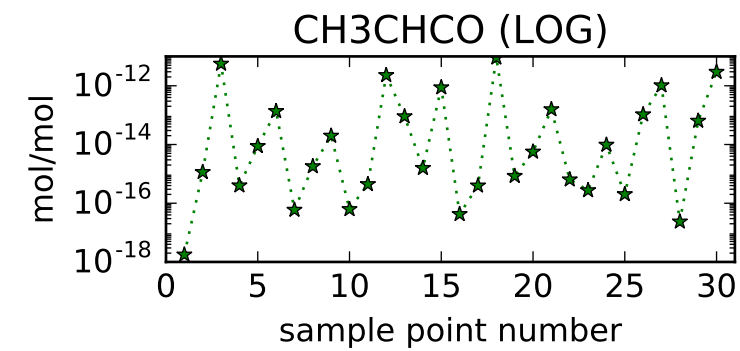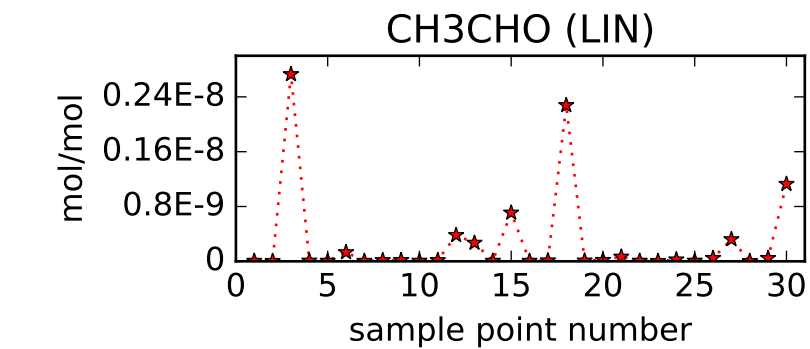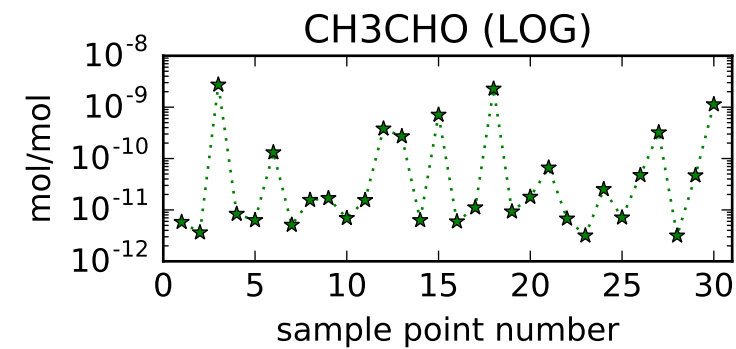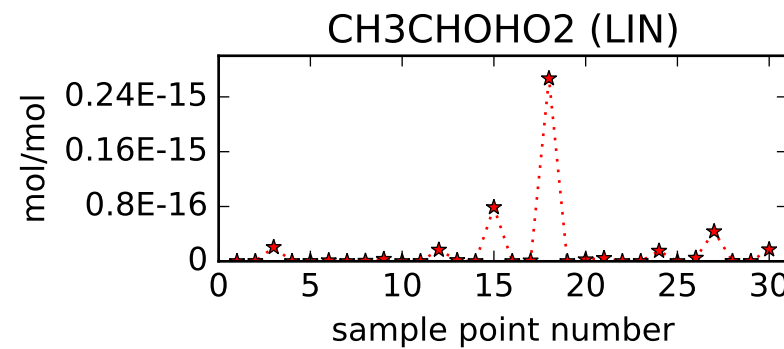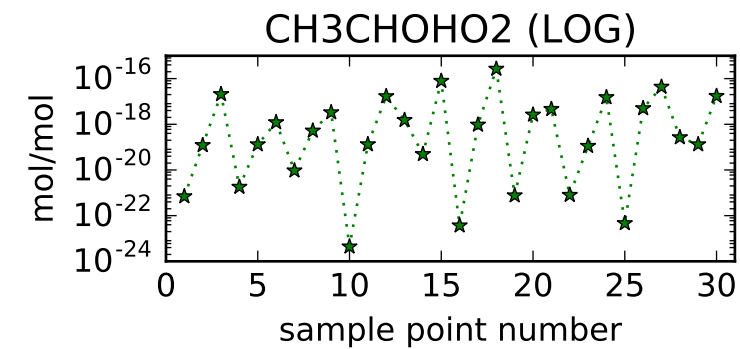



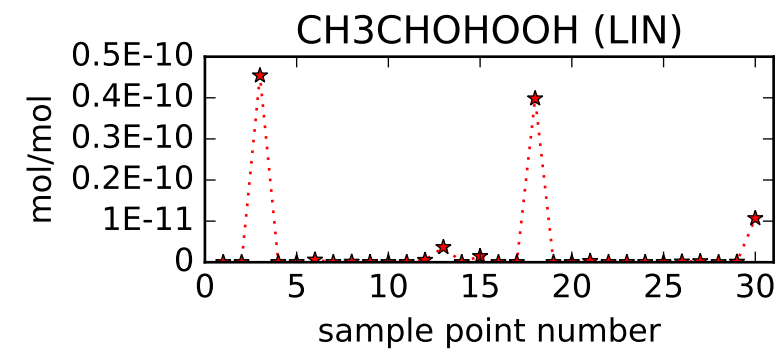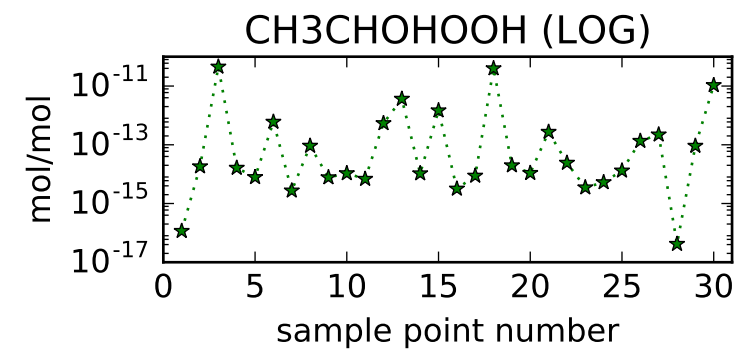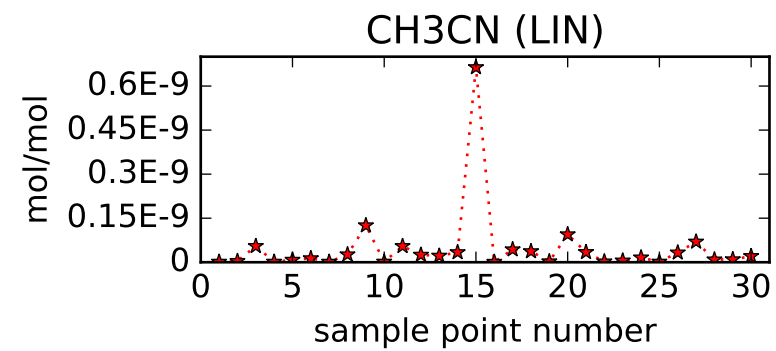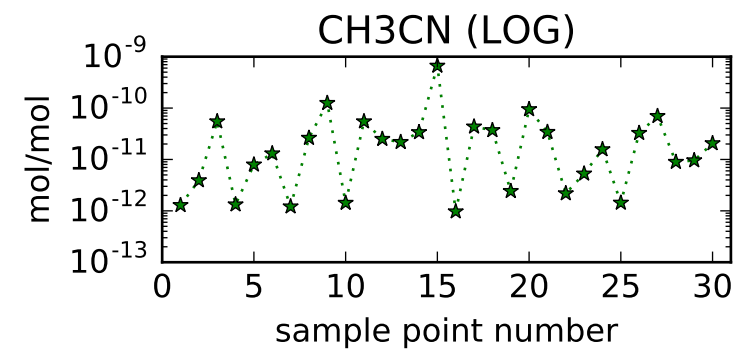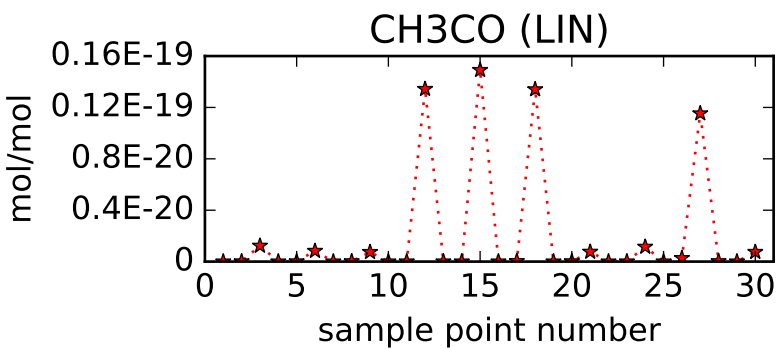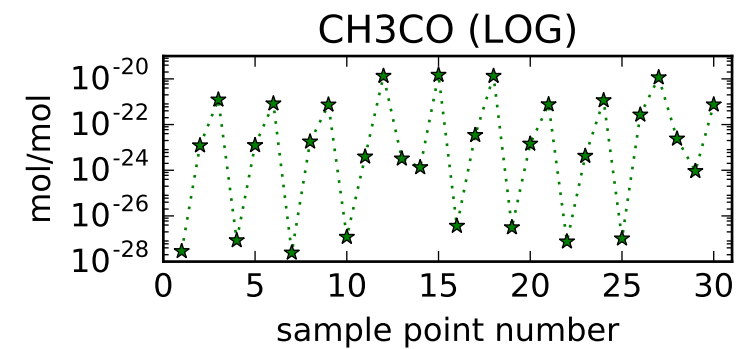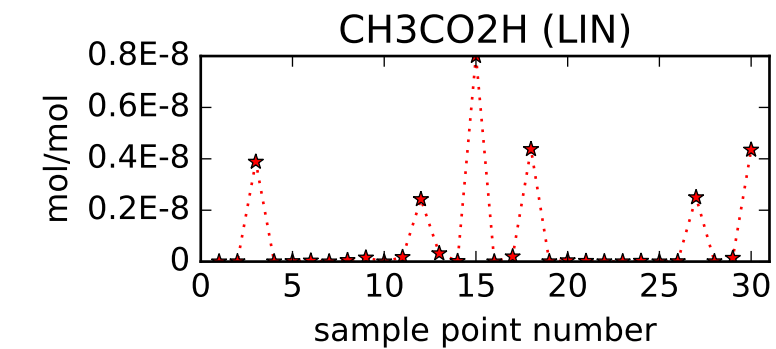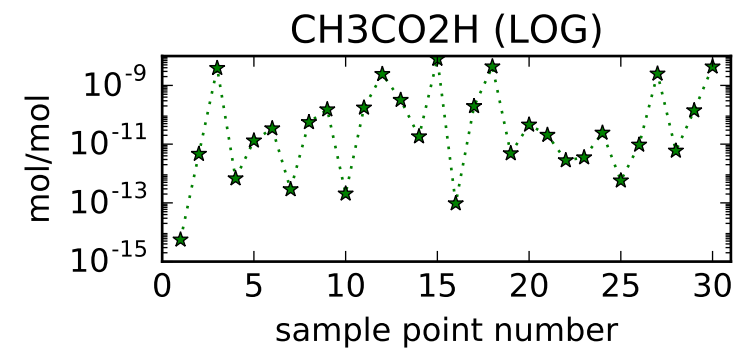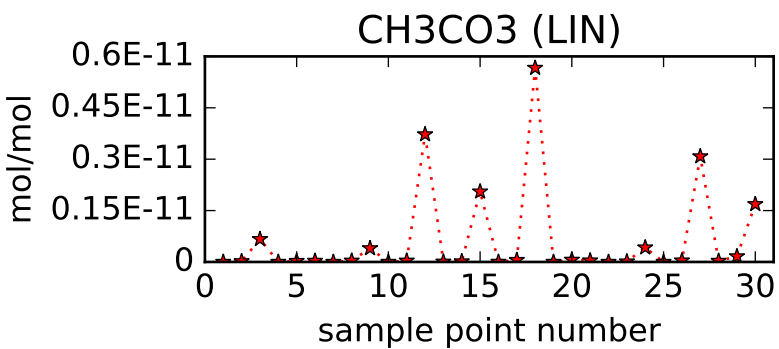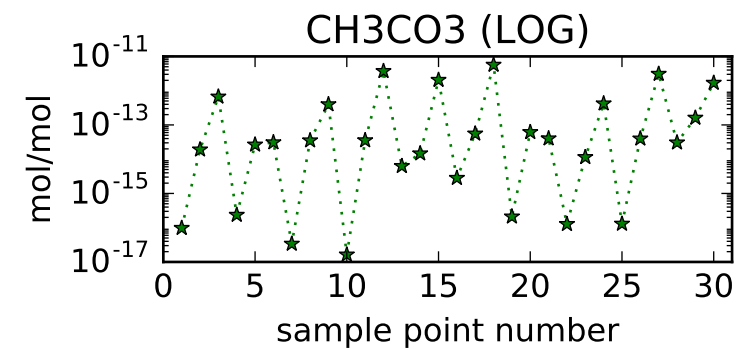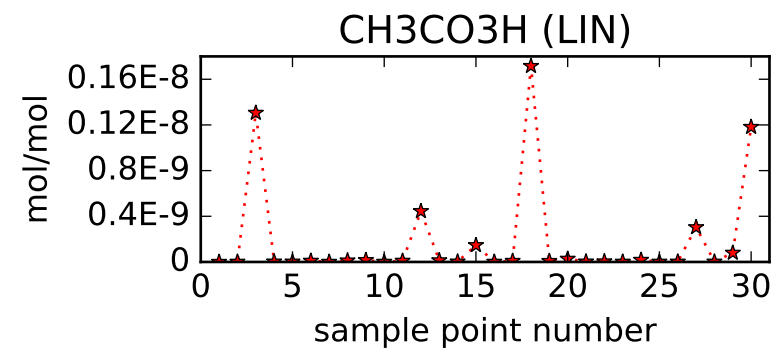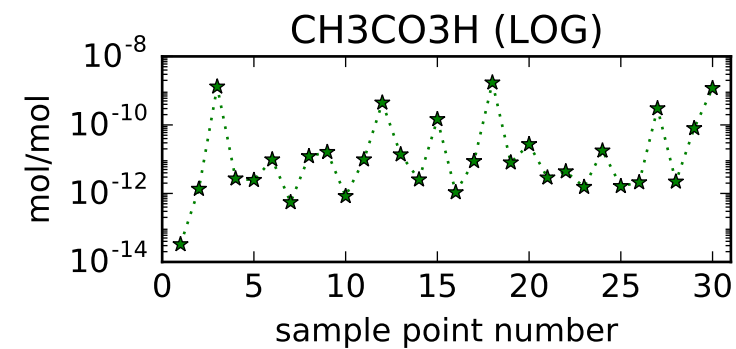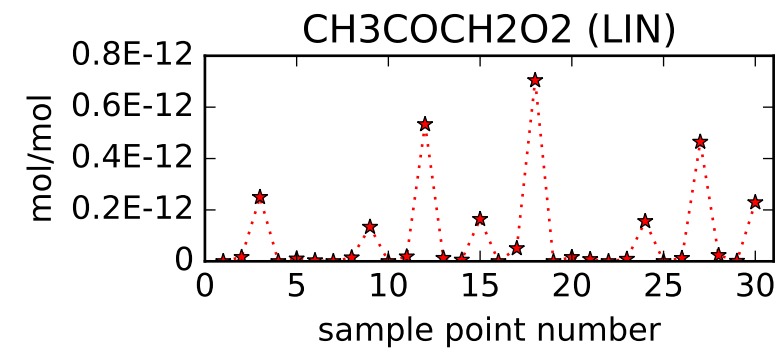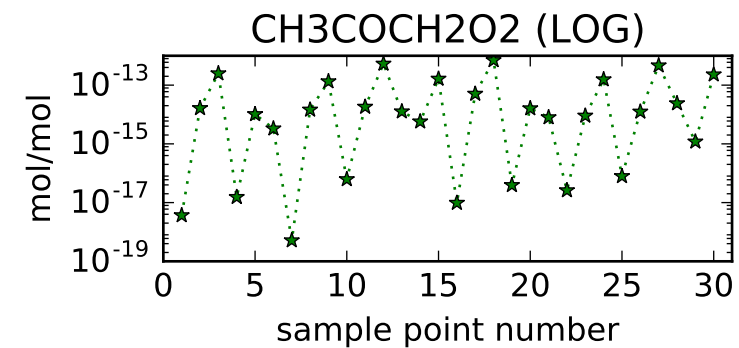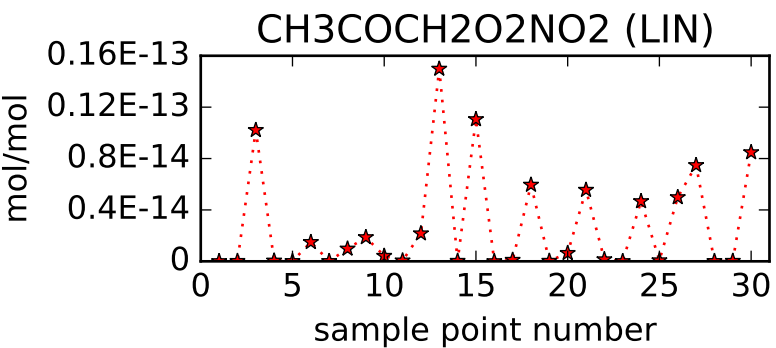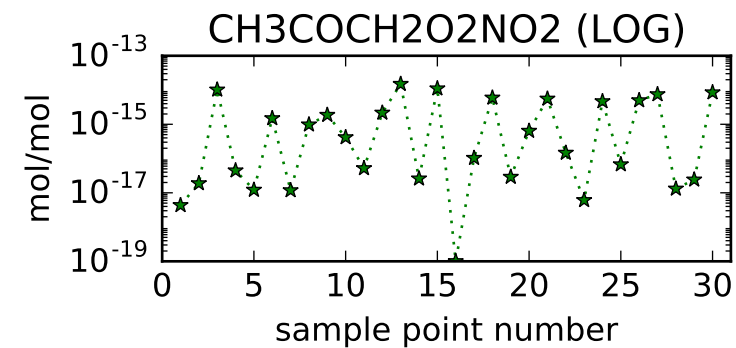

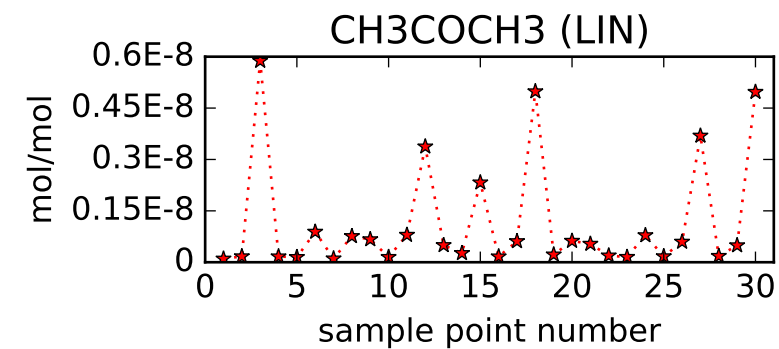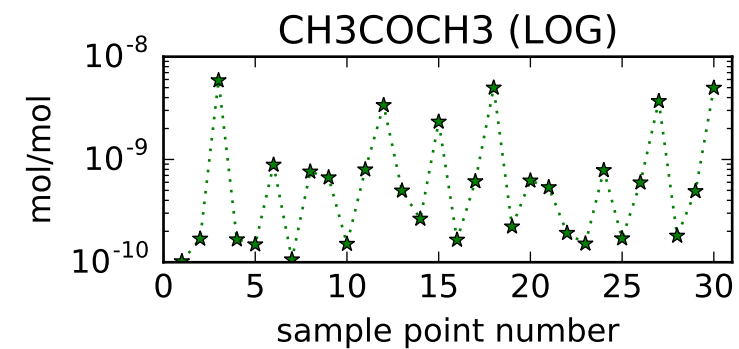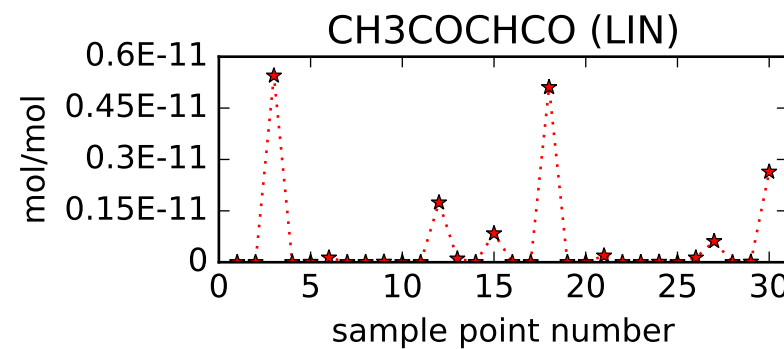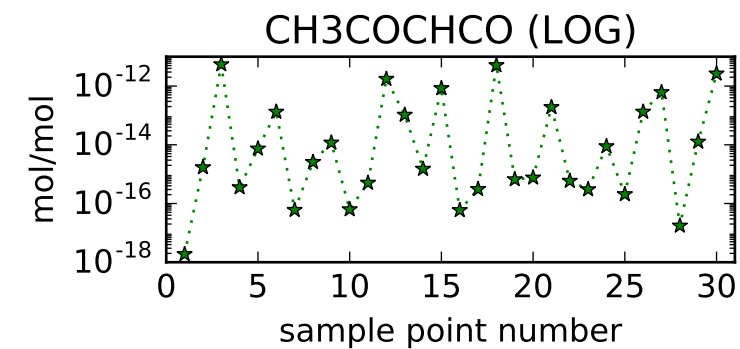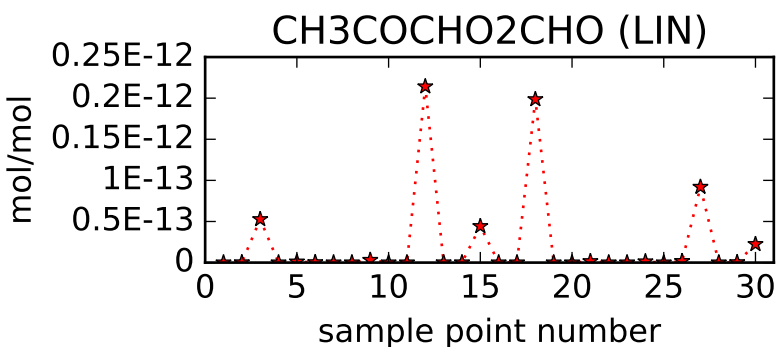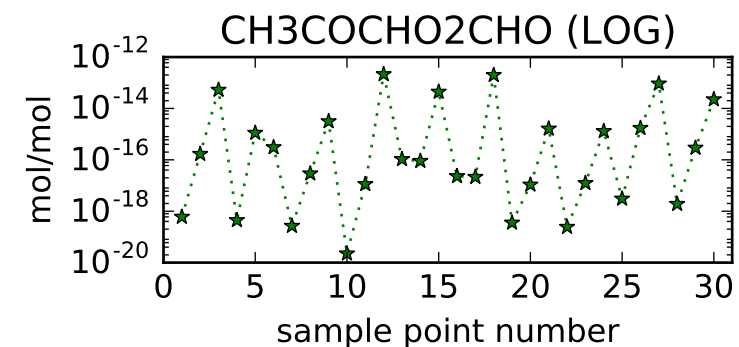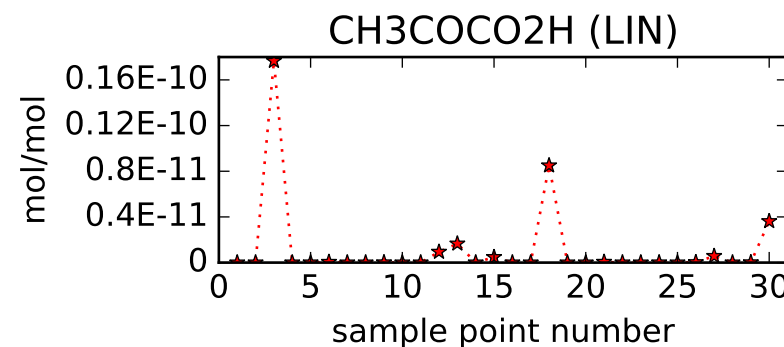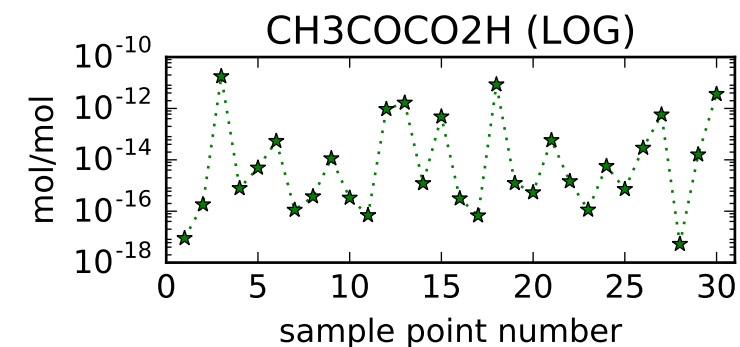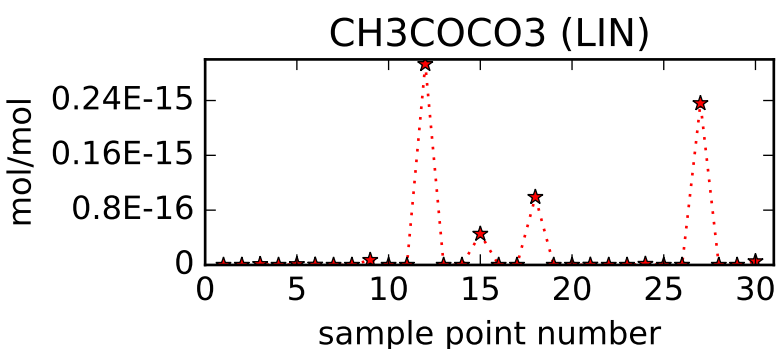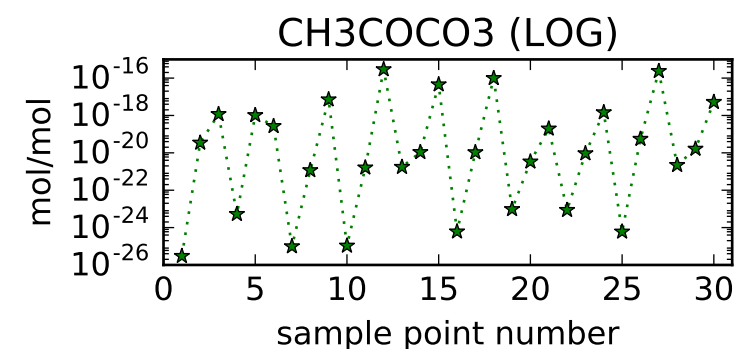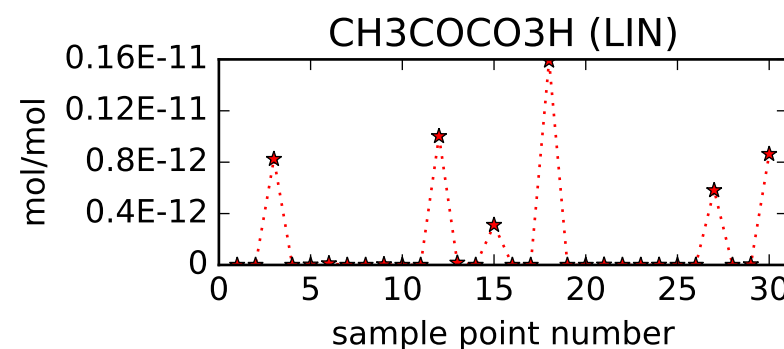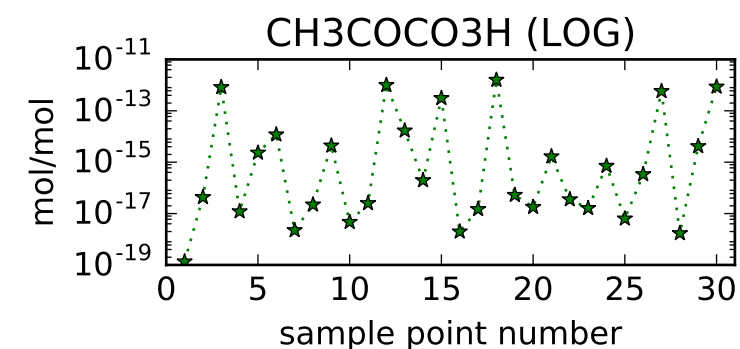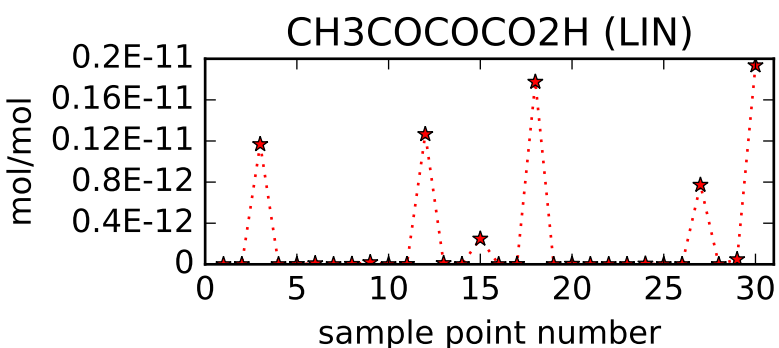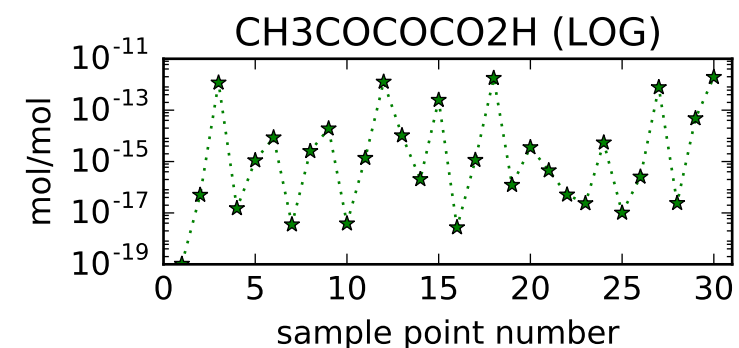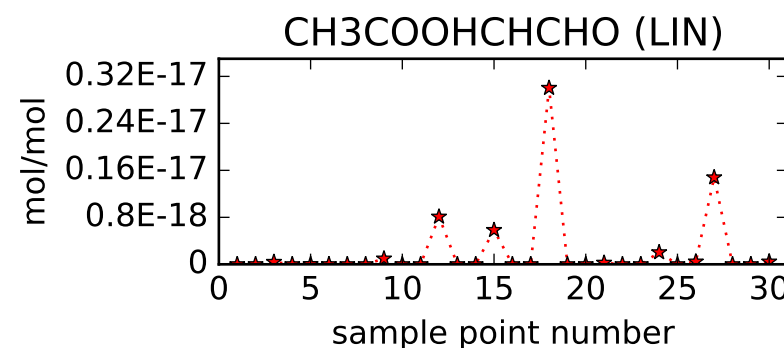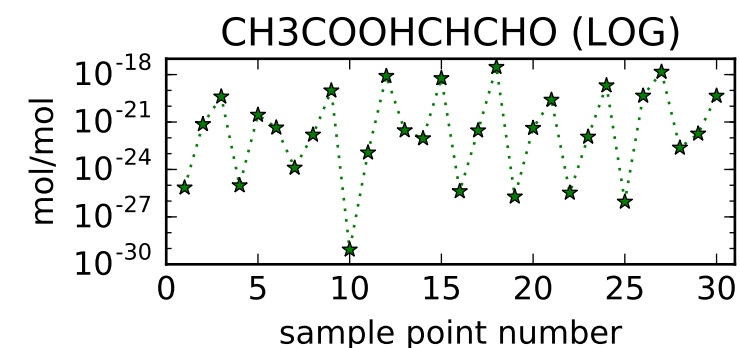

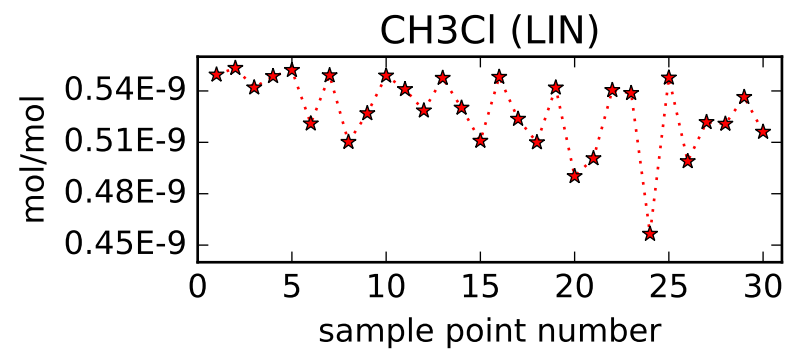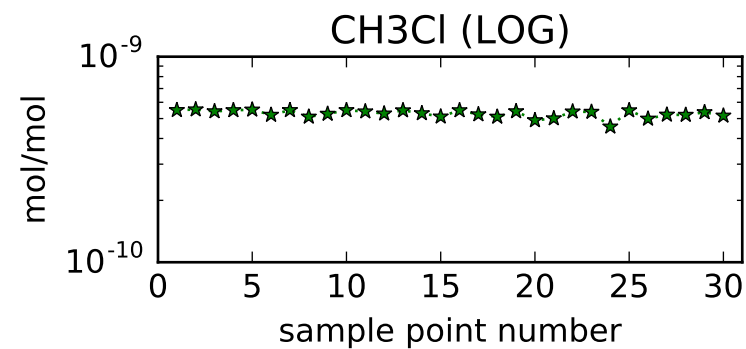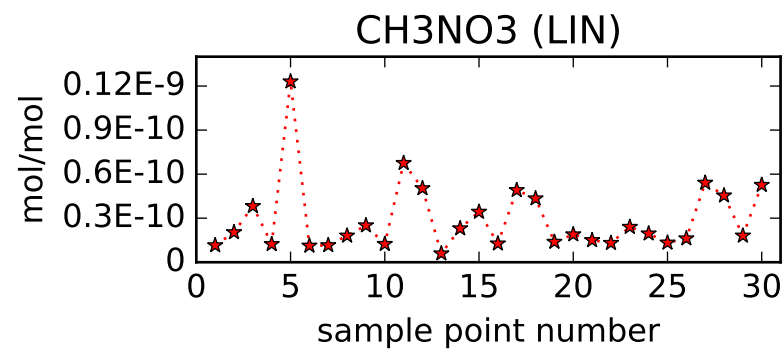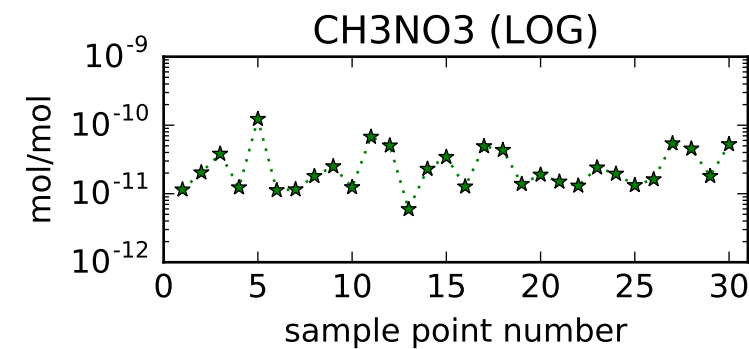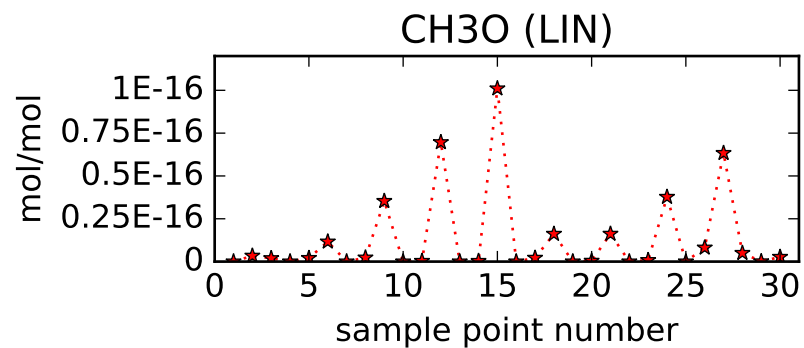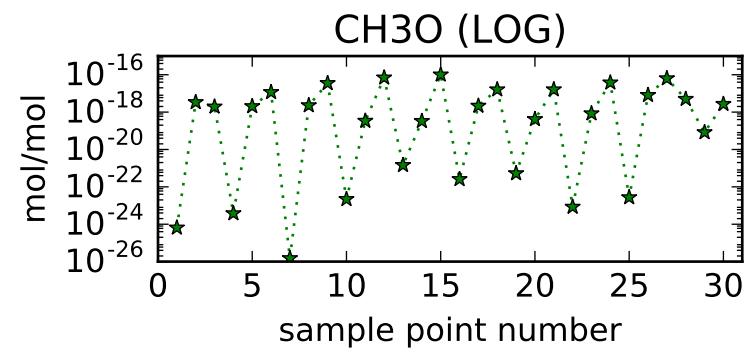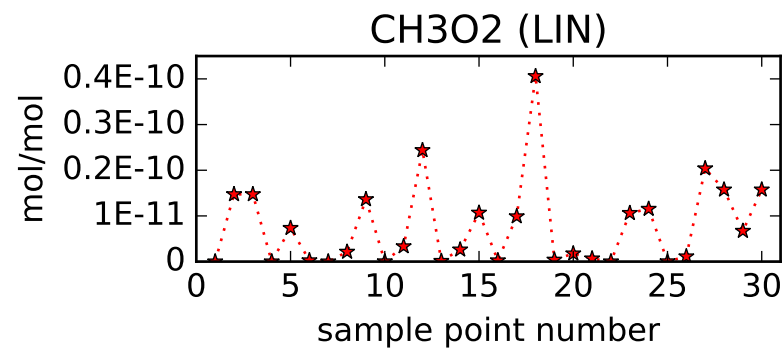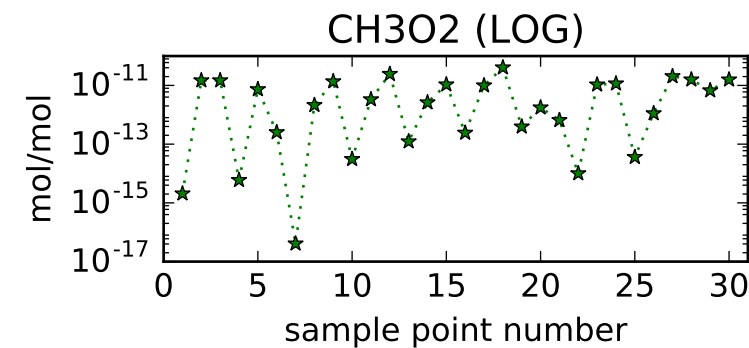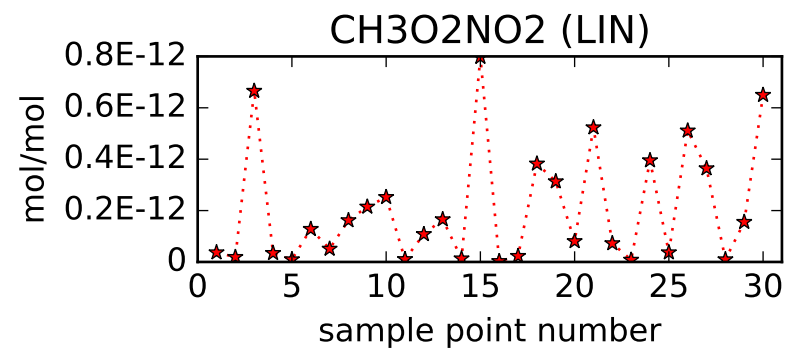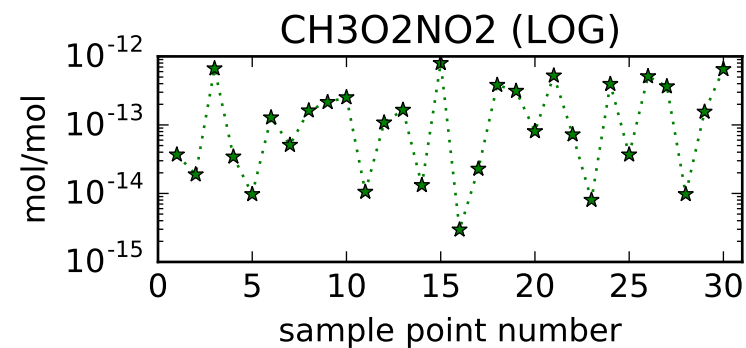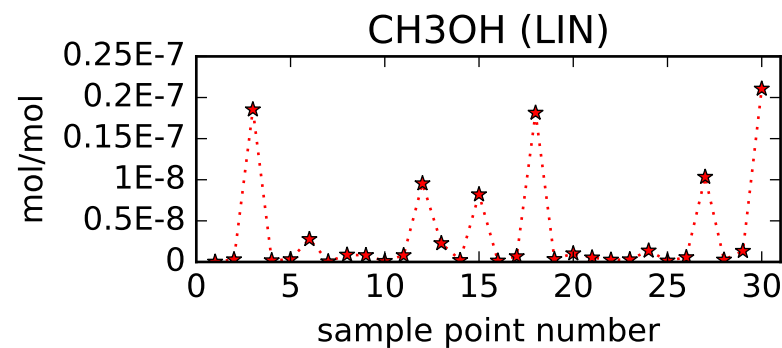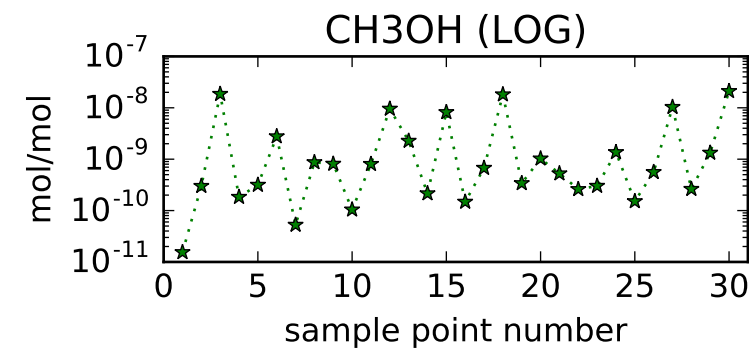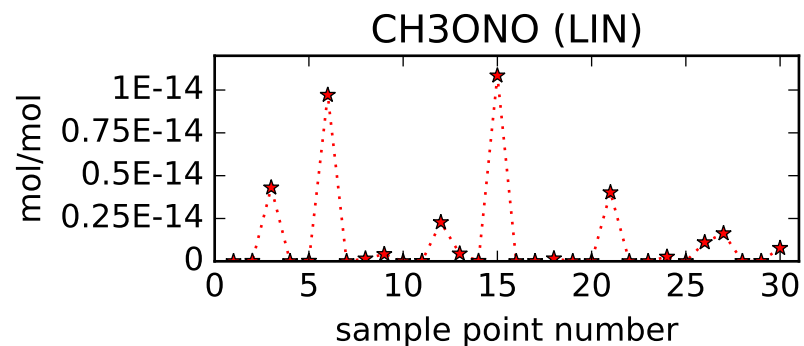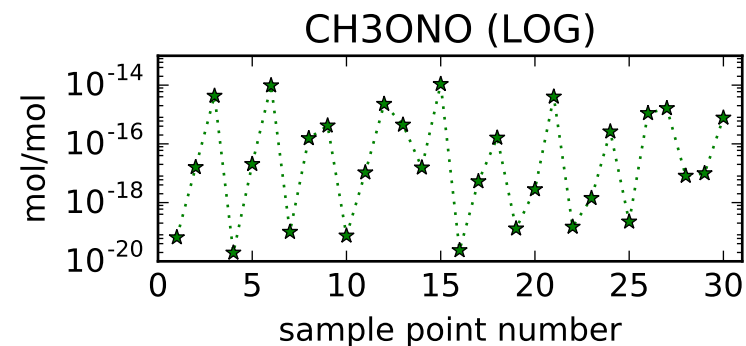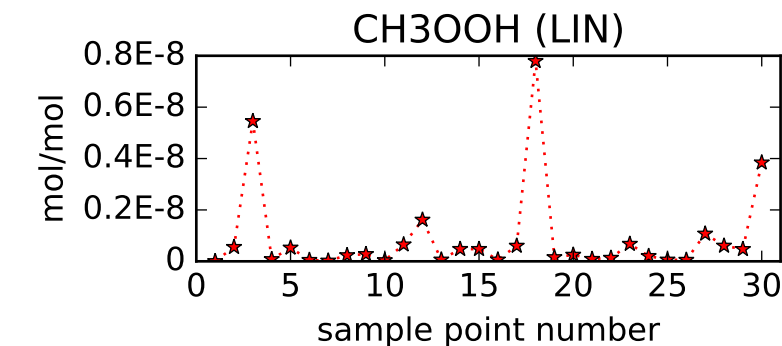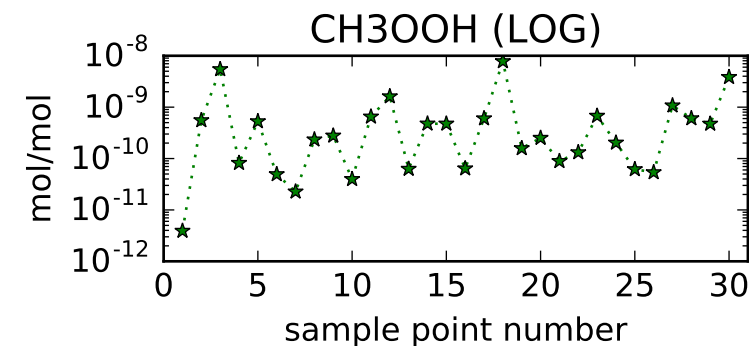

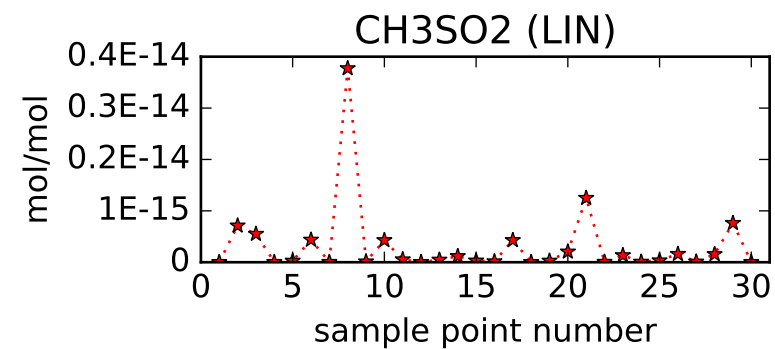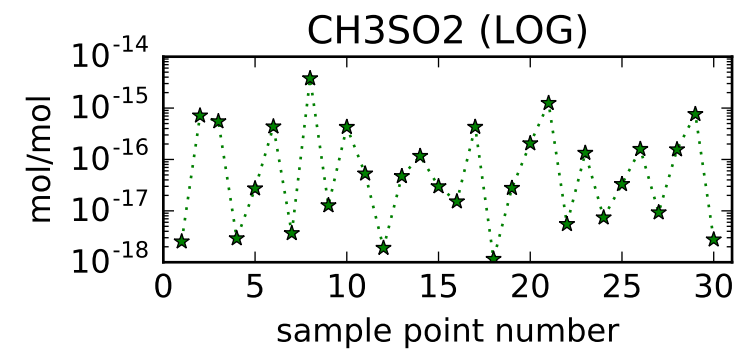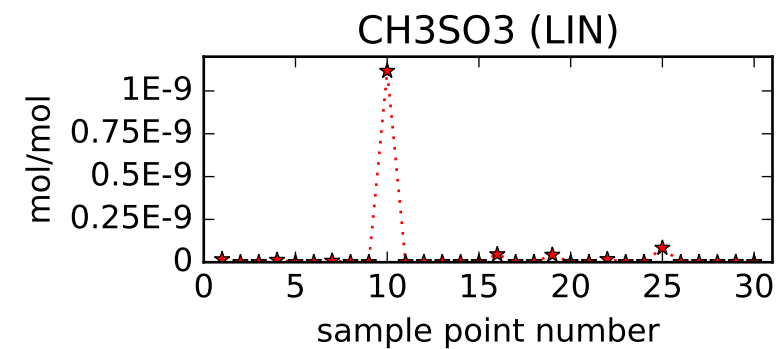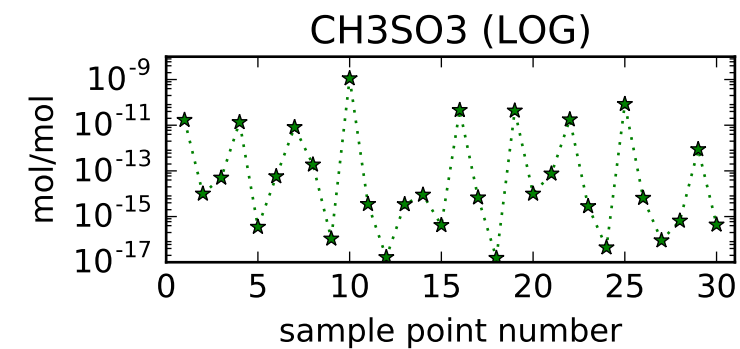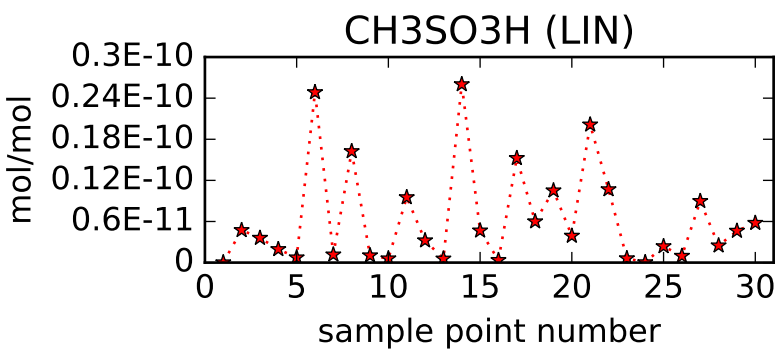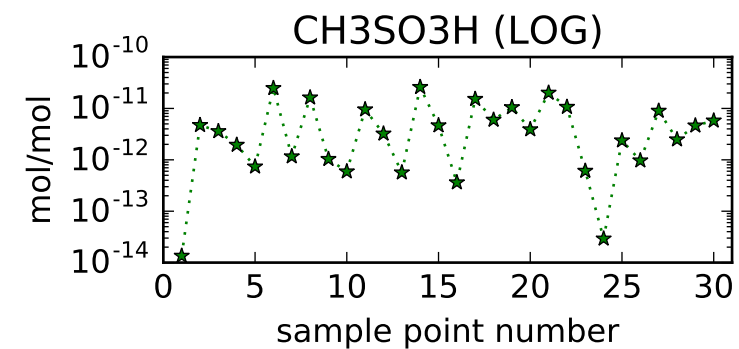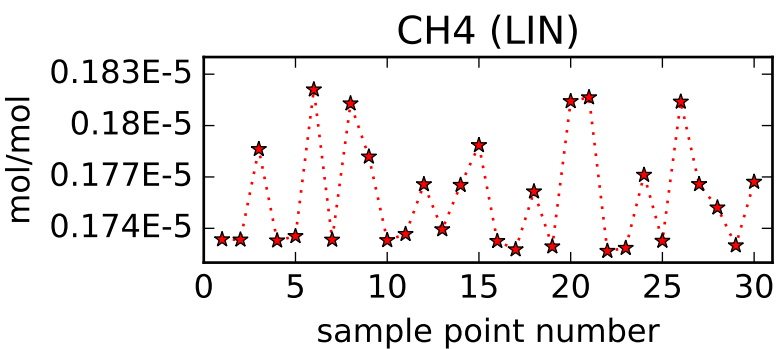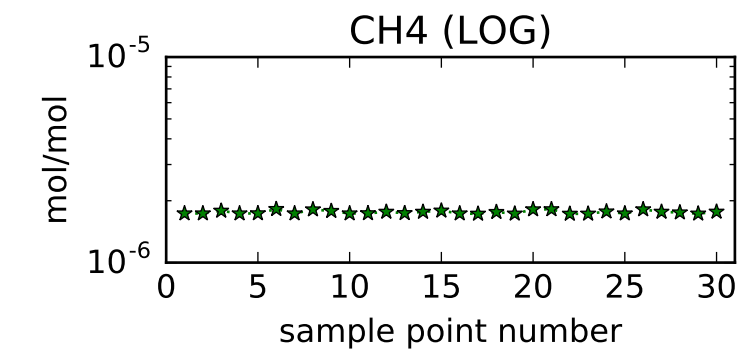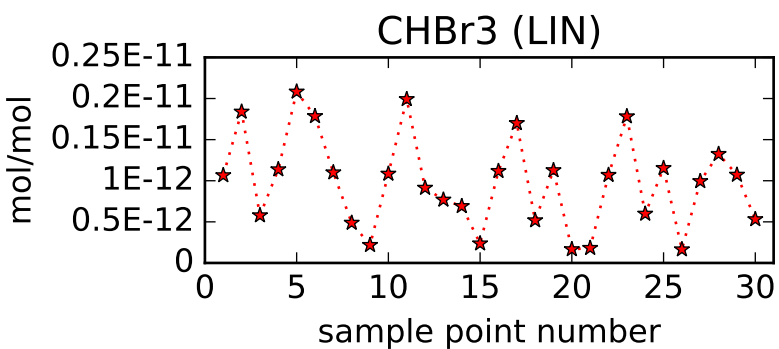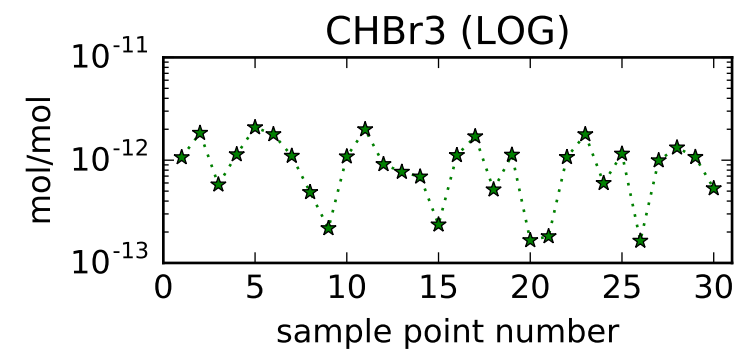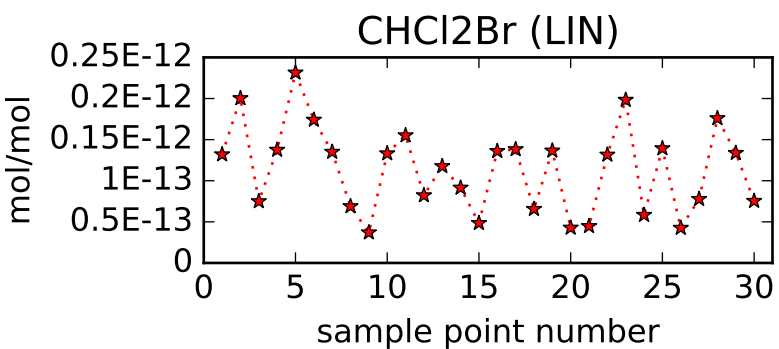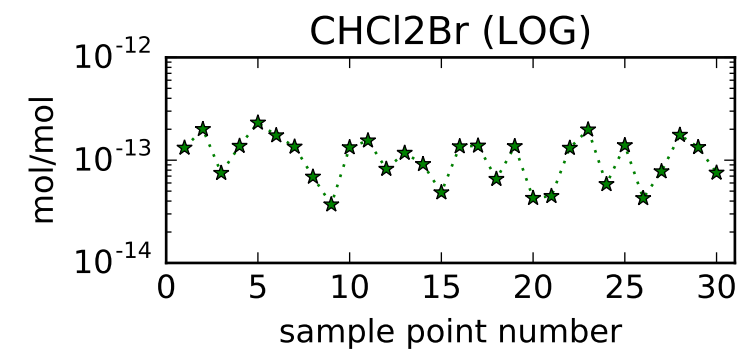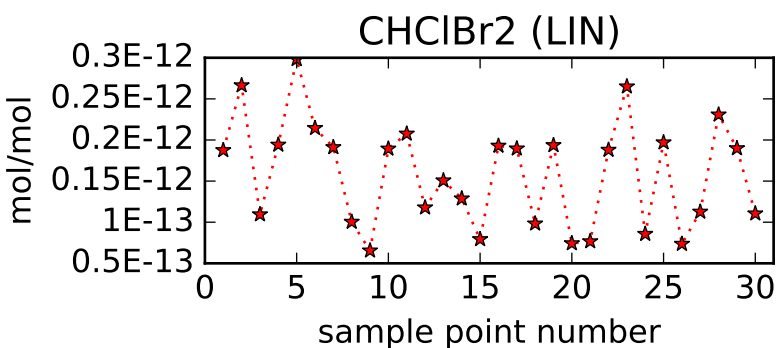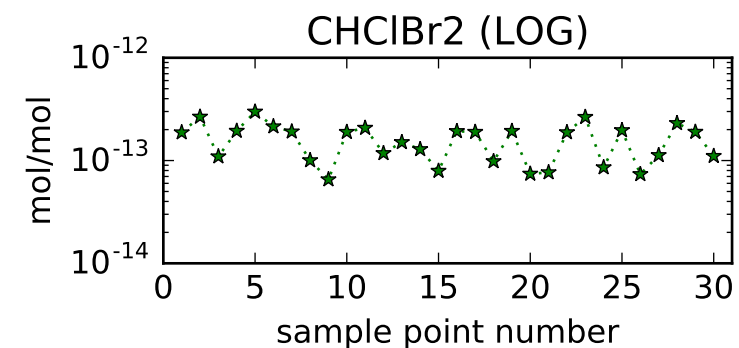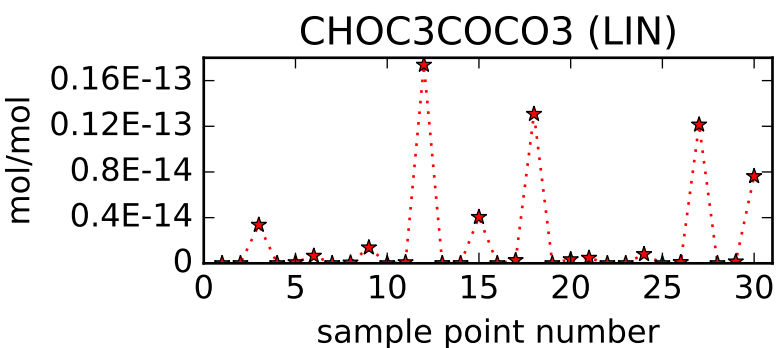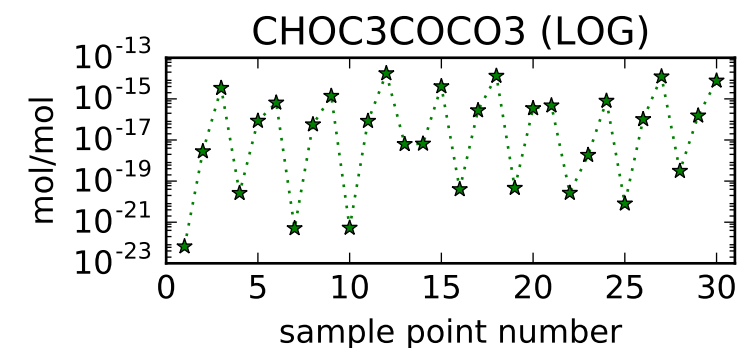

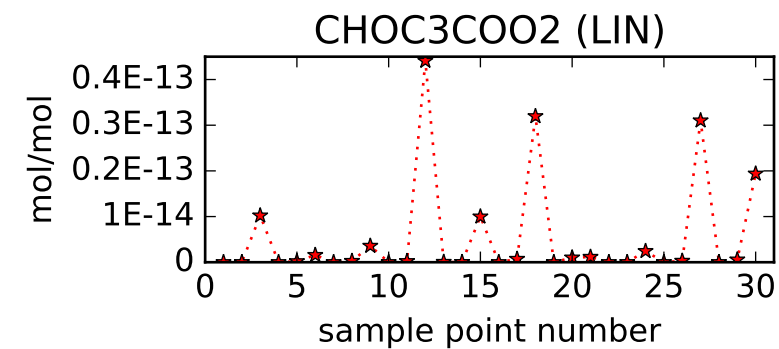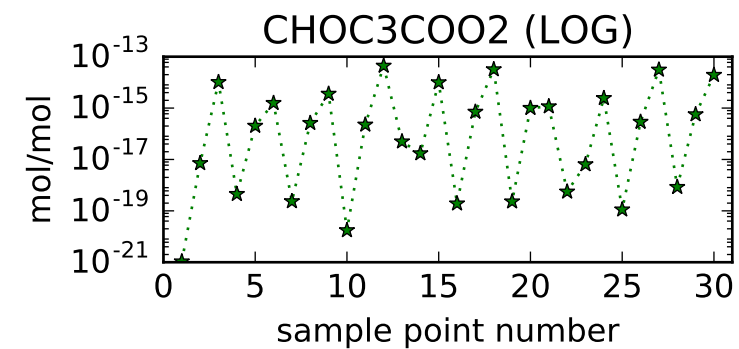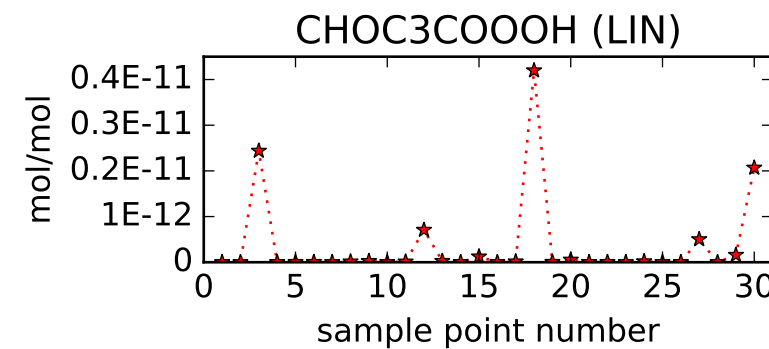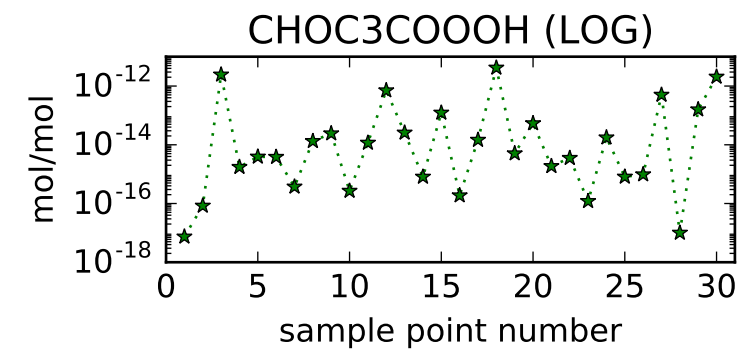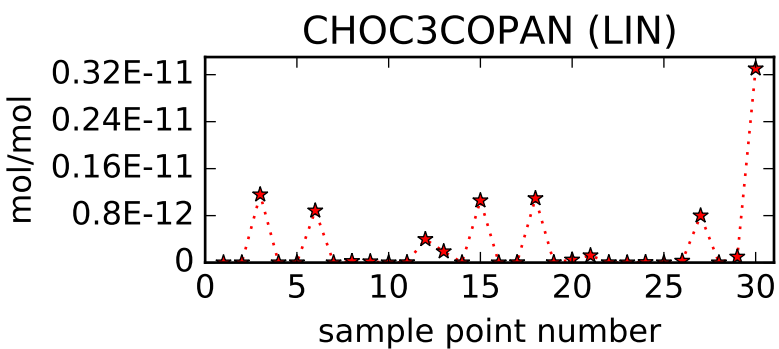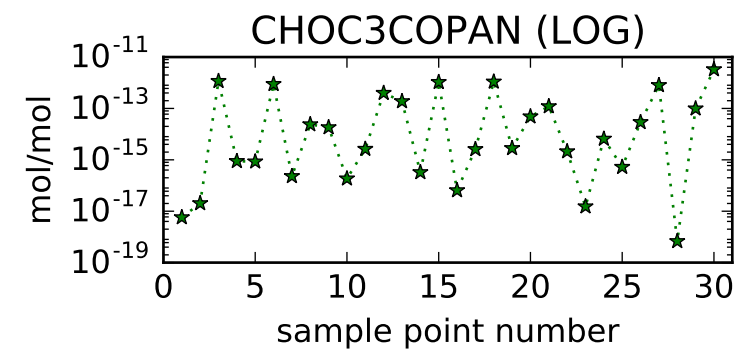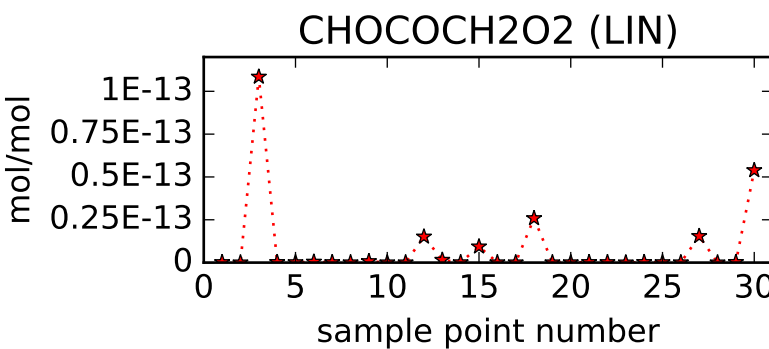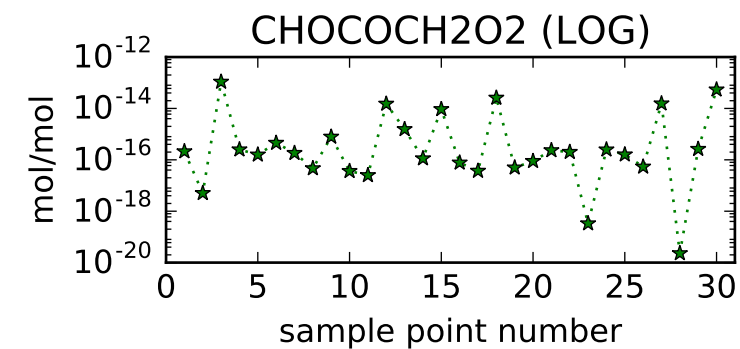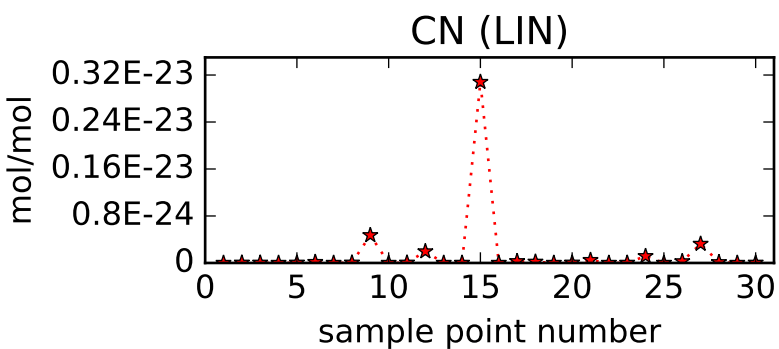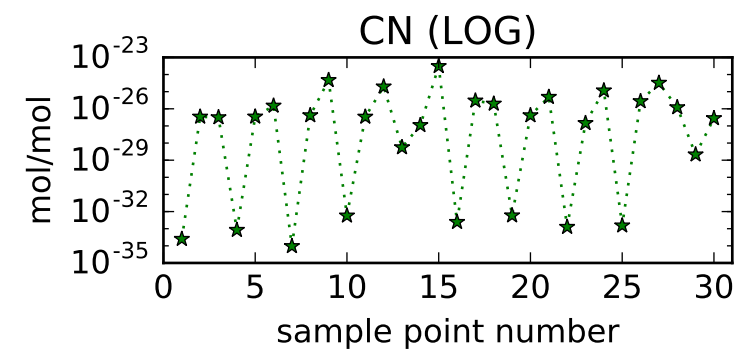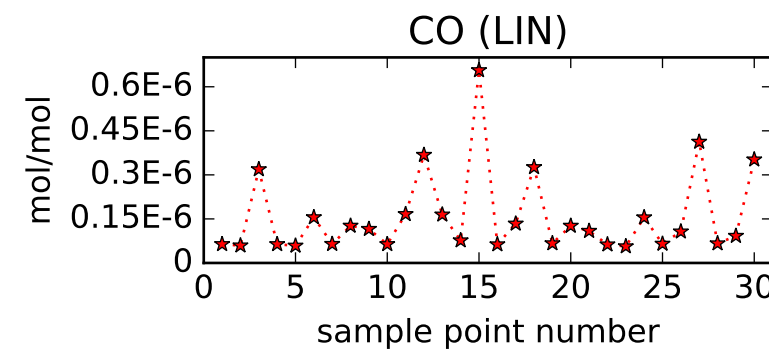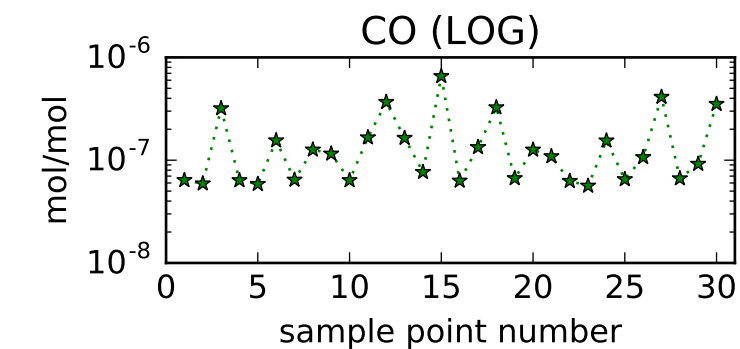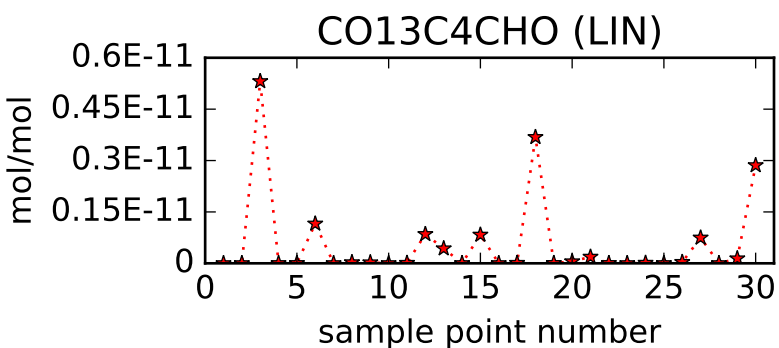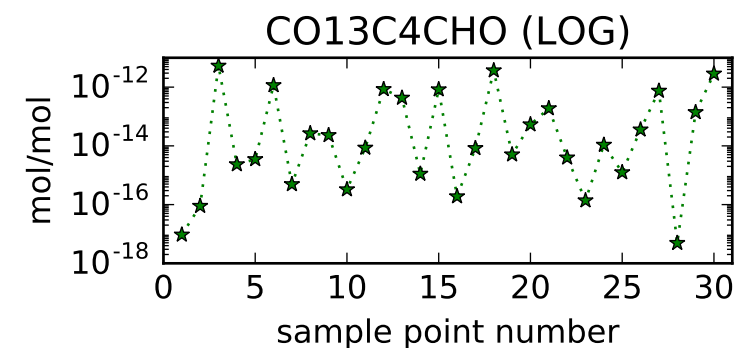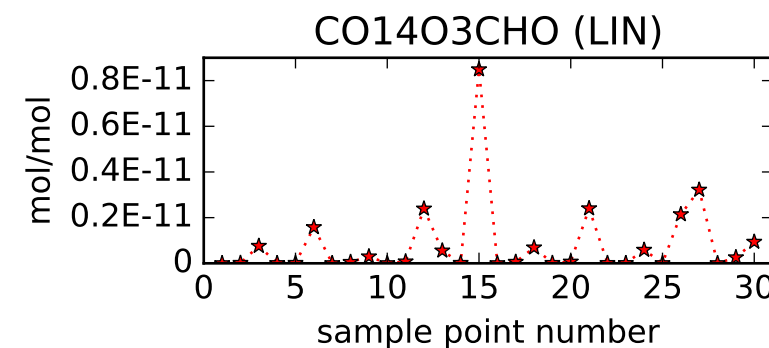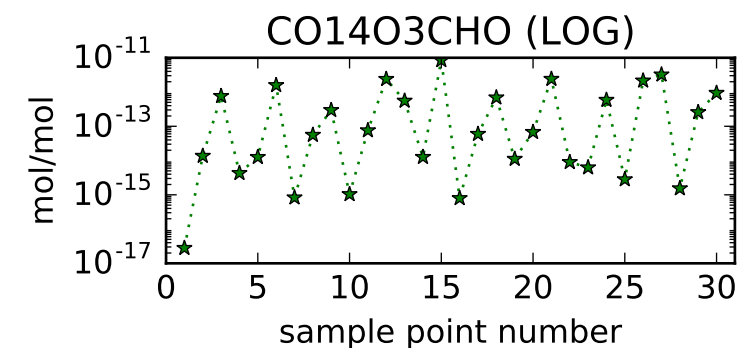



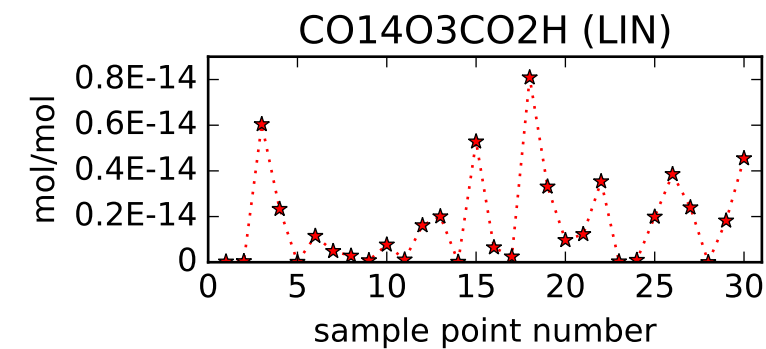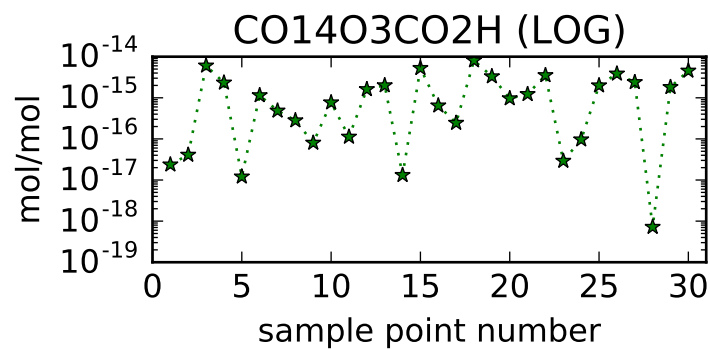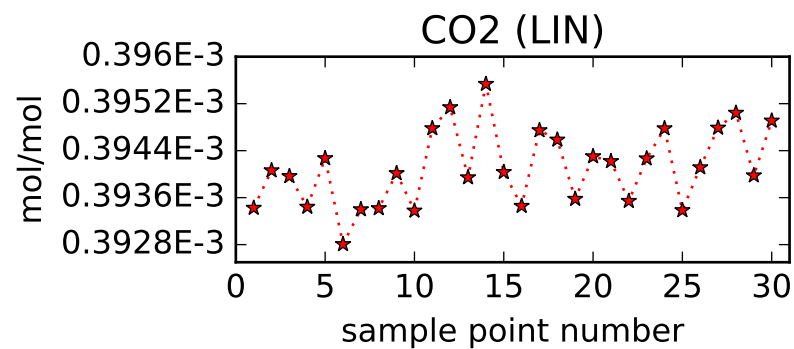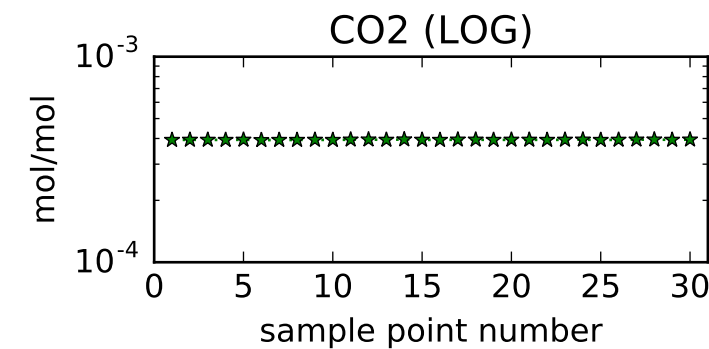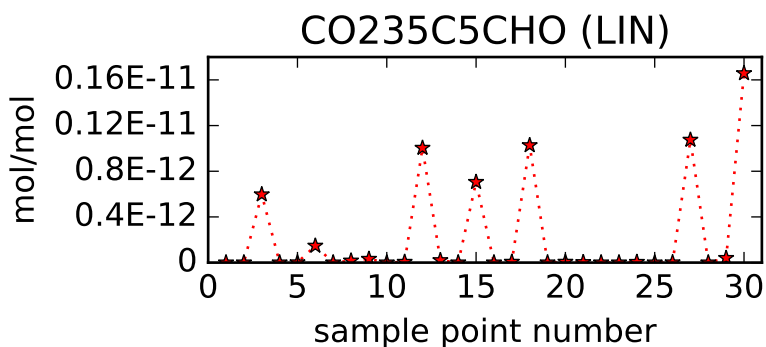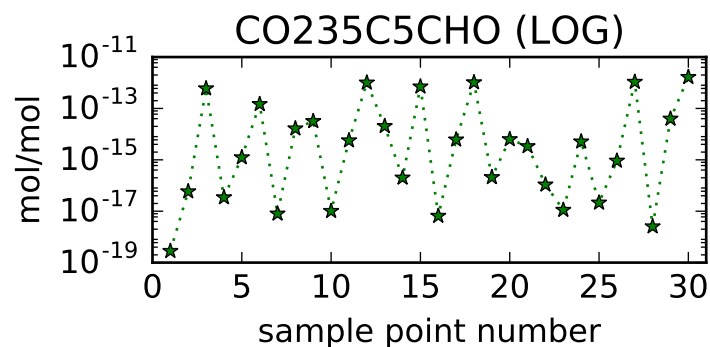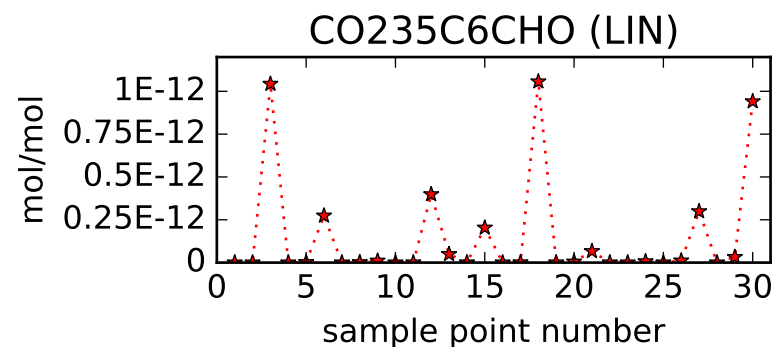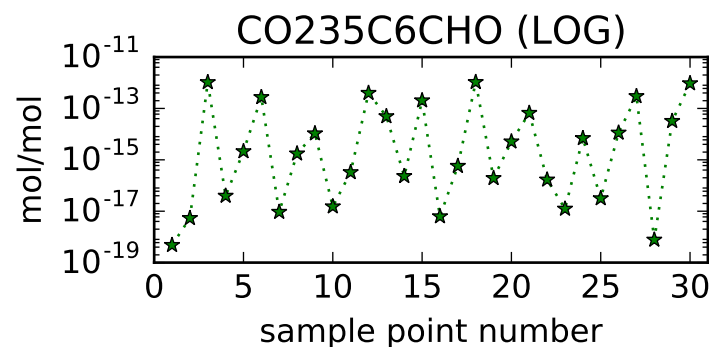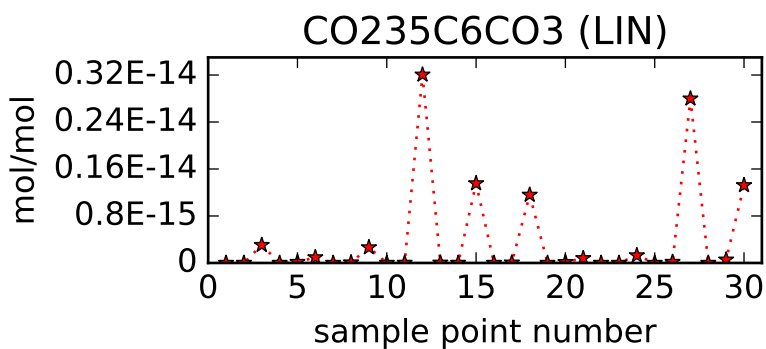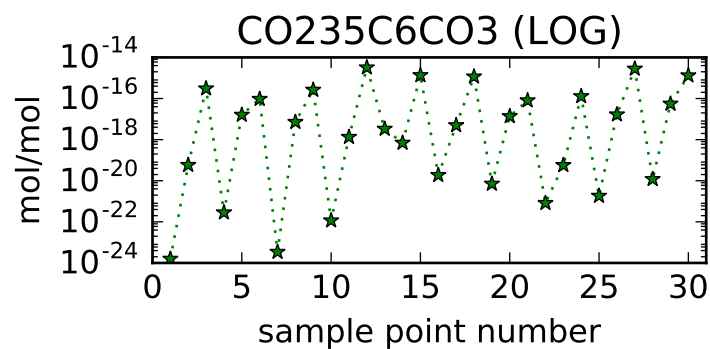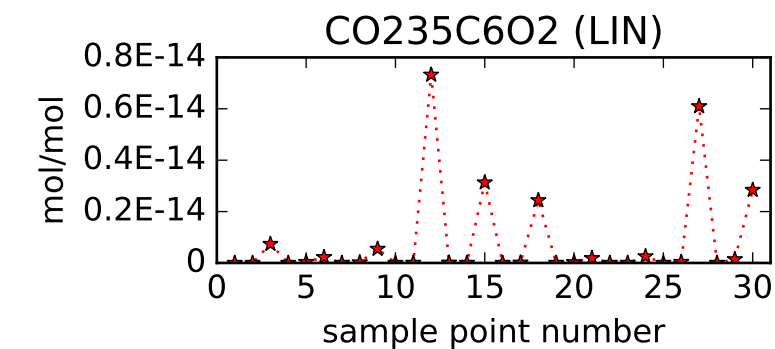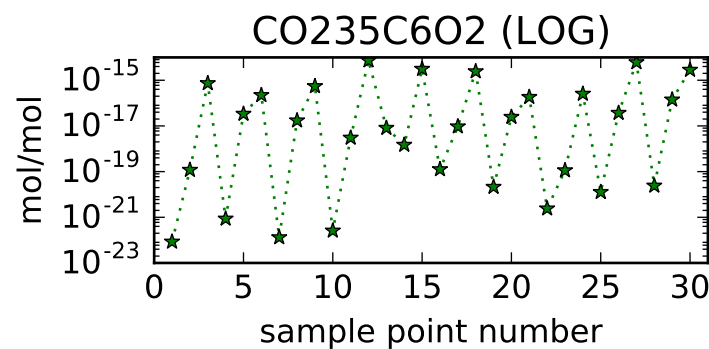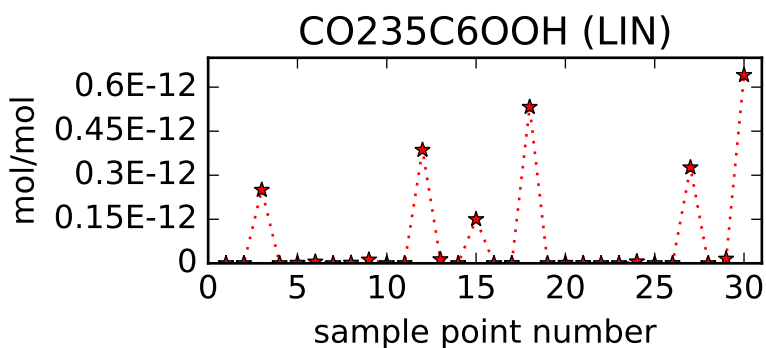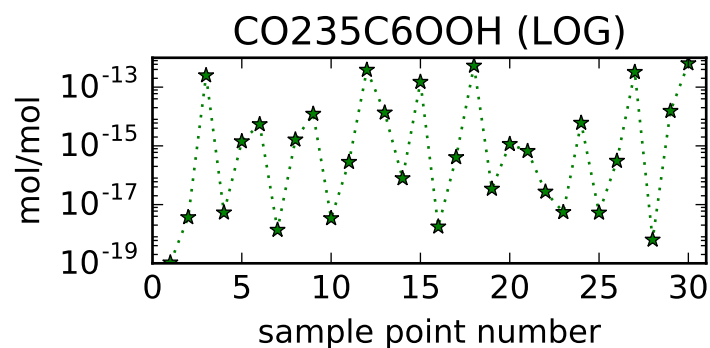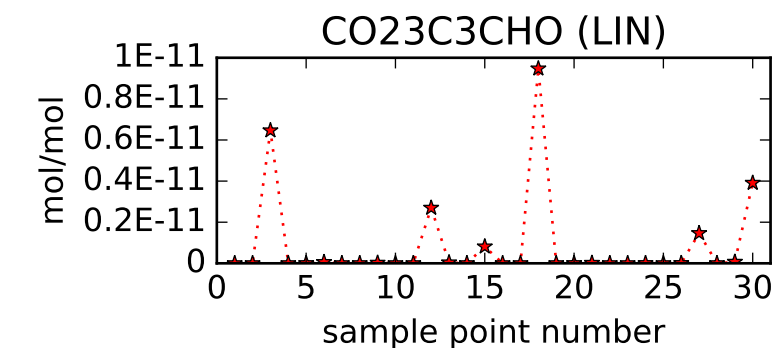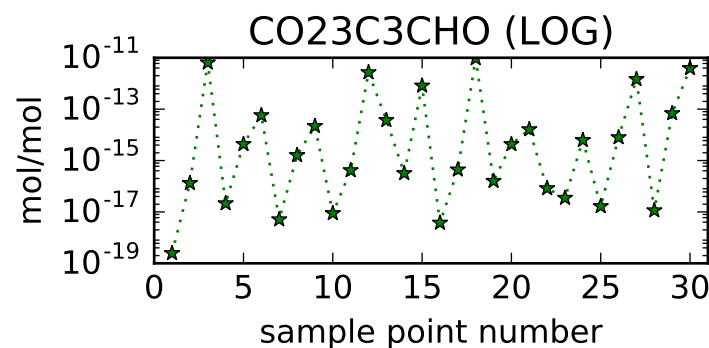

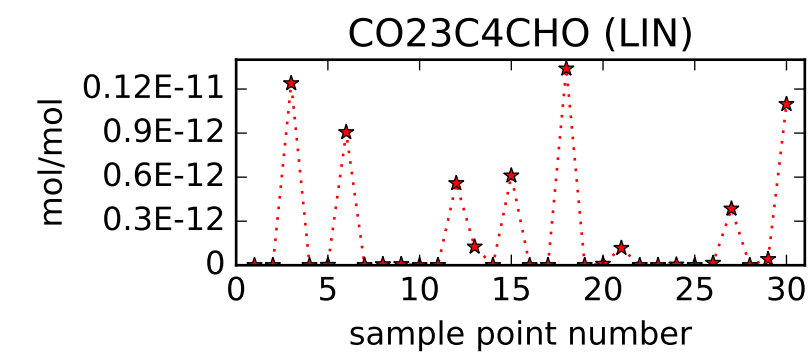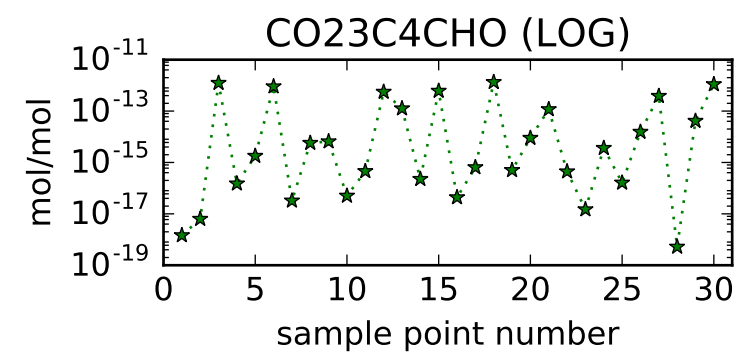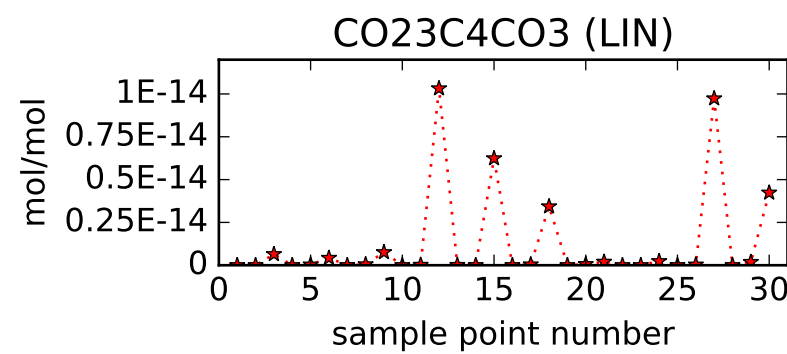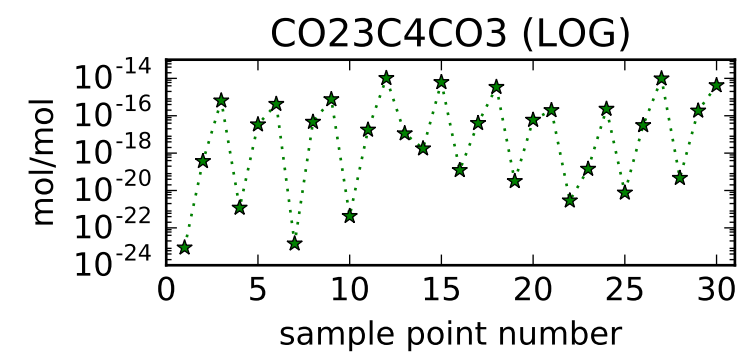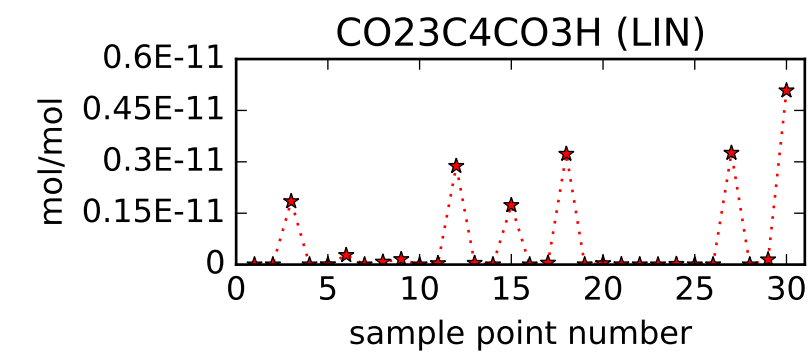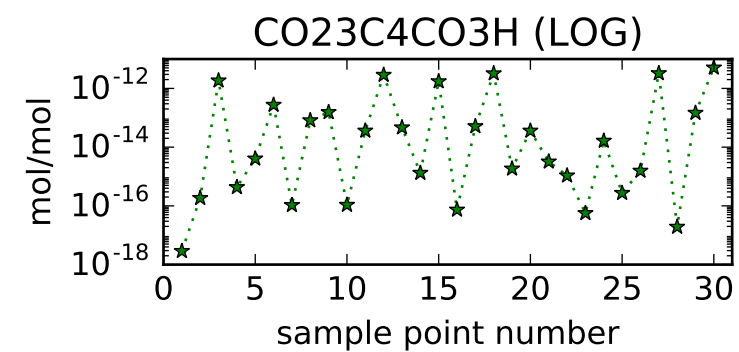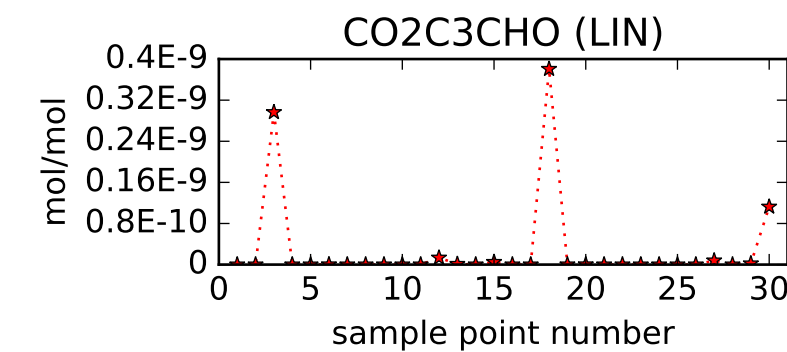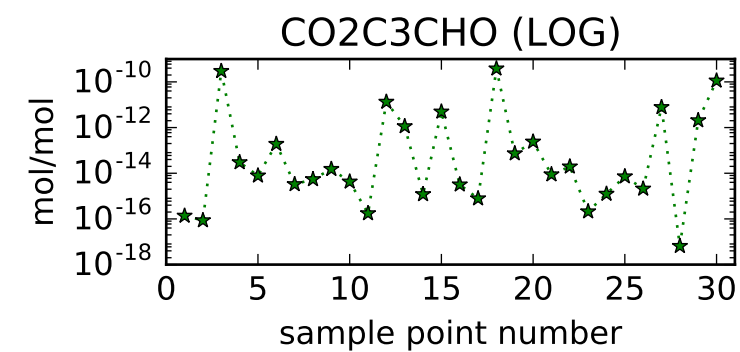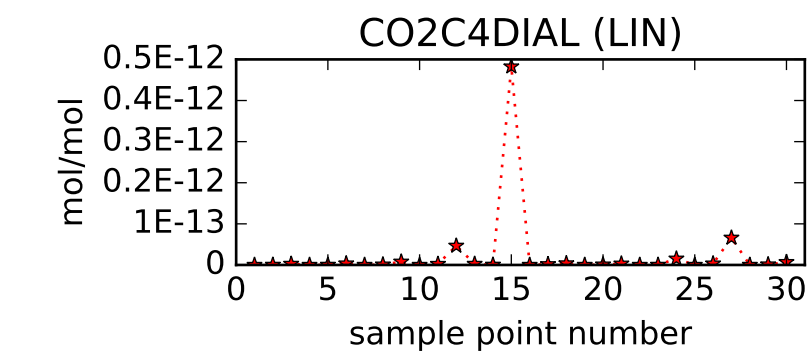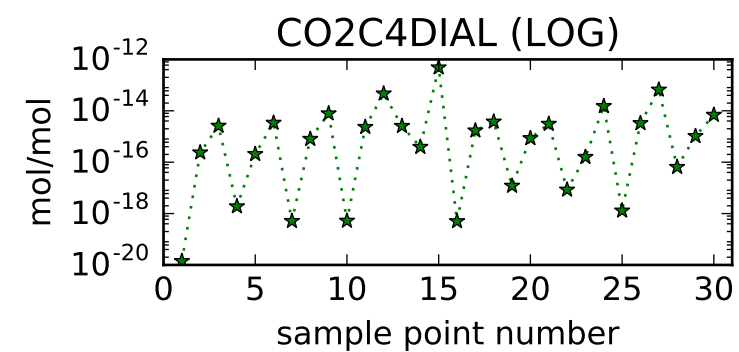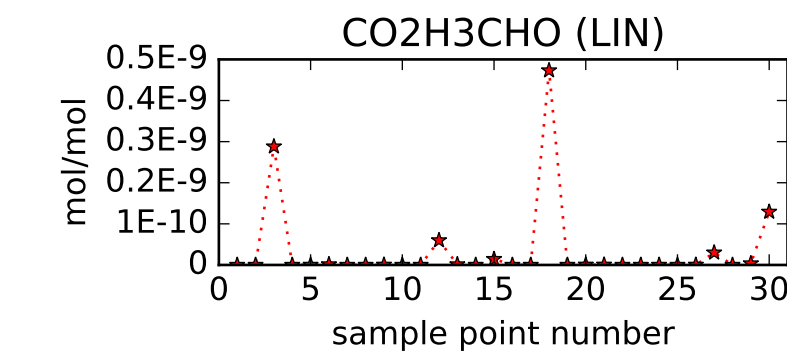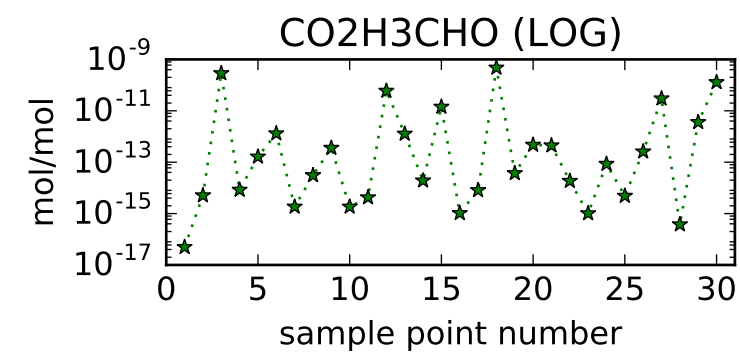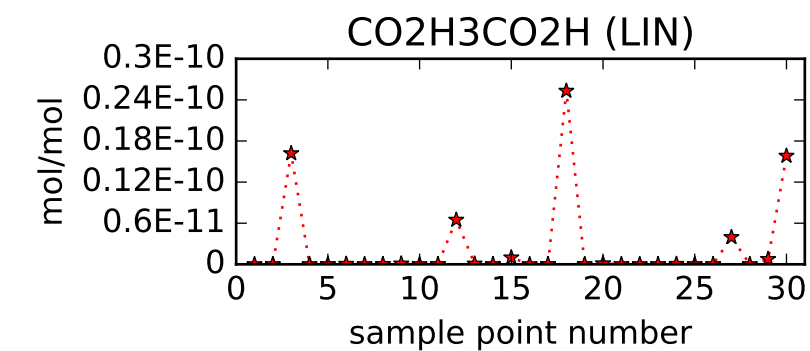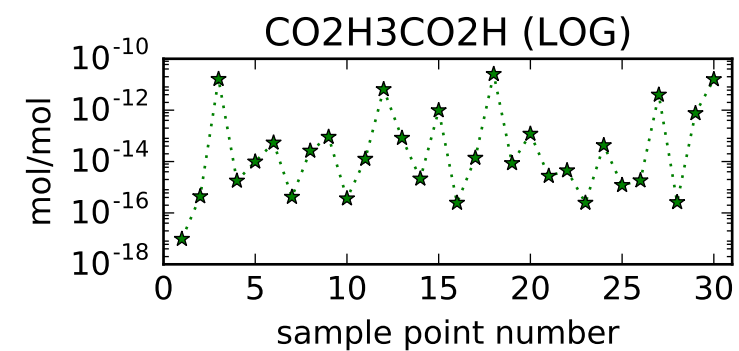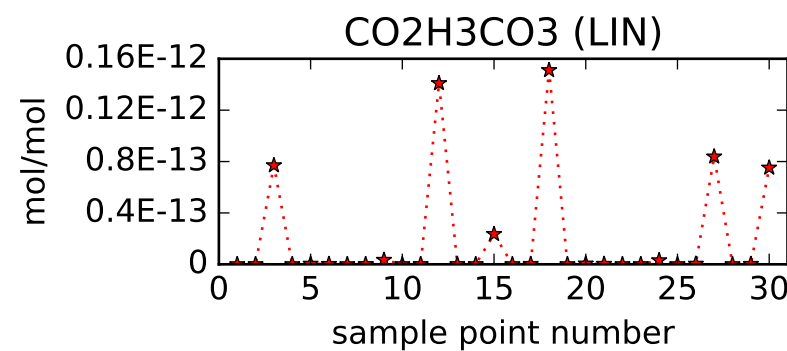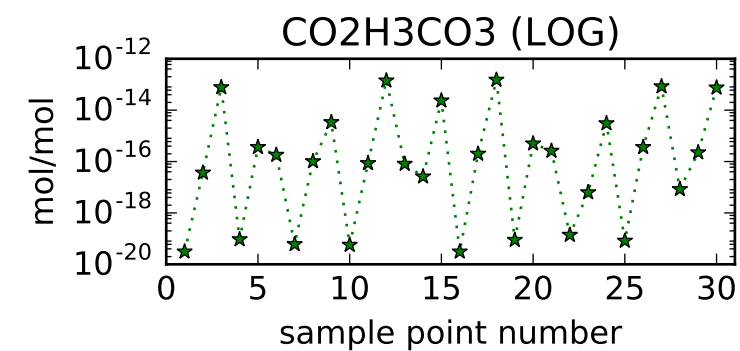

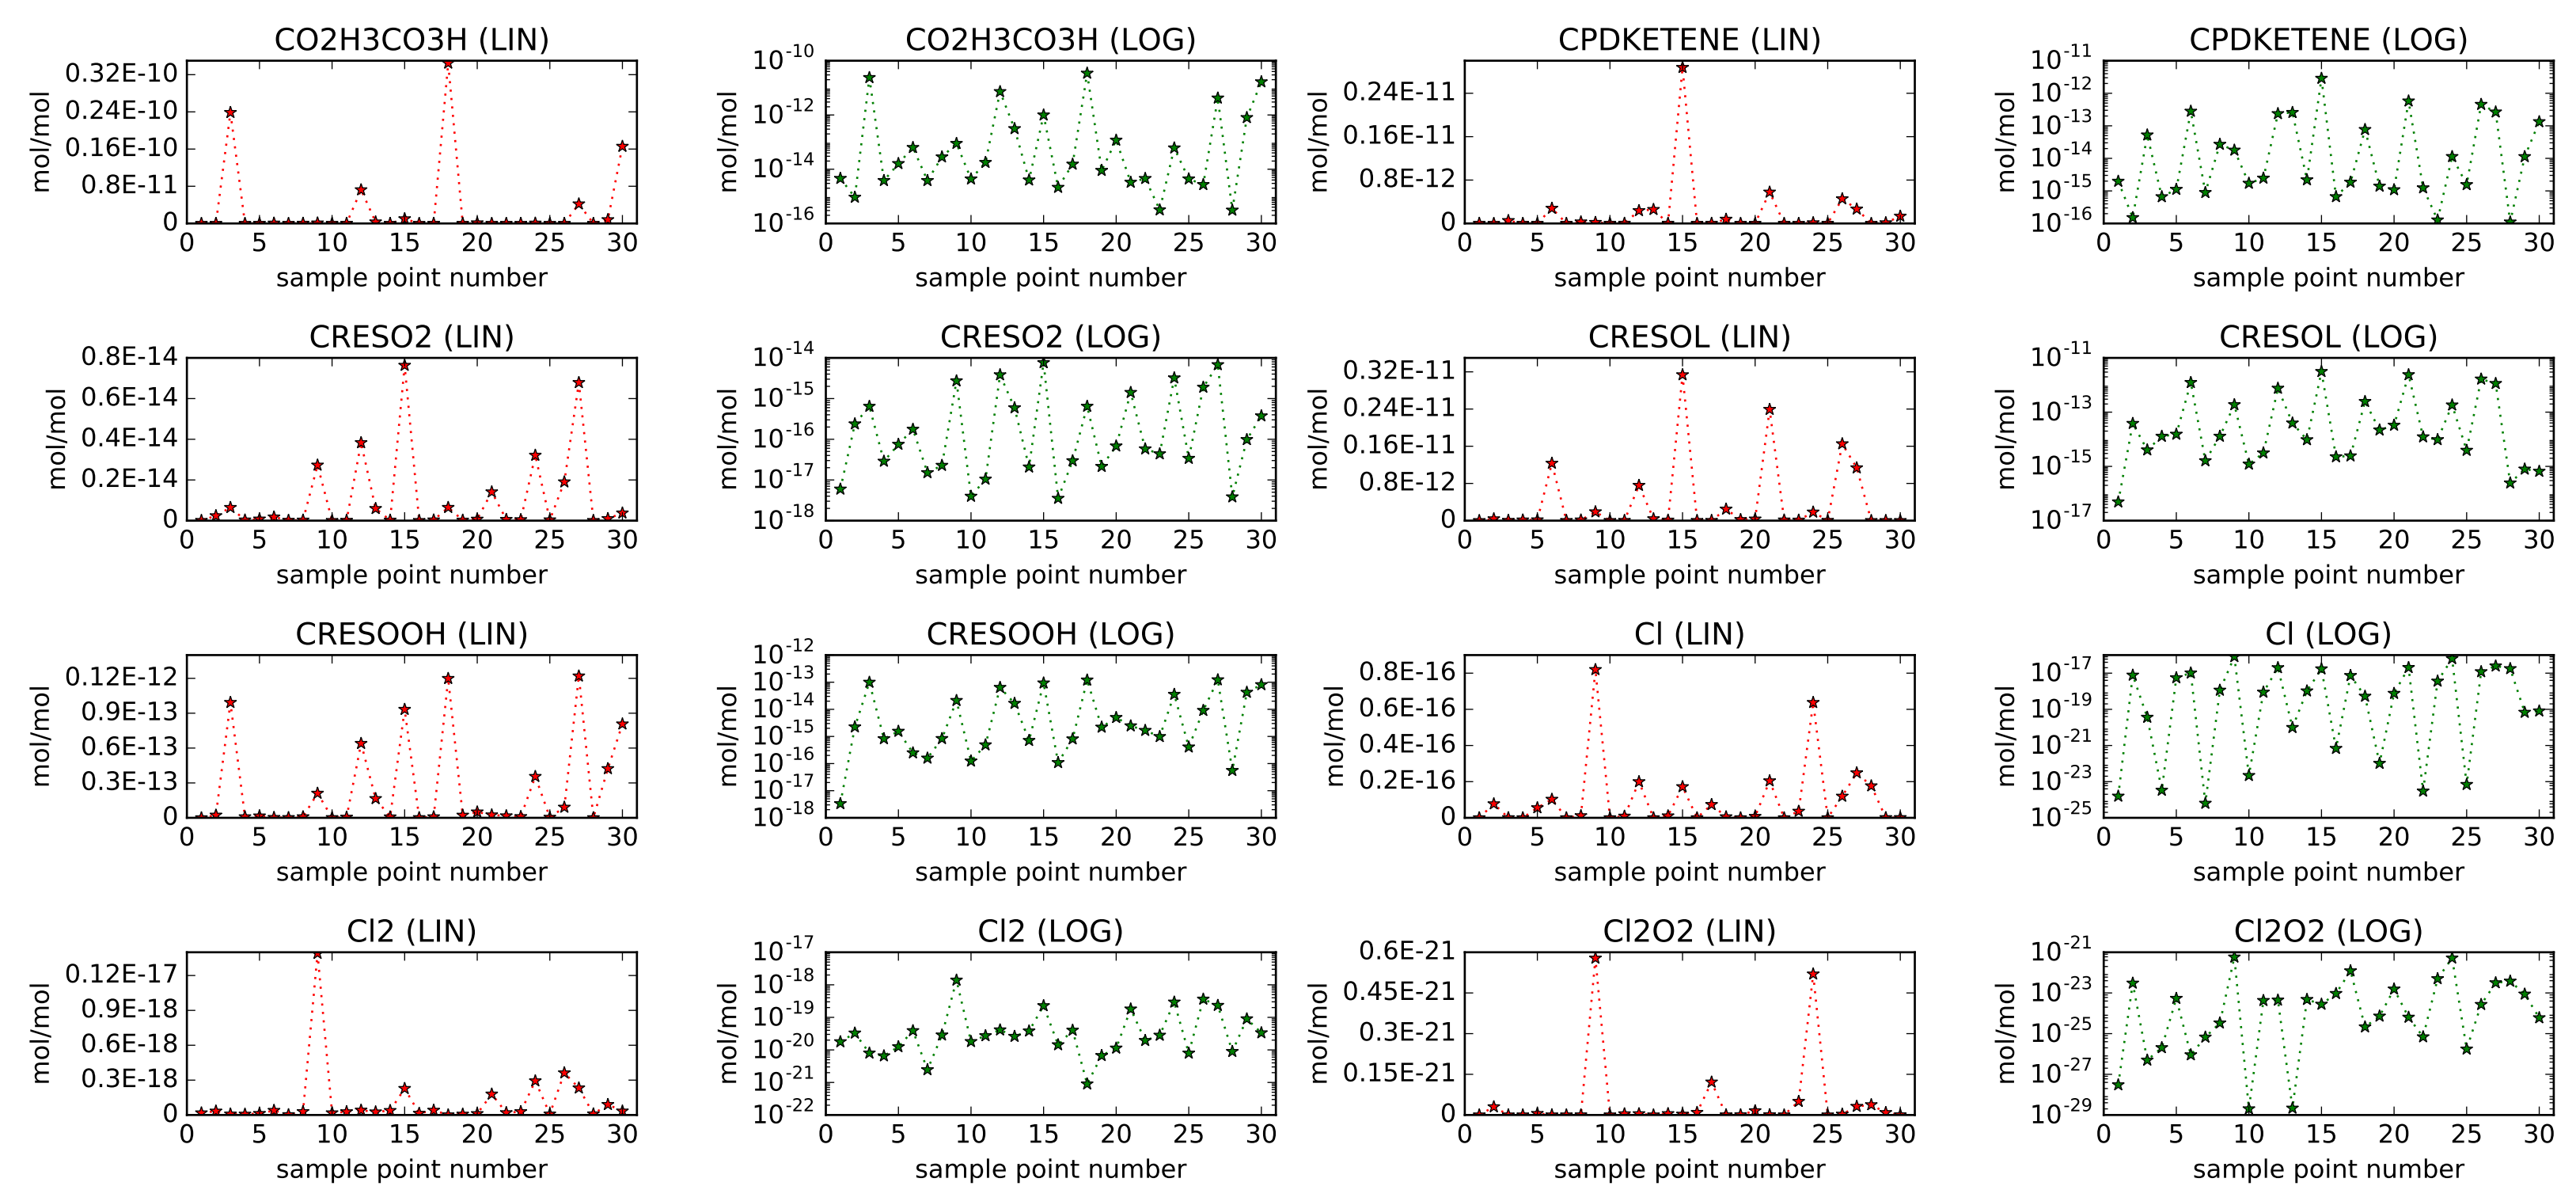

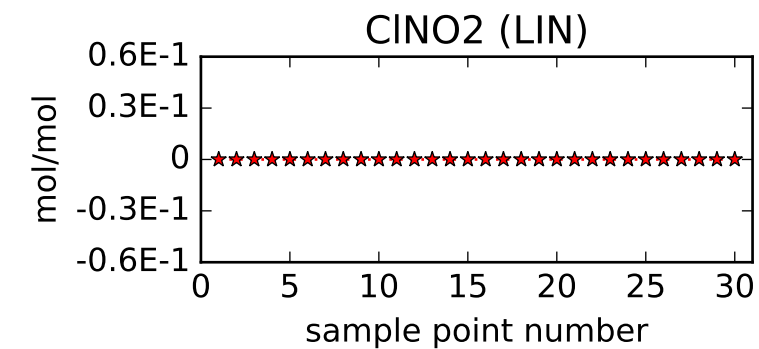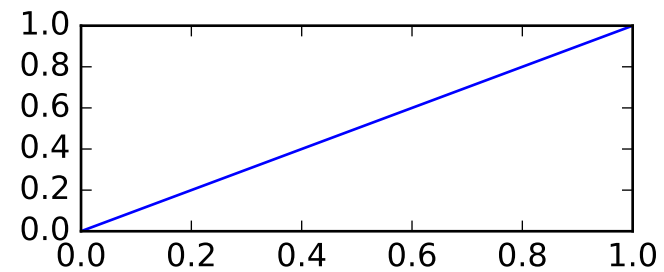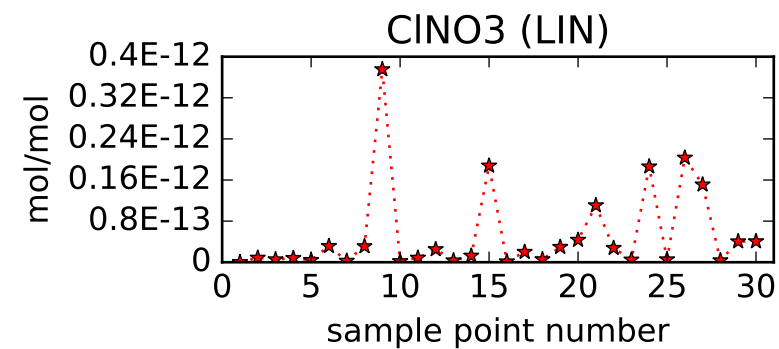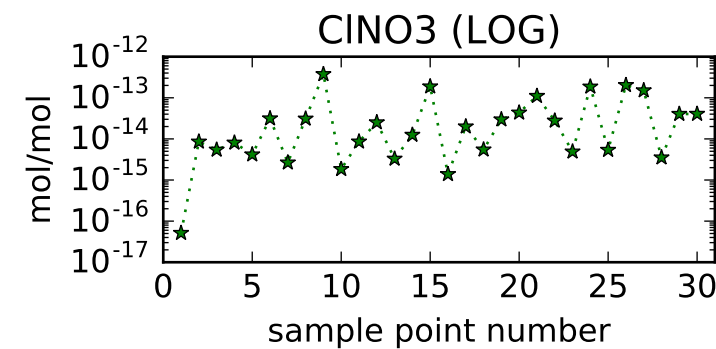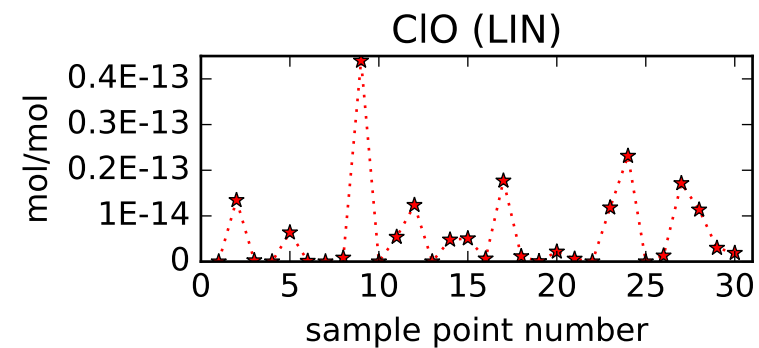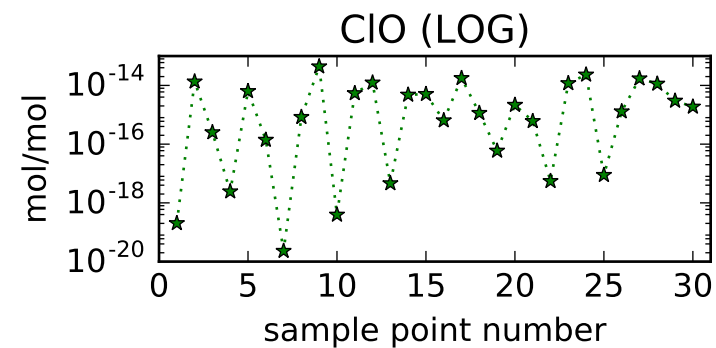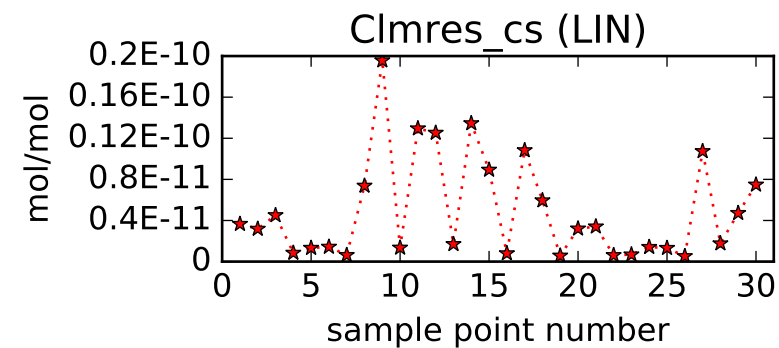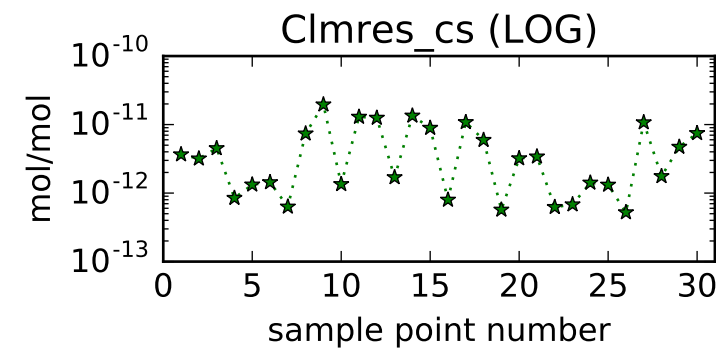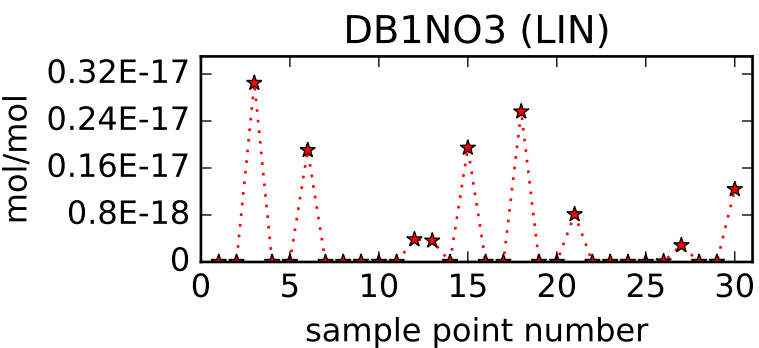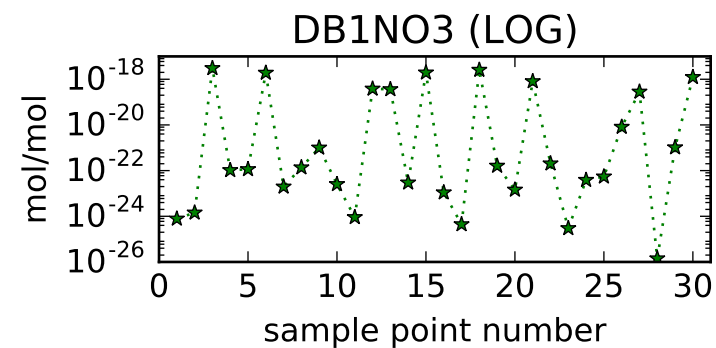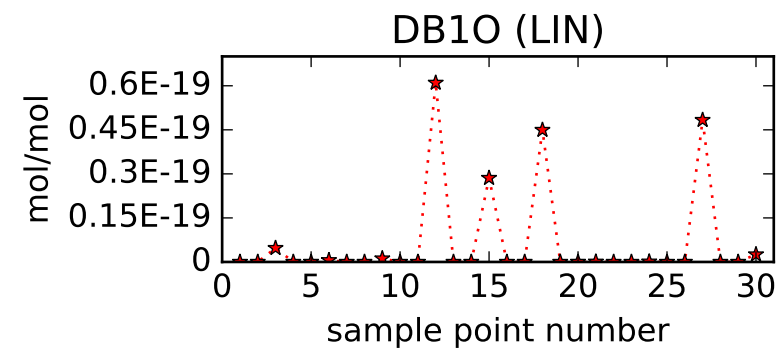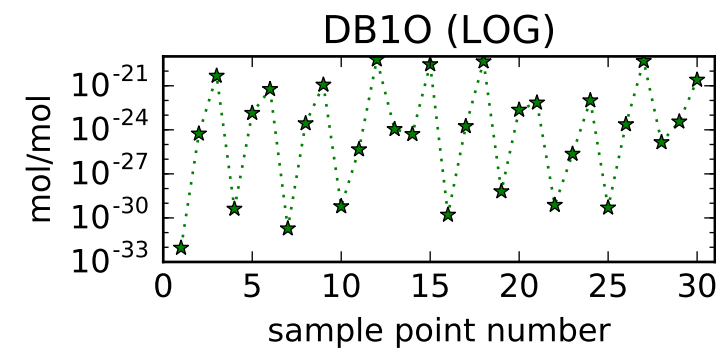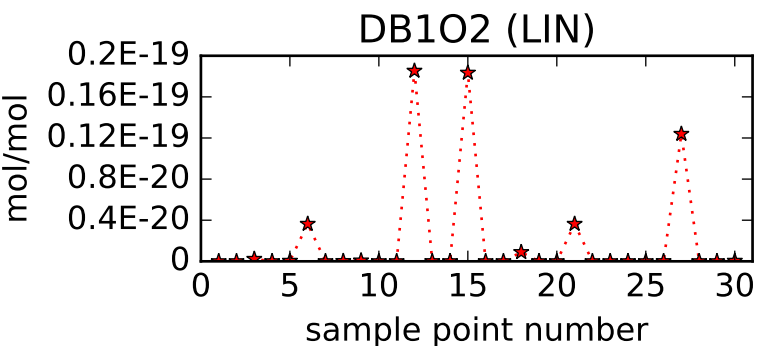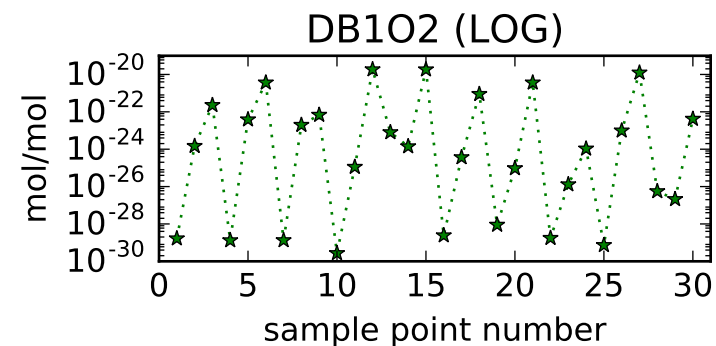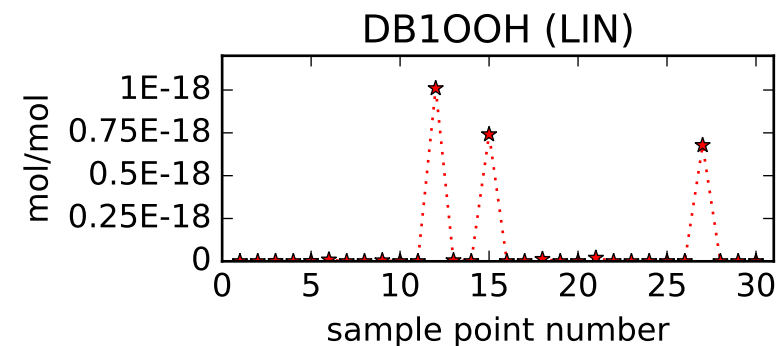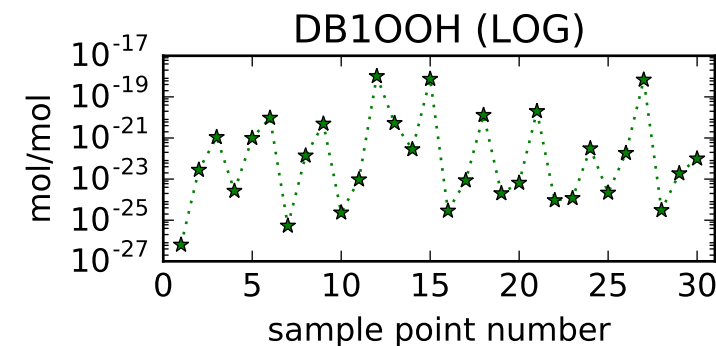

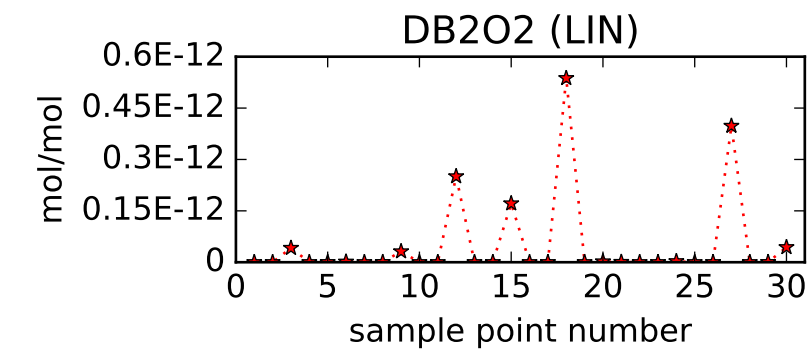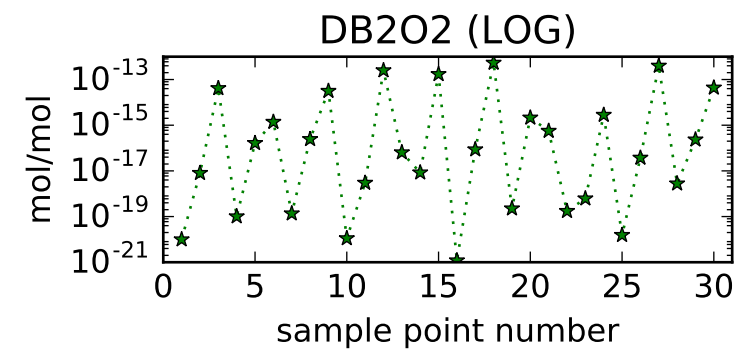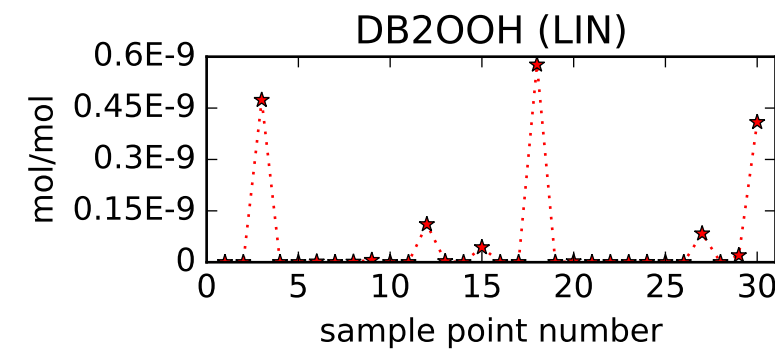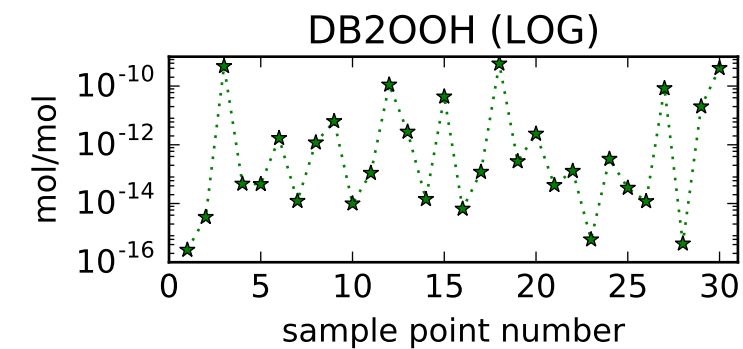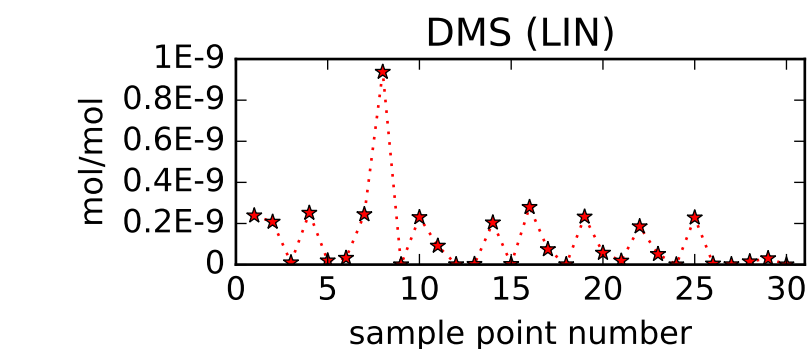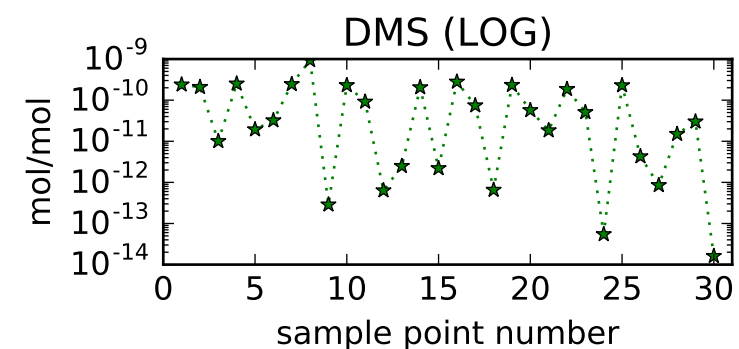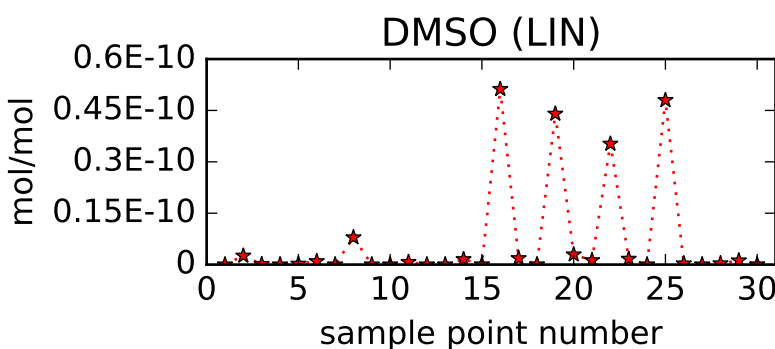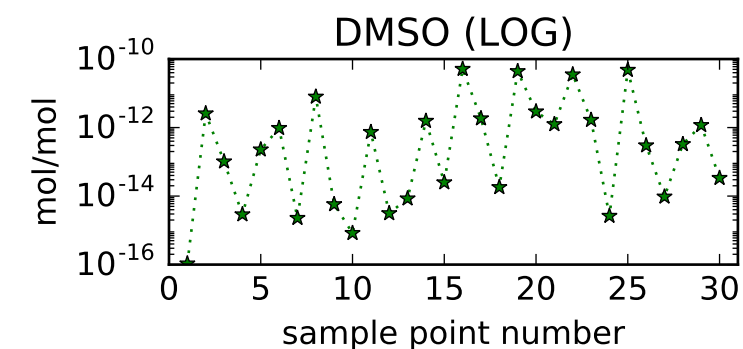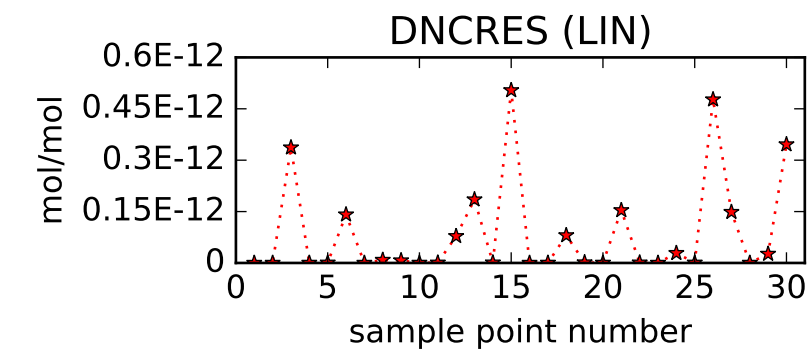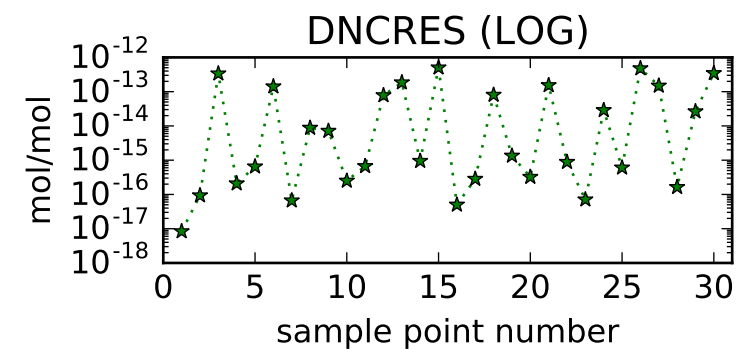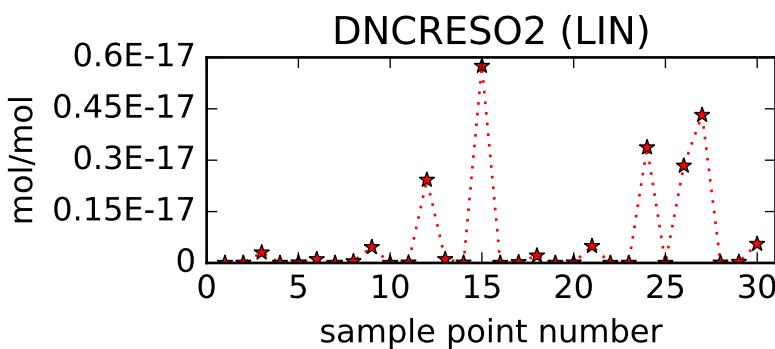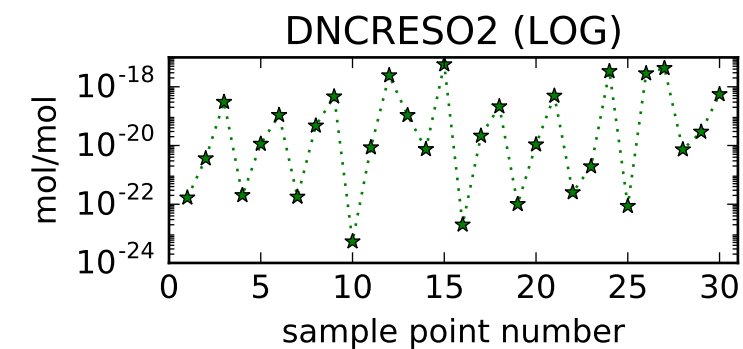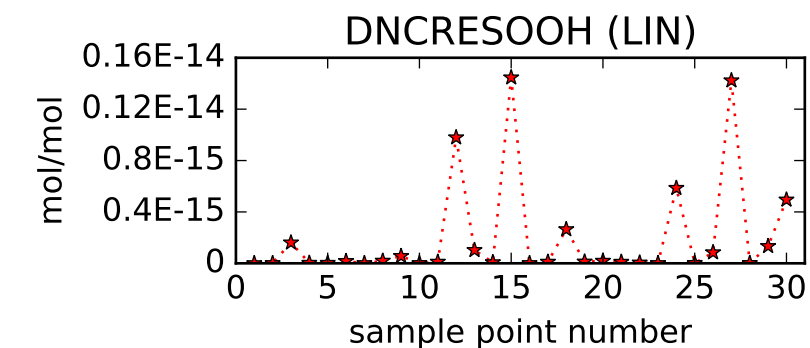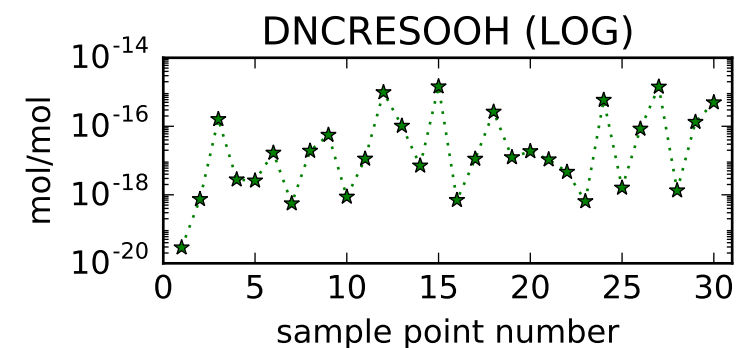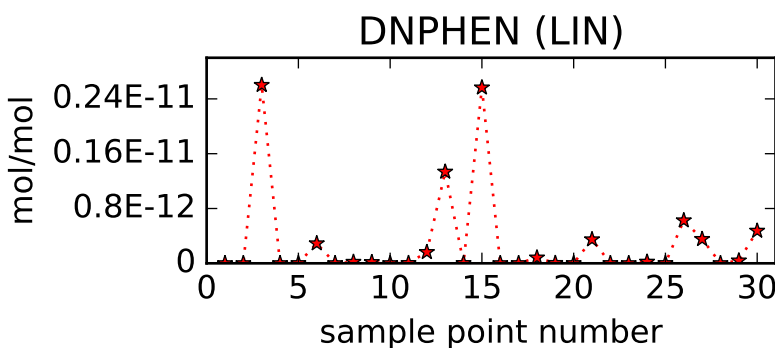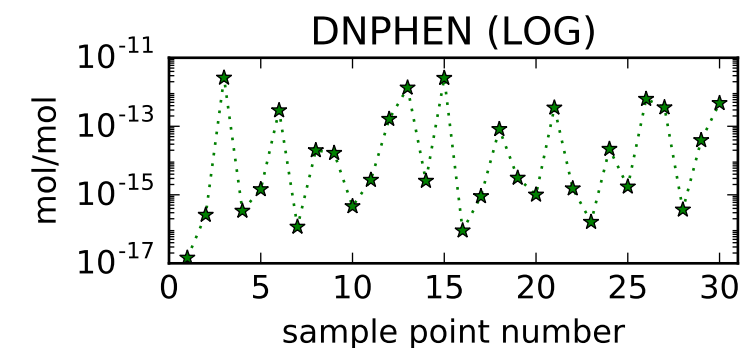



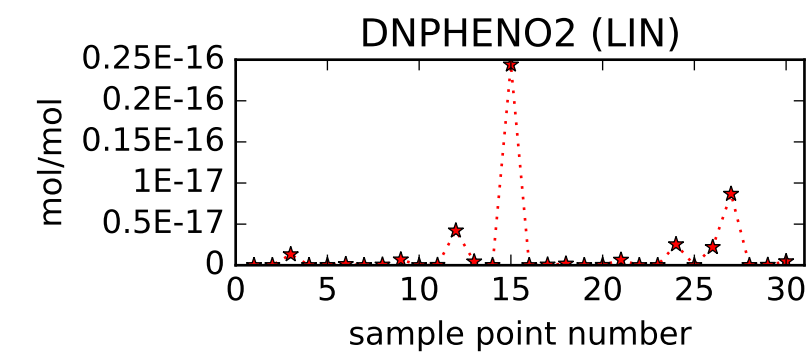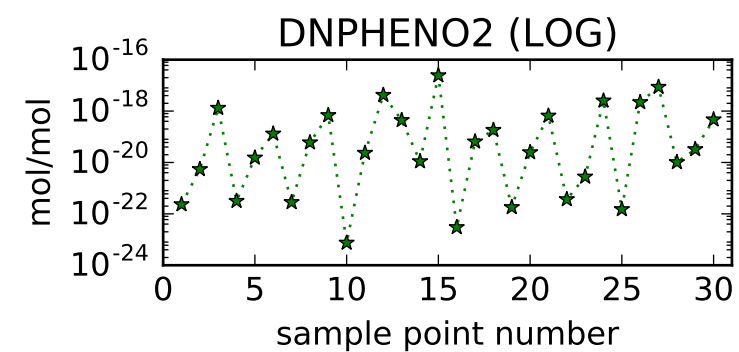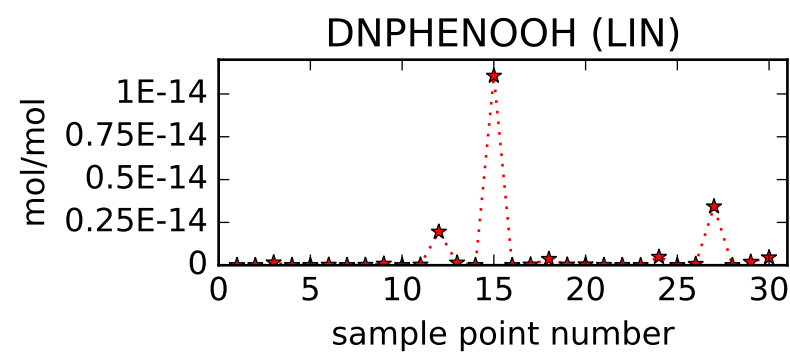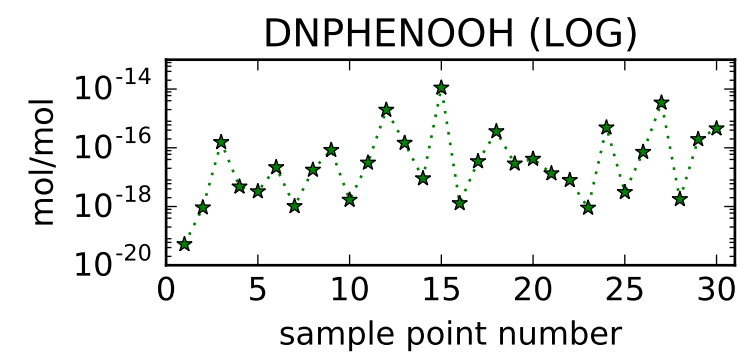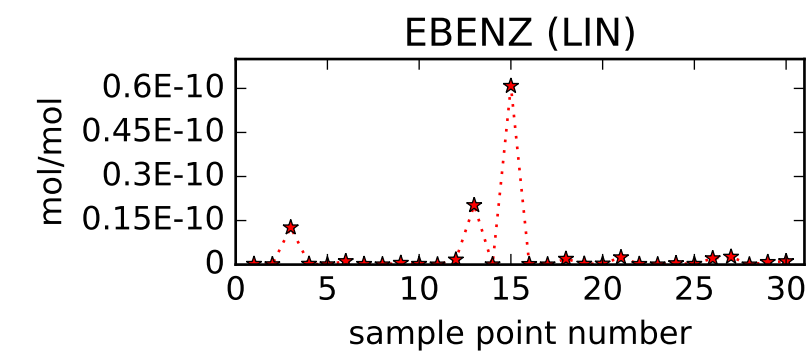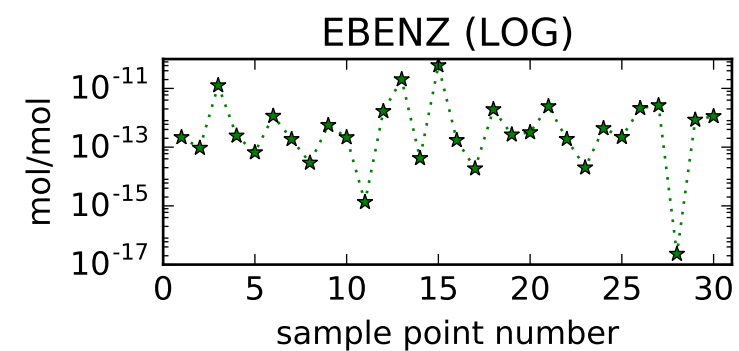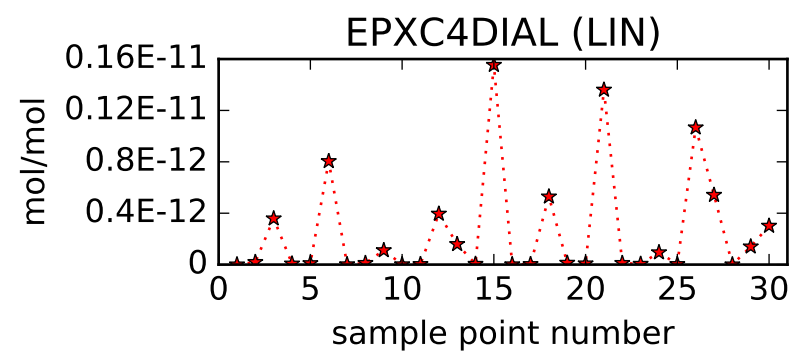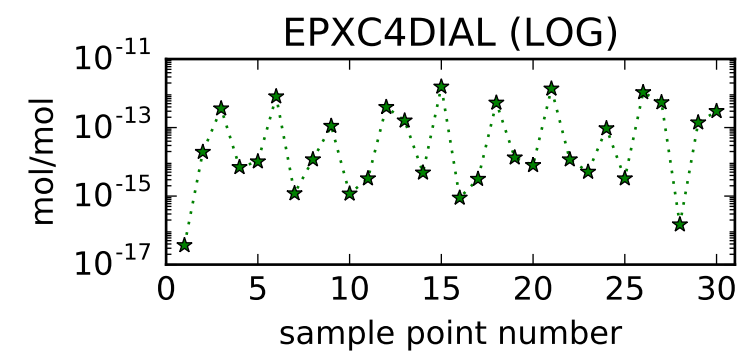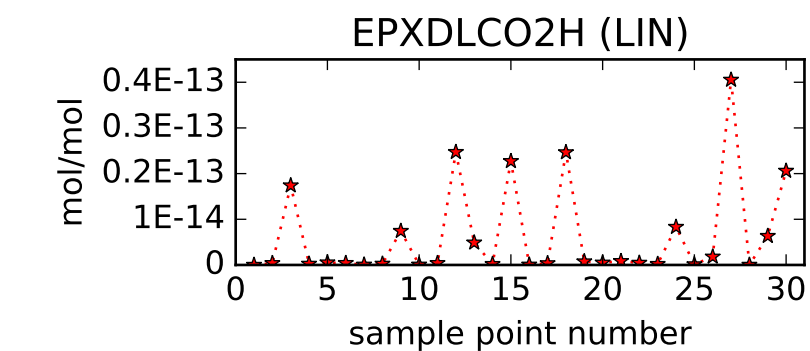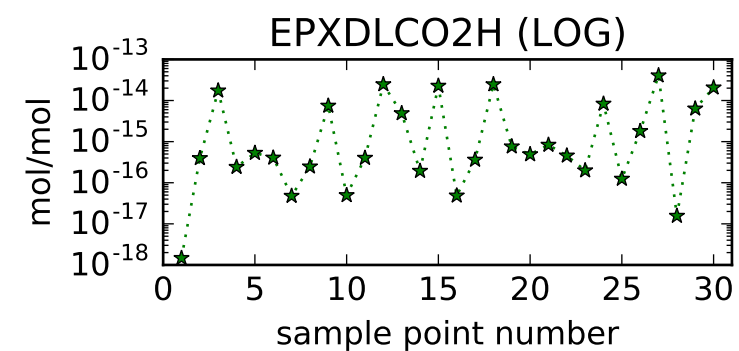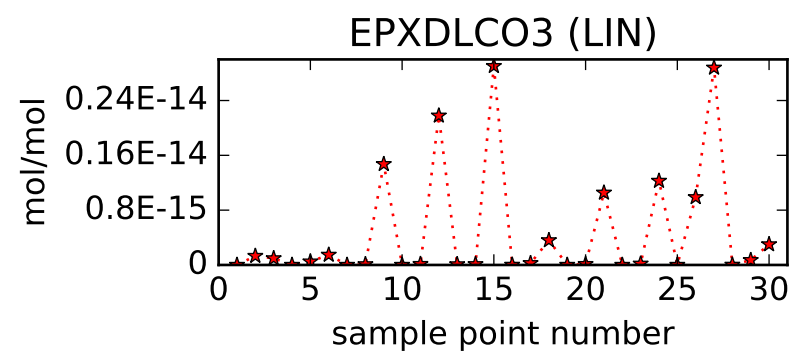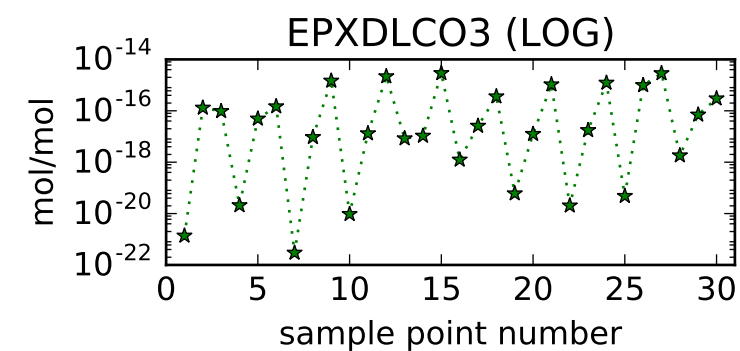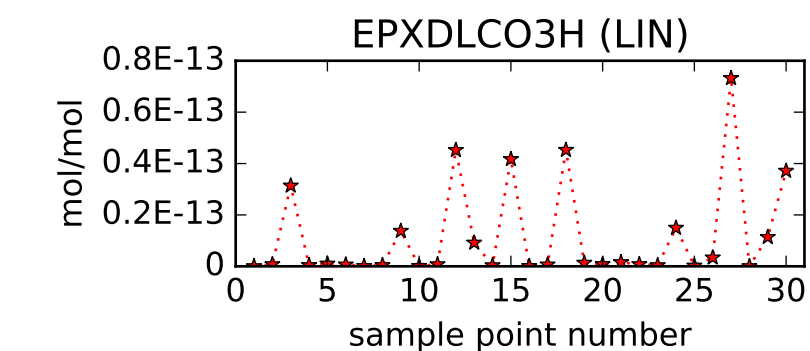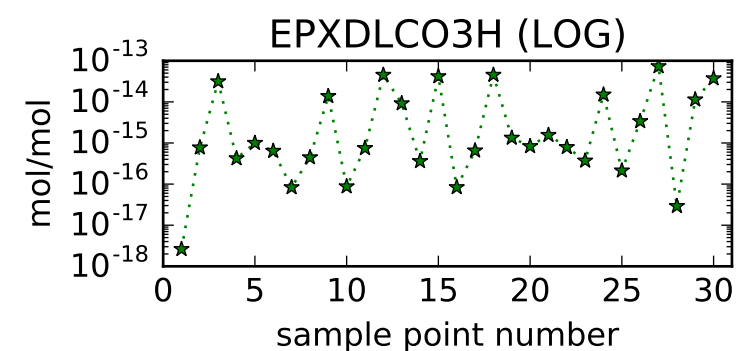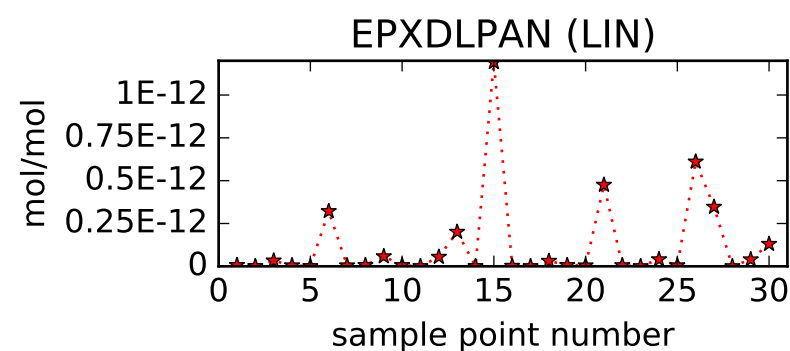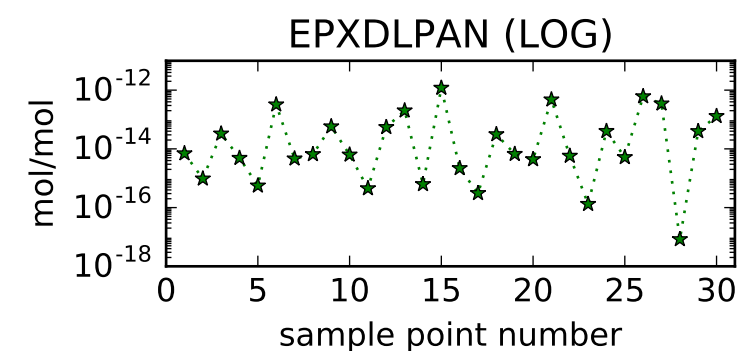

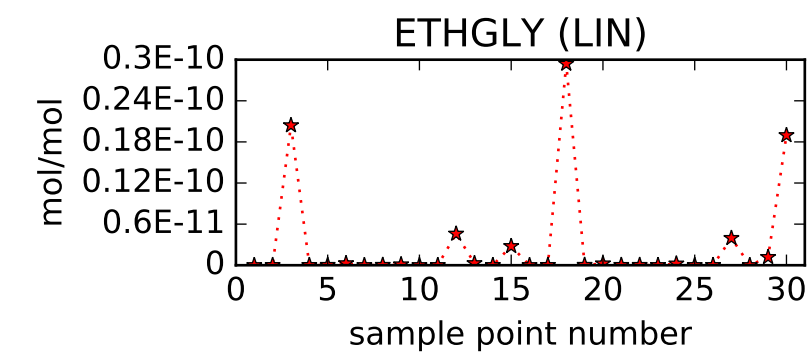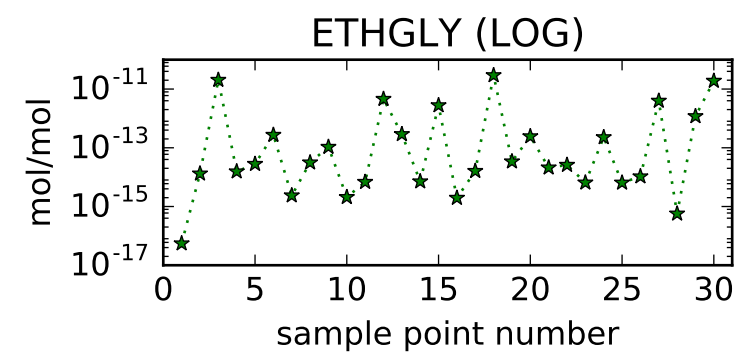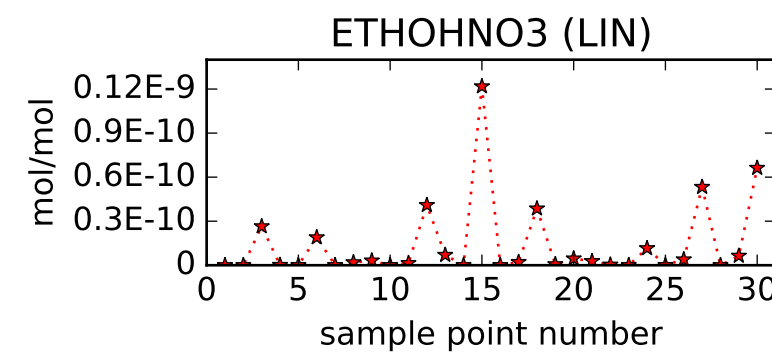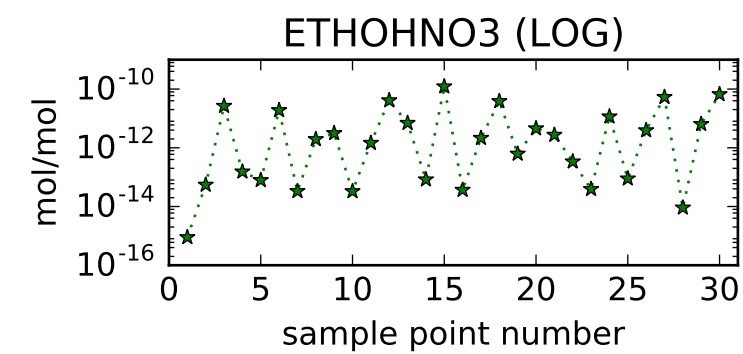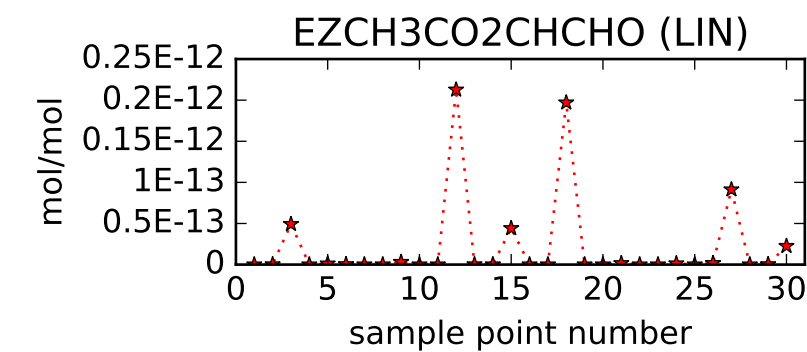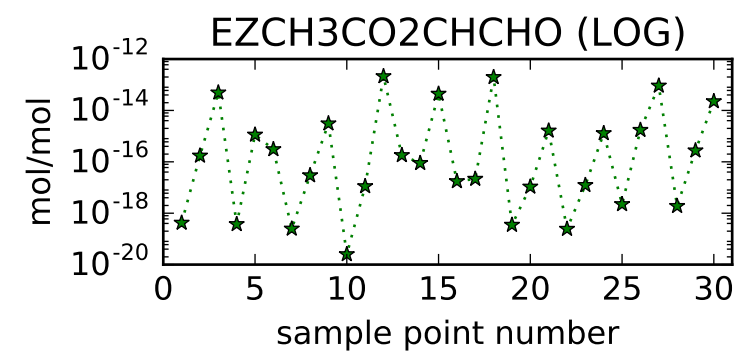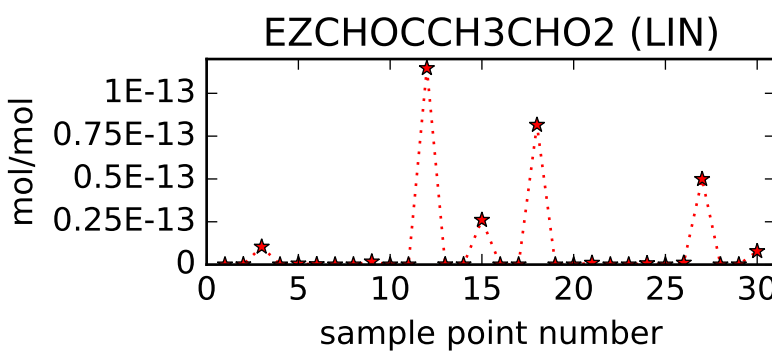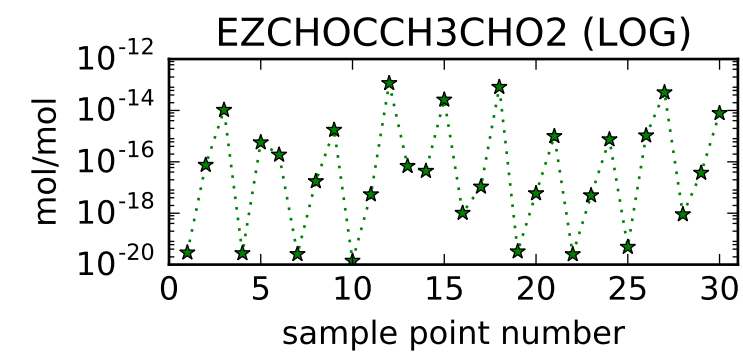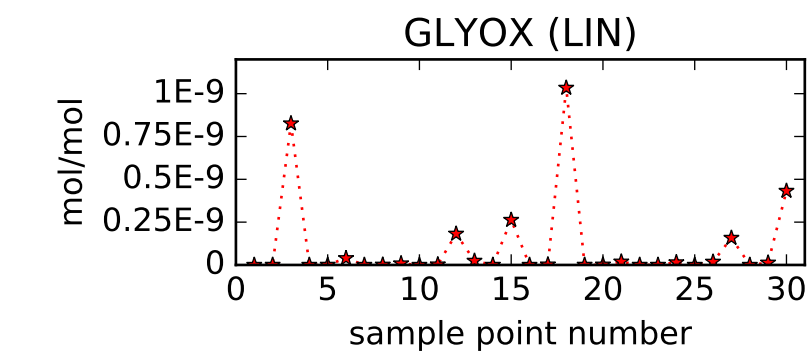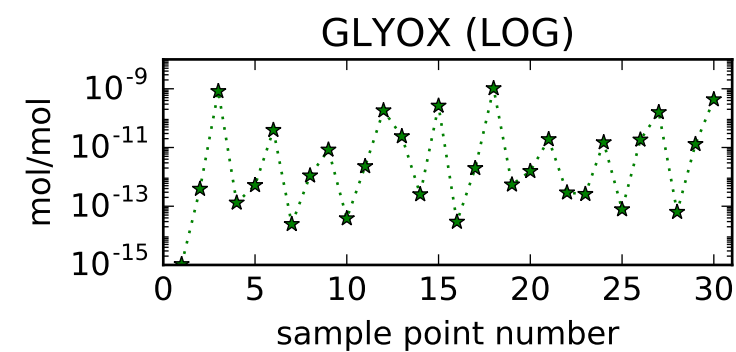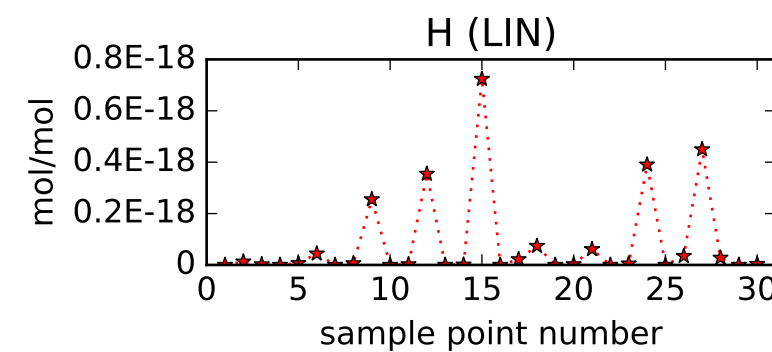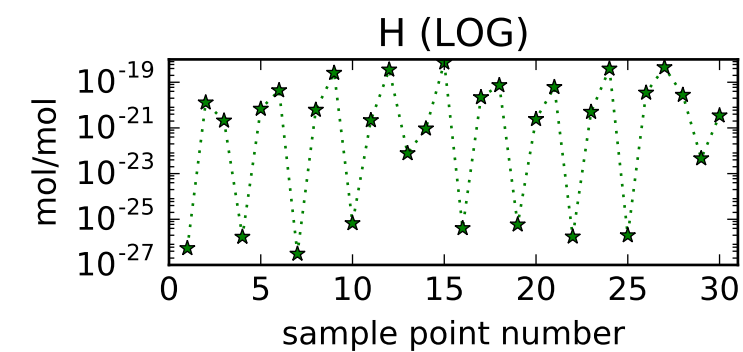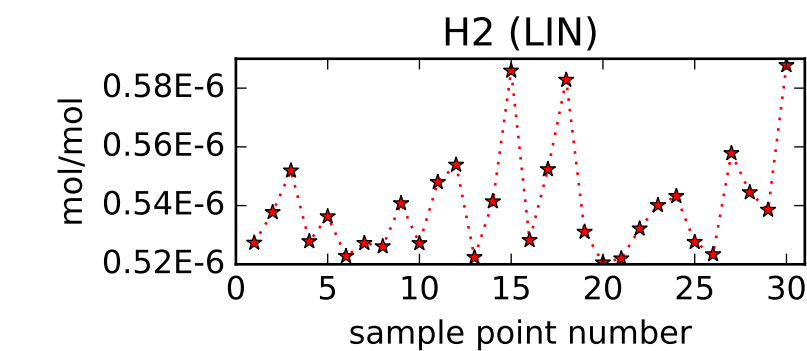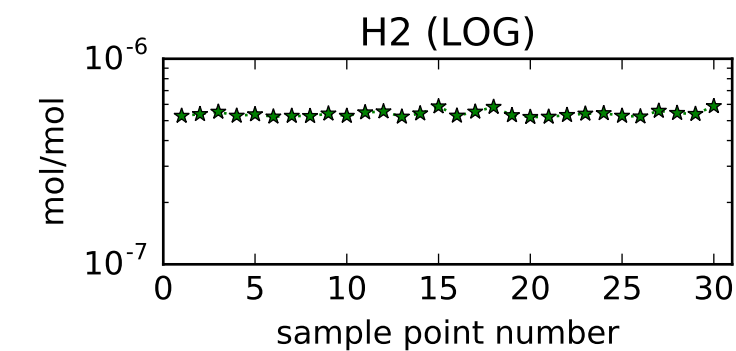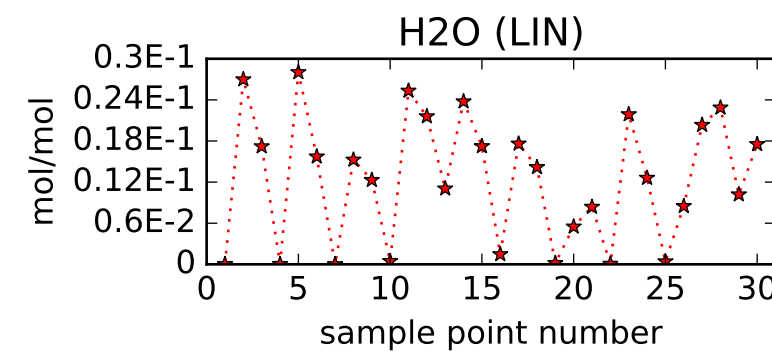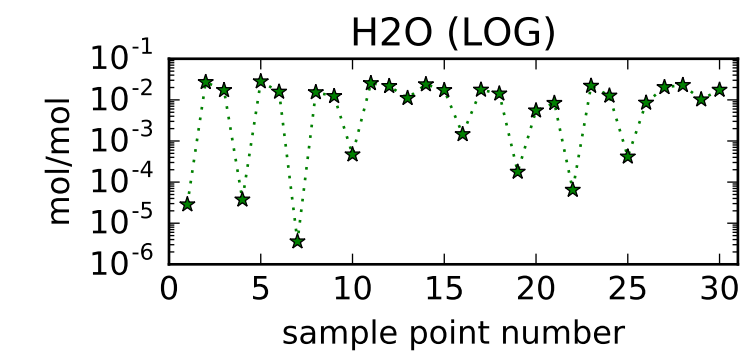

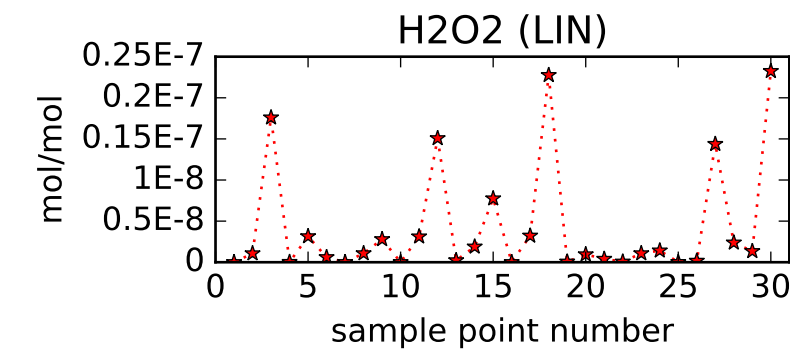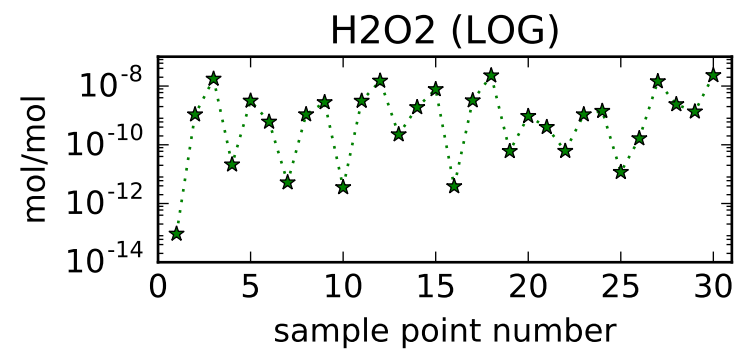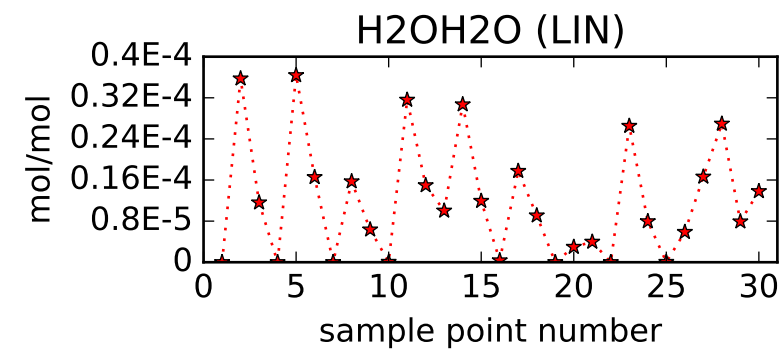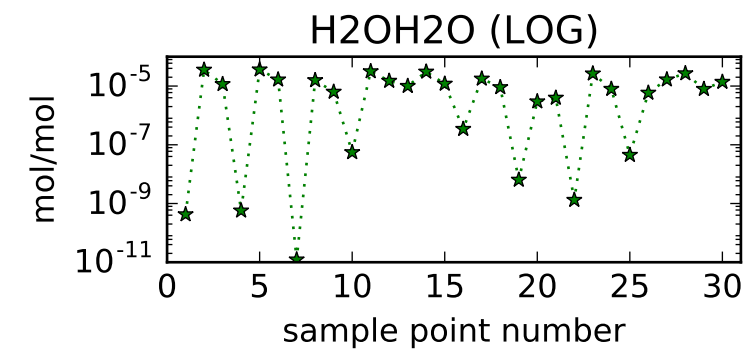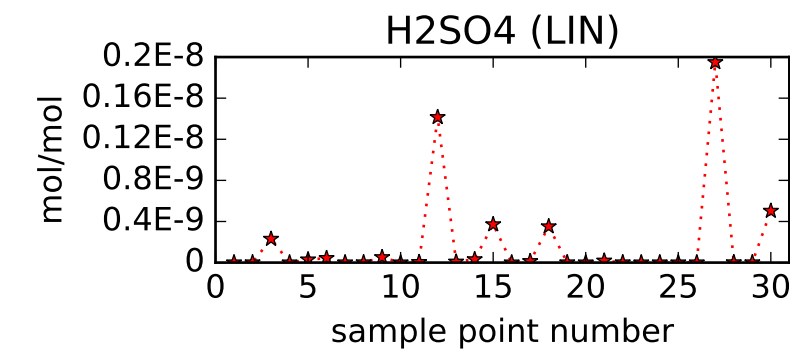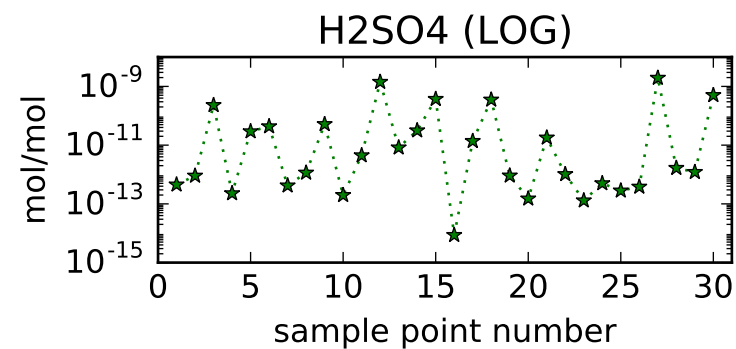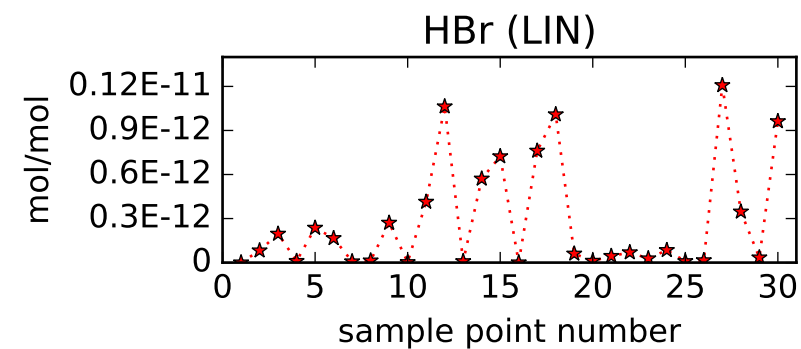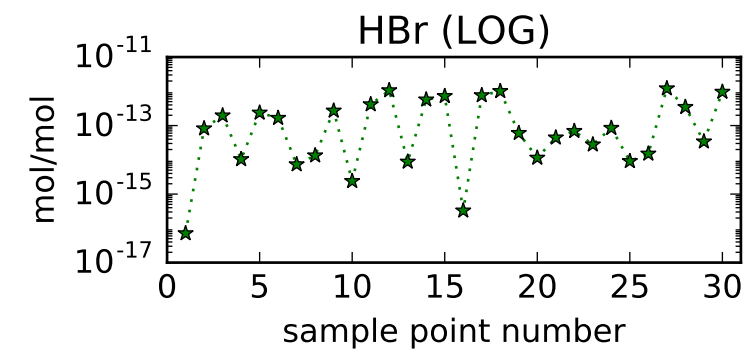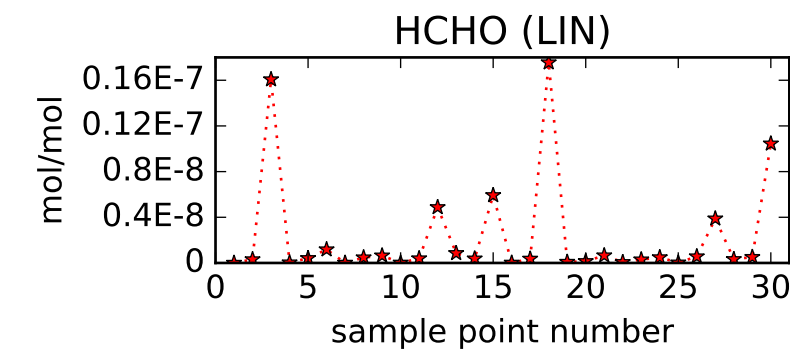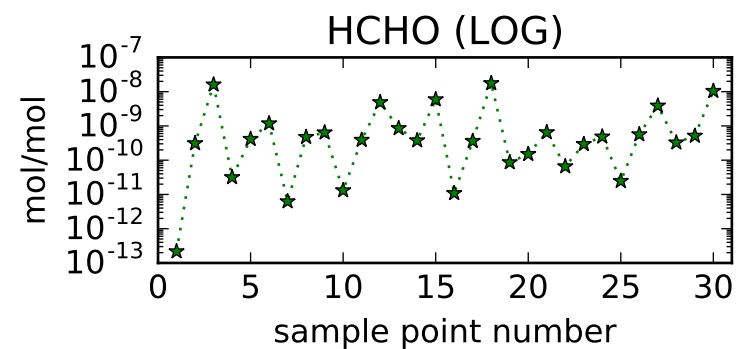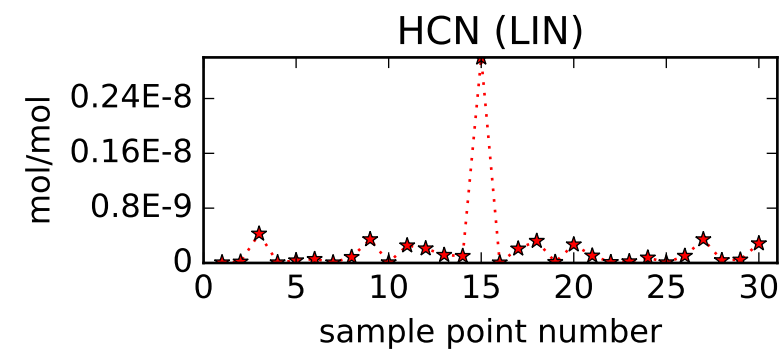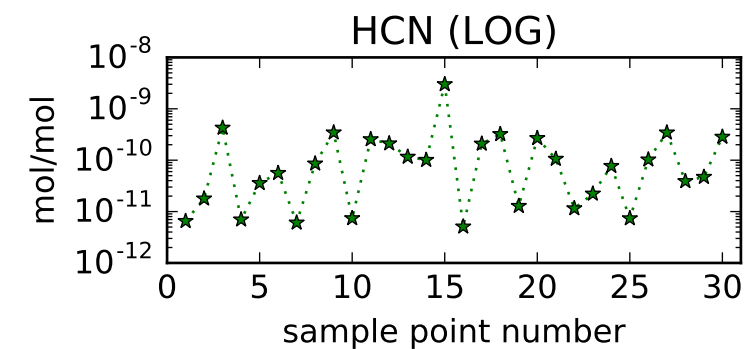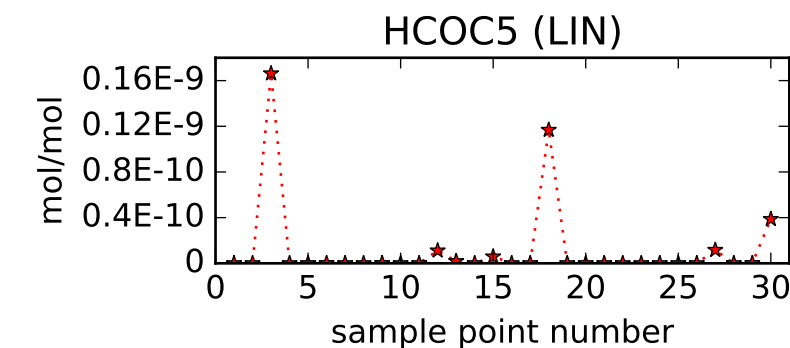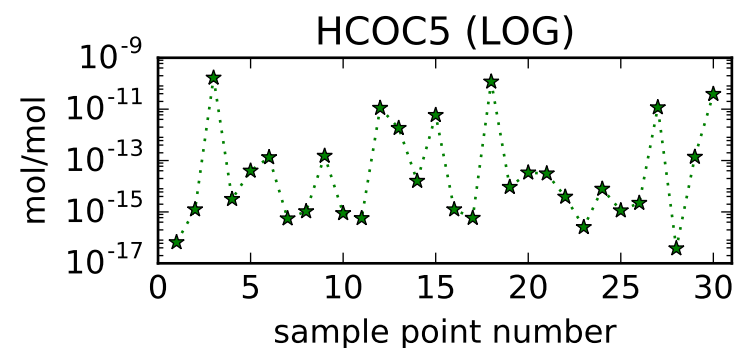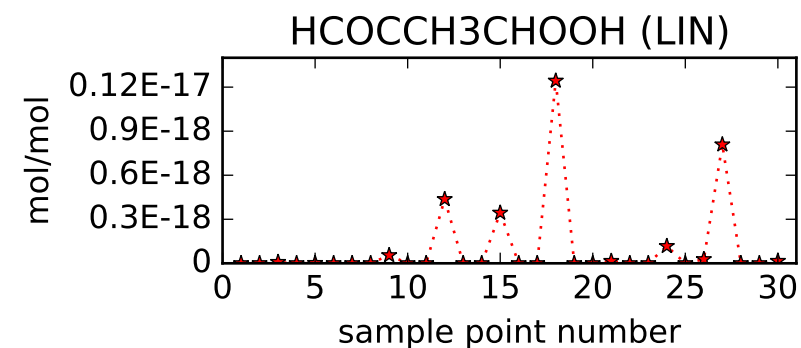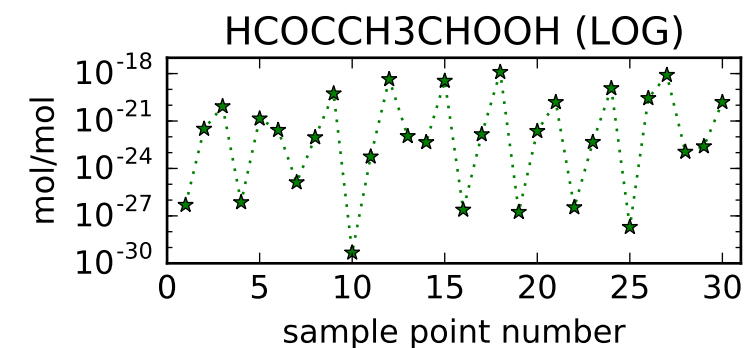

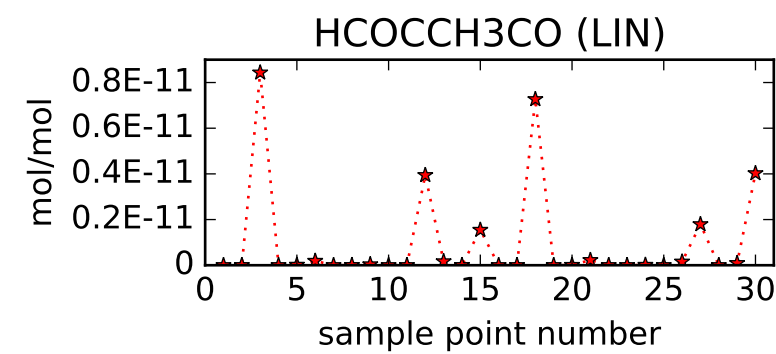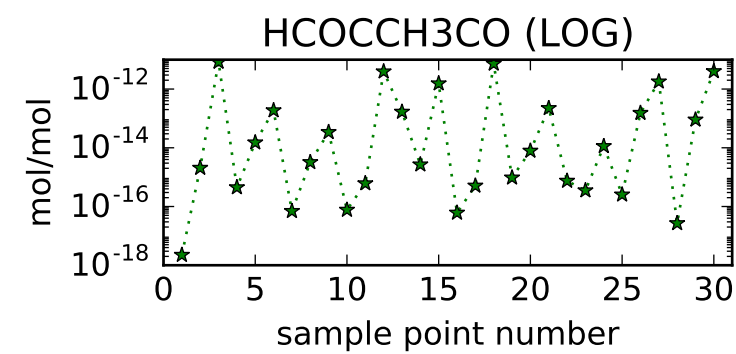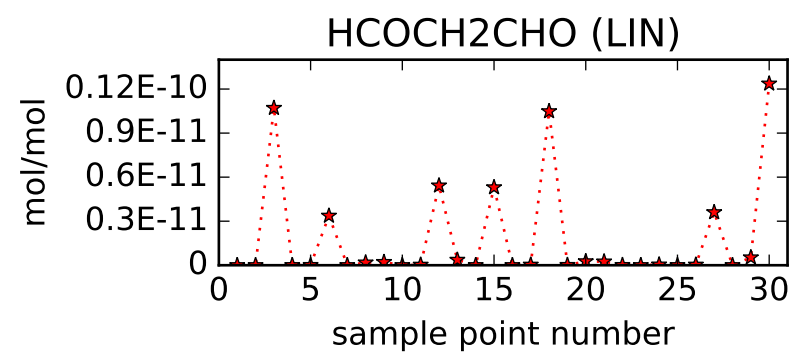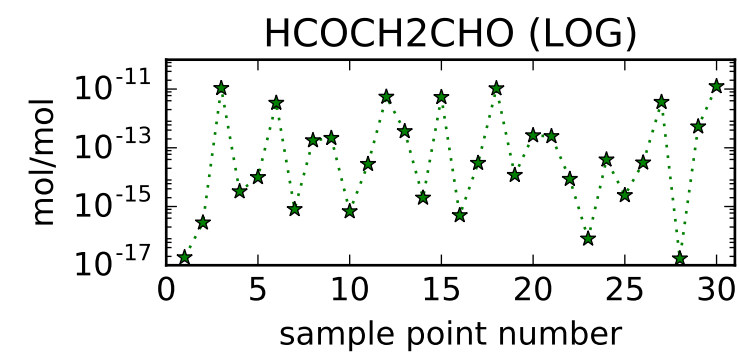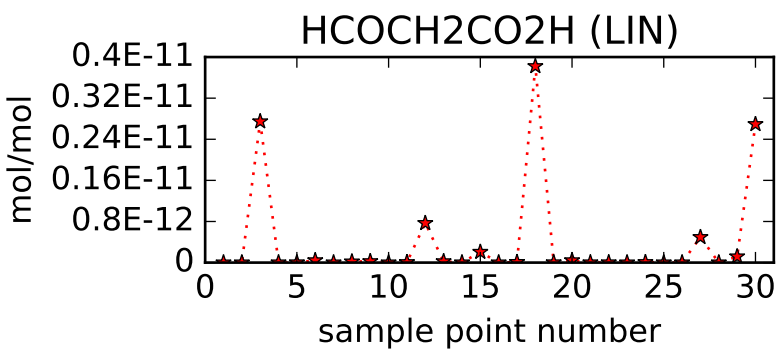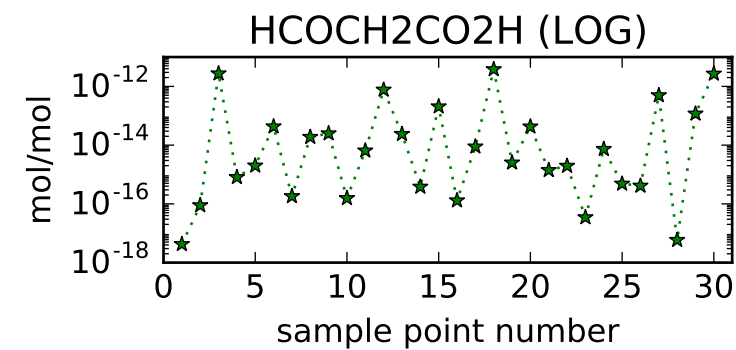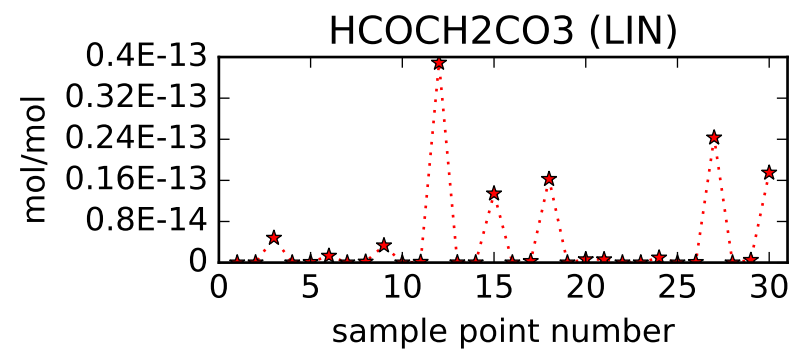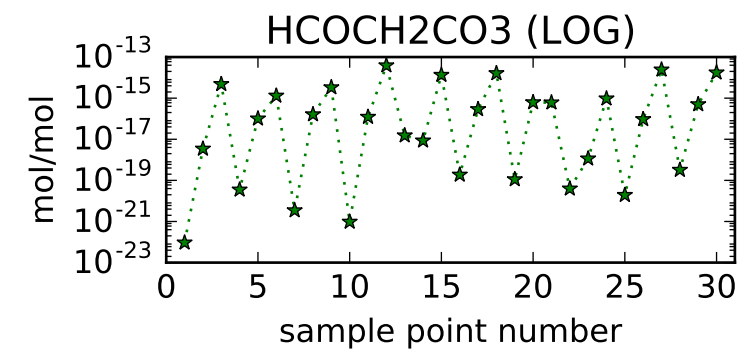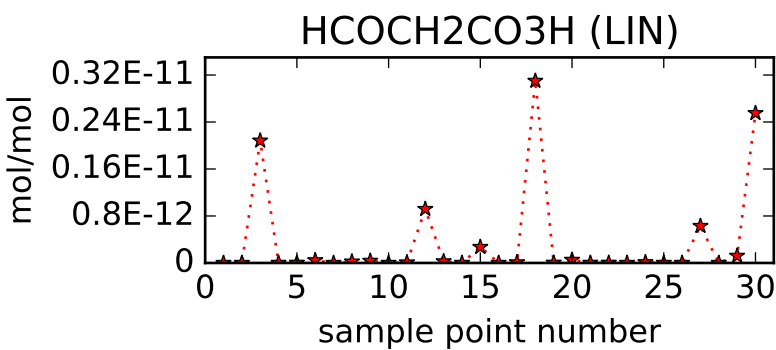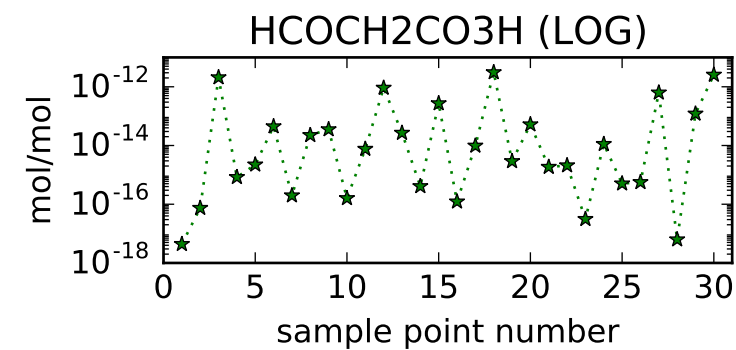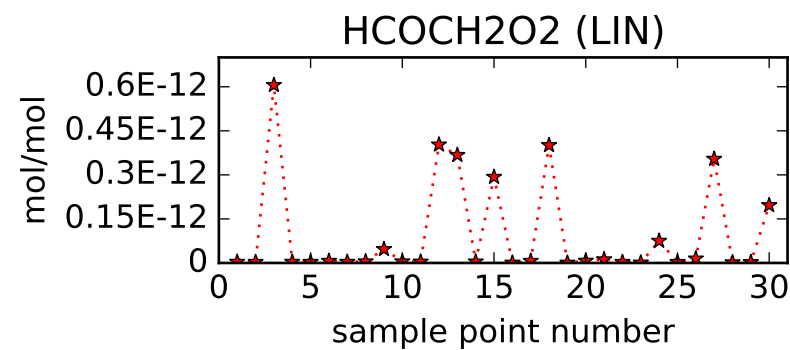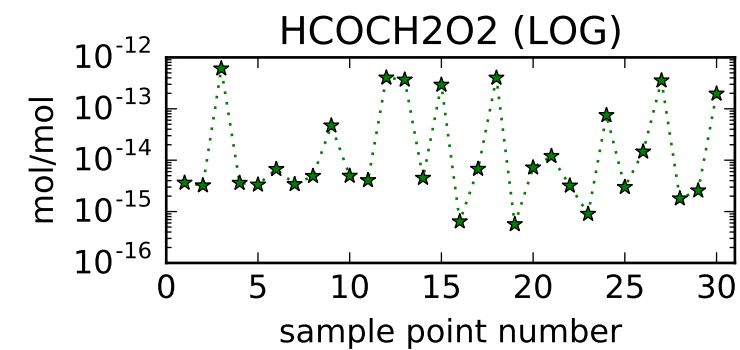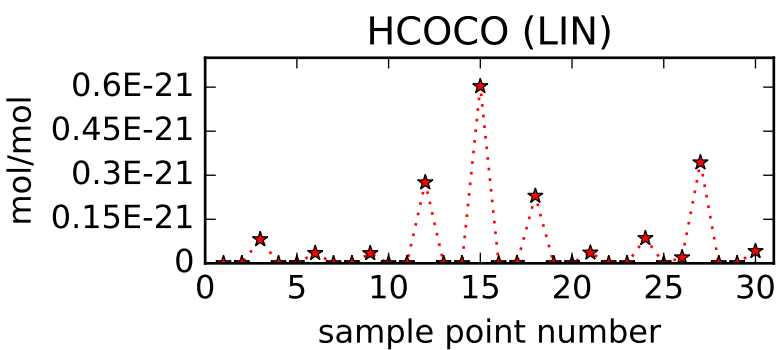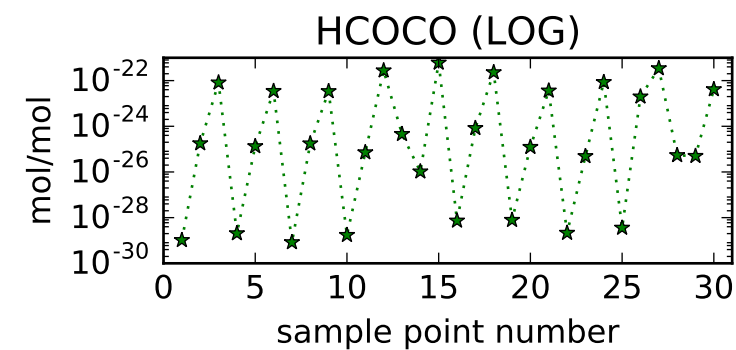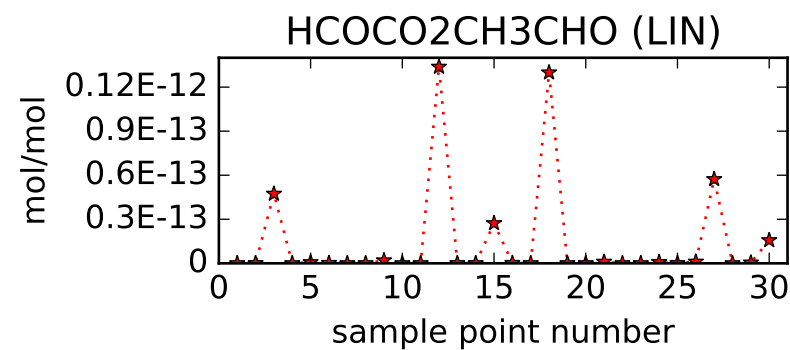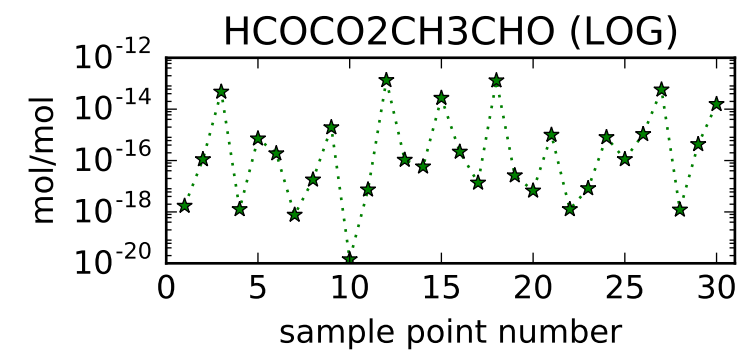

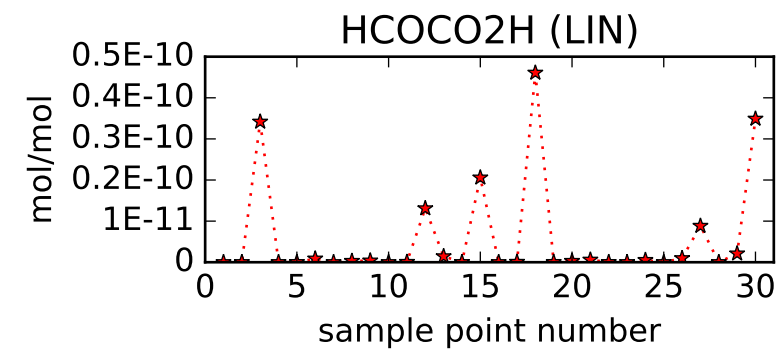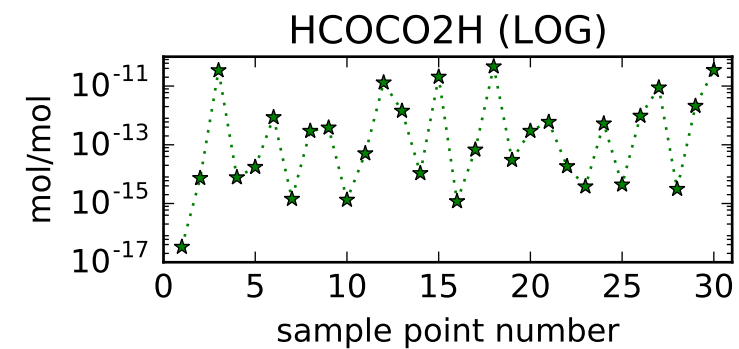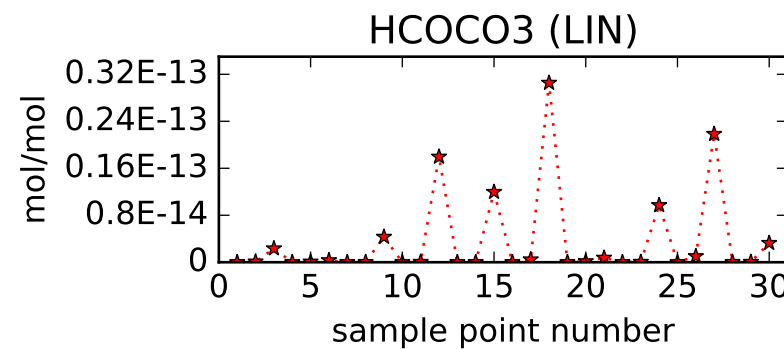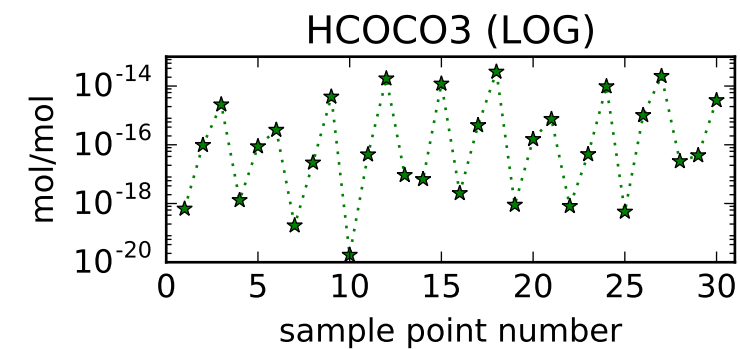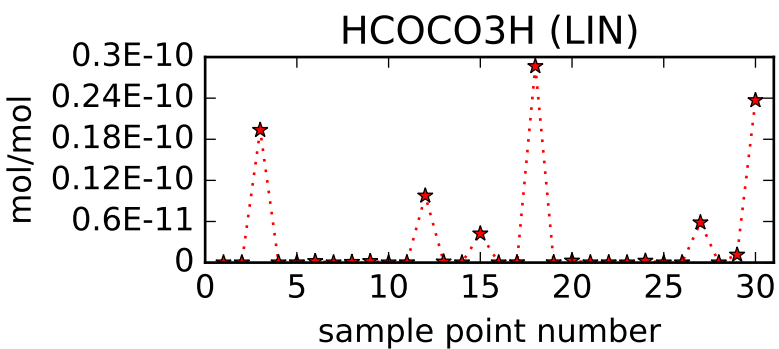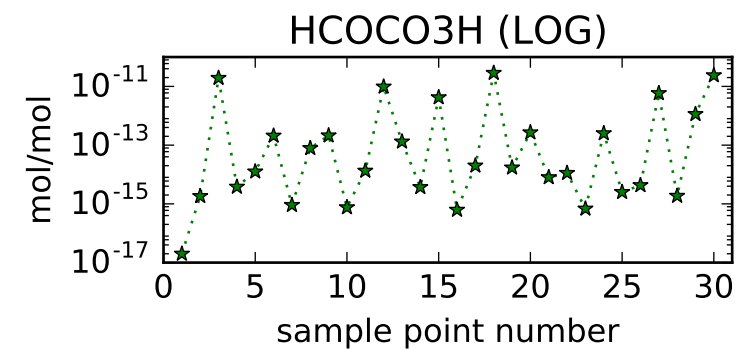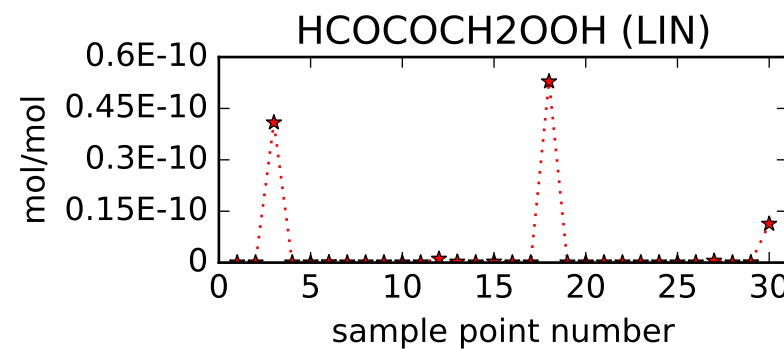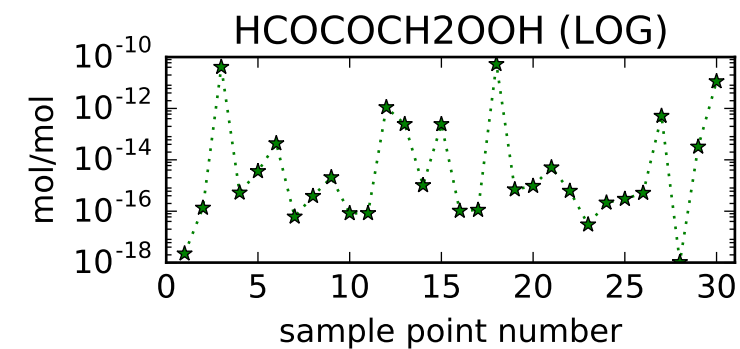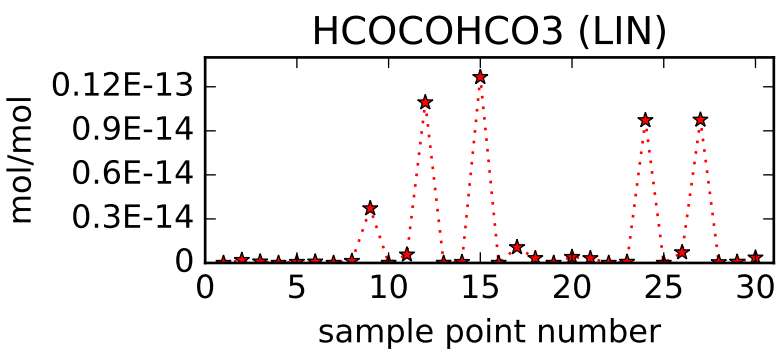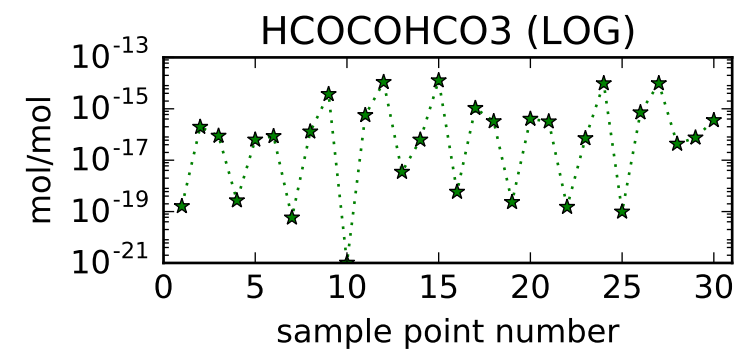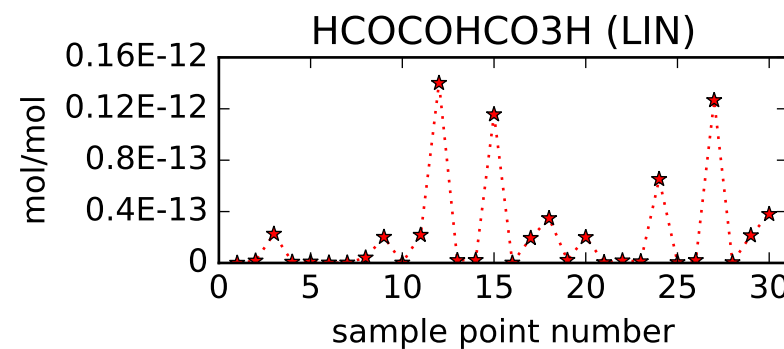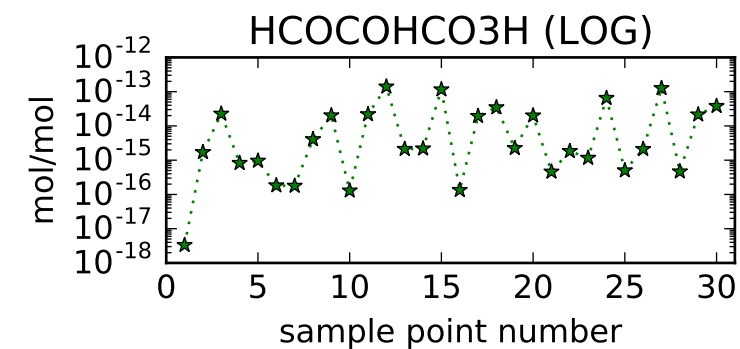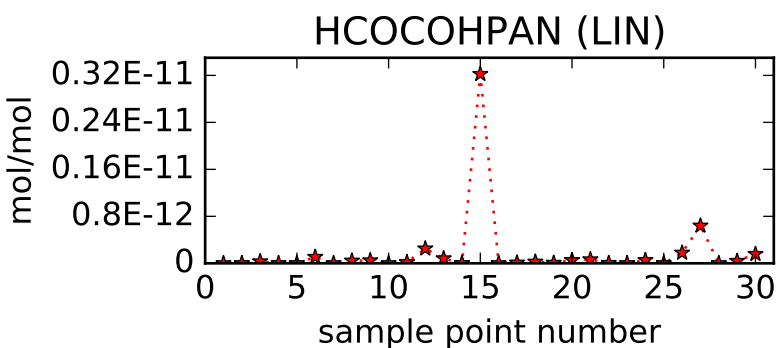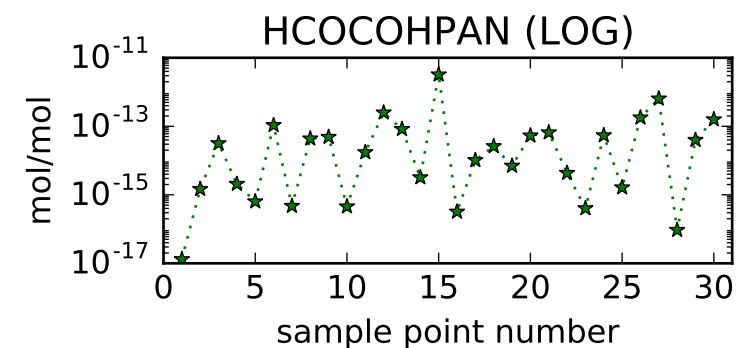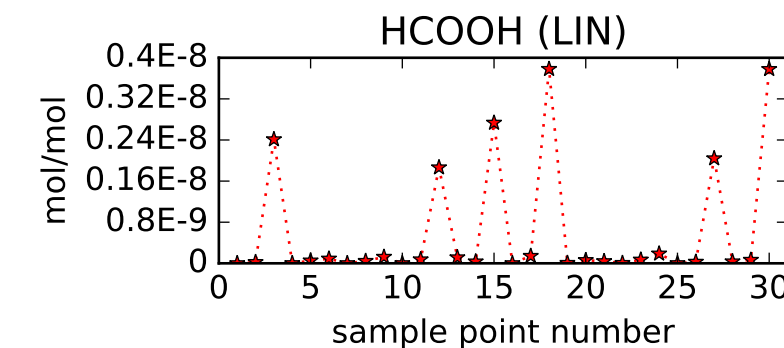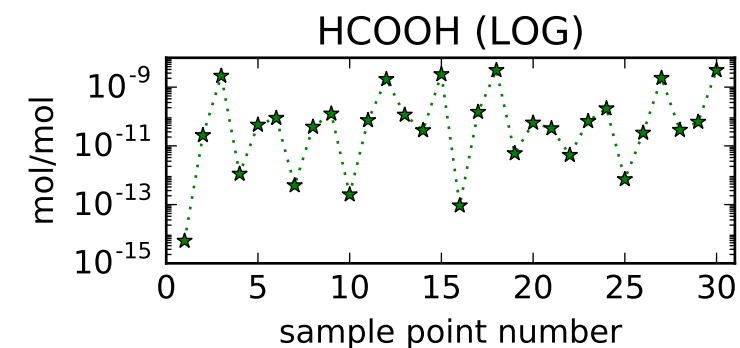



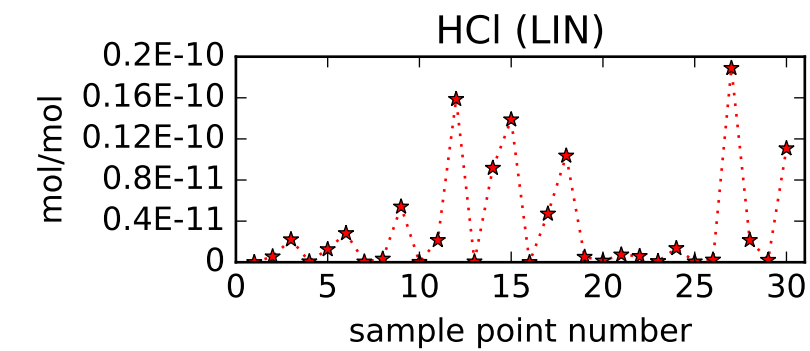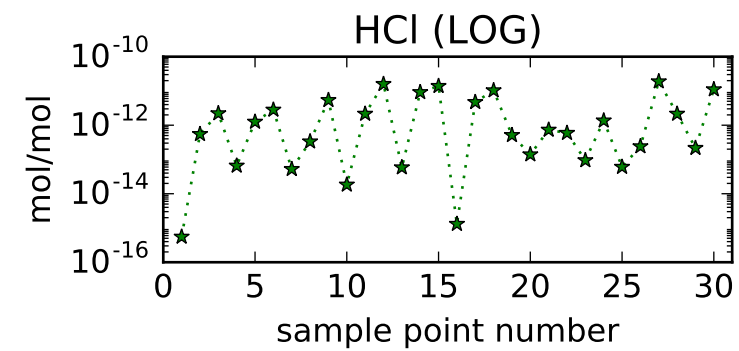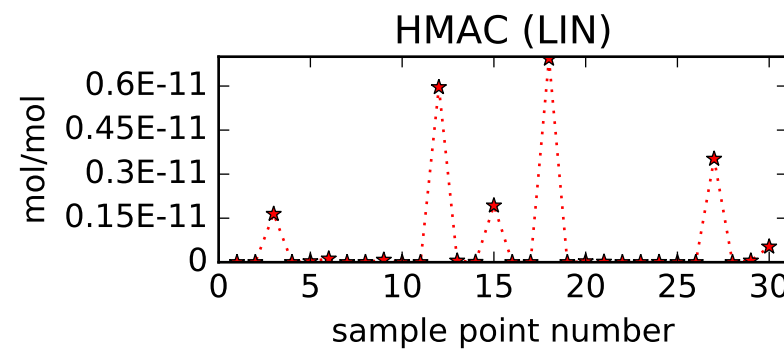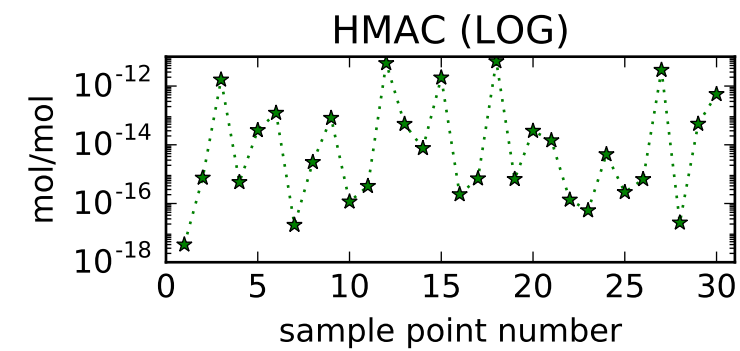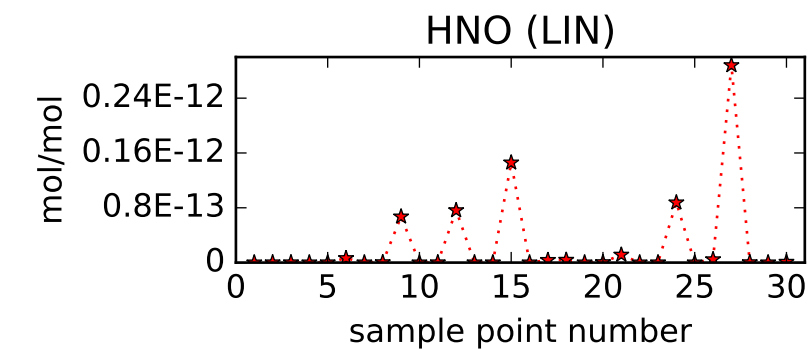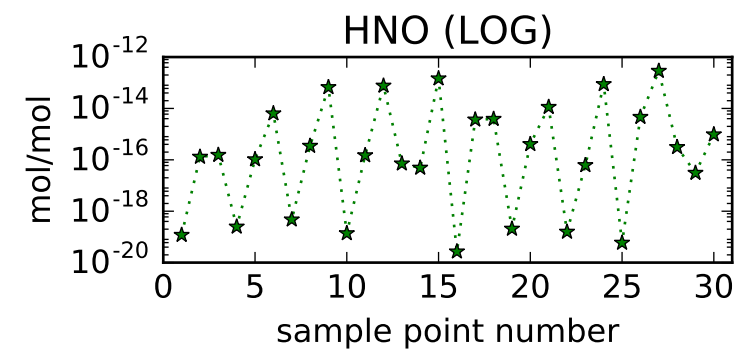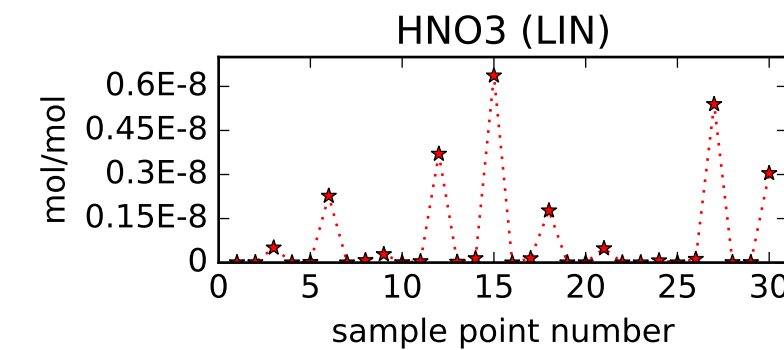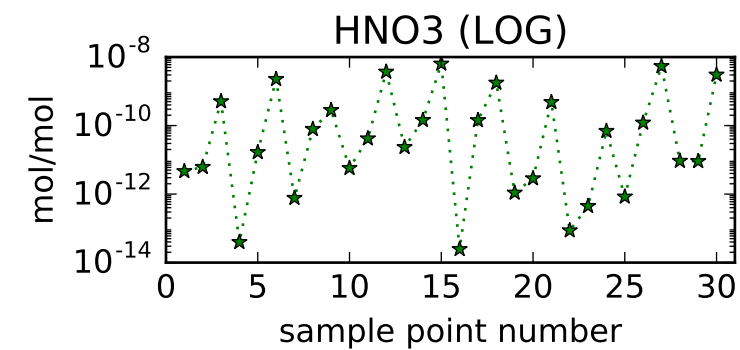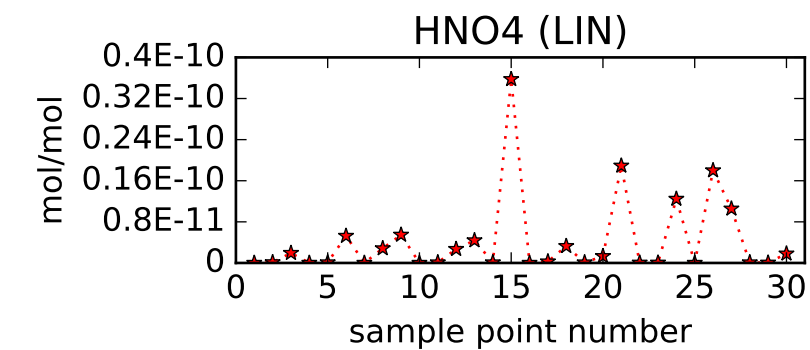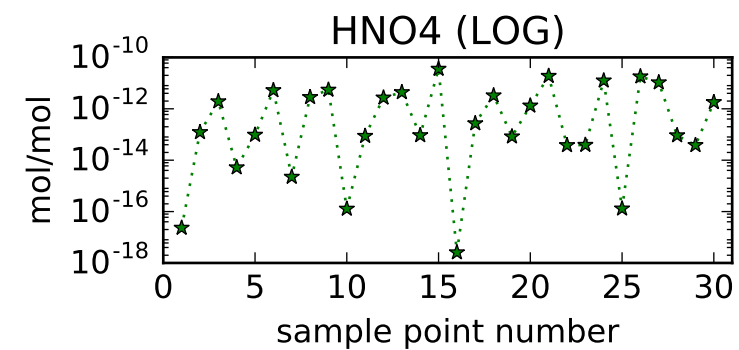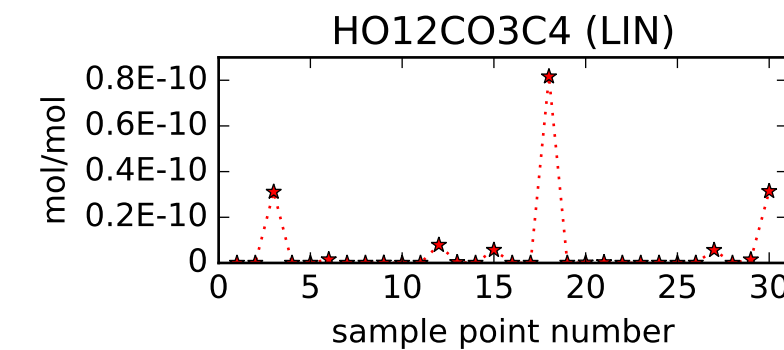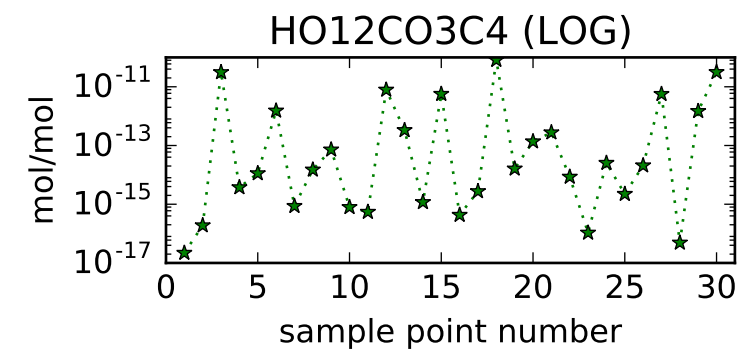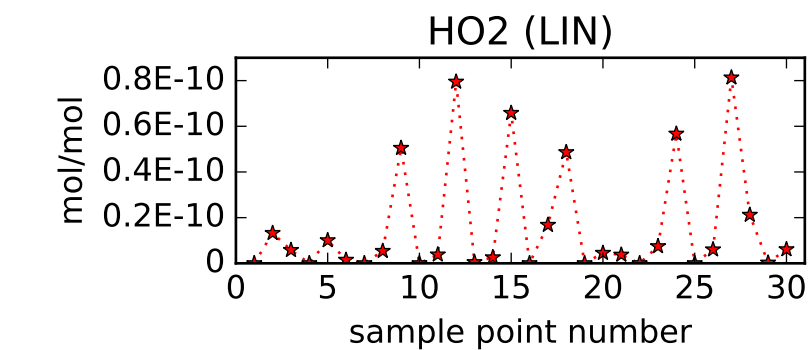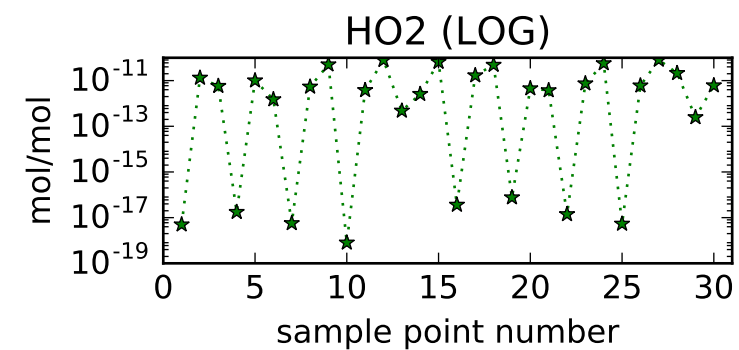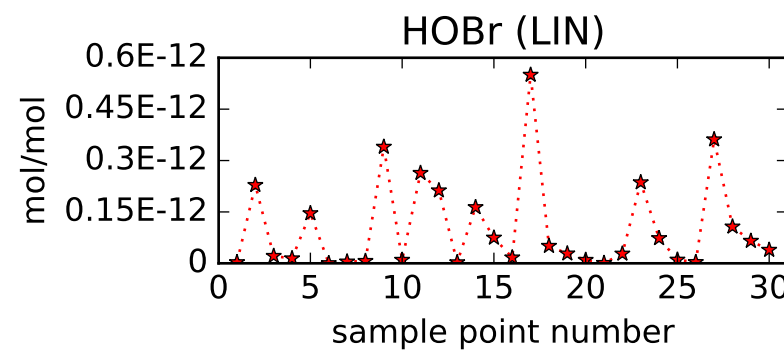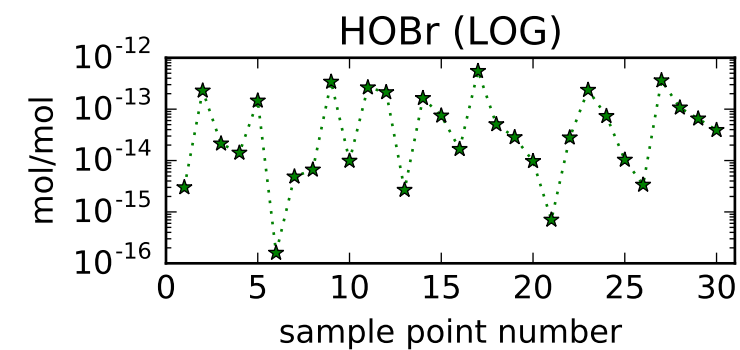

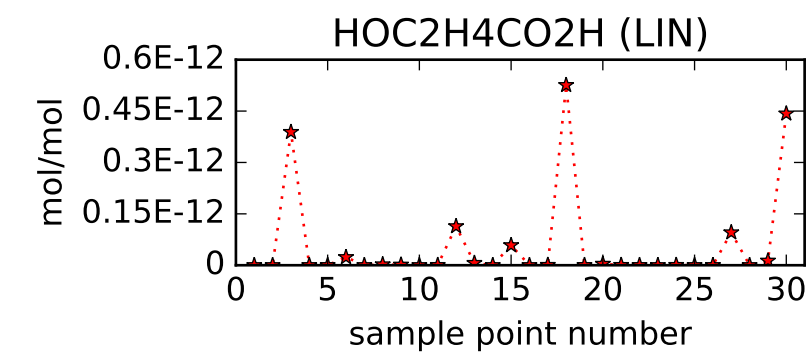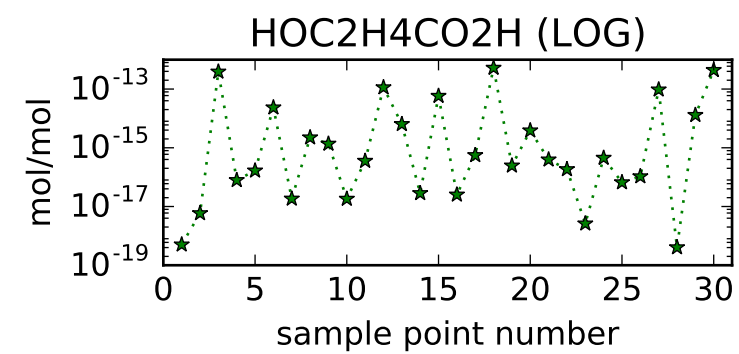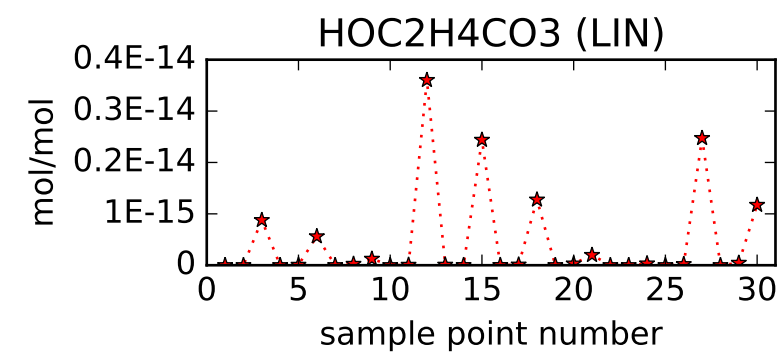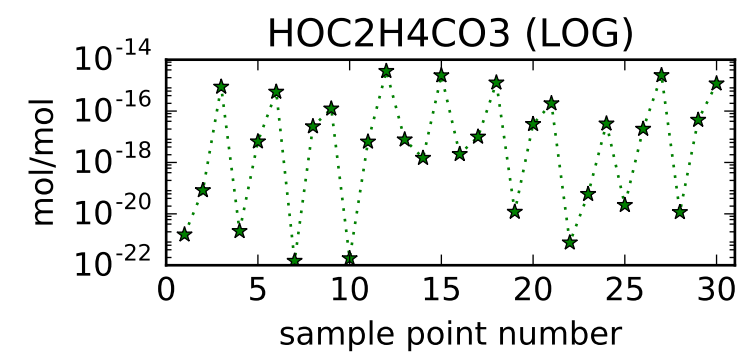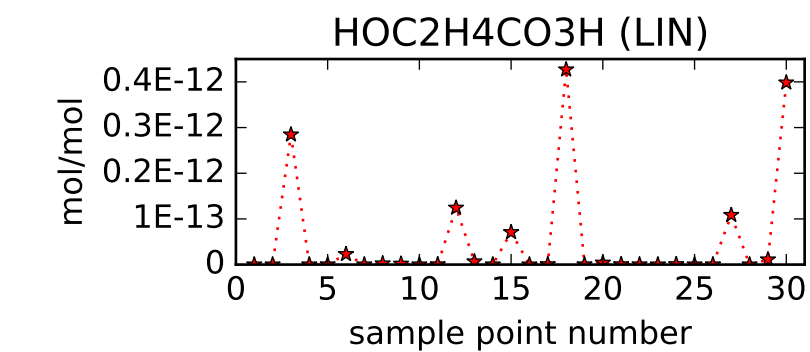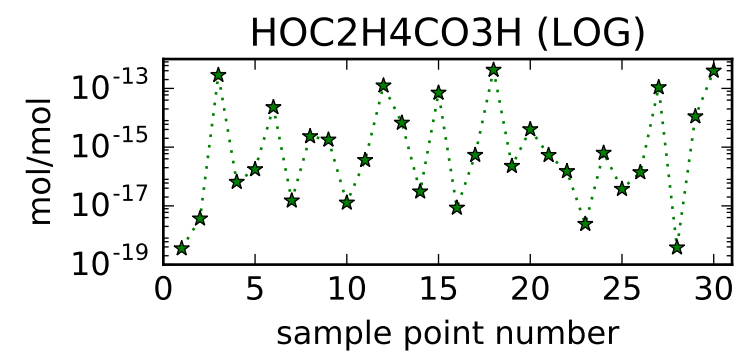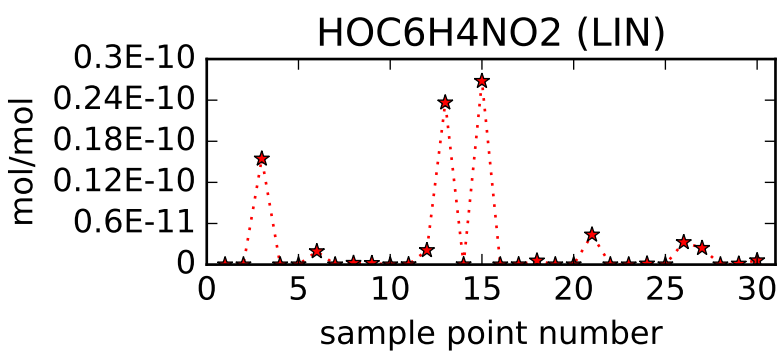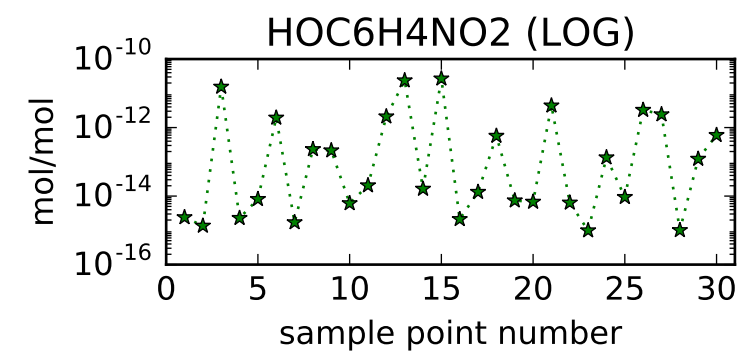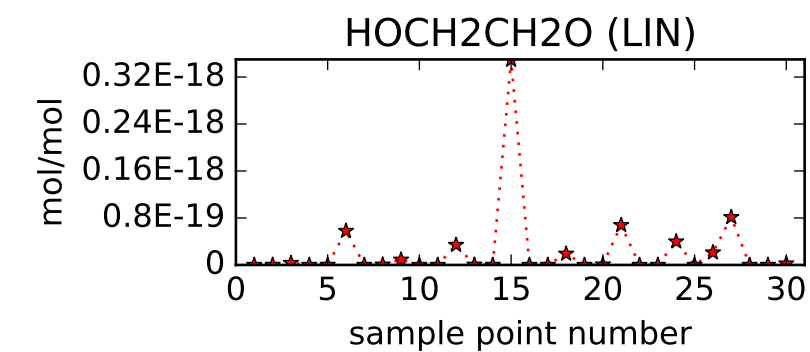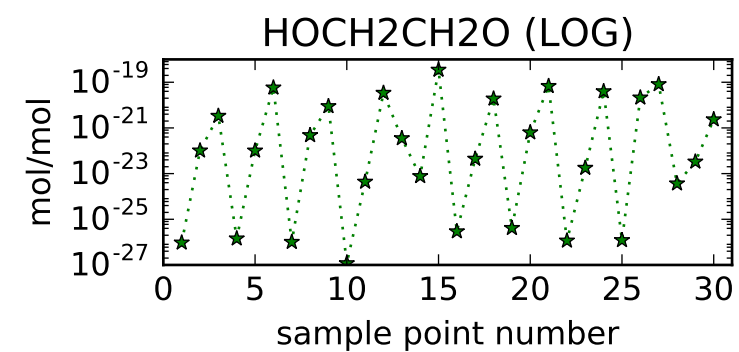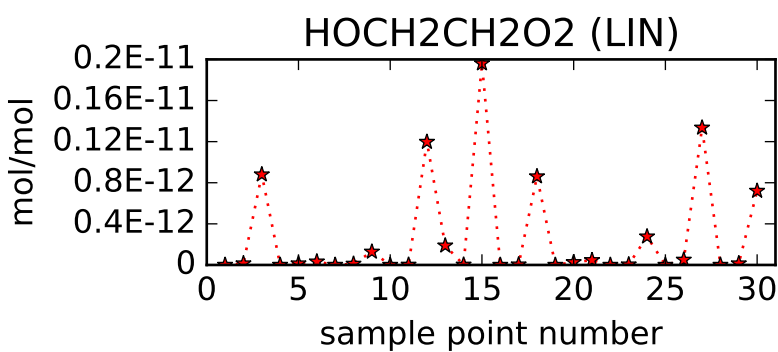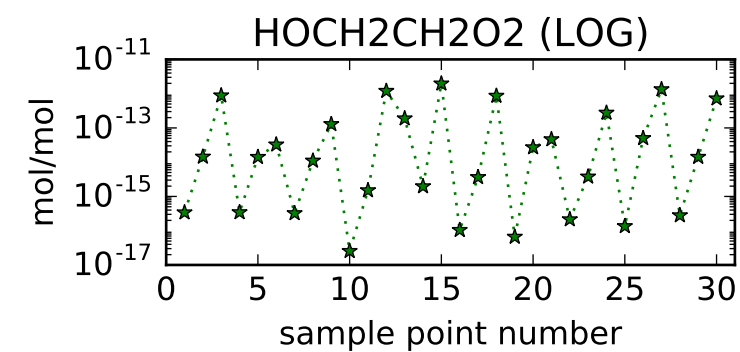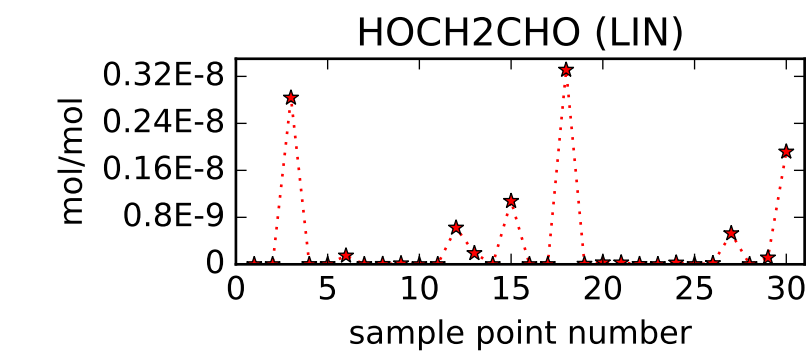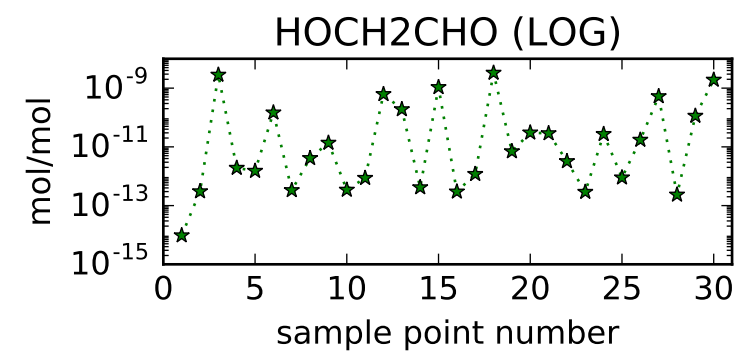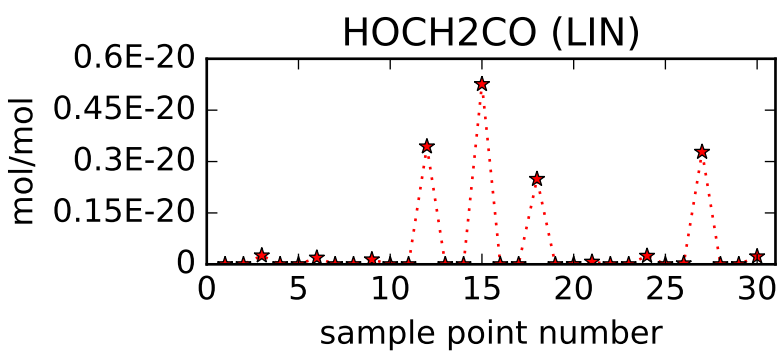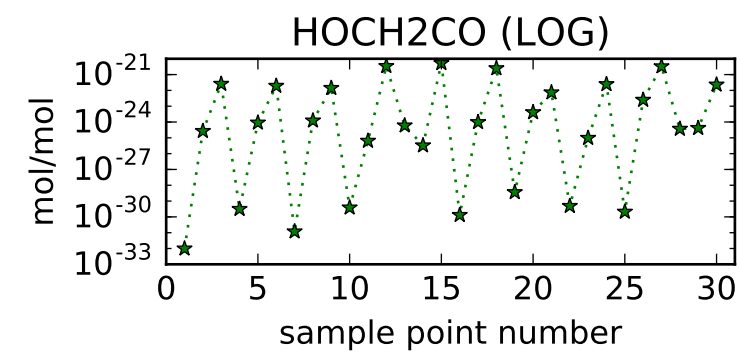

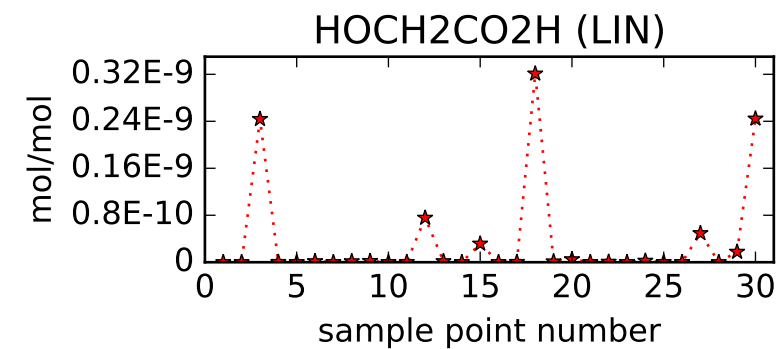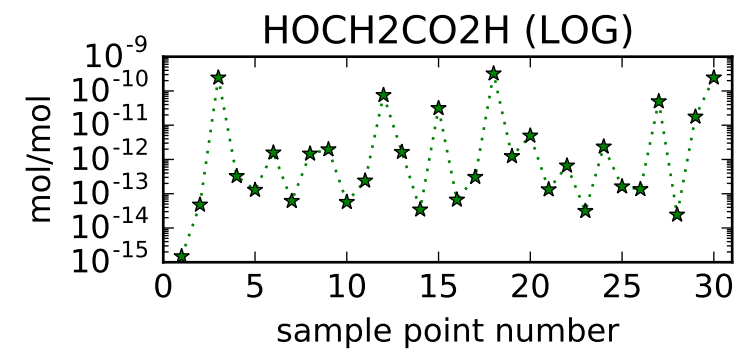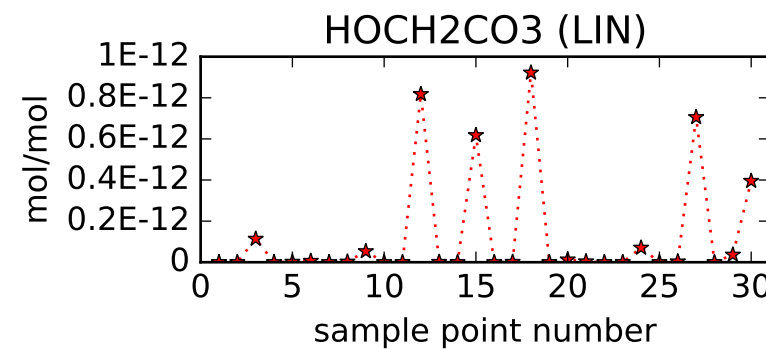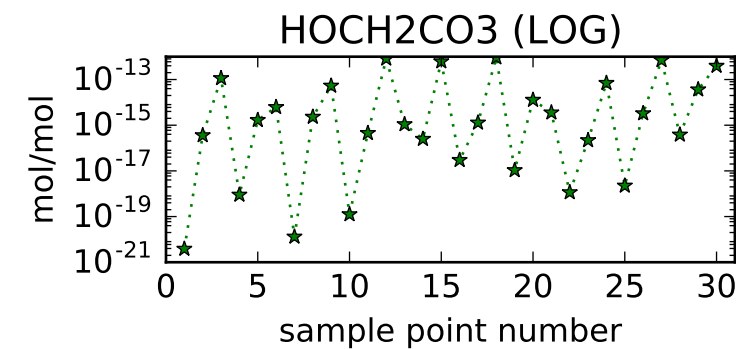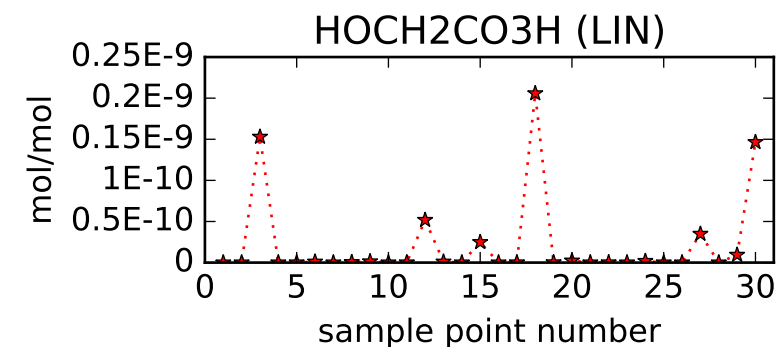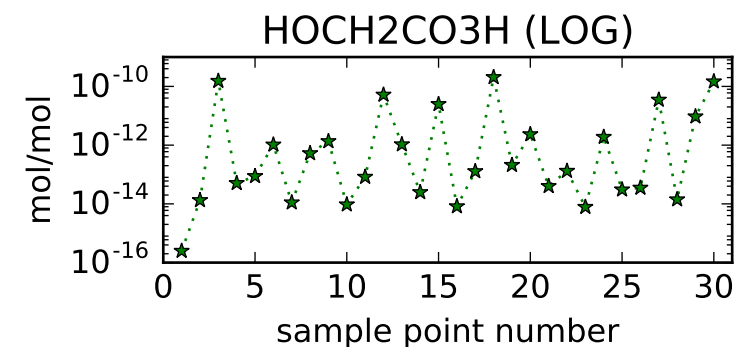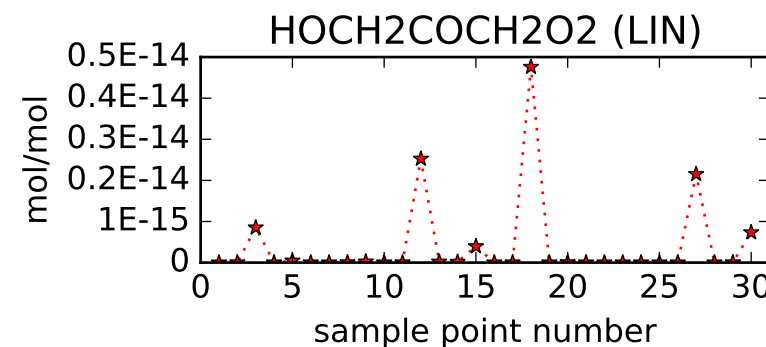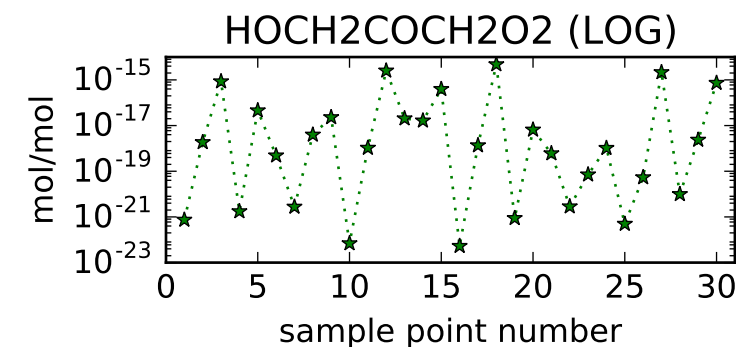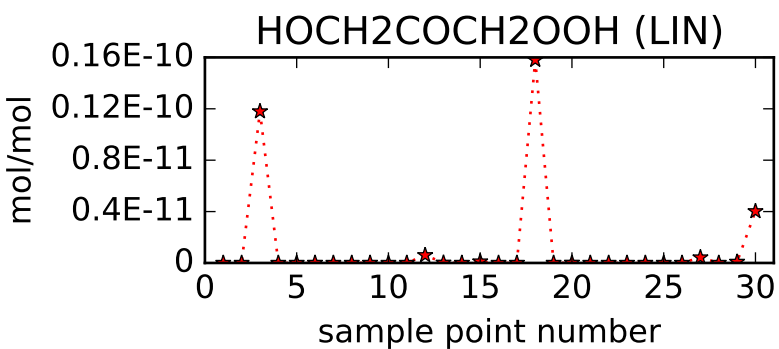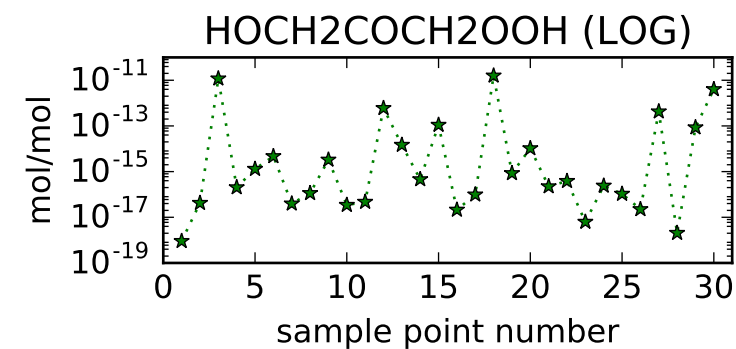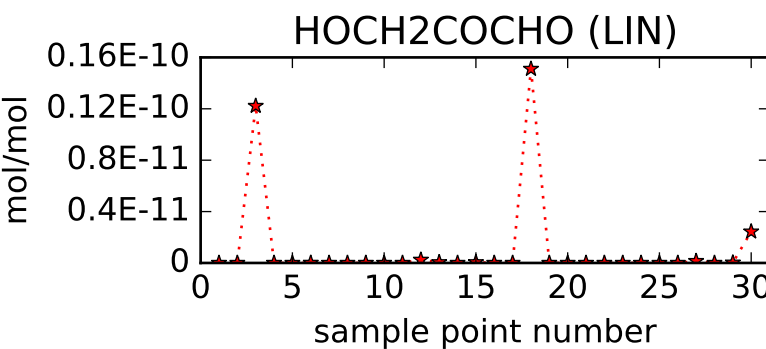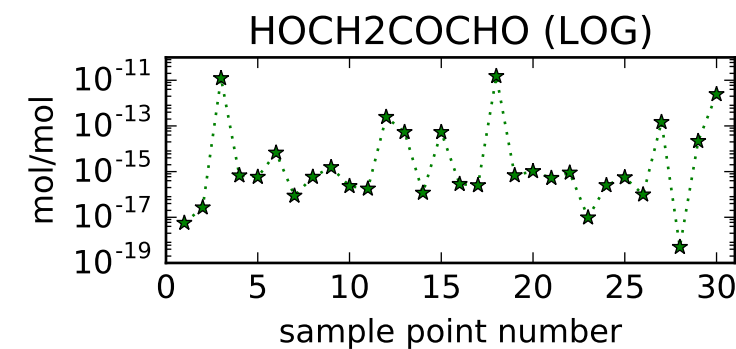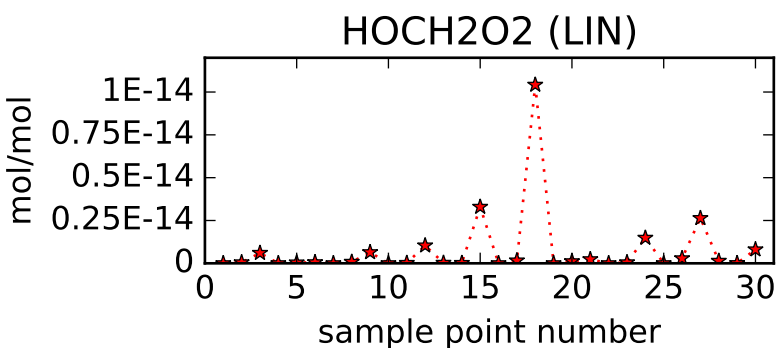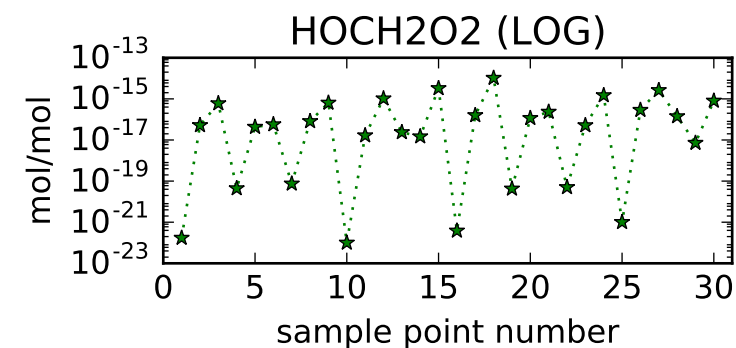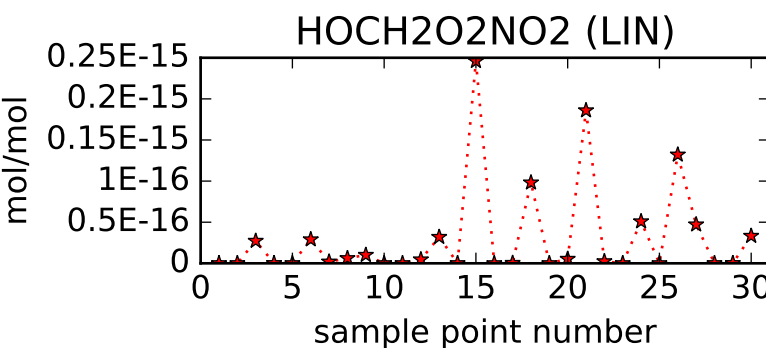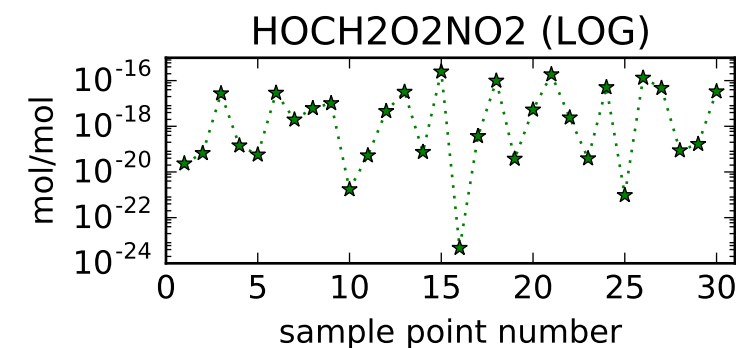

HOCH<sub>2</sub>OH (LIN)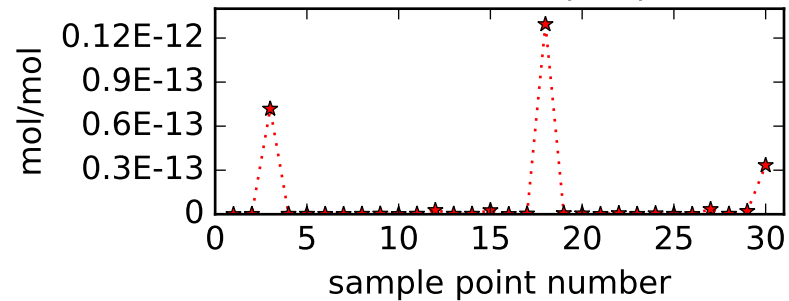HOCH<sub>2</sub>OH (LOG)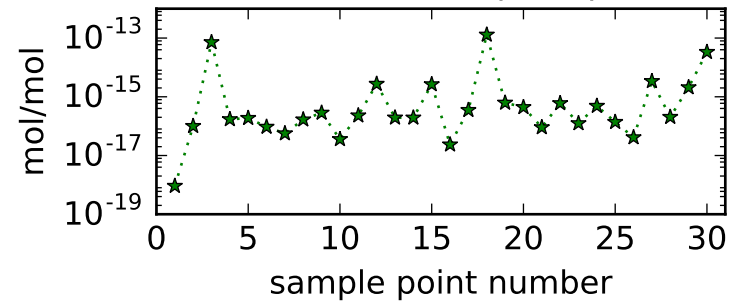HOCH<sub>2</sub>OOH (LIN)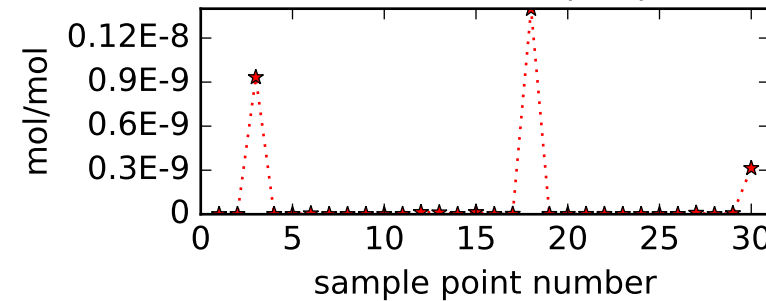HOCH<sub>2</sub>OOH (LOG)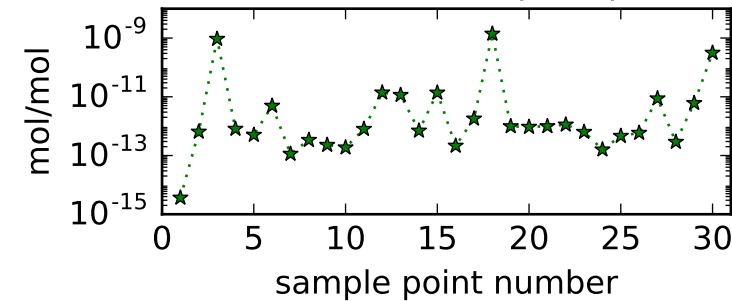

HOCHCHO (LIN)

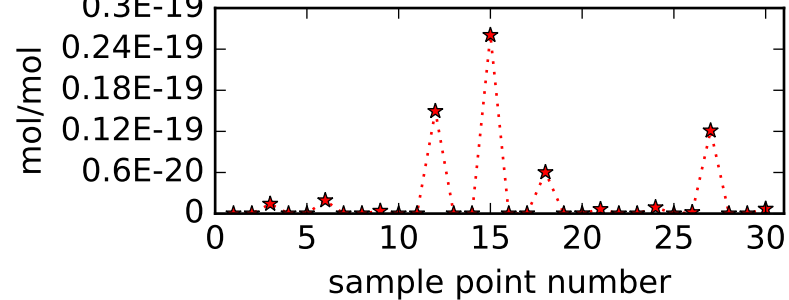

HOCHCHO (LOG)

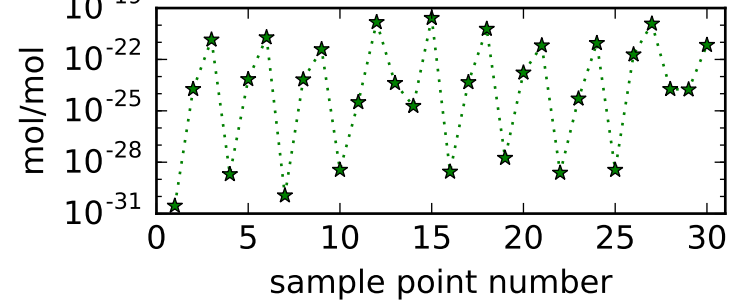HOCOC<sub>4</sub>DIAL (LIN)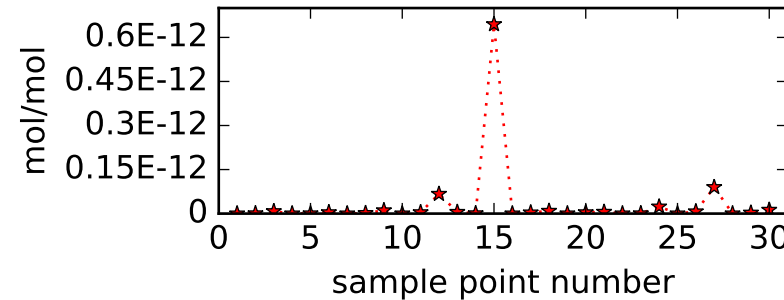HOCOC<sub>4</sub>DIAL (LOG)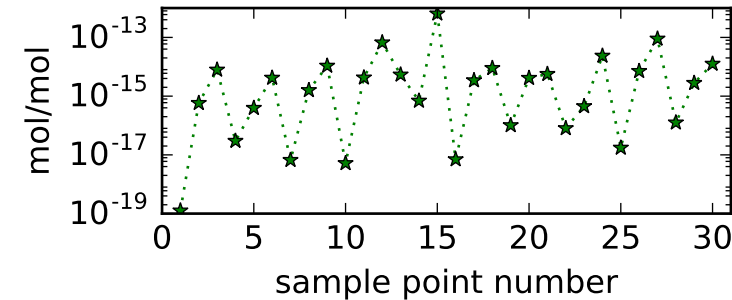

HOCl (LIN)

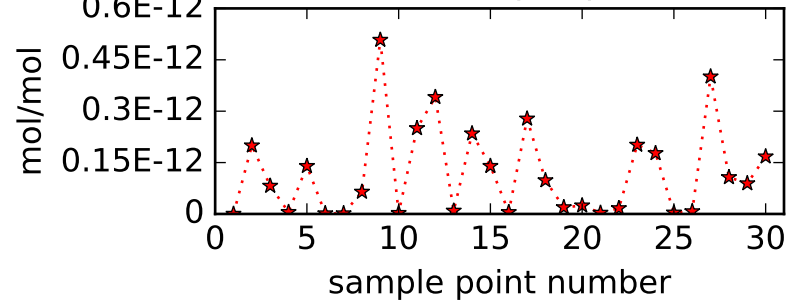

HOCl (LOG)

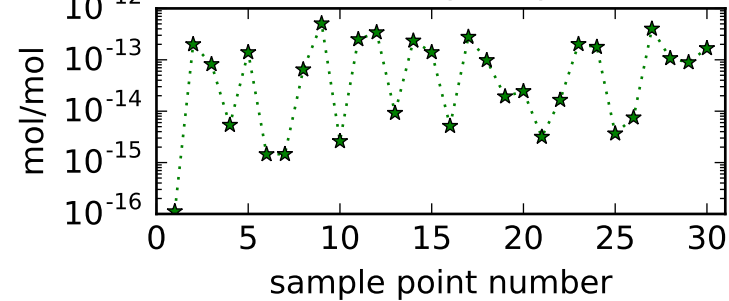

HONO (LIN)

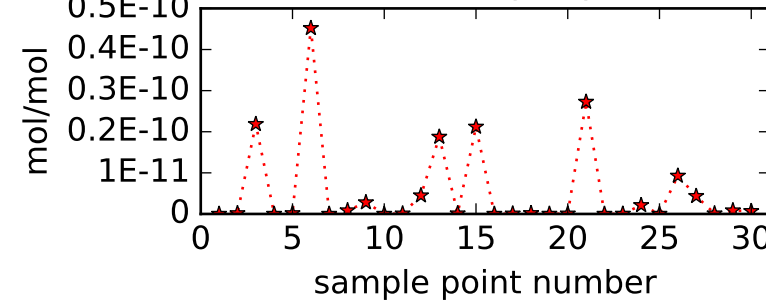

HONO (LOG)

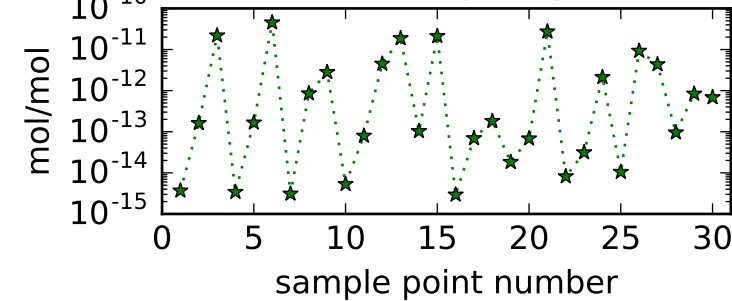HOOCH<sub>2</sub>CHO (LIN)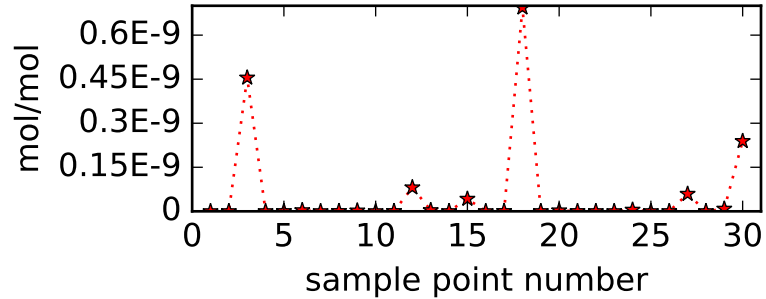HOOCH<sub>2</sub>CHO (LOG)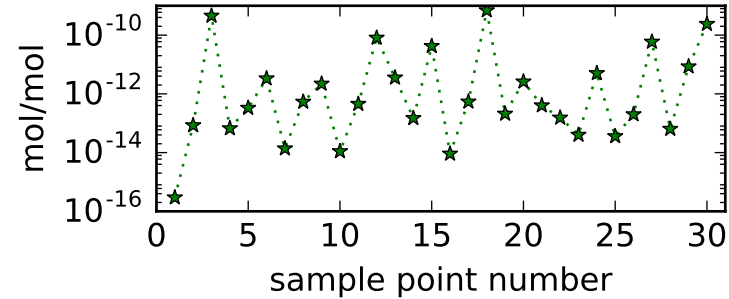HOOCH<sub>2</sub>CO<sub>2</sub>H (LIN)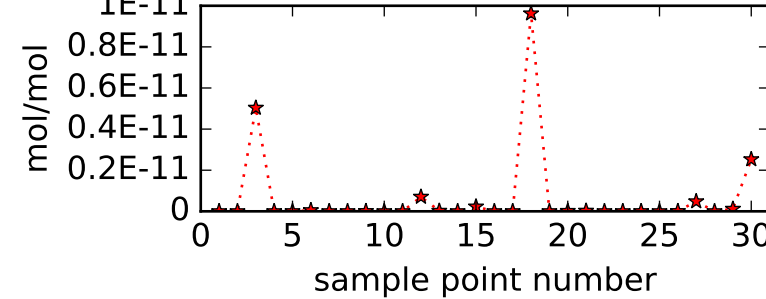HOOCH<sub>2</sub>CO<sub>2</sub>H (LOG)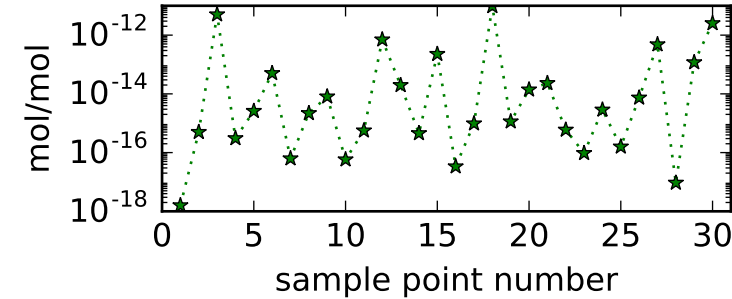

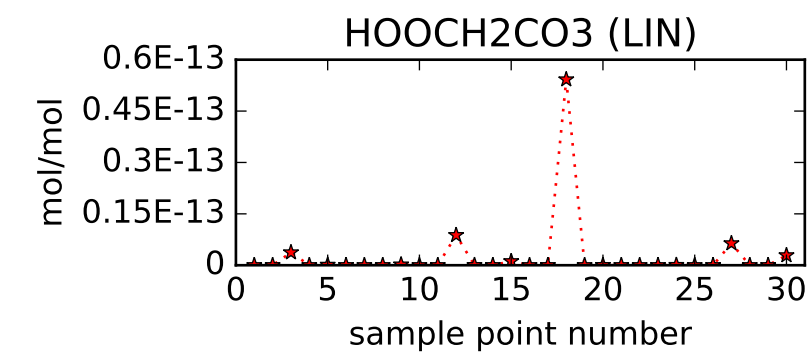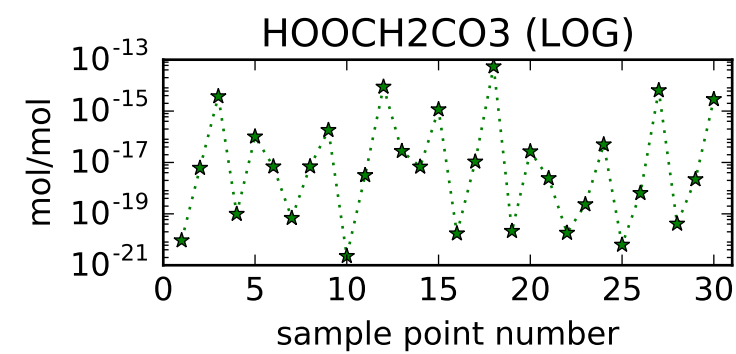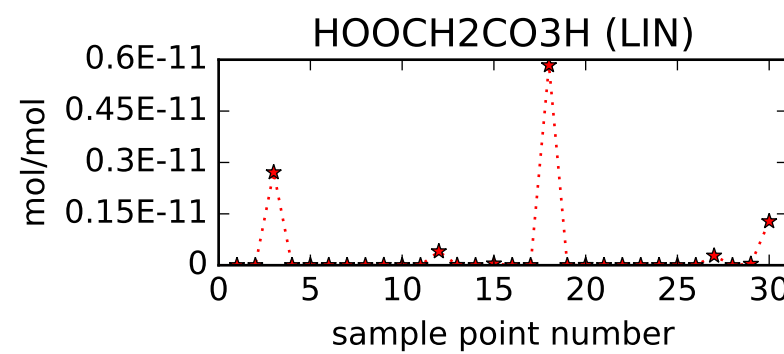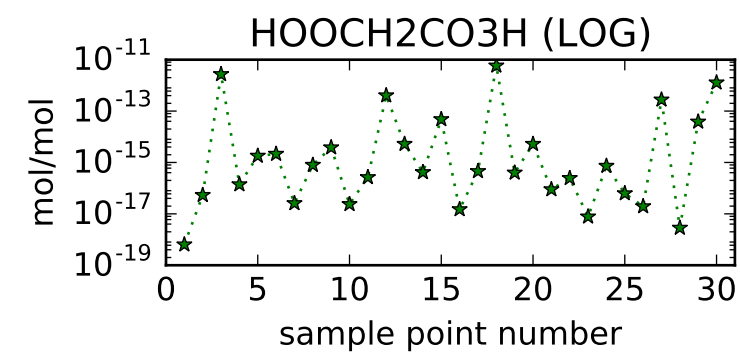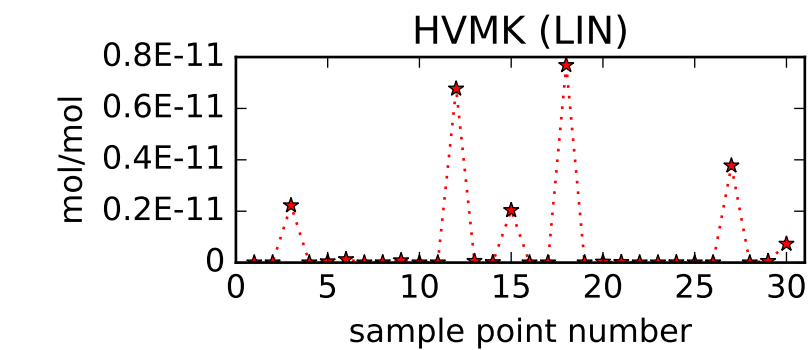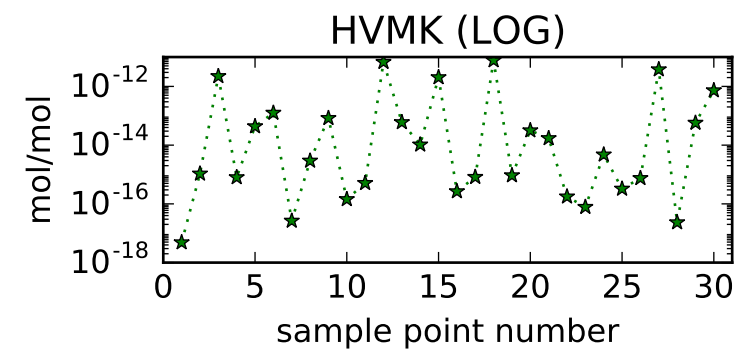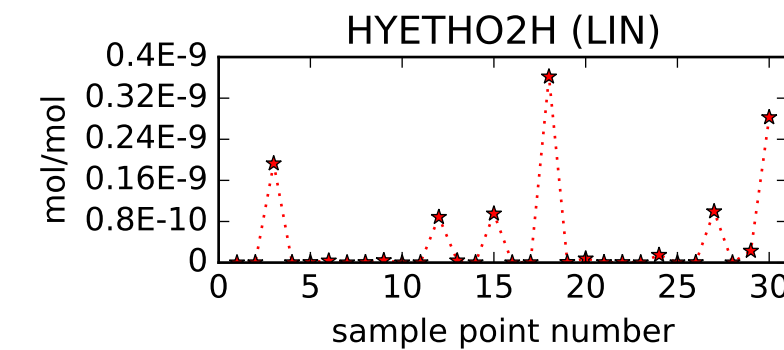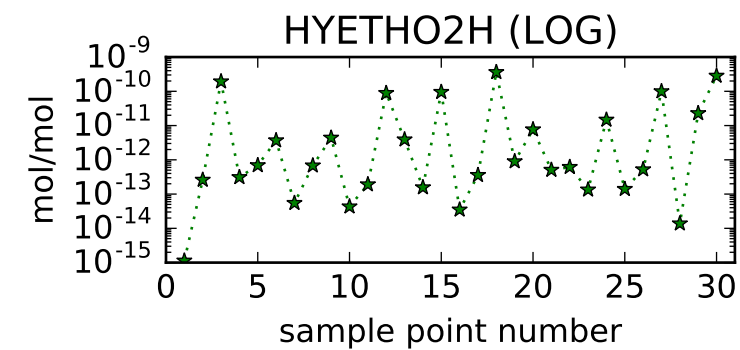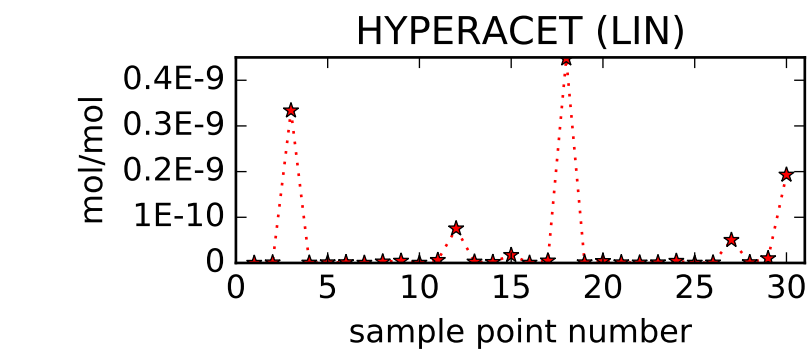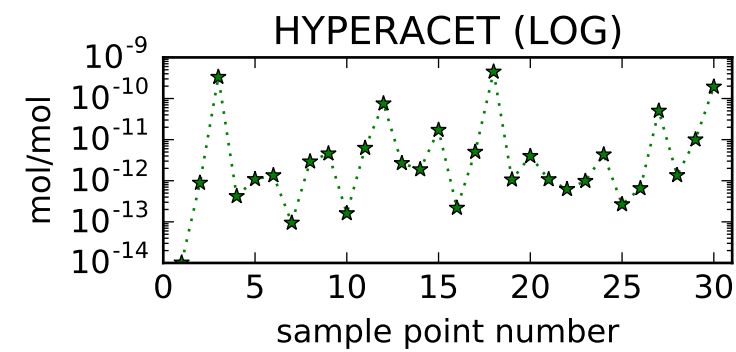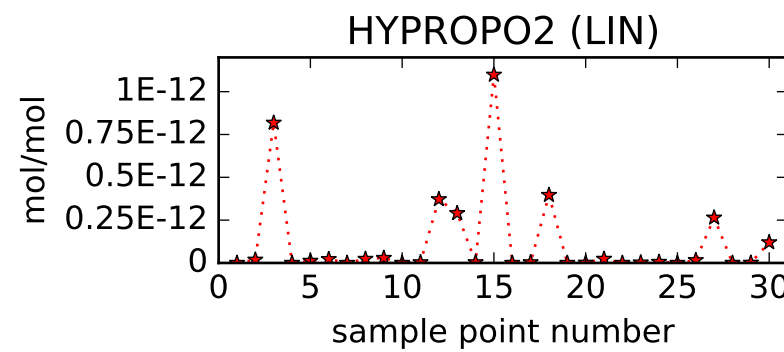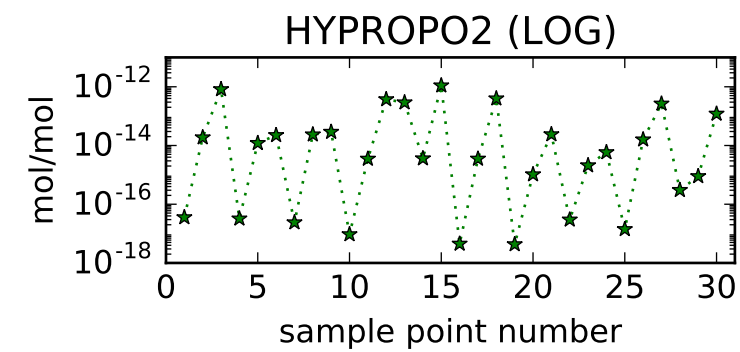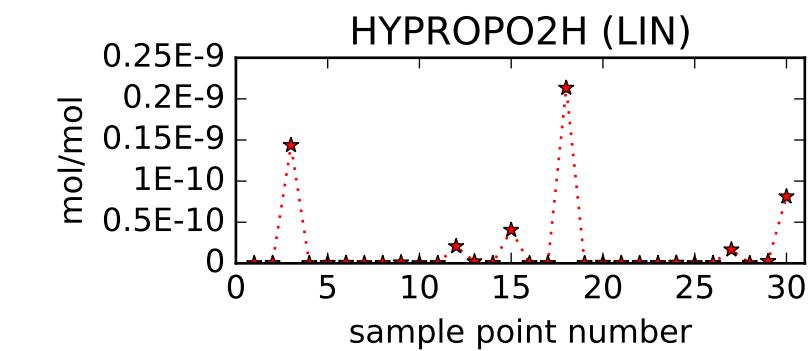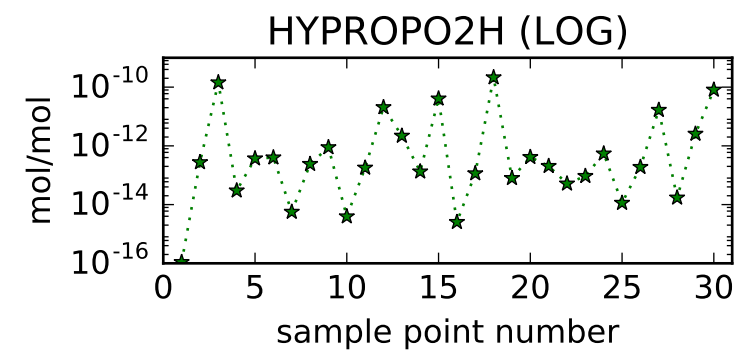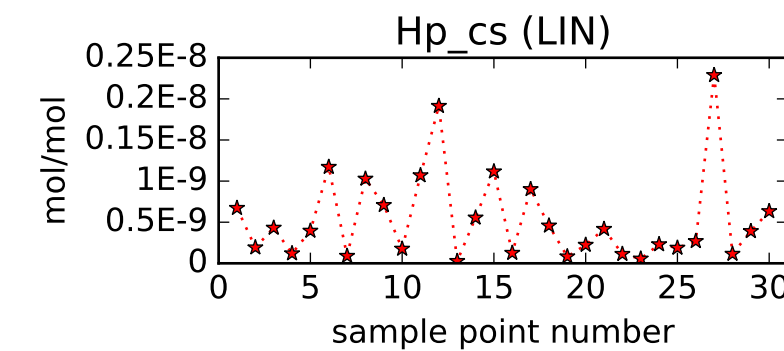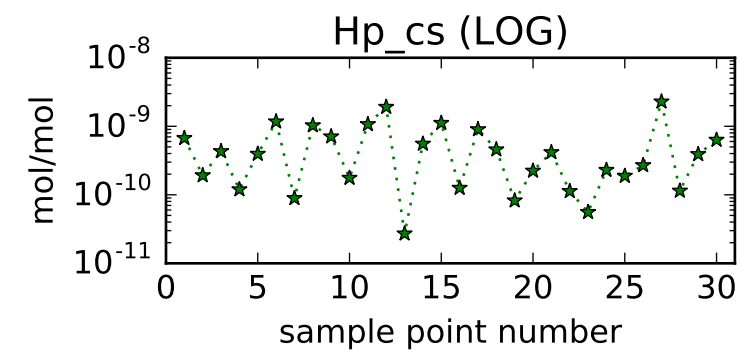



IBUTALOH (LIN)

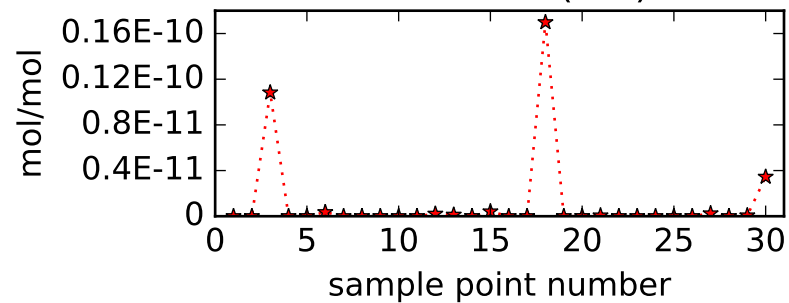

IBUTALOH (LOG)

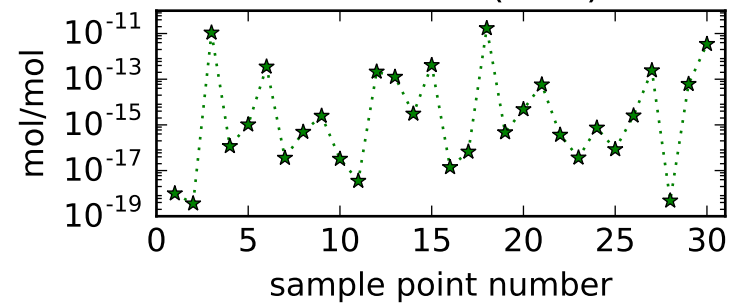

IBUTDIAL (LIN)

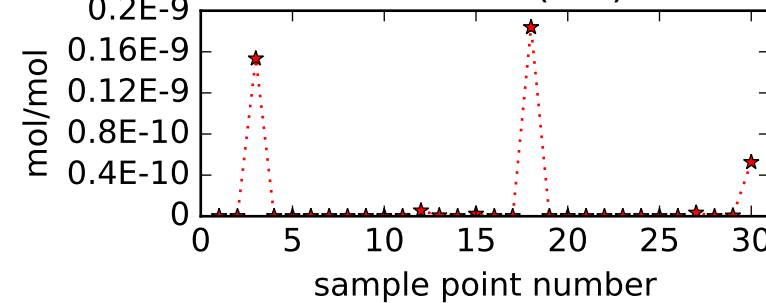

IBUTDIAL (LOG)

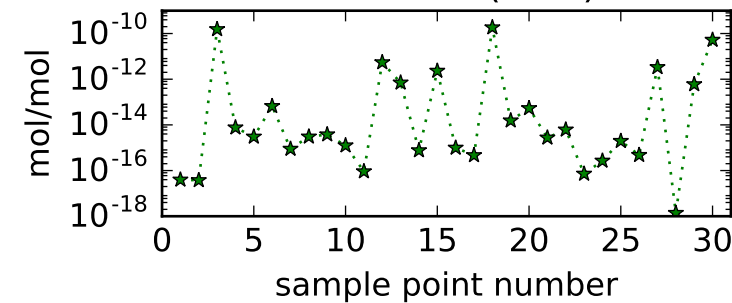

IBUTOLBNO3 (LIN)

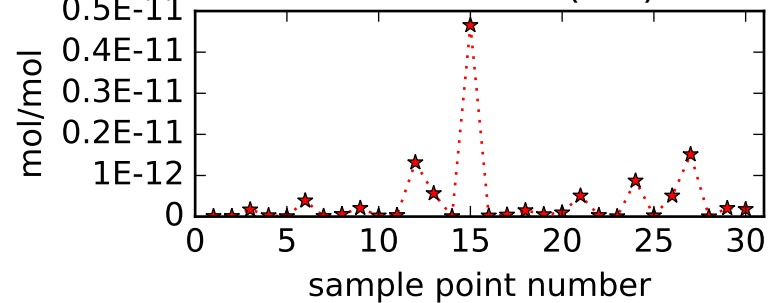

IBUTOLBNO3 (LOG)

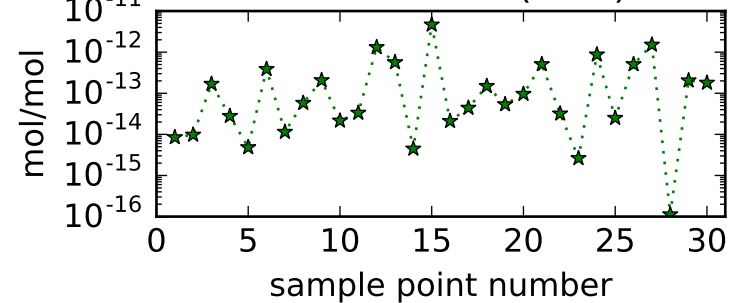

IBUTOLBO2 (LIN)

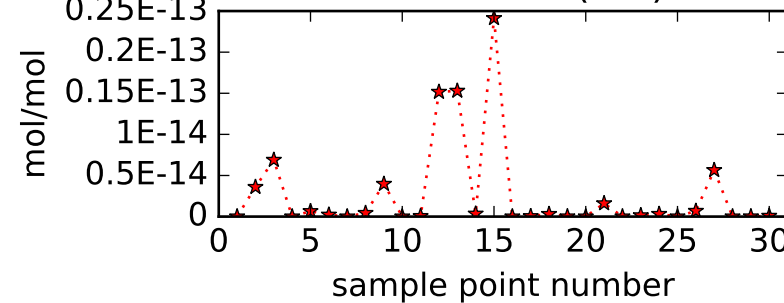

IBUTOLBO2 (LOG)

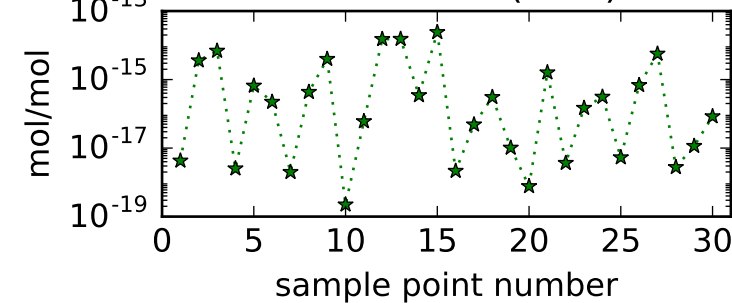

IBUTOLBOOH (LIN)

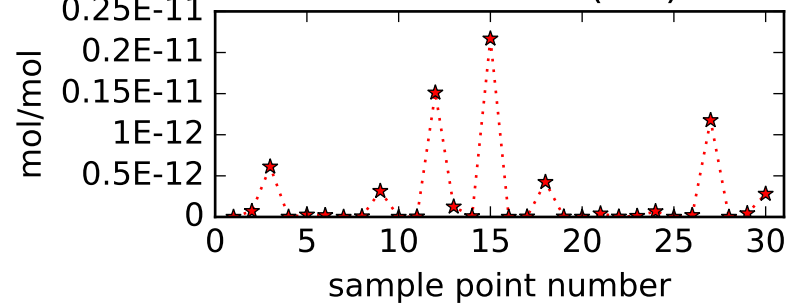

IBUTOLBOOH (LOG)

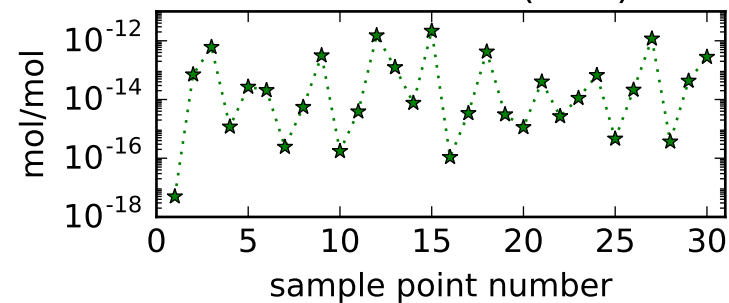

IC3H7NO3 (LIN)

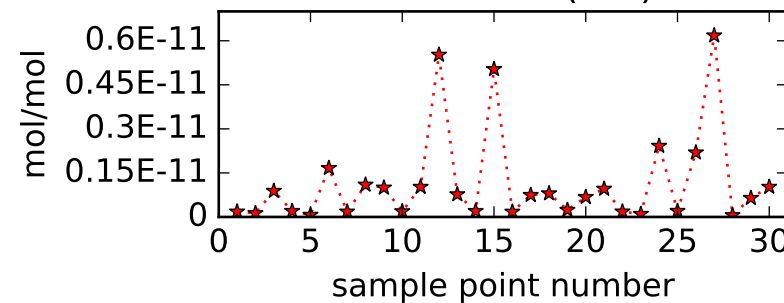

IC3H7NO3 (LOG)

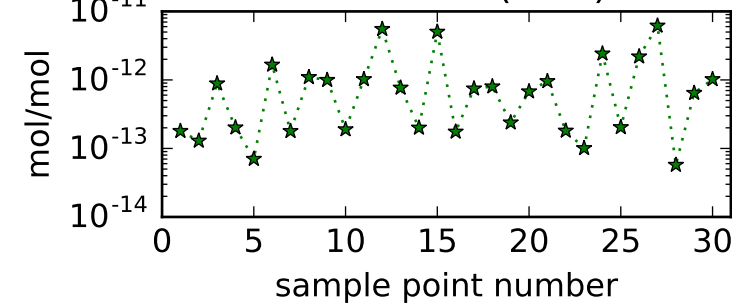

IC3H7O2 (LIN)

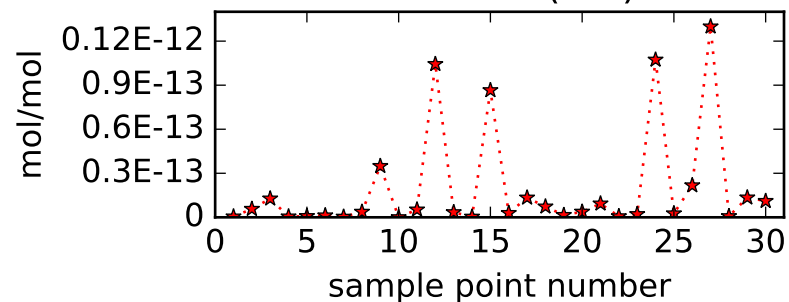

IC3H7O2 (LOG)

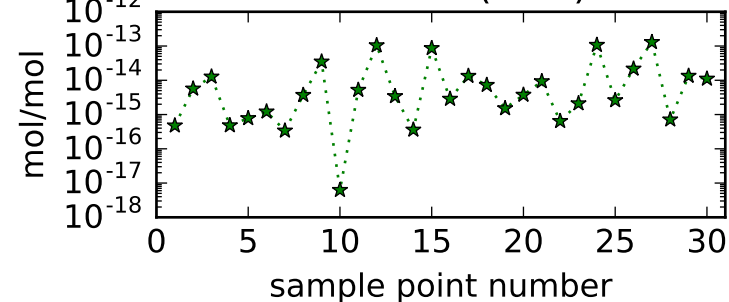

IC3H7OOH (LIN)

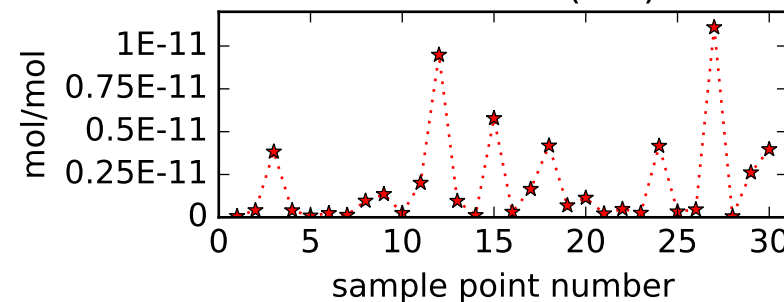

IC3H7OOH (LOG)

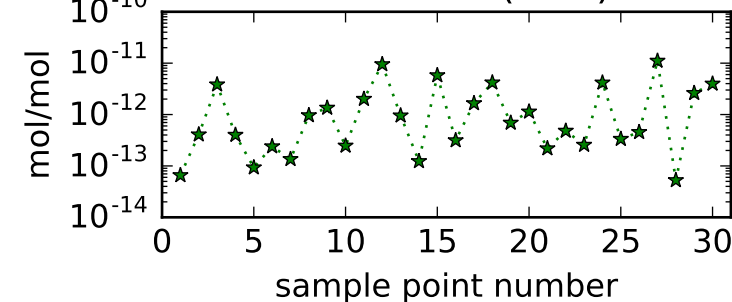

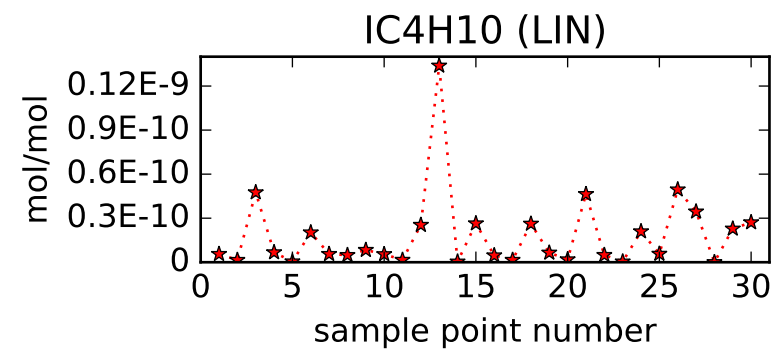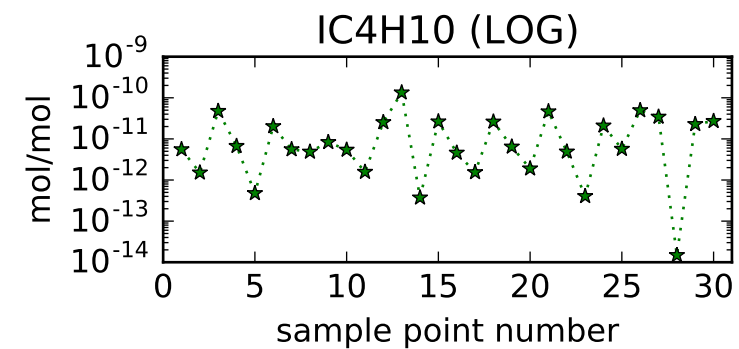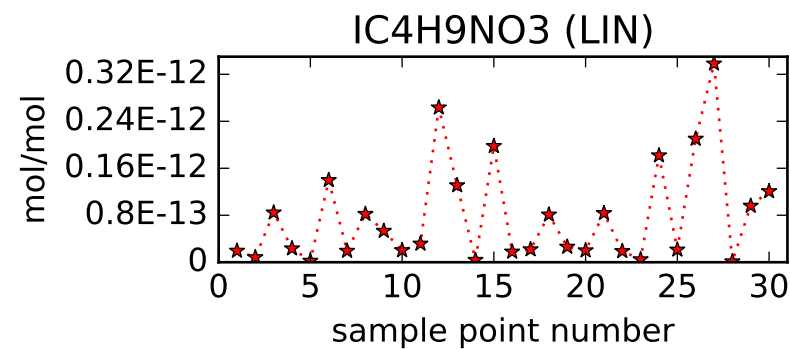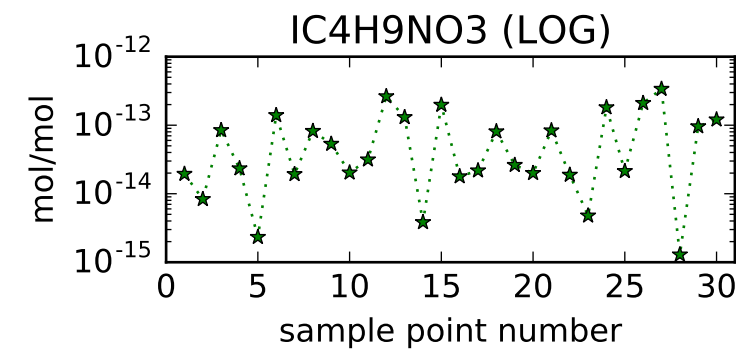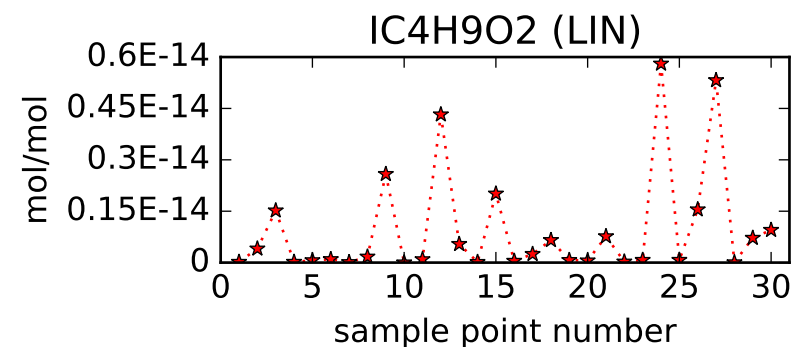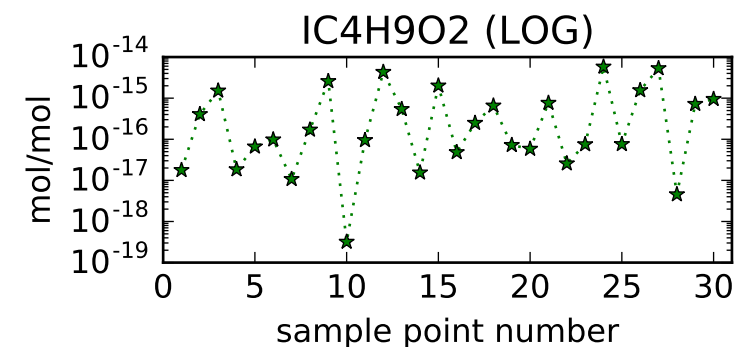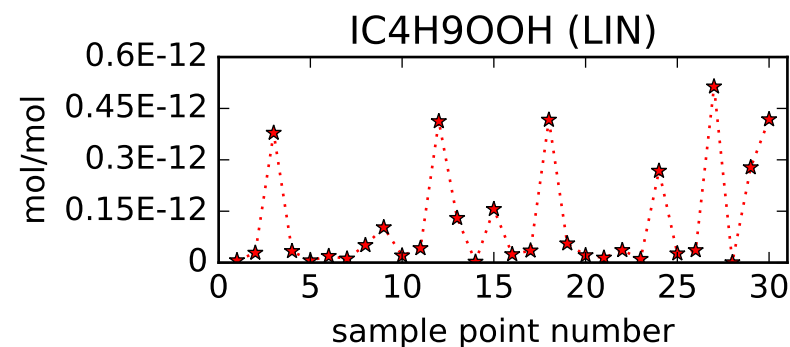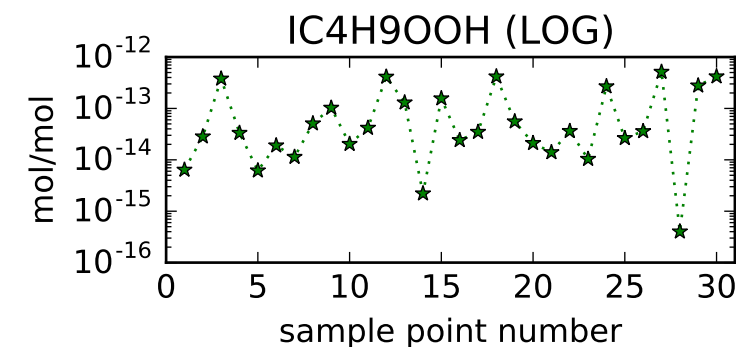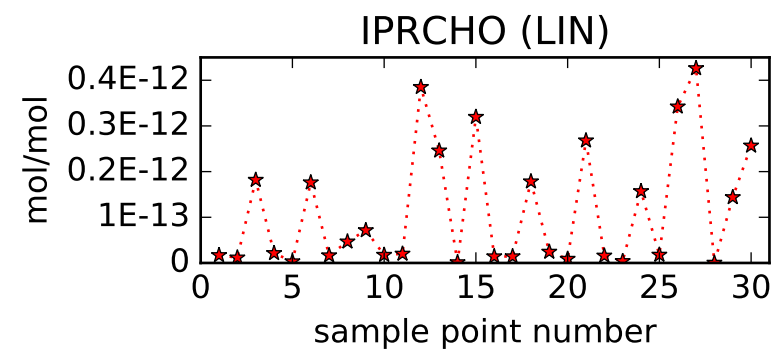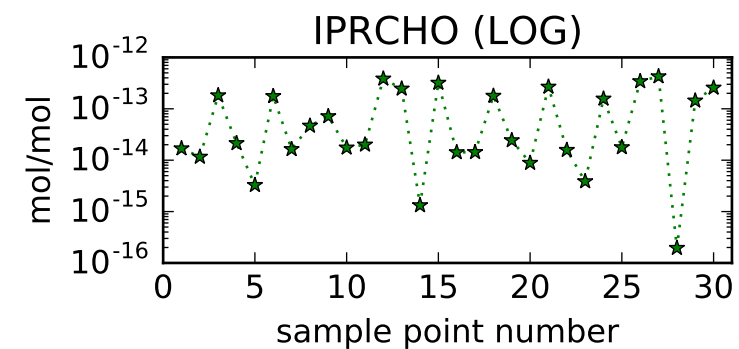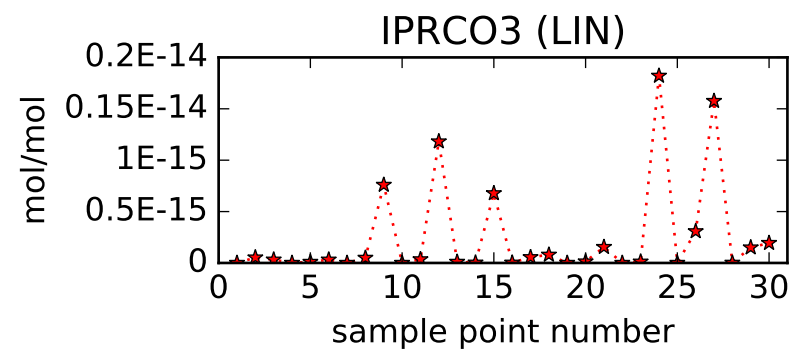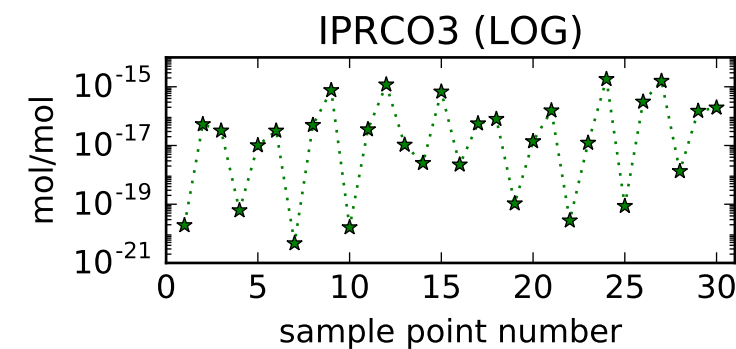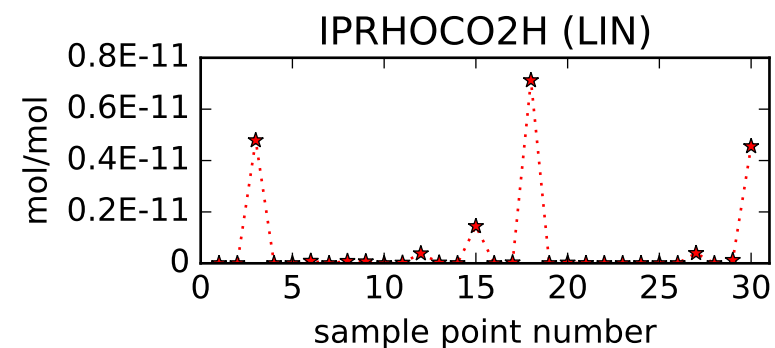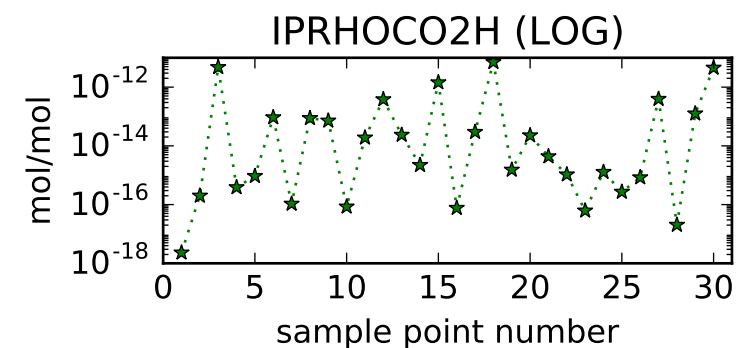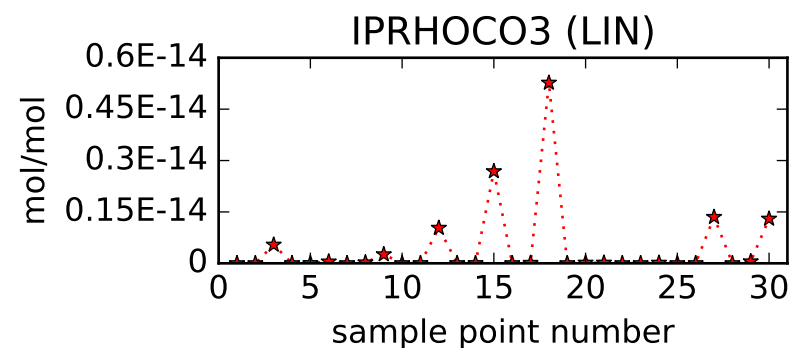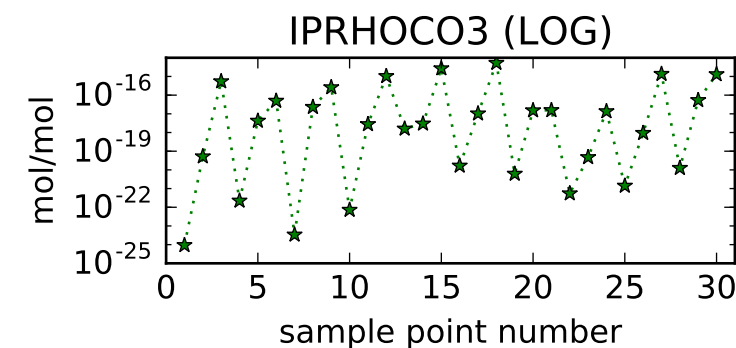

IPRHOCO3H (LIN)

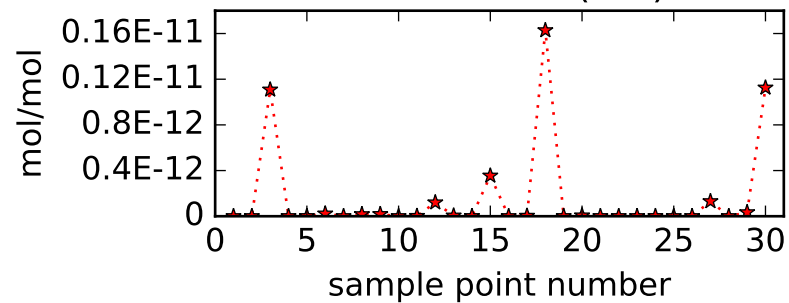

IPRHOCO3H (LOG)

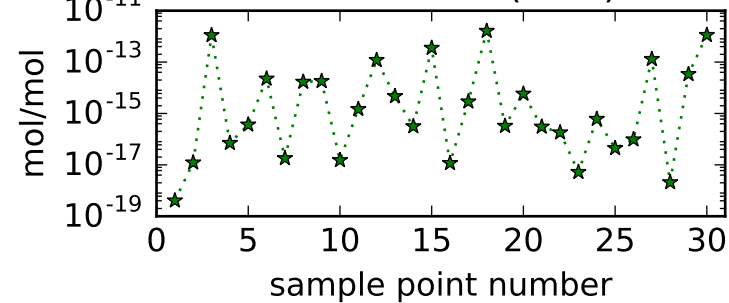

IPROPOL (LIN)

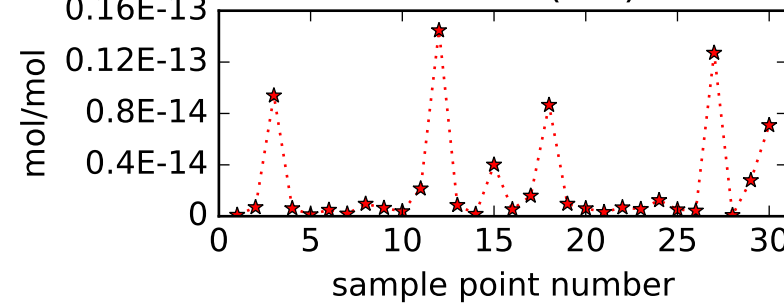

IPROPOL (LOG)

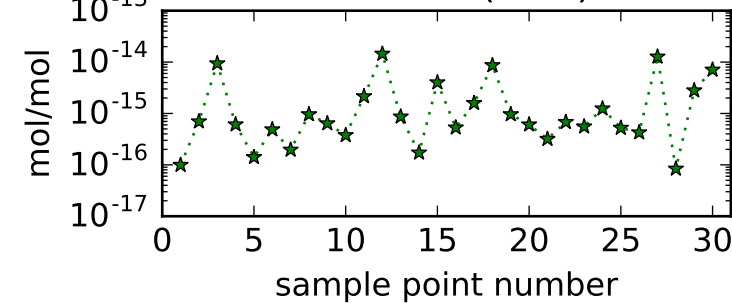

ISOPAB (LIN)

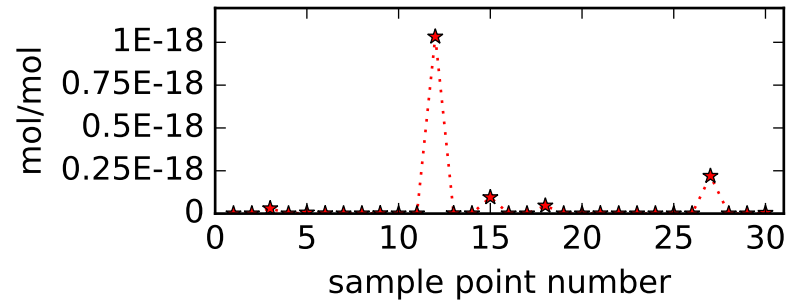

ISOPAB (LOG)

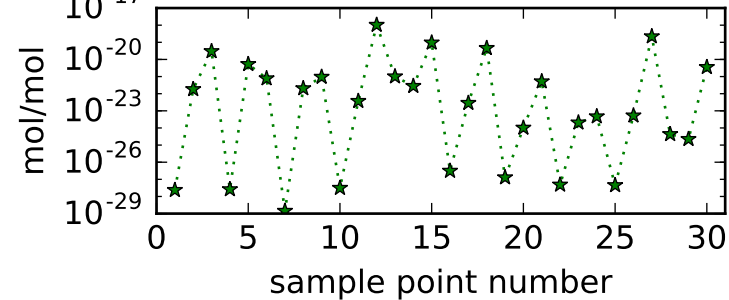

ISOPAHOH (LIN)

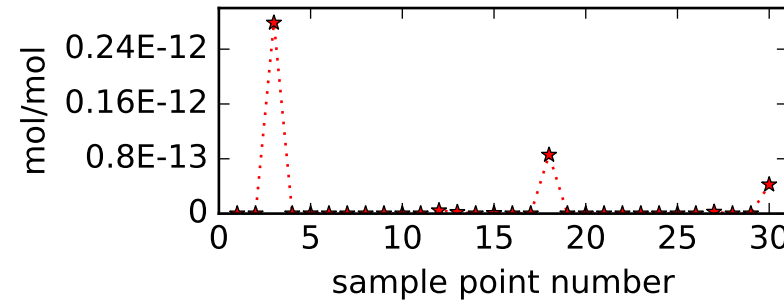

ISOPAHOH (LOG)

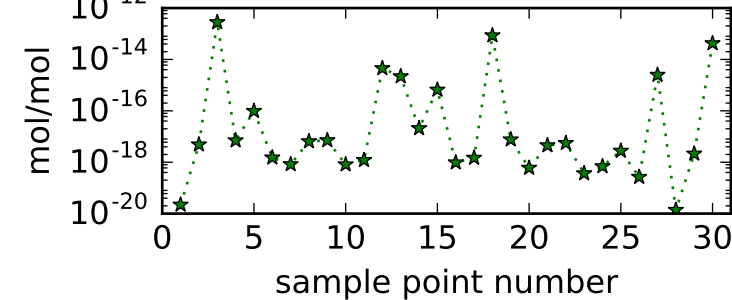

ISOPBDNO3O2 (LIN)

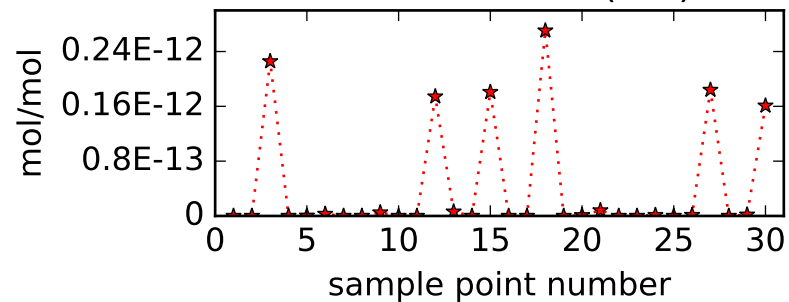

ISOPBDNO3O2 (LOG)

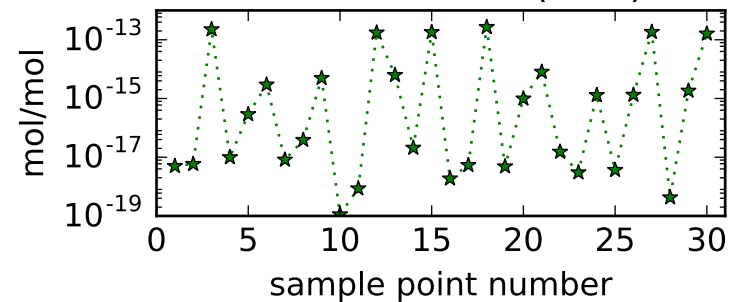

ISOPBNO3 (LIN)

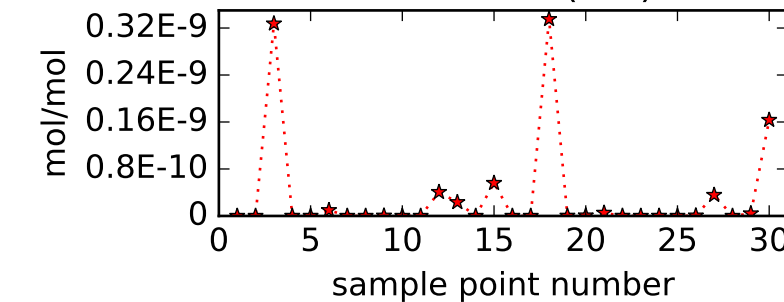

ISOPBNO3 (LOG)

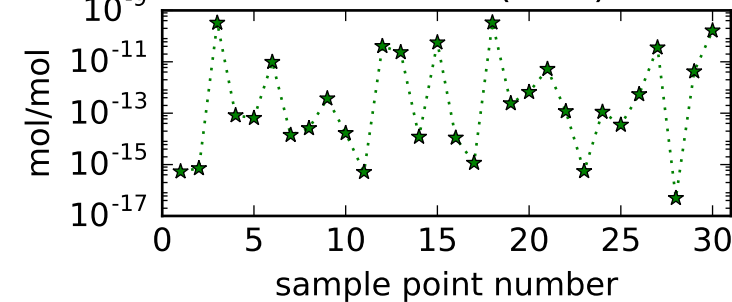

ISOPBO2 (LIN)

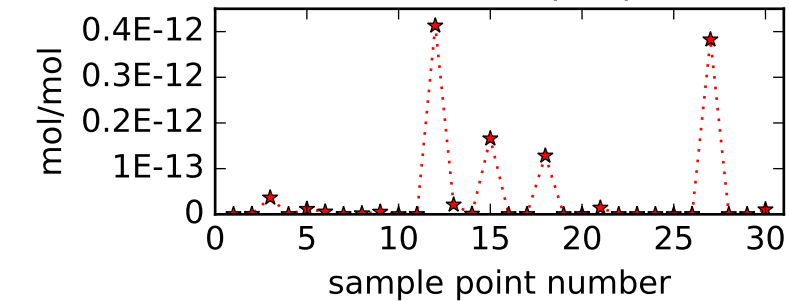

ISOPBO2 (LOG)

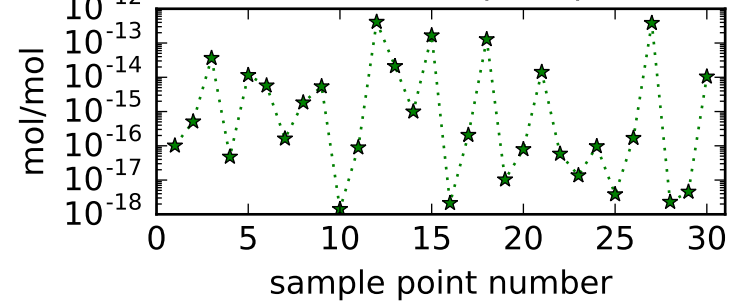

ISOPBOH (LIN)

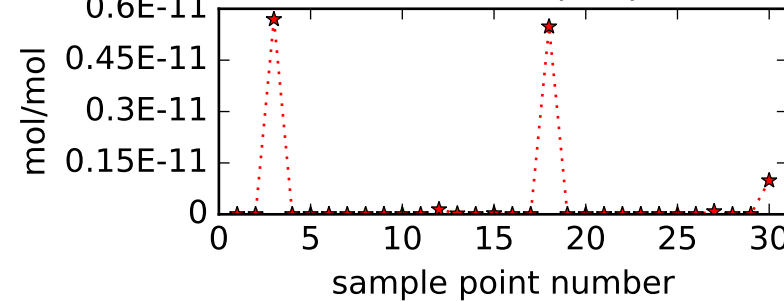

ISOPBOH (LOG)

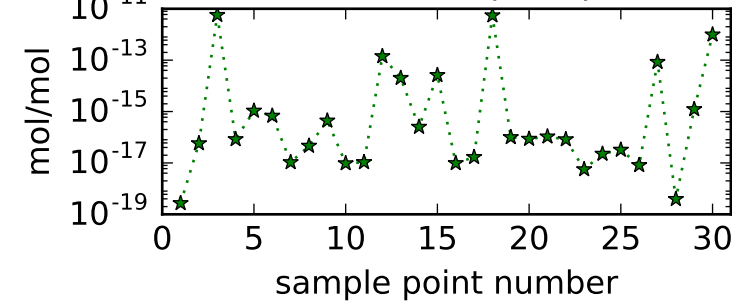

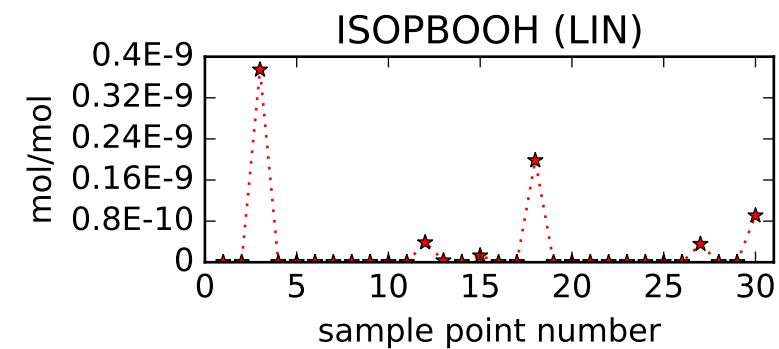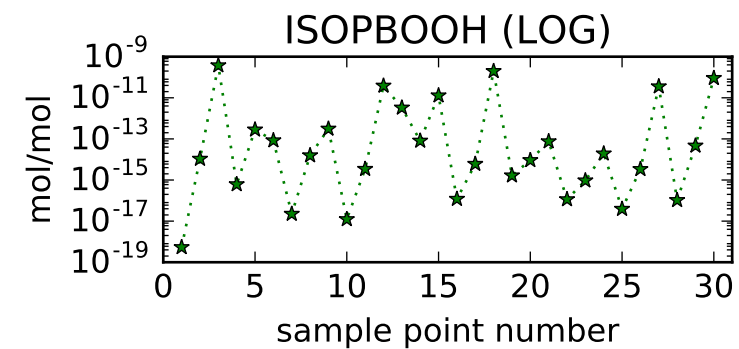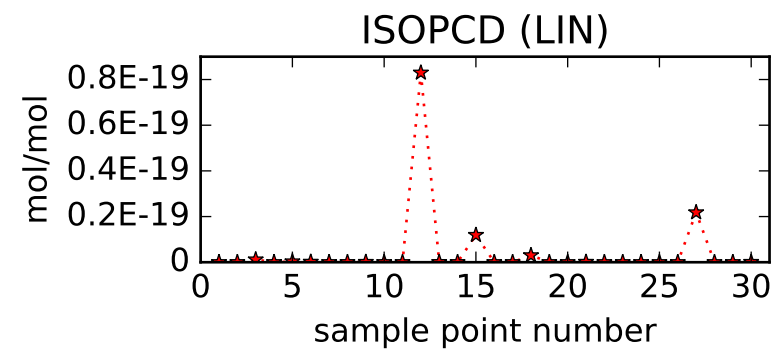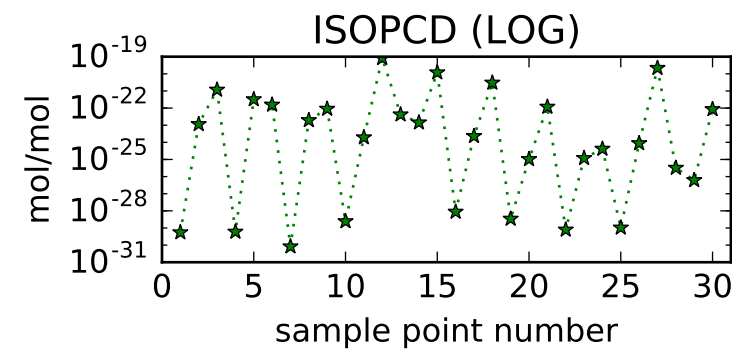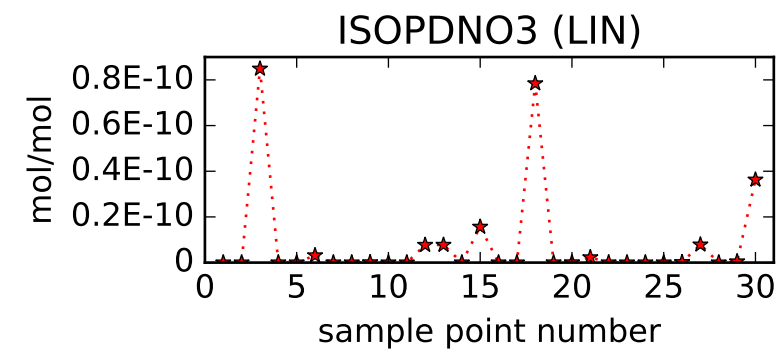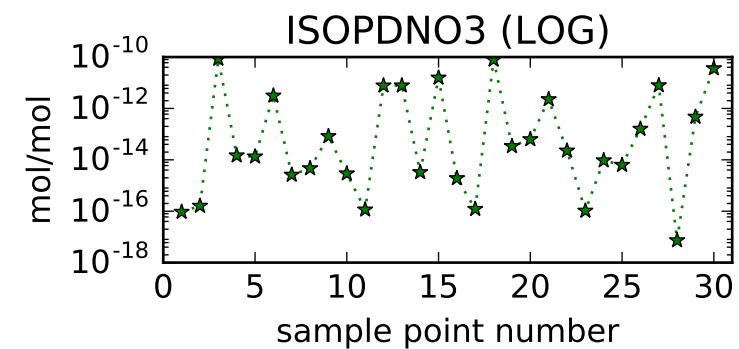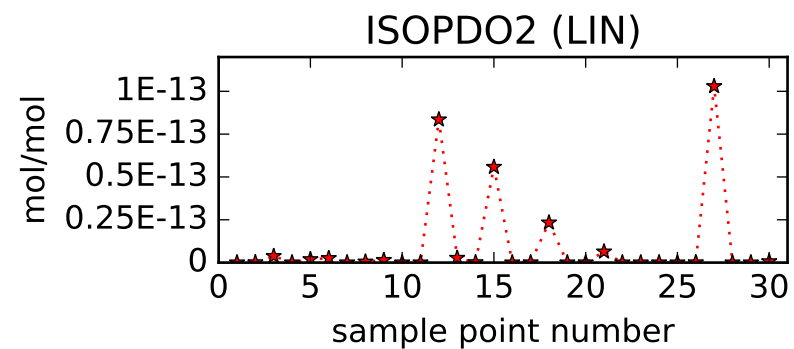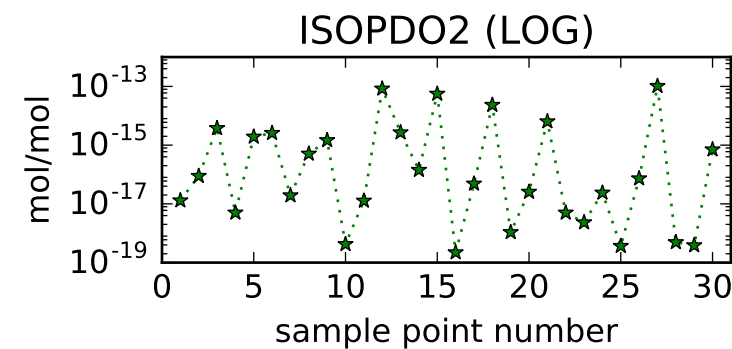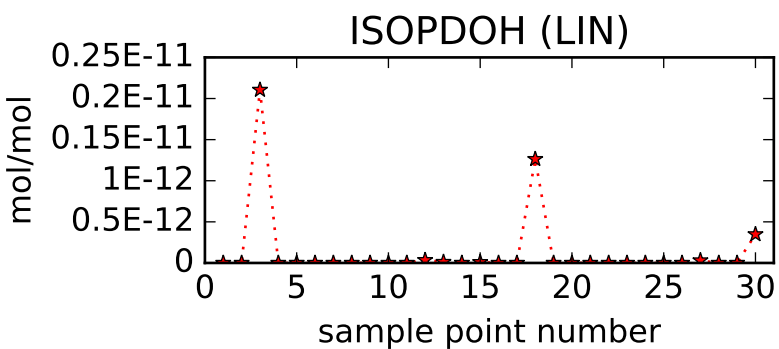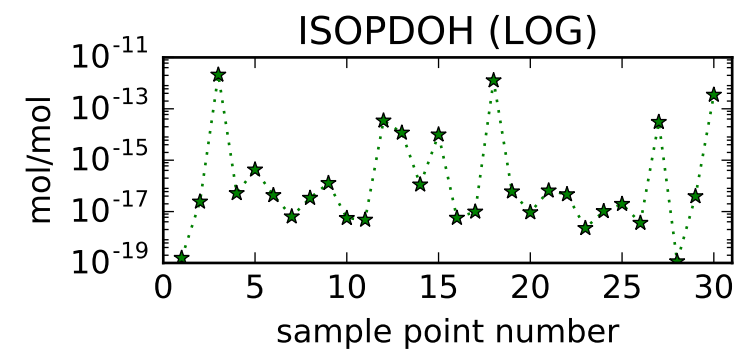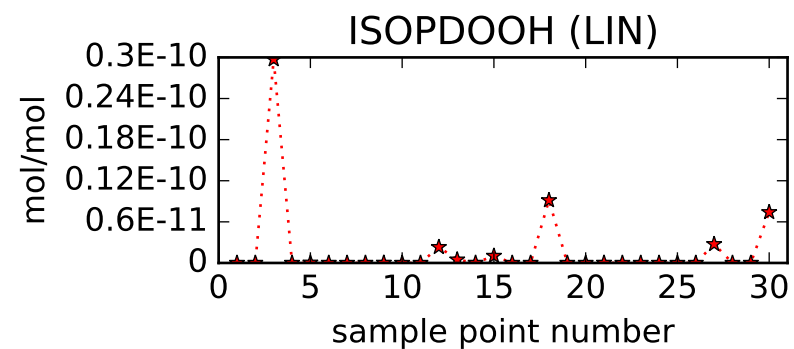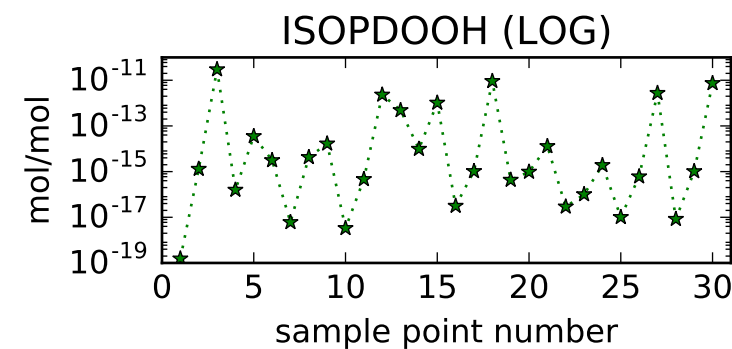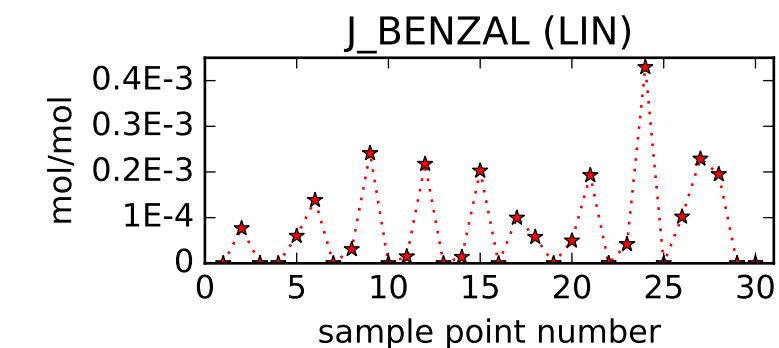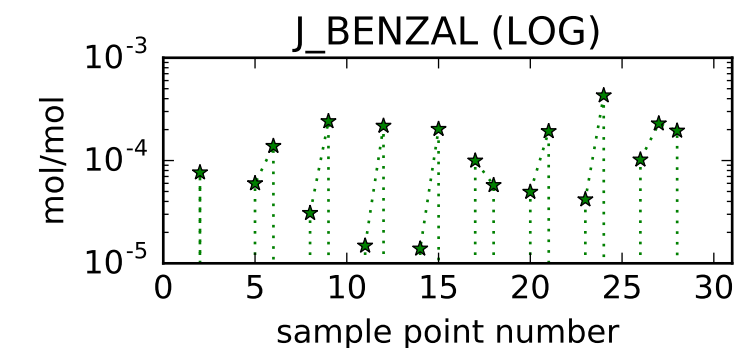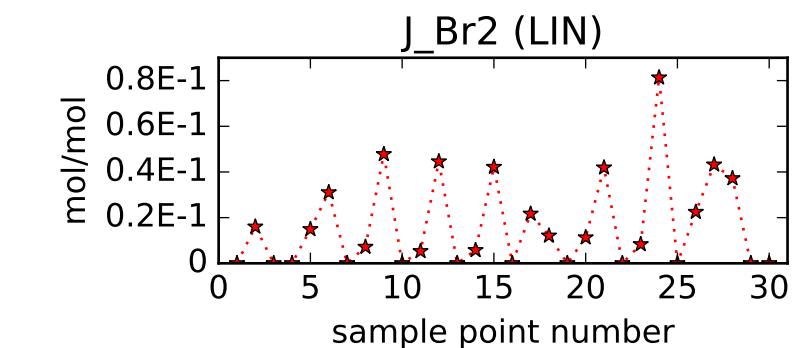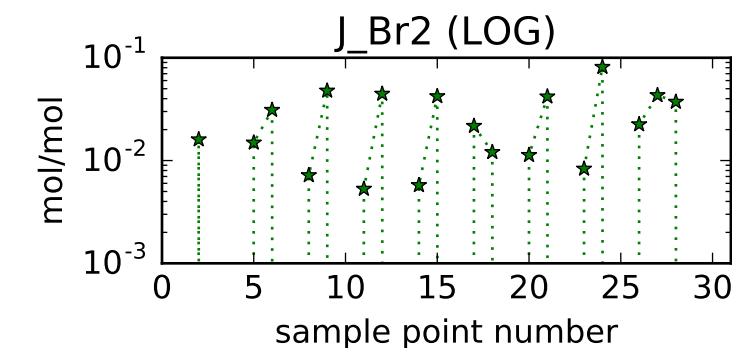

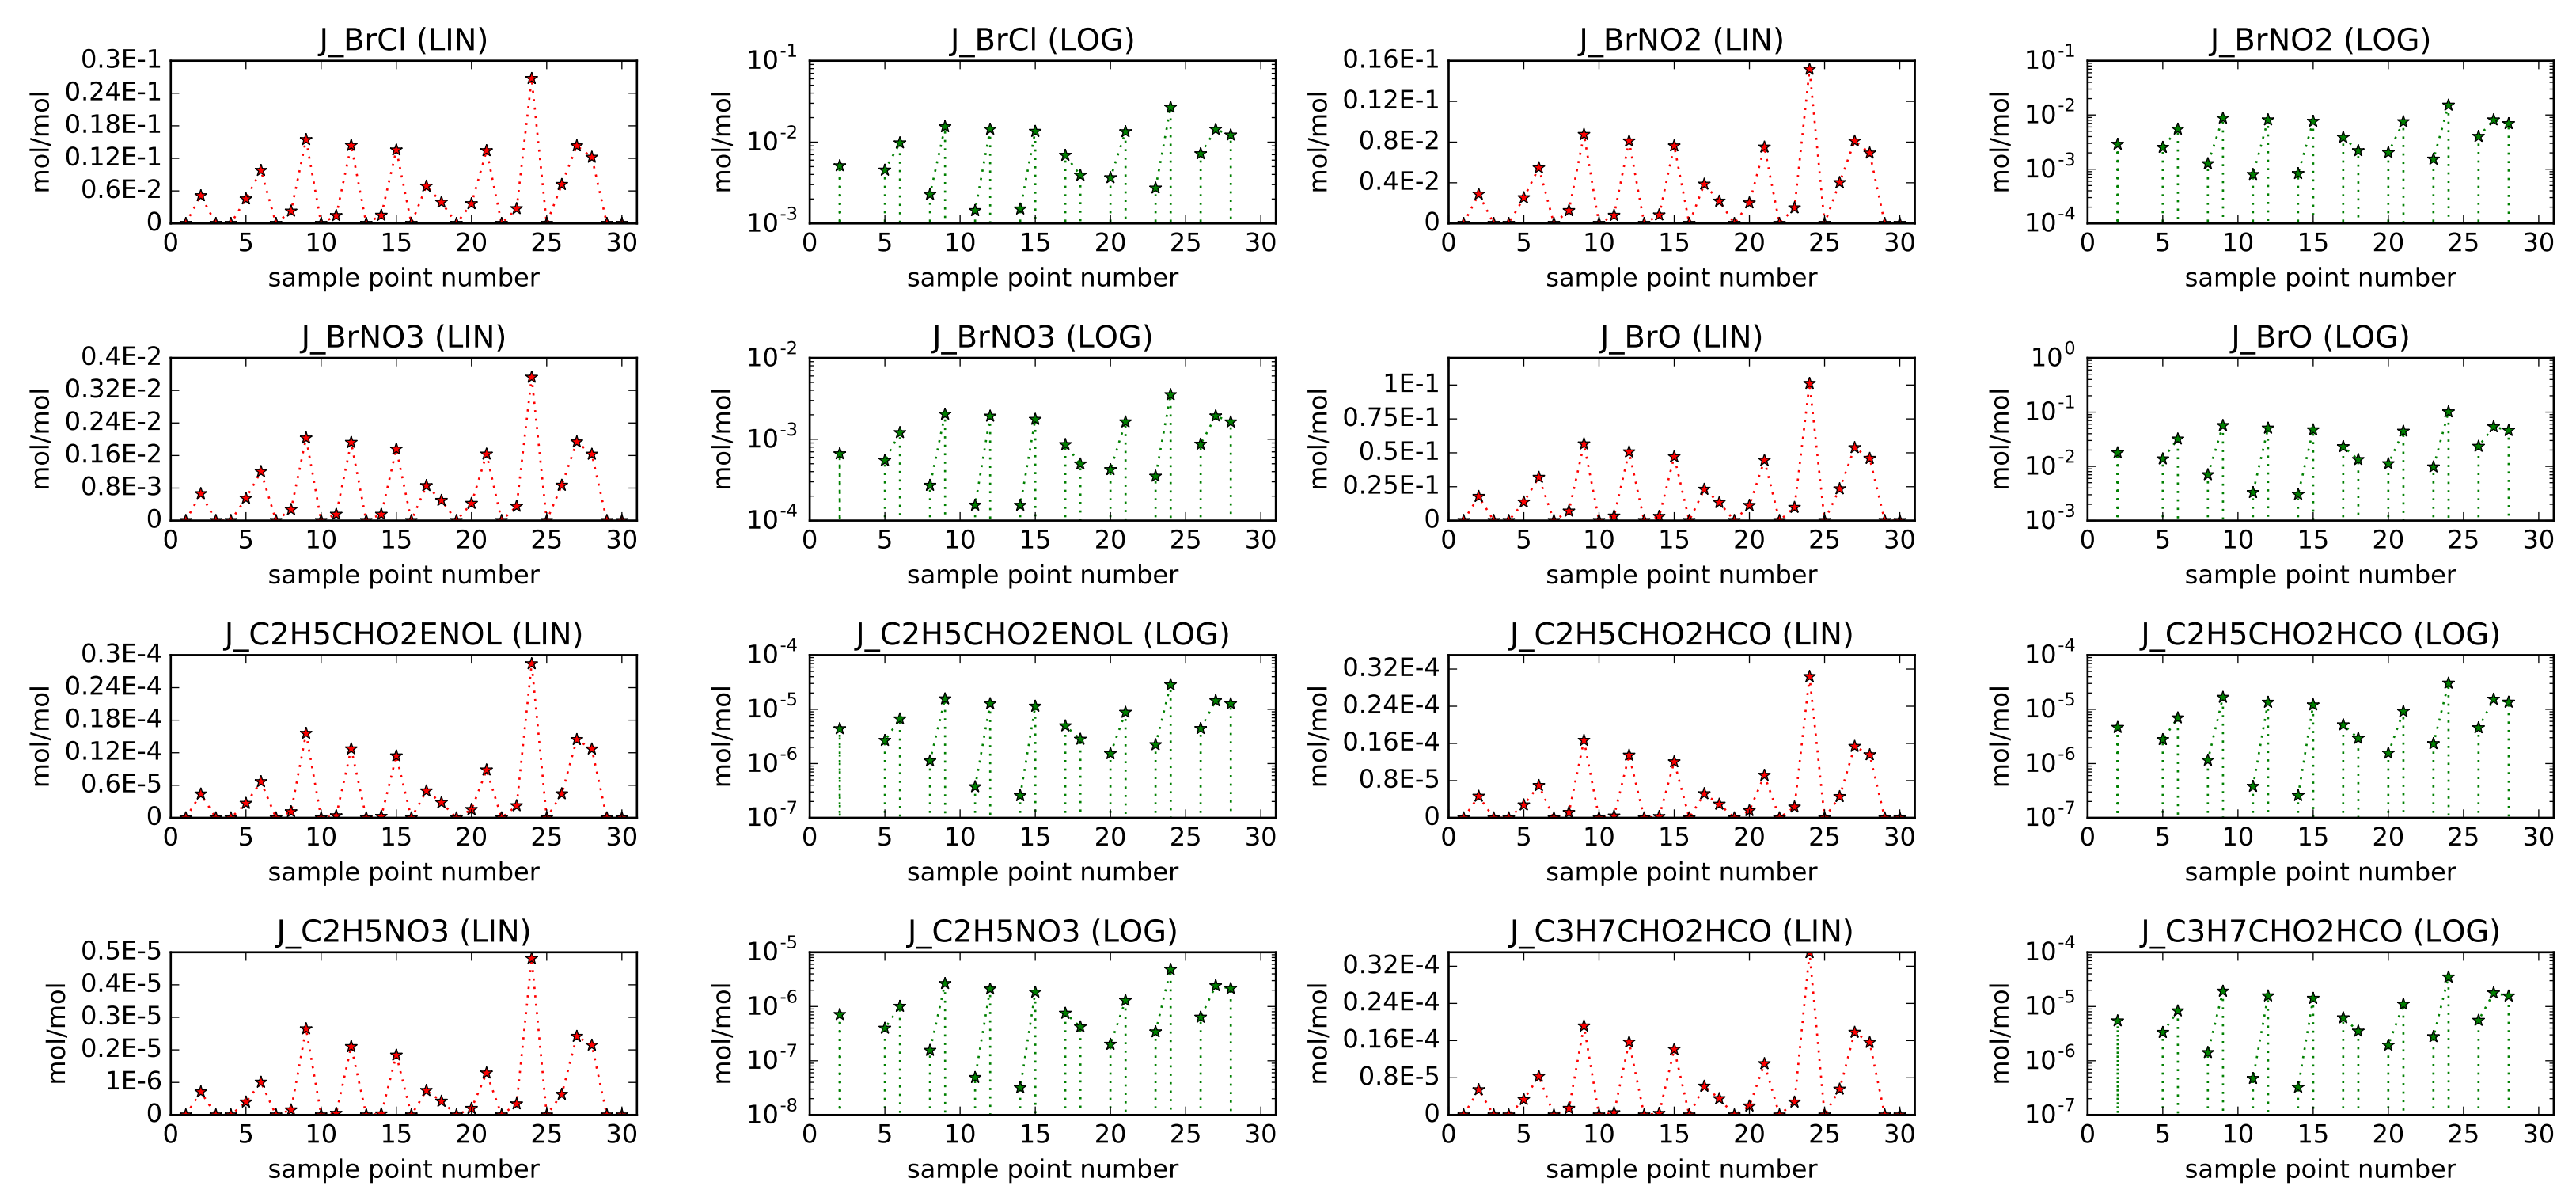



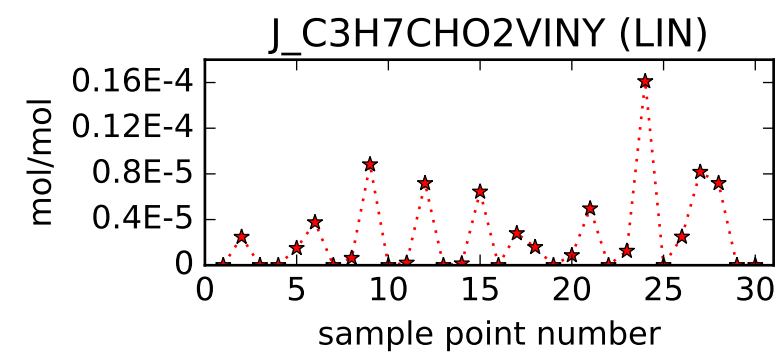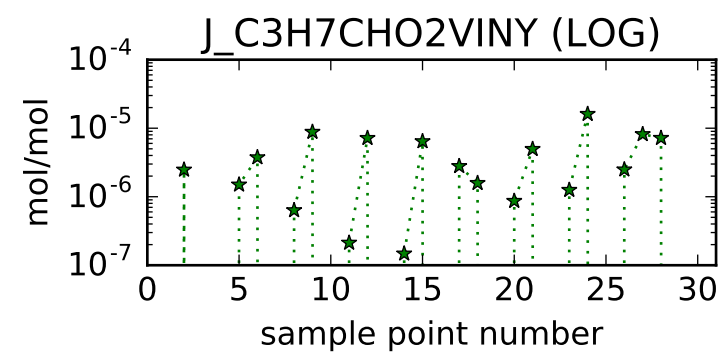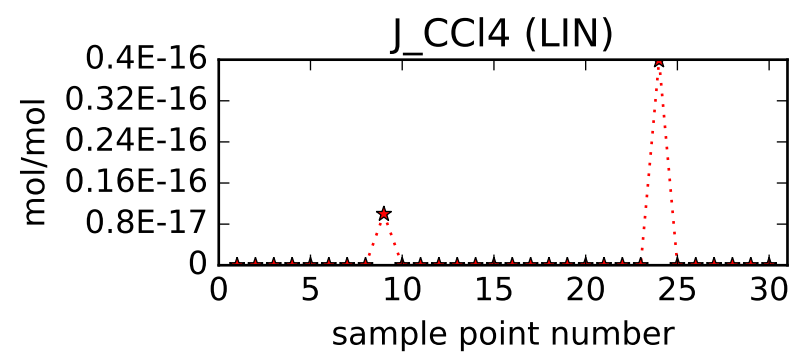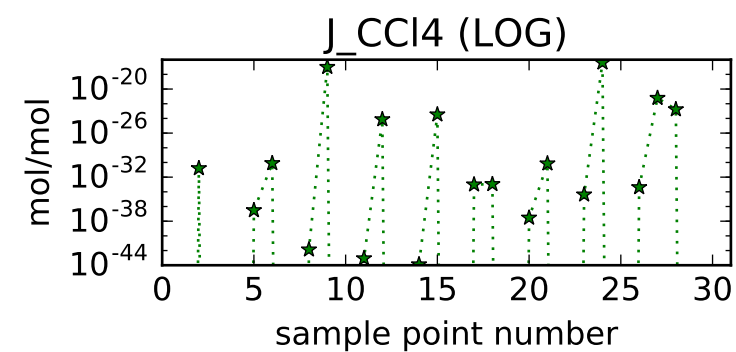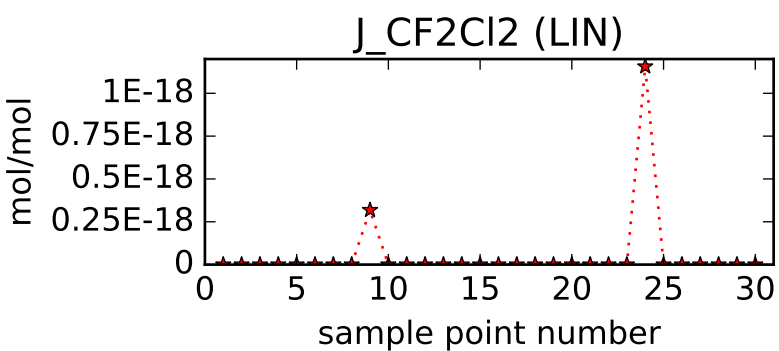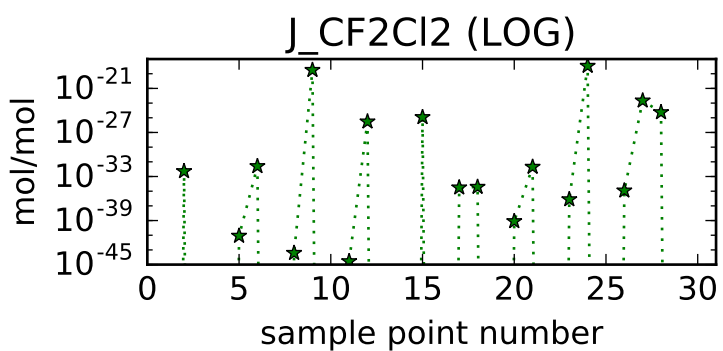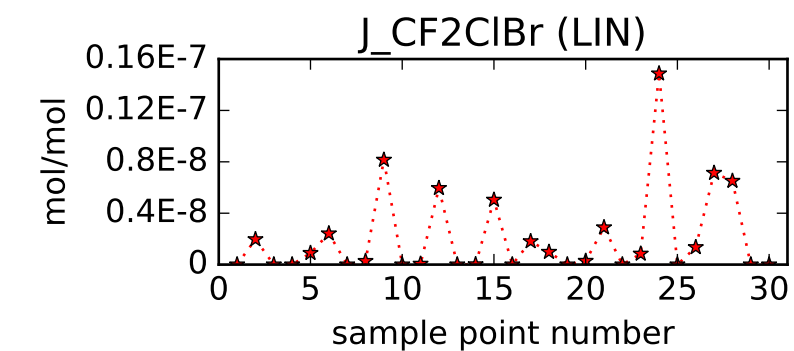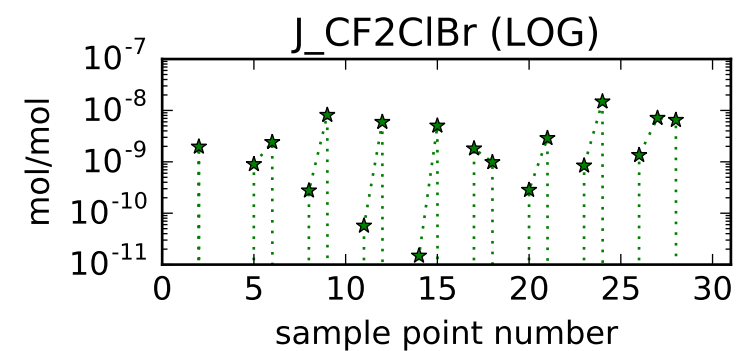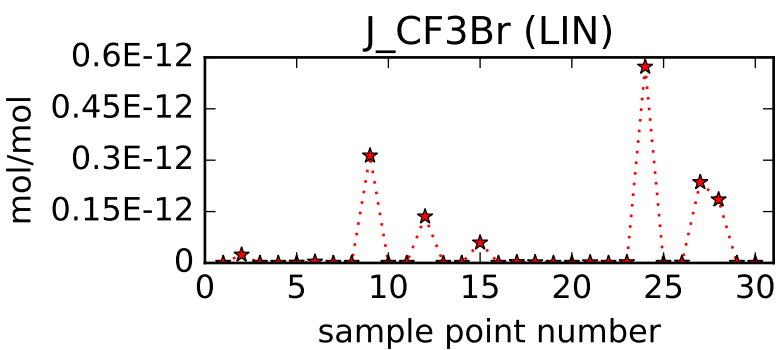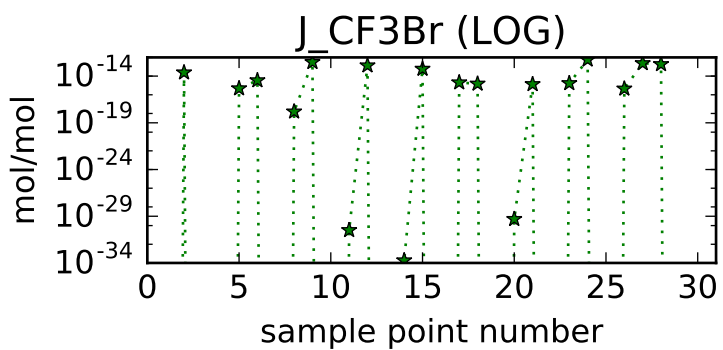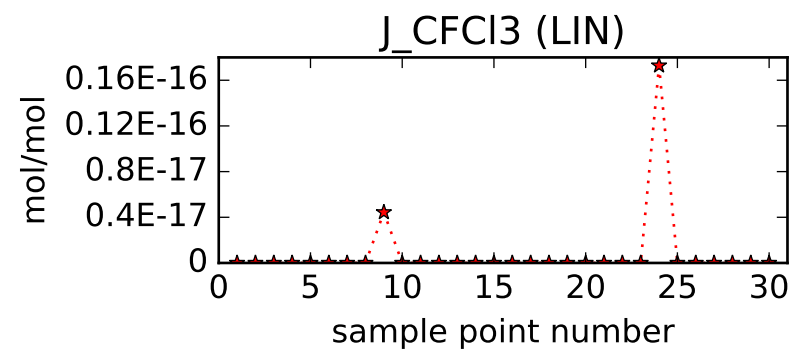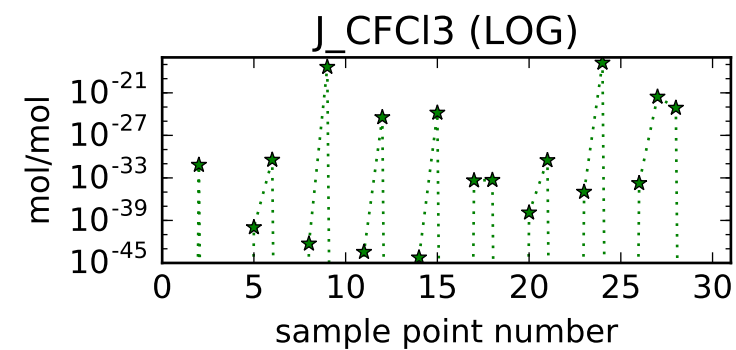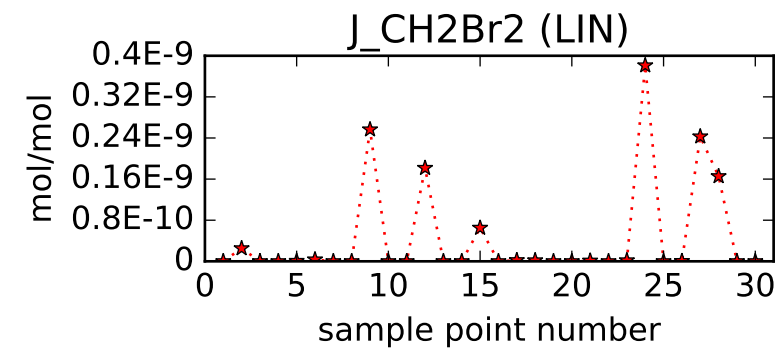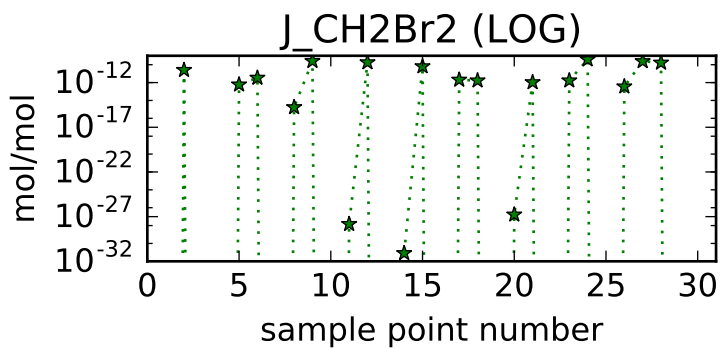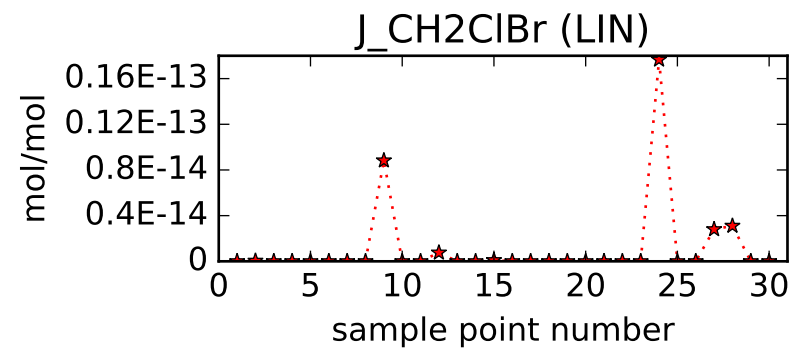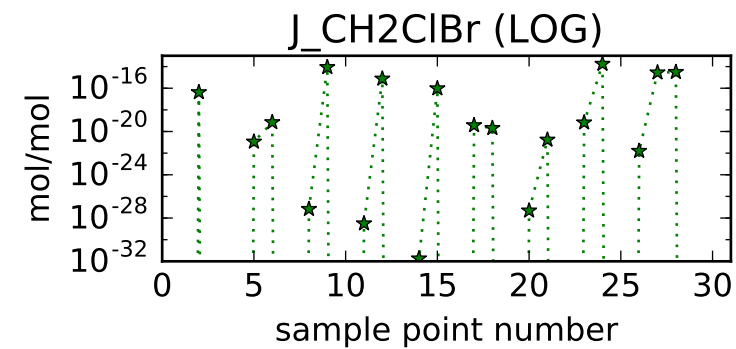

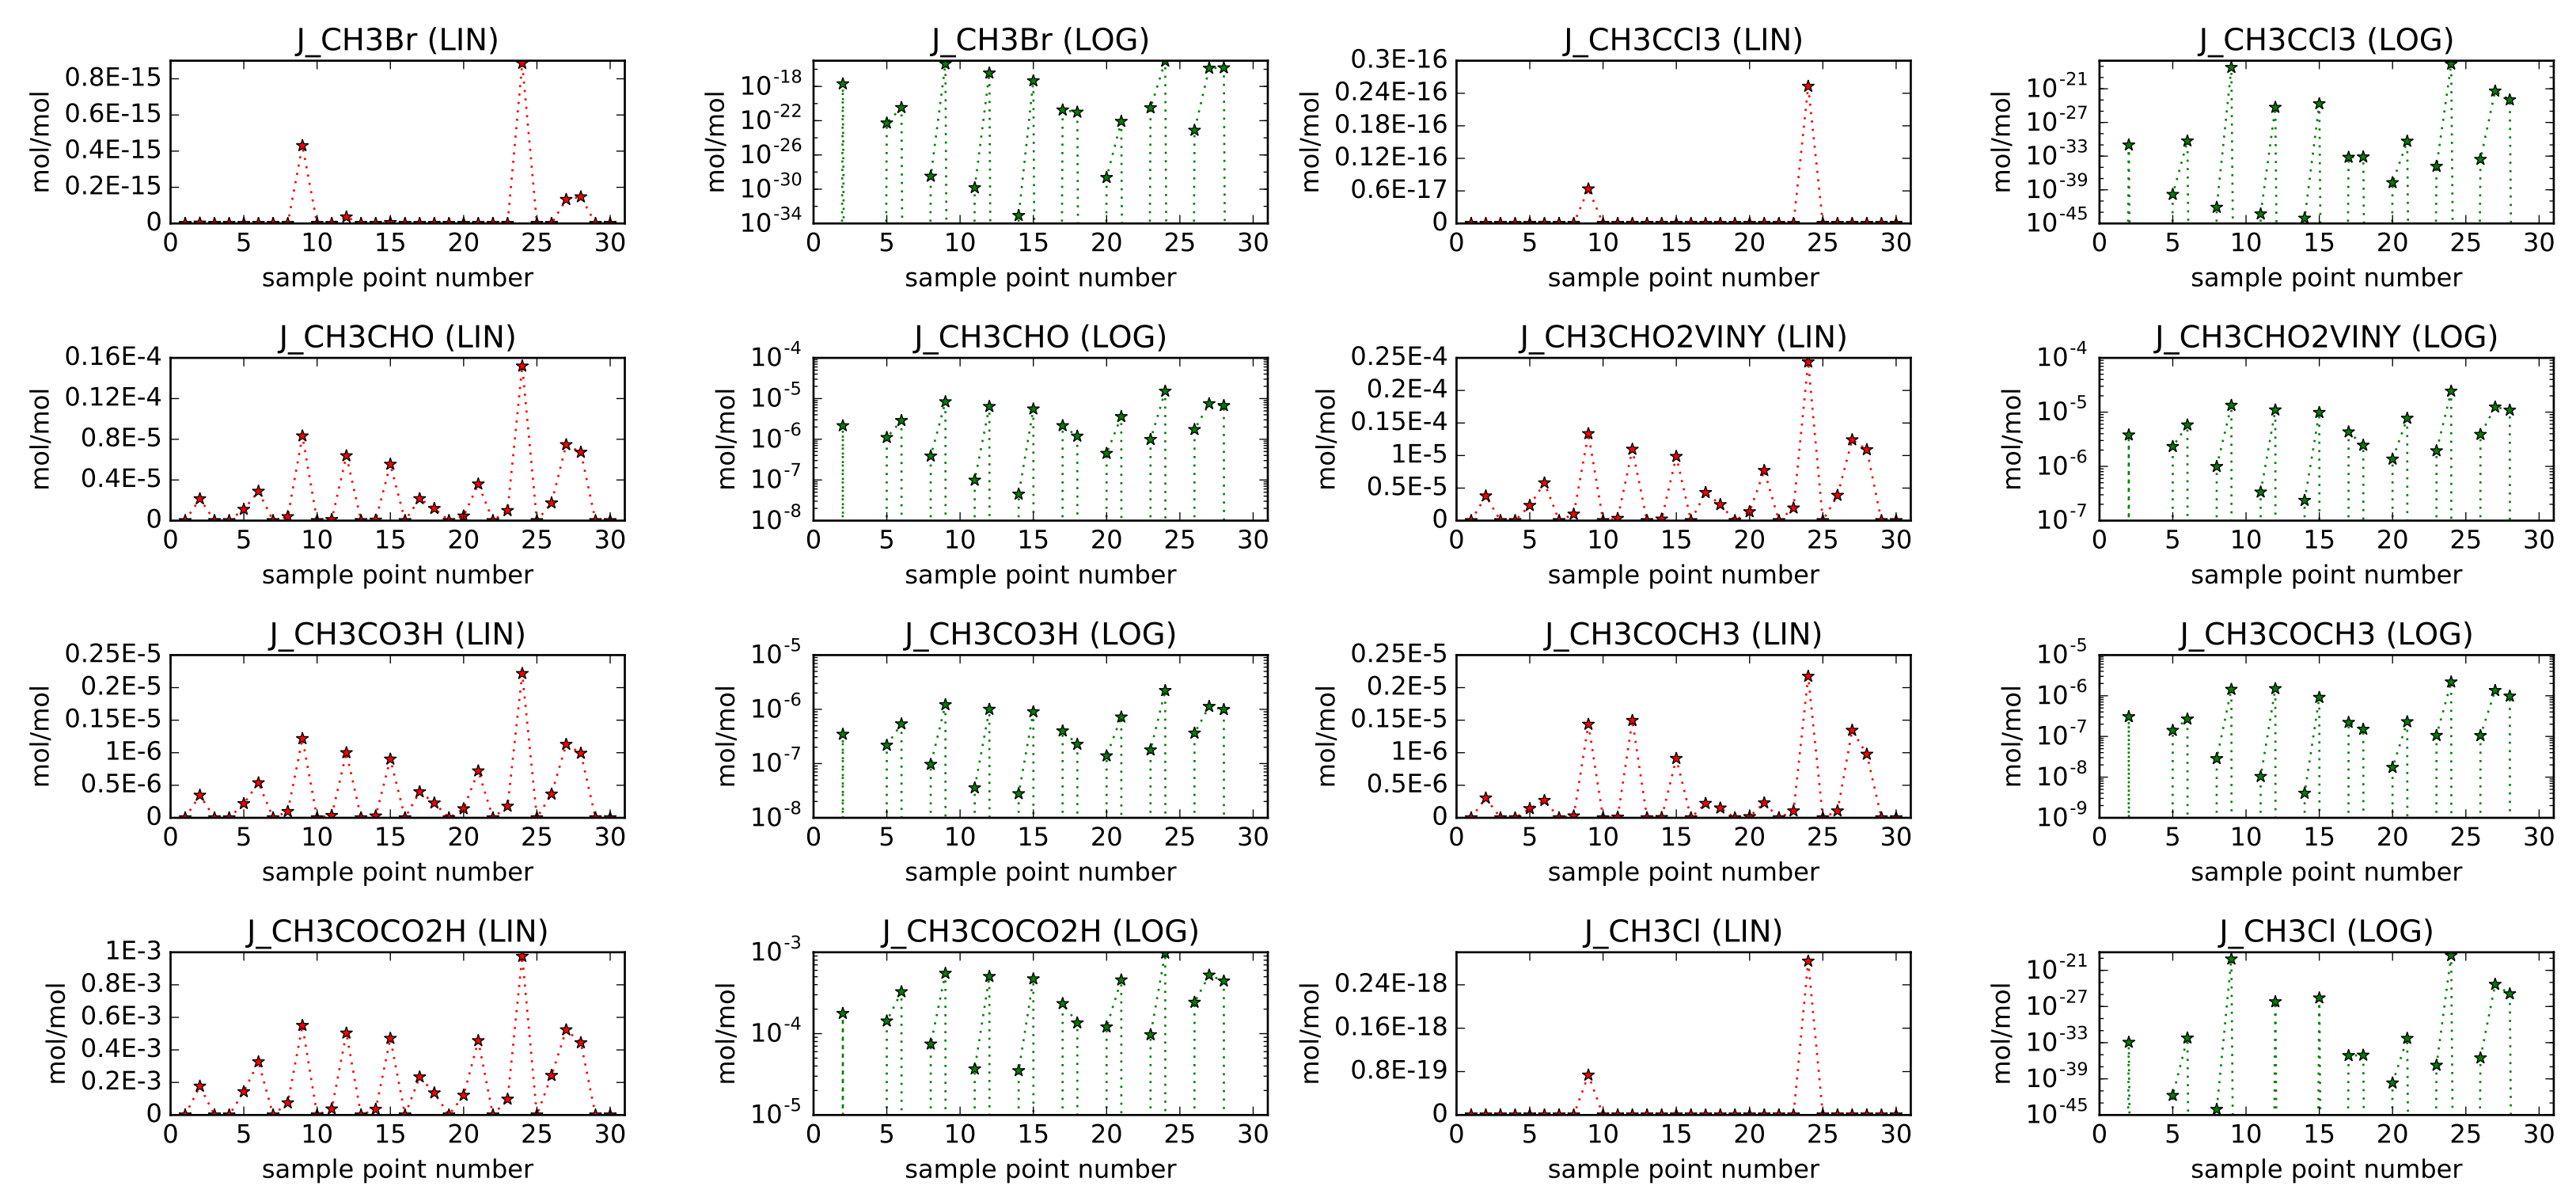

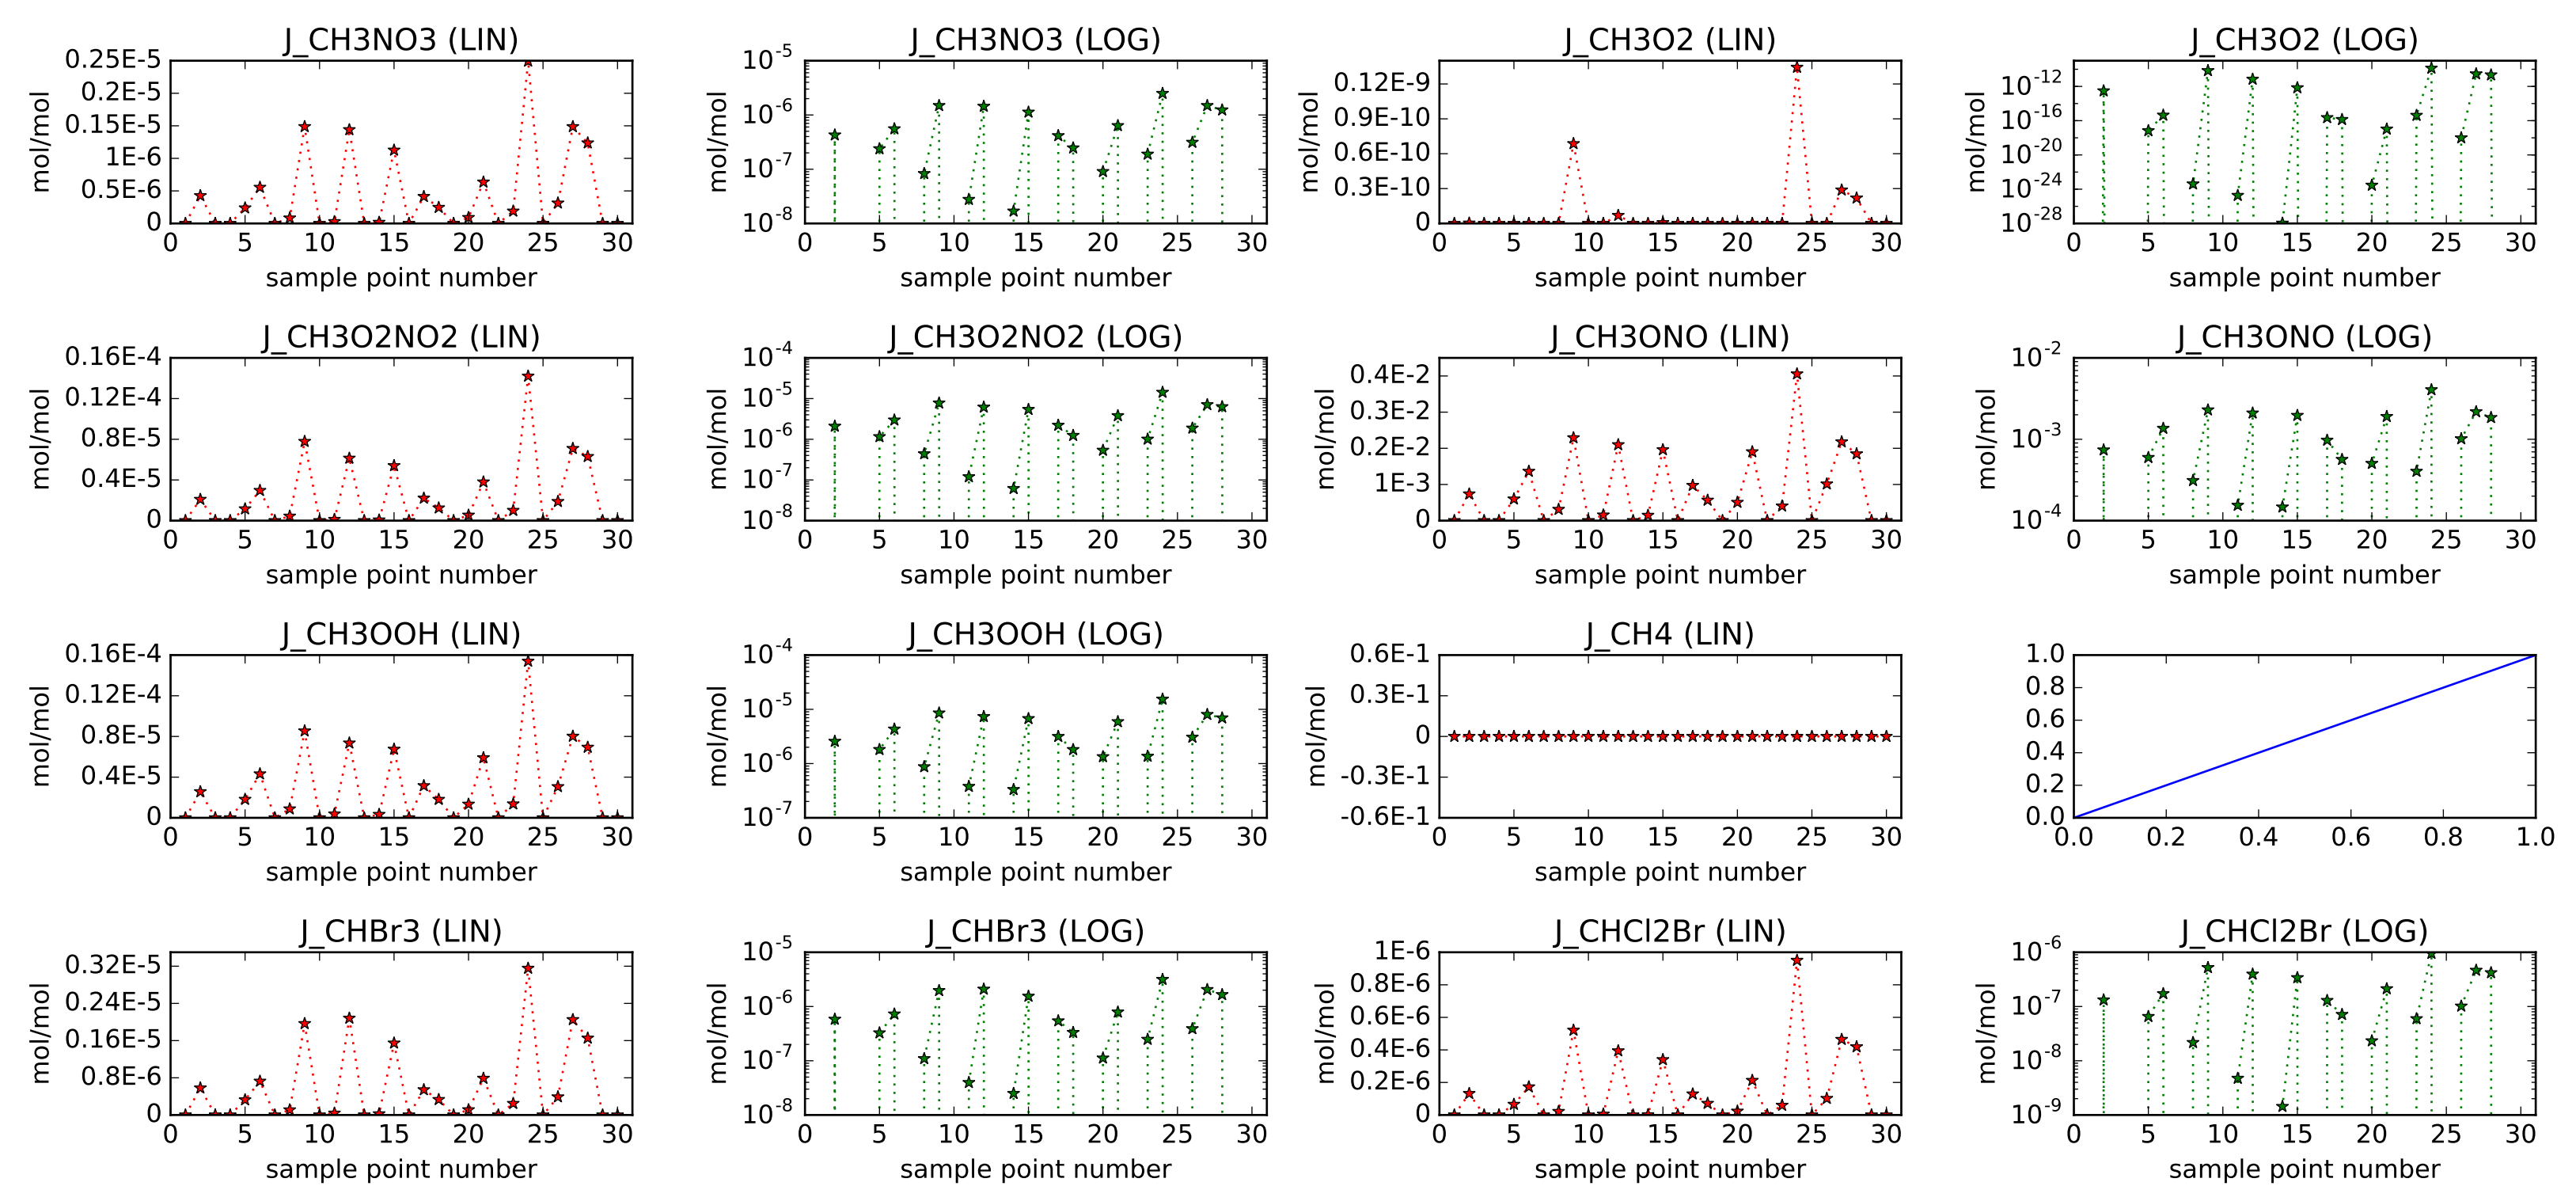

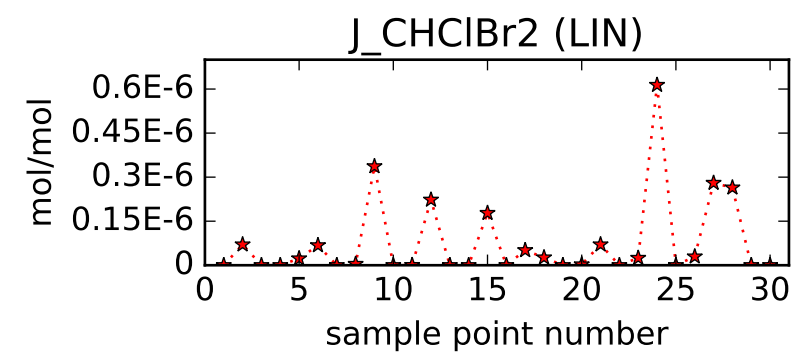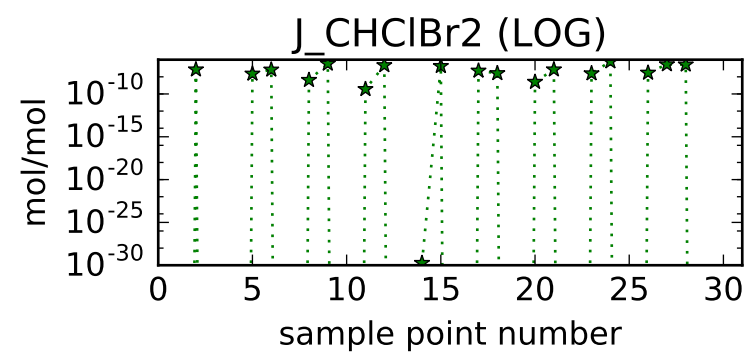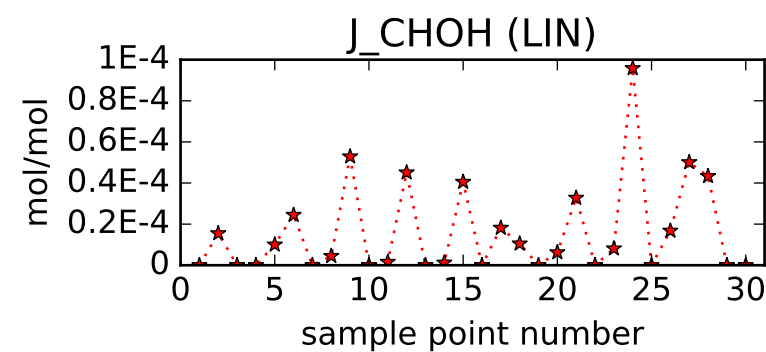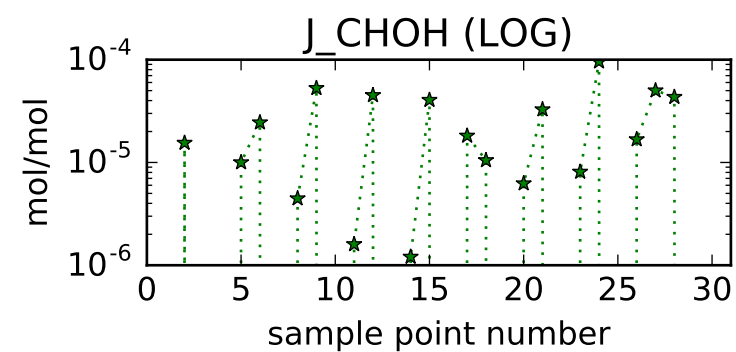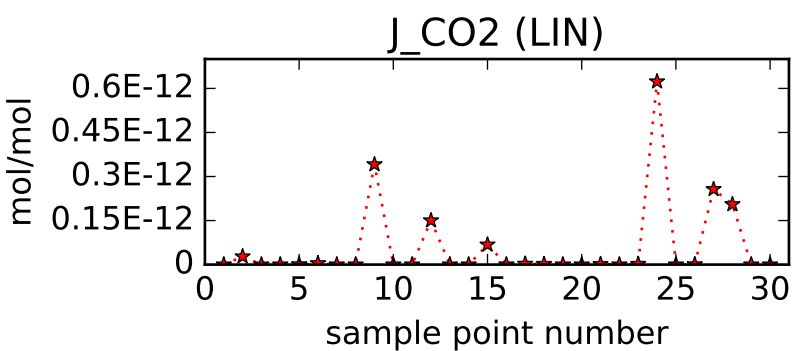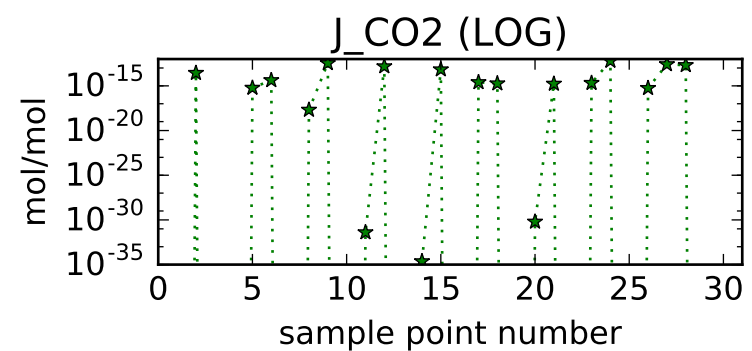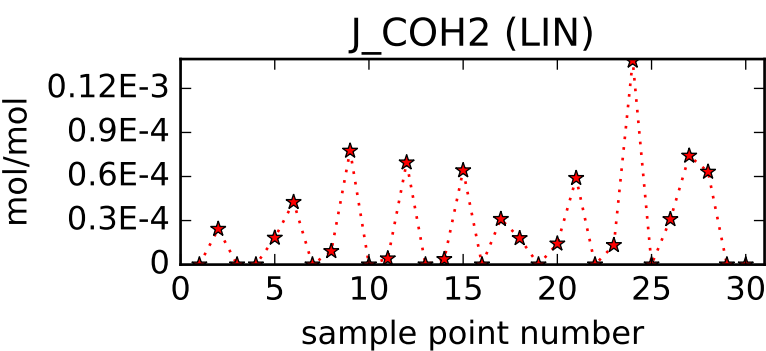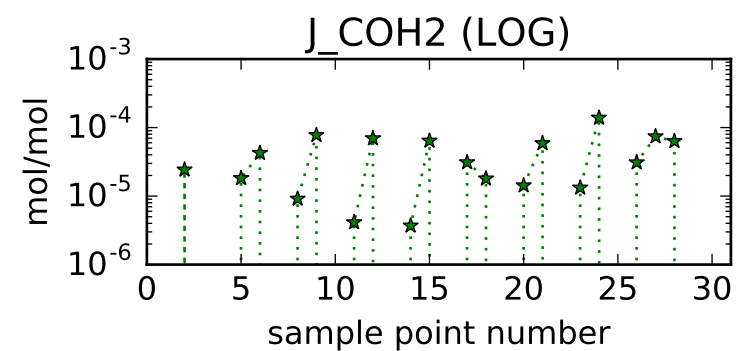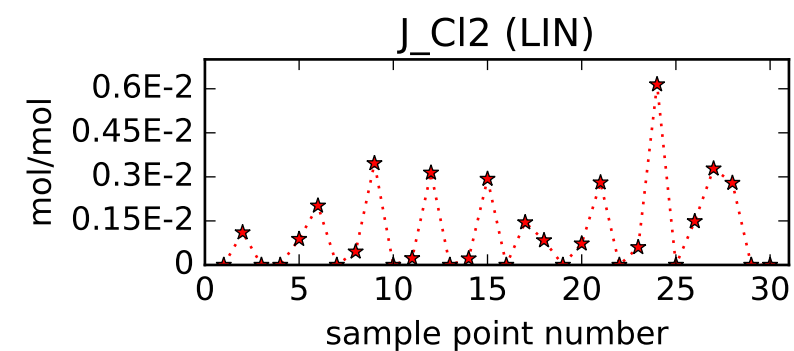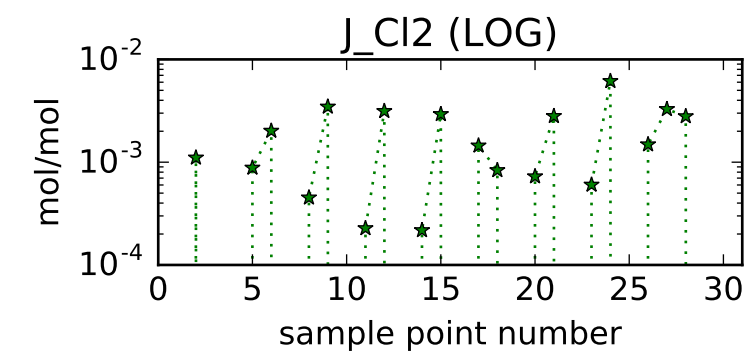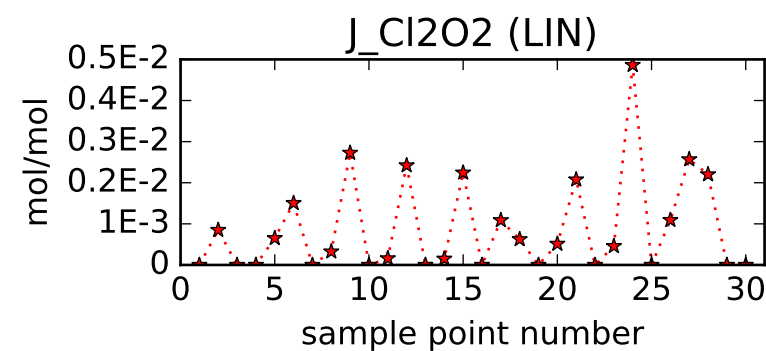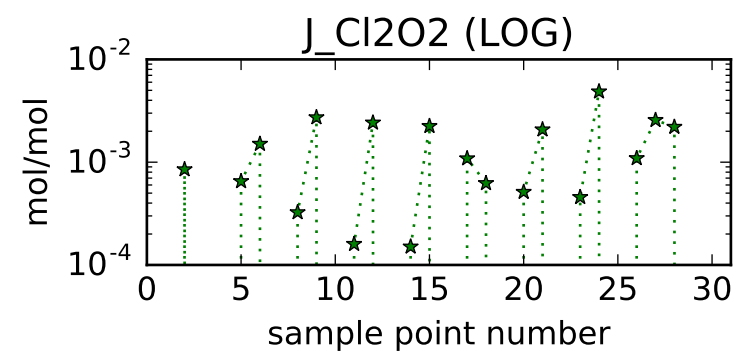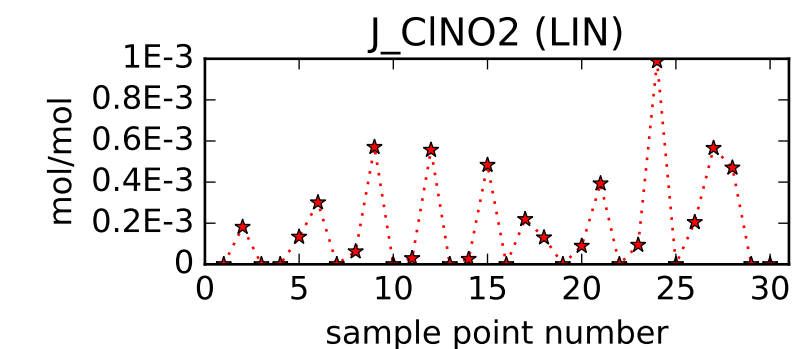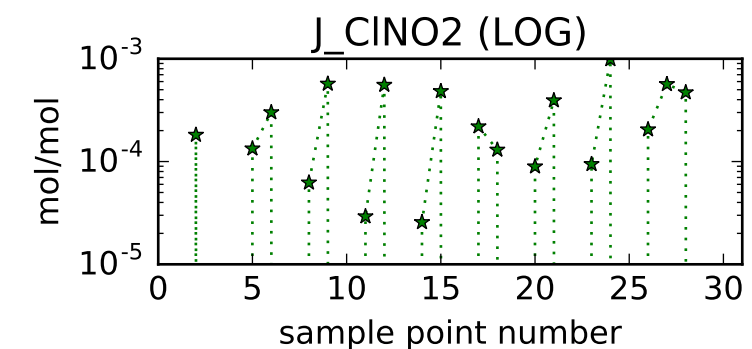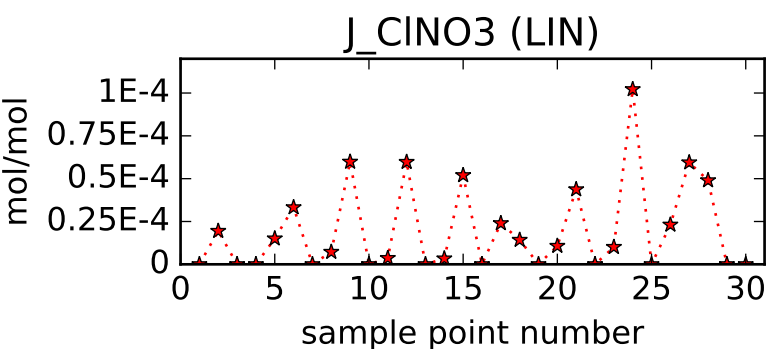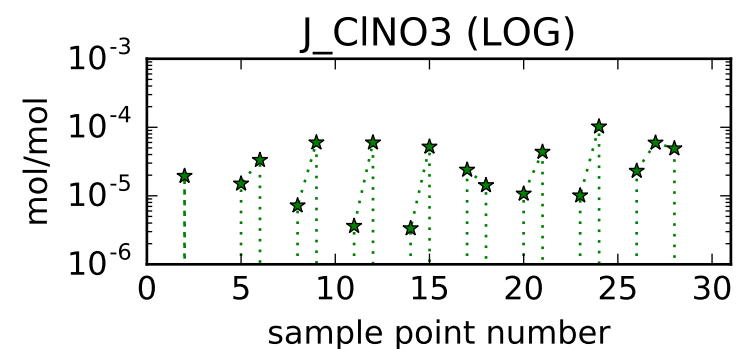

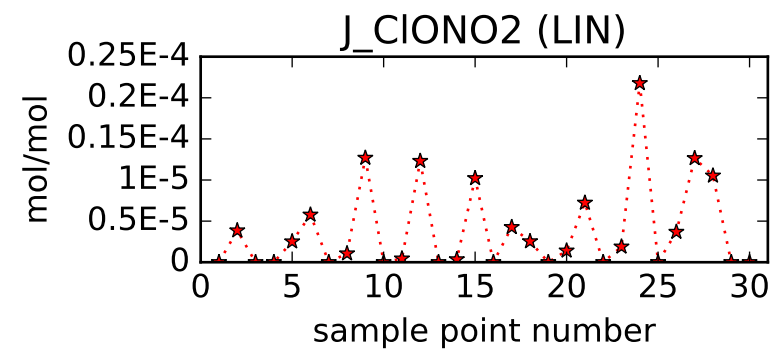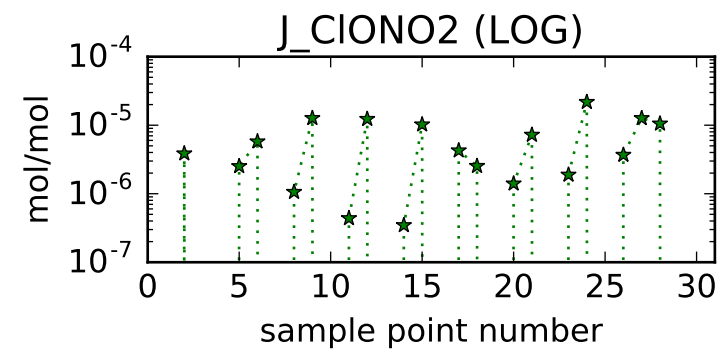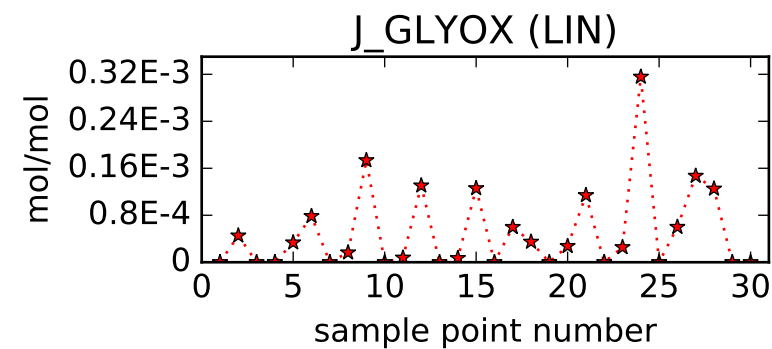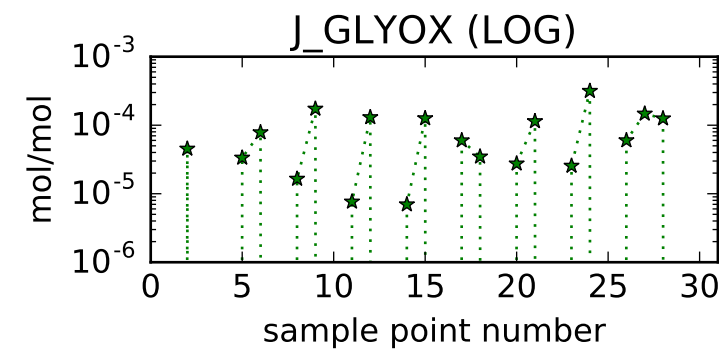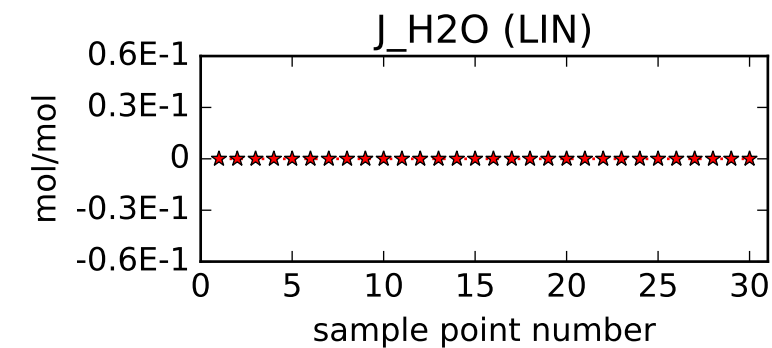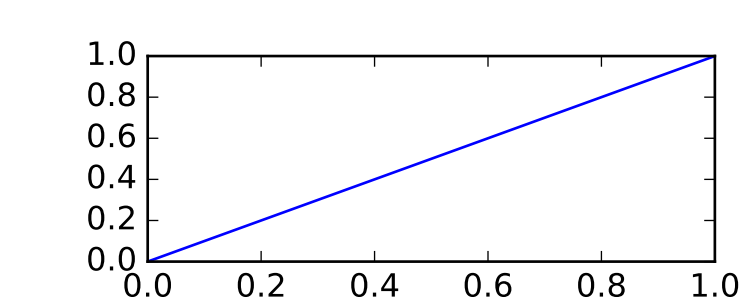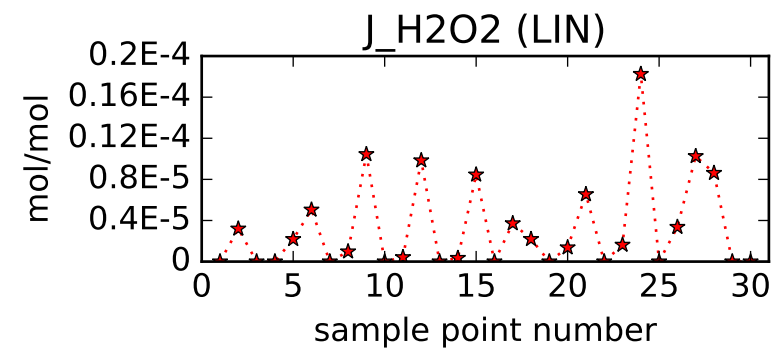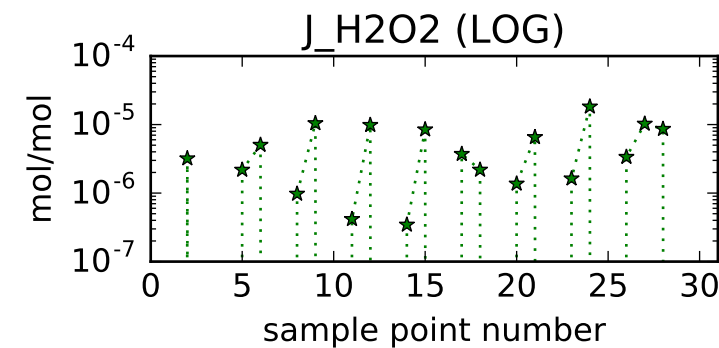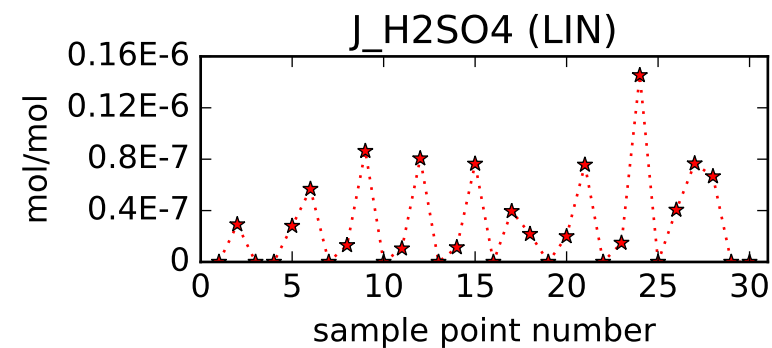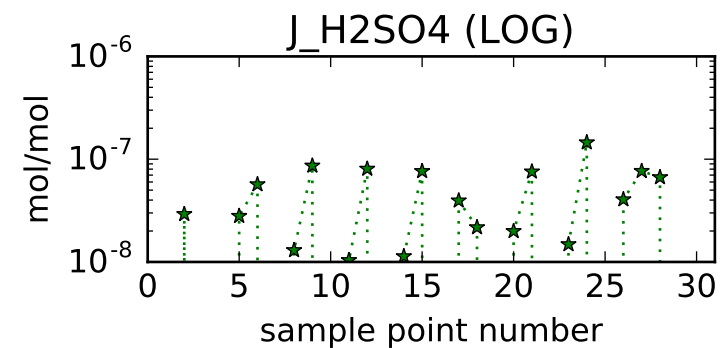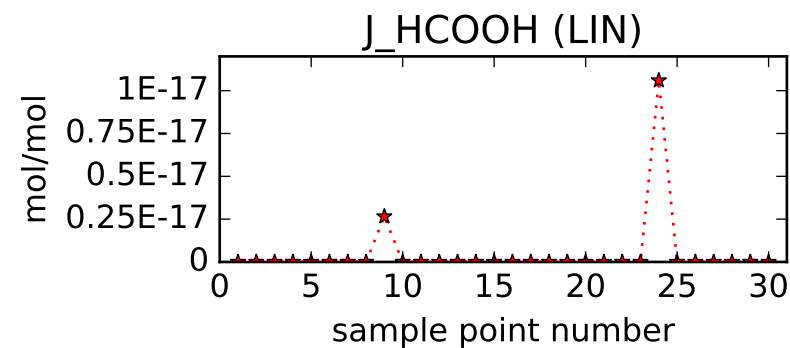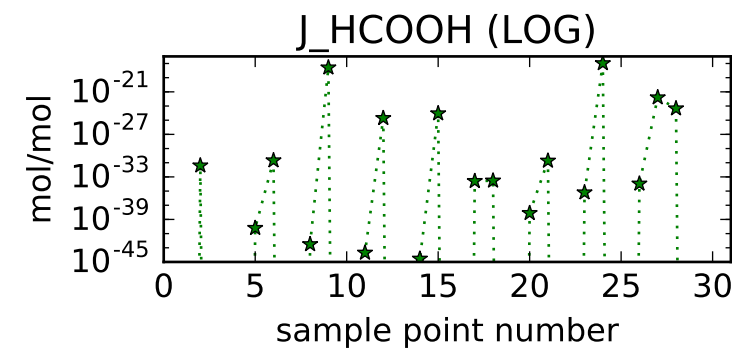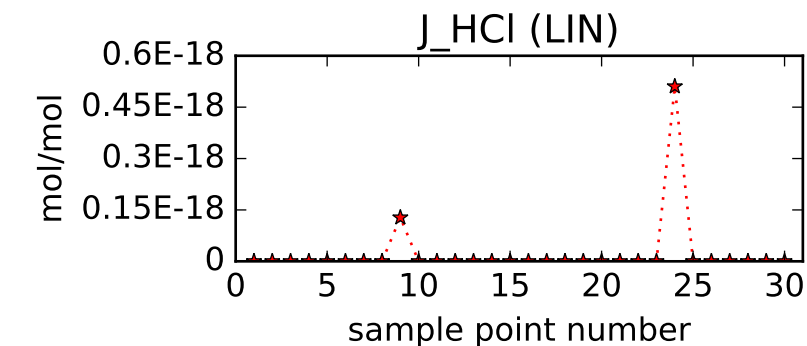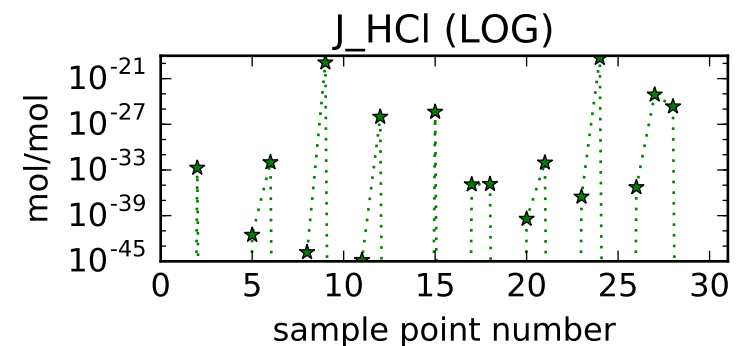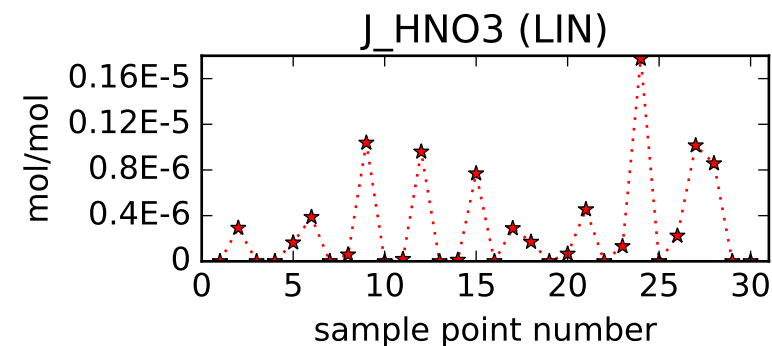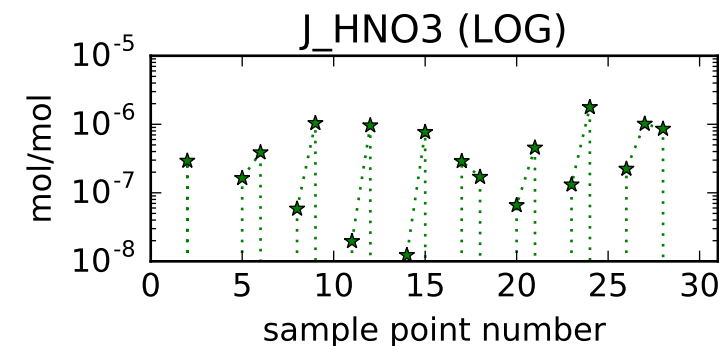



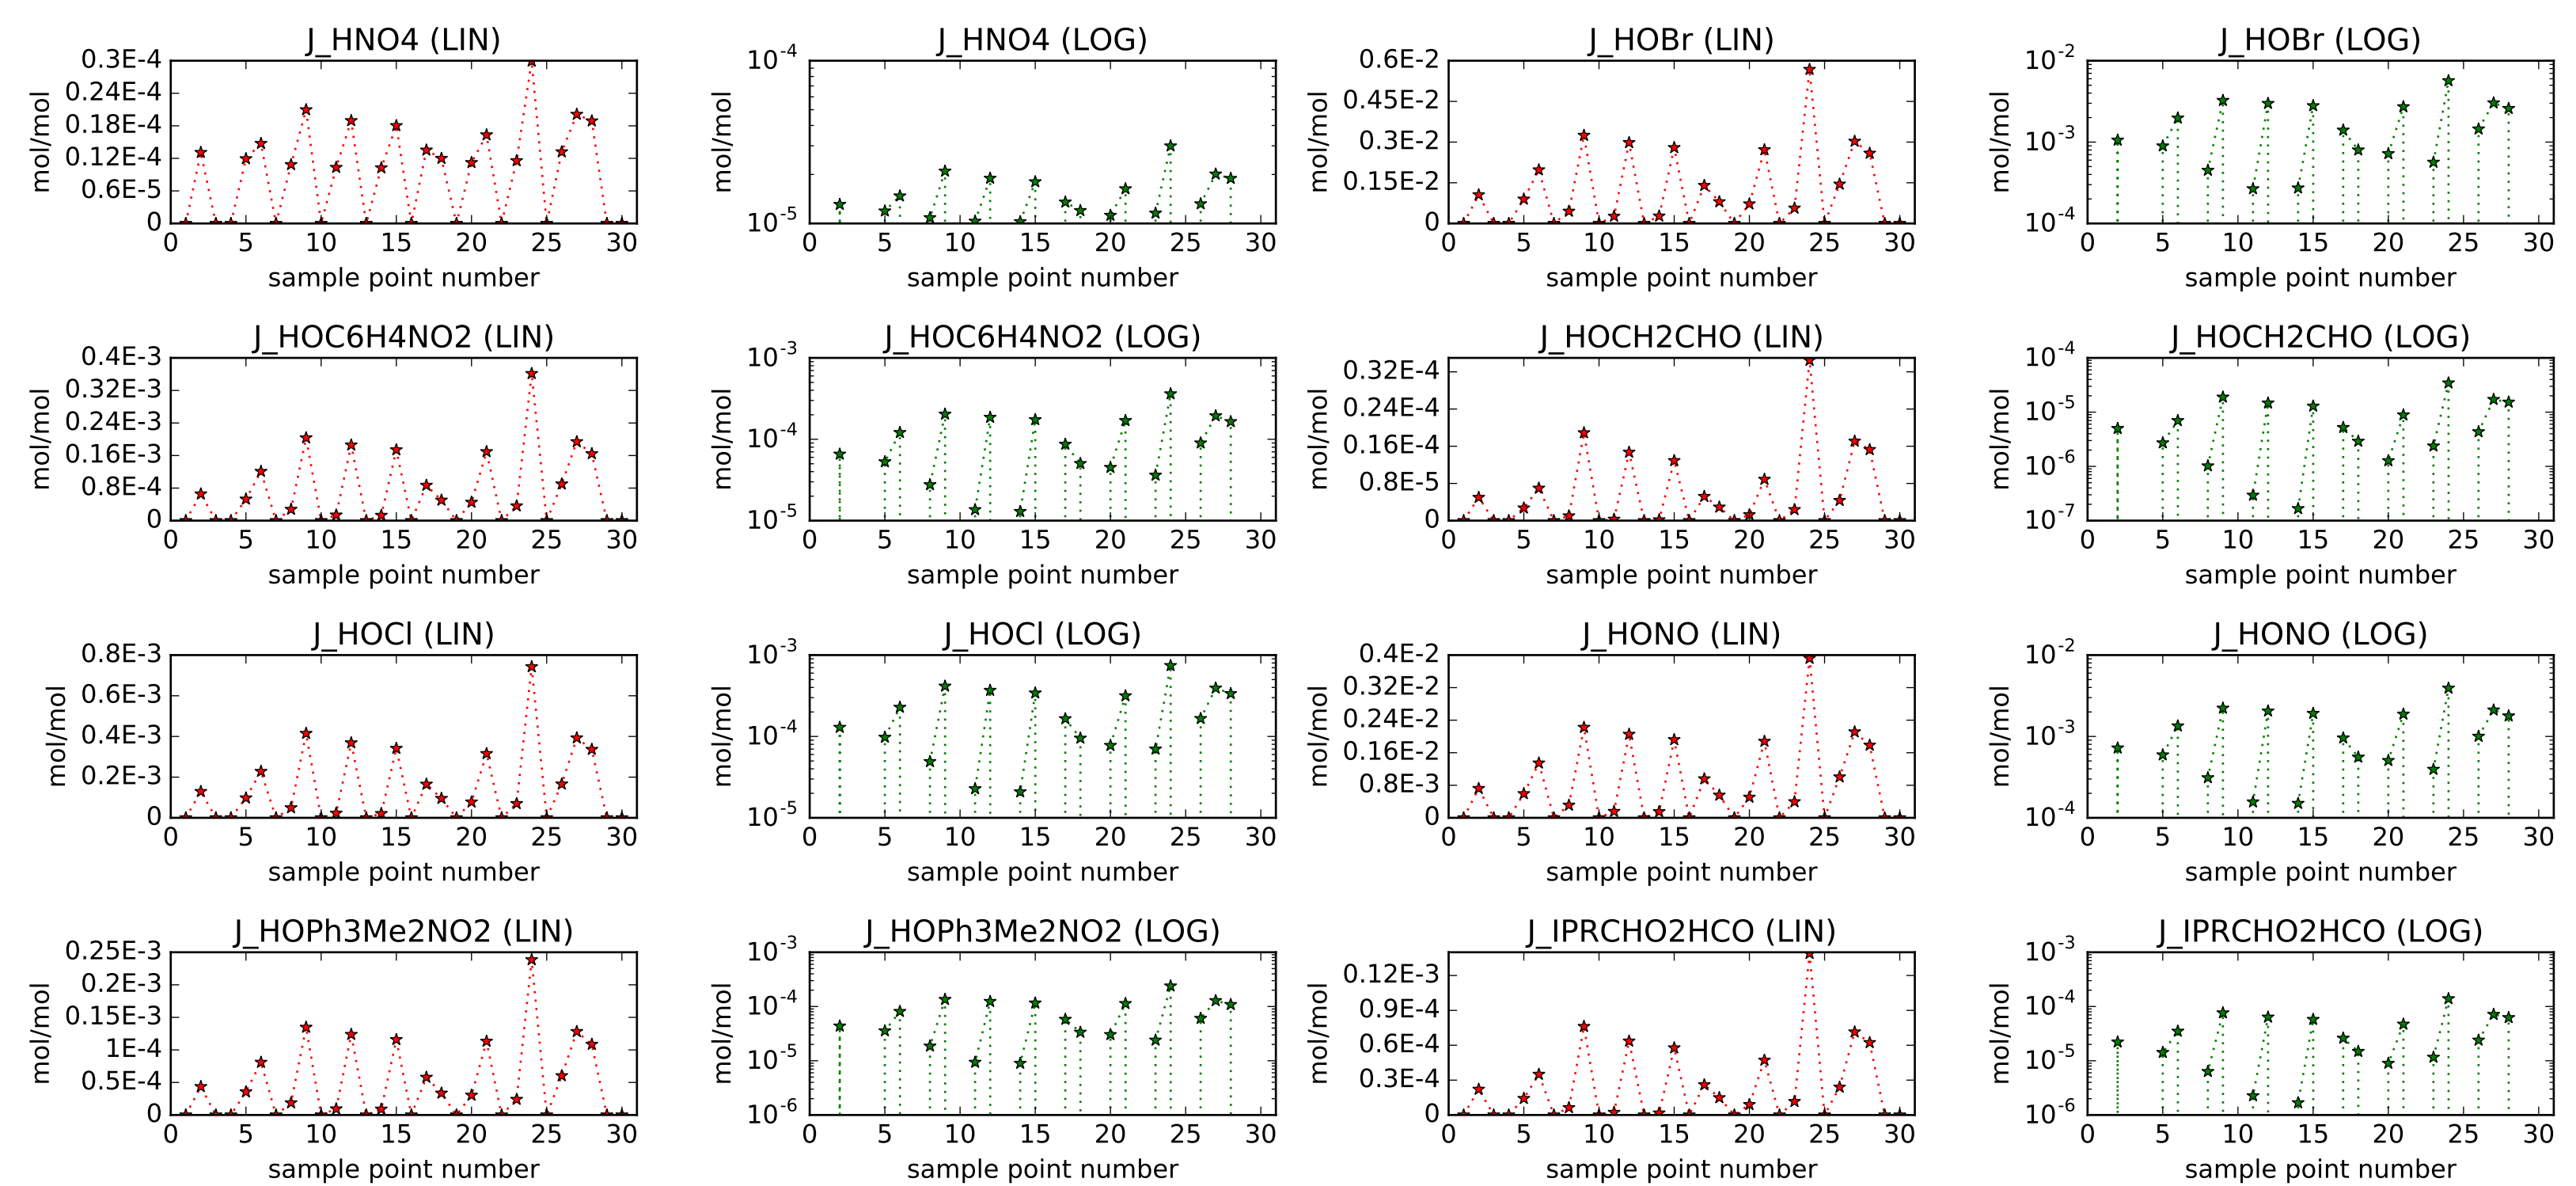

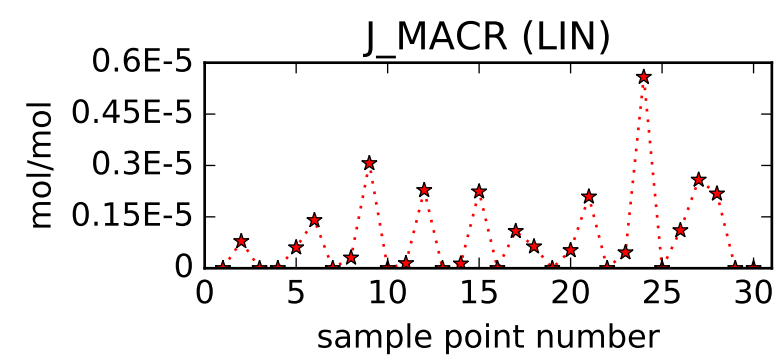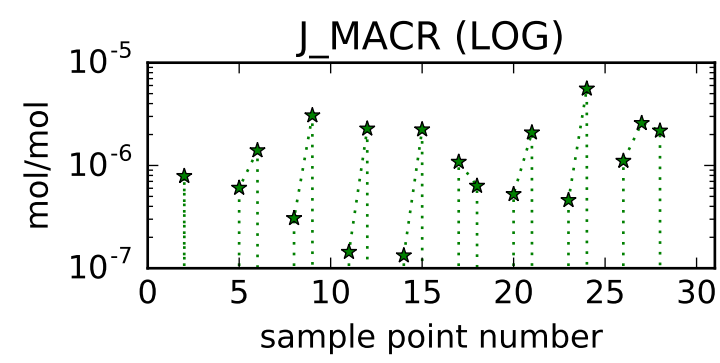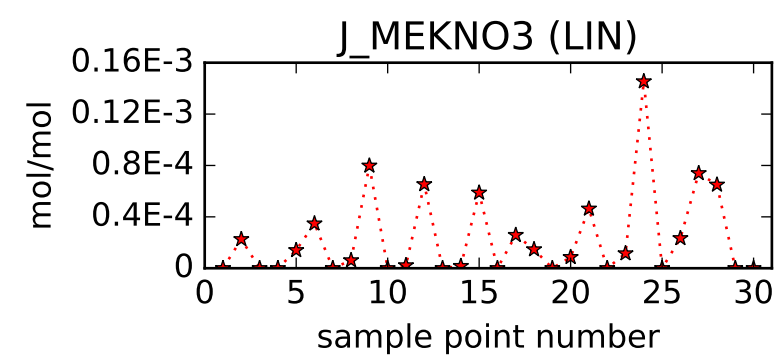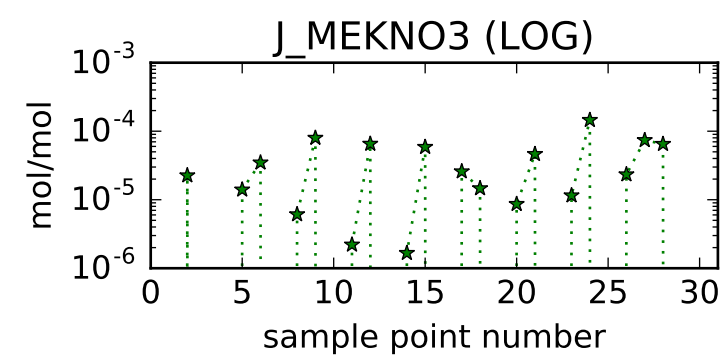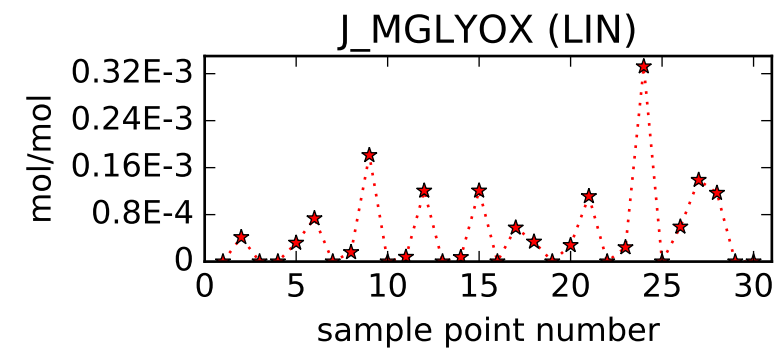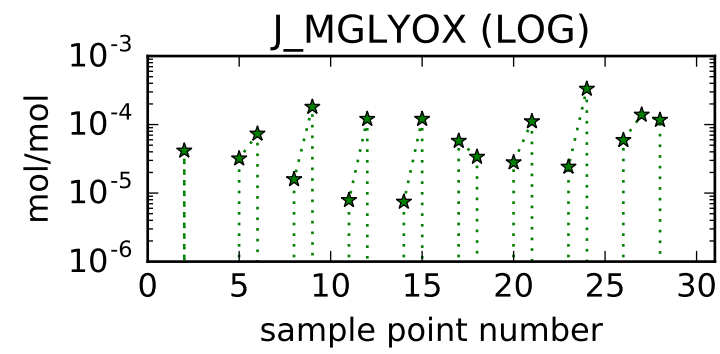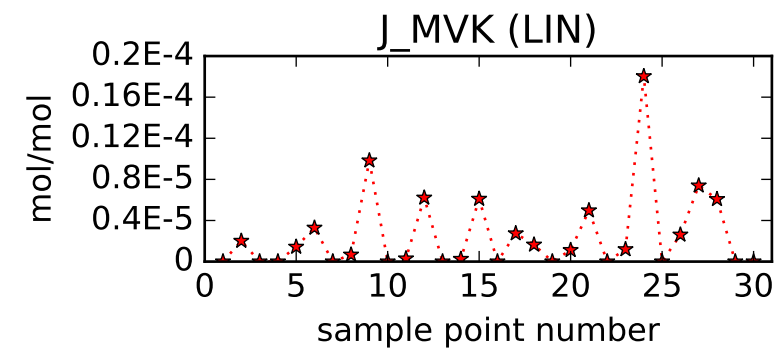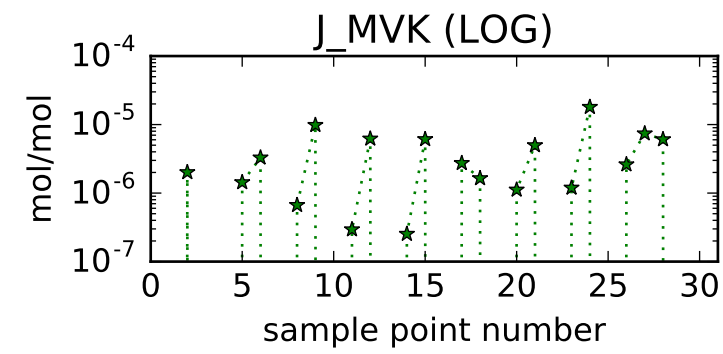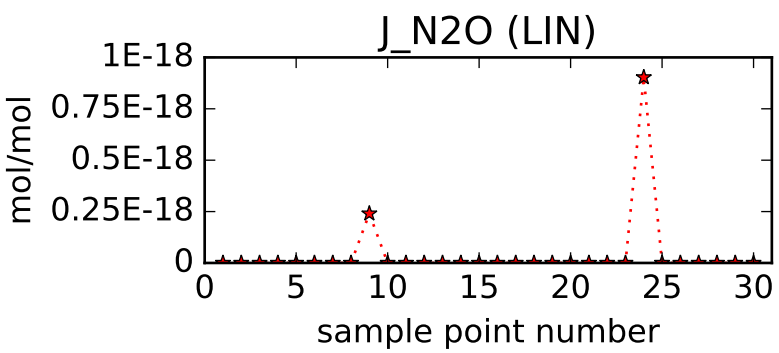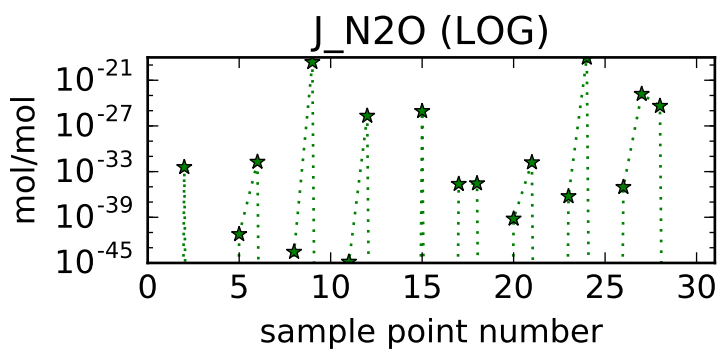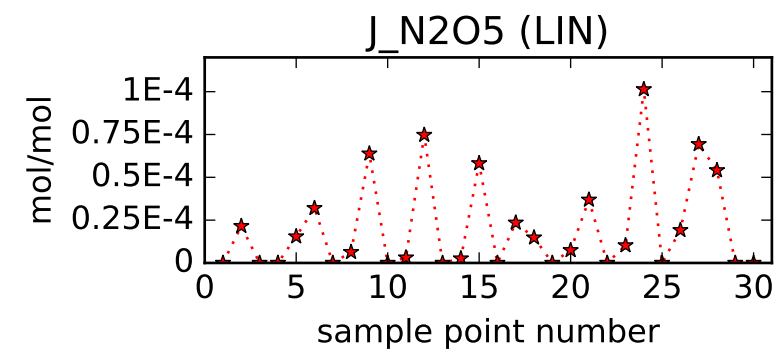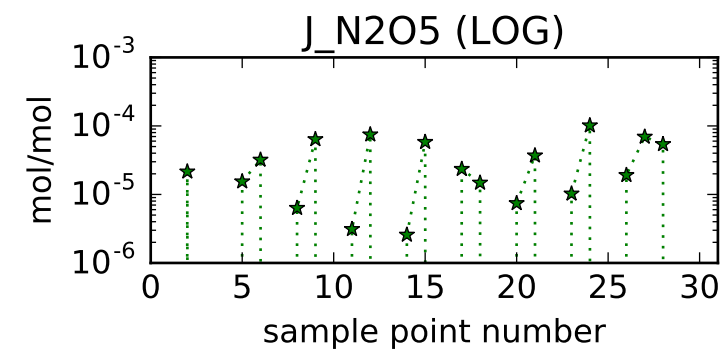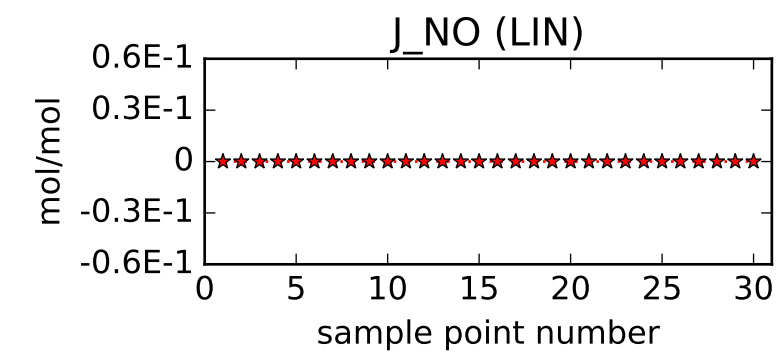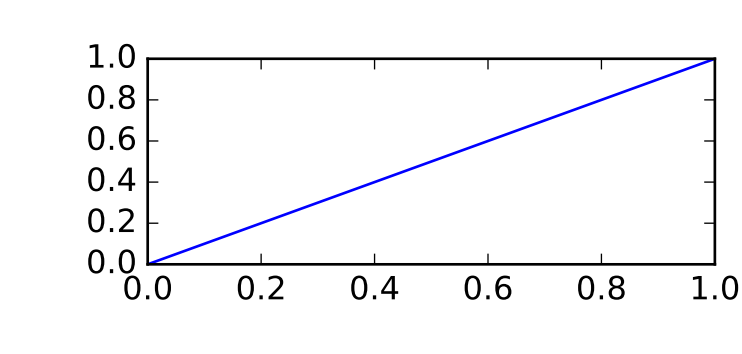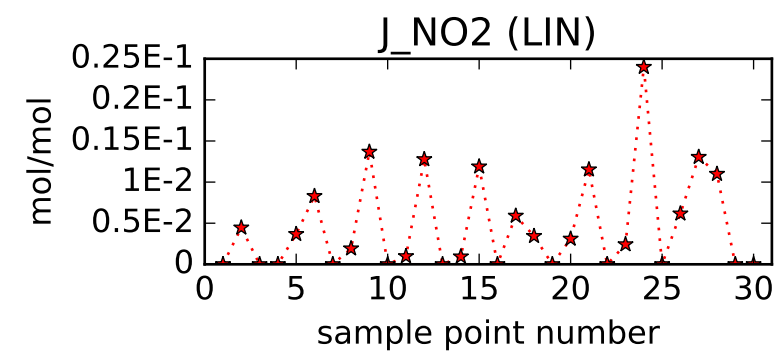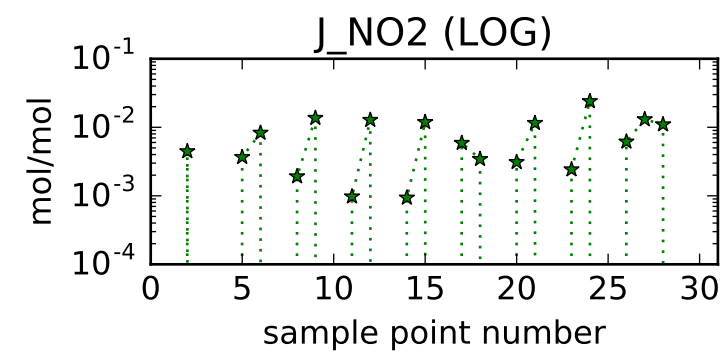

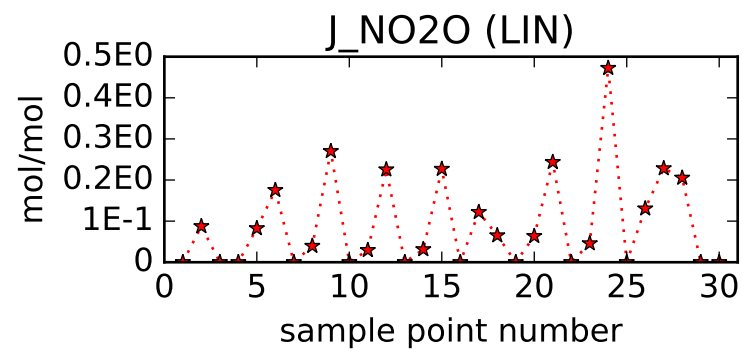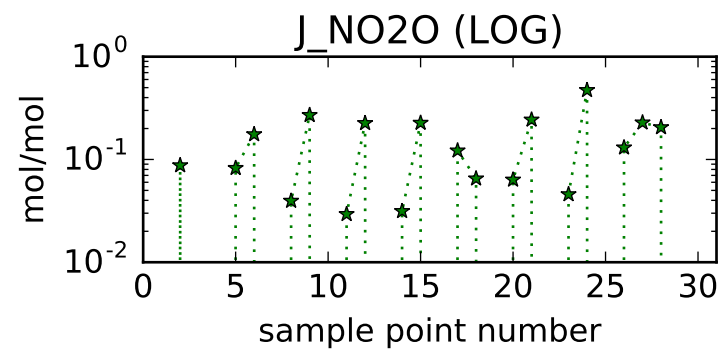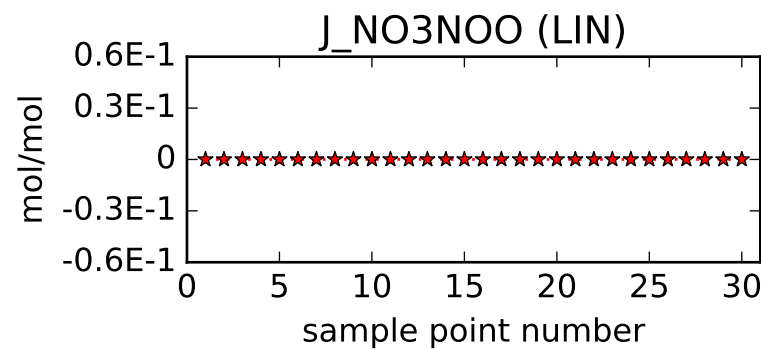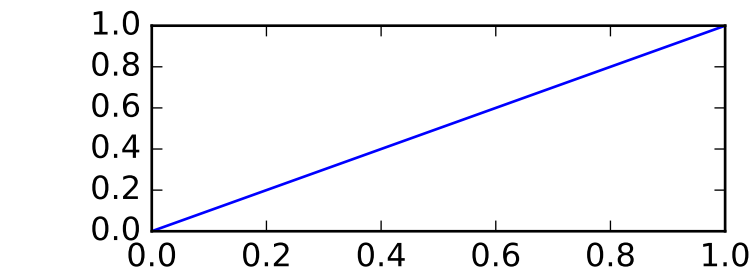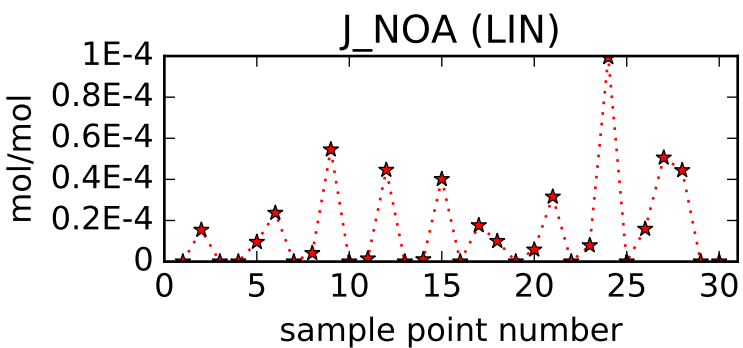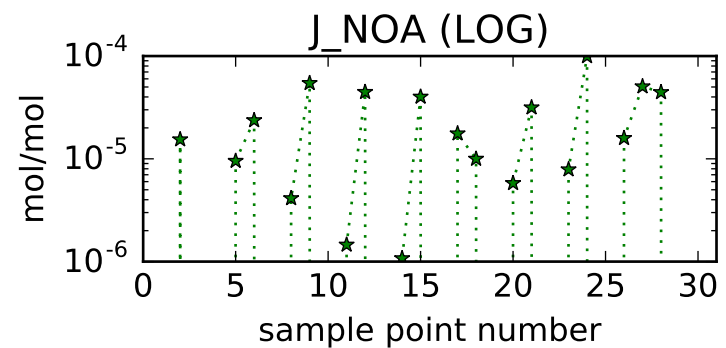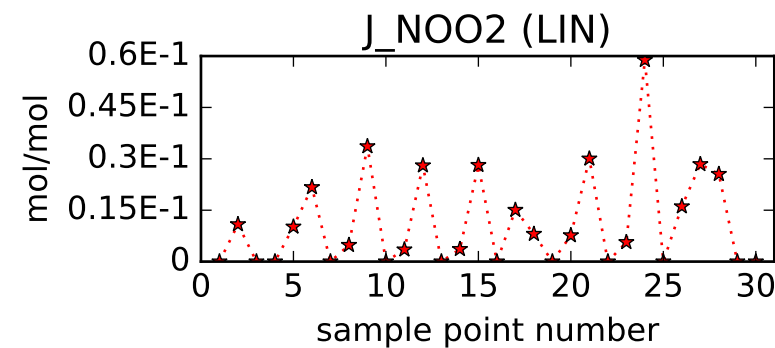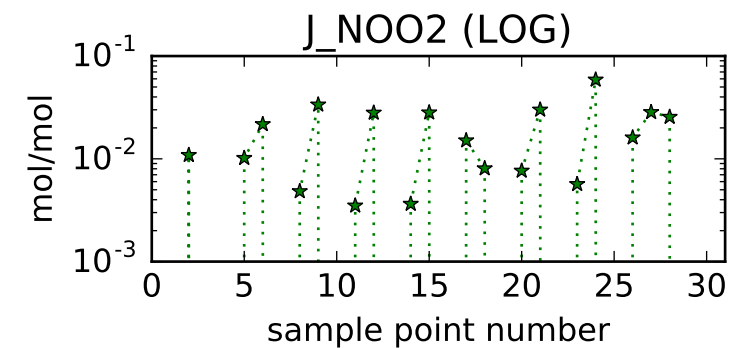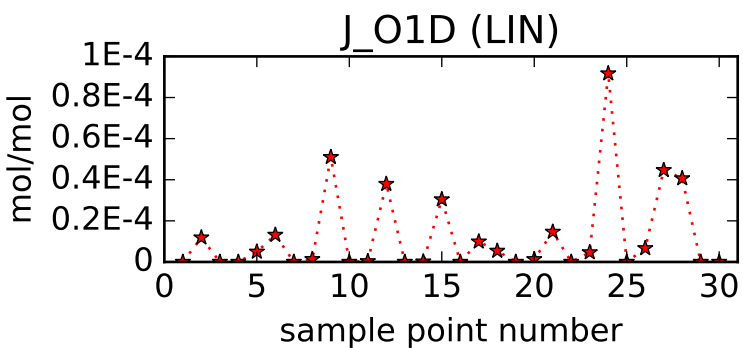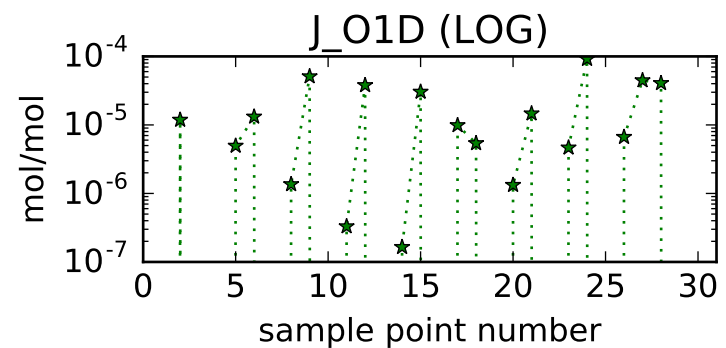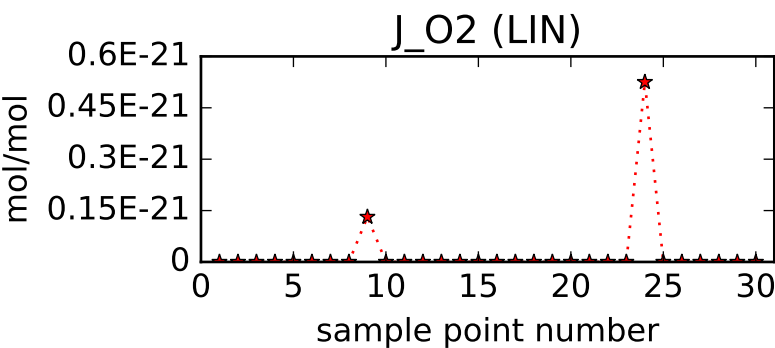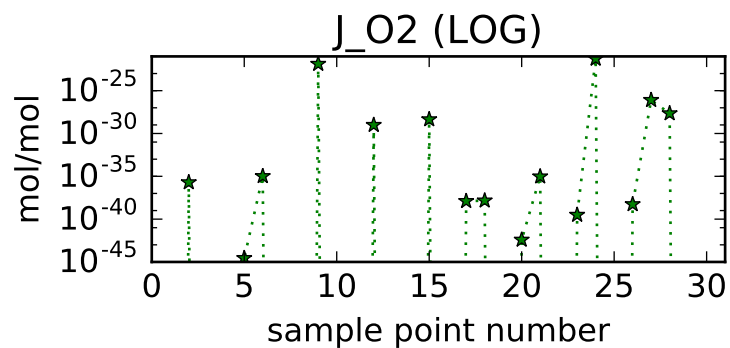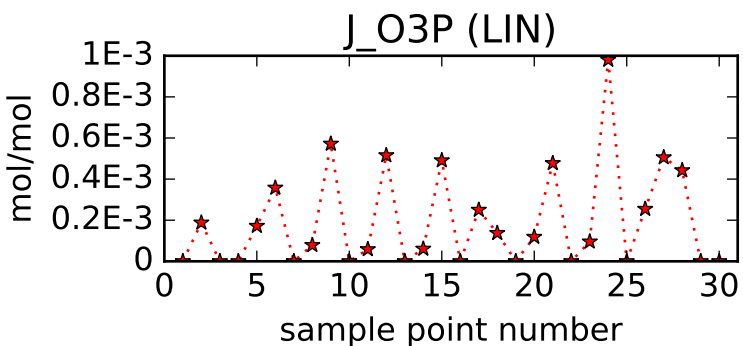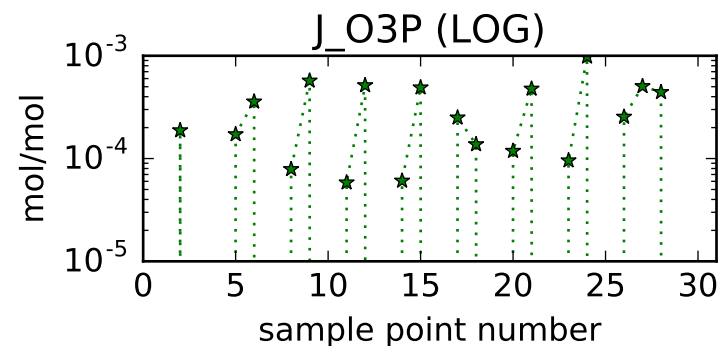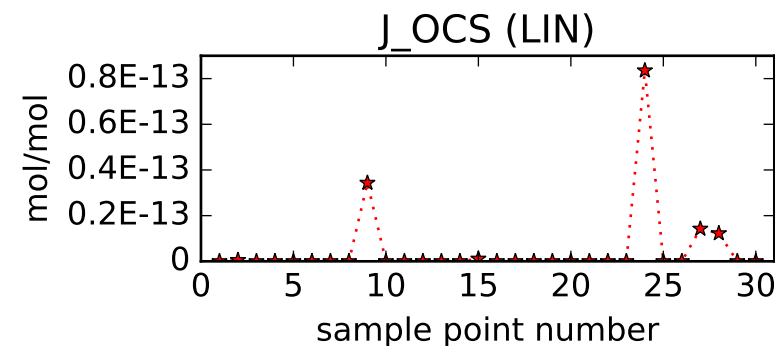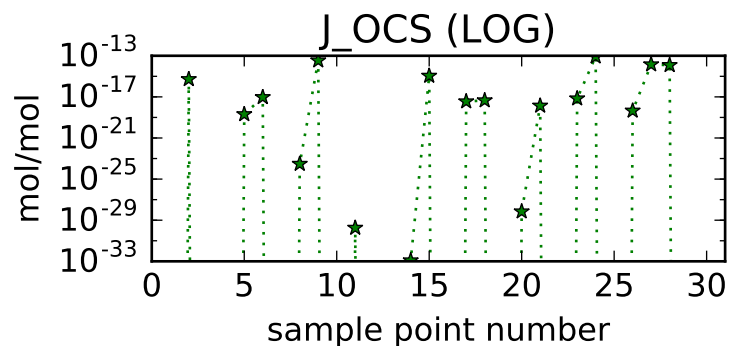

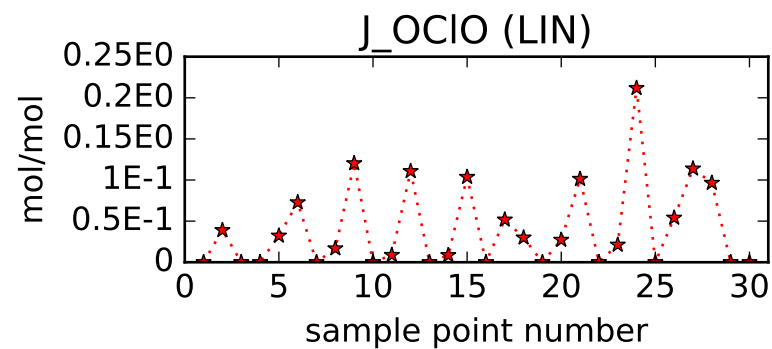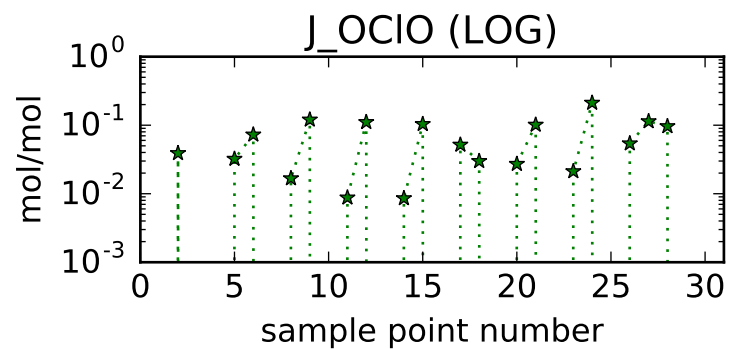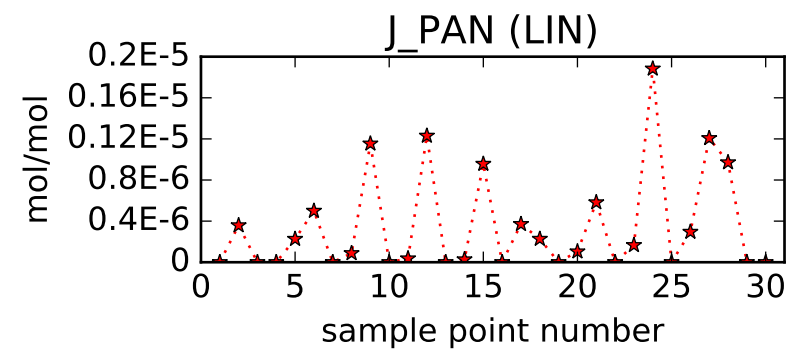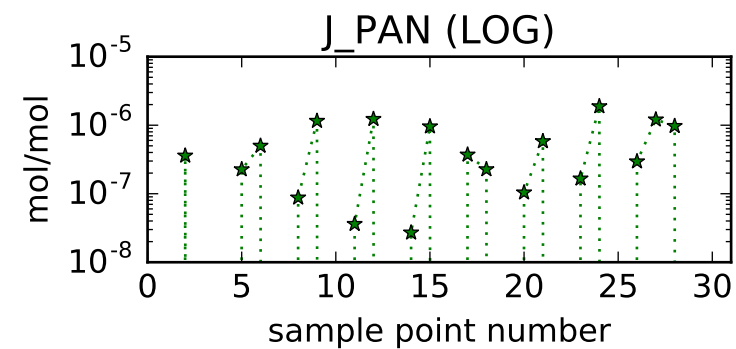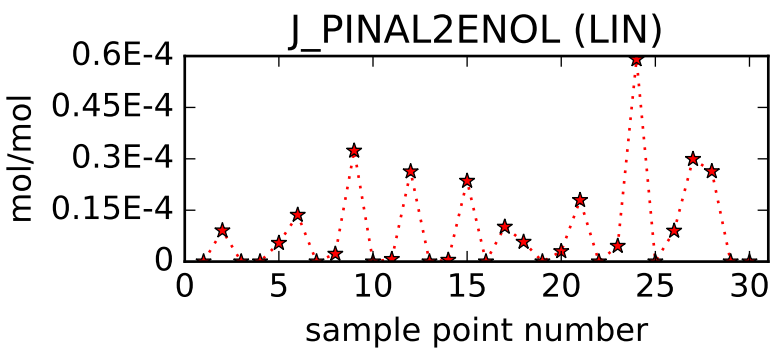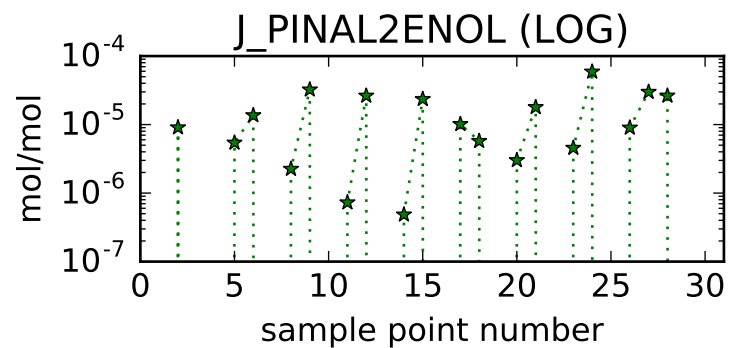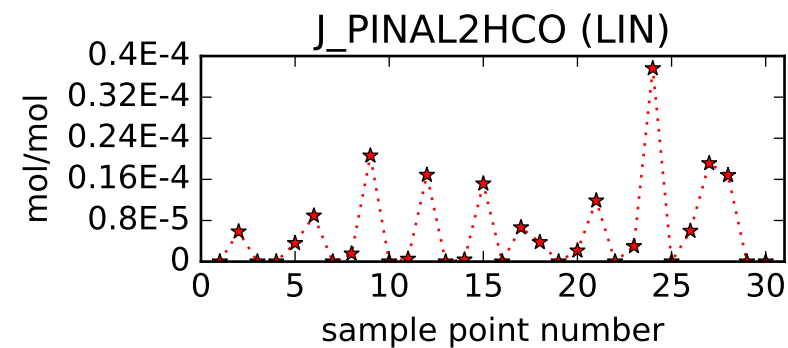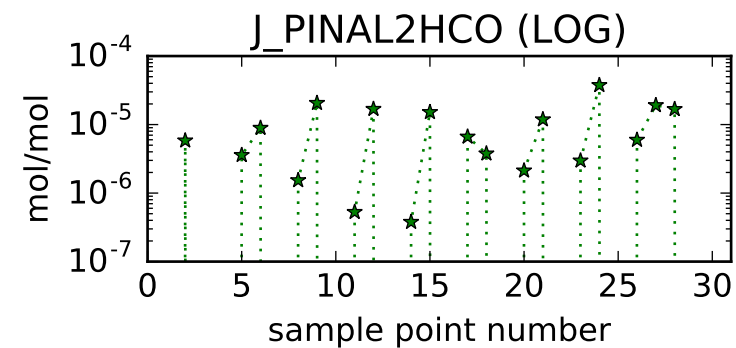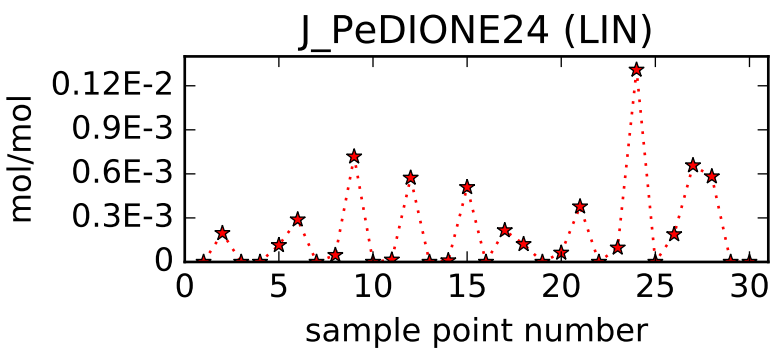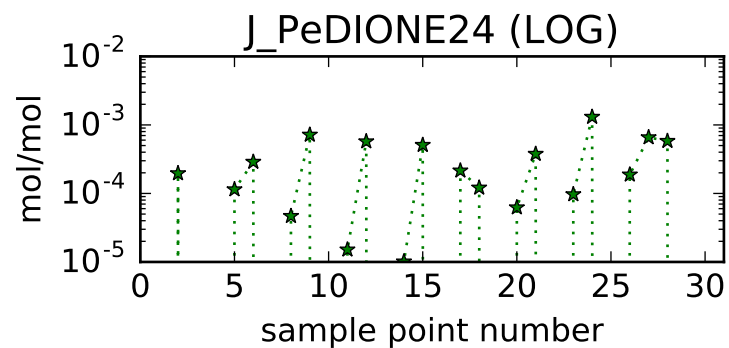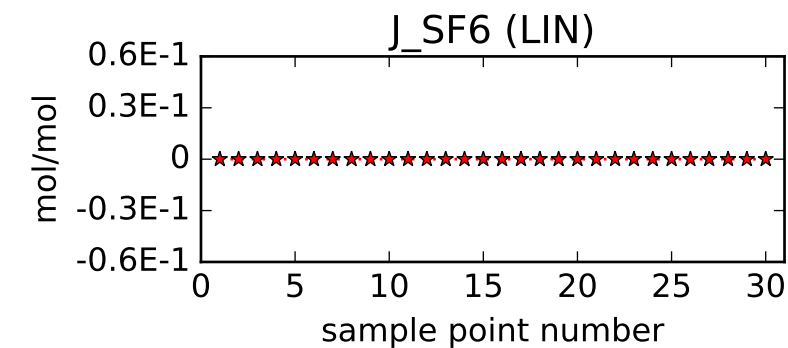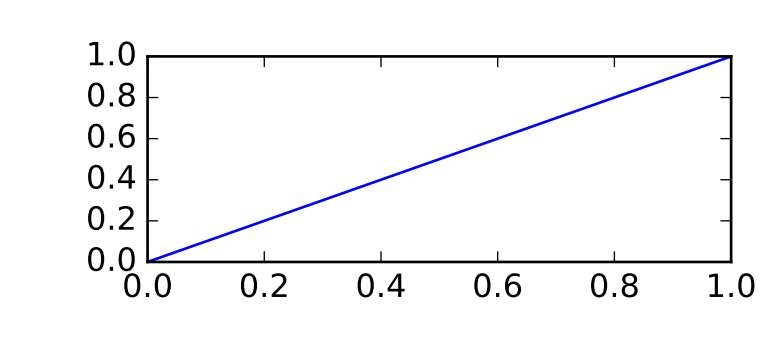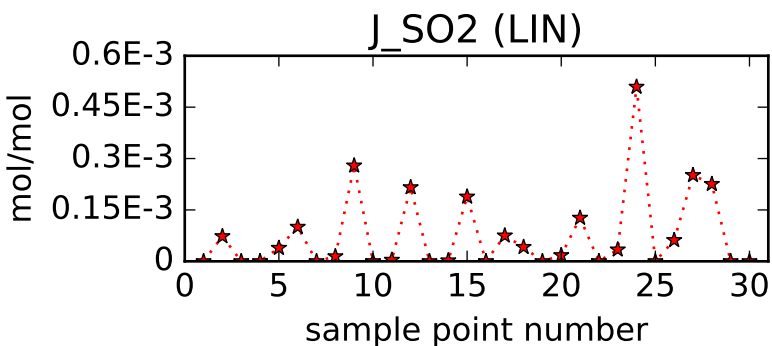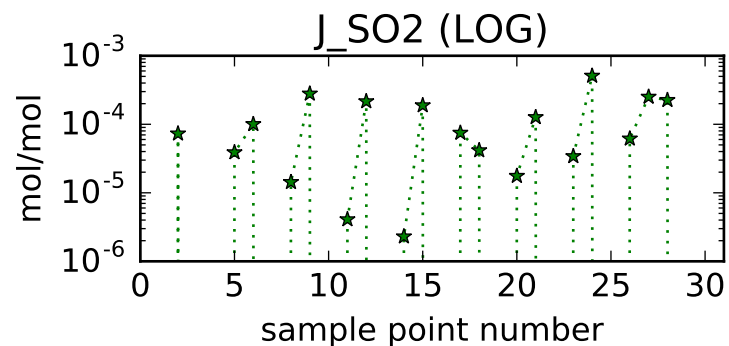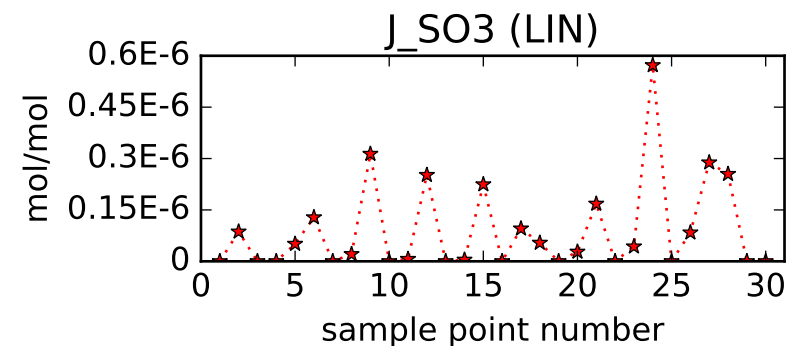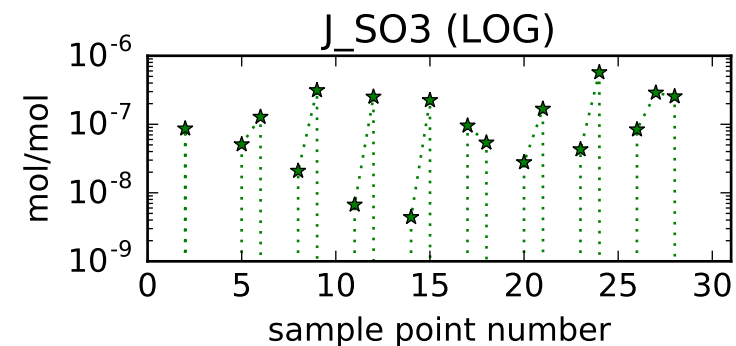

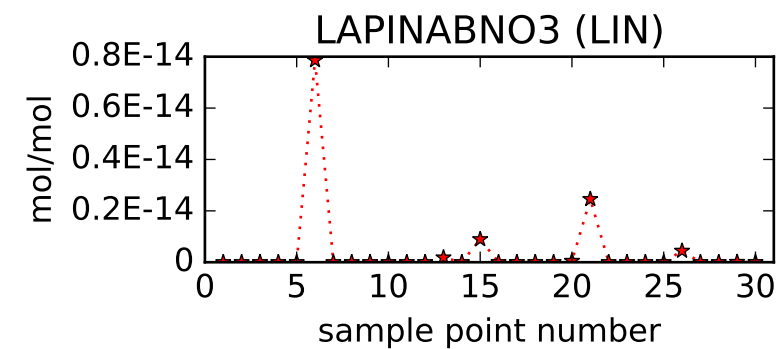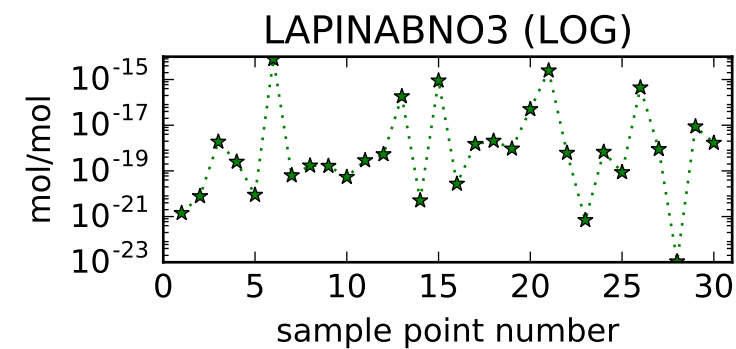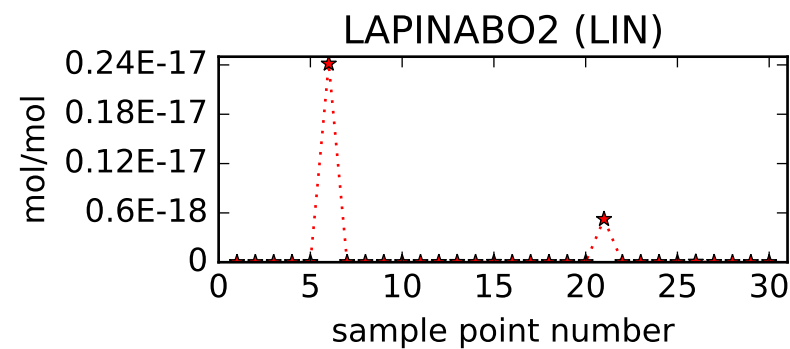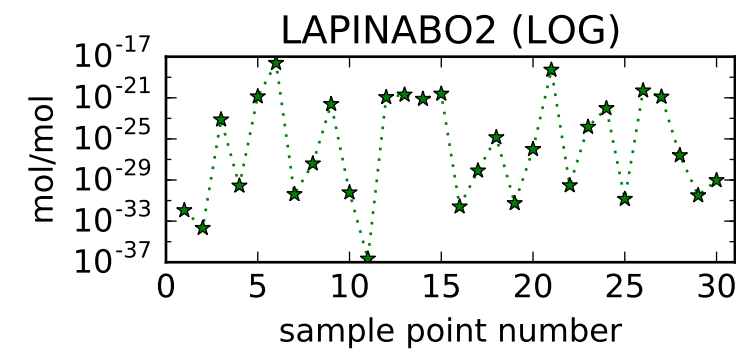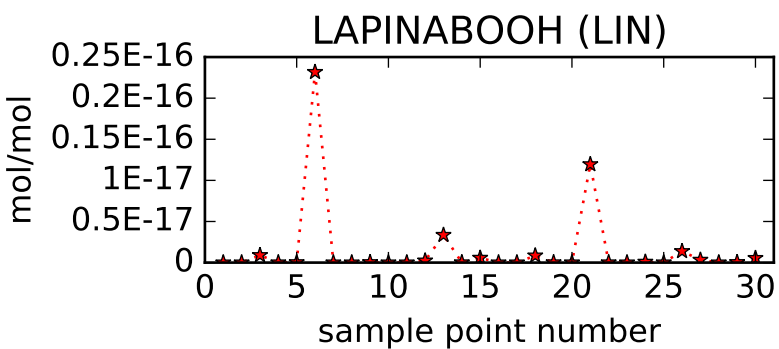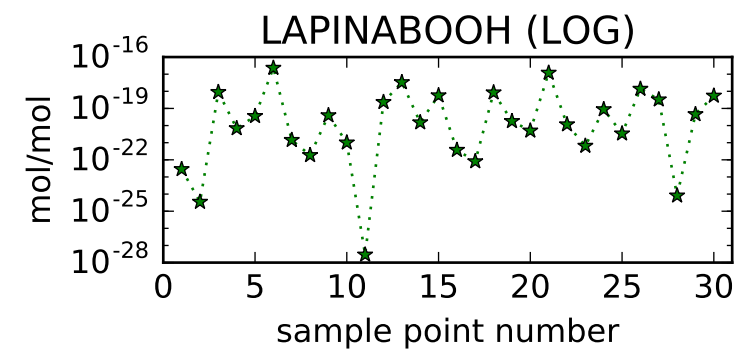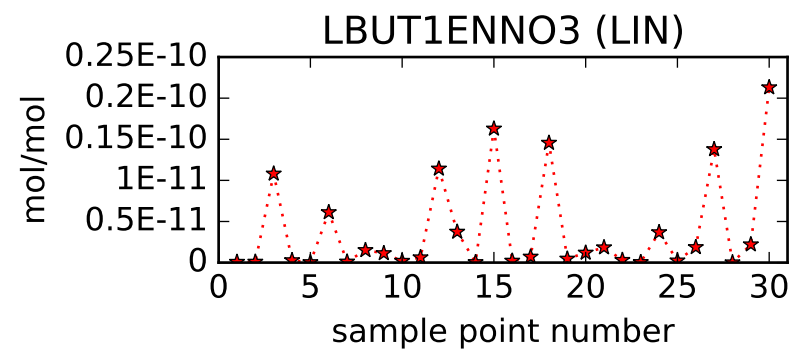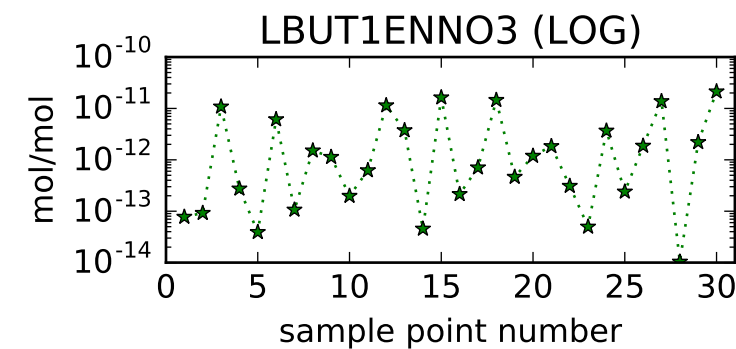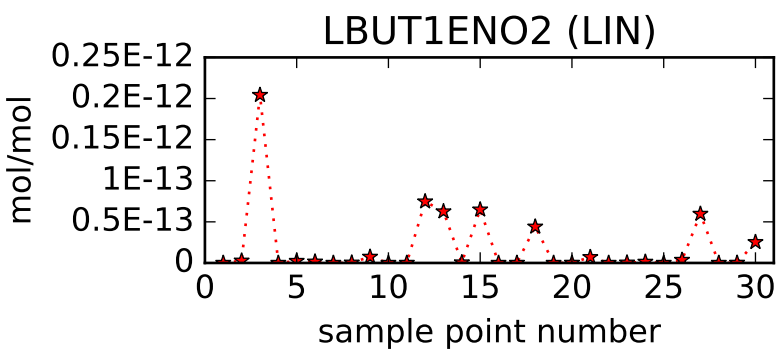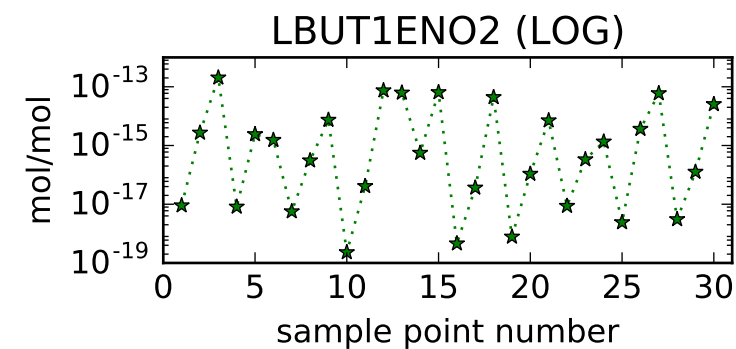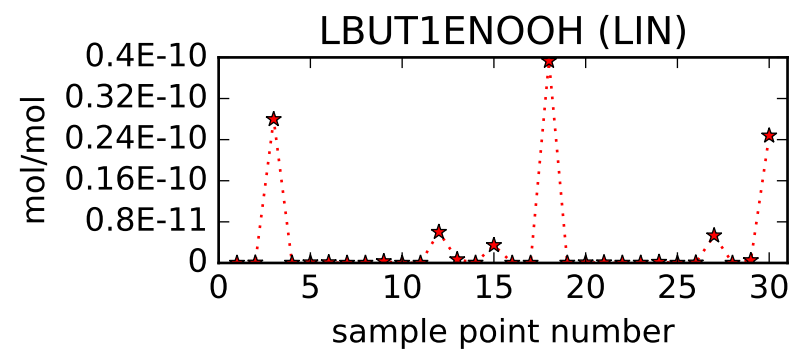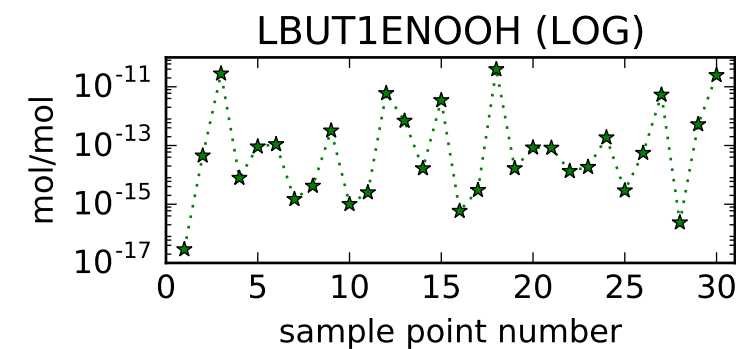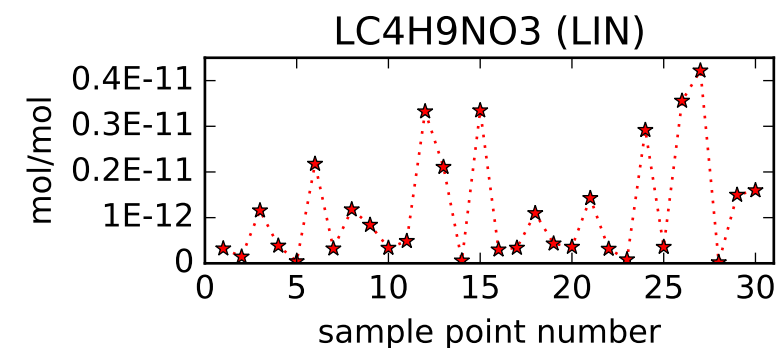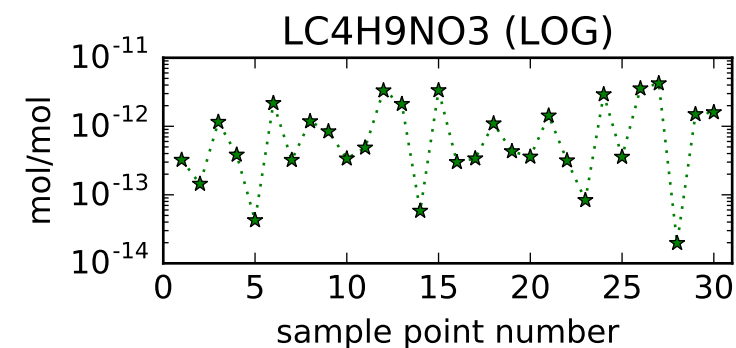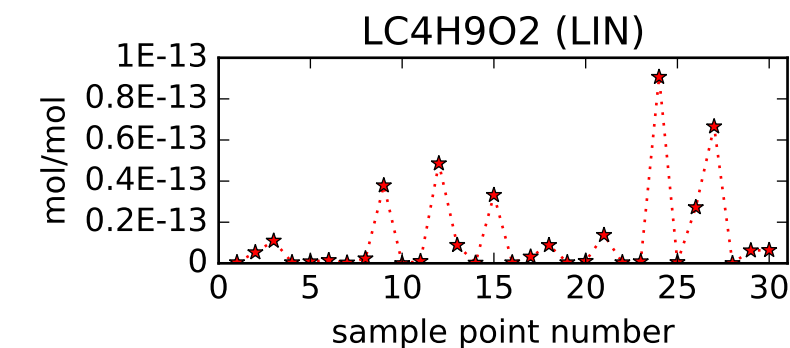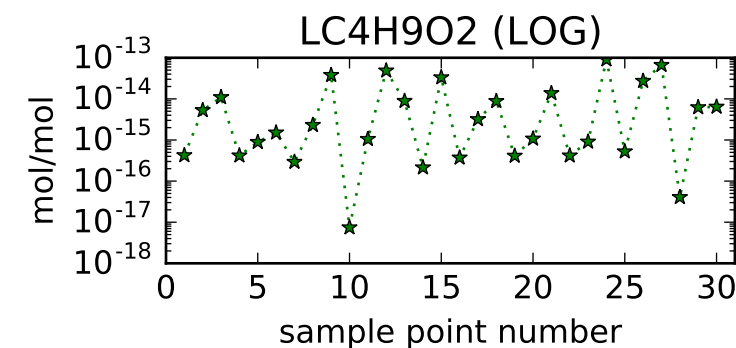



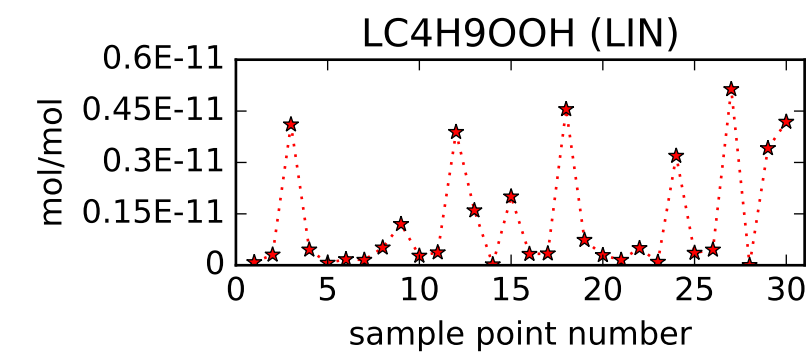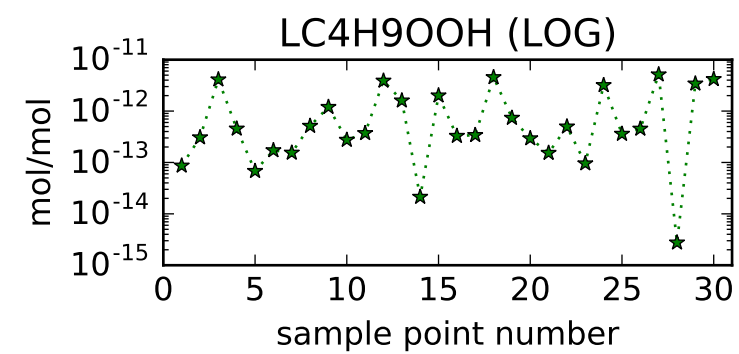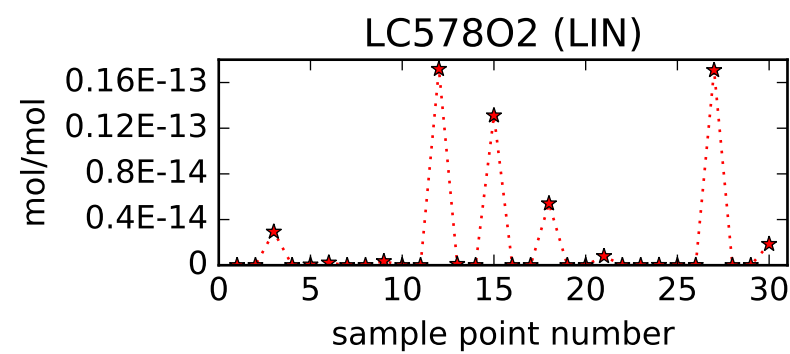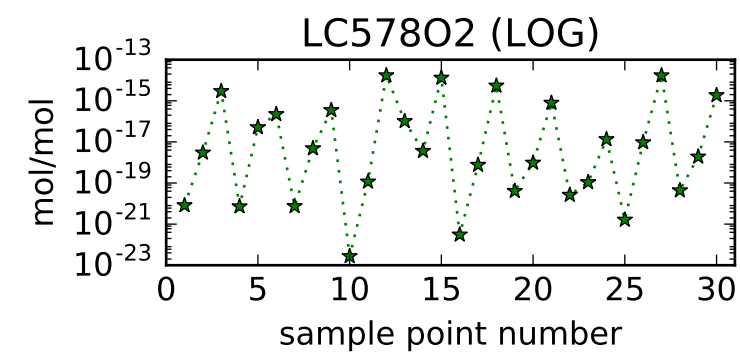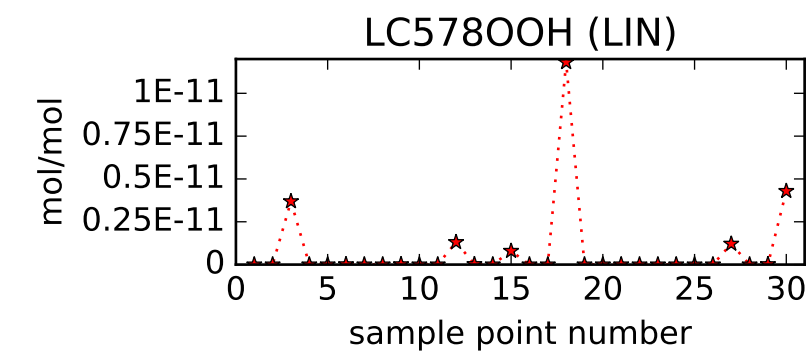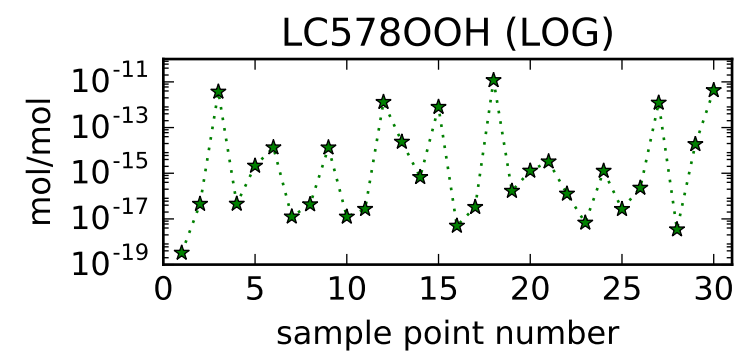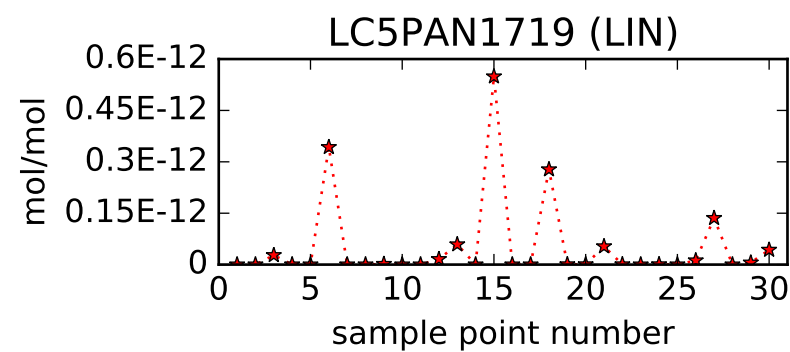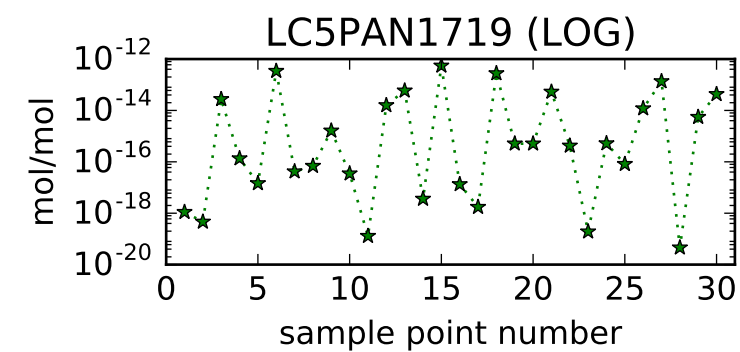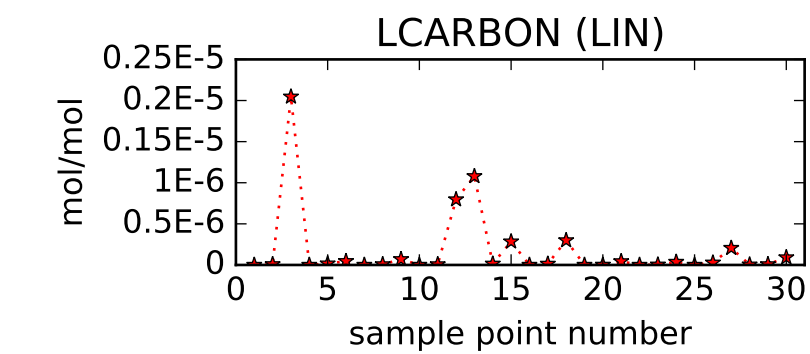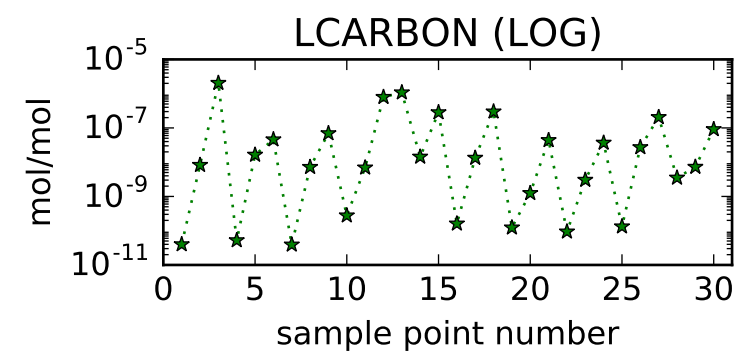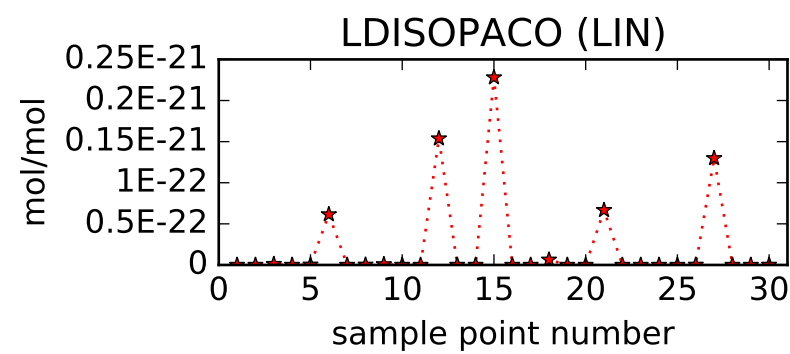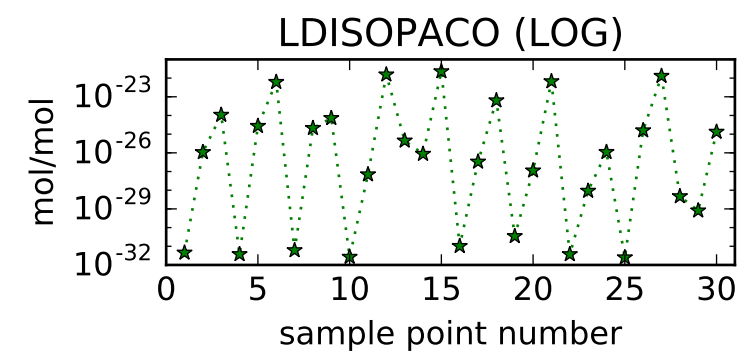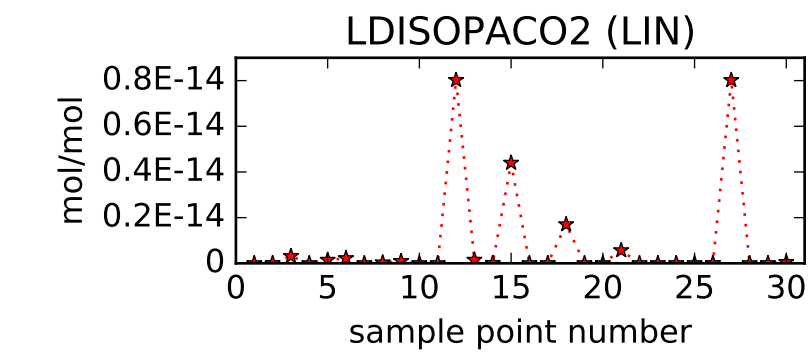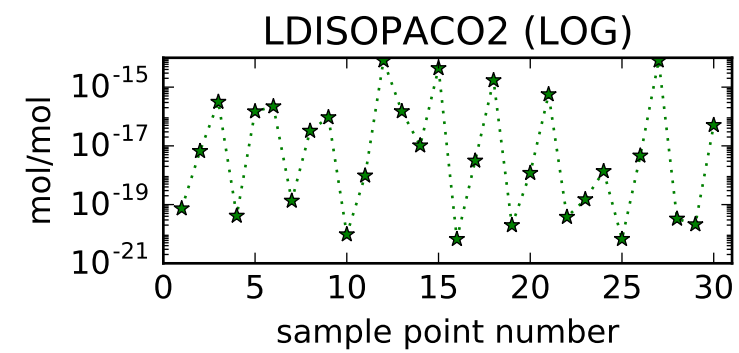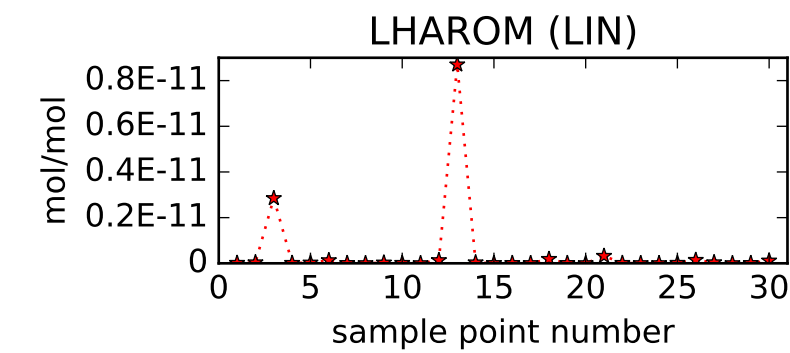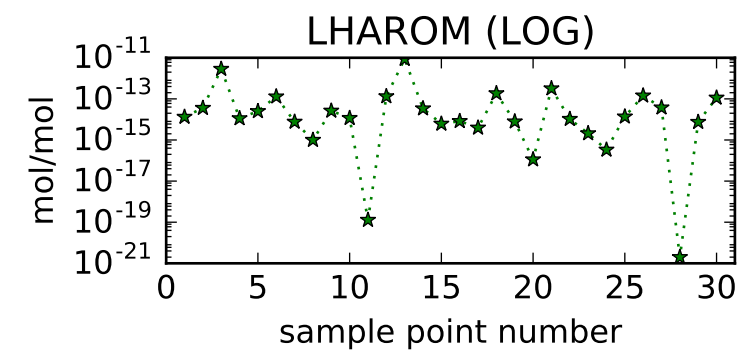

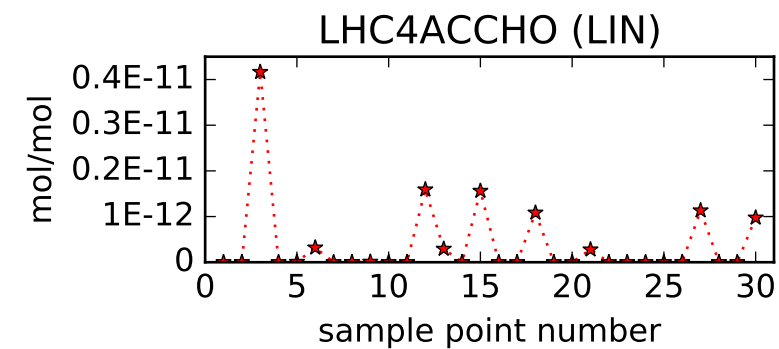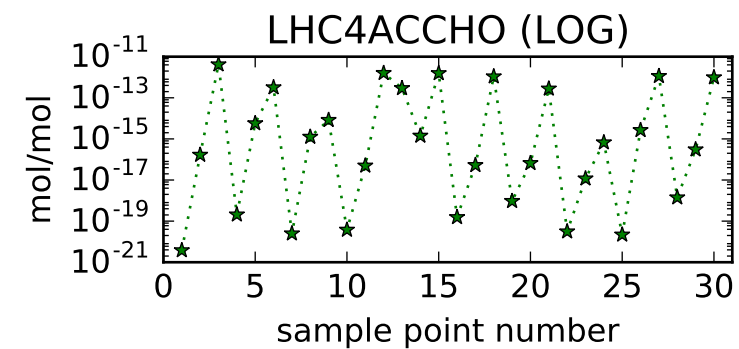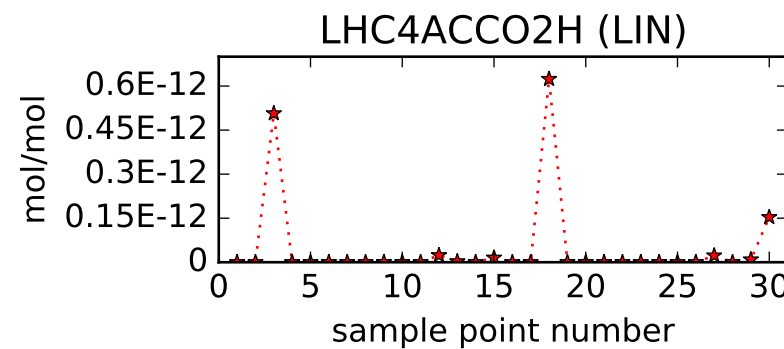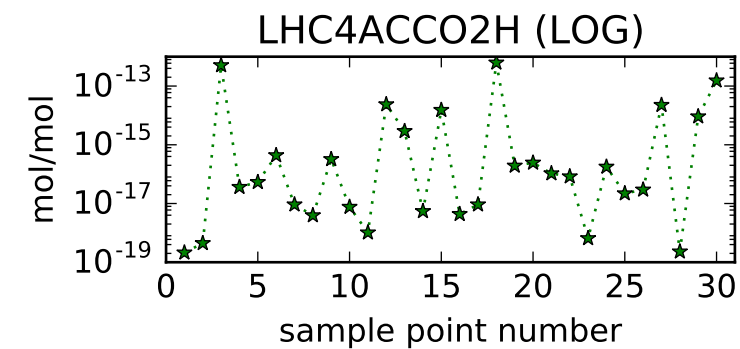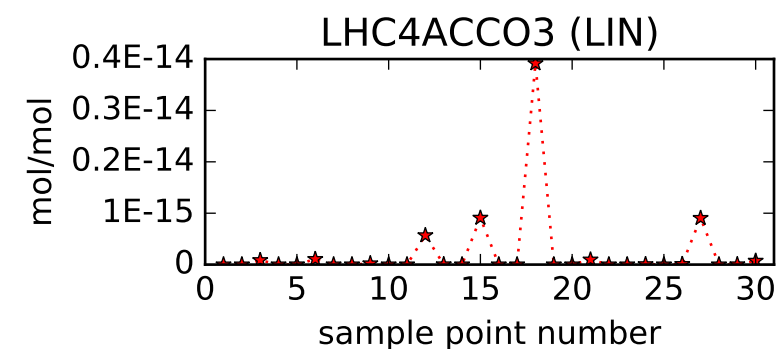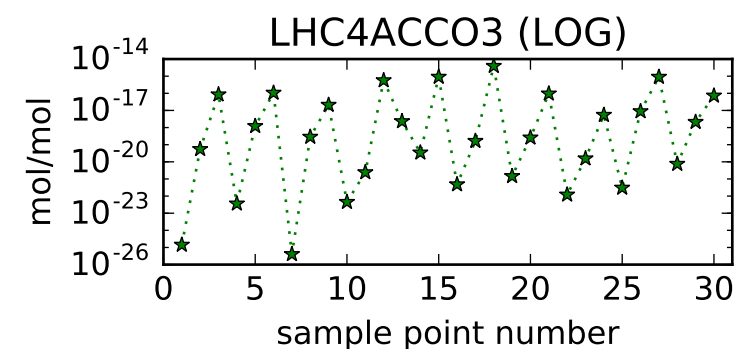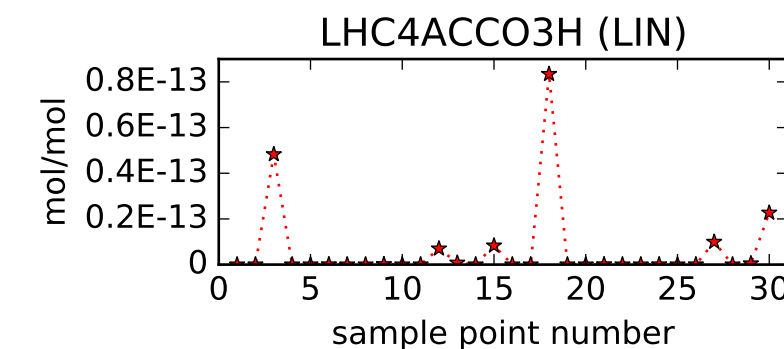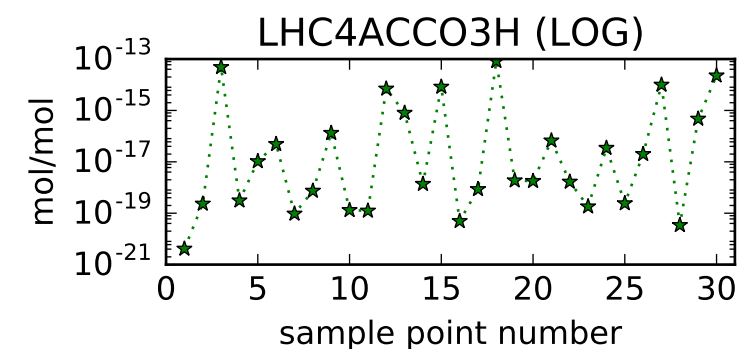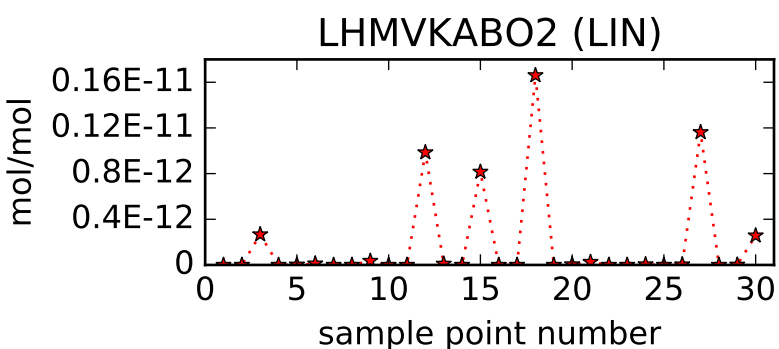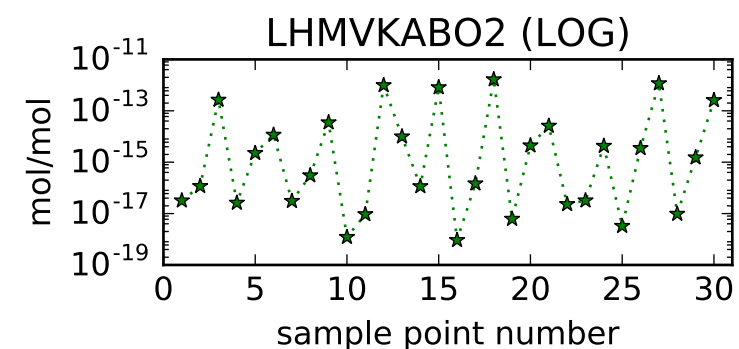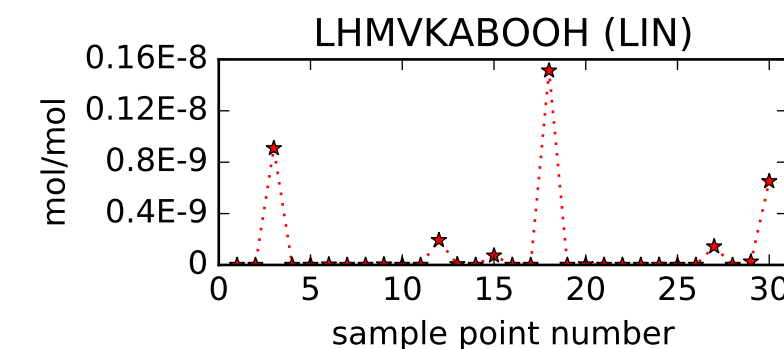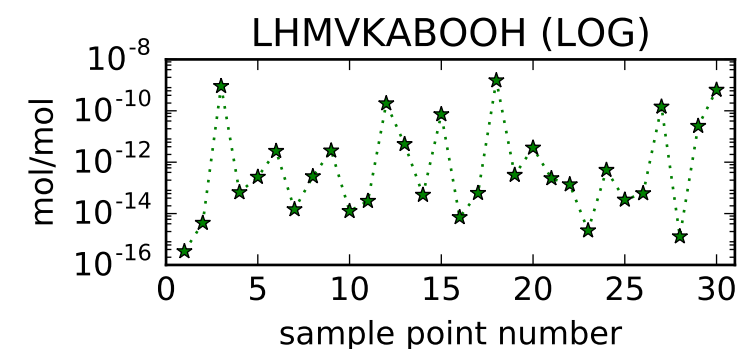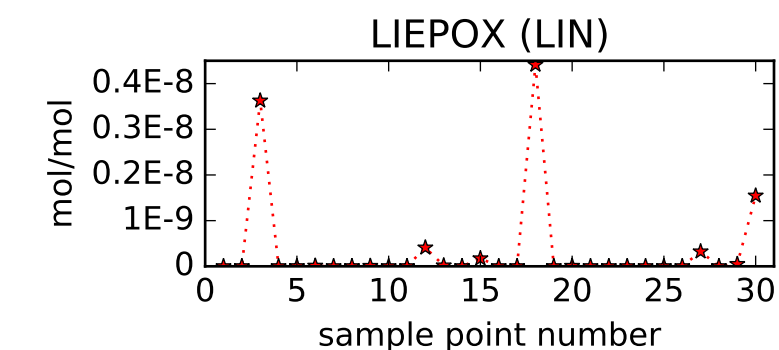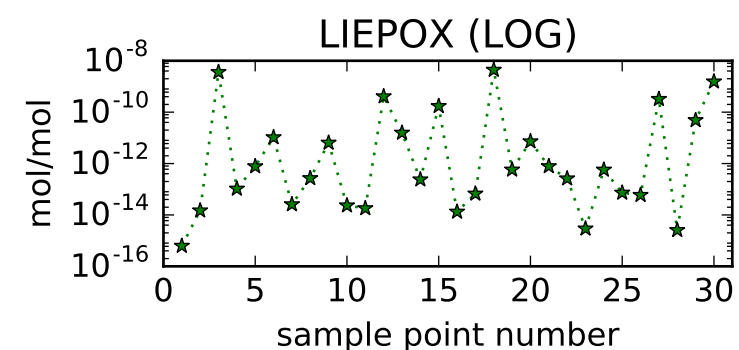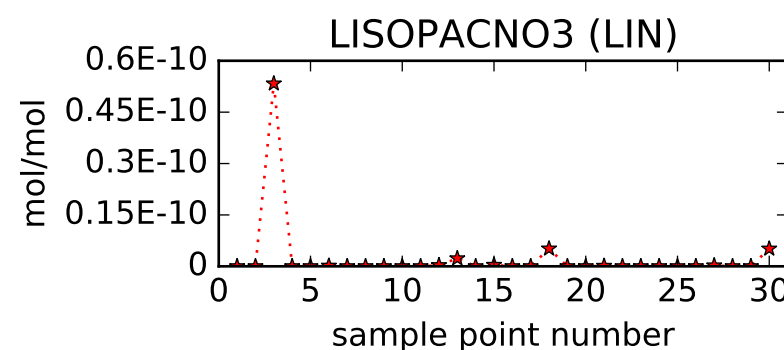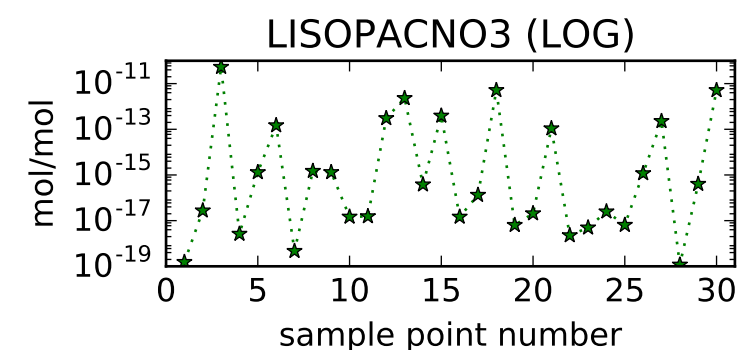

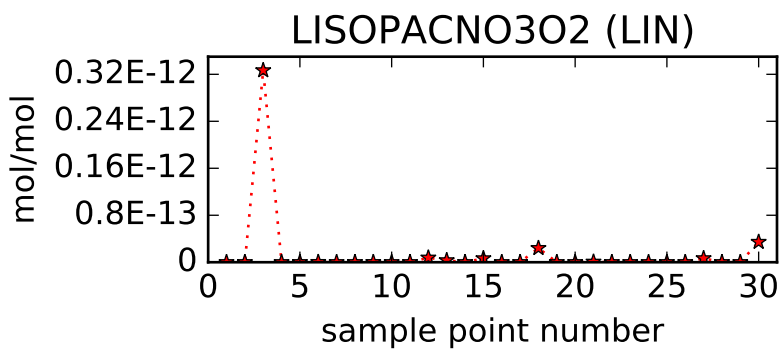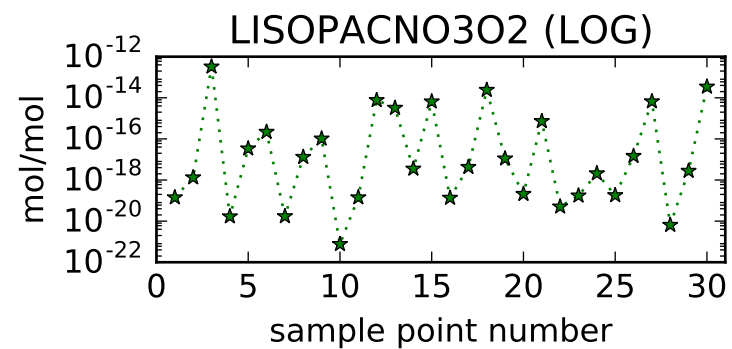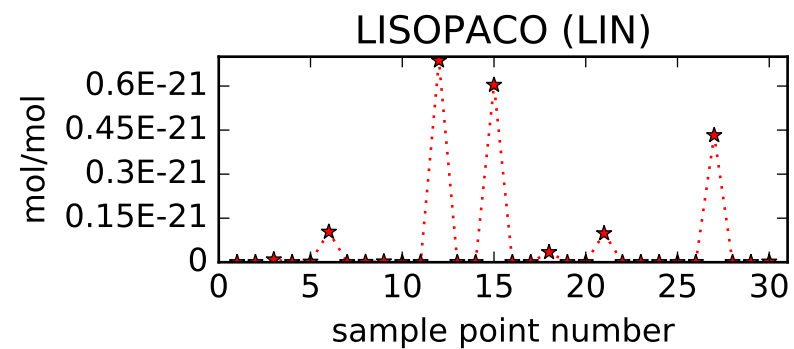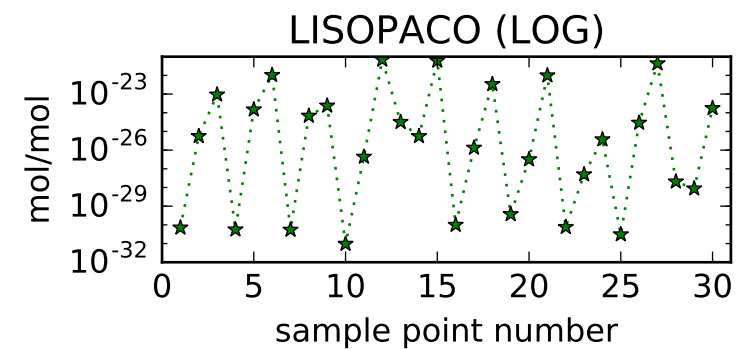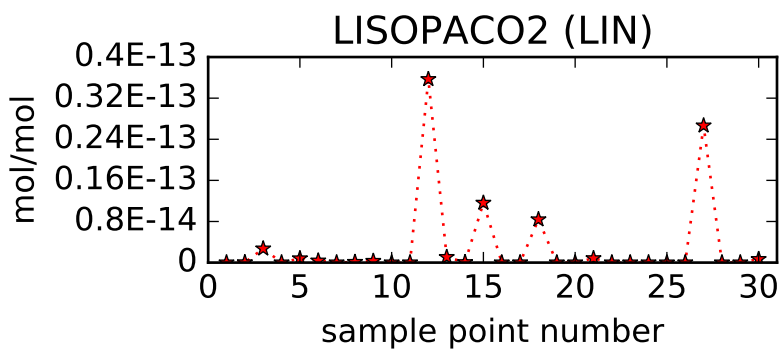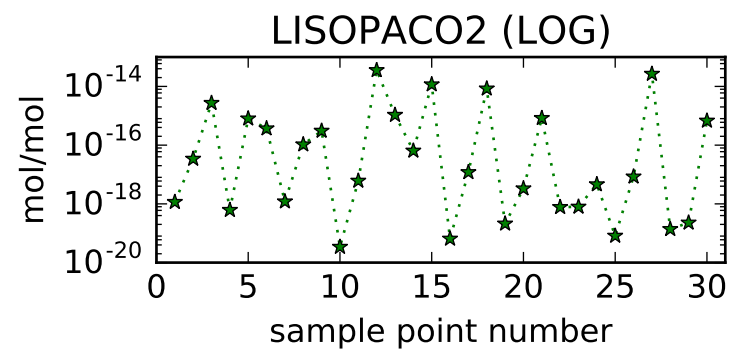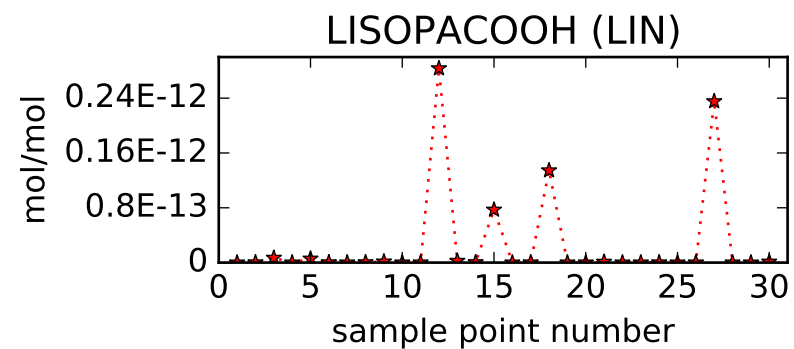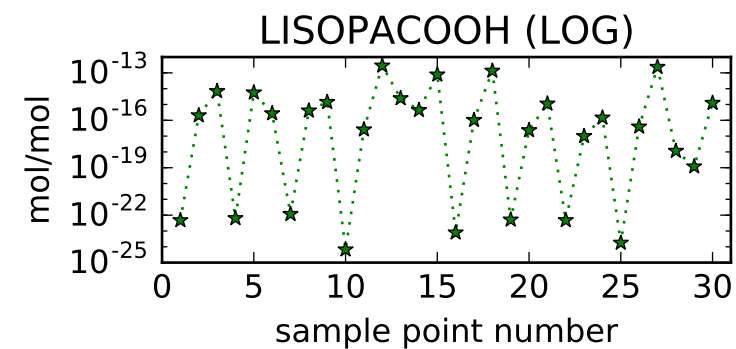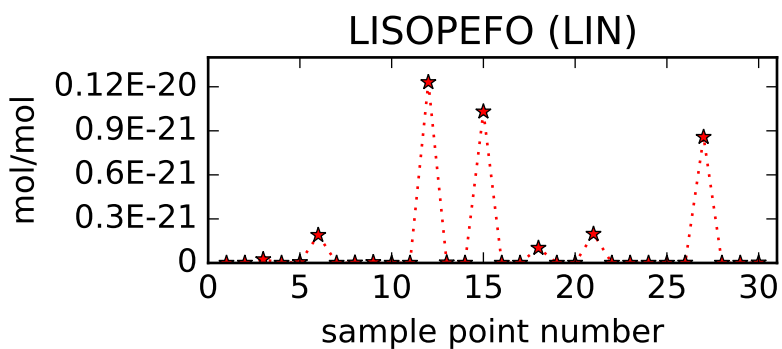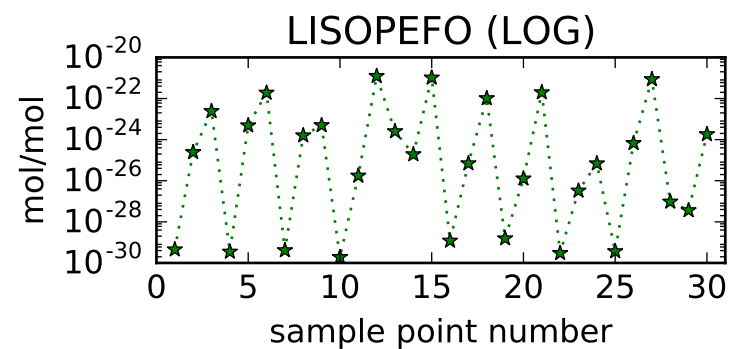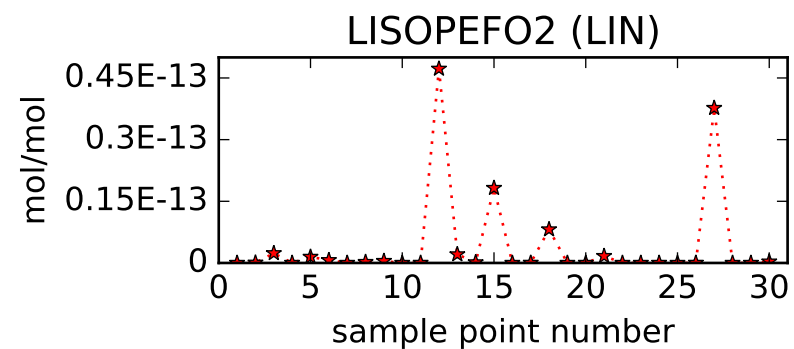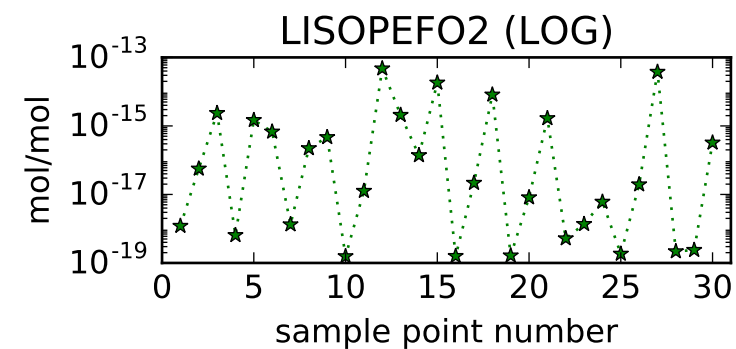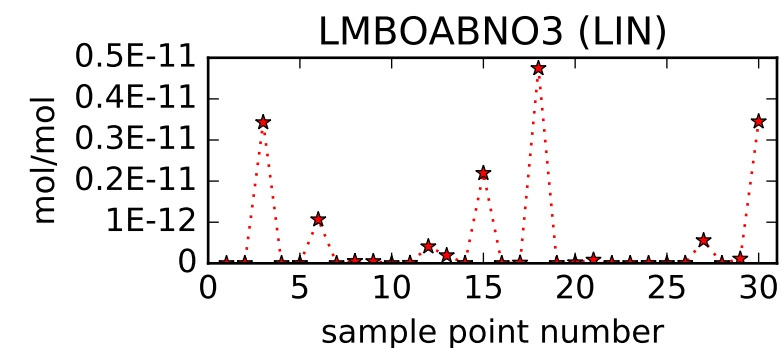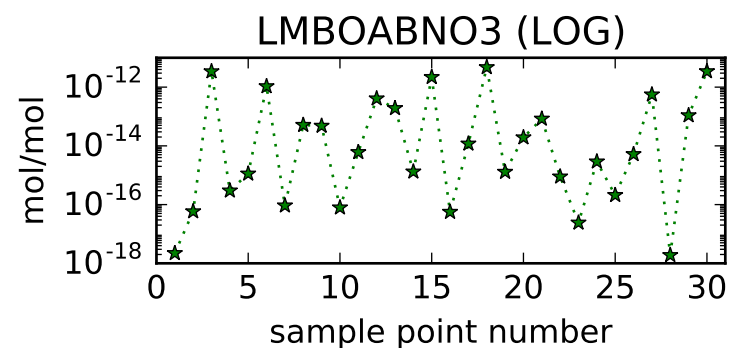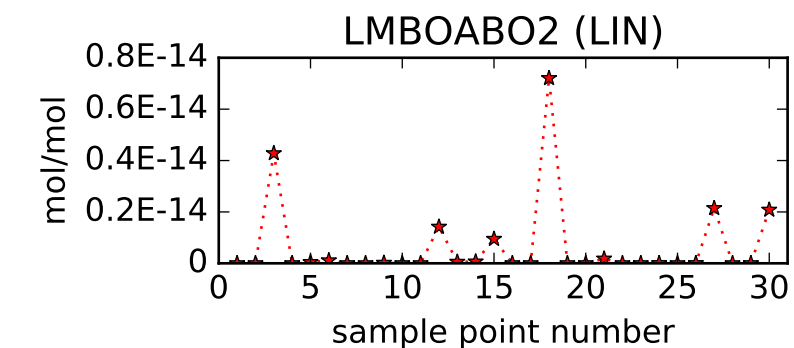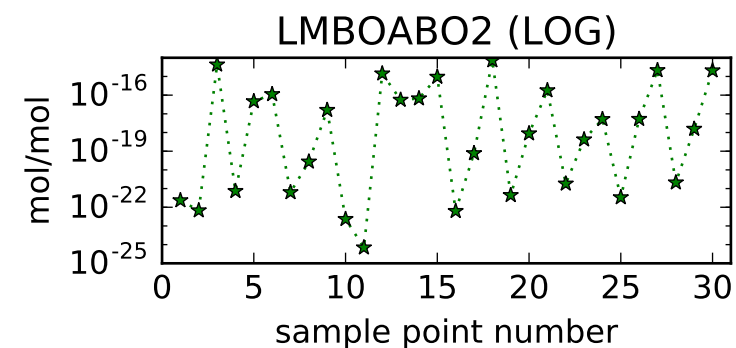

LMBOABOOH (LIN)

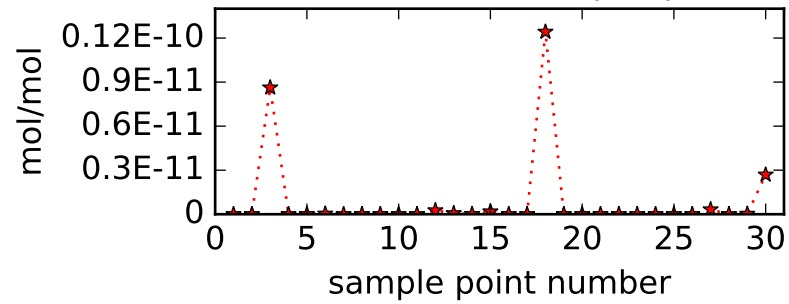

LMBOABOOH (LOG)

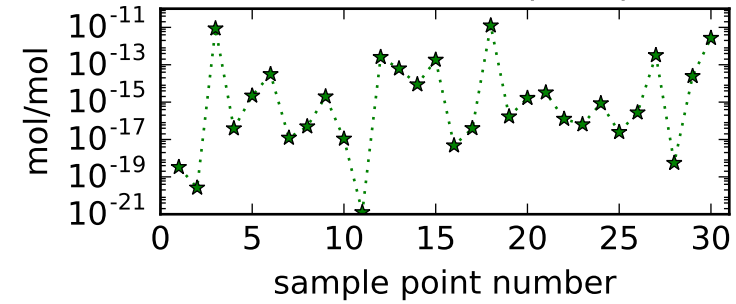

LME3FURANO2 (LIN)

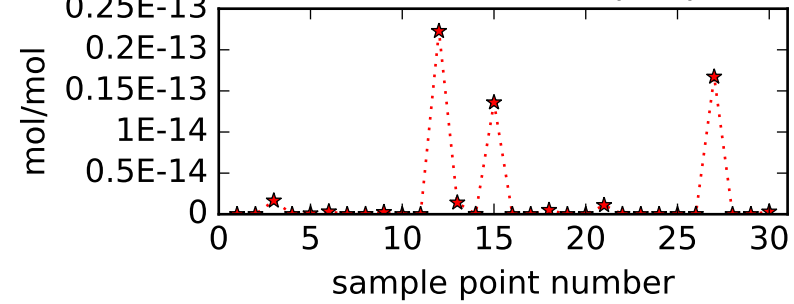

LME3FURANO2 (LOG)

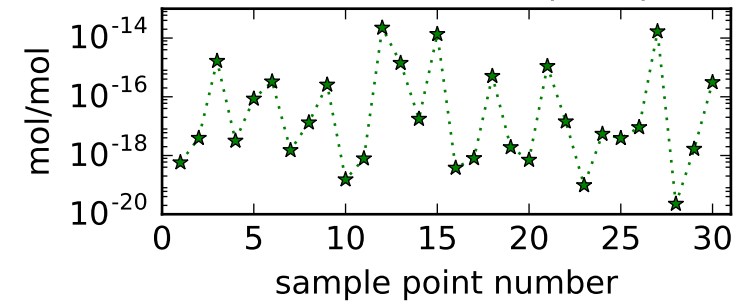

LMEKNO3 (LIN)

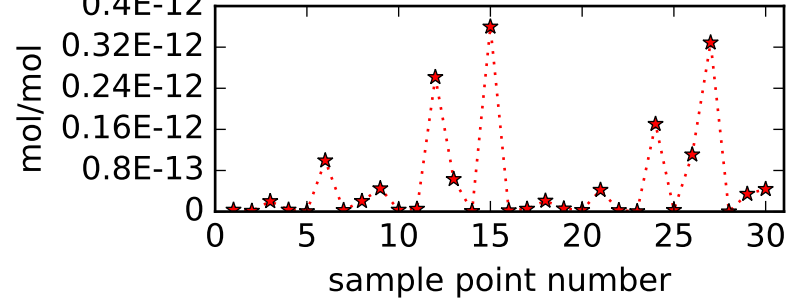

LMEKNO3 (LOG)

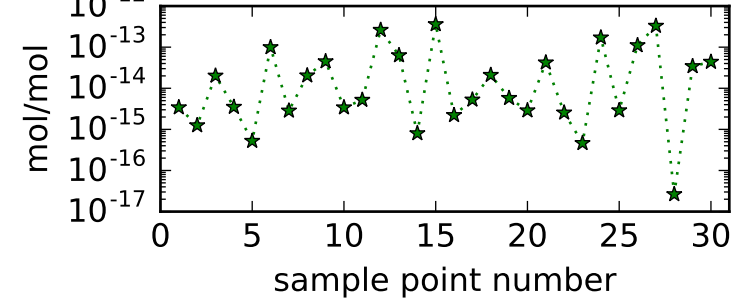

LMEKO2 (LIN)

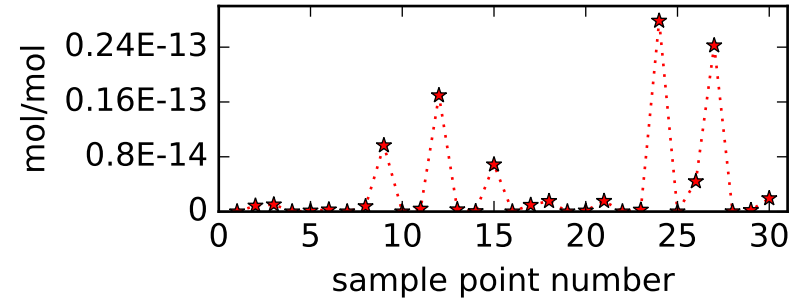

LMEKO2 (LOG)

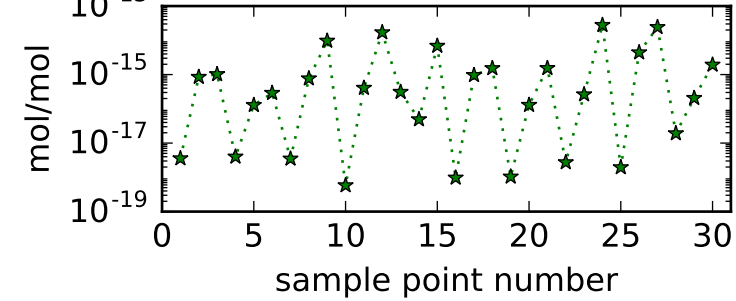

LMEKOOH (LIN)

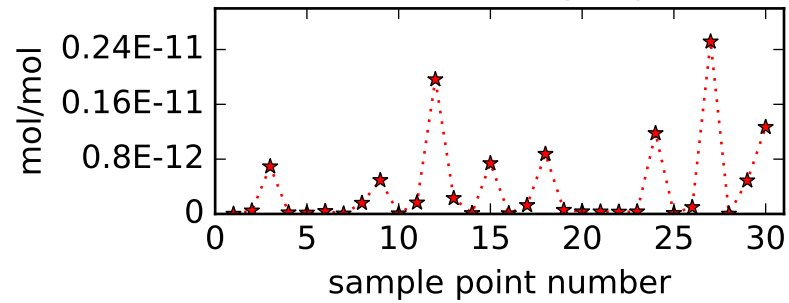

LMEKOOH (LOG)

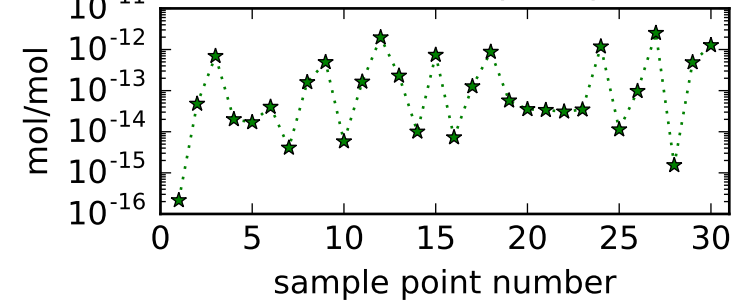

LNAPINABO2 (LIN)

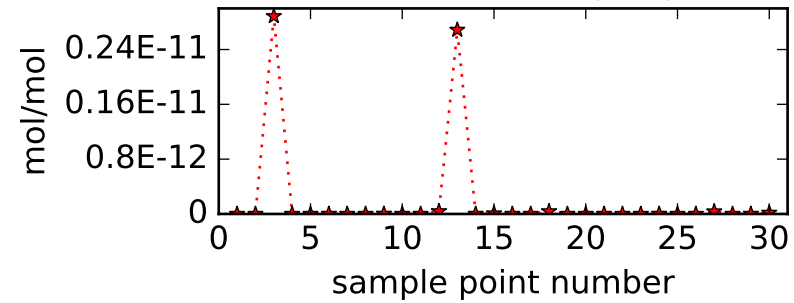

LNAPINABO2 (LOG)

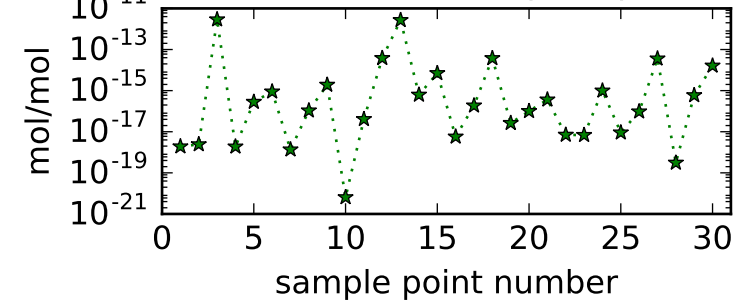

LNAPINABOOH (LIN)

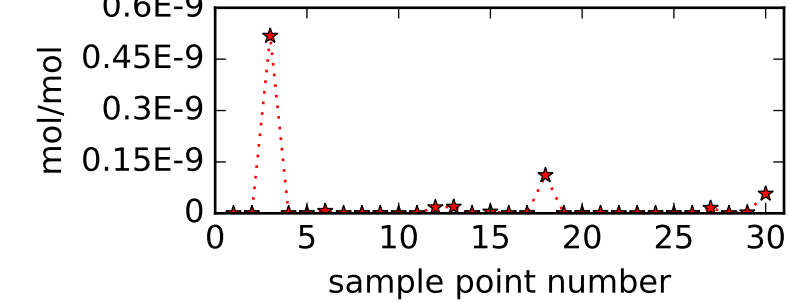

LNAPINABOOH (LOG)

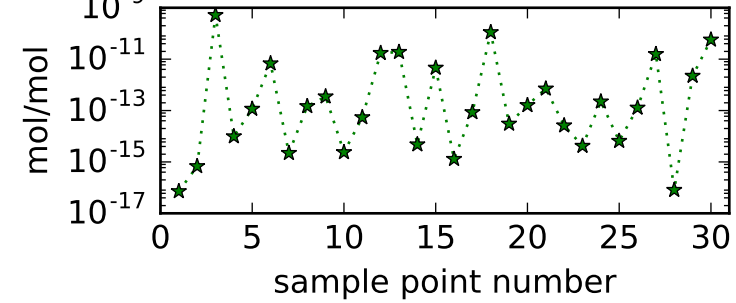

LNBPINABO2 (LIN)

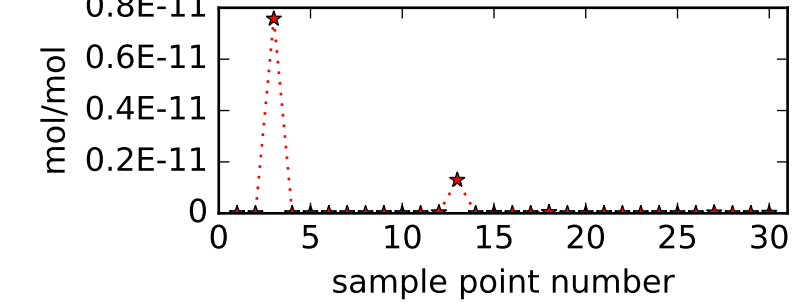

LNBPINABO2 (LOG)

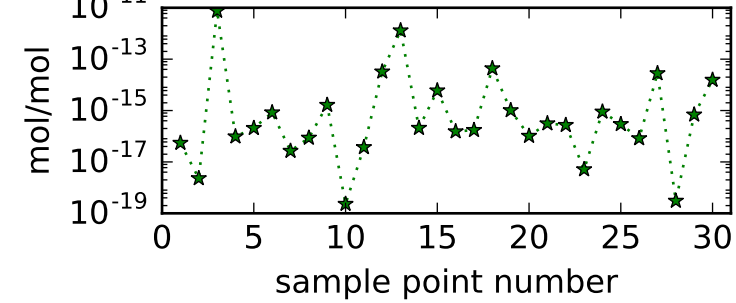

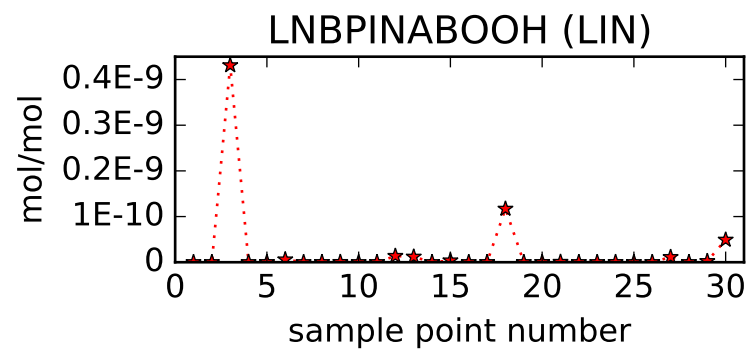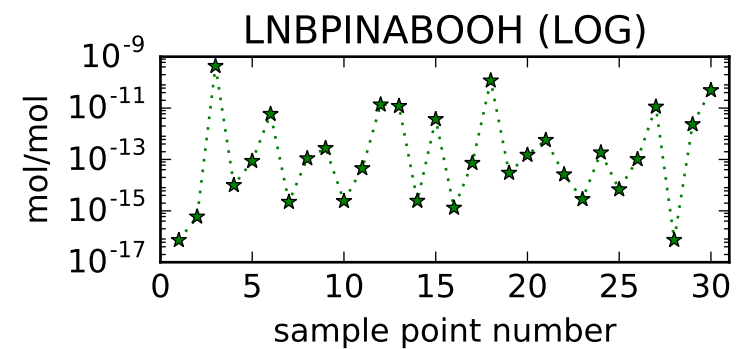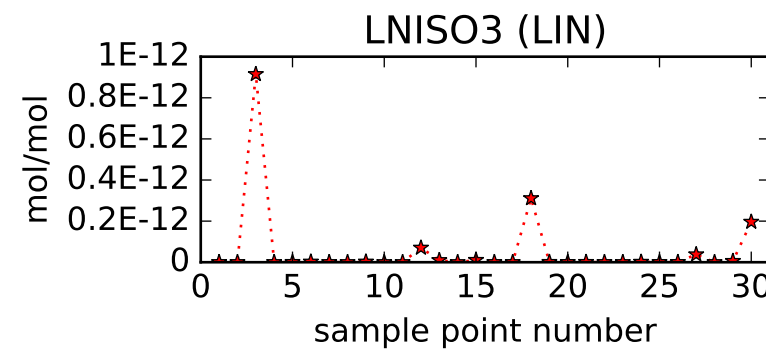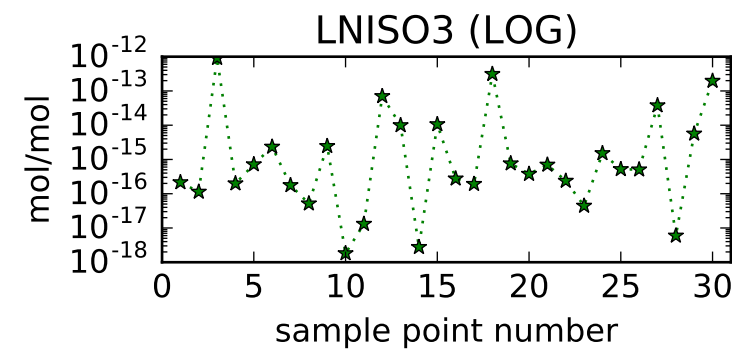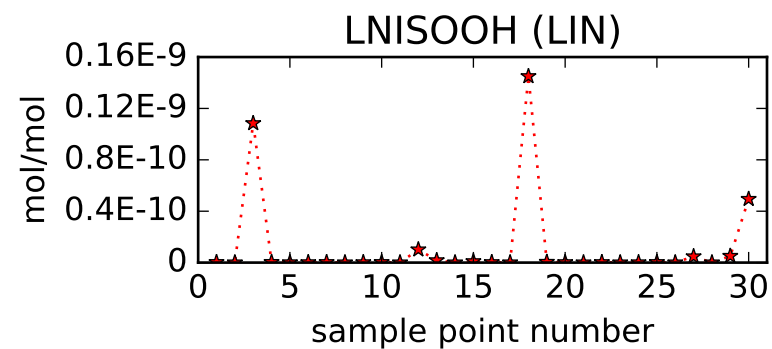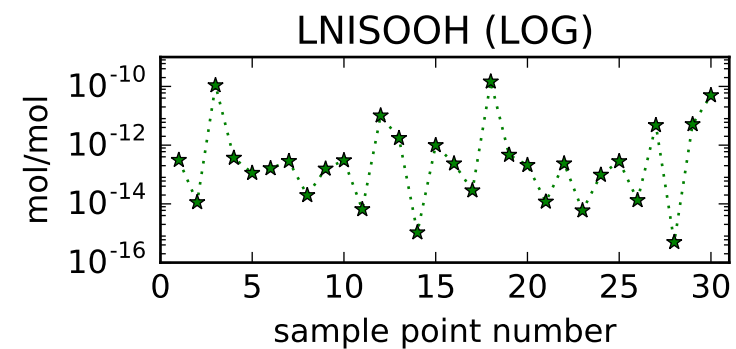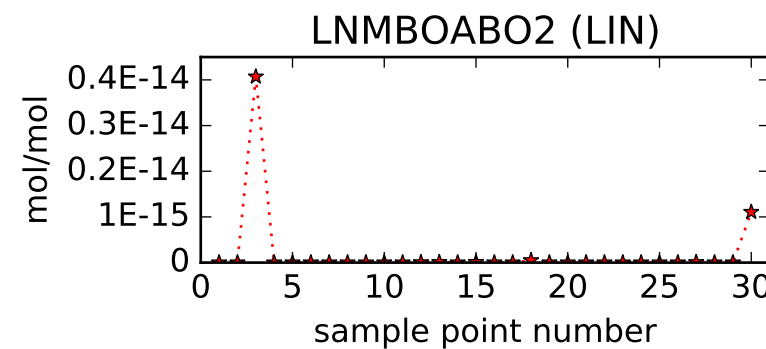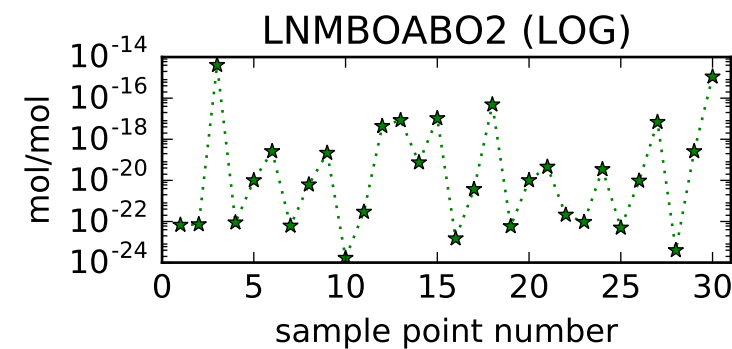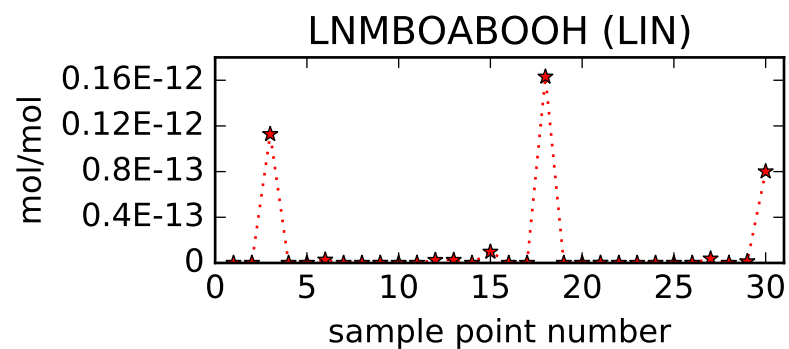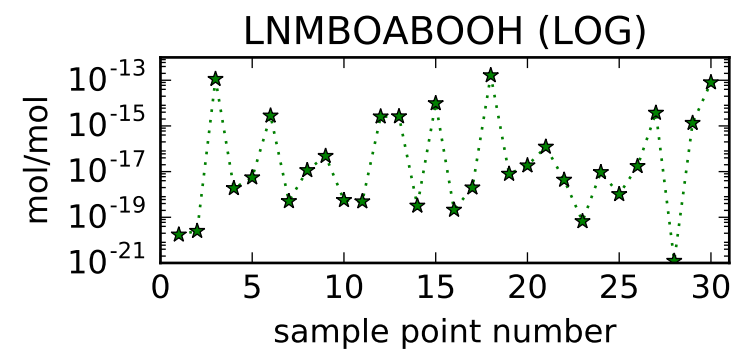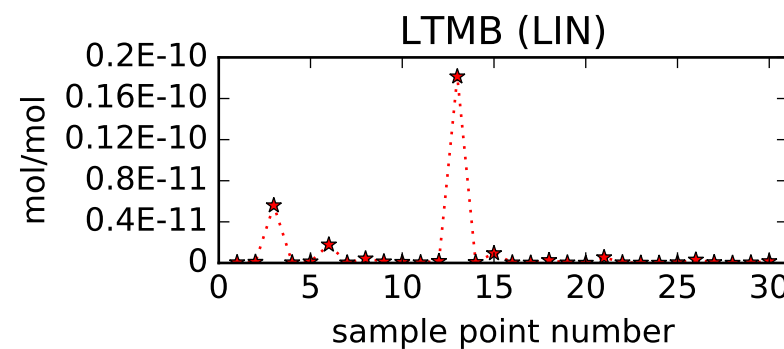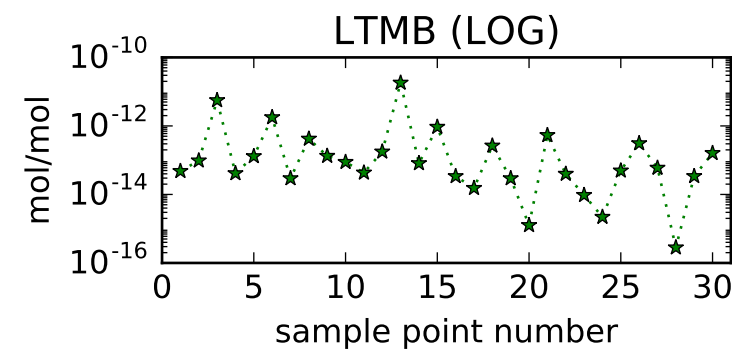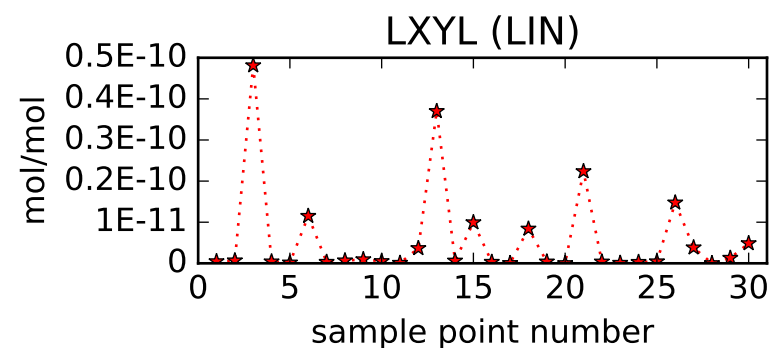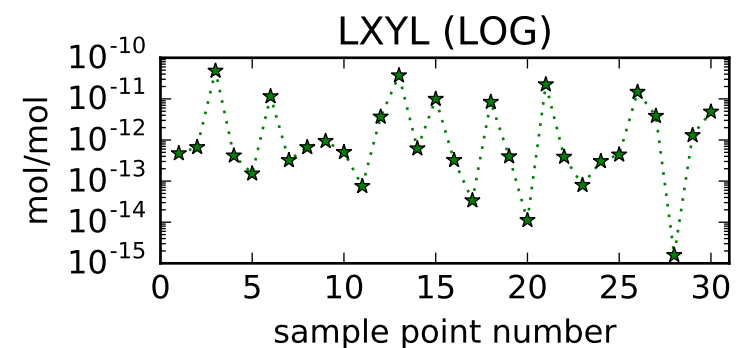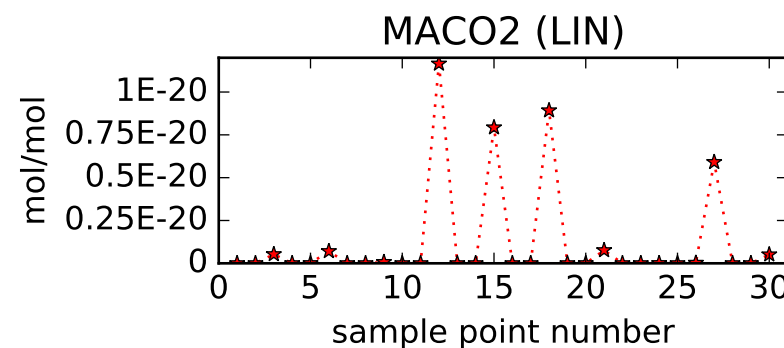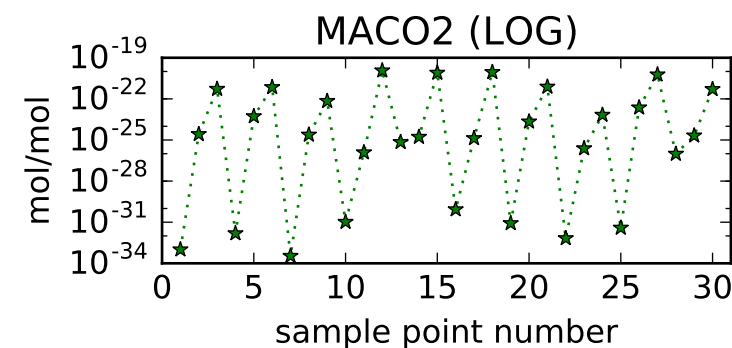



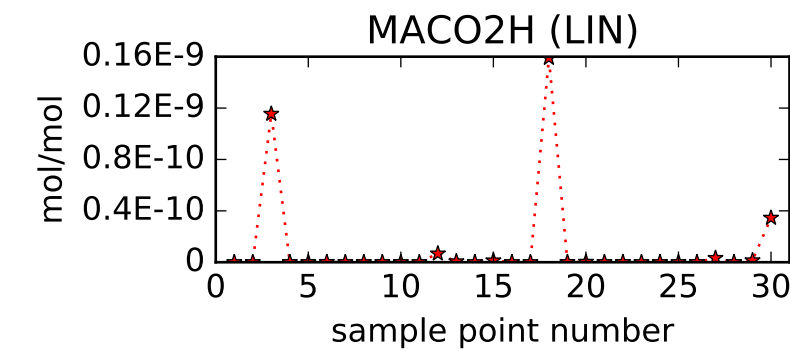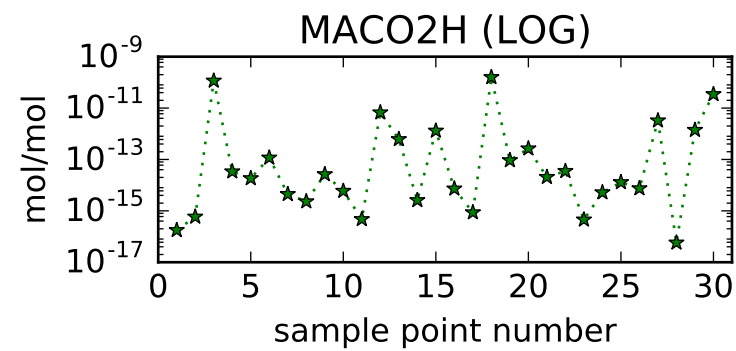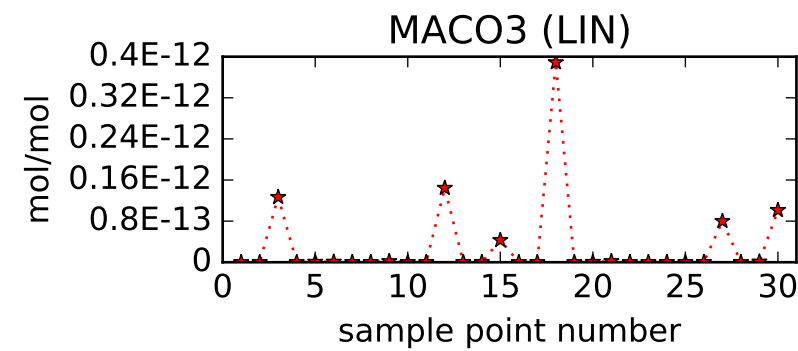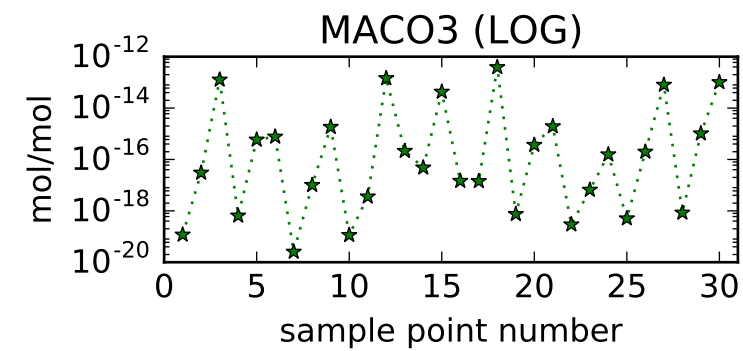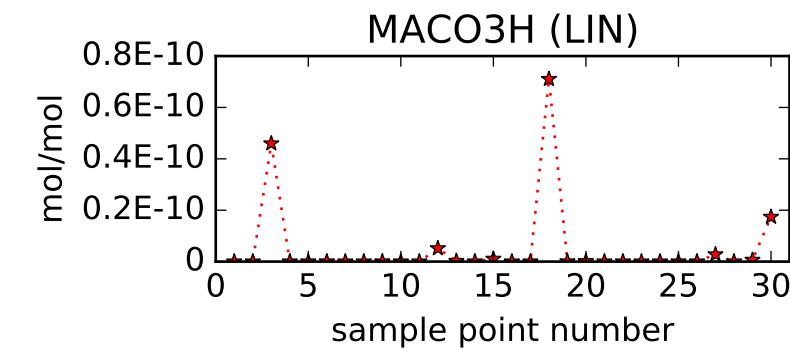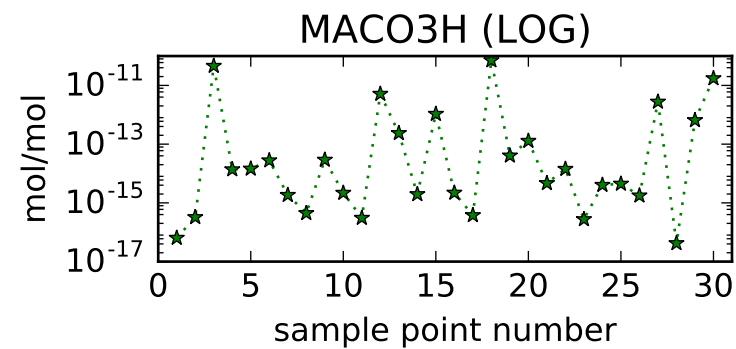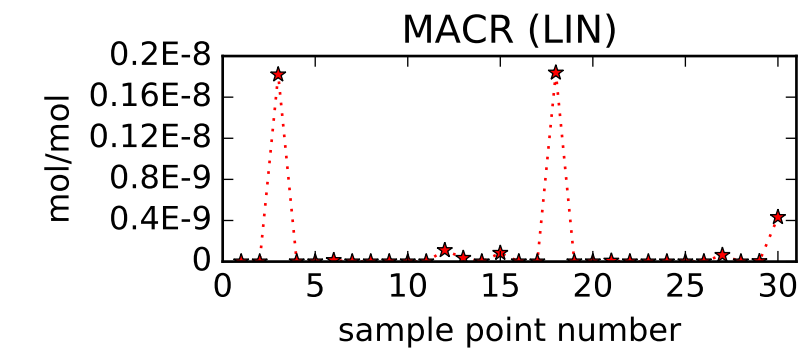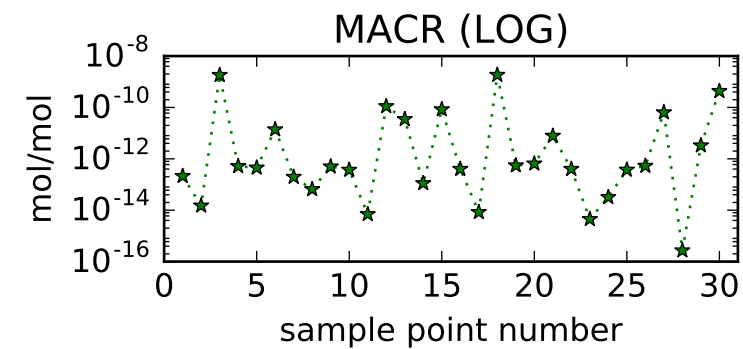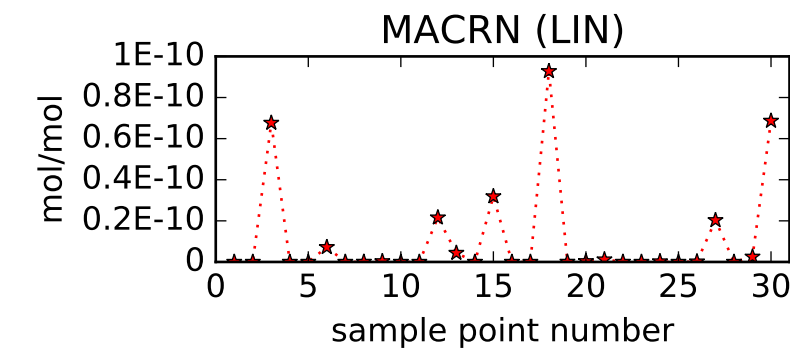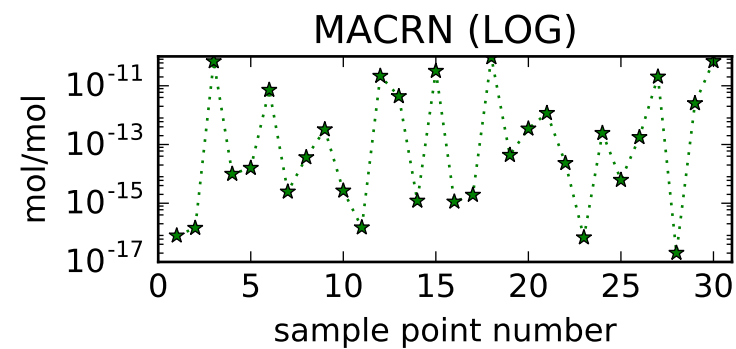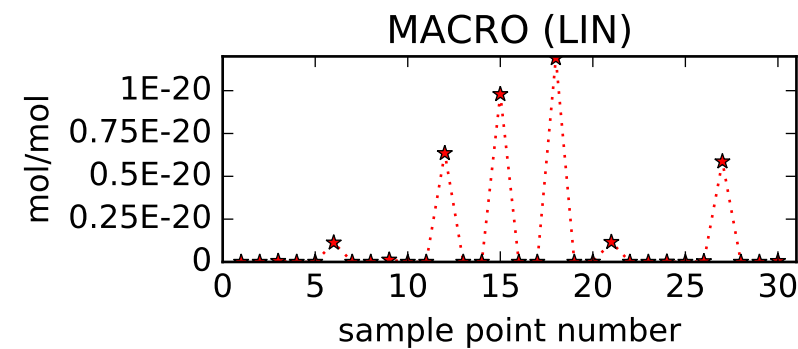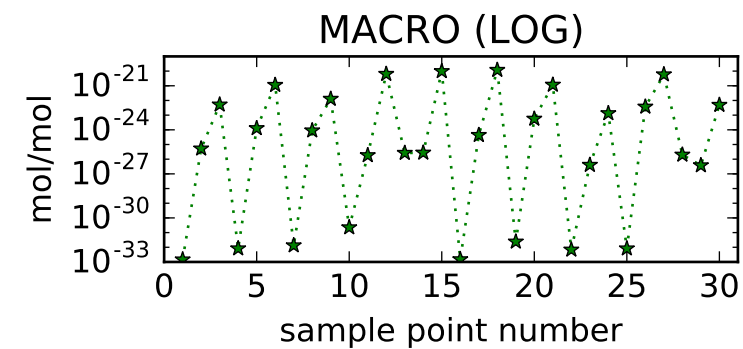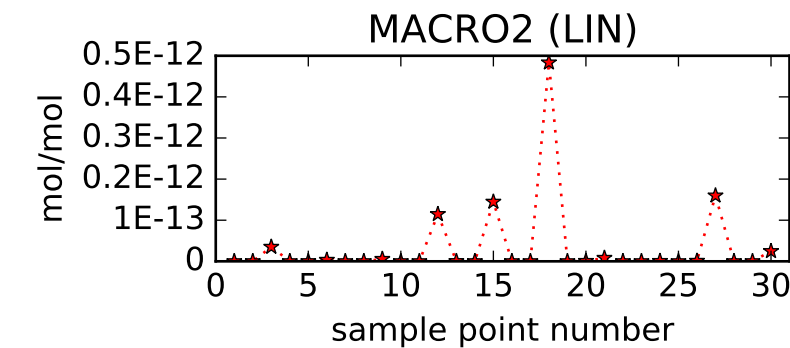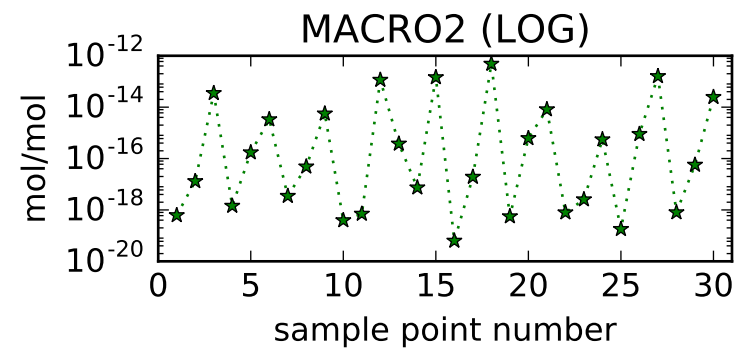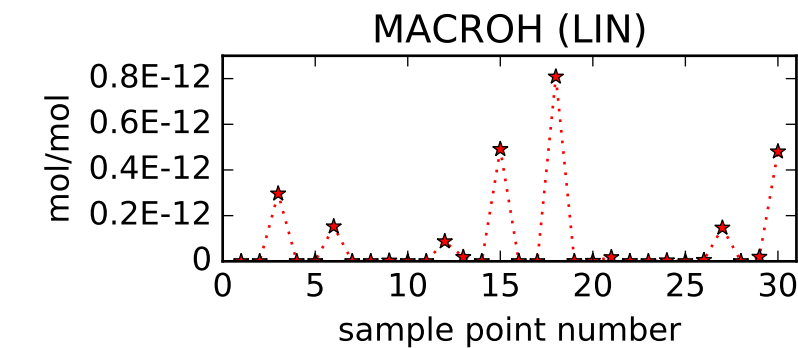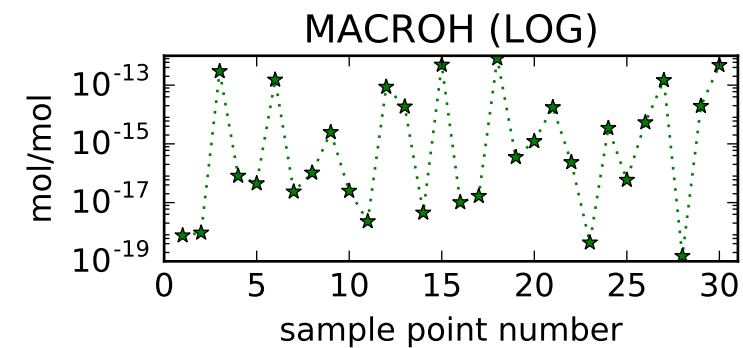

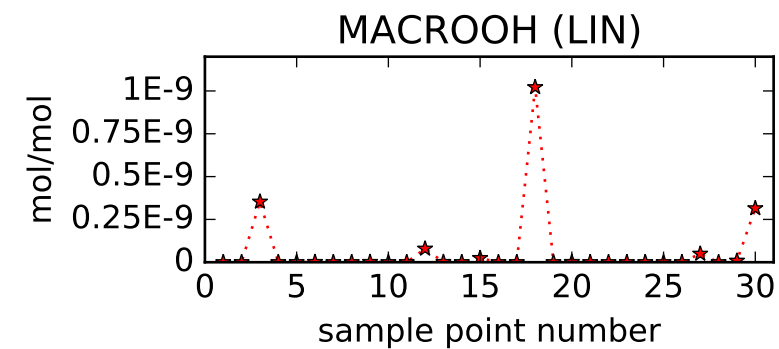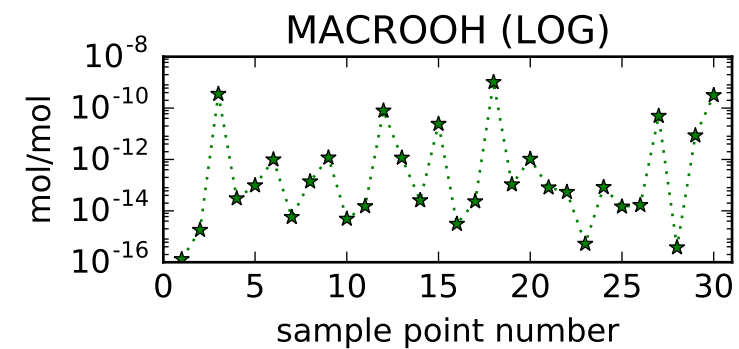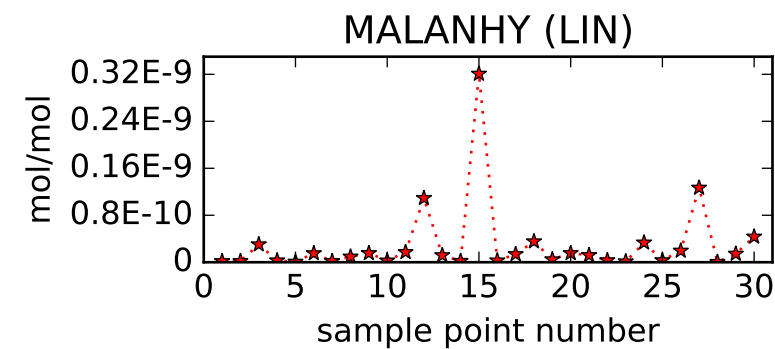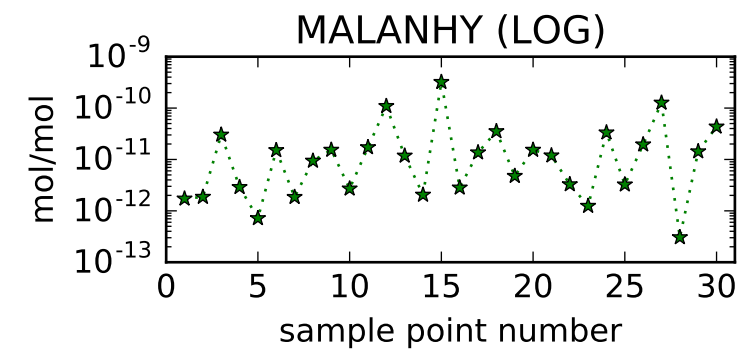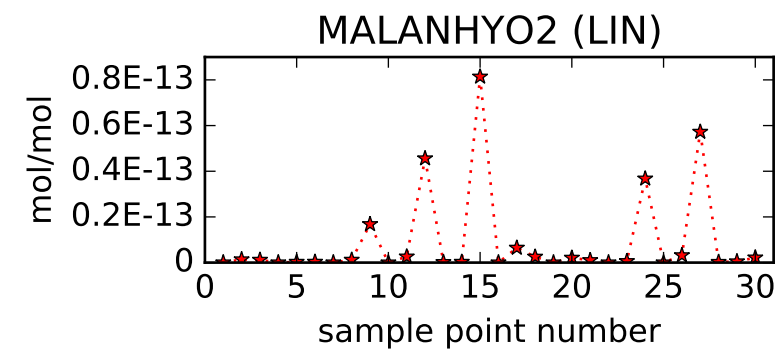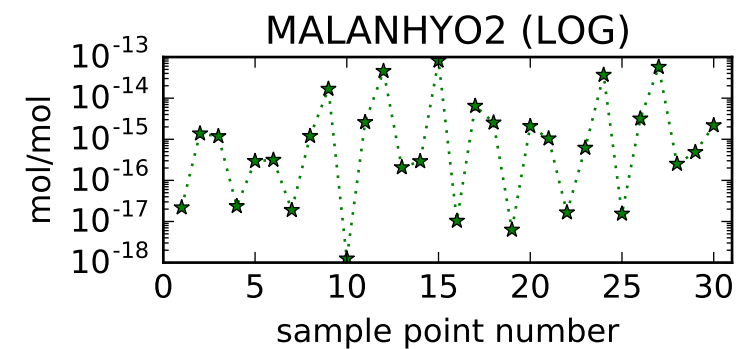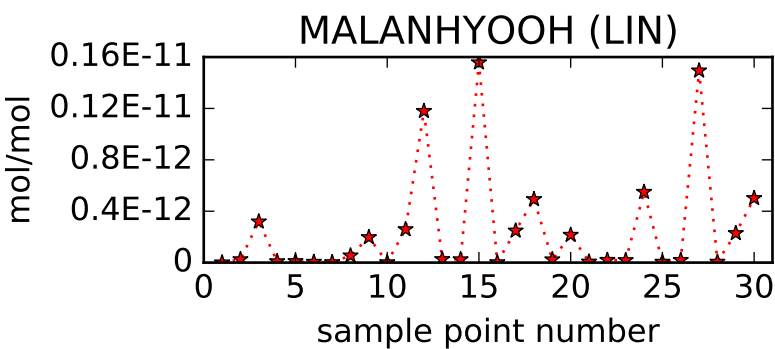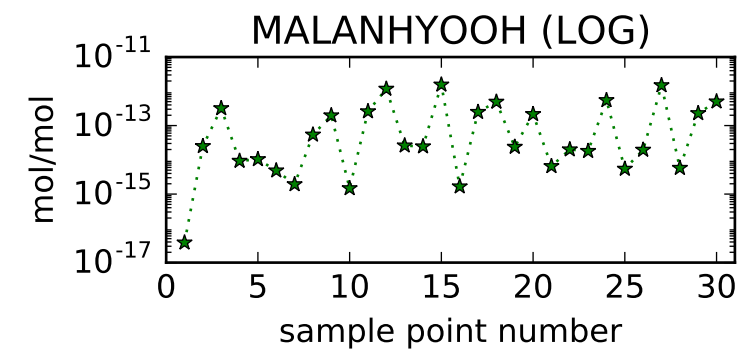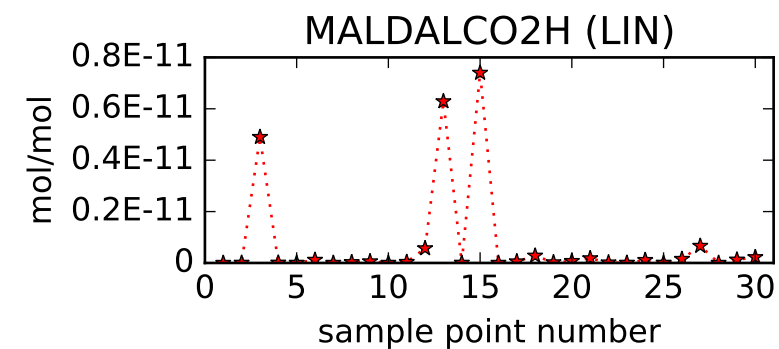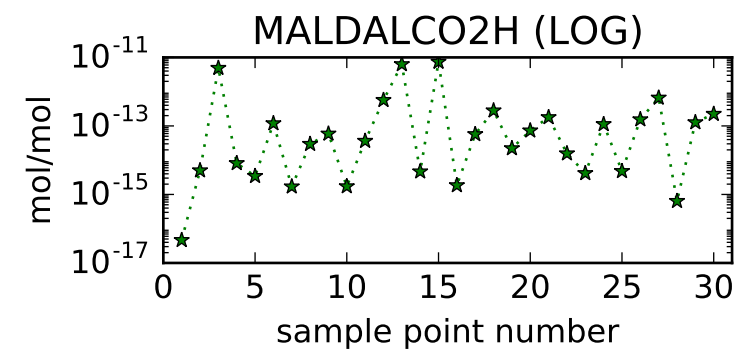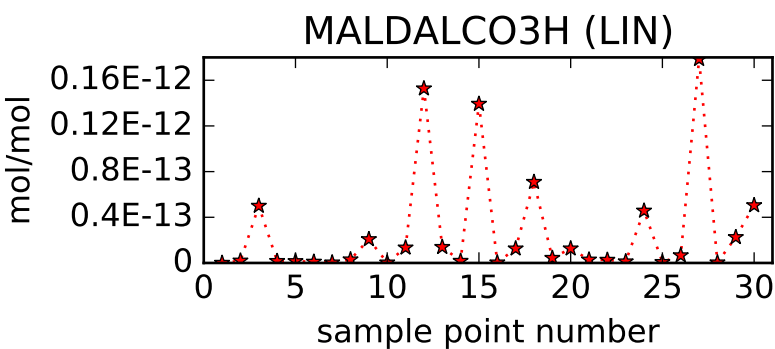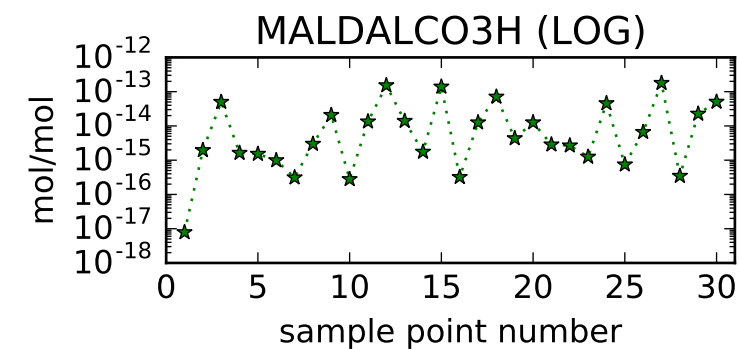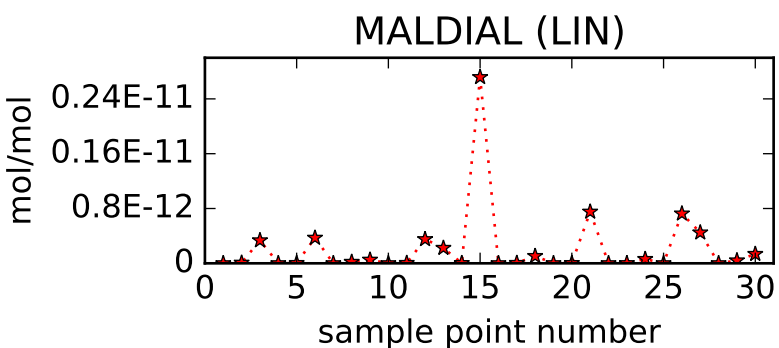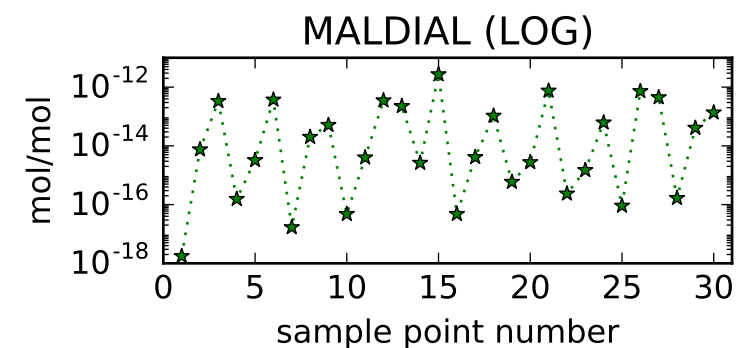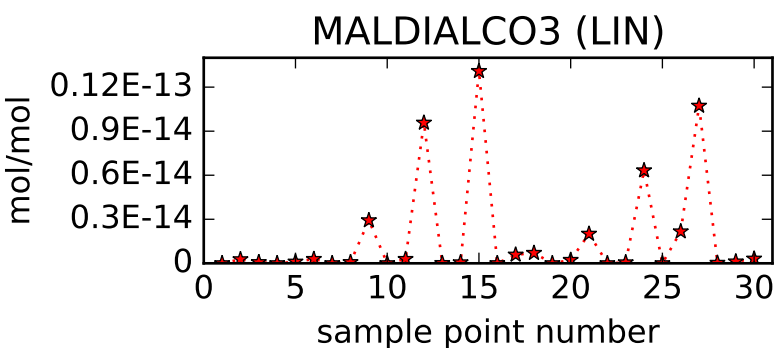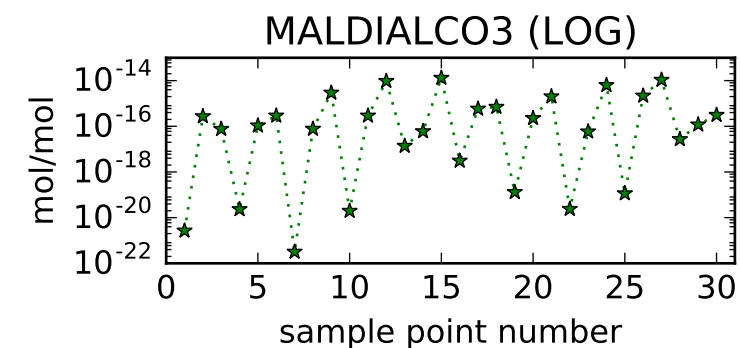

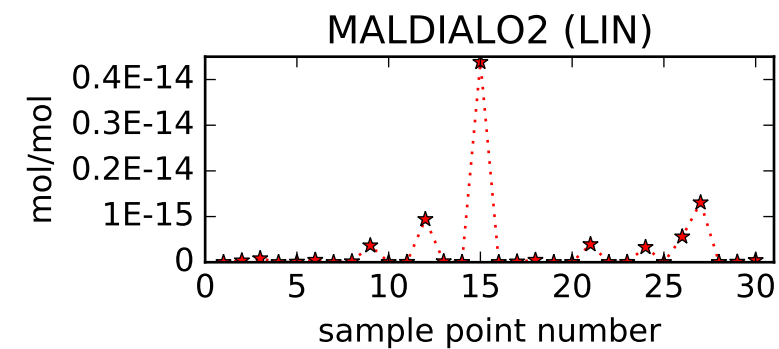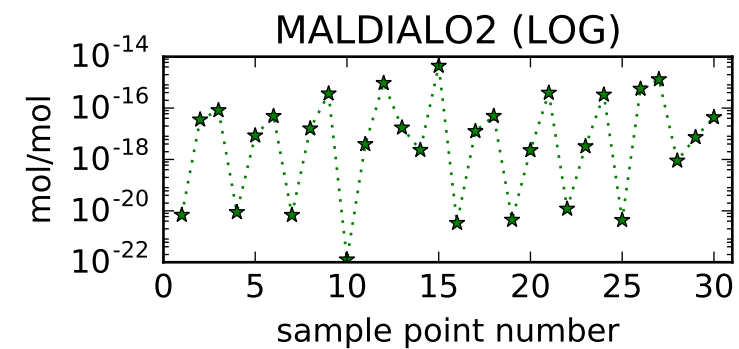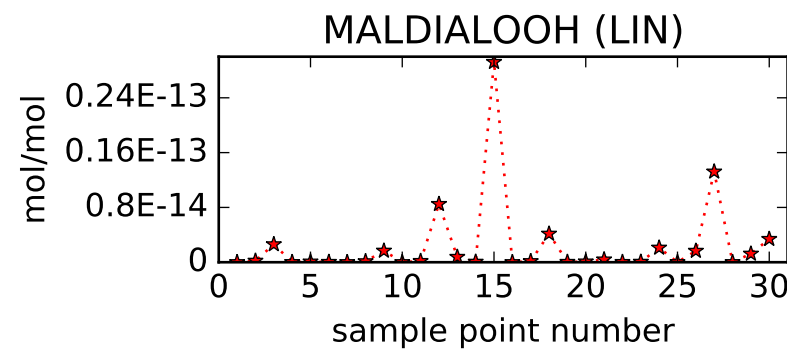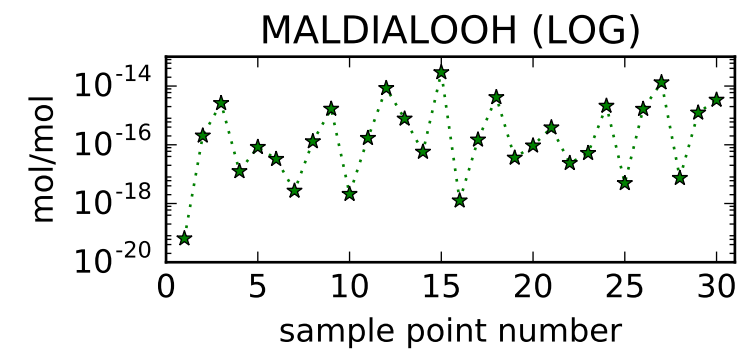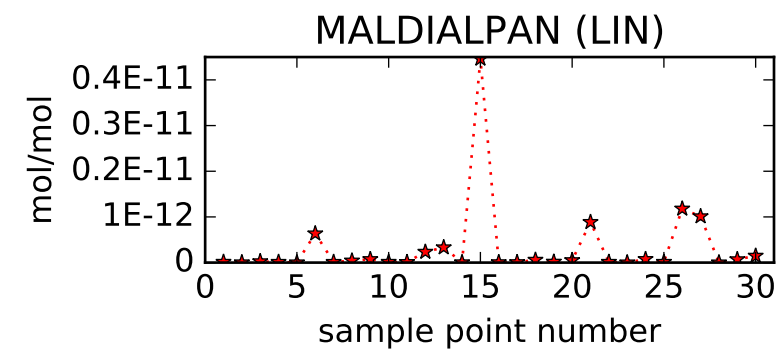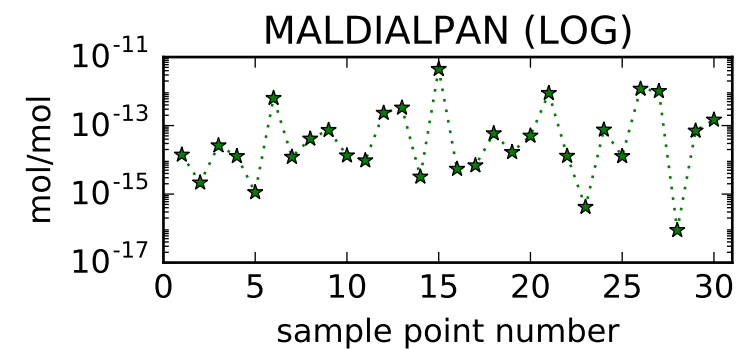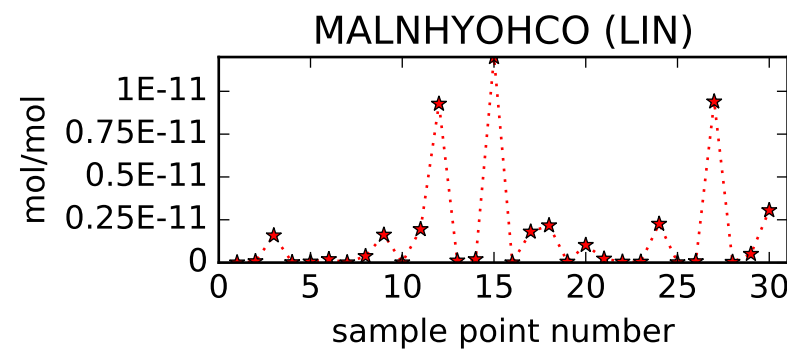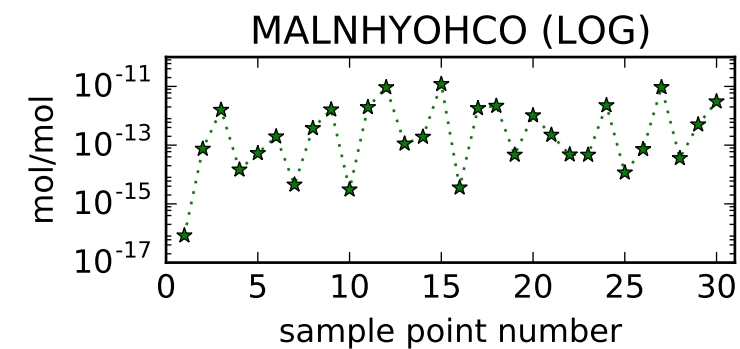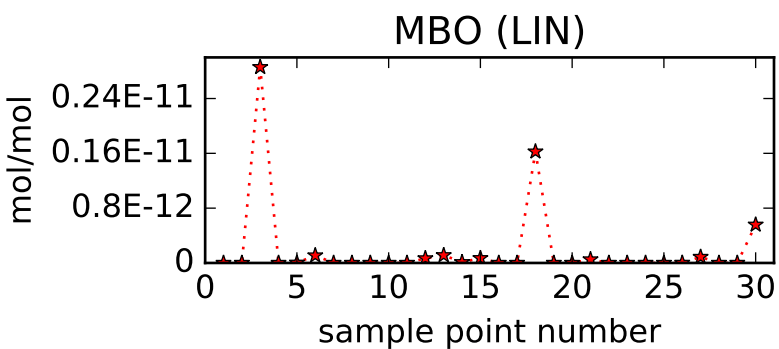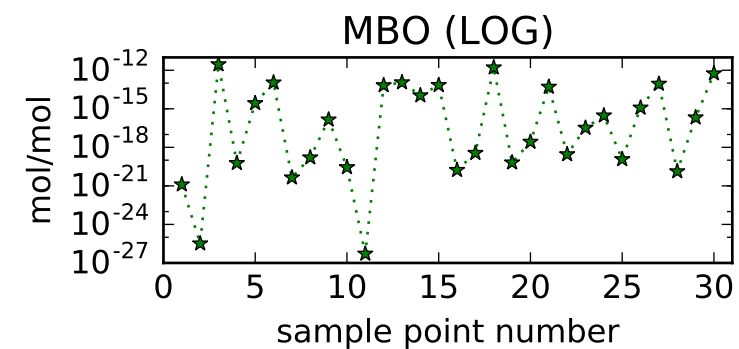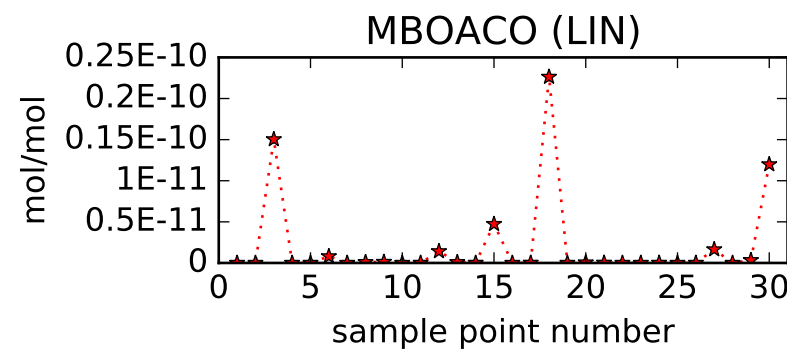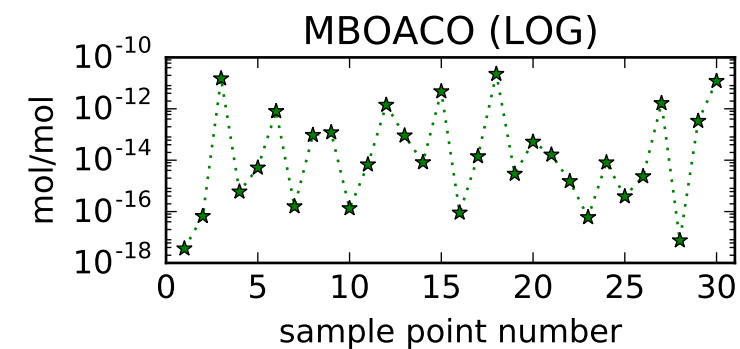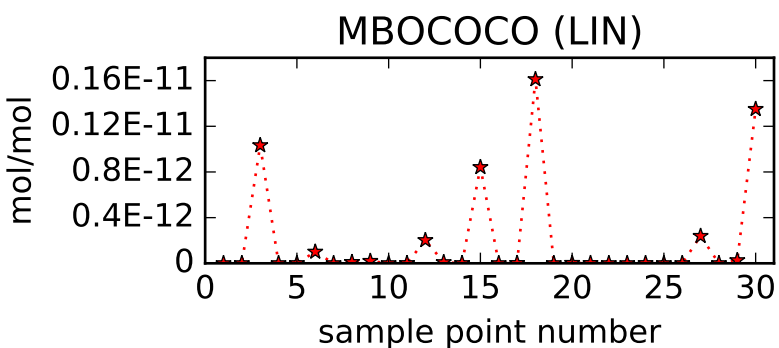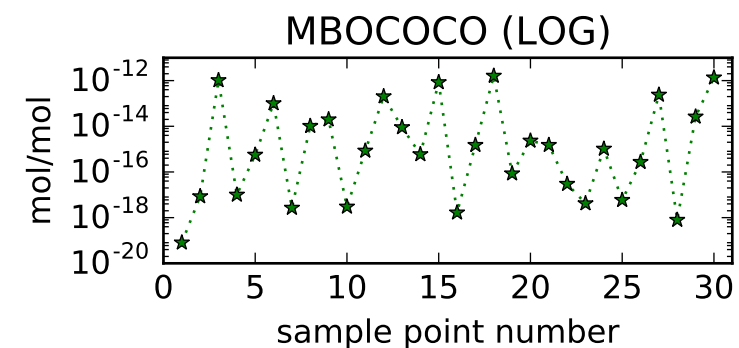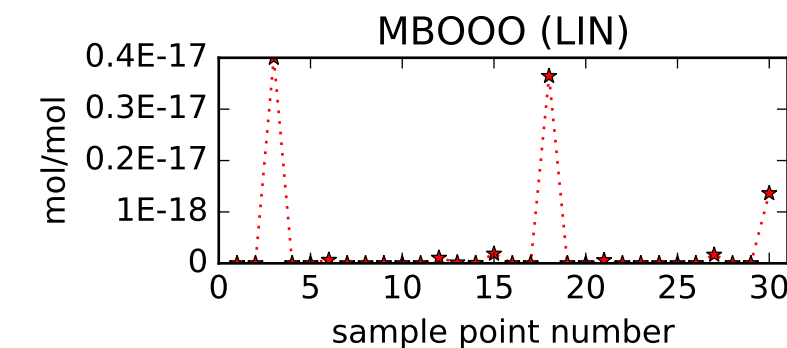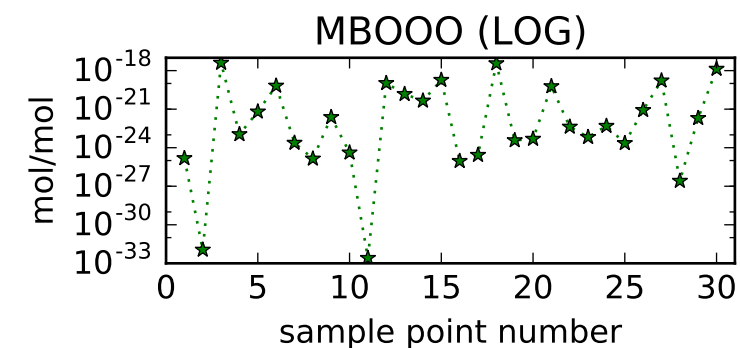

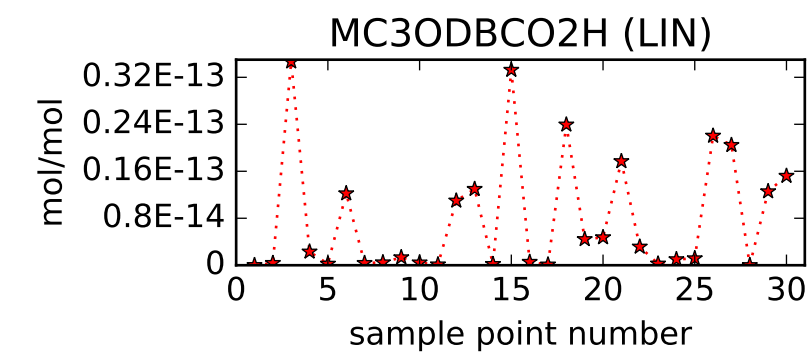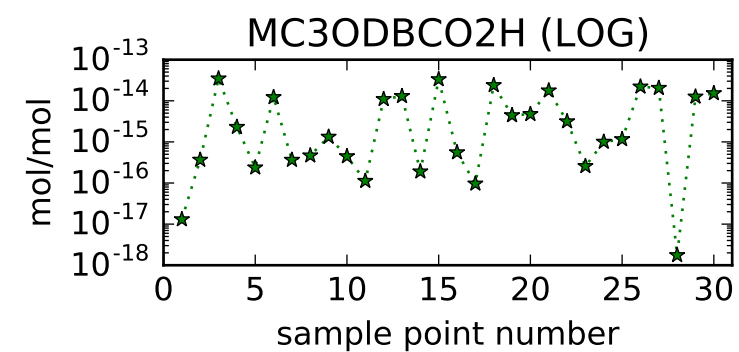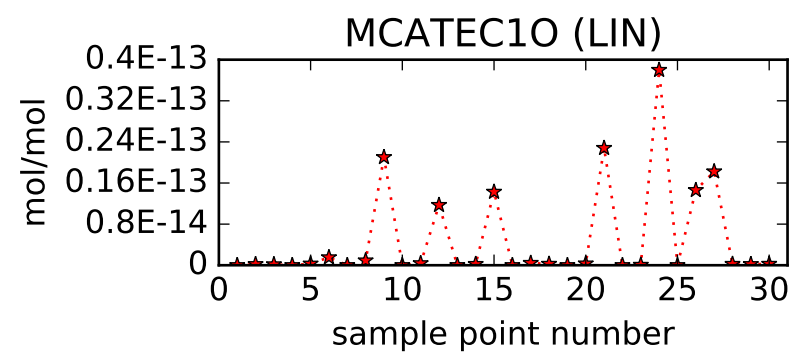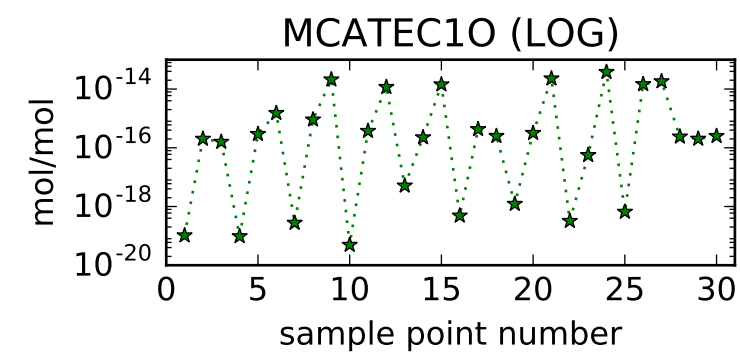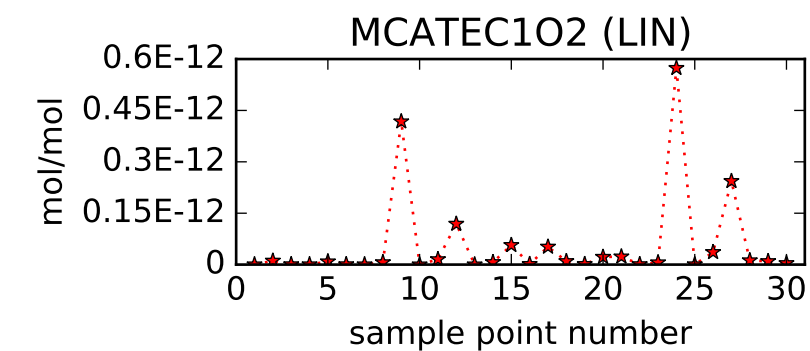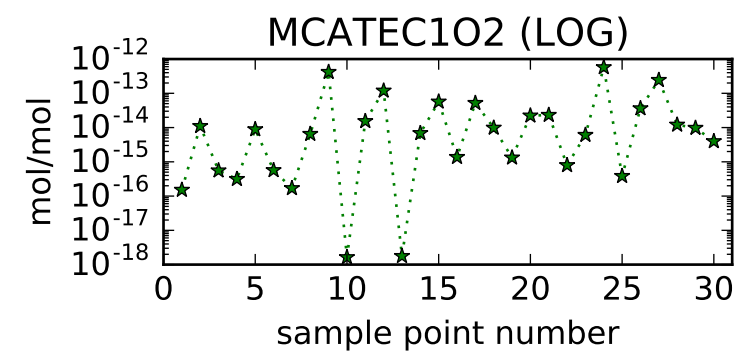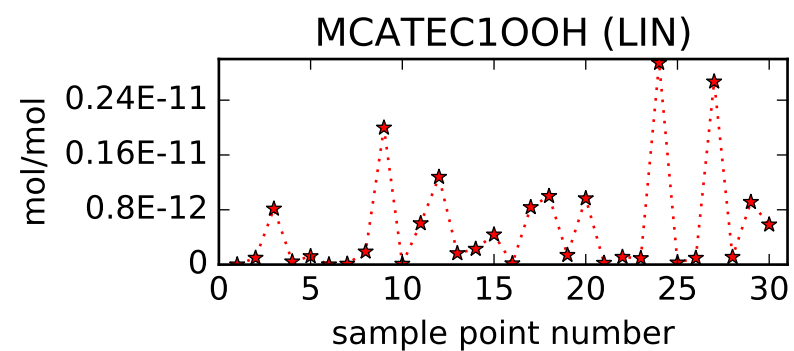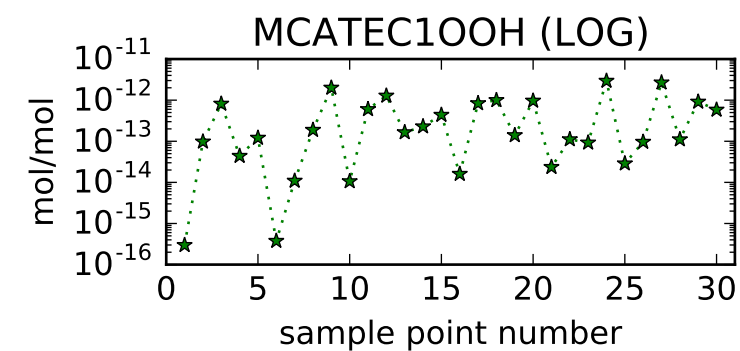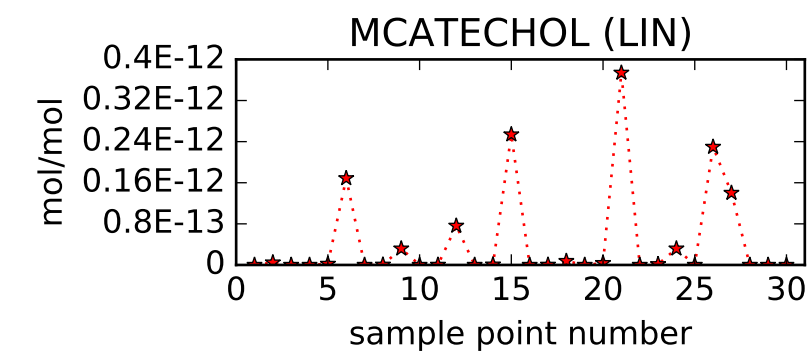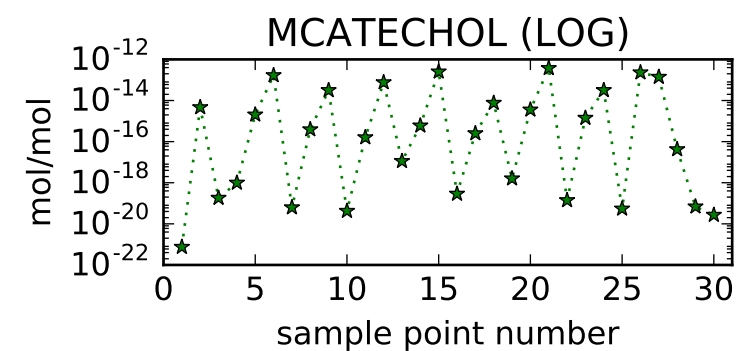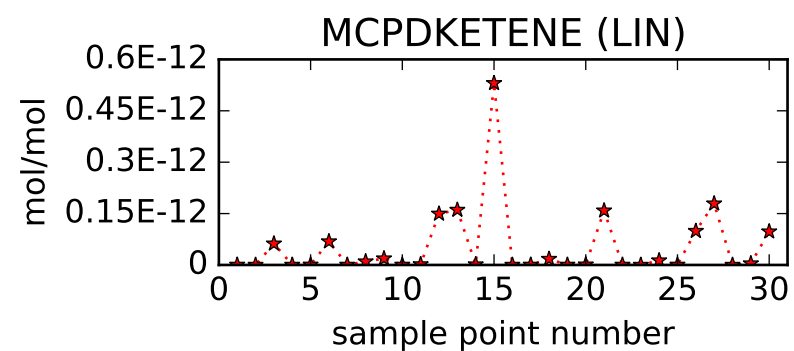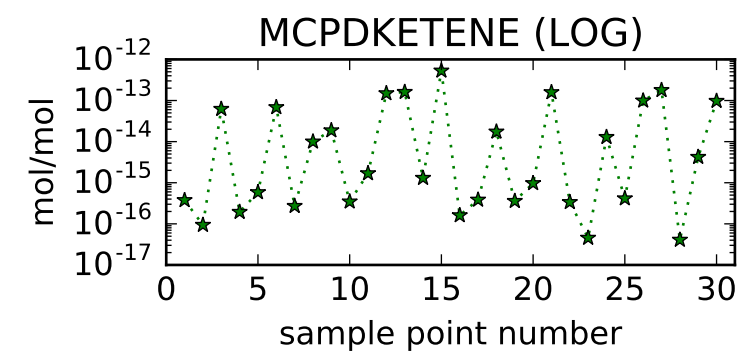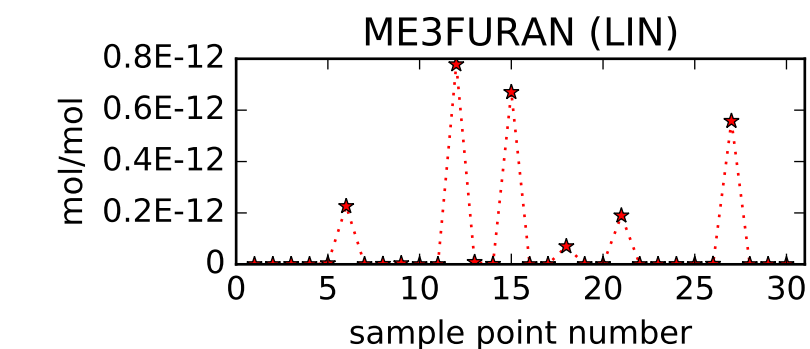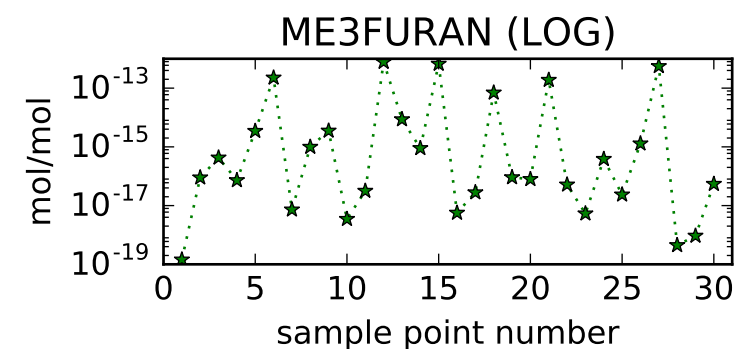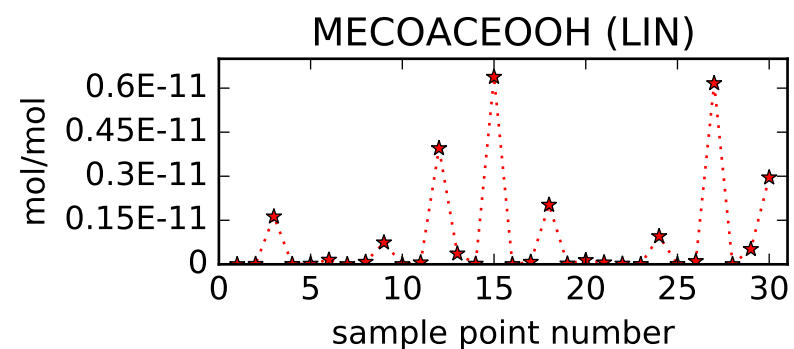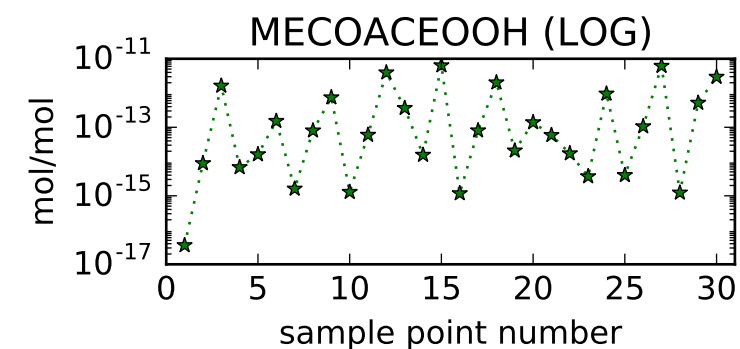

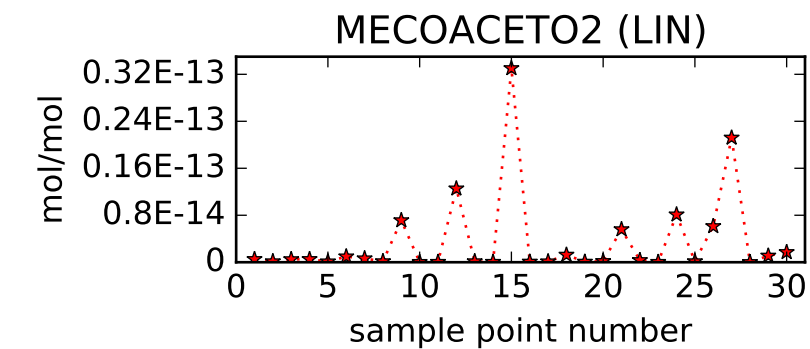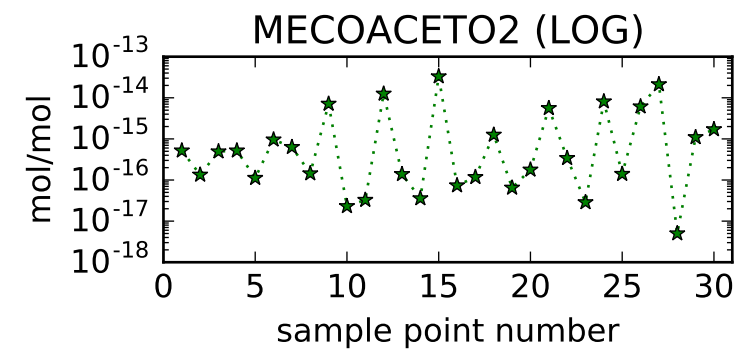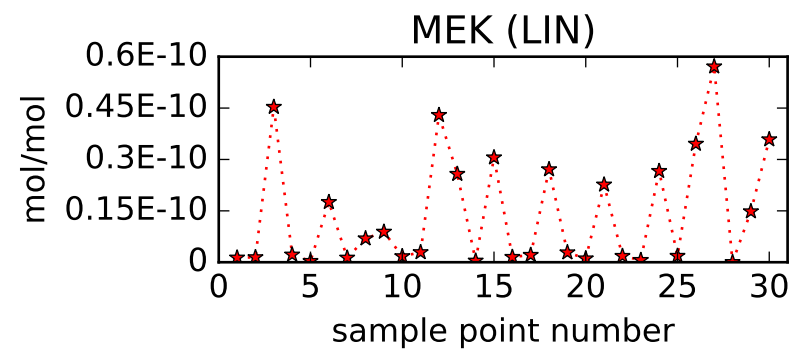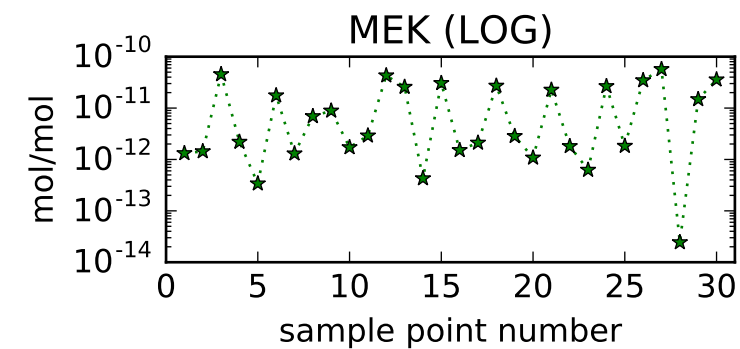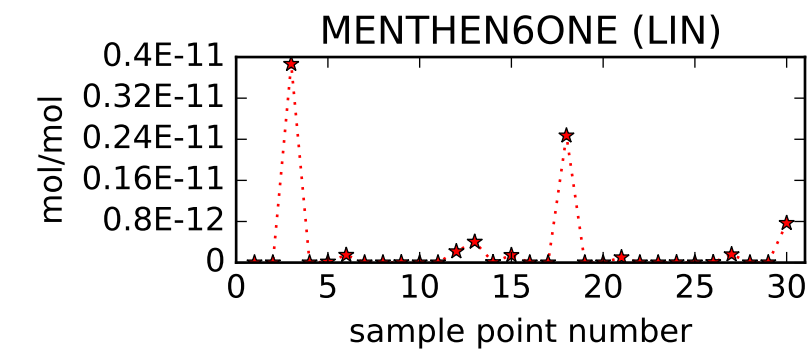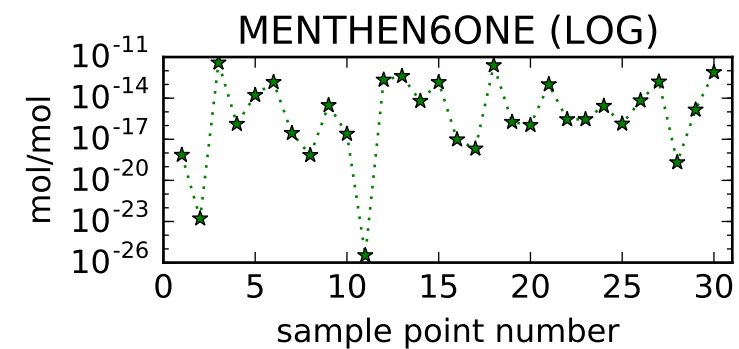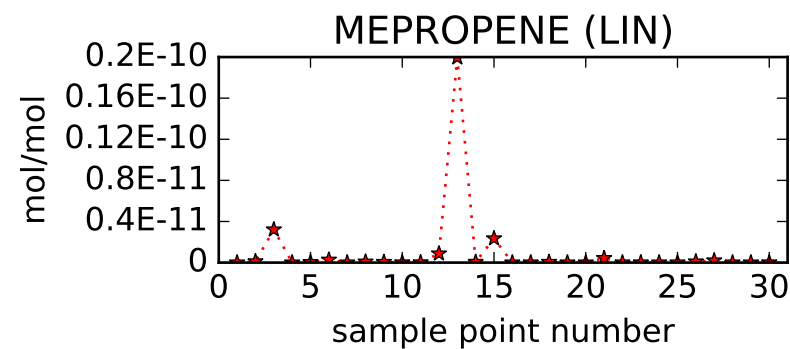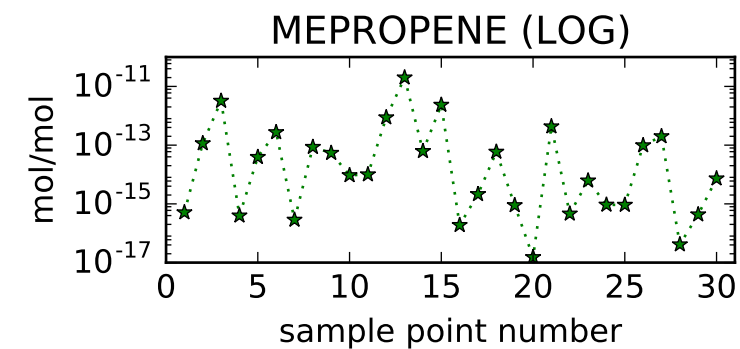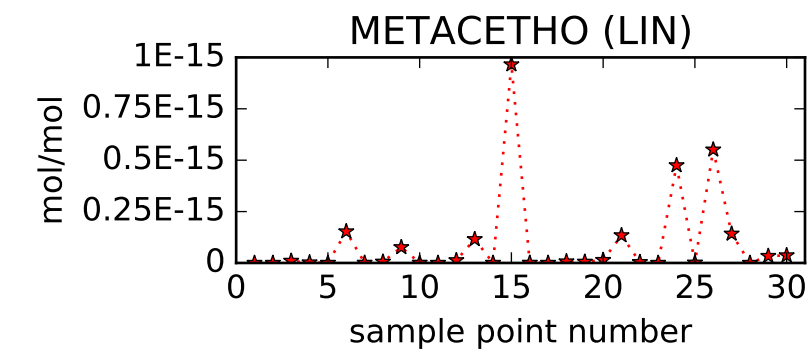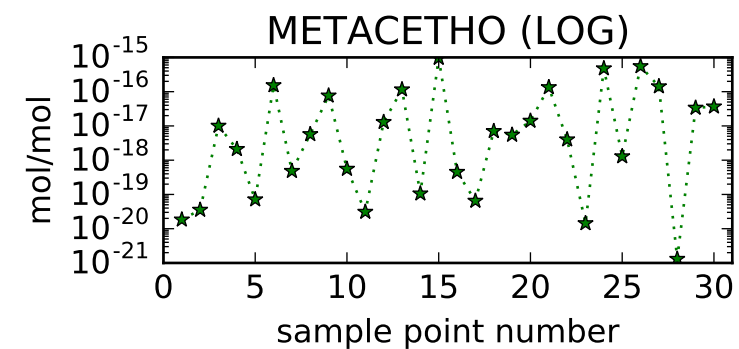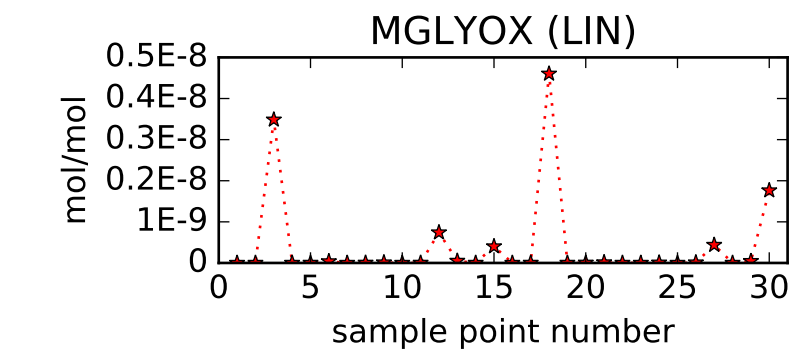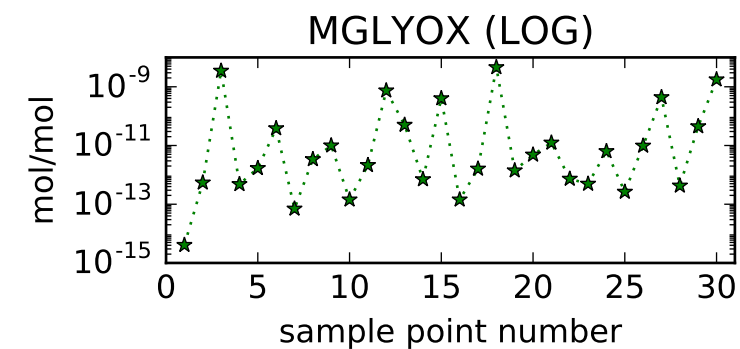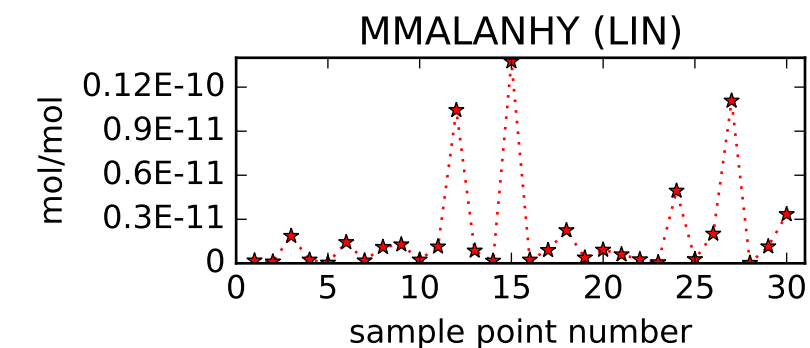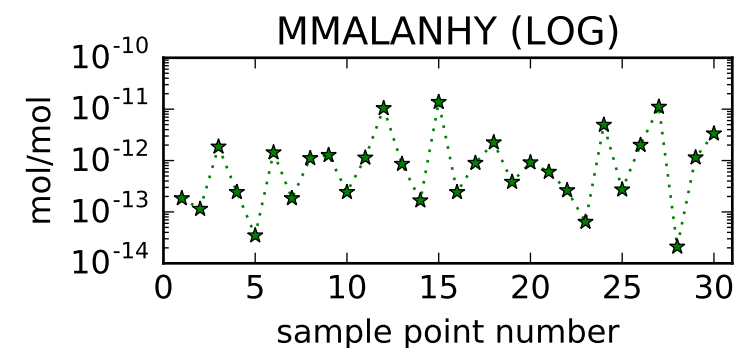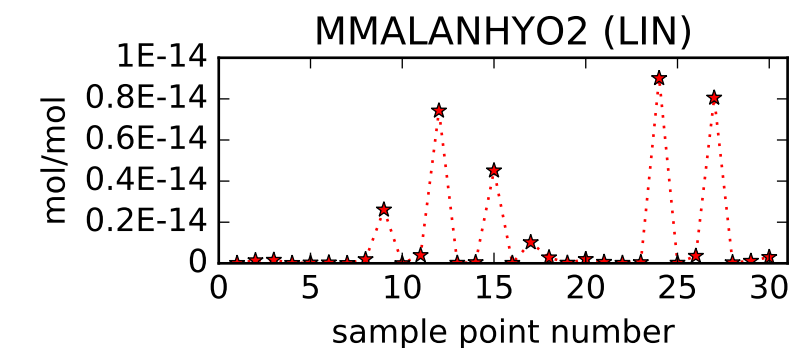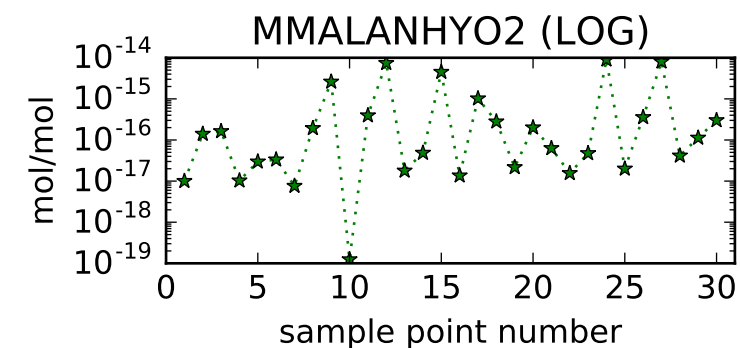



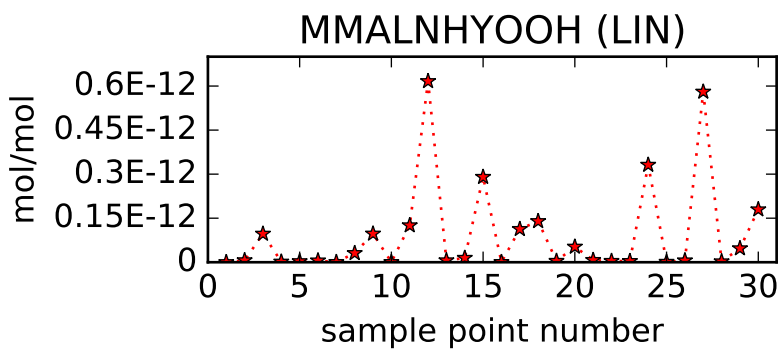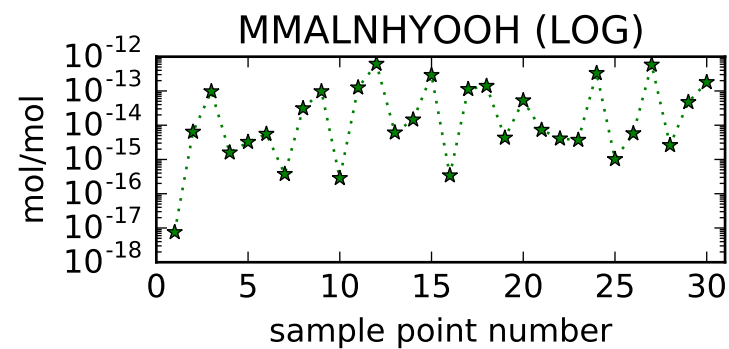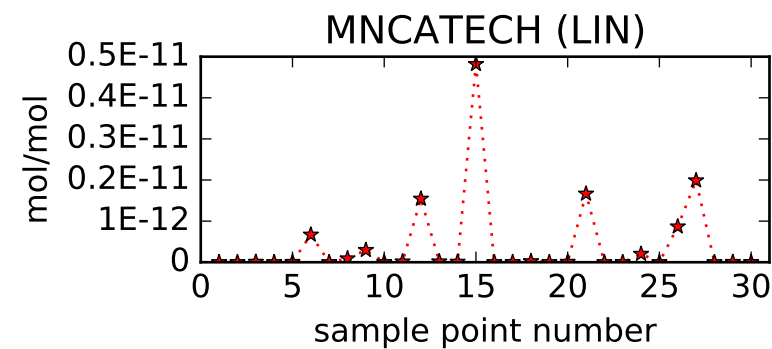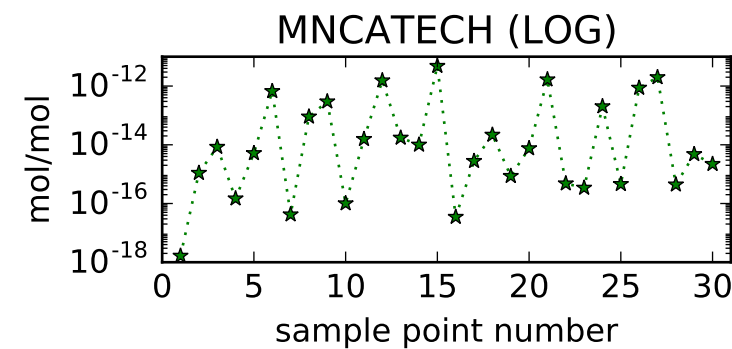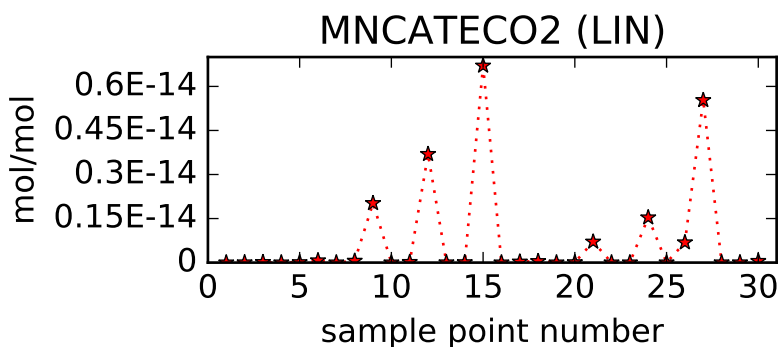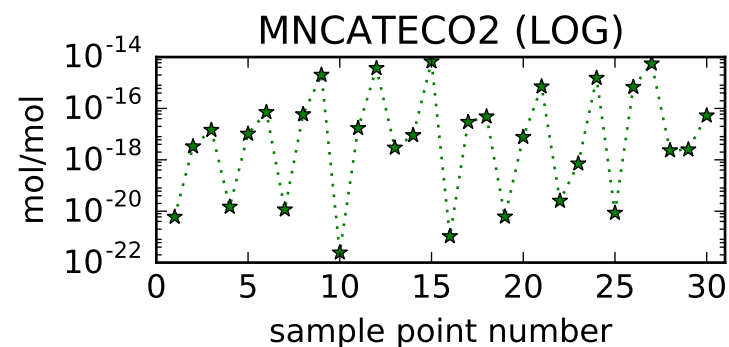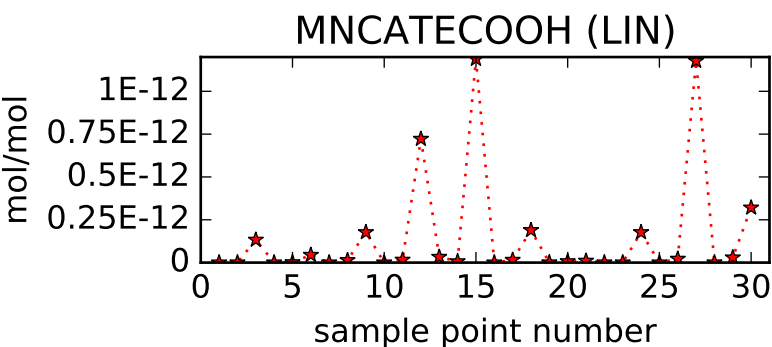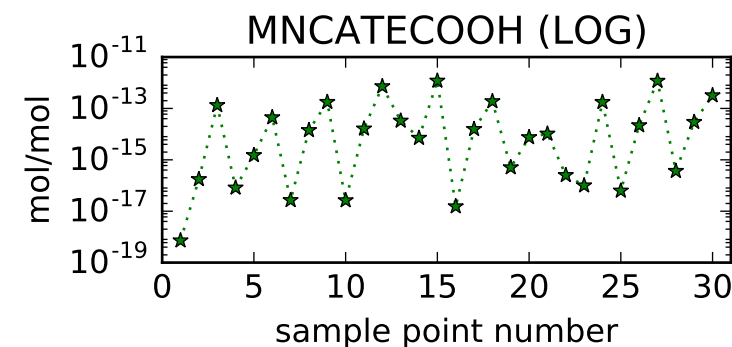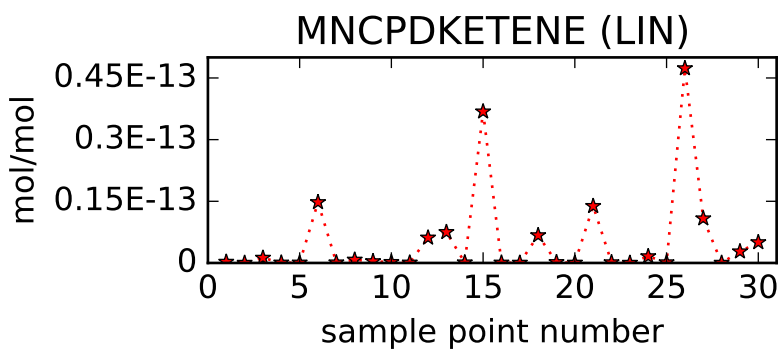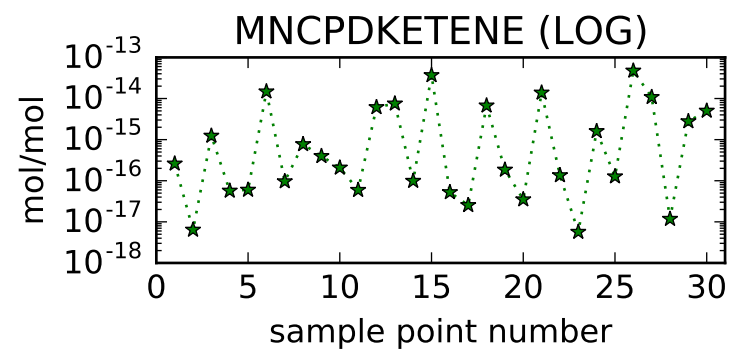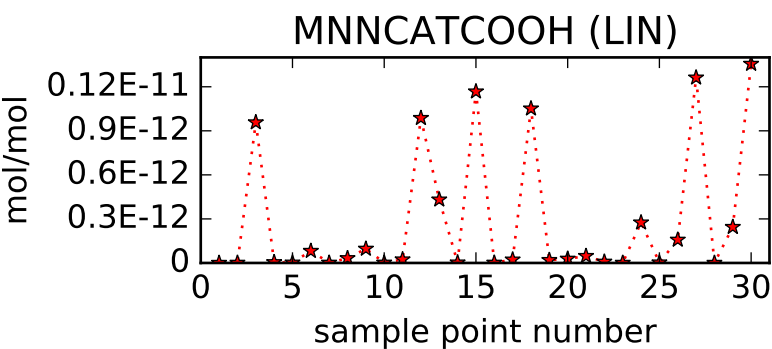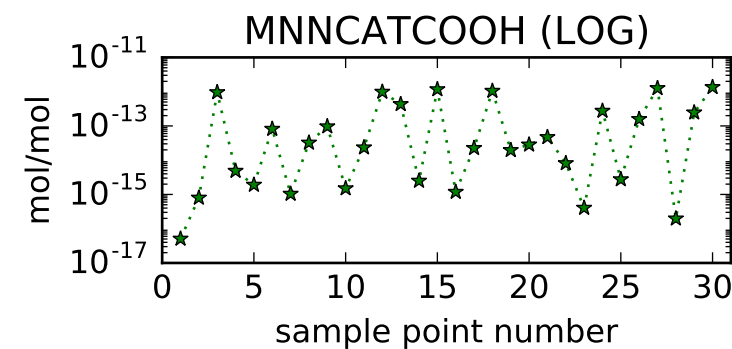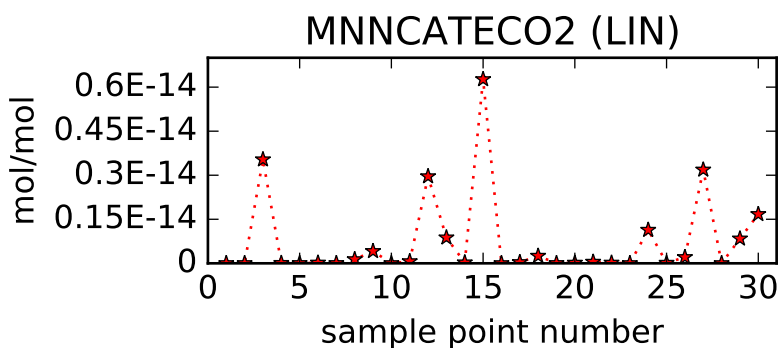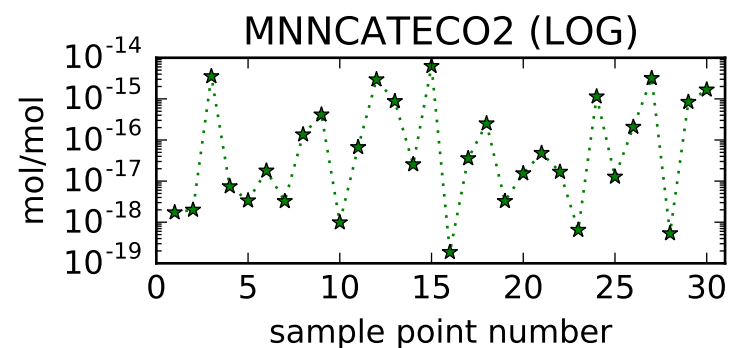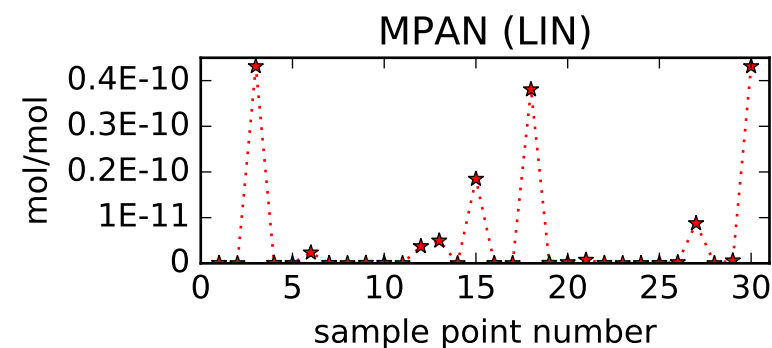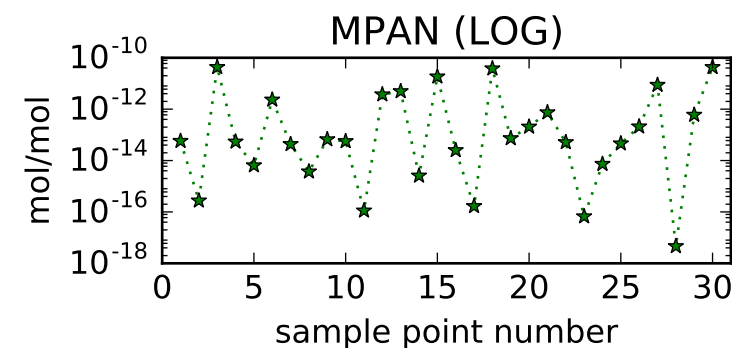

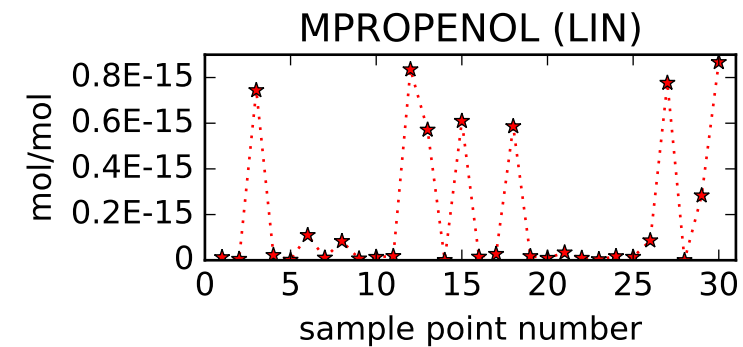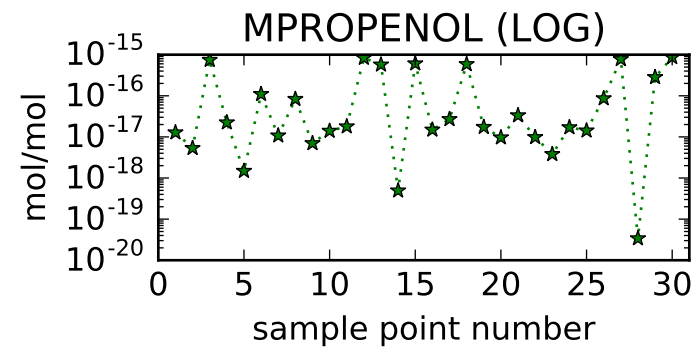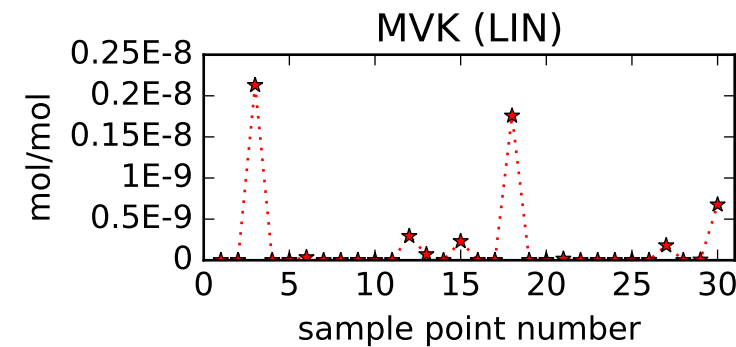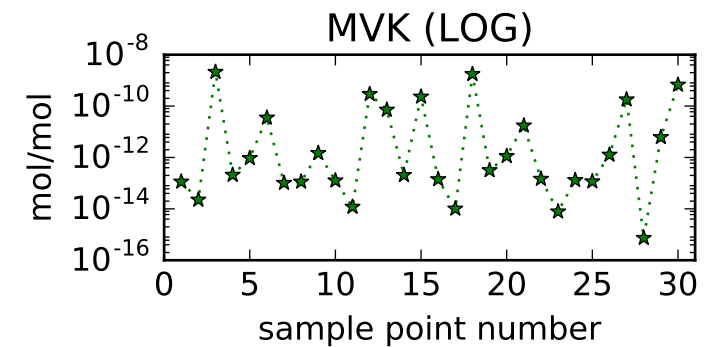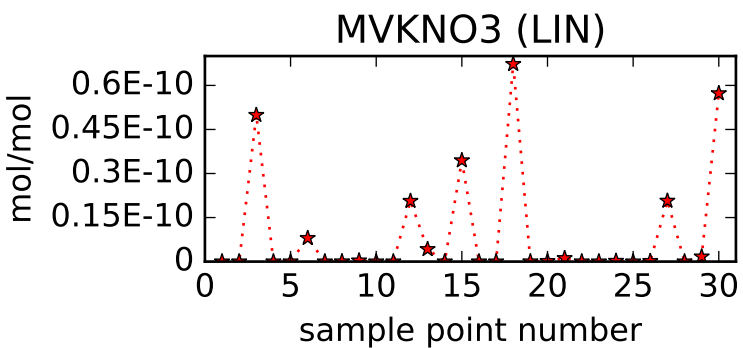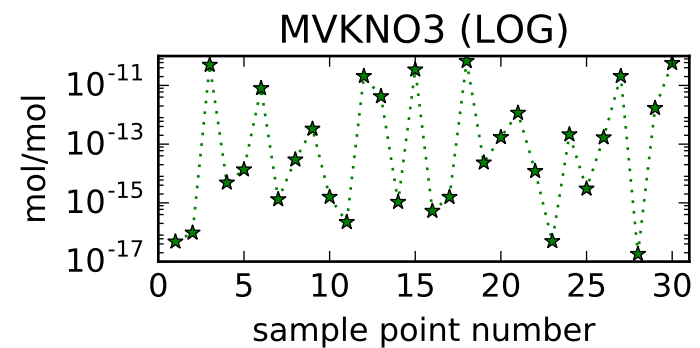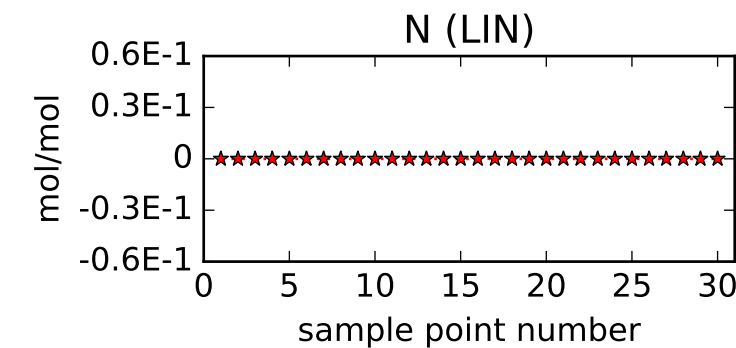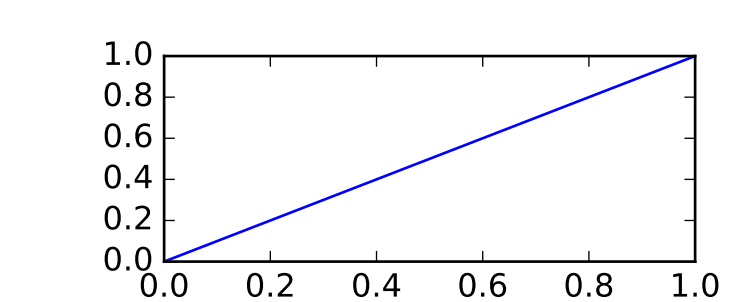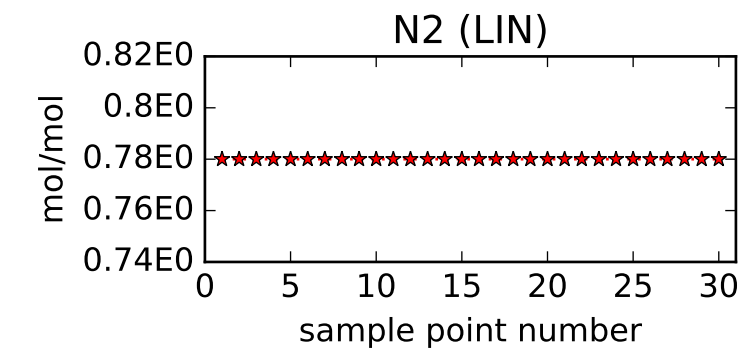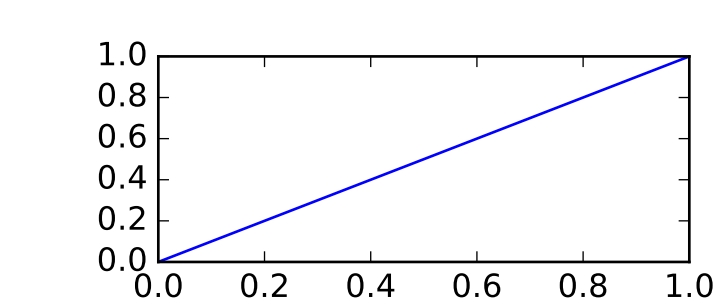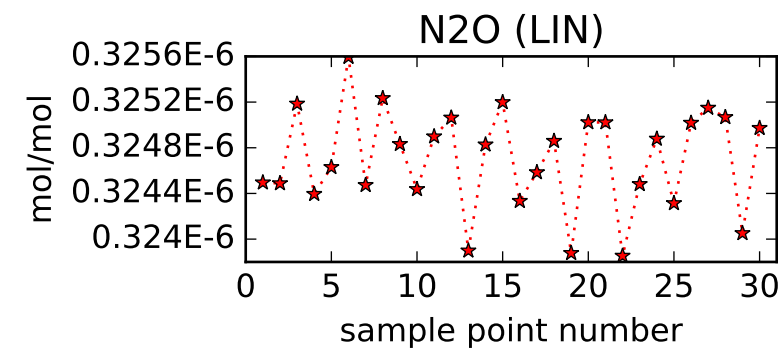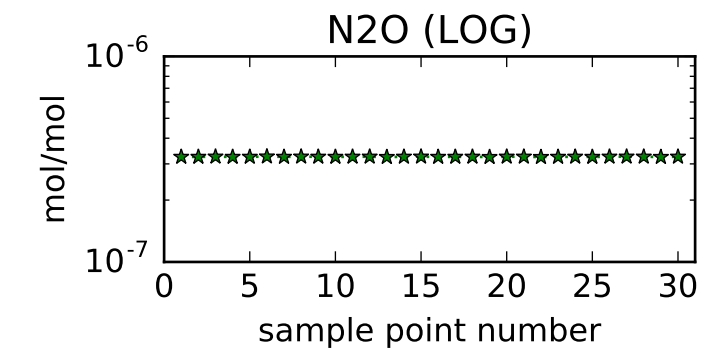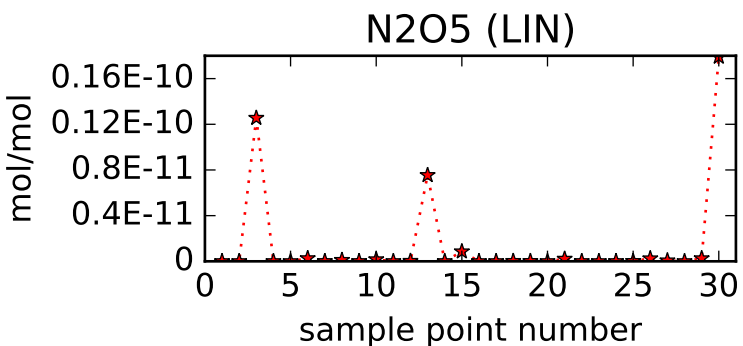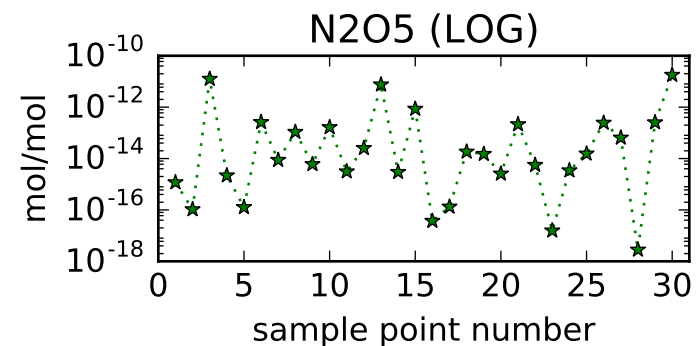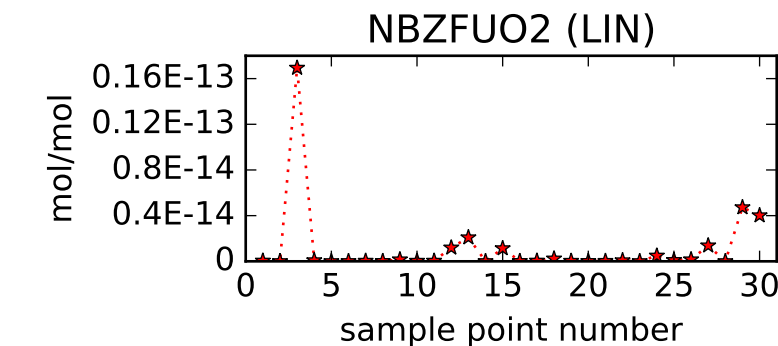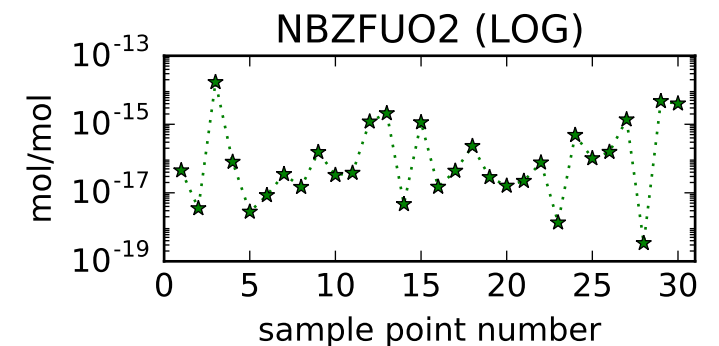

NBZFUONE (LIN)

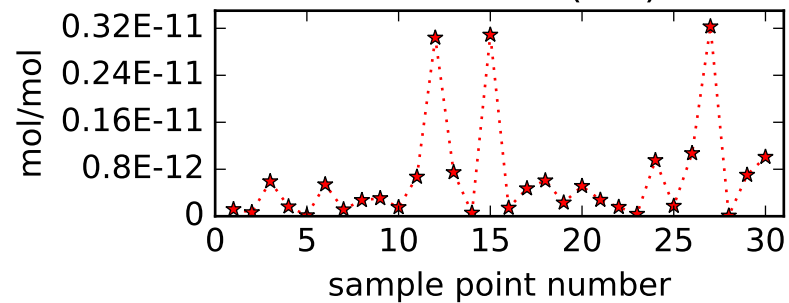

NBZFUONE (LOG)

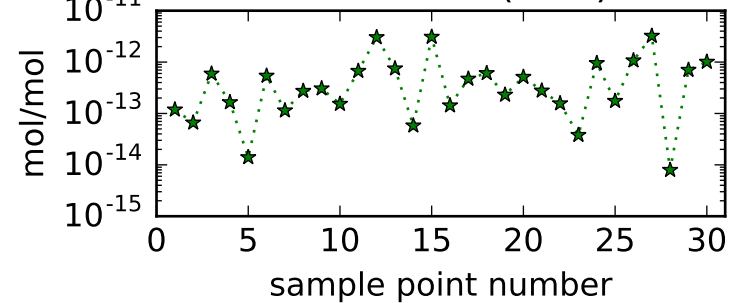

NBZFUOOH (LIN)

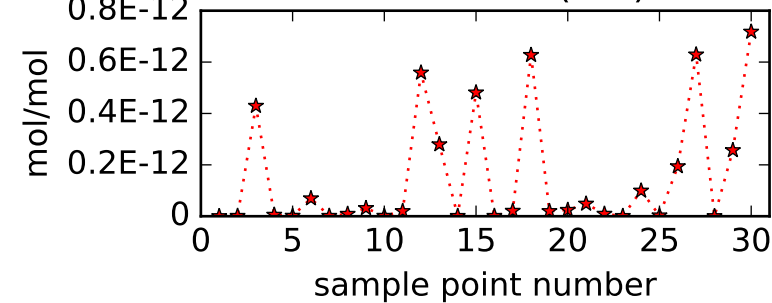

NBZFUOOH (LOG)

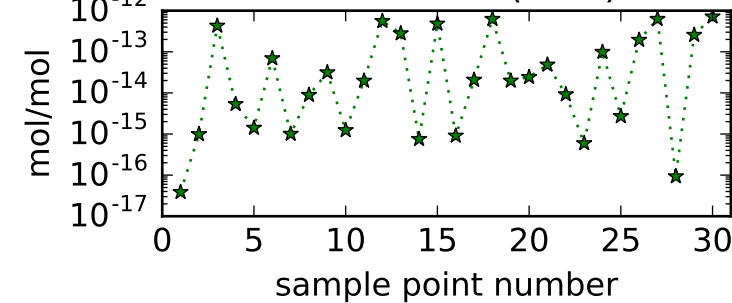

NBZQO2 (LIN)

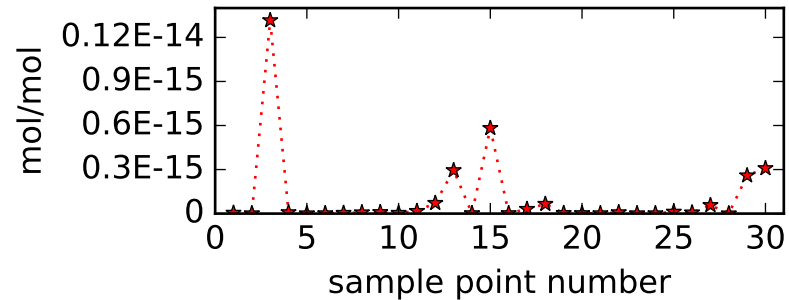

NBZQO2 (LOG)

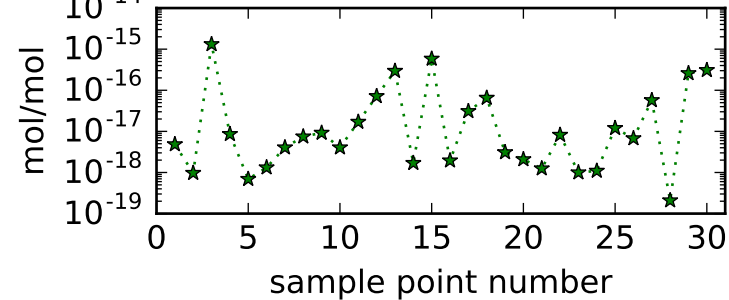

NBZQOOH (LIN)

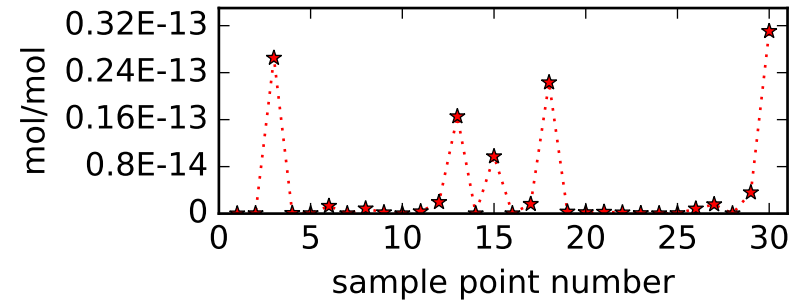

NBZQOOH (LOG)

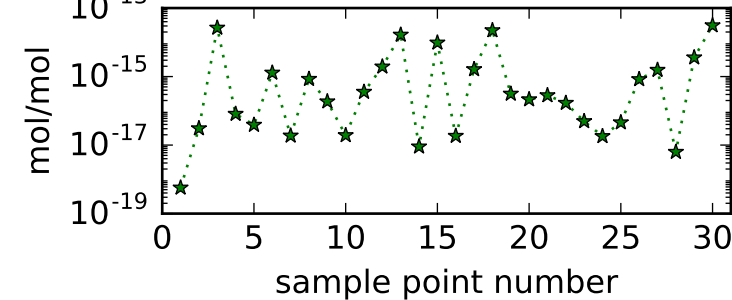

NC3H7NO3 (LIN)

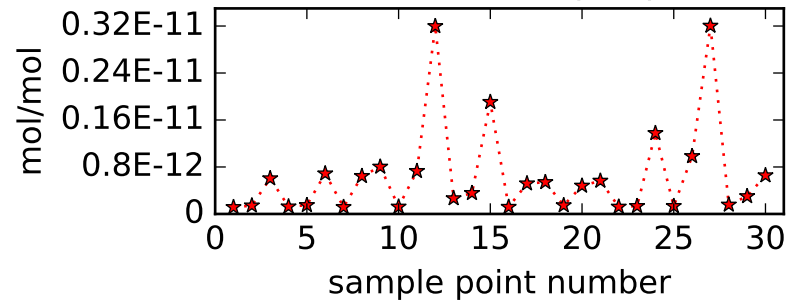

NC3H7NO3 (LOG)

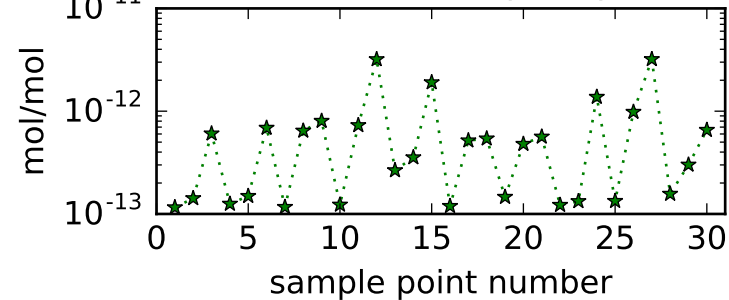

NC3H7O2 (LIN)

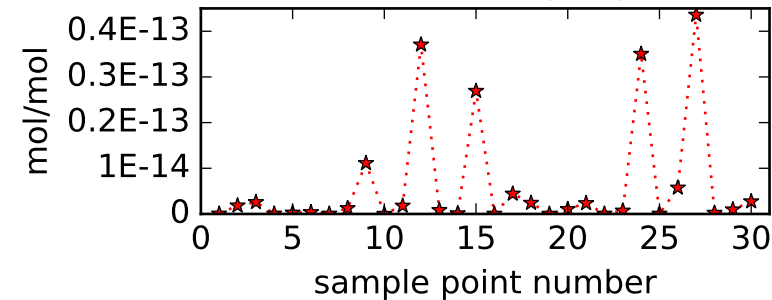

NC3H7O2 (LOG)

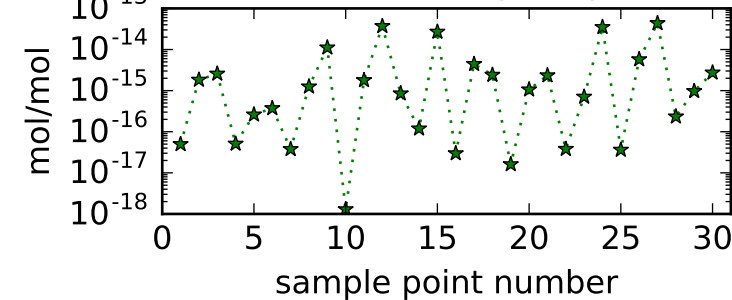

NC3H7OOH (LIN)

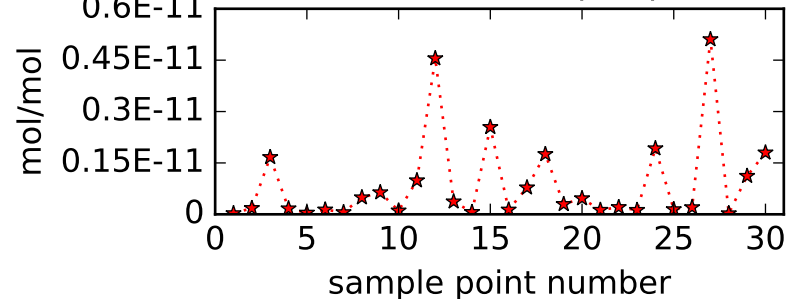

NC3H7OOH (LOG)

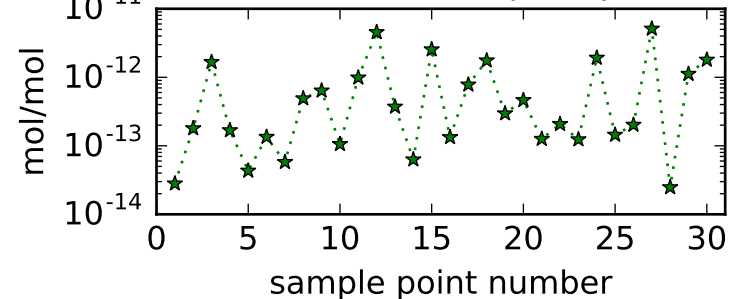

NC4CHO (LIN)

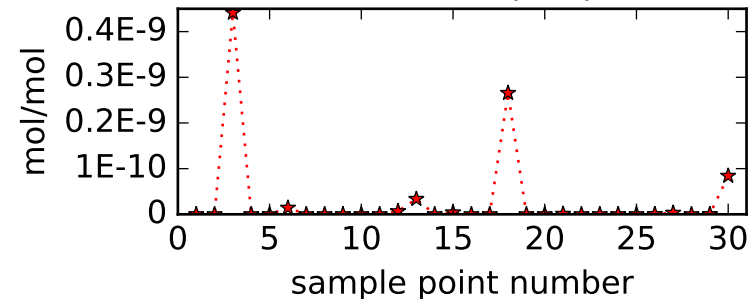

NC4CHO (LOG)

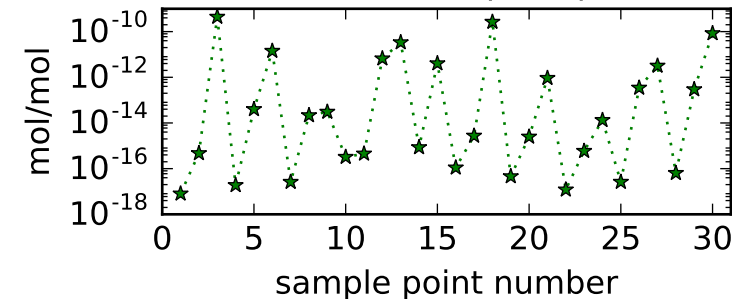

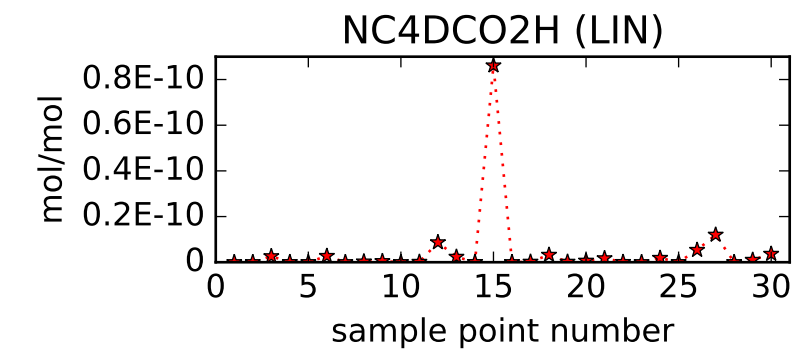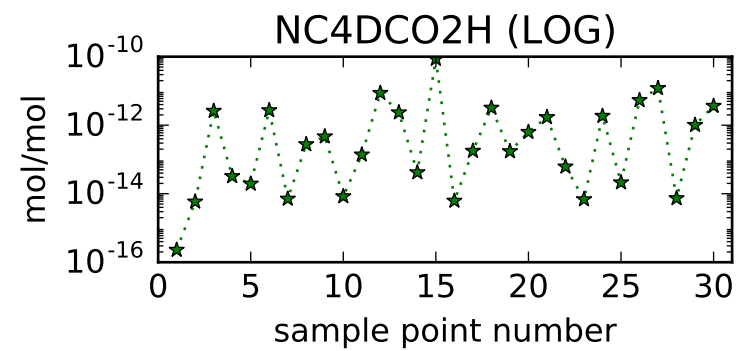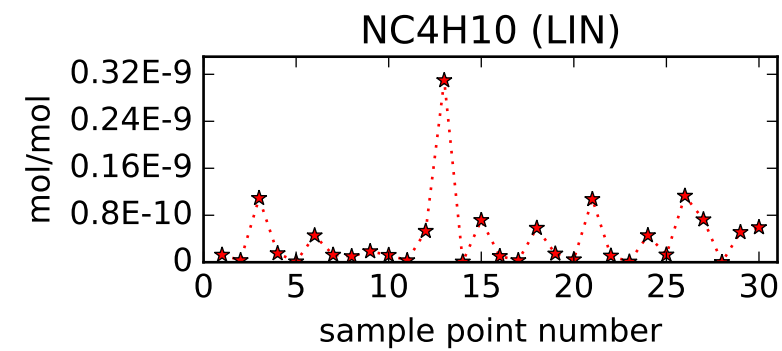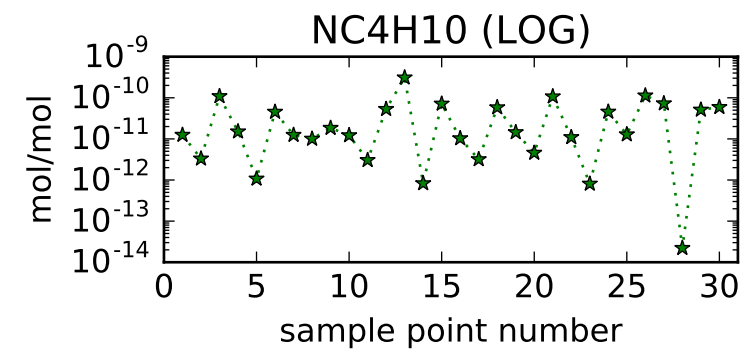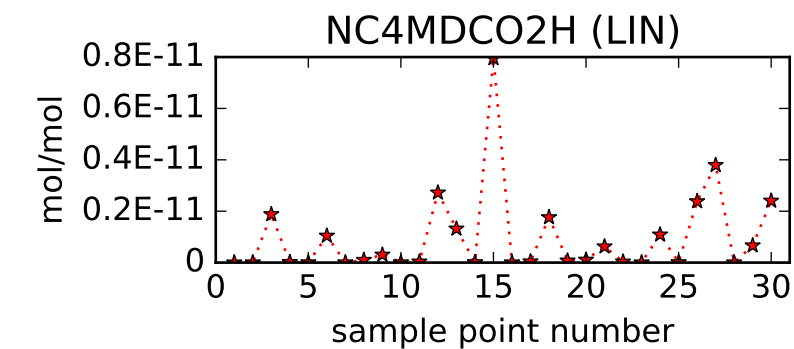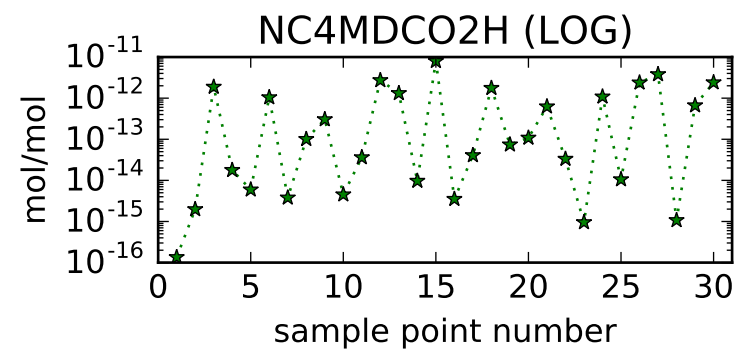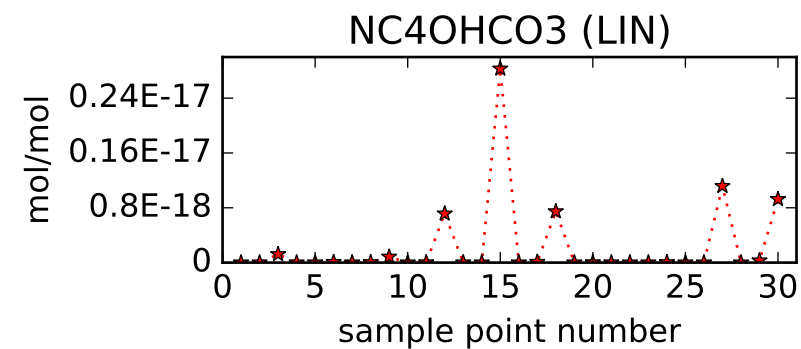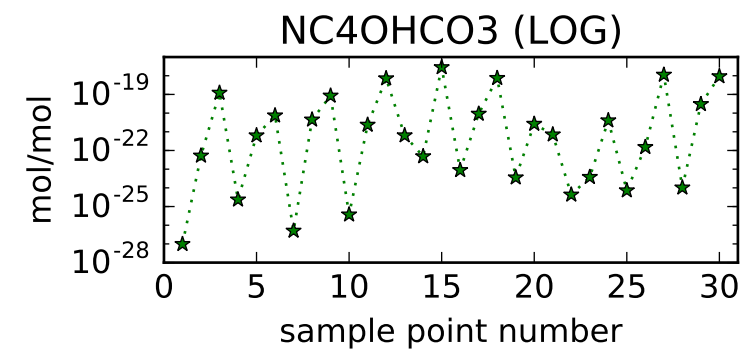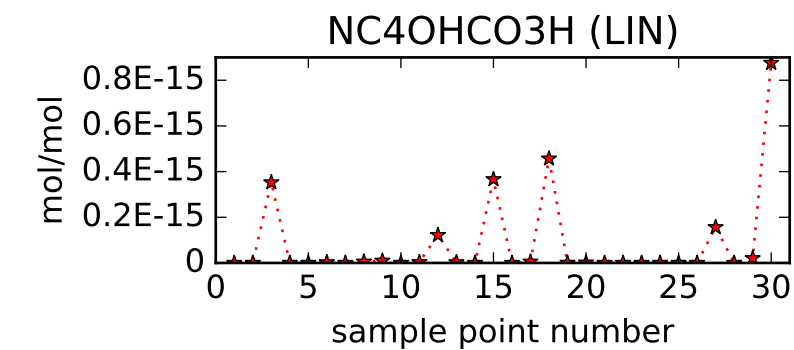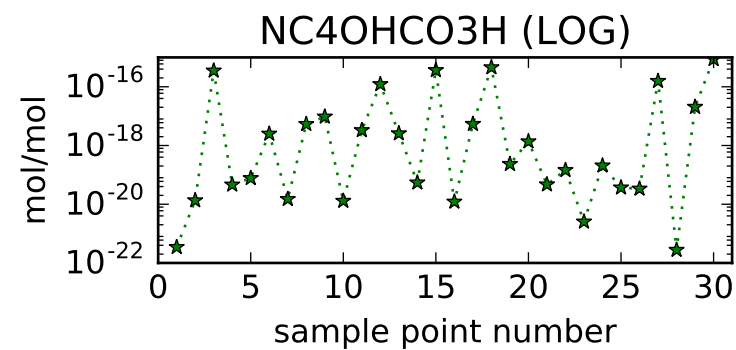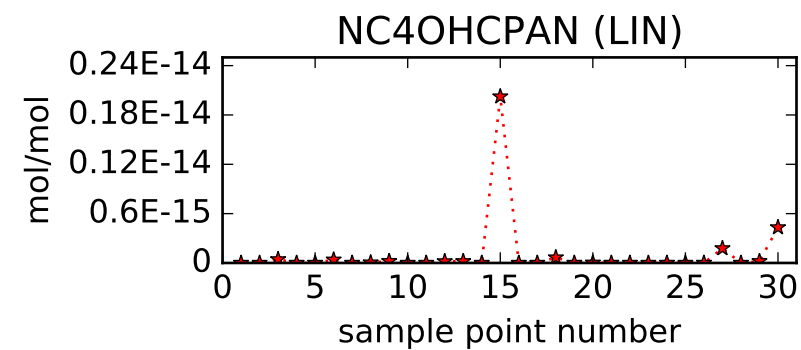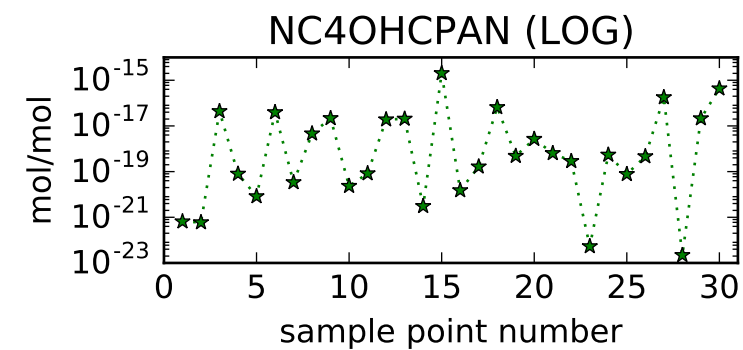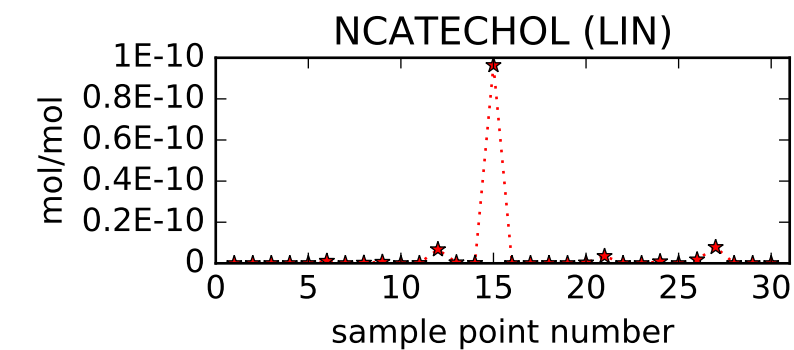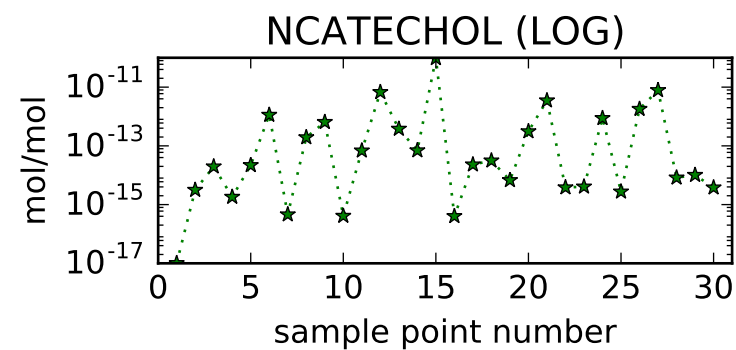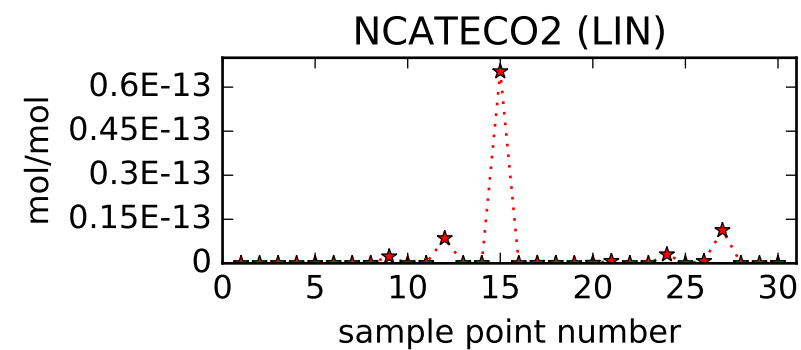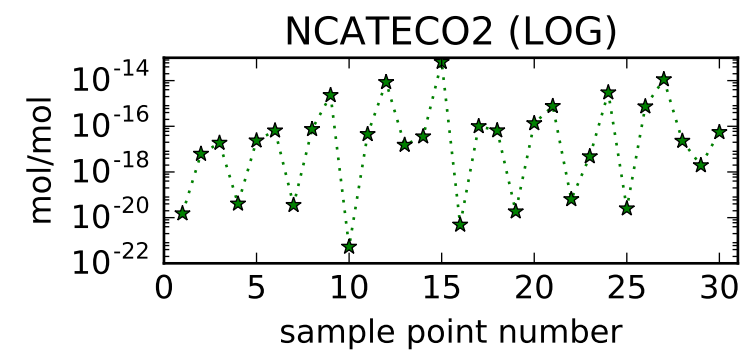

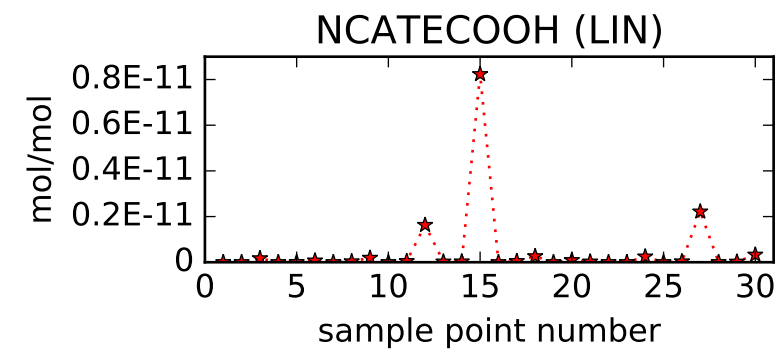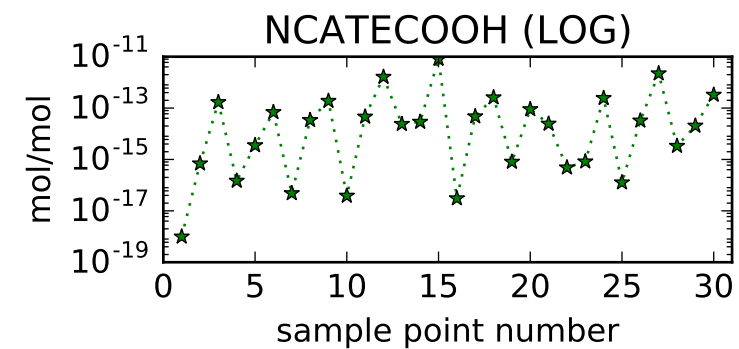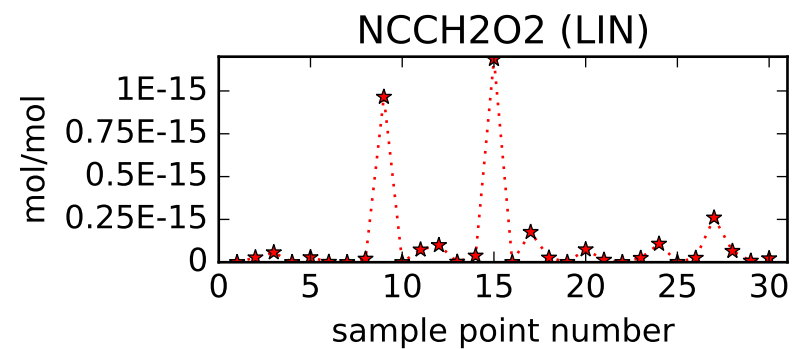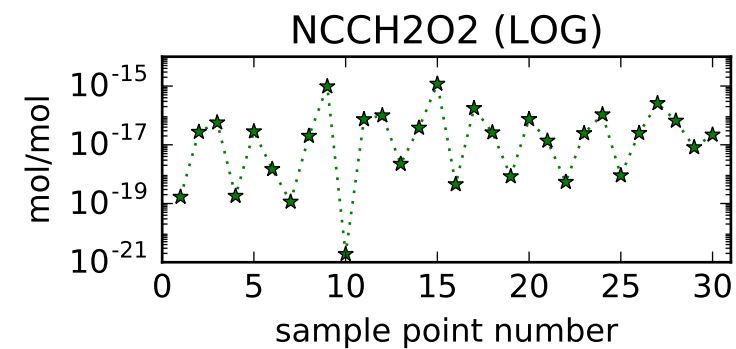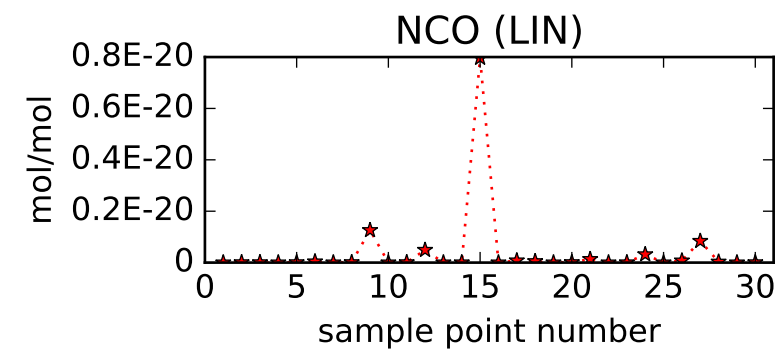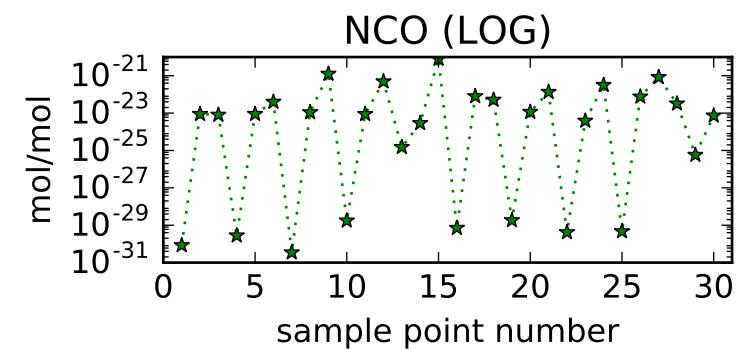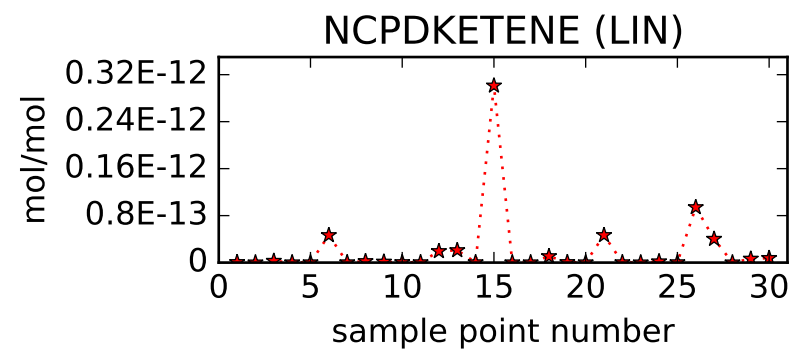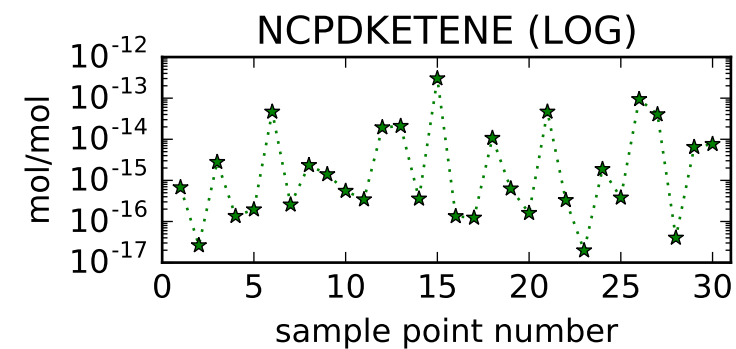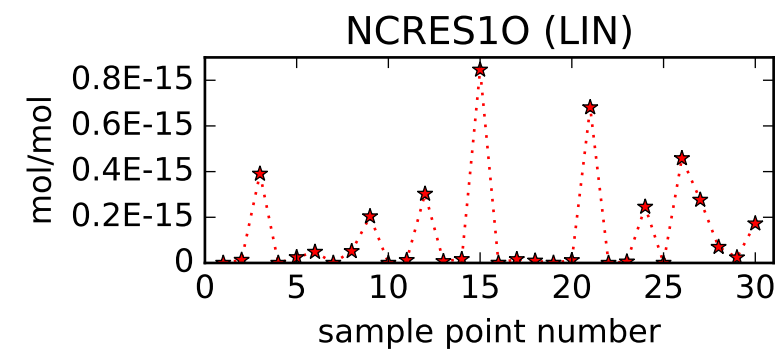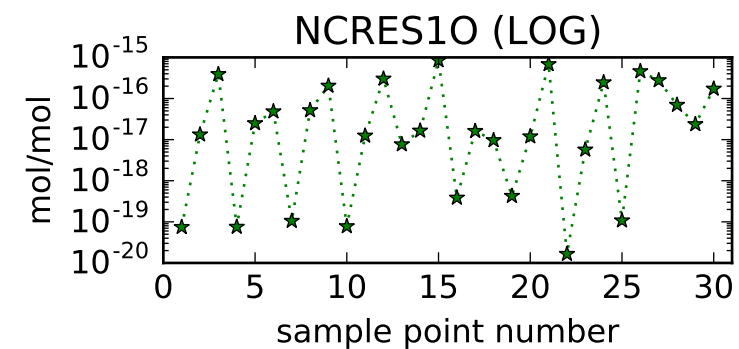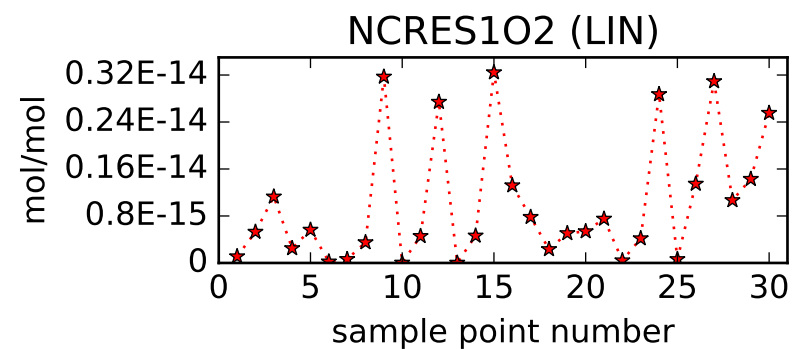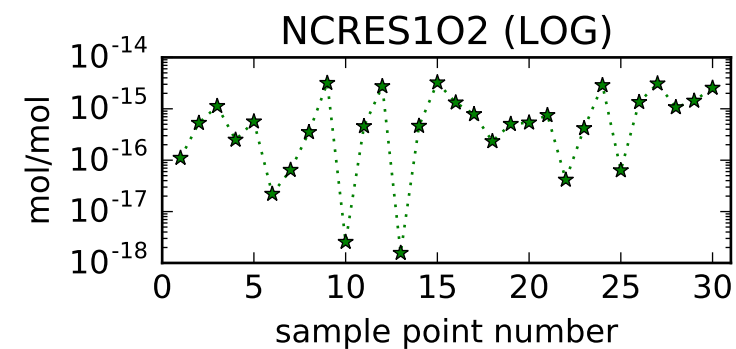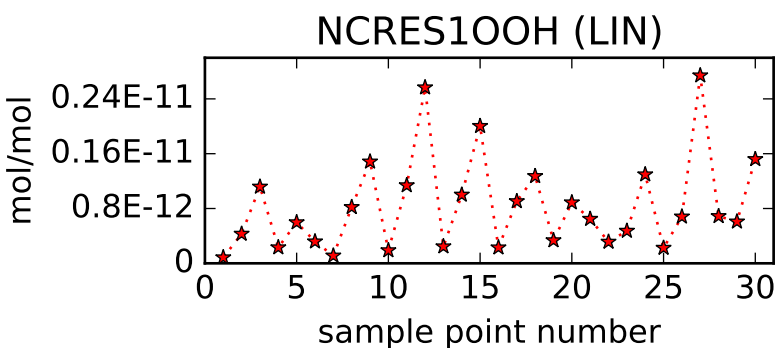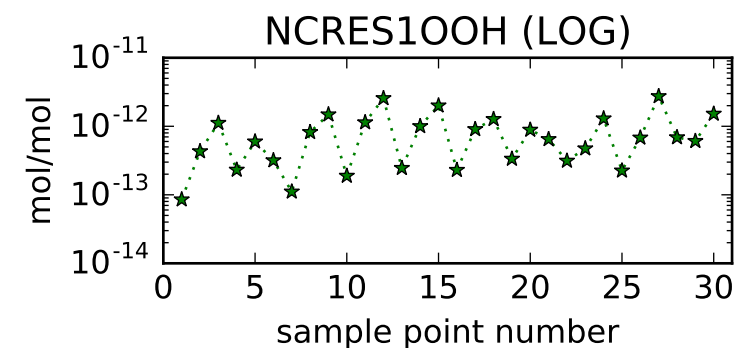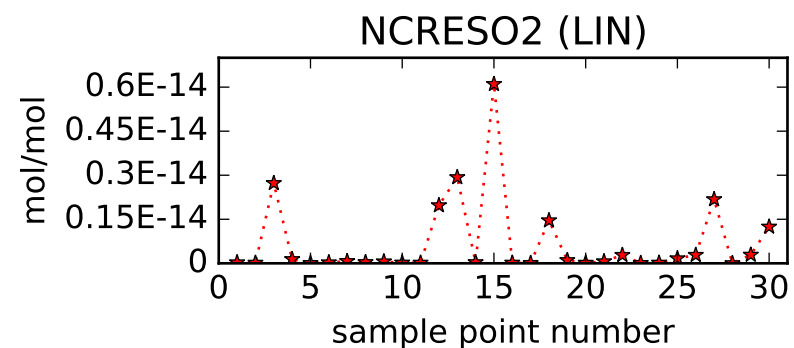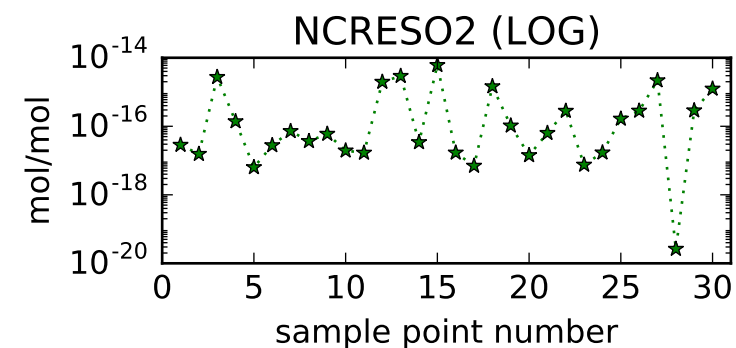



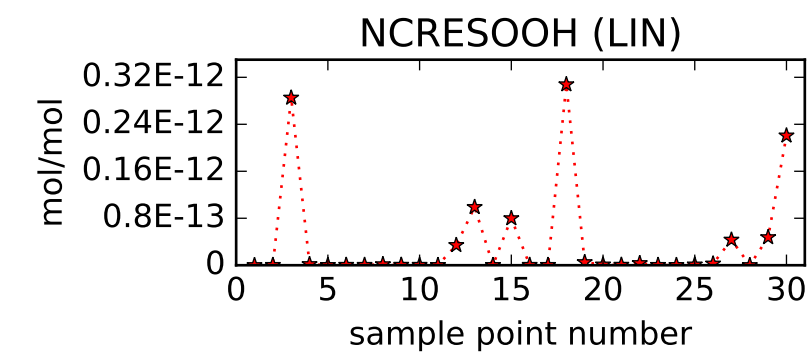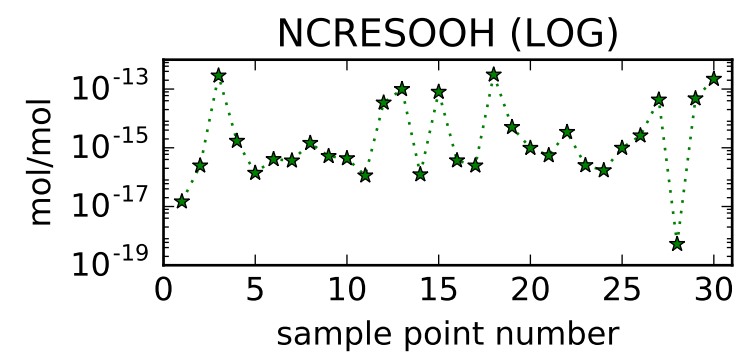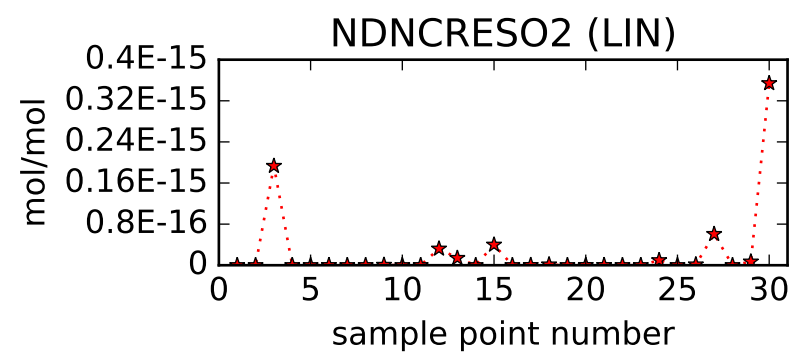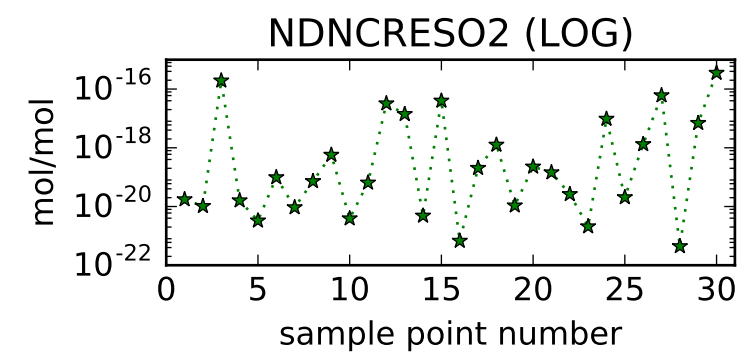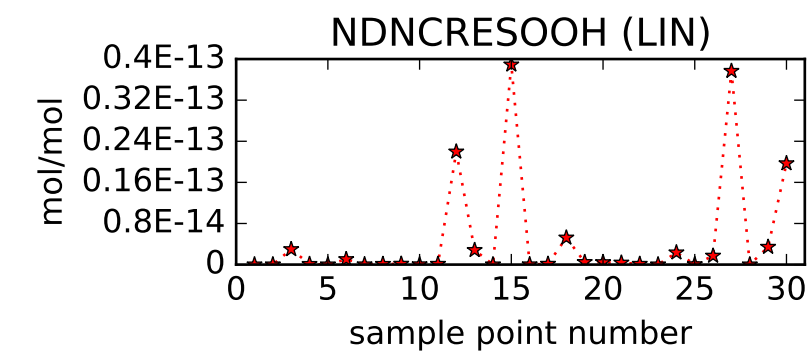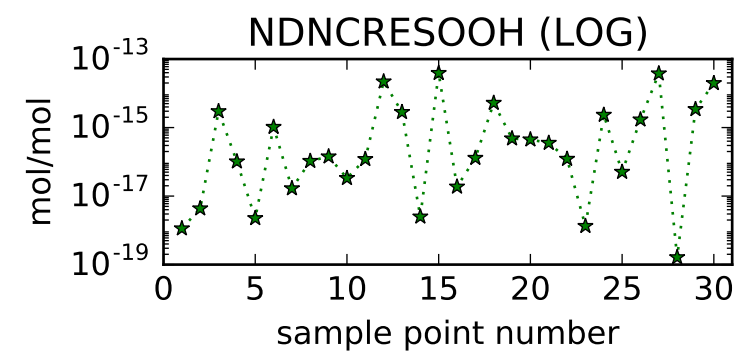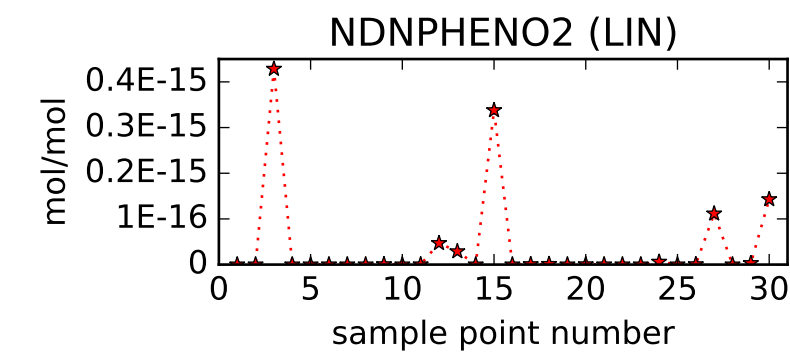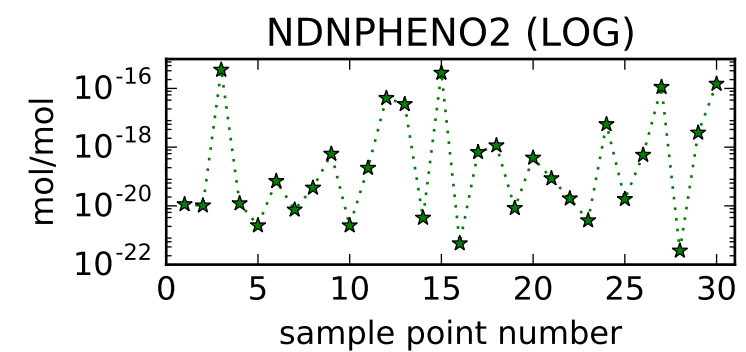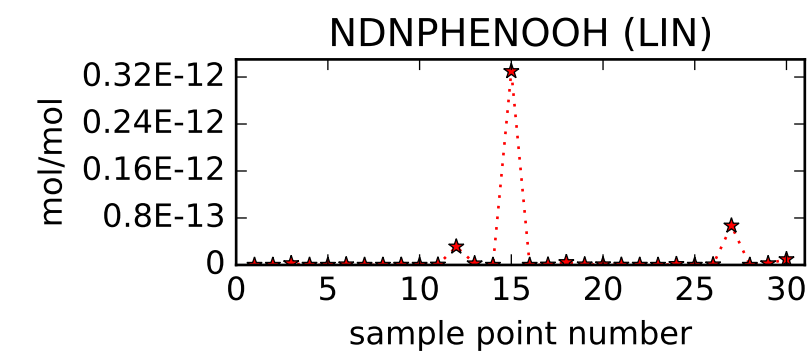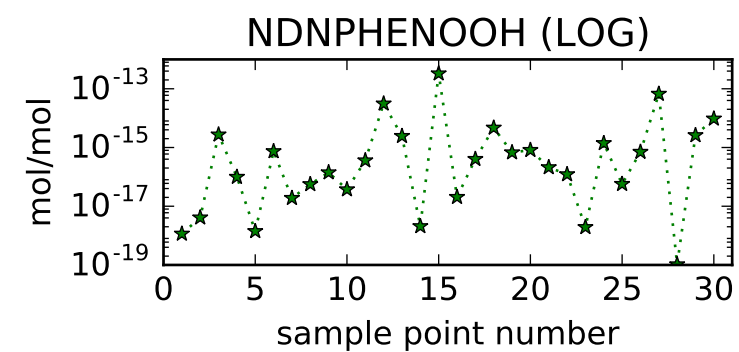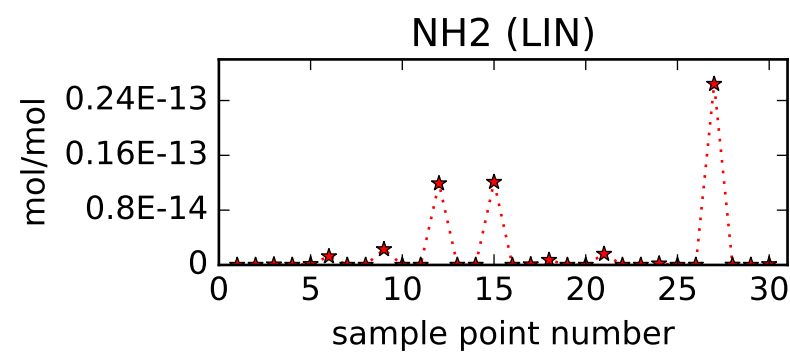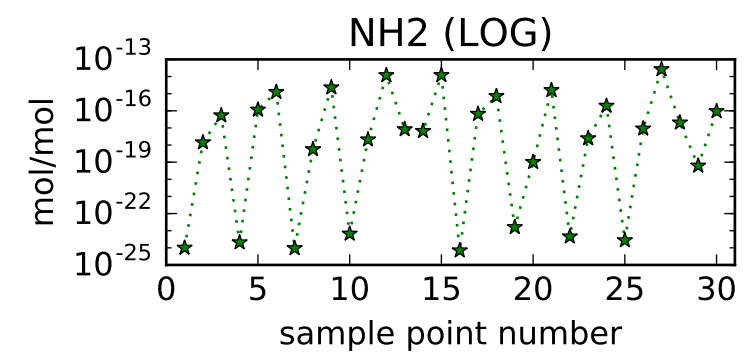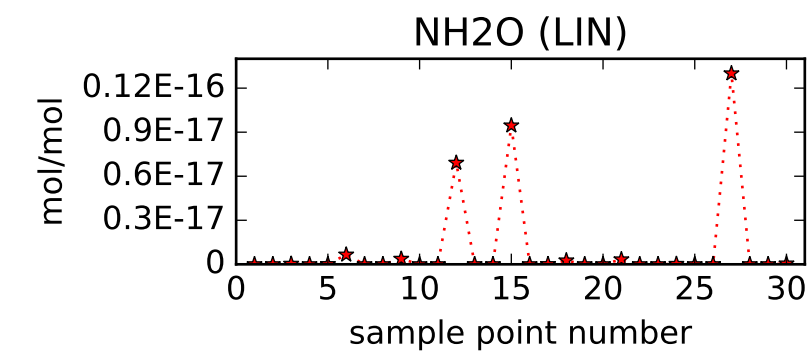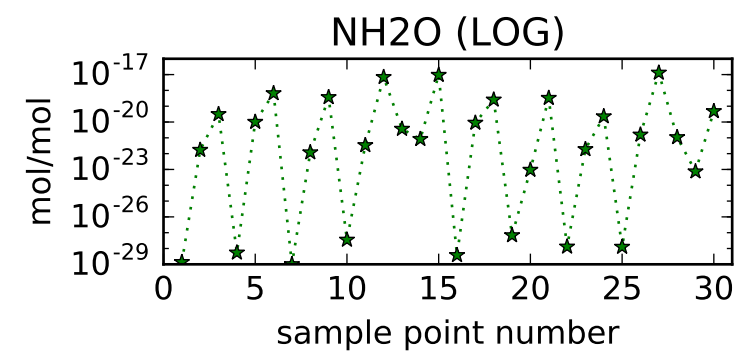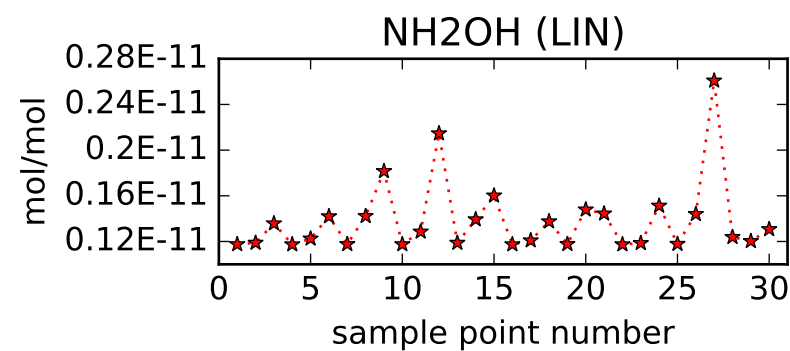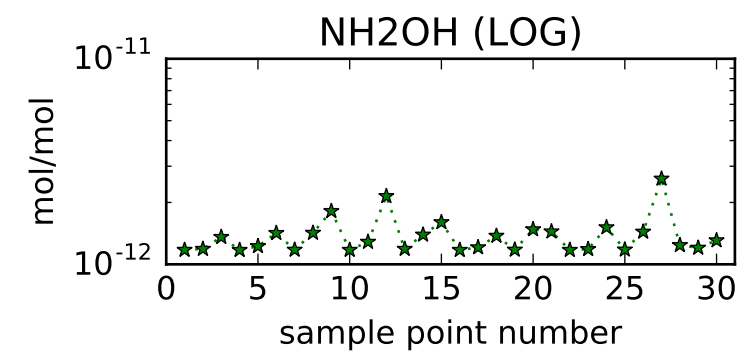

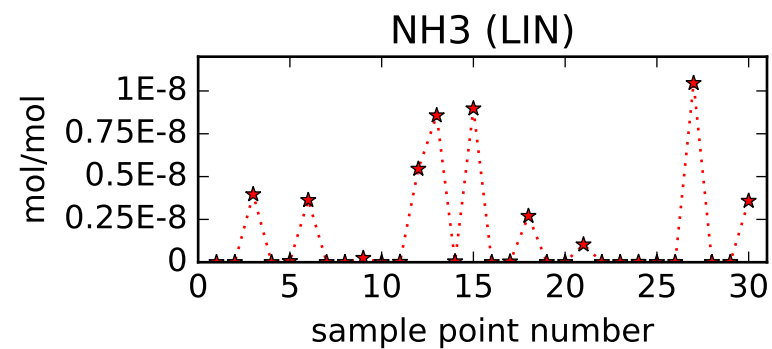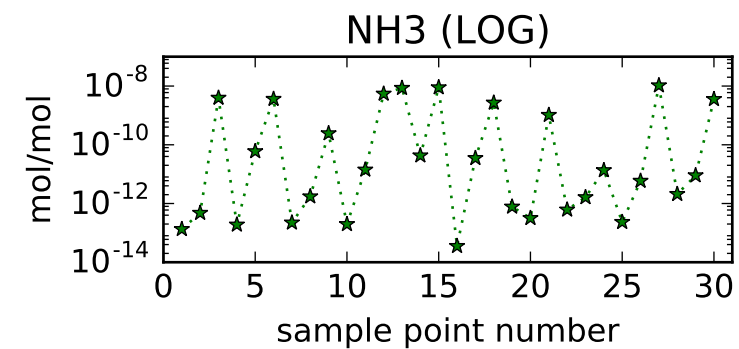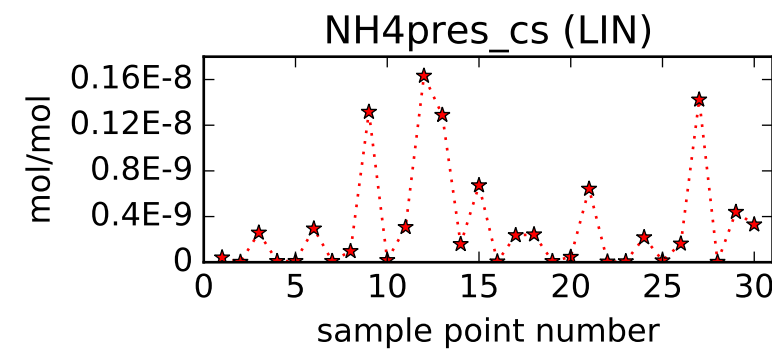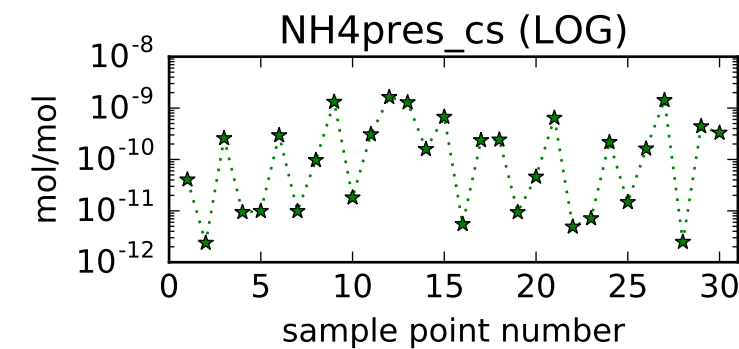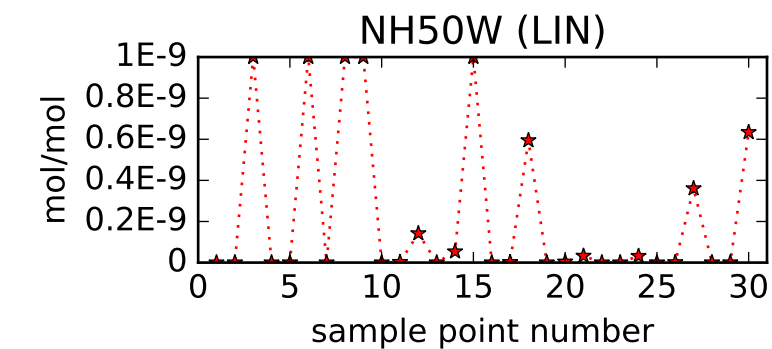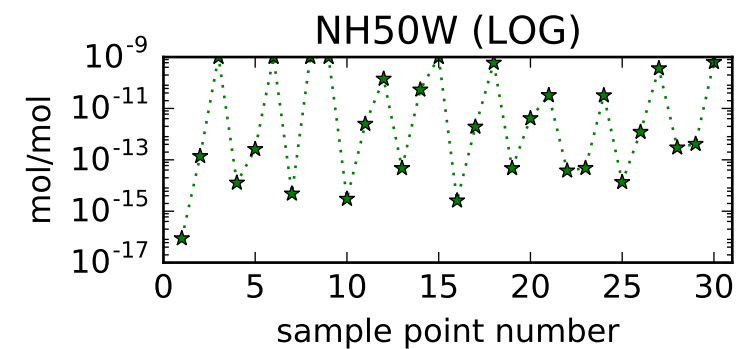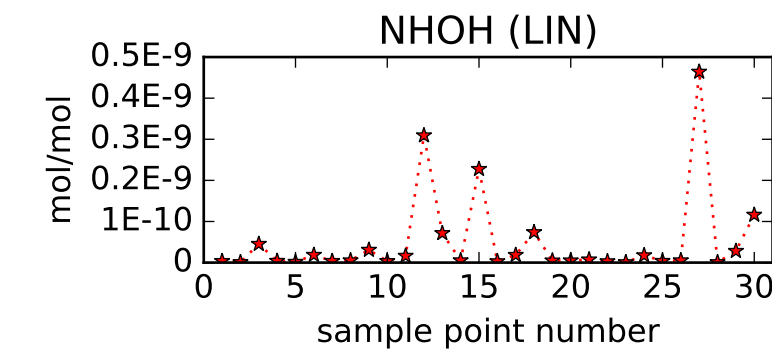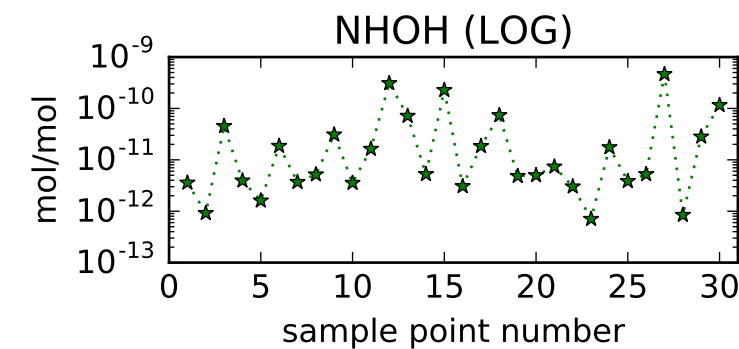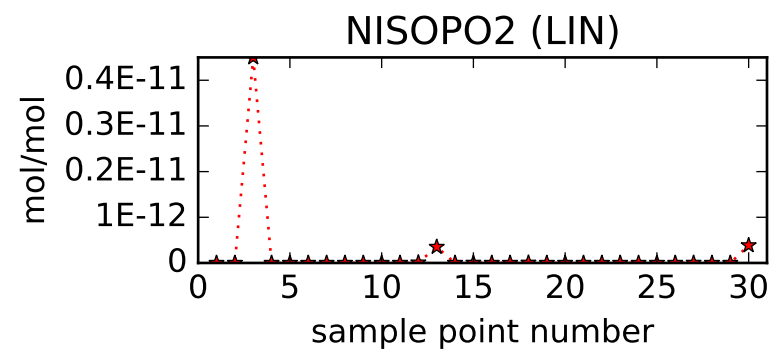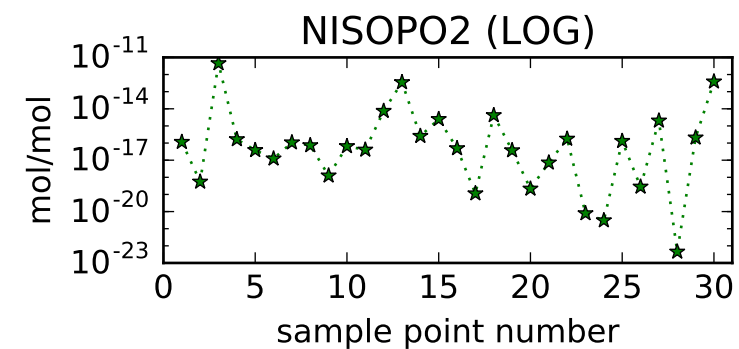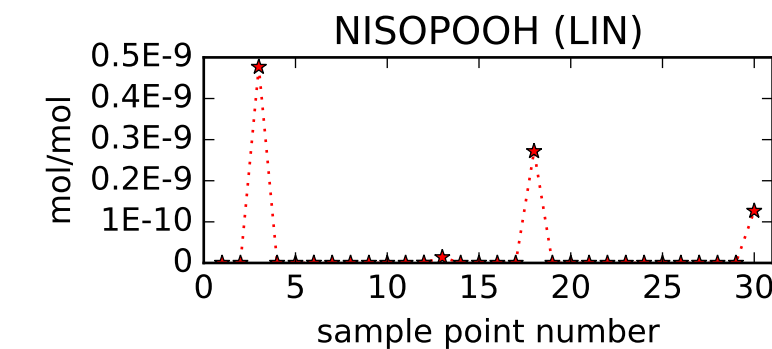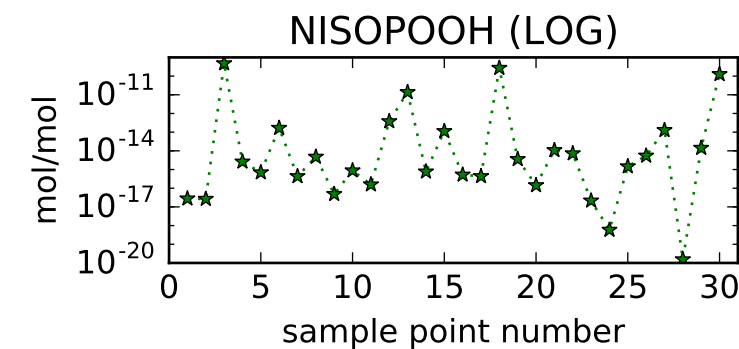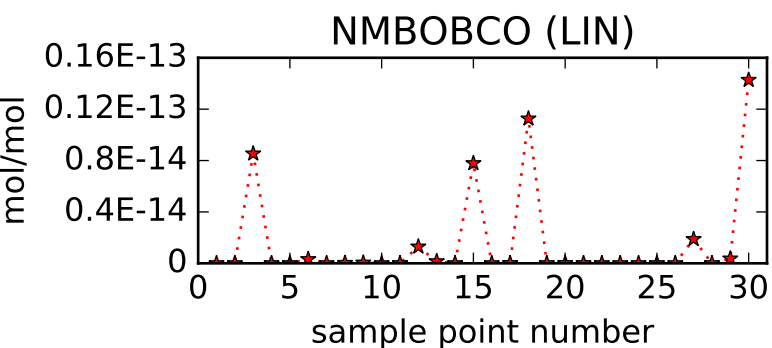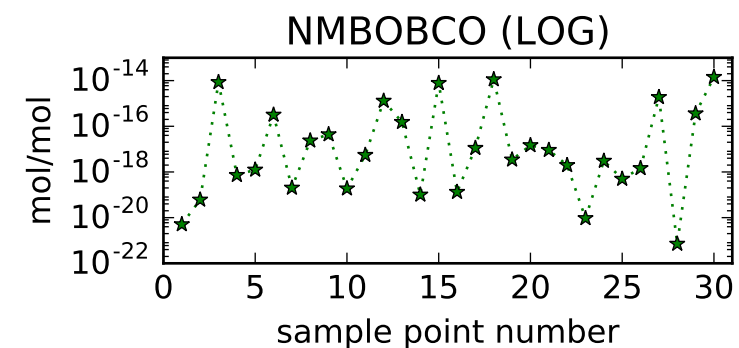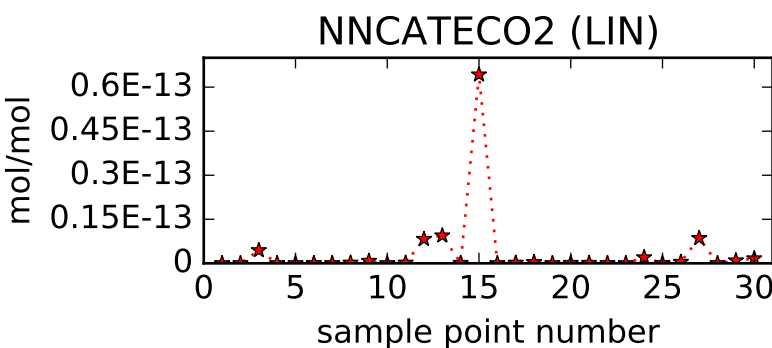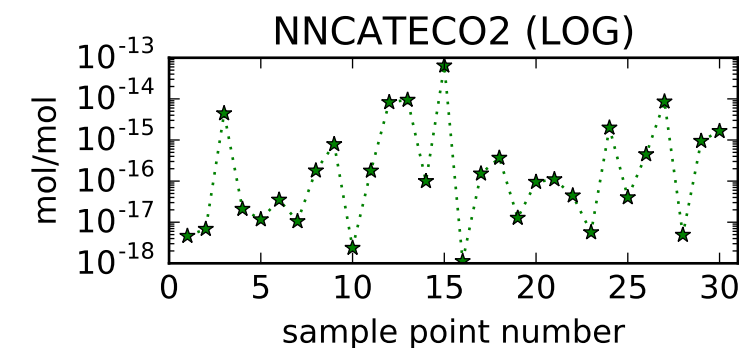

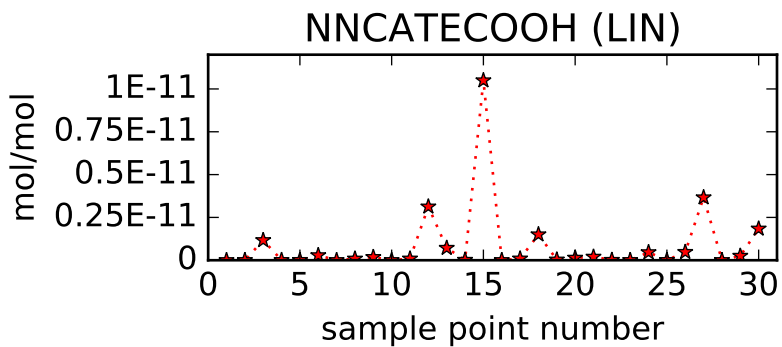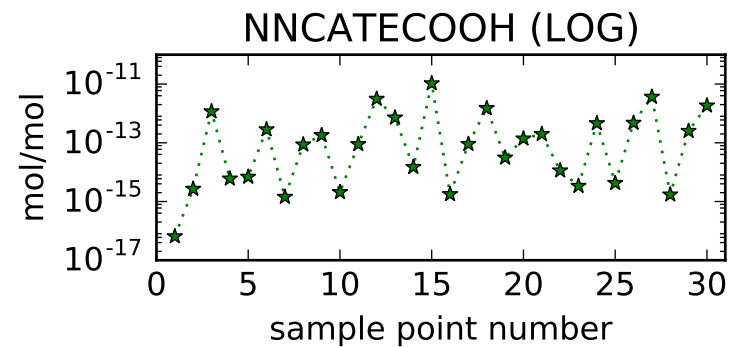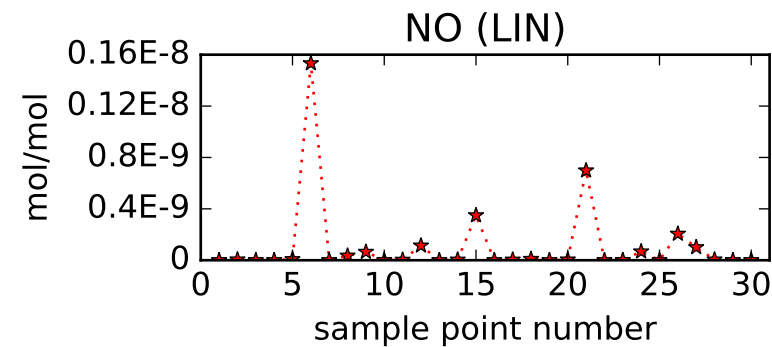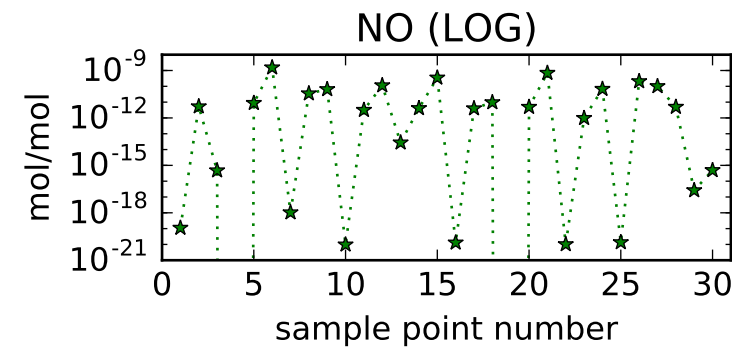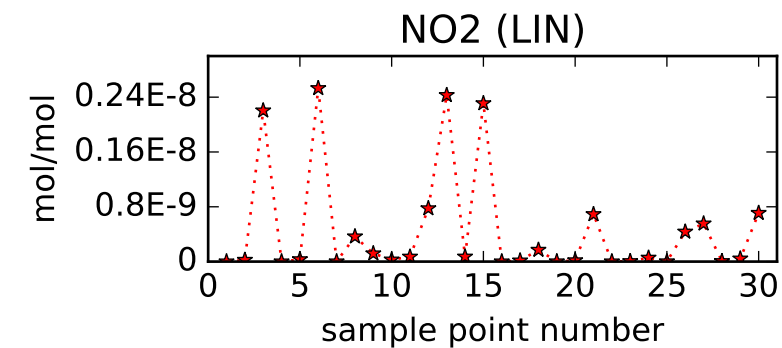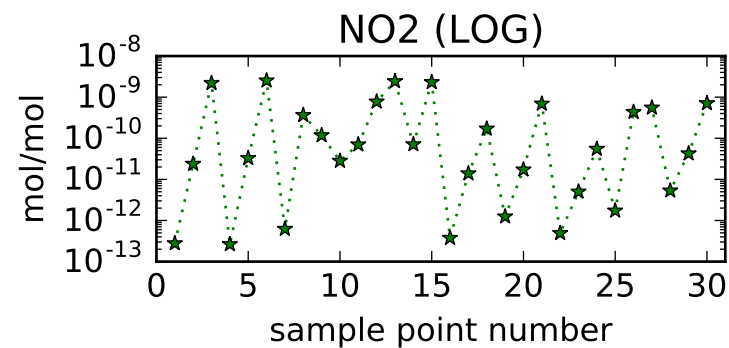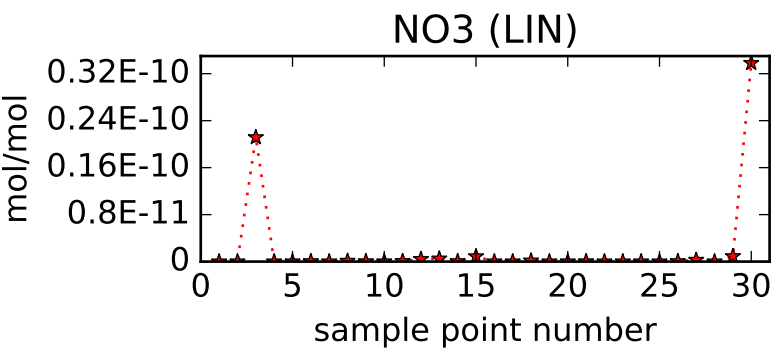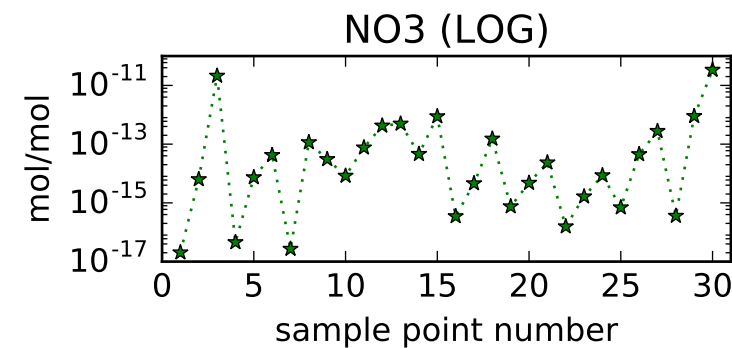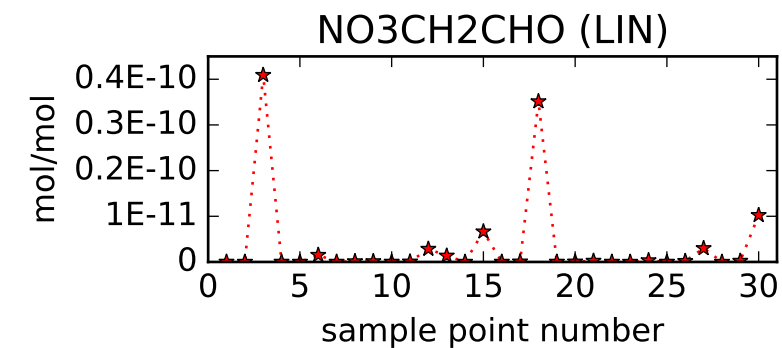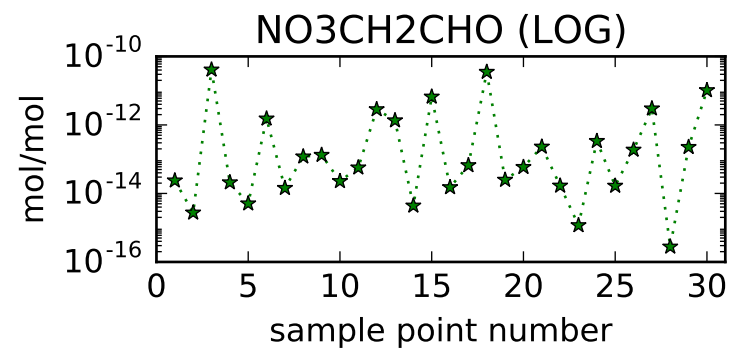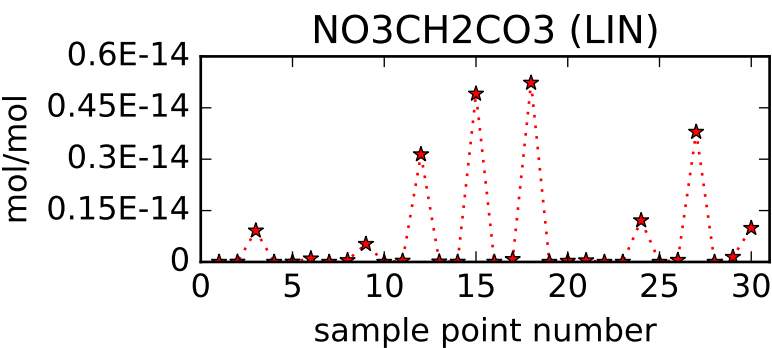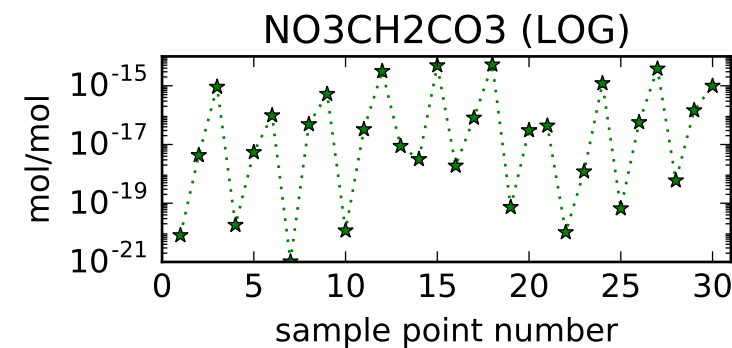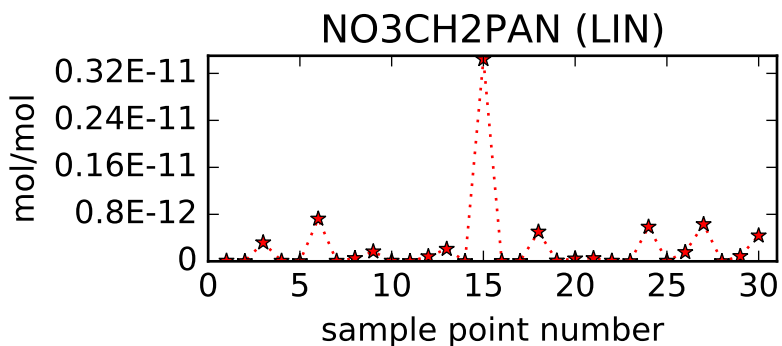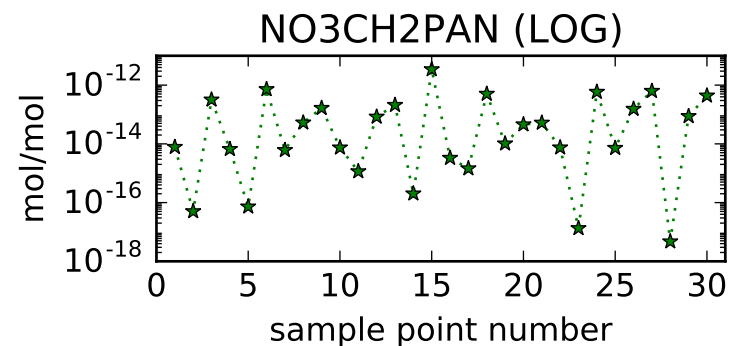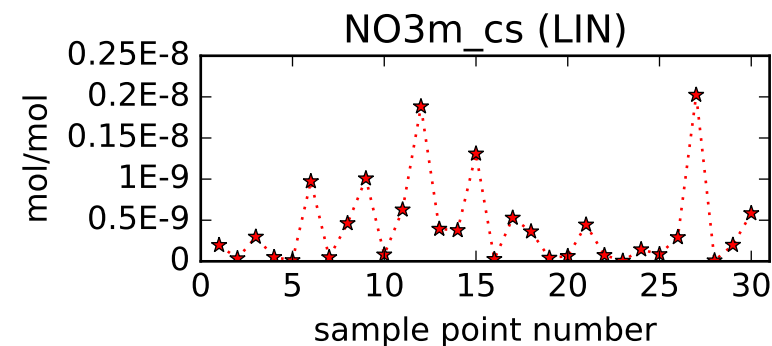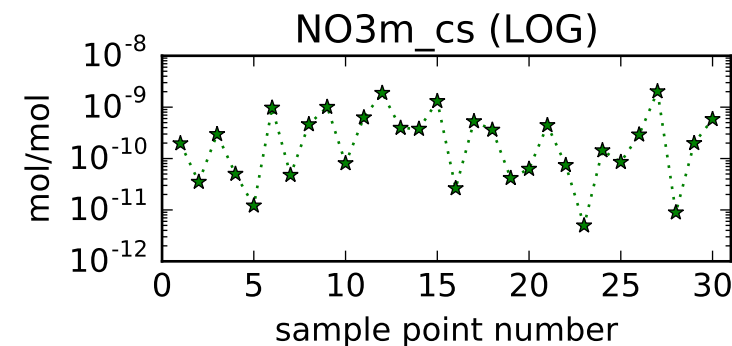

NOA (LIN)

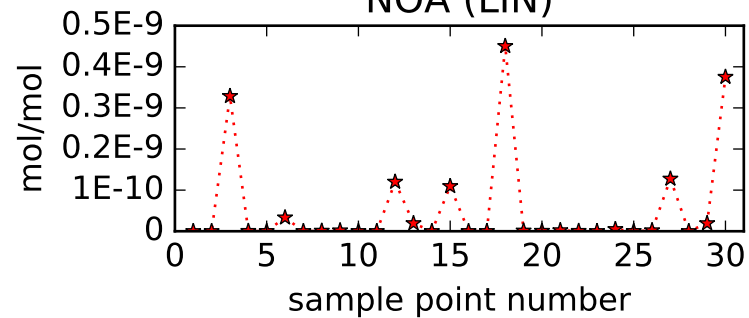

NOA (LOG)

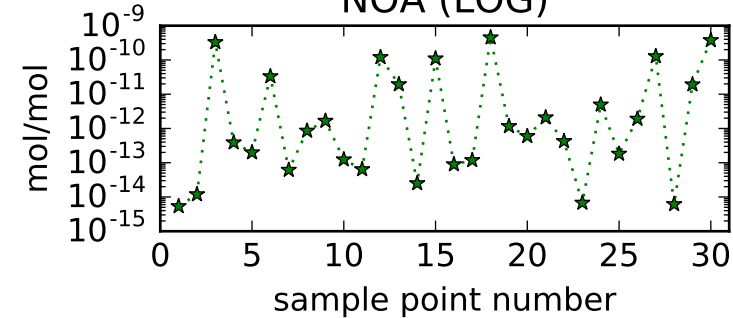

NOPINDCO (LIN)

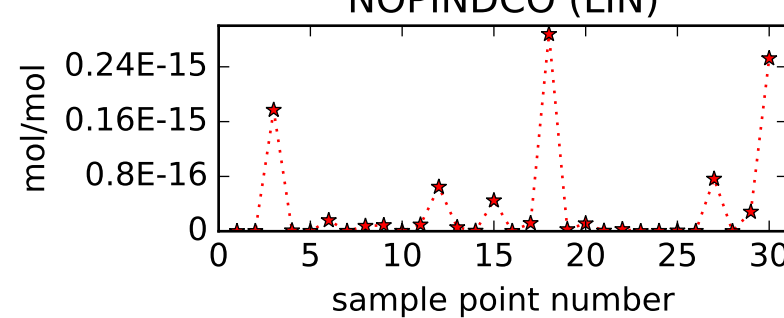

NOPINDCO (LOG)

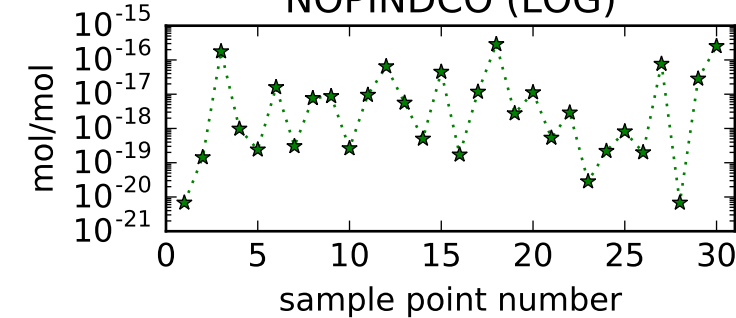

NOPINDO2 (LIN)

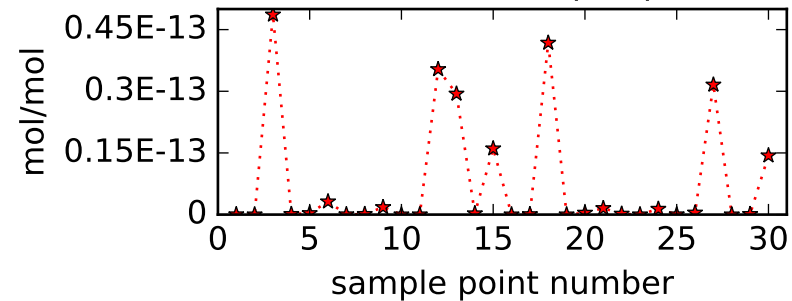

NOPINDO2 (LOG)

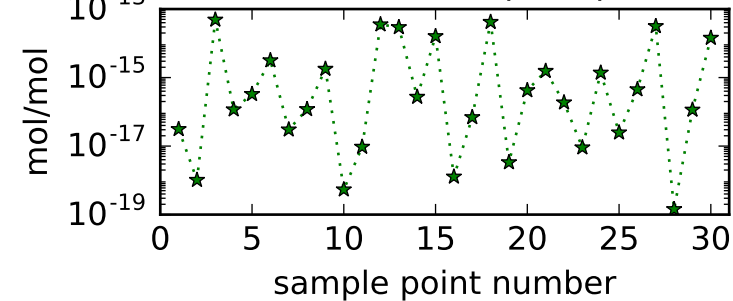

NOPINDOOH (LIN)

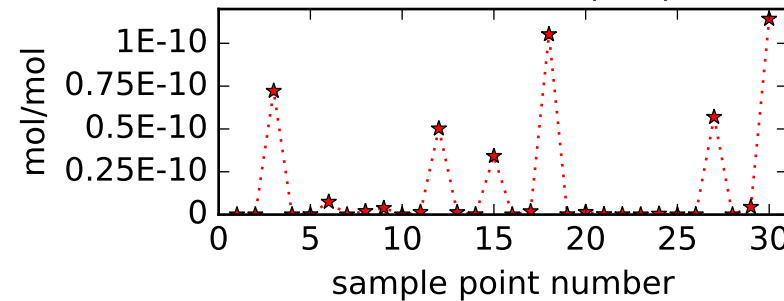

NOPINDOOH (LOG)

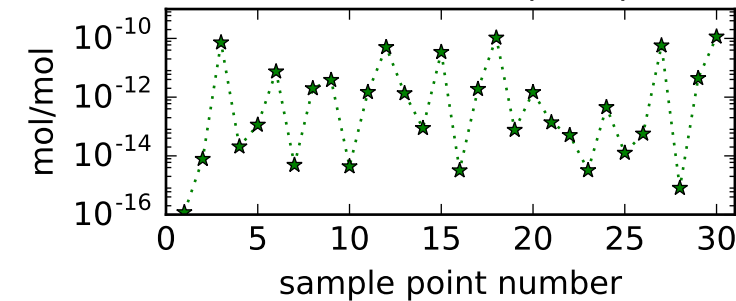

NOPINONE (LIN)

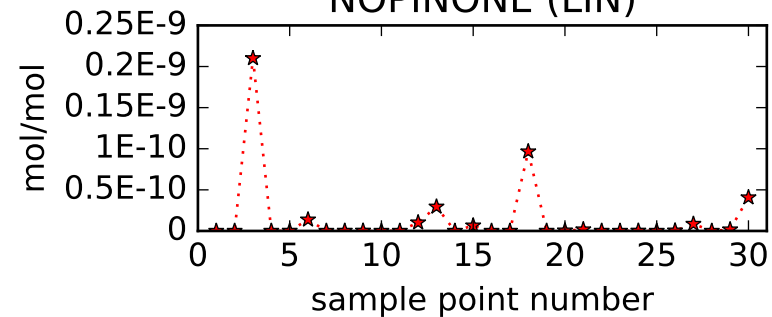

NOPINONE (LOG)

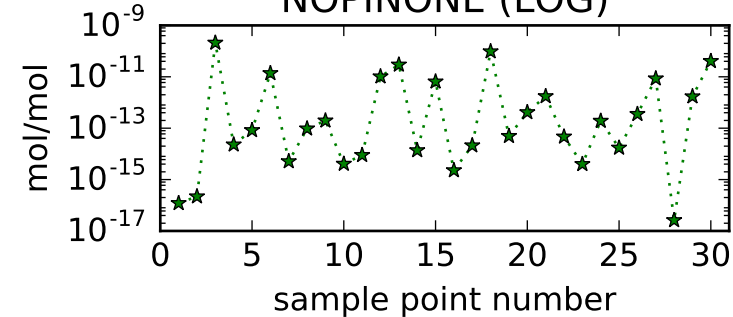

NOPINOO (LIN)

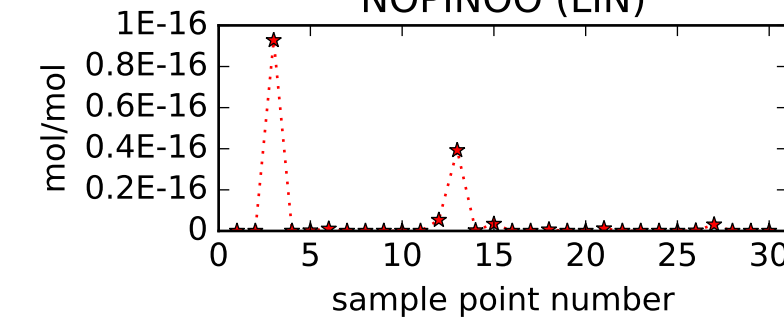

NOPINOO (LOG)

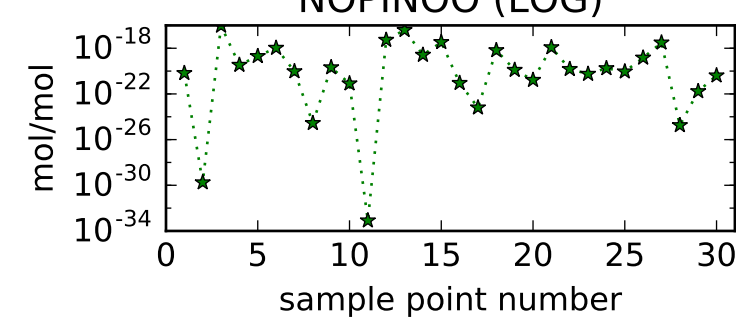

NORPINAL (LIN)

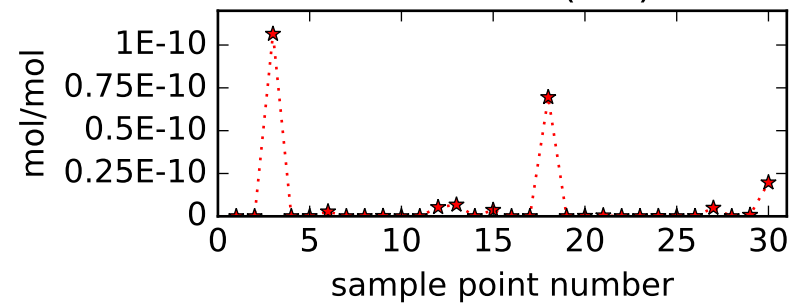

NORPINAL (LOG)

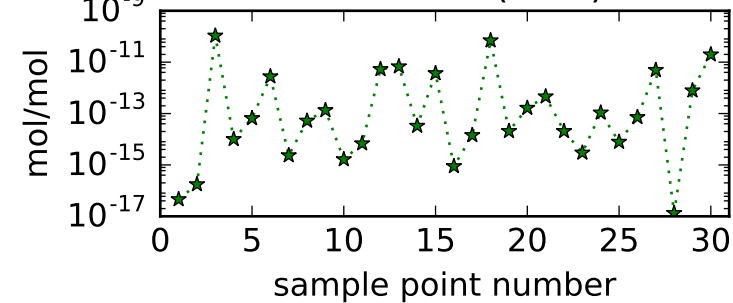

NORPINENOL (LIN)

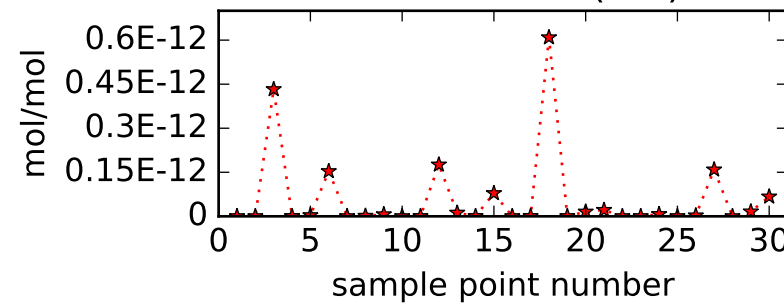

NORPINENOL (LOG)

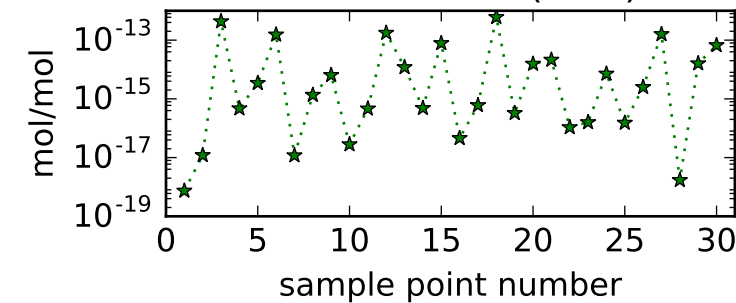

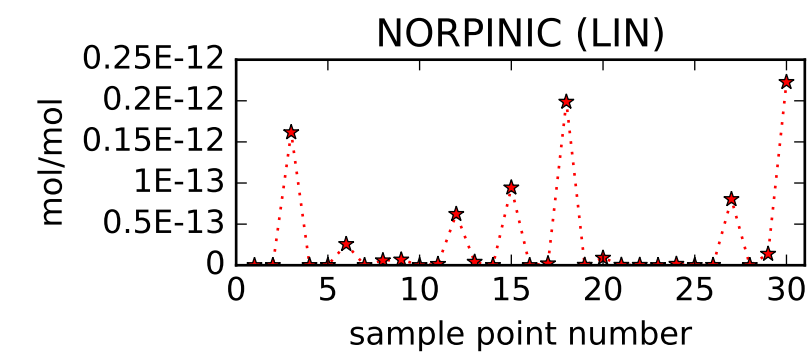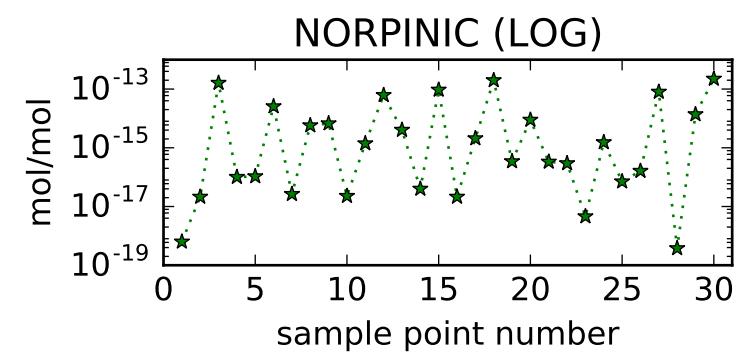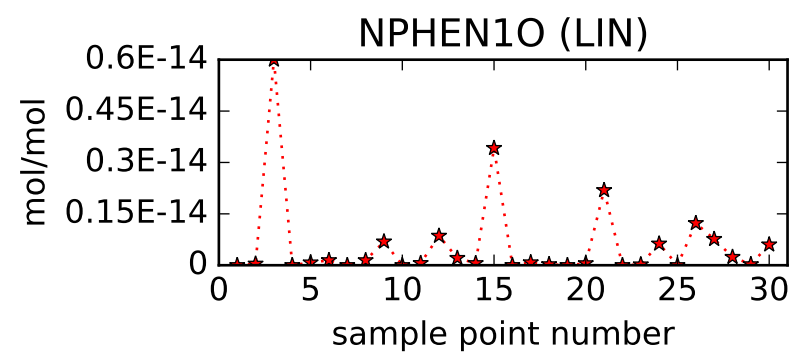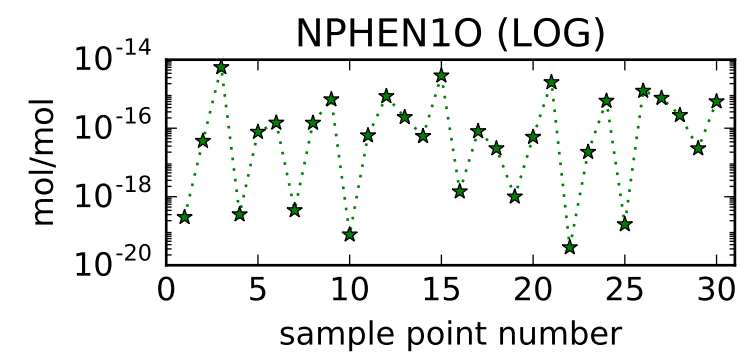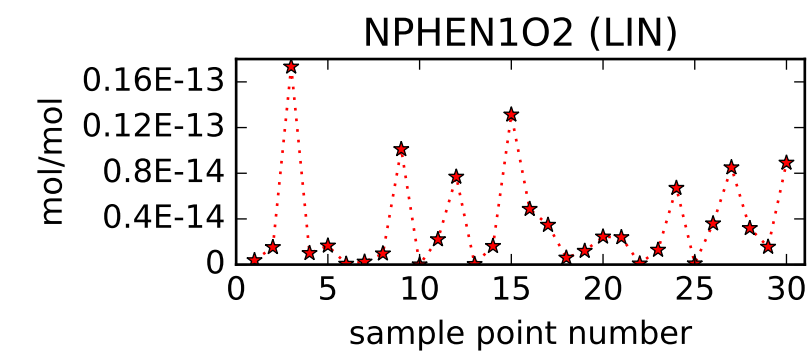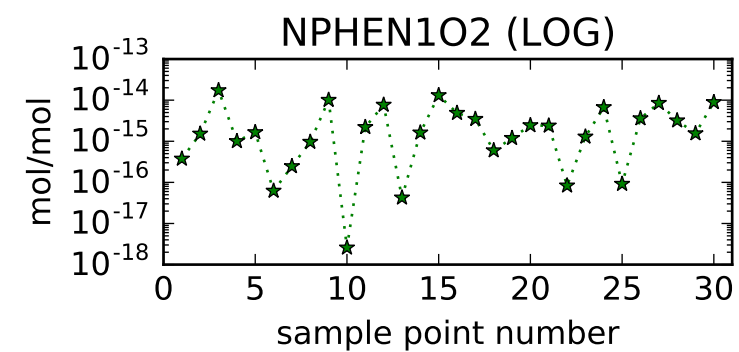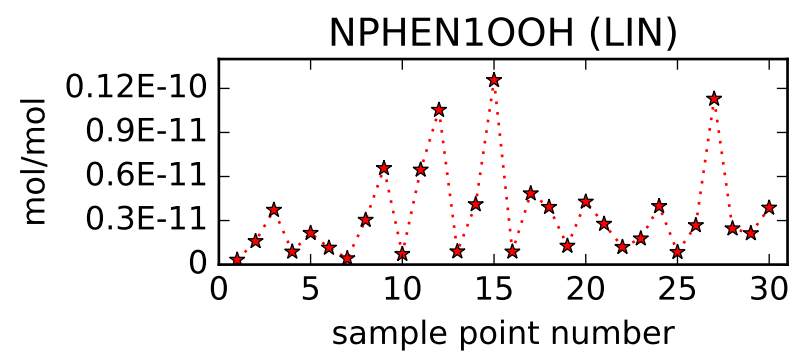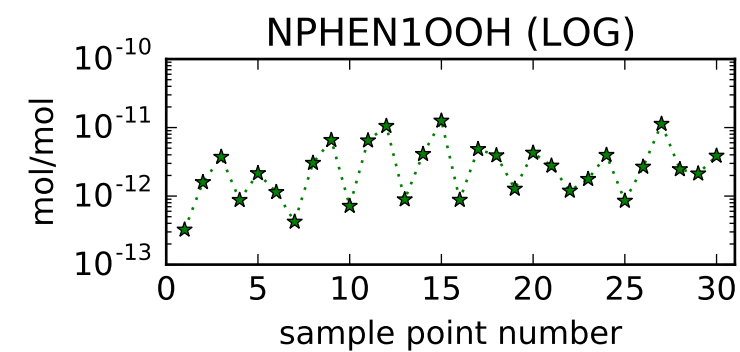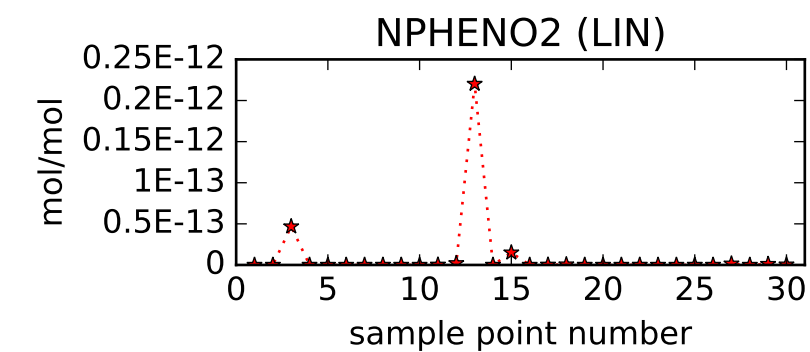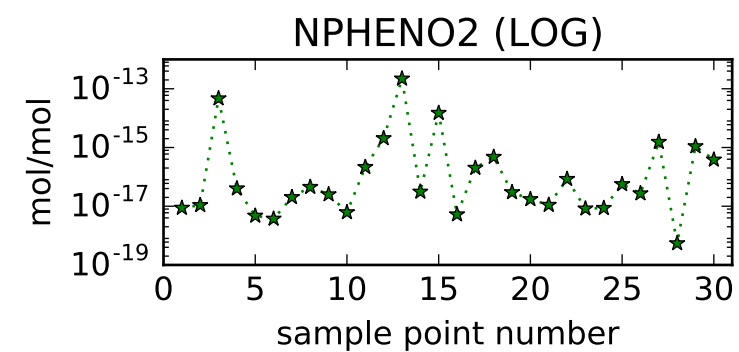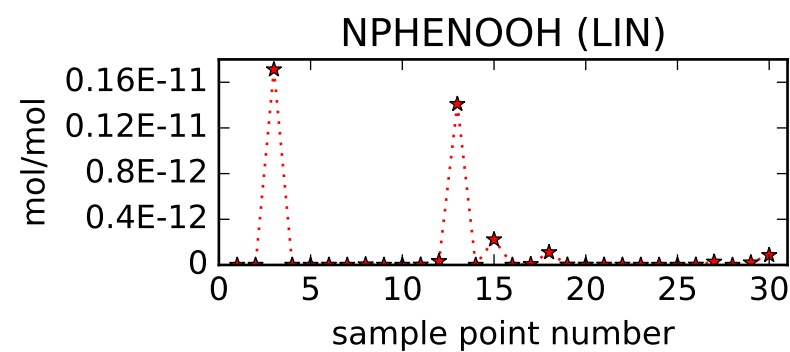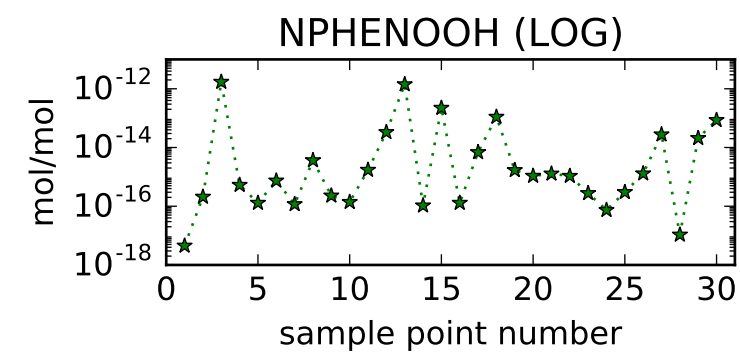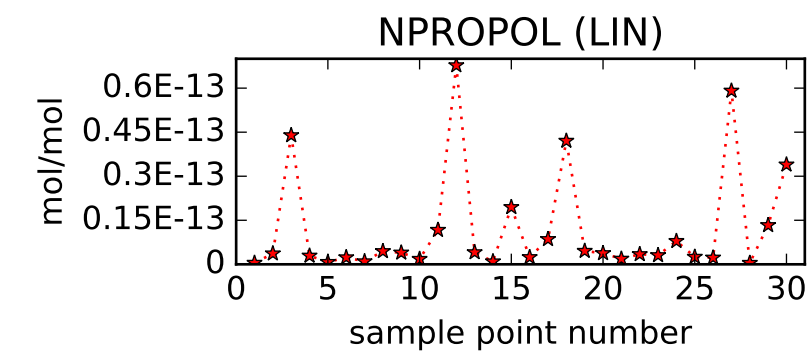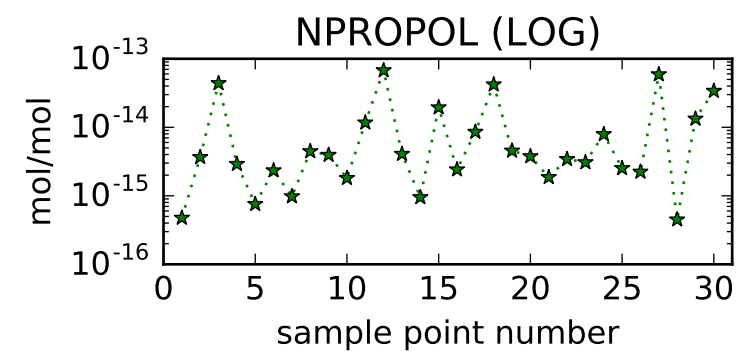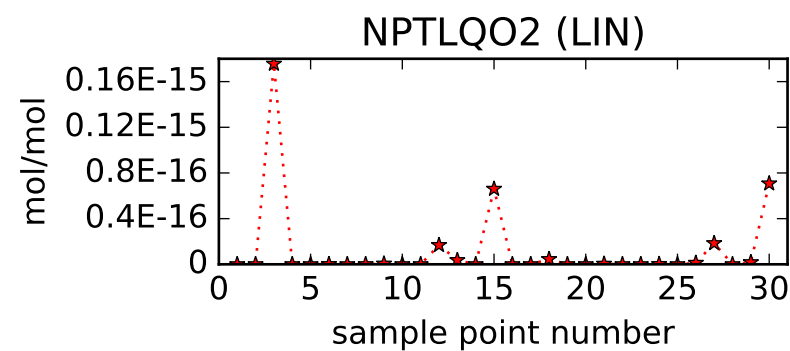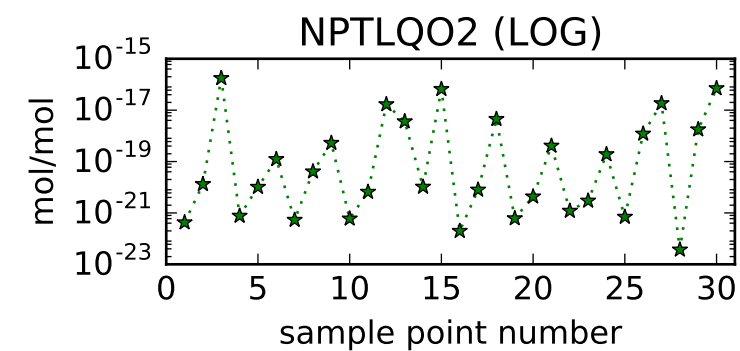



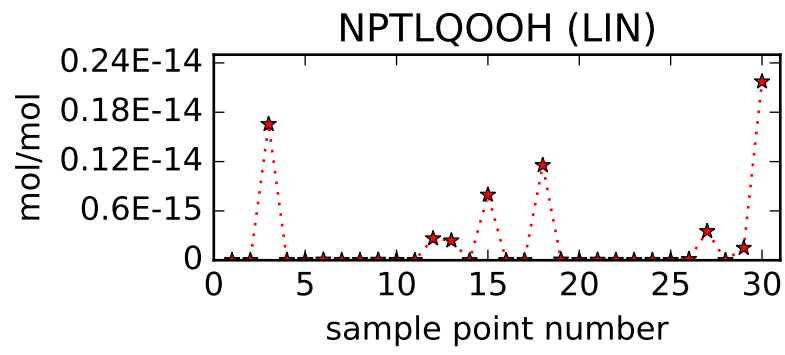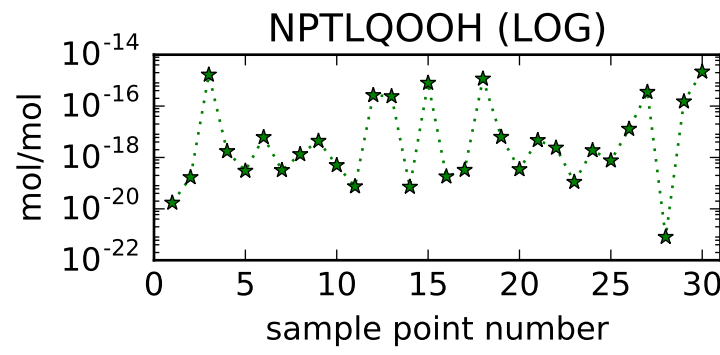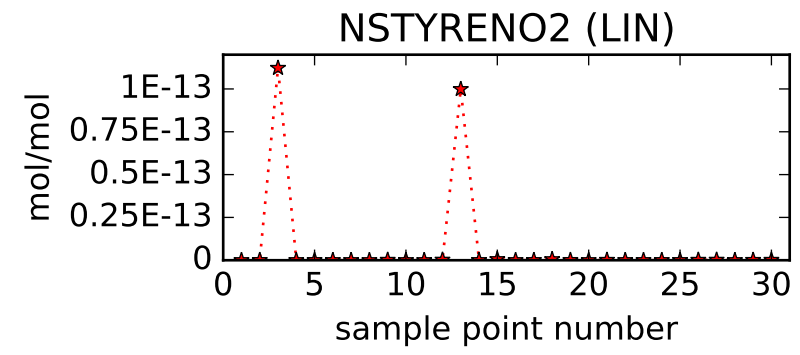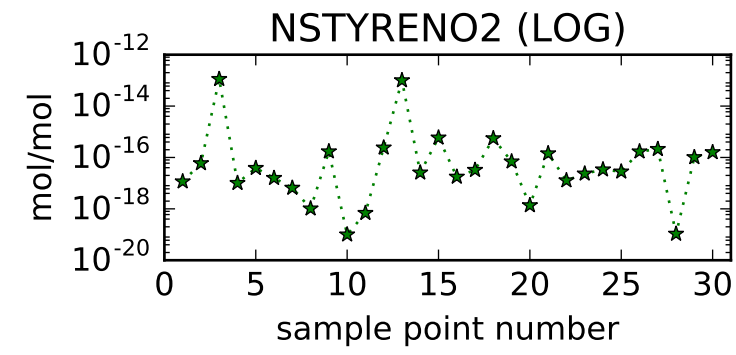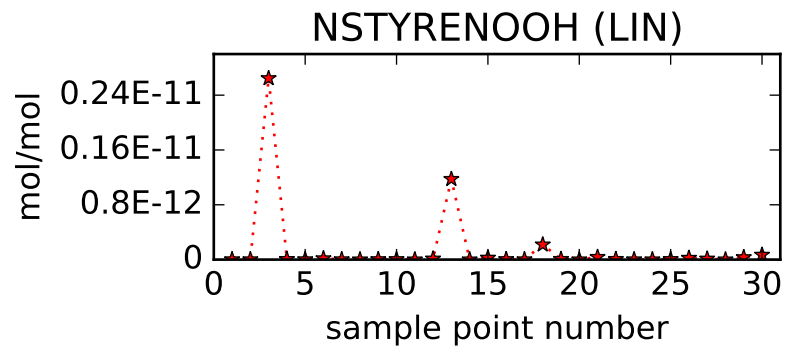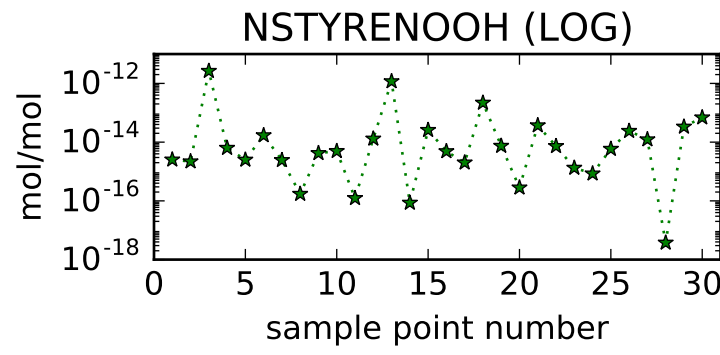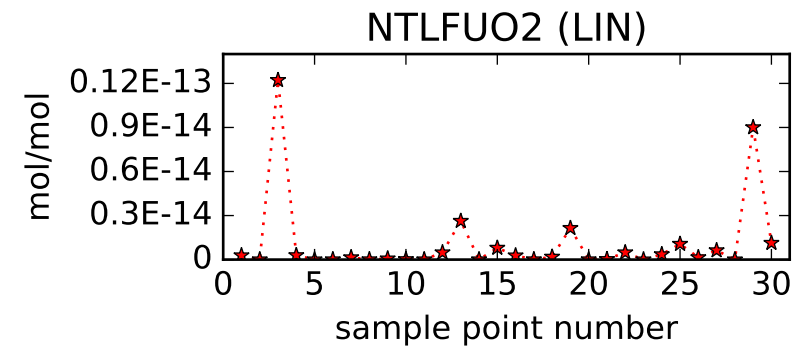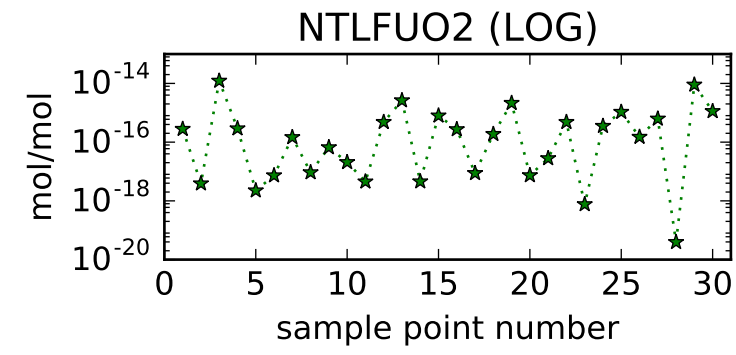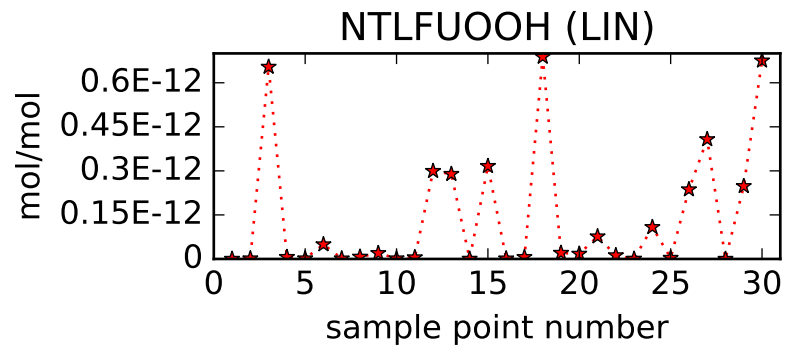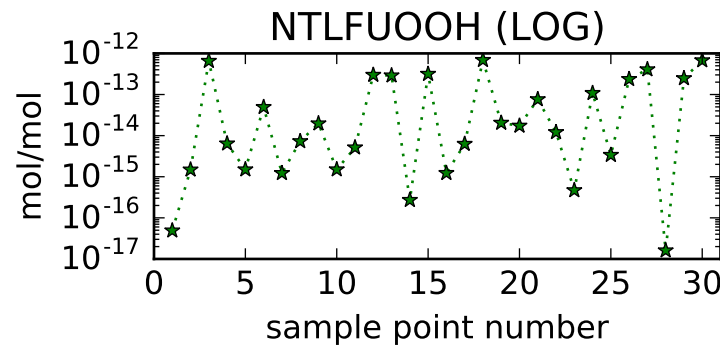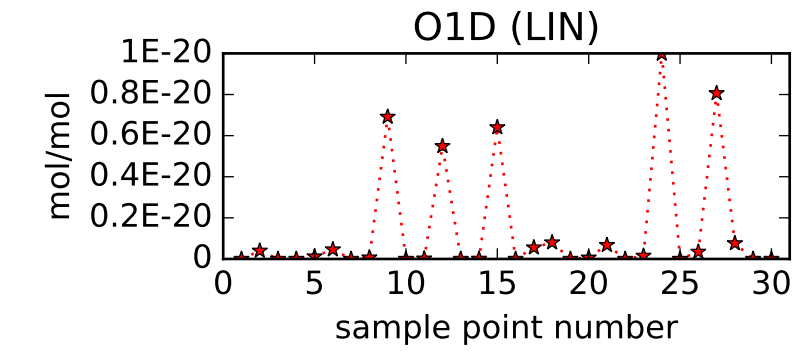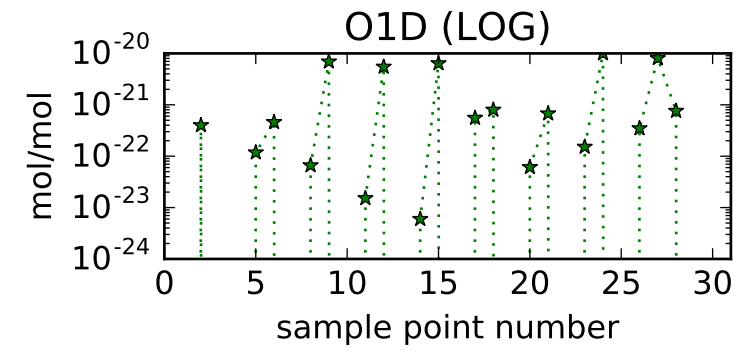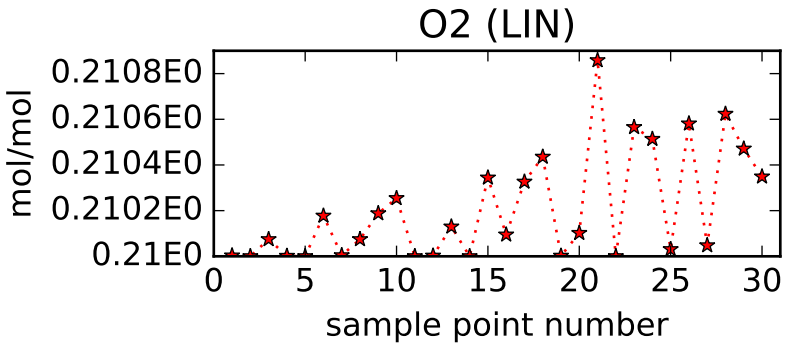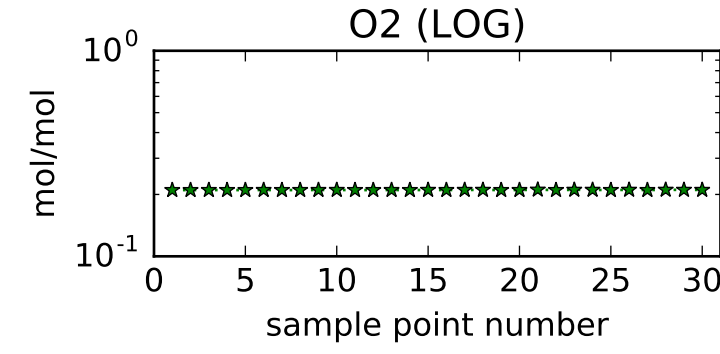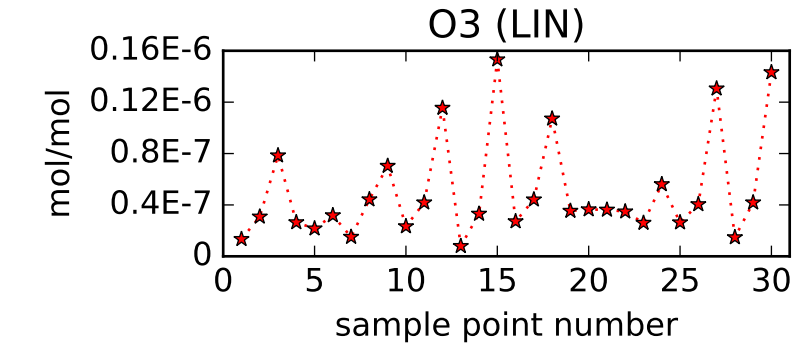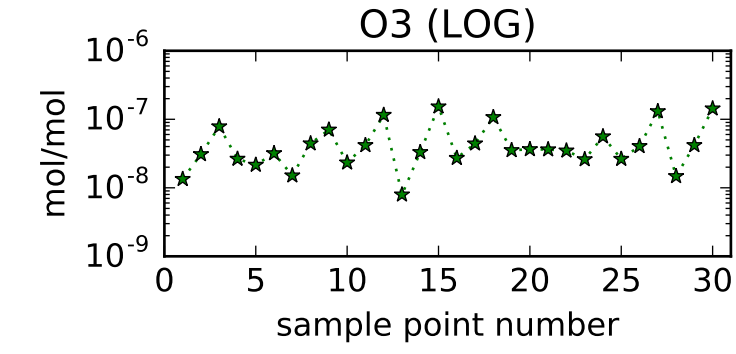

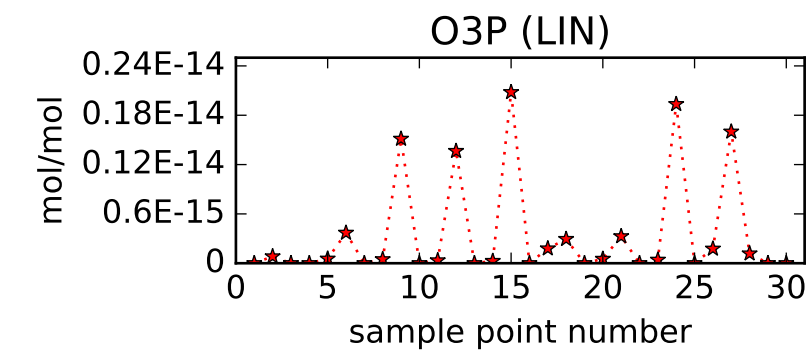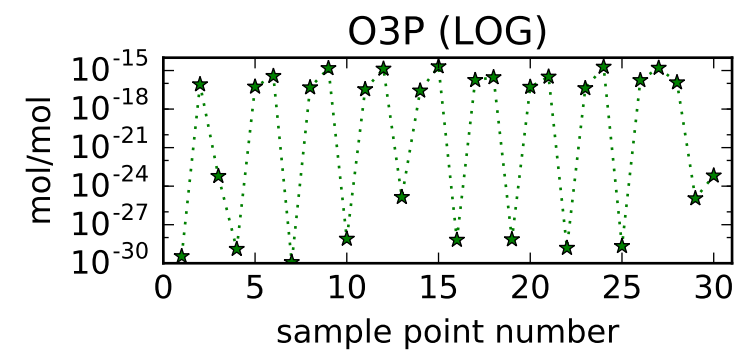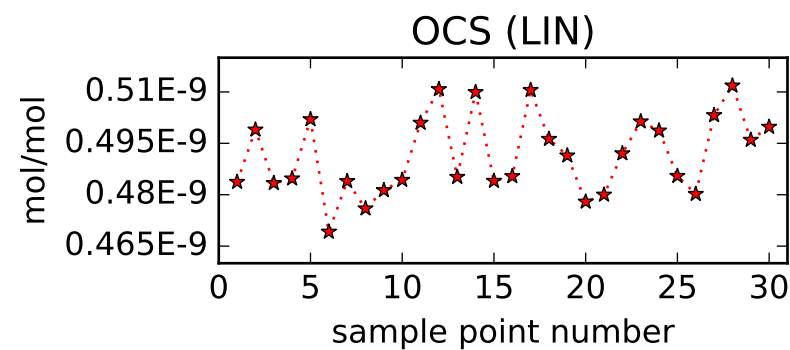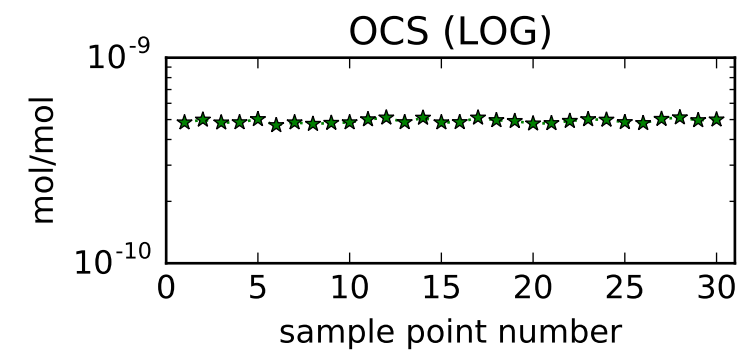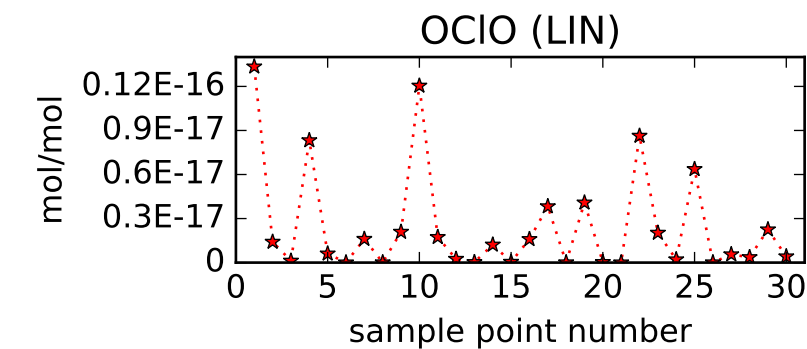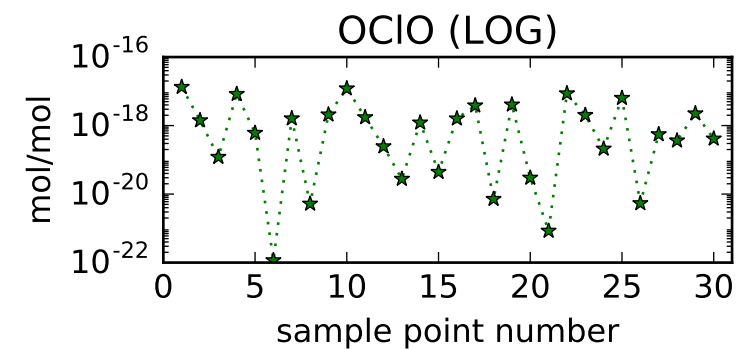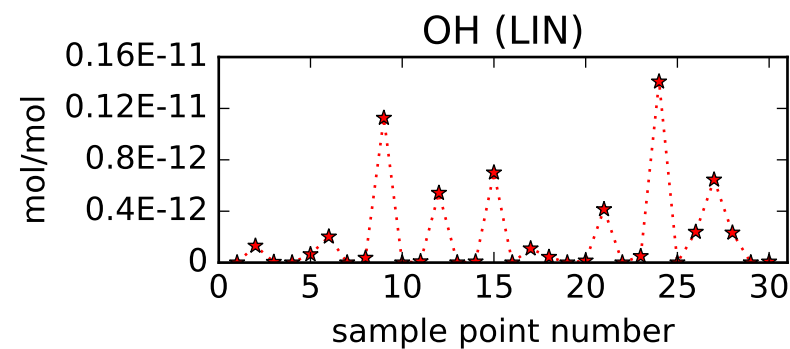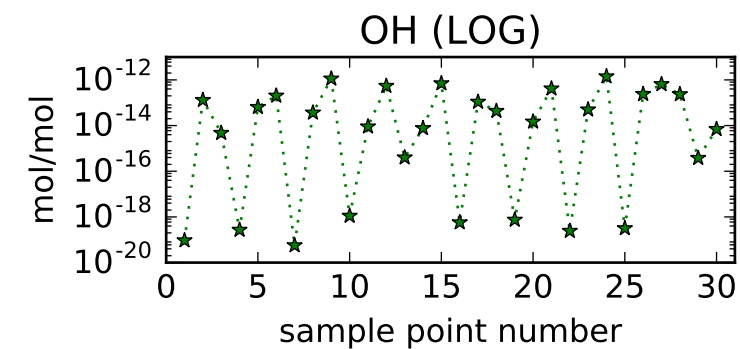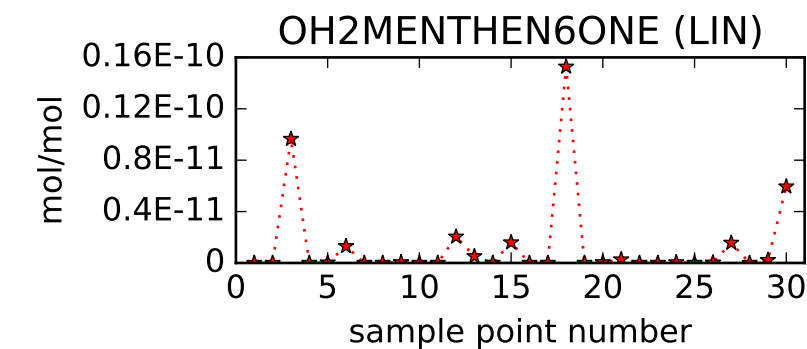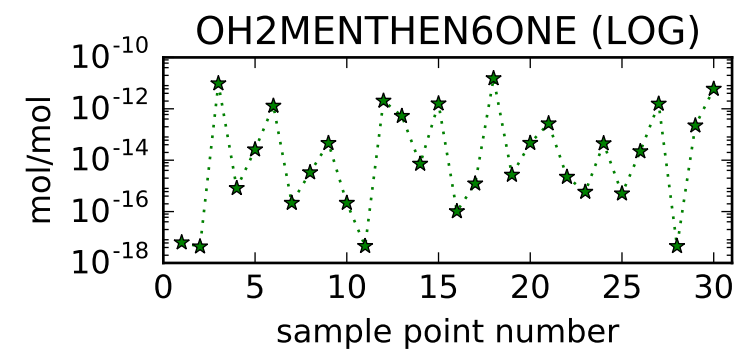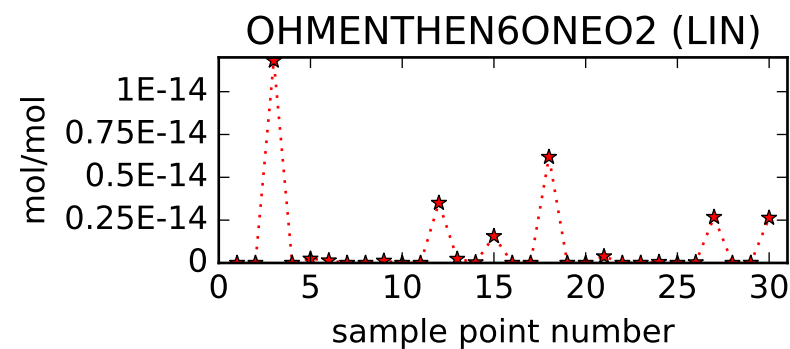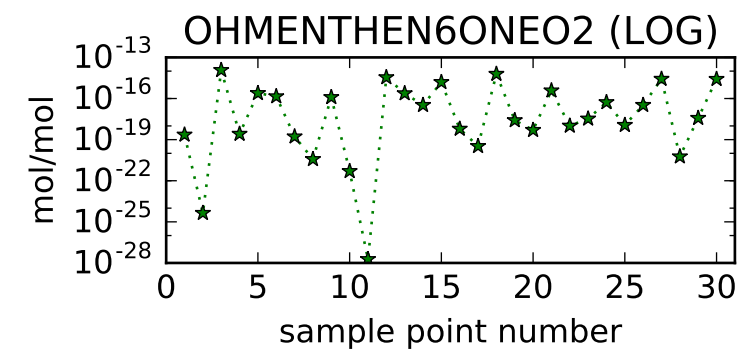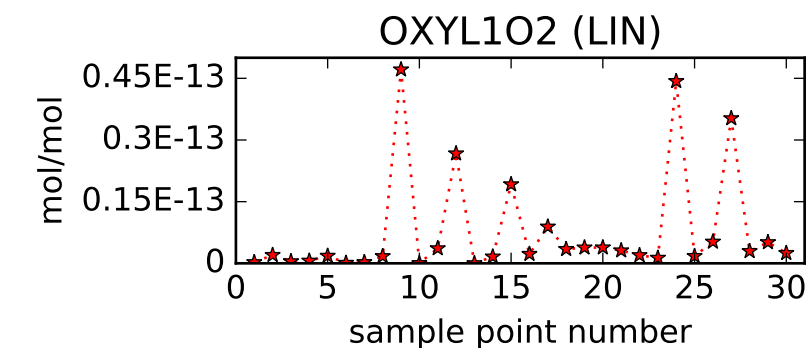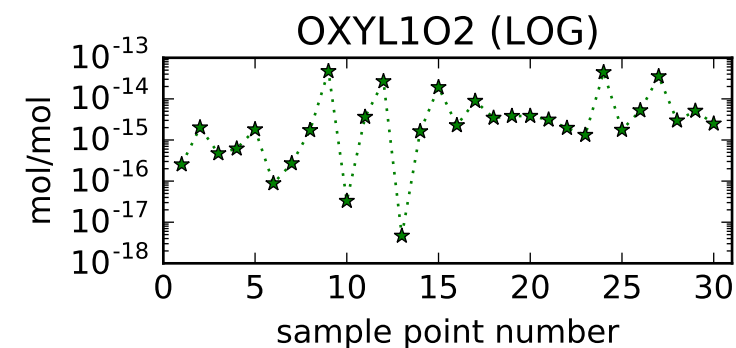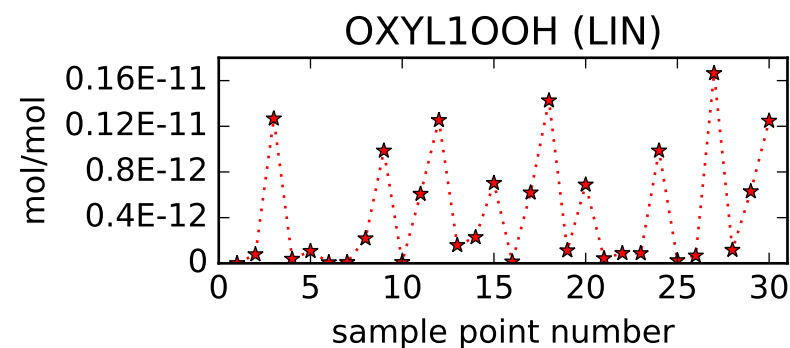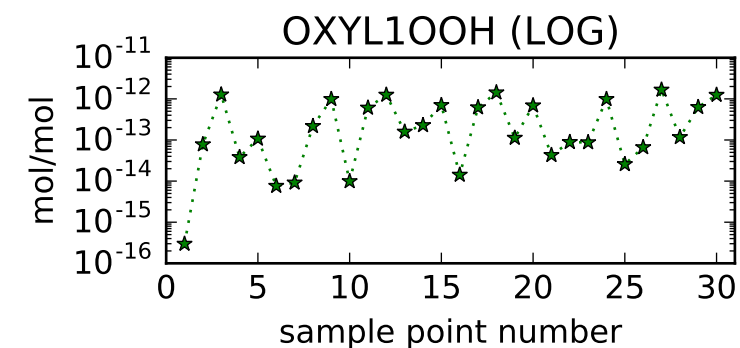

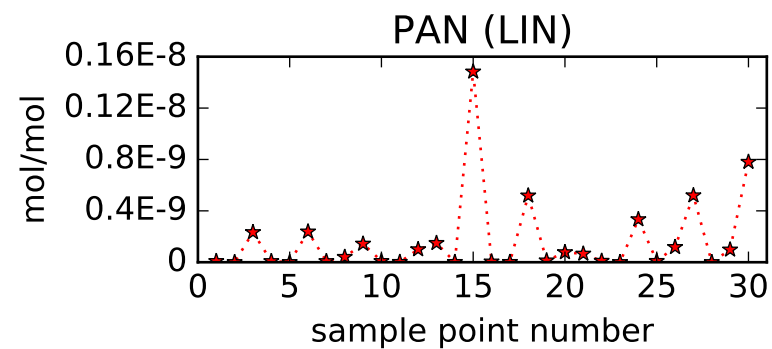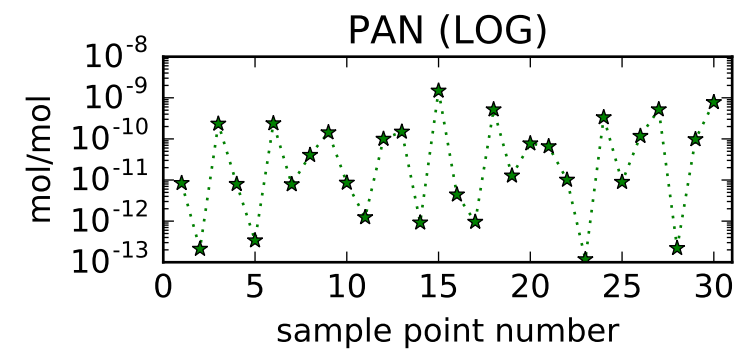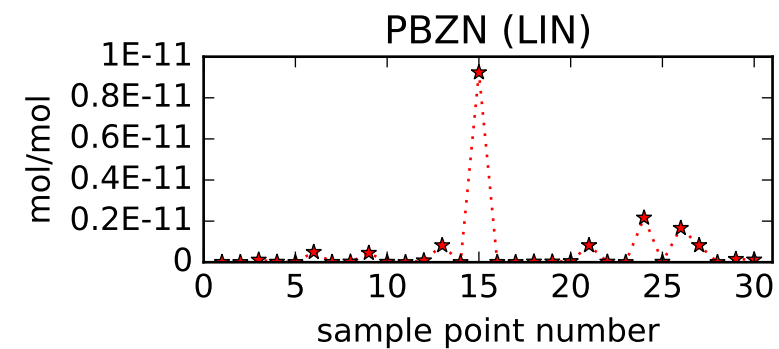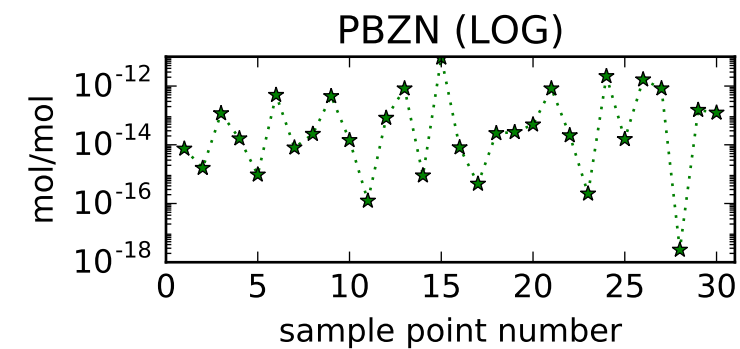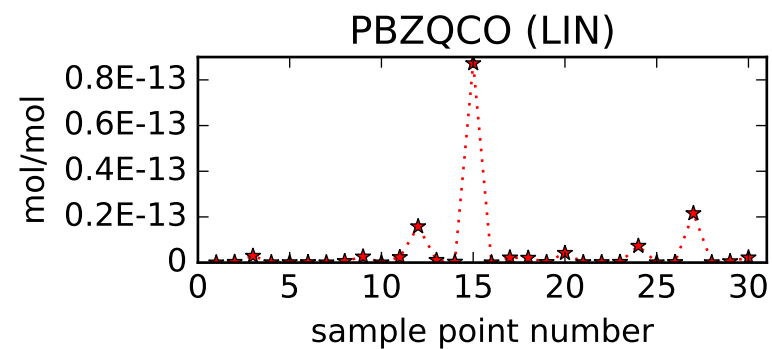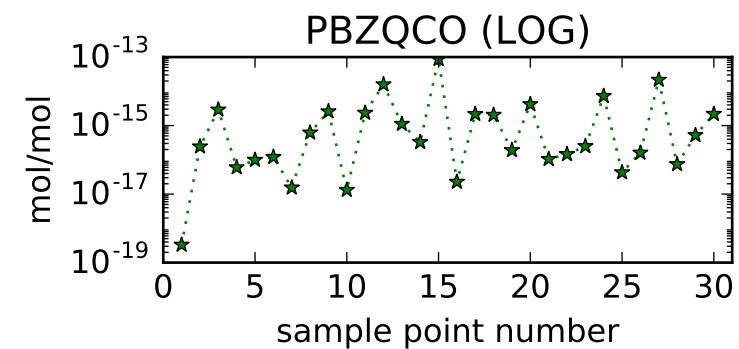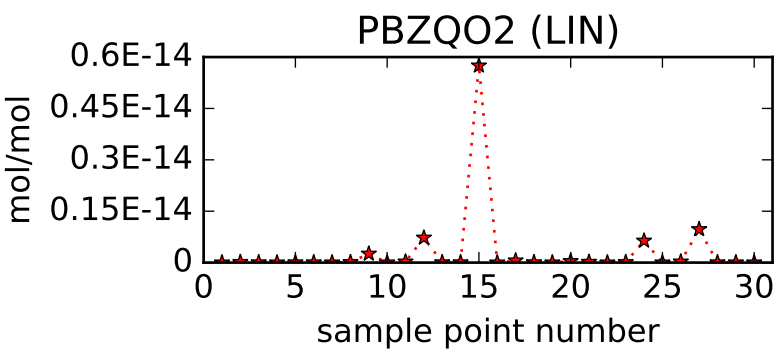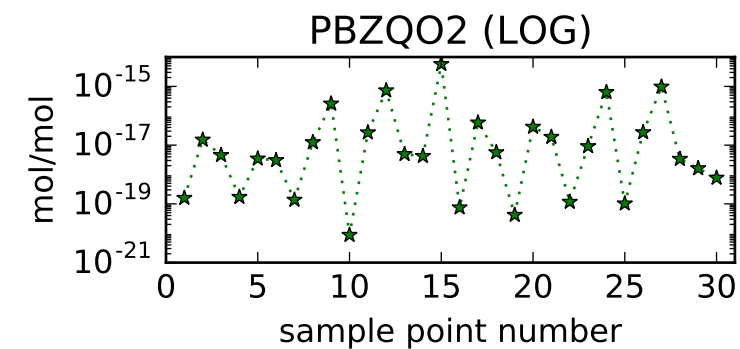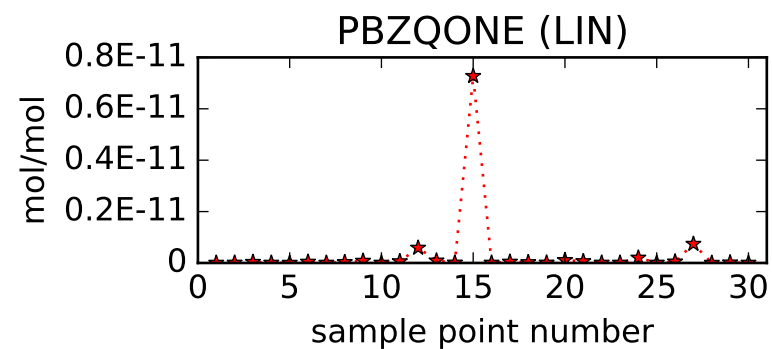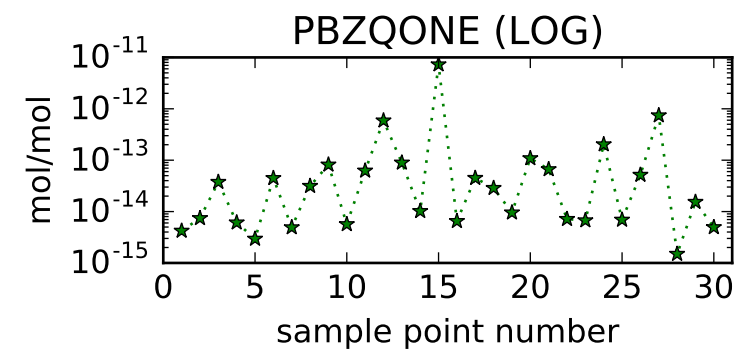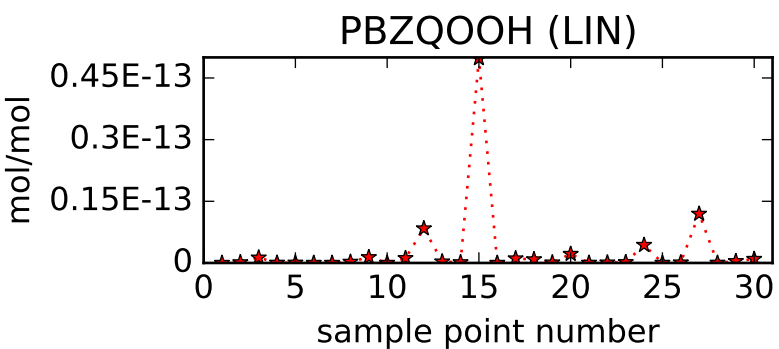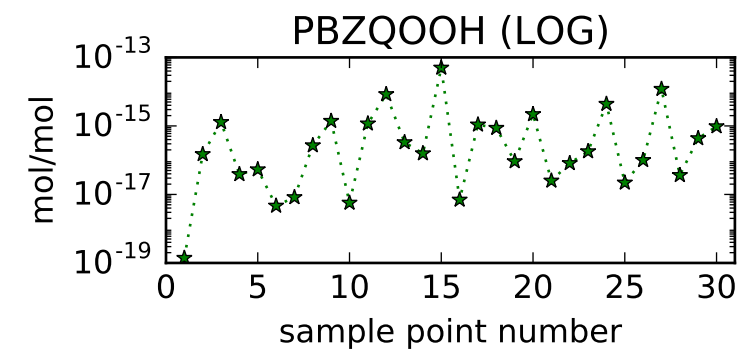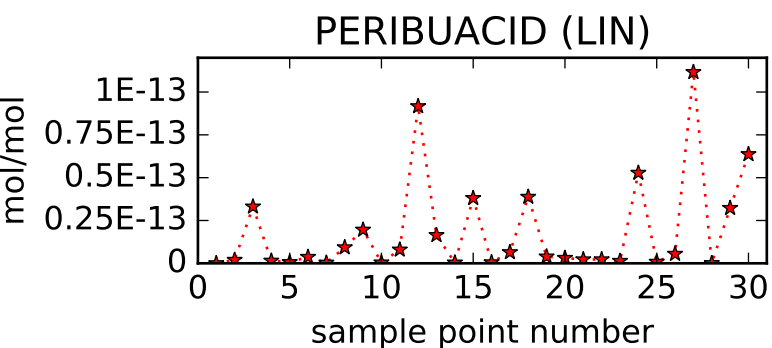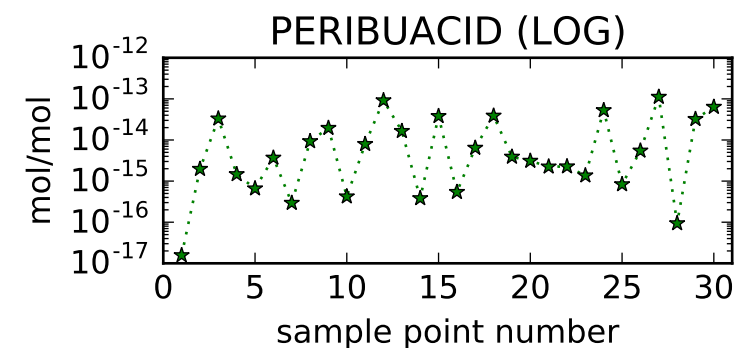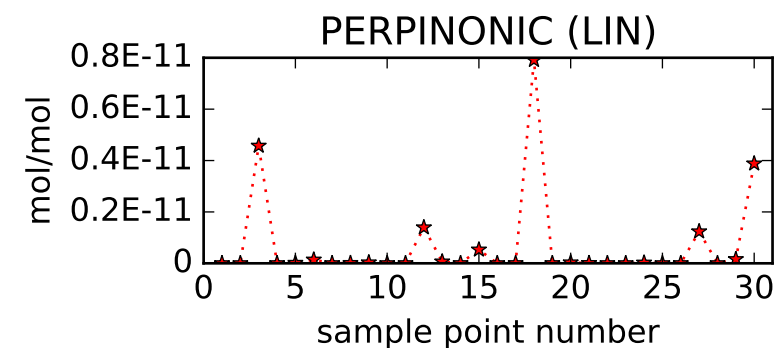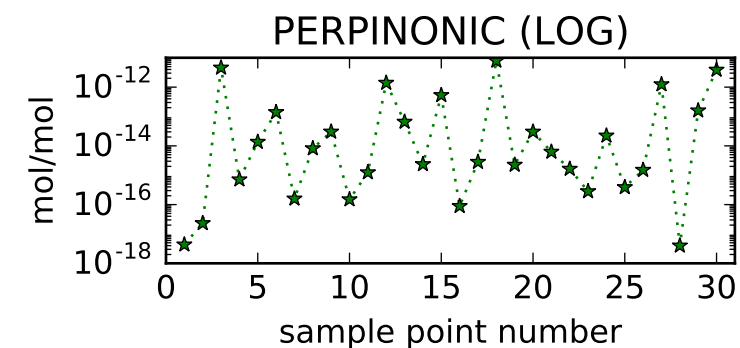

PHAN (LIN)

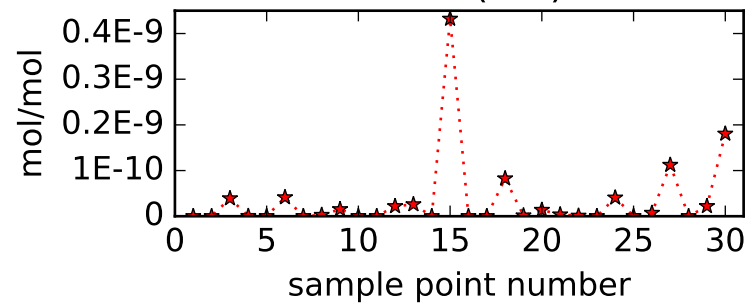

PHAN (LOG)

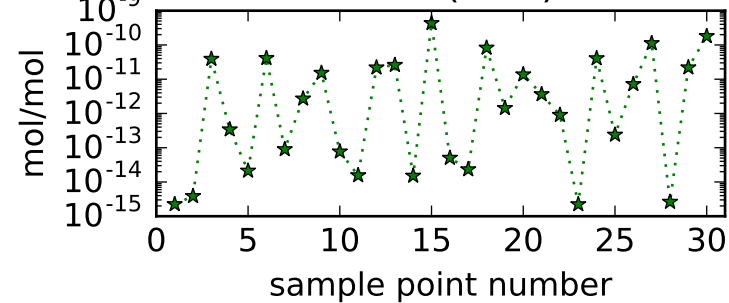

PHCOOH (LIN)

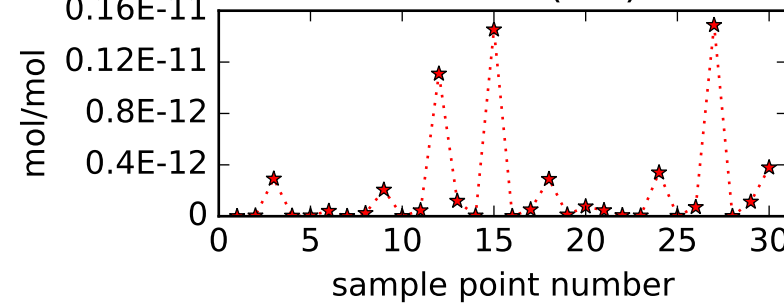

PHCOOH (LOG)

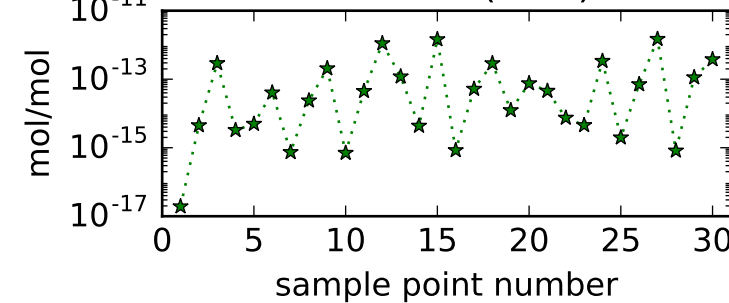

PHENO2 (LIN)

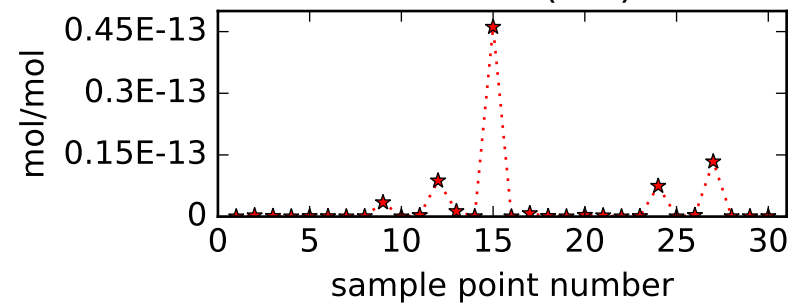

PHENO2 (LOG)

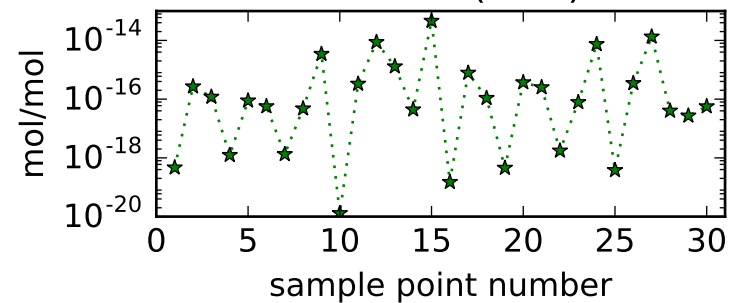

PHENOL (LIN)

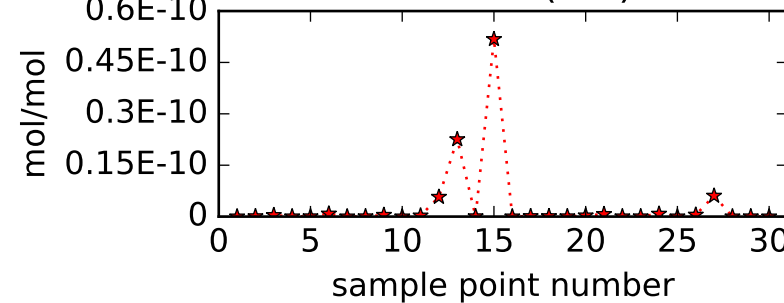

PHENOL (LOG)

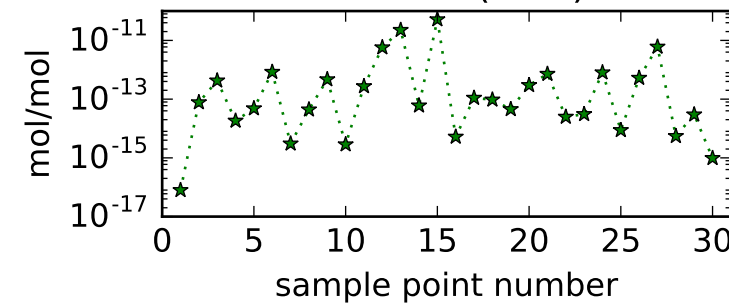

PHENOOH (LIN)

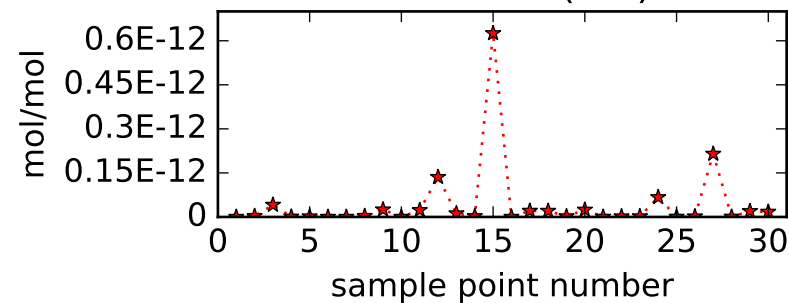

PHENOOH (LOG)

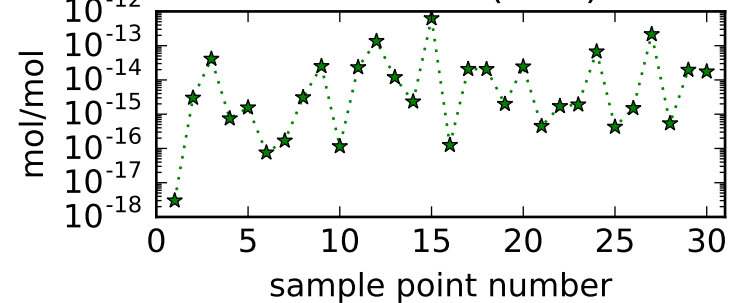

PINAL (LIN)

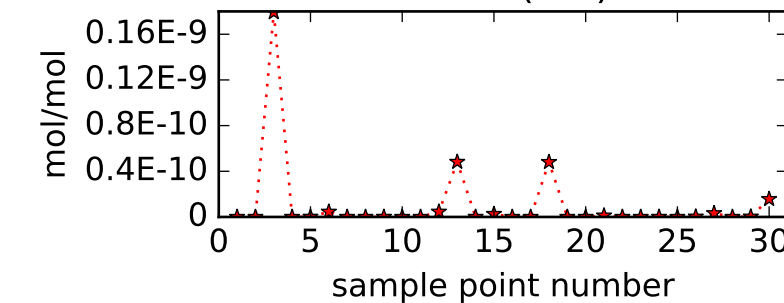

PINAL (LOG)

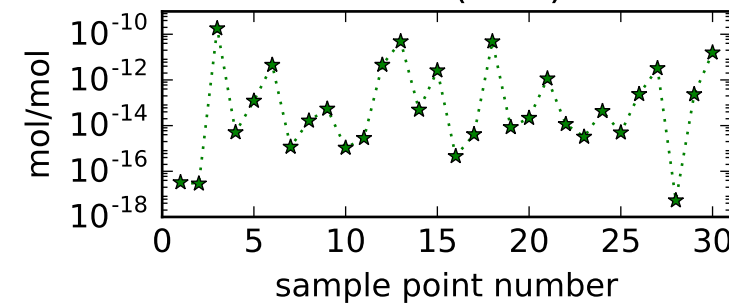

PINALNO3 (LIN)

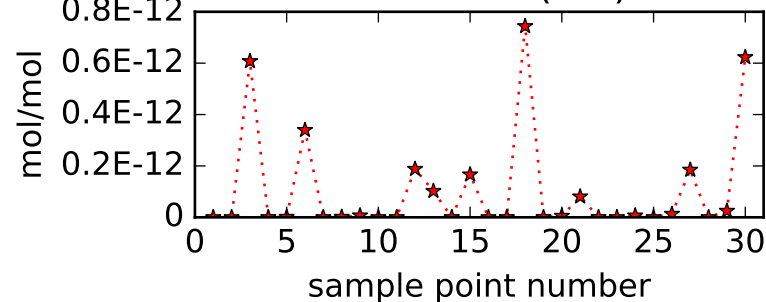

PINALNO3 (LOG)

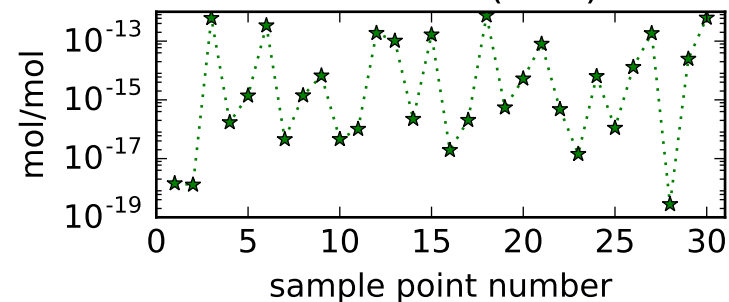

PINALO2 (LIN)

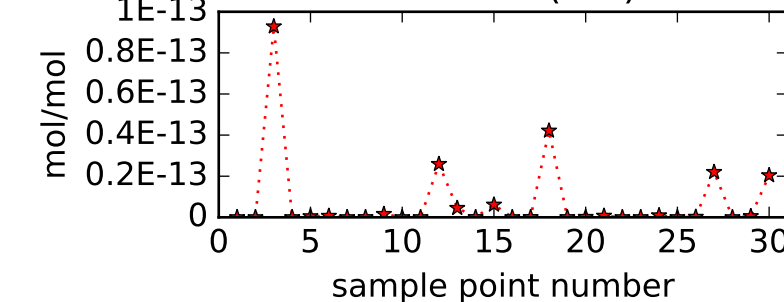

PINALO2 (LOG)

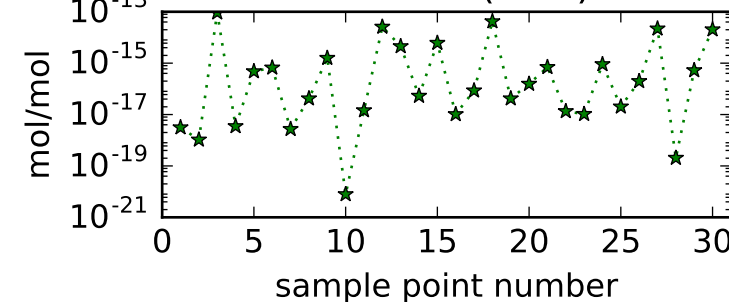

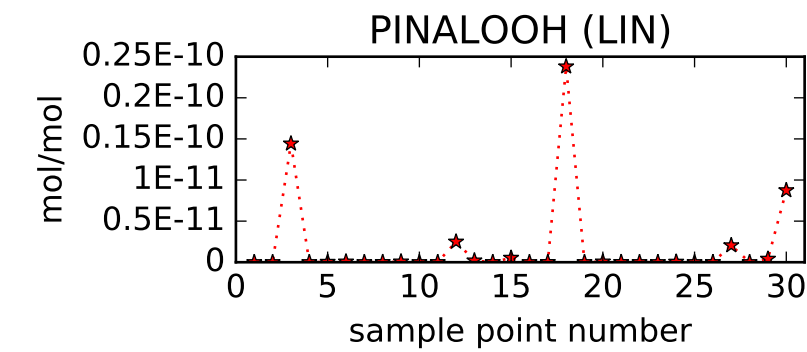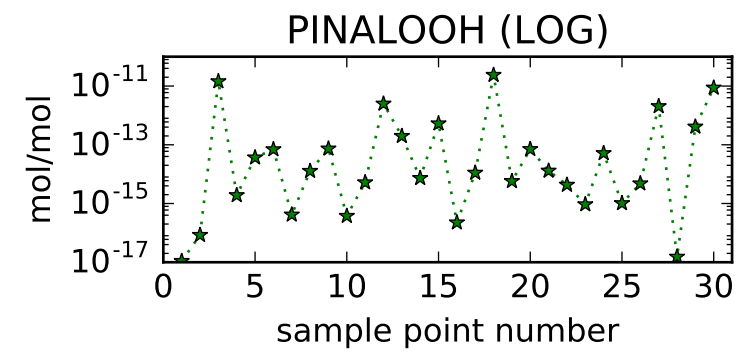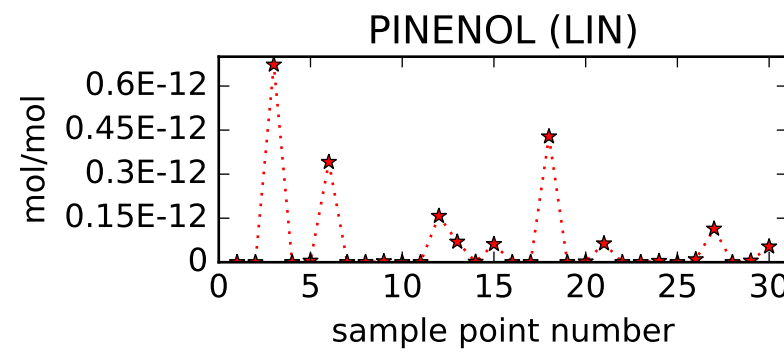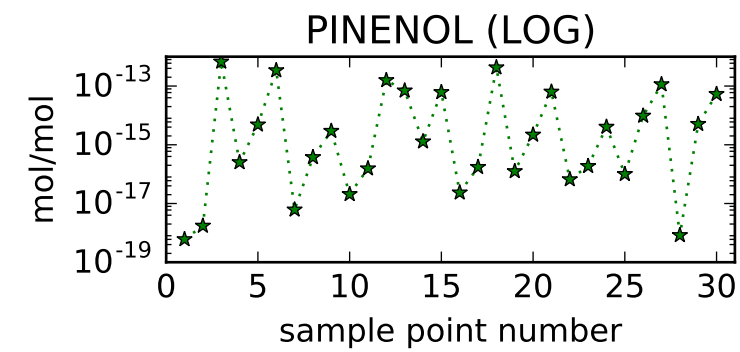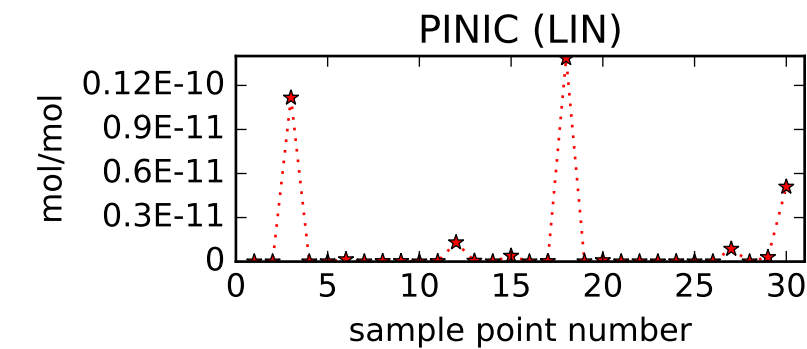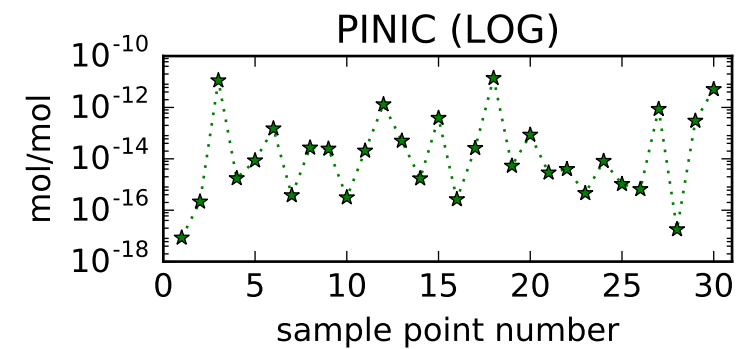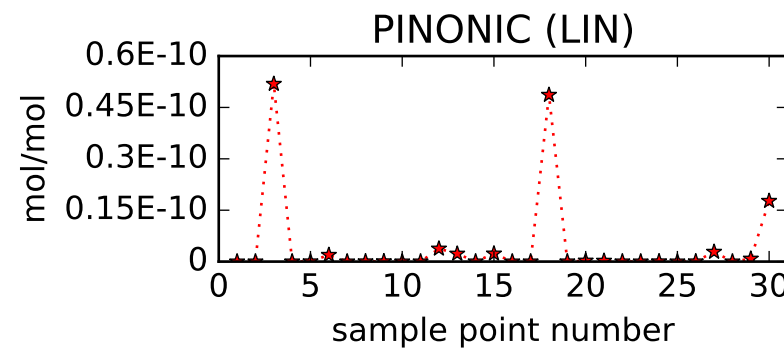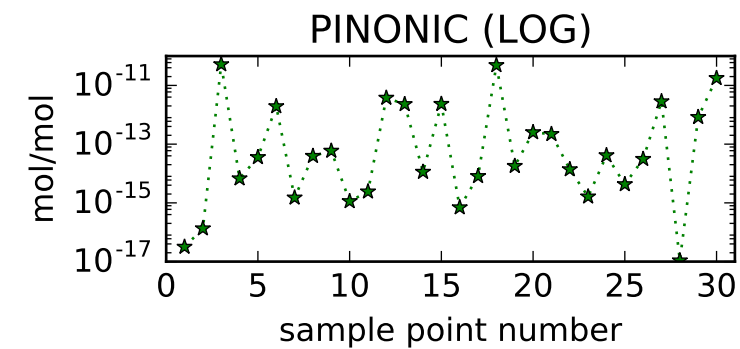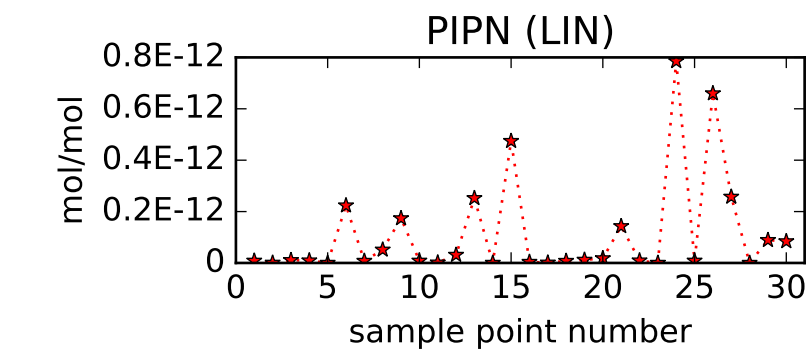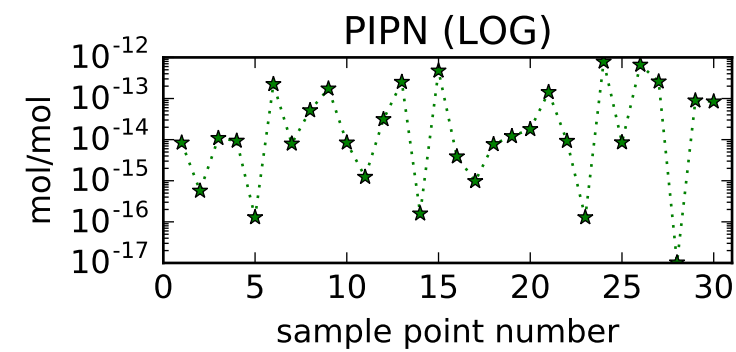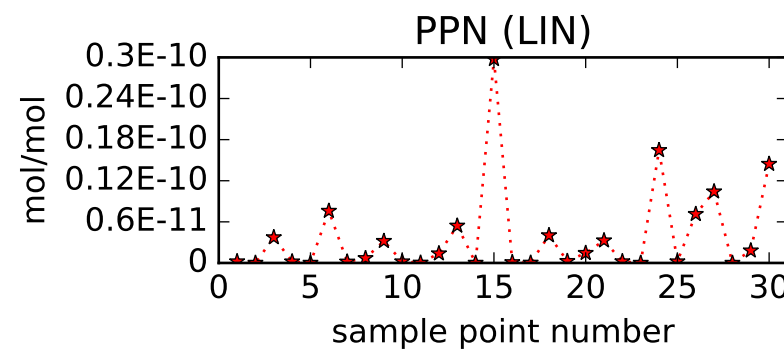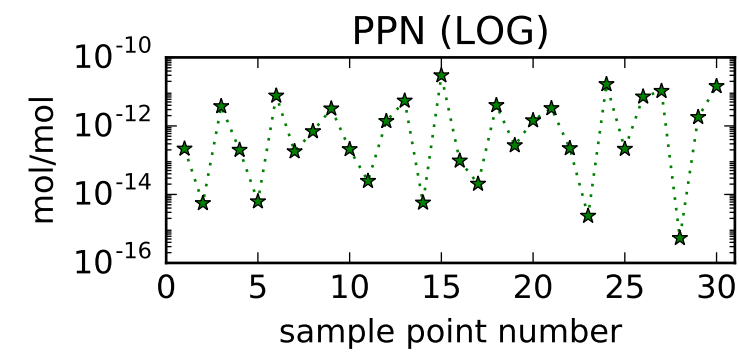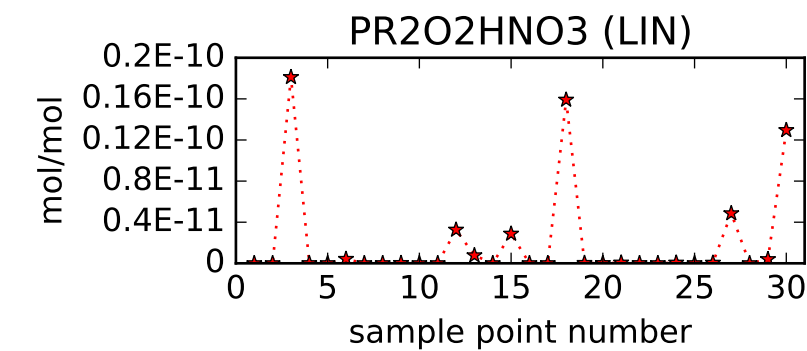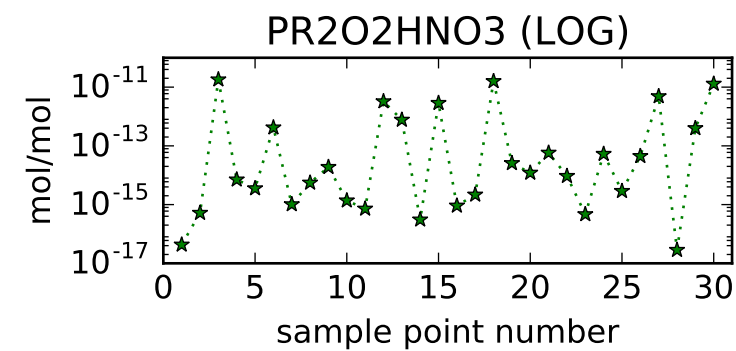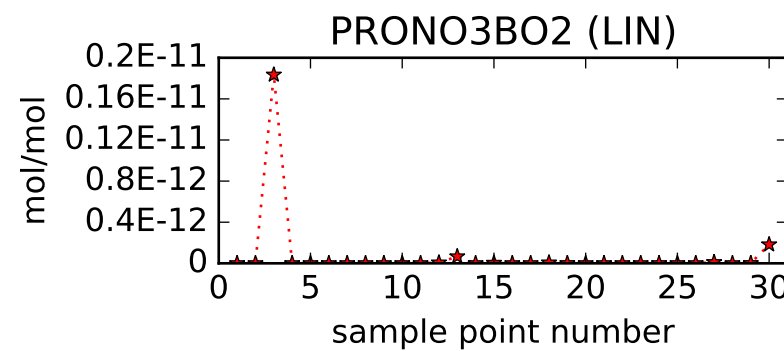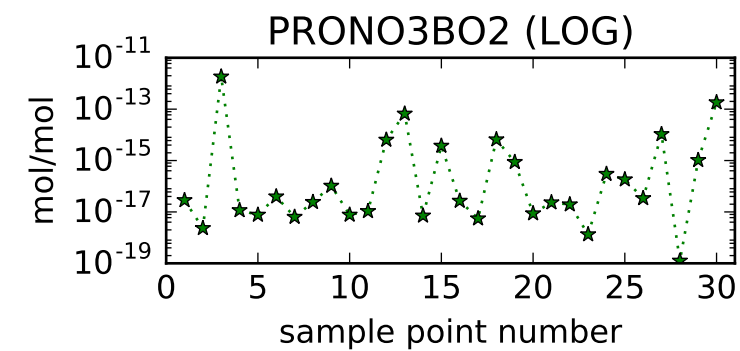



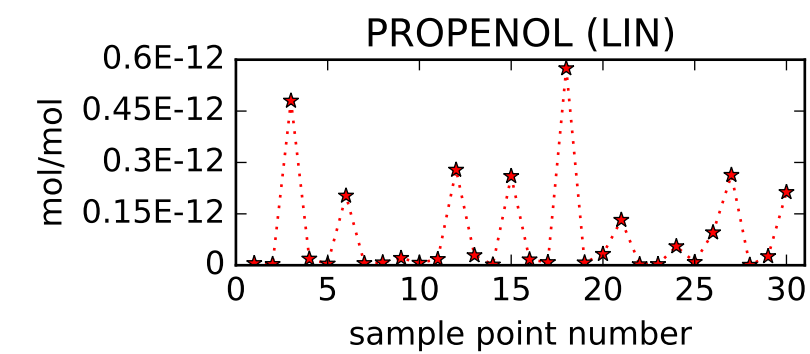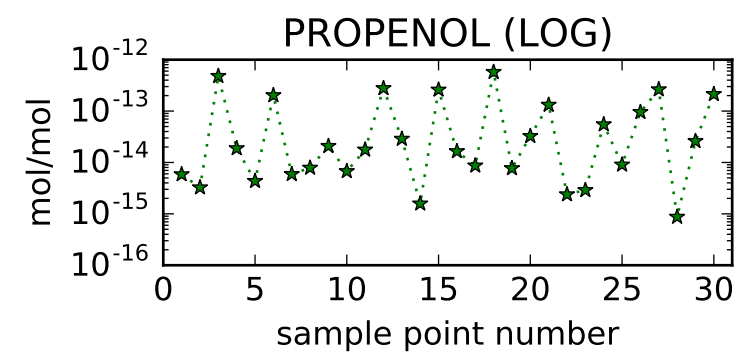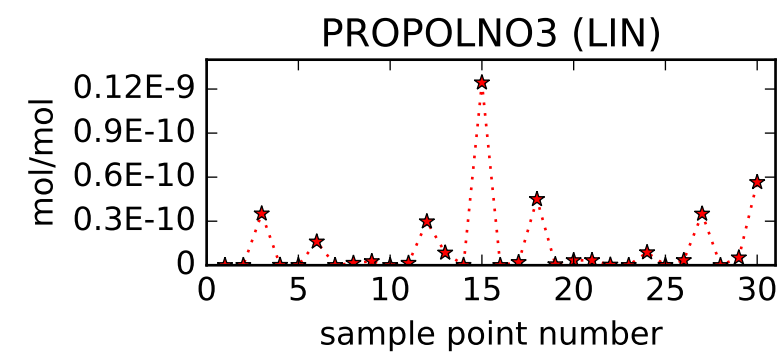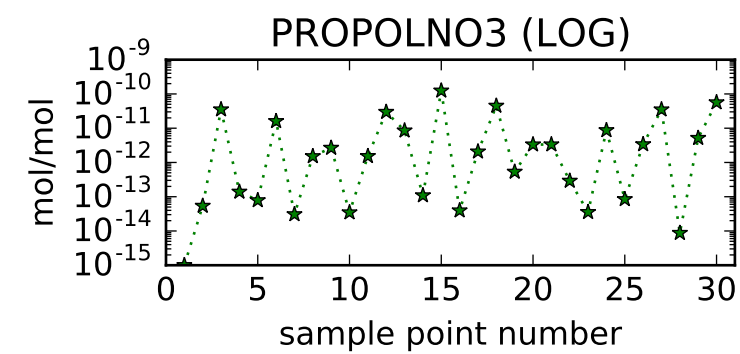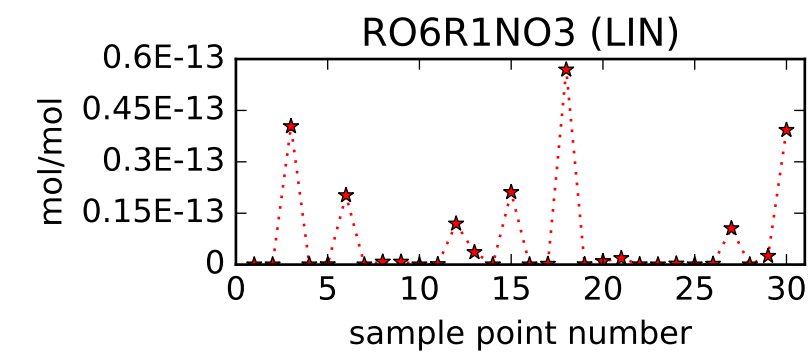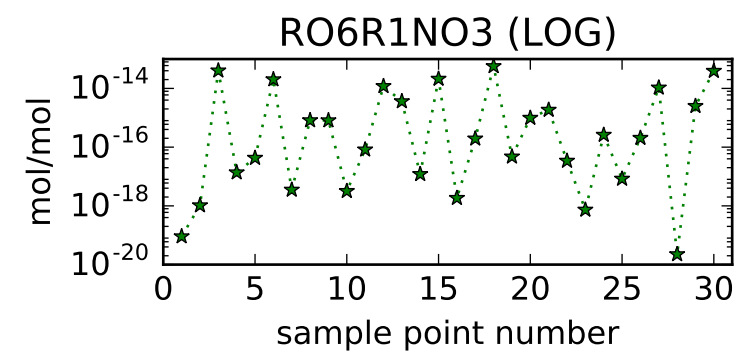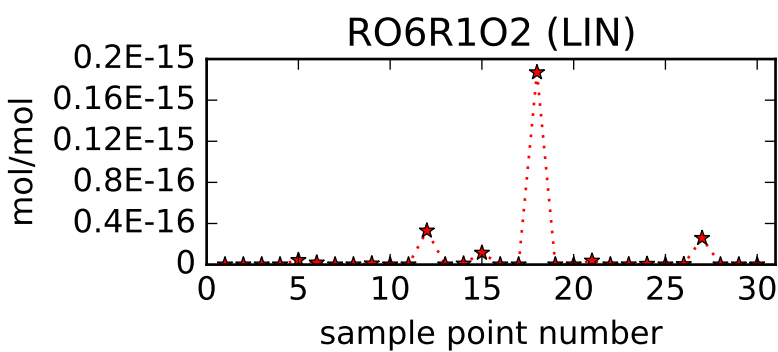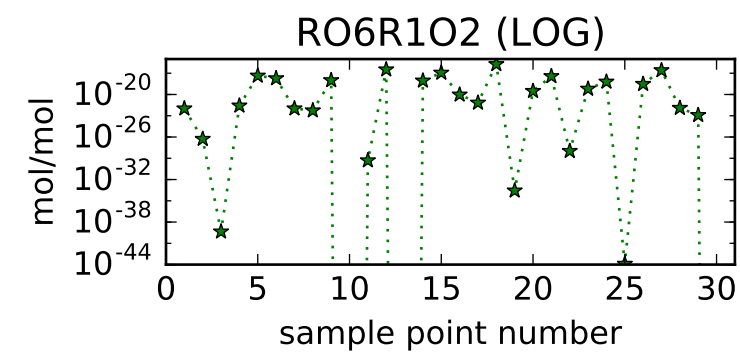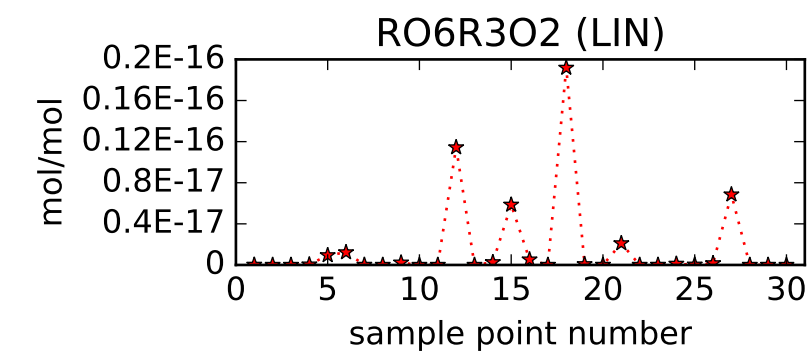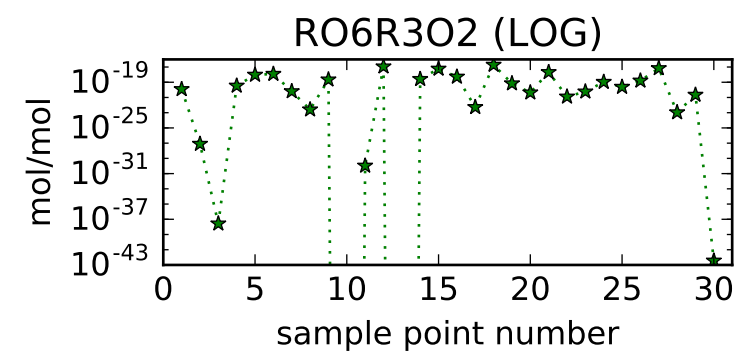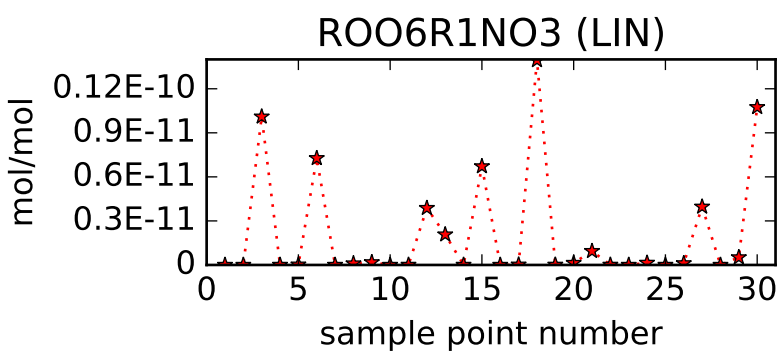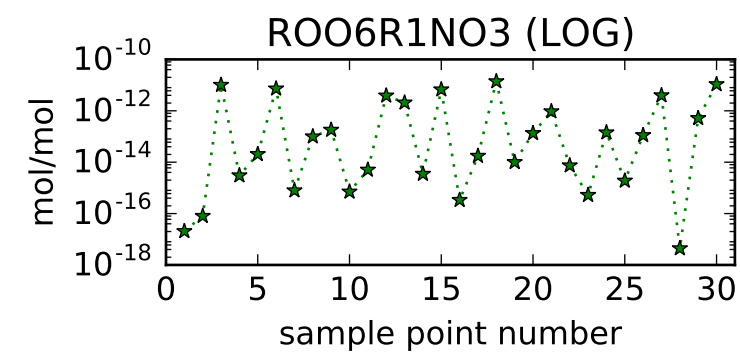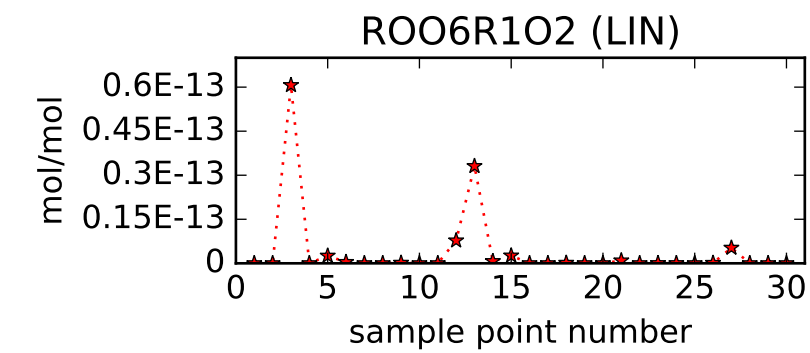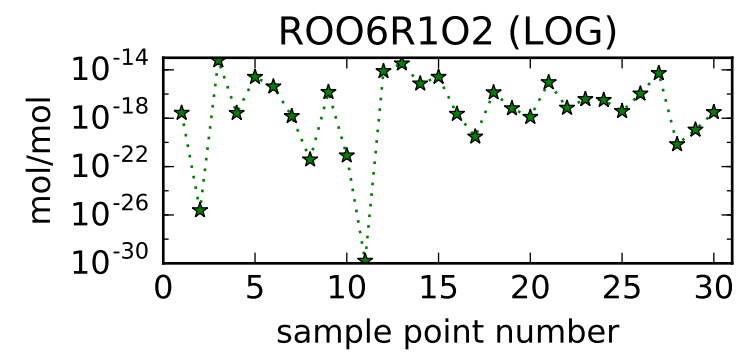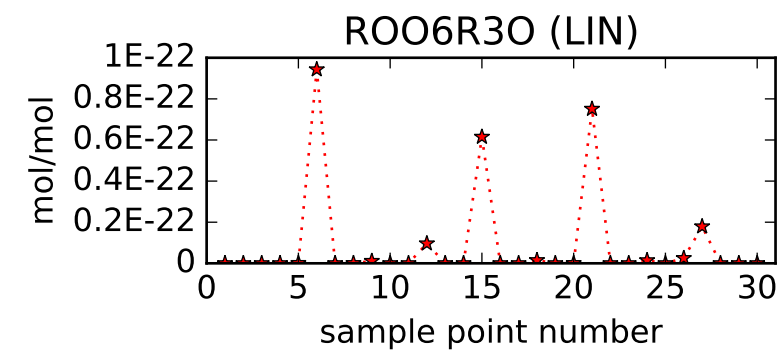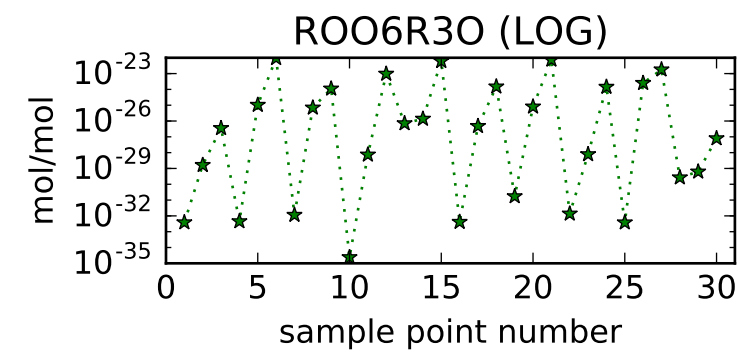

ROO6R3O2 (LIN)

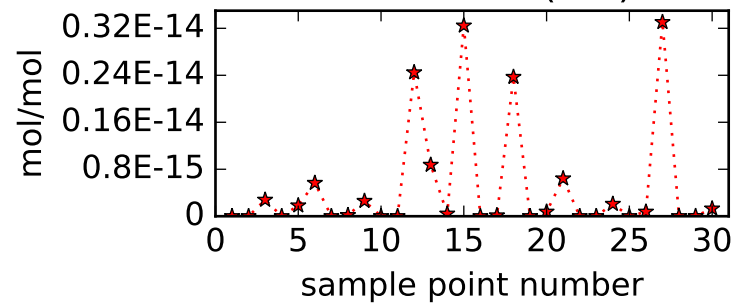

ROO6R3O2 (LOG)

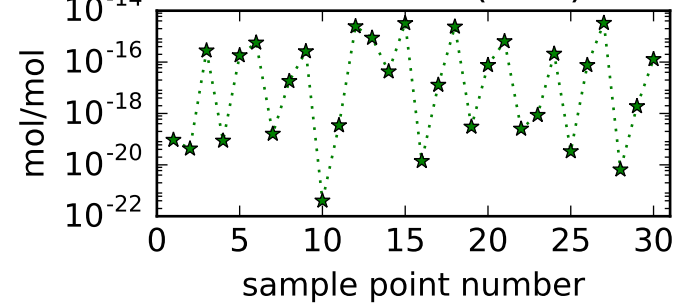

ROO6R5O2 (LIN)

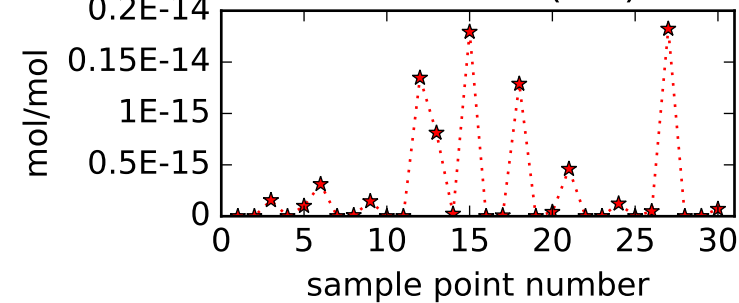

ROO6R5O2 (LOG)

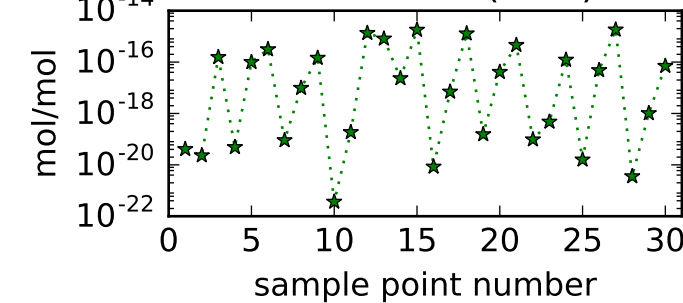

S (LIN)

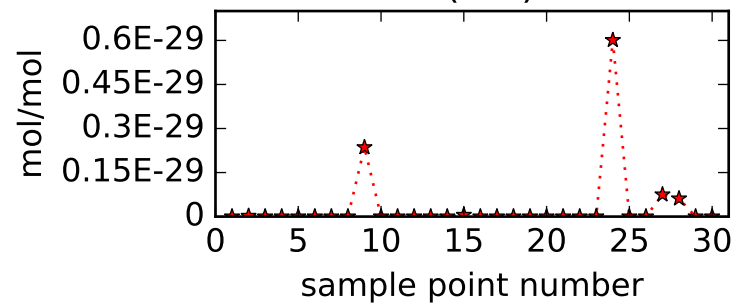

S (LOG)

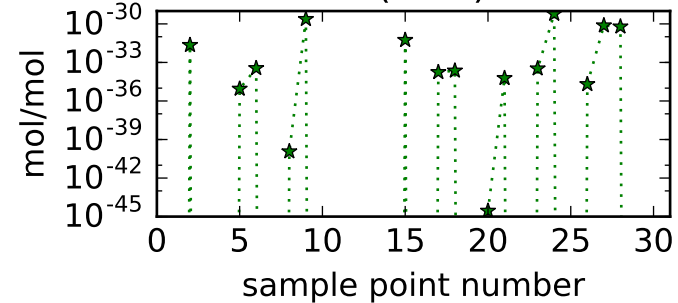

SABINENE (LIN)

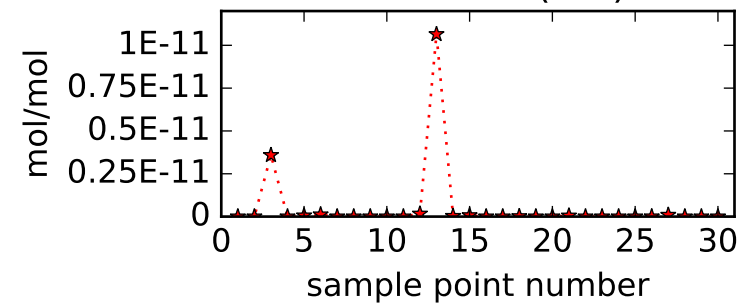

SABINENE (LOG)

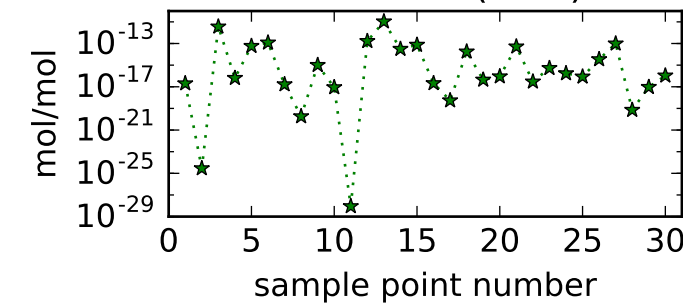

SF6 (LIN)

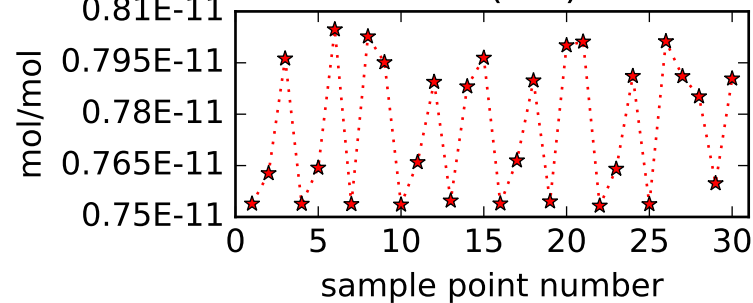

SF6 (LOG)

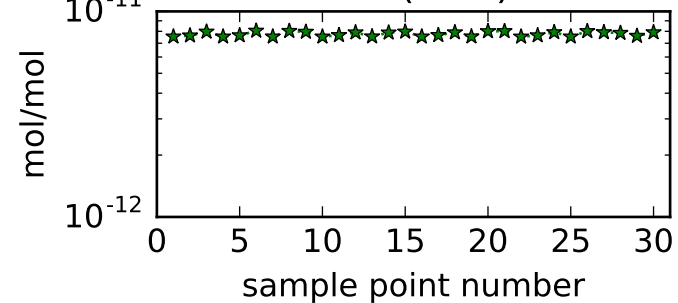

SF6\_AOA (LIN)

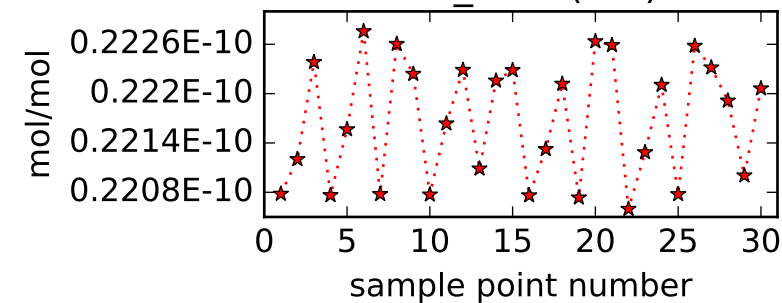

SF6\_AOA (LOG)

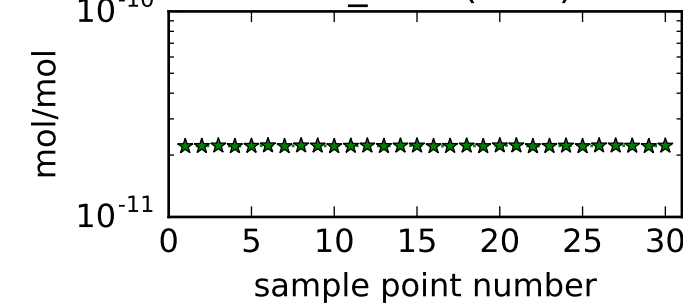

SF6\_AOAc (LIN)

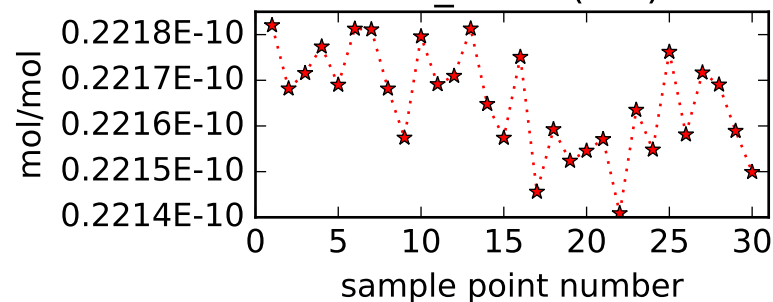

SF6\_AOAc (LOG)

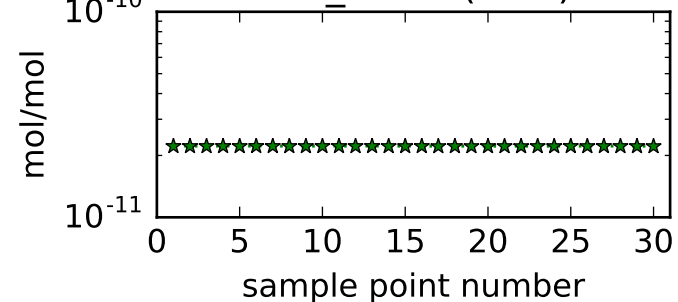

SF6\_CCMI (LIN)

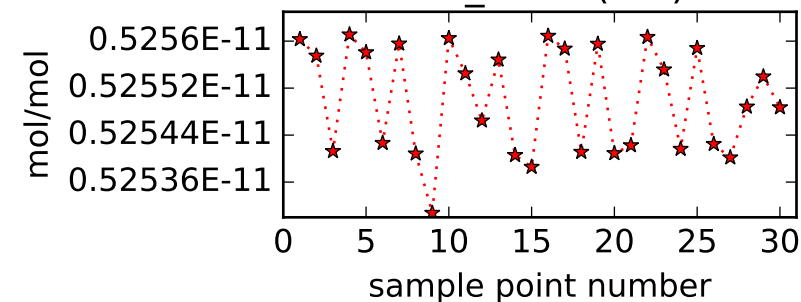

SF6\_CCMI (LOG)

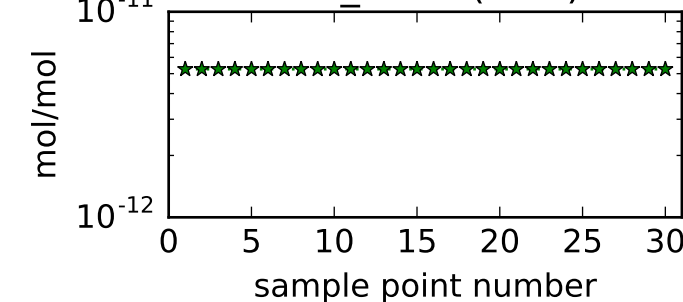

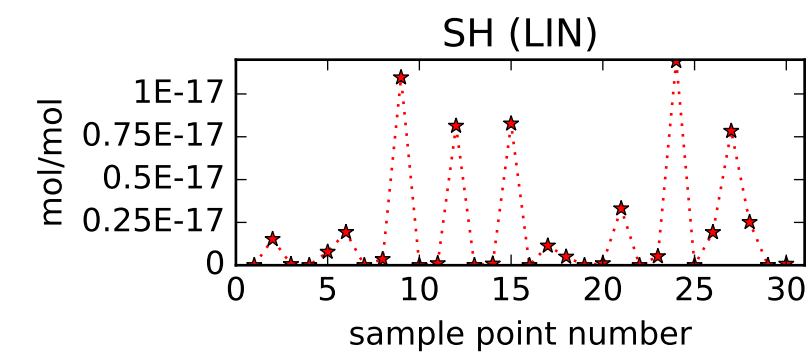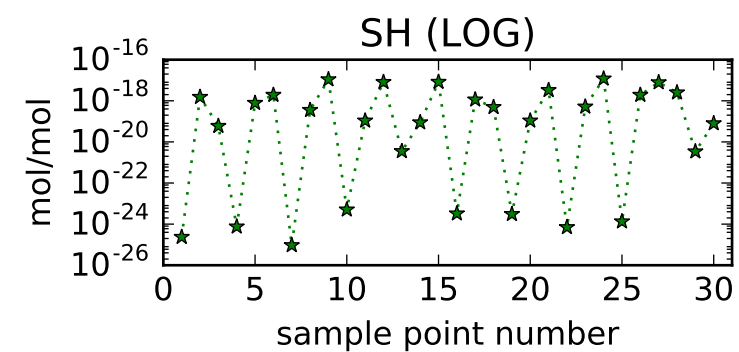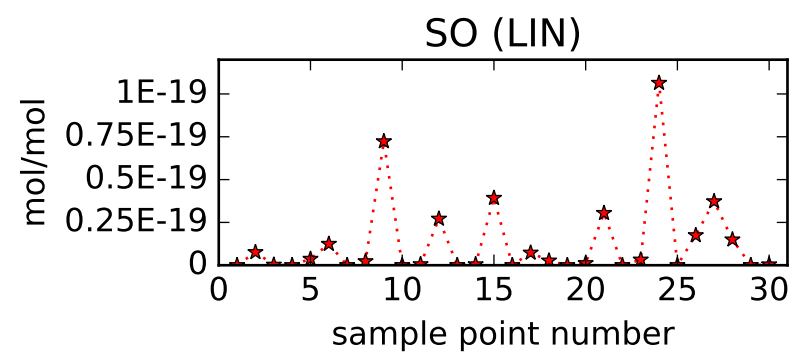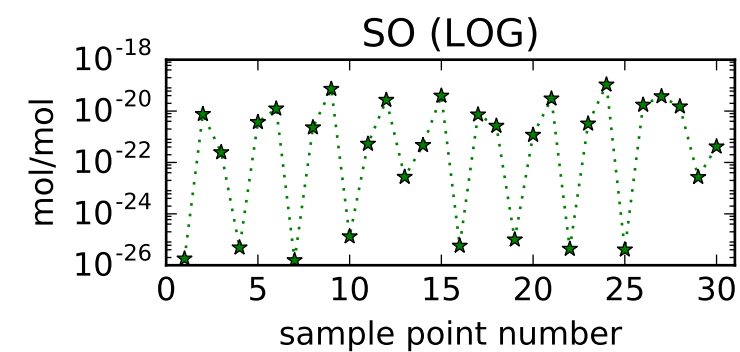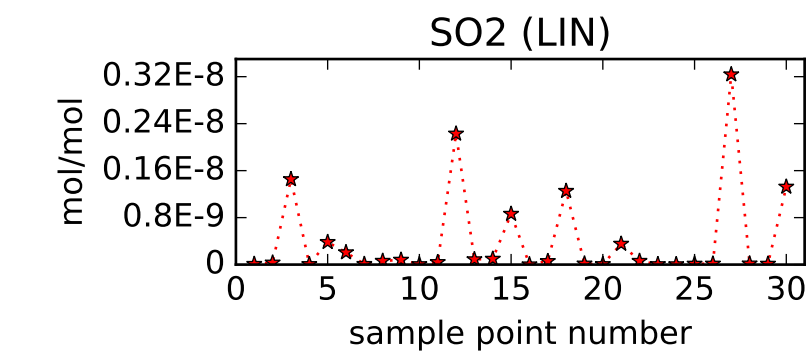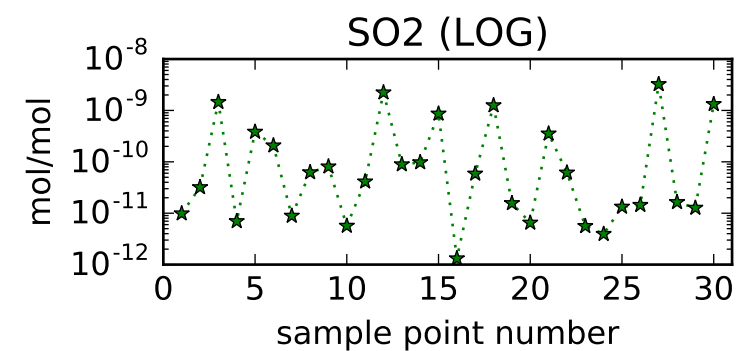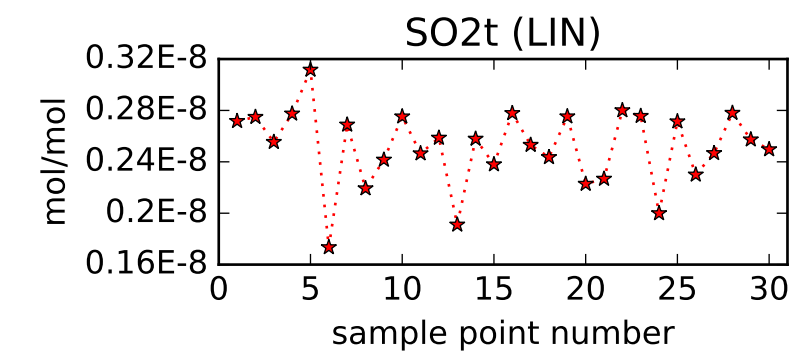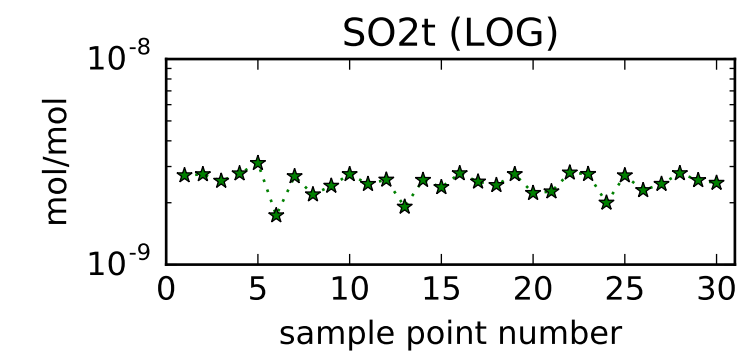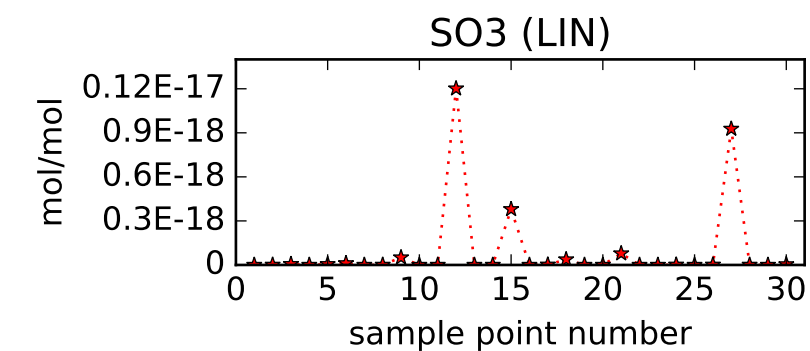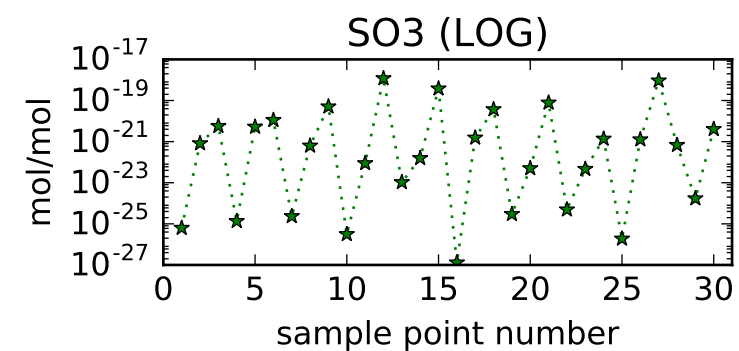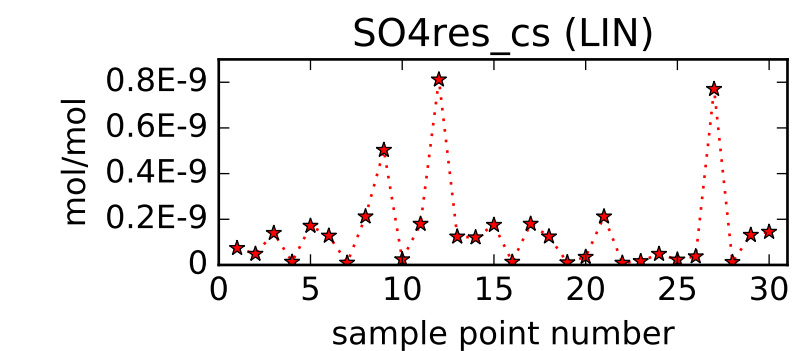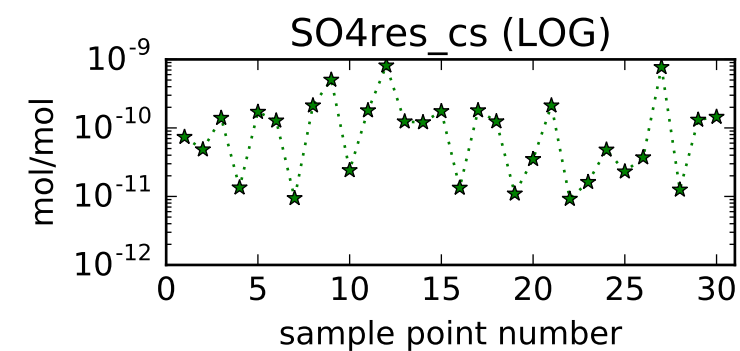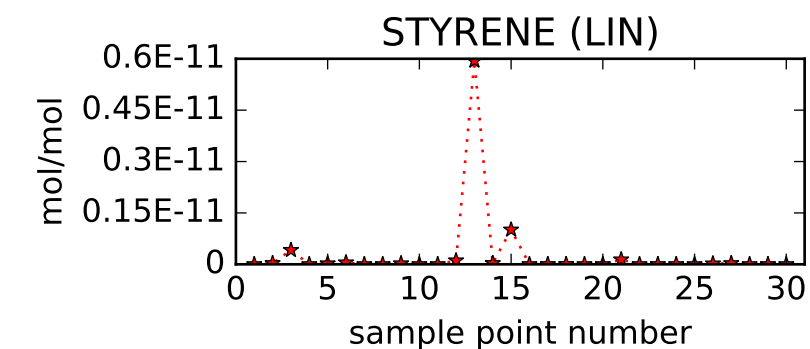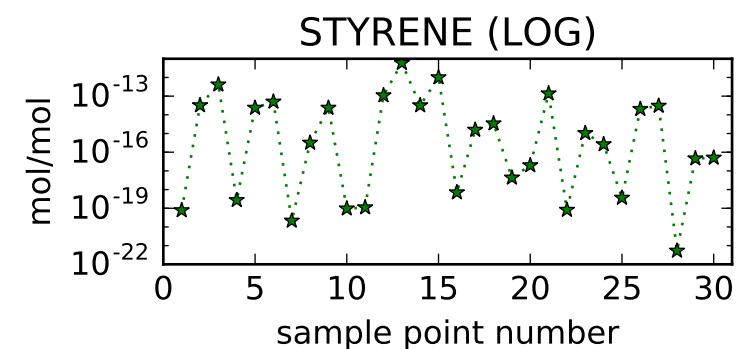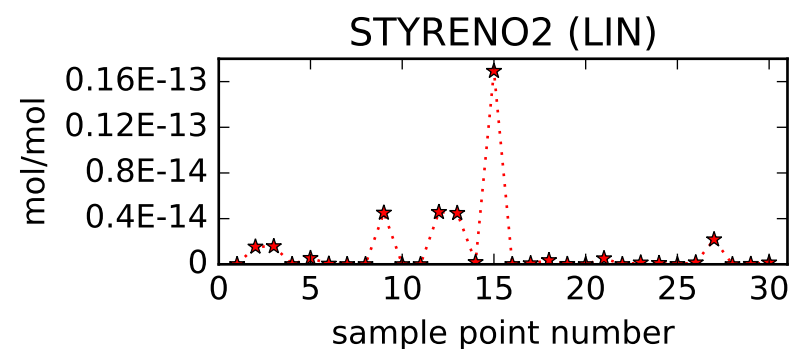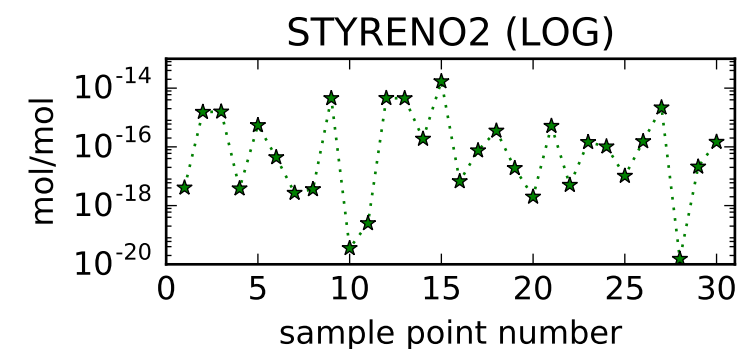

STYRENOOH (LIN)

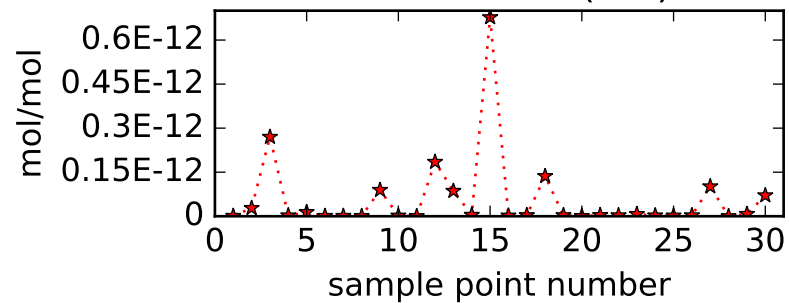

STYRENOOH (LOG)

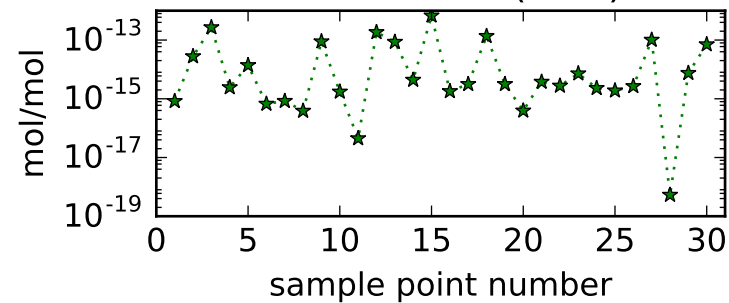

TBUT2ENE (LIN)

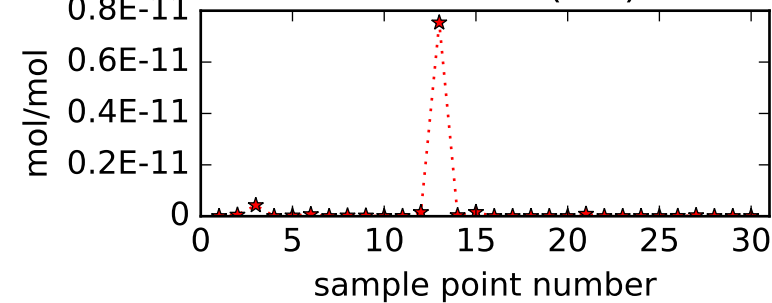

TBUT2ENE (LOG)

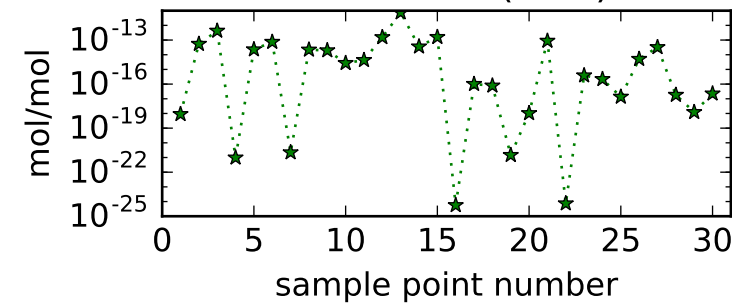

TC4H9NO3 (LIN)

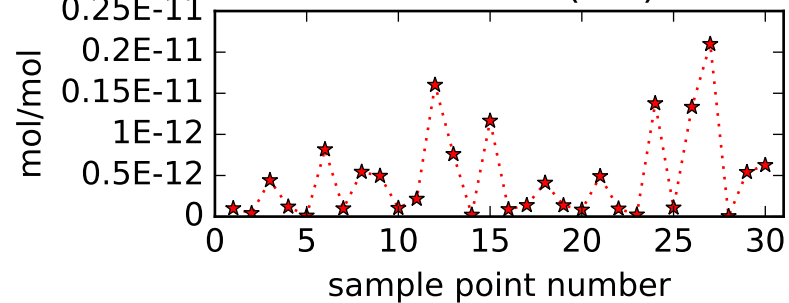

TC4H9NO3 (LOG)

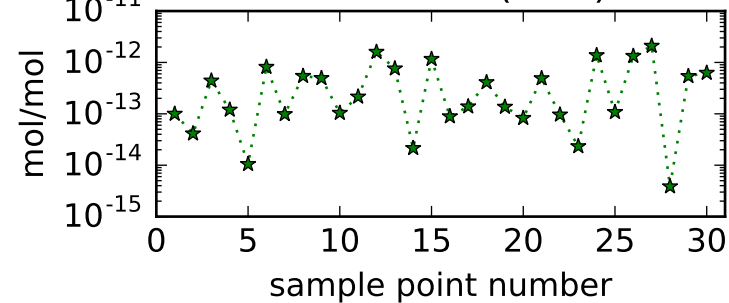

TC4H9O2 (LIN)

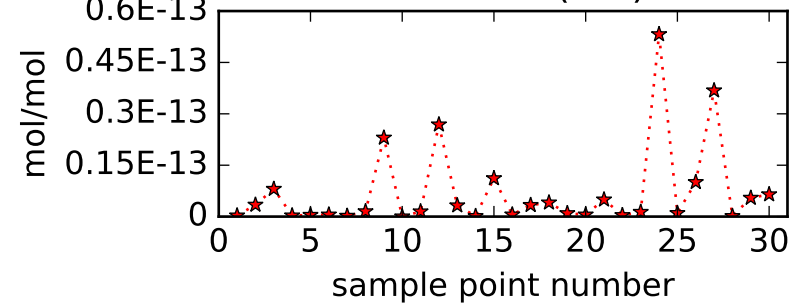

TC4H9O2 (LOG)

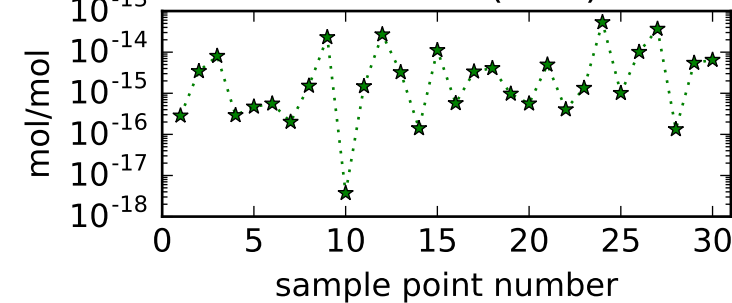

TC4H9OOH (LIN)

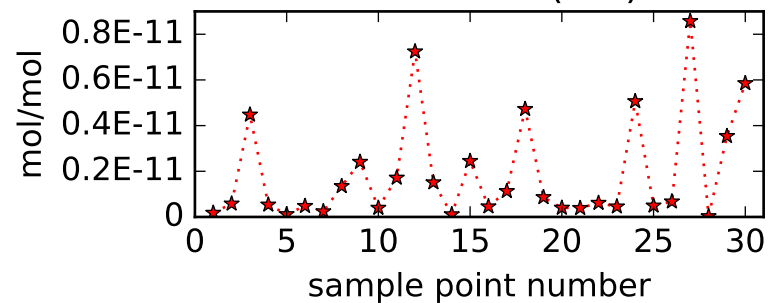

TC4H9OOH (LOG)

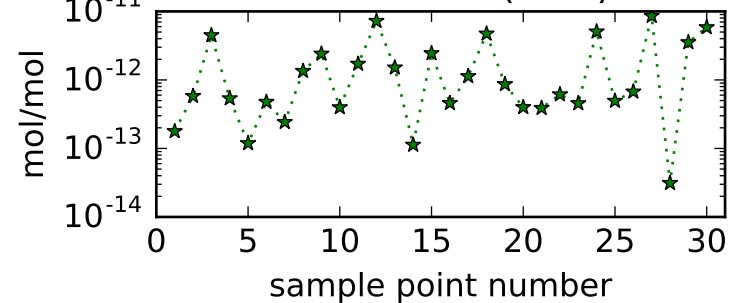

TLBIPERNO3 (LIN)

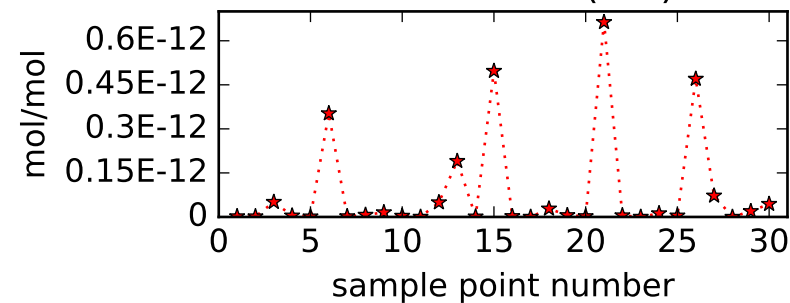

TLBIPERNO3 (LOG)

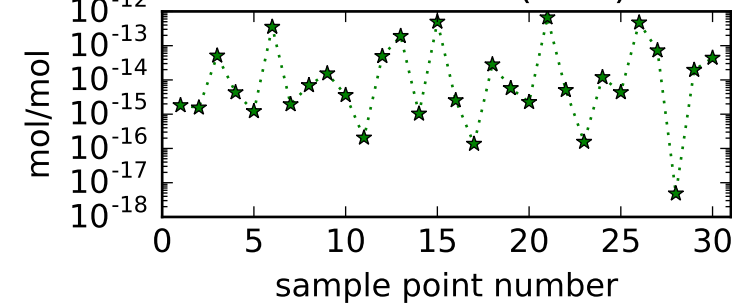

TLBIPERO2 (LIN)

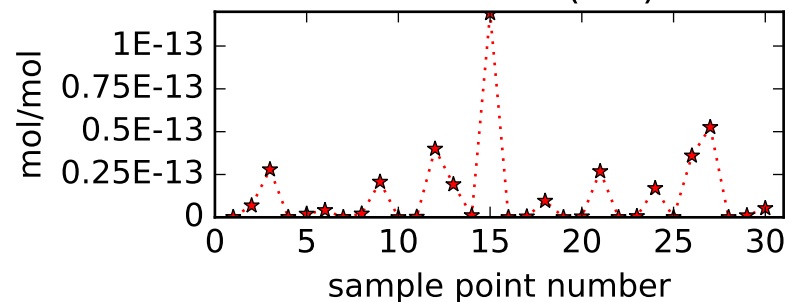

TLBIPERO2 (LOG)

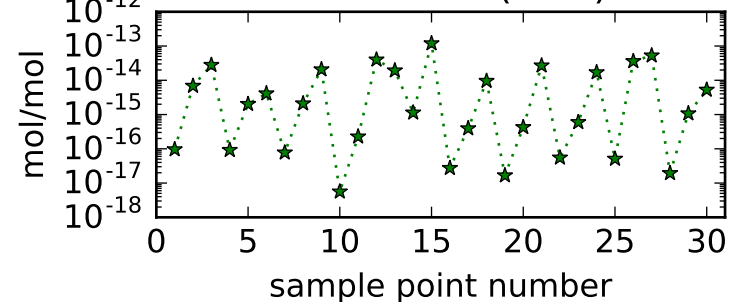

TLBIPEROOH (LIN)

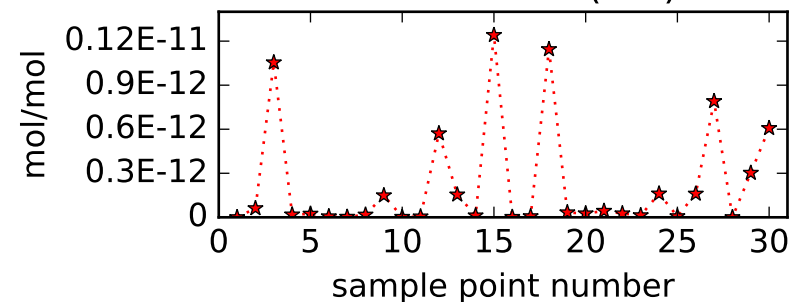

TLBIPEROOH (LOG)

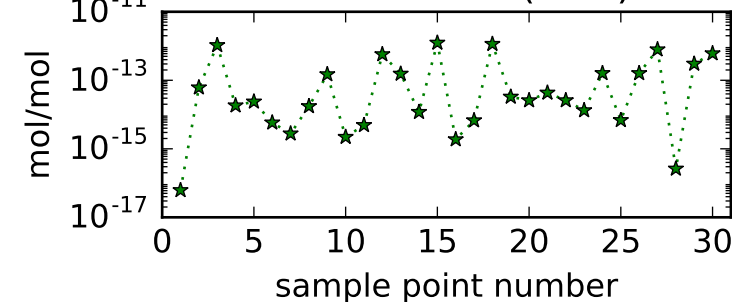

TLEMUCCO (LIN)

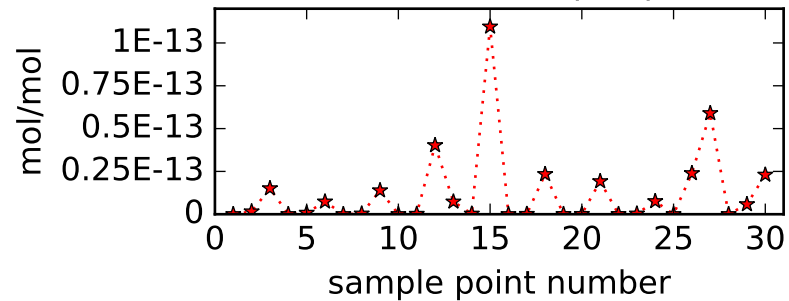

TLEMUCCO (LOG)

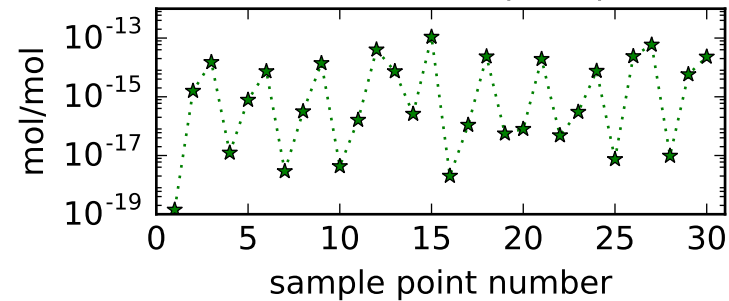

TLEMUCCO2H (LIN)

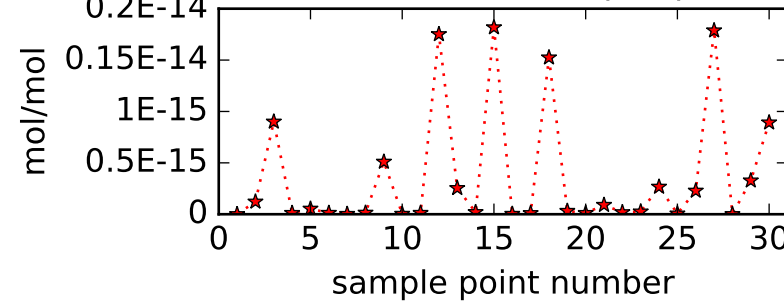

TLEMUCCO2H (LOG)

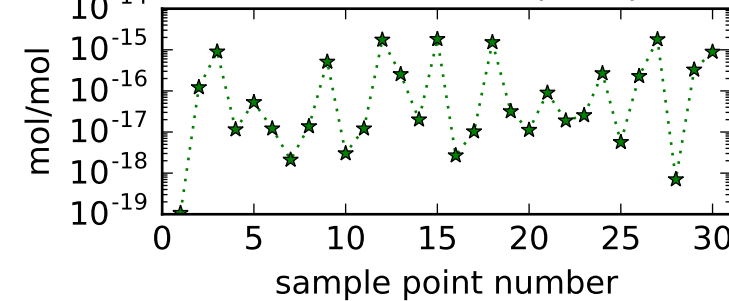

TLEMUCCO3 (LIN)

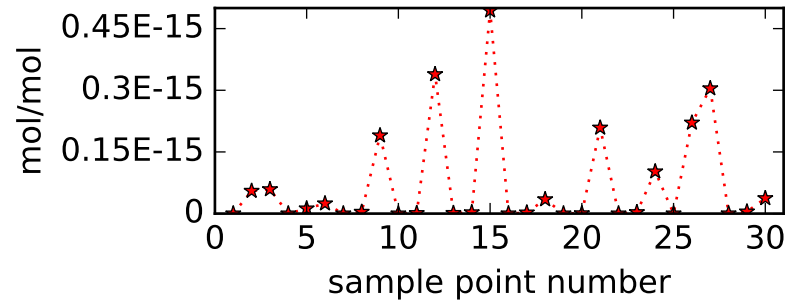

TLEMUCCO3 (LOG)

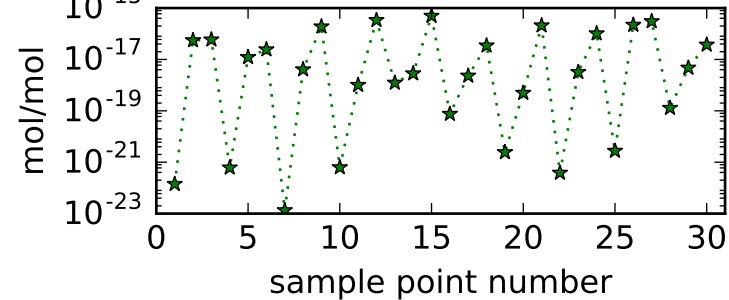

TLEMUCCO3H (LIN)

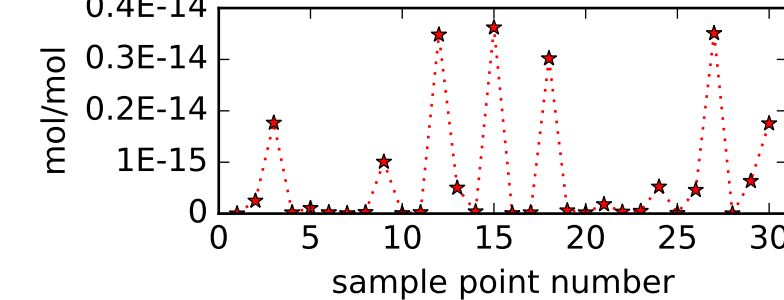

TLEMUCCO3H (LOG)

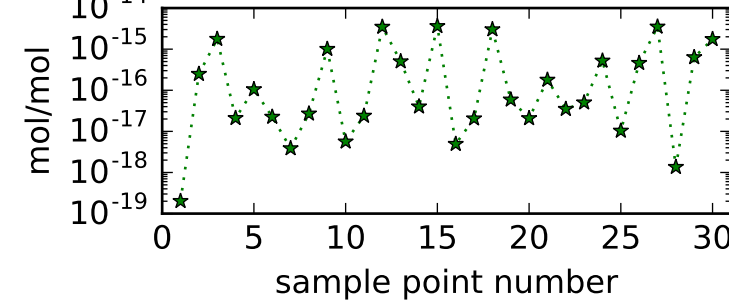

TLEMUCNO3 (LIN)

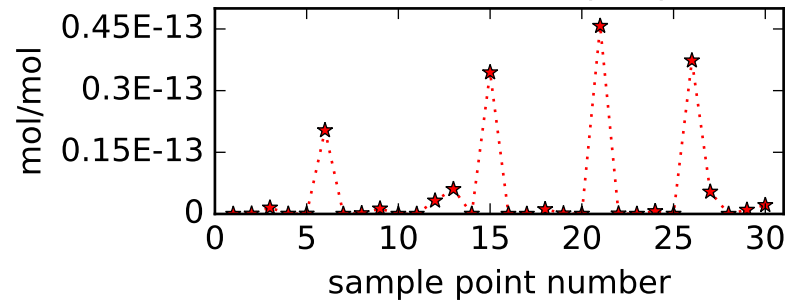

TLEMUCNO3 (LOG)

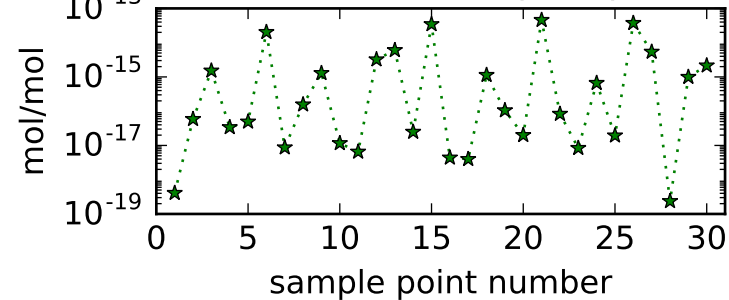

TLEMUCO2 (LIN)

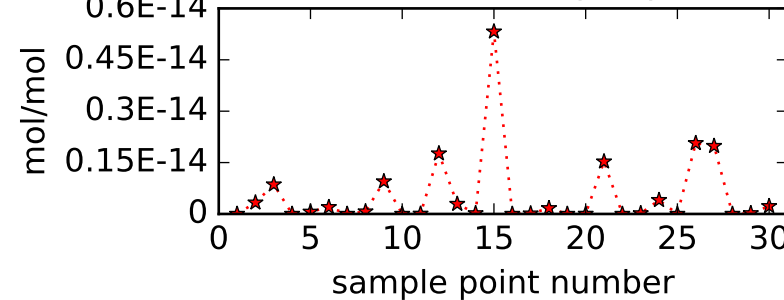

TLEMUCO2 (LOG)

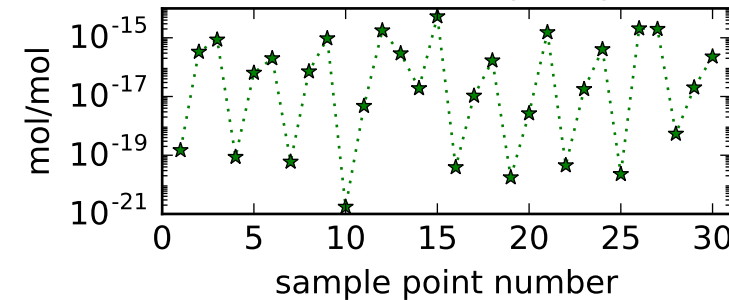

TLEMUCOOH (LIN)

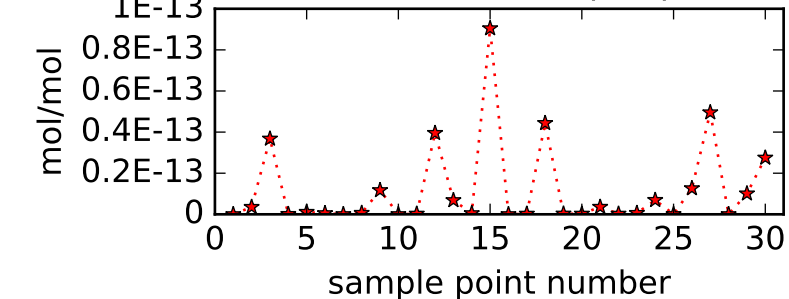

TLEMUCOOH (LOG)

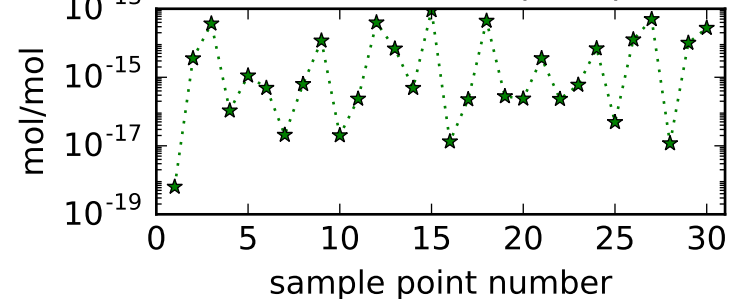

TLEMUCPAN (LIN)

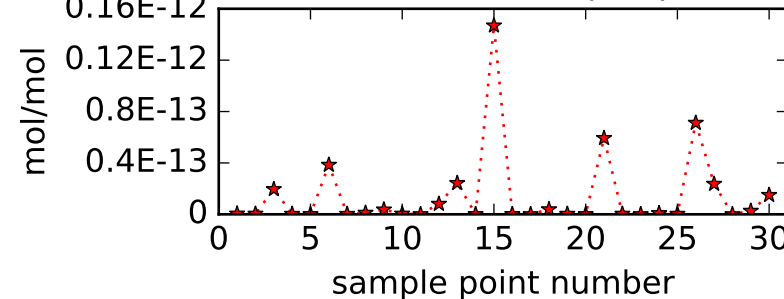

TLEMUCPAN (LOG)

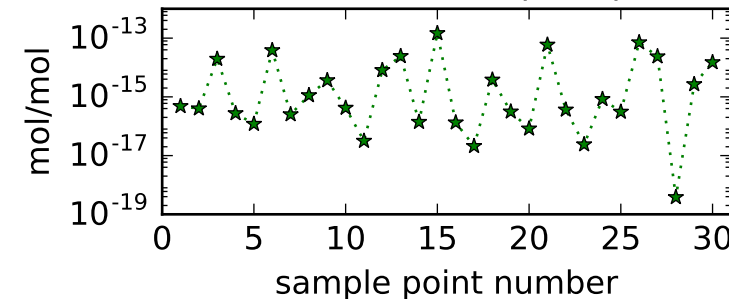



TLEPOXMUC (LIN)

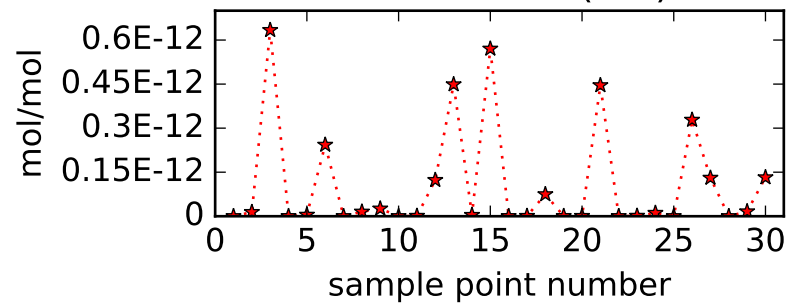

TLEPOXMUC (LOG)

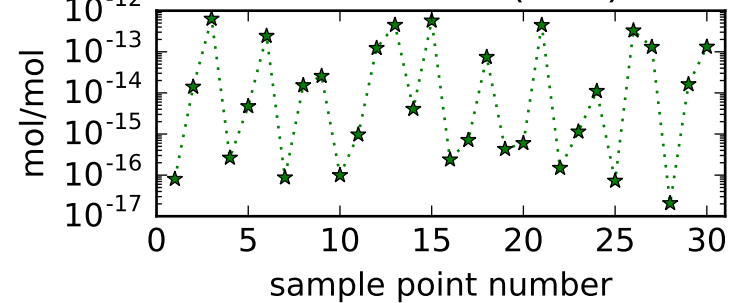

TLFUO2 (LIN)

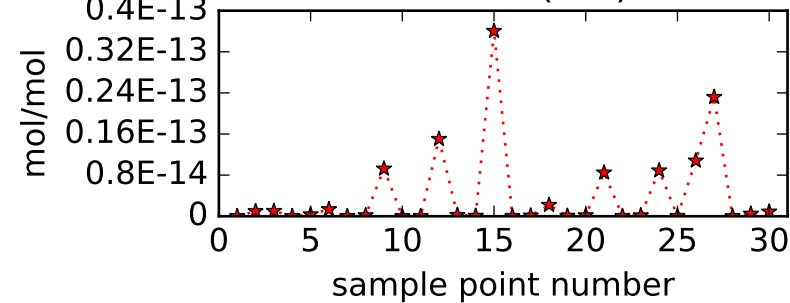

TLFUO2 (LOG)

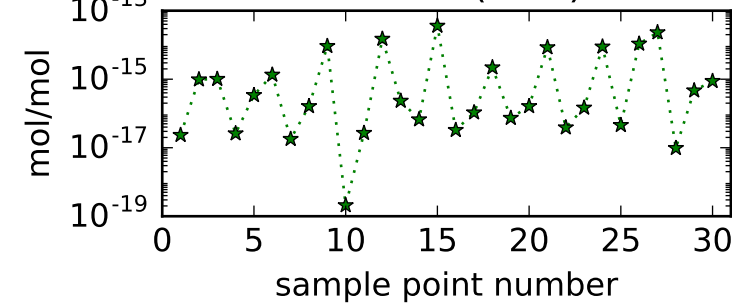

TLFUONE (LIN)

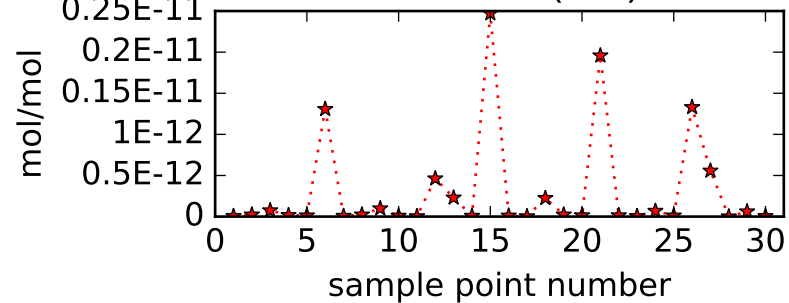

TLFUONE (LOG)

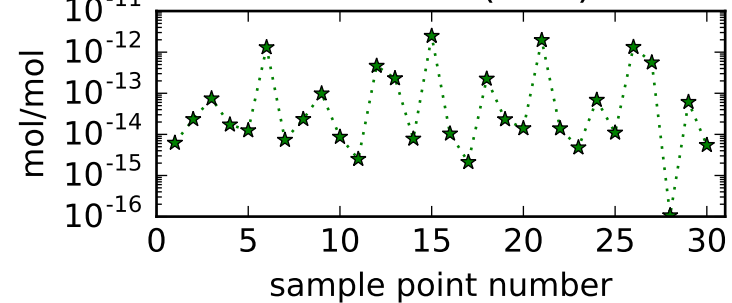

TLFUOOH (LIN)

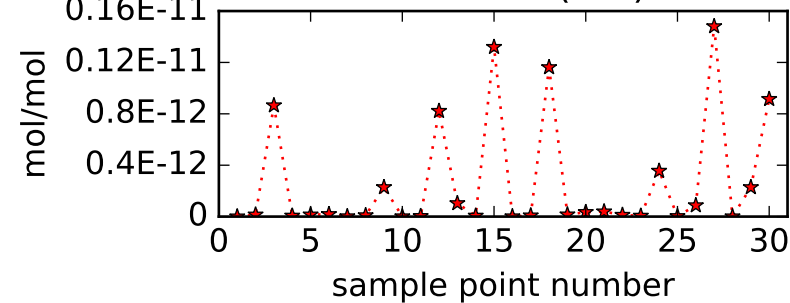

TLFUOOH (LOG)

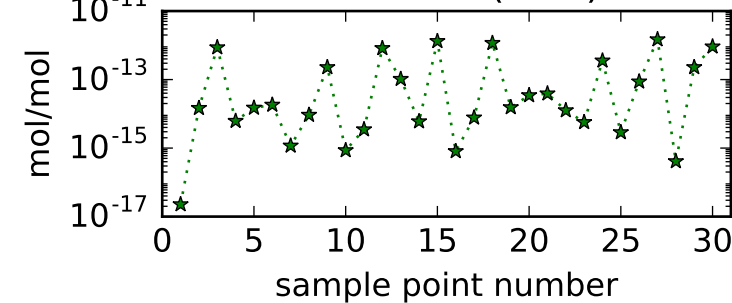

TLOBIPEROH (LIN)

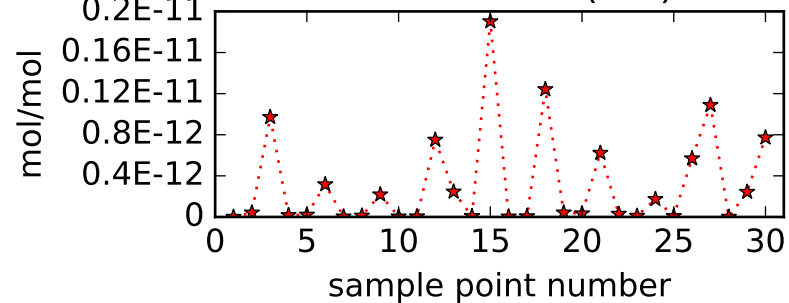

TLOBIPEROH (LOG)

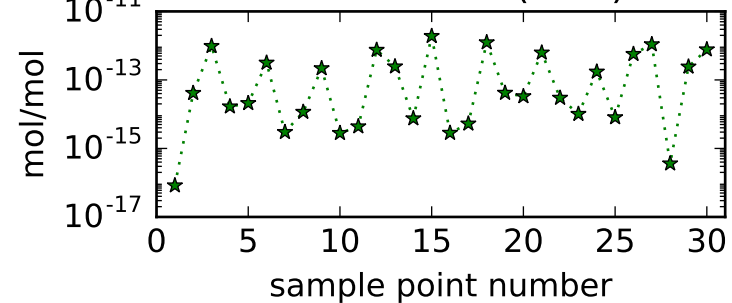

TOL1O (LIN)

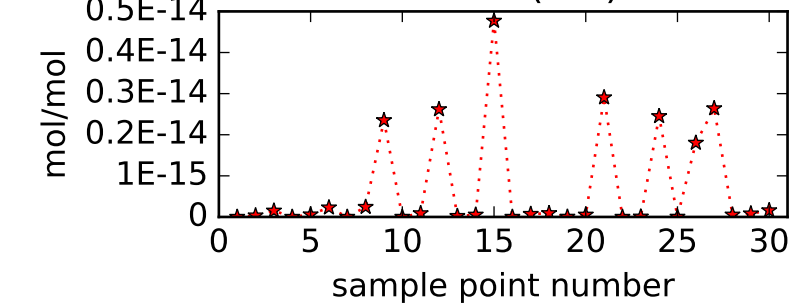

TOL1O (LOG)

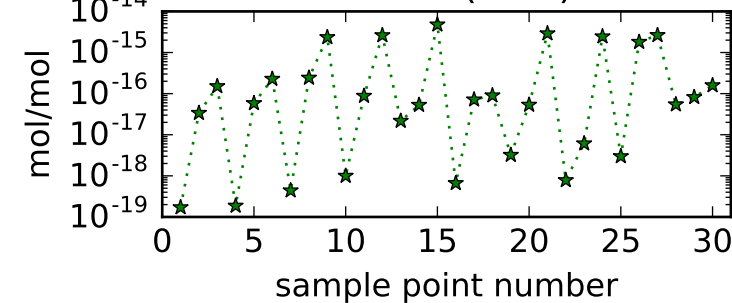

TOL1OHNO2 (LIN)

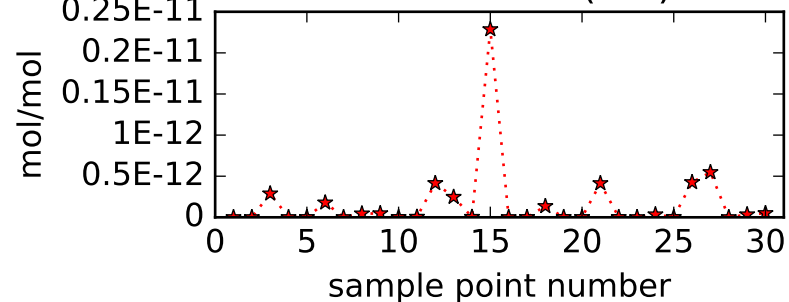

TOL1OHNO2 (LOG)

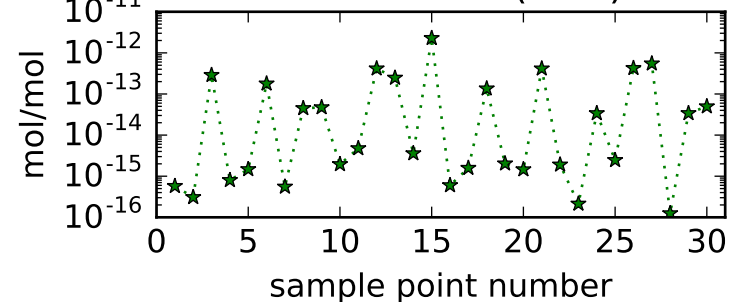

TOLUENE (LIN)

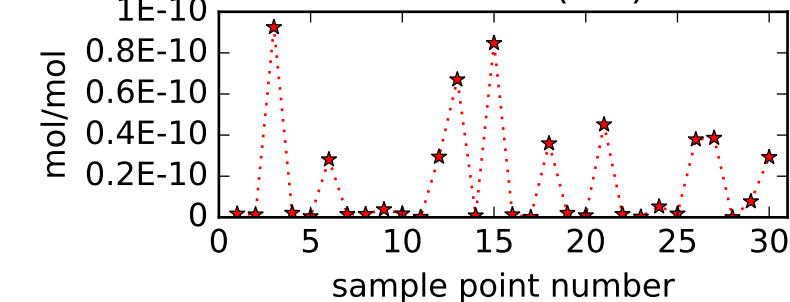

TOLUENE (LOG)

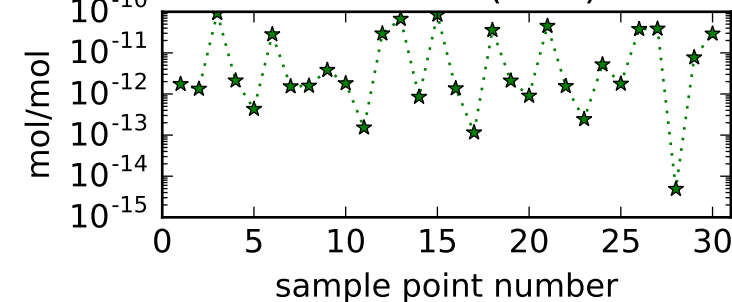

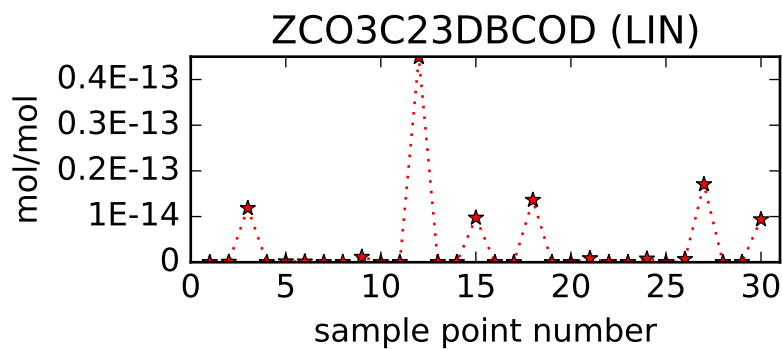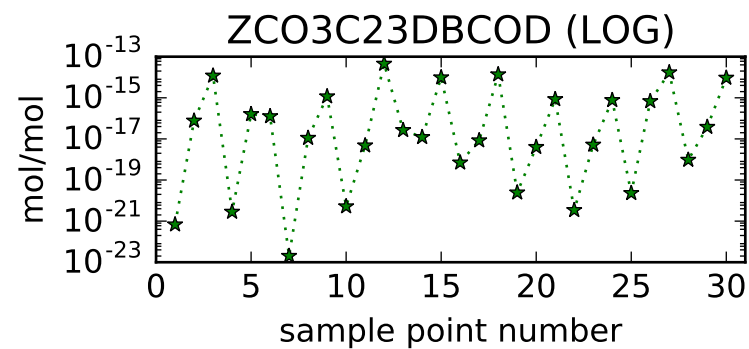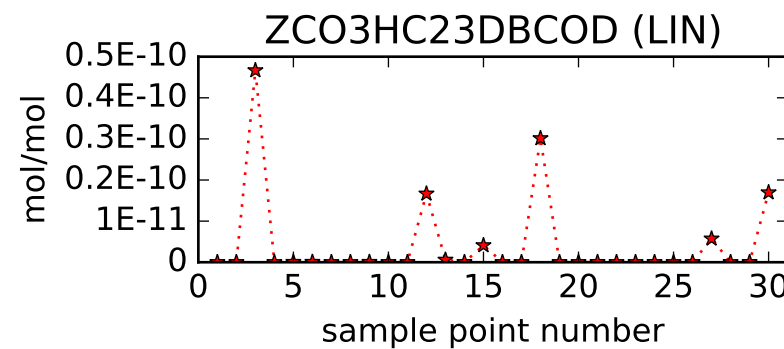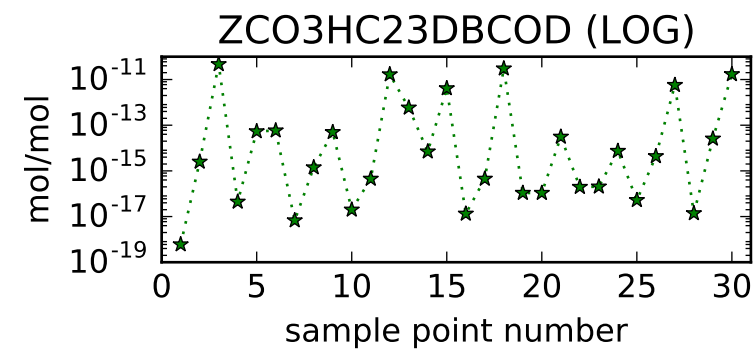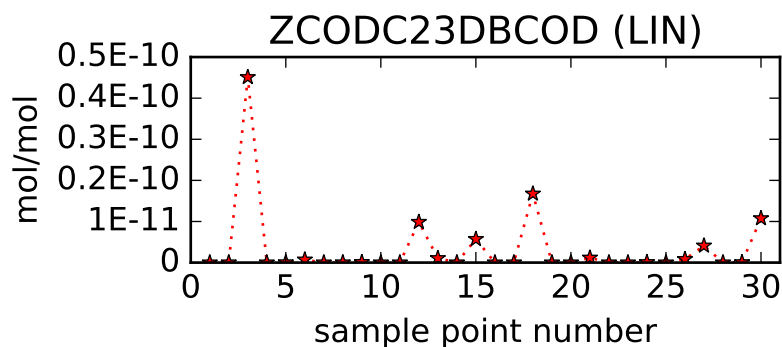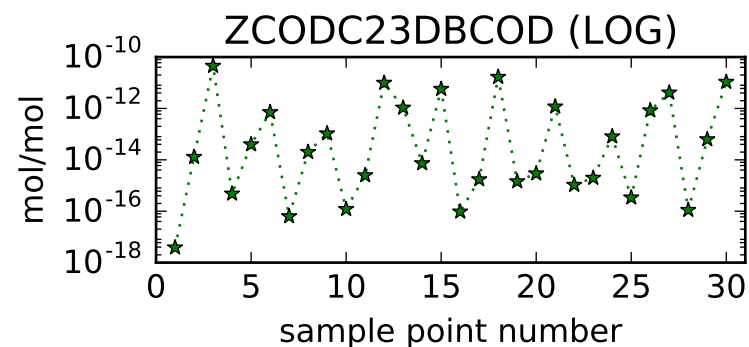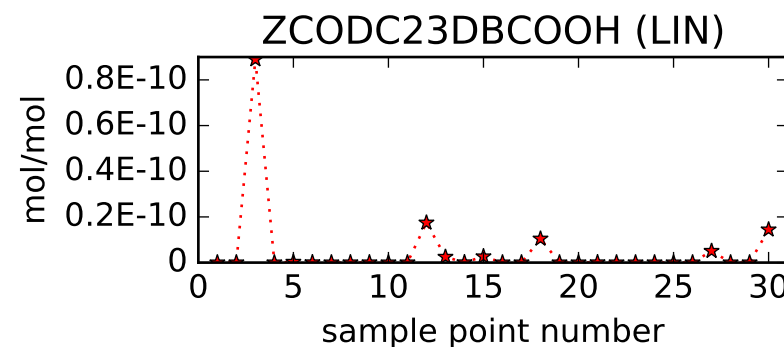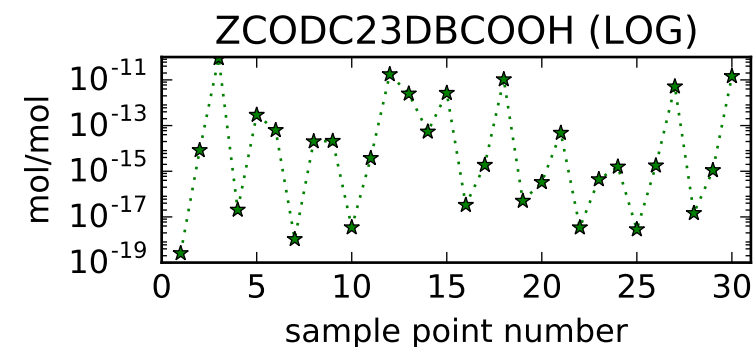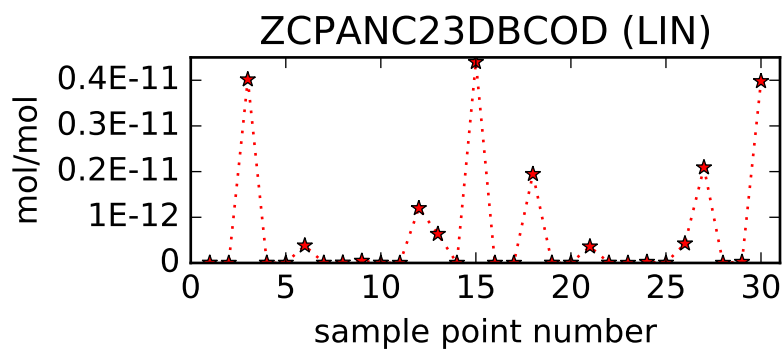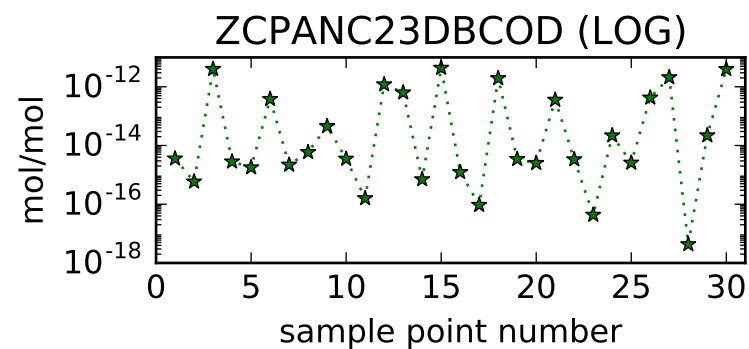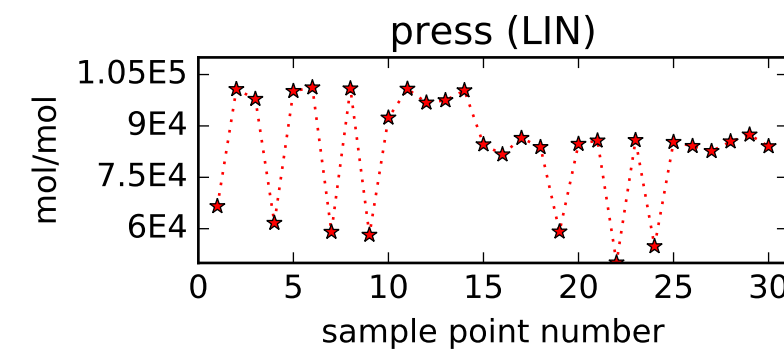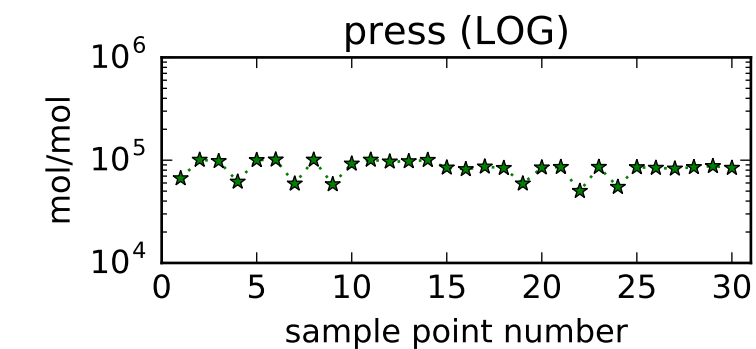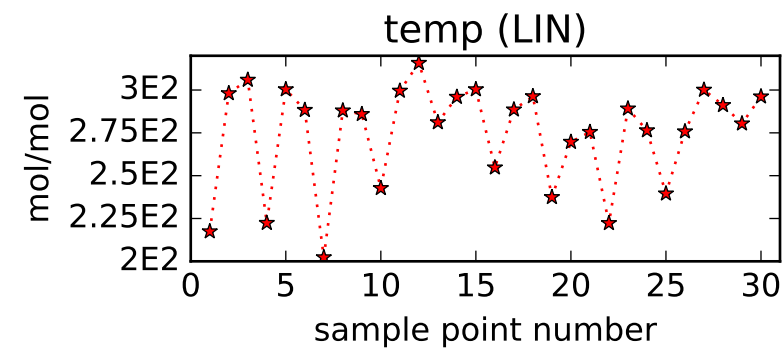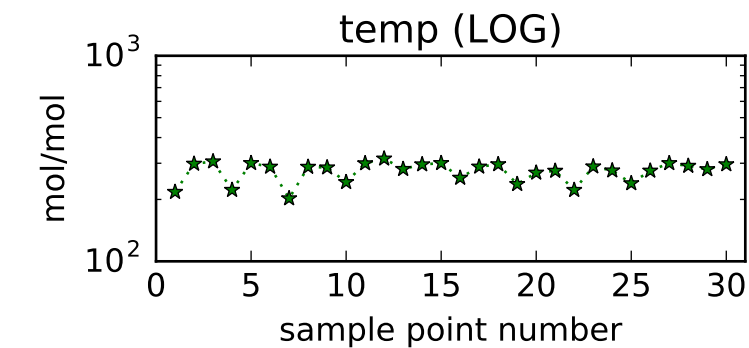

Supplement: Supplementary file 20 [file gmd-2018-201-supplement.zip]
