# Supplementary material for: The atmospheric chemistry box model CAABA/MECCA-4.0gmdd
Source: Copernicus journal article supplement (doi:10.5194/gmd-2018-201), 2018-09-03
Supplement: Supplementary file 12 [file gmd-2018-201-supplement.zip]

CAABA/MECCA

Generated by Doxygen 1.7.6.1

Tue Jun 23 2015 14:11:58



# Contents

|          |                                                                 |           |
|----------|-----------------------------------------------------------------|-----------|
| <b>1</b> | <b>Introduction</b>                                             | <b>1</b>  |
| <b>2</b> | <b>Todo List</b>                                                | <b>3</b>  |
| <b>3</b> | <b>Data Type Index</b>                                          | <b>5</b>  |
| 3.1      | Data Types List . . . . .                                       | 5         |
| <b>4</b> | <b>File Index</b>                                               | <b>9</b>  |
| 4.1      | File List . . . . .                                             | 9         |
| <b>5</b> | <b>Data Type Documentation</b>                                  | <b>13</b> |
| 5.1      | messy_main_rnd_mtw_ja::add Interface Reference . . . . .        | 13        |
| 5.1.1    | Member Function/Subroutine Documentation . . . . .              | 13        |
| 5.1.1.1  | gf2x_add . . . . .                                              | 13        |
| 5.2      | messy_main_rnd_mtw_ja::add_assign Interface Reference . . . . . | 13        |
| 5.2.1    | Member Function/Subroutine Documentation . . . . .              | 13        |
| 5.2.1.1  | gf2x_add_assign . . . . .                                       | 13        |
| 5.3      | messy_main_rnd_mtw_ja::assign Interface Reference . . . . .     | 14        |
| 5.3.1    | Member Function/Subroutine Documentation . . . . .              | 14        |
| 5.3.1.1  | gf2x_assign . . . . .                                           | 14        |
| 5.4      | caaba_io Module Reference . . . . .                             | 14        |
| 5.5      | caaba_mem Module Reference . . . . .                            | 14        |
| 5.5.1    | Member Data Documentation . . . . .                             | 16        |
| 5.5.1.1  | c . . . . .                                                     | 16        |
| 5.5.1.2  | Ca_precip . . . . .                                             | 16        |
| 5.5.1.3  | caaba_version . . . . .                                         | 16        |
| 5.5.1.4  | cair . . . . .                                                  | 16        |

|          |                     |    |
|----------|---------------------|----|
| 5.5.1.5  | cossza              | 16 |
| 5.5.1.6  | degree_lat          | 16 |
| 5.5.1.7  | degree_lon          | 16 |
| 5.5.1.8  | degree_sza          | 16 |
| 5.5.1.9  | drydep_scenario     | 16 |
| 5.5.1.10 | emission_scenario   | 16 |
| 5.5.1.11 | firstjan_jul        | 16 |
| 5.5.1.12 | init_j              | 17 |
| 5.5.1.13 | init_j_index        | 17 |
| 5.5.1.14 | init_scenario       | 17 |
| 5.5.1.15 | init_spec           | 17 |
| 5.5.1.16 | input_jval          | 17 |
| 5.5.1.17 | input_physc         | 17 |
| 5.5.1.18 | jval_clev           | 17 |
| 5.5.1.19 | l_ff                | 17 |
| 5.5.1.20 | l_ignore_relhum     | 17 |
| 5.5.1.21 | l_injectNOx         | 17 |
| 5.5.1.22 | l_input_jval        | 17 |
| 5.5.1.23 | l_psat_emac         | 17 |
| 5.5.1.24 | l_relhum_wmo        | 17 |
| 5.5.1.25 | l_RRconc            | 17 |
| 5.5.1.26 | l_runtime_str       | 17 |
| 5.5.1.27 | l_skipkpp           | 17 |
| 5.5.1.28 | l_spechum           | 17 |
| 5.5.1.29 | l_steady_state_stop | 17 |
| 5.5.1.30 | lday                | 17 |
| 5.5.1.31 | lhour               | 17 |
| 5.5.1.32 | lmin                | 17 |
| 5.5.1.33 | lmonth              | 17 |
| 5.5.1.34 | localtime           | 17 |
| 5.5.1.35 | lsec                | 17 |
| 5.5.1.36 | lyear               | 18 |
| 5.5.1.37 | model_end           | 18 |
| 5.5.1.38 | model_start         | 18 |

|          |                 |    |
|----------|-----------------|----|
| 5.5.1.39 | model_start_day | 18 |
| 5.5.1.40 | model_time      | 18 |
| 5.5.1.41 | percent_done    | 18 |
| 5.5.1.42 | photo_scenario  | 18 |
| 5.5.1.43 | photrat_channel | 18 |
| 5.5.1.44 | press           | 18 |
| 5.5.1.45 | relhum          | 18 |
| 5.5.1.46 | runlast         | 18 |
| 5.5.1.47 | runtime         | 18 |
| 5.5.1.48 | runtime_str     | 18 |
| 5.5.1.49 | spechum         | 18 |
| 5.5.1.50 | t0day           | 18 |
| 5.5.1.51 | t0hour          | 18 |
| 5.5.1.52 | t0min           | 18 |
| 5.5.1.53 | t0month         | 18 |
| 5.5.1.54 | t0sec           | 18 |
| 5.5.1.55 | t0year          | 18 |
| 5.5.1.56 | t_NOxoff        | 18 |
| 5.5.1.57 | t_NOxon         | 18 |
| 5.5.1.58 | temp            | 18 |
| 5.5.1.59 | time0_jul       | 18 |
| 5.5.1.60 | time_string     | 19 |
| 5.5.1.61 | timesteplen     | 19 |
| 5.5.1.62 | timesteplen_str | 19 |
| 5.5.1.63 | tuf             | 19 |
| 5.5.1.64 | USE_E4CHEM      | 19 |
| 5.5.1.65 | USE_JVAL        | 19 |
| 5.5.1.66 | USE_MECCA       | 19 |
| 5.5.1.67 | USE_RADJIMT     | 19 |
| 5.5.1.68 | USE_READJ       | 19 |
| 5.5.1.69 | USE_SAPPHO      | 19 |
| 5.5.1.70 | USE_SEMIDEP     | 19 |
| 5.5.1.71 | USE_TRAJECT     | 19 |
| 5.5.1.72 | vlat            | 19 |

|          |                                                     |    |
|----------|-----------------------------------------------------|----|
| 5.5.1.73 | vlon                                                | 19 |
| 5.5.1.74 | vpress                                              | 19 |
| 5.5.1.75 | vrelhum                                             | 19 |
| 5.5.1.76 | vspechum                                            | 19 |
| 5.5.1.77 | vtemp                                               | 19 |
| 5.5.1.78 | vtime                                               | 19 |
| 5.5.1.79 | x_j_no2                                             | 19 |
| 5.5.1.80 | zmb1                                                | 19 |
| 5.5.1.81 | zmix                                                | 19 |
| 5.6      | caaba_module Module Reference                       | 20 |
| 5.6.1    | Detailed Description                                | 20 |
| 5.6.2    | Member Function/Subroutine Documentation            | 20 |
| 5.6.2.1  | caaba_finish                                        | 20 |
| 5.6.2.2  | caaba_init                                          | 20 |
| 5.6.2.3  | caaba_physc                                         | 20 |
| 5.6.2.4  | caaba_read_nml                                      | 20 |
| 5.6.2.5  | caaba_result                                        | 21 |
| 5.6.2.6  | calc_sza                                            | 21 |
| 5.6.3    | Member Data Documentation                           | 21 |
| 5.6.3.1  | modstr                                              | 21 |
| 5.6.3.2  | ncid_messy                                          | 21 |
| 5.7      | messy_main_rnd_mtw_ja::delete Interface Reference   | 21 |
| 5.7.1    | Member Function/Subroutine Documentation            | 21 |
| 5.7.1.1  | gf2x_delete                                         | 21 |
| 5.7.1.2  | gf2x_delete_prime                                   | 21 |
| 5.8      | messy_main_rnd_mtw_ja::div Interface Reference      | 21 |
| 5.8.1    | Member Function/Subroutine Documentation            | 21 |
| 5.8.1.1  | gf2x_div                                            | 22 |
| 5.9      | messy_main_rnd_mtw_ja::div_by_x Interface Reference | 22 |
| 5.9.1    | Member Function/Subroutine Documentation            | 22 |
| 5.9.1.1  | gf2x_div_by_x                                       | 22 |
| 5.10     | messy_main_rnd_mtw_ja::divrem Interface Reference   | 22 |
| 5.10.1   | Member Function/Subroutine Documentation            | 22 |
| 5.10.1.1 | gf2x_divrem                                         | 22 |

|          |                                                                                 |    |
|----------|---------------------------------------------------------------------------------|----|
| 5.11     | <a href="#">messy_cmn_gasaq::GASQAQ_TYPE Type Reference</a>                     | 23 |
| 5.11.1   | <a href="#">Member Data Documentation</a>                                       | 23 |
| 5.11.1.1 | <a href="#">alpha_T0</a>                                                        | 23 |
| 5.11.1.2 | <a href="#">alpha_Tdep</a>                                                      | 23 |
| 5.11.1.3 | <a href="#">dryreac</a>                                                         | 23 |
| 5.11.1.4 | <a href="#">Henry_T0</a>                                                        | 23 |
| 5.11.1.5 | <a href="#">Henry_Tdep</a>                                                      | 23 |
| 5.11.1.6 | <a href="#">M</a>                                                               | 23 |
| 5.11.1.7 | <a href="#">name</a>                                                            | 23 |
| 5.11.1.8 | <a href="#">pss</a>                                                             | 23 |
| 5.12     | <a href="#">messy_main_rnd_mtw_ja::gf2x_obj Type Reference</a>                  | 23 |
| 5.12.1   | <a href="#">Member Data Documentation</a>                                       | 24 |
| 5.12.1.1 | <a href="#">c</a>                                                               | 24 |
| 5.12.1.2 | <a href="#">deg</a>                                                             | 24 |
| 5.12.1.3 | <a href="#">size</a>                                                            | 24 |
| 5.13     | <a href="#">messy_main_rnd_mtw_ja::gf2x_prime_obj Type Reference</a>            | 24 |
| 5.13.1   | <a href="#">Member Data Documentation</a>                                       | 24 |
| 5.13.1.1 | <a href="#">barrett_poly</a>                                                    | 24 |
| 5.13.1.2 | <a href="#">deg</a>                                                             | 25 |
| 5.13.1.3 | <a href="#">prime_poly</a>                                                      | 25 |
| 5.14     | <a href="#">messy_main_tools::ind2val Interface Reference</a>                   | 25 |
| 5.14.1   | <a href="#">Member Function/Subroutine Documentation</a>                        | 25 |
| 5.14.1.1 | <a href="#">ind2val_1d</a>                                                      | 25 |
| 5.14.1.2 | <a href="#">ind2val_2d</a>                                                      | 25 |
| 5.15     | <a href="#">messy_main_tools::iso2ind Interface Reference</a>                   | 25 |
| 5.15.1   | <a href="#">Member Function/Subroutine Documentation</a>                        | 25 |
| 5.15.1.1 | <a href="#">iso2ind_1d</a>                                                      | 26 |
| 5.15.1.2 | <a href="#">iso2ind_2d</a>                                                      | 26 |
| 5.16     | <a href="#">messy_main_tools_kp4_compress::kco_compress Interface Reference</a> | 26 |
| 5.16.1   | <a href="#">Constructor &amp; Destructor Documentation</a>                      | 26 |
| 5.16.1.1 | <a href="#">kco_compress</a>                                                    | 26 |
| 5.17     | <a href="#">messy_main_tools_kp4_compress::kco_finalize Interface Reference</a> | 26 |
| 5.17.1   | <a href="#">Constructor &amp; Destructor Documentation</a>                      | 27 |
| 5.17.1.1 | <a href="#">kco_finalize</a>                                                    | 27 |

|                                                                            |    |
|----------------------------------------------------------------------------|----|
| 5.18 messy_main_tools_kp4_compress::kco_initialize Interface Reference . . | 27 |
| 5.18.1 Constructor & Destructor Documentation . . . . .                    | 27 |
| 5.18.1.1 kco_initialize . . . . .                                          | 27 |
| 5.19 messy_cm_n_gasaq Module Reference . . . . .                           | 28 |
| 5.19.1 Member Function/Subroutine Documentation . . . . .                  | 29 |
| 5.19.1.1 add_all_alpha . . . . .                                           | 29 |
| 5.19.1.2 add_all_dryreac . . . . .                                         | 29 |
| 5.19.1.3 add_all_henry . . . . .                                           | 30 |
| 5.19.1.4 cmn_gasaq_initialize . . . . .                                    | 30 |
| 5.19.1.5 def_all_species . . . . .                                         | 30 |
| 5.19.1.6 final_check . . . . .                                             | 30 |
| 5.19.1.7 get_gasaq . . . . .                                               | 30 |
| 5.19.2 Member Data Documentation . . . . .                                 | 30 |
| 5.19.2.1 DUMMY . . . . .                                                   | 31 |
| 5.19.2.2 gasaq . . . . .                                                   | 31 |
| 5.19.2.3 MAXSIZE . . . . .                                                 | 31 |
| 5.19.2.4 n_gasaq . . . . .                                                 | 31 |
| 5.20 messy_cm_n_photol_mem Module Reference . . . . .                      | 31 |
| 5.20.1 Member Data Documentation . . . . .                                 | 34 |
| 5.20.1.1 ip_Br2 . . . . .                                                  | 34 |
| 5.20.1.2 ip_BrCl . . . . .                                                 | 34 |
| 5.20.1.3 ip_BrNO2 . . . . .                                                | 34 |
| 5.20.1.4 ip_BrNO3 . . . . .                                                | 34 |
| 5.20.1.5 ip_BrO . . . . .                                                  | 34 |
| 5.20.1.6 ip_C3H7I . . . . .                                                | 34 |
| 5.20.1.7 ip_C3O2 . . . . .                                                 | 34 |
| 5.20.1.8 ip_CCl4 . . . . .                                                 | 34 |
| 5.20.1.9 ip_CF2Cl2 . . . . .                                               | 34 |
| 5.20.1.10 ip_CF2ClBr . . . . .                                             | 34 |
| 5.20.1.11 ip_CF3Br . . . . .                                               | 34 |
| 5.20.1.12 ip_CFCI3 . . . . .                                               | 34 |
| 5.20.1.13 ip_CH2Br2 . . . . .                                              | 34 |
| 5.20.1.14 ip_CH2ClBr . . . . .                                             | 34 |
| 5.20.1.15 ip_CH2ClI . . . . .                                              | 34 |



|                                 |    |
|---------------------------------|----|
| 5.20.1.16 ip_CH2I2 . . . . .    | 34 |
| 5.20.1.17 ip_CH3Br . . . . .    | 34 |
| 5.20.1.18 ip_CH3CCl3 . . . . .  | 34 |
| 5.20.1.19 ip_CH3CHO . . . . .   | 34 |
| 5.20.1.20 ip_CH3Cl . . . . .    | 34 |
| 5.20.1.21 ip_CH3CO3H . . . . .  | 34 |
| 5.20.1.22 ip_CH3COCH3 . . . . . | 35 |
| 5.20.1.23 ip_CH3I . . . . .     | 35 |
| 5.20.1.24 ip_CH3NO3 . . . . .   | 35 |
| 5.20.1.25 ip_CH3O2 . . . . .    | 35 |
| 5.20.1.26 ip_CH3O2NO2 . . . . . | 35 |
| 5.20.1.27 ip_CH3ONO . . . . .   | 35 |
| 5.20.1.28 ip_CH3OOH . . . . .   | 35 |
| 5.20.1.29 ip_CH4 . . . . .      | 35 |
| 5.20.1.30 ip_CHBr3 . . . . .    | 35 |
| 5.20.1.31 ip_CHCl2Br . . . . .  | 35 |
| 5.20.1.32 ip_CHClBr2 . . . . .  | 35 |
| 5.20.1.33 ip_CHO . . . . .      | 35 |
| 5.20.1.34 ip_Cl2 . . . . .      | 35 |
| 5.20.1.35 ip_Cl2O2 . . . . .    | 35 |
| 5.20.1.36 ip_ClNO2 . . . . .    | 35 |
| 5.20.1.37 ip_ClNO3 . . . . .    | 35 |
| 5.20.1.38 ip_ClONO2 . . . . .   | 35 |
| 5.20.1.39 ip_CO2 . . . . .      | 35 |
| 5.20.1.40 ip_COH2 . . . . .     | 35 |
| 5.20.1.41 ip_CS2 . . . . .      | 35 |
| 5.20.1.42 ip_GLYOX . . . . .    | 35 |
| 5.20.1.43 ip_H2O . . . . .      | 35 |
| 5.20.1.44 ip_H2O1D . . . . .    | 35 |
| 5.20.1.45 ip_H2O2 . . . . .     | 35 |
| 5.20.1.46 ip_H2SO4 . . . . .    | 36 |
| 5.20.1.47 ip_HCl . . . . .      | 36 |
| 5.20.1.48 ip_HCOOH . . . . .    | 36 |
| 5.20.1.49 ip_HNO3 . . . . .     | 36 |

|                                  |    |
|----------------------------------|----|
| 5.20.1.50 ip_HNO4 . . . . .      | 36 |
| 5.20.1.51 ip_HOBr . . . . .      | 36 |
| 5.20.1.52 ip_HOCH2CHO . . . . .  | 36 |
| 5.20.1.53 ip_HOCl . . . . .      | 36 |
| 5.20.1.54 ip_HOI . . . . .       | 36 |
| 5.20.1.55 ip_HONO . . . . .      | 36 |
| 5.20.1.56 ip_I2 . . . . .        | 36 |
| 5.20.1.57 ip_IBr . . . . .       | 36 |
| 5.20.1.58 ip_ICl . . . . .       | 36 |
| 5.20.1.59 ip_INO2 . . . . .      | 36 |
| 5.20.1.60 ip_INO3 . . . . .      | 36 |
| 5.20.1.61 ip_IO . . . . .        | 36 |
| 5.20.1.62 ip_MACR . . . . .      | 36 |
| 5.20.1.63 IP_MAX . . . . .       | 36 |
| 5.20.1.64 ip_MGLYOX . . . . .    | 36 |
| 5.20.1.65 ip_MVK . . . . .       | 36 |
| 5.20.1.66 ip_N2 . . . . .        | 36 |
| 5.20.1.67 ip_N2_aurq . . . . .   | 36 |
| 5.20.1.68 ip_N2_b1 . . . . .     | 36 |
| 5.20.1.69 ip_N2_b2 . . . . .     | 36 |
| 5.20.1.70 ip_N2_b3 . . . . .     | 37 |
| 5.20.1.71 ip_N2O . . . . .       | 37 |
| 5.20.1.72 ip_N2O5 . . . . .      | 37 |
| 5.20.1.73 ip_N2p_em . . . . .    | 37 |
| 5.20.1.74 ip_N_N2D_em . . . . .  | 37 |
| 5.20.1.75 ip_NN2D . . . . .      | 37 |
| 5.20.1.76 ip_NO . . . . .        | 37 |
| 5.20.1.77 ip_NO2 . . . . .       | 37 |
| 5.20.1.78 ip_NO2O . . . . .      | 37 |
| 5.20.1.79 ip_NO3NOO . . . . .    | 37 |
| 5.20.1.80 ip_NOO2 . . . . .      | 37 |
| 5.20.1.81 ip_NOp . . . . .       | 37 |
| 5.20.1.82 ip_Np_N2D_em . . . . . | 37 |
| 5.20.1.83 ip_Np_N_em . . . . .   | 37 |

|                                                           |    |
|-----------------------------------------------------------|----|
| 5.20.1.84 ip_O1D . . . . .                                | 37 |
| 5.20.1.85 ip_O2 . . . . .                                 | 37 |
| 5.20.1.86 ip_O2_aurq . . . . .                            | 37 |
| 5.20.1.87 ip_O2_b1 . . . . .                              | 37 |
| 5.20.1.88 ip_O2_b1b2 . . . . .                            | 37 |
| 5.20.1.89 ip_O2_b2 . . . . .                              | 37 |
| 5.20.1.90 ip_O2p_em . . . . .                             | 37 |
| 5.20.1.91 ip_O3P . . . . .                                | 37 |
| 5.20.1.92 ip_O3PO1D . . . . .                             | 37 |
| 5.20.1.93 ip_O3Pp . . . . .                               | 37 |
| 5.20.1.94 ip_OCIO . . . . .                               | 38 |
| 5.20.1.95 ip_OCS . . . . .                                | 38 |
| 5.20.1.96 ip_Op_em . . . . .                              | 38 |
| 5.20.1.97 ip_Op_em_b . . . . .                            | 38 |
| 5.20.1.98 ip_Op_O_em . . . . .                            | 38 |
| 5.20.1.99 ip_PAN . . . . .                                | 38 |
| 5.20.1.100p_se_N2_b1 . . . . .                            | 38 |
| 5.20.1.101ip_se_N2_b2 . . . . .                           | 38 |
| 5.20.1.102p_se_N2_b3 . . . . .                            | 38 |
| 5.20.1.103p_se_N2_b4 . . . . .                            | 38 |
| 5.20.1.104p_se_O2_b1 . . . . .                            | 38 |
| 5.20.1.105p_se_O2_b2 . . . . .                            | 38 |
| 5.20.1.106p_se_Op_em . . . . .                            | 38 |
| 5.20.1.107p_SF6 . . . . .                                 | 38 |
| 5.20.1.108p_SO2 . . . . .                                 | 38 |
| 5.20.1.109p_SO3 . . . . .                                 | 38 |
| 5.20.1.110name . . . . .                                  | 38 |
| 5.21 messy_e4chem Module Reference . . . . .              | 39 |
| 5.21.1 Member Function/Subroutine Documentation . . . . . | 40 |
| 5.21.1.1 CHEMICS . . . . .                                | 41 |
| 5.21.1.2 CLSCAV . . . . .                                 | 42 |
| 5.21.1.3 e4chem_read_nml_ctrl . . . . .                   | 42 |
| 5.21.1.4 inisulnew . . . . .                              | 42 |
| 5.21.1.5 INRCGAS . . . . .                                | 42 |

|                                            |    |
|--------------------------------------------|----|
| 5.21.2 Member Data Documentation . . . . . | 42 |
| 5.21.2.1 ind_CCL4 . . . . .                | 42 |
| 5.21.2.2 ind_CF2Cl2 . . . . .              | 42 |
| 5.21.2.3 ind_CFCI3 . . . . .               | 42 |
| 5.21.2.4 ind_CH3CCL3 . . . . .             | 42 |
| 5.21.2.5 ind_CH3CL . . . . .               | 42 |
| 5.21.2.6 ind_CH3O2 . . . . .               | 42 |
| 5.21.2.7 ind_CH3OOH . . . . .              | 42 |
| 5.21.2.8 ind_CH4 . . . . .                 | 42 |
| 5.21.2.9 ind_CL . . . . .                  | 42 |
| 5.21.2.10 ind_CL2 . . . . .                | 42 |
| 5.21.2.11 ind_CL2O2 . . . . .              | 42 |
| 5.21.2.12 ind_CINO3 . . . . .              | 42 |
| 5.21.2.13 ind_CLO . . . . .                | 42 |
| 5.21.2.14 ind_CO . . . . .                 | 43 |
| 5.21.2.15 ind_CO2 . . . . .                | 43 |
| 5.21.2.16 ind_H . . . . .                  | 43 |
| 5.21.2.17 ind_H2 . . . . .                 | 43 |
| 5.21.2.18 ind_H2O . . . . .                | 43 |
| 5.21.2.19 ind_H2O2 . . . . .               | 43 |
| 5.21.2.20 ind_HCHO . . . . .               | 43 |
| 5.21.2.21 ind_HCl . . . . .                | 43 |
| 5.21.2.22 ind_HNO3 . . . . .               | 43 |
| 5.21.2.23 ind_HNO4 . . . . .               | 43 |
| 5.21.2.24 ind_HO2 . . . . .                | 43 |
| 5.21.2.25 ind_HO2AB . . . . .              | 43 |
| 5.21.2.26 ind_HOCl . . . . .               | 43 |
| 5.21.2.27 ind_ICE . . . . .                | 43 |
| 5.21.2.28 ind_N . . . . .                  | 43 |
| 5.21.2.29 ind_N2O . . . . .                | 43 |
| 5.21.2.30 ind_N2O5 . . . . .               | 43 |
| 5.21.2.31 ind_NAT . . . . .                | 43 |
| 5.21.2.32 ind_NO . . . . .                 | 43 |
| 5.21.2.33 ind_NO2 . . . . .                | 43 |

|                                                           |    |
|-----------------------------------------------------------|----|
| 5.21.2.34 ind_NO3 . . . . .                               | 43 |
| 5.21.2.35 ind_O1D . . . . .                               | 43 |
| 5.21.2.36 ind_O3 . . . . .                                | 43 |
| 5.21.2.37 ind_O3P . . . . .                               | 43 |
| 5.21.2.38 ind_OH . . . . .                                | 44 |
| 5.21.2.39 ind_OHAB . . . . .                              | 44 |
| 5.21.2.40 IRCTMAX . . . . .                               | 44 |
| 5.21.2.41 IRCTMIN . . . . .                               | 44 |
| 5.21.2.42 JDIFTE . . . . .                                | 44 |
| 5.21.2.43 JVALS . . . . .                                 | 44 |
| 5.21.2.44 ksul . . . . .                                  | 44 |
| 5.21.2.45 l_Brparam . . . . .                             | 44 |
| 5.21.2.46 l_fastscav . . . . .                            | 44 |
| 5.21.2.47 modstr . . . . .                                | 44 |
| 5.21.2.48 modver . . . . .                                | 44 |
| 5.21.2.49 NSPEC . . . . .                                 | 44 |
| 5.21.2.50 NSTCHPH . . . . .                               | 44 |
| 5.21.2.51 NUMRAT . . . . .                                | 44 |
| 5.21.2.52 NUMTEM . . . . .                                | 44 |
| 5.21.2.53 RCGAS . . . . .                                 | 44 |
| 5.21.2.54 SPC_NAMES . . . . .                             | 44 |
| 5.21.2.55 sulook . . . . .                                | 44 |
| 5.22 messy_e4chem_box Module Reference . . . . .          | 44 |
| 5.22.1 Member Function/Subroutine Documentation . . . . . | 45 |
| 5.22.1.1 e4chem_finish . . . . .                          | 45 |
| 5.22.1.2 e4chem_init . . . . .                            | 45 |
| 5.22.1.3 e4chem_physc . . . . .                           | 45 |
| 5.22.1.4 e4chem_result . . . . .                          | 46 |
| 5.22.1.5 x0 . . . . .                                     | 46 |
| 5.22.2 Member Data Documentation . . . . .                | 46 |
| 5.22.2.1 DANI . . . . .                                   | 46 |
| 5.22.2.2 DANIM . . . . .                                  | 46 |
| 5.22.2.3 DIAG_NAMES . . . . .                             | 46 |
| 5.22.2.4 jx . . . . .                                     | 46 |

|           |                                                          |    |
|-----------|----------------------------------------------------------|----|
| 5.22.2.5  | <a href="#">lwc</a>                                      | 46 |
| 5.22.2.6  | <a href="#">ncid_diag</a>                                | 46 |
| 5.22.2.7  | <a href="#">ncid_spec</a>                                | 46 |
| 5.22.2.8  | <a href="#">ncid_tracer</a>                              | 46 |
| 5.22.2.9  | <a href="#">NDIAG</a>                                    | 46 |
| 5.22.2.10 | <a href="#">unit_diag</a>                                | 46 |
| 5.22.2.11 | <a href="#">zdiag</a>                                    | 46 |
| 5.23      | <a href="#">messy_jval Module Reference</a>              | 47 |
| 5.23.1    | <a href="#">Member Function/Subroutine Documentation</a> | 49 |
| 5.23.1.1  | <a href="#">aerosol_data</a>                             | 49 |
| 5.23.1.2  | <a href="#">combine_o3_fields</a>                        | 49 |
| 5.23.1.3  | <a href="#">jval_cal_uv</a>                              | 49 |
| 5.23.1.4  | <a href="#">jval_read_nml_ctrl</a>                       | 49 |
| 5.23.1.5  | <a href="#">jval_solar_time_control</a>                  | 49 |
| 5.23.1.6  | <a href="#">jvalues</a>                                  | 50 |
| 5.23.1.7  | <a href="#">p1</a>                                       | 51 |
| 5.23.1.8  | <a href="#">p2</a>                                       | 51 |
| 5.23.1.9  | <a href="#">p3</a>                                       | 51 |
| 5.23.2    | <a href="#">Member Data Documentation</a>                | 51 |
| 5.23.2.1  | <a href="#">aabs</a>                                     | 51 |
| 5.23.2.2  | <a href="#">aext</a>                                     | 51 |
| 5.23.2.3  | <a href="#">ag</a>                                       | 51 |
| 5.23.2.4  | <a href="#">asca</a>                                     | 51 |
| 5.23.2.5  | <a href="#">b_la</a>                                     | 51 |
| 5.23.2.6  | <a href="#">c_la</a>                                     | 51 |
| 5.23.2.7  | <a href="#">crray</a>                                    | 51 |
| 5.23.2.8  | <a href="#">d_la</a>                                     | 51 |
| 5.23.2.9  | <a href="#">dens</a>                                     | 51 |
| 5.23.2.10 | <a href="#">dens_ref</a>                                 | 51 |
| 5.23.2.11 | <a href="#">dim55</a>                                    | 51 |
| 5.23.2.12 | <a href="#">dim58</a>                                    | 51 |
| 5.23.2.13 | <a href="#">dlv2</a>                                     | 51 |
| 5.23.2.14 | <a href="#">e_la</a>                                     | 51 |
| 5.23.2.15 | <a href="#">f0</a>                                       | 51 |

|                                 |    |
|---------------------------------|----|
| 5.23.2.16 f0max . . . . .       | 52 |
| 5.23.2.17 f0min . . . . .       | 52 |
| 5.23.2.18 fhuv_2d . . . . .     | 52 |
| 5.23.2.19 fhuvdna_2d . . . . .  | 52 |
| 5.23.2.20 fint . . . . .        | 52 |
| 5.23.2.21 finth . . . . .       | 52 |
| 5.23.2.22 fj_corr . . . . .     | 52 |
| 5.23.2.23 flux . . . . .        | 52 |
| 5.23.2.24 fmax . . . . .        | 52 |
| 5.23.2.25 fmin . . . . .        | 52 |
| 5.23.2.26 i0 . . . . .          | 52 |
| 5.23.2.27 i1 . . . . .          | 52 |
| 5.23.2.28 i2 . . . . .          | 52 |
| 5.23.2.29 i3 . . . . .          | 52 |
| 5.23.2.30 iu0 . . . . .         | 52 |
| 5.23.2.31 jval_2d . . . . .     | 52 |
| 5.23.2.32 klev . . . . .        | 52 |
| 5.23.2.33 kproma_day . . . . .  | 52 |
| 5.23.2.34 lp . . . . .          | 52 |
| 5.23.2.35 MAXWAV . . . . .      | 52 |
| 5.23.2.36 modstr . . . . .      | 52 |
| 5.23.2.37 modver . . . . .      | 53 |
| 5.23.2.38 phi_la . . . . .      | 53 |
| 5.23.2.39 press . . . . .       | 53 |
| 5.23.2.40 press_ref . . . . .   | 53 |
| 5.23.2.41 qy_CH3COCH3 . . . . . | 53 |
| 5.23.2.42 r_m . . . . .         | 53 |
| 5.23.2.43 r_o2 . . . . .        | 53 |
| 5.23.2.44 r_sol . . . . .       | 53 |
| 5.23.2.45 rh_o2_2d . . . . .    | 53 |
| 5.23.2.46 rh_o3_2d . . . . .    | 53 |
| 5.23.2.47 sig_top_o2 . . . . .  | 53 |
| 5.23.2.48 sig_top_o3 . . . . .  | 53 |
| 5.23.2.49 SR_toa_flux . . . . . | 53 |

|                                                           |    |
|-----------------------------------------------------------|----|
| 5.23.2.50 temp . . . . .                                  | 53 |
| 5.23.2.51 tnorm . . . . .                                 | 53 |
| 5.23.2.52 tnorm_sr . . . . .                              | 53 |
| 5.23.2.53 v2s_m . . . . .                                 | 53 |
| 5.23.2.54 v3_du1 . . . . .                                | 53 |
| 5.23.2.55 v3_du2 . . . . .                                | 53 |
| 5.24 messy_jval_box Module Reference . . . . .            | 53 |
| 5.24.1 Member Function/Subroutine Documentation . . . . . | 54 |
| 5.24.1.1 jval_finish . . . . .                            | 54 |
| 5.24.1.2 jval_init . . . . .                              | 54 |
| 5.24.1.3 jval_physc . . . . .                             | 55 |
| 5.24.1.4 jval_result . . . . .                            | 55 |
| 5.24.2 Member Data Documentation . . . . .                | 55 |
| 5.24.2.1 acfc . . . . .                                   | 55 |
| 5.24.2.2 albedo . . . . .                                 | 55 |
| 5.24.2.3 clp . . . . .                                    | 55 |
| 5.24.2.4 jpress . . . . .                                 | 55 |
| 5.24.2.5 jrhun . . . . .                                  | 55 |
| 5.24.2.6 jtemp . . . . .                                  | 55 |
| 5.24.2.7 l_heating . . . . .                              | 55 |
| 5.24.2.8 lmidatm . . . . .                                | 55 |
| 5.24.2.9 ncid_jval . . . . .                              | 55 |
| 5.24.2.10 nlev . . . . .                                  | 55 |
| 5.24.2.11 nsza . . . . .                                  | 55 |
| 5.24.2.12 pbllev . . . . .                                | 55 |
| 5.24.2.13 relo3 . . . . .                                 | 55 |
| 5.24.2.14 slf . . . . .                                   | 55 |
| 5.24.2.15 v3 . . . . .                                    | 55 |
| 5.25 messy_main_blather Module Reference . . . . .        | 55 |
| 5.25.1 Member Function/Subroutine Documentation . . . . . | 56 |
| 5.25.1.1 end_message . . . . .                            | 56 |
| 5.25.1.2 info . . . . .                                   | 56 |
| 5.25.1.3 start_message . . . . .                          | 56 |
| 5.25.1.4 warning . . . . .                                | 56 |



---

|                                                          |    |
|----------------------------------------------------------|----|
| 5.26 messy_main_constants_mem Module Reference . . . . . | 56 |
| 5.26.1 Member Data Documentation . . . . .               | 58 |
| 5.26.1.1 alf . . . . .                                   | 58 |
| 5.26.1.2 als . . . . .                                   | 58 |
| 5.26.1.3 alv . . . . .                                   | 58 |
| 5.26.1.4 AM . . . . .                                    | 58 |
| 5.26.1.5 atm2Pa . . . . .                                | 58 |
| 5.26.1.6 BIG_DP . . . . .                                | 59 |
| 5.26.1.7 c_light . . . . .                               | 59 |
| 5.26.1.8 c_vKar . . . . .                                | 59 |
| 5.26.1.9 cal2J . . . . .                                 | 59 |
| 5.26.1.10 ccwmin . . . . .                               | 59 |
| 5.26.1.11 ceffmax . . . . .                              | 59 |
| 5.26.1.12 ceffmin . . . . .                              | 59 |
| 5.26.1.13 cemiss . . . . .                               | 59 |
| 5.26.1.14 clw . . . . .                                  | 59 |
| 5.26.1.15 cp_air . . . . .                               | 59 |
| 5.26.1.16 cpv . . . . .                                  | 59 |
| 5.26.1.17 crae . . . . .                                 | 59 |
| 5.26.1.18 csw . . . . .                                  | 59 |
| 5.26.1.19 ctfreez . . . . .                              | 59 |
| 5.26.1.20 dp . . . . .                                   | 59 |
| 5.26.1.21 DTR . . . . .                                  | 59 |
| 5.26.1.22 ELCH . . . . .                                 | 59 |
| 5.26.1.23 FLAGGED_BAD . . . . .                          | 59 |
| 5.26.1.24 g . . . . .                                    | 59 |
| 5.26.1.25 h_Planck . . . . .                             | 59 |
| 5.26.1.26 HLINE1 . . . . .                               | 59 |
| 5.26.1.27 HLINE2 . . . . .                               | 60 |
| 5.26.1.28 HLINE3 . . . . .                               | 60 |
| 5.26.1.29 HUGE_DP . . . . .                              | 60 |
| 5.26.1.30 i4 . . . . .                                   | 60 |
| 5.26.1.31 i8 . . . . .                                   | 60 |
| 5.26.1.32 k_B . . . . .                                  | 60 |

---

|                                    |    |
|------------------------------------|----|
| 5.26.1.33 M12C . . . . .           | 60 |
| 5.26.1.34 M13C . . . . .           | 60 |
| 5.26.1.35 M18O . . . . .           | 60 |
| 5.26.1.36 M_air . . . . .          | 60 |
| 5.26.1.37 M_H2O . . . . .          | 60 |
| 5.26.1.38 M_HDO . . . . .          | 60 |
| 5.26.1.39 M_HH18O . . . . .        | 60 |
| 5.26.1.40 M_N2 . . . . .           | 60 |
| 5.26.1.41 M_O2 . . . . .           | 60 |
| 5.26.1.42 M_O3 . . . . .           | 60 |
| 5.26.1.43 MBr . . . . .            | 60 |
| 5.26.1.44 MC . . . . .             | 60 |
| 5.26.1.45 MCl . . . . .            | 60 |
| 5.26.1.46 MD . . . . .             | 60 |
| 5.26.1.47 MF . . . . .             | 61 |
| 5.26.1.48 MH . . . . .             | 61 |
| 5.26.1.49 MHg . . . . .            | 61 |
| 5.26.1.50 MI . . . . .             | 61 |
| 5.26.1.51 MM_eps . . . . .         | 61 |
| 5.26.1.52 MN . . . . .             | 61 |
| 5.26.1.53 MNa . . . . .            | 61 |
| 5.26.1.54 MO . . . . .             | 61 |
| 5.26.1.55 modstr . . . . .         | 61 |
| 5.26.1.56 modver . . . . .         | 61 |
| 5.26.1.57 MS . . . . .             | 61 |
| 5.26.1.58 N_A . . . . .            | 61 |
| 5.26.1.59 N_A_kmol . . . . .       | 61 |
| 5.26.1.60 nerr . . . . .           | 61 |
| 5.26.1.61 omega . . . . .          | 61 |
| 5.26.1.62 OneDay . . . . .         | 61 |
| 5.26.1.63 OneSiderialDay . . . . . | 61 |
| 5.26.1.64 pi . . . . .             | 61 |
| 5.26.1.65 PI_2 . . . . .           | 61 |
| 5.26.1.66 R_gas . . . . .          | 61 |

|                                                           |    |
|-----------------------------------------------------------|----|
| 5.26.1.67 radius_earth . . . . .                          | 61 |
| 5.26.1.68 rd . . . . .                                    | 62 |
| 5.26.1.69 rho_H2O . . . . .                               | 62 |
| 5.26.1.70 rho_sea . . . . .                               | 62 |
| 5.26.1.71 RTD . . . . .                                   | 62 |
| 5.26.1.72 rv . . . . .                                    | 62 |
| 5.26.1.73 solc . . . . .                                  | 62 |
| 5.26.1.74 sp . . . . .                                    | 62 |
| 5.26.1.75 stbo . . . . .                                  | 62 |
| 5.26.1.76 stDTDZ . . . . .                                | 62 |
| 5.26.1.77 STRLEN_KPPSPECIES . . . . .                     | 62 |
| 5.26.1.78 STRLEN_LONG . . . . .                           | 62 |
| 5.26.1.79 STRLEN_MEDIUM . . . . .                         | 62 |
| 5.26.1.80 STRLEN_SHORT . . . . .                          | 62 |
| 5.26.1.81 STRLEN_ULONG . . . . .                          | 62 |
| 5.26.1.82 STRLEN_VLONG . . . . .                          | 62 |
| 5.26.1.83 STRLEN_XLONG . . . . .                          | 62 |
| 5.26.1.84 T0 . . . . .                                    | 62 |
| 5.26.1.85 T0_INV . . . . .                                | 62 |
| 5.26.1.86 TINY_DP . . . . .                               | 62 |
| 5.26.1.87 tmelt . . . . .                                 | 62 |
| 5.26.1.88 tttrip . . . . .                                | 62 |
| 5.26.1.89 TWOPI . . . . .                                 | 62 |
| 5.26.1.90 vtmpc1 . . . . .                                | 63 |
| 5.26.1.91 vtmpc2 . . . . .                                | 63 |
| 5.26.1.92 wp . . . . .                                    | 63 |
| 5.27 messy_main_control_cb Module Reference . . . . .     | 63 |
| 5.27.1 Member Function/Subroutine Documentation . . . . . | 63 |
| 5.27.1.1 messy_finish . . . . .                           | 63 |
| 5.27.1.2 messy_init . . . . .                             | 63 |
| 5.27.1.3 messy_physc . . . . .                            | 63 |
| 5.27.1.4 messy_result . . . . .                           | 63 |
| 5.28 messy_main_rnd Module Reference . . . . .            | 63 |
| 5.28.1 Member Function/Subroutine Documentation . . . . . | 65 |

|           |                                                          |    |
|-----------|----------------------------------------------------------|----|
| 5.28.1.1  | <a href="#">rnd_finish</a>                               | 65 |
| 5.28.1.2  | <a href="#">rnd_init</a>                                 | 65 |
| 5.28.1.3  | <a href="#">rnd_jump_2</a>                               | 65 |
| 5.28.1.4  | <a href="#">rnd_jump_n</a>                               | 65 |
| 5.28.1.5  | <a href="#">rnd_number</a>                               | 65 |
| 5.28.1.6  | <a href="#">rnd_seed</a>                                 | 65 |
| 5.28.2    | <a href="#">Member Data Documentation</a>                | 65 |
| 5.28.2.1  | <a href="#">ID_MAX</a>                                   | 65 |
| 5.28.2.2  | <a href="#">lpoly</a>                                    | 65 |
| 5.28.2.3  | <a href="#">modstr</a>                                   | 65 |
| 5.28.2.4  | <a href="#">modver</a>                                   | 65 |
| 5.28.2.5  | <a href="#">N_MAX_EXP</a>                                | 65 |
| 5.28.2.6  | <a href="#">nstate</a>                                   | 65 |
| 5.28.2.7  | <a href="#">pcoeff</a>                                   | 65 |
| 5.28.2.8  | <a href="#">RND_DIM_NAME</a>                             | 65 |
| 5.28.2.9  | <a href="#">RND_F90</a>                                  | 65 |
| 5.28.2.10 | <a href="#">RND_F90_GAUSS</a>                            | 65 |
| 5.28.2.11 | <a href="#">RND_LUX</a>                                  | 66 |
| 5.28.2.12 | <a href="#">RND_LUX_GAUSS</a>                            | 66 |
| 5.28.2.13 | <a href="#">RND_MAX_METHOD</a>                           | 66 |
| 5.28.2.14 | <a href="#">rnd_method</a>                               | 66 |
| 5.28.2.15 | <a href="#">RND_MTW</a>                                  | 66 |
| 5.28.2.16 | <a href="#">RND_MTW_GAUSS</a>                            | 66 |
| 5.28.2.17 | <a href="#">RND_REPR_NAME</a>                            | 66 |
| 5.28.2.18 | <a href="#">state</a>                                    | 66 |
| 5.29      | <a href="#">messy_main_rnd_lux Module Reference</a>      | 66 |
| 5.29.1    | <a href="#">Member Function/Subroutine Documentation</a> | 67 |
| 5.29.1.1  | <a href="#">ranlux</a>                                   | 67 |
| 5.29.1.2  | <a href="#">rluxat</a>                                   | 67 |
| 5.29.1.3  | <a href="#">rluxgo</a>                                   | 67 |
| 5.29.1.4  | <a href="#">rluxin</a>                                   | 67 |
| 5.29.1.5  | <a href="#">rluxut</a>                                   | 67 |
| 5.29.2    | <a href="#">Member Data Documentation</a>                | 67 |
| 5.29.2.1  | <a href="#">carry</a>                                    | 67 |

|           |                                          |    |
|-----------|------------------------------------------|----|
| 5.29.2.2  | i24                                      | 67 |
| 5.29.2.3  | icons                                    | 67 |
| 5.29.2.4  | igiga                                    | 67 |
| 5.29.2.5  | in24                                     | 67 |
| 5.29.2.6  | inseed                                   | 67 |
| 5.29.2.7  | isdext                                   | 67 |
| 5.29.2.8  | itwo24                                   | 67 |
| 5.29.2.9  | j24                                      | 68 |
| 5.29.2.10 | jsdflt                                   | 68 |
| 5.29.2.11 | jseed                                    | 68 |
| 5.29.2.12 | kount                                    | 68 |
| 5.29.2.13 | luxlev                                   | 68 |
| 5.29.2.14 | lxdflt                                   | 68 |
| 5.29.2.15 | maxlev                                   | 68 |
| 5.29.2.16 | mkount                                   | 68 |
| 5.29.2.17 | ndskip                                   | 68 |
| 5.29.2.18 | next                                     | 68 |
| 5.29.2.19 | notyet                                   | 68 |
| 5.29.2.20 | nskip                                    | 68 |
| 5.29.2.21 | seeds                                    | 68 |
| 5.29.2.22 | twom12                                   | 68 |
| 5.29.2.23 | twom24                                   | 68 |
| 5.29.2.24 | twop12                                   | 68 |
| 5.30      | messy_main_rnd_mtw Module Reference      | 68 |
| 5.30.1    | Member Function/Subroutine Documentation | 69 |
| 5.30.1.1  | genrand_int31                            | 69 |
| 5.30.1.2  | genrand_int32                            | 69 |
| 5.30.1.3  | genrand_real1                            | 69 |
| 5.30.1.4  | genrand_real2                            | 69 |
| 5.30.1.5  | genrand_real3                            | 69 |
| 5.30.1.6  | genrand_res53                            | 70 |
| 5.30.1.7  | init_by_array                            | 70 |
| 5.30.1.8  | init_genrand                             | 70 |
| 5.30.1.9  | uiadd                                    | 70 |

|                                                           |    |
|-----------------------------------------------------------|----|
| 5.30.1.10 uimlt . . . . .                                 | 70 |
| 5.30.1.11 uisub . . . . .                                 | 70 |
| 5.30.2 Member Data Documentation . . . . .                | 70 |
| 5.30.2.1 dobl . . . . .                                   | 70 |
| 5.30.2.2 flot . . . . .                                   | 70 |
| 5.30.2.3 hbs . . . . .                                    | 70 |
| 5.30.2.4 intg . . . . .                                   | 70 |
| 5.30.2.5 long . . . . .                                   | 70 |
| 5.30.2.6 m . . . . .                                      | 70 |
| 5.30.2.7 mt . . . . .                                     | 70 |
| 5.30.2.8 mti . . . . .                                    | 70 |
| 5.30.2.9 mtinit . . . . .                                 | 70 |
| 5.30.2.10 n . . . . .                                     | 70 |
| 5.30.2.11 qbs . . . . .                                   | 70 |
| 5.30.2.12 tbs . . . . .                                   | 71 |
| 5.30.2.13 wi . . . . .                                    | 71 |
| 5.30.2.14 wl . . . . .                                    | 71 |
| 5.30.2.15 wr . . . . .                                    | 71 |
| 5.31 messy_main_rnd_mtw_ja Module Reference . . . . .     | 71 |
| 5.31.1 Member Function/Subroutine Documentation . . . . . | 73 |
| 5.31.1.1 deg_i32 . . . . .                                | 73 |
| 5.31.1.2 deg_i64 . . . . .                                | 73 |
| 5.31.1.3 f_get_coeff . . . . .                            | 73 |
| 5.31.1.4 get_deg . . . . .                                | 73 |
| 5.31.1.5 get_size . . . . .                               | 73 |
| 5.31.1.6 gf2x_add . . . . .                               | 74 |
| 5.31.1.7 gf2x_add_assign . . . . .                        | 74 |
| 5.31.1.8 gf2x_assign . . . . .                            | 74 |
| 5.31.1.9 gf2x_delete . . . . .                            | 74 |
| 5.31.1.10 gf2x_delete_prime . . . . .                     | 74 |
| 5.31.1.11 gf2x_div . . . . .                              | 74 |
| 5.31.1.12 gf2x_div_by_x . . . . .                         | 74 |
| 5.31.1.13 gf2x_divrem . . . . .                           | 74 |
| 5.31.1.14 gf2x_mod_by_x . . . . .                         | 74 |

|                                             |    |
|---------------------------------------------|----|
| 5.31.1.15 gf2x_mult_assign_kara . . . . .   | 74 |
| 5.31.1.16 gf2x_mult_assign_normal . . . . . | 74 |
| 5.31.1.17 gf2x_mult_by_x . . . . .          | 74 |
| 5.31.1.18 gf2x_mult_kara . . . . .          | 74 |
| 5.31.1.19 gf2x_mult_normal . . . . .        | 74 |
| 5.31.1.20 gf2x_new . . . . .                | 75 |
| 5.31.1.21 gf2x_pow . . . . .                | 75 |
| 5.31.1.22 gf2x_pow_mod . . . . .            | 75 |
| 5.31.1.23 gf2x_pow_pow_2 . . . . .          | 75 |
| 5.31.1.24 gf2x_print_bit . . . . .          | 75 |
| 5.31.1.25 gf2x_print_hex . . . . .          | 75 |
| 5.31.1.26 gf2x_rem . . . . .                | 75 |
| 5.31.1.27 gf2x_rem_barrett . . . . .        | 75 |
| 5.31.1.28 gf2x_set_coef . . . . .           | 75 |
| 5.31.1.29 gf2x_set_prime . . . . .          | 75 |
| 5.31.1.30 gf2x_shift . . . . .              | 75 |
| 5.31.1.31 gf2x_square . . . . .             | 75 |
| 5.31.1.32 is_zero . . . . .                 | 75 |
| 5.31.1.33 mt_jump_ahead . . . . .           | 76 |
| 5.31.1.34 mt_matvec . . . . .               | 76 |
| 5.31.1.35 mult_i32 . . . . .                | 76 |
| 5.31.1.36 mult_i32_old . . . . .            | 76 |
| 5.31.1.37 shift_i32 . . . . .               | 76 |
| 5.31.1.38 square_i32 . . . . .              | 76 |
| 5.31.2 Member Data Documentation . . . . .  | 76 |
| 5.31.2.1 avec . . . . .                     | 76 |
| 5.31.2.2 INT32 . . . . .                    | 76 |
| 5.31.2.3 INT64 . . . . .                    | 76 |
| 5.31.2.4 MAX_KARA . . . . .                 | 76 |
| 5.31.2.5 mm . . . . .                       | 76 |
| 5.31.2.6 MT19937_LMASK . . . . .            | 76 |
| 5.31.2.7 MT19937_M . . . . .                | 76 |
| 5.31.2.8 MT19937_MAG . . . . .              | 77 |
| 5.31.2.9 MT19937_MASKB . . . . .            | 77 |

|                                                           |    |
|-----------------------------------------------------------|----|
| 5.31.2.10 MT19937_MASKC . . . . .                         | 77 |
| 5.31.2.11 MT19937_MATA . . . . .                          | 77 |
| 5.31.2.12 MT19937_N . . . . .                             | 77 |
| 5.31.2.13 MT19937_R . . . . .                             | 77 |
| 5.31.2.14 MT19937_SHFT0 . . . . .                         | 77 |
| 5.31.2.15 MT19937_SHFT1 . . . . .                         | 77 |
| 5.31.2.16 MT19937_SHFTB . . . . .                         | 77 |
| 5.31.2.17 MT19937_SHFTC . . . . .                         | 77 |
| 5.31.2.18 MT19937_UMASK . . . . .                         | 77 |
| 5.31.2.19 MT19937_W . . . . .                             | 77 |
| 5.31.2.20 MT19937_WMASK . . . . .                         | 77 |
| 5.31.2.21 nn . . . . .                                    | 77 |
| 5.31.2.22 REAL64 . . . . .                                | 77 |
| 5.31.2.23 rr . . . . .                                    | 77 |
| 5.31.2.24 ww . . . . .                                    | 78 |
| 5.32 messy_main_timer Module Reference . . . . .          | 78 |
| 5.32.1 Member Function/Subroutine Documentation . . . . . | 81 |
| 5.32.1.1 add_date . . . . .                               | 81 |
| 5.32.1.2 copy_date . . . . .                              | 81 |
| 5.32.1.3 date_get . . . . .                               | 81 |
| 5.32.1.4 date_get_components . . . . .                    | 81 |
| 5.32.1.5 date_set . . . . .                               | 81 |
| 5.32.1.6 date_set_components . . . . .                    | 81 |
| 5.32.1.7 eval_time_str . . . . .                          | 81 |
| 5.32.1.8 gregor2julian . . . . .                          | 81 |
| 5.32.1.9 if_equal . . . . .                               | 82 |
| 5.32.1.10 if_less . . . . .                               | 82 |
| 5.32.1.11 is_init . . . . .                               | 82 |
| 5.32.1.12 julian2gregor . . . . .                         | 82 |
| 5.32.1.13 julian_day . . . . .                            | 82 |
| 5.32.1.14 JulianMonthLength . . . . .                     | 82 |
| 5.32.1.15 JulianYearLength . . . . .                      | 82 |
| 5.32.1.16 MonthLength . . . . .                           | 82 |
| 5.32.1.17 print_date . . . . .                            | 82 |



|           |                                           |    |
|-----------|-------------------------------------------|----|
| 5.32.1.18 | <a href="#">print_date_components</a>     | 82 |
| 5.32.1.19 | <a href="#">time_span_d</a>               | 82 |
| 5.32.1.20 | <a href="#">time_span_s</a>               | 82 |
| 5.32.1.21 | <a href="#">timer_add_date</a>            | 83 |
| 5.32.1.22 | <a href="#">timer_get_calendar</a>        | 83 |
| 5.32.1.23 | <a href="#">timer_get_date_myd</a>        | 83 |
| 5.32.1.24 | <a href="#">timer_get_date_str</a>        | 83 |
| 5.32.1.25 | <a href="#">timer_get_delta_time</a>      | 83 |
| 5.32.1.26 | <a href="#">timer_get_labort</a>          | 83 |
| 5.32.1.27 | <a href="#">timer_get_lresume</a>         | 83 |
| 5.32.1.28 | <a href="#">timer_get_no_cycles</a>       | 83 |
| 5.32.1.29 | <a href="#">timer_set_calendar</a>        | 83 |
| 5.32.1.30 | <a href="#">timer_set_date_myd</a>        | 83 |
| 5.32.1.31 | <a href="#">timer_set_date_myd_ds</a>     | 83 |
| 5.32.1.32 | <a href="#">timer_set_date_str</a>        | 83 |
| 5.32.1.33 | <a href="#">timer_set_date_str_ds</a>     | 84 |
| 5.32.1.34 | <a href="#">timer_set_delta_time</a>      | 84 |
| 5.32.1.35 | <a href="#">timer_set_labort</a>          | 84 |
| 5.32.1.36 | <a href="#">timer_set_lresume</a>         | 84 |
| 5.32.1.37 | <a href="#">timer_set_no_cycles</a>       | 84 |
| 5.32.1.38 | <a href="#">timer_set_time_step_len</a>   | 84 |
| 5.32.1.39 | <a href="#">utc2lt</a>                    | 84 |
| 5.32.1.40 | <a href="#">YearDay</a>                   | 84 |
| 5.32.1.41 | <a href="#">YearLength</a>                | 84 |
| 5.32.2    | <a href="#">Member Data Documentation</a> | 84 |
| 5.32.2.1  | <a href="#">CAL_360D</a>                  | 84 |
| 5.32.2.2  | <a href="#">CAL_JULIAN</a>                | 84 |
| 5.32.2.3  | <a href="#">CAL_TYPE</a>                  | 84 |
| 5.32.2.4  | <a href="#">CALENDER</a>                  | 84 |
| 5.32.2.5  | <a href="#">CMONTHS</a>                   | 84 |
| 5.32.2.6  | <a href="#">current_date</a>              | 84 |
| 5.32.2.7  | <a href="#">current_time_step</a>         | 84 |
| 5.32.2.8  | <a href="#">DAY</a>                       | 84 |
| 5.32.2.9  | <a href="#">DAY_NEXT</a>                  | 85 |

|                                       |    |
|---------------------------------------|----|
| 5.32.2.10 DAY_START . . . . .         | 85 |
| 5.32.2.11 DAYOFYEAR . . . . .         | 85 |
| 5.32.2.12 delta_time . . . . .        | 85 |
| 5.32.2.13 HOUR . . . . .              | 85 |
| 5.32.2.14 HOUR_NEXT . . . . .         | 85 |
| 5.32.2.15 HOUR_START . . . . .        | 85 |
| 5.32.2.16 INIT_STEP . . . . .         | 85 |
| 5.32.2.17 JULIAN_DATE_START . . . . . | 85 |
| 5.32.2.18 l_rerun . . . . .           | 85 |
| 5.32.2.19 L_TRIGGER_RESTART . . . . . | 85 |
| 5.32.2.20 LABORT . . . . .            | 85 |
| 5.32.2.21 lbreak . . . . .            | 85 |
| 5.32.2.22 lcycbreak . . . . .         | 85 |
| 5.32.2.23 LDEBUG . . . . .            | 85 |
| 5.32.2.24 LDEBUG2 . . . . .           | 85 |
| 5.32.2.25 lfirst_cycle . . . . .      | 85 |
| 5.32.2.26 lforcedtime . . . . .       | 85 |
| 5.32.2.27 lresume . . . . .           | 85 |
| 5.32.2.28 lstart . . . . .            | 85 |
| 5.32.2.29 lstop . . . . .             | 85 |
| 5.32.2.30 MINUTE . . . . .            | 85 |
| 5.32.2.31 MINUTE_NEXT . . . . .       | 85 |
| 5.32.2.32 MINUTE_START . . . . .      | 85 |
| 5.32.2.33 modstr . . . . .            | 86 |
| 5.32.2.34 modver . . . . .            | 86 |
| 5.32.2.35 MONTH . . . . .             | 86 |
| 5.32.2.36 MONTH_NEXT . . . . .        | 86 |
| 5.32.2.37 MONTH_START . . . . .       | 86 |
| 5.32.2.38 next_date . . . . .         | 86 |
| 5.32.2.39 NO_CYCLES . . . . .         | 86 |
| 5.32.2.40 NO_DAYS . . . . .           | 86 |
| 5.32.2.41 NO_STEPS . . . . .          | 86 |
| 5.32.2.42 previous_date . . . . .     | 86 |
| 5.32.2.43 rerun_stop_date . . . . .   | 86 |

|           |                                          |    |
|-----------|------------------------------------------|----|
| 5.32.2.44 | resume_date                              | 86 |
| 5.32.2.45 | SECOND                                   | 86 |
| 5.32.2.46 | SECOND_NEXT                              | 86 |
| 5.32.2.47 | SECOND_START                             | 86 |
| 5.32.2.48 | start_date                               | 86 |
| 5.32.2.49 | stop_date                                | 86 |
| 5.32.2.50 | time_step_len                            | 86 |
| 5.32.2.51 | YEAR                                     | 86 |
| 5.32.2.52 | YEAR_NEXT                                | 86 |
| 5.32.2.53 | YEAR_START                               | 86 |
| 5.33      | messy_main_tools Module Reference        | 87 |
| 5.33.1    | Member Function/Subroutine Documentation | 89 |
| 5.33.1.1  | bilin_weight                             | 89 |
| 5.33.1.2  | cair_trad                                | 89 |
| 5.33.1.3  | cair_wmo                                 | 89 |
| 5.33.1.4  | calc_hybrid_coeff                        | 89 |
| 5.33.1.5  | CalcTimeAngles                           | 89 |
| 5.33.1.6  | ERRFUNC                                  | 89 |
| 5.33.1.7  | find_next_free_unit                      | 89 |
| 5.33.1.8  | fliparray                                | 89 |
| 5.33.1.9  | full2half                                | 89 |
| 5.33.1.10 | ind2val_1d                               | 90 |
| 5.33.1.11 | ind2val_2d                               | 90 |
| 5.33.1.12 | init_convect_tables                      | 90 |
| 5.33.1.13 | int2str                                  | 90 |
| 5.33.1.14 | interpol_mid2stag                        | 90 |
| 5.33.1.15 | interpol_stag2mid                        | 90 |
| 5.33.1.16 | iso2ind_1d                               | 90 |
| 5.33.1.17 | iso2ind_2d                               | 90 |
| 5.33.1.18 | layerthickness                           | 90 |
| 5.33.1.19 | mass_density                             | 90 |
| 5.33.1.20 | match_wild                               | 90 |
| 5.33.1.21 | nl_index                                 | 90 |
| 5.33.1.22 | nn_index                                 | 91 |

|                                            |    |
|--------------------------------------------|----|
| 5.33.1.23 ns_index . . . . .               | 91 |
| 5.33.1.24 psat_mk . . . . .                | 91 |
| 5.33.1.25 read_nml_check . . . . .         | 91 |
| 5.33.1.26 read_nml_close . . . . .         | 91 |
| 5.33.1.27 read_nml_open . . . . .          | 91 |
| 5.33.1.28 rel2specchum . . . . .           | 91 |
| 5.33.1.29 rel2specchumwmo . . . . .        | 91 |
| 5.33.1.30 relhum2mr . . . . .              | 91 |
| 5.33.1.31 relhumwmo2mr . . . . .           | 91 |
| 5.33.1.32 remap_bounds1 . . . . .          | 91 |
| 5.33.1.33 remap_bounds2 . . . . .          | 91 |
| 5.33.1.34 remap_bounds3 . . . . .          | 92 |
| 5.33.1.35 remap_bounds4 . . . . .          | 92 |
| 5.33.1.36 rh2mr . . . . .                  | 92 |
| 5.33.1.37 spec2relhum . . . . .            | 92 |
| 5.33.1.38 spec2relhum_q . . . . .          | 92 |
| 5.33.1.39 spec2relhumwmo . . . . .         | 92 |
| 5.33.1.40 Spline1D . . . . .               | 92 |
| 5.33.1.41 Splint1D . . . . .               | 92 |
| 5.33.1.42 str2chob . . . . .               | 92 |
| 5.33.1.43 str2num_integer . . . . .        | 92 |
| 5.33.1.44 str2num_real_dp . . . . .        | 92 |
| 5.33.1.45 str2num_real_sp . . . . .        | 93 |
| 5.33.1.46 str_integer . . . . .            | 93 |
| 5.33.1.47 str_logical . . . . .            | 93 |
| 5.33.1.48 str_real_dp . . . . .            | 93 |
| 5.33.1.49 str_real_sp . . . . .            | 93 |
| 5.33.1.50 strcrack . . . . .               | 93 |
| 5.33.1.51 ucase . . . . .                  | 93 |
| 5.33.2 Member Data Documentation . . . . . | 93 |
| 5.33.2.1 jptlucu1 . . . . .                | 93 |
| 5.33.2.2 jptlucu2 . . . . .                | 93 |
| 5.33.2.3 tlucua . . . . .                  | 93 |
| 5.33.2.4 tlucuaw . . . . .                 | 93 |

|           |                                                          |    |
|-----------|----------------------------------------------------------|----|
| 5.33.2.5  | tlucub . . . . .                                         | 93 |
| 5.33.2.6  | tlucuc . . . . .                                         | 93 |
| 5.34      | messy_main_tools_kp4_compress Module Reference . . . . . | 94 |
| 5.34.1    | Member Function/Subroutine Documentation . . . . .       | 94 |
| 5.34.1.1  | kco_compress . . . . .                                   | 94 |
| 5.34.1.2  | kco_finalize . . . . .                                   | 95 |
| 5.34.1.3  | kco_initialize . . . . .                                 | 95 |
| 5.34.2    | Member Data Documentation . . . . .                      | 95 |
| 5.34.2.1  | cell_done . . . . .                                      | 95 |
| 5.34.2.2  | done_check . . . . .                                     | 95 |
| 5.34.2.3  | dp . . . . .                                             | 95 |
| 5.34.2.4  | f_done . . . . .                                         | 95 |
| 5.34.2.5  | ierr_done . . . . .                                      | 95 |
| 5.34.2.6  | index_org . . . . .                                      | 95 |
| 5.34.2.7  | index_step . . . . .                                     | 95 |
| 5.34.2.8  | Kacc_done . . . . .                                      | 95 |
| 5.34.2.9  | kpoints . . . . .                                        | 95 |
| 5.34.2.10 | kpoints_save . . . . .                                   | 95 |
| 5.34.2.11 | Krej_done . . . . .                                      | 95 |
| 5.35      | messy_mecca Module Reference . . . . .                   | 96 |
| 5.35.1    | Member Function/Subroutine Documentation . . . . .       | 96 |
| 5.35.1.1  | define_mcxp . . . . .                                    | 96 |
| 5.35.1.2  | initialize_kpp_variables . . . . .                       | 96 |
| 5.35.1.3  | mecca_read_nml_ctrl . . . . .                            | 96 |
| 5.35.1.4  | steady_state_reached . . . . .                           | 96 |
| 5.35.2    | Member Data Documentation . . . . .                      | 96 |
| 5.35.2.1  | l_aero . . . . .                                         | 96 |
| 5.35.2.2  | l_dbl . . . . .                                          | 96 |
| 5.35.2.3  | l_force_khet . . . . .                                   | 96 |
| 5.35.2.4  | l_kpp_debug . . . . .                                    | 96 |
| 5.35.2.5  | l_tag . . . . .                                          | 96 |
| 5.35.2.6  | mcxp_seed . . . . .                                      | 97 |
| 5.35.2.7  | mecca_aero . . . . .                                     | 97 |
| 5.35.2.8  | modstr . . . . .                                         | 97 |

|           |                                          |     |
|-----------|------------------------------------------|-----|
| 5.35.2.9  | modver                                   | 97  |
| 5.36      | messy_mecca_aero Module Reference        | 97  |
| 5.36.1    | Member Function/Subroutine Documentation | 97  |
| 5.36.1.1  | mecca_aero_calc_k_ex                     | 98  |
| 5.36.1.2  | mecca_aero_calc_k_ex_ocean               | 98  |
| 5.36.1.3  | mecca_aero_diag                          | 98  |
| 5.36.1.4  | mecca_aero_init_gasaq                    | 98  |
| 5.36.2    | Member Data Documentation                | 98  |
| 5.36.2.1  | alpha_T0                                 | 98  |
| 5.36.2.2  | alpha_Tdep                               | 98  |
| 5.36.2.3  | Henry_T0                                 | 98  |
| 5.36.2.4  | Henry_Tdep                               | 98  |
| 5.36.2.5  | molar_mass                               | 98  |
| 5.36.2.6  | submodstr                                | 99  |
| 5.37      | messy_mecca_box Module Reference         | 99  |
| 5.37.1    | Member Function/Subroutine Documentation | 100 |
| 5.37.1.1  | define_aerosol                           | 100 |
| 5.37.1.2  | mecca_finish                             | 100 |
| 5.37.1.3  | mecca_init                               | 100 |
| 5.37.1.4  | mecca_physc                              | 100 |
| 5.37.1.5  | mecca_result                             | 100 |
| 5.37.1.6  | x0                                       | 101 |
| 5.37.2    | Member Data Documentation                | 102 |
| 5.37.2.1  | Brm_rel                                  | 102 |
| 5.37.2.2  | c0_Brm                                   | 102 |
| 5.37.2.3  | c0_Cl <sub>m</sub>                       | 102 |
| 5.37.2.4  | c0_HCO <sub>3m</sub>                     | 102 |
| 5.37.2.5  | c0_HSO <sub>4m</sub>                     | 102 |
| 5.37.2.6  | c0_lm                                    | 102 |
| 5.37.2.7  | c0_IO <sub>3m</sub>                      | 102 |
| 5.37.2.8  | c0_Nap                                   | 102 |
| 5.37.2.9  | c0_NH <sub>4p</sub>                      | 102 |
| 5.37.2.10 | c0_NO <sub>3m</sub>                      | 102 |
| 5.37.2.11 | c0_SO <sub>4mm</sub>                     | 102 |

|                                                           |     |
|-----------------------------------------------------------|-----|
| 5.37.2.12 c_unit . . . . .                                | 102 |
| 5.37.2.13 Clm_rel . . . . .                               | 102 |
| 5.37.2.14 csalt . . . . .                                 | 102 |
| 5.37.2.15 cvfac . . . . .                                 | 102 |
| 5.37.2.16 dummy_khet_St . . . . .                         | 102 |
| 5.37.2.17 dummy_khet_Tr . . . . .                         | 102 |
| 5.37.2.18 exchnng . . . . .                               | 102 |
| 5.37.2.19 HCO3m_rel . . . . .                             | 102 |
| 5.37.2.20 lm_rel . . . . .                                | 102 |
| 5.37.2.21 IO3m_rel . . . . .                              | 102 |
| 5.37.2.22 jx . . . . .                                    | 102 |
| 5.37.2.23 k_exb . . . . .                                 | 102 |
| 5.37.2.24 k_exf . . . . .                                 | 103 |
| 5.37.2.25 k_exf_BrNO3 . . . . .                           | 103 |
| 5.37.2.26 k_exf_ClNO3 . . . . .                           | 103 |
| 5.37.2.27 k_exf_N2O5 . . . . .                            | 103 |
| 5.37.2.28 lwc . . . . .                                   | 103 |
| 5.37.2.29 mcexp . . . . .                                 | 103 |
| 5.37.2.30 NBL . . . . .                                   | 103 |
| 5.37.2.31 ncid_aero . . . . .                             | 103 |
| 5.37.2.32 ncid_spec . . . . .                             | 103 |
| 5.37.2.33 ncid_tracer . . . . .                           | 103 |
| 5.37.2.34 NO3m_rel . . . . .                              | 103 |
| 5.37.2.35 output . . . . .                                | 103 |
| 5.37.2.36 radius . . . . .                                | 103 |
| 5.37.2.37 SO4mm_rel . . . . .                             | 103 |
| 5.37.2.38 xaer . . . . .                                  | 103 |
| 5.38 messy_mecca_dbl_box Module Reference . . . . .       | 103 |
| 5.38.1 Member Function/Subroutine Documentation . . . . . | 104 |
| 5.38.1.1 mecca_dbl_emis . . . . .                         | 104 |
| 5.38.1.2 mecca_dbl_finish . . . . .                       | 104 |
| 5.38.1.3 mecca_dbl_init . . . . .                         | 104 |
| 5.38.1.4 mecca_dbl_postprocess . . . . .                  | 104 |
| 5.38.1.5 mecca_dbl_preprocess . . . . .                   | 104 |

|           |                                          |     |
|-----------|------------------------------------------|-----|
| 5.38.1.6  | mecca_dbl_result                         | 104 |
| 5.38.1.7  | mecca_dbl_x0                             | 104 |
| 5.39      | messy_mecca_khet Module Reference        | 104 |
| 5.39.1    | Member Function/Subroutine Documentation | 104 |
| 5.39.1.1  | k_mt                                     | 105 |
| 5.39.1.2  | mecca_khet_read_nml_ctrl                 | 105 |
| 5.39.2    | Member Data Documentation                | 105 |
| 5.39.2.1  | gamma_Hg                                 | 105 |
| 5.39.2.2  | gamma_HNO3                               | 105 |
| 5.39.2.3  | gamma_N2O5                               | 105 |
| 5.39.2.4  | gamma_RGM                                | 105 |
| 5.39.2.5  | l_stratosphere                           | 105 |
| 5.39.2.6  | l_troposphere                            | 105 |
| 5.39.2.7  | M_HNO3                                   | 105 |
| 5.39.2.8  | M_N2O5                                   | 105 |
| 5.39.2.9  | submodstr                                | 105 |
| 5.40      | messy_mecca_kpp Module Reference         | 105 |
| 5.40.1    | Member Function/Subroutine Documentation | 106 |
| 5.40.1.1  | error_output                             | 106 |
| 5.40.1.2  | fill_cair                                | 106 |
| 5.40.1.3  | fill_cvfac                               | 106 |
| 5.40.1.4  | fill_JX                                  | 106 |
| 5.40.1.5  | fill_k_exb                               | 106 |
| 5.40.1.6  | fill_k_exf                               | 106 |
| 5.40.1.7  | fill_k_exf_BrNO3                         | 106 |
| 5.40.1.8  | fill_k_exf_CINO3                         | 107 |
| 5.40.1.9  | fill_k_exf_N2O5                          | 107 |
| 5.40.1.10 | fill_khet_St                             | 107 |
| 5.40.1.11 | fill_khet_Tr                             | 107 |
| 5.40.1.12 | fill_lwc                                 | 107 |
| 5.40.1.13 | fill_mcexp                               | 107 |
| 5.40.1.14 | fill_press                               | 107 |
| 5.40.1.15 | fill_TEMP                                | 107 |
| 5.40.1.16 | fill_temp_elec                           | 107 |



|           |                                           |     |
|-----------|-------------------------------------------|-----|
| 5.40.1.17 | fill_temp_ion                             | 107 |
| 5.40.1.18 | fill_xaer                                 | 107 |
| 5.40.1.19 | initialize_kpp_ctrl                       | 107 |
| 5.40.1.20 | kpp_integrate                             | 108 |
| 5.40.2    | Member Data Documentation                 | 108 |
| 5.40.2.1  | icntrl                                    | 108 |
| 5.40.2.2  | l_fixed_step                              | 108 |
| 5.40.2.3  | nfsteps                                   | 108 |
| 5.40.2.4  | NKPPCTRL                                  | 108 |
| 5.40.2.5  | NMAXFIXSTEPS                              | 108 |
| 5.40.2.6  | rcntrl                                    | 108 |
| 5.40.2.7  | t_steps                                   | 108 |
| 5.41      | messy_mecca_kpp_Function Module Reference | 108 |
| 5.41.1    | Member Function/Subroutine Documentation  | 108 |
| 5.41.1.1  | Fun                                       | 108 |
| 5.41.2    | Member Data Documentation                 | 108 |
| 5.41.2.1  | A                                         | 109 |
| 5.42      | messy_mecca_kpp_Global Module Reference   | 109 |
| 5.42.1    | Member Data Documentation                 | 115 |
| 5.42.1.1  | a_ch2oh                                   | 115 |
| 5.42.1.2  | a_ch2ono2                                 | 115 |
| 5.42.1.3  | a_ch2ooh                                  | 115 |
| 5.42.1.4  | a_cho                                     | 115 |
| 5.42.1.5  | a_co2h                                    | 115 |
| 5.42.1.6  | a_coch3                                   | 115 |
| 5.42.1.7  | a_coh                                     | 116 |
| 5.42.1.8  | a_cooH                                    | 116 |
| 5.42.1.9  | a_pan                                     | 116 |
| 5.42.1.10 | alpha_NO_HO2                              | 116 |
| 5.42.1.11 | APN                                       | 116 |
| 5.42.1.12 | aqueous_eqn_file                          | 116 |
| 5.42.1.13 | aqueous_eqn_file_sum                      | 116 |
| 5.42.1.14 | aqueous_spc_file                          | 116 |
| 5.42.1.15 | aqueous_spc_file_sum                      | 116 |

|                                      |     |
|--------------------------------------|-----|
| 5.42.1.16 ATOL . . . . .             | 116 |
| 5.42.1.17 batchfile . . . . .        | 116 |
| 5.42.1.18 beta_CH3NO3 . . . . .      | 116 |
| 5.42.1.19 beta_inf_CH3NO3 . . . . .  | 116 |
| 5.42.1.20 beta_NO_HO2 . . . . .      | 116 |
| 5.42.1.21 beta_null_CH3NO3 . . . . . | 116 |
| 5.42.1.22 C . . . . .                | 116 |
| 5.42.1.23 cair . . . . .             | 116 |
| 5.42.1.24 CFACTOR . . . . .          | 116 |
| 5.42.1.25 cvfac . . . . .            | 116 |
| 5.42.1.26 diagtracfile . . . . .     | 116 |
| 5.42.1.27 DT . . . . .               | 117 |
| 5.42.1.28 f_alk . . . . .            | 117 |
| 5.42.1.29 f_allyl . . . . .          | 117 |
| 5.42.1.30 f_ch2ono2 . . . . .        | 117 |
| 5.42.1.31 f_cho . . . . .            | 117 |
| 5.42.1.32 f_co . . . . .             | 117 |
| 5.42.1.33 f_co2h . . . . .           | 117 |
| 5.42.1.34 f_cpan . . . . .           | 117 |
| 5.42.1.35 f_o . . . . .              | 117 |
| 5.42.1.36 f_ono2 . . . . .           | 117 |
| 5.42.1.37 f_pch2oh . . . . .         | 117 |
| 5.42.1.38 f_soh . . . . .            | 117 |
| 5.42.1.39 f_sooh . . . . .           | 117 |
| 5.42.1.40 f_tch2oh . . . . .         | 117 |
| 5.42.1.41 f_toh . . . . .            | 117 |
| 5.42.1.42 f_tooh . . . . .           | 117 |
| 5.42.1.43 FIX . . . . .              | 117 |
| 5.42.1.44 G7402a_yield . . . . .     | 117 |
| 5.42.1.45 gas_eqn_file . . . . .     | 117 |
| 5.42.1.46 gas_eqn_file_sum . . . . . | 117 |
| 5.42.1.47 gas_spc_file . . . . .     | 117 |
| 5.42.1.48 gas_spc_file_sum . . . . . | 118 |
| 5.42.1.49 ihs_BrNO3_H2O . . . . .    | 118 |

|           |                                                                  |     |
|-----------|------------------------------------------------------------------|-----|
| 5.42.1.50 | ih <sub>s</sub> _BrNO <sub>3</sub> _HCl                          | 118 |
| 5.42.1.51 | ih <sub>s</sub> _ClNO <sub>3</sub> _H <sub>2</sub> O             | 118 |
| 5.42.1.52 | ih <sub>s</sub> _ClNO <sub>3</sub> _HBr                          | 118 |
| 5.42.1.53 | ih <sub>s</sub> _ClNO <sub>3</sub> _HCl                          | 118 |
| 5.42.1.54 | ih <sub>s</sub> _Hg                                              | 118 |
| 5.42.1.55 | ih <sub>s</sub> _HOBr_HBr                                        | 118 |
| 5.42.1.56 | ih <sub>s</sub> _HOBr_HCl                                        | 118 |
| 5.42.1.57 | ih <sub>s</sub> _HOCl_HBr                                        | 118 |
| 5.42.1.58 | ih <sub>s</sub> _HOCl_HCl                                        | 118 |
| 5.42.1.59 | IHS_MAX                                                          | 118 |
| 5.42.1.60 | ih <sub>s</sub> _N <sub>2</sub> O <sub>5</sub> _H <sub>2</sub> O | 118 |
| 5.42.1.61 | ih <sub>s</sub> _N <sub>2</sub> O <sub>5</sub> _HCl              | 118 |
| 5.42.1.62 | ih <sub>s</sub> _RGM                                             | 118 |
| 5.42.1.63 | ih <sub>t</sub> _Hg                                              | 118 |
| 5.42.1.64 | ih <sub>t</sub> _HNO <sub>3</sub>                                | 118 |
| 5.42.1.65 | IHT_MAX                                                          | 118 |
| 5.42.1.66 | ih <sub>t</sub> _N <sub>2</sub> O <sub>5</sub>                   | 118 |
| 5.42.1.67 | ih <sub>t</sub> _RGM                                             | 118 |
| 5.42.1.68 | ind_Br <sub>2</sub> _a                                           | 118 |
| 5.42.1.69 | ind_Br <sub>2</sub> Clm_a                                        | 118 |
| 5.42.1.70 | ind_Br <sub>2</sub> m_a                                          | 118 |
| 5.42.1.71 | ind_Br_a                                                         | 119 |
| 5.42.1.72 | ind_BrCl <sub>2</sub> m_a                                        | 119 |
| 5.42.1.73 | ind_BrCl_a                                                       | 119 |
| 5.42.1.74 | ind_BrHgOBr_a                                                    | 119 |
| 5.42.1.75 | ind_Brm_a                                                        | 119 |
| 5.42.1.76 | ind_BrOHm_a                                                      | 119 |
| 5.42.1.77 | ind_BrOm_a                                                       | 119 |
| 5.42.1.78 | ind_C <sub>2</sub> H <sub>5</sub> O <sub>2</sub> _a              | 119 |
| 5.42.1.79 | ind_CH <sub>2</sub> OH <sub>2</sub> SO <sub>3</sub> m_a          | 119 |
| 5.42.1.80 | ind_CH <sub>3</sub> CHO_a                                        | 119 |
| 5.42.1.81 | ind_CH <sub>3</sub> CO <sub>2</sub> H_a                          | 119 |
| 5.42.1.82 | ind_CH <sub>3</sub> COCH <sub>3</sub> _a                         | 119 |
| 5.42.1.83 | ind_CH <sub>3</sub> COOm_a                                       | 119 |

|                                   |     |
|-----------------------------------|-----|
| 5.42.1.84 ind_CH3O2_a . . . . .   | 119 |
| 5.42.1.85 ind_CH3OH_a . . . . .   | 119 |
| 5.42.1.86 ind_CH3OOH_a . . . . .  | 119 |
| 5.42.1.87 ind_CH3SO3m_a . . . . . | 119 |
| 5.42.1.88 ind_Cl2_a . . . . .     | 120 |
| 5.42.1.89 ind_Cl2m_a . . . . .    | 120 |
| 5.42.1.90 ind_Cl_a . . . . .      | 120 |
| 5.42.1.91 ind_ClHgBr_a . . . . .  | 120 |
| 5.42.1.92 ind_ClHgOBr_a . . . . . | 120 |
| 5.42.1.93 ind_Clm_a . . . . .     | 120 |
| 5.42.1.94 ind_ClOHm_a . . . . .   | 120 |
| 5.42.1.95 ind_ClOm_a . . . . .    | 120 |
| 5.42.1.96 ind_CO2_a . . . . .     | 120 |
| 5.42.1.97 ind_CO3m_a . . . . .    | 120 |
| 5.42.1.98 ind_D1O_a . . . . .     | 120 |
| 5.42.1.99 ind_D2O_a . . . . .     | 120 |
| 5.42.1.100nd_DA_a . . . . .       | 120 |
| 5.42.1.101nd_DAHp_a . . . . .     | 120 |
| 5.42.1.102nd_DAm_a . . . . .      | 120 |
| 5.42.1.103nd_DGtAi_a . . . . .    | 120 |
| 5.42.1.104nd_DGtAs_a . . . . .    | 120 |
| 5.42.1.105nd_DMS_a . . . . .      | 120 |
| 5.42.1.106nd_DMSO_a . . . . .     | 120 |
| 5.42.1.107nd_H2O2_a . . . . .     | 121 |
| 5.42.1.108nd_H2O_a . . . . .      | 121 |
| 5.42.1.109nd_H2SO4_a . . . . .    | 121 |
| 5.42.1.110nd_HBr_a . . . . .      | 121 |
| 5.42.1.111ind_HCHO_a . . . . .    | 121 |
| 5.42.1.112nd_HCl_a . . . . .      | 121 |
| 5.42.1.113nd_HCO3m_a . . . . .    | 121 |
| 5.42.1.114nd_HCOOH_a . . . . .    | 121 |
| 5.42.1.115nd_HCOOm_a . . . . .    | 121 |
| 5.42.1.116nd_Hg_a . . . . .       | 121 |
| 5.42.1.117nd_HgBr2_a . . . . .    | 121 |

|                                   |     |
|-----------------------------------|-----|
| 5.42.1.118nd_HgBr3m_a . . . . .   | 121 |
| 5.42.1.119nd_HgBr4mm_a . . . . .  | 121 |
| 5.42.1.120nd_HgBrp_a . . . . .    | 121 |
| 5.42.1.121ind_HgCl2_a . . . . .   | 121 |
| 5.42.1.122nd_HgCl3m_a . . . . .   | 121 |
| 5.42.1.123nd_HgCl4mm_a . . . . .  | 121 |
| 5.42.1.124nd_HgClp_a . . . . .    | 122 |
| 5.42.1.125nd_HgO_a . . . . .      | 122 |
| 5.42.1.126nd_HgOH_a . . . . .     | 122 |
| 5.42.1.127nd_HgOHCl_a . . . . .   | 122 |
| 5.42.1.128nd_HgOHOH_a . . . . .   | 122 |
| 5.42.1.129nd_HgOHp_a . . . . .    | 122 |
| 5.42.1.130nd_Hgp_a . . . . .      | 122 |
| 5.42.1.131ind_Hgpp_a . . . . .    | 122 |
| 5.42.1.132nd_HgSO32mm_a . . . . . | 122 |
| 5.42.1.133nd_HgSO3_a . . . . .    | 122 |
| 5.42.1.134nd_HI_a . . . . .       | 122 |
| 5.42.1.135nd_HIO3_a . . . . .     | 122 |
| 5.42.1.136nd_HNO3_a . . . . .     | 122 |
| 5.42.1.137nd_HNO4_a . . . . .     | 122 |
| 5.42.1.138nd_HO2_a . . . . .      | 122 |
| 5.42.1.139nd_HOBr_a . . . . .     | 122 |
| 5.42.1.140nd_HOCl_a . . . . .     | 122 |
| 5.42.1.141ind_HOI_a . . . . .     | 122 |
| 5.42.1.142nd_HONO_a . . . . .     | 123 |
| 5.42.1.143nd_Hp_a . . . . .       | 123 |
| 5.42.1.144nd_HSO3m_a . . . . .    | 123 |
| 5.42.1.145nd_HSO4m_a . . . . .    | 123 |
| 5.42.1.146nd_HSO5m_a . . . . .    | 123 |
| 5.42.1.147nd_I2_a . . . . .       | 123 |
| 5.42.1.148nd_IBr2m_a . . . . .    | 123 |
| 5.42.1.149nd_IBr_a . . . . .      | 123 |
| 5.42.1.150nd_ICl2m_a . . . . .    | 123 |
| 5.42.1.151ind_ICl_a . . . . .     | 123 |

|                                 |     |
|---------------------------------|-----|
| 5.42.1.152nd_IClBrm_a . . . . . | 123 |
| 5.42.1.153nd_Im_a . . . . .     | 123 |
| 5.42.1.154nd_IO2m_a . . . . .   | 123 |
| 5.42.1.155nd_IO3m_a . . . . .   | 123 |
| 5.42.1.156nd_IO_a . . . . .     | 123 |
| 5.42.1.157nd_N2O5_a . . . . .   | 123 |
| 5.42.1.158nd_Nap_a . . . . .    | 123 |
| 5.42.1.159nd_NH3_a . . . . .    | 123 |
| 5.42.1.160nd_NH4p_a . . . . .   | 123 |
| 5.42.1.161nd_NO2_a . . . . .    | 124 |
| 5.42.1.162nd_NO2m_a . . . . .   | 124 |
| 5.42.1.163nd_NO3_a . . . . .    | 124 |
| 5.42.1.164nd_NO3m_a . . . . .   | 124 |
| 5.42.1.165nd_NO4m_a . . . . .   | 124 |
| 5.42.1.166nd_NO_a . . . . .     | 124 |
| 5.42.1.167nd_O2_a . . . . .     | 124 |
| 5.42.1.168nd_O2m_a . . . . .    | 124 |
| 5.42.1.169nd_O3_a . . . . .     | 124 |
| 5.42.1.170nd_OH_a . . . . .     | 124 |
| 5.42.1.171nd_OHm_a . . . . .    | 124 |
| 5.42.1.172nd_PAN_a . . . . .    | 124 |
| 5.42.1.173nd_PROD1_a . . . . .  | 124 |
| 5.42.1.174nd_PROD2_a . . . . .  | 124 |
| 5.42.1.175nd_SO2_a . . . . .    | 124 |
| 5.42.1.176nd_SO3m_a . . . . .   | 124 |
| 5.42.1.177nd_SO3mm_a . . . . .  | 124 |
| 5.42.1.178nd_SO4m_a . . . . .   | 124 |
| 5.42.1.179nd_SO4mm_a . . . . .  | 124 |
| 5.42.1.180nd_SO5m_a . . . . .   | 125 |
| 5.42.1.181integr . . . . .      | 125 |
| 5.42.1.182J_ACETOL . . . . .    | 125 |
| 5.42.1.183J_IC3H7NO3 . . . . .  | 125 |
| 5.42.1.184x . . . . .           | 125 |
| 5.42.1.185k0_NO_HO2 . . . . .   | 125 |

|                                  |     |
|----------------------------------|-----|
| 5.42.1.186k1d_NO_HO2 . . . . .   | 125 |
| 5.42.1.187k1w_NO_HO2 . . . . .   | 125 |
| 5.42.1.188k2d_NO_HO2 . . . . .   | 125 |
| 5.42.1.189k2w_NO_HO2 . . . . .   | 125 |
| 5.42.1.190k_adp . . . . .        | 125 |
| 5.42.1.191k_ads . . . . .        | 125 |
| 5.42.1.192k_adsecprim . . . . .  | 125 |
| 5.42.1.193k_adt . . . . .        | 125 |
| 5.42.1.194k_adtertprim . . . . . | 125 |
| 5.42.1.195k_BrO_NO2 . . . . .    | 125 |
| 5.42.1.196k_CH3CO3_NO2 . . . . . | 125 |
| 5.42.1.197k_CH3O2 . . . . .      | 125 |
| 5.42.1.198k_CH3OOH_OH . . . . .  | 125 |
| 5.42.1.199k_CIO_CIO . . . . .    | 125 |
| 5.42.1.200k_DMS_OH . . . . .     | 125 |
| 5.42.1.201k_exb . . . . .        | 125 |
| 5.42.1.202k_exf . . . . .        | 126 |
| 5.42.1.203k_exf_BrNO3 . . . . .  | 126 |
| 5.42.1.204k_exf_CINO3 . . . . .  | 126 |
| 5.42.1.205k_exf_N2O5 . . . . .   | 126 |
| 5.42.1.206k_G4138 . . . . .      | 126 |
| 5.42.1.207k_G9408 . . . . .      | 126 |
| 5.42.1.208k_HNO3_OH . . . . .    | 126 |
| 5.42.1.209k_HO2_HO2 . . . . .    | 126 |
| 5.42.1.210k_I_NO2 . . . . .      | 126 |
| 5.42.1.211k_NO2_CH3O2 . . . . .  | 126 |
| 5.42.1.212k_NO2_HO2 . . . . .    | 126 |
| 5.42.1.213k_NO3_NO2 . . . . .    | 126 |
| 5.42.1.214k_O3s . . . . .        | 126 |
| 5.42.1.215k_p . . . . .          | 126 |
| 5.42.1.216k_PAN_M . . . . .      | 126 |
| 5.42.1.217k_Pro2_CH3O2 . . . . . | 126 |
| 5.42.1.218k_Pro2_HO2 . . . . .   | 126 |
| 5.42.1.219k_Pro2_NO . . . . .    | 126 |

|                                        |     |
|----------------------------------------|-----|
| 5.42.1.220k_rohro . . . . .            | 126 |
| 5.42.1.221k_s . . . . .                | 126 |
| 5.42.1.222k_t . . . . .                | 126 |
| 5.42.1.223KAPHO2 . . . . .             | 126 |
| 5.42.1.224KAPNO . . . . .              | 126 |
| 5.42.1.225khet_St . . . . .            | 126 |
| 5.42.1.226khet_Tr . . . . .            | 127 |
| 5.42.1.227KNO3AL . . . . .             | 127 |
| 5.42.1.228KPP_HOME . . . . .           | 127 |
| 5.42.1.229KPP_version . . . . .        | 127 |
| 5.42.1.230kppoption . . . . .          | 127 |
| 5.42.1.231KRO2HO2 . . . . .            | 127 |
| 5.42.1.232KRO2NO . . . . .             | 127 |
| 5.42.1.233KRO2NO3 . . . . .            | 127 |
| 5.42.1.234wc . . . . .                 | 127 |
| 5.42.1.235MAX_MCEXP . . . . .          | 127 |
| 5.42.1.236mcexp . . . . .              | 127 |
| 5.42.1.237mecca_eqn_file . . . . .     | 127 |
| 5.42.1.238mecca_eqn_file_sum . . . . . | 127 |
| 5.42.1.239mecca_spc_file . . . . .     | 127 |
| 5.42.1.240mecca_spc_file_sum . . . . . | 127 |
| 5.42.1.241press . . . . .              | 127 |
| 5.42.1.242RCO3_O3 . . . . .            | 127 |
| 5.42.1.243RCO3_OH . . . . .            | 127 |
| 5.42.1.244RCO3_OOH . . . . .           | 127 |
| 5.42.1.245RCONST . . . . .             | 127 |
| 5.42.1.246REQ_AEROSOL . . . . .        | 128 |
| 5.42.1.247REQ_HET . . . . .            | 128 |
| 5.42.1.248REQ_MCFCT . . . . .          | 128 |
| 5.42.1.249REQ_PHOTRAT . . . . .        | 128 |
| 5.42.1.250RO2 . . . . .                | 128 |
| 5.42.1.251rplfile . . . . .            | 128 |
| 5.42.1.252RTOL . . . . .               | 128 |
| 5.42.1.253xnrates . . . . .            | 128 |



|                                   |     |
|-----------------------------------|-----|
| 5.42.1.254STEPMAX . . . . .       | 128 |
| 5.42.1.255STEPMIN . . . . .       | 128 |
| 5.42.1.256SUN . . . . .           | 128 |
| 5.42.1.257tagdbl . . . . .        | 128 |
| 5.42.1.258TEMP . . . . .          | 128 |
| 5.42.1.259temp_elec . . . . .     | 128 |
| 5.42.1.260temp_ion . . . . .      | 128 |
| 5.42.1.261TEND . . . . .          | 128 |
| 5.42.1.262testfac_CO2 . . . . .   | 128 |
| 5.42.1.263testfac_H2O . . . . .   | 128 |
| 5.42.1.264testfac_H2SO4 . . . . . | 128 |
| 5.42.1.265testfac_HBr . . . . .   | 128 |
| 5.42.1.266testfac_HCl . . . . .   | 128 |
| 5.42.1.267testfac_HCOOH . . . . . | 128 |
| 5.42.1.268testfac_HNO3 . . . . .  | 129 |
| 5.42.1.269testfac_HNO4 . . . . .  | 129 |
| 5.42.1.270testfac_HO2 . . . . .   | 129 |
| 5.42.1.271testfac_HOBr . . . . .  | 129 |
| 5.42.1.272testfac_HOCl . . . . .  | 129 |
| 5.42.1.273testfac_HONO . . . . .  | 129 |
| 5.42.1.274testfac_HSO3m . . . . . | 129 |
| 5.42.1.275testfac_HSO4m . . . . . | 129 |
| 5.42.1.276testfac_IBr . . . . .   | 129 |
| 5.42.1.277testfac_ICl . . . . .   | 129 |
| 5.42.1.278testfac_IClBr . . . . . | 129 |
| 5.42.1.279testfac_NH3 . . . . .   | 129 |
| 5.42.1.280testfac_SO2 . . . . .   | 129 |
| 5.42.1.281TIME . . . . .          | 129 |
| 5.42.1.282timestamp . . . . .     | 129 |
| 5.42.1.283TSTART . . . . .        | 129 |
| 5.42.1.284VAR . . . . .           | 129 |
| 5.42.1.285wanted . . . . .        | 129 |
| 5.42.1.286xaer . . . . .          | 129 |
| 5.42.1.287xnom7sulf . . . . .     | 129 |

|           |                                             |     |
|-----------|---------------------------------------------|-----|
| 5.43      | messy_mecca_kpp_Initialize Module Reference | 130 |
| 5.43.1    | Member Function/Subroutine Documentation    | 130 |
| 5.43.1.1  | Initialize                                  | 130 |
| 5.44      | messy_mecca_kpp_Integrator Module Reference | 130 |
| 5.44.1    | Member Function/Subroutine Documentation    | 131 |
| 5.44.1.1  | FunTemplate                                 | 131 |
| 5.44.1.2  | INTEGRATE                                   | 131 |
| 5.44.1.3  | JacTemplate                                 | 131 |
| 5.44.1.4  | Rosenbrock                                  | 131 |
| 5.44.2    | Member Data Documentation                   | 131 |
| 5.44.2.1  | IERR_NAMES                                  | 132 |
| 5.44.2.2  | Nacc                                        | 132 |
| 5.44.2.3  | Ndec                                        | 132 |
| 5.44.2.4  | Nfun                                        | 132 |
| 5.44.2.5  | Nhexit                                      | 132 |
| 5.44.2.6  | Nhnew                                       | 132 |
| 5.44.2.7  | Njac                                        | 132 |
| 5.44.2.8  | Nrej                                        | 132 |
| 5.44.2.9  | Nsng                                        | 132 |
| 5.44.2.10 | Nsol                                        | 132 |
| 5.44.2.11 | Nstp                                        | 132 |
| 5.44.2.12 | Ntextit                                     | 132 |
| 5.45      | messy_mecca_kpp_Jacobian Module Reference   | 132 |
| 5.45.1    | Member Function/Subroutine Documentation    | 132 |
| 5.45.1.1  | Jac_SP                                      | 133 |
| 5.45.1.2  | Jac_SP_Vec                                  | 133 |
| 5.45.1.3  | JacTR_SP_Vec                                | 133 |
| 5.46      | messy_mecca_kpp_JacobianSP Module Reference | 133 |
| 5.46.1    | Member Data Documentation                   | 134 |
| 5.46.1.1  | LU_CROW                                     | 134 |
| 5.46.1.2  | LU_DIAG                                     | 134 |
| 5.46.1.3  | LU_ICOL                                     | 134 |
| 5.46.1.4  | LU_ICOL_0                                   | 135 |
| 5.46.1.5  | LU_ICOL_1                                   | 135 |

|           |                                                |     |
|-----------|------------------------------------------------|-----|
| 5.46.1.6  | LU_IROW                                        | 135 |
| 5.46.1.7  | LU_IROW_0                                      | 135 |
| 5.46.1.8  | LU_IROW_1                                      | 135 |
| 5.47      | messy_mecca_kpp_LinearAlgebra Module Reference | 136 |
| 5.47.1    | Member Function/Subroutine Documentation       | 136 |
| 5.47.1.1  | KppDecomp                                      | 136 |
| 5.47.1.2  | KppDecompCmplx                                 | 136 |
| 5.47.1.3  | KppDecompCmplxR                                | 136 |
| 5.47.1.4  | KppSolve                                       | 136 |
| 5.47.1.5  | KppSolveCmplx                                  | 137 |
| 5.47.1.6  | KppSolveCmplxR                                 | 137 |
| 5.47.1.7  | KppSolveIndirect                               | 137 |
| 5.47.1.8  | KppSolveTR                                     | 137 |
| 5.47.1.9  | KppSolveTRCmplx                                | 137 |
| 5.47.1.10 | KppSolveTRCmplxR                               | 137 |
| 5.47.1.11 | KppSolveTRIndirect                             | 137 |
| 5.47.1.12 | SET2ZERO                                       | 137 |
| 5.47.1.13 | WADD                                           | 137 |
| 5.47.1.14 | WXPY                                           | 137 |
| 5.47.1.15 | WCOPY                                          | 137 |
| 5.47.1.16 | WDOT                                           | 137 |
| 5.47.1.17 | WGEFA                                          | 137 |
| 5.47.1.18 | WGESL                                          | 138 |
| 5.47.1.19 | WLAMCH                                         | 138 |
| 5.47.1.20 | WLAMCH_ADD                                     | 138 |
| 5.47.1.21 | WSCAL                                          | 138 |
| 5.48      | messy_mecca_kpp_Monitor Module Reference       | 138 |
| 5.48.1    | Member Data Documentation                      | 140 |
| 5.48.1.1  | EQN_NAMES                                      | 140 |
| 5.48.1.2  | EQN_NAMES_0                                    | 140 |
| 5.48.1.3  | EQN_NAMES_1                                    | 141 |
| 5.48.1.4  | EQN_NAMES_2                                    | 141 |
| 5.48.1.5  | EQN_NAMES_3                                    | 141 |
| 5.48.1.6  | EQN_NAMES_4                                    | 141 |

|           |                                             |     |
|-----------|---------------------------------------------|-----|
| 5.48.1.7  | EQN_TAGS                                    | 142 |
| 5.48.1.8  | EQN_TAGS_0                                  | 142 |
| 5.48.1.9  | EQN_TAGS_1                                  | 142 |
| 5.48.1.10 | LOOKAT                                      | 142 |
| 5.48.1.11 | MONITOR                                     | 142 |
| 5.48.1.12 | SMASS                                       | 142 |
| 5.48.1.13 | SPC_NAMES                                   | 142 |
| 5.49      | messy_mecca_kpp_Parameters Module Reference | 142 |
| 5.49.1    | Member Data Documentation                   | 154 |
| 5.49.1.1  | CNVAR                                       | 154 |
| 5.49.1.2  | ind_ACETOL                                  | 154 |
| 5.49.1.3  | ind_ALCOCH2OOH                              | 154 |
| 5.49.1.4  | ind_APINAOO                                 | 154 |
| 5.49.1.5  | ind_APINBOO                                 | 154 |
| 5.49.1.6  | ind_APINENE                                 | 154 |
| 5.49.1.7  | ind_BIACET                                  | 154 |
| 5.49.1.8  | ind_BIACETO2                                | 154 |
| 5.49.1.9  | ind_BIACETOH                                | 155 |
| 5.49.1.10 | ind_BIACETOOH                               | 155 |
| 5.49.1.11 | ind_BPINANO3                                | 155 |
| 5.49.1.12 | ind_BPINAO2                                 | 155 |
| 5.49.1.13 | ind_BPINAOOH                                | 155 |
| 5.49.1.14 | ind_BPINENE                                 | 155 |
| 5.49.1.15 | ind_Br                                      | 155 |
| 5.49.1.16 | ind_Br2                                     | 155 |
| 5.49.1.17 | ind_Br2_a01                                 | 155 |
| 5.49.1.18 | ind_Br2Clm_a01                              | 155 |
| 5.49.1.19 | ind_Br2m_a01                                | 155 |
| 5.49.1.20 | ind_Br_a01                                  | 155 |
| 5.49.1.21 | ind_BrCl                                    | 155 |
| 5.49.1.22 | ind_BrCl2m_a01                              | 155 |
| 5.49.1.23 | ind_BrCl_a01                                | 155 |
| 5.49.1.24 | ind_BrHgOBr                                 | 155 |
| 5.49.1.25 | ind_BrHgOBr_a01                             | 155 |

|                                    |     |
|------------------------------------|-----|
| 5.49.1.26 ind_Brm_a01 . . . . .    | 155 |
| 5.49.1.27 ind_BrNO2 . . . . .      | 155 |
| 5.49.1.28 ind_BrNO3 . . . . .      | 155 |
| 5.49.1.29 ind_BrO . . . . .        | 155 |
| 5.49.1.30 ind_BrOHm_a01 . . . . .  | 155 |
| 5.49.1.31 ind_BrOm_a01 . . . . .   | 155 |
| 5.49.1.32 ind_C106NO3 . . . . .    | 156 |
| 5.49.1.33 ind_C106O2 . . . . .     | 156 |
| 5.49.1.34 ind_C106OOH . . . . .    | 156 |
| 5.49.1.35 ind_C109CO . . . . .     | 156 |
| 5.49.1.36 ind_C109O2 . . . . .     | 156 |
| 5.49.1.37 ind_C109OOH . . . . .    | 156 |
| 5.49.1.38 ind_C10PAN2 . . . . .    | 156 |
| 5.49.1.39 ind_C235C6CO3H . . . . . | 156 |
| 5.49.1.40 ind_C2H2 . . . . .       | 156 |
| 5.49.1.41 ind_C2H4 . . . . .       | 156 |
| 5.49.1.42 ind_C2H5O2 . . . . .     | 156 |
| 5.49.1.43 ind_C2H5O2_a01 . . . . . | 156 |
| 5.49.1.44 ind_C2H5OOH . . . . .    | 156 |
| 5.49.1.45 ind_C2H6 . . . . .       | 156 |
| 5.49.1.46 ind_C312COCO3 . . . . .  | 156 |
| 5.49.1.47 ind_C312COCO3H . . . . . | 156 |
| 5.49.1.48 ind_C312COPAN . . . . .  | 156 |
| 5.49.1.49 ind_C33CO . . . . .      | 156 |
| 5.49.1.50 ind_C3H6 . . . . .       | 156 |
| 5.49.1.51 ind_C3H7I . . . . .      | 156 |
| 5.49.1.52 ind_C3H8 . . . . .       | 156 |
| 5.49.1.53 ind_C3PAN1 . . . . .     | 156 |
| 5.49.1.54 ind_C3PAN2 . . . . .     | 156 |
| 5.49.1.55 ind_C413COOOH . . . . .  | 157 |
| 5.49.1.56 ind_C44O2 . . . . .      | 157 |
| 5.49.1.57 ind_C44OOH . . . . .     | 157 |
| 5.49.1.58 ind_C4CODIAL . . . . .   | 157 |
| 5.49.1.59 ind_C511O2 . . . . .     | 157 |

|                                  |     |
|----------------------------------|-----|
| 5.49.1.60 ind_C511OOH . . . . .  | 157 |
| 5.49.1.61 ind_C512O2 . . . . .   | 157 |
| 5.49.1.62 ind_C512OOH . . . . .  | 157 |
| 5.49.1.63 ind_C513CO . . . . .   | 157 |
| 5.49.1.64 ind_C513O2 . . . . .   | 157 |
| 5.49.1.65 ind_C513OOH . . . . .  | 157 |
| 5.49.1.66 ind_C514NO3 . . . . .  | 157 |
| 5.49.1.67 ind_C514O2 . . . . .   | 157 |
| 5.49.1.68 ind_C514OOH . . . . .  | 157 |
| 5.49.1.69 ind_C59O2 . . . . .    | 157 |
| 5.49.1.70 ind_C59OOH . . . . .   | 157 |
| 5.49.1.71 ind_C5H8 . . . . .     | 157 |
| 5.49.1.72 ind_C5PAN9 . . . . .   | 157 |
| 5.49.1.73 ind_C614CO . . . . .   | 157 |
| 5.49.1.74 ind_C614NO3 . . . . .  | 157 |
| 5.49.1.75 ind_C614O2 . . . . .   | 157 |
| 5.49.1.76 ind_C614OOH . . . . .  | 157 |
| 5.49.1.77 ind_C716O2 . . . . .   | 157 |
| 5.49.1.78 ind_C716OOH . . . . .  | 157 |
| 5.49.1.79 ind_C721CHO . . . . .  | 158 |
| 5.49.1.80 ind_C721CO3 . . . . .  | 158 |
| 5.49.1.81 ind_C721CO3H . . . . . | 158 |
| 5.49.1.82 ind_C721O2 . . . . .   | 158 |
| 5.49.1.83 ind_C721OOH . . . . .  | 158 |
| 5.49.1.84 ind_C721PAN . . . . .  | 158 |
| 5.49.1.85 ind_C722O2 . . . . .   | 158 |
| 5.49.1.86 ind_C722OOH . . . . .  | 158 |
| 5.49.1.87 ind_C7PAN3 . . . . .   | 158 |
| 5.49.1.88 ind_C810NO3 . . . . .  | 158 |
| 5.49.1.89 ind_C810O2 . . . . .   | 158 |
| 5.49.1.90 ind_C810OOH . . . . .  | 158 |
| 5.49.1.91 ind_C811CO3 . . . . .  | 158 |
| 5.49.1.92 ind_C811CO3H . . . . . | 158 |
| 5.49.1.93 ind_C811O2 . . . . .   | 158 |

|                                 |     |
|---------------------------------|-----|
| 5.49.1.94 ind_C811OOH . . . . . | 158 |
| 5.49.1.95 ind_C811PAN . . . . . | 158 |
| 5.49.1.96 ind_C812O2 . . . . .  | 158 |
| 5.49.1.97 ind_C812OOH . . . . . | 158 |
| 5.49.1.98 ind_C813O2 . . . . .  | 158 |
| 5.49.1.99 ind_C813OOH . . . . . | 158 |
| 5.49.1.100nd_C85CO3 . . . . .   | 158 |
| 5.49.1.101ind_C85CO3H . . . . . | 158 |
| 5.49.1.102nd_C85O2 . . . . .    | 158 |
| 5.49.1.103nd_C85OOH . . . . .   | 159 |
| 5.49.1.104nd_C86O2 . . . . .    | 159 |
| 5.49.1.105nd_C86OOH . . . . .   | 159 |
| 5.49.1.106nd_C89CO2H . . . . .  | 159 |
| 5.49.1.107nd_C89CO3 . . . . .   | 159 |
| 5.49.1.108nd_C89CO3H . . . . .  | 159 |
| 5.49.1.109nd_C89NO3 . . . . .   | 159 |
| 5.49.1.110nd_C89O2 . . . . .    | 159 |
| 5.49.1.111ind_C89OOH . . . . .  | 159 |
| 5.49.1.112nd_C89PAN . . . . .   | 159 |
| 5.49.1.113nd_C8BC . . . . .     | 159 |
| 5.49.1.114nd_C8BCCO . . . . .   | 159 |
| 5.49.1.115nd_C8BCNO3 . . . . .  | 159 |
| 5.49.1.116nd_C8BCO2 . . . . .   | 159 |
| 5.49.1.117nd_C8BCOOH . . . . .  | 159 |
| 5.49.1.118nd_C96CO3 . . . . .   | 159 |
| 5.49.1.119nd_C96NO3 . . . . .   | 159 |
| 5.49.1.120nd_C96O2 . . . . .    | 159 |
| 5.49.1.121ind_C96OOH . . . . .  | 159 |
| 5.49.1.122nd_C97O2 . . . . .    | 159 |
| 5.49.1.123nd_C97OOH . . . . .   | 159 |
| 5.49.1.124nd_C98NO3 . . . . .   | 159 |
| 5.49.1.125nd_C98O2 . . . . .    | 159 |
| 5.49.1.126nd_C98OOH . . . . .   | 159 |
| 5.49.1.127nd_C9PAN2 . . . . .   | 160 |

|                                       |     |
|---------------------------------------|-----|
| 5.49.1.128nd_CCl4 . . . . .           | 160 |
| 5.49.1.129nd_CF2Cl2 . . . . .         | 160 |
| 5.49.1.130nd_CF2Cl2_c . . . . .       | 160 |
| 5.49.1.131ind_CF2ClBr . . . . .       | 160 |
| 5.49.1.132nd_CF2ClBr_c . . . . .      | 160 |
| 5.49.1.133nd_CF3Br . . . . .          | 160 |
| 5.49.1.134nd_CF3Br_c . . . . .        | 160 |
| 5.49.1.135nd_CFCI3 . . . . .          | 160 |
| 5.49.1.136nd_CFCI3_c . . . . .        | 160 |
| 5.49.1.137nd_CH2Br2 . . . . .         | 160 |
| 5.49.1.138nd_CH2ClBr . . . . .        | 160 |
| 5.49.1.139nd_CH2Cl . . . . .          | 160 |
| 5.49.1.140nd_CH2I2 . . . . .          | 160 |
| 5.49.1.141ind_CH2OHSO3m_a01 . . . . . | 160 |
| 5.49.1.142nd_CH2OO . . . . .          | 160 |
| 5.49.1.143nd_CH3 . . . . .            | 160 |
| 5.49.1.144nd_CH3Br . . . . .          | 160 |
| 5.49.1.145nd_CH3CCI3 . . . . .        | 160 |
| 5.49.1.146nd_CH3CCI3_c . . . . .      | 160 |
| 5.49.1.147nd_CH3CHO . . . . .         | 160 |
| 5.49.1.148nd_CH3CHO_a01 . . . . .     | 160 |
| 5.49.1.149nd_CH3Cl . . . . .          | 160 |
| 5.49.1.150nd_CH3CO2H . . . . .        | 161 |
| 5.49.1.151ind_CH3CO2H_a01 . . . . .   | 161 |
| 5.49.1.152nd_CH3CO3 . . . . .         | 161 |
| 5.49.1.153nd_CH3CO3H . . . . .        | 161 |
| 5.49.1.154nd_CH3COCH2O2 . . . . .     | 161 |
| 5.49.1.155nd_CH3COCH3 . . . . .       | 161 |
| 5.49.1.156nd_CH3COCH3_a01 . . . . .   | 161 |
| 5.49.1.157nd_CH3COOm_a01 . . . . .    | 161 |
| 5.49.1.158nd_CH3I . . . . .           | 161 |
| 5.49.1.159nd_CH3NO3 . . . . .         | 161 |
| 5.49.1.160nd_CH3O . . . . .           | 161 |
| 5.49.1.161ind_CH3O2 . . . . .         | 161 |



|                                    |     |
|------------------------------------|-----|
| 5.49.1.162nd_CH3O2_a01 . . . . .   | 161 |
| 5.49.1.163nd_CH3O2NO2 . . . . .    | 161 |
| 5.49.1.164nd_CH3OH . . . . .       | 161 |
| 5.49.1.165nd_CH3OH_a01 . . . . .   | 161 |
| 5.49.1.166nd_CH3ONO . . . . .      | 161 |
| 5.49.1.167nd_CH3OOH . . . . .      | 161 |
| 5.49.1.168nd_CH3OOH_a01 . . . . .  | 161 |
| 5.49.1.169nd_CH3SO2 . . . . .      | 161 |
| 5.49.1.170nd_CH3SO3 . . . . .      | 161 |
| 5.49.1.171ind_CH3SO3H . . . . .    | 162 |
| 5.49.1.172nd_CH3SO3m_a01 . . . . . | 162 |
| 5.49.1.173nd_CH4 . . . . .         | 162 |
| 5.49.1.174nd_CHBr3 . . . . .       | 162 |
| 5.49.1.175nd_CHCl2Br . . . . .     | 162 |
| 5.49.1.176nd_CHClBr2 . . . . .     | 162 |
| 5.49.1.177nd_CHOC3COCO3 . . . . .  | 162 |
| 5.49.1.178nd_CHOC3COO2 . . . . .   | 162 |
| 5.49.1.179nd_CHOC3COOOH . . . . .  | 162 |
| 5.49.1.180nd_CHOC3COPAN . . . . .  | 162 |
| 5.49.1.181ind_CHOCOCH2O2 . . . . . | 162 |
| 5.49.1.182nd_CHOOCHO . . . . .     | 162 |
| 5.49.1.183nd_Cl . . . . .          | 162 |
| 5.49.1.184nd_Cl2 . . . . .         | 162 |
| 5.49.1.185nd_Cl2_a01 . . . . .     | 162 |
| 5.49.1.186nd_Cl2m_a01 . . . . .    | 162 |
| 5.49.1.187nd_Cl2O2 . . . . .       | 162 |
| 5.49.1.188nd_Cl_a01 . . . . .      | 162 |
| 5.49.1.189nd_ClHgBr . . . . .      | 162 |
| 5.49.1.190nd_ClHgBr_a01 . . . . .  | 162 |
| 5.49.1.191ind_ClHgOBr . . . . .    | 162 |
| 5.49.1.192nd_ClHgOBr_a01 . . . . . | 163 |
| 5.49.1.193nd_Cl_m_a01 . . . . .    | 163 |
| 5.49.1.194nd_CINO2 . . . . .       | 163 |
| 5.49.1.195nd_CINO3 . . . . .       | 163 |

|                         |     |
|-------------------------|-----|
| 5.49.1.196nd_CIO        | 163 |
| 5.49.1.197nd_CIOHm_a01  | 163 |
| 5.49.1.198nd_CIOm_a01   | 163 |
| 5.49.1.199nd_CO         | 163 |
| 5.49.1.200nd_CO13C4CHO  | 163 |
| 5.49.1.201nd_CO2        | 163 |
| 5.49.1.202nd_CO235C5CHO | 163 |
| 5.49.1.203nd_CO235C6CHO | 163 |
| 5.49.1.204nd_CO235C6CO3 | 163 |
| 5.49.1.205nd_CO235C6O2  | 163 |
| 5.49.1.206nd_CO235C6OOH | 163 |
| 5.49.1.207nd_CO23C3CHO  | 163 |
| 5.49.1.208nd_CO23C4CHO  | 163 |
| 5.49.1.209nd_CO23C4CO3  | 163 |
| 5.49.1.210nd_CO23C4CO3H | 163 |
| 5.49.1.211nd_CO2_a01    | 163 |
| 5.49.1.212nd_CO2H3CHO   | 164 |
| 5.49.1.213nd_CO2H3CO3   | 164 |
| 5.49.1.214nd_CO2H3CO3H  | 164 |
| 5.49.1.215nd_CO3m_a01   | 164 |
| 5.49.1.216nd_D1O_a01    | 164 |
| 5.49.1.217nd_D2O_a01    | 164 |
| 5.49.1.218nd_DA_a01     | 164 |
| 5.49.1.219nd_DAHp_a01   | 164 |
| 5.49.1.220nd_DAm_a01    | 164 |
| 5.49.1.221nd_DGtAi_a01  | 164 |
| 5.49.1.222nd_DGtAs_a01  | 164 |
| 5.49.1.223nd_DMS        | 164 |
| 5.49.1.224nd_DMS_a01    | 164 |
| 5.49.1.225nd_DMSO       | 164 |
| 5.49.1.226nd_DMSO_a01   | 164 |
| 5.49.1.227nd_Dummy      | 164 |
| 5.49.1.228nd_em         | 164 |
| 5.49.1.229nd_ETHGLY     | 164 |

|                                   |     |
|-----------------------------------|-----|
| 5.49.1.230nd_ETHOHNO3 . . . . .   | 164 |
| 5.49.1.231ind_GLYOX . . . . .     | 164 |
| 5.49.1.232nd_H . . . . .          | 164 |
| 5.49.1.233nd_H2 . . . . .         | 164 |
| 5.49.1.234nd_H2O . . . . .        | 164 |
| 5.49.1.235nd_H2O2 . . . . .       | 165 |
| 5.49.1.236nd_H2O2_a01 . . . . .   | 165 |
| 5.49.1.237nd_H2O_a01 . . . . .    | 165 |
| 5.49.1.238nd_H2OH2O . . . . .     | 165 |
| 5.49.1.239nd_H2SO4 . . . . .      | 165 |
| 5.49.1.240nd_H2SO4_a01 . . . . .  | 165 |
| 5.49.1.241ind_HBr . . . . .       | 165 |
| 5.49.1.242nd_HBr_a01 . . . . .    | 165 |
| 5.49.1.243nd_HCHO . . . . .       | 165 |
| 5.49.1.244ind_HCHO_a01 . . . . .  | 165 |
| 5.49.1.245nd_HCl . . . . .        | 165 |
| 5.49.1.246nd_HCl_a01 . . . . .    | 165 |
| 5.49.1.247nd_HCO3m_a01 . . . . .  | 165 |
| 5.49.1.248nd_HCOC5 . . . . .      | 165 |
| 5.49.1.249nd_HCOCH2CHO . . . . .  | 165 |
| 5.49.1.250nd_HCOCH2CO2H . . . . . | 165 |
| 5.49.1.251ind_HCOCH2CO3 . . . . . | 165 |
| 5.49.1.252nd_HCOCH2CO3H . . . . . | 165 |
| 5.49.1.253nd_HCOCH2O2 . . . . .   | 165 |
| 5.49.1.254nd_HCOCO2H . . . . .    | 165 |
| 5.49.1.255nd_HCOCO3 . . . . .     | 165 |
| 5.49.1.256nd_HCOCO3A . . . . .    | 165 |
| 5.49.1.257nd_HCOCO3H . . . . .    | 166 |
| 5.49.1.258nd_HCOOH . . . . .      | 166 |
| 5.49.1.259nd_HCOOH_a01 . . . . .  | 166 |
| 5.49.1.260nd_HCOOm_a01 . . . . .  | 166 |
| 5.49.1.261ind_Hg . . . . .        | 166 |
| 5.49.1.262nd_Hg_a01 . . . . .     | 166 |
| 5.49.1.263nd_HgBr . . . . .       | 166 |

|                                     |     |
|-------------------------------------|-----|
| 5.49.1.264nd_HgBr2 . . . . .        | 166 |
| 5.49.1.265nd_HgBr2_a01 . . . . .    | 166 |
| 5.49.1.266nd_HgBr3m_a01 . . . . .   | 166 |
| 5.49.1.267nd_HgBr4mm_a01 . . . . .  | 166 |
| 5.49.1.268nd_HgBrp_a01 . . . . .    | 166 |
| 5.49.1.269nd_HgCl . . . . .         | 166 |
| 5.49.1.270nd_HgCl2 . . . . .        | 166 |
| 5.49.1.271nd_HgCl2_a01 . . . . .    | 166 |
| 5.49.1.272nd_HgCl3m_a01 . . . . .   | 166 |
| 5.49.1.273nd_HgCl4mm_a01 . . . . .  | 166 |
| 5.49.1.274nd_HgClp_a01 . . . . .    | 166 |
| 5.49.1.275nd_HgO . . . . .          | 166 |
| 5.49.1.276nd_HgO_a01 . . . . .      | 166 |
| 5.49.1.277nd_HgOH_a01 . . . . .     | 166 |
| 5.49.1.278nd_HgOHCl_a01 . . . . .   | 166 |
| 5.49.1.279nd_HgOHOH_a01 . . . . .   | 167 |
| 5.49.1.280nd_HgOHp_a01 . . . . .    | 167 |
| 5.49.1.281nd_Hgp_a01 . . . . .      | 167 |
| 5.49.1.282nd_Hgpp_a01 . . . . .     | 167 |
| 5.49.1.283nd_HgSO32mm_a01 . . . . . | 167 |
| 5.49.1.284nd_HgSO3_a01 . . . . .    | 167 |
| 5.49.1.285nd_HI . . . . .           | 167 |
| 5.49.1.286nd_HI_a01 . . . . .       | 167 |
| 5.49.1.287nd_HIO3 . . . . .         | 167 |
| 5.49.1.288nd_HIO3_a01 . . . . .     | 167 |
| 5.49.1.289nd_HNO . . . . .          | 167 |
| 5.49.1.290nd_HNO3 . . . . .         | 167 |
| 5.49.1.291nd_HNO3_a01 . . . . .     | 167 |
| 5.49.1.292nd_HNO4 . . . . .         | 167 |
| 5.49.1.293nd_HNO4_a01 . . . . .     | 167 |
| 5.49.1.294nd_HO12CO3C4 . . . . .    | 167 |
| 5.49.1.295nd_HO2 . . . . .          | 167 |
| 5.49.1.296nd_HO2_a01 . . . . .      | 167 |
| 5.49.1.297nd_HOBr . . . . .         | 167 |

|                                    |     |
|------------------------------------|-----|
| 5.49.1.298nd_HOBr_a01 . . . . .    | 167 |
| 5.49.1.299nd_HOC2H4CO2H . . . . .  | 167 |
| 5.49.1.300nd_HOC2H4CO3 . . . . .   | 167 |
| 5.49.1.301ind_HOC2H4CO3H . . . . . | 168 |
| 5.49.1.302nd_HOCH2CH2O . . . . .   | 168 |
| 5.49.1.303nd_HOCH2CH2O2 . . . . .  | 168 |
| 5.49.1.304nd_HOCH2CHO . . . . .    | 168 |
| 5.49.1.305nd_HOCH2CO2H . . . . .   | 168 |
| 5.49.1.306nd_HOCH2CO3 . . . . .    | 168 |
| 5.49.1.307nd_HOCH2CO3H . . . . .   | 168 |
| 5.49.1.308nd_HOCH2COCHO . . . . .  | 168 |
| 5.49.1.309nd_HOCH2COCO2H . . . . . | 168 |
| 5.49.1.310nd_HOCH2O2 . . . . .     | 168 |
| 5.49.1.311ind_HOCH2O2NO2 . . . . . | 168 |
| 5.49.1.312nd_HOCH2OH . . . . .     | 168 |
| 5.49.1.313nd_HOCH2OOH . . . . .    | 168 |
| 5.49.1.314nd_HOCl . . . . .        | 168 |
| 5.49.1.315nd_HOCl_a01 . . . . .    | 168 |
| 5.49.1.316nd_HOI . . . . .         | 168 |
| 5.49.1.317nd_HOI_a01 . . . . .     | 168 |
| 5.49.1.318nd_HONO . . . . .        | 168 |
| 5.49.1.319nd_HONO_a01 . . . . .    | 168 |
| 5.49.1.320nd_HOOCH2CO3 . . . . .   | 169 |
| 5.49.1.321ind_HOONO . . . . .      | 169 |
| 5.49.1.322nd_Hp . . . . .          | 169 |
| 5.49.1.323nd_Hp_a01 . . . . .      | 169 |
| 5.49.1.324nd_Hp_cs . . . . .       | 169 |
| 5.49.1.325nd_HSO3m_a01 . . . . .   | 169 |
| 5.49.1.326nd_HSO4m_a01 . . . . .   | 169 |
| 5.49.1.327nd_HSO5m_a01 . . . . .   | 169 |
| 5.49.1.328nd_HYETHO2H . . . . .    | 169 |
| 5.49.1.329nd_HYPERACET . . . . .   | 169 |
| 5.49.1.330nd_HYPROPO2 . . . . .    | 169 |
| 5.49.1.331ind_HYPROPO2H . . . . .  | 169 |

|                         |     |
|-------------------------|-----|
| 5.49.1.332nd_I          | 169 |
| 5.49.1.333nd_I2         | 169 |
| 5.49.1.334nd_I2_a01     | 169 |
| 5.49.1.335nd_I2O2       | 169 |
| 5.49.1.336nd_IBr        | 169 |
| 5.49.1.337nd_IBr2m_a01  | 169 |
| 5.49.1.338nd_IBr_a01    | 169 |
| 5.49.1.339nd_IC3H7NO3   | 169 |
| 5.49.1.340nd_IC3H7O2    | 169 |
| 5.49.1.341nd_IC3H7OOH   | 169 |
| 5.49.1.342nd_ICl        | 170 |
| 5.49.1.343nd_ICl2m_a01  | 170 |
| 5.49.1.344nd_ICl_a01    | 170 |
| 5.49.1.345nd_IClBrm_a01 | 170 |
| 5.49.1.346nd_Im_a01     | 170 |
| 5.49.1.347nd_INO2       | 170 |
| 5.49.1.348nd_INO3       | 170 |
| 5.49.1.349nd_IO         | 170 |
| 5.49.1.350nd_IO2m_a01   | 170 |
| 5.49.1.351nd_IO3m_a01   | 170 |
| 5.49.1.352nd_IO_a01     | 170 |
| 5.49.1.353nd_IPART      | 170 |
| 5.49.1.354nd_ISO2       | 170 |
| 5.49.1.355nd_ISON       | 170 |
| 5.49.1.356nd_ISO0H      | 170 |
| 5.49.1.357nd_ISOPA0H    | 170 |
| 5.49.1.358nd_ISOPBNO3   | 170 |
| 5.49.1.359nd_ISOPBO2    | 170 |
| 5.49.1.360nd_ISOPBOH    | 170 |
| 5.49.1.361nd_ISOPBOOH   | 170 |
| 5.49.1.362nd_ISOPDNO3   | 170 |
| 5.49.1.363nd_ISOPDO2    | 170 |
| 5.49.1.364nd_ISOPDOH    | 170 |
| 5.49.1.365nd_ISOPDOOH   | 170 |

|                                    |     |
|------------------------------------|-----|
| 5.49.1.366nd_kJmol . . . . .       | 171 |
| 5.49.1.367nd_LAPINABNO3 . . . . .  | 171 |
| 5.49.1.368nd_LAPINABO2 . . . . .   | 171 |
| 5.49.1.369nd_LAPINABOOH . . . . .  | 171 |
| 5.49.1.370nd_LC4H9NO3 . . . . .    | 171 |
| 5.49.1.371nd_LC4H9O2 . . . . .     | 171 |
| 5.49.1.372nd_LC4H9OOH . . . . .    | 171 |
| 5.49.1.373nd_LC578O2 . . . . .     | 171 |
| 5.49.1.374nd_LC578OOH . . . . .    | 171 |
| 5.49.1.375nd_LC5PAN1719 . . . . .  | 171 |
| 5.49.1.376nd_LCARBON . . . . .     | 171 |
| 5.49.1.377nd_LHC4ACCHO . . . . .   | 171 |
| 5.49.1.378nd_LHC4ACCO2H . . . . .  | 171 |
| 5.49.1.379nd_LHC4ACCO3 . . . . .   | 171 |
| 5.49.1.380nd_LHC4ACCO3H . . . . .  | 171 |
| 5.49.1.381nd_LHMKABO2 . . . . .    | 171 |
| 5.49.1.382nd_LHMKABOOH . . . . .   | 171 |
| 5.49.1.383nd_LHOC3H6O2 . . . . .   | 171 |
| 5.49.1.384nd_LHOC3H6OOH . . . . .  | 171 |
| 5.49.1.385nd_LISOPACNO3 . . . . .  | 172 |
| 5.49.1.386nd_LISOPACO2 . . . . .   | 172 |
| 5.49.1.387nd_LISOPACOOH . . . . .  | 172 |
| 5.49.1.388nd_LMEKO2 . . . . .      | 172 |
| 5.49.1.389nd_LMEKOOH . . . . .     | 172 |
| 5.49.1.390nd_LMVKOHABO2 . . . . .  | 172 |
| 5.49.1.391nd_LMVKOHABOOH . . . . . | 172 |
| 5.49.1.392nd_LNAPINABO2 . . . . .  | 172 |
| 5.49.1.393nd_LNAPINABOOH . . . . . | 172 |
| 5.49.1.394nd_LNBPINABO2 . . . . .  | 172 |
| 5.49.1.395nd_LNBPINABOOH . . . . . | 172 |
| 5.49.1.396nd_LNISO3 . . . . .      | 172 |
| 5.49.1.397nd_LNISOOH . . . . .     | 172 |
| 5.49.1.398nd_LO3s . . . . .        | 172 |
| 5.49.1.399nd_MACO2H . . . . .      | 172 |

|                          |     |
|--------------------------|-----|
| 5.49.1.400nd_MACO3       | 172 |
| 5.49.1.401nd_MACO3H      | 172 |
| 5.49.1.402nd_MACR        | 172 |
| 5.49.1.403nd_MACRO2      | 172 |
| 5.49.1.404nd_MACROH      | 172 |
| 5.49.1.405nd_MACROOH     | 173 |
| 5.49.1.406nd_MEK         | 173 |
| 5.49.1.407nd_MENTHEN6ONE | 173 |
| 5.49.1.408nd_MGLYOX      | 173 |
| 5.49.1.409nd_MPAN        | 173 |
| 5.49.1.410nd_MVK         | 173 |
| 5.49.1.411nd_MVKO2       | 173 |
| 5.49.1.412nd_MVKOH       | 173 |
| 5.49.1.413nd_MVKOOH      | 173 |
| 5.49.1.414nd_N           | 173 |
| 5.49.1.415nd_N2          | 173 |
| 5.49.1.416nd_N2D         | 173 |
| 5.49.1.417nd_N2O         | 173 |
| 5.49.1.418nd_N2O5        | 173 |
| 5.49.1.419nd_N2O5_a01    | 173 |
| 5.49.1.420nd_N2O_c       | 173 |
| 5.49.1.421nd_N2p         | 173 |
| 5.49.1.422nd_NACA        | 173 |
| 5.49.1.423nd_Nap_a01     | 173 |
| 5.49.1.424nd_NC4CHO      | 173 |
| 5.49.1.425nd_NC4H10      | 173 |
| 5.49.1.426nd_NH2         | 173 |
| 5.49.1.427nd_NH2O        | 173 |
| 5.49.1.428nd_NH2OH       | 174 |
| 5.49.1.429nd_NH3         | 174 |
| 5.49.1.430nd_NH3_a01     | 174 |
| 5.49.1.431nd_NH4p_a01    | 174 |
| 5.49.1.432nd_NHOH        | 174 |
| 5.49.1.433nd_NISOPO2     | 174 |



|                                       |     |
|---------------------------------------|-----|
| 5.49.1.434ind_NISOPOOH . . . . .      | 174 |
| 5.49.1.435nd_NO . . . . .             | 174 |
| 5.49.1.436nd_NO2 . . . . .            | 174 |
| 5.49.1.437nd_NO2_a01 . . . . .        | 174 |
| 5.49.1.438nd_NO2m_a01 . . . . .       | 174 |
| 5.49.1.439nd_NO3 . . . . .            | 174 |
| 5.49.1.440nd_NO3_a01 . . . . .        | 174 |
| 5.49.1.441ind_NO3m_a01 . . . . .      | 174 |
| 5.49.1.442nd_NO3m_cs . . . . .        | 174 |
| 5.49.1.443nd_NO4m_a01 . . . . .       | 174 |
| 5.49.1.444ind_NO_a01 . . . . .        | 174 |
| 5.49.1.445nd_NOA . . . . .            | 174 |
| 5.49.1.446nd_NOp . . . . .            | 174 |
| 5.49.1.447nd_NOPINDCO . . . . .       | 174 |
| 5.49.1.448nd_NOPINDO2 . . . . .       | 174 |
| 5.49.1.449nd_NOPINDOOH . . . . .      | 174 |
| 5.49.1.450nd_NOPINONE . . . . .       | 174 |
| 5.49.1.451ind_NOPINOO . . . . .       | 175 |
| 5.49.1.452nd_NORPINAL . . . . .       | 175 |
| 5.49.1.453nd_NORPINIC . . . . .       | 175 |
| 5.49.1.454ind_Np . . . . .            | 175 |
| 5.49.1.455nd_O1D . . . . .            | 175 |
| 5.49.1.456nd_O2 . . . . .             | 175 |
| 5.49.1.457nd_O2_a01 . . . . .         | 175 |
| 5.49.1.458nd_O2m_a01 . . . . .        | 175 |
| 5.49.1.459nd_O2p . . . . .            | 175 |
| 5.49.1.460nd_O3 . . . . .             | 175 |
| 5.49.1.461ind_O3_a01 . . . . .        | 175 |
| 5.49.1.462nd_O3P . . . . .            | 175 |
| 5.49.1.463nd_O3s . . . . .            | 175 |
| 5.49.1.464ind_OCIO . . . . .          | 175 |
| 5.49.1.465nd_OCS . . . . .            | 175 |
| 5.49.1.466nd_OH . . . . .             | 175 |
| 5.49.1.467nd_OH2MENTHEN6ONE . . . . . | 175 |

|                                        |     |
|----------------------------------------|-----|
| 5.49.1.468nd_OH_a01 . . . . .          | 175 |
| 5.49.1.469nd_OHm_a01 . . . . .         | 175 |
| 5.49.1.470nd_OHMENTHEN6ONEO2 . . . . . | 175 |
| 5.49.1.471nd_OIO . . . . .             | 175 |
| 5.49.1.472nd_Op . . . . .              | 175 |
| 5.49.1.473nd_PAN . . . . .             | 175 |
| 5.49.1.474nd_PAN_a01 . . . . .         | 176 |
| 5.49.1.475nd_PERPINONIC . . . . .      | 176 |
| 5.49.1.476nd_PHAN . . . . .            | 176 |
| 5.49.1.477nd_PINAL . . . . .           | 176 |
| 5.49.1.478nd_PINALNO3 . . . . .        | 176 |
| 5.49.1.479nd_PINALO2 . . . . .         | 176 |
| 5.49.1.480nd_PINALOOH . . . . .        | 176 |
| 5.49.1.481nd_PINIC . . . . .           | 176 |
| 5.49.1.482nd_PINONIC . . . . .         | 176 |
| 5.49.1.483nd_PR2O2HNO3 . . . . .       | 176 |
| 5.49.1.484nd_PROD1_a01 . . . . .       | 176 |
| 5.49.1.485nd_PROD2_a01 . . . . .       | 176 |
| 5.49.1.486nd_PRONO3BO2 . . . . .       | 176 |
| 5.49.1.487nd_RBr . . . . .             | 176 |
| 5.49.1.488nd_RCly . . . . .            | 176 |
| 5.49.1.489nd_RGM_cs . . . . .          | 176 |
| 5.49.1.490nd_RH2O . . . . .            | 176 |
| 5.49.1.491nd_RNOy . . . . .            | 176 |
| 5.49.1.492nd_RO6R1NO3 . . . . .        | 176 |
| 5.49.1.493nd_RO6R1O2 . . . . .         | 176 |
| 5.49.1.494nd_RO6R1OOH . . . . .        | 176 |
| 5.49.1.495nd_RO6R3NO3 . . . . .        | 176 |
| 5.49.1.496nd_RO6R3O2 . . . . .         | 177 |
| 5.49.1.497nd_RO6R3OOH . . . . .        | 177 |
| 5.49.1.498nd_RO6R3P . . . . .          | 177 |
| 5.49.1.499nd_ROO6R1NO3 . . . . .       | 177 |
| 5.49.1.500nd_ROO6R1O2 . . . . .        | 177 |
| 5.49.1.501nd_ROO6R1OOH . . . . .       | 177 |

|                                  |     |
|----------------------------------|-----|
| 5.49.1.502nd_ROO6R3NO3 . . . . . | 177 |
| 5.49.1.503nd_ROO6R3O . . . . .   | 177 |
| 5.49.1.504nd_ROO6R3O2 . . . . .  | 177 |
| 5.49.1.505nd_ROO6R3OOH . . . . . | 177 |
| 5.49.1.506nd_ROO6R4P . . . . .   | 177 |
| 5.49.1.507nd_ROO6R5O2 . . . . .  | 177 |
| 5.49.1.508nd_ROO6R5P . . . . .   | 177 |
| 5.49.1.509nd_S . . . . .         | 177 |
| 5.49.1.510nd_SF6 . . . . .       | 177 |
| 5.49.1.511ind_SH . . . . .       | 177 |
| 5.49.1.512nd_SO . . . . .        | 177 |
| 5.49.1.513nd_SO2 . . . . .       | 177 |
| 5.49.1.514ind_SO2_a01 . . . . .  | 177 |
| 5.49.1.515nd_SO3 . . . . .       | 177 |
| 5.49.1.516nd_SO3m_a01 . . . . .  | 177 |
| 5.49.1.517nd_SO3mm_a01 . . . . . | 177 |
| 5.49.1.518nd_SO4m_a01 . . . . .  | 178 |
| 5.49.1.519nd_SO4mm_a01 . . . . . | 178 |
| 5.49.1.520nd_SO5m_a01 . . . . .  | 178 |
| 5.49.1.521indf_CO2 . . . . .     | 178 |
| 5.49.1.522ndf_N2 . . . . .       | 178 |
| 5.49.1.523ndf_O2 . . . . .       | 178 |
| 5.49.1.524LU_NONZERO . . . . .   | 178 |
| 5.49.1.525NFIK . . . . .         | 178 |
| 5.49.1.526NFIKST . . . . .       | 178 |
| 5.49.1.527NLOOKAT . . . . .      | 178 |
| 5.49.1.528NMASS . . . . .        | 178 |
| 5.49.1.529NMONITOR . . . . .     | 178 |
| 5.49.1.530NONZERO . . . . .      | 178 |
| 5.49.1.531NREACT . . . . .       | 178 |
| 5.49.1.532NSPEC . . . . .        | 178 |
| 5.49.1.533NVAR . . . . .         | 178 |
| 5.49.1.534NVARACT . . . . .      | 178 |
| 5.49.1.535NVARST . . . . .       | 178 |

|           |                                            |     |
|-----------|--------------------------------------------|-----|
| 5.50      | messy_mecca_kpp_Precision Module Reference | 178 |
| 5.50.1    | Member Data Documentation                  | 179 |
| 5.50.1.1  | dp                                         | 179 |
| 5.50.1.2  | qp                                         | 179 |
| 5.50.1.3  | sp                                         | 179 |
| 5.51      | messy_mecca_kpp_Rates Module Reference     | 179 |
| 5.51.1    | Member Function/Subroutine Documentation   | 180 |
| 5.51.1.1  | alpha_AN                                   | 180 |
| 5.51.1.2  | ARR                                        | 180 |
| 5.51.1.3  | ARR2                                       | 180 |
| 5.51.1.4  | EP2                                        | 180 |
| 5.51.1.5  | EP3                                        | 180 |
| 5.51.1.6  | FALL                                       | 180 |
| 5.51.1.7  | k_3rd                                      | 180 |
| 5.51.1.8  | k_3rd_iupac                                | 180 |
| 5.51.1.9  | k_arr                                      | 180 |
| 5.51.1.10 | k_limited                                  | 180 |
| 5.51.1.11 | k_N2_O                                     | 180 |
| 5.51.1.12 | k_Op_N2                                    | 180 |
| 5.51.1.13 | k_Op_O2                                    | 180 |
| 5.51.1.14 | k_SIV_H2O2                                 | 180 |
| 5.51.1.15 | Update_PHOTO                               | 181 |
| 5.51.1.16 | Update_RCONST                              | 181 |
| 5.51.1.17 | Update_SUN                                 | 181 |
| 5.52      | messy_mecca_kpp_Util Module Reference      | 181 |
| 5.52.1    | Member Function/Subroutine Documentation   | 181 |
| 5.52.1.1  | CloseSaveData                              | 181 |
| 5.52.1.2  | GenerateMatlab                             | 181 |
| 5.52.1.3  | GetMass                                    | 181 |
| 5.52.1.4  | initialize_indexarrays                     | 181 |
| 5.52.1.5  | InitSaveData                               | 181 |
| 5.52.1.6  | SaveData                                   | 181 |
| 5.52.1.7  | Shuffle_kpp2user                           | 181 |
| 5.52.1.8  | Shuffle_user2kpp                           | 182 |

|           |                                          |     |
|-----------|------------------------------------------|-----|
| 5.52.1.9  | tag2num                                  | 182 |
| 5.53      | messy_mecca_tag_box Module Reference     | 182 |
| 5.53.1    | Member Function/Subroutine Documentation | 182 |
| 5.53.1.1  | mecca_tag_emis                           | 182 |
| 5.53.1.2  | mecca_tag_finish                         | 182 |
| 5.53.1.3  | mecca_tag_init                           | 182 |
| 5.53.1.4  | mecca_tag_prepare                        | 182 |
| 5.53.1.5  | mecca_tag_process                        | 182 |
| 5.53.1.6  | mecca_tag_resetPTs                       | 182 |
| 5.53.1.7  | mecca_tag_result                         | 182 |
| 5.54      | messy_radjimt Module Reference           | 183 |
| 5.54.1    | Member Function/Subroutine Documentation | 185 |
| 5.54.1.1  | BranchingRatios                          | 185 |
| 5.54.1.2  | Chapmann                                 | 185 |
| 5.54.1.3  | CMAT1_FLUXES                             | 185 |
| 5.54.1.4  | CO2ChapManHeating                        | 185 |
| 5.54.1.5  | H2O2_cross_section                       | 185 |
| 5.54.1.6  | H2O2_photorate                           | 185 |
| 5.54.1.7  | H2O_IR                                   | 186 |
| 5.54.1.8  | MesoSol                                  | 186 |
| 5.54.1.9  | radjimt_read_nml_ctrl                    | 186 |
| 5.54.1.10 | radjimt_readfluxes                       | 186 |
| 5.54.1.11 | S2K_FLUXES                               | 186 |
| 5.54.1.12 | S2K_INTERP                               | 186 |
| 5.54.1.13 | Secondaries                              | 186 |
| 5.54.1.14 | ThermoSol                                | 187 |
| 5.54.2    | Member Data Documentation                | 187 |
| 5.54.2.1  | b_aurqn2_b1                              | 187 |
| 5.54.2.2  | b_aurqn2_b2                              | 187 |
| 5.54.2.3  | b_aurqn2_b3                              | 187 |
| 5.54.2.4  | b_aurqn2_b4                              | 187 |
| 5.54.2.5  | b_aurqo2_b1                              | 187 |
| 5.54.2.6  | b_aurqo2_b2                              | 187 |
| 5.54.2.7  | b_jin2_b1                                | 187 |

|           |                      |     |
|-----------|----------------------|-----|
| 5.54.2.8  | b_jin2_b2            | 187 |
| 5.54.2.9  | b_jin2_b3            | 187 |
| 5.54.2.10 | b_jio2_b1            | 187 |
| 5.54.2.11 | b_jio2_b2            | 187 |
| 5.54.2.12 | b_sen2_b1            | 187 |
| 5.54.2.13 | b_sen2_b2            | 187 |
| 5.54.2.14 | b_sen2_b3            | 187 |
| 5.54.2.15 | b_sen2_b4            | 187 |
| 5.54.2.16 | b_seo2_b1            | 187 |
| 5.54.2.17 | b_seo2_b2            | 188 |
| 5.54.2.18 | branch               | 188 |
| 5.54.2.19 | chem_heat_on         | 188 |
| 5.54.2.20 | chem_heat_on_last    | 188 |
| 5.54.2.21 | co2_cool_l           | 188 |
| 5.54.2.22 | CSAO3                | 188 |
| 5.54.2.23 | CSH2O2               | 188 |
| 5.54.2.24 | euv_heat_l           | 188 |
| 5.54.2.25 | euveff               | 188 |
| 5.54.2.26 | file_all_Xsections   | 188 |
| 5.54.2.27 | file_O3_Xsections    | 188 |
| 5.54.2.28 | file_s2k_fluxes      | 188 |
| 5.54.2.29 | file_sk2_h2o2_fluxes | 188 |
| 5.54.2.30 | GSCON                | 188 |
| 5.54.2.31 | heatcool_rates       | 188 |
| 5.54.2.32 | ht_branches          | 188 |
| 5.54.2.33 | htlyeff              | 188 |
| 5.54.2.34 | jx                   | 188 |
| 5.54.2.35 | maxn                 | 188 |
| 5.54.2.36 | minn                 | 188 |
| 5.54.2.37 | modstr               | 188 |
| 5.54.2.38 | modver               | 188 |
| 5.54.2.39 | no_cool_l            | 189 |
| 5.54.2.40 | NWAVES_FUV           | 189 |
| 5.54.2.41 | o2_meso_heat_l       | 189 |

|           |                                          |     |
|-----------|------------------------------------------|-----|
| 5.54.2.42 | O2eff_bulk                               | 189 |
| 5.54.2.43 | o3_chap_heat_l                           | 189 |
| 5.54.2.44 | o3_cool_l                                | 189 |
| 5.54.2.45 | o3_hart_heat_l                           | 189 |
| 5.54.2.46 | o3_herz_heat_l                           | 189 |
| 5.54.2.47 | o3_hugg_heat_l                           | 189 |
| 5.54.2.48 | O3eff_bulk                               | 189 |
| 5.54.2.49 | o_cool_l                                 | 189 |
| 5.54.2.50 | PEN2                                     | 189 |
| 5.54.2.51 | PEO2                                     | 189 |
| 5.54.2.52 | PEOP                                     | 189 |
| 5.54.2.53 | S2K_FLUX_FUV                             | 189 |
| 5.54.2.54 | S2K_h2o2_ALLFLUXES                       | 189 |
| 5.54.2.55 | src1eff                                  | 189 |
| 5.54.2.56 | total_cool_l                             | 189 |
| 5.54.2.57 | total_heat_l                             | 189 |
| 5.54.2.58 | uv_heat_l                                | 189 |
| 5.54.2.59 | WAVELS_FUV                               | 189 |
| 5.55      | messy_radjimt_box Module Reference       | 190 |
| 5.55.1    | Member Function/Subroutine Documentation | 190 |
| 5.55.1.1  | radjimt_finish                           | 190 |
| 5.55.1.2  | radjimt_init                             | 191 |
| 5.55.1.3  | radjimt_physc                            | 191 |
| 5.55.1.4  | radjimt_result                           | 191 |
| 5.55.2    | Member Data Documentation                | 191 |
| 5.55.2.1  | cp1d                                     | 191 |
| 5.55.2.2  | den1d                                    | 191 |
| 5.55.2.3  | eccentric                                | 191 |
| 5.55.2.4  | f107                                     | 191 |
| 5.55.2.5  | gas_H2O2_1d                              | 191 |
| 5.55.2.6  | gas_H2O_1d                               | 191 |
| 5.55.2.7  | gas_O3_1d                                | 191 |
| 5.55.2.8  | GRAV0                                    | 191 |
| 5.55.2.9  | heatrates                                | 191 |

|           |                                          |     |
|-----------|------------------------------------------|-----|
| 5.55.2.10 | ht1d                                     | 191 |
| 5.55.2.11 | jpress                                   | 191 |
| 5.55.2.12 | jrow                                     | 191 |
| 5.55.2.13 | l_heating                                | 192 |
| 5.55.2.14 | l_reduceO3heating                        | 192 |
| 5.55.2.15 | mmw_gas1                                 | 192 |
| 5.55.2.16 | mmw_gas2                                 | 192 |
| 5.55.2.17 | ncid_radjmt                              | 192 |
| 5.55.2.18 | nd_gas1_1d                               | 192 |
| 5.55.2.19 | nd_gas2_1d                               | 192 |
| 5.55.2.20 | nd_gas3_1d                               | 192 |
| 5.55.2.21 | nden1d                                   | 192 |
| 5.55.2.22 | nlev                                     | 192 |
| 5.55.2.23 | r0_eff                                   | 192 |
| 5.55.2.24 | scht1d                                   | 192 |
| 5.55.2.25 | temp1d                                   | 192 |
| 5.56      | messy_readj Module Reference             | 192 |
| 5.56.1    | Member Data Documentation                | 192 |
| 5.56.1.1  | jx                                       | 193 |
| 5.57      | messy_readj_box Module Reference         | 193 |
| 5.57.1    | Member Function/Subroutine Documentation | 193 |
| 5.57.1.1  | readj_init                               | 193 |
| 5.58      | messy_sappho Module Reference            | 193 |
| 5.58.1    | Member Function/Subroutine Documentation | 193 |
| 5.58.1.1  | jvalues                                  | 194 |
| 5.58.2    | Member Data Documentation                | 194 |
| 5.58.2.1  | jx                                       | 194 |
| 5.58.2.2  | modstr                                   | 194 |
| 5.59      | messy_sappho_box Module Reference        | 194 |
| 5.59.1    | Member Function/Subroutine Documentation | 195 |
| 5.59.1.1  | sappho_finish                            | 195 |
| 5.59.1.2  | sappho_init                              | 195 |
| 5.59.1.3  | sappho_physc                             | 195 |
| 5.59.1.4  | sappho_result                            | 195 |



|           |                                                    |     |
|-----------|----------------------------------------------------|-----|
| 5.59.2    | Member Data Documentation . . . . .                | 195 |
| 5.59.2.1  | ncid_sappho . . . . .                              | 195 |
| 5.59.2.2  | photon . . . . .                                   | 195 |
| 5.60      | messy_semidep_box Module Reference . . . . .       | 195 |
| 5.60.1    | Member Function/Subroutine Documentation . . . . . | 195 |
| 5.60.1.1  | drydep . . . . .                                   | 196 |
| 5.60.1.2  | emission . . . . .                                 | 197 |
| 5.60.1.3  | semidep_physc . . . . .                            | 197 |
| 5.61      | messy_traject_box Module Reference . . . . .       | 197 |
| 5.61.1    | Member Function/Subroutine Documentation . . . . . | 199 |
| 5.61.1.1  | get_model_start_end . . . . .                      | 199 |
| 5.61.1.2  | get_physc_data . . . . .                           | 199 |
| 5.61.1.3  | traject_finish . . . . .                           | 199 |
| 5.61.1.4  | traject_init . . . . .                             | 199 |
| 5.61.1.5  | traject_physc . . . . .                            | 199 |
| 5.61.1.6  | traject_result . . . . .                           | 199 |
| 5.61.2    | Member Data Documentation . . . . .                | 199 |
| 5.61.2.1  | cair_old . . . . .                                 | 199 |
| 5.61.2.2  | dimid_time . . . . .                               | 199 |
| 5.61.2.3  | intpct . . . . .                                   | 199 |
| 5.61.2.4  | jno21 . . . . .                                    | 199 |
| 5.61.2.5  | jno22 . . . . .                                    | 199 |
| 5.61.2.6  | l_next_trajp . . . . .                             | 199 |
| 5.61.2.7  | lat1 . . . . .                                     | 199 |
| 5.61.2.8  | lat2 . . . . .                                     | 199 |
| 5.61.2.9  | len_time . . . . .                                 | 199 |
| 5.61.2.10 | lon1 . . . . .                                     | 199 |
| 5.61.2.11 | lon2 . . . . .                                     | 199 |
| 5.61.2.12 | lontmp . . . . .                                   | 199 |
| 5.61.2.13 | ncid_jval . . . . .                                | 199 |
| 5.61.2.14 | ncid_physc . . . . .                               | 199 |
| 5.61.2.15 | ncid_traj . . . . .                                | 199 |
| 5.61.2.16 | press1 . . . . .                                   | 199 |
| 5.61.2.17 | press2 . . . . .                                   | 200 |

|                                                                       |     |
|-----------------------------------------------------------------------|-----|
| 5.61.2.18 ratio1 . . . . .                                            | 200 |
| 5.61.2.19 ratio2 . . . . .                                            | 200 |
| 5.61.2.20 relhum1 . . . . .                                           | 200 |
| 5.61.2.21 relhum2 . . . . .                                           | 200 |
| 5.61.2.22 temp1 . . . . .                                             | 200 |
| 5.61.2.23 temp2 . . . . .                                             | 200 |
| 5.61.2.24 time1 . . . . .                                             | 200 |
| 5.61.2.25 time2 . . . . .                                             | 200 |
| 5.61.2.26 timesteplen_orig . . . . .                                  | 200 |
| 5.61.2.27 trajpct . . . . .                                           | 200 |
| 5.61.2.28 varid_jno2 . . . . .                                        | 200 |
| 5.61.2.29 varid_lat . . . . .                                         | 200 |
| 5.61.2.30 varid_lon . . . . .                                         | 200 |
| 5.61.2.31 varid_press . . . . .                                       | 200 |
| 5.61.2.32 varid_relhum . . . . .                                      | 200 |
| 5.61.2.33 varid_temp . . . . .                                        | 200 |
| 5.61.2.34 varid_time . . . . .                                        | 200 |
| 5.62 messy_main_rnd_mtw_ja::mod_by_x Interface Reference . . . . .    | 200 |
| 5.62.1 Member Function/Subroutine Documentation . . . . .             | 201 |
| 5.62.1.1 gf2x_mod_by_x . . . . .                                      | 201 |
| 5.63 messy_main_rnd_mtw_ja::mult Interface Reference . . . . .        | 201 |
| 5.63.1 Member Function/Subroutine Documentation . . . . .             | 201 |
| 5.63.1.1 gf2x_mult_kara . . . . .                                     | 201 |
| 5.64 messy_main_rnd_mtw_ja::mult_assign Interface Reference . . . . . | 201 |
| 5.64.1 Member Function/Subroutine Documentation . . . . .             | 201 |
| 5.64.1.1 gf2x_mult_assign_kara . . . . .                              | 201 |
| 5.65 messy_main_rnd_mtw_ja::mult_by_x Interface Reference . . . . .   | 202 |
| 5.65.1 Member Function/Subroutine Documentation . . . . .             | 202 |
| 5.65.1.1 gf2x_mult_by_x . . . . .                                     | 202 |
| 5.66 messy_main_rnd_mtw_ja::new Interface Reference . . . . .         | 202 |
| 5.66.1 Member Function/Subroutine Documentation . . . . .             | 202 |
| 5.66.1.1 gf2x_delete_prime . . . . .                                  | 202 |
| 5.66.1.2 gf2x_new . . . . .                                           | 202 |
| 5.67 messy_main_rnd_mtw_ja::pow Interface Reference . . . . .         | 202 |

|          |                                                      |     |
|----------|------------------------------------------------------|-----|
| 5.67.1   | Member Function/Subroutine Documentation             | 203 |
| 5.67.1.1 | gf2x_pow                                             | 203 |
| 5.67.1.2 | gf2x_pow_mod                                         | 203 |
| 5.68     | messy_main_rnd_mtw_ja::print_bit Interface Reference | 203 |
| 5.68.1   | Member Function/Subroutine Documentation             | 203 |
| 5.68.1.1 | gf2x_print_bit                                       | 203 |
| 5.69     | messy_main_rnd_mtw_ja::print_hex Interface Reference | 203 |
| 5.69.1   | Member Function/Subroutine Documentation             | 203 |
| 5.69.1.1 | gf2x_print_hex                                       | 203 |
| 5.70     | messy_main_tools::PTR_0D_ARRAY Type Reference        | 204 |
| 5.70.1   | Member Data Documentation                            | 204 |
| 5.70.1.1 | PTR                                                  | 204 |
| 5.71     | messy_main_tools::PTR_1D_ARRAY Type Reference        | 204 |
| 5.71.1   | Member Data Documentation                            | 204 |
| 5.71.1.1 | PTR                                                  | 204 |
| 5.72     | messy_main_tools::PTR_1D_ARRAY_INT Type Reference    | 204 |
| 5.72.1   | Member Data Documentation                            | 205 |
| 5.72.1.1 | PTR                                                  | 205 |
| 5.73     | messy_main_tools::PTR_2D_ARRAY Type Reference        | 205 |
| 5.73.1   | Member Data Documentation                            | 205 |
| 5.73.1.1 | PTR                                                  | 205 |
| 5.74     | messy_main_tools::PTR_3D_ARRAY Type Reference        | 205 |
| 5.74.1   | Member Data Documentation                            | 205 |
| 5.74.1.1 | PTR                                                  | 205 |
| 5.75     | messy_main_tools::PTR_4D_ARRAY Type Reference        | 205 |
| 5.75.1   | Member Data Documentation                            | 206 |
| 5.75.1.1 | PTR                                                  | 206 |
| 5.76     | messy_main_tools::PTR_5D_ARRAY Type Reference        | 206 |
| 5.76.1   | Member Data Documentation                            | 206 |
| 5.76.1.1 | PTR                                                  | 206 |
| 5.77     | messy_main_rnd_mtw_ja::rem Interface Reference       | 206 |
| 5.77.1   | Member Function/Subroutine Documentation             | 206 |
| 5.77.1.1 | gf2x_rem                                             | 206 |
| 5.77.1.2 | gf2x_rem_barrett                                     | 207 |

|          |                                                      |     |
|----------|------------------------------------------------------|-----|
| 5.78     | messy_main_tools::remap_bounds Interface Reference   | 207 |
| 5.78.1   | Member Function/Subroutine Documentation             | 207 |
| 5.78.1.1 | remap_bounds1                                        | 207 |
| 5.78.1.2 | remap_bounds2                                        | 207 |
| 5.78.1.3 | remap_bounds3                                        | 207 |
| 5.78.1.4 | remap_bounds4                                        | 207 |
| 5.79     | messy_main_rnd::rnd_jump Interface Reference         | 207 |
| 5.79.1   | Member Function/Subroutine Documentation             | 208 |
| 5.79.1.1 | rnd_jump_2                                           | 208 |
| 5.79.1.2 | rnd_jump_n                                           | 208 |
| 5.80     | messy_main_rnd_mtw_ja::set_coef Interface Reference  | 208 |
| 5.80.1   | Member Function/Subroutine Documentation             | 208 |
| 5.80.1.1 | gf2x_set_coef                                        | 208 |
| 5.81     | messy_main_rnd_mtw_ja::set_prime Interface Reference | 208 |
| 5.81.1   | Member Function/Subroutine Documentation             | 209 |
| 5.81.1.1 | gf2x_set_prime                                       | 209 |
| 5.82     | messy_main_rnd_mtw_ja::shift Interface Reference     | 209 |
| 5.82.1   | Member Function/Subroutine Documentation             | 209 |
| 5.82.1.1 | gf2x_shift                                           | 209 |
| 5.83     | messy_main_rnd_mtw_ja::square Interface Reference    | 209 |
| 5.83.1   | Member Function/Subroutine Documentation             | 209 |
| 5.83.1.1 | gf2x_square                                          | 209 |
| 5.84     | messy_main_tools::str Interface Reference            | 210 |
| 5.84.1   | Member Function/Subroutine Documentation             | 210 |
| 5.84.1.1 | str_integer                                          | 210 |
| 5.84.1.2 | str_logical                                          | 210 |
| 5.84.1.3 | str_real_dp                                          | 210 |
| 5.84.1.4 | str_real_sp                                          | 210 |
| 5.85     | messy_main_tools::str2num Interface Reference        | 210 |
| 5.85.1   | Member Function/Subroutine Documentation             | 210 |
| 5.85.1.1 | str2num_integer                                      | 210 |
| 5.85.1.2 | str2num_real_dp                                      | 211 |
| 5.85.1.3 | str2num_real_sp                                      | 211 |
| 5.86     | messy_main_tools::t_reset_par Type Reference         | 211 |

|          |                                                                                                   |            |
|----------|---------------------------------------------------------------------------------------------------|------------|
| 5.86.1   | Member Data Documentation . . . . .                                                               | 211        |
| 5.86.1.1 | l . . . . .                                                                                       | 211        |
| 5.86.1.2 | v . . . . .                                                                                       | 211        |
| 5.87     | messy_main_timer::time_days Type Reference . . . . .                                              | 211        |
| 5.87.1   | Member Data Documentation . . . . .                                                               | 211        |
| 5.87.1.1 | day . . . . .                                                                                     | 211        |
| 5.87.1.2 | init . . . . .                                                                                    | 211        |
| 5.87.1.3 | second . . . . .                                                                                  | 212        |
| 5.88     | messy_main_timer::timer_get_date Interface Reference . . . . .                                    | 212        |
| 5.88.1   | Member Function/Subroutine Documentation . . . . .                                                | 212        |
| 5.88.1.1 | timer_get_date_myd . . . . .                                                                      | 212        |
| 5.88.1.2 | timer_get_date_str . . . . .                                                                      | 212        |
| 5.89     | messy_main_timer::timer_set_date Interface Reference . . . . .                                    | 212        |
| 5.89.1   | Member Function/Subroutine Documentation . . . . .                                                | 212        |
| 5.89.1.1 | timer_set_date_myd . . . . .                                                                      | 212        |
| 5.89.1.2 | timer_set_date_myd_ds . . . . .                                                                   | 213        |
| 5.89.1.3 | timer_set_date_str . . . . .                                                                      | 213        |
| 5.89.1.4 | timer_set_date_str_ds . . . . .                                                                   | 213        |
| <b>6</b> | <b>File Documentation</b>                                                                         | <b>215</b> |
| 6.1      | /home/sander/e2/messy_d2.50s_rs/messy/mbm/caaba/caaba.f90 File -<br>Reference . . . . .           | 215        |
| 6.1.1    | Function/Subroutine Documentation . . . . .                                                       | 215        |
| 6.1.1.1  | caaba . . . . .                                                                                   | 215        |
| 6.1.1.2  | dilute . . . . .                                                                                  | 215        |
| 6.1.1.3  | dilute_once . . . . .                                                                             | 215        |
| 6.2      | /home/sander/e2/messy_d2.50s_rs/messy/mbm/caaba/caaba.nml File -<br>Reference . . . . .           | 215        |
| 6.3      | /home/sander/e2/messy_d2.50s_rs/messy/mbm/caaba/caaba_io.f90<br>File Reference . . . . .          | 215        |
| 6.4      | /home/sander/e2/messy_d2.50s_rs/messy/mbm/caaba/caaba_io_-<br>ascii.inc File Reference . . . . .  | 216        |
| 6.5      | /home/sander/e2/messy_d2.50s_rs/messy/mbm/caaba/caaba_io_-<br>netcdf.inc File Reference . . . . . | 216        |
| 6.6      | /home/sander/e2/messy_d2.50s_rs/messy/mbm/caaba/caaba_mem.f90<br>File Reference . . . . .         | 216        |

|          |                                                                                                        |     |
|----------|--------------------------------------------------------------------------------------------------------|-----|
| 6.7      | /home/sander/e2/messy_d2.50s_rs/messy/mbm/caaba/e4chem.nml -<br>File Reference . . . . .               | 216 |
| 6.8      | /home/sander/e2/messy_d2.50s_rs/messy/mbm/caaba/jval.nml File -<br>Reference . . . . .                 | 216 |
| 6.9      | /home/sander/e2/messy_d2.50s_rs/messy/mbm/caaba/mecca.nml File<br>Reference . . . . .                  | 216 |
| 6.10     | /home/sander/e2/messy_d2.50s_rs/messy/mbm/caaba/messy_cmn_-<br>gasag.f90 File Reference . . . . .      | 216 |
| 6.10.1   | Function/Subroutine Documentation . . . . .                                                            | 217 |
| 6.10.1.1 | add_alpha . . . . .                                                                                    | 217 |
| 6.10.1.2 | add_dryreac . . . . .                                                                                  | 217 |
| 6.10.1.3 | add_henry . . . . .                                                                                    | 217 |
| 6.10.1.4 | add_species . . . . .                                                                                  | 217 |
| 6.11     | /home/sander/e2/messy_d2.50s_rs/messy/mbm/caaba/messy_cmn_-<br>photol_mem.f90 File Reference . . . . . | 217 |
| 6.12     | /home/sander/e2/messy_d2.50s_rs/messy/mbm/caaba/messy_-<br>e4chem.f90 File Reference . . . . .         | 217 |
| 6.12.1   | Function/Subroutine Documentation . . . . .                                                            | 218 |
| 6.12.1.1 | ZFUNC3BODY . . . . .                                                                                   | 218 |
| 6.12.1.2 | ZFUNCPRODH2OHGX . . . . .                                                                              | 218 |
| 6.12.1.3 | ZFUNCPRODH2OLONG . . . . .                                                                             | 218 |
| 6.12.1.4 | ZFUNCPRODH2OSHORT . . . . .                                                                            | 218 |
| 6.12.1.5 | ZFUNCRATNNO . . . . .                                                                                  | 218 |
| 6.12.1.6 | ZFUNCRATNONO2 . . . . .                                                                                | 218 |
| 6.13     | /home/sander/e2/messy_d2.50s_rs/messy/mbm/caaba/messy_-<br>e4chem_box.f90 File Reference . . . . .     | 218 |
| 6.13.1   | Function/Subroutine Documentation . . . . .                                                            | 219 |
| 6.13.1.1 | check_range . . . . .                                                                                  | 219 |
| 6.13.1.2 | x0_mtchem . . . . .                                                                                    | 219 |
| 6.13.1.3 | x0_strato . . . . .                                                                                    | 219 |
| 6.14     | /home/sander/e2/messy_d2.50s_rs/messy/mbm/caaba/messy_jval.f90<br>File Reference . . . . .             | 219 |
| 6.14.1   | Function/Subroutine Documentation . . . . .                                                            | 219 |
| 6.14.1.1 | aero_2d . . . . .                                                                                      | 219 |
| 6.14.1.2 | column_cal . . . . .                                                                                   | 219 |
| 6.14.1.3 | flux_cal . . . . .                                                                                     | 220 |

|           |                                                                                         |     |
|-----------|-----------------------------------------------------------------------------------------|-----|
| 6.14.1.4  | pifm                                                                                    | 220 |
| 6.14.1.5  | pifmini                                                                                 | 220 |
| 6.14.1.6  | slingo                                                                                  | 220 |
| 6.15      | /home/sander/e2/messy_d2.50s_rs/messy/mbm/caaba/messy_jval_-<br>box.f90 File Reference  | 220 |
| 6.15.1    | Function/Subroutine Documentation                                                       | 221 |
| 6.15.1.1  | allocate_arrays                                                                         | 221 |
| 6.15.1.2  | photo_mbl                                                                               | 221 |
| 6.15.1.3  | photo_strato                                                                            | 221 |
| 6.16      | /home/sander/e2/messy_d2.50s_rs/messy/mbm/caaba/messy_jval_-<br>jvpp.inc File Reference | 222 |
| 6.16.1    | Function/Subroutine Documentation                                                       | 223 |
| 6.16.1.1  | jval_cal                                                                                | 223 |
| 6.16.1.2  | jval_cal_Br2                                                                            | 223 |
| 6.16.1.3  | jval_cal_BrCl                                                                           | 223 |
| 6.16.1.4  | jval_cal_BrNO2                                                                          | 224 |
| 6.16.1.5  | jval_cal_BrNO3                                                                          | 224 |
| 6.16.1.6  | jval_cal_BrO                                                                            | 224 |
| 6.16.1.7  | jval_cal_C3H7I                                                                          | 224 |
| 6.16.1.8  | jval_cal_CCl4                                                                           | 224 |
| 6.16.1.9  | jval_cal_CF2Cl2                                                                         | 224 |
| 6.16.1.10 | jval_cal_CF2ClBr                                                                        | 224 |
| 6.16.1.11 | jval_cal_CF3Br                                                                          | 224 |
| 6.16.1.12 | jval_cal_CFCI3                                                                          | 224 |
| 6.16.1.13 | jval_cal_CH2Br2                                                                         | 224 |
| 6.16.1.14 | jval_cal_CH2ClBr                                                                        | 224 |
| 6.16.1.15 | jval_cal_CH2ClI                                                                         | 224 |
| 6.16.1.16 | jval_cal_CH2I2                                                                          | 224 |
| 6.16.1.17 | jval_cal_CH3Br                                                                          | 224 |
| 6.16.1.18 | jval_cal_CH3CCl3                                                                        | 224 |
| 6.16.1.19 | jval_cal_CH3CHO                                                                         | 224 |
| 6.16.1.20 | jval_cal_CH3Cl                                                                          | 224 |
| 6.16.1.21 | jval_cal_CH3CO3H                                                                        | 224 |
| 6.16.1.22 | jval_cal_CH3COCH3                                                                       | 224 |

|                                       |     |
|---------------------------------------|-----|
| 6.16.1.23 jval_cal_CH3I . . . . .     | 224 |
| 6.16.1.24 jval_cal_CH3NO3 . . . . .   | 224 |
| 6.16.1.25 jval_cal_CH3O2 . . . . .    | 224 |
| 6.16.1.26 jval_cal_CH3O2NO2 . . . . . | 224 |
| 6.16.1.27 jval_cal_CH3ONO . . . . .   | 224 |
| 6.16.1.28 jval_cal_CH3OOH . . . . .   | 225 |
| 6.16.1.29 jval_cal_CH4 . . . . .      | 225 |
| 6.16.1.30 jval_cal_CHBr3 . . . . .    | 225 |
| 6.16.1.31 jval_cal_CHCl2Br . . . . .  | 225 |
| 6.16.1.32 jval_cal_CHClBr2 . . . . .  | 225 |
| 6.16.1.33 jval_cal_CHOH . . . . .     | 225 |
| 6.16.1.34 jval_cal_Cl2 . . . . .      | 225 |
| 6.16.1.35 jval_cal_Cl2O2 . . . . .    | 225 |
| 6.16.1.36 jval_cal_ClNO2 . . . . .    | 225 |
| 6.16.1.37 jval_cal_ClNO3 . . . . .    | 225 |
| 6.16.1.38 jval_cal_ClONO2 . . . . .   | 225 |
| 6.16.1.39 jval_cal_CO2 . . . . .      | 225 |
| 6.16.1.40 jval_cal_COH2 . . . . .     | 225 |
| 6.16.1.41 jval_cal_GLYOX . . . . .    | 225 |
| 6.16.1.42 jval_cal_H2O . . . . .      | 225 |
| 6.16.1.43 jval_cal_H2O2 . . . . .     | 225 |
| 6.16.1.44 jval_cal_H2SO4 . . . . .    | 225 |
| 6.16.1.45 jval_cal_HCl . . . . .      | 225 |
| 6.16.1.46 jval_cal_HCOOH . . . . .    | 225 |
| 6.16.1.47 jval_cal_HNO3 . . . . .     | 225 |
| 6.16.1.48 jval_cal_HNO4 . . . . .     | 225 |
| 6.16.1.49 jval_cal_HOBr . . . . .     | 225 |
| 6.16.1.50 jval_cal_HOCH2CHO . . . . . | 225 |
| 6.16.1.51 jval_cal_HOCl . . . . .     | 225 |
| 6.16.1.52 jval_cal_HOI . . . . .      | 226 |
| 6.16.1.53 jval_cal_HONO . . . . .     | 226 |
| 6.16.1.54 jval_cal_I2 . . . . .       | 226 |
| 6.16.1.55 jval_cal_IBr . . . . .      | 226 |
| 6.16.1.56 jval_cal_ICl . . . . .      | 226 |



|                                                                                                                 |     |
|-----------------------------------------------------------------------------------------------------------------|-----|
| 6.16.1.57 jval_cal_INO2 . . . . .                                                                               | 226 |
| 6.16.1.58 jval_cal_INO3 . . . . .                                                                               | 226 |
| 6.16.1.59 jval_cal_IO . . . . .                                                                                 | 226 |
| 6.16.1.60 jval_cal_MACR . . . . .                                                                               | 226 |
| 6.16.1.61 jval_cal_MGLYOX . . . . .                                                                             | 226 |
| 6.16.1.62 jval_cal_MVK . . . . .                                                                                | 226 |
| 6.16.1.63 jval_cal_N2O . . . . .                                                                                | 226 |
| 6.16.1.64 jval_cal_N2O5 . . . . .                                                                               | 226 |
| 6.16.1.65 jval_cal_NO . . . . .                                                                                 | 226 |
| 6.16.1.66 jval_cal_NO2 . . . . .                                                                                | 226 |
| 6.16.1.67 jval_cal_NO2O . . . . .                                                                               | 226 |
| 6.16.1.68 jval_cal_NOO2 . . . . .                                                                               | 226 |
| 6.16.1.69 jval_cal_O1D . . . . .                                                                                | 226 |
| 6.16.1.70 jval_cal_O2 . . . . .                                                                                 | 226 |
| 6.16.1.71 jval_cal_O3P . . . . .                                                                                | 226 |
| 6.16.1.72 jval_cal_OCIO . . . . .                                                                               | 226 |
| 6.16.1.73 jval_cal_OCS . . . . .                                                                                | 226 |
| 6.16.1.74 jval_cal_PAN . . . . .                                                                                | 226 |
| 6.16.1.75 jval_cal_SF6 . . . . .                                                                                | 226 |
| 6.16.1.76 jval_cal_SO2 . . . . .                                                                                | 227 |
| 6.16.1.77 jval_cal_SO3 . . . . .                                                                                | 227 |
| 6.17 /home/sander/e2/messy_d2.50s_rs/messy/mbm/caaba/messy_main_-<br>blather.f90 File Reference . . . . .       | 227 |
| 6.18 /home/sander/e2/messy_d2.50s_rs/messy/mbm/caaba/messy_main_-<br>constants_mem.f90 File Reference . . . . . | 227 |
| 6.19 /home/sander/e2/messy_d2.50s_rs/messy/mbm/caaba/messy_main_-<br>control_cb.f90 File Reference . . . . .    | 227 |
| 6.20 /home/sander/e2/messy_d2.50s_rs/messy/mbm/caaba/messy_main_-<br>rnd.f90 File Reference . . . . .           | 227 |
| 6.21 /home/sander/e2/messy_d2.50s_rs/messy/mbm/caaba/messy_main_-<br>rnd_lux.f90 File Reference . . . . .       | 227 |
| 6.22 /home/sander/e2/messy_d2.50s_rs/messy/mbm/caaba/messy_main_-<br>rnd_mtw.f90 File Reference . . . . .       | 228 |
| 6.23 /home/sander/e2/messy_d2.50s_rs/messy/mbm/caaba/messy_main_-<br>rnd_mtw_ja.f90 File Reference . . . . .    | 228 |

|           |                                                                                                                 |     |
|-----------|-----------------------------------------------------------------------------------------------------------------|-----|
| 6.24      | /home/sander/e2/messy_d2.50s_rs/messy/mbm/caaba/messy_main_-<br>timer.f90 File Reference . . . . .              | 228 |
| 6.25      | /home/sander/e2/messy_d2.50s_rs/messy/mbm/caaba/messy_main_-<br>tools.f90 File Reference . . . . .              | 229 |
| 6.26      | /home/sander/e2/messy_d2.50s_rs/messy/mbm/caaba/messy_main_-<br>tools_kp4_compress.f90 File Reference . . . . . | 229 |
| 6.27      | /home/sander/e2/messy_d2.50s_rs/messy/mbm/caaba/messy_-<br>mecca.f90 File Reference . . . . .                   | 229 |
| 6.28      | /home/sander/e2/messy_d2.50s_rs/messy/mbm/caaba/messy_mecca-<br>_aero.f90 File Reference . . . . .              | 230 |
| 6.28.1    | Function/Subroutine Documentation . . . . .                                                                     | 230 |
| 6.28.1.1  | mecca_aero_K_tot . . . . .                                                                                      | 230 |
| 6.29      | /home/sander/e2/messy_d2.50s_rs/messy/mbm/caaba/messy_mecca-<br>_box.f90 File Reference . . . . .               | 230 |
| 6.29.1    | Function/Subroutine Documentation . . . . .                                                                     | 231 |
| 6.29.1.1  | aerosol_exchng . . . . .                                                                                        | 231 |
| 6.29.1.2  | check_range . . . . .                                                                                           | 231 |
| 6.29.1.3  | x0_ff_antarctic . . . . .                                                                                       | 231 |
| 6.29.1.4  | x0_ff_arctic . . . . .                                                                                          | 231 |
| 6.29.1.5  | x0_free_trop . . . . .                                                                                          | 231 |
| 6.29.1.6  | x0_hoover . . . . .                                                                                             | 231 |
| 6.29.1.7  | x0_isoo . . . . .                                                                                               | 231 |
| 6.29.1.8  | x0_lab . . . . .                                                                                                | 231 |
| 6.29.1.9  | x0_mbl . . . . .                                                                                                | 231 |
| 6.29.1.10 | x0_mim2 . . . . .                                                                                               | 231 |
| 6.29.1.11 | x0_mtchem . . . . .                                                                                             | 231 |
| 6.29.1.12 | x0_oomph . . . . .                                                                                              | 231 |
| 6.29.1.13 | x0_simple . . . . .                                                                                             | 231 |
| 6.29.1.14 | x0_strato10 . . . . .                                                                                           | 231 |
| 6.29.1.15 | x0_strato20 . . . . .                                                                                           | 231 |
| 6.30      | /home/sander/e2/messy_d2.50s_rs/messy/mbm/caaba/messy_mecca-<br>_dbl_box.f90 File Reference . . . . .           | 231 |
| 6.31      | /home/sander/e2/messy_d2.50s_rs/messy/mbm/caaba/messy_mecca-<br>_dbl_parameters.inc File Reference . . . . .    | 231 |
| 6.32      | /home/sander/e2/messy_d2.50s_rs/messy/mbm/caaba/messy_mecca-<br>_khet.f90 File Reference . . . . .              | 232 |

|                                                                                                                  |     |
|------------------------------------------------------------------------------------------------------------------|-----|
| 6.33 /home/sander/e2/messy_d2.50s_rs/messy/mbm/caaba/messy_mecca-_kpp.f90 File Reference . . . . .               | 232 |
| 6.33.1 Function/Subroutine Documentation . . . . .                                                               | 232 |
| 6.33.1.1 kpp_read_nml_ctrl . . . . .                                                                             | 232 |
| 6.33.1.2 montecarlo_check . . . . .                                                                              | 232 |
| 6.34 /home/sander/e2/messy_d2.50s_rs/messy/mbm/caaba/messy_mecca-_kpp_function.f90 File Reference . . . . .      | 232 |
| 6.35 /home/sander/e2/messy_d2.50s_rs/messy/mbm/caaba/messy_mecca-_kpp_global.f90 File Reference . . . . .        | 232 |
| 6.36 /home/sander/e2/messy_d2.50s_rs/messy/mbm/caaba/messy_mecca-_kpp_initialize.f90 File Reference . . . . .    | 233 |
| 6.37 /home/sander/e2/messy_d2.50s_rs/messy/mbm/caaba/messy_mecca-_kpp_integrator.f90 File Reference . . . . .    | 233 |
| 6.37.1 Function/Subroutine Documentation . . . . .                                                               | 233 |
| 6.37.1.1 Rodas3 . . . . .                                                                                        | 233 |
| 6.37.1.2 Rodas4 . . . . .                                                                                        | 233 |
| 6.37.1.3 Ros2 . . . . .                                                                                          | 233 |
| 6.37.1.4 Ros3 . . . . .                                                                                          | 233 |
| 6.37.1.5 Ros4 . . . . .                                                                                          | 233 |
| 6.37.1.6 ros_Decomp . . . . .                                                                                    | 233 |
| 6.37.1.7 ros_ErrorMsg . . . . .                                                                                  | 234 |
| 6.37.1.8 ros_ErrorNorm . . . . .                                                                                 | 234 |
| 6.37.1.9 ros_FunTimeDerivative . . . . .                                                                         | 234 |
| 6.37.1.10 ros_Integrator . . . . .                                                                               | 234 |
| 6.37.1.11 ros_PrepareMatrix . . . . .                                                                            | 235 |
| 6.37.1.12 ros_Solve . . . . .                                                                                    | 235 |
| 6.38 /home/sander/e2/messy_d2.50s_rs/messy/mbm/caaba/messy_mecca-_kpp_jacobian.f90 File Reference . . . . .      | 235 |
| 6.39 /home/sander/e2/messy_d2.50s_rs/messy/mbm/caaba/messy_mecca-_kpp_jacobiansp.f90 File Reference . . . . .    | 235 |
| 6.40 /home/sander/e2/messy_d2.50s_rs/messy/mbm/caaba/messy_mecca-_kpp_linearalgebra.f90 File Reference . . . . . | 235 |
| 6.41 /home/sander/e2/messy_d2.50s_rs/messy/mbm/caaba/messy_mecca-_kpp_monitor.f90 File Reference . . . . .       | 236 |
| 6.42 /home/sander/e2/messy_d2.50s_rs/messy/mbm/caaba/messy_mecca-_kpp_parameters.f90 File Reference . . . . .    | 236 |

|          |                                                                                                              |     |
|----------|--------------------------------------------------------------------------------------------------------------|-----|
| 6.43     | /home/sander/e2/messy_d2.50s_rs/messy/mbm/caaba/messy_mecca_<br>_kpp_precision.f90 File Reference . . . . .  | 236 |
| 6.44     | /home/sander/e2/messy_d2.50s_rs/messy/mbm/caaba/messy_mecca_<br>_kpp_rates.f90 File Reference . . . . .      | 236 |
| 6.45     | /home/sander/e2/messy_d2.50s_rs/messy/mbm/caaba/messy_mecca_<br>_kpp_util.f90 File Reference . . . . .       | 236 |
| 6.46     | /home/sander/e2/messy_d2.50s_rs/messy/mbm/caaba/messy_mecca_<br>_tag_box.f90 File Reference . . . . .        | 236 |
| 6.47     | /home/sander/e2/messy_d2.50s_rs/messy/mbm/caaba/messy_mecca_<br>_tag_parameters.inc File Reference . . . . . | 237 |
| 6.48     | /home/sander/e2/messy_d2.50s_rs/messy/mbm/caaba/messy_<br>radjimt.f90 File Reference . . . . .               | 237 |
| 6.49     | /home/sander/e2/messy_d2.50s_rs/messy/mbm/caaba/messy_radjimt_<br>_box.f90 File Reference . . . . .          | 237 |
| 6.49.1   | Function/Subroutine Documentation . . . . .                                                                  | 237 |
| 6.49.1.1 | allocate_arrays . . . . .                                                                                    | 237 |
| 6.49.1.2 | photo_mtchem . . . . .                                                                                       | 238 |
| 6.50     | /home/sander/e2/messy_d2.50s_rs/messy/mbm/caaba/messy_<br>readj.f90 File Reference . . . . .                 | 238 |
| 6.51     | /home/sander/e2/messy_d2.50s_rs/messy/mbm/caaba/messy_readj_<br>box.f90 File Reference . . . . .             | 238 |
| 6.52     | /home/sander/e2/messy_d2.50s_rs/messy/mbm/caaba/messy_<br>sappho.f90 File Reference . . . . .                | 238 |
| 6.52.1   | Function/Subroutine Documentation . . . . .                                                                  | 239 |
| 6.52.1.1 | photo_ff . . . . .                                                                                           | 239 |
| 6.52.1.2 | photo_lab . . . . .                                                                                          | 239 |
| 6.52.1.3 | photo_mbl . . . . .                                                                                          | 239 |
| 6.53     | /home/sander/e2/messy_d2.50s_rs/messy/mbm/caaba/messy_<br>sappho_box.f90 File Reference . . . . .            | 239 |
| 6.54     | /home/sander/e2/messy_d2.50s_rs/messy/mbm/caaba/messy_<br>semidep_box.f90 File Reference . . . . .           | 239 |
| 6.54.1   | Function/Subroutine Documentation . . . . .                                                                  | 239 |
| 6.54.1.1 | drydep_default . . . . .                                                                                     | 239 |
| 6.54.1.2 | drydep_ff . . . . .                                                                                          | 239 |
| 6.54.1.3 | drydep_lab . . . . .                                                                                         | 240 |
| 6.54.1.4 | drydep_mbl . . . . .                                                                                         | 240 |
| 6.54.1.5 | drydep_mim2 . . . . .                                                                                        | 240 |
| 6.54.1.6 | emission_default . . . . .                                                                                   | 240 |

---

|           |                                                                                                     |     |
|-----------|-----------------------------------------------------------------------------------------------------|-----|
| 6.54.1.7  | emission_ff . . . . .                                                                               | 240 |
| 6.54.1.8  | emission_isoo . . . . .                                                                             | 240 |
| 6.54.1.9  | emission_lab . . . . .                                                                              | 240 |
| 6.54.1.10 | emission_mbl . . . . .                                                                              | 240 |
| 6.54.1.11 | emission_mim2 . . . . .                                                                             | 240 |
| 6.54.1.12 | emission_oomph . . . . .                                                                            | 240 |
| 6.55      | /home/sander/e2/messy_d2.50s_rs/messy/mbm/caaba/messy_traject-<br>_box.f90 File Reference . . . . . | 240 |
| 6.56      | /home/sander/e2/messy_d2.50s_rs/messy/mbm/caaba/radjimt.nml File<br>Reference . . . . .             | 240 |



## Chapter 1

### Introduction

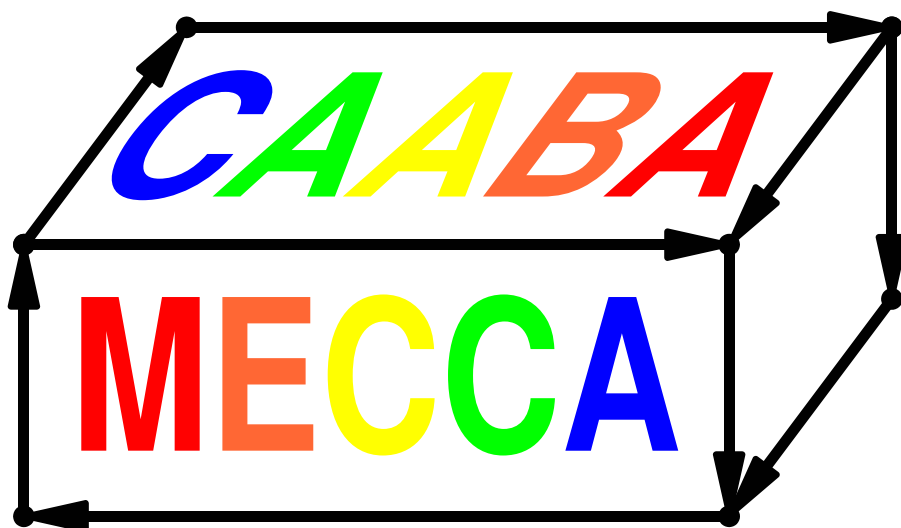

CAABA is a box model that uses MECCA chemistry, plus simplified calculations for emission, deposition, and photolysis. For more information, see [\[1\]](#)





## Chapter 2

## Todo List

Type [caaba\\_module](#)  
see TODO file.



## Chapter 3

# Data Type Index

### 3.1 Data Types List

Here are the data types with brief descriptions:

|                                                               |    |
|---------------------------------------------------------------|----|
| <a href="#">messy_main_rnd_mtw_ja::add</a>                    | 13 |
| <a href="#">messy_main_rnd_mtw_ja::add_assign</a>             | 13 |
| <a href="#">messy_main_rnd_mtw_ja::assign</a>                 | 14 |
| <a href="#">caaba_io</a>                                      | 14 |
| <a href="#">caaba_mem</a>                                     | 14 |
| <a href="#">caaba_module</a>                                  |    |
| CAABA = Chemistry As A Boxmodel Application                   | 20 |
| <a href="#">messy_main_rnd_mtw_ja::delete</a>                 | 21 |
| <a href="#">messy_main_rnd_mtw_ja::div</a>                    | 21 |
| <a href="#">messy_main_rnd_mtw_ja::div_by_x</a>               | 22 |
| <a href="#">messy_main_rnd_mtw_ja::divrem</a>                 | 22 |
| <a href="#">messy_cmn_gasaq::GASQAQ_TYPE</a>                  | 23 |
| <a href="#">messy_main_rnd_mtw_ja::gf2x_obj</a>               | 23 |
| <a href="#">messy_main_rnd_mtw_ja::gf2x_prime_obj</a>         | 24 |
| <a href="#">messy_main_tools::ind2val</a>                     | 25 |
| <a href="#">messy_main_tools::iso2ind</a>                     | 25 |
| <a href="#">messy_main_tools_kp4_compress::kco_compress</a>   | 26 |
| <a href="#">messy_main_tools_kp4_compress::kco_finalize</a>   | 26 |
| <a href="#">messy_main_tools_kp4_compress::kco_initialize</a> | 27 |
| <a href="#">messy_cmn_gasaq</a>                               | 28 |
| <a href="#">messy_cmn_photol_mem</a>                          | 31 |
| <a href="#">messy_e4chem</a>                                  | 39 |
| <a href="#">messy_e4chem_box</a>                              | 44 |
| <a href="#">messy_jval</a>                                    | 47 |
| <a href="#">messy_jval_box</a>                                | 53 |
| <a href="#">messy_main_blather</a>                            | 55 |
| <a href="#">messy_main_constants_mem</a>                      | 56 |
| <a href="#">messy_main_control_cb</a>                         | 63 |
| <a href="#">messy_main_rnd</a>                                | 63 |

|                                    |     |
|------------------------------------|-----|
| messy_main_rnd_lux                 | 66  |
| messy_main_rnd_mtw                 | 68  |
| messy_main_rnd_mtw_ja              | 71  |
| messy_main_timer                   | 78  |
| messy_main_tools                   | 87  |
| messy_main_tools_kp4_compress      | 94  |
| messy_mecca                        | 96  |
| messy_mecca_aero                   | 97  |
| messy_mecca_box                    | 99  |
| messy_mecca_dbl_box                | 103 |
| messy_mecca_khet                   | 104 |
| messy_mecca_kpp                    | 105 |
| messy_mecca_kpp_Function           | 108 |
| messy_mecca_kpp_Global             | 109 |
| messy_mecca_kpp_Initialize         | 130 |
| messy_mecca_kpp_Integrator         | 130 |
| messy_mecca_kpp_Jacobian           | 132 |
| messy_mecca_kpp_JacobianSP         | 133 |
| messy_mecca_kpp_LinearAlgebra      | 136 |
| messy_mecca_kpp_Monitor            | 138 |
| messy_mecca_kpp_Parameters         | 142 |
| messy_mecca_kpp_Precision          | 178 |
| messy_mecca_kpp_Rates              | 179 |
| messy_mecca_kpp_Util               | 181 |
| messy_mecca_tag_box                | 182 |
| messy_radjimt                      | 183 |
| messy_radjimt_box                  | 190 |
| messy_readj                        | 192 |
| messy_readj_box                    | 193 |
| messy_sappho                       | 193 |
| messy_sappho_box                   | 194 |
| messy_semidep_box                  | 195 |
| messy_traject_box                  | 197 |
| messy_main_rnd_mtw_ja::mod_by_x    | 200 |
| messy_main_rnd_mtw_ja::mult        | 201 |
| messy_main_rnd_mtw_ja::mult_assign | 201 |
| messy_main_rnd_mtw_ja::mult_by_x   | 202 |
| messy_main_rnd_mtw_ja::new         | 202 |
| messy_main_rnd_mtw_ja::pow         | 202 |
| messy_main_rnd_mtw_ja::print_bit   | 203 |
| messy_main_rnd_mtw_ja::print_hex   | 203 |
| messy_main_tools::PTR_0D_ARRAY     | 204 |
| messy_main_tools::PTR_1D_ARRAY     | 204 |
| messy_main_tools::PTR_1D_ARRAY_INT | 204 |
| messy_main_tools::PTR_2D_ARRAY     | 205 |
| messy_main_tools::PTR_3D_ARRAY     | 205 |
| messy_main_tools::PTR_4D_ARRAY     | 205 |
| messy_main_tools::PTR_5D_ARRAY     | 206 |
| messy_main_rnd_mtw_ja::rem         | 206 |
| messy_main_tools::remap_bounds     | 207 |

|                                  |     |
|----------------------------------|-----|
| messy_main_rnd::rnd_jump         | 207 |
| messy_main_rnd_mtw_ja::set_coef  | 208 |
| messy_main_rnd_mtw_ja::set_prime | 208 |
| messy_main_rnd_mtw_ja::shift     | 209 |
| messy_main_rnd_mtw_ja::square    | 209 |
| messy_main_tools::str            | 210 |
| messy_main_tools::str2num        | 210 |
| messy_main_tools::t_reset_par    | 211 |
| messy_main_timer::time_days      | 211 |
| messy_main_timer::timer_get_date | 212 |
| messy_main_timer::timer_set_date | 212 |



## Chapter 4

# File Index

### 4.1 File List

Here is a list of all files with brief descriptions:

|                                                                                             |     |
|---------------------------------------------------------------------------------------------|-----|
| /home/sander/e2/messy_d2.50s_rs/messy/mbm/caaba/caaba.f90 . . . . .                         | 215 |
| /home/sander/e2/messy_d2.50s_rs/messy/mbm/caaba/caaba.nml . . . . .                         | 215 |
| /home/sander/e2/messy_d2.50s_rs/messy/mbm/caaba/caaba_io.f90 . . . . .                      | 215 |
| /home/sander/e2/messy_d2.50s_rs/messy/mbm/caaba/caaba_io_ascii.inc . .                      | 216 |
| /home/sander/e2/messy_d2.50s_rs/messy/mbm/caaba/caaba_io_netcdf.inc .                       | 216 |
| /home/sander/e2/messy_d2.50s_rs/messy/mbm/caaba/caaba_mem.f90 . . .                         | 216 |
| /home/sander/e2/messy_d2.50s_rs/messy/mbm/caaba/e4chem.nml . . . . .                        | 216 |
| /home/sander/e2/messy_d2.50s_rs/messy/mbm/caaba/jval.nml . . . . .                          | 216 |
| /home/sander/e2/messy_d2.50s_rs/messy/mbm/caaba/mecca.nml . . . . .                         | 216 |
| /home/sander/e2/messy_d2.50s_rs/messy/mbm/caaba/messy_cmn_gasaq-<br>f90 . . . . .           | 216 |
| /home/sander/e2/messy_d2.50s_rs/messy/mbm/caaba/messy_cmn_photol_-<br>mem.f90 . . . . .     | 217 |
| /home/sander/e2/messy_d2.50s_rs/messy/mbm/caaba/messy_e4chem.f90 .                          | 217 |
| /home/sander/e2/messy_d2.50s_rs/messy/mbm/caaba/messy_e4chem_-<br>box.f90 . . . . .         | 218 |
| /home/sander/e2/messy_d2.50s_rs/messy/mbm/caaba/messy_jval.f90 . . . .                      | 219 |
| /home/sander/e2/messy_d2.50s_rs/messy/mbm/caaba/messy_jval_box.f90 .                        | 220 |
| /home/sander/e2/messy_d2.50s_rs/messy/mbm/caaba/messy_jval_jvpp.inc .                       | 222 |
| /home/sander/e2/messy_d2.50s_rs/messy/mbm/caaba/messy_main_-<br>blather.f90 . . . . .       | 227 |
| /home/sander/e2/messy_d2.50s_rs/messy/mbm/caaba/messy_main_-<br>constants_mem.f90 . . . . . | 227 |
| /home/sander/e2/messy_d2.50s_rs/messy/mbm/caaba/messy_main_control-<br>_cb.f90 . . . . .    | 227 |
| /home/sander/e2/messy_d2.50s_rs/messy/mbm/caaba/messy_main_rnd.f90 .                        | 227 |
| /home/sander/e2/messy_d2.50s_rs/messy/mbm/caaba/messy_main_rnd_-<br>lux.f90 . . . . .       | 227 |

|                                                                                        |     |
|----------------------------------------------------------------------------------------|-----|
| /home/sander/e2/messy_d2.50s_rs/messy/mbm/caaba/messy_main_rnd_-<br>mtw.f90            | 228 |
| /home/sander/e2/messy_d2.50s_rs/messy/mbm/caaba/messy_main_rnd_-<br>mtw_ja.f90         | 228 |
| /home/sander/e2/messy_d2.50s_rs/messy/mbm/caaba/messy_main_timer.-<br>f90              | 228 |
| /home/sander/e2/messy_d2.50s_rs/messy/mbm/caaba/messy_main_tools.-<br>f90              | 229 |
| /home/sander/e2/messy_d2.50s_rs/messy/mbm/caaba/messy_main_tools_-<br>kp4_compress.f90 | 229 |
| /home/sander/e2/messy_d2.50s_rs/messy/mbm/caaba/messy_mecca.f90                        | 229 |
| /home/sander/e2/messy_d2.50s_rs/messy/mbm/caaba/messy_mecca_aero.-<br>f90              | 230 |
| /home/sander/e2/messy_d2.50s_rs/messy/mbm/caaba/messy_mecca_box.-<br>f90               | 230 |
| /home/sander/e2/messy_d2.50s_rs/messy/mbm/caaba/messy_mecca_dbl_-<br>box.f90           | 231 |
| /home/sander/e2/messy_d2.50s_rs/messy/mbm/caaba/messy_mecca_dbl_-<br>parameters.inc    | 231 |
| /home/sander/e2/messy_d2.50s_rs/messy/mbm/caaba/messy_mecca_khet.-<br>f90              | 232 |
| /home/sander/e2/messy_d2.50s_rs/messy/mbm/caaba/messy_mecca_kpp.-<br>f90               | 232 |
| /home/sander/e2/messy_d2.50s_rs/messy/mbm/caaba/messy_mecca_kpp_-<br>function.f90      | 232 |
| /home/sander/e2/messy_d2.50s_rs/messy/mbm/caaba/messy_mecca_kpp_-<br>global.f90        | 232 |
| /home/sander/e2/messy_d2.50s_rs/messy/mbm/caaba/messy_mecca_kpp_-<br>initialize.f90    | 233 |
| /home/sander/e2/messy_d2.50s_rs/messy/mbm/caaba/messy_mecca_kpp_-<br>integrator.f90    | 233 |
| /home/sander/e2/messy_d2.50s_rs/messy/mbm/caaba/messy_mecca_kpp_-<br>jacobian.f90      | 235 |
| /home/sander/e2/messy_d2.50s_rs/messy/mbm/caaba/messy_mecca_kpp_-<br>jacobiansp.f90    | 235 |
| /home/sander/e2/messy_d2.50s_rs/messy/mbm/caaba/messy_mecca_kpp_-<br>linearalgebra.f90 | 235 |
| /home/sander/e2/messy_d2.50s_rs/messy/mbm/caaba/messy_mecca_kpp_-<br>monitor.f90       | 236 |
| /home/sander/e2/messy_d2.50s_rs/messy/mbm/caaba/messy_mecca_kpp_-<br>parameters.f90    | 236 |
| /home/sander/e2/messy_d2.50s_rs/messy/mbm/caaba/messy_mecca_kpp_-<br>precision.f90     | 236 |
| /home/sander/e2/messy_d2.50s_rs/messy/mbm/caaba/messy_mecca_kpp_-<br>rates.f90         | 236 |
| /home/sander/e2/messy_d2.50s_rs/messy/mbm/caaba/messy_mecca_kpp_-<br>util.f90          | 236 |
| /home/sander/e2/messy_d2.50s_rs/messy/mbm/caaba/messy_mecca_tag_-<br>box.f90           | 236 |



|                                                                                               |     |
|-----------------------------------------------------------------------------------------------|-----|
| /home/sander/e2/messy_d2.50s_rs/messy/mbm/caaba/messy_mecca_tag_-<br>parameters.inc . . . . . | 237 |
| /home/sander/e2/messy_d2.50s_rs/messy/mbm/caaba/messy_radjimt.f90 . .                         | 237 |
| /home/sander/e2/messy_d2.50s_rs/messy/mbm/caaba/messy_radjimt_box.-<br>f90 . . . . .          | 237 |
| /home/sander/e2/messy_d2.50s_rs/messy/mbm/caaba/messy_readj.f90 . . .                         | 238 |
| /home/sander/e2/messy_d2.50s_rs/messy/mbm/caaba/messy_readj_box.f90                           | 238 |
| /home/sander/e2/messy_d2.50s_rs/messy/mbm/caaba/messy_sappho.f90 . .                          | 238 |
| /home/sander/e2/messy_d2.50s_rs/messy/mbm/caaba/messy_sappho_box.-<br>f90 . . . . .           | 239 |
| /home/sander/e2/messy_d2.50s_rs/messy/mbm/caaba/messy_semidep_-<br>box.f90 . . . . .          | 239 |
| /home/sander/e2/messy_d2.50s_rs/messy/mbm/caaba/messy_traject_box.-<br>f90 . . . . .          | 240 |
| /home/sander/e2/messy_d2.50s_rs/messy/mbm/caaba/radjimt.nml . . . . .                         | 240 |



## Chapter 5

# Data Type Documentation

### 5.1 messy\_main\_rnd\_mtw\_ja::add Interface Reference

#### Private Member Functions

- subroutine [gf2x\\_add](#) (c, a, b)

#### 5.1.1 Member Function/Subroutine Documentation

5.1.1.1 subroutine messy\_main\_rnd\_mtw\_ja::add::gf2x\_add ( type(gf2x\_obj),  
intent(inout) c, type(gf2x\_obj), intent(in) a, type(gf2x\_obj), intent(in) b )  
[private]

The documentation for this interface was generated from the following file:

- [/home/sander/e2/messy\\_d2.50s\\_rs/messy/mbm/caaba/messy\\_main\\_rnd\\_mtw\\_ja.f90](#)

### 5.2 messy\_main\_rnd\_mtw\_ja::add\_assign Interface Reference

#### Private Member Functions

- subroutine [gf2x\\_add\\_assign](#) (c, a)

#### 5.2.1 Member Function/Subroutine Documentation

5.2.1.1 subroutine messy\_main\_rnd\_mtw\_ja::add\_assign::gf2x\_add\_assign (  
type(gf2x\_obj), intent(inout) c, type(gf2x\_obj), intent(in) a ) [private]

The documentation for this interface was generated from the following file:

- [/home/sander/e2/messy\\_d2.50s\\_rs/messy/mbm/caaba/messy\\_main\\_rnd\\_mtw\\_ - ja.f90](#)

### 5.3 messy\_main\_rnd\_mtw\_ja::assign Interface Reference

#### Private Member Functions

- subroutine [gf2x\\_assign](#) (c, a)

#### 5.3.1 Member Function/Subroutine Documentation

- 5.3.1.1 subroutine `messy_main_rnd_mtw_ja::assign::gf2x_assign ( type(gf2x_obj), intent(inout) c, type(gf2x_obj), intent(in) a ) [private]`

The documentation for this interface was generated from the following file:

- [/home/sander/e2/messy\\_d2.50s\\_rs/messy/mbm/caaba/messy\\_main\\_rnd\\_mtw\\_ - ja.f90](#)

### 5.4 caaba\_io Module Reference

The documentation for this module was generated from the following file:

- [/home/sander/e2/messy\\_d2.50s\\_rs/messy/mbm/caaba/caaba\\_io.f90](#)

### 5.5 caaba\_mem Module Reference

#### Public Attributes

- CHARACTER(LEN=STRLEN\_MEDIUM) [caaba\\_version](#) = "
- LOGICAL [USE\\_JVAL](#) = .FALSE.
- LOGICAL [USE\\_MECCA](#) = .FALSE.
- LOGICAL [USE\\_RADJIMT](#) = .FALSE.
- LOGICAL [USE\\_READJ](#) = .FALSE.
- LOGICAL [USE\\_SAPPHO](#) = .FALSE.
- LOGICAL [USE\\_SEMIDEP](#) = .FALSE.
- LOGICAL [USE\\_TRAJECT](#) = .FALSE.
- LOGICAL [USE\\_E4CHEM](#) = .FALSE.
- LOGICAL [I\\_ff](#) = .FALSE.
- LOGICAL [I\\_skipkpp](#) = .FALSE.
- LOGICAL [I\\_steady\\_state\\_stop](#) = .FALSE.
- LOGICAL [I\\_injectNOx](#) = .FALSE.

- LOGICAL `l_spechum` = .FALSE.
- LOGICAL `l_RRconc` = .FALSE.
- REAL(DP) `degree_lat` = 45.\_DP
- REAL(DP) `degree_lon` = 0.\_DP
- REAL(DP) `model_start_day` = 80.\_DP
- REAL(DP) `Ca_precip` = 0.\_DP
- REAL(DP) `t_NOxon` = -1.\_DP
- REAL(DP) `t_NOxoff` = -1.\_DP
- REAL(DP) `runlast` = -1.\_DP
- CHARACTER(LEN=12) `init_scenario` = "
- CHARACTER(LEN=12) `photo_scenario` = "
- CHARACTER(LEN=12) `emission_scenario` = "
- CHARACTER(LEN=12) `drydep_scenario` = "
- CHARACTER(LEN=STRLEN\_VLONG) `runtime_str` = "
- CHARACTER(LEN=STRLEN\_VLONG) `timesteplen_str` = "
- CHARACTER(LEN=STRLEN\_ULONG) `init_spec` = "
- CHARACTER(LEN=STRLEN\_ULONG) `init_j` = "
- INTEGER `init_j_index` = 1
- CHARACTER(LEN=STRLEN\_MEDIUM) `photrat_channel` = "
- CHARACTER(LEN=STRLEN\_ULONG) `input_physc` = "
- CHARACTER(LEN=STRLEN\_ULONG) `input_jval` = "
- CHARACTER(LEN=STRLEN\_VLONG) `vlat` = 'LAT'
- CHARACTER(LEN=STRLEN\_VLONG) `vlon` = 'LON'
- CHARACTER(LEN=STRLEN\_VLONG) `vpress` = 'PRESS'
- CHARACTER(LEN=STRLEN\_VLONG) `vtemp` = 'TEMP'
- CHARACTER(LEN=STRLEN\_VLONG) `vrelhum` = "
- CHARACTER(LEN=STRLEN\_VLONG) `vspechum` = "
- CHARACTER(LEN=STRLEN\_VLONG) `vtime` = 'TIME'
- LOGICAL `l_ignore_relhum` = .FALSE.
- LOGICAL `l_relhum_wmo` = .FALSE.
- LOGICAL `l_psat_emac` = .FALSE.
- LOGICAL `l_runtime_str` = .FALSE.
- INTEGER `t0year`
- INTEGER `t0month`
- INTEGER `t0day`
- INTEGER `t0hour`
- INTEGER `t0min`
- INTEGER `t0sec`
- REAL(DP) `model_time`
- REAL(DP) `model_start`
- REAL(DP) `model_end`
- REAL(DP) `percent_done` = 0.\_DP
- REAL(DP) `time0_jul` = 0.\_DP
- REAL(DP) `firstjan_jul` = 0.\_DP
- REAL(DP) `timesteplen`
- REAL(DP) `tuf` = 1.\_DP

- REAL(DP) `runtime` = -1.\_DP
- CHARACTER(LEN=33) `time_string` = 'seconds since 2000-01-01 00:00:00'
- LOGICAL `l_input_jval` = .FALSE.
- INTEGER `lyear`
- INTEGER `lmonth`
- INTEGER `lday`
- INTEGER `lhour`
- INTEGER `lmin`
- INTEGER `lsec`
- REAL(DP) `localtime` = 0.\_DP
- REAL(DP) `cosssa` = 1.\_DP
- REAL(DP) `degree_sza`
- REAL(DP) `x_j_no2`
- INTEGER `jval_clev`
- REAL(DP), dimension(:), allocatable `c`
- REAL(DP) `cair`
- REAL(DP) `temp` = 293.\_DP
- REAL(DP) `press` = 101325.\_DP
- REAL(DP) `relhum` = 0.81.\_DP
- REAL(DP) `specum`
- REAL(DP) `zmbi` = 1000.\_DP
- REAL(DP) `zmix` = 25.\_DP

### 5.5.1 Member Data Documentation

5.5.1.1 REAL(DP), dimension(:), allocatable `caaba_mem::c`

5.5.1.2 REAL(DP) `caaba_mem::Ca_precip` = 0.\_DP

5.5.1.3 CHARACTER(LEN=STRLEN\_MEDIUM) `caaba_mem::caaba_version` = "

5.5.1.4 REAL(DP) `caaba_mem::cair`

5.5.1.5 REAL(DP) `caaba_mem::cosssa` = 1.\_DP

5.5.1.6 REAL(DP) `caaba_mem::degree_lat` = 45.\_DP

5.5.1.7 REAL(DP) `caaba_mem::degree_lon` = 0.\_DP

5.5.1.8 REAL(DP) `caaba_mem::degree_sza`

5.5.1.9 CHARACTER(LEN=12) `caaba_mem::drydep_scenario` = "

5.5.1.10 CHARACTER(LEN=12) `caaba_mem::emission_scenario` = "

5.5.1.11 REAL(DP) `caaba_mem::firstjan_jul` = 0.\_DP

- 5.5.1.12 CHARACTER(LEN=STRLEN\_ULONG) caaba\_mem::init\_j = "
- 5.5.1.13 INTEGER caaba\_mem::init\_j\_index = 1
- 5.5.1.14 CHARACTER(LEN=12) caaba\_mem::init\_scenario = "
- 5.5.1.15 CHARACTER(LEN=STRLEN\_ULONG) caaba\_mem::init\_spec = "
- 5.5.1.16 CHARACTER(LEN=STRLEN\_ULONG) caaba\_mem::input\_jval = "
- 5.5.1.17 CHARACTER(LEN=STRLEN\_ULONG) caaba\_mem::input\_physc = "
- 5.5.1.18 INTEGER caaba\_mem::jval\_clev
- 5.5.1.19 LOGICAL caaba\_mem::l\_ff = .FALSE.
- 5.5.1.20 LOGICAL caaba\_mem::l\_ignore\_relhum = .FALSE.
- 5.5.1.21 LOGICAL caaba\_mem::l\_injectNOx = .FALSE.
- 5.5.1.22 LOGICAL caaba\_mem::l\_input\_jval = .FALSE.
- 5.5.1.23 LOGICAL caaba\_mem::l\_psat\_emac = .FALSE.
- 5.5.1.24 LOGICAL caaba\_mem::l\_relhum\_wmo = .FALSE.
- 5.5.1.25 LOGICAL caaba\_mem::l\_RRconc = .FALSE.
- 5.5.1.26 LOGICAL caaba\_mem::l\_runtime\_str = .FALSE.
- 5.5.1.27 LOGICAL caaba\_mem::l\_skipkpp = .FALSE.
- 5.5.1.28 LOGICAL caaba\_mem::l\_spechum = .FALSE.
- 5.5.1.29 LOGICAL caaba\_mem::l\_steady\_state\_stop = .FALSE.
- 5.5.1.30 INTEGER caaba\_mem::lday
- 5.5.1.31 INTEGER caaba\_mem::lhour
- 5.5.1.32 INTEGER caaba\_mem::lmin
- 5.5.1.33 INTEGER caaba\_mem::lmonth
- 5.5.1.34 REAL(DP) caaba\_mem::localtime = 0.\_DP
- 5.5.1.35 INTEGER caaba\_mem::lsec

- 5.5.1.36 INTEGER caaba\_mem::lyear
- 5.5.1.37 REAL(DP) caaba\_mem::model\_end
- 5.5.1.38 REAL(DP) caaba\_mem::model\_start
- 5.5.1.39 REAL(DP) caaba\_mem::model\_start\_day = 80.\_DP
- 5.5.1.40 REAL(DP) caaba\_mem::model\_time
- 5.5.1.41 REAL(DP) caaba\_mem::percent\_done = 0.\_DP
- 5.5.1.42 CHARACTER(LEN=12) caaba\_mem::photo\_scenario = "
- 5.5.1.43 CHARACTER(LEN=STRLEN\_MEDIUM) caaba\_mem::photrat\_channel = "
- 5.5.1.44 REAL(DP) caaba\_mem::press = 101325.\_DP
- 5.5.1.45 REAL(DP) caaba\_mem::relhum = 0.81.\_DP
- 5.5.1.46 REAL(DP) caaba\_mem::runlast = -1.\_DP
- 5.5.1.47 REAL(DP) caaba\_mem::runtime = -1.\_DP
- 5.5.1.48 CHARACTER(LEN=STRLEN\_VLONG) caaba\_mem::runtime\_str = "
- 5.5.1.49 REAL(DP) caaba\_mem::spechum
- 5.5.1.50 INTEGER caaba\_mem::t0day
- 5.5.1.51 INTEGER caaba\_mem::t0hour
- 5.5.1.52 INTEGER caaba\_mem::t0min
- 5.5.1.53 INTEGER caaba\_mem::t0month
- 5.5.1.54 INTEGER caaba\_mem::t0sec
- 5.5.1.55 INTEGER caaba\_mem::t0year
- 5.5.1.56 REAL(DP) caaba\_mem::t\_NOxoff = -1.\_DP
- 5.5.1.57 REAL(DP) caaba\_mem::t\_NOxon = -1.\_DP
- 5.5.1.58 REAL(DP) caaba\_mem::temp = 293.\_DP
- 5.5.1.59 REAL(DP) caaba\_mem::time0\_jul = 0.\_DP



- 5.5.1.60 CHARACTER(LEN=33) caaba\_mem::time\_string = 'seconds since 2000-01-01 00:00:00'
- 5.5.1.61 REAL(DP) caaba\_mem::timesteplen
- 5.5.1.62 CHARACTER(LEN=STRLEN\_VLONG) caaba\_mem::timesteplen\_str = "
- 5.5.1.63 REAL(DP) caaba\_mem::tuf = 1.\_DP
- 5.5.1.64 LOGICAL caaba\_mem::USE\_E4CHEM = .FALSE.
- 5.5.1.65 LOGICAL caaba\_mem::USE\_JVAL = .FALSE.
- 5.5.1.66 LOGICAL caaba\_mem::USE\_MECCA = .FALSE.
- 5.5.1.67 LOGICAL caaba\_mem::USE\_RADJIMT = .FALSE.
- 5.5.1.68 LOGICAL caaba\_mem::USE\_READJ = .FALSE.
- 5.5.1.69 LOGICAL caaba\_mem::USE\_SAPPHO = .FALSE.
- 5.5.1.70 LOGICAL caaba\_mem::USE\_SEMIDEP = .FALSE.
- 5.5.1.71 LOGICAL caaba\_mem::USE\_TRAJECT = .FALSE.
- 5.5.1.72 CHARACTER(LEN=STRLEN\_VLONG) caaba\_mem::vlat = 'LAT'
- 5.5.1.73 CHARACTER(LEN=STRLEN\_VLONG) caaba\_mem::vlon = 'LON'
- 5.5.1.74 CHARACTER(LEN=STRLEN\_VLONG) caaba\_mem::vpress = 'PRESS'
- 5.5.1.75 CHARACTER(LEN=STRLEN\_VLONG) caaba\_mem::vrelhum = "
- 5.5.1.76 CHARACTER(LEN=STRLEN\_VLONG) caaba\_mem::vspechum = "
- 5.5.1.77 CHARACTER(LEN=STRLEN\_VLONG) caaba\_mem::vtemp = 'TEMP'
- 5.5.1.78 CHARACTER(LEN=STRLEN\_VLONG) caaba\_mem::vtime = 'TIME'
- 5.5.1.79 REAL(DP) caaba\_mem::x\_j\_no2
- 5.5.1.80 REAL(DP) caaba\_mem::zmbi = 1000.\_DP
- 5.5.1.81 REAL(DP) caaba\_mem::zmix = 25.\_DP

The documentation for this module was generated from the following file:

- /home/sander/e2/messy\_d2.50s\_rs/messy/mbm/caaba/[caaba\\_mem.f90](#)

## 5.6 caaba\_module Module Reference

CAABA = Chemistry As A Boxmodel Application.

### Public Member Functions

- subroutine [caaba\\_read\\_nml](#) (status, iou)  
*Read CTRL namelist.*
- subroutine [calc\\_sza](#)
- subroutine [caaba\\_result](#)
- subroutine [caaba\\_init](#)
- subroutine [caaba\\_physc](#)
- subroutine [caaba\\_finish](#)

### Public Attributes

- CHARACTER(LEN=\*), parameter [modstr](#) = 'caaba'
- INTEGER [ncid\\_messy](#)

### 5.6.1 Detailed Description

#### Authors

Rolf Sander, MPICH, Mainz, 2003-2015  
Hella Riede, MPICH, Mainz, 2007

**Todo** see TODO file.

### 5.6.2 Member Function/Subroutine Documentation

5.6.2.1 subroutine [caaba\\_module::caaba\\_finish](#) ( )

5.6.2.2 subroutine [caaba\\_module::caaba\\_init](#) ( )

5.6.2.3 subroutine [caaba\\_module::caaba\\_physc](#) ( )

5.6.2.4 subroutine [caaba\\_module::caaba\\_read\\_nml](#) ( INTEGER, intent(out) *status*,  
INTEGER, intent(in) *iou* )

Read coupling namelist (based on [dradon\\_read\\_nml\\_cpl](#) by P. Joeckel)

#### Parameters

|            |               |              |
|------------|---------------|--------------|
| <i>out</i> | <i>status</i> | error status |
| <i>in</i>  | <i>iou</i>    | I/O unit     |

5.6.2.5 subroutine `caaba_module::caaba_result` ( )

5.6.2.6 subroutine `caaba_module::calc_sza` ( )

### 5.6.3 Member Data Documentation

5.6.3.1 CHARACTER(LEN=\*), parameter `caaba_module::modstr = 'caaba'`

5.6.3.2 INTEGER `caaba_module::ncid_messy`

The documentation for this module was generated from the following file:

- [/home/sander/e2/messy\\_d2.50s\\_rs/messy/mbm/caaba/caaba.f90](#)

## 5.7 messy\_main\_rnd\_mtw\_ja::delete Interface Reference

### Private Member Functions

- subroutine [gf2x\\_delete](#) (this)
- subroutine [gf2x\\_delete\\_prime](#) (mp)

### 5.7.1 Member Function/Subroutine Documentation

5.7.1.1 subroutine `messy_main_rnd_mtw_ja::delete::gf2x_delete` ( type(gf2x\_obj),  
intent(inout) *this* ) [private]

5.7.1.2 subroutine `messy_main_rnd_mtw_ja::delete::gf2x_delete_prime` (  
type(gf2x\_prime\_obj), intent(inout) *mp* ) [private]

The documentation for this interface was generated from the following file:

- [/home/sander/e2/messy\\_d2.50s\\_rs/messy/mbm/caaba/messy\\_main\\_rnd\\_mtw\\_ja.f90](#)

## 5.8 messy\_main\_rnd\_mtw\_ja::div Interface Reference

### Private Member Functions

- subroutine [gf2x\\_div](#) (q, a, b)

### 5.8.1 Member Function/Subroutine Documentation

5.8.1.1 subroutine `messy_main_rnd_mtw_ja::div::gf2x_div` ( `type(gf2x_obj)`,  
`intent(inout) q`, `type(gf2x_obj)`, `intent(in) a`, `type(gf2x_obj)`, `intent(in) b` )  
`[private]`

The documentation for this interface was generated from the following file:

- [/home/sander/e2/messy\\_d2.50s\\_rs/messy/mbm/caaba/messy\\_main\\_rnd\\_mtw\\_ja.f90](#)

## 5.9 messy\_main\_rnd\_mtw\_ja::div\_by\_x Interface Reference

### Private Member Functions

- subroutine `gf2x_div_by_x` (`c`, `a`, `i`)

#### 5.9.1 Member Function/Subroutine Documentation

5.9.1.1 subroutine `messy_main_rnd_mtw_ja::div_by_x::gf2x_div_by_x` (  
`type(gf2x_obj)`, `intent(inout) c`, `type(gf2x_obj)`, `intent(in) a`, `integer(INT32)`, `intent(in) i` ) `[private]`

The documentation for this interface was generated from the following file:

- [/home/sander/e2/messy\\_d2.50s\\_rs/messy/mbm/caaba/messy\\_main\\_rnd\\_mtw\\_ja.f90](#)

## 5.10 messy\_main\_rnd\_mtw\_ja::divrem Interface Reference

### Private Member Functions

- subroutine `gf2x_divrem` (`q`, `r`, `a`, `b`)

#### 5.10.1 Member Function/Subroutine Documentation

5.10.1.1 subroutine `messy_main_rnd_mtw_ja::divrem::gf2x_divrem` (  
`type(gf2x_obj)`, `intent(inout) q`, `type(gf2x_obj)`, `intent(inout) r`, `type(gf2x_obj)`,  
`intent(in) a`, `type(gf2x_obj)`, `intent(in) b` ) `[private]`

The documentation for this interface was generated from the following file:

- [/home/sander/e2/messy\\_d2.50s\\_rs/messy/mbm/caaba/messy\\_main\\_rnd\\_mtw\\_ja.f90](#)

## 5.11 messy\_cmn\_gasaq::GASQAQ\_TYPE Type Reference

### Private Attributes

- CHARACTER(STRLN\_KPPSPECIES) [name](#)
- REAL(DP) [Henry\\_T0](#)
- REAL(DP) [Henry\\_Tdep](#)
- REAL(DP) [alpha\\_T0](#)
- REAL(DP) [alpha\\_Tdep](#)
- REAL(DP) [dryreac](#)
- REAL(DP) [pss](#)
- REAL(DP) [M](#)

### 5.11.1 Member Data Documentation

5.11.1.1 REAL(DP) messy\_cmn\_gasaq::GASQAQ\_TYPE::alpha\_T0 [private]

5.11.1.2 REAL(DP) messy\_cmn\_gasaq::GASQAQ\_TYPE::alpha\_Tdep [private]

5.11.1.3 REAL(DP) messy\_cmn\_gasaq::GASQAQ\_TYPE::dryreac [private]

5.11.1.4 REAL(DP) messy\_cmn\_gasaq::GASQAQ\_TYPE::Henry\_T0 [private]

5.11.1.5 REAL(DP) messy\_cmn\_gasaq::GASQAQ\_TYPE::Henry\_Tdep [private]

5.11.1.6 REAL(DP) messy\_cmn\_gasaq::GASQAQ\_TYPE::M [private]

5.11.1.7 CHARACTER(STRLN\_KPPSPECIES) messy\_cmn\_gasaq::GASQAQ\_TYPE-  
::name [private]

5.11.1.8 REAL(DP) messy\_cmn\_gasaq::GASQAQ\_TYPE::pss [private]

The documentation for this type was generated from the following file:

- /home/sander/e2/messy\_d2.50s\_rs/messy/mbm/caaba/[messy\\_cmn\\_gasaq.f90](#)

## 5.12 messy\_main\_rnd\_mtw\_ja::gf2x\_obj Type Reference

### Private Attributes

- integer(INT32), dimension(:), pointer [c](#) = > NULL()
- integer(INT32) [deg](#) = -1
- integer(INT32) [size](#) = -1

### 5.12.1 Member Data Documentation

5.12.1.1 `integer(INT32), dimension(:), pointer messy_main_rnd_mtw_ja::gf2x_obj::c = > NULL()` `[private]`

5.12.1.2 `integer(INT32) messy_main_rnd_mtw_ja::gf2x_obj::deg = -1` `[private]`

5.12.1.3 `integer(INT32) messy_main_rnd_mtw_ja::gf2x_obj::size = -1` `[private]`

The documentation for this type was generated from the following file:

- [/home/sander/e2/messy\\_d2.50s\\_rs/messy/mbm/caaba/messy\\_main\\_rnd\\_mtw\\_ja.f90](#)

## 5.13 messy\_main\_rnd\_mtw\_ja::gf2x\_prime\_obj Type Reference

Collaboration diagram for messy\_main\_rnd\_mtw\_ja::gf2x\_prime\_obj:

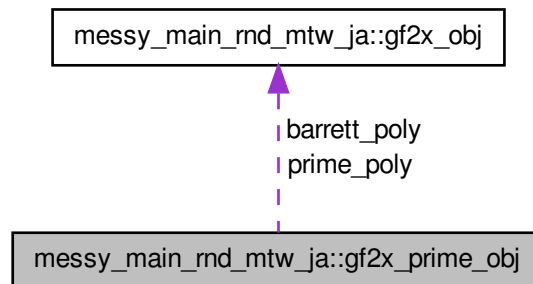

### Private Attributes

- `type(gf2x_obj) prime_poly`
- `type(gf2x_obj) barrett_poly`
- `integer(INT32) deg`

### 5.13.1 Member Data Documentation

5.13.1.1 `type(gf2x_obj) messy_main_rnd_mtw_ja::gf2x_prime_obj::barrett_poly` `[private]`

5.13.1.2 integer(INT32) messy\_main\_rnd\_mtw\_ja::gf2x\_prime\_obj::deg  
[private]

5.13.1.3 type(gf2x\_obj) messy\_main\_rnd\_mtw\_ja::gf2x\_prime\_obj::prime\_poly  
[private]

The documentation for this type was generated from the following file:

- [/home/sander/e2/messy\\_d2.50s\\_rs/messy/mbm/caaba/messy\\_main\\_rnd\\_mtw\\_ja.f90](#)

## 5.14 messy\_main\_tools::ind2val Interface Reference

### Private Member Functions

- subroutine [ind2val\\_1d](#) (val, field, k, f)
- subroutine [ind2val\\_2d](#) (kproma, val, field, k, f)

### 5.14.1 Member Function/Subroutine Documentation

5.14.1.1 subroutine messy\_main\_tools::ind2val::ind2val\_1d ( REAL(DP), intent(out) *val*, REAL(DP), dimension(:), intent(in) *field*, INTEGER, intent(in) *k*, REAL(DP), intent(in), optional *f* ) [private]

5.14.1.2 subroutine messy\_main\_tools::ind2val::ind2val\_2d ( INTEGER, intent(in) *kproma*, REAL(DP), dimension(:), intent(out) *val*, REAL(DP), dimension(:,:), intent(in) *field*, INTEGER, dimension(:), intent(in) *k*, REAL(DP), dimension(:), intent(in), optional *f* ) [private]

The documentation for this interface was generated from the following file:

- [/home/sander/e2/messy\\_d2.50s\\_rs/messy/mbm/caaba/messy\\_main\\_tools.f90](#)

## 5.15 messy\_main\_tools::iso2ind Interface Reference

### Private Member Functions

- subroutine [iso2ind\\_1d](#) (field, iso, k, f, lrev)
- subroutine [iso2ind\\_2d](#) (kproma, field, iso, k, f, lrev)

### 5.15.1 Member Function/Subroutine Documentation

- 5.15.1.1 subroutine `messy_main_tools::iso2ind::iso2ind_1d` ( `REAL(DP)`, `dimension(:)`,  
`intent(in) field`, `REAL(DP)`, `intent(in) iso`, `INTEGER`, `intent(out) k`, `REAL(DP)`, `intent(out)`,  
`optional f`, `LOGICAL`, `intent(in)`, `optional lrev` ) [`private`]
- 5.15.1.2 subroutine `messy_main_tools::iso2ind::iso2ind_2d` ( `INTEGER`, `intent(in)`  
`kproma`, `REAL(DP)`, `dimension(:, :)`, `intent(in) field`, `REAL(DP)`, `dimension(:)`, `intent(in)`  
`iso`, `INTEGER`, `dimension(:)`, `intent(out) k`, `REAL(DP)`, `dimension(:)`, `intent(out)`, `optional`  
`f`, `LOGICAL`, `intent(in)`, `optional lrev` ) [`private`]

The documentation for this interface was generated from the following file:

- [/home/sander/e2/messy\\_d2.50s\\_rs/messy/mbm/caaba/messy\\_main\\_tools.f90](/home/sander/e2/messy_d2.50s_rs/messy/mbm/caaba/messy_main_tools.f90)

## 5.16 messy\_main\_tools\_kp4\_compress::kco\_compress Interface - Reference

### Private Member Functions

- subroutine [kco\\_compress](#) (`n_points`, `T`, `H`, `Hnew`, `IERR`, `f`, `RCONST`, `FIX`, `RejectLastH`, `RejectMoreH`, `Kacc`, `Krej`)

### 5.16.1 Constructor & Destructor Documentation

- 5.16.1.1 subroutine `messy_main_tools_kp4_compress::kco_compress::kco_compress` ( `integer`, `intent(inout) n_points`, `real(kind=dp)`, `dimension(:)`, `intent(inout)`  
`T`, `real(kind=dp)`, `dimension(:)`, `intent(inout) H`, `real(kind=dp)`, `dimension(:)`,  
`intent(inout) Hnew`, `INTEGER`, `dimension(:)`, `intent(inout) IERR`, `real(kind=dp)`,  
`dimension(:, :)`, `intent(inout) f`, `real(kind=dp)`, `dimension(:, :)`, `intent(inout) RCONST`,  
`real(kind=dp)`, `dimension(:, :)`, `intent(inout) FIX`, `LOGICAL`, `dimension(:)`, `intent(inout)`  
`RejectLastH`, `LOGICAL`, `dimension(:)`, `intent(inout) RejectMoreH`, `integer`, `dimension(:)`,  
`intent(inout) Kacc`, `integer`, `dimension(:)`, `intent(inout) Krej` ) [`private`]

The documentation for this interface was generated from the following file:

- [/home/sander/e2/messy\\_d2.50s\\_rs/messy/mbm/caaba/messy\\_main\\_tools\\_kp4\\_compress.f90](/home/sander/e2/messy_d2.50s_rs/messy/mbm/caaba/messy_main_tools_kp4_compress.f90)

## 5.17 messy\_main\_tools\_kp4\_compress::kco\_finalize Interface - Reference

### Private Member Functions

- subroutine [kco\\_finalize](#) (`f`, `IERR`, `Kacc`, `Krej`)



### 5.17.1 Constructor & Destructor Documentation

5.17.1.1 subroutine messy\_main\_tools\_kp4\_compress::kco\_finalize::kco\_finalize ( real(kind=dp), dimension(:,:), intent(inout) *f*, integer, dimension(:), intent(inout) *IERR*, integer, dimension(:), intent(inout) *Kacc*, integer, dimension(:), intent(inout) *Krej* )  
[private]

The documentation for this interface was generated from the following file:

- /home/sander/e2/messy\_d2.50s\_rs/messy/mbm/caaba/messy\_main\_tools\_kp4-\_compress.f90

## 5.18 messy\_main\_tools\_kp4\_compress::kco\_initialize Interface - Reference

### Private Member Functions

- subroutine [kco\\_initialize](#) (npoints\_initial, f, IERR, Kacc, Krej)

### 5.18.1 Constructor & Destructor Documentation

5.18.1.1 subroutine messy\_main\_tools\_kp4\_compress::kco\_initialize::kco\_initialize ( integer, intent(in) *npoints\_initial*, real(kind=dp), dimension(:,:), intent(in) *f*, integer, dimension(:), intent(in) *IERR*, integer, dimension(:), intent(in) *Kacc*, integer, dimension(:), intent(in) *Krej* ) [private]

The documentation for this interface was generated from the following file:

- /home/sander/e2/messy\_d2.50s\_rs/messy/mbm/caaba/messy\_main\_tools\_kp4-\_compress.f90

## 5.19 messy\_cmn\_gasAQ Module Reference

Collaboration diagram for messy\_cmn\_gasAQ:

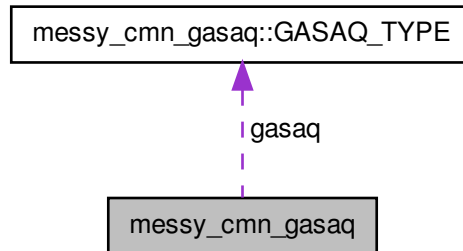

### Data Types

- type [GASAQ\\_TYPE](#)

### Public Member Functions

- subroutine, public [cmn\\_gasAQ\\_initialize](#) (status)
- INTEGER function, public [get\\_gasAQ](#) (name, Henry\_T0, Henry\_Tdep, alpha\_T0, alpha\_Tdep, M, pss, dryreac)

### Private Member Functions

- subroutine [def\\_all\\_species](#) (status)
- subroutine [add\\_all\\_henry](#) (status)
- subroutine [add\\_all\\_alpha](#) (status)
- subroutine [final\\_check](#) (status)
- subroutine [add\\_all\\_dryreac](#) (status)

### Private Attributes

- REAL(DP), parameter [DUMMY](#) = -999.999\_dp
- INTEGER, parameter [MAXSIZE](#) = 150
- INTEGER [n\\_gasAQ](#)
- TYPE([GASAQ\\_TYPE](#)), dimension(maxsize) [gasAQ](#)

### 5.19.1 Member Function/Subroutine Documentation

5.19.1.1 subroutine messy\_cmn\_gasaq::add\_all\_alpha ( INTEGER, intent(inout) *status* )  
[private]

Here is the call graph for this function:

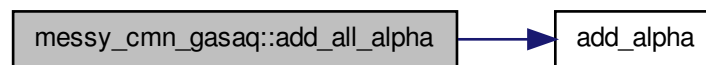

5.19.1.2 subroutine messy\_cmn\_gasaq::add\_all\_dryreac ( INTEGER, intent(inout) *status* )  
[private]

Here is the call graph for this function:

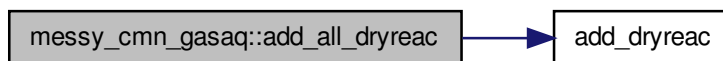

5.19.1.3 subroutine `messy_cm_n_gasaq::add_all_henry` ( `INTEGER`, `intent(inout) status` )  
`[private]`

Here is the call graph for this function:

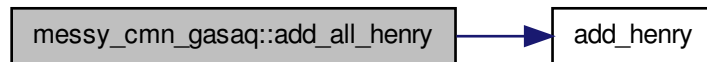

5.19.1.4 subroutine, public `messy_cm_n_gasaq::cm_n_gasaq_initialize` ( `INTEGER`,  
`intent(out) status` )

5.19.1.5 subroutine `messy_cm_n_gasaq::def_all_species` ( `INTEGER`, `intent(inout) status` )  
`[private]`

Here is the call graph for this function:

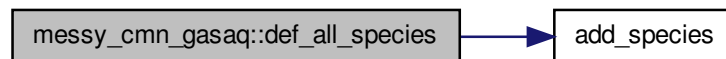

5.19.1.6 subroutine `messy_cm_n_gasaq::final_check` ( `INTEGER`, `intent(inout) status` )  
`[private]`

5.19.1.7 `INTEGER` function, public `messy_cm_n_gasaq::get_gasaq` (  
`CHARACTER(LEN=*)`, `intent(in) name`, `REAL(DP)`, `intent(out)`, optional `Henry.T0`,  
`REAL(DP)`, `intent(out)`, optional `Henry.Tdep`, `REAL(DP)`, `intent(out)`, optional `alpha.T0`,  
`REAL(DP)`, `intent(out)`, optional `alpha.Tdep`, `REAL(DP)`, `intent(out)`, optional `M`,  
`REAL(DP)`, `intent(out)`, optional `pss`, `REAL(DP)`, `intent(out)`, optional `dryreac` )

## 5.19.2 Member Data Documentation

5.19.2.1 REAL(DP), parameter messy\_cmn\_gasaq::DUMMY = -999.999\_dp  
[private]

5.19.2.2 TYPE(GASQAQ\_TYPE), dimension(maxsize) messy\_cmn\_gasaq::gasaq  
[private]

5.19.2.3 INTEGER, parameter messy\_cmn\_gasaq::MAXSIZE = 150 [private]

5.19.2.4 INTEGER messy\_cmn\_gasaq::n\_gasaq [private]

The documentation for this module was generated from the following file:

- /home/sander/e2/messy\_d2.50s\_rs/messy/mbm/caaba/messy\_cmn\_gasaq.f90

## 5.20 messy\_cmn\_photol\_mem Module Reference

### Public Attributes

- INTEGER, parameter, public ip\_O2 = 1
- INTEGER, parameter, public ip\_O3P = 2
- INTEGER, parameter, public ip\_O1D = 3
- INTEGER, parameter, public ip\_H2O2 = 4
- INTEGER, parameter, public ip\_NO2 = 5
- INTEGER, parameter, public ip\_NO2O = 6
- INTEGER, parameter, public ip\_NOO2 = 7
- INTEGER, parameter, public ip\_N2O5 = 8
- INTEGER, parameter, public ip\_HNO3 = 9
- INTEGER, parameter, public ip\_HNO4 = 10
- INTEGER, parameter, public ip\_PAN = 11
- INTEGER, parameter, public ip\_HONO = 12
- INTEGER, parameter, public ip\_CH3OOH = 13
- INTEGER, parameter, public ip\_COH2 = 14
- INTEGER, parameter, public ip\_CHOH = 15
- INTEGER, parameter, public ip\_CH3CO3H = 16
- INTEGER, parameter, public ip\_CH3CHO = 17
- INTEGER, parameter, public ip\_CH3COCH3 = 18
- INTEGER, parameter, public ip\_MGLYOX = 19
- INTEGER, parameter, public ip\_HOCl = 20
- INTEGER, parameter, public ip\_OCIO = 21
- INTEGER, parameter, public ip\_Cl2O2 = 22
- INTEGER, parameter, public ip\_CINO3 = 23
- INTEGER, parameter, public ip\_CINO2 = 24
- INTEGER, parameter, public ip\_Cl2 = 25
- INTEGER, parameter, public ip\_BrO = 26
- INTEGER, parameter, public ip\_HOBr = 27
- INTEGER, parameter, public ip\_BrCl = 28

- INTEGER, parameter, public [ip\\_BrNO3](#) = 29
- INTEGER, parameter, public [ip\\_BrNO2](#) = 30
- INTEGER, parameter, public [ip\\_Br2](#) = 31
- INTEGER, parameter, public [ip\\_CCl4](#) = 32
- INTEGER, parameter, public [ip\\_CH3Cl](#) = 33
- INTEGER, parameter, public [ip\\_CH3CCl3](#) = 34
- INTEGER, parameter, public [ip\\_CFCI3](#) = 35
- INTEGER, parameter, public [ip\\_CF2Cl2](#) = 36
- INTEGER, parameter, public [ip\\_CH3Br](#) = 37
- INTEGER, parameter, public [ip\\_CF2ClBr](#) = 38
- INTEGER, parameter, public [ip\\_CF3Br](#) = 39
- INTEGER, parameter, public [ip\\_CH3I](#) = 40
- INTEGER, parameter, public [ip\\_C3H7I](#) = 41
- INTEGER, parameter, public [ip\\_CH2ClI](#) = 42
- INTEGER, parameter, public [ip\\_CH2I2](#) = 43
- INTEGER, parameter, public [ip\\_IO](#) = 44
- INTEGER, parameter, public [ip\\_HOI](#) = 45
- INTEGER, parameter, public [ip\\_I2](#) = 46
- INTEGER, parameter, public [ip\\_ICI](#) = 47
- INTEGER, parameter, public [ip\\_IBr](#) = 48
- INTEGER, parameter, public [ip\\_INO2](#) = 49
- INTEGER, parameter, public [ip\\_INO3](#) = 50
- INTEGER, parameter, public [ip\\_SO2](#) = 51
- INTEGER, parameter, public [ip\\_SO3](#) = 52
- INTEGER, parameter, public [ip\\_OCS](#) = 53
- INTEGER, parameter, public [ip\\_CS2](#) = 54
- INTEGER, parameter, public [ip\\_H2O](#) = 55
- INTEGER, parameter, public [ip\\_N2O](#) = 56
- INTEGER, parameter, public [ip\\_NO](#) = 57
- INTEGER, parameter, public [ip\\_CO2](#) = 58
- INTEGER, parameter, public [ip\\_HCl](#) = 59
- INTEGER, parameter, public [ip\\_CHCl2Br](#) = 60
- INTEGER, parameter, public [ip\\_CHClBr2](#) = 61
- INTEGER, parameter, public [ip\\_CH2ClBr](#) = 62
- INTEGER, parameter, public [ip\\_CH2Br2](#) = 63
- INTEGER, parameter, public [ip\\_CHBr3](#) = 64
- INTEGER, parameter, public [ip\\_SF6](#) = 65
- INTEGER, parameter, public [ip\\_NO3NOO](#) = 66
- INTEGER, parameter, public [ip\\_ClONO2](#) = 67
- INTEGER, parameter, public [ip\\_MACR](#) = 68
- INTEGER, parameter, public [ip\\_MVK](#) = 69
- INTEGER, parameter, public [ip\\_GLYOX](#) = 70
- INTEGER, parameter, public [ip\\_HOCH2CHO](#) = 71
- INTEGER, parameter, public [ip\\_CH4](#) = 72
- INTEGER, parameter, public [ip\\_O2\\_b1b2](#) = 73
- INTEGER, parameter, public [ip\\_O2\\_b1](#) = 74

- INTEGER, parameter, public `ip_O2_b2` = 75
- INTEGER, parameter, public `ip_O3PO1D` = 76
- INTEGER, parameter, public `ip_O3Pp` = 77
- INTEGER, parameter, public `ip_H2O1D` = 78
- INTEGER, parameter, public `ip_N2` = 79
- INTEGER, parameter, public `ip_N2_b1` = 80
- INTEGER, parameter, public `ip_N2_b2` = 81
- INTEGER, parameter, public `ip_N2_b3` = 82
- INTEGER, parameter, public `ip_NN2D` = 83
- INTEGER, parameter, public `ip_NOp` = 84
- INTEGER, parameter, public `ip_Op_em` = 85
- INTEGER, parameter, public `ip_O2p_em` = 86
- INTEGER, parameter, public `ip_Op_O_em` = 87
- INTEGER, parameter, public `ip_N2p_em` = 88
- INTEGER, parameter, public `ip_Np_N_em` = 89
- INTEGER, parameter, public `ip_Np_N2D_em` = 90
- INTEGER, parameter, public `ip_N_N2D_em` = 91
- INTEGER, parameter, public `ip_Op_em_b` = 92
- INTEGER, parameter, public `ip_se_O2_b1` = 93
- INTEGER, parameter, public `ip_se_O2_b2` = 94
- INTEGER, parameter, public `ip_se_N2_b1` = 95
- INTEGER, parameter, public `ip_se_N2_b2` = 96
- INTEGER, parameter, public `ip_se_N2_b3` = 97
- INTEGER, parameter, public `ip_se_N2_b4` = 98
- INTEGER, parameter, public `ip_se_Op_em` = 99
- INTEGER, parameter, public `ip_O2_aurq` = 100
- INTEGER, parameter, public `ip_N2_aurq` = 101
- INTEGER, parameter, public `ip_H2SO4` = 102
- INTEGER, parameter, public `ip_C3O2` = 103
- INTEGER, parameter, public `ip_CH3NO3` = 104
- INTEGER, parameter, public `ip_CH3O2NO2` = 105
- INTEGER, parameter, public `ip_CH3ONO` = 106
- INTEGER, parameter, public `ip_CH3O2` = 107
- INTEGER, parameter, public `ip_HCOOH` = 108
- INTEGER, parameter, public `IP_MAX` = 108
- CHARACTER(LEN=9), dimension(ip\_max), parameter, public `jname` = (/ 'O2 ', 'O3P ', 'O1D ', 'H2O2 ', 'NO2 ', 'NO2O ', 'NOO2 ', 'N2O5 ', 'HNO3 ', 'HNO4 ', 'PAN ', 'HONO ', 'CH3OOH ', 'COH2 ', 'CHOH ', 'CH3CO3H ', 'CH3CHO ', 'CH3COCH3 ', 'MGLYOX ', 'HOCl ', 'OCIO ', 'Cl2O2 ', 'ClNO3 ', 'ClNO2 ', 'Cl2 ', 'BrO ', 'HOBr ', 'BrCl ', 'BrNO3 ', 'BrNO2 ', 'Br2 ', 'CCl4 ', 'CH3Cl ', 'CH3CCl3 ', 'CFCl3 ', 'CF2Cl2 ', 'CH3Br ', 'CF2ClBr ', 'CF3Br ', 'CH3I ', 'C3H7I ', 'CH2ClI ', 'CH2I2 ', 'IO ', 'HOI ', 'I2 ', 'ICI ', 'IBr ', 'INO2 ', 'INO3 ', 'SO2 ', 'SO3 ', 'OCS ', 'CS2 ', 'H2O ', 'N2O ', 'NO ', 'CO2 ', 'HCl ', 'CHCl2Br ', 'CHClBr2 ', 'CH2ClBr ', 'CH2Br2 ', 'CHBr3 ', 'SF6 ', 'NO3NOO ', 'ClONO2 ', 'MACR ', 'MVK ', 'GLYOX ', 'HOCH2CHO ', 'CH4 ', 'O2\_b1b2 ', 'O2\_b1 ', 'O2\_b2 ', 'O3PO1D ', 'O3Pp ', 'H2O1D ', 'N2 ', 'N2\_b1 ', 'N2\_b2 ', 'N2\_b3 ', 'NN2D ', 'NOp ', 'Op\_em ', 'O2p\_em ', 'Op\_O\_em ', 'N2p\_em ', 'Np\_N\_em ', 'Np\_N2D\_em ', 'N\_N2D\_em ', 'Op\_em\_b ', 'se\_O2\_b1 ', 'se\_O2\_b2 '

','se\_N2\_b1 ','se\_N2\_b2 ','se\_N2\_b3 ','se\_N2\_b4 ','se\_Op\_em ','O2\_aurq ','N2\_aurq ','H2SO4 ','C3O2 ','CH3NO3 ','CH3O2NO2 ','CH3ONO ','CH3O2 ','HCOOH ')/

### 5.20.1 Member Data Documentation

5.20.1.1 INTEGER, parameter, public messy\_cm\_n\_photol\_mem::ip\_Br2 = 31

5.20.1.2 INTEGER, parameter, public messy\_cm\_n\_photol\_mem::ip\_BrCl = 28

5.20.1.3 INTEGER, parameter, public messy\_cm\_n\_photol\_mem::ip\_BrNO2 = 30

5.20.1.4 INTEGER, parameter, public messy\_cm\_n\_photol\_mem::ip\_BrNO3 = 29

5.20.1.5 INTEGER, parameter, public messy\_cm\_n\_photol\_mem::ip\_BrO = 26

5.20.1.6 INTEGER, parameter, public messy\_cm\_n\_photol\_mem::ip\_C3H7I = 41

5.20.1.7 INTEGER, parameter, public messy\_cm\_n\_photol\_mem::ip\_C3O2 = 103

5.20.1.8 INTEGER, parameter, public messy\_cm\_n\_photol\_mem::ip\_CCl4 = 32

5.20.1.9 INTEGER, parameter, public messy\_cm\_n\_photol\_mem::ip\_CF2Cl2 = 36

5.20.1.10 INTEGER, parameter, public messy\_cm\_n\_photol\_mem::ip\_CF2ClBr = 38

5.20.1.11 INTEGER, parameter, public messy\_cm\_n\_photol\_mem::ip\_CF3Br = 39

5.20.1.12 INTEGER, parameter, public messy\_cm\_n\_photol\_mem::ip\_CFCI3 = 35

5.20.1.13 INTEGER, parameter, public messy\_cm\_n\_photol\_mem::ip\_CH2Br2 = 63

5.20.1.14 INTEGER, parameter, public messy\_cm\_n\_photol\_mem::ip\_CH2ClBr = 62

5.20.1.15 INTEGER, parameter, public messy\_cm\_n\_photol\_mem::ip\_CH2ClI = 42

5.20.1.16 INTEGER, parameter, public messy\_cm\_n\_photol\_mem::ip\_CH2I2 = 43

5.20.1.17 INTEGER, parameter, public messy\_cm\_n\_photol\_mem::ip\_CH3Br = 37

5.20.1.18 INTEGER, parameter, public messy\_cm\_n\_photol\_mem::ip\_CH3CCl3 = 34

5.20.1.19 INTEGER, parameter, public messy\_cm\_n\_photol\_mem::ip\_CH3CHO = 17

5.20.1.20 INTEGER, parameter, public messy\_cm\_n\_photol\_mem::ip\_CH3Cl = 33

5.20.1.21 INTEGER, parameter, public messy\_cm\_n\_photol\_mem::ip\_CH3CO3H = 16



- 5.20.1.22 INTEGER, parameter, public messy\_cmn\_photol\_mem::ip\_CH3COCH3 = 18
- 5.20.1.23 INTEGER, parameter, public messy\_cmn\_photol\_mem::ip\_CH3I = 40
- 5.20.1.24 INTEGER, parameter, public messy\_cmn\_photol\_mem::ip\_CH3NO3 = 104
- 5.20.1.25 INTEGER, parameter, public messy\_cmn\_photol\_mem::ip\_CH3O2 = 107
- 5.20.1.26 INTEGER, parameter, public messy\_cmn\_photol\_mem::ip\_CH3O2NO2 = 105
- 5.20.1.27 INTEGER, parameter, public messy\_cmn\_photol\_mem::ip\_CH3ONO = 106
- 5.20.1.28 INTEGER, parameter, public messy\_cmn\_photol\_mem::ip\_CH3OOH = 13
- 5.20.1.29 INTEGER, parameter, public messy\_cmn\_photol\_mem::ip\_CH4 = 72
- 5.20.1.30 INTEGER, parameter, public messy\_cmn\_photol\_mem::ip\_CHBr3 = 64
- 5.20.1.31 INTEGER, parameter, public messy\_cmn\_photol\_mem::ip\_CHCl2Br = 60
- 5.20.1.32 INTEGER, parameter, public messy\_cmn\_photol\_mem::ip\_CHClBr2 = 61
- 5.20.1.33 INTEGER, parameter, public messy\_cmn\_photol\_mem::ip\_CHO2 = 15
- 5.20.1.34 INTEGER, parameter, public messy\_cmn\_photol\_mem::ip\_Cl2 = 25
- 5.20.1.35 INTEGER, parameter, public messy\_cmn\_photol\_mem::ip\_Cl2O2 = 22
- 5.20.1.36 INTEGER, parameter, public messy\_cmn\_photol\_mem::ip\_CINO2 = 24
- 5.20.1.37 INTEGER, parameter, public messy\_cmn\_photol\_mem::ip\_CINO3 = 23
- 5.20.1.38 INTEGER, parameter, public messy\_cmn\_photol\_mem::ip\_CIONO2 = 67
- 5.20.1.39 INTEGER, parameter, public messy\_cmn\_photol\_mem::ip\_CO2 = 58
- 5.20.1.40 INTEGER, parameter, public messy\_cmn\_photol\_mem::ip\_COH2 = 14
- 5.20.1.41 INTEGER, parameter, public messy\_cmn\_photol\_mem::ip\_CS2 = 54
- 5.20.1.42 INTEGER, parameter, public messy\_cmn\_photol\_mem::ip\_GLYOX = 70
- 5.20.1.43 INTEGER, parameter, public messy\_cmn\_photol\_mem::ip\_H2O = 55
- 5.20.1.44 INTEGER, parameter, public messy\_cmn\_photol\_mem::ip\_H2O1D = 78
- 5.20.1.45 INTEGER, parameter, public messy\_cmn\_photol\_mem::ip\_H2O2 = 4

- 5.20.1.46 INTEGER, parameter, public messy\_cm\_n\_photo\_l\_mem::ip\_H2SO4 = 102
- 5.20.1.47 INTEGER, parameter, public messy\_cm\_n\_photo\_l\_mem::ip\_HCl = 59
- 5.20.1.48 INTEGER, parameter, public messy\_cm\_n\_photo\_l\_mem::ip\_HCOOH = 108
- 5.20.1.49 INTEGER, parameter, public messy\_cm\_n\_photo\_l\_mem::ip\_HNO3 = 9
- 5.20.1.50 INTEGER, parameter, public messy\_cm\_n\_photo\_l\_mem::ip\_HNO4 = 10
- 5.20.1.51 INTEGER, parameter, public messy\_cm\_n\_photo\_l\_mem::ip\_HOBr = 27
- 5.20.1.52 INTEGER, parameter, public messy\_cm\_n\_photo\_l\_mem::ip\_HOCH2CHO = 71
- 5.20.1.53 INTEGER, parameter, public messy\_cm\_n\_photo\_l\_mem::ip\_HOCl = 20
- 5.20.1.54 INTEGER, parameter, public messy\_cm\_n\_photo\_l\_mem::ip\_HOI = 45
- 5.20.1.55 INTEGER, parameter, public messy\_cm\_n\_photo\_l\_mem::ip\_HONO = 12
- 5.20.1.56 INTEGER, parameter, public messy\_cm\_n\_photo\_l\_mem::ip\_I2 = 46
- 5.20.1.57 INTEGER, parameter, public messy\_cm\_n\_photo\_l\_mem::ip\_IBr = 48
- 5.20.1.58 INTEGER, parameter, public messy\_cm\_n\_photo\_l\_mem::ip\_ICl = 47
- 5.20.1.59 INTEGER, parameter, public messy\_cm\_n\_photo\_l\_mem::ip\_INO2 = 49
- 5.20.1.60 INTEGER, parameter, public messy\_cm\_n\_photo\_l\_mem::ip\_INO3 = 50
- 5.20.1.61 INTEGER, parameter, public messy\_cm\_n\_photo\_l\_mem::ip\_IO = 44
- 5.20.1.62 INTEGER, parameter, public messy\_cm\_n\_photo\_l\_mem::ip\_MACR = 68
- 5.20.1.63 INTEGER, parameter, public messy\_cm\_n\_photo\_l\_mem::IP\_MAX = 108
- 5.20.1.64 INTEGER, parameter, public messy\_cm\_n\_photo\_l\_mem::ip\_MGLYOX = 19
- 5.20.1.65 INTEGER, parameter, public messy\_cm\_n\_photo\_l\_mem::ip\_MVK = 69
- 5.20.1.66 INTEGER, parameter, public messy\_cm\_n\_photo\_l\_mem::ip\_N2 = 79
- 5.20.1.67 INTEGER, parameter, public messy\_cm\_n\_photo\_l\_mem::ip\_N2\_aurq = 101
- 5.20.1.68 INTEGER, parameter, public messy\_cm\_n\_photo\_l\_mem::ip\_N2\_b1 = 80
- 5.20.1.69 INTEGER, parameter, public messy\_cm\_n\_photo\_l\_mem::ip\_N2\_b2 = 81

- 5.20.1.70 INTEGER, parameter, public messy\_cmn\_photol\_mem::ip\_N2\_b3 = 82
- 5.20.1.71 INTEGER, parameter, public messy\_cmn\_photol\_mem::ip\_N2O = 56
- 5.20.1.72 INTEGER, parameter, public messy\_cmn\_photol\_mem::ip\_N2O5 = 8
- 5.20.1.73 INTEGER, parameter, public messy\_cmn\_photol\_mem::ip\_N2p\_em = 88
- 5.20.1.74 INTEGER, parameter, public messy\_cmn\_photol\_mem::ip\_N\_N2D\_em = 91
- 5.20.1.75 INTEGER, parameter, public messy\_cmn\_photol\_mem::ip\_NN2D = 83
- 5.20.1.76 INTEGER, parameter, public messy\_cmn\_photol\_mem::ip\_NO = 57
- 5.20.1.77 INTEGER, parameter, public messy\_cmn\_photol\_mem::ip\_NO2 = 5
- 5.20.1.78 INTEGER, parameter, public messy\_cmn\_photol\_mem::ip\_NO2O = 6
- 5.20.1.79 INTEGER, parameter, public messy\_cmn\_photol\_mem::ip\_NO3NOO = 66
- 5.20.1.80 INTEGER, parameter, public messy\_cmn\_photol\_mem::ip\_NOO2 = 7
- 5.20.1.81 INTEGER, parameter, public messy\_cmn\_photol\_mem::ip\_NOp = 84
- 5.20.1.82 INTEGER, parameter, public messy\_cmn\_photol\_mem::ip\_Np\_N2D\_em = 90
- 5.20.1.83 INTEGER, parameter, public messy\_cmn\_photol\_mem::ip\_Np\_N\_em = 89
- 5.20.1.84 INTEGER, parameter, public messy\_cmn\_photol\_mem::ip\_O1D = 3
- 5.20.1.85 INTEGER, parameter, public messy\_cmn\_photol\_mem::ip\_O2 = 1
- 5.20.1.86 INTEGER, parameter, public messy\_cmn\_photol\_mem::ip\_O2\_aurq = 100
- 5.20.1.87 INTEGER, parameter, public messy\_cmn\_photol\_mem::ip\_O2\_b1 = 74
- 5.20.1.88 INTEGER, parameter, public messy\_cmn\_photol\_mem::ip\_O2\_b1b2 = 73
- 5.20.1.89 INTEGER, parameter, public messy\_cmn\_photol\_mem::ip\_O2\_b2 = 75
- 5.20.1.90 INTEGER, parameter, public messy\_cmn\_photol\_mem::ip\_O2p\_em = 86
- 5.20.1.91 INTEGER, parameter, public messy\_cmn\_photol\_mem::ip\_O3P = 2
- 5.20.1.92 INTEGER, parameter, public messy\_cmn\_photol\_mem::ip\_O3PO1D = 76
- 5.20.1.93 INTEGER, parameter, public messy\_cmn\_photol\_mem::ip\_O3Pp = 77

- 5.20.1.94 INTEGER, parameter, public messy\_cm\_n\_photol\_mem::ip\_OCIO = 21
- 5.20.1.95 INTEGER, parameter, public messy\_cm\_n\_photol\_mem::ip\_OCS = 53
- 5.20.1.96 INTEGER, parameter, public messy\_cm\_n\_photol\_mem::ip\_Op\_em = 85
- 5.20.1.97 INTEGER, parameter, public messy\_cm\_n\_photol\_mem::ip\_Op\_em\_b = 92
- 5.20.1.98 INTEGER, parameter, public messy\_cm\_n\_photol\_mem::ip\_Op\_O\_em = 87
- 5.20.1.99 INTEGER, parameter, public messy\_cm\_n\_photol\_mem::ip\_PAN = 11
- 5.20.1.100 INTEGER, parameter, public messy\_cm\_n\_photol\_mem::ip\_se\_N2\_b1 = 95
- 5.20.1.101 INTEGER, parameter, public messy\_cm\_n\_photol\_mem::ip\_se\_N2\_b2 = 96
- 5.20.1.102 INTEGER, parameter, public messy\_cm\_n\_photol\_mem::ip\_se\_N2\_b3 = 97
- 5.20.1.103 INTEGER, parameter, public messy\_cm\_n\_photol\_mem::ip\_se\_N2\_b4 = 98
- 5.20.1.104 INTEGER, parameter, public messy\_cm\_n\_photol\_mem::ip\_se\_O2\_b1 = 93
- 5.20.1.105 INTEGER, parameter, public messy\_cm\_n\_photol\_mem::ip\_se\_O2\_b2 = 94
- 5.20.1.106 INTEGER, parameter, public messy\_cm\_n\_photol\_mem::ip\_se\_Op\_em = 99
- 5.20.1.107 INTEGER, parameter, public messy\_cm\_n\_photol\_mem::ip\_SF6 = 65
- 5.20.1.108 INTEGER, parameter, public messy\_cm\_n\_photol\_mem::ip\_SO2 = 51
- 5.20.1.109 INTEGER, parameter, public messy\_cm\_n\_photol\_mem::ip\_SO3 = 52
- 5.20.1.110 CHARACTER(LEN=9), dimension(ip\_max), parameter, public  
 messy\_cm\_n\_photol\_mem::jname = (/ 'O2', 'O3P', 'O1D', 'H2O2', 'NO2',  
 'NO2O', 'NOO2', 'N2O5', 'HNO3', 'HNO4', 'PAN', 'HONO', 'CH3OOH', 'COH2',  
 'CHOH', 'CH3CO3H', 'CH3CHO', 'CH3COCH3', 'MGLYOX', 'HOCl', 'OCIO', 'Cl2O2',  
 'ClNO3', 'ClNO2', 'Cl2', 'BrO', 'HOBr', 'BrCl', 'BrNO3', 'BrNO2', 'Br2', 'CCl4',  
 'CH3Cl', 'CH3CCl3', 'CFCl3', 'CF2Cl2', 'CH3Br', 'CF2ClBr', 'CF3Br', 'CH3I', 'C3H7I',  
 'CH2ClI', 'CH2I2', 'IO', 'HOI', 'I2', 'ICI', 'IBr', 'INO2', 'INO3', 'SO2', 'SO3',  
 'OCS', 'CS2', 'H2O', 'N2O', 'NO', 'CO2', 'HCl', 'CHCl2Br', 'CHClBr2', 'CH2ClBr',  
 'CH2Br2', 'CHBr3', 'SF6', 'NO3NOO', 'ClONO2', 'MACR', 'MVK', 'GLYOX',  
 'HOCH2CHO', 'CH4', 'O2\_b1b2', 'O2\_b1', 'O2\_b2', 'O3PO1D', 'O3Pp', 'H2O1D',  
 'N2', 'N2\_b1', 'N2\_b2', 'N2\_b3', 'NN2D', 'NOp', 'Op\_em', 'O2p\_em', 'Op\_O\_em',  
 'N2p\_em', 'Np\_N\_em', 'Np\_N2D\_em', 'N\_N2D\_em', 'Op\_em\_b', 'se\_O2\_b1', 'se\_O2\_b2',  
 'se\_N2\_b1', 'se\_N2\_b2', 'se\_N2\_b3', 'se\_N2\_b4', 'se\_Op\_em', 'O2\_aurq', 'N2\_aurq',  
 'H2SO4', 'C3O2', 'CH3NO3', 'CH3O2NO2', 'CH3ONO', 'CH3O2', 'HCOOH' /)

The documentation for this module was generated from the following file:

- [/home/sander/e2/messy\\_d2.50s\\_rs/messy/mbm/caaba/messy\\_cmn\\_photol\\_mem.f90](#)

## 5.21 messy\_e4chem Module Reference

### Public Member Functions

- subroutine, public [CHEMICS](#) (KLON, KLEV, JROW, PTEMP, PQ, Conc, PAPP1, PAPHP1, DANI, DANIM, RJ\_O3P, RJ\_O1D, RJ\_NO2, RJ\_HNO3, RJ\_COH2, RJ\_CHOH, RJ\_N2O5, RJ\_HNO4, RJ\_NO2O, RJ\_NOO2, RJ\_H2O2, RJ\_CH3OOH, RJ\_O2, RJ\_CFC11, RJ\_CFC12, RJ\_N2O, RJ\_CLONO2, RJ\_CL2O2, RJ\_HOCL, RJ\_CCL4, RJ\_CH3CL, RJ\_CH3CCL3, RJ\_HCL, RJ\_H2O, RJ\_NO, RJ\_CO2, zlat, IMONTH, DTIME, tp\_i, ZDELTAO3\_BRV, ZPRODO2, ZPRODCO, ZPRODCH4, ZDESTH12, ZDESTH14, ZDESTN13, ZDESTC1, ZDESTCL2O2, ZDESTCLOH, ZDESTH8, ZDESTH4, ZDESTH11, ZDESTO1)
- subroutine, public [INRCGAS](#)
- subroutine, public [inisulnew](#) (latitude, nproma, ngpblks, npromz, vnpromz)
- subroutine, public [CLSCAV](#) (Conc, PTMST, PRHOA, PDP, zmrateg, zfpreg, zfevap, zclcover, zmlwc, cvdprec, kconbot, PT, NLON, NLEV)
- subroutine, public [e4chem\\_read\\_nml\\_ctrl](#) (status, iou)

### Public Attributes

- CHARACTER(LEN=\*), parameter, public [modstr](#) = 'e4chem'
- CHARACTER(LEN=\*), parameter, public [modver](#) = '1.0'
- LOGICAL, public [l\\_fastscav](#) = .FALSE.
- LOGICAL, public [l\\_Brparam](#) = .FALSE.
- INTEGER, public [NSTCHPH](#) = 1
- INTEGER, parameter, public [NSPEC](#) = 39
- INTEGER, parameter, public [ind\\_H](#) = 1
- INTEGER, parameter, public [ind\\_OH](#) = 2
- INTEGER, parameter, public [ind\\_HO2](#) = 3
- INTEGER, parameter, public [ind\\_N](#) = 4
- INTEGER, parameter, public [ind\\_NO](#) = 5
- INTEGER, parameter, public [ind\\_NO2](#) = 6
- INTEGER, parameter, public [ind\\_NO3](#) = 7
- INTEGER, parameter, public [ind\\_N2O5](#) = 8
- INTEGER, parameter, public [ind\\_HNO4](#) = 9
- INTEGER, parameter, public [ind\\_CL](#) = 10
- INTEGER, parameter, public [ind\\_CLO](#) = 11
- INTEGER, parameter, public [ind\\_HOCl](#) = 12
- INTEGER, parameter, public [ind\\_CL2O2](#) = 13
- INTEGER, parameter, public [ind\\_CL2](#) = 14
- INTEGER, parameter, public [ind\\_HCHO](#) = 15
- INTEGER, parameter, public [ind\\_CH3O2](#) = 16

- INTEGER, parameter, public `ind_CH4` = 17
- INTEGER, parameter, public `ind_N2O` = 18
- INTEGER, parameter, public `ind_H2O2` = 19
- INTEGER, parameter, public `ind_HCl` = 20
- INTEGER, parameter, public `ind_CO` = 21
- INTEGER, parameter, public `ind_CH3OOH` = 22
- INTEGER, parameter, public `ind_CINO3` = 23
- INTEGER, parameter, public `ind_CFCI3` = 24
- INTEGER, parameter, public `ind_CF2CI2` = 25
- INTEGER, parameter, public `ind_CH3CL` = 26
- INTEGER, parameter, public `ind_CCL4` = 27
- INTEGER, parameter, public `ind_CH3CCL3` = 28
- INTEGER, parameter, public `ind_H2` = 29
- INTEGER, parameter, public `ind_HNO3` = 30
- INTEGER, parameter, public `ind_NAT` = 31
- INTEGER, parameter, public `ind_OHAB` = 32
- INTEGER, parameter, public `ind_HO2AB` = 33
- INTEGER, parameter, public `ind_ICE` = 34
- INTEGER, parameter, public `ind_H2O` = 35
- INTEGER, parameter, public `ind_O3P` = 36
- INTEGER, parameter, public `ind_O3` = 37
- INTEGER, parameter, public `ind_O1D` = 38
- INTEGER, parameter, public `ind_CO2` = 39
- INTEGER, parameter, public `JVALS` = 4
- INTEGER, parameter, public `NUMRAT` = 67
- INTEGER, parameter, public `IRCTMIN` = 150
- INTEGER, parameter, public `IRCTMAX` = 320
- INTEGER, parameter, public `JDIFTE` = `IRCTMAX - IRCTMIN`
- INTEGER, parameter, public `NUMTEM` = `JDIFTE * JVALS + 1`
- REAL(dp), dimension(:,:), allocatable, save, public `RCGAS`
- REAL(dp), dimension(:,:), allocatable, save, public `sulook`
- INTEGER, parameter, public `ksul` = 177
- CHARACTER(LEN=32), dimension(39), parameter, public `SPC_NAMES` = (/ 'H', 'OH', 'HO2', 'N', 'NO', 'NO2', 'NO3', 'N2O5', 'HNO4', 'CL', 'CLO', 'HOCl', 'CL2O2', 'CL2', 'HCHO', 'CH3O2', 'CH4', 'N2O', 'H2O2', 'HCl', 'CO', 'CH3OOH', 'CINO3', 'CFCI3', 'CF2CI2', 'CH3CL', 'CCL4', 'CH3CCL3', 'H2', 'HNO3', 'NAT', 'OHAB', 'HO2AB', 'ICE', 'H2O', 'O3P', 'O3', 'O1D', 'CO2' /)

### 5.21.1 Member Function/Subroutine Documentation

5.21.1.1 subroutine, public messy\_e4chem::CHEMICS ( INTEGER, intent(in) *KLON*,  
 INTEGER, intent(in) *KLEV*, INTEGER, intent(in) *JROW*, REAL(DP), dimension(:,:),  
 intent(in) *PTEMP*, REAL(DP), dimension(:,:), intent(in) *PQ*, REAL(DP), dimension(:,:),  
 intent(inout) *Conc*, REAL(dp), dimension(:,:), intent(in) *PAPP1*, REAL(dp),  
 dimension(:,:), intent(in) *PAPHP1*, REAL(dp), dimension(:,:), intent(in) *DANI*, REAL(dp),  
 dimension(:,:), intent(in) *DANIM*, REAL(DP), dimension(:,:), intent(in) *RJ\_O3P*, REAL(DP),  
 dimension(:,:), intent(in) *RJ\_O1D*, REAL(DP), dimension(:,:), intent(in) *RJ\_NO2*,  
 REAL(DP), dimension(:,:), intent(in) *RJ\_HNO3*, REAL(DP), dimension(:,:), intent(in)  
*RJ\_COH2*, REAL(DP), dimension(:,:), intent(in) *RJ\_CHOH*, REAL(DP), dimension(:,:),  
 intent(in) *RJ\_N2O5*, REAL(DP), dimension(:,:), intent(in) *RJ\_HNO4*, REAL(DP),  
 dimension(:,:), intent(in) *RJ\_NO2O*, REAL(DP), dimension(:,:), intent(in) *RJ\_NOO2*,  
 REAL(DP), dimension(:,:), intent(in) *RJ\_H2O2*, REAL(DP), dimension(:,:), intent(in)  
*RJ\_CH3OOH*, REAL(DP), dimension(:,:), intent(in) *RJ\_O2*, REAL(DP), dimension(:,:),  
 intent(in) *RJ\_CFC11*, REAL(DP), dimension(:,:), intent(in) *RJ\_CFC12*, REAL(DP),  
 dimension(:,:), intent(in) *RJ\_N2O*, REAL(DP), dimension(:,:), intent(in) *RJ\_CLONO2*,  
 REAL(DP), dimension(:,:), intent(in) *RJ\_CL2O2*, REAL(DP), dimension(:,:), intent(in)  
*RJ\_HOCL*, REAL(DP), dimension(:,:), intent(in) *RJ\_CCL4*, REAL(DP), dimension(:,:),  
 intent(in) *RJ\_CH3CL*, REAL(DP), dimension(:,:), intent(in) *RJ\_CH3CCL3*, REAL(DP),  
 dimension(:,:), intent(in) *RJ\_HCL*, REAL(DP), dimension(:,:), intent(in) *RJ\_H2O*,  
 REAL(DP), dimension(:,:), intent(in) *RJ\_NO*, REAL(DP), dimension(:,:), intent(in)  
*RJ\_CO2*, REAL(dp), dimension(:,:), intent(in) *zlat*, INTEGER, intent(in) *IMONTH*,  
 REAL(dp), intent(in) *DTIME*, REAL(dp), dimension(:,:), intent(in) *tp\_i*, REAL(dp),  
 dimension(:,:), intent(inout) *ZDELTAO3\_BRV*, REAL(dp), dimension(:,:), intent(inout)  
*ZPRODO2*, REAL(dp), dimension(:,:), intent(inout) *ZPRODCO*, REAL(dp), dimension(:,:),  
 intent(inout) *ZPRODCH4*, REAL(dp), dimension(:,:), intent(inout) *ZDESTH12*, REAL(dp),  
 dimension(:,:), intent(inout) *ZDESTH14*, REAL(dp), dimension(:,:), intent(inout)  
*ZDESTN13*, REAL(dp), dimension(:,:), intent(inout) *ZDESTC1*, REAL(dp), dimension(:,:),  
 intent(inout) *ZDESTCL2O2*, REAL(dp), dimension(:,:), intent(inout) *ZDESTCLOH*,  
 REAL(dp), dimension(:,:), intent(inout) *ZDESTH8*, REAL(dp), dimension(:,:), intent(inout)  
*ZDESTH4*, REAL(dp), dimension(:,:), intent(inout) *ZDESTH11*, REAL(dp), dimension(:,:),  
 intent(inout) *ZDESTO1* )

Here is the call graph for this function:

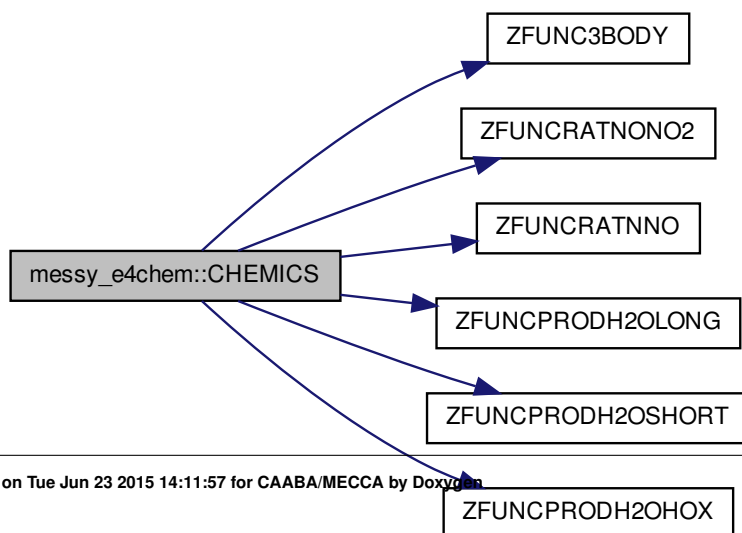

5.21.1.2 subroutine, public messy\_e4chem::CLSCAV ( REAL(dp),  
dimension(nlon,nlev,nspec), intent(inout) *Conc*, REAL(dp), intent(in) *PTMST*, REAL(dp),  
dimension(nlon,nlev), intent(in) *PRHOA*, REAL(dp), dimension(nlon,nlev), intent(in) *PDP*,  
REAL(dp), dimension(nlon,nlev), intent(in) *zmrates*, REAL(dp), dimension(nlon,nlev),  
intent(in) *zfpres*, REAL(dp), dimension(nlon,nlev), intent(in) *zfevap*, REAL(dp),  
dimension(nlon,nlev), intent(in) *zclcover*, REAL(dp), dimension(nlon,nlev), intent(in)  
*zmlwc*, REAL(dp), dimension(nlon,nlev), intent(in) *cvdprec*, REAL(dp), dimension(nlon),  
intent(in) *kconbot*, REAL(dp), dimension(nlon,nlev), intent(in) *PT*, INTEGER, intent(in)  
*NLON*, INTEGER, intent(in) *NLEV* )

5.21.1.3 subroutine, public messy\_e4chem::e4chem\_read\_nml\_ctrl ( INTEGER,  
intent(out) *status*, INTEGER, intent(in) *iou* )

5.21.1.4 subroutine, public messy\_e4chem::inisulnew ( REAL(dp), dimension(:,:),  
intent(in) *latitude*, INTEGER, intent(in) *nproma*, INTEGER, intent(in) *ngpblks*, INTEGER,  
intent(in), optional *npromz*, INTEGER, dimension(:), intent(in), optional *vnpromz* )

5.21.1.5 subroutine, public messy\_e4chem::INRCGAS ( )

## 5.21.2 Member Data Documentation

5.21.2.1 INTEGER, parameter, public messy\_e4chem::ind\_CCL4 = 27

5.21.2.2 INTEGER, parameter, public messy\_e4chem::ind\_CF2Cl2 = 25

5.21.2.3 INTEGER, parameter, public messy\_e4chem::ind\_CFCI3 = 24

5.21.2.4 INTEGER, parameter, public messy\_e4chem::ind\_CH3CCL3 = 28

5.21.2.5 INTEGER, parameter, public messy\_e4chem::ind\_CH3CL = 26

5.21.2.6 INTEGER, parameter, public messy\_e4chem::ind\_CH3O2 = 16

5.21.2.7 INTEGER, parameter, public messy\_e4chem::ind\_CH3OOH = 22

5.21.2.8 INTEGER, parameter, public messy\_e4chem::ind\_CH4 = 17

5.21.2.9 INTEGER, parameter, public messy\_e4chem::ind\_CL = 10

5.21.2.10 INTEGER, parameter, public messy\_e4chem::ind\_CL2 = 14

5.21.2.11 INTEGER, parameter, public messy\_e4chem::ind\_CL2O2 = 13

5.21.2.12 INTEGER, parameter, public messy\_e4chem::ind\_CINO3 = 23

5.21.2.13 INTEGER, parameter, public messy\_e4chem::ind\_CLO = 11



- 5.21.2.14 INTEGER, parameter, public messy\_e4chem::ind\_CO = 21
- 5.21.2.15 INTEGER, parameter, public messy\_e4chem::ind\_CO2 = 39
- 5.21.2.16 INTEGER, parameter, public messy\_e4chem::ind\_H = 1
- 5.21.2.17 INTEGER, parameter, public messy\_e4chem::ind\_H2 = 29
- 5.21.2.18 INTEGER, parameter, public messy\_e4chem::ind\_H2O = 35
- 5.21.2.19 INTEGER, parameter, public messy\_e4chem::ind\_H2O2 = 19
- 5.21.2.20 INTEGER, parameter, public messy\_e4chem::ind\_HCHO = 15
- 5.21.2.21 INTEGER, parameter, public messy\_e4chem::ind\_HCl = 20
- 5.21.2.22 INTEGER, parameter, public messy\_e4chem::ind\_HNO3 = 30
- 5.21.2.23 INTEGER, parameter, public messy\_e4chem::ind\_HNO4 = 9
- 5.21.2.24 INTEGER, parameter, public messy\_e4chem::ind\_HO2 = 3
- 5.21.2.25 INTEGER, parameter, public messy\_e4chem::ind\_HO2AB = 33
- 5.21.2.26 INTEGER, parameter, public messy\_e4chem::ind\_HOCl = 12
- 5.21.2.27 INTEGER, parameter, public messy\_e4chem::ind\_ICE = 34
- 5.21.2.28 INTEGER, parameter, public messy\_e4chem::ind\_N = 4
- 5.21.2.29 INTEGER, parameter, public messy\_e4chem::ind\_N2O = 18
- 5.21.2.30 INTEGER, parameter, public messy\_e4chem::ind\_N2O5 = 8
- 5.21.2.31 INTEGER, parameter, public messy\_e4chem::ind\_NAT = 31
- 5.21.2.32 INTEGER, parameter, public messy\_e4chem::ind\_NO = 5
- 5.21.2.33 INTEGER, parameter, public messy\_e4chem::ind\_NO2 = 6
- 5.21.2.34 INTEGER, parameter, public messy\_e4chem::ind\_NO3 = 7
- 5.21.2.35 INTEGER, parameter, public messy\_e4chem::ind\_O1D = 38
- 5.21.2.36 INTEGER, parameter, public messy\_e4chem::ind\_O3 = 37
- 5.21.2.37 INTEGER, parameter, public messy\_e4chem::ind\_O3P = 36

- 5.21.2.38 INTEGER, parameter, public messy\_e4chem::ind\_OH = 2
- 5.21.2.39 INTEGER, parameter, public messy\_e4chem::ind\_OHAB = 32
- 5.21.2.40 INTEGER, parameter, public messy\_e4chem::IRCTMAX = 320
- 5.21.2.41 INTEGER, parameter, public messy\_e4chem::IRCTMIN = 150
- 5.21.2.42 INTEGER, parameter, public messy\_e4chem::JDIFTE = IRCTMAX - IRCTMIN
- 5.21.2.43 INTEGER, parameter, public messy\_e4chem::JVALS = 4
- 5.21.2.44 INTEGER, parameter, public messy\_e4chem::ksul = 177
- 5.21.2.45 LOGICAL, public messy\_e4chem::l\_Brparam = .FALSE.
- 5.21.2.46 LOGICAL, public messy\_e4chem::l\_fastscav = .FALSE.
- 5.21.2.47 CHARACTER(LEN=\*), parameter, public messy\_e4chem::modstr = 'e4chem'
- 5.21.2.48 CHARACTER(LEN=\*), parameter, public messy\_e4chem::modver = '1.0'
- 5.21.2.49 INTEGER, parameter, public messy\_e4chem::NSPEC = 39
- 5.21.2.50 INTEGER, public messy\_e4chem::NSTCHPH = 1
- 5.21.2.51 INTEGER, parameter, public messy\_e4chem::NUMRAT = 67
- 5.21.2.52 INTEGER, parameter, public messy\_e4chem::NUMTEM = JDIFTE \* JVALS + 1
- 5.21.2.53 REAL(dp), dimension(:,:), allocatable, save, public messy\_e4chem::RCGAS
- 5.21.2.54 CHARACTER(LEN=32), dimension(39), parameter, public  
 messy\_e4chem::SPC\_NAMES = (/ 'H','OH','HO2','N','NO','NO2','NO3','N2O5',  
 'HNO4','CL','CLO','HOCl','CL2O2','CL2','HCHO','CH3O2','CH4','N2O','H2O2',  
 'HCl','CO','CH3OOH','CINO3','CFCI3','CF2CI2','CH3CL','CCL4','CH3CCL3','H2',  
 'HNO3','NAT','OHAB','HO2AB','ICE','H2O','O3P','O3','O1D','CO2'/)
- 5.21.2.55 REAL(dp), dimension(:,:), allocatable, save, public messy\_e4chem::sulook

The documentation for this module was generated from the following file:

- /home/sander/e2/messy\_d2.50s\_rs/messy/mbm/caaba/[messy\\_e4chem.f90](#)

## 5.22 messy\_e4chem\_box Module Reference

## Public Member Functions

- subroutine, public [e4chem\\_init](#)
- subroutine [x0](#)
- subroutine, public [e4chem\\_physc](#)
- subroutine, public [e4chem\\_result](#)
- subroutine, public [e4chem\\_finish](#)

## Public Attributes

- REAL(DP), dimension(ip\_max) [jx](#) = 0.
- REAL(DP), dimension(:), allocatable [lwc](#)
- INTEGER [ncid\\_tracer](#)
- INTEGER [ncid\\_spec](#)
- INTEGER [ncid\\_diag](#)
- INTEGER, parameter [NDIAG](#) = 14
- CHARACTER(LEN=32), parameter [DIAG\\_NAMES](#) = (/ 'ZDELTAO3\_BRV ', 'ZP-RODO2 ', 'ZPRODCH4 ', 'ZDESTH12 ', 'ZDESTH14 ', 'ZDEST-N13 ', 'ZDESTC1 ', 'ZDESTCL2O2 ', 'ZDESTCLOH ', 'ZDESTH8 ', 'ZDESTH4 ', 'ZDESTH11 ', 'ZDESTO1 ' /)
- CHARACTER(LEN=20), dimension(ndiag) [unit\\_diag](#)
- REAL(dp), dimension(ndiag) [zdiag](#)
- REAL(dp), dimension(:), allocatable [DANI](#)
- REAL(dp), dimension(:), allocatable [DANIM](#)

### 5.22.1 Member Function/Subroutine Documentation

5.22.1.1 subroutine, public messy\_e4chem\_box::e4chem\_finish ( )

5.22.1.2 subroutine, public messy\_e4chem\_box::e4chem\_init ( )

5.22.1.3 subroutine, public messy\_e4chem\_box::e4chem\_physc ( )

Here is the call graph for this function:

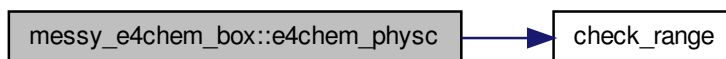

5.22.1.4 subroutine, public messy\_e4chem\_box::e4chem\_result ( )

5.22.1.5 subroutine messy\_e4chem\_box::x0 ( )

Here is the call graph for this function:

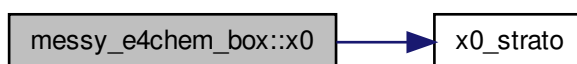

## 5.22.2 Member Data Documentation

5.22.2.1 REAL(dp), dimension(:), allocatable messy\_e4chem\_box::DANI

5.22.2.2 REAL(dp), dimension(:), allocatable messy\_e4chem\_box::DANIM

5.22.2.3 CHARACTER(LEN=32), parameter messy\_e4chem\_box::DIAG\_NAMES = (/ 'ZDELTAO3\_BRV', 'ZPRODO2', 'ZPRODCO', 'ZPRODCH4', 'ZDESTH12', 'ZDESTH14', 'ZDESTN13', 'ZDESTC1', 'ZDESTCL2O2', 'ZDESTCLOH', 'ZDESTH8', 'ZDESTH4', 'ZDESTH11', 'ZDESTO1' /)

5.22.2.4 REAL(DP), dimension(ip\_max) messy\_e4chem\_box::jx = 0.

5.22.2.5 REAL(DP), dimension(:), allocatable messy\_e4chem\_box::lwc

5.22.2.6 INTEGER messy\_e4chem\_box::ncid\_diag

5.22.2.7 INTEGER messy\_e4chem\_box::ncid\_spec

5.22.2.8 INTEGER messy\_e4chem\_box::ncid\_tracer

5.22.2.9 INTEGER, parameter messy\_e4chem\_box::NDIAG = 14

5.22.2.10 CHARACTER(LEN=20), dimension(ndiag) messy\_e4chem\_box::unit\_diag

5.22.2.11 REAL(dp), dimension(ndiag) messy\_e4chem\_box::zdiag

The documentation for this module was generated from the following file:

- [/home/sander/e2/messy\\_d2.50s\\_rs/messy/mbm/caaba/messy\\_e4chem\\_box.f90](/home/sander/e2/messy_d2.50s_rs/messy/mbm/caaba/messy_e4chem_box.f90)

## 5.23 messy\_jval Module Reference

### Public Member Functions

- subroutine, public [aerosol\\_data](#)
- subroutine, public [combine\\_o3\\_fields](#) (input\_O3, press\_2d, press\_h, o3\_h, v3\_h, o3\_2d, v3\_2d)
- subroutine, public [jvalues](#) (v3\_2d, cossza\_1d, press\_2d, relo3\_2d, rhum\_2d, temp\_2d, albedo\_1d, aclc\_2d, slf\_1d, clp\_2d, lmidatm, l\_heating, pbllev)
- subroutine, public [jval\\_read\\_nml\\_ctrl](#) (status, iou)
- subroutine, public [jval\\_solar\\_time\\_control](#) (status, cdisse, val)

### Public Attributes

- CHARACTER(LEN=\*), parameter, public [modstr](#) = 'jval'
- CHARACTER(LEN=\*), parameter, public [modver](#) = '14'
- INTEGER, save, public [qy\\_CH3COCH3](#) = 1
- REAL(DP), save, public [r\\_sol](#) = 0.5\_dp
- LOGICAL, dimension(ip\_max), save, public [lp](#) = .FALSE.
- TYPE(PTR\_2D\_ARRAY), dimension(:), pointer, save, public [jval\\_2d](#)
- REAL(dp), dimension(:,:), pointer, public [rh\\_o2\\_2d](#)
- REAL(dp), dimension(:,:), pointer, public [rh\\_o3\\_2d](#)
- REAL(dp), dimension(:,:), pointer, public [fhuv\\_2d](#)
- REAL(dp), dimension(:,:), pointer, public [fhuvdna\\_2d](#)

### Private Member Functions

- subroutine [jval\\_cal\\_uv](#)
- REAL function [p1](#) (c0, c1, x)
- REAL function [p2](#) (c0, c1, c2, x)
- REAL function [p3](#) (c0, c1, c2, c3, x)

### Private Attributes

- INTEGER, parameter [MAXWAV](#) = 7
- INTEGER, parameter [dim55](#) = 55
- INTEGER, parameter [dim58](#) = 58
- REAL, dimension(maxwav, 8, 4) [aext](#)
- REAL, dimension(maxwav, 8, 4) [asca](#)
- REAL, dimension(maxwav, 8, 4) [aabs](#)
- REAL, dimension(maxwav, 8, 4) [ag](#)
- REAL, dimension(maxwav), save [flux](#)
- REAL, dimension(maxwav), parameter [crray](#) = (/ 3.1995E-25, 6.7791E-26, 5.-4920E-26, 4.9733E-26, 4.2781E-26, 2.3131E-26, 3.6810E-27 /)
- REAL, dimension(maxwav), save [f0](#)

- REAL, save [SR\\_toa\\_flux](#)
- REAL, save [phi\\_la](#)
- INTEGER [klev](#)
- INTEGER [kproma\\_day](#)
- REAL, parameter [press\\_ref](#) = 1.E4
- REAL, parameter [dens\\_ref](#) = PRESS\_REF/(k\_B\* 250.)\*1.E-6
- REAL, dimension(3), parameter [b\\_la](#) = (/ 6.84310E-01, 2.29821E-01, 8.65412E-02 /)
- REAL, dimension(3), parameter [c\\_la](#) = (/ 8.22114E-21, 1.77556E-20, 8.22112E-21 /)
- REAL, dimension(3), parameter [d\\_la](#) = (/ 6.00730E-21, 4.28569E-21, 1.28059E-20 /)
- REAL, dimension(3), parameter [e\\_la](#) = (/ 8.21666E-21, 1.63296E-20, 4.85121E-17 /)
- INTEGER, dimension(:), allocatable [iu0](#)
- REAL, dimension(:,:), allocatable [temp](#)
- REAL, dimension(:,:), allocatable [press](#)
- REAL, dimension(:,:), allocatable [v2s\\_m](#)
- REAL, dimension(:,:), allocatable [v3\\_du1](#)
- REAL, dimension(:,:), allocatable [v3\\_du2](#)
- REAL, dimension(:,:), allocatable [dlv2](#)
- REAL, dimension(:,:), allocatable [dens](#)
- REAL, dimension(:,:), allocatable [fint](#)
- REAL, dimension(:,:), allocatable [finth](#)
- REAL, dimension(:,:), allocatable [fj\\_corr](#)
- REAL, dimension(:,:), allocatable [tnorm\\_sr](#)
- REAL, dimension(:,:), allocatable [tnorm](#)
- INTEGER, dimension(:,:), allocatable [i0](#)
- INTEGER, dimension(:,:), allocatable [i1](#)
- INTEGER, dimension(:,:), allocatable [i2](#)
- INTEGER, dimension(:,:), allocatable [i3](#)
- REAL, dimension(:,:), allocatable [sig\\_top\\_o2](#)
- REAL, dimension(:,:), allocatable [sig\\_top\\_o3](#)
- REAL, dimension(:,:), allocatable [r\\_m](#)
- REAL, dimension(:,:), allocatable [r\\_o2](#)
- REAL, dimension(maxwav), parameter [fmax](#) = (/ 2.5400E+12, 2.2200E+14, 7.-4700E+13, 8.9700E+13, 1.2600E+14, 1.1100E+15, 2.6700E+15/)
- REAL, dimension(maxwav), parameter [fmin](#) = (/ 2.3400E+12, 2.2100E+14, 7.-4300E+13, 8.9200E+13, 1.2600E+14, 1.1100E+15, 2.6700E+15/)
- REAL, dimension(maxwav), parameter [f0max](#) = (/6.97E+01, 5.1333, 1.7116E+01, 8.930, 2.6699E+01, 18.62, 48.184/)
- REAL, dimension(maxwav), parameter [f0min](#) = (/7.2679E+01, 5.0584E+00, 1.-7139E+01, 8.9395E+00, 2.6714E+01, 1.8595E+01, 4.8184E+01/)

### 5.23.1 Member Function/Subroutine Documentation

5.23.1.1 subroutine, public messy\_jval::aerosol\_data ( )

5.23.1.2 subroutine, public messy\_jval::combine\_o3\_fields ( REAL(DP), dimension(:,:),  
intent(in) *input\_O3*, REAL(DP), dimension(:,:), intent(in) *press\_2d*, REAL(DP),  
dimension(:,:), intent(in) *press\_h*, REAL(DP), dimension(:,:), intent(in) *o3\_h*, REAL(DP),  
dimension(:,:), intent(in) *v3\_h*, REAL(DP), dimension(:,:), intent(out) *o3\_2d*, REAL(DP),  
dimension(:,:), intent(out) *v3\_2d* )

5.23.1.3 subroutine messy\_jval::jval\_cal\_uv ( ) [private]

5.23.1.4 subroutine, public messy\_jval::jval\_read\_nml\_ctrl ( INTEGER, intent(out) *status*,  
INTEGER, intent(in) *iou* )

5.23.1.5 subroutine, public messy\_jval::jval\_solar\_time\_control ( INTEGER, intent(out)  
*status*, REAL(DP), intent(in) *cdisse*, REAL(DP), dimension(:), intent(in), optional *val* )

5.23.1.6 subroutine, public messy\_jval::jvalues ( REAL, dimension(:,:), intent(in) *v3\_2d*, REAL, dimension(:), intent(in) *cosza\_1d*, REAL, dimension(:,:), intent(in) *press\_2d*, REAL, dimension(:,:), intent(in) *relo3\_2d*, REAL, dimension(:,:), intent(in) *rhum\_2d*, REAL, dimension(:,:), intent(in) *temp\_2d*, REAL, dimension(:), intent(in) *albedo\_1d*, REAL, dimension(:,:), intent(in) *aclc\_2d*, REAL, dimension(:), intent(in) *slf\_1d*, REAL, dimension(:,:), intent(in) *clp\_2d*, LOGICAL, intent(in) *lmidatm*, LOGICAL, intent(in) *l\_heating*, INTEGER, intent(in) *pbllev* )

Here is the call graph for this function:

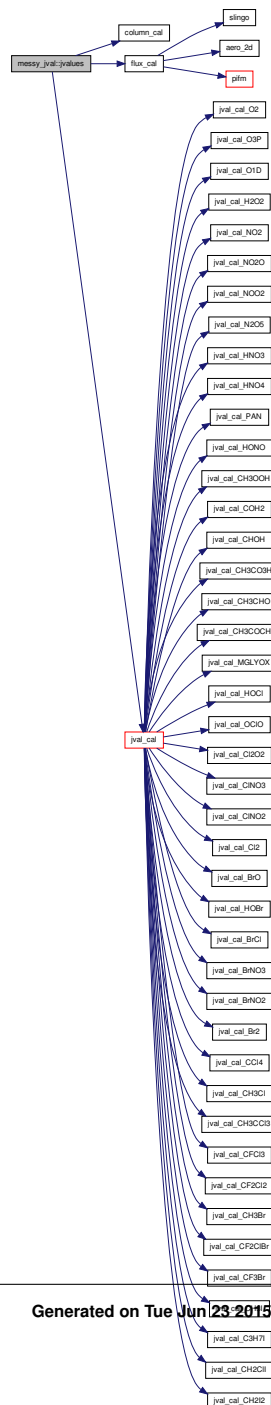



5.23.1.7 REAL function messy\_jval::p1 ( REAL *c0*, REAL *c1*, REAL *x* ) [private]

5.23.1.8 REAL function messy\_jval::p2 ( REAL *c0*, REAL *c1*, REAL *c2*, REAL *x* )  
[private]

5.23.1.9 REAL function messy\_jval::p3 ( REAL *c0*, REAL *c1*, REAL *c2*, REAL *c3*, REAL *x* )  
[private]

## 5.23.2 Member Data Documentation

5.23.2.1 REAL, dimension(maxwav,8,4) messy\_jval::aabs [private]

5.23.2.2 REAL, dimension(maxwav,8,4) messy\_jval::aext [private]

5.23.2.3 REAL, dimension(maxwav,8,4) messy\_jval::ag [private]

5.23.2.4 REAL, dimension(maxwav,8,4) messy\_jval::asca [private]

5.23.2.5 REAL, dimension(3), parameter messy\_jval::b\_la = (/ 6.84310E-01, 2.29821E-01,  
8.65412E-02 /) [private]

5.23.2.6 REAL, dimension(3), parameter messy\_jval::c\_la = (/ 8.22114E-21, 1.77556E-20,  
8.22112E-21 /) [private]

5.23.2.7 REAL, dimension(maxwav), parameter messy\_jval::crray = (/ 3.1995E-25, 6.7791E-26,  
5.4920E-26, 4.9733E-26, 4.2781E-26, 2.3131E-26, 3.6810E-27 /) [private]

5.23.2.8 REAL, dimension(3), parameter messy\_jval::d\_la = (/ 6.00730E-21, 4.28569E-21,  
1.28059E-20 /) [private]

5.23.2.9 REAL, dimension(:,:), allocatable messy\_jval::dens [private]

5.23.2.10 REAL, parameter messy\_jval::dens\_ref = PRESS\_REF/(k\_B\* 250.)\*1.E-6  
[private]

5.23.2.11 INTEGER, parameter messy\_jval::dim55 = 55 [private]

5.23.2.12 INTEGER, parameter messy\_jval::dim58 = 58 [private]

5.23.2.13 REAL, dimension(:,:), allocatable messy\_jval::dlv2 [private]

5.23.2.14 REAL, dimension(3), parameter messy\_jval::e\_la = (/ 8.21666E-21, 1.63296E-20,  
4.85121E-17 /) [private]

5.23.2.15 REAL, dimension(maxwav), save messy\_jval::f0 [private]

- 5.23.2.16 REAL, dimension(maxwav), parameter messy\_jval::f0max = (/6.97E+01, 5.1333, 1.7116E+01, 8.930, 2.6699E+01, 18.62, 48.184/) [private]
- 5.23.2.17 REAL, dimension(maxwav), parameter messy\_jval::f0min = (/7.2679E+01, 5.0584E+00, 1.7139E+01, 8.9395E+00, 2.6714E+01, 1.8595E+01, 4.8184E+01/) [private]
- 5.23.2.18 REAL(dp), dimension(:, :), pointer, public messy\_jval::fhuv\_2d
- 5.23.2.19 REAL(dp), dimension(:, :), pointer, public messy\_jval::fhuvdna\_2d
- 5.23.2.20 REAL, dimension(:, :, :), allocatable messy\_jval::fint [private]
- 5.23.2.21 REAL, dimension(:, :, :), allocatable messy\_jval::fint\_h [private]
- 5.23.2.22 REAL, dimension(:, :), allocatable messy\_jval::fj\_corr [private]
- 5.23.2.23 REAL, dimension(maxwav), save messy\_jval::flux [private]
- 5.23.2.24 REAL, dimension(maxwav), parameter messy\_jval::fmax = (/ 2.5400E+12, 2.2200E+14, 7.4700E+13, 8.9700E+13, 1.2600E+14, 1.1100E+15, 2.6700E+15/) [private]
- 5.23.2.25 REAL, dimension(maxwav), parameter messy\_jval::fmin = (/ 2.3400E+12, 2.2100E+14, 7.4300E+13, 8.9200E+13, 1.2600E+14, 1.1100E+15, 2.6700E+15/) [private]
- 5.23.2.26 INTEGER, dimension(:, :), allocatable messy\_jval::i0 [private]
- 5.23.2.27 INTEGER, dimension(:, :), allocatable messy\_jval::i1 [private]
- 5.23.2.28 INTEGER, dimension(:, :), allocatable messy\_jval::i2 [private]
- 5.23.2.29 INTEGER, dimension(:, :), allocatable messy\_jval::i3 [private]
- 5.23.2.30 INTEGER, dimension(:), allocatable messy\_jval::iu0 [private]
- 5.23.2.31 TYPE(PTR\_2D\_ARRAY), dimension(:), pointer, save, public messy\_jval::jval\_2d
- 5.23.2.32 INTEGER messy\_jval::klev [private]
- 5.23.2.33 INTEGER messy\_jval::kproma\_day [private]
- 5.23.2.34 LOGICAL, dimension(ip\_max), save, public messy\_jval::lp = .FALSE.
- 5.23.2.35 INTEGER, parameter messy\_jval::MAXWAV = 7 [private]
- 5.23.2.36 CHARACTER(LEN=\*), parameter, public messy\_jval::modstr = 'jval'

- 5.23.2.37 CHARACTER(LEN=\*), parameter, public messy\_jval::modver = '14'
- 5.23.2.38 REAL, save messy\_jval::phi\_la [private]
- 5.23.2.39 REAL, dimension(:,:), allocatable messy\_jval::press [private]
- 5.23.2.40 REAL, parameter messy\_jval::press\_ref = 1.E4 [private]
- 5.23.2.41 INTEGER, save, public messy\_jval::qy\_CH3COCH3 = 1
- 5.23.2.42 REAL, dimension(:,:), allocatable messy\_jval::r\_m [private]
- 5.23.2.43 REAL, dimension(:,:), allocatable messy\_jval::r\_o2 [private]
- 5.23.2.44 REAL(DP), save, public messy\_jval::r\_sol = 0.5\_dp
- 5.23.2.45 REAL(dp), dimension(:,:), pointer, public messy\_jval::rh\_o2\_2d
- 5.23.2.46 REAL(dp), dimension(:,:), pointer, public messy\_jval::rh\_o3\_2d
- 5.23.2.47 REAL, dimension(:,:), allocatable messy\_jval::sig\_top\_o2 [private]
- 5.23.2.48 REAL, dimension(:,:), allocatable messy\_jval::sig\_top\_o3 [private]
- 5.23.2.49 REAL, save messy\_jval::SR\_toa\_flux [private]
- 5.23.2.50 REAL, dimension(:,:), allocatable messy\_jval::temp [private]
- 5.23.2.51 REAL, dimension(:,:), allocatable messy\_jval::tnorm [private]
- 5.23.2.52 REAL, dimension(:,:), allocatable messy\_jval::tnorm\_sr [private]
- 5.23.2.53 REAL, dimension(:,:), allocatable messy\_jval::v2s\_m [private]
- 5.23.2.54 REAL, dimension(:,:), allocatable messy\_jval::v3\_du1 [private]
- 5.23.2.55 REAL, dimension(:,:), allocatable messy\_jval::v3\_du2 [private]

The documentation for this module was generated from the following file:

- /home/sander/e2/messy\_d2.50s\_rs/messy/mbm/caaba/[messy\\_jval.f90](#)

## 5.24 messy\_jval\_box Module Reference

### Public Member Functions

- subroutine, public [jval\\_init](#)

- subroutine, public [jval\\_physc](#)
- subroutine, public [jval\\_finish](#)
- subroutine, public [jval\\_result](#)

### Private Attributes

- INTEGER [ncid\\_jval](#)
- INTEGER, parameter [nsza](#) = 1
- INTEGER [nlev](#)
- REAL(DP), dimension(:, :), allocatable [v3](#)
- REAL(DP), dimension(:, :), allocatable [jpress](#)
- REAL(DP), dimension(:, :), allocatable [relo3](#)
- REAL(DP), dimension(:, :), allocatable [jrhum](#)
- REAL(DP), dimension(:, :), allocatable [jtemp](#)
- REAL(DP), dimension(:), allocatable [albedo](#)
- REAL(DP), dimension(:, :), allocatable [aclc](#)
- REAL(DP), dimension(:), allocatable [slf](#)
- REAL(DP), dimension(:, :), allocatable [clp](#)
- LOGICAL [lmidatm](#)
- LOGICAL [l\\_heating](#)
- INTEGER [pbllev](#)

### 5.24.1 Member Function/Subroutine Documentation

5.24.1.1 subroutine, public [messy\\_jval\\_box::jval\\_finish](#) ( )

5.24.1.2 subroutine, public [messy\\_jval\\_box::jval\\_init](#) ( )

Here is the call graph for this function:

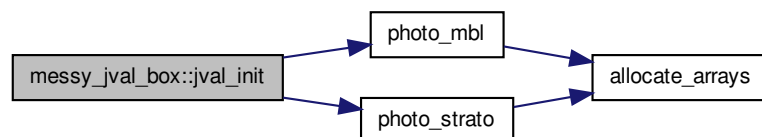

5.24.1.3 subroutine, public messy\_jval\_box::jval\_physc ( )

5.24.1.4 subroutine, public messy\_jval\_box::jval\_result ( )

## 5.24.2 Member Data Documentation

5.24.2.1 REAL(DP), dimension(:,,:), allocatable messy\_jval\_box::aclc [private]

5.24.2.2 REAL(DP), dimension(:,), allocatable messy\_jval\_box::albedo [private]

5.24.2.3 REAL(DP), dimension(:,,:), allocatable messy\_jval\_box::clp [private]

5.24.2.4 REAL(DP), dimension(:,,:), allocatable messy\_jval\_box::jpress [private]

5.24.2.5 REAL(DP), dimension(:,,:), allocatable messy\_jval\_box::jrhumi [private]

5.24.2.6 REAL(DP), dimension(:,,:), allocatable messy\_jval\_box::jtemp [private]

5.24.2.7 LOGICAL messy\_jval\_box::l\_heating [private]

5.24.2.8 LOGICAL messy\_jval\_box::lmidatm [private]

5.24.2.9 INTEGER messy\_jval\_box::ncid\_jval [private]

5.24.2.10 INTEGER messy\_jval\_box::nlev [private]

5.24.2.11 INTEGER, parameter messy\_jval\_box::nsza = 1 [private]

5.24.2.12 INTEGER messy\_jval\_box::pbllev [private]

5.24.2.13 REAL(DP), dimension(:,,:), allocatable messy\_jval\_box::relo3 [private]

5.24.2.14 REAL(DP), dimension(:,), allocatable messy\_jval\_box::slf [private]

5.24.2.15 REAL(DP), dimension(:,,:), allocatable messy\_jval\_box::v3 [private]

The documentation for this module was generated from the following file:

- /home/sander/e2/messy\_d2.50s\_rs/messy/mbm/caaba/[messy\\_jval\\_box.f90](#)

## 5.25 messy\_main\_blather Module Reference

### Public Member Functions

- subroutine, public [start\\_message](#) (modstr, str, substr, l\_print)
- subroutine, public [end\\_message](#) (modstr, str, substr, l\_print)

- subroutine, public [info](#) (string, substr, *I\_print*)
- subroutine, public [warning](#) (string, substr, *I\_print*)

### 5.25.1 Member Function/Subroutine Documentation

- 5.25.1.1 subroutine, public `messy_main_blather::end_message` ( CHARACTER(LEN=\*),  
intent(in) *modstr*, CHARACTER(LEN=\*), intent(in) *str*, CHARACTER(LEN=\*), intent(in)  
*substr*, LOGICAL, intent(in), optional *I\_print* )
- 5.25.1.2 subroutine, public `messy_main_blather::info` ( CHARACTER(LEN=\*), intent(in)  
*string*, CHARACTER(LEN=\*), intent(in), optional *substr*, LOGICAL, intent(in), optional  
*I\_print* )
- 5.25.1.3 subroutine, public `messy_main_blather::start_message` ( CHARACTER(LEN=\*),  
intent(in) *modstr*, CHARACTER(LEN=\*), intent(in) *str*, CHARACTER(LEN=\*), intent(in)  
*substr*, LOGICAL, intent(in), optional *I\_print* )
- 5.25.1.4 subroutine, public `messy_main_blather::warning` ( CHARACTER(LEN=\*),  
intent(in) *string*, CHARACTER(LEN=\*), intent(in) *substr*, LOGICAL, intent(in), optional  
*I\_print* )

The documentation for this module was generated from the following file:

- [/home/sander/e2/messy\\_d2.50s\\_rs/messy/mbm/caaba/messy\\_main\\_blather.f90](#)

## 5.26 messy\_main\_constants\_mem Module Reference

### Public Attributes

- CHARACTER(LEN=\*), parameter [modstr](#) = 'MESSy'
- CHARACTER(LEN=\*), parameter [modver](#) = 'd2.50s'
- INTEGER, parameter [sp](#) = SELECTED\_REAL\_KIND(6, 37)
- INTEGER, parameter [dp](#) = SELECTED\_REAL\_KIND(12, 307)
- INTEGER, parameter [i4](#) = SELECTED\_INT\_KIND(9)
- INTEGER, parameter [i8](#) = SELECTED\_INT\_KIND(14)
- INTEGER, parameter [wp](#) = [dp](#)
- REAL(DP), parameter [TINY\\_DP](#) = TINY(0.\_dp)
- REAL(DP), parameter [HUGE\\_DP](#) = HUGE(0.\_dp)
- REAL(DP), parameter [BIG\\_DP](#) = 1E40\_dp
- INTEGER, parameter [nerr](#) = 6
- REAL(DP), parameter [FLAGGED\\_BAD](#) = -1.0E+34\_dp
- CHARACTER(LEN=\*), parameter [HLINE1](#) = '\*\*\*\*\*'  
'\*\*\*\*\*'
- CHARACTER(LEN=\*), parameter [HLINE2](#) = '-----'// '-----'  
-----'

- CHARACTER(LEN=\*), parameter `HLINE3` = '.....'//  
'.....'
- INTEGER, parameter `STRLEN_SHORT` = 8
- INTEGER, parameter `STRLEN_MEDIUM` = 24
- INTEGER, parameter `STRLEN_LONG` = 64
- INTEGER, parameter `STRLEN_VLONG` = 80
- INTEGER, parameter `STRLEN_ULONG` = 256
- INTEGER, parameter `STRLEN_XLONG` = 512
- INTEGER, parameter `STRLEN_KPPSPECIES` = 15
- REAL(dp), parameter `pi` = 3.14159265358979323846\_dp
- REAL(dp), parameter `R_gas` = 8.3144621\_dp
- REAL(dp), parameter `h_Planck` = 6.62606957E34\_dp
- REAL(dp), parameter `c_light` = 2.99792458E8\_dp
- REAL(dp), parameter `stbo` = 5.670373E-8\_dp
- REAL(dp), parameter `N_A` = 6.02214129E23\_dp
- REAL(dp), parameter `N_A_kmol` = 6.02214129E26\_dp
- REAL(dp), parameter `g` = 9.80665\_dp
- REAL(dp), parameter `T0` = 298.15\_dp
- REAL(dp), parameter `T0_INV` = 1.\_DP / `T0`
- REAL(dp), parameter `atm2Pa` = 101325.\_dp
- REAL(dp), parameter `cal2J` = 4.1868\_dp
- REAL(dp), parameter `k_B` = 1.3806488E-23\_dp
- REAL(dp), parameter `c_vKar` = 0.4\_dp
- REAL(dp), parameter `stDTDZ` = 0.0065\_dp
- REAL(dp), parameter `MH` = 1.01\_dp
- REAL(dp), parameter `MD` = 2.01\_dp
- REAL(dp), parameter `M13C` = 13.00\_dp
- REAL(dp), parameter `M12C` = 12.00\_dp
- REAL(dp), parameter `MC` = 12.01\_dp
- REAL(dp), parameter `MN` = 14.01\_dp
- REAL(dp), parameter `M18O` = 18.00\_dp
- REAL(dp), parameter `MF` = 19.00\_dp
- REAL(dp), parameter `MNa` = 22.99\_dp
- REAL(dp), parameter `MO` = 16.00\_dp
- REAL(dp), parameter `MS` = 32.07\_dp
- REAL(dp), parameter `MCl` = 35.45\_dp
- REAL(dp), parameter `MBr` = 79.90\_dp
- REAL(dp), parameter `MI` = 126.90\_dp
- REAL(dp), parameter `MHg` = 200.59\_dp
- REAL(dp), parameter `M_O3` = `MO*3._dp`
- REAL(dp), parameter `M_O2` = `MO*2._dp`
- REAL(dp), parameter `M_H2O` = `MH*2._dp + MO`
- REAL(dp), parameter `M_HDO` = `MH + MD + MO`
- REAL(dp), parameter `M_HH18O` = `MH*2._dp + M18O`
- REAL(dp), parameter `M_N2` = `MN*2._dp`
- REAL(dp), parameter `tmelt` = 273.15\_dp

- REAL(dp), parameter `ttrip` = 273.16\_dp
- REAL(dp), parameter `rho_H2O` = 999.97\_dp
- REAL(dp), parameter `rho_sea` = 1025.\_dp
- REAL(dp), parameter `M_air` = 28.970\_dp
- REAL(dp), parameter `cp_air` = 1005.46\_dp
- REAL(dp), parameter `alv` = 2.5008e6\_dp
- REAL(dp), parameter `als` = 2.8345e6\_dp
- REAL(dp), parameter `alf` = `als-alv`
- REAL(dp), parameter `rd` = 1000.\_dp \* `R_gas/M_air`
- REAL(dp), parameter `rv` = 1000.\_dp \* `R_gas/M_H2O`
- REAL(dp), parameter `cpv` = 1869.46\_dp
- REAL(dp), parameter `vtmpc1` = `M_air / M_H2O - 1.0`\_dp
- REAL(dp), parameter `vtmpc2` = `cpv/cp_air-1.0`\_dp
- REAL(dp), parameter `MM_eps` = `M_H2O/M_air`
- REAL(dp), save `ceffmin` = 10.0\_dp
- REAL(dp), parameter `ceffmax` = 150.0\_dp
- REAL(dp), save `ccwmin` = 1.0e-7\_dp
- REAL(dp), parameter `cemiss` = 0.996\_dp
- REAL(dp), parameter `radius_earth` = 6371000.0\_dp
- REAL(dp), parameter `OneDay` = 86400.0\_dp
- REAL(dp), parameter `OneSiderialDay` = 86164.0\_dp
- REAL(dp), parameter `omega` = 0.7292E-4\_dp
- REAL(dp), parameter `solc` = 1365.0\_dp
- REAL(dp), parameter `crae` = 0.1277e-02\_dp
- REAL(dp), parameter `clw` = 4186.84\_dp
- REAL(dp), parameter `csw` = 3994.\_dp
- REAL(dp), parameter `ctfreez` = 271.38\_dp
- REAL(dp), parameter `AM` = 1.673e-27
- REAL(dp), parameter `ELCH` = 1.602E-19
- REAL(dp), parameter `TWOPI` = `pi*2.`\_dp
- REAL(dp), parameter `PI_2` = `pi*0.5`\_dp
- REAL(dp), parameter `DTR` = `pi/180.`\_dp
- REAL(dp), parameter `RTD` = 180.\_dp/`pi`

### 5.26.1 Member Data Documentation

5.26.1.1 REAL(dp), parameter `messy_main_constants_mem::alf` = `als-alv`

5.26.1.2 REAL(dp), parameter `messy_main_constants_mem::als` = 2.8345e6\_dp

5.26.1.3 REAL(dp), parameter `messy_main_constants_mem::alv` = 2.5008e6\_dp

5.26.1.4 REAL(dp), parameter `messy_main_constants_mem::AM` = 1.673e-27

5.26.1.5 REAL(dp), parameter `messy_main_constants_mem::atm2Pa` = 101325.\_dp



- 5.26.1.6 REAL(DP), parameter messy\_main\_constants\_mem::BIG\_DP = 1E40\_dp
- 5.26.1.7 REAL(dp), parameter messy\_main\_constants\_mem::c\_light = 2.99792458E8\_dp
- 5.26.1.8 REAL(dp), parameter messy\_main\_constants\_mem::c\_vKar = 0.4\_dp
- 5.26.1.9 REAL(dp), parameter messy\_main\_constants\_mem::cal2J = 4.1868\_dp
- 5.26.1.10 REAL(dp), save messy\_main\_constants\_mem::ccwmin = 1.0e-7\_dp
- 5.26.1.11 REAL(dp), parameter messy\_main\_constants\_mem::ceffmax = 150.0\_dp
- 5.26.1.12 REAL(dp), save messy\_main\_constants\_mem::ceffmin = 10.0\_dp
- 5.26.1.13 REAL(dp), parameter messy\_main\_constants\_mem::cemiss = 0.996\_dp
- 5.26.1.14 REAL(dp), parameter messy\_main\_constants\_mem::clw = 4186.84\_dp
- 5.26.1.15 REAL(dp), parameter messy\_main\_constants\_mem::cp\_air = 1005.46\_dp
- 5.26.1.16 REAL(dp), parameter messy\_main\_constants\_mem::cpv = 1869.46\_dp
- 5.26.1.17 REAL(dp), parameter messy\_main\_constants\_mem::crae = 0.1277e-02\_dp
- 5.26.1.18 REAL(dp), parameter messy\_main\_constants\_mem::csw = 3994.\_dp
- 5.26.1.19 REAL(dp), parameter messy\_main\_constants\_mem::ctfreez = 271.38\_dp
- 5.26.1.20 INTEGER, parameter messy\_main\_constants\_mem::dp =  
SELECTED\_REAL\_KIND(12, 307)
- 5.26.1.21 REAL(dp), parameter messy\_main\_constants\_mem::DTR = pi/180.\_dp
- 5.26.1.22 REAL(dp), parameter messy\_main\_constants\_mem::ELCH = 1.602E-19
- 5.26.1.23 REAL(DP), parameter messy\_main\_constants\_mem::FLAGGED\_BAD =  
-1.0E+34\_dp
- 5.26.1.24 REAL(dp), parameter messy\_main\_constants\_mem::g = 9.80665\_dp
- 5.26.1.25 REAL(dp), parameter messy\_main\_constants\_mem::h\_Planck =  
6.62606957E34\_dp
- 5.26.1.26 CHARACTER(LEN=\*), parameter messy\_main\_constants\_mem::HLINE1  
= '\*\*\*\*\*'//  
'\*\*\*\*\*'

- 5.26.1.27 CHARACTER(LEN=\*), parameter messy\_main\_constants\_mem::HLINE2 =  
'-----'// '-----'
- 5.26.1.28 CHARACTER(LEN=\*), parameter messy\_main\_constants\_mem::HLINE3 =  
'-----'// '-----'
- 5.26.1.29 REAL(DP), parameter messy\_main\_constants\_mem::HUGE\_DP =  
HUGE(0.\_dp)
- 5.26.1.30 INTEGER, parameter messy\_main\_constants\_mem::i4 =  
SELECTED\_INT\_KIND(9)
- 5.26.1.31 INTEGER, parameter messy\_main\_constants\_mem::i8 =  
SELECTED\_INT\_KIND(14)
- 5.26.1.32 REAL(dp), parameter messy\_main\_constants\_mem::k\_B = 1.3806488E-23\_dp
- 5.26.1.33 REAL(dp), parameter messy\_main\_constants\_mem::M12C = 12.00\_dp
- 5.26.1.34 REAL(dp), parameter messy\_main\_constants\_mem::M13C = 13.00\_dp
- 5.26.1.35 REAL(dp), parameter messy\_main\_constants\_mem::M18O = 18.00\_dp
- 5.26.1.36 REAL(dp), parameter messy\_main\_constants\_mem::M\_air = 28.970\_dp
- 5.26.1.37 REAL(dp), parameter messy\_main\_constants\_mem::M\_H2O = MH\*2.\_dp +  
MO
- 5.26.1.38 REAL(dp), parameter messy\_main\_constants\_mem::M\_HDO = MH + MD +  
MO
- 5.26.1.39 REAL(dp), parameter messy\_main\_constants\_mem::M\_HH18O = MH\*2.\_dp+  
M18O
- 5.26.1.40 REAL(dp), parameter messy\_main\_constants\_mem::M\_N2 = MN\*2.\_dp
- 5.26.1.41 REAL(dp), parameter messy\_main\_constants\_mem::M\_O2 = MO\*2.\_dp
- 5.26.1.42 REAL(dp), parameter messy\_main\_constants\_mem::M\_O3 = MO\*3.\_dp
- 5.26.1.43 REAL(dp), parameter messy\_main\_constants\_mem::MBr = 79.90\_dp
- 5.26.1.44 REAL(dp), parameter messy\_main\_constants\_mem::MC = 12.01\_dp
- 5.26.1.45 REAL(dp), parameter messy\_main\_constants\_mem::MCI = 35.45\_dp
- 5.26.1.46 REAL(dp), parameter messy\_main\_constants\_mem::MD = 2.01\_dp

- 5.26.1.47 REAL(dp), parameter messy\_main\_constants\_mem::MF = 19.00\_dp
- 5.26.1.48 REAL(dp), parameter messy\_main\_constants\_mem::MH = 1.01\_dp
- 5.26.1.49 REAL(dp), parameter messy\_main\_constants\_mem::MHg = 200.59\_dp
- 5.26.1.50 REAL(dp), parameter messy\_main\_constants\_mem::MI = 126.90\_dp
- 5.26.1.51 REAL(dp), parameter messy\_main\_constants\_mem::MM\_eps =  
M\_H2O/M\_air
- 5.26.1.52 REAL(dp), parameter messy\_main\_constants\_mem::MN = 14.01\_dp
- 5.26.1.53 REAL(dp), parameter messy\_main\_constants\_mem::MNa = 22.99\_dp
- 5.26.1.54 REAL(dp), parameter messy\_main\_constants\_mem::MO = 16.00\_dp
- 5.26.1.55 CHARACTER(LEN=\*), parameter messy\_main\_constants\_mem::modstr =  
'MESSy'
- 5.26.1.56 CHARACTER(LEN=\*), parameter messy\_main\_constants\_mem::modver =  
'd2.50s'
- 5.26.1.57 REAL(dp), parameter messy\_main\_constants\_mem::MS = 32.07\_dp
- 5.26.1.58 REAL(dp), parameter messy\_main\_constants\_mem::N\_A = 6.02214129E23\_dp
- 5.26.1.59 REAL(dp), parameter messy\_main\_constants\_mem::N\_A\_kmol =  
6.02214129E26\_dp
- 5.26.1.60 INTEGER, parameter messy\_main\_constants\_mem::nerr = 6
- 5.26.1.61 REAL(dp), parameter messy\_main\_constants\_mem::omega = 0.7292E-4\_dp
- 5.26.1.62 REAL(dp), parameter messy\_main\_constants\_mem::OneDay = 86400.0\_dp
- 5.26.1.63 REAL(dp), parameter messy\_main\_constants\_mem::OneSiderialDay =  
86164.0\_dp
- 5.26.1.64 REAL(dp), parameter messy\_main\_constants\_mem::pi =  
3.14159265358979323846\_dp
- 5.26.1.65 REAL(dp), parameter messy\_main\_constants\_mem::PI\_2 = pi\*0.5\_dp
- 5.26.1.66 REAL(dp), parameter messy\_main\_constants\_mem::R\_gas = 8.3144621\_dp
- 5.26.1.67 REAL(dp), parameter messy\_main\_constants\_mem::radius\_earth =  
6371000.0\_dp

- 5.26.1.68 REAL(dp), parameter messy\_main\_constants\_mem::rd = 1000.\_dp \*  
R\_gas/M\_air
- 5.26.1.69 REAL(dp), parameter messy\_main\_constants\_mem::rho\_H2O = 999.97\_dp
- 5.26.1.70 REAL(dp), parameter messy\_main\_constants\_mem::rho\_sea = 1025.\_dp
- 5.26.1.71 REAL(dp), parameter messy\_main\_constants\_mem::RTD = 180.\_dp/pi
- 5.26.1.72 REAL(dp), parameter messy\_main\_constants\_mem::rv = 1000.\_dp \*  
R\_gas/M\_H2O
- 5.26.1.73 REAL(dp), parameter messy\_main\_constants\_mem::solc = 1365.0\_dp
- 5.26.1.74 INTEGER, parameter messy\_main\_constants\_mem::sp =  
SELECTED\_REAL\_KIND(6, 37)
- 5.26.1.75 REAL(dp), parameter messy\_main\_constants\_mem::stbo = 5.670373E-8\_dp
- 5.26.1.76 REAL(dp), parameter messy\_main\_constants\_mem::stDTDZ = 0.0065\_dp
- 5.26.1.77 INTEGER, parameter messy\_main\_constants\_mem::STRLEN\_KPPSPECIE-  
S = 15
- 5.26.1.78 INTEGER, parameter messy\_main\_constants\_mem::STRLEN\_LONG = 64
- 5.26.1.79 INTEGER, parameter messy\_main\_constants\_mem::STRLEN\_MEDIUM = 24
- 5.26.1.80 INTEGER, parameter messy\_main\_constants\_mem::STRLEN\_SHORT = 8
- 5.26.1.81 INTEGER, parameter messy\_main\_constants\_mem::STRLEN\_ULONG = 256
- 5.26.1.82 INTEGER, parameter messy\_main\_constants\_mem::STRLEN\_VLONG = 80
- 5.26.1.83 INTEGER, parameter messy\_main\_constants\_mem::STRLEN\_XLONG = 512
- 5.26.1.84 REAL(dp), parameter messy\_main\_constants\_mem::T0 = 298.15\_dp
- 5.26.1.85 REAL(dp), parameter messy\_main\_constants\_mem::T0\_INV = 1.\_DP / T0
- 5.26.1.86 REAL(DP), parameter messy\_main\_constants\_mem::TINY\_DP = TINY(0.\_dp)
- 5.26.1.87 REAL(dp), parameter messy\_main\_constants\_mem::tmelt = 273.15\_dp
- 5.26.1.88 REAL(dp), parameter messy\_main\_constants\_mem::ttrip = 273.16\_dp
- 5.26.1.89 REAL(dp), parameter messy\_main\_constants\_mem::TWOPI = pi\*2.\_dp

5.26.1.90 REAL(dp), parameter messy\_main\_constants\_mem::vtmpc1 = M\_air /  
M\_H2O - 1.0\_dp

5.26.1.91 REAL(dp), parameter messy\_main\_constants\_mem::vtmpc2 =  
cpv/cp\_air-1.0\_dp

5.26.1.92 INTEGER, parameter messy\_main\_constants\_mem::wp = dp

The documentation for this module was generated from the following file:

- [/home/sander/e2/messy\\_d2.50s\\_rs/messy/mbm/caaba/messy\\_main\\_constants-\\_mem.f90](#)

## 5.27 messy\_main\_control\_cb Module Reference

### Public Member Functions

- subroutine [messy\\_init](#)
- subroutine [messy\\_physc](#)
- subroutine [messy\\_result](#)
- subroutine [messy\\_finish](#)

### 5.27.1 Member Function/Subroutine Documentation

5.27.1.1 subroutine messy\_main\_control\_cb::messy\_finish ( )

5.27.1.2 subroutine messy\_main\_control\_cb::messy\_init ( )

5.27.1.3 subroutine messy\_main\_control\_cb::messy\_physc ( )

5.27.1.4 subroutine messy\_main\_control\_cb::messy\_result ( )

The documentation for this module was generated from the following file:

- [/home/sander/e2/messy\\_d2.50s\\_rs/messy/mbm/caaba/messy\\_main\\_control\\_-cb.f90](#)

## 5.28 messy\_main\_rnd Module Reference

### Data Types

- interface [rnd\\_jump](#)

### Public Member Functions

- subroutine, public `rnd_init` (status, id, method, pseed)
- subroutine, public `rnd_seed` (id, size, put, get)
- subroutine `rnd_jump_2` (status, id, n, p, get)
- subroutine, public `rnd_number` (id, harvest, get)
- subroutine, public `rnd_finish` (id)

### Public Attributes

- CHARACTER(LEN=\*), parameter, public `modstr` = 'rnd'
- CHARACTER(len=\*), parameter, public `modver` = '1.1'
- INTEGER, parameter, public `RND_F90` = 1
- INTEGER, parameter, public `RND_MTW` = 2
- INTEGER, parameter, public `RND_LUX` = 3
- INTEGER, parameter, public `RND_F90_GAUSS` = 4
- INTEGER, parameter, public `RND_MTW_GAUSS` = 5
- INTEGER, parameter, public `RND_LUX_GAUSS` = 6
- INTEGER, parameter, public `RND_MAX_METHOD` = 6
- CHARACTER(LEN=12), dimension(rnd\_max\_method), public `RND_REPR_NAME` = (/ 'REPR\_RND\_F90', 'REPR\_RND\_MTW', 'REPR\_RND\_LUX', 'REPR\_RND\_F90', 'REPR\_RND\_MTW', 'REPR\_RND\_LUX' /)
- CHARACTER(LEN=11), dimension(rnd\_max\_method), public `RND_DIM_NAME` = (/ 'DIM\_RND\_F90', 'DIM\_RND\_MTW', 'DIM\_RND\_LUX', 'DIM\_RND\_F90', 'DIM\_RND\_MTW', 'DIM\_RND\_LUX' /)
- INTEGER, parameter, public `ID_MAX` = 20
- INTEGER, dimension(id\_max), public `nstate` = 0
- INTEGER, dimension(id\_max), public `rnd_method`
- TYPE(PTR\_1D\_ARRAY\_INT), dimension(id\_max), public `state`

### Private Member Functions

- subroutine `rnd_jump_n` (status, id, n, get)

### Private Attributes

- INTEGER, parameter `N_MAX_EXP` = 20
- LOGICAL, dimension(n\_max\_exp) `lpoly` = .FALSE.
- INTEGER, dimension(0:nn, n\_max\_exp) `pcoeff`

### 5.28.1 Member Function/Subroutine Documentation

- 5.28.1.1 subroutine, public messy\_main\_rnd::rnd\_finish ( INTEGER, intent(in) *id* )
- 5.28.1.2 subroutine, public messy\_main\_rnd::rnd\_init ( INTEGER, intent(out) *status*, INTEGER, intent(out) *id*, INTEGER, intent(in) *method*, INTEGER, intent(in), optional *pseed* )
- 5.28.1.3 subroutine messy\_main\_rnd::rnd\_jump\_2 ( INTEGER, intent(out) *status*, INTEGER, intent(in) *id*, INTEGER, intent(in) *n*, INTEGER, intent(in) *p*, INTEGER, dimension(:), intent(out), optional *get* )
- 5.28.1.4 subroutine messy\_main\_rnd::rnd\_jump\_n ( INTEGER, intent(out) *status*, INTEGER, intent(in) *id*, INTEGER, intent(in) *n*, INTEGER, dimension(:), intent(out), optional *get* ) [private]
- 5.28.1.5 subroutine, public messy\_main\_rnd::rnd\_number ( INTEGER, intent(in) *id*, REAL(DP), dimension(:), intent(out) *harvest*, INTEGER, dimension(:), intent(out), optional *get* )
- 5.28.1.6 subroutine, public messy\_main\_rnd::rnd\_seed ( INTEGER, intent(in) *id*, INTEGER, intent(out), optional *size*, INTEGER, dimension(:), intent(in), optional *put*, INTEGER, dimension(:), intent(out), optional *get* )

### 5.28.2 Member Data Documentation

- 5.28.2.1 INTEGER, parameter, public messy\_main\_rnd::ID\_MAX = 20
- 5.28.2.2 LOGICAL, dimension(n\_max\_exp) messy\_main\_rnd::lpoly = .FALSE. [private]
- 5.28.2.3 CHARACTER(LEN=\*), parameter, public messy\_main\_rnd::modstr = 'rnd'
- 5.28.2.4 CHARACTER(len=\*), parameter, public messy\_main\_rnd::modver = '1.1'
- 5.28.2.5 INTEGER, parameter messy\_main\_rnd::N\_MAX\_EXP = 20 [private]
- 5.28.2.6 INTEGER, dimension(id\_max), public messy\_main\_rnd::nstate = 0
- 5.28.2.7 INTEGER, dimension(0:nn, n\_max\_exp) messy\_main\_rnd::pcoeff [private]
- 5.28.2.8 CHARACTER(LEN=11), dimension(rnd\_max\_method), public messy\_main\_rnd::RND\_DIM\_NAME = (/ 'DIM\_RND\_F90', 'DIM\_RND\_MTW', 'DIM\_RND\_LUX', 'DIM\_RND\_F90', 'DIM\_RND\_MTW', 'DIM\_RND\_LUX' /)
- 5.28.2.9 INTEGER, parameter, public messy\_main\_rnd::RND\_F90 = 1
- 5.28.2.10 INTEGER, parameter, public messy\_main\_rnd::RND\_F90\_GAUSS = 4

- 5.28.2.11 INTEGER, parameter, public messy\_main\_rnd::RND\_LUX = 3
- 5.28.2.12 INTEGER, parameter, public messy\_main\_rnd::RND\_LUX\_GAUSS = 6
- 5.28.2.13 INTEGER, parameter, public messy\_main\_rnd::RND\_MAX\_METHOD = 6
- 5.28.2.14 INTEGER, dimension(id\_max), public messy\_main\_rnd::rnd\_method
- 5.28.2.15 INTEGER, parameter, public messy\_main\_rnd::RND\_MTW = 2
- 5.28.2.16 INTEGER, parameter, public messy\_main\_rnd::RND\_MTW\_GAUSS = 5
- 5.28.2.17 CHARACTER(LEN=12), dimension(rnd\_max\_method), public  
messy\_main\_rnd::RND\_REPR\_NAME = (/ 'REPR\_RND\_F90', 'REPR\_RND\_MTW',  
'REPR\_RND\_LUX', 'REPR\_RND\_F90', 'REPR\_RND\_MTW', 'REPR\_RND\_LUX' /)
- 5.28.2.18 TYPE(PTR\_1D\_ARRAY\_INT), dimension(id\_max), public messy\_main\_rnd::state

The documentation for this module was generated from the following file:

- /home/sander/e2/messy\_d2.50s\_rs/messy/mbm/caaba/[messy\\_main\\_rnd.f90](#)

## 5.29 messy\_main\_rnd\_lux Module Reference

### Public Member Functions

- subroutine [ranlux](#) (rvec, lenv)
- subroutine [rluxin](#)
- subroutine [rluxut](#)
- subroutine [rluxat](#) (lout, inout, k1, k2)
- subroutine [rluxgo](#) (lux, ins, k1, k2)

### Public Attributes

- INTEGER, dimension(25), public [isdext](#)
- INTEGER, parameter [maxlev](#) = 4
- INTEGER, parameter [lxdflt](#) = 3
- INTEGER, parameter [jsdflt](#) = 314159265
- INTEGER, dimension(0:[maxlev](#)), public [ndskip](#) = (/ 0, 24, 73, 199, 365 /)
- INTEGER [igiga](#) = 1000000000
- INTEGER, public [i24](#) = 24
- INTEGER, public [j24](#) = 10
- REAL, parameter [twop12](#) = 4096.
- INTEGER, parameter [itwo24](#) = 2\*\*24
- INTEGER, parameter [icons](#) = 2147483563



- INTEGER, dimension(24), save, public `next`
- INTEGER, save, public `luxlev = lxdflt`
- INTEGER, save, public `nskip`
- INTEGER, save, public `inseed`
- INTEGER, save `jseed`
- LOGICAL, save, public `notyet = .true.`
- INTEGER, public `in24 = 0`
- INTEGER, public `kount = 0`
- INTEGER, public `mkount = 0`
- REAL, dimension(24), save, public `seeds`
- REAL, save, public `carry = 0.`
- REAL, save, public `twom24`
- REAL, save, public `twom12`

### 5.29.1 Member Function/Subroutine Documentation

- 5.29.1.1 subroutine `messy_main_rnd_lux::ranlux` ( REAL, dimension(lenv), intent(out) *rvec*, INTEGER, intent(in) *lenv* )
- 5.29.1.2 subroutine `messy_main_rnd_lux::rluxat` ( INTEGER, intent(out) *lout*, INTEGER, intent(out) *inout*, INTEGER, intent(out) *k1*, INTEGER, intent(out) *k2* )
- 5.29.1.3 subroutine `messy_main_rnd_lux::rluxgo` ( INTEGER, intent(in) *lux*, INTEGER, intent(in) *ins*, INTEGER, intent(in) *k1*, INTEGER, intent(in) *k2* )
- 5.29.1.4 subroutine `messy_main_rnd_lux::rluxin` ( )
- 5.29.1.5 subroutine `messy_main_rnd_lux::rluxut` ( )

### 5.29.2 Member Data Documentation

- 5.29.2.1 REAL, save, public `messy_main_rnd_lux::carry = 0.`
- 5.29.2.2 INTEGER, public `messy_main_rnd_lux::i24 = 24`
- 5.29.2.3 INTEGER, parameter `messy_main_rnd_lux::icons = 2147483563`
- 5.29.2.4 INTEGER `messy_main_rnd_lux::igiga = 1000000000`
- 5.29.2.5 INTEGER, public `messy_main_rnd_lux::in24 = 0`
- 5.29.2.6 INTEGER, save, public `messy_main_rnd_lux::inseed`
- 5.29.2.7 INTEGER, dimension(25), public `messy_main_rnd_lux::isdext`
- 5.29.2.8 INTEGER, parameter `messy_main_rnd_lux::itwo24 = 2**24`

- 5.29.2.9 INTEGER, public messy\_main\_rnd\_lux::j24 = 10
- 5.29.2.10 INTEGER, parameter messy\_main\_rnd\_lux::jsdfit = 314159265
- 5.29.2.11 INTEGER, save messy\_main\_rnd\_lux::jseed
- 5.29.2.12 INTEGER, public messy\_main\_rnd\_lux::kount = 0
- 5.29.2.13 INTEGER, save, public messy\_main\_rnd\_lux::luxlev = lxdflt
- 5.29.2.14 INTEGER, parameter messy\_main\_rnd\_lux::lxdflt = 3
- 5.29.2.15 INTEGER, parameter messy\_main\_rnd\_lux::maxlev = 4
- 5.29.2.16 INTEGER, public messy\_main\_rnd\_lux::mkount = 0
- 5.29.2.17 INTEGER, dimension(0:maxlev), public messy\_main\_rnd\_lux::ndskip = (/ 0, 24, 73, 199, 365 /)
- 5.29.2.18 INTEGER, dimension(24), save, public messy\_main\_rnd\_lux::next
- 5.29.2.19 LOGICAL, save, public messy\_main\_rnd\_lux::notyet = .true.
- 5.29.2.20 INTEGER, save, public messy\_main\_rnd\_lux::nskip
- 5.29.2.21 REAL, dimension(24), save, public messy\_main\_rnd\_lux::seeds
- 5.29.2.22 REAL, save, public messy\_main\_rnd\_lux::twom12
- 5.29.2.23 REAL, save, public messy\_main\_rnd\_lux::twom24
- 5.29.2.24 REAL, parameter messy\_main\_rnd\_lux::twop12 = 4096.

The documentation for this module was generated from the following file:

- [/home/sander/e2/messy\\_d2.50s\\_rs/messy/mbm/caaba/messy\\_main\\_rnd\\_lux.-f90](#)

## 5.30 messy\_main\_rnd\_mtw Module Reference

### Public Member Functions

- subroutine, public [init\\_genrand](#) (s)
- subroutine, public [init\\_by\\_array](#) (init\_key)
- integer(kind=[wi](#)) function, public [genrand\\_int32](#) ()
- integer(kind=[wi](#)) function, public [genrand\\_int31](#) ()

- `real(kind=wr)` function, public `genrand_real1` ()
- `real(kind=wr)` function, public `genrand_real2` ()
- `real(kind=wr)` function, public `genrand_real3` ()
- `real(kind=wr)` function, public `genrand_res53` ()

### Public Attributes

- integer, parameter, public `wi` = `intg`
- integer, parameter, public `wl` = `long`
- integer, parameter, public `wr` = `dobl`
- `integer(kind=wi)`, `dimension(n)`, public `mt`
- `logical(kind=wi)`, public `mtinit` = `.false._wi`
- `integer(kind=wi)`, public `mti` = `n + 1_wi`

### Private Member Functions

- elemental function `uiadd` (a, b)
- elemental function `uisub` (a, b)
- elemental function `uimlt` (a, b)

### Private Attributes

- integer, parameter `intg` = `selected_int_kind( 9 )`
- integer, parameter `long` = `selected_int_kind( 18 )`
- integer, parameter `flot` = `selected_real_kind( 6, 37 )`
- integer, parameter `dobl` = `selected_real_kind( 15, 307 )`
- `integer(kind=wi)`, parameter `n` = `624_wi`
- `integer(kind=wi)`, parameter `m` = `397_wi`
- `integer(kind=wi)`, parameter `hbs` = `bit_size( n ) / 2_wi`
- `integer(kind=wi)`, parameter `qbs` = `hbs / 2_wi`
- `integer(kind=wi)`, parameter `tbs` = `3_wi * qbs`

#### 5.30.1 Member Function/Subroutine Documentation

5.30.1.1 `integer( kind = wi )` function, public `messy_main_rnd_mtw::genrand_int31` ( )

5.30.1.2 `integer( kind = wi )` function, public `messy_main_rnd_mtw::genrand_int32` ( )

5.30.1.3 `real( kind = wr )` function, public `messy_main_rnd_mtw::genrand_real1` ( )

5.30.1.4 `real( kind = wr )` function, public `messy_main_rnd_mtw::genrand_real2` ( )

5.30.1.5 `real( kind = wr )` function, public `messy_main_rnd_mtw::genrand_real3` ( )

- 5.30.1.6 `real( kind = wr )` function, public `messy_main_rnd_mtw::genrand_res53 ( )`
- 5.30.1.7 subroutine, public `messy_main_rnd_mtw::init_by_array ( integer( kind = wi ), dimension(:), intent(in) init_key )`
- 5.30.1.8 subroutine, public `messy_main_rnd_mtw::init_genrand ( integer( kind = wi ), intent(in) s )`
- 5.30.1.9 elemental function `messy_main_rnd_mtw::uiadd ( integer( kind = wi ), intent(in) a, integer( kind = wi ), intent(in) b )` [private]
- 5.30.1.10 elemental function `messy_main_rnd_mtw::uimlt ( integer( kind = wi ), intent(in) a, integer( kind = wi ), intent(in) b )` [private]
- 5.30.1.11 elemental function `messy_main_rnd_mtw::uisub ( integer( kind = wi ), intent(in) a, integer( kind = wi ), intent(in) b )` [private]

## 5.30.2 Member Data Documentation

- 5.30.2.1 integer, parameter `messy_main_rnd_mtw::dobl = selected_real_kind( 15, 307 )` [private]
- 5.30.2.2 integer, parameter `messy_main_rnd_mtw::flot = selected_real_kind( 6, 37 )` [private]
- 5.30.2.3 integer( kind = wi ), parameter `messy_main_rnd_mtw::hbs = bit_size( n ) / 2_wi` [private]
- 5.30.2.4 integer, parameter `messy_main_rnd_mtw::intg = selected_int_kind( 9 )` [private]
- 5.30.2.5 integer, parameter `messy_main_rnd_mtw::long = selected_int_kind( 18 )` [private]
- 5.30.2.6 integer( kind = wi ), parameter `messy_main_rnd_mtw::m = 397_wi` [private]
- 5.30.2.7 integer( kind = wi ), dimension(n), public `messy_main_rnd_mtw::mt`
- 5.30.2.8 integer( kind = wi ), public `messy_main_rnd_mtw::mti = n + 1_wi`
- 5.30.2.9 logical( kind = wi ), public `messy_main_rnd_mtw::mtinit = .false._wi`
- 5.30.2.10 integer( kind = wi ), parameter `messy_main_rnd_mtw::n = 624_wi` [private]
- 5.30.2.11 integer( kind = wi ), parameter `messy_main_rnd_mtw::qbs = hbs / 2_wi` [private]

5.30.2.12 integer( kind = wi ), parameter messy\_main\_rnd\_mtw::tbs = 3\_wi \* qbs  
[private]

5.30.2.13 integer, parameter, public messy\_main\_rnd\_mtw::wi = intg

5.30.2.14 integer, parameter, public messy\_main\_rnd\_mtw::wl = long

5.30.2.15 integer, parameter, public messy\_main\_rnd\_mtw::wr = dobl

The documentation for this module was generated from the following file:

- [/home/sander/e2/messy\\_d2.50s\\_rs/messy/mbm/caaba/messy\\_main\\_rnd\\_mtw.-f90](#)

## 5.31 messy\_main\_rnd\_mtw\_ja Module Reference

### Data Types

- interface [add](#)
- interface [add\\_assign](#)
- interface [assign](#)
- interface [delete](#)
- interface [div](#)
- interface [div\\_by\\_x](#)
- interface [divrem](#)
- type [gf2x\\_obj](#)
- type [gf2x\\_prime\\_obj](#)
- interface [mod\\_by\\_x](#)
- interface [mult](#)
- interface [mult\\_assign](#)
- interface [mult\\_by\\_x](#)
- interface [new](#)
- interface [pow](#)
- interface [print\\_bit](#)
- interface [print\\_hex](#)
- interface [rem](#)
- interface [set\\_coef](#)
- interface [set\\_prime](#)
- interface [shift](#)
- interface [square](#)

### Public Member Functions

- subroutine, public [mt\\_jump\\_ahead](#) (v, w, jp, id, getp, putp)

## Public Attributes

- integer([INT32](#)), parameter, public [nn](#) = 624

## Private Member Functions

- integer([INT32](#)) function [get\\_size](#) (deg)
- subroutine [gf2x\\_new](#) (this, deg)
- subroutine [gf2x\\_delete](#) (this)
- subroutine [gf2x\\_print\\_bit](#) (this)
- subroutine [gf2x\\_print\\_hex](#) (this)
- subroutine [gf2x\\_assign](#) (c, a)
- logical function [is\\_zero](#) (a)
- integer([INT32](#)) function [get\\_deg](#) (a)
- subroutine [gf2x\\_set\\_coef](#) (a, i)
- subroutine [gf2x\\_add\\_assign](#) (c, a)
- subroutine [gf2x\\_add](#) (c, a, b)
- subroutine [gf2x\\_pow](#) (c, a, e)
- subroutine [gf2x\\_square](#) (c, a)
- recursive subroutine [gf2x\\_mult\\_kara](#) (c, a, b)
- subroutine [gf2x\\_mult\\_assign\\_kara](#) (a, b)
- subroutine [gf2x\\_mult\\_assign\\_normal](#) (a, b)
- subroutine [gf2x\\_mult\\_normal](#) (c, a, b)
- subroutine [gf2x\\_shift](#) (c, a, i)
- subroutine [gf2x\\_divrem](#) (q, r, a, b)
- subroutine [gf2x\\_div](#) (q, a, b)
- subroutine [gf2x\\_rem](#) (r, a, b)
- subroutine [gf2x\\_set\\_prime](#) (mp, m)
- subroutine [gf2x\\_delete\\_prime](#) (mp)
- subroutine [gf2x\\_rem\\_barrett](#) (r, a, m)
- subroutine [gf2x\\_mod\\_by\\_x](#) (c, a, i)
- subroutine [gf2x\\_mult\\_by\\_x](#) (c, a, i)
- subroutine [gf2x\\_div\\_by\\_x](#) (c, a, i)
- subroutine [gf2x\\_pow\\_pow\\_2](#) (c, e, m)
- subroutine [gf2x\\_pow\\_mod](#) (c, a, e, m)
- integer([INT32](#)) function [deg\\_i32](#) (a)
- integer([INT32](#)) function [deg\\_i64](#) (a)
- subroutine [square\\_i32](#) (a, ch, cl)
- subroutine [mult\\_i32](#) (a, b, ch, cl)
- subroutine [mult\\_i32\\_old](#) (a, b, ch, cl)
- subroutine [shift\\_i32](#) (a, i, ch, cm, cl)
- subroutine [f\\_get\\_coeff](#) ([nn](#), [mm](#), [rr](#), [ww](#), [avec](#), nj, id, pp, np)
- subroutine [mt\\_matvec](#) (v, w)

### Private Attributes

- integer, parameter `INT32` = selected\_int\_kind(9)
- integer, parameter `INT64` = selected\_int\_kind(18)
- integer, parameter `REAL64` = selected\_real\_kind(15)
- integer(`INT32`), parameter `mm` = 397
- integer(`INT32`), parameter `rr` = 31
- integer(`INT32`), parameter `ww` = 32
- integer(`INT32`), parameter `avec` = Z'9908b0df'
- integer(`INT32`), parameter `MT19937_N` = 624
- integer(`INT32`), parameter `MT19937_M` = 397
- integer(`INT32`), parameter `MT19937_W` = 32
- integer(`INT32`), parameter `MT19937_R` = 31
- integer(`INT32`), parameter `MT19937_MATA` = Z'9908b0df'
- integer(`INT32`), parameter `MT19937_WMASK` = Z'ffffff'
- integer(`INT32`), parameter `MT19937_UMASK` = Z'80000000'
- integer(`INT32`), parameter `MT19937_LMASK` = Z'7ffffff'
- integer(`INT32`), parameter `MT19937_SHFT0` = 11
- integer(`INT32`), parameter `MT19937_SHFT1` = 18
- integer(`INT32`), parameter `MT19937_SHFTB` = 7
- integer(`INT32`), parameter `MT19937_SHFTC` = 15
- integer(`INT32`), parameter `MT19937_MASKB` = Z'9d2c5680'
- integer(`INT32`), parameter `MT19937_MASKC` = Z'efc60000'
- integer(`INT32`), parameter `MT19937_MAG` = (/ 0 , `MT19937_MATA` /)
- integer(`INT32`), parameter `MAX_KARA` = 64

### 5.31.1 Member Function/Subroutine Documentation

5.31.1.1 integer(`INT32`) function messy\_main\_rnd\_mtw\_ja::deg\_i32 ( integer(`INT32`) *a* ) [private]

5.31.1.2 integer(`INT32`) function messy\_main\_rnd\_mtw\_ja::deg\_i64 ( integer(`INT64`) *a* ) [private]

5.31.1.3 subroutine messy\_main\_rnd\_mtw\_ja::f\_get\_coeff ( integer(`INT32`), intent(in) *nn*, integer(`INT32`), intent(in) *mm*, integer(`INT32`), intent(in) *rr*, integer(`INT32`), intent(in) *ww*, integer(`INT32`), intent(in) *avec*, integer(`INT32`), intent(in) *nj*, integer(`INT32`), intent(in) *id*, integer(`INT32`), dimension(0:nn-1), intent(inout) *pp*, integer(`INT32`), intent(inout) *np* ) [private]

5.31.1.4 integer(`INT32`) function messy\_main\_rnd\_mtw\_ja::get\_deg ( type(gf2x\_obj), intent(in) *a* ) [private]

5.31.1.5 integer(`INT32`) function messy\_main\_rnd\_mtw\_ja::get\_size ( integer(`INT32`) *deg* ) [private]

- 5.31.1.6 subroutine messy\_main\_rnd\_mtw\_ja::gf2x\_add ( type(gf2x\_obj), intent(inout) c, type(gf2x\_obj), intent(in) a, type(gf2x\_obj), intent(in) b ) [private]
- 5.31.1.7 subroutine messy\_main\_rnd\_mtw\_ja::gf2x\_add\_assign ( type(gf2x\_obj), intent(inout) c, type(gf2x\_obj), intent(in) a ) [private]
- 5.31.1.8 subroutine messy\_main\_rnd\_mtw\_ja::gf2x\_assign ( type(gf2x\_obj), intent(inout) c, type(gf2x\_obj), intent(in) a ) [private]
- 5.31.1.9 subroutine messy\_main\_rnd\_mtw\_ja::gf2x\_delete ( type(gf2x\_obj), intent(inout) this ) [private]
- 5.31.1.10 subroutine messy\_main\_rnd\_mtw\_ja::gf2x\_delete\_prime ( type(gf2x\_prime\_obj), intent(inout) mp ) [private]
- 5.31.1.11 subroutine messy\_main\_rnd\_mtw\_ja::gf2x\_div ( type(gf2x\_obj), intent(inout) q, type(gf2x\_obj), intent(in) a, type(gf2x\_obj), intent(in) b ) [private]
- 5.31.1.12 subroutine messy\_main\_rnd\_mtw\_ja::gf2x\_div\_by\_x ( type(gf2x\_obj), intent(inout) c, type(gf2x\_obj), intent(in) a, integer(INT32), intent(in) i ) [private]
- 5.31.1.13 subroutine messy\_main\_rnd\_mtw\_ja::gf2x\_divrem ( type(gf2x\_obj), intent(inout) q, type(gf2x\_obj), intent(inout) r, type(gf2x\_obj), intent(in) a, type(gf2x\_obj), intent(in) b ) [private]
- 5.31.1.14 subroutine messy\_main\_rnd\_mtw\_ja::gf2x\_mod\_by\_x ( type(gf2x\_obj), intent(inout) c, type(gf2x\_obj), intent(in) a, integer(INT32), intent(in) i ) [private]
- 5.31.1.15 subroutine messy\_main\_rnd\_mtw\_ja::gf2x\_mult\_assign\_kara ( type(gf2x\_obj), intent(inout) a, type(gf2x\_obj), intent(in) b ) [private]
- 5.31.1.16 subroutine messy\_main\_rnd\_mtw\_ja::gf2x\_mult\_assign\_normal ( type(gf2x\_obj), intent(inout) a, type(gf2x\_obj), intent(in) b ) [private]
- 5.31.1.17 subroutine messy\_main\_rnd\_mtw\_ja::gf2x\_mult\_by\_x ( type(gf2x\_obj), intent(inout) c, type(gf2x\_obj), intent(in) a, integer(INT32), intent(in) i ) [private]
- 5.31.1.18 recursive subroutine messy\_main\_rnd\_mtw\_ja::gf2x\_mult\_kara ( type(gf2x\_obj), intent(inout) c, type(gf2x\_obj), intent(in) a, type(gf2x\_obj), intent(in) b ) [private]
- 5.31.1.19 subroutine messy\_main\_rnd\_mtw\_ja::gf2x\_mult\_normal ( type(gf2x\_obj), intent(inout) c, type(gf2x\_obj), intent(in) a, type(gf2x\_obj), intent(in) b ) [private]



- 5.31.1.20 subroutine messy\_main\_rnd\_mtw\_ja::gf2x\_new ( type(gf2x\_obj),  
intent(inout) *this*, integer(INT32), intent(in) *deg* ) [private]
- 5.31.1.21 subroutine messy\_main\_rnd\_mtw\_ja::gf2x\_pow ( type(gf2x\_obj),  
intent(inout) *c*, type(gf2x\_obj), intent(in) *a*, integer(INT32), intent(in) *e* )  
[private]
- 5.31.1.22 subroutine messy\_main\_rnd\_mtw\_ja::gf2x\_pow\_mod ( type(gf2x\_obj),  
intent(inout) *c*, type(gf2x\_obj), intent(in) *a*, integer(INT32), intent(in) *e*,  
type(gf2x\_prime\_obj), intent(in) *m* ) [private]
- 5.31.1.23 subroutine messy\_main\_rnd\_mtw\_ja::gf2x\_pow\_pow\_2 ( type(gf2x\_obj),  
intent(inout) *c*, integer(INT32), intent(in) *e*, type(gf2x\_prime\_obj), intent(in) *m* )  
[private]
- 5.31.1.24 subroutine messy\_main\_rnd\_mtw\_ja::gf2x\_print\_bit ( type(gf2x\_obj),  
intent(in) *this* ) [private]
- 5.31.1.25 subroutine messy\_main\_rnd\_mtw\_ja::gf2x\_print\_hex ( type(gf2x\_obj),  
intent(in) *this* ) [private]
- 5.31.1.26 subroutine messy\_main\_rnd\_mtw\_ja::gf2x\_rem ( type(gf2x\_obj),  
intent(inout) *r*, type(gf2x\_obj), intent(in) *a*, type(gf2x\_obj), intent(in) *b* )  
[private]
- 5.31.1.27 subroutine messy\_main\_rnd\_mtw\_ja::gf2x\_rem\_barrett ( type(gf2x\_obj),  
intent(inout) *r*, type(gf2x\_obj), intent(in) *a*, type(gf2x\_prime\_obj), intent(in) *m* )  
[private]
- 5.31.1.28 subroutine messy\_main\_rnd\_mtw\_ja::gf2x\_set\_coef ( type(gf2x\_obj),  
intent(inout) *a*, integer(INT32), intent(in) *i* ) [private]
- 5.31.1.29 subroutine messy\_main\_rnd\_mtw\_ja::gf2x\_set\_prime ( type(gf2x\_prime\_obj), intent(inout) *mp*, type(gf2x\_obj), intent(in) *m* )  
[private]
- 5.31.1.30 subroutine messy\_main\_rnd\_mtw\_ja::gf2x\_shift ( type(gf2x\_obj),  
intent(inout) *c*, type(gf2x\_obj), intent(in) *a*, integer(INT32), intent(in) *i* )  
[private]
- 5.31.1.31 subroutine messy\_main\_rnd\_mtw\_ja::gf2x\_square ( type(gf2x\_obj),  
intent(inout) *c*, type(gf2x\_obj), intent(in) *a* ) [private]
- 5.31.1.32 logical function messy\_main\_rnd\_mtw\_ja::is\_zero ( type(gf2x\_obj), intent(in)  
*a* ) [private]

- 5.31.1.33 subroutine, public messy\_main\_rnd\_mtw\_ja::mt\_jump\_ahead ( integer(INT32), dimension(0:nn-1), intent(in) *v*, integer(INT32), dimension(0:nn-1), intent(out) *w*, integer(INT32), intent(in) *jp*, integer(INT32), intent(in) *id*, integer, dimension(0:nn), intent(out), optional *getp*, integer, dimension(0:nn), intent(in), optional *putp* )
- 5.31.1.34 subroutine messy\_main\_rnd\_mtw\_ja::mt\_matvec ( integer(INT32), dimension(0:nn-1), intent(in) *v*, integer(INT32), dimension(0:nn-1), intent(out) *w* ) [private]
- 5.31.1.35 subroutine messy\_main\_rnd\_mtw\_ja::mult\_i32 ( integer(INT32), intent(in) *a*, integer(INT32), intent(in) *b*, integer(INT32), intent(out) *ch*, integer(INT32), intent(out) *cl* ) [private]
- 5.31.1.36 subroutine messy\_main\_rnd\_mtw\_ja::mult\_i32\_old ( integer(INT32), intent(in) *a*, integer(INT32), intent(in) *b*, integer(INT32), intent(out) *ch*, integer(INT32), intent(out) *cl* ) [private]
- 5.31.1.37 subroutine messy\_main\_rnd\_mtw\_ja::shift\_i32 ( integer(INT32), intent(in) *a*, integer(INT32), intent(in) *i*, integer(INT32), intent(out) *ch*, integer(INT32), intent(out) *cm*, integer(INT32), intent(out) *cl* ) [private]
- 5.31.1.38 subroutine messy\_main\_rnd\_mtw\_ja::square\_i32 ( integer(INT32), intent(in) *a*, integer(INT32), intent(out) *ch*, integer(INT32), intent(out) *cl* ) [private]

## 5.31.2 Member Data Documentation

- 5.31.2.1 integer(INT32), parameter messy\_main\_rnd\_mtw\_ja::avec = Z'9908b0df' [private]
- 5.31.2.2 integer, parameter messy\_main\_rnd\_mtw\_ja::INT32 = selected\_int\_kind(9) [private]
- 5.31.2.3 integer, parameter messy\_main\_rnd\_mtw\_ja::INT64 = selected\_int\_kind(18) [private]
- 5.31.2.4 integer(INT32), parameter messy\_main\_rnd\_mtw\_ja::MAX\_KARA = 64 [private]
- 5.31.2.5 integer(INT32), parameter messy\_main\_rnd\_mtw\_ja::mm = 397 [private]
- 5.31.2.6 integer(INT32), parameter messy\_main\_rnd\_mtw\_ja::MT19937\_LMASK = Z'7ffffff' [private]
- 5.31.2.7 integer(INT32), parameter messy\_main\_rnd\_mtw\_ja::MT19937\_M = 397 [private]

- 5.31.2.8 integer(INT32), parameter messy\_main\_rnd\_mtw\_ja::MT19937\_MAG = (/ 0 ,  
MT19937\_MATA /) [private]
- 5.31.2.9 integer(INT32), parameter messy\_main\_rnd\_mtw\_ja::MT19937\_MASKB =  
Z'9d2c5680' [private]
- 5.31.2.10 integer(INT32), parameter messy\_main\_rnd\_mtw\_ja::MT19937\_MASKC =  
Z'efc60000' [private]
- 5.31.2.11 integer(INT32), parameter messy\_main\_rnd\_mtw\_ja::MT19937\_MATA =  
Z'9908b0df' [private]
- 5.31.2.12 integer(INT32), parameter messy\_main\_rnd\_mtw\_ja::MT19937\_N = 624  
[private]
- 5.31.2.13 integer(INT32), parameter messy\_main\_rnd\_mtw\_ja::MT19937\_R = 31  
[private]
- 5.31.2.14 integer(INT32), parameter messy\_main\_rnd\_mtw\_ja::MT19937\_SHFT0 = 11  
[private]
- 5.31.2.15 integer(INT32), parameter messy\_main\_rnd\_mtw\_ja::MT19937\_SHFT1 = 18  
[private]
- 5.31.2.16 integer(INT32), parameter messy\_main\_rnd\_mtw\_ja::MT19937\_SHFTB = 7  
[private]
- 5.31.2.17 integer(INT32), parameter messy\_main\_rnd\_mtw\_ja::MT19937\_SHFTC = 15  
[private]
- 5.31.2.18 integer(INT32), parameter messy\_main\_rnd\_mtw\_ja::MT19937\_UMASK =  
Z'80000000' [private]
- 5.31.2.19 integer(INT32), parameter messy\_main\_rnd\_mtw\_ja::MT19937\_W = 32  
[private]
- 5.31.2.20 integer(INT32), parameter messy\_main\_rnd\_mtw\_ja::MT19937\_WMASK =  
Z'ffffff' [private]
- 5.31.2.21 integer(INT32), parameter, public messy\_main\_rnd\_mtw\_ja::nn = 624
- 5.31.2.22 integer, parameter messy\_main\_rnd\_mtw\_ja::REAL64 = selected\_real\_kind(15)  
[private]
- 5.31.2.23 integer(INT32), parameter messy\_main\_rnd\_mtw\_ja::rr = 31 [private]

### 5.31.2.24 integer(INT32), parameter messy\_main\_rnd\_mtw\_ja::ww = 32 [private]

The documentation for this module was generated from the following file:

- [/home/sander/e2/messy\\_d2.50s\\_rs/messy/mbm/caaba/messy\\_main\\_rnd\\_mtw\\_ja.f90](#)

## 5.32 messy\_main\_timer Module Reference

Collaboration diagram for messy\_main\_timer:

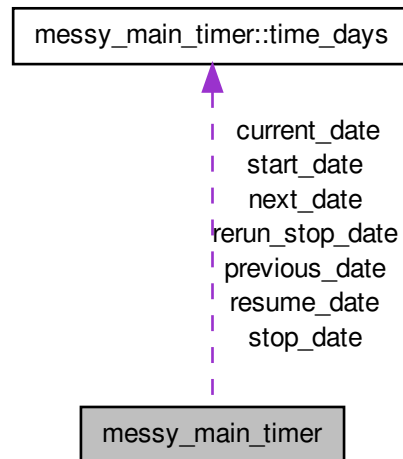

### Data Types

- type [time\\_days](#)
- interface [timer\\_get\\_date](#)
- interface [timer\\_set\\_date](#)

### Public Member Functions

- subroutine, public [date\\_set](#) (day, second, time)
- subroutine, public [date\\_get](#) (time, day, second, ierr)
- subroutine, public [add\\_date](#) (days, seconds, my\_day, ierr)
- subroutine, public [copy\\_date](#) (date1, date2, ierr)

- subroutine, public [print\\_date](#) (day, ierr, mess)
- subroutine, public [print\\_date\\_components](#) (day, ierr, mess)
- subroutine, public [if\\_less](#) (date1, date2, lless, ierr)
- subroutine, public [if\\_equal](#) (date1, date2, leq, ierr)
- subroutine, public [is\\_init](#) (date, linit)
- INTEGER function, public [MonthLength](#) (ky, km)
- INTEGER function, public [JulianMonthLength](#) (ky, km)
- INTEGER function, public [YearLength](#) (yr)
- INTEGER function, public [JulianYearLength](#) (yr)
- REAL(dp) function, public [YearDay](#) (date)
- REAL(DP) function, public [julian\\_day](#) (DD, MM, YY)
- subroutine, public [time\\_span\\_s](#) (dts, yy1, mo1, dy1, hr1, mi1, se1, yy2, mo2, dy2, hr2, mi2, se2)
- subroutine, public [time\\_span\\_d](#) (dtd, yy1, mo1, dy1, hr1, mi1, se1, yy2, mo2, dy2, hr2, mi2, se2)
- REAL(DP) function, public [gregor2julian](#) (YY, MM, DD, hr, mi, se)
- subroutine, public [julian2gregor](#) (jdate, year, month, day, hrs, mins, secs)
- REAL(dp) function, public [utc2lt](#) (status, model\_time, degree\_lon)
- subroutine [timer\\_set\\_date\\_str](#) (status, strflag, yr, mo, dy, hr, mi, se)
- subroutine, public [timer\\_set\\_calendar](#) (status, strcal)
- subroutine, public [timer\\_get\\_calendar](#) (status, ical)
- subroutine, public [timer\\_set\\_delta\\_time](#) (status, dt)
- subroutine, public [timer\\_get\\_delta\\_time](#) (status, dt)
- subroutine, public [timer\\_add\\_date](#) (status, add\_seconds, iyr, imo, idy, ihr, imi, ise, oyr, omo, ody, ohr, omi, ose)
- subroutine, public [timer\\_set\\_lresume](#)
- subroutine, public [timer\\_get\\_lresume](#) (lr)
- subroutine, public [timer\\_set\\_time\\_step\\_len](#) (l2tts)
- subroutine, public [timer\\_set\\_no\\_cycles](#) (ncyc)
- subroutine, public [timer\\_get\\_no\\_cycles](#) (ncyc)
- subroutine, public [timer\\_set\\_labort](#) (la)
- subroutine, public [timer\\_get\\_labort](#) (la)
- subroutine, public [eval\\_time\\_str](#) (status, z\_time\_string, z\_tuf, z\_year, z\_month, z\_day, z\_hour, z\_min, z\_sec)

### Public Attributes

- CHARACTER(LEN=\*), parameter, public [modstr](#) = 'timer'
- CHARACTER(LEN=\*), parameter, public [modver](#) = '0.1'
- INTEGER, parameter, public [CAL\\_JULIAN](#) = 0
- INTEGER, parameter, public [CAL\\_360D](#) = 1
- INTEGER, public [CAL\\_TYPE](#) = 0
- CHARACTER(LEN=8), parameter, public [CALENDER](#) = (/ 'standard', '360\_day' /)
- CHARACTER(len=3), parameter, public [CMONTHS](#) = (/ 'Jan','Feb','Mar','Apr','May','Jun','Jul','Aug','Sep','Oct','Nov','Dec' /)

- LOGICAL, public [LDEBUG2](#) = .FALSE.
- LOGICAL, public [LDEBUG](#) = .FALSE.
- INTEGER, public [INIT\\_STEP](#) = 0
- REAL(dp), public [delta\\_time](#) = -999.\_dp
- REAL(dp), public [time\\_step\\_len](#) = 0.\_dp
- LOGICAL, public [lstart](#) = .TRUE.
- LOGICAL, public [lfirst\\_cycle](#) = .TRUE.
- LOGICAL, public [lresume](#) = .FALSE.
- LOGICAL, public [lbreak](#) = .FALSE.
- LOGICAL, public [lstop](#) = .FALSE.
- LOGICAL, public [l\\_rerun](#) = .FALSE.
- LOGICAL, public [L\\_TRIGGER\\_RESTART](#) = .FALSE.
- LOGICAL, public [lcycbreak](#) = .FALSE.
- LOGICAL, public [lforcedtime](#) = .FALSE.
- INTEGER, public [NO\\_CYCLES](#) = 9999
- INTEGER, public [NO\\_DAYS](#) = -9999
- INTEGER, public [NO\\_STEPS](#) = -9999
- LOGICAL, public [LABORT](#) = .FALSE.
- INTEGER, public [YEAR](#)
- INTEGER, public [MONTH](#)
- INTEGER, public [DAY](#)
- INTEGER, public [HOUR](#)
- INTEGER, public [MINUTE](#)
- INTEGER, public [SECOND](#)
- INTEGER, public [YEAR\\_START](#)
- INTEGER, public [MONTH\\_START](#)
- INTEGER, public [DAY\\_START](#)
- INTEGER, public [HOUR\\_START](#)
- INTEGER, public [MINUTE\\_START](#)
- INTEGER, public [SECOND\\_START](#)
- INTEGER, public [YEAR\\_NEXT](#)
- INTEGER, public [MONTH\\_NEXT](#)
- INTEGER, public [DAY\\_NEXT](#)
- INTEGER, public [HOUR\\_NEXT](#)
- INTEGER, public [MINUTE\\_NEXT](#)
- INTEGER, public [SECOND\\_NEXT](#)
- INTEGER, public [current\\_time\\_step](#)
- REAL(dp), public [JULIAN\\_DATE\\_START](#)
- INTEGER, public [DAYOFYEAR](#)
- TYPE([time\\_days](#)), public [start\\_date](#)
- TYPE([time\\_days](#)), public [stop\\_date](#)
- TYPE([time\\_days](#)), public [resume\\_date](#)
- TYPE([time\\_days](#)), public [previous\\_date](#)
- TYPE([time\\_days](#)), public [current\\_date](#)
- TYPE([time\\_days](#)), public [next\\_date](#)
- TYPE([time\\_days](#)), public [rerun\\_stop\\_date](#)

## Private Member Functions

- subroutine [date\\_set\\_components](#) (nyr, nmo, ndy, nhr, nmin, nsec, i\_time)
- subroutine [date\\_get\\_components](#) (time, year, month, day, hour, minute, second, ierror)
- subroutine [timer\\_set\\_date\\_myd](#) (status, my\_date, yr, mo, dy, hr, mi, se)
- subroutine [timer\\_set\\_date\\_str\\_ds](#) (status, strflag, day, second)
- subroutine [timer\\_set\\_date\\_myd\\_ds](#) (status, my\_date, day, second)
- subroutine [timer\\_get\\_date\\_str](#) (status, strflag, yr, mo, dy, hr, mi, se)
- subroutine [timer\\_get\\_date\\_myd](#) (status, my\_date, yr, mo, dy, hr, mi, se)

### 5.32.1 Member Function/Subroutine Documentation

- 5.32.1.1 subroutine, public messy\_main\_timer::add\_date ( INTEGER, intent(in) *days*, INTEGER, intent(in) *seconds*, TYPE (time\_days), intent(inout) *my\_date*, INTEGER, intent(out), optional *ierr* )
- 5.32.1.2 subroutine, public messy\_main\_timer::copy\_date ( TYPE(time\_days), intent(in) *date1*, TYPE(time\_days), intent(out) *date2*, INTEGER, intent(out), optional *ierr* )
- 5.32.1.3 subroutine, public messy\_main\_timer::date\_get ( TYPE(time\_days), intent(in) *time*, INTEGER, intent(out), optional *day*, INTEGER, intent(out), optional *second*, INTEGER, intent(out), optional *ierr* )
- 5.32.1.4 subroutine messy\_main\_timer::date\_get\_components ( TYPE (time\_days), intent(in) *time*, INTEGER, intent(out) *year*, INTEGER, intent(out) *month*, INTEGER, intent(out) *day*, INTEGER, intent(out) *hour*, INTEGER, intent(out), optional *minute*, INTEGER, intent(out), optional *second*, INTEGER, intent(out), optional *ierror* )  
[private]
- 5.32.1.5 subroutine, public messy\_main\_timer::date\_set ( INTEGER, intent(in) *day*, INTEGER, intent(in) *second*, TYPE(time\_days), intent(out) *time* )
- 5.32.1.6 subroutine messy\_main\_timer::date\_set\_components ( INTEGER, intent(in) *nyr*, INTEGER, intent(in) *nmo*, INTEGER, intent(in) *ndy*, INTEGER, intent(in) *nhr*, INTEGER, intent(in) *nmin*, INTEGER, intent(in) *nsec*, TYPE(time\_days), intent(out) *i\_time* ) [private]
- 5.32.1.7 subroutine, public messy\_main\_timer::eval\_time\_str ( INTEGER, intent(out) *status*, CHARACTER(LEN=\*), intent(inout) *z\_time\_string*, REAL(DP), intent(out) *z\_tuf*, INTEGER, intent(out), optional *z\_year*, INTEGER, intent(out), optional *z\_month*, INTEGER, intent(out), optional *z\_day*, INTEGER, intent(out), optional *z\_hour*, INTEGER, intent(out), optional *z\_min*, INTEGER, intent(out), optional *z\_sec* )
- 5.32.1.8 REAL(DP) function, public messy\_main\_timer::gregor2julian ( INTEGER, intent(in) *YY*, INTEGER, intent(in) *MM*, INTEGER, intent(in) *DD*, INTEGER, intent(in) *hr*, INTEGER, intent(in) *mi*, INTEGER, intent(in) *se* )

- 5.32.1.9 subroutine, public messy\_main\_timer::if\_equal ( TYPE (time\_days), intent(in) *date1*, TYPE (time\_days), intent(in) *date2*, LOGICAL, intent(out) *leq*, INTEGER, intent(out), optional *ierr* )
- 5.32.1.10 subroutine, public messy\_main\_timer::if\_less ( TYPE (time\_days), intent(in) *date1*, TYPE (time\_days), intent(in) *date2*, LOGICAL, intent(out) *lless*, INTEGER, intent(out), optional *ierr* )
- 5.32.1.11 subroutine, public messy\_main\_timer::is\_init ( TYPE (time\_days), intent(in) *date*, LOGICAL, intent(out) *linit* )
- 5.32.1.12 subroutine, public messy\_main\_timer::julian2gregor ( REAL(dp), intent(in) *jdate*, INTEGER, intent(out) *year*, INTEGER, intent(out) *month*, INTEGER, intent(out) *day*, INTEGER, intent(out) *hrs*, INTEGER, intent(out) *mins*, INTEGER, intent(out) *secs* )
- 5.32.1.13 REAL(DP) function, public messy\_main\_timer::julian\_day ( REAL(dp), intent(in) *DD*, INTEGER, intent(in) *MM*, INTEGER, intent(in) *YY* )
- 5.32.1.14 INTEGER function, public messy\_main\_timer::JulianMonthLength ( INTEGER, intent(in) *ky*, INTEGER, intent(in) *km* )
- 5.32.1.15 INTEGER function, public messy\_main\_timer::JulianYearLength ( INTEGER, intent(in) *yr* )
- 5.32.1.16 INTEGER function, public messy\_main\_timer::MonthLength ( INTEGER, intent(in) *ky*, INTEGER, intent(in) *km* )
- 5.32.1.17 subroutine, public messy\_main\_timer::print\_date ( TYPE (time\_days), intent(in) *day*, INTEGER, intent(out) *ierr*, CHARACTER(len=\*), intent(out), optional *mess* )
- 5.32.1.18 subroutine, public messy\_main\_timer::print\_date\_components ( TYPE (time\_days), intent(in) *day*, INTEGER, intent(out) *ierr*, CHARACTER(len=STRLEN\_ULONG), intent(out), optional *mess* )
- 5.32.1.19 subroutine, public messy\_main\_timer::time\_span\_d ( REAL(dp), intent(out) *dtd*, INTEGER, intent(in) *yy1*, INTEGER, intent(in) *mo1*, INTEGER, intent(in) *dy1*, INTEGER, intent(in) *hr1*, INTEGER, intent(in) *mi1*, INTEGER, intent(in) *se1*, INTEGER, intent(in) *yy2*, INTEGER, intent(in) *mo2*, INTEGER, intent(in) *dy2*, INTEGER, intent(in) *hr2*, INTEGER, intent(in) *mi2*, INTEGER, intent(in) *se2* )
- 5.32.1.20 subroutine, public messy\_main\_timer::time\_span\_s ( INTEGER, intent(out) *dts*, INTEGER, intent(in) *yy1*, INTEGER, intent(in) *mo1*, INTEGER, intent(in) *dy1*, INTEGER, intent(in) *hr1*, INTEGER, intent(in) *mi1*, INTEGER, intent(in) *se1*, INTEGER, intent(in) *yy2*, INTEGER, intent(in) *mo2*, INTEGER, intent(in) *dy2*, INTEGER, intent(in) *hr2*, INTEGER, intent(in) *mi2*, INTEGER, intent(in) *se2* )



- 5.32.1.21 subroutine, public messy\_main\_timer::timer\_add\_date ( INTEGER, intent(out) *status*, INTEGER, intent(in) *add\_seconds*, INTEGER, intent(in) *iy*, INTEGER, intent(in) *imo*, INTEGER, intent(in) *idy*, INTEGER, intent(in) *ihr*, INTEGER, intent(in) *imi*, INTEGER, intent(in) *ise*, INTEGER, intent(out) *oyr*, INTEGER, intent(out) *omo*, INTEGER, intent(out) *ody*, INTEGER, intent(out) *ohr*, INTEGER, intent(out) *omi*, INTEGER, intent(out) *ose* )
- 5.32.1.22 subroutine, public messy\_main\_timer::timer\_get\_calendar ( INTEGER, intent(out) *status*, INTEGER, intent(out) *ical* )
- 5.32.1.23 subroutine messy\_main\_timer::timer\_get\_date\_myd ( INTEGER, intent(out) *status*, TYPE(time\_days), intent(in) *my\_date*, INTEGER, intent(out) *yr*, INTEGER, intent(out) *mo*, INTEGER, intent(out) *dy*, INTEGER, intent(out) *hr*, INTEGER, intent(out) *mi*, INTEGER, intent(out) *se* ) [private]
- 5.32.1.24 subroutine messy\_main\_timer::timer\_get\_date\_str ( INTEGER, intent(out) *status*, CHARACTER(LEN=\*), intent(in) *strflag*, INTEGER, intent(out) *yr*, INTEGER, intent(out) *mo*, INTEGER, intent(out) *dy*, INTEGER, intent(out) *hr*, INTEGER, intent(out) *mi*, INTEGER, intent(out) *se* ) [private]
- 5.32.1.25 subroutine, public messy\_main\_timer::timer\_get\_delta\_time ( INTEGER, intent(out) *status*, REAL(dp), intent(out) *dt* )
- 5.32.1.26 subroutine, public messy\_main\_timer::timer\_get\_labort ( LOGICAL, intent(out) *la* )
- 5.32.1.27 subroutine, public messy\_main\_timer::timer\_get\_lresume ( LOGICAL, intent(out) *lr* )
- 5.32.1.28 subroutine, public messy\_main\_timer::timer\_get\_no\_cycles ( INTEGER, intent(out) *ncyc* )
- 5.32.1.29 subroutine, public messy\_main\_timer::timer\_set\_calendar ( INTEGER, intent(out) *status*, CHARACTER(LEN=\*), intent(in) *strcal* )
- 5.32.1.30 subroutine messy\_main\_timer::timer\_set\_date\_myd ( INTEGER, intent(out) *status*, TYPE(time\_days), intent(out) *my\_date*, INTEGER, intent(in) *yr*, INTEGER, intent(in) *mo*, INTEGER, intent(in) *dy*, INTEGER, intent(in) *hr*, INTEGER, intent(in) *mi*, INTEGER, intent(in) *se* ) [private]
- 5.32.1.31 subroutine messy\_main\_timer::timer\_set\_date\_myd\_ds ( INTEGER, intent(out) *status*, TYPE(time\_days), intent(out) *my\_date*, INTEGER, intent(in) *day*, INTEGER, intent(in) *second* ) [private]
- 5.32.1.32 subroutine messy\_main\_timer::timer\_set\_date\_str ( INTEGER, intent(out) *status*, CHARACTER(LEN=\*), intent(in) *strflag*, INTEGER, intent(in) *yr*, INTEGER, intent(in) *mo*, INTEGER, intent(in) *dy*, INTEGER, intent(in) *hr*, INTEGER, intent(in) *mi*, INTEGER, intent(in) *se* )

- 5.32.1.33 subroutine messy\_main\_timer::timer\_set\_date\_str\_ds ( INTEGER, intent(out) *status*, CHARACTER(LEN=\*), intent(in) *strflag*, INTEGER, intent(in) *day*, INTEGER, intent(in) *second* ) [private]
- 5.32.1.34 subroutine, public messy\_main\_timer::timer\_set\_delta\_time ( INTEGER, intent(out) *status*, REAL(dp), intent(in) *dt* )
- 5.32.1.35 subroutine, public messy\_main\_timer::timer\_set\_labort ( LOGICAL, intent(in) *la* )
- 5.32.1.36 subroutine, public messy\_main\_timer::timer\_set\_lresume ( )
- 5.32.1.37 subroutine, public messy\_main\_timer::timer\_set\_no\_cycles ( INTEGER, intent(in) *ncyc* )
- 5.32.1.38 subroutine, public messy\_main\_timer::timer\_set\_time\_step\_len ( LOGICAL, intent(in) *l2tfs* )
- 5.32.1.39 REAL(dp) function, public messy\_main\_timer::utc2lt ( INTEGER, intent(out) *status*, REAL(dp), intent(in) *model\_time*, REAL(dp), intent(in) *degree\_lon* )
- 5.32.1.40 REAL(dp) function, public messy\_main\_timer::YearDay ( TYPE(time\_days) *date* )
- 5.32.1.41 INTEGER function, public messy\_main\_timer::YearLength ( INTEGER, intent(in), optional *yr* )

## 5.32.2 Member Data Documentation

- 5.32.2.1 INTEGER, parameter, public messy\_main\_timer::CAL\_360D = 1
- 5.32.2.2 INTEGER, parameter, public messy\_main\_timer::CAL\_JULIAN = 0
- 5.32.2.3 INTEGER, public messy\_main\_timer::CAL\_TYPE = 0
- 5.32.2.4 CHARACTER(LEN=8), parameter, public messy\_main\_timer::CALENDER = (/ 'standard', '360\_day' /)
- 5.32.2.5 CHARACTER(len=3), parameter, public messy\_main\_timer::CMONTHS = (/ 'Jan','Feb','Mar','Apr','May','Jun','Jul','Aug','Sep','Oct','Nov','Dec' /)
- 5.32.2.6 TYPE(time\_days), public messy\_main\_timer::current\_date
- 5.32.2.7 INTEGER, public messy\_main\_timer::current\_time\_step
- 5.32.2.8 INTEGER, public messy\_main\_timer::DAY

- 5.32.2.9 INTEGER, public messy\_main\_timer::DAY\_NEXT
- 5.32.2.10 INTEGER, public messy\_main\_timer::DAY\_START
- 5.32.2.11 INTEGER, public messy\_main\_timer::DAYOFTYEAR
- 5.32.2.12 REAL(dp), public messy\_main\_timer::delta\_time = -999.\_dp
- 5.32.2.13 INTEGER, public messy\_main\_timer::HOUR
- 5.32.2.14 INTEGER, public messy\_main\_timer::HOUR\_NEXT
- 5.32.2.15 INTEGER, public messy\_main\_timer::HOUR\_START
- 5.32.2.16 INTEGER, public messy\_main\_timer::INIT\_STEP = 0
- 5.32.2.17 REAL(dp), public messy\_main\_timer::JULIAN\_DATE\_START
- 5.32.2.18 LOGICAL, public messy\_main\_timer::l\_rerun = .FALSE.
- 5.32.2.19 LOGICAL, public messy\_main\_timer::L\_TRIGGER\_RESTART = .FALSE.
- 5.32.2.20 LOGICAL, public messy\_main\_timer::LABORT = .FALSE.
- 5.32.2.21 LOGICAL, public messy\_main\_timer::lbreak = .FALSE.
- 5.32.2.22 LOGICAL, public messy\_main\_timer::lcycbreak = .FALSE.
- 5.32.2.23 LOGICAL, public messy\_main\_timer::LDEBUG = .FALSE.
- 5.32.2.24 LOGICAL, public messy\_main\_timer::LDEBUG2 = .FALSE.
- 5.32.2.25 LOGICAL, public messy\_main\_timer::lfirst\_cycle = .TRUE.
- 5.32.2.26 LOGICAL, public messy\_main\_timer::lforcedtime = .FALSE.
- 5.32.2.27 LOGICAL, public messy\_main\_timer::lresume = .FALSE.
- 5.32.2.28 LOGICAL, public messy\_main\_timer::lstart = .TRUE.
- 5.32.2.29 LOGICAL, public messy\_main\_timer::lstop = .FALSE.
- 5.32.2.30 INTEGER, public messy\_main\_timer::MINUTE
- 5.32.2.31 INTEGER, public messy\_main\_timer::MINUTE\_NEXT
- 5.32.2.32 INTEGER, public messy\_main\_timer::MINUTE\_START

- 5.32.2.33 CHARACTER(LEN=\*), parameter, public messy\_main\_timer::modstr = 'timer'
- 5.32.2.34 CHARACTER(LEN=\*), parameter, public messy\_main\_timer::modver = '0.1'
- 5.32.2.35 INTEGER, public messy\_main\_timer::MONTH
- 5.32.2.36 INTEGER, public messy\_main\_timer::MONTH\_NEXT
- 5.32.2.37 INTEGER, public messy\_main\_timer::MONTH\_START
- 5.32.2.38 TYPE(time\_days), public messy\_main\_timer::next\_date
- 5.32.2.39 INTEGER, public messy\_main\_timer::NO\_CYCLES = 9999
- 5.32.2.40 INTEGER, public messy\_main\_timer::NO\_DAYS = -9999
- 5.32.2.41 INTEGER, public messy\_main\_timer::NO\_STEPS = -9999
- 5.32.2.42 TYPE(time\_days), public messy\_main\_timer::previous\_date
- 5.32.2.43 TYPE(time\_days), public messy\_main\_timer::rerun\_stop\_date
- 5.32.2.44 TYPE(time\_days), public messy\_main\_timer::resume\_date
- 5.32.2.45 INTEGER, public messy\_main\_timer::SECOND
- 5.32.2.46 INTEGER, public messy\_main\_timer::SECOND\_NEXT
- 5.32.2.47 INTEGER, public messy\_main\_timer::SECOND\_START
- 5.32.2.48 TYPE(time\_days), public messy\_main\_timer::start\_date
- 5.32.2.49 TYPE(time\_days), public messy\_main\_timer::stop\_date
- 5.32.2.50 REAL(dp), public messy\_main\_timer::time\_step\_len = 0.\_dp
- 5.32.2.51 INTEGER, public messy\_main\_timer::YEAR
- 5.32.2.52 INTEGER, public messy\_main\_timer::YEAR\_NEXT
- 5.32.2.53 INTEGER, public messy\_main\_timer::YEAR\_START

The documentation for this module was generated from the following file:

- /home/sander/e2/messy\_d2.50s\_rs/messy/mbm/caaba/[messy\\_main\\_timer.f90](#)

## 5.33 messy\_main\_tools Module Reference

### Data Types

- interface [ind2val](#)
- interface [iso2ind](#)
- type [PTR\\_0D\\_ARRAY](#)
- type [PTR\\_1D\\_ARRAY](#)
- type [PTR\\_1D\\_ARRAY\\_INT](#)
- type [PTR\\_2D\\_ARRAY](#)
- type [PTR\\_3D\\_ARRAY](#)
- type [PTR\\_4D\\_ARRAY](#)
- type [PTR\\_5D\\_ARRAY](#)
- interface [remap\\_bounds](#)
- interface [str](#)
- interface [str2num](#)
- type [t\\_reset\\_par](#)

### Public Member Functions

- subroutine, public [read\\_nml\\_open](#) (lex, substr, iou, nmlstr, modstr)
- subroutine, public [read\\_nml\\_check](#) (fstat, substr, iou, nmlstr, modstr)
- subroutine, public [read\\_nml\\_close](#) (substr, iou, modstr)
- subroutine [iso2ind\\_1d](#) (field, iso, k, f, lrev)
- subroutine, public [int2str](#) (str, ii, cpad, cerr)
- subroutine, public [strcrack](#) (str, ch, el, n)
- subroutine, public [ns\\_index](#) (list, value, idx, idx2, l\_periodic)
- subroutine, public [nn\\_index](#) (list, value, idx, idx2, fac, status)
- subroutine, public [nl\\_index](#) (list, value, idx, status)
- REAL(DP) function, dimension(:), allocatable, public [fliparray](#) (list)
- subroutine, public [init\\_convect\\_tables](#)
- LOGICAL function, public [match\\_wild](#) (pattern, string)
- subroutine, public [str2chob](#) (status, str, n, c, o)
- subroutine, public [bilin\\_weight](#) (vn, v, w)
- REAL(dp) function, public [psat\\_mk](#) (p\_temp, p\_l\_liquid)
- subroutine, public [ucase](#) (string)
- REAL(dp) function, public [spec2relhumwmo](#) (status, z\_spechum, z\_temp, z\_press, z\_l\_psat\_ema)
- REAL(dp) function, public [spec2relhum](#) (status, z\_spechum, z\_temp, z\_press, z\_l\_psat\_ema)
- subroutine, public [spec2relhum\\_q](#) (status, relhum, spechum, temp, press, liq\_only)
- REAL(dp) function, public [rel2spechumwmo](#) (status, z\_relhum, z\_temp, z\_press, z\_l\_psat\_ema)
- REAL(dp) function, public [rel2spechum](#) (status, z\_relhum, z\_temp, z\_press, z\_l\_psat\_ema)

- REAL(dp) function, public [rh2mr](#) (status, p\_relhum, p\_temp, p\_press, p\_l\_psat\_ -  
emac, p\_l\_relhum\_wmo)
- REAL(dp) function, public [relhum2mr](#) (status, z\_relhum, z\_temp, z\_press, z\_l\_ -  
psat\_ emac)
- REAL(dp) function, public [relhumwmo2mr](#) (status, z\_relhum, z\_temp, z\_press, z\_l\_ -  
psat\_ emac)
- REAL(dp) function, public [cair\\_trad](#) (status, z\_relhum, z\_temp, z\_press, z\_l\_psat\_ -  
emac)
- REAL(dp) function, public [cair\\_wmo](#) (status, z\_relhum, z\_temp, z\_press, z\_l\_ -  
psat\_ emac)
- REAL(dp) function, dimension(:), pointer [remap\\_bounds1](#) (lb1, array)
- subroutine, public [full2half](#) (full, half, press, pressi)
- subroutine, public [CalcTimeAngles](#) (utsec, sda, ssa, rlt, csza, sza, daylen\_sec, rlat, phi)
- subroutine, public [Spline1D](#) (X, Y, N, YP1, YPN, Y2, natspline)
- subroutine, public [Splint1D](#) (XA, YA, Y2A, N, X, Y, status)
- INTEGER function, public [find\\_next\\_free\\_unit](#) (istart, istop)
- ELEMENTAL REAL(dp) function, public [mass\\_density](#) (press, temp, sphum)
- ELEMENTAL REAL(dp) function, public [layerthickness](#) (geopot\_u, geopot\_l)
- subroutine [str2num\\_real\\_dp](#) (str, out, err)
- subroutine, public [ERRFUNC](#) (X, ERESULT, JINT)
- subroutine, public [calc\\_hybrid\\_coeff](#) (ke, vcoord, vcflat, irefatm, ivctype, hyam, hyai, hybm, hybi)
- subroutine, public [interpol\\_stag2mid](#) (stag\_field, mid\_field, ie, je, ke, intdim)
- subroutine, public [interpol\\_mid2stag](#) (mid\_field, stag\_field, ie, je, ke, intdim)

### Public Attributes

- INTEGER, parameter, public [jptlucu1](#) = 50000
- INTEGER, parameter, public [jptlucu2](#) = 400000
- REAL(dp), dimension(jptlucu1:jptlucu2), target, save, public [tlucua](#)
- REAL(dp), dimension(jptlucu1:jptlucu2), target, save, public [tlucub](#)
- REAL(dp), dimension(jptlucu1:jptlucu2), target, save, public [tlucuc](#)
- REAL(dp), dimension(jptlucu1:jptlucu2), target, save, public [tlucuaw](#)

### Private Member Functions

- subroutine [iso2ind\\_2d](#) (kproma, field, iso, k, f, lrev)
- subroutine [ind2val\\_1d](#) (val, field, k, f)
- subroutine [ind2val\\_2d](#) (kproma, val, field, k, f)
- CHARACTER(LEN=5) function [str\\_logical](#) (zlogical, fmt)
- CHARACTER(LEN=STRLEN\_LONG) function [str\\_integer](#) (zinteger, fmt)
- CHARACTER(LEN=STRLEN\_LONG) function [str\\_real\\_sp](#) (zreal\_sp, fmt)
- CHARACTER(LEN=STRLEN\_LONG) function [str\\_real\\_dp](#) (zreal\_dp, fmt)
- REAL(dp) function, dimension(:, :), pointer [remap\\_bounds2](#) (lb1, lb2, array)
- REAL(dp) function, dimension(:, :, :), pointer [remap\\_bounds3](#) (lb1, lb2, lb3, array)

- REAL(dp) function, dimension(:, :, :), pointer [remap\\_bounds4](#) (lb1, lb2, lb3, lb4, array)
- subroutine [str2num\\_real\\_sp](#) (str, out, err)
- subroutine [str2num\\_integer](#) (str, out, err)

### 5.33.1 Member Function/Subroutine Documentation

- 5.33.1.1 subroutine, public messy\_main\_tools::bilin\_weight ( REAL(dp), dimension(4, 2), intent(in) *vn*, REAL(dp), dimension(2), intent(in) *v*, REAL(dp), dimension(4), intent(out) *w* )
- 5.33.1.2 REAL(dp) function, public messy\_main\_tools::cair\_trad ( INTEGER, intent(out) *status*, REAL(dp), intent(in) *z\_relhum*, REAL(dp), intent(in) *z\_temp*, REAL(dp), intent(in) *z\_press*, LOGICAL, intent(in), optional *z\_lpsat\_emac* )
- 5.33.1.3 REAL(dp) function, public messy\_main\_tools::cair\_wmo ( INTEGER, intent(out) *status*, REAL(dp), intent(in) *z\_relhum*, REAL(dp), intent(in) *z\_temp*, REAL(dp), intent(in) *z\_press*, LOGICAL, intent(in), optional *z\_lpsat\_emac* )
- 5.33.1.4 subroutine, public messy\_main\_tools::calc\_hybrid\_coeff ( INTEGER, intent(in) *ke*, REAL(dp), dimension(ke+1), intent(in) *vcoord*, REAL(dp), intent(in) *vcflat*, INTEGER, intent(in) *irefatm*, INTEGER, intent(in) *ivctype*, REAL(dp), dimension(ke), intent(out), optional *hyam*, REAL(dp), dimension(ke+1), intent(out), optional *hyai*, REAL(dp), dimension(ke), intent(out), optional *hybm*, REAL(dp), dimension(ke+1), intent(out), optional *hybi* )
- 5.33.1.5 subroutine, public messy\_main\_tools::CalcTimeAngles ( REAL(dp), intent(in) *utsec*, REAL(dp), intent(in) *sda*, REAL(dp), dimension(:), intent(out) *ssa*, REAL(dp), dimension(:), intent(out) *rlt*, REAL(dp), dimension(:, :), intent(out) *csza*, REAL(dp), dimension(:, :), intent(out) *sza*, REAL(dp), intent(in) *daylen\_sec*, REAL(dp), dimension(:), intent(in) *rlat*, REAL(dp), dimension(:), intent(in) *phi* )
- 5.33.1.6 subroutine, public messy\_main\_tools::ERRFUNC ( REAL *X*, REAL *ERESULT*, INTEGER *JINT* )
- 5.33.1.7 INTEGER function, public messy\_main\_tools::find\_next\_free\_unit ( INTEGER *istart*, INTEGER *istop* )
- 5.33.1.8 REAL(DP) function, dimension(:), allocatable, public messy\_main\_tools::fliparray ( REAL(DP), dimension(:), intent(in) *list* )
- 5.33.1.9 subroutine, public messy\_main\_tools::full2half ( REAL(dp), dimension(:, :), intent(in) *full*, REAL(dp), dimension(:, :), intent(out) *half*, REAL(dp), dimension(:, :), intent(in) *press*, REAL(dp), dimension(:, :), intent(in) *pressi* )

- 5.33.1.10 subroutine `messy_main_tools::ind2val_1d` ( `REAL(DP)`, intent(out) *val*, `REAL(DP)`, dimension(:), intent(in) *field*, `INTEGER`, intent(in) *k*, `REAL(DP)`, intent(in), optional *f* ) [`private`]
- 5.33.1.11 subroutine `messy_main_tools::ind2val_2d` ( `INTEGER`, intent(in) *kproma*, `REAL(DP)`, dimension(:), intent(out) *val*, `REAL(DP)`, dimension(:,,:), intent(in) *field*, `INTEGER`, dimension(:), intent(in) *k*, `REAL(DP)`, dimension(:), intent(in), optional *f* ) [`private`]
- 5.33.1.12 subroutine, public `messy_main_tools::init_convect_tables` ( )
- 5.33.1.13 subroutine, public `messy_main_tools::int2str` ( `CHARACTER(LEN=*)`, intent(out) *str*, `INTEGER`, intent(in) *ii*, `CHARACTER`, intent(in), optional *cpad*, `CHARACTER`, intent(in), optional *cerr* )
- 5.33.1.14 subroutine, public `messy_main_tools::interpol_mid2stag` ( `REAL(DP)`, dimension(:,,:), intent(in) *mid\_field*, `REAL(DP)`, dimension(:,,:), intent(out) *stag\_field*, `INTEGER`, intent(in) *ie*, `INTEGER`, intent(in) *je*, `INTEGER`, intent(in) *ke*, `INTEGER`, intent(in) *intdim* )
- 5.33.1.15 subroutine, public `messy_main_tools::interpol_stag2mid` ( `REAL(DP)`, dimension(:,,:), intent(in) *stag\_field*, `REAL(DP)`, dimension(:,,:), intent(out) *mid\_field*, `INTEGER`, intent(in) *ie*, `INTEGER`, intent(in) *je*, `INTEGER`, intent(in) *ke*, `INTEGER`, intent(in) *intdim* )
- 5.33.1.16 subroutine `messy_main_tools::iso2ind_1d` ( `REAL(DP)`, dimension(:), intent(in) *field*, `REAL(DP)`, intent(in) *iso*, `INTEGER`, intent(out) *k*, `REAL(DP)`, intent(out), optional *f*, `LOGICAL`, intent(in), optional *lrev* )
- 5.33.1.17 subroutine `messy_main_tools::iso2ind_2d` ( `INTEGER`, intent(in) *kproma*, `REAL(DP)`, dimension(:,,:), intent(in) *field*, `REAL(DP)`, dimension(:), intent(in) *iso*, `INTEGER`, dimension(:), intent(out) *k*, `REAL(DP)`, dimension(:), intent(out), optional *f*, `LOGICAL`, intent(in), optional *lrev* ) [`private`]
- 5.33.1.18 ELEMENTAL `REAL(dp)` function, public `messy_main_tools::layerthickness` ( `REAL(dp)`, intent(in) *geopot\_u*, `REAL(dp)`, intent(in) *geopot\_l* )
- 5.33.1.19 ELEMENTAL `REAL(dp)` function, public `messy_main_tools::mass_density` ( `REAL(dp)`, intent(in) *press*, `REAL(dp)`, intent(in) *temp*, `REAL(dp)`, intent(in) *sphum* )
- 5.33.1.20 `LOGICAL` function, public `messy_main_tools::match_wild` ( `CHARACTER(LEN=*)`, intent(in) *pattern*, `CHARACTER(LEN=*)`, intent(in) *string* )
- 5.33.1.21 subroutine, public `messy_main_tools::nl_index` ( `REAL(DP)`, dimension(:), intent(in) *list*, `REAL(DP)`, intent(in) *value*, `INTEGER`, intent(out) *idx*, `INTEGER`, intent(out), optional *status* )



- 5.33.1.22 subroutine, public messy\_main\_tools::nn\_index ( REAL(DP), dimension(:), intent(in) *list*, REAL(DP), intent(in) *value*, INTEGER, intent(out) *idx*, INTEGER, intent(out), optional *idx2*, REAL(DP), intent(in), optional *fac*, INTEGER, intent(out), optional *status* )
- 5.33.1.23 subroutine, public messy\_main\_tools::ns\_index ( REAL(DP), dimension(:), intent(in) *list*, REAL(DP), intent(in) *value*, INTEGER, intent(out) *idx*, INTEGER, intent(out), optional *idx2*, LOGICAL, intent(in), optional *l\_periodic* )
- 5.33.1.24 REAL(dp) function, public messy\_main\_tools::psat\_mk ( REAL(dp), intent(in) *p\_temp*, LOGICAL, intent(in), optional *p\_l\_liquid* )
- 5.33.1.25 subroutine, public messy\_main\_tools::read\_nml\_check ( INTEGER, intent(in) *fstat*, CHARACTER(LEN=\*), intent(in) *substr*, INTEGER, intent(in) *iou*, CHARACTER(LEN=\*), intent(in) *nmlstr*, CHARACTER(LEN=\*), intent(in) *modstr* )
- 5.33.1.26 subroutine, public messy\_main\_tools::read\_nml\_close ( CHARACTER(LEN=\*), intent(in) *substr*, INTEGER, intent(in) *iou*, CHARACTER(LEN=\*), intent(in) *modstr* )
- 5.33.1.27 subroutine, public messy\_main\_tools::read\_nml\_open ( LOGICAL, intent(out) *lex*, CHARACTER(LEN=\*), intent(in) *substr*, INTEGER, intent(in) *iou*, CHARACTER(LEN=\*), intent(in) *nmlstr*, CHARACTER(LEN=\*), intent(in) *modstr* )
- 5.33.1.28 REAL(dp) function, public messy\_main\_tools::rel2spechum ( INTEGER, intent(out) *status*, REAL(dp), intent(in) *z\_relhum*, REAL(dp), intent(in) *z\_temp*, REAL(dp), intent(in) *z\_press*, LOGICAL, intent(in), optional *z\_l\_psat\_ema* )
- 5.33.1.29 REAL(dp) function, public messy\_main\_tools::rel2spechumwmo ( INTEGER, intent(out) *status*, REAL(dp), intent(in) *z\_relhum*, REAL(dp), intent(in) *z\_temp*, REAL(dp), intent(in) *z\_press*, LOGICAL, intent(in), optional *z\_l\_psat\_ema* )
- 5.33.1.30 REAL(dp) function, public messy\_main\_tools::relhum2mr ( INTEGER, intent(out) *status*, REAL(dp), intent(in) *z\_relhum*, REAL(dp), intent(in) *z\_temp*, REAL(dp), intent(in) *z\_press*, LOGICAL, intent(in) *z\_l\_psat\_ema* )
- 5.33.1.31 REAL(dp) function, public messy\_main\_tools::relhumwmo2mr ( INTEGER, intent(out) *status*, REAL(dp), intent(in) *z\_relhum*, REAL(dp), intent(in) *z\_temp*, REAL(dp), intent(in) *z\_press*, LOGICAL, intent(in) *z\_l\_psat\_ema* )
- 5.33.1.32 REAL(dp) function, dimension(:), pointer messy\_main\_tools::remap\_bounds1 ( INTEGER, intent(in) *lb1*, REAL(dp), dimension(lb1:), intent(in), target *array* )
- 5.33.1.33 REAL(dp) function, dimension(:, :), pointer messy\_main\_tools::remap\_bounds2 ( INTEGER, intent(in) *lb1*, INTEGER, intent(in) *lb2*, REAL(dp), dimension(lb1:, lb2:), intent(in), target *array* ) [private]

- 5.33.1.34 REAL(dp) function, dimension(:,:,:), pointer messy\_main\_tools::remap\_  
bounds3 ( INTEGER, intent(in) lb1, INTEGER, intent(in) lb2, INTEGER, intent(in) lb3,  
REAL(dp), dimension(lb1:,lb2:,lb3:), intent(in), target array ) [private]
- 5.33.1.35 REAL(dp) function, dimension(:,:,:), pointer messy\_main\_tools::remap\_  
bounds4 ( INTEGER, intent(in) lb1, INTEGER, intent(in) lb2, INTEGER, intent(in) lb3,  
INTEGER, intent(in) lb4, REAL(dp), dimension(lb1:,lb2:,lb3:,lb4:), intent(in), target  
array ) [private]
- 5.33.1.36 REAL(dp) function, public messy\_main\_tools::rh2mr ( INTEGER, intent(out)  
status, REAL(dp), intent(in) p\_relhum, REAL(dp), intent(in) p\_temp, REAL(dp),  
intent(in) p\_press, LOGICAL, intent(in), optional p\_l\_psat\_emac, LOGICAL, intent(in),  
optional p\_l\_relhum\_wmo )
- 5.33.1.37 REAL(dp) function, public messy\_main\_tools::spec2relhum ( INTEGER,  
intent(out) status, REAL(dp), intent(in) z\_spechum, REAL(dp), intent(in) z\_temp,  
REAL(dp), intent(in) z\_press, LOGICAL, intent(in), optional z\_l\_psat\_emac )
- 5.33.1.38 subroutine, public messy\_main\_tools::spec2relhum\_q ( INTEGER, intent(out)  
status, REAL(dp), intent(out) relhum, REAL(dp), intent(in) spechum, REAL(dp),  
intent(in) temp, REAL(dp), intent(in) press, LOGICAL, intent(in), optional liq\_only )
- 5.33.1.39 REAL(dp) function, public messy\_main\_tools::spec2relhumwmo ( INTEGER,  
intent(out) status, REAL(dp), intent(in) z\_spechum, REAL(dp), intent(in) z\_temp,  
REAL(dp), intent(in) z\_press, LOGICAL, intent(in), optional z\_l\_psat\_emac )
- 5.33.1.40 subroutine, public messy\_main\_tools::Spline1D ( REAL(dp), dimension(:),  
intent(in) X, REAL(dp), dimension(:), intent(in) Y, INTEGER, intent(in) N, REAL(dp),  
intent(in) YP1, REAL(dp), intent(in) YPN, REAL(dp), dimension(:), intent(out) Y2,  
LOGICAL, intent(in), optional natspline )
- 5.33.1.41 subroutine, public messy\_main\_tools::Splint1D ( REAL(dp), dimension(:),  
intent(in) XA, REAL(dp), dimension(:), intent(in) YA, REAL(dp), dimension(:), intent(in)  
Y2A, INTEGER, intent(in) N, REAL(dp), intent(in) X, REAL(dp), intent(out) Y,  
INTEGER, intent(out) status )
- 5.33.1.42 subroutine, public messy\_main\_tools::str2chob ( INTEGER, intent(out) status,  
CHARACTER(LEN=\*), intent(in) str, INTEGER, intent(out) n, CHARACTER(LEN=\*),  
dimension(:), pointer c, CHARACTER(LEN=\*), dimension(:), pointer o )
- 5.33.1.43 subroutine messy\_main\_tools::str2num\_integer ( CHARACTER(LEN=\*),  
intent(in) str, INTEGER, intent(out) out, INTEGER, intent(out), optional err )  
[private]
- 5.33.1.44 subroutine messy\_main\_tools::str2num\_real\_dp ( CHARACTER(LEN=\*),  
intent(in) str, REAL(dp), intent(out) out, INTEGER, intent(out), optional err )

- 5.33.1.45 subroutine messy\_main\_tools::str2num\_real\_sp ( CHARACTER(LEN=\*),  
intent(in) *str*, REAL(sp), intent(out) *out*, INTEGER, intent(out), optional *err* )  
[private]
- 5.33.1.46 CHARACTER(LEN=STRLEN\_LONG) function messy\_main\_tools::str\_integer ( INTEGER, intent(in) *zinteger*, CHARACTER(LEN=\*), intent(in), optional *fmt* )  
[private]
- 5.33.1.47 CHARACTER(LEN=5) function messy\_main\_tools::str\_logical ( LOGICAL, intent(in) *zlogical*, CHARACTER(LEN=\*), intent(in), optional *fmt* ) [private]
- 5.33.1.48 CHARACTER(LEN=STRLEN\_LONG) function messy\_main\_tools::str\_real\_dp ( REAL(dp), intent(in) *zreal\_dp*, CHARACTER(LEN=\*), intent(in), optional *fmt* )  
[private]
- 5.33.1.49 CHARACTER(LEN=STRLEN\_LONG) function messy\_main\_tools::str\_real\_sp ( REAL(sp), intent(in) *zreal\_sp*, CHARACTER(LEN=\*), intent(in), optional *fmt* )  
[private]
- 5.33.1.50 subroutine, public messy\_main\_tools::strcrack ( CHARACTER(LEN=\*),  
intent(in) *str*, CHARACTER, intent(in) *ch*, CHARACTER(LEN=\*), dimension(:), pointer  
*el*, INTEGER, intent(out) *n* )
- 5.33.1.51 subroutine, public messy\_main\_tools::ucase ( CHARACTER(LEN=\*),  
intent(inout) *string* )

## 5.33.2 Member Data Documentation

- 5.33.2.1 INTEGER, parameter, public messy\_main\_tools::jptlucu1 = 50000
- 5.33.2.2 INTEGER, parameter, public messy\_main\_tools::jptlucu2 = 400000
- 5.33.2.3 REAL(dp), dimension(jptlucu1:jptlucu2), target, save, public  
messy\_main\_tools::tlucua
- 5.33.2.4 REAL(dp), dimension(jptlucu1:jptlucu2), target, save, public  
messy\_main\_tools::tlucuaw
- 5.33.2.5 REAL(dp), dimension(jptlucu1:jptlucu2), target, save, public  
messy\_main\_tools::tlucub
- 5.33.2.6 REAL(dp), dimension(jptlucu1:jptlucu2), target, save, public  
messy\_main\_tools::tlucuc

The documentation for this module was generated from the following file:

- [/home/sander/e2/messy\\_d2.50s\\_rs/messy/mbm/caaba/messy\\_main\\_tools.f90](/home/sander/e2/messy_d2.50s_rs/messy/mbm/caaba/messy_main_tools.f90)

## 5.34 messy\_main\_tools\_kp4\_compress Module Reference

### Data Types

- interface [kco\\_compress](#)
- interface [kco\\_finalize](#)
- interface [kco\\_initialize](#)

### Public Member Functions

- subroutine, public [kco\\_initialize](#) (npoints\_initial, f, IERR, Kacc, Krej)
- subroutine, public [kco\\_compress](#) (n\_points, T, H, Hnew, IERR, f, RCONST, FIX, RejectLastH, RejectMoreH, Kacc, Krej)
- subroutine, public [kco\\_finalize](#) (f, IERR, Kacc, Krej)

### Public Attributes

- integer, dimension(:), allocatable, public [index\\_org](#)
- logical, dimension(:), allocatable, public [cell\\_done](#)

### Private Attributes

- INTEGER, parameter [dp](#) = SELECTED\_REAL\_KIND(12, 307)
- integer [kpoints](#)
- integer [kpoints\\_save](#)
- integer, dimension(:), allocatable [index\\_step](#)
- logical, dimension(:), allocatable [done\\_check](#)
- real(kind=[dp](#)), dimension(:,:), allocatable [f\\_done](#)
- integer, dimension(:), allocatable [Kacc\\_done](#)
- integer, dimension(:), allocatable [Krej\\_done](#)
- integer, dimension(:), allocatable [ierr\\_done](#)

### 5.34.1 Member Function/Subroutine Documentation

- 5.34.1.1 subroutine, public messy\_main\_tools\_kp4\_compress::kco\_compress  
 ( integer, intent(inout) *n\_points*, real(kind=[dp](#)), dimension(:), intent(inout) *T*,  
 real(kind=[dp](#)), dimension(:), intent(inout) *H*, real(kind=[dp](#)), dimension(:), intent(inout)  
*Hnew*, INTEGER, dimension(:), intent(inout) *IERR*, real(kind=[dp](#)), dimension(:,:),  
 intent(inout) *f*, real(kind=[dp](#)), dimension(:,:), intent(inout) *RCONST*, real(kind=[dp](#)),  
 dimension(:,:), intent(inout) *FIX*, LOGICAL, dimension(:), intent(inout) *RejectLastH*,  
 LOGICAL, dimension(:), intent(inout) *RejectMoreH*, integer, dimension(:), intent(inout)  
*Kacc*, integer, dimension(:), intent(inout) *Krej* )

5.34.1.2 subroutine, public messy\_main\_tools\_kp4\_compress::kco\_finalize (  
 real(kind=dp), dimension(:,:), intent(inout) *f*, integer, dimension(:), intent(inout) *IERR*,  
 integer, dimension(:), intent(inout) *Kacc*, integer, dimension(:), intent(inout) *Krej* )

5.34.1.3 subroutine, public messy\_main\_tools\_kp4\_compress::kco\_initialize (  
 integer, intent(in) *npoints\_initial*, real(kind=dp), dimension(:,:), intent(in) *f*, integer,  
 dimension(:), intent(in) *IERR*, integer, dimension(:), intent(in) *Kacc*, integer,  
 dimension(:), intent(in) *Krej* )

## 5.34.2 Member Data Documentation

5.34.2.1 logical, dimension(:), allocatable, public messy\_main\_tools\_kp4\_compress-  
 ::cell\_done

5.34.2.2 logical, dimension(:), allocatable messy\_main\_tools\_kp4\_compress::done\_  
 check [private]

5.34.2.3 INTEGER, parameter messy\_main\_tools\_kp4\_compress::dp =  
 SELECTED\_REAL\_KIND(12, 307) [private]

5.34.2.4 real(kind=dp), dimension(:,:), allocatable messy\_main\_tools\_kp4\_compress::f-  
 \_done [private]

5.34.2.5 integer, dimension(:), allocatable messy\_main\_tools\_kp4\_compress::ierr\_  
 done [private]

5.34.2.6 integer, dimension(:), allocatable, public messy\_main\_tools\_kp4\_compress-  
 ::index\_org

5.34.2.7 integer, dimension(:), allocatable messy\_main\_tools\_kp4\_compress::index\_  
 step [private]

5.34.2.8 integer, dimension(:), allocatable messy\_main\_tools\_kp4\_compress::Kacc\_  
 done [private]

5.34.2.9 integer messy\_main\_tools\_kp4\_compress::kpoints [private]

5.34.2.10 integer messy\_main\_tools\_kp4\_compress::kpoints\_save [private]

5.34.2.11 integer, dimension(:), allocatable messy\_main\_tools\_kp4\_compress::Krej\_  
 done [private]

The documentation for this module was generated from the following file:

- /home/sander/e2/messy\_d2.50s\_rs/messy/mbm/caaba/messy\_main\_tools\_kp4-  
 \_compress.f90

## 5.35 messy\_mecca Module Reference

### Public Member Functions

- subroutine, public [mecca\\_read\\_nml\\_ctrl](#) (status, iou)
- subroutine, public [initialize\\_kpp\\_variables](#)
- LOGICAL function, public [steady\\_state\\_reached](#) (c, timesteplen)
- subroutine, public [define\\_mcexp](#) (status, mcexp)

### Public Attributes

- CHARACTER(LEN=\*), parameter, public [modstr](#) = 'mecca'
- CHARACTER(LEN=\*), parameter, public [modver](#) = '3.7g'
- LOGICAL, save, public [l\\_aero](#)
- CHARACTER(LEN=STRLEN\_SHORT), save, public [mecca\\_aero](#) = 'AUTO'
- LOGICAL, save, public [l\\_force\\_khet](#) = .FALSE.
- LOGICAL, save, public [l\\_kpp\\_debug](#) = .FALSE.
- LOGICAL, save, public [l\\_tag](#) = .FALSE.
- LOGICAL, save, public [l\\_dbl](#) = .FALSE.
- INTEGER, save, public [mcexp\\_seed](#) = 0

### 5.35.1 Member Function/Subroutine Documentation

- 5.35.1.1 subroutine, public `messy_mecca::define_mcexp` ( `INTEGER`, intent(out) *status*, `REAL(DP)`, dimension(:), intent(out) *mcexp* )
- 5.35.1.2 subroutine, public `messy_mecca::initialize_kpp_variables` ( )
- 5.35.1.3 subroutine, public `messy_mecca::mecca_read_nml_ctrl` ( `INTEGER`, intent(out) *status*, `INTEGER`, intent(in) *iou* )
- 5.35.1.4 LOGICAL function, public `messy_mecca::steady_state_reached` ( `REAL(DP)`, dimension(:), intent(in) *c*, `REAL(DP)`, intent(in) *timesteplen* )

### 5.35.2 Member Data Documentation

- 5.35.2.1 LOGICAL, save, public `messy_mecca::l_aero`
- 5.35.2.2 LOGICAL, save, public `messy_mecca::l_dbl` = .FALSE.
- 5.35.2.3 LOGICAL, save, public `messy_mecca::l_force_khet` = .FALSE.
- 5.35.2.4 LOGICAL, save, public `messy_mecca::l_kpp_debug` = .FALSE.
- 5.35.2.5 LOGICAL, save, public `messy_mecca::l_tag` = .FALSE.

5.35.2.6 INTEGER, save, public messy\_mecca::mcexp\_seed = 0

5.35.2.7 CHARACTER(LEN=STRLEN\_SHORT), save, public messy\_mecca::mecca\_aero = 'AUTO'

5.35.2.8 CHARACTER(LEN=\*), parameter, public messy\_mecca::modstr = 'mecca'

5.35.2.9 CHARACTER(LEN=\*), parameter, public messy\_mecca::modver = '3.7g'

The documentation for this module was generated from the following file:

- /home/sander/e2/messy\_d2.50s\_rs/messy/mbm/caaba/[messy\\_mecca.f90](#)

## 5.36 messy\_mecca\_aero Module Reference

### Public Member Functions

- subroutine, public [mecca\\_aero\\_init\\_gasaq](#) (l\_print)
- subroutine, public [mecca\\_aero\\_calc\\_k\\_ex](#) (radius, temp, press, loghet, xaer, lwc, C, k\_exf, k\_exb, k\_exf\_N2O5, k\_exf\_CINO3, k\_exf\_BrNO3)
- subroutine, public [mecca\\_aero\\_calc\\_k\\_ex\\_ocean](#) (xaer, radius, temp, zmix, k\_exf, k\_exb)
- subroutine, public [mecca\\_aero\\_diag](#) (zmr\_Brsalt, zmr\_Brorg, zmr\_BrSScap, zmrac\_Brsalt, zmrac\_Brorg, zmrac\_BrSScap)

### Public Attributes

- CHARACTER(len=\*), parameter, public [submodstr](#) = 'mecca\_aero'

### Private Attributes

- REAL(DP) [alpha\\_T0](#)
- REAL(DP) [alpha\\_Tdep](#)
- REAL(DP) [Henry\\_T0](#)
- REAL(DP) [Henry\\_Tdep](#)
- REAL(DP), dimension(0:nspec) [molar\\_mass](#)

### 5.36.1 Member Function/Subroutine Documentation

5.36.1.1 subroutine, public messy\_mecca\_aero::mecca\_aero\_calc\_k\_ex ( REAL(DP), dimension(:), intent(in) *radius*, REAL(DP), intent(in) *temp*, REAL(DP), intent(in) *press*, LOGICAL, dimension(:), intent(in) *loghet*, REAL(DP), dimension(:), intent(in) *xaer*, REAL(DP), dimension(:), intent(in) *lwc*, REAL(DP), dimension(:), intent(in) *C*, REAL(DP), dimension(:, :), intent(out) *k\_exf*, REAL(DP), dimension(:, :), intent(out) *k\_exb*, REAL(DP), dimension(:), intent(out) *k\_exf\_N2O5*, REAL(DP), dimension(:), intent(out) *k\_exf\_CINO3*, REAL(DP), dimension(:), intent(out) *k\_exf\_BrNO3* )

5.36.1.2 subroutine, public messy\_mecca\_aero::mecca\_aero\_calc\_k\_ex\_ocean ( REAL(dp), dimension(:), intent(in) *xaer*, REAL(dp), dimension(:), intent(in) *radius*, REAL(DP), intent(in) *temp*, REAL(dp), intent(in) *zmix*, REAL(dp), dimension(:, :), intent(inout) *k\_exf*, REAL(dp), dimension(:, :), intent(inout) *k\_exb* )

Here is the call graph for this function:

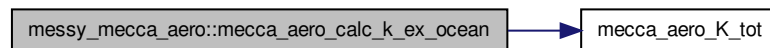

5.36.1.3 subroutine, public messy\_mecca\_aero::mecca\_aero\_diag ( REAL(DP), intent(in) *zmr\_Brsalt*, REAL(DP), intent(in) *zmr\_Brorg*, REAL(DP), intent(in) *zmr\_BrSScap*, REAL(DP), intent(inout) *zmrac\_Brsalt*, REAL(DP), intent(inout) *zmrac\_Brorg*, REAL(DP), intent(in) *zmrac\_BrSScap* )

5.36.1.4 subroutine, public messy\_mecca\_aero::mecca\_aero\_init\_gasaq ( LOGICAL, intent(in), optional *I\_print* )

## 5.36.2 Member Data Documentation

5.36.2.1 REAL(DP) messy\_mecca\_aero::alpha\_T0 [private]

5.36.2.2 REAL(DP) messy\_mecca\_aero::alpha\_Tdep [private]

5.36.2.3 REAL(DP) messy\_mecca\_aero::Henry\_T0 [private]

5.36.2.4 REAL(DP) messy\_mecca\_aero::Henry\_Tdep [private]

5.36.2.5 REAL(DP), dimension(0:nspec) messy\_mecca\_aero::molar\_mass [private]



5.36.2.6 CHARACTER(len=\*), parameter, public messy\_mecca\_aero::submodstr =  
'mecca\_aero'

The documentation for this module was generated from the following file:

- /home/sander/e2/messy\_d2.50s\_rs/messy/mbm/caaba/messy\_mecca\_aero.f90

## 5.37 messy\_mecca\_box Module Reference

### Public Member Functions

- subroutine, public [mecca\\_init](#)
- subroutine [define\\_aerosol](#)
- subroutine [x0](#)
- subroutine, public [mecca\\_physc](#)
- subroutine, public [mecca\\_result](#)
- subroutine, public [mecca\\_finish](#)

### Public Attributes

- INTEGER, parameter [NBL](#) = 1
- REAL(DP), dimension(ip\_max) [jx](#) = 0.
- REAL(DP), dimension(:), allocatable [xaer](#)
- REAL(DP), dimension(apn) [cvfac](#)
- REAL(DP), dimension(:), allocatable [lwc](#)
- REAL(DP), dimension(apn, nspec) [k\\_exf](#)
- REAL(DP), dimension(apn, nspec) [k\\_exb](#)
- REAL(DP) [k\\_exf\\_N2O5](#)
- REAL(DP) [k\\_exf\\_CINO3](#)
- REAL(DP) [k\\_exf\\_BrNO3](#)
- REAL(DP) [dummy\\_khet\\_Tr](#)
- REAL(DP) [dummy\\_khet\\_St](#)
- REAL(DP), dimension(nspec) [output](#)
- CHARACTER(LEN=20), dimension(nspec) [c\\_unit](#)
- INTEGER [ncid\\_aero](#)
- INTEGER [ncid\\_tracer](#)
- INTEGER [ncid\\_spec](#)
- REAL(DP) [HCO3m\\_rel](#)
- REAL(DP) [NO3m\\_rel](#)
- REAL(DP) [Clm\\_rel](#)
- REAL(DP) [Brm\\_rel](#)
- REAL(DP) [Im\\_rel](#)
- REAL(DP) [IO3m\\_rel](#)
- REAL(DP) [SO4mm\\_rel](#)
- REAL(DP), dimension(:), allocatable [csalt](#)

- REAL(DP), dimension(:), allocatable [exchng](#)
- REAL(DP), dimension(:), allocatable [radius](#)
- REAL(DP), dimension(:), allocatable [c0\\_NH4p](#)
- REAL(DP), dimension(:), allocatable [c0\\_Nap](#)
- REAL(DP), dimension(:), allocatable [c0\\_HCO3m](#)
- REAL(DP), dimension(:), allocatable [c0\\_NO3m](#)
- REAL(DP), dimension(:), allocatable [c0\\_Clm](#)
- REAL(DP), dimension(:), allocatable [c0\\_Brm](#)
- REAL(DP), dimension(:), allocatable [c0\\_Im](#)
- REAL(DP), dimension(:), allocatable [c0\\_IO3m](#)
- REAL(DP), dimension(:), allocatable [c0\\_SO4mm](#)
- REAL(DP), dimension(:), allocatable [c0\\_HSO4m](#)
- REAL(DP), dimension(max\_mcexp) [mcexp](#)

### 5.37.1 Member Function/Subroutine Documentation

5.37.1.1 subroutine `messy_mecca_box::define_aerosol` ( )

5.37.1.2 subroutine, public `messy_mecca_box::mecca_finish` ( )

5.37.1.3 subroutine, public `messy_mecca_box::mecca_init` ( )

5.37.1.4 subroutine, public `messy_mecca_box::mecca_physc` ( )

Here is the call graph for this function:

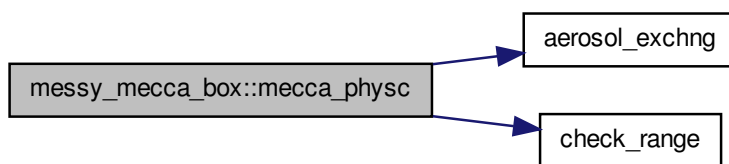

5.37.1.5 subroutine, public `messy_mecca_box::mecca_result` ( )

## 5.37.1.6 subroutine messy\_mecca\_box::x0 ( )

Here is the call graph for this function:

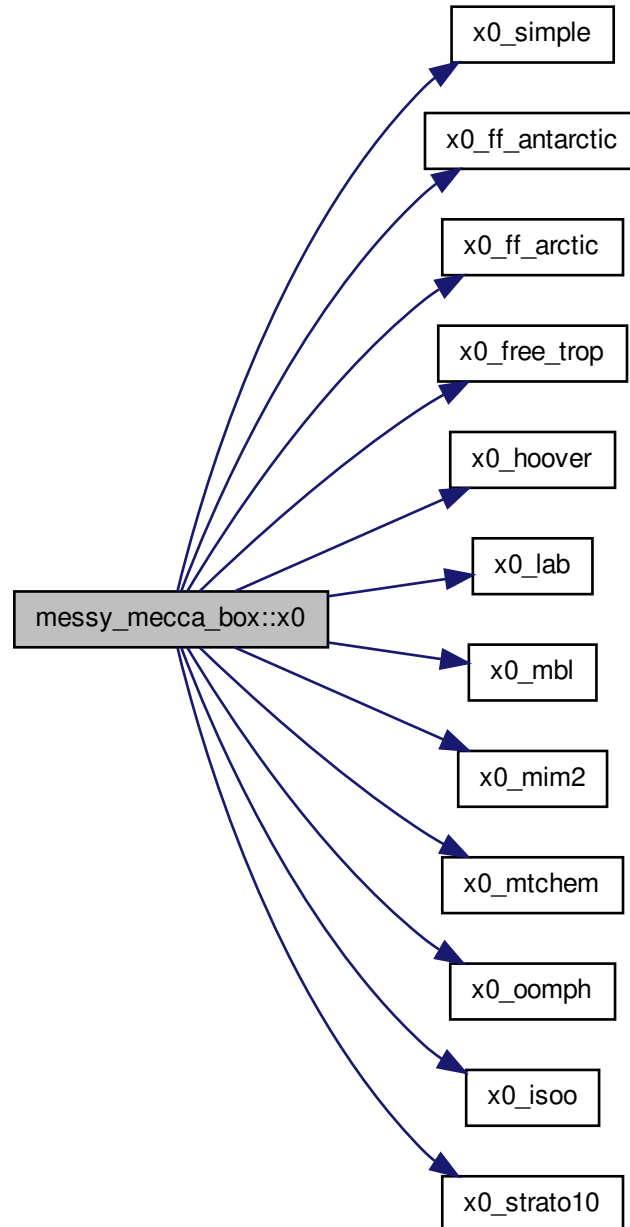

### 5.37.2 Member Data Documentation

- 5.37.2.1 REAL(DP) messy\_mecca\_box::Brm\_rel
- 5.37.2.2 REAL(DP), dimension(:), allocatable messy\_mecca\_box::c0\_Brm
- 5.37.2.3 REAL(DP), dimension(:), allocatable messy\_mecca\_box::c0\_Clm
- 5.37.2.4 REAL(DP), dimension(:), allocatable messy\_mecca\_box::c0\_HCO3m
- 5.37.2.5 REAL(DP), dimension(:), allocatable messy\_mecca\_box::c0\_HSO4m
- 5.37.2.6 REAL(DP), dimension(:), allocatable messy\_mecca\_box::c0\_lm
- 5.37.2.7 REAL(DP), dimension(:), allocatable messy\_mecca\_box::c0\_IO3m
- 5.37.2.8 REAL(DP), dimension(:), allocatable messy\_mecca\_box::c0\_Nap
- 5.37.2.9 REAL(DP), dimension(:), allocatable messy\_mecca\_box::c0\_NH4p
- 5.37.2.10 REAL(DP), dimension(:), allocatable messy\_mecca\_box::c0\_NO3m
- 5.37.2.11 REAL(DP), dimension(:), allocatable messy\_mecca\_box::c0\_SO4mm
- 5.37.2.12 CHARACTER(LEN=20), dimension(nspec) messy\_mecca\_box::c\_unit
- 5.37.2.13 REAL(DP) messy\_mecca\_box::CIm\_rel
- 5.37.2.14 REAL(DP), dimension(:), allocatable messy\_mecca\_box::csalt
- 5.37.2.15 REAL(DP), dimension(apn) messy\_mecca\_box::cvfac
- 5.37.2.16 REAL(DP) messy\_mecca\_box::dummy\_khet\_St
- 5.37.2.17 REAL(DP) messy\_mecca\_box::dummy\_khet\_Tr
- 5.37.2.18 REAL(DP), dimension(:), allocatable messy\_mecca\_box::exchnng
- 5.37.2.19 REAL(DP) messy\_mecca\_box::HCO3m\_rel
- 5.37.2.20 REAL(DP) messy\_mecca\_box::lm\_rel
- 5.37.2.21 REAL(DP) messy\_mecca\_box::IO3m\_rel
- 5.37.2.22 REAL(DP), dimension(ip\_max) messy\_mecca\_box::jx = 0.
- 5.37.2.23 REAL(DP), dimension(apn,nspec) messy\_mecca\_box::k\_exb

- 5.37.2.24 REAL(DP), dimension(apn,nspec) messy\_mecca\_box::k\_exf
- 5.37.2.25 REAL(DP) messy\_mecca\_box::k\_exf\_BrNO3
- 5.37.2.26 REAL(DP) messy\_mecca\_box::k\_exf\_CINO3
- 5.37.2.27 REAL(DP) messy\_mecca\_box::k\_exf\_N2O5
- 5.37.2.28 REAL(DP), dimension(:), allocatable messy\_mecca\_box::lwc
- 5.37.2.29 REAL(DP), dimension(max\_mcexp) messy\_mecca\_box::mcexp
- 5.37.2.30 INTEGER, parameter messy\_mecca\_box::NBL = 1
- 5.37.2.31 INTEGER messy\_mecca\_box::ncid\_aero
- 5.37.2.32 INTEGER messy\_mecca\_box::ncid\_spec
- 5.37.2.33 INTEGER messy\_mecca\_box::ncid\_tracer
- 5.37.2.34 REAL(DP) messy\_mecca\_box::NO3m\_rel
- 5.37.2.35 REAL(DP), dimension(nspec) messy\_mecca\_box::output
- 5.37.2.36 REAL(DP), dimension(:), allocatable messy\_mecca\_box::radius
- 5.37.2.37 REAL(DP) messy\_mecca\_box::SO4mm\_rel
- 5.37.2.38 REAL(DP), dimension(:), allocatable messy\_mecca\_box::xaer

The documentation for this module was generated from the following file:

- [/home/sander/e2/messy\\_d2.50s\\_rs/messy/mbm/caaba/messy\\_mecca\\_box.f90](#)

## 5.38 messy\_mecca\_dbl\_box Module Reference

### Public Member Functions

- subroutine [mecca\\_dbl\\_x0](#)
- subroutine, public [mecca\\_dbl\\_emis](#)
- subroutine, public [mecca\\_dbl\\_preprocess](#)
- subroutine, public [mecca\\_dbl\\_postprocess](#)
- subroutine, public [mecca\\_dbl\\_init](#)
- subroutine, public [mecca\\_dbl\\_result](#) (model\_time)
- subroutine, public [mecca\\_dbl\\_finish](#)

### 5.38.1 Member Function/Subroutine Documentation

- 5.38.1.1 subroutine, public `messy_mecca_dbl_box::mecca_dbl_emis` ( )
- 5.38.1.2 subroutine, public `messy_mecca_dbl_box::mecca_dbl_finish` ( )
- 5.38.1.3 subroutine, public `messy_mecca_dbl_box::mecca_dbl_init` ( )
- 5.38.1.4 subroutine, public `messy_mecca_dbl_box::mecca_dbl_postprocess` ( )
- 5.38.1.5 subroutine, public `messy_mecca_dbl_box::mecca_dbl_preprocess` ( )
- 5.38.1.6 subroutine, public `messy_mecca_dbl_box::mecca_dbl_result` ( `REAL(dp)`,  
intent(in) *model\_time* )
- 5.38.1.7 subroutine `messy_mecca_dbl_box::mecca_dbl_x0` ( )

The documentation for this module was generated from the following file:

- [/home/sander/e2/messy\\_d2.50s\\_rs/messy/mbm/caaba/messy\\_mecca\\_dbl\\_box.f90](#)

## 5.39 messy\_mecca\_khet Module Reference

### Public Member Functions

- subroutine, public `mecca_khet_read_nml_ctrl` (status, iou)
- ELEMENTAL `REAL(dp)` function, public `k_mt` (M, T, A, gamma)

### Public Attributes

- `CHARACTER(LEN=*)`, parameter, public `submodstr` = `modstr/'_khet'`
- `LOGICAL`, save, public `l_troposphere` = `.FALSE.`
- `LOGICAL`, save, public `l_stratosphere` = `.FALSE.`
- `REAL(dp)`, parameter, public `M_HNO3` = `63.012_dp`
- `REAL(dp)`, parameter, public `M_N2O5` = `108.00_dp`
- `REAL(dp)`, parameter, public `gamma_N2O5` = `0.02_dp`
- `REAL(dp)`, parameter, public `gamma_HNO3` = `0.1_dp`
- `REAL(dp)`, parameter, public `gamma_Hg` = `0.0_dp`
- `REAL(dp)`, parameter, public `gamma_RGM` = `0.1_dp`

### 5.39.1 Member Function/Subroutine Documentation

- 5.39.1.1 ELEMENTAL REAL(dp) function, public messy\_mecca\_khet::k\_mt ( REAL(dp), intent(in) *M*, REAL(dp), intent(in) *T*, REAL(dp), intent(in) *A*, REAL(dp), intent(in) *gamma* )
- 5.39.1.2 subroutine, public messy\_mecca\_khet::mecca\_khet\_read\_nml\_ctrl ( INTEGER, intent(out) *status*, INTEGER, intent(in) *iou* )
- 5.39.2 Member Data Documentation
- 5.39.2.1 REAL(dp), parameter, public messy\_mecca\_khet::gamma\_Hg = 0.0\_dp
- 5.39.2.2 REAL(dp), parameter, public messy\_mecca\_khet::gamma\_HNO3 = 0.1\_dp
- 5.39.2.3 REAL(dp), parameter, public messy\_mecca\_khet::gamma\_N2O5 = 0.02\_dp
- 5.39.2.4 REAL(dp), parameter, public messy\_mecca\_khet::gamma\_RGM = 0.1\_dp
- 5.39.2.5 LOGICAL, save, public messy\_mecca\_khet::l\_stratosphere = .FALSE.
- 5.39.2.6 LOGICAL, save, public messy\_mecca\_khet::l\_troposphere = .FALSE.
- 5.39.2.7 REAL(dp), parameter, public messy\_mecca\_khet::M\_HNO3 = 63.012\_dp
- 5.39.2.8 REAL(dp), parameter, public messy\_mecca\_khet::M\_N2O5 = 108.00\_dp
- 5.39.2.9 CHARACTER(LEN=\*), parameter, public messy\_mecca\_khet::submodstr = modstr//'\_khet'

The documentation for this module was generated from the following file:

- /home/sander/e2/messy\_d2.50s\_rs/messy/mbm/caaba/[messy\\_mecca\\_khet.f90](#)

## 5.40 messy\_mecca\_kpp Module Reference

### Public Member Functions

- subroutine [initialize\\_kpp\\_ctrl](#) (status, iou, modstr)
- subroutine [error\\_output](#) (C, ierr, PE)
- subroutine [kpp\\_integrate](#) (time\_step, Conc, ierrf, xNacc, xNrej, istatus, l\_debug, PE)
- subroutine [fill\\_TEMP](#) (status, array)
- subroutine [fill\\_cair](#) (status, array)
- subroutine [fill\\_press](#) (status, array)
- subroutine [fill\\_mcexp](#) (status, array)
- subroutine [fill\\_xaer](#) (status, array)
- subroutine [fill\\_cvfac](#) (status, array)

- subroutine [fill\\_lwc](#) (status, array)
- subroutine [fill\\_k\\_exf](#) (status, array)
- subroutine [fill\\_k\\_exb](#) (status, array)
- subroutine [fill\\_k\\_exf\\_N2O5](#) (status, array)
- subroutine [fill\\_k\\_exf\\_CINO3](#) (status, array)
- subroutine [fill\\_k\\_exf\\_BrNO3](#) (status, array)
- subroutine [fill\\_JX](#) (status, array)
- subroutine [fill\\_khet\\_Tr](#) (status, array)
- subroutine [fill\\_khet\\_St](#) (status, array)
- subroutine [fill\\_temp\\_ion](#) (status, array)
- subroutine [fill\\_temp\\_elec](#) (status, array)

### Public Attributes

- INTEGER, parameter [NMAXFIXSTEPS](#) = 50
- LOGICAL, public [l\\_fixed\\_step](#) = .FALSE.
- INTEGER, public [nfsteps](#) = 1
- INTEGER, parameter, public [NKPPCTRL](#) = 20
- INTEGER, dimension(nkppctrl), public [icntrl](#) = 0
- REAL(DP), dimension(nkppctrl), public [rcntrl](#) = 0.0\_dp
- REAL(DP), dimension(nmaxfixsteps), public [t\\_steps](#) = 0.0\_dp

### 5.40.1 Member Function/Subroutine Documentation

- 5.40.1.1 subroutine [messy\\_mecca\\_kpp::error\\_output](#) ( REAL(dp), dimension(:), intent(in) C, INTEGER, intent(in) *ierr*, INTEGER, intent(in) *PE* )
- 5.40.1.2 subroutine [messy\\_mecca\\_kpp::fill\\_cair](#) ( INTEGER, intent(out) *status*, REAL (dp), dimension(:), intent(in) *array* )
- 5.40.1.3 subroutine [messy\\_mecca\\_kpp::fill\\_cvfac](#) ( INTEGER, intent(out) *status*, REAL (dp), dimension(:, :, :), intent(in) *array* )
- 5.40.1.4 subroutine [messy\\_mecca\\_kpp::fill\\_JX](#) ( INTEGER, intent(out) *status*, REAL (dp), dimension(:, :, :), intent(in) *array* )
- 5.40.1.5 subroutine [messy\\_mecca\\_kpp::fill\\_k\\_exb](#) ( INTEGER, intent(out) *status*, REAL (dp), dimension(:, :, :), intent(in) *array* )
- 5.40.1.6 subroutine [messy\\_mecca\\_kpp::fill\\_k\\_exf](#) ( INTEGER, intent(out) *status*, REAL (dp), dimension(:, :, :), intent(in) *array* )
- 5.40.1.7 subroutine [messy\\_mecca\\_kpp::fill\\_k\\_exf\\_BrNO3](#) ( INTEGER, intent(out) *status*, REAL (dp), dimension(:, :, :), intent(in) *array* )



- 5.40.1.8 subroutine messy\_mecca\_kpp::fill\_k\_exf\_CINO3 ( INTEGER, intent(out) *status*, REAL (dp), dimension(:,:), intent(in) *array* )
- 5.40.1.9 subroutine messy\_mecca\_kpp::fill\_k\_exf\_N2O5 ( INTEGER, intent(out) *status*, REAL (dp), dimension(:,:), intent(in) *array* )
- 5.40.1.10 subroutine messy\_mecca\_kpp::fill\_khet\_St ( INTEGER, intent(out) *status*, REAL (dp), dimension(:,:), intent(in) *array* )
- 5.40.1.11 subroutine messy\_mecca\_kpp::fill\_khet\_Tr ( INTEGER, intent(out) *status*, REAL (dp), dimension(:,:), intent(in) *array* )
- 5.40.1.12 subroutine messy\_mecca\_kpp::fill\_lwc ( INTEGER, intent(out) *status*, REAL (dp), dimension(:,:), intent(in) *array* )
- 5.40.1.13 subroutine messy\_mecca\_kpp::fill\_mcexp ( INTEGER, intent(out) *status*, REAL (dp), dimension(:,:), intent(in) *array* )
- 5.40.1.14 subroutine messy\_mecca\_kpp::fill\_press ( INTEGER, intent(out) *status*, REAL (dp), dimension(:,:), intent(in) *array* )
- 5.40.1.15 subroutine messy\_mecca\_kpp::fill\_TEMP ( INTEGER, intent(out) *status*, REAL (dp), dimension(:,:), intent(in) *array* )
- 5.40.1.16 subroutine messy\_mecca\_kpp::fill\_temp\_elec ( INTEGER, intent(out) *status*, REAL (dp), dimension(:,:), intent(in) *array* )
- 5.40.1.17 subroutine messy\_mecca\_kpp::fill\_temp\_ion ( INTEGER, intent(out) *status*, REAL (dp), dimension(:,:), intent(in) *array* )
- 5.40.1.18 subroutine messy\_mecca\_kpp::fill\_xaer ( INTEGER, intent(out) *status*, REAL (dp), dimension(:,:), intent(in) *array* )
- 5.40.1.19 subroutine messy\_mecca\_kpp::initialize\_kpp\_ctrl ( INTEGER, intent(out) *status*, INTEGER, intent(in) *iou*, CHARACTER(LEN=\*), intent(in) *modstr* )

Here is the call graph for this function:

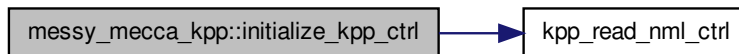

5.40.1.20 subroutine `messy_mecca_kpp::kpp_integrate` ( `REAL(dp)`, intent(in) *time\_step*, `REAL(dp)`, dimension(:,:), intent(inout) *Conc*, `INTEGER`, dimension(:), intent(out), optional *ierrf*, `INTEGER`, dimension(:), intent(out), optional *xNacc*, `INTEGER`, dimension(:), intent(out), optional *xNrej*, `INTEGER`, dimension(:), intent(inout), optional *istatus*, `LOGICAL`, intent(in), optional *l\_debug*, `INTEGER`, intent(in), optional *PE* )

## 5.40.2 Member Data Documentation

5.40.2.1 `INTEGER`, dimension(`nkppctrl`), public `messy_mecca_kpp::icntrl` = 0

5.40.2.2 `LOGICAL`, public `messy_mecca_kpp::l_fixed_step` = `.FALSE.`

5.40.2.3 `INTEGER`, public `messy_mecca_kpp::nfsteps` = 1

5.40.2.4 `INTEGER`, parameter, public `messy_mecca_kpp::NKPPCTRL` = 20

5.40.2.5 `INTEGER`, parameter `messy_mecca_kpp::NMAXFIXSTEPS` = 50

5.40.2.6 `REAL(DP)`, dimension(`nkppctrl`), public `messy_mecca_kpp::rcntrl` = 0.0\_dp

5.40.2.7 `REAL(DP)`, dimension(`nmaxfixsteps`), public `messy_mecca_kpp::t_steps` = 0.0\_dp

The documentation for this module was generated from the following file:

- `/home/sander/e2/messy_d2.50s_rs/messy/mbm/caaba/messy_mecca_kpp.f90`

## 5.41 messy\_mecca\_kpp Function Module Reference

### Public Member Functions

- subroutine `Fun` (`V`, `F`, `RCT`, `Vdot`)

### Public Attributes

- `REAL(kind=dp)` `A`

## 5.41.1 Member Function/Subroutine Documentation

5.41.1.1 subroutine `messy_mecca_kpp_Function::Fun` ( `REAL(kind=dp)`, dimension(`nvar`) *V*, `REAL(kind=dp)`, dimension(`nfix`) *F*, `REAL(kind=dp)`, dimension(`nreact`) *RCT*, `REAL(kind=dp)`, dimension(`nvar`) *Vdot* )

## 5.41.2 Member Data Documentation

## 5.41.2.1 REAL(kind=dp) messy\_mecca\_kpp\_Function::A

The documentation for this module was generated from the following file:

- [/home/sander/e2/messy\\_d2.50s\\_rs/messy/mbm/caaba/messy\\_mecca\\_kpp\\_function.f90](#)

## 5.42 messy\_mecca\_kpp\_Global Module Reference

## Public Attributes

- REAL(kind=dp) [C](#)
- REAL(kind=dp) [VAR](#)
- REAL(kind=dp) [FIX](#)
- REAL(kind=dp) [RCONST](#)
- REAL(kind=dp) [TIME](#)
- REAL(kind=dp) [SUN](#)
- REAL(kind=dp) [TEMP](#)
- REAL(kind=dp) [TSTART](#)
- REAL(kind=dp) [TEND](#)
- REAL(kind=dp) [DT](#)
- REAL(kind=dp) [ATOL](#)
- REAL(kind=dp) [RTOL](#)
- REAL(kind=dp) [STEPMIN](#)
- REAL(kind=dp) [STEPMAX](#)
- REAL(kind=dp) [CFACTOR](#)
- CHARACTER(LEN=\*), parameter, public [timestamp](#) = 'xmecca was run on 2015-06-20 at 14:09:00 by sander on machine bromine'
- CHARACTER(LEN=\*), parameter, public [batchfile](#) = 'simple'
- CHARACTER(LEN=\*), parameter, public [gas\\_spc\\_file](#) = '-rw----- 1 sander sander 35285 Nov 7 2014 gas.spc'
- CHARACTER(LEN=\*), parameter, public [aqueous\\_spc\\_file](#) = '-rw----- 1 sander sander 8444 Apr 19 2010 aqueous.spc'
- CHARACTER(LEN=\*), parameter, public [gas\\_eqn\\_file](#) = '-rw-r--r-- 1 sander sander 150920 Mar 23 16:46 gas.eqn'
- CHARACTER(LEN=\*), parameter, public [aqueous\\_eqn\\_file](#) = '-rw----- 1 sander sander 58889 Mar 26 16:22 aqueous.eqn'
- CHARACTER(LEN=\*), parameter, public [gas\\_spc\\_file\\_sum](#) = '14323 35'
- CHARACTER(LEN=\*), parameter, public [aqueous\\_spc\\_file\\_sum](#) = '54945 9'
- CHARACTER(LEN=\*), parameter, public [gas\\_eqn\\_file\\_sum](#) = '61164 148'
- CHARACTER(LEN=\*), parameter, public [aqueous\\_eqn\\_file\\_sum](#) = '42695 58'
- CHARACTER(LEN=\*), parameter, public [rplfile](#) = ''
- CHARACTER(LEN=\*), parameter, public [wanted](#) = 'Tr && G && !C && !S && !Cl && !Br && !I && !Hg'
- CHARACTER(LEN=\*), parameter, public [diagtracfile](#) = ''
- CHARACTER(LEN=\*), parameter, public [rxnrates](#) = 'n'

- CHARACTER(LEN=\*), parameter, public `tagdbl` = 'n'
- LOGICAL, parameter `REQ_MCFCT` = .FALSE.
- INTEGER, parameter, public `APN` = 1
- INTEGER, dimension(apn), public `ind_O2_a` = 0
- INTEGER, dimension(apn), public `ind_O3_a` = 0
- INTEGER, dimension(apn), public `ind_OH_a` = 0
- INTEGER, dimension(apn), public `ind_HO2_a` = 0
- INTEGER, dimension(apn), public `ind_H2O_a` = 0
- INTEGER, dimension(apn), public `ind_H2O2_a` = 0
- INTEGER, dimension(apn), public `ind_NH3_a` = 0
- INTEGER, dimension(apn), public `ind_NO_a` = 0
- INTEGER, dimension(apn), public `ind_NO2_a` = 0
- INTEGER, dimension(apn), public `ind_NO3_a` = 0
- INTEGER, dimension(apn), public `ind_HONO_a` = 0
- INTEGER, dimension(apn), public `ind_HNO3_a` = 0
- INTEGER, dimension(apn), public `ind_HNO4_a` = 0
- INTEGER, dimension(apn), public `ind_N2O5_a` = 0
- INTEGER, dimension(apn), public `ind_CH3OH_a` = 0
- INTEGER, dimension(apn), public `ind_HCOOH_a` = 0
- INTEGER, dimension(apn), public `ind_HCHO_a` = 0
- INTEGER, dimension(apn), public `ind_CH3O2_a` = 0
- INTEGER, dimension(apn), public `ind_CH3OOH_a` = 0
- INTEGER, dimension(apn), public `ind_CO2_a` = 0
- INTEGER, dimension(apn), public `ind_CH3CO2H_a` = 0
- INTEGER, dimension(apn), public `ind_PAN_a` = 0
- INTEGER, dimension(apn), public `ind_C2H5O2_a` = 0
- INTEGER, dimension(apn), public `ind_CH3CHO_a` = 0
- INTEGER, dimension(apn), public `ind_CH3COCH3_a` = 0
- INTEGER, dimension(apn), public `ind_Cl_a` = 0
- INTEGER, dimension(apn), public `ind_Cl2_a` = 0
- INTEGER, dimension(apn), public `ind_HCl_a` = 0
- INTEGER, dimension(apn), public `ind_HOCl_a` = 0
- INTEGER, dimension(apn), public `ind_Br_a` = 0
- INTEGER, dimension(apn), public `ind_Br2_a` = 0
- INTEGER, dimension(apn), public `ind_HBr_a` = 0
- INTEGER, dimension(apn), public `ind_HOBr_a` = 0
- INTEGER, dimension(apn), public `ind_BrCl_a` = 0
- INTEGER, dimension(apn), public `ind_I2_a` = 0
- INTEGER, dimension(apn), public `ind_IO_a` = 0
- INTEGER, dimension(apn), public `ind_HI_a` = 0
- INTEGER, dimension(apn), public `ind_HOI_a` = 0
- INTEGER, dimension(apn), public `ind_ICl_a` = 0
- INTEGER, dimension(apn), public `ind_IBr_a` = 0
- INTEGER, dimension(apn), public `ind_HIO3_a` = 0
- INTEGER, dimension(apn), public `ind_SO2_a` = 0
- INTEGER, dimension(apn), public `ind_H2SO4_a` = 0

- INTEGER, dimension(apn), public [ind\\_DMS\\_a](#) = 0
- INTEGER, dimension(apn), public [ind\\_DMSO\\_a](#) = 0
- INTEGER, dimension(apn), public [ind\\_Hg\\_a](#) = 0
- INTEGER, dimension(apn), public [ind\\_HgO\\_a](#) = 0
- INTEGER, dimension(apn), public [ind\\_HgOH\\_a](#) = 0
- INTEGER, dimension(apn), public [ind\\_HgOHOH\\_a](#) = 0
- INTEGER, dimension(apn), public [ind\\_HgOHCl\\_a](#) = 0
- INTEGER, dimension(apn), public [ind\\_HgCl2\\_a](#) = 0
- INTEGER, dimension(apn), public [ind\\_HgBr2\\_a](#) = 0
- INTEGER, dimension(apn), public [ind\\_HgSO3\\_a](#) = 0
- INTEGER, dimension(apn), public [ind\\_ClHgBr\\_a](#) = 0
- INTEGER, dimension(apn), public [ind\\_BrHgOBr\\_a](#) = 0
- INTEGER, dimension(apn), public [ind\\_ClHgOBr\\_a](#) = 0
- INTEGER, dimension(apn), public [ind\\_O2m\\_a](#) = 0
- INTEGER, dimension(apn), public [ind\\_OHm\\_a](#) = 0
- INTEGER, dimension(apn), public [ind\\_Hp\\_a](#) = 0
- INTEGER, dimension(apn), public [ind\\_NH4p\\_a](#) = 0
- INTEGER, dimension(apn), public [ind\\_NO2m\\_a](#) = 0
- INTEGER, dimension(apn), public [ind\\_NO3m\\_a](#) = 0
- INTEGER, dimension(apn), public [ind\\_NO4m\\_a](#) = 0
- INTEGER, dimension(apn), public [ind\\_CO3m\\_a](#) = 0
- INTEGER, dimension(apn), public [ind\\_HCOOm\\_a](#) = 0
- INTEGER, dimension(apn), public [ind\\_HCO3m\\_a](#) = 0
- INTEGER, dimension(apn), public [ind\\_CH3COOm\\_a](#) = 0
- INTEGER, dimension(apn), public [ind\\_Clm\\_a](#) = 0
- INTEGER, dimension(apn), public [ind\\_Cl2m\\_a](#) = 0
- INTEGER, dimension(apn), public [ind\\_ClOm\\_a](#) = 0
- INTEGER, dimension(apn), public [ind\\_ClOHm\\_a](#) = 0
- INTEGER, dimension(apn), public [ind\\_Brm\\_a](#) = 0
- INTEGER, dimension(apn), public [ind\\_Br2m\\_a](#) = 0
- INTEGER, dimension(apn), public [ind\\_BrOm\\_a](#) = 0
- INTEGER, dimension(apn), public [ind\\_BrOHm\\_a](#) = 0
- INTEGER, dimension(apn), public [ind\\_BrCl2m\\_a](#) = 0
- INTEGER, dimension(apn), public [ind\\_Br2Clm\\_a](#) = 0
- INTEGER, dimension(apn), public [ind\\_Im\\_a](#) = 0
- INTEGER, dimension(apn), public [ind\\_IO2m\\_a](#) = 0
- INTEGER, dimension(apn), public [ind\\_IO3m\\_a](#) = 0
- INTEGER, dimension(apn), public [ind\\_ICl2m\\_a](#) = 0
- INTEGER, dimension(apn), public [ind\\_IClBrm\\_a](#) = 0
- INTEGER, dimension(apn), public [ind\\_IBr2m\\_a](#) = 0
- INTEGER, dimension(apn), public [ind\\_SO3m\\_a](#) = 0
- INTEGER, dimension(apn), public [ind\\_SO3mm\\_a](#) = 0
- INTEGER, dimension(apn), public [ind\\_SO4m\\_a](#) = 0
- INTEGER, dimension(apn), public [ind\\_SO4mm\\_a](#) = 0
- INTEGER, dimension(apn), public [ind\\_SO5m\\_a](#) = 0
- INTEGER, dimension(apn), public [ind\\_HSO3m\\_a](#) = 0

- INTEGER, dimension(apn), public [ind\\_HSO4m\\_a](#) = 0
- INTEGER, dimension(apn), public [ind\\_HSO5m\\_a](#) = 0
- INTEGER, dimension(apn), public [ind\\_CH3SO3m\\_a](#) = 0
- INTEGER, dimension(apn), public [ind\\_CH2OHSO3m\\_a](#) = 0
- INTEGER, dimension(apn), public [ind\\_Hgp\\_a](#) = 0
- INTEGER, dimension(apn), public [ind\\_Hgpp\\_a](#) = 0
- INTEGER, dimension(apn), public [ind\\_HgOHp\\_a](#) = 0
- INTEGER, dimension(apn), public [ind\\_HgClp\\_a](#) = 0
- INTEGER, dimension(apn), public [ind\\_HgCl3m\\_a](#) = 0
- INTEGER, dimension(apn), public [ind\\_HgCl4mm\\_a](#) = 0
- INTEGER, dimension(apn), public [ind\\_HgBrp\\_a](#) = 0
- INTEGER, dimension(apn), public [ind\\_HgBr3m\\_a](#) = 0
- INTEGER, dimension(apn), public [ind\\_HgBr4mm\\_a](#) = 0
- INTEGER, dimension(apn), public [ind\\_HgSO32mm\\_a](#) = 0
- INTEGER, dimension(apn), public [ind\\_D1O\\_a](#) = 0
- INTEGER, dimension(apn), public [ind\\_D2O\\_a](#) = 0
- INTEGER, dimension(apn), public [ind\\_DAHp\\_a](#) = 0
- INTEGER, dimension(apn), public [ind\\_DA\\_a](#) = 0
- INTEGER, dimension(apn), public [ind\\_DAm\\_a](#) = 0
- INTEGER, dimension(apn), public [ind\\_DGtAi\\_a](#) = 0
- INTEGER, dimension(apn), public [ind\\_DGtAs\\_a](#) = 0
- INTEGER, dimension(apn), public [ind\\_PROD1\\_a](#) = 0
- INTEGER, dimension(apn), public [ind\\_PROD2\\_a](#) = 0
- INTEGER, dimension(apn), public [ind\\_Nap\\_a](#) = 0
- REAL [k\\_HO2\\_HO2](#)
- REAL [k\\_NO3\\_NO2](#)
- REAL [k\\_NO2\\_HO2](#)
- REAL [k\\_HNO3\\_OH](#)
- REAL [k\\_CH3O2](#)
- REAL [k\\_CH3OOH\\_OH](#)
- REAL [k\\_CH3CO3\\_NO2](#)
- REAL [k\\_PAN\\_M](#)
- REAL [k\\_CIO\\_CIO](#)
- REAL [k\\_BrO\\_NO2](#)
- REAL [k\\_I\\_NO2](#)
- REAL [k\\_DMS\\_OH](#)
- REAL [G7402a\\_yield](#)
- REAL [beta\\_null\\_CH3NO3](#)
- REAL [beta\\_inf\\_CH3NO3](#)
- REAL [beta\\_CH3NO3](#)
- REAL [k\\_NO2\\_CH3O2](#)
- REAL [k\\_G4138](#)
- REAL [k\\_G9408](#)
- REAL [KRO2NO](#)
- REAL [KRO2HO2](#)
- REAL [KAPHO2](#)

- REAL KAPNO
- REAL KRO2NO3
- REAL KNO3AL
- REAL J\_IC3H7NO3
- REAL J\_ACETOL
- REAL(dp) RO2
- REAL k\_O3s
- REAL k\_PrO2\_HO2
- REAL k\_PrO2\_NO
- REAL k\_PrO2\_CH3O2
- REAL k0\_NO\_HO2
- REAL k1d\_NO\_HO2
- REAL k1w\_NO\_HO2
- REAL k2d\_NO\_HO2
- REAL k2w\_NO\_HO2
- REAL alpha\_NO\_HO2
- REAL beta\_NO\_HO2
- REAL(kind=dp), parameter k\_s = 8.42E-13
- REAL(kind=dp), parameter k\_t = 1.75E-12
- REAL(kind=dp), parameter k\_p = 1.24E-13
- REAL(kind=dp), parameter k\_rohro = 1.6E-13
- REAL(kind=dp), parameter f\_soh = 3.44
- REAL(kind=dp), parameter f\_toh = 2.68
- REAL(kind=dp), parameter f\_sooH = 7.
- REAL(kind=dp), parameter f\_tooh = 7.
- REAL(kind=dp), parameter f\_ono2 = 0.04
- REAL(kind=dp), parameter f\_ch2ono2 = 0.2
- REAL(kind=dp), parameter f\_cpan = .25
- REAL(kind=dp), parameter f\_allyl = 3.6
- REAL(kind=dp), parameter f\_alk = 1.23
- REAL(kind=dp), parameter f\_cho = 0.55
- REAL(kind=dp), parameter f\_co2h = 1.67
- REAL(kind=dp), parameter f\_co = 0.73
- REAL(kind=dp), parameter f\_o = 8.15
- REAL(kind=dp), parameter f\_pch2oh = 1.29
- REAL(kind=dp), parameter f\_tch2oh = 0.53
- REAL(kind=dp), parameter k\_adp = 0.45E-11
- REAL(kind=dp), parameter k\_ads = 3.0E-11
- REAL(kind=dp), parameter k\_adt = 5.5E-11
- REAL(kind=dp), parameter k\_adsecprim = 3.0E-11
- REAL(kind=dp), parameter k\_adtertprim = 5.7E-11
- REAL(kind=dp), parameter a\_pan = 0.56
- REAL(kind=dp), parameter a\_cho = 0.31
- REAL(kind=dp), parameter a\_coch3 = 0.76
- REAL(kind=dp), parameter a\_ch2ono2 = 0.47
- REAL(kind=dp), parameter a\_ch2oh = 1.7

- REAL(kind=dp), parameter [a\\_ch2ooh](#) = 0.21
- REAL(kind=dp), parameter [a\\_coh](#) = 2.2
- REAL(kind=dp), parameter [a\\_cooH](#) = 2.2
- REAL(kind=dp), parameter [a\\_co2h](#) = 0.25
- REAL(dp), parameter [RCO3\\_OH](#) = 0.69
- REAL(dp), parameter [RCO3\\_O3](#) = 0.10
- REAL(dp), parameter [RCO3\\_OOH](#) = 0.21
- REAL(dp) [cair](#)
- REAL(dp) [press](#)
- REAL(dp) [temp\\_ion](#)
- REAL(dp) [temp\\_elec](#)
- REAL(dp), dimension(apn) [xaer](#)
- REAL(dp), dimension(apn) [cvfac](#)
- REAL(dp), dimension(apn) [lwc](#)
- REAL(dp), dimension(apn, nspec) [k\\_exf](#) = 0.
- REAL(dp), dimension(apn, nspec) [k\\_exb](#) = 0.
- REAL(dp) [k\\_exf\\_N2O5](#) = 0.
- REAL(dp) [k\\_exf\\_CINO3](#) = 0.
- REAL(dp) [k\\_exf\\_BrNO3](#) = 0.
- INTEGER, public [xnom7sulf](#) = 1
- REAL(dp), dimension(ip\_max) [jx](#) = 0.
- INTEGER, parameter, public [iht\\_N2O5](#) = 1
- INTEGER, parameter, public [iht\\_HNO3](#) = 2
- INTEGER, parameter, public [iht\\_Hg](#) = 3
- INTEGER, parameter, public [iht\\_RGM](#) = 4
- INTEGER, parameter, public [IHT\\_MAX](#) = 4
- REAL(dp) [khet\\_Tr](#) = 0.
- INTEGER, parameter [ihs\\_N2O5\\_H2O](#) = 1
- INTEGER, parameter [ihs\\_HOCl\\_HCl](#) = 2
- INTEGER, parameter [ihs\\_CINO3\\_HCl](#) = 3
- INTEGER, parameter [ihs\\_CINO3\\_H2O](#) = 4
- INTEGER, parameter [ihs\\_N2O5\\_HCl](#) = 5
- INTEGER, parameter [ihs\\_CINO3\\_HBr](#) = 6
- INTEGER, parameter [ihs\\_BrNO3\\_HCl](#) = 7
- INTEGER, parameter [ihs\\_HOCl\\_HBr](#) = 8
- INTEGER, parameter [ihs\\_HOBr\\_HCl](#) = 9
- INTEGER, parameter [ihs\\_HOBr\\_HBr](#) = 10
- INTEGER, parameter [ihs\\_BrNO3\\_H2O](#) = 11
- INTEGER, parameter [ihs\\_Hg](#) = 12
- INTEGER, parameter [ihs\\_RGM](#) = 13
- INTEGER, parameter, public [IHS\\_MAX](#) = 13
- REAL(dp) [khet\\_St](#) = 0.
- REAL(dp), parameter [testfac\\_HO2](#) = 1.e5\_dp
- REAL(dp), parameter [testfac\\_HONO](#) = 1.e5\_dp
- REAL(dp), parameter [testfac\\_HNO3](#) = 1.e7\_dp
- REAL(dp), parameter [testfac\\_HNO4](#) = 1.e5\_dp



- REAL(dp), parameter `testfac_HCOOH` = 1.e5\_dp
- REAL(dp), parameter `testfac_SO2` = 1.e9\_dp
- REAL(dp), parameter `testfac_HSO3m` = 1.e9\_dp
- REAL(dp), parameter `testfac_HSO4m` = 1.e7\_dp
- REAL(dp), parameter `testfac_NH3` = 1.e7\_dp
- REAL(dp), parameter `testfac_H2O` = 1.e9\_dp
- REAL(dp), parameter `testfac_CO2` = 1.e5\_dp
- REAL(dp), parameter `testfac_HCl` = 1.e2\_dp
- REAL(dp), parameter `testfac_HBr` = 1.e6\_dp
- REAL(dp), parameter `testfac_HOCl` = 1.e2\_dp
- REAL(dp), parameter `testfac_HOBr` = 1.e2\_dp
- REAL(dp), parameter `testfac_ICl` = 1.e2\_dp
- REAL(dp), parameter `testfac_IBr` = 1.e2\_dp
- REAL(dp), parameter `testfac_ICIBr` = 1.e2\_dp
- REAL(dp), parameter `testfac_H2SO4` = 1.e7\_dp
- LOGICAL, parameter `REQ_HET` = .FALSE.
- LOGICAL, parameter `REQ_PHOTRAT` = .TRUE.
- LOGICAL, parameter `REQ_AEROSOL` = .FALSE.
- INTEGER, parameter, public `MAX_MCEXP` = 1
- REAL, dimension(max\_mcexp) `mcexp`
- CHARACTER(LEN=\*), parameter, public `mecca_spc_file` = '-rw-r--r-- 1 sander sander 44126 Jun 20 14:09 mecca.spc'
- CHARACTER(LEN=\*), parameter, public `mecca_eqn_file` = '-rw----- 1 sander sander 42671 Jun 20 14:09 mecca.eqn'
- CHARACTER(LEN=\*), parameter, public `mecca_spc_file_sum` = '20767 44'
- CHARACTER(LEN=\*), parameter, public `mecca_eqn_file_sum` = '55078 42'
- CHARACTER(LEN=\*), parameter, public `kppoption` = 'k'
- CHARACTER(LEN=\*), parameter, public `KPP_HOME` = '/home/sander/e2/messy-\_d2.50s\_rs/messy/tools/kpp'
- CHARACTER(LEN=\*), parameter, public `KPP_version` = '2.2.1\_rs5'
- CHARACTER(LEN=\*), parameter, public `integr` = 'rosenbrock\_posdef'

### 5.42.1 Member Data Documentation

5.42.1.1 REAL(kind=dp), parameter `messy_mecca_kpp_Global::a_ch2oh` = 1.7

5.42.1.2 REAL(kind=dp), parameter `messy_mecca_kpp_Global::a_ch2ono2` = 0.47

5.42.1.3 REAL(kind=dp), parameter `messy_mecca_kpp_Global::a_ch2ooh` = 0.21

5.42.1.4 REAL(kind=dp), parameter `messy_mecca_kpp_Global::a_cho` = 0.31

5.42.1.5 REAL(kind=dp), parameter `messy_mecca_kpp_Global::a_co2h` = 0.25

5.42.1.6 REAL(kind=dp), parameter `messy_mecca_kpp_Global::a_coch3` = 0.76

- 5.42.1.7 REAL(kind=dp), parameter messy\_mecca\_kpp\_Global::a\_coh = 2.2
- 5.42.1.8 REAL(kind=dp), parameter messy\_mecca\_kpp\_Global::a\_cooH = 2.2
- 5.42.1.9 REAL(kind=dp), parameter messy\_mecca\_kpp\_Global::a\_pan = 0.56
- 5.42.1.10 REAL messy\_mecca\_kpp\_Global::alpha\_NO\_HO2
- 5.42.1.11 INTEGER, parameter, public messy\_mecca\_kpp\_Global::APN = 1
- 5.42.1.12 CHARACTER(LEN=\*), parameter, public messy\_mecca\_kpp\_Global::aqueous\_eqn\_file = 'rw----- 1 sander sander 58889 Mar 26 16:22 aqueous.eqn'
- 5.42.1.13 CHARACTER(LEN=\*), parameter, public messy\_mecca\_kpp\_Global::aqueous\_eqn\_file\_sum = '42695 58'
- 5.42.1.14 CHARACTER(LEN=\*), parameter, public messy\_mecca\_kpp\_Global::aqueous\_spc\_file = 'rw----- 1 sander sander 8444 Apr 19 2010 aqueous.spc'
- 5.42.1.15 CHARACTER(LEN=\*), parameter, public messy\_mecca\_kpp\_Global::aqueous\_spc\_file\_sum = '54945 9'
- 5.42.1.16 REAL(kind=dp) messy\_mecca\_kpp\_Global::ATOL
- 5.42.1.17 CHARACTER(LEN=\*), parameter, public messy\_mecca\_kpp\_Global::batchfile = 'simple'
- 5.42.1.18 REAL messy\_mecca\_kpp\_Global::beta\_CH3NO3
- 5.42.1.19 REAL messy\_mecca\_kpp\_Global::beta\_inf\_CH3NO3
- 5.42.1.20 REAL messy\_mecca\_kpp\_Global::beta\_NO\_HO2
- 5.42.1.21 REAL messy\_mecca\_kpp\_Global::beta\_null\_CH3NO3
- 5.42.1.22 REAL(kind=dp) messy\_mecca\_kpp\_Global::C
- 5.42.1.23 REAL(dp) messy\_mecca\_kpp\_Global::cair
- 5.42.1.24 REAL(kind=dp) messy\_mecca\_kpp\_Global::CFACITOR
- 5.42.1.25 REAL(dp), dimension(apn) messy\_mecca\_kpp\_Global::cvfac
- 5.42.1.26 CHARACTER(LEN=\*), parameter, public messy\_mecca\_kpp\_Global::diagtracfile = ''

- 5.42.1.27 REAL(kind=dp) messy\_mecca\_kpp\_Global::DT
- 5.42.1.28 REAL(kind=dp), parameter messy\_mecca\_kpp\_Global::f\_alk = 1.23
- 5.42.1.29 REAL(kind=dp), parameter messy\_mecca\_kpp\_Global::f\_allyl = 3.6
- 5.42.1.30 REAL(kind=dp), parameter messy\_mecca\_kpp\_Global::f\_ch2ono2 = 0.2
- 5.42.1.31 REAL(kind=dp), parameter messy\_mecca\_kpp\_Global::f\_cho = 0.55
- 5.42.1.32 REAL(kind=dp), parameter messy\_mecca\_kpp\_Global::f\_co = 0.73
- 5.42.1.33 REAL(kind=dp), parameter messy\_mecca\_kpp\_Global::f\_co2h = 1.67
- 5.42.1.34 REAL(kind=dp), parameter messy\_mecca\_kpp\_Global::f\_cpan = .25
- 5.42.1.35 REAL(kind=dp), parameter messy\_mecca\_kpp\_Global::f\_o = 8.15
- 5.42.1.36 REAL(kind=dp), parameter messy\_mecca\_kpp\_Global::f\_ono2 = 0.04
- 5.42.1.37 REAL(kind=dp), parameter messy\_mecca\_kpp\_Global::f\_pch2oh = 1.29
- 5.42.1.38 REAL(kind=dp), parameter messy\_mecca\_kpp\_Global::f\_soh = 3.44
- 5.42.1.39 REAL(kind=dp), parameter messy\_mecca\_kpp\_Global::f\_sohh = 7.
- 5.42.1.40 REAL(kind=dp), parameter messy\_mecca\_kpp\_Global::f\_tch2oh = 0.53
- 5.42.1.41 REAL(kind=dp), parameter messy\_mecca\_kpp\_Global::f\_toh = 2.68
- 5.42.1.42 REAL(kind=dp), parameter messy\_mecca\_kpp\_Global::f\_tooh = 7.
- 5.42.1.43 REAL(kind=dp) messy\_mecca\_kpp\_Global::FIX
- 5.42.1.44 REAL messy\_mecca\_kpp\_Global::G7402a\_yield
- 5.42.1.45 CHARACTER(LEN=\*), parameter, public messy\_mecca\_kpp\_Global::gas\_eqn\_file = '-rw-r--r-- 1 sander sander 150920 Mar 23 16:46 gas.eqn'
- 5.42.1.46 CHARACTER(LEN=\*), parameter, public messy\_mecca\_kpp\_Global::gas\_eqn\_file\_sum = '61164 148'
- 5.42.1.47 CHARACTER(LEN=\*), parameter, public messy\_mecca\_kpp\_Global::gas\_spc\_file = '-rw----- 1 sander sander 35285 Nov 7 2014 gas.spc'

- 5.42.1.48 CHARACTER(LEN=\*), parameter, public messy\_mecca\_kpp\_Global::gas\_spc-\_file\_sum = '14323 35'
- 5.42.1.49 INTEGER, parameter messy\_mecca\_kpp\_Global::ihs\_BrNO3\_H2O = 11
- 5.42.1.50 INTEGER, parameter messy\_mecca\_kpp\_Global::ihs\_BrNO3\_HCl = 7
- 5.42.1.51 INTEGER, parameter messy\_mecca\_kpp\_Global::ihs\_CINO3\_H2O = 4
- 5.42.1.52 INTEGER, parameter messy\_mecca\_kpp\_Global::ihs\_CINO3\_HBr = 6
- 5.42.1.53 INTEGER, parameter messy\_mecca\_kpp\_Global::ihs\_CINO3\_HCl = 3
- 5.42.1.54 INTEGER, parameter messy\_mecca\_kpp\_Global::ihs\_Hg = 12
- 5.42.1.55 INTEGER, parameter messy\_mecca\_kpp\_Global::ihs\_HOBr\_HBr = 10
- 5.42.1.56 INTEGER, parameter messy\_mecca\_kpp\_Global::ihs\_HOBr\_HCl = 9
- 5.42.1.57 INTEGER, parameter messy\_mecca\_kpp\_Global::ihs\_HOCl\_HBr = 8
- 5.42.1.58 INTEGER, parameter messy\_mecca\_kpp\_Global::ihs\_HOCl\_HCl = 2
- 5.42.1.59 INTEGER, parameter, public messy\_mecca\_kpp\_Global::IHS\_MAX = 13
- 5.42.1.60 INTEGER, parameter messy\_mecca\_kpp\_Global::ihs\_N2O5\_H2O = 1
- 5.42.1.61 INTEGER, parameter messy\_mecca\_kpp\_Global::ihs\_N2O5\_HCl = 5
- 5.42.1.62 INTEGER, parameter messy\_mecca\_kpp\_Global::ihs\_RGM = 13
- 5.42.1.63 INTEGER, parameter, public messy\_mecca\_kpp\_Global::iht\_Hg = 3
- 5.42.1.64 INTEGER, parameter, public messy\_mecca\_kpp\_Global::iht\_HNO3 = 2
- 5.42.1.65 INTEGER, parameter, public messy\_mecca\_kpp\_Global::IHT\_MAX = 4
- 5.42.1.66 INTEGER, parameter, public messy\_mecca\_kpp\_Global::iht\_N2O5 = 1
- 5.42.1.67 INTEGER, parameter, public messy\_mecca\_kpp\_Global::iht\_RGM = 4
- 5.42.1.68 INTEGER, dimension(apn), public messy\_mecca\_kpp\_Global::ind\_Br2\_a = 0
- 5.42.1.69 INTEGER, dimension(apn), public messy\_mecca\_kpp\_Global::ind\_Br2Clm\_a = 0
- 5.42.1.70 INTEGER, dimension(apn), public messy\_mecca\_kpp\_Global::ind\_Br2m\_a = 0

- 5.42.1.71 INTEGER, dimension(apn), public messy\_mecca\_kpp\_Global::ind\_Br\_a = 0
- 5.42.1.72 INTEGER, dimension(apn), public messy\_mecca\_kpp\_Global::ind\_BrCl2m\_a = 0
- 5.42.1.73 INTEGER, dimension(apn), public messy\_mecca\_kpp\_Global::ind\_BrCl\_a = 0
- 5.42.1.74 INTEGER, dimension(apn), public messy\_mecca\_kpp\_Global::ind\_BrHgOBr\_a = 0
- 5.42.1.75 INTEGER, dimension(apn), public messy\_mecca\_kpp\_Global::ind\_Brm\_a = 0
- 5.42.1.76 INTEGER, dimension(apn), public messy\_mecca\_kpp\_Global::ind\_BrOHm\_a = 0
- 5.42.1.77 INTEGER, dimension(apn), public messy\_mecca\_kpp\_Global::ind\_BrOm\_a = 0
- 5.42.1.78 INTEGER, dimension(apn), public messy\_mecca\_kpp\_Global::ind\_C2H5O2\_a = 0
- 5.42.1.79 INTEGER, dimension(apn), public messy\_mecca\_kpp\_Global::ind\_CH2OHS-O3m\_a = 0
- 5.42.1.80 INTEGER, dimension(apn), public messy\_mecca\_kpp\_Global::ind\_CH3CHO\_a = 0
- 5.42.1.81 INTEGER, dimension(apn), public messy\_mecca\_kpp\_Global::ind\_CH3CO2H\_a = 0
- 5.42.1.82 INTEGER, dimension(apn), public messy\_mecca\_kpp\_Global::ind\_CH3COC-H3\_a = 0
- 5.42.1.83 INTEGER, dimension(apn), public messy\_mecca\_kpp\_Global::ind\_CH3CO-Om\_a = 0
- 5.42.1.84 INTEGER, dimension(apn), public messy\_mecca\_kpp\_Global::ind\_CH3O2\_a = 0
- 5.42.1.85 INTEGER, dimension(apn), public messy\_mecca\_kpp\_Global::ind\_CH3OH\_a = 0
- 5.42.1.86 INTEGER, dimension(apn), public messy\_mecca\_kpp\_Global::ind\_CH3OOH\_a = 0
- 5.42.1.87 INTEGER, dimension(apn), public messy\_mecca\_kpp\_Global::ind\_CH3S-O3m\_a = 0

- 5.42.1.88 INTEGER, dimension(apn), public messy\_mecca\_kpp\_Global::ind\_Cl2\_a = 0
- 5.42.1.89 INTEGER, dimension(apn), public messy\_mecca\_kpp\_Global::ind\_Cl2m\_a = 0
- 5.42.1.90 INTEGER, dimension(apn), public messy\_mecca\_kpp\_Global::ind\_Cl\_a = 0
- 5.42.1.91 INTEGER, dimension(apn), public messy\_mecca\_kpp\_Global::ind\_ClHgBr\_a = 0
- 5.42.1.92 INTEGER, dimension(apn), public messy\_mecca\_kpp\_Global::ind\_ClHgOBr\_a = 0
- 5.42.1.93 INTEGER, dimension(apn), public messy\_mecca\_kpp\_Global::ind\_Clm\_a = 0
- 5.42.1.94 INTEGER, dimension(apn), public messy\_mecca\_kpp\_Global::ind\_ClOHm\_a = 0
- 5.42.1.95 INTEGER, dimension(apn), public messy\_mecca\_kpp\_Global::ind\_ClOm\_a = 0
- 5.42.1.96 INTEGER, dimension(apn), public messy\_mecca\_kpp\_Global::ind\_CO2\_a = 0
- 5.42.1.97 INTEGER, dimension(apn), public messy\_mecca\_kpp\_Global::ind\_CO3m\_a = 0
- 5.42.1.98 INTEGER, dimension(apn), public messy\_mecca\_kpp\_Global::ind\_D1O\_a = 0
- 5.42.1.99 INTEGER, dimension(apn), public messy\_mecca\_kpp\_Global::ind\_D2O\_a = 0
- 5.42.1.100 INTEGER, dimension(apn), public messy\_mecca\_kpp\_Global::ind\_DA\_a = 0
- 5.42.1.101 INTEGER, dimension(apn), public messy\_mecca\_kpp\_Global::ind\_DAHp\_a = 0
- 5.42.1.102 INTEGER, dimension(apn), public messy\_mecca\_kpp\_Global::ind\_DAm\_a = 0
- 5.42.1.103 INTEGER, dimension(apn), public messy\_mecca\_kpp\_Global::ind\_DGtAi\_a = 0
- 5.42.1.104 INTEGER, dimension(apn), public messy\_mecca\_kpp\_Global::ind\_DGtAs\_a = 0
- 5.42.1.105 INTEGER, dimension(apn), public messy\_mecca\_kpp\_Global::ind\_DMS\_a = 0
- 5.42.1.106 INTEGER, dimension(apn), public messy\_mecca\_kpp\_Global::ind\_DMSO\_a = 0

- 5.42.1.107 INTEGER, dimension(apn), public messy\_mecca\_kpp\_Global::ind\_H2O2\_a = 0
- 5.42.1.108 INTEGER, dimension(apn), public messy\_mecca\_kpp\_Global::ind\_H2O\_a = 0
- 5.42.1.109 INTEGER, dimension(apn), public messy\_mecca\_kpp\_Global::ind\_H2SO4\_a = 0
- 5.42.1.110 INTEGER, dimension(apn), public messy\_mecca\_kpp\_Global::ind\_HBr\_a = 0
- 5.42.1.111 INTEGER, dimension(apn), public messy\_mecca\_kpp\_Global::ind\_HCHO\_a = 0
- 5.42.1.112 INTEGER, dimension(apn), public messy\_mecca\_kpp\_Global::ind\_HCl\_a = 0
- 5.42.1.113 INTEGER, dimension(apn), public messy\_mecca\_kpp\_Global::ind\_HCO3m\_a = 0
- 5.42.1.114 INTEGER, dimension(apn), public messy\_mecca\_kpp\_Global::ind\_HCOOH\_a = 0
- 5.42.1.115 INTEGER, dimension(apn), public messy\_mecca\_kpp\_Global::ind\_HCOOm\_a = 0
- 5.42.1.116 INTEGER, dimension(apn), public messy\_mecca\_kpp\_Global::ind\_Hg\_a = 0
- 5.42.1.117 INTEGER, dimension(apn), public messy\_mecca\_kpp\_Global::ind\_HgBr2\_a = 0
- 5.42.1.118 INTEGER, dimension(apn), public messy\_mecca\_kpp\_Global::ind\_HgBr3m\_a = 0
- 5.42.1.119 INTEGER, dimension(apn), public messy\_mecca\_kpp\_Global::ind\_HgBr4mm\_a = 0
- 5.42.1.120 INTEGER, dimension(apn), public messy\_mecca\_kpp\_Global::ind\_HgBrp\_a = 0
- 5.42.1.121 INTEGER, dimension(apn), public messy\_mecca\_kpp\_Global::ind\_HgCl2\_a = 0
- 5.42.1.122 INTEGER, dimension(apn), public messy\_mecca\_kpp\_Global::ind\_HgCl3m\_a = 0
- 5.42.1.123 INTEGER, dimension(apn), public messy\_mecca\_kpp\_Global::ind\_HgCl4mm\_a = 0

- 5.42.1.124 INTEGER, dimension(apn), public messy\_mecca\_kpp\_Global::ind\_HgClp\_a = 0
- 5.42.1.125 INTEGER, dimension(apn), public messy\_mecca\_kpp\_Global::ind\_HgO\_a = 0
- 5.42.1.126 INTEGER, dimension(apn), public messy\_mecca\_kpp\_Global::ind\_HgOH\_a = 0
- 5.42.1.127 INTEGER, dimension(apn), public messy\_mecca\_kpp\_Global::ind\_HgOHCl-\_a = 0
- 5.42.1.128 INTEGER, dimension(apn), public messy\_mecca\_kpp\_Global::ind\_HgOHOH-\_a = 0
- 5.42.1.129 INTEGER, dimension(apn), public messy\_mecca\_kpp\_Global::ind\_HgOHp\_a = 0
- 5.42.1.130 INTEGER, dimension(apn), public messy\_mecca\_kpp\_Global::ind\_Hgp\_a = 0
- 5.42.1.131 INTEGER, dimension(apn), public messy\_mecca\_kpp\_Global::ind\_Hgpp\_a = 0
- 5.42.1.132 INTEGER, dimension(apn), public messy\_mecca\_kpp\_Global::ind\_HgS-O32mm\_a = 0
- 5.42.1.133 INTEGER, dimension(apn), public messy\_mecca\_kpp\_Global::ind\_HgSO3\_a = 0
- 5.42.1.134 INTEGER, dimension(apn), public messy\_mecca\_kpp\_Global::ind\_HI\_a = 0
- 5.42.1.135 INTEGER, dimension(apn), public messy\_mecca\_kpp\_Global::ind\_HIO3\_a = 0
- 5.42.1.136 INTEGER, dimension(apn), public messy\_mecca\_kpp\_Global::ind\_HNO3\_a = 0
- 5.42.1.137 INTEGER, dimension(apn), public messy\_mecca\_kpp\_Global::ind\_HNO4\_a = 0
- 5.42.1.138 INTEGER, dimension(apn), public messy\_mecca\_kpp\_Global::ind\_HO2\_a = 0
- 5.42.1.139 INTEGER, dimension(apn), public messy\_mecca\_kpp\_Global::ind\_HOBr\_a = 0
- 5.42.1.140 INTEGER, dimension(apn), public messy\_mecca\_kpp\_Global::ind\_HOCl\_a = 0
- 5.42.1.141 INTEGER, dimension(apn), public messy\_mecca\_kpp\_Global::ind\_HOI\_a = 0



- 5.42.1.142 INTEGER, dimension(apn), public messy\_mecca\_kpp\_Global::ind\_HONO\_a = 0
- 5.42.1.143 INTEGER, dimension(apn), public messy\_mecca\_kpp\_Global::ind\_Hp\_a = 0
- 5.42.1.144 INTEGER, dimension(apn), public messy\_mecca\_kpp\_Global::ind\_HSO3m\_a = 0
- 5.42.1.145 INTEGER, dimension(apn), public messy\_mecca\_kpp\_Global::ind\_HSO4m\_a = 0
- 5.42.1.146 INTEGER, dimension(apn), public messy\_mecca\_kpp\_Global::ind\_HSO5m\_a = 0
- 5.42.1.147 INTEGER, dimension(apn), public messy\_mecca\_kpp\_Global::ind\_I2\_a = 0
- 5.42.1.148 INTEGER, dimension(apn), public messy\_mecca\_kpp\_Global::ind\_IBr2m\_a = 0
- 5.42.1.149 INTEGER, dimension(apn), public messy\_mecca\_kpp\_Global::ind\_IBr\_a = 0
- 5.42.1.150 INTEGER, dimension(apn), public messy\_mecca\_kpp\_Global::ind\_ICl2m\_a = 0
- 5.42.1.151 INTEGER, dimension(apn), public messy\_mecca\_kpp\_Global::ind\_ICl\_a = 0
- 5.42.1.152 INTEGER, dimension(apn), public messy\_mecca\_kpp\_Global::ind\_IClBrm\_a = 0
- 5.42.1.153 INTEGER, dimension(apn), public messy\_mecca\_kpp\_Global::ind\_Im\_a = 0
- 5.42.1.154 INTEGER, dimension(apn), public messy\_mecca\_kpp\_Global::ind\_IO2m\_a = 0
- 5.42.1.155 INTEGER, dimension(apn), public messy\_mecca\_kpp\_Global::ind\_IO3m\_a = 0
- 5.42.1.156 INTEGER, dimension(apn), public messy\_mecca\_kpp\_Global::ind\_IO\_a = 0
- 5.42.1.157 INTEGER, dimension(apn), public messy\_mecca\_kpp\_Global::ind\_N2O5\_a = 0
- 5.42.1.158 INTEGER, dimension(apn), public messy\_mecca\_kpp\_Global::ind\_Nap\_a = 0
- 5.42.1.159 INTEGER, dimension(apn), public messy\_mecca\_kpp\_Global::ind\_NH3\_a = 0
- 5.42.1.160 INTEGER, dimension(apn), public messy\_mecca\_kpp\_Global::ind\_NH4p\_a = 0

- 5.42.1.161 INTEGER, dimension(apn), public messy\_mecca\_kpp\_Global::ind\_NO2\_a = 0
- 5.42.1.162 INTEGER, dimension(apn), public messy\_mecca\_kpp\_Global::ind\_NO2m\_a = 0
- 5.42.1.163 INTEGER, dimension(apn), public messy\_mecca\_kpp\_Global::ind\_NO3\_a = 0
- 5.42.1.164 INTEGER, dimension(apn), public messy\_mecca\_kpp\_Global::ind\_NO3m\_a = 0
- 5.42.1.165 INTEGER, dimension(apn), public messy\_mecca\_kpp\_Global::ind\_NO4m\_a = 0
- 5.42.1.166 INTEGER, dimension(apn), public messy\_mecca\_kpp\_Global::ind\_NO\_a = 0
- 5.42.1.167 INTEGER, dimension(apn), public messy\_mecca\_kpp\_Global::ind\_O2\_a = 0
- 5.42.1.168 INTEGER, dimension(apn), public messy\_mecca\_kpp\_Global::ind\_O2m\_a = 0
- 5.42.1.169 INTEGER, dimension(apn), public messy\_mecca\_kpp\_Global::ind\_O3\_a = 0
- 5.42.1.170 INTEGER, dimension(apn), public messy\_mecca\_kpp\_Global::ind\_OH\_a = 0
- 5.42.1.171 INTEGER, dimension(apn), public messy\_mecca\_kpp\_Global::ind\_OHm\_a = 0
- 5.42.1.172 INTEGER, dimension(apn), public messy\_mecca\_kpp\_Global::ind\_PAN\_a = 0
- 5.42.1.173 INTEGER, dimension(apn), public messy\_mecca\_kpp\_Global::ind\_PROD1\_a = 0
- 5.42.1.174 INTEGER, dimension(apn), public messy\_mecca\_kpp\_Global::ind\_PROD2\_a = 0
- 5.42.1.175 INTEGER, dimension(apn), public messy\_mecca\_kpp\_Global::ind\_SO2\_a = 0
- 5.42.1.176 INTEGER, dimension(apn), public messy\_mecca\_kpp\_Global::ind\_SO3m\_a = 0
- 5.42.1.177 INTEGER, dimension(apn), public messy\_mecca\_kpp\_Global::ind\_SO3mm\_a = 0
- 5.42.1.178 INTEGER, dimension(apn), public messy\_mecca\_kpp\_Global::ind\_SO4m\_a = 0
- 5.42.1.179 INTEGER, dimension(apn), public messy\_mecca\_kpp\_Global::ind\_SO4mm\_a = 0

- 5.42.1.180 INTEGER, dimension(apn), public messy\_mecca\_kpp\_Global::ind\_SO5m\_a = 0
- 5.42.1.181 CHARACTER(LEN=\*), parameter, public messy\_mecca\_kpp\_Global::integr = 'rosenbrock\_posdef'
- 5.42.1.182 REAL messy\_mecca\_kpp\_Global::J\_ACETOL
- 5.42.1.183 REAL messy\_mecca\_kpp\_Global::J\_IC3H7NO3
- 5.42.1.184 REAL(dp), dimension(ip\_max) messy\_mecca\_kpp\_Global::jx = 0.
- 5.42.1.185 REAL messy\_mecca\_kpp\_Global::k0\_NO\_HO2
- 5.42.1.186 REAL messy\_mecca\_kpp\_Global::k1d\_NO\_HO2
- 5.42.1.187 REAL messy\_mecca\_kpp\_Global::k1w\_NO\_HO2
- 5.42.1.188 REAL messy\_mecca\_kpp\_Global::k2d\_NO\_HO2
- 5.42.1.189 REAL messy\_mecca\_kpp\_Global::k2w\_NO\_HO2
- 5.42.1.190 REAL(kind=dp), parameter messy\_mecca\_kpp\_Global::k\_adp = 0.45E-11
- 5.42.1.191 REAL(kind=dp), parameter messy\_mecca\_kpp\_Global::k\_ads = 3.0E-11
- 5.42.1.192 REAL(kind=dp), parameter messy\_mecca\_kpp\_Global::k\_adsecprim = 3.0E-11
- 5.42.1.193 REAL(kind=dp), parameter messy\_mecca\_kpp\_Global::k\_adt = 5.5E-11
- 5.42.1.194 REAL(kind=dp), parameter messy\_mecca\_kpp\_Global::k\_adtertprim = 5.7E-11
- 5.42.1.195 REAL messy\_mecca\_kpp\_Global::k\_BrO\_NO2
- 5.42.1.196 REAL messy\_mecca\_kpp\_Global::k\_CH3CO3\_NO2
- 5.42.1.197 REAL messy\_mecca\_kpp\_Global::k\_CH3O2
- 5.42.1.198 REAL messy\_mecca\_kpp\_Global::k\_CH3OOH\_OH
- 5.42.1.199 REAL messy\_mecca\_kpp\_Global::k\_CIO\_CIO
- 5.42.1.200 REAL messy\_mecca\_kpp\_Global::k\_DMS\_OH
- 5.42.1.201 REAL(dp), dimension(apn,nspec) messy\_mecca\_kpp\_Global::k\_exb = 0.

- 5.42.1.202 REAL(dp), dimension(apn,nspec) messy\_mecca\_kpp\_Global::k\_exf = 0.
- 5.42.1.203 REAL(dp) messy\_mecca\_kpp\_Global::k\_exf\_BrNO3 = 0.
- 5.42.1.204 REAL(dp) messy\_mecca\_kpp\_Global::k\_exf\_CINO3 = 0.
- 5.42.1.205 REAL(dp) messy\_mecca\_kpp\_Global::k\_exf\_N2O5 = 0.
- 5.42.1.206 REAL messy\_mecca\_kpp\_Global::k\_G4138
- 5.42.1.207 REAL messy\_mecca\_kpp\_Global::k\_G9408
- 5.42.1.208 REAL messy\_mecca\_kpp\_Global::k\_HNO3\_OH
- 5.42.1.209 REAL messy\_mecca\_kpp\_Global::k\_HO2\_HO2
- 5.42.1.210 REAL messy\_mecca\_kpp\_Global::k\_I\_NO2
- 5.42.1.211 REAL messy\_mecca\_kpp\_Global::k\_NO2\_CH3O2
- 5.42.1.212 REAL messy\_mecca\_kpp\_Global::k\_NO2\_HO2
- 5.42.1.213 REAL messy\_mecca\_kpp\_Global::k\_NO3\_NO2
- 5.42.1.214 REAL messy\_mecca\_kpp\_Global::k\_O3s
- 5.42.1.215 REAL(kind=dp), parameter messy\_mecca\_kpp\_Global::k\_p = 1.24E-13
- 5.42.1.216 REAL messy\_mecca\_kpp\_Global::k\_PAN\_M
- 5.42.1.217 REAL messy\_mecca\_kpp\_Global::k\_PrO2\_CH3O2
- 5.42.1.218 REAL messy\_mecca\_kpp\_Global::k\_PrO2\_HO2
- 5.42.1.219 REAL messy\_mecca\_kpp\_Global::k\_PrO2\_NO
- 5.42.1.220 REAL(kind=dp), parameter messy\_mecca\_kpp\_Global::k\_rohro = 1.6E-13
- 5.42.1.221 REAL(kind=dp), parameter messy\_mecca\_kpp\_Global::k\_s = 8.42E-13
- 5.42.1.222 REAL(kind=dp), parameter messy\_mecca\_kpp\_Global::k\_t = 1.75E-12
- 5.42.1.223 REAL messy\_mecca\_kpp\_Global::KAPHO2
- 5.42.1.224 REAL messy\_mecca\_kpp\_Global::KAPNO
- 5.42.1.225 REAL(dp) messy\_mecca\_kpp\_Global::khet\_St = 0.

- 5.42.1.226 REAL(dp) messy\_mecca\_kpp\_Global::khet\_Tr = 0.
- 5.42.1.227 REAL messy\_mecca\_kpp\_Global::KNO3AL
- 5.42.1.228 CHARACTER(LEN=\*), parameter, public messy\_mecca\_kpp\_Global::KPP\_HOME = '/home/sander/e2/messy\_d2.50s\_rs/messy/tools/kpp'
- 5.42.1.229 CHARACTER(LEN=\*), parameter, public messy\_mecca\_kpp\_Global::KPP\_version = '2.2.1\_rs5'
- 5.42.1.230 CHARACTER(LEN=\*), parameter, public messy\_mecca\_kpp\_Global::kppoption = 'k'
- 5.42.1.231 REAL messy\_mecca\_kpp\_Global::KRO2HO2
- 5.42.1.232 REAL messy\_mecca\_kpp\_Global::KRO2NO
- 5.42.1.233 REAL messy\_mecca\_kpp\_Global::KRO2NO3
- 5.42.1.234 REAL(dp), dimension(apn) messy\_mecca\_kpp\_Global::lwc
- 5.42.1.235 INTEGER, parameter, public messy\_mecca\_kpp\_Global::MAX\_MCEXP = 1
- 5.42.1.236 REAL, dimension(max\_mcexp) messy\_mecca\_kpp\_Global::mcexp
- 5.42.1.237 CHARACTER(LEN=\*), parameter, public messy\_mecca\_kpp\_Global::mecca\_eqn\_file = '-rw----- 1 sander sander 42671 Jun 20 14:09 mecca.eqn'
- 5.42.1.238 CHARACTER(LEN=\*), parameter, public messy\_mecca\_kpp\_Global::mecca\_eqn\_file\_sum = '55078 42'
- 5.42.1.239 CHARACTER(LEN=\*), parameter, public messy\_mecca\_kpp\_Global::mecca\_spc\_file = '-rw-r--r-- 1 sander sander 44126 Jun 20 14:09 mecca.spc'
- 5.42.1.240 CHARACTER(LEN=\*), parameter, public messy\_mecca\_kpp\_Global::mecca\_spc\_file\_sum = '20767 44'
- 5.42.1.241 REAL(dp) messy\_mecca\_kpp\_Global::press
- 5.42.1.242 REAL(dp), parameter messy\_mecca\_kpp\_Global::RCO3\_O3 = 0.10
- 5.42.1.243 REAL(dp), parameter messy\_mecca\_kpp\_Global::RCO3\_OH = 0.69
- 5.42.1.244 REAL(dp), parameter messy\_mecca\_kpp\_Global::RCO3\_OOH = 0.21
- 5.42.1.245 REAL(kind=dp) messy\_mecca\_kpp\_Global::RCONST

- 5.42.1.246 LOGICAL, parameter messy\_mecca\_kpp\_Global::REQ\_AEROSOL = .FALSE.
- 5.42.1.247 LOGICAL, parameter messy\_mecca\_kpp\_Global::REQ\_HET = .FALSE.
- 5.42.1.248 LOGICAL, parameter messy\_mecca\_kpp\_Global::REQ\_MCFCT = .FALSE.
- 5.42.1.249 LOGICAL, parameter messy\_mecca\_kpp\_Global::REQ\_PHOTRAT = .TRUE.
- 5.42.1.250 REAL(dp) messy\_mecca\_kpp\_Global::RO2
- 5.42.1.251 CHARACTER(LEN=\*), parameter, public messy\_mecca\_kpp\_Global::rplfile = "
- 5.42.1.252 REAL(kind=dp) messy\_mecca\_kpp\_Global::RTOL
- 5.42.1.253 CHARACTER(LEN=\*), parameter, public messy\_mecca\_kpp\_Global::rxnrates = 'n'
- 5.42.1.254 REAL(kind=dp) messy\_mecca\_kpp\_Global::STEPMAX
- 5.42.1.255 REAL(kind=dp) messy\_mecca\_kpp\_Global::STEPMIN
- 5.42.1.256 REAL(kind=dp) messy\_mecca\_kpp\_Global::SUN
- 5.42.1.257 CHARACTER(LEN=\*), parameter, public messy\_mecca\_kpp\_Global::tagdbl = 'n'
- 5.42.1.258 REAL(kind=dp) messy\_mecca\_kpp\_Global::TEMP
- 5.42.1.259 REAL(dp) messy\_mecca\_kpp\_Global::temp\_elec
- 5.42.1.260 REAL(dp) messy\_mecca\_kpp\_Global::temp\_ion
- 5.42.1.261 REAL(kind=dp) messy\_mecca\_kpp\_Global::TEND
- 5.42.1.262 REAL(dp), parameter messy\_mecca\_kpp\_Global::testfac\_CO2 = 1.e5\_dp
- 5.42.1.263 REAL(dp), parameter messy\_mecca\_kpp\_Global::testfac\_H2O = 1.e9\_dp
- 5.42.1.264 REAL(dp), parameter messy\_mecca\_kpp\_Global::testfac\_H2SO4 = 1.e7\_dp
- 5.42.1.265 REAL(dp), parameter messy\_mecca\_kpp\_Global::testfac\_HBr = 1.e6\_dp
- 5.42.1.266 REAL(dp), parameter messy\_mecca\_kpp\_Global::testfac\_HCl = 1.e2\_dp
- 5.42.1.267 REAL(dp), parameter messy\_mecca\_kpp\_Global::testfac\_HCOOH = 1.e5\_dp

- 5.42.1.268 REAL(dp), parameter messy\_mecca\_kpp\_Global::testfac\_HNO3 = 1.e7\_dp
- 5.42.1.269 REAL(dp), parameter messy\_mecca\_kpp\_Global::testfac\_HNO4 = 1.e5\_dp
- 5.42.1.270 REAL(dp), parameter messy\_mecca\_kpp\_Global::testfac\_HO2 = 1.e5\_dp
- 5.42.1.271 REAL(dp), parameter messy\_mecca\_kpp\_Global::testfac\_HOBr = 1.e2\_dp
- 5.42.1.272 REAL(dp), parameter messy\_mecca\_kpp\_Global::testfac\_HOCl = 1.e2\_dp
- 5.42.1.273 REAL(dp), parameter messy\_mecca\_kpp\_Global::testfac\_HONO = 1.e5\_dp
- 5.42.1.274 REAL(dp), parameter messy\_mecca\_kpp\_Global::testfac\_HSO3m = 1.e9\_dp
- 5.42.1.275 REAL(dp), parameter messy\_mecca\_kpp\_Global::testfac\_HSO4m = 1.e7\_dp
- 5.42.1.276 REAL(dp), parameter messy\_mecca\_kpp\_Global::testfac\_IBr = 1.e2\_dp
- 5.42.1.277 REAL(dp), parameter messy\_mecca\_kpp\_Global::testfac\_ICl = 1.e2\_dp
- 5.42.1.278 REAL(dp), parameter messy\_mecca\_kpp\_Global::testfac\_ICIBr = 1.e2\_dp
- 5.42.1.279 REAL(dp), parameter messy\_mecca\_kpp\_Global::testfac\_NH3 = 1.e7\_dp
- 5.42.1.280 REAL(dp), parameter messy\_mecca\_kpp\_Global::testfac\_SO2 = 1.e9\_dp
- 5.42.1.281 REAL(kind=dp) messy\_mecca\_kpp\_Global::TIME
- 5.42.1.282 CHARACTER(LEN=\*), parameter, public messy\_mecca\_kpp\_Global::timestamp = 'xmecca was run on 2015-06-20 at 14:09:00 by sander on machine bromine'
- 5.42.1.283 REAL(kind=dp) messy\_mecca\_kpp\_Global::TSTART
- 5.42.1.284 REAL(kind=dp) messy\_mecca\_kpp\_Global::VAR
- 5.42.1.285 CHARACTER(LEN=\*), parameter, public messy\_mecca\_kpp\_Global::wanted = 'Tr && G && !C && !S && !Cl && !Br && !I && !Hg'
- 5.42.1.286 REAL(dp), dimension(apn) messy\_mecca\_kpp\_Global::xaer
- 5.42.1.287 INTEGER, public messy\_mecca\_kpp\_Global::xnom7sulf = 1

The documentation for this module was generated from the following file:

- [/home/sander/e2/messy\\_d2.50s\\_rs/messy/mbm/caaba/messy\\_mecca\\_kpp\\_global.f90](#)

## 5.43 messy\_mecca\_kpp\_Initialize Module Reference

### Public Member Functions

- subroutine [Initialize](#) ()

### 5.43.1 Member Function/Subroutine Documentation

#### 5.43.1.1 subroutine messy\_mecca\_kpp\_Initialize::Initialize ( )

The documentation for this module was generated from the following file:

- /home/sander/e2/messy\_d2.50s\_rs/messy/mbm/caaba/[messy\\_mecca\\_kpp\\_initialize.f90](#)

## 5.44 messy\_mecca\_kpp\_Integrator Module Reference

### Public Member Functions

- subroutine [INTEGRATE](#) (TIN, TOUT, ICNTRL\_U, RCNTRL\_U, ISTATUS\_U, RSTATUS\_U, IERR\_U)
- subroutine [Rosenbrock](#) (N, Y, Tstart, Tend, AbsTol, RelTol, RCNTRL, ICNTRL, RSTATUS, ISTATUS, IERR)
- subroutine [FunTemplate](#) (T, Y, Ydot)
- subroutine [JacTemplate](#) (T, Y, Jcb)

### Public Attributes

- INTEGER, parameter [Nfun](#) = 1
- INTEGER, parameter [Njac](#) = 2
- INTEGER, parameter [Nstp](#) = 3
- INTEGER, parameter [Nacc](#) = 4
- INTEGER, parameter [Nrej](#) = 5
- INTEGER, parameter [Ndec](#) = 6
- INTEGER, parameter [Nsol](#) = 7
- INTEGER, parameter [Nsng](#) = 8
- INTEGER, parameter [Ntexit](#) = 1
- INTEGER, parameter [Nhexit](#) = 2
- INTEGER, parameter [Nhnew](#) = 3
- CHARACTER(LEN=50), dimension(-8:1), parameter [IERR\\_NAMES](#) = (/ 'Matrix is repeatedly singular ', 'Step size too small ', 'No of steps exceeds maximum bound ', 'Improper tolerance values ', 'FacMin/FacMax/FacRej must be positive ', 'Hmin/Hmax/Hstart must be positive ', 'Selected [Rosenbrock](#) method not implemented ', 'Improper value for maximal no of steps ', ' ', 'Success ' /)



## 5.44.1 Member Function/Subroutine Documentation

- 5.44.1.1 subroutine `messy_mecca_kpp_Integrator::FunTemplate` ( `REAL(kind=dp) T`, `REAL(kind=dp), dimension(nvar) Y`, `REAL(kind=dp), dimension(nvar) Ydot` )
- 5.44.1.2 subroutine `messy_mecca_kpp_Integrator::INTEGRATE` ( `REAL(kind=dp)`, `intent(in) TIN`, `REAL(kind=dp)`, `intent(in) TOUT`, `INTEGER, dimension(20)`, `intent(in)`, `optional ICNTRL_U`, `REAL(kind=dp), dimension(20)`, `intent(in)`, `optional RCNTRL_U`, `INTEGER, dimension(20)`, `intent(out)`, `optional ISTATUS_U`, `REAL(kind=dp), dimension(20)`, `intent(out)`, `optional RSTATUS_U`, `INTEGER, intent(out)`, `optional IERR_U` )
- 5.44.1.3 subroutine `messy_mecca_kpp_Integrator::JacTemplate` ( `REAL(kind=dp) T`, `REAL(kind=dp), dimension(nvar) Y`, `REAL(kind=dp), dimension(lu_nonzero) Jcb` )
- 5.44.1.4 subroutine `messy_mecca_kpp_Integrator::Rosenbrock` ( `INTEGER, intent(in) N`, `REAL(kind=dp), dimension(n)`, `intent(inout) Y`, `REAL(kind=dp)`, `intent(in) Tstart`, `REAL(kind=dp)`, `intent(in) Tend`, `REAL(kind=dp), dimension(n)`, `intent(in) AbsTol`, `REAL(kind=dp), dimension(n)`, `intent(in) RelTol`, `REAL(kind=dp), dimension(20)`, `intent(in) RCNTRL`, `INTEGER, dimension(20)`, `intent(in) ICNTRL`, `REAL(kind=dp), dimension(20)`, `intent(inout) RSTATUS`, `INTEGER, dimension(20)`, `intent(inout) ISTATUS`, `INTEGER, intent(out) IERR` )

Here is the call graph for this function:

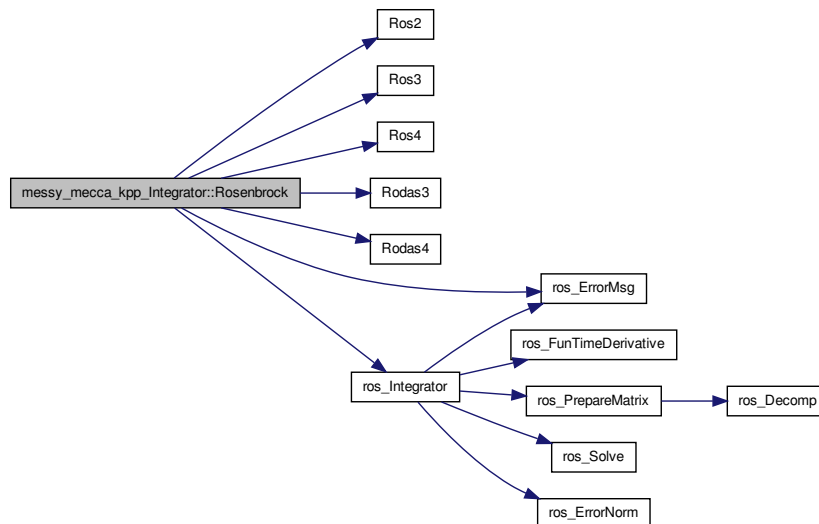

## 5.44.2 Member Data Documentation

- 5.44.2.1 CHARACTER(LEN=50), dimension(-8:1), parameter messy\_mecca\_kpp\_Integrator::IERR\_NAMES = (/ 'Matrix is repeatedly singular ', 'Step size too small ', 'No of steps exceeds maximum bound ', 'Improper tolerance values ', 'FacMin/FacMax/FacRej must be positive ', 'Hmin/Hmax/Hstart must be positive ', 'Selected Rosenbrock method not implemented ', 'Improper value for maximal no of steps ', ' ', 'Success ' /)
- 5.44.2.2 INTEGER, parameter messy\_mecca\_kpp\_Integrator::Nacc = 4
- 5.44.2.3 INTEGER, parameter messy\_mecca\_kpp\_Integrator::Ndec = 6
- 5.44.2.4 INTEGER, parameter messy\_mecca\_kpp\_Integrator::Nfun = 1
- 5.44.2.5 INTEGER, parameter messy\_mecca\_kpp\_Integrator::Nhexit = 2
- 5.44.2.6 INTEGER, parameter messy\_mecca\_kpp\_Integrator::Nhnew = 3
- 5.44.2.7 INTEGER, parameter messy\_mecca\_kpp\_Integrator::Njac = 2
- 5.44.2.8 INTEGER, parameter messy\_mecca\_kpp\_Integrator::Nrej = 5
- 5.44.2.9 INTEGER, parameter messy\_mecca\_kpp\_Integrator::Nsng = 8
- 5.44.2.10 INTEGER, parameter messy\_mecca\_kpp\_Integrator::Nsol = 7
- 5.44.2.11 INTEGER, parameter messy\_mecca\_kpp\_Integrator::Nstp = 3
- 5.44.2.12 INTEGER, parameter messy\_mecca\_kpp\_Integrator::Ntexit = 1

The documentation for this module was generated from the following file:

- /home/sander/e2/messy\_d2.50s\_rs/messy/mbm/caaba/[messy\\_mecca\\_kpp\\_integrator.f90](#)

## 5.45 messy\_mecca\_kpp\_Jacobian Module Reference

### Public Member Functions

- subroutine [Jac\\_SP](#) (V, F, RCT, JVS)
- subroutine [Jac\\_SP\\_Vec](#) (JVS, UV, JUV)
- subroutine [JacTR\\_SP\\_Vec](#) (JVS, UV, JTUV)

### 5.45.1 Member Function/Subroutine Documentation



38, 40, 15, 36, 38, 42, 16, 34, 37, 38, 17, 32, 33, 38, 40, 18, 38, 39, 42, 19, 27, 34, 37, 38, 40, 20, 38, 40, 42, 21, 31, 38, 40, 22, 26, 35, 36, 40, 7, 23, 31, 36, 38, 39, 41, 24, 34, 37, 38, 40, 42, 25, 28, 29, 30, 32, 33, 38, 39, 3, 22, 26, 34, 35, 36, 38, 40, 13, 22, 26, 27, 34, 35, 36, 37, 38, 40, 4, 28, 30, 35, 37, 38, 10, 21, 23, 29, 31, 33, 34, 36, 38, 39, 40, 41, 8, 28, 30, 33, 35, 37, 38, 40, 41, 42, 21, 23, 31, 32, 33, 34, 36, 38, 39, 40, 41, 15, 16, 18, 20, 24, 25, 28, 29, 30, 31, 32, 33, 34, 35, 36, 37, 38, 39, 40, 41, 42, 5, 14, 17, 20, 21, 31, 32, 33, 34, 35, 36, 37, 38, 39, 40, 41, 42, 13, 16, 19, 22, 26, 27, 31, 32, 33, 34, 35, 36, 37, 38, 39, 40, 41, 42, 22, 26, 28, 30, 33, 34, 35, 36, 37, 38, 39, 40, 41, 42, 6, 9, 10, 12, 14, 18, 21, 23, 25, 26, 27, 28, 29, 30, 31, 32, 33, 34, 35, 36, 37, 38, 39, 40, 41, 42, 15, 16, 18, 20, 24, 28, 30, 33, 34, 35, 36, 37, 38, 39, 40, 41, 42, 3, 4, 6, 8, 10, 11, 12, 13, 14, 15, 16, 17, 18, 19, 20, 21, 22, 23, 24, 25, 26, 27, 28, 29, 30, 31, 32, 33, 34, 35, 36, 37, 38, 39, 40, 41, 42, 7, 18, 25, 28, 29, 30, 31, 32, 33, 34, 35, 36, 37, 38, 39, 40, 41, 42, 5, 14, 17, 19, 20, 21, 24, 26, 27, 31, 32, 33, 34, 35, 36, 37, 38, 39, 40, 41, 42, 3, 4, 6 /)

- INTEGER, dimension(48), parameter [LU\\_ICOL\\_1](#) = (/ 7, 8, 10, 11, 12, 13, 14, 15, 16, 17, 18, 19, 20, 21, 22, 23, 24, 26, 27, 28, 29, 30, 31, 32, 33, 34, 35, 36, 37, 38, 39, 40, 41, 42, 15, 20, 28, 30, 33, 34, 35, 36, 37, 38, 39, 40, 41, 42 /)
- INTEGER, dimension(408), parameter [LU\\_ICOL](#) = (/ [LU\\_ICOL\\_0](#), [LU\\_ICOL\\_1](#) /)
- INTEGER, dimension(43), parameter [LU\\_CROW](#) = (/ 1, 4, 10, 12, 14, 17, 20, 23, 26, 34, 37, 41, 46, 51, 55, 59, 63, 68, 72, 78, 82, 86, 91, 98, 104, 112, 120, 130, 136, 148, 158, 169, 190, 207, 225, 239, 265, 282, 319, 337, 358, 395, 409 /)
- INTEGER, dimension(43), parameter [LU\\_DIAG](#) = (/ 1, 4, 10, 12, 14, 17, 20, 23, 26, 34, 37, 41, 47, 51, 55, 59, 63, 68, 72, 78, 82, 86, 92, 98, 104, 114, 123, 131, 139, 150, 160, 179, 197, 216, 231, 258, 276, 314, 333, 355, 393, 408, 409 /)

### 5.46.1 Member Data Documentation

- 5.46.1.1 INTEGER, dimension(43), parameter `messy_mecca_kpp_JacobianSP::LU_CROW` = (/ 1, 4, 10, 12, 14, 17, 20, 23, 26, 34, 37, 41, 46, 51, 55, 59, 63, 68, 72, 78, 82, 86, 91, 98, 104, 112, 120, 130, 136, 148, 158, 169, 190, 207, 225, 239, 265, 282, 319, 337, 358, 395, 409 /)
- 5.46.1.2 INTEGER, dimension(43), parameter `messy_mecca_kpp_JacobianSP::LU_DIAG` = (/ 1, 4, 10, 12, 14, 17, 20, 23, 26, 34, 37, 41, 47, 51, 55, 59, 63, 68, 72, 78, 82, 86, 92, 98, 104, 114, 123, 131, 139, 150, 160, 179, 197, 216, 231, 258, 276, 314, 333, 355, 393, 408, 409 /)
- 5.46.1.3 INTEGER, dimension(408), parameter `messy_mecca_kpp_JacobianSP::LU_ICOL` = (/ [LU\\_ICOL\\_0](#), [LU\\_ICOL\\_1](#) /)

- The documentation for this module was generated from the following file:

- [/home/sander/e2/messy\\_d2.50s\\_rs/messy/mbm/caaba/messy\\_mecca\\_kpp\\_jacobiansp.f90](#)

## 5.47 messy\_mecca\_kpp\_LinearAlgebra Module Reference

### Public Member Functions

- subroutine [KppDecomp](#) (JVS, IER)
- subroutine [KppDecompCmplx](#) (JVS, IER)
- subroutine [KppDecompCmplxR](#) (JVSR, JVSI, IER)
- subroutine [KppSolveIndirect](#) (JVS, X)
- subroutine [KppSolveTRIndirect](#) (JVS, X)
- subroutine [KppSolveCmplx](#) (JVS, X)
- subroutine [KppSolveCmplxR](#) (JVSR, JVSI, XR, XI)
- subroutine [KppSolveTRCmplx](#) (JVS, X)
- subroutine [KppSolveTRCmplxR](#) (JVSR, JVSI, XR, XI)
- subroutine [KppSolve](#) (JVS, X)
- subroutine [KppSolveTR](#) (JVS, X, XX)
- subroutine [WCOPY](#) (N, X, incX, Y, incY)
- subroutine [WAXPY](#) (N, Alpha, X, incX, Y, incY)
- subroutine [WSCAL](#) (N, Alpha, X, incX)
- REAL(kind=dp) function [WLAMCH](#) (C)
- subroutine [WLAMCH\\_ADD](#) (A, B, Suma)
- subroutine [SET2ZERO](#) (N, Y)
- REAL(kind=dp) function [WDOT](#) (N, DX, incX, DY, incY)
- subroutine [WADD](#) (N, X, Y, Z)
- subroutine [WGEFA](#) (N, A, lpvt, info)
- subroutine [WGESL](#) (Trans, N, A, lpvt, b)

### 5.47.1 Member Function/Subroutine Documentation

- 5.47.1.1 subroutine `messy_mecca_kpp_LinearAlgebra::KppDecomp` ( REAL(kind=dp), dimension(lu\_nonzero) *JVS*, INTEGER *IER* )
- 5.47.1.2 subroutine `messy_mecca_kpp_LinearAlgebra::KppDecompCmplx` ( DOUBLE COMPLEX, dimension(lu\_nonzero) *JVS*, INTEGER *IER* )
- 5.47.1.3 subroutine `messy_mecca_kpp_LinearAlgebra::KppDecompCmplxR` ( REAL(kind=dp), dimension(lu\_nonzero) *JVSR*, REAL(kind=dp), dimension(lu\_nonzero) *JVSI*, INTEGER *IER* )
- 5.47.1.4 subroutine `messy_mecca_kpp_LinearAlgebra::KppSolve` ( REAL(kind=dp), dimension(lu\_nonzero) *JVS*, REAL(kind=dp), dimension(nvar) *X* )

- 5.47.1.5 subroutine messy\_mecca\_kpp\_LinearAlgebra::KppSolveCmplx ( DOUBLE COMPLEX, dimension(lu\_nonzero) *JVS*, DOUBLE COMPLEX, dimension(nvar) *X* )
- 5.47.1.6 subroutine messy\_mecca\_kpp\_LinearAlgebra::KppSolveCmplxR ( REAL(kind=dp), dimension(lu\_nonzero) *JVSR*, REAL(kind=dp), dimension(lu\_nonzero) *JVSI*, REAL(kind=dp), dimension(nvar) *XR*, REAL(kind=dp), dimension(nvar) *XI* )
- 5.47.1.7 subroutine messy\_mecca\_kpp\_LinearAlgebra::KppSolveIndirect ( REAL(kind=dp), dimension(lu\_nonzero) *JVS*, REAL(kind=dp), dimension(nvar) *X* )
- 5.47.1.8 subroutine messy\_mecca\_kpp\_LinearAlgebra::KppSolveTR ( REAL(kind=dp), dimension(lu\_nonzero) *JVS*, REAL(kind=dp), dimension(nvar) *X*, REAL(kind=dp), dimension(nvar) *XX* )
- 5.47.1.9 subroutine messy\_mecca\_kpp\_LinearAlgebra::KppSolveTRCmplx ( DOUBLE COMPLEX, dimension(lu\_nonzero) *JVS*, DOUBLE COMPLEX, dimension(nvar) *X* )
- 5.47.1.10 subroutine messy\_mecca\_kpp\_LinearAlgebra::KppSolveTRCmplxR ( REAL(kind=dp), dimension(lu\_nonzero) *JVSR*, REAL(kind=dp), dimension(lu\_nonzero) *JVSI*, REAL(kind=dp), dimension(nvar) *XR*, REAL(kind=dp), dimension(nvar) *XI* )
- 5.47.1.11 subroutine messy\_mecca\_kpp\_LinearAlgebra::KppSolveTRIndirect ( REAL(kind=dp), dimension(lu\_nonzero) *JVS*, REAL(kind=dp), dimension(nvar) *X* )
- 5.47.1.12 subroutine messy\_mecca\_kpp\_LinearAlgebra::SET2ZERO ( INTEGER *N*, REAL(kind=dp), dimension(n) *Y* )
- 5.47.1.13 subroutine messy\_mecca\_kpp\_LinearAlgebra::WADD ( INTEGER *N*, REAL(kind=dp), dimension(n) *X*, REAL(kind=dp), dimension(n) *Y*, REAL(kind=dp), dimension(n) *Z* )
- 5.47.1.14 subroutine messy\_mecca\_kpp\_LinearAlgebra::WAXPY ( INTEGER *N*, REAL(kind=dp) *Alpha*, REAL(kind=dp), dimension(n) *X*, INTEGER *incX*, REAL(kind=dp), dimension(n) *Y*, INTEGER *incY* )
- 5.47.1.15 subroutine messy\_mecca\_kpp\_LinearAlgebra::WCOPY ( INTEGER *N*, REAL(kind=dp), dimension(n) *X*, INTEGER *incX*, REAL(kind=dp), dimension(n) *Y*, INTEGER *incY* )
- 5.47.1.16 REAL(kind=dp) function messy\_mecca\_kpp\_LinearAlgebra::WDOT ( INTEGER *N*, REAL(kind=dp), dimension(n) *DX*, INTEGER *incX*, REAL(kind=dp), dimension(n) *DY*, INTEGER *incY* )
- 5.47.1.17 subroutine messy\_mecca\_kpp\_LinearAlgebra::WGEFA ( INTEGER *N*, REAL(kind=dp), dimension(n,n) *A*, INTEGER, dimension(n) *lpvt*, INTEGER *info* )

- 5.47.1.18 subroutine `messy_mecca_kpp_LinearAlgebra::WGESL` ( CHARACTER *Trans*, INTEGER *N*, REAL(kind=dp), dimension(n,n) *A*, INTEGER, dimension(n) *lpvt*, REAL(kind=dp), dimension(n) *b* )
- 5.47.1.19 REAL(kind=dp) function `messy_mecca_kpp_LinearAlgebra::WLAMCH` ( CHARACTER *C* )
- 5.47.1.20 subroutine `messy_mecca_kpp_LinearAlgebra::WLAMCH_ADD` ( REAL(kind=dp) *A*, REAL(kind=dp) *B*, REAL(kind=dp) *Suma* )
- 5.47.1.21 subroutine `messy_mecca_kpp_LinearAlgebra::WSCAL` ( INTEGER *N*, REAL(kind=dp) *Alpha*, REAL(kind=dp), dimension(n) *X*, INTEGER *incX* )

The documentation for this module was generated from the following file:

- [/home/sander/e2/messy\\_d2.50s\\_rs/messy/mbm/caaba/messy\\_mecca\\_kpp\\_linearalgebra.f90](/home/sander/e2/messy_d2.50s_rs/messy/mbm/caaba/messy_mecca_kpp_linearalgebra.f90)

## 5.48 messy\_mecca\_kpp\_Monitor Module Reference

### Public Attributes

- CHARACTER(LEN=32), dimension(45), parameter `SPC_NAMES` = (/ 'N2O ', 'LCARBON ', 'NH3 ', 'CH4 ', 'N2O5 ', 'H2O2 ', 'H2OH2O ', 'O1D ', 'H ', 'HOCH2OH ', 'NH2OH ', 'H2 ', 'NHOH ', 'HNO4 ', 'CH3OOH ', 'CH3ONO ', 'HNO3 ', 'CH3OH ', 'HONO ', 'CH3O2NO2 ', 'HOCH2O2NO2 ', 'NH2O ', 'HOCH2OOH ', 'CH3NO3 ', 'CO ', 'NH2 ', 'HNO ', 'CH3 ', 'HCOOH ', 'O3P ', 'HOCH2O2 ', 'HCHO ', 'NO3 ', 'NO ', 'O3 ', 'HO2 ', 'CH3O ', 'OH ', 'CH2OO ', 'NO2 ', 'H2O ', 'CH3O2 ', 'O2 ', 'N2 ', 'CO2 ' /)
- INTEGER, dimension(1) `LOOKAT`
- INTEGER, dimension(1) `MONITOR`
- CHARACTER(LEN=32), dimension(1) `SMASS`
- CHARACTER(LEN=100), dimension(30), parameter `EQN_NAMES_0` = (/ ' O1D + O2 --> O3P + O2 ', ' O3P + O2 --> O3 ', ' H + O2 --> HO2 ', ' O3 + OH --> HO2 + O2 ', ' H2 + OH --> H + H2O ', ' O3 + HO2 --> OH + 2 O2 ', ' HO2 + OH --> H2O + O2 ', ' 2 HO2 --> H2O2 + O2 ', ' O1D + H2O --> 2 OH ', ' H2O2 + OH --> HO2 + H2O ', ' 2 H2O --> H2OH2O ', ' H2OH2O --> 2 H2O ', ' O1D + N2 --> O3P + N2 ', ' NO + O3 --> NO2 + O2 ', ' O3 + NO2 --> NO3 + O2 ', ' NO3 + NO --> 2 NO2 ', ' NO3 + NO2 --> N2O5 ', ' N2O5 --> NO3 + NO2 ', ' NO + OH --> HONO ', ' NO + HO2 --> OH + NO2 ', ' OH + NO2 --> HNO3 ', ' HO2 + NO2 --> HNO4 ', ' NO3 + HO2 --> OH + NO2 + O2 ', ' HONO + OH --> NO2 + H2O ', ' HNO3 + OH --> NO3 + H2O ', ' HNO4 --> HO2 + NO2 ', ' HNO4 + OH --> NO2 + H2O ', ' NH3 + OH --> NH2 + H2O ', ' NH2 + O3 --> NH2O + O2 ', ' NH2 + HO2 --> NH2O + OH ' /)
- CHARACTER(LEN=100), dimension(30), parameter `EQN_NAMES_1` = (/ ' NH2 + HO2 --> HNO + H2O ', ' NH2 + NO --> HO2 + OH + N2 ', ' NH2 + NO --> H2O + N2 ', ' NH2 + NO2 --> N2O + H2O ', ' NH2 + NO2 --> NH2O + NO ', ' NH2O + O3 --> NH2 + O2 ', ' NH2O --> NHOH ', ' HNO + OH --> NO + H2O ',



- ' NHOH + HNO --> NH2OH + NO ', ' HNO + NO2 --> HONO + NO ', ' NHOH + OH --> HNO + H2O ', ' NH2OH + OH --> NHOH + H2O ', ' HNO + O2 --> NO + HO2 ', ' CH4 + OH --> CH3 + H2O ', ' CH3OH + OH --> 0.85 HCHO + 0.85 HO2 + 0.15 CH3O + H2O ', ' HO2 + CH3O2 --> CH3OOH + O2 ', ' HO2 + CH3O2 --> HCHO + H2O + O2 ', ' NO + CH3O2 --> CH3O + NO2 ', ' NO + CH3O2 --> CH3NO3 ', ' NO3 + CH3O2 --> CH3O + NO2 + O2 ', ' CH3O2 --> CH3O + 0.5 O2 ', ' CH3O2 --> 0.5 CH3OH + 0.5 HCHO + 0.5 O2 ', ' CH3OOH + OH --> 0.4 HCHO + 0.4 OH + H2O + 0.6 CH3O2 ', ' HCHO + OH --> CO + HO2 + H2O ', ' HCHO + NO3 --> HNO3 + CO + HO2 ', ' CO + OH --> H + CO2 ', ' HCOOH + OH --> HO2 + H2O + CO2 ', ' NO2 + CH3O2 --> CH3O2NO2 ', ' CH3O2NO2 --> NO2 + CH3O2 ', ' CH3O2NO2 + OH --> HCHO + NO3 + H2O ' /)
- CHARACTER(LEN=100), dimension(30), parameter [EQN\\_NAMES\\_2](#) = (/ ' C-H3NO3 + OH --> HCHO + NO2 + H2O ', ' CH3O --> HCHO + HO2 ', ' CH3O + NO2 --> CH3NO3 ', ' CH3O + NO2 --> HONO + HCHO ', ' NO + CH3O --> CH3ONO ', ' NO + CH3O --> HNO + HCHO ', ' O3 + CH3O2 --> CH3O + 2 O2 ', ' CH3ONO + OH --> HCHO + NO + H2O ', ' HCHO + HO2 --> HOCH2O2 ', ' HOCH2O2 --> HCHO + HO2 ', ' HOCH2O2 + HO2 --> 0.5 HOCH2OOH + 0.5 HCOOH + 0.2 HO2 + 0.2 OH + 0.3 H2O ... etc. ', ' HOCH2O2 + NO --> HCOOH + HO2 + NO2 ', ' HOCH2O2 + NO3 --> HCOOH + HO2 + NO2 ', ' HOCH2O2 --> HCOOH + HO2 ', ' HOCH2O2 --> 0.5 HOCH2OH + 0.5 HCOOH + 0.5 O2 ', ' HOCH2OOH + OH --> HOCH2O2 + H2O ', ' HOCH2OOH + OH --> HCOOH + OH + H2O ', ' HOCH2OH + OH --> HCOOH + HO2 + H2O ', ' OH + CH3O2 --> 0.2 HO2 + 0.2 CH3O + 0.8 CH2OO + 0.8 H2O ', ' CH2OO --> CO + HO2 + OH ', ' CH2OO + H2O --> HOCH2OOH ', ' H2OH2O + CH2OO --> HOCH2OOH + H2O ', ' NO + CH2OO --> HCHO + NO2 ', ' CH2OO + NO2 --> HCHO + NO3 ', ' CO + CH2OO --> HCHO + CO2 ', ' HCOOH + CH2OO --> 2 HCOOH ', ' HCHO + CH2OO --> 2 LCARBON ', ' CH3OH + CH2OO --> 2 LCARBON ', ' CH2OO + CH3O2 --> 2 LCARBON ', ' HO2 + CH2OO --> LCARBON ' /)
  - CHARACTER(LEN=100), dimension(30), parameter [EQN\\_NAMES\\_3](#) = (/ ' O3 + CH2OO --> HCHO + 2 O2 ', ' 2 CH2OO --> 2 HCHO + O2 ', ' HOCH2O2 + NO2 --> HOCH2O2NO2 ', ' HOCH2O2NO2 --> HOCH2O2 + NO2 ', ' HOCH2O2NO2 + OH --> HCOOH + NO3 + H2O ', ' CH3 + O2 --> CH3O2 ', ' CH3 + O3 --> 0.954 H + 0.954 HCHO + 0.044 CH3O + O2 ', ' CH3 + O3P --> H + 0.17 H2 + 0.17 CO + 0.83 HCHO ', ' O3 + CH3O --> CH3O2 + O2 ', ' O3P + CH3O --> 0.75 CH3 + 0.25 HCHO + 0.25 OH + 0.75 O2 ', ' O3P + CH3O2 --> CH3O + O2 ', ' O2 --> 2 O3P ', ' O3 --> O1D + O2 ', ' O3 --> O3P + O2 ', ' H2O2 --> 2 OH ', ' NO2 --> O3P + NO ', ' NO3 --> O3P + NO2 ', ' NO3 --> NO + O2 ', ' N2O5 --> NO3 + NO2 ', ' HONO --> NO + OH ', ' HNO3 --> OH + NO2 ', ' HNO4 --> 0.333 NO3 + 0.667 HO2 + 0.333 OH + 0.667 NO2 ', ' CH3OOH --> CH3O + OH ', ' HCHO --> H2 + CO ', ' HCHO --> H + CO + HO2 ', ' CH3ONO --> NO + CH3O ', ' CH3NO3 --> CH3O + NO2 ', ' CH3O2NO2 --> 0.333 NO3 + 0.333 CH3O + 0.667 NO2 + 0.667 CH3O2 ', ' HOCH2OOH --> HCOOH + HO2 + OH ', ' CH3O2 --> HCHO + OH ' /)
  - CHARACTER(LEN=100), dimension(2), parameter [EQN\\_NAMES\\_4](#) = (/ ' HCOOH --> CO + HO2 + OH ', ' HOCH2O2NO2 --> 0.333 HCOOH + 0.667 HOCH2O2 + 0.333 NO3 + 0.333 HO2 ... etc. ' /)
  - CHARACTER(LEN=100), dimension(122), parameter [EQN\\_NAMES](#) = (/ [EQN\\_NAMES\\_0](#), [EQN\\_NAMES\\_1](#), [EQN\\_NAMES\\_2](#), [EQN\\_NAMES\\_3](#), [EQN\\_NAMES\\_4](#) /)

- CHARACTER(LEN=32), dimension(90), parameter [EQN\\_TAGS\\_0](#) = (/ 'G1000', 'G1001', 'G2100', 'G2104', 'G2105', 'G2107', 'G2109', 'G2110', 'G2111', 'G2112', 'G2117', 'G2118', 'G3101', 'G3103', 'G3106', 'G3108', 'G3109', 'G3110', 'G3200', 'G3201', 'G3202', 'G3203', 'G3204', 'G3205', 'G3206', 'G3207', 'G3208', 'G3209', 'G3210', 'G3211', 'G3212', 'G3213', 'G3214', 'G3215', 'G3216', 'G3217', 'G3218', 'G3219', 'G3220', 'G3221', 'G3222', 'G3223', 'G3224', 'G4101', 'G4102', 'G4103a', 'G4103b', 'G4104a', 'G4104b', 'G4105', 'G4106a', 'G4106b', 'G4107', 'G4108', 'G4109', 'G4110', 'G4111', 'G4114', 'G4115', 'G4116', 'G4117', 'G4118', 'G4119a', 'G4119b', 'G4120a', 'G4120b', 'G4121', 'G4122', 'G4123', 'G4124', 'G4125', 'G4126', 'G4127', 'G4129a', 'G4129b', 'G4130', 'G4131', 'G4132', 'G4133', 'G4134', 'G4135', 'G4136', 'G4137', 'G4138', 'G4140', 'G4141', 'G4142', 'G4143', 'G4144', 'G4145' /)
- CHARACTER(LEN=32), dimension(32), parameter [EQN\\_TAGS\\_1](#) = (/ 'G4146', 'G4147', 'G4148', 'G4149', 'G4150', 'G4151', 'G4152', 'G4153', 'G4154', 'G4155', 'G4156', 'J1000a', 'J1001a', 'J1001b', 'J2101', 'J3101', 'J3103a', 'J3103b', 'J3104', 'J3200', 'J3201', 'J3202', 'J4100', 'J4101a', 'J4101b', 'J4104', 'J4105', 'J4106', 'J4107', 'J4108', 'J4109', 'J4110' /)
- CHARACTER(LEN=32), dimension(122), parameter [EQN\\_TAGS](#) = (/ [EQN\\_TAGS\\_0](#), [EQN\\_TAGS\\_1](#) /)

### 5.48.1 Member Data Documentation

- 5.48.1.1 CHARACTER(LEN=100), dimension(122), parameter messy\_mecca\_kpp\_Monitor::EQN\_NAMES = (/ EQN\_NAMES\_0, EQN\_NAMES\_1, EQN\_NAMES\_2, EQN\_NAMES\_3, EQN\_NAMES\_4 /)
- 5.48.1.2 CHARACTER(LEN=100), dimension(30), parameter messy\_mecca\_kpp\_Monitor::EQN\_NAMES\_0 = (/ 'O1D + O2 --> O3P + O2', 'O3P + O2 --> O3', 'H + O2 --> HO2', 'O3 + OH --> HO2 + O2', 'H2 + OH --> H + H2O', 'O3 + HO2 --> OH + 2 O2', 'HO2 + OH --> H2O + O2', '2 HO2 --> H2O2 + O2', 'O1D + H2O --> 2 OH', 'H2O2 + OH --> HO2 + H2O', '2 H2O --> H2OH2O', 'H2OH2O --> 2 H2O', 'O1D + N2 --> O3P + N2', 'NO + O3 --> NO2 + O2', 'O3 + NO2 --> NO3 + O2', 'NO3 + NO --> 2 NO2', 'NO3 + NO2 --> N2O5', 'N2O5 --> NO3 + NO2', 'NO + OH --> HONO', 'NO + HO2 --> OH + NO2', 'OH + NO2 --> HNO3', 'HO2 + NO2 --> HNO4', 'NO3 + HO2 --> OH + NO2 + O2', 'HONO + OH --> NO2 + H2O', 'HNO3 + OH --> NO3 + H2O', 'HNO4 --> HO2 + NO2', 'HNO4 + OH --> NO2 + H2O', 'NH3 + OH --> NH2 + H2O', 'NH2 + O3 --> NH2O + O2', 'NH2 + HO2 --> NH2O + OH' /)

- 5.48.1.3 CHARACTER(LEN=100), dimension(30), parameter messy\_mecca\_kpp\_Monitor::  
 EQN\_NAMES\_1 = (/ ' NH2 + HO2 --> HNO + H2O ', ' NH2 + NO --> HO2 + OH + N2 ',  
 ' NH2 + NO --> H2O + N2 ', ' NH2 + NO2 --> N2O + H2O ', ' NH2 + NO2 --> NH2O + NO ',  
 ' NH2O + O3 --> NH2 + O2 ', ' NH2O --> NHOH ', ' HNO + OH --> NO + H2O ', ' NHOH +  
 ' HNO --> NH2OH + NO ', ' HNO + NO2 --> HONO + NO ', ' NHOH + OH --> HNO + H2O ',  
 ' NH2OH + OH --> NHOH + H2O ', ' HNO + O2 --> NO + HO2 ', ' CH4 + OH --> CH3 + H2O  
 ', ' CH3OH + OH --> 0.85 HCHO + 0.85 HO2 + 0.15 CH3O + H2O ', ' HO2 + CH3O2 -->  
 ' CH3OOH + O2 ', ' HO2 + CH3O2 --> HCHO + H2O + O2 ', ' NO + CH3O2 --> CH3O + NO2  
 ', ' NO + CH3O2 --> CH3NO3 ', ' NO3 + CH3O2 --> CH3O + NO2 + O2 ', ' CH3O2 -->  
 ' CH3O + 0.5 O2 ', ' CH3O2 --> 0.5 CH3OH + 0.5 HCHO + 0.5 O2 ', ' CH3OOH + OH --> 0.4  
 ' HCHO + 0.4 OH + H2O + 0.6 CH3O2 ', ' HCHO + OH --> CO + HO2 + H2O ', ' HCHO + NO3  
 --> HNO3 + CO + HO2 ', ' CO + OH --> H + CO2 ', ' HCOOH + OH --> HO2 + H2O + CO2  
 ', ' NO2 + CH3O2 --> CH3O2NO2 ', ' CH3O2NO2 --> NO2 + CH3O2 ', ' CH3O2NO2 + OH  
 --> HCHO + NO3 + H2O ' /)
- 5.48.1.4 CHARACTER(LEN=100), dimension(30), parameter messy\_mecca\_kpp\_Monitor::  
 EQN\_NAMES\_2 = (/ ' CH3NO3 + OH --> HCHO + NO2 + H2O ', ' CH3O --> HCHO +  
 ' HO2 ', ' CH3O + NO2 --> CH3NO3 ', ' CH3O + NO2 --> HONO + HCHO ', ' NO + CH3O -->  
 ' CH3ONO ', ' NO + CH3O --> HNO + HCHO ', ' O3 + CH3O2 --> CH3O + 2 O2 ', ' CH3ONO  
 + OH --> HCHO + NO + H2O ', ' HCHO + HO2 --> HOCH2O2 ', ' HOCH2O2 --> HCHO +  
 ' HO2 ', ' HOCH2O2 + HO2 --> 0.5 HOCH2OOH + 0.5 HCOOH + 0.2 HO2 + 0.2 OH + 0.3 H2O  
 ... etc. ', ' HOCH2O2 + NO --> HCOOH + HO2 + NO2 ', ' HOCH2O2 + NO3 --> HCOOH +  
 ' HO2 + NO2 ', ' HOCH2O2 --> HCOOH + HO2 ', ' HOCH2O2 --> 0.5 HOCH2OH + 0.5  
 ' HCOOH + 0.5 O2 ', ' HOCH2OOH + OH --> HOCH2O2 + H2O ', ' HOCH2OOH + OH -->  
 ' HCOOH + OH + H2O ', ' HOCH2OH + OH --> HCOOH + HO2 + H2O ', ' OH + CH3O2 -->  
 ' 0.2 HO2 + 0.2 CH3O + 0.8 CH2OO + 0.8 H2O ', ' CH2OO --> CO + HO2 + OH ', ' CH2OO +  
 ' H2O --> HOCH2OOH ', ' H2OH2O + CH2OO --> HOCH2OOH + H2O ', ' NO + CH2OO -->  
 ' HCHO + NO2 ', ' CH2OO + NO2 --> HCHO + NO3 ', ' CO + CH2OO --> HCHO + CO2 ',  
 ' HCOOH + CH2OO --> 2 HCOOH ', ' HCHO + CH2OO --> 2 LCARBON ', ' CH3OH +  
 ' CH2OO --> 2 LCARBON ', ' CH2OO + CH3O2 --> 2 LCARBON ', ' HO2 + CH2OO -->  
 ' LCARBON ' /)
- 5.48.1.5 CHARACTER(LEN=100), dimension(30), parameter messy\_mecca\_kpp\_Monitor::  
 EQN\_NAMES\_3 = (/ ' O3 + CH2OO --> HCHO + 2 O2 ', ' 2 CH2OO --> 2 HCHO + O2  
 ', ' HOCH2O2 + NO2 --> HOCH2O2NO2 ', ' HOCH2O2NO2 --> HOCH2O2 + NO2 ',  
 ' HOCH2O2NO2 + OH --> HCOOH + NO3 + H2O ', ' CH3 + O2 --> CH3O2 ', ' CH3 + O3 -->  
 ' 0.954 H + 0.954 HCHO + 0.044 CH3O + O2 ', ' CH3 + O3P --> H + 0.17 H2 + 0.17 CO + 0.83  
 ' HCHO ', ' O3 + CH3O --> CH3O2 + O2 ', ' O3P + CH3O --> 0.75 CH3 + 0.25 HCHO + 0.25  
 ' OH + 0.75 O2 ', ' O3P + CH3O2 --> CH3O + O2 ', ' O2 --> 2 O3P ', ' O3 --> O1D + O2 ',  
 ' O3 --> O3P + O2 ', ' H2O2 --> 2 OH ', ' NO2 --> O3P + NO ', ' NO3 --> O3P + NO2 ',  
 ' NO3 --> NO + O2 ', ' N2O5 --> NO3 + NO2 ', ' HONO --> NO + OH ', ' HNO3 --> OH +  
 ' NO2 ', ' HNO4 --> 0.333 NO3 + 0.667 HO2 + 0.333 OH + 0.667 NO2 ', ' CH3OOH --> CH3O  
 + OH ', ' HCHO --> H2 + CO ', ' HCHO --> H + CO + HO2 ', ' CH3ONO --> NO + CH3O ',  
 ' CH3NO3 --> CH3O + NO2 ', ' CH3O2NO2 --> 0.333 NO3 + 0.333 CH3O + 0.667 NO2 +  
 ' 0.667 CH3O2 ', ' HOCH2OOH --> HCOOH + HO2 + OH ', ' CH3O2 --> HCHO + OH ' /)
- 5.48.1.6 CHARACTER(LEN=100), dimension(2), parameter messy\_mecca\_kpp\_Monitor::  
 EQN\_NAMES\_4 = (/ ' HCOOH --> CO + HO2 + OH ', ' HOCH2O2NO2 --> 0.333  
 ' HCOOH + 0.667 HOCH2O2 + 0.333 NO3 + 0.333 HO2 ... etc. ' /)

- 5.48.1.7 CHARACTER(LEN=32), dimension(122), parameter messy\_mecca\_kpp\_Monitor::EQN\_TAGS = (/ EQN\_TAGS\_0, EQN\_TAGS\_1 /)
- 5.48.1.8 CHARACTER(LEN=32), dimension(90), parameter messy\_mecca\_kpp\_Monitor::EQN\_TAGS\_0 = (/ 'G1000','G1001','G2100','G2104','G2105','G2107','G2109','G2110','G2111','G2112','G2117','G2118','G3101','G3103','G3106','G3108','G3109','G3110','G3200','G3201','G3202','G3203','G3204','G3205','G3206','G3207','G3208','G3209','G3210','G3211','G3212','G3213','G3214','G3215','G3216','G3217','G3218','G3219','G3220','G3221','G3222','G3223','G3224','G4101','G4102','G4103a','G4103b','G4104a','G4104b','G4105','G4106a','G4106b','G4107','G4108','G4109','G4110','G4111','G4114','G4115','G4116','G4117','G4118','G4119a','G4119b','G4120a','G4120b','G4121','G4122','G4123','G4124','G4125','G4126','G4127','G4129a','G4129b','G4130','G4131','G4132','G4133','G4134','G4135','G4136','G4137','G4138','G4140','G4141','G4142','G4143','G4144','G4145' /)
- 5.48.1.9 CHARACTER(LEN=32), dimension(32), parameter messy\_mecca\_kpp\_Monitor::EQN\_TAGS\_1 = (/ 'G4146','G4147','G4148','G4149','G4150','G4151','G4152','G4153','G4154','G4155','G4156','J1000a','J1001a','J1001b','J2101','J3101','J3103a','J3103b','J3104','J3200','J3201','J3202','J4100','J4101a','J4101b','J4104','J4105','J4106','J4107','J4108','J4109','J4110' /)
- 5.48.1.10 INTEGER, dimension(1) messy\_mecca\_kpp\_Monitor::LOOKAT
- 5.48.1.11 INTEGER, dimension(1) messy\_mecca\_kpp\_Monitor::MONITOR
- 5.48.1.12 CHARACTER(LEN=32), dimension(1) messy\_mecca\_kpp\_Monitor::SMASS
- 5.48.1.13 CHARACTER(LEN=32), dimension(45), parameter messy\_mecca\_kpp\_Monitor::SPC\_NAMES = (/ 'N2O','LCARBON','NH3','CH4','N2O5','H2O2','H2OH2O','O1D','H','HOCH2OH','NH2OH','H2','NHOH','HNO4','CH3OOH','CH3ONO','HNO3','CH3OH','HONO','CH3O2NO2','HOCH2O2NO2','NH2O','HOCH2OOH','CH3NO3','CO','NH2','HNO','CH3','HCOOH','O3P','HOCH2O2','HCHO','NO3','NO','O3','HO2','CH3O','OH','CH2OO','NO2','H2O','CH3O2','O2','N2','CO2' /)

The documentation for this module was generated from the following file:

- [/home/sander/e2/messy\\_d2.50s\\_rs/messy/mbm/caaba/messy\\_mecca\\_kpp\\_monitor.f90](#)

## 5.49 messy\_mecca\_kpp\_Parameters Module Reference

### Public Attributes

- INTEGER, parameter [NSPEC](#) = 45
- INTEGER, parameter [NVAR](#) = 42
- INTEGER, parameter [NVARACT](#) = 40

- INTEGER, parameter `NFIX` = 3
- INTEGER, parameter `NREACT` = 122
- INTEGER, parameter `NVARST` = 1
- INTEGER, parameter `NFIXST` = 43
- INTEGER, parameter `NONZERO` = 367
- INTEGER, parameter `LU_NONZERO` = 408
- INTEGER, parameter `CNVAR` = 43
- INTEGER, parameter `NLOOKAT` = 0
- INTEGER, parameter `NMONITOR` = 0
- INTEGER, parameter `NMASS` = 1
- INTEGER, parameter `ind_N2O` = 1
- INTEGER, parameter `ind_LCARBON` = 2
- INTEGER, parameter `ind_NH3` = 3
- INTEGER, parameter `ind_CH4` = 4
- INTEGER, parameter `ind_N2O5` = 5
- INTEGER, parameter `ind_H2O2` = 6
- INTEGER, parameter `ind_H2OH2O` = 7
- INTEGER, parameter `ind_O1D` = 8
- INTEGER, parameter `ind_H` = 9
- INTEGER, parameter `ind_HOCH2OH` = 10
- INTEGER, parameter `ind_NH2OH` = 11
- INTEGER, parameter `ind_H2` = 12
- INTEGER, parameter `ind_NHOH` = 13
- INTEGER, parameter `ind_HNO4` = 14
- INTEGER, parameter `ind_CH3OOH` = 15
- INTEGER, parameter `ind_CH3ONO` = 16
- INTEGER, parameter `ind_HNO3` = 17
- INTEGER, parameter `ind_CH3OH` = 18
- INTEGER, parameter `ind_HONO` = 19
- INTEGER, parameter `ind_CH3O2NO2` = 20
- INTEGER, parameter `ind_HOCH2O2NO2` = 21
- INTEGER, parameter `ind_NH2O` = 22
- INTEGER, parameter `ind_HOCH2OOH` = 23
- INTEGER, parameter `ind_CH3NO3` = 24
- INTEGER, parameter `ind_CO` = 25
- INTEGER, parameter `ind_NH2` = 26
- INTEGER, parameter `ind_HNO` = 27
- INTEGER, parameter `ind_CH3` = 28
- INTEGER, parameter `ind_HCOOH` = 29
- INTEGER, parameter `ind_O3P` = 30
- INTEGER, parameter `ind_HOCH2O2` = 31
- INTEGER, parameter `ind_HCHO` = 32
- INTEGER, parameter `ind_NO3` = 33
- INTEGER, parameter `ind_NO` = 34
- INTEGER, parameter `ind_O3` = 35
- INTEGER, parameter `ind_HO2` = 36

- INTEGER, parameter [ind\\_CH3O](#) = 37
- INTEGER, parameter [ind\\_OH](#) = 38
- INTEGER, parameter [ind\\_CH2OO](#) = 39
- INTEGER, parameter [ind\\_NO2](#) = 40
- INTEGER, parameter [ind\\_H2O](#) = 41
- INTEGER, parameter [ind\\_CH3O2](#) = 42
- INTEGER, parameter [ind\\_O2](#) = 43
- INTEGER, parameter [ind\\_N2](#) = 44
- INTEGER, parameter [ind\\_CO2](#) = 45
- INTEGER, parameter [ind\\_N](#) = 0
- INTEGER, parameter [ind\\_N2D](#) = 0
- INTEGER, parameter [ind\\_HOONO](#) = 0
- INTEGER, parameter [ind\\_HCOCO3](#) = 0
- INTEGER, parameter [ind\\_HCOCO3A](#) = 0
- INTEGER, parameter [ind\\_C2H2](#) = 0
- INTEGER, parameter [ind\\_GLYOX](#) = 0
- INTEGER, parameter [ind\\_HCOCO2H](#) = 0
- INTEGER, parameter [ind\\_CHOOCHO](#) = 0
- INTEGER, parameter [ind\\_HCOCO3H](#) = 0
- INTEGER, parameter [ind\\_HCOCH2O2](#) = 0
- INTEGER, parameter [ind\\_CH3CO3](#) = 0
- INTEGER, parameter [ind\\_HOCH2CO3](#) = 0
- INTEGER, parameter [ind\\_HOOCH2CO3](#) = 0
- INTEGER, parameter [ind\\_C2H4](#) = 0
- INTEGER, parameter [ind\\_CH3CHO](#) = 0
- INTEGER, parameter [ind\\_CH3CO2H](#) = 0
- INTEGER, parameter [ind\\_HOCH2CHO](#) = 0
- INTEGER, parameter [ind\\_CH3CO3H](#) = 0
- INTEGER, parameter [ind\\_HOCH2CO2H](#) = 0
- INTEGER, parameter [ind\\_HOCH2CO3H](#) = 0
- INTEGER, parameter [ind\\_C2H5O2](#) = 0
- INTEGER, parameter [ind\\_HOCH2CH2O](#) = 0
- INTEGER, parameter [ind\\_HOCH2CH2O2](#) = 0
- INTEGER, parameter [ind\\_C2H6](#) = 0
- INTEGER, parameter [ind\\_C2H5OOH](#) = 0
- INTEGER, parameter [ind\\_ETHGLY](#) = 0
- INTEGER, parameter [ind\\_HYETHO2H](#) = 0
- INTEGER, parameter [ind\\_PAN](#) = 0
- INTEGER, parameter [ind\\_PHAN](#) = 0
- INTEGER, parameter [ind\\_ETHOHNO3](#) = 0
- INTEGER, parameter [ind\\_C33CO](#) = 0
- INTEGER, parameter [ind\\_CHOCOCH2O2](#) = 0
- INTEGER, parameter [ind\\_HCOCH2CO3](#) = 0
- INTEGER, parameter [ind\\_ALCOCH2OOH](#) = 0
- INTEGER, parameter [ind\\_MGLYOX](#) = 0
- INTEGER, parameter [ind\\_HOCH2COCHO](#) = 0

- INTEGER, parameter [ind\\_HCOCH2CHO](#) = 0
- INTEGER, parameter [ind\\_HOCH2COCO2H](#) = 0
- INTEGER, parameter [ind\\_HCOCH2CO2H](#) = 0
- INTEGER, parameter [ind\\_HCOCH2CO3H](#) = 0
- INTEGER, parameter [ind\\_CH3COCH2O2](#) = 0
- INTEGER, parameter [ind\\_HOC2H4CO3](#) = 0
- INTEGER, parameter [ind\\_C3H6](#) = 0
- INTEGER, parameter [ind\\_CH3COCH3](#) = 0
- INTEGER, parameter [ind\\_ACETOL](#) = 0
- INTEGER, parameter [ind\\_HYPERACET](#) = 0
- INTEGER, parameter [ind\\_HOC2H4CO2H](#) = 0
- INTEGER, parameter [ind\\_HOC2H4CO3H](#) = 0
- INTEGER, parameter [ind\\_IC3H7O2](#) = 0
- INTEGER, parameter [ind\\_HYPROPO2](#) = 0
- INTEGER, parameter [ind\\_C3H8](#) = 0
- INTEGER, parameter [ind\\_IC3H7OOH](#) = 0
- INTEGER, parameter [ind\\_HYPROPO2H](#) = 0
- INTEGER, parameter [ind\\_C3PAN2](#) = 0
- INTEGER, parameter [ind\\_NOA](#) = 0
- INTEGER, parameter [ind\\_C3PAN1](#) = 0
- INTEGER, parameter [ind\\_PRONO3BO2](#) = 0
- INTEGER, parameter [ind\\_IC3H7NO3](#) = 0
- INTEGER, parameter [ind\\_PR2O2HNO3](#) = 0
- INTEGER, parameter [ind\\_C312COCO3](#) = 0
- INTEGER, parameter [ind\\_C4CODIAL](#) = 0
- INTEGER, parameter [ind\\_CO23C3CHO](#) = 0
- INTEGER, parameter [ind\\_C312COCO3H](#) = 0
- INTEGER, parameter [ind\\_CO2H3CHO](#) = 0
- INTEGER, parameter [ind\\_MACO3](#) = 0
- INTEGER, parameter [ind\\_BIACETO2](#) = 0
- INTEGER, parameter [ind\\_CHOC3COO2](#) = 0
- INTEGER, parameter [ind\\_C44O2](#) = 0
- INTEGER, parameter [ind\\_CO2H3CO3](#) = 0
- INTEGER, parameter [ind\\_MACR](#) = 0
- INTEGER, parameter [ind\\_MVK](#) = 0
- INTEGER, parameter [ind\\_BIACET](#) = 0
- INTEGER, parameter [ind\\_MACO2H](#) = 0
- INTEGER, parameter [ind\\_MVKOH](#) = 0
- INTEGER, parameter [ind\\_MACO3H](#) = 0
- INTEGER, parameter [ind\\_BIACETOH](#) = 0
- INTEGER, parameter [ind\\_C413COOOH](#) = 0
- INTEGER, parameter [ind\\_BIACETOOH](#) = 0
- INTEGER, parameter [ind\\_C44OOH](#) = 0
- INTEGER, parameter [ind\\_CO2H3CO3H](#) = 0
- INTEGER, parameter [ind\\_MACRO2](#) = 0
- INTEGER, parameter [ind\\_MEK](#) = 0

- INTEGER, parameter [ind\\_HO12CO3C4](#) = 0
- INTEGER, parameter [ind\\_MACROH](#) = 0
- INTEGER, parameter [ind\\_MACROOH](#) = 0
- INTEGER, parameter [ind\\_NC4H10](#) = 0
- INTEGER, parameter [ind\\_C312COPAN](#) = 0
- INTEGER, parameter [ind\\_MPAN](#) = 0
- INTEGER, parameter [ind\\_LMEKO2](#) = 0
- INTEGER, parameter [ind\\_LHMKABO2](#) = 0
- INTEGER, parameter [ind\\_LMKOHABO2](#) = 0
- INTEGER, parameter [ind\\_LMEKOOH](#) = 0
- INTEGER, parameter [ind\\_LHMKABOOH](#) = 0
- INTEGER, parameter [ind\\_LMKOHABOOH](#) = 0
- INTEGER, parameter [ind\\_LC4H9O2](#) = 0
- INTEGER, parameter [ind\\_LC4H9OOH](#) = 0
- INTEGER, parameter [ind\\_LC4H9NO3](#) = 0
- INTEGER, parameter [ind\\_CHOC3COCO3](#) = 0
- INTEGER, parameter [ind\\_CO23C4CO3](#) = 0
- INTEGER, parameter [ind\\_CO13C4CHO](#) = 0
- INTEGER, parameter [ind\\_CO23C4CHO](#) = 0
- INTEGER, parameter [ind\\_C513CO](#) = 0
- INTEGER, parameter [ind\\_CHOC3COOOH](#) = 0
- INTEGER, parameter [ind\\_CO23C4CO3H](#) = 0
- INTEGER, parameter [ind\\_C511O2](#) = 0
- INTEGER, parameter [ind\\_C512O2](#) = 0
- INTEGER, parameter [ind\\_C513O2](#) = 0
- INTEGER, parameter [ind\\_C5H8](#) = 0
- INTEGER, parameter [ind\\_HCOC5](#) = 0
- INTEGER, parameter [ind\\_C511OOH](#) = 0
- INTEGER, parameter [ind\\_C512OOH](#) = 0
- INTEGER, parameter [ind\\_C513OOH](#) = 0
- INTEGER, parameter [ind\\_ISOPBO2](#) = 0
- INTEGER, parameter [ind\\_ISOPDO2](#) = 0
- INTEGER, parameter [ind\\_C59O2](#) = 0
- INTEGER, parameter [ind\\_ISOPAHOH](#) = 0
- INTEGER, parameter [ind\\_ISOPBOH](#) = 0
- INTEGER, parameter [ind\\_ISOPDOH](#) = 0
- INTEGER, parameter [ind\\_ISOPBOOH](#) = 0
- INTEGER, parameter [ind\\_ISOPDOOH](#) = 0
- INTEGER, parameter [ind\\_C59OOH](#) = 0
- INTEGER, parameter [ind\\_C514OOH](#) = 0
- INTEGER, parameter [ind\\_C514O2](#) = 0
- INTEGER, parameter [ind\\_CHOC3COPAN](#) = 0
- INTEGER, parameter [ind\\_C5PAN9](#) = 0
- INTEGER, parameter [ind\\_NC4CHO](#) = 0
- INTEGER, parameter [ind\\_NISOP2](#) = 0
- INTEGER, parameter [ind\\_ISOPBNO3](#) = 0



- INTEGER, parameter [ind\\_ISOPDNO3](#) = 0
- INTEGER, parameter [ind\\_NISOPOOH](#) = 0
- INTEGER, parameter [ind\\_C514NO3](#) = 0
- INTEGER, parameter [ind\\_LHC4ACCO3](#) = 0
- INTEGER, parameter [ind\\_LHC4ACCHO](#) = 0
- INTEGER, parameter [ind\\_LHC4ACCO2H](#) = 0
- INTEGER, parameter [ind\\_LHC4ACCO3H](#) = 0
- INTEGER, parameter [ind\\_LISOPACO2](#) = 0
- INTEGER, parameter [ind\\_LC578O2](#) = 0
- INTEGER, parameter [ind\\_LISOPACOOH](#) = 0
- INTEGER, parameter [ind\\_LC578OOH](#) = 0
- INTEGER, parameter [ind\\_LC5PAN1719](#) = 0
- INTEGER, parameter [ind\\_LISOPACNO3](#) = 0
- INTEGER, parameter [ind\\_LNISO3](#) = 0
- INTEGER, parameter [ind\\_LNISOOH](#) = 0
- INTEGER, parameter [ind\\_CO235C5CHO](#) = 0
- INTEGER, parameter [ind\\_CO235C6O2](#) = 0
- INTEGER, parameter [ind\\_C614CO](#) = 0
- INTEGER, parameter [ind\\_CO235C6OOH](#) = 0
- INTEGER, parameter [ind\\_C614O2](#) = 0
- INTEGER, parameter [ind\\_C614OOH](#) = 0
- INTEGER, parameter [ind\\_C614NO3](#) = 0
- INTEGER, parameter [ind\\_CO235C6CO3](#) = 0
- INTEGER, parameter [ind\\_CO235C6CHO](#) = 0
- INTEGER, parameter [ind\\_C235C6CO3H](#) = 0
- INTEGER, parameter [ind\\_C716O2](#) = 0
- INTEGER, parameter [ind\\_C716OOH](#) = 0
- INTEGER, parameter [ind\\_ROO6R4P](#) = 0
- INTEGER, parameter [ind\\_ROO6R5P](#) = 0
- INTEGER, parameter [ind\\_ROO6R3O](#) = 0
- INTEGER, parameter [ind\\_C721O2](#) = 0
- INTEGER, parameter [ind\\_C722O2](#) = 0
- INTEGER, parameter [ind\\_ROO6R3O2](#) = 0
- INTEGER, parameter [ind\\_ROO6R5O2](#) = 0
- INTEGER, parameter [ind\\_C721OOH](#) = 0
- INTEGER, parameter [ind\\_C722OOH](#) = 0
- INTEGER, parameter [ind\\_ROO6R3OOH](#) = 0
- INTEGER, parameter [ind\\_C7PAN3](#) = 0
- INTEGER, parameter [ind\\_ROO6R3NO3](#) = 0
- INTEGER, parameter [ind\\_C8BCO2](#) = 0
- INTEGER, parameter [ind\\_C721CO3](#) = 0
- INTEGER, parameter [ind\\_C8BCCO](#) = 0
- INTEGER, parameter [ind\\_C8BCOOH](#) = 0
- INTEGER, parameter [ind\\_C721CHO](#) = 0
- INTEGER, parameter [ind\\_NORPINIC](#) = 0
- INTEGER, parameter [ind\\_C721CO3H](#) = 0

- INTEGER, parameter [ind\\_C85O2](#) = 0
- INTEGER, parameter [ind\\_C89O2](#) = 0
- INTEGER, parameter [ind\\_C811O2](#) = 0
- INTEGER, parameter [ind\\_C86O2](#) = 0
- INTEGER, parameter [ind\\_C812O2](#) = 0
- INTEGER, parameter [ind\\_C813O2](#) = 0
- INTEGER, parameter [ind\\_C8BC](#) = 0
- INTEGER, parameter [ind\\_C85OOH](#) = 0
- INTEGER, parameter [ind\\_C811OOH](#) = 0
- INTEGER, parameter [ind\\_C86OOH](#) = 0
- INTEGER, parameter [ind\\_C812OOH](#) = 0
- INTEGER, parameter [ind\\_C813OOH](#) = 0
- INTEGER, parameter [ind\\_C89OOH](#) = 0
- INTEGER, parameter [ind\\_C810OOH](#) = 0
- INTEGER, parameter [ind\\_C810O2](#) = 0
- INTEGER, parameter [ind\\_C8BCNO3](#) = 0
- INTEGER, parameter [ind\\_C721PAN](#) = 0
- INTEGER, parameter [ind\\_C89NO3](#) = 0
- INTEGER, parameter [ind\\_C810NO3](#) = 0
- INTEGER, parameter [ind\\_C85CO3](#) = 0
- INTEGER, parameter [ind\\_NOPINDCO](#) = 0
- INTEGER, parameter [ind\\_C85CO3H](#) = 0
- INTEGER, parameter [ind\\_NOPINDO2](#) = 0
- INTEGER, parameter [ind\\_C89CO3](#) = 0
- INTEGER, parameter [ind\\_C811CO3](#) = 0
- INTEGER, parameter [ind\\_NOPINONE](#) = 0
- INTEGER, parameter [ind\\_NOPINOO](#) = 0
- INTEGER, parameter [ind\\_NORPINAL](#) = 0
- INTEGER, parameter [ind\\_C89CO2H](#) = 0
- INTEGER, parameter [ind\\_NOPINDOOH](#) = 0
- INTEGER, parameter [ind\\_RO6R3P](#) = 0
- INTEGER, parameter [ind\\_C89CO3H](#) = 0
- INTEGER, parameter [ind\\_PINIC](#) = 0
- INTEGER, parameter [ind\\_C811CO3H](#) = 0
- INTEGER, parameter [ind\\_C96O2](#) = 0
- INTEGER, parameter [ind\\_C97O2](#) = 0
- INTEGER, parameter [ind\\_C98O2](#) = 0
- INTEGER, parameter [ind\\_C96OOH](#) = 0
- INTEGER, parameter [ind\\_C97OOH](#) = 0
- INTEGER, parameter [ind\\_C98OOH](#) = 0
- INTEGER, parameter [ind\\_C89PAN](#) = 0
- INTEGER, parameter [ind\\_C9PAN2](#) = 0
- INTEGER, parameter [ind\\_C811PAN](#) = 0
- INTEGER, parameter [ind\\_C96NO3](#) = 0
- INTEGER, parameter [ind\\_C98NO3](#) = 0
- INTEGER, parameter [ind\\_C109CO](#) = 0

- INTEGER, parameter `ind_PINALO2` = 0
- INTEGER, parameter `ind_PINALOOH` = 0
- INTEGER, parameter `ind_C109O2` = 0
- INTEGER, parameter `ind_C96CO3` = 0
- INTEGER, parameter `ind_C106O2` = 0
- INTEGER, parameter `ind_APINENE` = 0
- INTEGER, parameter `ind_BPINENE` = 0
- INTEGER, parameter `ind_PINAL` = 0
- INTEGER, parameter `ind_APINAOO` = 0
- INTEGER, parameter `ind_APINBOO` = 0
- INTEGER, parameter `ind_MENTHEN6ONE` = 0
- INTEGER, parameter `ind_PINONIC` = 0
- INTEGER, parameter `ind_C109OOH` = 0
- INTEGER, parameter `ind_PERPINONIC` = 0
- INTEGER, parameter `ind_C106OOH` = 0
- INTEGER, parameter `ind_BPINAO2` = 0
- INTEGER, parameter `ind_OH2MENTHEN6ONE` = 0
- INTEGER, parameter `ind_RO6R1O2` = 0
- INTEGER, parameter `ind_ROO6R1O2` = 0
- INTEGER, parameter `ind_RO6R3O2` = 0
- INTEGER, parameter `ind_OHMENTHEN6ONEO2` = 0
- INTEGER, parameter `ind_BPINAOOH` = 0
- INTEGER, parameter `ind_RO6R1OOH` = 0
- INTEGER, parameter `ind_RO6R3OOH` = 0
- INTEGER, parameter `ind_ROO6R1OOH` = 0
- INTEGER, parameter `ind_PINALNO3` = 0
- INTEGER, parameter `ind_C10PAN2` = 0
- INTEGER, parameter `ind_C106NO3` = 0
- INTEGER, parameter `ind_BPINANO3` = 0
- INTEGER, parameter `ind_RO6R1NO3` = 0
- INTEGER, parameter `ind_RO6R3NO3` = 0
- INTEGER, parameter `ind_ROO6R1NO3` = 0
- INTEGER, parameter `ind_LAPINABO2` = 0
- INTEGER, parameter `ind_LAPINABOOH` = 0
- INTEGER, parameter `ind_LNAPINABO2` = 0
- INTEGER, parameter `ind_LNBPINABO2` = 0
- INTEGER, parameter `ind_LAPINABNO3` = 0
- INTEGER, parameter `ind_LNAPINABOOH` = 0
- INTEGER, parameter `ind_LNBPINABOOH` = 0
- INTEGER, parameter `ind_Cl` = 0
- INTEGER, parameter `ind_Cl2` = 0
- INTEGER, parameter `ind_CIO` = 0
- INTEGER, parameter `ind_HCl` = 0
- INTEGER, parameter `ind_HOCl` = 0
- INTEGER, parameter `ind_Cl2O2` = 0
- INTEGER, parameter `ind_OCIO` = 0

- INTEGER, parameter [ind\\_CINO2](#) = 0
- INTEGER, parameter [ind\\_CINO3](#) = 0
- INTEGER, parameter [ind\\_CCl4](#) = 0
- INTEGER, parameter [ind\\_CH3Cl](#) = 0
- INTEGER, parameter [ind\\_CH3CCl3](#) = 0
- INTEGER, parameter [ind\\_CF2Cl2](#) = 0
- INTEGER, parameter [ind\\_CFCI3](#) = 0
- INTEGER, parameter [ind\\_Br](#) = 0
- INTEGER, parameter [ind\\_Br2](#) = 0
- INTEGER, parameter [ind\\_BrO](#) = 0
- INTEGER, parameter [ind\\_HBr](#) = 0
- INTEGER, parameter [ind\\_HOBr](#) = 0
- INTEGER, parameter [ind\\_BrNO2](#) = 0
- INTEGER, parameter [ind\\_BrNO3](#) = 0
- INTEGER, parameter [ind\\_BrCl](#) = 0
- INTEGER, parameter [ind\\_CH3Br](#) = 0
- INTEGER, parameter [ind\\_CF3Br](#) = 0
- INTEGER, parameter [ind\\_CF2ClBr](#) = 0
- INTEGER, parameter [ind\\_CHCl2Br](#) = 0
- INTEGER, parameter [ind\\_CHClBr2](#) = 0
- INTEGER, parameter [ind\\_CH2ClBr](#) = 0
- INTEGER, parameter [ind\\_CH2Br2](#) = 0
- INTEGER, parameter [ind\\_CHBr3](#) = 0
- INTEGER, parameter [ind\\_I](#) = 0
- INTEGER, parameter [ind\\_I2](#) = 0
- INTEGER, parameter [ind\\_IO](#) = 0
- INTEGER, parameter [ind\\_OIO](#) = 0
- INTEGER, parameter [ind\\_I2O2](#) = 0
- INTEGER, parameter [ind\\_HI](#) = 0
- INTEGER, parameter [ind\\_HOI](#) = 0
- INTEGER, parameter [ind\\_HIO3](#) = 0
- INTEGER, parameter [ind\\_INO2](#) = 0
- INTEGER, parameter [ind\\_INO3](#) = 0
- INTEGER, parameter [ind\\_CH3I](#) = 0
- INTEGER, parameter [ind\\_CH2I2](#) = 0
- INTEGER, parameter [ind\\_C3H7I](#) = 0
- INTEGER, parameter [ind\\_ICl](#) = 0
- INTEGER, parameter [ind\\_CH2ClI](#) = 0
- INTEGER, parameter [ind\\_IBr](#) = 0
- INTEGER, parameter [ind\\_S](#) = 0
- INTEGER, parameter [ind\\_SO](#) = 0
- INTEGER, parameter [ind\\_SO2](#) = 0
- INTEGER, parameter [ind\\_SO3](#) = 0
- INTEGER, parameter [ind\\_SH](#) = 0
- INTEGER, parameter [ind\\_H2SO4](#) = 0
- INTEGER, parameter [ind\\_CH3SO3H](#) = 0

- INTEGER, parameter `ind_DMS` = 0
- INTEGER, parameter `ind_DMSO` = 0
- INTEGER, parameter `ind_CH3SO2` = 0
- INTEGER, parameter `ind_CH3SO3` = 0
- INTEGER, parameter `ind_OCS` = 0
- INTEGER, parameter `ind_SF6` = 0
- INTEGER, parameter `ind_Hg` = 0
- INTEGER, parameter `ind_HgO` = 0
- INTEGER, parameter `ind_HgCl` = 0
- INTEGER, parameter `ind_HgCl2` = 0
- INTEGER, parameter `ind_HgBr` = 0
- INTEGER, parameter `ind_HgBr2` = 0
- INTEGER, parameter `ind_ClHgBr` = 0
- INTEGER, parameter `ind_BrHgOBr` = 0
- INTEGER, parameter `ind_ClHgOBr` = 0
- INTEGER, parameter `ind_NO3m_cs` = 0
- INTEGER, parameter `ind_Hp_cs` = 0
- INTEGER, parameter `ind_RGM_cs` = 0
- INTEGER, parameter `ind_IPART` = 0
- INTEGER, parameter `ind_Dummy` = 0
- INTEGER, parameter `ind_O3s` = 0
- INTEGER, parameter `ind_LO3s` = 0
- INTEGER, parameter `ind_LHOC3H6O2` = 0
- INTEGER, parameter `ind_LHOC3H6OOH` = 0
- INTEGER, parameter `ind_ISO2` = 0
- INTEGER, parameter `ind_ISON` = 0
- INTEGER, parameter `ind_ISO2H` = 0
- INTEGER, parameter `ind_MVKO2` = 0
- INTEGER, parameter `ind_MVKOOH` = 0
- INTEGER, parameter `ind_NACA` = 0
- INTEGER, parameter `ind_Op` = 0
- INTEGER, parameter `ind_O2p` = 0
- INTEGER, parameter `ind_Np` = 0
- INTEGER, parameter `ind_N2p` = 0
- INTEGER, parameter `ind_NOP` = 0
- INTEGER, parameter `ind_Hp` = 0
- INTEGER, parameter `ind_em` = 0
- INTEGER, parameter `ind_kJmol` = 0
- INTEGER, parameter `ind_RH2O` = 0
- INTEGER, parameter `ind_RNOy` = 0
- INTEGER, parameter `ind_RCly` = 0
- INTEGER, parameter `ind_RBr` = 0
- INTEGER, parameter `ind_CFCI3_c` = 0
- INTEGER, parameter `ind_CF2CI2_c` = 0
- INTEGER, parameter `ind_N2O_c` = 0
- INTEGER, parameter `ind_CH3CCI3_c` = 0

- INTEGER, parameter [ind\\_CF2ClBr\\_c](#) = 0
- INTEGER, parameter [ind\\_CF3Br\\_c](#) = 0
- INTEGER, parameter [ind\\_O2\\_a01](#) = 0
- INTEGER, parameter [ind\\_O3\\_a01](#) = 0
- INTEGER, parameter [ind\\_OH\\_a01](#) = 0
- INTEGER, parameter [ind\\_HO2\\_a01](#) = 0
- INTEGER, parameter [ind\\_H2O\\_a01](#) = 0
- INTEGER, parameter [ind\\_H2O2\\_a01](#) = 0
- INTEGER, parameter [ind\\_NH3\\_a01](#) = 0
- INTEGER, parameter [ind\\_NO\\_a01](#) = 0
- INTEGER, parameter [ind\\_NO2\\_a01](#) = 0
- INTEGER, parameter [ind\\_NO3\\_a01](#) = 0
- INTEGER, parameter [ind\\_HONO\\_a01](#) = 0
- INTEGER, parameter [ind\\_HNO3\\_a01](#) = 0
- INTEGER, parameter [ind\\_HNO4\\_a01](#) = 0
- INTEGER, parameter [ind\\_N2O5\\_a01](#) = 0
- INTEGER, parameter [ind\\_CH3OH\\_a01](#) = 0
- INTEGER, parameter [ind\\_HCOOH\\_a01](#) = 0
- INTEGER, parameter [ind\\_HCHO\\_a01](#) = 0
- INTEGER, parameter [ind\\_CH3O2\\_a01](#) = 0
- INTEGER, parameter [ind\\_CH3OOH\\_a01](#) = 0
- INTEGER, parameter [ind\\_CO2\\_a01](#) = 0
- INTEGER, parameter [ind\\_CH3CO2H\\_a01](#) = 0
- INTEGER, parameter [ind\\_PAN\\_a01](#) = 0
- INTEGER, parameter [ind\\_C2H5O2\\_a01](#) = 0
- INTEGER, parameter [ind\\_CH3CHO\\_a01](#) = 0
- INTEGER, parameter [ind\\_CH3COCH3\\_a01](#) = 0
- INTEGER, parameter [ind\\_Cl\\_a01](#) = 0
- INTEGER, parameter [ind\\_Cl2\\_a01](#) = 0
- INTEGER, parameter [ind\\_HCl\\_a01](#) = 0
- INTEGER, parameter [ind\\_HOCl\\_a01](#) = 0
- INTEGER, parameter [ind\\_Br\\_a01](#) = 0
- INTEGER, parameter [ind\\_Br2\\_a01](#) = 0
- INTEGER, parameter [ind\\_HBr\\_a01](#) = 0
- INTEGER, parameter [ind\\_HOBr\\_a01](#) = 0
- INTEGER, parameter [ind\\_BrCl\\_a01](#) = 0
- INTEGER, parameter [ind\\_I2\\_a01](#) = 0
- INTEGER, parameter [ind\\_IO\\_a01](#) = 0
- INTEGER, parameter [ind\\_HI\\_a01](#) = 0
- INTEGER, parameter [ind\\_HOI\\_a01](#) = 0
- INTEGER, parameter [ind\\_ICl\\_a01](#) = 0
- INTEGER, parameter [ind\\_IBr\\_a01](#) = 0
- INTEGER, parameter [ind\\_HIO3\\_a01](#) = 0
- INTEGER, parameter [ind\\_SO2\\_a01](#) = 0
- INTEGER, parameter [ind\\_H2SO4\\_a01](#) = 0
- INTEGER, parameter [ind\\_DMS\\_a01](#) = 0

- INTEGER, parameter `ind_DMSO_a01` = 0
- INTEGER, parameter `ind_Hg_a01` = 0
- INTEGER, parameter `ind_HgO_a01` = 0
- INTEGER, parameter `ind_HgOH_a01` = 0
- INTEGER, parameter `ind_HgOHOH_a01` = 0
- INTEGER, parameter `ind_HgOHCl_a01` = 0
- INTEGER, parameter `ind_HgCl2_a01` = 0
- INTEGER, parameter `ind_HgBr2_a01` = 0
- INTEGER, parameter `ind_HgSO3_a01` = 0
- INTEGER, parameter `ind_ClHgBr_a01` = 0
- INTEGER, parameter `ind_BrHgOBr_a01` = 0
- INTEGER, parameter `ind_ClHgOBr_a01` = 0
- INTEGER, parameter `ind_O2m_a01` = 0
- INTEGER, parameter `ind_OHm_a01` = 0
- INTEGER, parameter `ind_Hp_a01` = 0
- INTEGER, parameter `ind_NH4p_a01` = 0
- INTEGER, parameter `ind_NO2m_a01` = 0
- INTEGER, parameter `ind_NO3m_a01` = 0
- INTEGER, parameter `ind_NO4m_a01` = 0
- INTEGER, parameter `ind_CO3m_a01` = 0
- INTEGER, parameter `ind_HCOOm_a01` = 0
- INTEGER, parameter `ind_HCO3m_a01` = 0
- INTEGER, parameter `ind_CH3COOm_a01` = 0
- INTEGER, parameter `ind_Clm_a01` = 0
- INTEGER, parameter `ind_Cl2m_a01` = 0
- INTEGER, parameter `ind_ClOm_a01` = 0
- INTEGER, parameter `ind_ClOHm_a01` = 0
- INTEGER, parameter `ind_Brm_a01` = 0
- INTEGER, parameter `ind_Br2m_a01` = 0
- INTEGER, parameter `ind_BrOm_a01` = 0
- INTEGER, parameter `ind_BrOHm_a01` = 0
- INTEGER, parameter `ind_BrCl2m_a01` = 0
- INTEGER, parameter `ind_Br2Clm_a01` = 0
- INTEGER, parameter `ind_Im_a01` = 0
- INTEGER, parameter `ind_IO2m_a01` = 0
- INTEGER, parameter `ind_IO3m_a01` = 0
- INTEGER, parameter `ind_ICl2m_a01` = 0
- INTEGER, parameter `ind_IClBrm_a01` = 0
- INTEGER, parameter `ind_IBr2m_a01` = 0
- INTEGER, parameter `ind_SO3m_a01` = 0
- INTEGER, parameter `ind_SO3mm_a01` = 0
- INTEGER, parameter `ind_SO4m_a01` = 0
- INTEGER, parameter `ind_SO4mm_a01` = 0
- INTEGER, parameter `ind_SO5m_a01` = 0
- INTEGER, parameter `ind_HSO3m_a01` = 0
- INTEGER, parameter `ind_HSO4m_a01` = 0

- INTEGER, parameter [ind\\_HSO5m\\_a01](#) = 0
- INTEGER, parameter [ind\\_CH3SO3m\\_a01](#) = 0
- INTEGER, parameter [ind\\_CH2OHSO3m\\_a01](#) = 0
- INTEGER, parameter [ind\\_Hgp\\_a01](#) = 0
- INTEGER, parameter [ind\\_Hgpp\\_a01](#) = 0
- INTEGER, parameter [ind\\_HgOHp\\_a01](#) = 0
- INTEGER, parameter [ind\\_HgClp\\_a01](#) = 0
- INTEGER, parameter [ind\\_HgCl3m\\_a01](#) = 0
- INTEGER, parameter [ind\\_HgCl4mm\\_a01](#) = 0
- INTEGER, parameter [ind\\_HgBrp\\_a01](#) = 0
- INTEGER, parameter [ind\\_HgBr3m\\_a01](#) = 0
- INTEGER, parameter [ind\\_HgBr4mm\\_a01](#) = 0
- INTEGER, parameter [ind\\_HgSO32mm\\_a01](#) = 0
- INTEGER, parameter [ind\\_D1O\\_a01](#) = 0
- INTEGER, parameter [ind\\_D2O\\_a01](#) = 0
- INTEGER, parameter [ind\\_DAHp\\_a01](#) = 0
- INTEGER, parameter [ind\\_DA\\_a01](#) = 0
- INTEGER, parameter [ind\\_DAm\\_a01](#) = 0
- INTEGER, parameter [ind\\_DGtAi\\_a01](#) = 0
- INTEGER, parameter [ind\\_DGtAs\\_a01](#) = 0
- INTEGER, parameter [ind\\_PROD1\\_a01](#) = 0
- INTEGER, parameter [ind\\_PROD2\\_a01](#) = 0
- INTEGER, parameter [ind\\_Nap\\_a01](#) = 0
- INTEGER, parameter [indf\\_O2](#) = 1
- INTEGER, parameter [indf\\_N2](#) = 2
- INTEGER, parameter [indf\\_CO2](#) = 3

#### 5.49.1 Member Data Documentation

- 5.49.1.1 INTEGER, parameter [messy\\_mecca\\_kpp\\_Parameters::CNVAR](#) = 43
- 5.49.1.2 INTEGER, parameter [messy\\_mecca\\_kpp\\_Parameters::ind\\_ACETOL](#) = 0
- 5.49.1.3 INTEGER, parameter [messy\\_mecca\\_kpp\\_Parameters::ind\\_ALCOCH2OOH](#) = 0
- 5.49.1.4 INTEGER, parameter [messy\\_mecca\\_kpp\\_Parameters::ind\\_APINAOO](#) = 0
- 5.49.1.5 INTEGER, parameter [messy\\_mecca\\_kpp\\_Parameters::ind\\_APINBOO](#) = 0
- 5.49.1.6 INTEGER, parameter [messy\\_mecca\\_kpp\\_Parameters::ind\\_APINENE](#) = 0
- 5.49.1.7 INTEGER, parameter [messy\\_mecca\\_kpp\\_Parameters::ind\\_BIACET](#) = 0
- 5.49.1.8 INTEGER, parameter [messy\\_mecca\\_kpp\\_Parameters::ind\\_BIACETO2](#) = 0



- 5.49.1.9 INTEGER, parameter messy\_mecca\_kpp\_Parameters::ind\_BIACETOH = 0
- 5.49.1.10 INTEGER, parameter messy\_mecca\_kpp\_Parameters::ind\_BIACETOOH = 0
- 5.49.1.11 INTEGER, parameter messy\_mecca\_kpp\_Parameters::ind\_BPINANO3 = 0
- 5.49.1.12 INTEGER, parameter messy\_mecca\_kpp\_Parameters::ind\_BPINAO2 = 0
- 5.49.1.13 INTEGER, parameter messy\_mecca\_kpp\_Parameters::ind\_BPINAOOH = 0
- 5.49.1.14 INTEGER, parameter messy\_mecca\_kpp\_Parameters::ind\_BPINENE = 0
- 5.49.1.15 INTEGER, parameter messy\_mecca\_kpp\_Parameters::ind\_Br = 0
- 5.49.1.16 INTEGER, parameter messy\_mecca\_kpp\_Parameters::ind\_Br2 = 0
- 5.49.1.17 INTEGER, parameter messy\_mecca\_kpp\_Parameters::ind\_Br2\_a01 = 0
- 5.49.1.18 INTEGER, parameter messy\_mecca\_kpp\_Parameters::ind\_Br2Clm\_a01 = 0
- 5.49.1.19 INTEGER, parameter messy\_mecca\_kpp\_Parameters::ind\_Br2m\_a01 = 0
- 5.49.1.20 INTEGER, parameter messy\_mecca\_kpp\_Parameters::ind\_Br\_a01 = 0
- 5.49.1.21 INTEGER, parameter messy\_mecca\_kpp\_Parameters::ind\_BrCl = 0
- 5.49.1.22 INTEGER, parameter messy\_mecca\_kpp\_Parameters::ind\_BrCl2m\_a01 = 0
- 5.49.1.23 INTEGER, parameter messy\_mecca\_kpp\_Parameters::ind\_BrCl\_a01 = 0
- 5.49.1.24 INTEGER, parameter messy\_mecca\_kpp\_Parameters::ind\_BrHgOBr = 0
- 5.49.1.25 INTEGER, parameter messy\_mecca\_kpp\_Parameters::ind\_BrHgOBr\_a01 = 0
- 5.49.1.26 INTEGER, parameter messy\_mecca\_kpp\_Parameters::ind\_Brm\_a01 = 0
- 5.49.1.27 INTEGER, parameter messy\_mecca\_kpp\_Parameters::ind\_BrNO2 = 0
- 5.49.1.28 INTEGER, parameter messy\_mecca\_kpp\_Parameters::ind\_BrNO3 = 0
- 5.49.1.29 INTEGER, parameter messy\_mecca\_kpp\_Parameters::ind\_BrO = 0
- 5.49.1.30 INTEGER, parameter messy\_mecca\_kpp\_Parameters::ind\_BrOHm\_a01 = 0
- 5.49.1.31 INTEGER, parameter messy\_mecca\_kpp\_Parameters::ind\_BrOm\_a01 = 0

- 5.49.1.32 INTEGER, parameter messy\_mecca\_kpp\_Parameters::ind\_C106NO3 = 0
- 5.49.1.33 INTEGER, parameter messy\_mecca\_kpp\_Parameters::ind\_C106O2 = 0
- 5.49.1.34 INTEGER, parameter messy\_mecca\_kpp\_Parameters::ind\_C106OOH = 0
- 5.49.1.35 INTEGER, parameter messy\_mecca\_kpp\_Parameters::ind\_C109CO = 0
- 5.49.1.36 INTEGER, parameter messy\_mecca\_kpp\_Parameters::ind\_C109O2 = 0
- 5.49.1.37 INTEGER, parameter messy\_mecca\_kpp\_Parameters::ind\_C109OOH = 0
- 5.49.1.38 INTEGER, parameter messy\_mecca\_kpp\_Parameters::ind\_C10PAN2 = 0
- 5.49.1.39 INTEGER, parameter messy\_mecca\_kpp\_Parameters::ind\_C235C6CO3H = 0
- 5.49.1.40 INTEGER, parameter messy\_mecca\_kpp\_Parameters::ind\_C2H2 = 0
- 5.49.1.41 INTEGER, parameter messy\_mecca\_kpp\_Parameters::ind\_C2H4 = 0
- 5.49.1.42 INTEGER, parameter messy\_mecca\_kpp\_Parameters::ind\_C2H5O2 = 0
- 5.49.1.43 INTEGER, parameter messy\_mecca\_kpp\_Parameters::ind\_C2H5O2\_a01 = 0
- 5.49.1.44 INTEGER, parameter messy\_mecca\_kpp\_Parameters::ind\_C2H5OOH = 0
- 5.49.1.45 INTEGER, parameter messy\_mecca\_kpp\_Parameters::ind\_C2H6 = 0
- 5.49.1.46 INTEGER, parameter messy\_mecca\_kpp\_Parameters::ind\_C312COCO3 = 0
- 5.49.1.47 INTEGER, parameter messy\_mecca\_kpp\_Parameters::ind\_C312COCO3H = 0
- 5.49.1.48 INTEGER, parameter messy\_mecca\_kpp\_Parameters::ind\_C312COPAN = 0
- 5.49.1.49 INTEGER, parameter messy\_mecca\_kpp\_Parameters::ind\_C33CO = 0
- 5.49.1.50 INTEGER, parameter messy\_mecca\_kpp\_Parameters::ind\_C3H6 = 0
- 5.49.1.51 INTEGER, parameter messy\_mecca\_kpp\_Parameters::ind\_C3H7I = 0
- 5.49.1.52 INTEGER, parameter messy\_mecca\_kpp\_Parameters::ind\_C3H8 = 0
- 5.49.1.53 INTEGER, parameter messy\_mecca\_kpp\_Parameters::ind\_C3PAN1 = 0
- 5.49.1.54 INTEGER, parameter messy\_mecca\_kpp\_Parameters::ind\_C3PAN2 = 0

- 5.49.1.55 INTEGER, parameter messy\_mecca\_kpp\_Parameters::ind\_C413COOOH = 0
- 5.49.1.56 INTEGER, parameter messy\_mecca\_kpp\_Parameters::ind\_C44O2 = 0
- 5.49.1.57 INTEGER, parameter messy\_mecca\_kpp\_Parameters::ind\_C44OOH = 0
- 5.49.1.58 INTEGER, parameter messy\_mecca\_kpp\_Parameters::ind\_C4CODIAL = 0
- 5.49.1.59 INTEGER, parameter messy\_mecca\_kpp\_Parameters::ind\_C511O2 = 0
- 5.49.1.60 INTEGER, parameter messy\_mecca\_kpp\_Parameters::ind\_C511OOH = 0
- 5.49.1.61 INTEGER, parameter messy\_mecca\_kpp\_Parameters::ind\_C512O2 = 0
- 5.49.1.62 INTEGER, parameter messy\_mecca\_kpp\_Parameters::ind\_C512OOH = 0
- 5.49.1.63 INTEGER, parameter messy\_mecca\_kpp\_Parameters::ind\_C513CO = 0
- 5.49.1.64 INTEGER, parameter messy\_mecca\_kpp\_Parameters::ind\_C513O2 = 0
- 5.49.1.65 INTEGER, parameter messy\_mecca\_kpp\_Parameters::ind\_C513OOH = 0
- 5.49.1.66 INTEGER, parameter messy\_mecca\_kpp\_Parameters::ind\_C514NO3 = 0
- 5.49.1.67 INTEGER, parameter messy\_mecca\_kpp\_Parameters::ind\_C514O2 = 0
- 5.49.1.68 INTEGER, parameter messy\_mecca\_kpp\_Parameters::ind\_C514OOH = 0
- 5.49.1.69 INTEGER, parameter messy\_mecca\_kpp\_Parameters::ind\_C59O2 = 0
- 5.49.1.70 INTEGER, parameter messy\_mecca\_kpp\_Parameters::ind\_C59OOH = 0
- 5.49.1.71 INTEGER, parameter messy\_mecca\_kpp\_Parameters::ind\_C5H8 = 0
- 5.49.1.72 INTEGER, parameter messy\_mecca\_kpp\_Parameters::ind\_C5PAN9 = 0
- 5.49.1.73 INTEGER, parameter messy\_mecca\_kpp\_Parameters::ind\_C614CO = 0
- 5.49.1.74 INTEGER, parameter messy\_mecca\_kpp\_Parameters::ind\_C614NO3 = 0
- 5.49.1.75 INTEGER, parameter messy\_mecca\_kpp\_Parameters::ind\_C614O2 = 0
- 5.49.1.76 INTEGER, parameter messy\_mecca\_kpp\_Parameters::ind\_C614OOH = 0
- 5.49.1.77 INTEGER, parameter messy\_mecca\_kpp\_Parameters::ind\_C716O2 = 0
- 5.49.1.78 INTEGER, parameter messy\_mecca\_kpp\_Parameters::ind\_C716OOH = 0

- 5.49.1.79 INTEGER, parameter messy\_mecca\_kpp\_Parameters::ind\_C721CHO = 0
- 5.49.1.80 INTEGER, parameter messy\_mecca\_kpp\_Parameters::ind\_C721CO3 = 0
- 5.49.1.81 INTEGER, parameter messy\_mecca\_kpp\_Parameters::ind\_C721CO3H = 0
- 5.49.1.82 INTEGER, parameter messy\_mecca\_kpp\_Parameters::ind\_C721O2 = 0
- 5.49.1.83 INTEGER, parameter messy\_mecca\_kpp\_Parameters::ind\_C721OOH = 0
- 5.49.1.84 INTEGER, parameter messy\_mecca\_kpp\_Parameters::ind\_C721PAN = 0
- 5.49.1.85 INTEGER, parameter messy\_mecca\_kpp\_Parameters::ind\_C722O2 = 0
- 5.49.1.86 INTEGER, parameter messy\_mecca\_kpp\_Parameters::ind\_C722OOH = 0
- 5.49.1.87 INTEGER, parameter messy\_mecca\_kpp\_Parameters::ind\_C7PAN3 = 0
- 5.49.1.88 INTEGER, parameter messy\_mecca\_kpp\_Parameters::ind\_C810NO3 = 0
- 5.49.1.89 INTEGER, parameter messy\_mecca\_kpp\_Parameters::ind\_C810O2 = 0
- 5.49.1.90 INTEGER, parameter messy\_mecca\_kpp\_Parameters::ind\_C810OOH = 0
- 5.49.1.91 INTEGER, parameter messy\_mecca\_kpp\_Parameters::ind\_C811CO3 = 0
- 5.49.1.92 INTEGER, parameter messy\_mecca\_kpp\_Parameters::ind\_C811CO3H = 0
- 5.49.1.93 INTEGER, parameter messy\_mecca\_kpp\_Parameters::ind\_C811O2 = 0
- 5.49.1.94 INTEGER, parameter messy\_mecca\_kpp\_Parameters::ind\_C811OOH = 0
- 5.49.1.95 INTEGER, parameter messy\_mecca\_kpp\_Parameters::ind\_C811PAN = 0
- 5.49.1.96 INTEGER, parameter messy\_mecca\_kpp\_Parameters::ind\_C812O2 = 0
- 5.49.1.97 INTEGER, parameter messy\_mecca\_kpp\_Parameters::ind\_C812OOH = 0
- 5.49.1.98 INTEGER, parameter messy\_mecca\_kpp\_Parameters::ind\_C813O2 = 0
- 5.49.1.99 INTEGER, parameter messy\_mecca\_kpp\_Parameters::ind\_C813OOH = 0
- 5.49.1.100 INTEGER, parameter messy\_mecca\_kpp\_Parameters::ind\_C85CO3 = 0
- 5.49.1.101 INTEGER, parameter messy\_mecca\_kpp\_Parameters::ind\_C85CO3H = 0
- 5.49.1.102 INTEGER, parameter messy\_mecca\_kpp\_Parameters::ind\_C85O2 = 0

- 5.49.1.103 INTEGER, parameter messy\_mecca\_kpp\_Parameters::ind\_C85OOH = 0
- 5.49.1.104 INTEGER, parameter messy\_mecca\_kpp\_Parameters::ind\_C86O2 = 0
- 5.49.1.105 INTEGER, parameter messy\_mecca\_kpp\_Parameters::ind\_C86OOH = 0
- 5.49.1.106 INTEGER, parameter messy\_mecca\_kpp\_Parameters::ind\_C89CO2H = 0
- 5.49.1.107 INTEGER, parameter messy\_mecca\_kpp\_Parameters::ind\_C89CO3 = 0
- 5.49.1.108 INTEGER, parameter messy\_mecca\_kpp\_Parameters::ind\_C89CO3H = 0
- 5.49.1.109 INTEGER, parameter messy\_mecca\_kpp\_Parameters::ind\_C89NO3 = 0
- 5.49.1.110 INTEGER, parameter messy\_mecca\_kpp\_Parameters::ind\_C89O2 = 0
- 5.49.1.111 INTEGER, parameter messy\_mecca\_kpp\_Parameters::ind\_C89OOH = 0
- 5.49.1.112 INTEGER, parameter messy\_mecca\_kpp\_Parameters::ind\_C89PAN = 0
- 5.49.1.113 INTEGER, parameter messy\_mecca\_kpp\_Parameters::ind\_C8BC = 0
- 5.49.1.114 INTEGER, parameter messy\_mecca\_kpp\_Parameters::ind\_C8BCCO = 0
- 5.49.1.115 INTEGER, parameter messy\_mecca\_kpp\_Parameters::ind\_C8BCNO3 = 0
- 5.49.1.116 INTEGER, parameter messy\_mecca\_kpp\_Parameters::ind\_C8BCO2 = 0
- 5.49.1.117 INTEGER, parameter messy\_mecca\_kpp\_Parameters::ind\_C8BCOOH = 0
- 5.49.1.118 INTEGER, parameter messy\_mecca\_kpp\_Parameters::ind\_C96CO3 = 0
- 5.49.1.119 INTEGER, parameter messy\_mecca\_kpp\_Parameters::ind\_C96NO3 = 0
- 5.49.1.120 INTEGER, parameter messy\_mecca\_kpp\_Parameters::ind\_C96O2 = 0
- 5.49.1.121 INTEGER, parameter messy\_mecca\_kpp\_Parameters::ind\_C96OOH = 0
- 5.49.1.122 INTEGER, parameter messy\_mecca\_kpp\_Parameters::ind\_C97O2 = 0
- 5.49.1.123 INTEGER, parameter messy\_mecca\_kpp\_Parameters::ind\_C97OOH = 0
- 5.49.1.124 INTEGER, parameter messy\_mecca\_kpp\_Parameters::ind\_C98NO3 = 0
- 5.49.1.125 INTEGER, parameter messy\_mecca\_kpp\_Parameters::ind\_C98O2 = 0
- 5.49.1.126 INTEGER, parameter messy\_mecca\_kpp\_Parameters::ind\_C98OOH = 0

- 5.49.1.127 INTEGER, parameter messy\_mecca\_kpp\_Parameters::ind\_C9PAN2 = 0
- 5.49.1.128 INTEGER, parameter messy\_mecca\_kpp\_Parameters::ind\_CCI4 = 0
- 5.49.1.129 INTEGER, parameter messy\_mecca\_kpp\_Parameters::ind\_CF2CI2 = 0
- 5.49.1.130 INTEGER, parameter messy\_mecca\_kpp\_Parameters::ind\_CF2CI2\_c = 0
- 5.49.1.131 INTEGER, parameter messy\_mecca\_kpp\_Parameters::ind\_CF2CIBr = 0
- 5.49.1.132 INTEGER, parameter messy\_mecca\_kpp\_Parameters::ind\_CF2CIBr\_c = 0
- 5.49.1.133 INTEGER, parameter messy\_mecca\_kpp\_Parameters::ind\_CF3Br = 0
- 5.49.1.134 INTEGER, parameter messy\_mecca\_kpp\_Parameters::ind\_CF3Br\_c = 0
- 5.49.1.135 INTEGER, parameter messy\_mecca\_kpp\_Parameters::ind\_CFCI3 = 0
- 5.49.1.136 INTEGER, parameter messy\_mecca\_kpp\_Parameters::ind\_CFCI3\_c = 0
- 5.49.1.137 INTEGER, parameter messy\_mecca\_kpp\_Parameters::ind\_CH2Br2 = 0
- 5.49.1.138 INTEGER, parameter messy\_mecca\_kpp\_Parameters::ind\_CH2CIBr = 0
- 5.49.1.139 INTEGER, parameter messy\_mecca\_kpp\_Parameters::ind\_CH2CI = 0
- 5.49.1.140 INTEGER, parameter messy\_mecca\_kpp\_Parameters::ind\_CH2I2 = 0
- 5.49.1.141 INTEGER, parameter messy\_mecca\_kpp\_Parameters::ind\_CH2OHSO3m\_a01 = 0
- 5.49.1.142 INTEGER, parameter messy\_mecca\_kpp\_Parameters::ind\_CH2OO = 39
- 5.49.1.143 INTEGER, parameter messy\_mecca\_kpp\_Parameters::ind\_CH3 = 28
- 5.49.1.144 INTEGER, parameter messy\_mecca\_kpp\_Parameters::ind\_CH3Br = 0
- 5.49.1.145 INTEGER, parameter messy\_mecca\_kpp\_Parameters::ind\_CH3CCI3 = 0
- 5.49.1.146 INTEGER, parameter messy\_mecca\_kpp\_Parameters::ind\_CH3CCI3\_c = 0
- 5.49.1.147 INTEGER, parameter messy\_mecca\_kpp\_Parameters::ind\_CH3CHO = 0
- 5.49.1.148 INTEGER, parameter messy\_mecca\_kpp\_Parameters::ind\_CH3CHO\_a01 = 0
- 5.49.1.149 INTEGER, parameter messy\_mecca\_kpp\_Parameters::ind\_CH3CI = 0

- 5.49.1.150 INTEGER, parameter messy\_mecca\_kpp\_Parameters::ind\_CH3CO2H = 0
- 5.49.1.151 INTEGER, parameter messy\_mecca\_kpp\_Parameters::ind\_CH3CO2H\_a01 = 0
- 5.49.1.152 INTEGER, parameter messy\_mecca\_kpp\_Parameters::ind\_CH3CO3 = 0
- 5.49.1.153 INTEGER, parameter messy\_mecca\_kpp\_Parameters::ind\_CH3CO3H = 0
- 5.49.1.154 INTEGER, parameter messy\_mecca\_kpp\_Parameters::ind\_CH3COCH2O2 = 0
- 5.49.1.155 INTEGER, parameter messy\_mecca\_kpp\_Parameters::ind\_CH3COCH3 = 0
- 5.49.1.156 INTEGER, parameter messy\_mecca\_kpp\_Parameters::ind\_CH3COCH3\_a01 = 0
- 5.49.1.157 INTEGER, parameter messy\_mecca\_kpp\_Parameters::ind\_CH3COOm\_a01 = 0
- 5.49.1.158 INTEGER, parameter messy\_mecca\_kpp\_Parameters::ind\_CH3I = 0
- 5.49.1.159 INTEGER, parameter messy\_mecca\_kpp\_Parameters::ind\_CH3NO3 = 24
- 5.49.1.160 INTEGER, parameter messy\_mecca\_kpp\_Parameters::ind\_CH3O = 37
- 5.49.1.161 INTEGER, parameter messy\_mecca\_kpp\_Parameters::ind\_CH3O2 = 42
- 5.49.1.162 INTEGER, parameter messy\_mecca\_kpp\_Parameters::ind\_CH3O2\_a01 = 0
- 5.49.1.163 INTEGER, parameter messy\_mecca\_kpp\_Parameters::ind\_CH3O2NO2 = 20
- 5.49.1.164 INTEGER, parameter messy\_mecca\_kpp\_Parameters::ind\_CH3OH = 18
- 5.49.1.165 INTEGER, parameter messy\_mecca\_kpp\_Parameters::ind\_CH3OH\_a01 = 0
- 5.49.1.166 INTEGER, parameter messy\_mecca\_kpp\_Parameters::ind\_CH3ONO = 16
- 5.49.1.167 INTEGER, parameter messy\_mecca\_kpp\_Parameters::ind\_CH3OOH = 15
- 5.49.1.168 INTEGER, parameter messy\_mecca\_kpp\_Parameters::ind\_CH3OOH\_a01 = 0
- 5.49.1.169 INTEGER, parameter messy\_mecca\_kpp\_Parameters::ind\_CH3SO2 = 0
- 5.49.1.170 INTEGER, parameter messy\_mecca\_kpp\_Parameters::ind\_CH3SO3 = 0

- 5.49.1.171 INTEGER, parameter messy\_mecca\_kpp\_Parameters::ind\_CH3SO3H = 0
- 5.49.1.172 INTEGER, parameter messy\_mecca\_kpp\_Parameters::ind\_CH3SO3m\_a01 = 0
- 5.49.1.173 INTEGER, parameter messy\_mecca\_kpp\_Parameters::ind\_CH4 = 4
- 5.49.1.174 INTEGER, parameter messy\_mecca\_kpp\_Parameters::ind\_CHBr3 = 0
- 5.49.1.175 INTEGER, parameter messy\_mecca\_kpp\_Parameters::ind\_CHCl2Br = 0
- 5.49.1.176 INTEGER, parameter messy\_mecca\_kpp\_Parameters::ind\_CHClBr2 = 0
- 5.49.1.177 INTEGER, parameter messy\_mecca\_kpp\_Parameters::ind\_CHOC3COCO3 = 0
- 5.49.1.178 INTEGER, parameter messy\_mecca\_kpp\_Parameters::ind\_CHOC3COO2 = 0
- 5.49.1.179 INTEGER, parameter messy\_mecca\_kpp\_Parameters::ind\_CHOC3COOOH = 0
- 5.49.1.180 INTEGER, parameter messy\_mecca\_kpp\_Parameters::ind\_CHOC3COPAN = 0
- 5.49.1.181 INTEGER, parameter messy\_mecca\_kpp\_Parameters::ind\_CHOCOCH2O2 = 0
- 5.49.1.182 INTEGER, parameter messy\_mecca\_kpp\_Parameters::ind\_CHOOCHO = 0
- 5.49.1.183 INTEGER, parameter messy\_mecca\_kpp\_Parameters::ind\_Cl = 0
- 5.49.1.184 INTEGER, parameter messy\_mecca\_kpp\_Parameters::ind\_Cl2 = 0
- 5.49.1.185 INTEGER, parameter messy\_mecca\_kpp\_Parameters::ind\_Cl2\_a01 = 0
- 5.49.1.186 INTEGER, parameter messy\_mecca\_kpp\_Parameters::ind\_Cl2m\_a01 = 0
- 5.49.1.187 INTEGER, parameter messy\_mecca\_kpp\_Parameters::ind\_Cl2O2 = 0
- 5.49.1.188 INTEGER, parameter messy\_mecca\_kpp\_Parameters::ind\_Cl\_a01 = 0
- 5.49.1.189 INTEGER, parameter messy\_mecca\_kpp\_Parameters::ind\_ClHgBr = 0
- 5.49.1.190 INTEGER, parameter messy\_mecca\_kpp\_Parameters::ind\_ClHgBr\_a01 = 0
- 5.49.1.191 INTEGER, parameter messy\_mecca\_kpp\_Parameters::ind\_ClHgOBr = 0



- 5.49.1.192 INTEGER, parameter messy\_mecca\_kpp\_Parameters::ind\_ClHgOBr\_a01 = 0
- 5.49.1.193 INTEGER, parameter messy\_mecca\_kpp\_Parameters::ind\_Clm\_a01 = 0
- 5.49.1.194 INTEGER, parameter messy\_mecca\_kpp\_Parameters::ind\_ClNO2 = 0
- 5.49.1.195 INTEGER, parameter messy\_mecca\_kpp\_Parameters::ind\_ClNO3 = 0
- 5.49.1.196 INTEGER, parameter messy\_mecca\_kpp\_Parameters::ind\_ClO = 0
- 5.49.1.197 INTEGER, parameter messy\_mecca\_kpp\_Parameters::ind\_ClOHm\_a01 = 0
- 5.49.1.198 INTEGER, parameter messy\_mecca\_kpp\_Parameters::ind\_ClOm\_a01 = 0
- 5.49.1.199 INTEGER, parameter messy\_mecca\_kpp\_Parameters::ind\_CO = 25
- 5.49.1.200 INTEGER, parameter messy\_mecca\_kpp\_Parameters::ind\_CO13C4CHO = 0
- 5.49.1.201 INTEGER, parameter messy\_mecca\_kpp\_Parameters::ind\_CO2 = 45
- 5.49.1.202 INTEGER, parameter messy\_mecca\_kpp\_Parameters::ind\_CO235C5CHO = 0
- 5.49.1.203 INTEGER, parameter messy\_mecca\_kpp\_Parameters::ind\_CO235C6CHO = 0
- 5.49.1.204 INTEGER, parameter messy\_mecca\_kpp\_Parameters::ind\_CO235C6CO3 = 0
- 5.49.1.205 INTEGER, parameter messy\_mecca\_kpp\_Parameters::ind\_CO235C6O2 = 0
- 5.49.1.206 INTEGER, parameter messy\_mecca\_kpp\_Parameters::ind\_CO235C6OOH = 0
- 5.49.1.207 INTEGER, parameter messy\_mecca\_kpp\_Parameters::ind\_CO23C3CHO = 0
- 5.49.1.208 INTEGER, parameter messy\_mecca\_kpp\_Parameters::ind\_CO23C4CHO = 0
- 5.49.1.209 INTEGER, parameter messy\_mecca\_kpp\_Parameters::ind\_CO23C4CO3 = 0
- 5.49.1.210 INTEGER, parameter messy\_mecca\_kpp\_Parameters::ind\_CO23C4CO3H = 0
- 5.49.1.211 INTEGER, parameter messy\_mecca\_kpp\_Parameters::ind\_CO2\_a01 = 0

- 5.49.1.212 INTEGER, parameter messy\_mecca\_kpp\_Parameters::ind\_CO2H3CHO = 0
- 5.49.1.213 INTEGER, parameter messy\_mecca\_kpp\_Parameters::ind\_CO2H3CO3 = 0
- 5.49.1.214 INTEGER, parameter messy\_mecca\_kpp\_Parameters::ind\_CO2H3CO3H = 0
- 5.49.1.215 INTEGER, parameter messy\_mecca\_kpp\_Parameters::ind\_CO3m\_a01 = 0
- 5.49.1.216 INTEGER, parameter messy\_mecca\_kpp\_Parameters::ind\_D1O\_a01 = 0
- 5.49.1.217 INTEGER, parameter messy\_mecca\_kpp\_Parameters::ind\_D2O\_a01 = 0
- 5.49.1.218 INTEGER, parameter messy\_mecca\_kpp\_Parameters::ind\_DA\_a01 = 0
- 5.49.1.219 INTEGER, parameter messy\_mecca\_kpp\_Parameters::ind\_DAHp\_a01 = 0
- 5.49.1.220 INTEGER, parameter messy\_mecca\_kpp\_Parameters::ind\_DAm\_a01 = 0
- 5.49.1.221 INTEGER, parameter messy\_mecca\_kpp\_Parameters::ind\_DGtAi\_a01 = 0
- 5.49.1.222 INTEGER, parameter messy\_mecca\_kpp\_Parameters::ind\_DGtAs\_a01 = 0
- 5.49.1.223 INTEGER, parameter messy\_mecca\_kpp\_Parameters::ind\_DMS = 0
- 5.49.1.224 INTEGER, parameter messy\_mecca\_kpp\_Parameters::ind\_DMS\_a01 = 0
- 5.49.1.225 INTEGER, parameter messy\_mecca\_kpp\_Parameters::ind\_DMSO = 0
- 5.49.1.226 INTEGER, parameter messy\_mecca\_kpp\_Parameters::ind\_DMSO\_a01 = 0
- 5.49.1.227 INTEGER, parameter messy\_mecca\_kpp\_Parameters::ind\_Dummy = 0
- 5.49.1.228 INTEGER, parameter messy\_mecca\_kpp\_Parameters::ind\_em = 0
- 5.49.1.229 INTEGER, parameter messy\_mecca\_kpp\_Parameters::ind\_ETHGLY = 0
- 5.49.1.230 INTEGER, parameter messy\_mecca\_kpp\_Parameters::ind\_ETHOHNO3 = 0
- 5.49.1.231 INTEGER, parameter messy\_mecca\_kpp\_Parameters::ind\_GLYOX = 0
- 5.49.1.232 INTEGER, parameter messy\_mecca\_kpp\_Parameters::ind\_H = 9
- 5.49.1.233 INTEGER, parameter messy\_mecca\_kpp\_Parameters::ind\_H2 = 12
- 5.49.1.234 INTEGER, parameter messy\_mecca\_kpp\_Parameters::ind\_H2O = 41

- 5.49.1.235 INTEGER, parameter messy\_mecca\_kpp\_Parameters::ind\_H2O2 = 6
- 5.49.1.236 INTEGER, parameter messy\_mecca\_kpp\_Parameters::ind\_H2O2\_a01 = 0
- 5.49.1.237 INTEGER, parameter messy\_mecca\_kpp\_Parameters::ind\_H2O\_a01 = 0
- 5.49.1.238 INTEGER, parameter messy\_mecca\_kpp\_Parameters::ind\_H2OH2O = 7
- 5.49.1.239 INTEGER, parameter messy\_mecca\_kpp\_Parameters::ind\_H2SO4 = 0
- 5.49.1.240 INTEGER, parameter messy\_mecca\_kpp\_Parameters::ind\_H2SO4\_a01 = 0
- 5.49.1.241 INTEGER, parameter messy\_mecca\_kpp\_Parameters::ind\_HBr = 0
- 5.49.1.242 INTEGER, parameter messy\_mecca\_kpp\_Parameters::ind\_HBr\_a01 = 0
- 5.49.1.243 INTEGER, parameter messy\_mecca\_kpp\_Parameters::ind\_HCHO = 32
- 5.49.1.244 INTEGER, parameter messy\_mecca\_kpp\_Parameters::ind\_HCHO\_a01 = 0
- 5.49.1.245 INTEGER, parameter messy\_mecca\_kpp\_Parameters::ind\_HCl = 0
- 5.49.1.246 INTEGER, parameter messy\_mecca\_kpp\_Parameters::ind\_HCl\_a01 = 0
- 5.49.1.247 INTEGER, parameter messy\_mecca\_kpp\_Parameters::ind\_HCO3m\_a01 = 0
- 5.49.1.248 INTEGER, parameter messy\_mecca\_kpp\_Parameters::ind\_HCOC5 = 0
- 5.49.1.249 INTEGER, parameter messy\_mecca\_kpp\_Parameters::ind\_HCOCH2CHO = 0
- 5.49.1.250 INTEGER, parameter messy\_mecca\_kpp\_Parameters::ind\_HCOCH2CO2H = 0
- 5.49.1.251 INTEGER, parameter messy\_mecca\_kpp\_Parameters::ind\_HCOCH2CO3 = 0
- 5.49.1.252 INTEGER, parameter messy\_mecca\_kpp\_Parameters::ind\_HCOCH2CO3H = 0
- 5.49.1.253 INTEGER, parameter messy\_mecca\_kpp\_Parameters::ind\_HCOCH2O2 = 0
- 5.49.1.254 INTEGER, parameter messy\_mecca\_kpp\_Parameters::ind\_HCOCO2H = 0
- 5.49.1.255 INTEGER, parameter messy\_mecca\_kpp\_Parameters::ind\_HCOCO3 = 0
- 5.49.1.256 INTEGER, parameter messy\_mecca\_kpp\_Parameters::ind\_HCOCO3A = 0

- 5.49.1.257 INTEGER, parameter messy\_mecca\_kpp\_Parameters::ind\_HCOCO3H = 0
- 5.49.1.258 INTEGER, parameter messy\_mecca\_kpp\_Parameters::ind\_HCOOH = 29
- 5.49.1.259 INTEGER, parameter messy\_mecca\_kpp\_Parameters::ind\_HCOOH\_a01 = 0
- 5.49.1.260 INTEGER, parameter messy\_mecca\_kpp\_Parameters::ind\_HCOOm\_a01 = 0
- 5.49.1.261 INTEGER, parameter messy\_mecca\_kpp\_Parameters::ind\_Hg = 0
- 5.49.1.262 INTEGER, parameter messy\_mecca\_kpp\_Parameters::ind\_Hg\_a01 = 0
- 5.49.1.263 INTEGER, parameter messy\_mecca\_kpp\_Parameters::ind\_HgBr = 0
- 5.49.1.264 INTEGER, parameter messy\_mecca\_kpp\_Parameters::ind\_HgBr2 = 0
- 5.49.1.265 INTEGER, parameter messy\_mecca\_kpp\_Parameters::ind\_HgBr2\_a01 = 0
- 5.49.1.266 INTEGER, parameter messy\_mecca\_kpp\_Parameters::ind\_HgBr3m\_a01 = 0
- 5.49.1.267 INTEGER, parameter messy\_mecca\_kpp\_Parameters::ind\_HgBr4mm\_a01 = 0
- 5.49.1.268 INTEGER, parameter messy\_mecca\_kpp\_Parameters::ind\_HgBrp\_a01 = 0
- 5.49.1.269 INTEGER, parameter messy\_mecca\_kpp\_Parameters::ind\_HgCl = 0
- 5.49.1.270 INTEGER, parameter messy\_mecca\_kpp\_Parameters::ind\_HgCl2 = 0
- 5.49.1.271 INTEGER, parameter messy\_mecca\_kpp\_Parameters::ind\_HgCl2\_a01 = 0
- 5.49.1.272 INTEGER, parameter messy\_mecca\_kpp\_Parameters::ind\_HgCl3m\_a01 = 0
- 5.49.1.273 INTEGER, parameter messy\_mecca\_kpp\_Parameters::ind\_HgCl4mm\_a01 = 0
- 5.49.1.274 INTEGER, parameter messy\_mecca\_kpp\_Parameters::ind\_HgClp\_a01 = 0
- 5.49.1.275 INTEGER, parameter messy\_mecca\_kpp\_Parameters::ind\_HgO = 0
- 5.49.1.276 INTEGER, parameter messy\_mecca\_kpp\_Parameters::ind\_HgO\_a01 = 0
- 5.49.1.277 INTEGER, parameter messy\_mecca\_kpp\_Parameters::ind\_HgOH\_a01 = 0
- 5.49.1.278 INTEGER, parameter messy\_mecca\_kpp\_Parameters::ind\_HgOHCl\_a01 = 0

- 5.49.1.279 INTEGER, parameter messy\_mecca\_kpp\_Parameters::ind\_HgOH<sub>OH</sub>\_a01 = 0
- 5.49.1.280 INTEGER, parameter messy\_mecca\_kpp\_Parameters::ind\_HgOH<sub>P</sub>\_a01 = 0
- 5.49.1.281 INTEGER, parameter messy\_mecca\_kpp\_Parameters::ind\_Hg<sub>P</sub>\_a01 = 0
- 5.49.1.282 INTEGER, parameter messy\_mecca\_kpp\_Parameters::ind\_Hg<sub>PP</sub>\_a01 = 0
- 5.49.1.283 INTEGER, parameter messy\_mecca\_kpp\_Parameters::ind\_HgSO<sub>3</sub>2mm\_-a01 = 0
- 5.49.1.284 INTEGER, parameter messy\_mecca\_kpp\_Parameters::ind\_HgSO<sub>3</sub>\_a01 = 0
- 5.49.1.285 INTEGER, parameter messy\_mecca\_kpp\_Parameters::ind\_HI = 0
- 5.49.1.286 INTEGER, parameter messy\_mecca\_kpp\_Parameters::ind\_HI\_a01 = 0
- 5.49.1.287 INTEGER, parameter messy\_mecca\_kpp\_Parameters::ind\_HIO<sub>3</sub> = 0
- 5.49.1.288 INTEGER, parameter messy\_mecca\_kpp\_Parameters::ind\_HIO<sub>3</sub>\_a01 = 0
- 5.49.1.289 INTEGER, parameter messy\_mecca\_kpp\_Parameters::ind\_HNO = 27
- 5.49.1.290 INTEGER, parameter messy\_mecca\_kpp\_Parameters::ind\_HNO<sub>3</sub> = 17
- 5.49.1.291 INTEGER, parameter messy\_mecca\_kpp\_Parameters::ind\_HNO<sub>3</sub>\_a01 = 0
- 5.49.1.292 INTEGER, parameter messy\_mecca\_kpp\_Parameters::ind\_HNO<sub>4</sub> = 14
- 5.49.1.293 INTEGER, parameter messy\_mecca\_kpp\_Parameters::ind\_HNO<sub>4</sub>\_a01 = 0
- 5.49.1.294 INTEGER, parameter messy\_mecca\_kpp\_Parameters::ind\_HO<sub>12</sub>CO<sub>3</sub>C<sub>4</sub> = 0
- 5.49.1.295 INTEGER, parameter messy\_mecca\_kpp\_Parameters::ind\_HO<sub>2</sub> = 36
- 5.49.1.296 INTEGER, parameter messy\_mecca\_kpp\_Parameters::ind\_HO<sub>2</sub>\_a01 = 0
- 5.49.1.297 INTEGER, parameter messy\_mecca\_kpp\_Parameters::ind\_HOBr = 0
- 5.49.1.298 INTEGER, parameter messy\_mecca\_kpp\_Parameters::ind\_HOBr\_a01 = 0
- 5.49.1.299 INTEGER, parameter messy\_mecca\_kpp\_Parameters::ind\_HOC<sub>2</sub>H<sub>4</sub>CO<sub>2</sub>H = 0
- 5.49.1.300 INTEGER, parameter messy\_mecca\_kpp\_Parameters::ind\_HOC<sub>2</sub>H<sub>4</sub>CO<sub>3</sub> = 0

- 5.49.1.301 INTEGER, parameter messy\_mecca\_kpp\_Parameters::ind\_HOC2H4CO3H = 0
- 5.49.1.302 INTEGER, parameter messy\_mecca\_kpp\_Parameters::ind\_HOCH2CH2O = 0
- 5.49.1.303 INTEGER, parameter messy\_mecca\_kpp\_Parameters::ind\_HOCH2CH2O2 = 0
- 5.49.1.304 INTEGER, parameter messy\_mecca\_kpp\_Parameters::ind\_HOCH2CHO = 0
- 5.49.1.305 INTEGER, parameter messy\_mecca\_kpp\_Parameters::ind\_HOCH2CO2H = 0
- 5.49.1.306 INTEGER, parameter messy\_mecca\_kpp\_Parameters::ind\_HOCH2CO3 = 0
- 5.49.1.307 INTEGER, parameter messy\_mecca\_kpp\_Parameters::ind\_HOCH2CO3H = 0
- 5.49.1.308 INTEGER, parameter messy\_mecca\_kpp\_Parameters::ind\_HOCH2COCHO = 0
- 5.49.1.309 INTEGER, parameter messy\_mecca\_kpp\_Parameters::ind\_HOCH2COC-O2H = 0
- 5.49.1.310 INTEGER, parameter messy\_mecca\_kpp\_Parameters::ind\_HOCH2O2 = 31
- 5.49.1.311 INTEGER, parameter messy\_mecca\_kpp\_Parameters::ind\_HOCH2O2NO2 = 21
- 5.49.1.312 INTEGER, parameter messy\_mecca\_kpp\_Parameters::ind\_HOCH2OH = 10
- 5.49.1.313 INTEGER, parameter messy\_mecca\_kpp\_Parameters::ind\_HOCH2OOH = 23
- 5.49.1.314 INTEGER, parameter messy\_mecca\_kpp\_Parameters::ind\_HOCl = 0
- 5.49.1.315 INTEGER, parameter messy\_mecca\_kpp\_Parameters::ind\_HOCl\_a01 = 0
- 5.49.1.316 INTEGER, parameter messy\_mecca\_kpp\_Parameters::ind\_HOI = 0
- 5.49.1.317 INTEGER, parameter messy\_mecca\_kpp\_Parameters::ind\_HOI\_a01 = 0
- 5.49.1.318 INTEGER, parameter messy\_mecca\_kpp\_Parameters::ind\_HONO = 19
- 5.49.1.319 INTEGER, parameter messy\_mecca\_kpp\_Parameters::ind\_HONO\_a01 = 0

- 5.49.1.320 INTEGER, parameter messy\_mecca\_kpp\_Parameters::ind\_HOOCH2CO3 = 0
- 5.49.1.321 INTEGER, parameter messy\_mecca\_kpp\_Parameters::ind\_HOONO = 0
- 5.49.1.322 INTEGER, parameter messy\_mecca\_kpp\_Parameters::ind\_Hp = 0
- 5.49.1.323 INTEGER, parameter messy\_mecca\_kpp\_Parameters::ind\_Hp\_a01 = 0
- 5.49.1.324 INTEGER, parameter messy\_mecca\_kpp\_Parameters::ind\_Hp\_cs = 0
- 5.49.1.325 INTEGER, parameter messy\_mecca\_kpp\_Parameters::ind\_HSO3m\_a01 = 0
- 5.49.1.326 INTEGER, parameter messy\_mecca\_kpp\_Parameters::ind\_HSO4m\_a01 = 0
- 5.49.1.327 INTEGER, parameter messy\_mecca\_kpp\_Parameters::ind\_HSO5m\_a01 = 0
- 5.49.1.328 INTEGER, parameter messy\_mecca\_kpp\_Parameters::ind\_HYETHO2H = 0
- 5.49.1.329 INTEGER, parameter messy\_mecca\_kpp\_Parameters::ind\_HYPERACET = 0
- 5.49.1.330 INTEGER, parameter messy\_mecca\_kpp\_Parameters::ind\_HYPROPO2 = 0
- 5.49.1.331 INTEGER, parameter messy\_mecca\_kpp\_Parameters::ind\_HYPROPO2H = 0
- 5.49.1.332 INTEGER, parameter messy\_mecca\_kpp\_Parameters::ind\_I = 0
- 5.49.1.333 INTEGER, parameter messy\_mecca\_kpp\_Parameters::ind\_I2 = 0
- 5.49.1.334 INTEGER, parameter messy\_mecca\_kpp\_Parameters::ind\_I2\_a01 = 0
- 5.49.1.335 INTEGER, parameter messy\_mecca\_kpp\_Parameters::ind\_I2O2 = 0
- 5.49.1.336 INTEGER, parameter messy\_mecca\_kpp\_Parameters::ind\_IBr = 0
- 5.49.1.337 INTEGER, parameter messy\_mecca\_kpp\_Parameters::ind\_IBr2m\_a01 = 0
- 5.49.1.338 INTEGER, parameter messy\_mecca\_kpp\_Parameters::ind\_IBr\_a01 = 0
- 5.49.1.339 INTEGER, parameter messy\_mecca\_kpp\_Parameters::ind\_IC3H7NO3 = 0
- 5.49.1.340 INTEGER, parameter messy\_mecca\_kpp\_Parameters::ind\_IC3H7O2 = 0
- 5.49.1.341 INTEGER, parameter messy\_mecca\_kpp\_Parameters::ind\_IC3H7OOH = 0

- 5.49.1.342 INTEGER, parameter messy\_mecca\_kpp\_Parameters::ind\_ICI = 0
- 5.49.1.343 INTEGER, parameter messy\_mecca\_kpp\_Parameters::ind\_ICI2m\_a01 = 0
- 5.49.1.344 INTEGER, parameter messy\_mecca\_kpp\_Parameters::ind\_ICI\_a01 = 0
- 5.49.1.345 INTEGER, parameter messy\_mecca\_kpp\_Parameters::ind\_ICIBrm\_a01 = 0
- 5.49.1.346 INTEGER, parameter messy\_mecca\_kpp\_Parameters::ind\_Im\_a01 = 0
- 5.49.1.347 INTEGER, parameter messy\_mecca\_kpp\_Parameters::ind\_INO2 = 0
- 5.49.1.348 INTEGER, parameter messy\_mecca\_kpp\_Parameters::ind\_INO3 = 0
- 5.49.1.349 INTEGER, parameter messy\_mecca\_kpp\_Parameters::ind\_IO = 0
- 5.49.1.350 INTEGER, parameter messy\_mecca\_kpp\_Parameters::ind\_IO2m\_a01 = 0
- 5.49.1.351 INTEGER, parameter messy\_mecca\_kpp\_Parameters::ind\_IO3m\_a01 = 0
- 5.49.1.352 INTEGER, parameter messy\_mecca\_kpp\_Parameters::ind\_IO\_a01 = 0
- 5.49.1.353 INTEGER, parameter messy\_mecca\_kpp\_Parameters::ind\_IPART = 0
- 5.49.1.354 INTEGER, parameter messy\_mecca\_kpp\_Parameters::ind\_ISO2 = 0
- 5.49.1.355 INTEGER, parameter messy\_mecca\_kpp\_Parameters::ind\_ISON = 0
- 5.49.1.356 INTEGER, parameter messy\_mecca\_kpp\_Parameters::ind\_ISO0H = 0
- 5.49.1.357 INTEGER, parameter messy\_mecca\_kpp\_Parameters::ind\_ISOPAOH = 0
- 5.49.1.358 INTEGER, parameter messy\_mecca\_kpp\_Parameters::ind\_ISOPBNO3 = 0
- 5.49.1.359 INTEGER, parameter messy\_mecca\_kpp\_Parameters::ind\_ISOPBO2 = 0
- 5.49.1.360 INTEGER, parameter messy\_mecca\_kpp\_Parameters::ind\_ISOPBOH = 0
- 5.49.1.361 INTEGER, parameter messy\_mecca\_kpp\_Parameters::ind\_ISOPBOOH = 0
- 5.49.1.362 INTEGER, parameter messy\_mecca\_kpp\_Parameters::ind\_ISOPDNO3 = 0
- 5.49.1.363 INTEGER, parameter messy\_mecca\_kpp\_Parameters::ind\_ISOPDO2 = 0
- 5.49.1.364 INTEGER, parameter messy\_mecca\_kpp\_Parameters::ind\_ISOPDOH = 0
- 5.49.1.365 INTEGER, parameter messy\_mecca\_kpp\_Parameters::ind\_ISOPDOOH = 0



- 5.49.1.366 INTEGER, parameter messy\_mecca\_kpp\_Parameters::ind\_kJmol = 0
- 5.49.1.367 INTEGER, parameter messy\_mecca\_kpp\_Parameters::ind\_LAPINABNO3 = 0
- 5.49.1.368 INTEGER, parameter messy\_mecca\_kpp\_Parameters::ind\_LAPINABO2 = 0
- 5.49.1.369 INTEGER, parameter messy\_mecca\_kpp\_Parameters::ind\_LAPINABOOH = 0
- 5.49.1.370 INTEGER, parameter messy\_mecca\_kpp\_Parameters::ind\_LC4H9NO3 = 0
- 5.49.1.371 INTEGER, parameter messy\_mecca\_kpp\_Parameters::ind\_LC4H9O2 = 0
- 5.49.1.372 INTEGER, parameter messy\_mecca\_kpp\_Parameters::ind\_LC4H9OOH = 0
- 5.49.1.373 INTEGER, parameter messy\_mecca\_kpp\_Parameters::ind\_LC578O2 = 0
- 5.49.1.374 INTEGER, parameter messy\_mecca\_kpp\_Parameters::ind\_LC578OOH = 0
- 5.49.1.375 INTEGER, parameter messy\_mecca\_kpp\_Parameters::ind\_LC5PAN1719 = 0
- 5.49.1.376 INTEGER, parameter messy\_mecca\_kpp\_Parameters::ind\_LCARBON = 2
- 5.49.1.377 INTEGER, parameter messy\_mecca\_kpp\_Parameters::ind\_LHC4ACCHO = 0
- 5.49.1.378 INTEGER, parameter messy\_mecca\_kpp\_Parameters::ind\_LHC4ACCO2H = 0
- 5.49.1.379 INTEGER, parameter messy\_mecca\_kpp\_Parameters::ind\_LHC4ACCO3 = 0
- 5.49.1.380 INTEGER, parameter messy\_mecca\_kpp\_Parameters::ind\_LHC4ACCO3H = 0
- 5.49.1.381 INTEGER, parameter messy\_mecca\_kpp\_Parameters::ind\_LHMKABO2 = 0
- 5.49.1.382 INTEGER, parameter messy\_mecca\_kpp\_Parameters::ind\_LHMKABOOH = 0
- 5.49.1.383 INTEGER, parameter messy\_mecca\_kpp\_Parameters::ind\_LHOC3H6O2 = 0
- 5.49.1.384 INTEGER, parameter messy\_mecca\_kpp\_Parameters::ind\_LHOC3H6OOH = 0

- 5.49.1.385 INTEGER, parameter messy\_mecca\_kpp\_Parameters::ind\_LISOPACNO3 = 0
- 5.49.1.386 INTEGER, parameter messy\_mecca\_kpp\_Parameters::ind\_LISOPACO2 = 0
- 5.49.1.387 INTEGER, parameter messy\_mecca\_kpp\_Parameters::ind\_LISOPACOOH = 0
- 5.49.1.388 INTEGER, parameter messy\_mecca\_kpp\_Parameters::ind\_LMEKO2 = 0
- 5.49.1.389 INTEGER, parameter messy\_mecca\_kpp\_Parameters::ind\_LMEKOOH = 0
- 5.49.1.390 INTEGER, parameter messy\_mecca\_kpp\_Parameters::ind\_LMVKOHABO2 = 0
- 5.49.1.391 INTEGER, parameter messy\_mecca\_kpp\_Parameters::ind\_LMVKOHABO-OH = 0
- 5.49.1.392 INTEGER, parameter messy\_mecca\_kpp\_Parameters::ind\_LNAPINABO2 = 0
- 5.49.1.393 INTEGER, parameter messy\_mecca\_kpp\_Parameters::ind\_LNAPINABOOH = 0
- 5.49.1.394 INTEGER, parameter messy\_mecca\_kpp\_Parameters::ind\_LNBPINABO2 = 0
- 5.49.1.395 INTEGER, parameter messy\_mecca\_kpp\_Parameters::ind\_LNBPINABOOH = 0
- 5.49.1.396 INTEGER, parameter messy\_mecca\_kpp\_Parameters::ind\_LNISO3 = 0
- 5.49.1.397 INTEGER, parameter messy\_mecca\_kpp\_Parameters::ind\_LNISOOH = 0
- 5.49.1.398 INTEGER, parameter messy\_mecca\_kpp\_Parameters::ind\_LO3s = 0
- 5.49.1.399 INTEGER, parameter messy\_mecca\_kpp\_Parameters::ind\_MACO2H = 0
- 5.49.1.400 INTEGER, parameter messy\_mecca\_kpp\_Parameters::ind\_MACO3 = 0
- 5.49.1.401 INTEGER, parameter messy\_mecca\_kpp\_Parameters::ind\_MACO3H = 0
- 5.49.1.402 INTEGER, parameter messy\_mecca\_kpp\_Parameters::ind\_MACR = 0
- 5.49.1.403 INTEGER, parameter messy\_mecca\_kpp\_Parameters::ind\_MACRO2 = 0
- 5.49.1.404 INTEGER, parameter messy\_mecca\_kpp\_Parameters::ind\_MACROH = 0

- 5.49.1.405 INTEGER, parameter messy\_mecca\_kpp\_Parameters::ind\_MACROOH = 0
- 5.49.1.406 INTEGER, parameter messy\_mecca\_kpp\_Parameters::ind\_MEK = 0
- 5.49.1.407 INTEGER, parameter messy\_mecca\_kpp\_Parameters::ind\_MENTHEN6ON-E = 0
- 5.49.1.408 INTEGER, parameter messy\_mecca\_kpp\_Parameters::ind\_MGLYOX = 0
- 5.49.1.409 INTEGER, parameter messy\_mecca\_kpp\_Parameters::ind\_MPAN = 0
- 5.49.1.410 INTEGER, parameter messy\_mecca\_kpp\_Parameters::ind\_MVK = 0
- 5.49.1.411 INTEGER, parameter messy\_mecca\_kpp\_Parameters::ind\_MVKO2 = 0
- 5.49.1.412 INTEGER, parameter messy\_mecca\_kpp\_Parameters::ind\_MVKOH = 0
- 5.49.1.413 INTEGER, parameter messy\_mecca\_kpp\_Parameters::ind\_MVKOOH = 0
- 5.49.1.414 INTEGER, parameter messy\_mecca\_kpp\_Parameters::ind\_N = 0
- 5.49.1.415 INTEGER, parameter messy\_mecca\_kpp\_Parameters::ind\_N2 = 44
- 5.49.1.416 INTEGER, parameter messy\_mecca\_kpp\_Parameters::ind\_N2D = 0
- 5.49.1.417 INTEGER, parameter messy\_mecca\_kpp\_Parameters::ind\_N2O = 1
- 5.49.1.418 INTEGER, parameter messy\_mecca\_kpp\_Parameters::ind\_N2O5 = 5
- 5.49.1.419 INTEGER, parameter messy\_mecca\_kpp\_Parameters::ind\_N2O5\_a01 = 0
- 5.49.1.420 INTEGER, parameter messy\_mecca\_kpp\_Parameters::ind\_N2O\_c = 0
- 5.49.1.421 INTEGER, parameter messy\_mecca\_kpp\_Parameters::ind\_N2p = 0
- 5.49.1.422 INTEGER, parameter messy\_mecca\_kpp\_Parameters::ind\_NACA = 0
- 5.49.1.423 INTEGER, parameter messy\_mecca\_kpp\_Parameters::ind\_Nap\_a01 = 0
- 5.49.1.424 INTEGER, parameter messy\_mecca\_kpp\_Parameters::ind\_NC4CHO = 0
- 5.49.1.425 INTEGER, parameter messy\_mecca\_kpp\_Parameters::ind\_NC4H10 = 0
- 5.49.1.426 INTEGER, parameter messy\_mecca\_kpp\_Parameters::ind\_NH2 = 26
- 5.49.1.427 INTEGER, parameter messy\_mecca\_kpp\_Parameters::ind\_NH2O = 22

- 5.49.1.428 INTEGER, parameter messy\_mecca\_kpp\_Parameters::ind\_NH2OH = 11
- 5.49.1.429 INTEGER, parameter messy\_mecca\_kpp\_Parameters::ind\_NH3 = 3
- 5.49.1.430 INTEGER, parameter messy\_mecca\_kpp\_Parameters::ind\_NH3\_a01 = 0
- 5.49.1.431 INTEGER, parameter messy\_mecca\_kpp\_Parameters::ind\_NH4p\_a01 = 0
- 5.49.1.432 INTEGER, parameter messy\_mecca\_kpp\_Parameters::ind\_NHOH = 13
- 5.49.1.433 INTEGER, parameter messy\_mecca\_kpp\_Parameters::ind\_NISOPO2 = 0
- 5.49.1.434 INTEGER, parameter messy\_mecca\_kpp\_Parameters::ind\_NISOPOOH = 0
- 5.49.1.435 INTEGER, parameter messy\_mecca\_kpp\_Parameters::ind\_NO = 34
- 5.49.1.436 INTEGER, parameter messy\_mecca\_kpp\_Parameters::ind\_NO2 = 40
- 5.49.1.437 INTEGER, parameter messy\_mecca\_kpp\_Parameters::ind\_NO2\_a01 = 0
- 5.49.1.438 INTEGER, parameter messy\_mecca\_kpp\_Parameters::ind\_NO2m\_a01 = 0
- 5.49.1.439 INTEGER, parameter messy\_mecca\_kpp\_Parameters::ind\_NO3 = 33
- 5.49.1.440 INTEGER, parameter messy\_mecca\_kpp\_Parameters::ind\_NO3\_a01 = 0
- 5.49.1.441 INTEGER, parameter messy\_mecca\_kpp\_Parameters::ind\_NO3m\_a01 = 0
- 5.49.1.442 INTEGER, parameter messy\_mecca\_kpp\_Parameters::ind\_NO3m\_cs = 0
- 5.49.1.443 INTEGER, parameter messy\_mecca\_kpp\_Parameters::ind\_NO4m\_a01 = 0
- 5.49.1.444 INTEGER, parameter messy\_mecca\_kpp\_Parameters::ind\_NO\_a01 = 0
- 5.49.1.445 INTEGER, parameter messy\_mecca\_kpp\_Parameters::ind\_NOA = 0
- 5.49.1.446 INTEGER, parameter messy\_mecca\_kpp\_Parameters::ind\_NOp = 0
- 5.49.1.447 INTEGER, parameter messy\_mecca\_kpp\_Parameters::ind\_NOPINDCO = 0
- 5.49.1.448 INTEGER, parameter messy\_mecca\_kpp\_Parameters::ind\_NOPINDO2 = 0
- 5.49.1.449 INTEGER, parameter messy\_mecca\_kpp\_Parameters::ind\_NOPINDOOH = 0
- 5.49.1.450 INTEGER, parameter messy\_mecca\_kpp\_Parameters::ind\_NOPINONE = 0

- 5.49.1.451 INTEGER, parameter messy\_mecca\_kpp\_Parameters::ind\_NOPINOO = 0
- 5.49.1.452 INTEGER, parameter messy\_mecca\_kpp\_Parameters::ind\_NORPINAL = 0
- 5.49.1.453 INTEGER, parameter messy\_mecca\_kpp\_Parameters::ind\_NORPINIC = 0
- 5.49.1.454 INTEGER, parameter messy\_mecca\_kpp\_Parameters::ind\_Np = 0
- 5.49.1.455 INTEGER, parameter messy\_mecca\_kpp\_Parameters::ind\_O1D = 8
- 5.49.1.456 INTEGER, parameter messy\_mecca\_kpp\_Parameters::ind\_O2 = 43
- 5.49.1.457 INTEGER, parameter messy\_mecca\_kpp\_Parameters::ind\_O2\_a01 = 0
- 5.49.1.458 INTEGER, parameter messy\_mecca\_kpp\_Parameters::ind\_O2m\_a01 = 0
- 5.49.1.459 INTEGER, parameter messy\_mecca\_kpp\_Parameters::ind\_O2p = 0
- 5.49.1.460 INTEGER, parameter messy\_mecca\_kpp\_Parameters::ind\_O3 = 35
- 5.49.1.461 INTEGER, parameter messy\_mecca\_kpp\_Parameters::ind\_O3\_a01 = 0
- 5.49.1.462 INTEGER, parameter messy\_mecca\_kpp\_Parameters::ind\_O3P = 30
- 5.49.1.463 INTEGER, parameter messy\_mecca\_kpp\_Parameters::ind\_O3s = 0
- 5.49.1.464 INTEGER, parameter messy\_mecca\_kpp\_Parameters::ind\_OCIO = 0
- 5.49.1.465 INTEGER, parameter messy\_mecca\_kpp\_Parameters::ind\_OCS = 0
- 5.49.1.466 INTEGER, parameter messy\_mecca\_kpp\_Parameters::ind\_OH = 38
- 5.49.1.467 INTEGER, parameter messy\_mecca\_kpp\_Parameters::ind\_OH2MENTHE-  
N6ONE = 0
- 5.49.1.468 INTEGER, parameter messy\_mecca\_kpp\_Parameters::ind\_OH\_a01 = 0
- 5.49.1.469 INTEGER, parameter messy\_mecca\_kpp\_Parameters::ind\_OHm\_a01 = 0
- 5.49.1.470 INTEGER, parameter messy\_mecca\_kpp\_Parameters::ind\_OHMENTHEN6-  
ONEO2 = 0
- 5.49.1.471 INTEGER, parameter messy\_mecca\_kpp\_Parameters::ind\_OIO = 0
- 5.49.1.472 INTEGER, parameter messy\_mecca\_kpp\_Parameters::ind\_Op = 0
- 5.49.1.473 INTEGER, parameter messy\_mecca\_kpp\_Parameters::ind\_PAN = 0

- 5.49.1.474 INTEGER, parameter messy\_mecca\_kpp\_Parameters::ind\_PAN\_a01 = 0
- 5.49.1.475 INTEGER, parameter messy\_mecca\_kpp\_Parameters::ind\_PERPINONIC = 0
- 5.49.1.476 INTEGER, parameter messy\_mecca\_kpp\_Parameters::ind\_PHAN = 0
- 5.49.1.477 INTEGER, parameter messy\_mecca\_kpp\_Parameters::ind\_PINAL = 0
- 5.49.1.478 INTEGER, parameter messy\_mecca\_kpp\_Parameters::ind\_PINALNO3 = 0
- 5.49.1.479 INTEGER, parameter messy\_mecca\_kpp\_Parameters::ind\_PINALO2 = 0
- 5.49.1.480 INTEGER, parameter messy\_mecca\_kpp\_Parameters::ind\_PINALOOH = 0
- 5.49.1.481 INTEGER, parameter messy\_mecca\_kpp\_Parameters::ind\_PINIC = 0
- 5.49.1.482 INTEGER, parameter messy\_mecca\_kpp\_Parameters::ind\_PINONIC = 0
- 5.49.1.483 INTEGER, parameter messy\_mecca\_kpp\_Parameters::ind\_PR2O2HNO3 = 0
- 5.49.1.484 INTEGER, parameter messy\_mecca\_kpp\_Parameters::ind\_PROD1\_a01 = 0
- 5.49.1.485 INTEGER, parameter messy\_mecca\_kpp\_Parameters::ind\_PROD2\_a01 = 0
- 5.49.1.486 INTEGER, parameter messy\_mecca\_kpp\_Parameters::ind\_PRONO3BO2 = 0
- 5.49.1.487 INTEGER, parameter messy\_mecca\_kpp\_Parameters::ind\_RBr = 0
- 5.49.1.488 INTEGER, parameter messy\_mecca\_kpp\_Parameters::ind\_RCly = 0
- 5.49.1.489 INTEGER, parameter messy\_mecca\_kpp\_Parameters::ind\_RGM\_cs = 0
- 5.49.1.490 INTEGER, parameter messy\_mecca\_kpp\_Parameters::ind\_RH2O = 0
- 5.49.1.491 INTEGER, parameter messy\_mecca\_kpp\_Parameters::ind\_RNOy = 0
- 5.49.1.492 INTEGER, parameter messy\_mecca\_kpp\_Parameters::ind\_RO6R1NO3 = 0
- 5.49.1.493 INTEGER, parameter messy\_mecca\_kpp\_Parameters::ind\_RO6R1O2 = 0
- 5.49.1.494 INTEGER, parameter messy\_mecca\_kpp\_Parameters::ind\_RO6R1OOH = 0
- 5.49.1.495 INTEGER, parameter messy\_mecca\_kpp\_Parameters::ind\_RO6R3NO3 = 0

- 5.49.1.496 INTEGER, parameter messy\_mecca\_kpp\_Parameters::ind\_RO6R3O2 = 0
- 5.49.1.497 INTEGER, parameter messy\_mecca\_kpp\_Parameters::ind\_RO6R3OOH = 0
- 5.49.1.498 INTEGER, parameter messy\_mecca\_kpp\_Parameters::ind\_RO6R3P = 0
- 5.49.1.499 INTEGER, parameter messy\_mecca\_kpp\_Parameters::ind\_ROO6R1NO3 = 0
- 5.49.1.500 INTEGER, parameter messy\_mecca\_kpp\_Parameters::ind\_ROO6R1O2 = 0
- 5.49.1.501 INTEGER, parameter messy\_mecca\_kpp\_Parameters::ind\_ROO6R1OOH = 0
- 5.49.1.502 INTEGER, parameter messy\_mecca\_kpp\_Parameters::ind\_ROO6R3NO3 = 0
- 5.49.1.503 INTEGER, parameter messy\_mecca\_kpp\_Parameters::ind\_ROO6R3O = 0
- 5.49.1.504 INTEGER, parameter messy\_mecca\_kpp\_Parameters::ind\_ROO6R3O2 = 0
- 5.49.1.505 INTEGER, parameter messy\_mecca\_kpp\_Parameters::ind\_ROO6R3OOH = 0
- 5.49.1.506 INTEGER, parameter messy\_mecca\_kpp\_Parameters::ind\_ROO6R4P = 0
- 5.49.1.507 INTEGER, parameter messy\_mecca\_kpp\_Parameters::ind\_ROO6R5O2 = 0
- 5.49.1.508 INTEGER, parameter messy\_mecca\_kpp\_Parameters::ind\_ROO6R5P = 0
- 5.49.1.509 INTEGER, parameter messy\_mecca\_kpp\_Parameters::ind\_S = 0
- 5.49.1.510 INTEGER, parameter messy\_mecca\_kpp\_Parameters::ind\_SF6 = 0
- 5.49.1.511 INTEGER, parameter messy\_mecca\_kpp\_Parameters::ind\_SH = 0
- 5.49.1.512 INTEGER, parameter messy\_mecca\_kpp\_Parameters::ind\_SO = 0
- 5.49.1.513 INTEGER, parameter messy\_mecca\_kpp\_Parameters::ind\_SO2 = 0
- 5.49.1.514 INTEGER, parameter messy\_mecca\_kpp\_Parameters::ind\_SO2\_a01 = 0
- 5.49.1.515 INTEGER, parameter messy\_mecca\_kpp\_Parameters::ind\_SO3 = 0
- 5.49.1.516 INTEGER, parameter messy\_mecca\_kpp\_Parameters::ind\_SO3m\_a01 = 0
- 5.49.1.517 INTEGER, parameter messy\_mecca\_kpp\_Parameters::ind\_SO3mm\_a01 = 0

- 5.49.1.518 INTEGER, parameter messy\_mecca\_kpp\_Parameters::ind\_SO4m\_a01 = 0
- 5.49.1.519 INTEGER, parameter messy\_mecca\_kpp\_Parameters::ind\_SO4mm\_a01 = 0
- 5.49.1.520 INTEGER, parameter messy\_mecca\_kpp\_Parameters::ind\_SO5m\_a01 = 0
- 5.49.1.521 INTEGER, parameter messy\_mecca\_kpp\_Parameters::indf\_CO2 = 3
- 5.49.1.522 INTEGER, parameter messy\_mecca\_kpp\_Parameters::indf\_N2 = 2
- 5.49.1.523 INTEGER, parameter messy\_mecca\_kpp\_Parameters::indf\_O2 = 1
- 5.49.1.524 INTEGER, parameter messy\_mecca\_kpp\_Parameters::LU\_NONZERO = 408
- 5.49.1.525 INTEGER, parameter messy\_mecca\_kpp\_Parameters::NFIX = 3
- 5.49.1.526 INTEGER, parameter messy\_mecca\_kpp\_Parameters::NFIXST = 43
- 5.49.1.527 INTEGER, parameter messy\_mecca\_kpp\_Parameters::NLOOKAT = 0
- 5.49.1.528 INTEGER, parameter messy\_mecca\_kpp\_Parameters::NMASS = 1
- 5.49.1.529 INTEGER, parameter messy\_mecca\_kpp\_Parameters::NMONITOR = 0
- 5.49.1.530 INTEGER, parameter messy\_mecca\_kpp\_Parameters::NONZERO = 367
- 5.49.1.531 INTEGER, parameter messy\_mecca\_kpp\_Parameters::NREACT = 122
- 5.49.1.532 INTEGER, parameter messy\_mecca\_kpp\_Parameters::NSPEC = 45
- 5.49.1.533 INTEGER, parameter messy\_mecca\_kpp\_Parameters::NVAR = 42
- 5.49.1.534 INTEGER, parameter messy\_mecca\_kpp\_Parameters::NVARACT = 40
- 5.49.1.535 INTEGER, parameter messy\_mecca\_kpp\_Parameters::NVARST = 1

The documentation for this module was generated from the following file:

- [/home/sander/e2/messy\\_d2.50s\\_rs/messy/mbm/caaba/messy\\_mecca\\_kpp\\_parameters.f90](#)

## 5.50 messy\_mecca\_kpp\_Precision Module Reference

### Public Attributes

- INTEGER, parameter [sp](#) = SELECTED\_REAL\_KIND(6, 30)
- INTEGER, parameter [dp](#) = SELECTED\_REAL\_KIND(12, 307)



- INTEGER, parameter [qp](#) = SELECTED\_REAL\_KIND(18, 400)

### 5.50.1 Member Data Documentation

5.50.1.1 INTEGER, parameter [messy\\_mecca\\_kpp\\_Precision::dp](#) = SELECTED\_REAL\_KIND(12, 307)

5.50.1.2 INTEGER, parameter [messy\\_mecca\\_kpp\\_Precision::qp](#) = SELECTED\_REAL\_KIND(18, 400)

5.50.1.3 INTEGER, parameter [messy\\_mecca\\_kpp\\_Precision::sp](#) = SELECTED\_REAL\_KIND(6, 30)

The documentation for this module was generated from the following file:

- [/home/sander/e2/messy\\_d2.50s\\_rs/messy/mbm/caaba/messy\\_mecca\\_kpp\\_precision.f90](#)

## 5.51 messy\_mecca\_kpp\_Rates Module Reference

### Public Member Functions

- REAL(kind=dp) function [ARR](#) (A0, B0, C0)
- REAL(kind=dp) function [ARR2](#) (A0, B0)
- REAL(kind=dp) function [EP2](#) (A0, C0, A2, C2, A3, C3)
- REAL(kind=dp) function [EP3](#) (A1, C1, A2, C2)
- REAL(kind=dp) function [FALL](#) (A0, B0, C0, A1, B1, C1, CF)
- ELEMENTAL REAL(kind=dp) function [k\\_3rd](#) (temp, cair, k0\_300K, n, kinf\_300K, m, fc)
- ELEMENTAL REAL(kind=dp) function [k\\_arr](#) (k\_298, tdep, temp)
- ELEMENTAL REAL(dp) function [k\\_SIV\\_H2O2](#) (k\_298, tdep, cHp, temp)
- ELEMENTAL REAL(dp) function [k\\_3rd\\_iupac](#) (temp, cair, k0\_300K, n, kinf\_300K, m, fc)
- ELEMENTAL REAL(dp) function [alpha\\_AN](#) (n, ro2type, temp, cair)
- ELEMENTAL REAL(dp) function [k\\_limited](#) (k3rd, cHp)
- ELEMENTAL REAL(dp) function [k\\_N2\\_O](#) (temp, temp\_ion)
- ELEMENTAL REAL(dp) function [k\\_Op\\_O2](#) (temp, temp\_ion)
- ELEMENTAL REAL(dp) function [k\\_Op\\_N2](#) (temp, temp\_ion)
- subroutine [Update\\_SUN](#) ()
- subroutine [Update\\_RCONST](#) ()
- subroutine [Update\\_PHOTO](#) ()

### 5.51.1 Member Function/Subroutine Documentation

- 5.51.1.1 ELEMENTAL REAL(dp) function `messy_mecca_kpp_Rates::alpha_AN`  
( INTEGER, intent(in) *n*, INTEGER, intent(in) *ro2type*, REAL(dp), intent(in) *temp*,  
REAL(dp), intent(in) *cair* )
- 5.51.1.2 REAL(kind=dp) function `messy_mecca_kpp_Rates::ARR` ( REAL *A0*, REAL *B0*,  
REAL *C0* )
- 5.51.1.3 REAL(kind=dp) function `messy_mecca_kpp_Rates::ARR2` ( REAL *A0*, REAL *B0*  
)
- 5.51.1.4 REAL(kind=dp) function `messy_mecca_kpp_Rates::EP2` ( REAL *A0*, REAL *C0*,  
REAL *A2*, REAL *C2*, REAL *A3*, REAL *C3* )
- 5.51.1.5 REAL(kind=dp) function `messy_mecca_kpp_Rates::EP3` ( REAL *A1*, REAL *C1*,  
REAL *A2*, REAL *C2* )
- 5.51.1.6 REAL(kind=dp) function `messy_mecca_kpp_Rates::FALL` ( REAL *A0*, REAL *B0*,  
REAL *C0*, REAL *A1*, REAL *B1*, REAL *C1*, REAL *CF* )
- 5.51.1.7 ELEMENTAL REAL(kind=dp) function `messy_mecca_kpp_Rates::k_3rd`  
( REAL(kind=dp), intent(in) *temp*, REAL(kind=dp), intent(in) *cair*, REAL, intent(in)  
*k0\_300K*, REAL, intent(in) *n*, REAL, intent(in) *kinf\_300K*, REAL, intent(in) *m*, REAL,  
intent(in) *fc* )
- 5.51.1.8 ELEMENTAL REAL(dp) function `messy_mecca_kpp_Rates::k_3rd_iupac` ( REAL(dp), intent(in) *temp*, REAL(dp), intent(in) *cair*, REAL, intent(in) *k0\_300K*, REAL,  
intent(in) *n*, REAL, intent(in) *kinf\_300K*, REAL, intent(in) *m*, REAL, intent(in) *fc* )
- 5.51.1.9 ELEMENTAL REAL(kind=dp) function `messy_mecca_kpp_Rates::k_arr` ( REAL,  
intent(in) *k\_298*, REAL, intent(in) *tdep*, REAL(kind=dp), intent(in) *temp* )
- 5.51.1.10 ELEMENTAL REAL(dp) function `messy_mecca_kpp_Rates::k_limited` ( REAL(dp), intent(in) *k3rd*, REAL(dp), intent(in) *cHp* )
- 5.51.1.11 ELEMENTAL REAL(dp) function `messy_mecca_kpp_Rates::k_N2_O` ( REAL(dp), intent(in) *temp*, REAL(dp), intent(in) *temp\_ion* )
- 5.51.1.12 ELEMENTAL REAL(dp) function `messy_mecca_kpp_Rates::k_Op_N2` ( REAL(dp), intent(in) *temp*, REAL(dp), intent(in) *temp\_ion* )
- 5.51.1.13 ELEMENTAL REAL(dp) function `messy_mecca_kpp_Rates::k_Op_O2` ( REAL(dp), intent(in) *temp*, REAL(dp), intent(in) *temp\_ion* )
- 5.51.1.14 ELEMENTAL REAL(dp) function `messy_mecca_kpp_Rates::k_SIV_H2O2` ( REAL, intent(in) *k\_298*, REAL, intent(in) *tdep*, REAL(dp), intent(in) *cHp*, REAL(dp),  
intent(in) *temp* )

5.51.1.15 subroutine messy\_mecca\_kpp\_Rates::Update\_PHOTO ( )

5.51.1.16 subroutine messy\_mecca\_kpp\_Rates::Update\_RCONST ( )

5.51.1.17 subroutine messy\_mecca\_kpp\_Rates::Update\_SUN ( )

The documentation for this module was generated from the following file:

- [/home/sander/e2/messy\\_d2.50s\\_rs/messy/mbm/caaba/messy\\_mecca\\_kpp\\_rates.f90](#)

## 5.52 messy\_mecca\_kpp\_Util Module Reference

### Public Member Functions

- subroutine [initialize\\_indexarrays](#)
- subroutine [InitSaveData](#) ( )
- subroutine [SaveData](#) ( )
- subroutine [CloseSaveData](#) ( )
- subroutine [GenerateMatlab](#) (PREFIX)
- ELEMENTAL INTEGER function [tag2num](#) (id)
- subroutine [Shuffle\\_user2kpp](#) (V\_USER, V)
- subroutine [Shuffle\\_kpp2user](#) (V, V\_USER)
- subroutine [GetMass](#) (CL, Mass)

### 5.52.1 Member Function/Subroutine Documentation

5.52.1.1 subroutine messy\_mecca\_kpp\_Util::CloseSaveData ( )

5.52.1.2 subroutine messy\_mecca\_kpp\_Util::GenerateMatlab ( CHARACTER(LEN=8)  
*PREFIX* )

5.52.1.3 subroutine messy\_mecca\_kpp\_Util::GetMass ( REAL(kind=dp),  
dimension(nspec) *CL*, REAL(kind=dp), dimension(1) *Mass* )

5.52.1.4 subroutine messy\_mecca\_kpp\_Util::initialize\_indexarrays ( )

5.52.1.5 subroutine messy\_mecca\_kpp\_Util::InitSaveData ( )

5.52.1.6 subroutine messy\_mecca\_kpp\_Util::SaveData ( )

5.52.1.7 subroutine messy\_mecca\_kpp\_Util::Shuffle\_kpp2user ( REAL(kind=dp),  
dimension(nvar) *V*, REAL(kind=dp), dimension(nvar) *V\_USER* )

5.52.1.8 subroutine `messy_mecca_kpp_Util::Shuffle_user2kpp` ( `REAL(kind=dp)`,  
dimension(nvar) *V\_USER*, `REAL(kind=dp)`, dimension(nvar) *V* )

5.52.1.9 ELEMENTAL INTEGER function `messy_mecca_kpp_Util::tag2num` (  
`CHARACTER(LEN=*)`, intent(in) *id* )

The documentation for this module was generated from the following file:

- [/home/sander/e2/messy\\_d2.50s\\_rs/messy/mbm/caaba/messy\\_mecca\\_kpp\\_util.f90](#)

## 5.53 messy\_mecca\_tag\_box Module Reference

### Public Member Functions

- subroutine, public [mecca\\_tag\\_emis](#)
- subroutine, public [mecca\\_tag\\_prepare](#) (C)
- subroutine, public [mecca\\_tag\\_process](#) (TSL, C, press, cair, temp)
- subroutine, public [mecca\\_tag\\_resetPTs](#)
- subroutine, public [mecca\\_tag\\_init](#)
- subroutine, public [mecca\\_tag\\_result](#) (model\_time)
- subroutine, public [mecca\\_tag\\_finish](#)

### 5.53.1 Member Function/Subroutine Documentation

5.53.1.1 subroutine, public `messy_mecca_tag_box::mecca_tag_emis` ( )

5.53.1.2 subroutine, public `messy_mecca_tag_box::mecca_tag_finish` ( )

5.53.1.3 subroutine, public `messy_mecca_tag_box::mecca_tag_init` ( )

5.53.1.4 subroutine, public `messy_mecca_tag_box::mecca_tag_prepare` ( `REAL(dp)`,  
dimension(:), intent(in) *C* )

5.53.1.5 subroutine, public `messy_mecca_tag_box::mecca_tag_process` ( `REAL(dp)`,  
intent(in) *TSL*, `REAL(dp)`, dimension(:), intent(in) *C*, `REAL(dp)`, intent(in) *press*,  
`REAL(dp)`, intent(in) *cair*, `REAL(dp)`, intent(in) *temp* )

5.53.1.6 subroutine, public `messy_mecca_tag_box::mecca_tag_resetPTs` ( )

5.53.1.7 subroutine, public `messy_mecca_tag_box::mecca_tag_result` ( `REAL(dp)`,  
intent(in) *model\_time* )

The documentation for this module was generated from the following file:

- [/home/sander/e2/messy\\_d2.50s\\_rs/messy/mbm/caaba/messy\\_mecca\\_tag\\_box.f90](#)

## 5.54 messy\_radjimt Module Reference

### Public Member Functions

- subroutine, public [radjimt\\_read\\_nml\\_ctrl](#) (status, iou)
- subroutine, public [radjimt\\_readfluxes](#) (s2k\_h2o2\_fluxes\_f, O3\_Xsections\_f)
- subroutine, public [MesoSol](#) (m, l, ht\_dim, heatrates, gas1\_1d, gas2\_1d, gas3\_1d, gas\_O3\_1d, gas\_H2O\_1d, gas\_H2O2\_1d, nden1d, csza, r0\_eff, scht1d, temp1d, ht1d, cp1d, den1d, eccentric, f107, pres, mmw\_gas1, mmw\_gas2, GRAV0, l\_reduceO3heating)
- subroutine, public [ThermoSol](#) (m, l, ht\_dim, gas1\_1d, gas2\_1d, gas3\_1d, gas\_O3\_1d, F107, csza, ht1d, heatrates, temp1d, eccentric, cp1d, scht1d, pres, den1d, R0\_eff, nden1d, GRAV0, iou1, iou2)
- subroutine, public [CO2ChapManHeating](#) (m, l, den1d, cp1d, ht1d, ht\_dim, csza, co2\_chap\_heat)
- subroutine, public [BranchingRatios](#) (ht\_dim, pres, htav)

### Public Attributes

- CHARACTER(LEN=\*), parameter, public [modstr](#) = 'radjimt'
- CHARACTER(LEN=\*), parameter, public [modver](#) = '1.0'
- INTEGER, parameter, public [heatcool\\_rates](#) = 9
- INTEGER, parameter, public [ht\\_branches](#) = 17
- REAL(dp), dimension(:,:), allocatable, public [branch](#)
- INTEGER, public [chem\\_heat\\_on](#) = 0
- INTEGER, public [chem\\_heat\\_on\\_last](#) = 0
- REAL(dp), dimension(:,:,:), pointer, public [jx](#)
- REAL(dp), dimension(:), allocatable, public [O2eff\\_bulk](#)
- REAL(dp), dimension(:), allocatable, public [O3eff\\_bulk](#)
- REAL(dp), dimension(:), allocatable, public [htlyeff](#)
- REAL(dp), dimension(:), allocatable, public [euveff](#)
- REAL(dp), dimension(:), allocatable, public [src1eff](#)
- REAL(dp), dimension(:), allocatable, public [PEOP](#)
- REAL(dp), dimension(:), allocatable, public [PEN2](#)
- REAL(dp), dimension(:), allocatable, public [PEO2](#)
- REAL(dp), dimension(:,:), allocatable, public [CSH2O2](#)
- CHARACTER(LEN=STRLEN\_ULONG), public [file\\_sk2\\_h2o2\\_fluxes](#) = "
- CHARACTER(LEN=STRLEN\_ULONG), public [file\\_O3\\_Xsections](#) = "
- CHARACTER(LEN=STRLEN\_ULONG), public [file\\_s2k\\_fluxes](#) = "
- CHARACTER(LEN=STRLEN\_ULONG), public [file\\_all\\_Xsections](#) = "

### Private Member Functions

- subroutine [H2O2\\_photorate](#) (n, m, l, ht\_dim, temp1d, eccentric, gas2\_1d, nden1d, R0\_eff, csza, ht1d, gas\_O3\_1d, gas\_H2O2\_1d, GRAV0)
- subroutine [H2O2\\_cross\\_section](#) (n, NWAVES\_fuv, WAVELENGTHS\_fuv, temp1d, [CS-H2O2](#))
- subroutine [S2K\\_FLUXES](#) (f107, eccentric, CSAO, CSIO, CSAO2, CSIO2, CSAN2, CSIN2, FLUX, WAVELENGTHS, lyman\_a\_flux, NWAVES\_XRAY\_OUT, NWAVES\_SRC\_OUT, NWAVES\_EUV\_OUT, lyman\_a\_num, s2k\_fluxes\_f, all\_Xsections\_f)
- subroutine [CMAT1\\_FLUXES](#) (f107, eccentric, CSAO, CSIO, CSAO2, CSIO2, CSAN2, CSIN2, FLUX, WAVELENGTHS, lyman\_a\_flux, NWAVES\_XRAY\_OUT, NWAVES\_SRC\_OUT, NWAVES\_EUV\_OUT, lyman\_a\_num)
- subroutine [S2K\\_INTERP](#) (S2K\_ALLFLUXES, F107\_in, S2K\_FLUX)
- subroutine [H2O\\_IR](#) (T, HT, Z)
- subroutine [Secondaries](#) (m, l, ht\_dim, ht1d, pres)
- REAL(dp) function [Chapmann](#) (coszen, scht, ht)

### Private Attributes

- INTEGER, parameter [total\\_heat\\_l](#) = 1
- INTEGER, parameter [o3\\_chap\\_heat\\_l](#) = 2
- INTEGER, parameter [o3\\_hart\\_heat\\_l](#) = 3
- INTEGER, parameter [o3\\_hugg\\_heat\\_l](#) = 4
- INTEGER, parameter [o3\\_herz\\_heat\\_l](#) = 5
- INTEGER, parameter [o2\\_meso\\_heat\\_l](#) = 6
- INTEGER, parameter [euv\\_heat\\_l](#) = 7
- INTEGER, parameter [uv\\_heat\\_l](#) = 8
- INTEGER, parameter [total\\_cool\\_l](#) = 1
- INTEGER, parameter [co2\\_cool\\_l](#) = 2
- INTEGER, parameter [o3\\_cool\\_l](#) = 3
- INTEGER, parameter [o\\_cool\\_l](#) = 4
- INTEGER, parameter [no\\_cool\\_l](#) = 5
- INTEGER [b\\_aurqo2\\_b1](#) = 1
- INTEGER [b\\_aurqo2\\_b2](#) = 2
- INTEGER [b\\_aurqn2\\_b1](#) = 3
- INTEGER [b\\_aurqn2\\_b2](#) = 4
- INTEGER [b\\_aurqn2\\_b3](#) = 5
- INTEGER [b\\_aurqn2\\_b4](#) = 6
- INTEGER [b\\_jio2\\_b1](#) = 7
- INTEGER [b\\_jio2\\_b2](#) = 8
- INTEGER [b\\_jin2\\_b1](#) = 9
- INTEGER [b\\_jin2\\_b2](#) = 10
- INTEGER [b\\_jin2\\_b3](#) = 11
- INTEGER [b\\_sen2\\_b1](#) = 12
- INTEGER [b\\_sen2\\_b2](#) = 13
- INTEGER [b\\_sen2\\_b3](#) = 14

- INTEGER `b_sen2_b4` = 15
- INTEGER `b_seo2_b1` = 16
- INTEGER `b_seo2_b2` = 17
- INTEGER `maxn` = -1
- INTEGER `minn` = 1000
- INTEGER, parameter `NWAVES_FUV` = 92
- REAL(dp) `S2K_h2o2_ALLFLUXES`
- REAL(dp) `S2K_FLUX_FUV`
- REAL(dp) `WAVELS_FUV`
- REAL(dp) `CSAO3`
- REAL(dp), parameter `GSCON` =  $R_{\text{gas}} \times 1.e3\_dp$

### 5.54.1 Member Function/Subroutine Documentation

- 5.54.1.1 subroutine, public `messy_radjimt::BranchingRatios` ( INTEGER, intent(in) *ht\_dim*, REAL(dp), dimension(ht\_dim) *pres*, REAL(dp), dimension(ht\_dim) *htav* )
- 5.54.1.2 REAL(dp) function `messy_radjimt::Chapmann` ( REAL(dp), intent(in) *coszen*, REAL(dp), intent(in) *scht*, REAL(dp), intent(in) *ht* ) [private]
- 5.54.1.3 subroutine `messy_radjimt::CMAT1_FLUXES` ( REAL(dp) *f107*, REAL(dp) *eccentric*, REAL(dp), dimension(nwaves) *CSAO*, REAL(dp), dimension(nwaves) *CSIO*, REAL(dp), dimension(nwaves) *CSAO2*, REAL(dp), dimension(nwaves) *CSIO2*, REAL(dp), dimension(nwaves) *CSAN2*, REAL(dp), dimension(nwaves) *CSIN2*, REAL(dp), dimension(nwaves) *FLUX*, REAL(dp), dimension(nwaves) *WAVELS*, REAL(dp) *lyman\_a\_flux*, INTEGER *NWAVES\_XRAY\_OUT*, INTEGER *NWAVES\_SRC\_OUT*, INTEGER *NWAVES\_EUV\_OUT*, INTEGER *lyman\_a\_num* ) [private]
- 5.54.1.4 subroutine, public `messy_radjimt::CO2ChapManHeating` ( INTEGER, intent(in) *m*, INTEGER, intent(in) *I*, REAL(dp), dimension(ht\_dim), intent(in) *den1d*, REAL(dp), dimension(ht\_dim), intent(in) *cp1d*, REAL(dp), dimension(ht\_dim), intent(in) *ht1d*, INTEGER, intent(in) *ht\_dim*, REAL(dp), intent(in) *csza*, REAL(dp), dimension(ht\_dim), intent(out) *co2\_chap\_heat* )
- 5.54.1.5 subroutine `messy_radjimt::H2O2_cross_section` ( INTEGER, intent(in) *n*, INTEGER, intent(in) *NWAVES\_fuv*, REAL(dp), dimension(:), intent(in) *WAVELS\_fuv*, REAL(dp), dimension(:), intent(in) *temp1d*, REAL(dp), dimension(:,:), intent(inout) *CSH2O2* ) [private]
- 5.54.1.6 subroutine `messy_radjimt::H2O2_photorate` ( INTEGER, intent(in) *n*, INTEGER, intent(in) *m*, INTEGER, intent(in) *I*, INTEGER, intent(in) *ht\_dim*, REAL(dp), dimension(ht\_dim), intent(in) *temp1d*, REAL(dp), intent(in) *eccentric*, REAL(dp), dimension(ht\_dim), intent(in) *gas2\_1d*, REAL(dp), dimension(ht\_dim), intent(in) *nden1d*, REAL(dp), dimension(ht\_dim), intent(in) *R0\_eff*, REAL(dp), intent(in) *csza*, REAL(dp), dimension(ht\_dim), intent(in) *ht1d*, REAL(dp), dimension(ht\_dim), intent(in) *gas\_O3\_1d*, REAL(dp), dimension(ht\_dim), intent(in) *gas\_H2O2\_1d*, REAL(dp), intent(in) *GRAV0* ) [private]

- 5.54.1.7 subroutine `messy_radjimt::H2O_IR` ( `REAL`, `dimension(nlong,nlat,nhght)` *T*, `REAL`, `dimension(nlong,nlat,nhght)` *HT*, `REAL`, `dimension(nhght)` *Z* ) `[private]`
- 5.54.1.8 subroutine, public `messy_radjimt::MesoSol` ( `INTEGER`, `intent(in)` *m*, `INTEGER`, `intent(in)` *l*, `INTEGER`, `intent(in)` *ht\_dim*, `REAL(dp)`, `dimension(:, :, :)`, pointer *heatrates*, `REAL(dp)`, `dimension(ht_dim)`, `intent(in)` *gas1\_1d*, `REAL(dp)`, `dimension(ht_dim)`, `intent(in)` *gas2\_1d*, `REAL(dp)`, `dimension(ht_dim)`, `intent(in)` *gas3\_1d*, `REAL(dp)`, `dimension(ht_dim)`, `intent(in)` *gas\_O3\_1d*, `REAL(dp)`, `dimension(ht_dim)`, `intent(in)` *gas\_H2O\_1d*, `REAL(dp)`, `dimension(ht_dim)`, `intent(in)` *gas\_H2O2\_1d*, `REAL(dp)`, `dimension(ht_dim)`, `intent(in)` *nden1d*, `REAL(dp)`, `intent(in)` *csza*, `REAL(dp)`, `dimension(ht_dim)`, `intent(in)` *r0\_eff*, `REAL(dp)`, `dimension(ht_dim)`, `intent(in)` *scht1d*, `REAL(dp)`, `dimension(ht_dim)`, `intent(in)` *temp1d*, `REAL(dp)`, `dimension(ht_dim)`, `intent(in)` *ht1d*, `REAL(dp)`, `dimension(ht_dim)`, `intent(in)` *cp1d*, `REAL(dp)`, `dimension(ht_dim)`, `intent(in)` *den1d*, `REAL(dp)`, `intent(in)` *eccentric*, `REAL(dp)`, `intent(in)` *f107*, `REAL(dp)`, `dimension(ht_dim)`, `intent(in)` *pres*, `REAL(dp)`, `intent(in)` *mmw\_gas1*, `REAL(dp)`, `intent(in)` *mmw\_gas2*, `REAL(dp)`, `intent(in)` *GRAV0*, `LOGICAL`, `intent(in)` *l\_reduceO3heating* )
- 5.54.1.9 subroutine, public `messy_radjimt::radjimt_read_nml_ctrl` ( `INTEGER`, `intent(out)` *status*, `INTEGER`, `intent(in)` *iou* )
- 5.54.1.10 subroutine, public `messy_radjimt::radjimt_readfluxes` ( `INTEGER`, `intent(in)` *s2k\_h2o2\_fluxes\_f*, `INTEGER`, `intent(in)` *O3\_Xsections\_f* )
- 5.54.1.11 subroutine `messy_radjimt::S2K_FLUXES` ( `REAL(dp)` *f107*, `REAL(dp)` *eccentric*, `REAL(dp)`, `dimension(nwaves)` *CSAO*, `REAL(dp)`, `dimension(nwaves)` *CSIO*, `REAL(dp)`, `dimension(nwaves)` *CSAO2*, `REAL(dp)`, `dimension(nwaves)` *CSIO2*, `REAL(dp)`, `dimension(nwaves)` *CSAN2*, `REAL(dp)`, `dimension(nwaves)` *CSIN2*, `REAL(dp)`, `dimension(nwaves)` *FLUX*, `REAL(dp)`, `dimension(nwaves)` *WAVELS*, `REAL(dp)` *lyman\_a\_flux*, `INTEGER` *NWAVES\_XRAY\_OUT*, `INTEGER` *NWAVES\_SRC\_OUT*, `INTEGER` *NWAVES\_EUV\_OUT*, `INTEGER` *lyman\_a\_num*, `INTEGER`, `intent(in)` *s2k\_fluxes\_f*, `INTEGER`, `intent(in)` *all\_Xsections\_f* ) `[private]`
- 5.54.1.12 subroutine `messy_radjimt::S2K_INTERP` ( `REAL(dp)`, `dimension(nwaves,nf107s+1)` *S2K\_ALLFLUXES*, `REAL(dp)` *F107\_in*, `REAL(dp)`, `dimension(nwaves)` *S2K\_FLUX* ) `[private]`
- 5.54.1.13 subroutine `messy_radjimt::Secondaries` ( `INTEGER`, `intent(in)` *m*, `INTEGER`, `intent(in)` *l*, `INTEGER`, `intent(in)` *ht\_dim*, `REAL(dp)`, `dimension(ht_dim)`, `intent(in)` *ht1d*, `REAL(dp)`, `dimension(ht_dim)`, `intent(in)` *pres* ) `[private]`



5.54.1.14 subroutine, public messy\_radjimt::ThermoSol ( INTEGER, intent(in) *m*,  
 INTEGER, intent(in) *l*, INTEGER, intent(in) *ht\_dim*, REAL(dp), dimension(ht\_dim),  
 intent(in) *gas1\_1d*, REAL(dp), dimension(ht\_dim), intent(in) *gas2\_1d*, REAL(dp),  
 dimension(ht\_dim), intent(in) *gas3\_1d*, REAL(dp), dimension(ht\_dim), intent(in)  
*gas\_O3\_1d*, REAL(dp), intent(in) *F107*, REAL(dp), intent(in) *csza*, REAL(dp),  
 dimension(ht\_dim), intent(in) *ht1d*, REAL(dp), dimension(:,:,:), pointer *heatrates*,  
 REAL(dp), dimension(ht\_dim), intent(in) *temp1d*, REAL(dp), intent(in) *eccentric*,  
 REAL(dp), dimension(ht\_dim), intent(in) *cp1d*, REAL(dp), dimension(ht\_dim), intent(in)  
*scht1d*, REAL(dp), dimension(ht\_dim), intent(in) *pres*, REAL(dp), dimension(ht\_dim),  
 intent(in) *den1d*, REAL(dp), dimension(ht\_dim), intent(in) *R0\_eff*, REAL(dp),  
 dimension(ht\_dim), intent(in) *nden1d*, REAL(dp), intent(in) *GRAV0*, INTEGER,  
 intent(in) *iou1*, INTEGER, intent(in) *iou2* )

## 5.54.2 Member Data Documentation

5.54.2.1 INTEGER messy\_radjimt::b\_aurqn2\_b1 = 3 [private]

5.54.2.2 INTEGER messy\_radjimt::b\_aurqn2\_b2 = 4 [private]

5.54.2.3 INTEGER messy\_radjimt::b\_aurqn2\_b3 = 5 [private]

5.54.2.4 INTEGER messy\_radjimt::b\_aurqn2\_b4 = 6 [private]

5.54.2.5 INTEGER messy\_radjimt::b\_aurqo2\_b1 = 1 [private]

5.54.2.6 INTEGER messy\_radjimt::b\_aurqo2\_b2 = 2 [private]

5.54.2.7 INTEGER messy\_radjimt::b\_jin2\_b1 = 9 [private]

5.54.2.8 INTEGER messy\_radjimt::b\_jin2\_b2 = 10 [private]

5.54.2.9 INTEGER messy\_radjimt::b\_jin2\_b3 = 11 [private]

5.54.2.10 INTEGER messy\_radjimt::b\_jio2\_b1 = 7 [private]

5.54.2.11 INTEGER messy\_radjimt::b\_jio2\_b2 = 8 [private]

5.54.2.12 INTEGER messy\_radjimt::b\_sen2\_b1 = 12 [private]

5.54.2.13 INTEGER messy\_radjimt::b\_sen2\_b2 = 13 [private]

5.54.2.14 INTEGER messy\_radjimt::b\_sen2\_b3 = 14 [private]

5.54.2.15 INTEGER messy\_radjimt::b\_sen2\_b4 = 15 [private]

5.54.2.16 INTEGER messy\_radjimt::b\_seo2\_b1 = 16 [private]

- 5.54.2.17 INTEGER messy\_radjimt::b\_seo2\_b2 = 17 [private]
- 5.54.2.18 REAL(dp), dimension(:,:), allocatable, public messy\_radjimt::branch
- 5.54.2.19 INTEGER, public messy\_radjimt::chem\_heat\_on = 0
- 5.54.2.20 INTEGER, public messy\_radjimt::chem\_heat\_on\_last = 0
- 5.54.2.21 INTEGER, parameter messy\_radjimt::co2\_cool\_l = 2 [private]
- 5.54.2.22 REAL(dp) messy\_radjimt::CSAO3 [private]
- 5.54.2.23 REAL(dp), dimension(:,:), allocatable, public messy\_radjimt::CSH2O2
- 5.54.2.24 INTEGER, parameter messy\_radjimt::euv\_heat\_l = 7 [private]
- 5.54.2.25 REAL(dp), dimension(:), allocatable, public messy\_radjimt::euveff
- 5.54.2.26 CHARACTER(LEN=STRLEN\_ULONG), public messy\_radjimt::file\_all\_Xsections = "
- 5.54.2.27 CHARACTER(LEN=STRLEN\_ULONG), public messy\_radjimt::file\_O3\_Xsections = "
- 5.54.2.28 CHARACTER(LEN=STRLEN\_ULONG), public messy\_radjimt::file\_s2k\_fluxes = "
- 5.54.2.29 CHARACTER(LEN=STRLEN\_ULONG), public messy\_radjimt::file\_sk2\_h2o2\_fluxes = "
- 5.54.2.30 REAL(dp), parameter messy\_radjimt::GSCON = R\_gas\*1.e3\_dp [private]
- 5.54.2.31 INTEGER, parameter, public messy\_radjimt::heatcool\_rates = 9
- 5.54.2.32 INTEGER, parameter, public messy\_radjimt::ht\_branches = 17
- 5.54.2.33 REAL(dp), dimension(:), allocatable, public messy\_radjimt::htlyeff
- 5.54.2.34 REAL(dp), dimension(:,:,:), pointer, public messy\_radjimt::jx
- 5.54.2.35 INTEGER messy\_radjimt::maxn = -1 [private]
- 5.54.2.36 INTEGER messy\_radjimt::minn = 1000 [private]
- 5.54.2.37 CHARACTER(LEN=\*), parameter, public messy\_radjimt::modstr = 'radjimt'
- 5.54.2.38 CHARACTER(LEN=\*), parameter, public messy\_radjimt::modver = '1.0'

- 5.54.2.39 INTEGER, parameter messy\_radjimt::no\_cool\_l = 5 [private]
- 5.54.2.40 INTEGER, parameter messy\_radjimt::NWAVES\_FUV = 92 [private]
- 5.54.2.41 INTEGER, parameter messy\_radjimt::o2\_meso\_heat\_l = 6 [private]
- 5.54.2.42 REAL(dp), dimension(:), allocatable, public messy\_radjimt::O2eff\_bulk
- 5.54.2.43 INTEGER, parameter messy\_radjimt::o3\_chap\_heat\_l = 2 [private]
- 5.54.2.44 INTEGER, parameter messy\_radjimt::o3\_cool\_l = 3 [private]
- 5.54.2.45 INTEGER, parameter messy\_radjimt::o3\_hart\_heat\_l = 3 [private]
- 5.54.2.46 INTEGER, parameter messy\_radjimt::o3\_hertz\_heat\_l = 5 [private]
- 5.54.2.47 INTEGER, parameter messy\_radjimt::o3\_hugg\_heat\_l = 4 [private]
- 5.54.2.48 REAL(dp), dimension(:), allocatable, public messy\_radjimt::O3eff\_bulk
- 5.54.2.49 INTEGER, parameter messy\_radjimt::o\_cool\_l = 4 [private]
- 5.54.2.50 REAL(dp), dimension(:), allocatable, public messy\_radjimt::PEN2
- 5.54.2.51 REAL(dp), dimension(:), allocatable, public messy\_radjimt::PEO2
- 5.54.2.52 REAL(dp), dimension(:), allocatable, public messy\_radjimt::PEOP
- 5.54.2.53 REAL(dp) messy\_radjimt::S2K\_FLUX\_FUV [private]
- 5.54.2.54 REAL(dp) messy\_radjimt::S2K\_h2o2\_ALLFLUXES [private]
- 5.54.2.55 REAL(dp), dimension(:), allocatable, public messy\_radjimt::src1eff
- 5.54.2.56 INTEGER, parameter messy\_radjimt::total\_cool\_l = 1 [private]
- 5.54.2.57 INTEGER, parameter messy\_radjimt::total\_heat\_l = 1 [private]
- 5.54.2.58 INTEGER, parameter messy\_radjimt::uv\_heat\_l = 8 [private]
- 5.54.2.59 REAL(dp) messy\_radjimt::WAVELS\_FUV [private]

The documentation for this module was generated from the following file:

- /home/sander/e2/messy\_d2.50s\_rs/messy/mbm/caaba/[messy\\_radjimt.f90](#)

## 5.55 messy\_radjimt\_box Module Reference

### Public Member Functions

- subroutine, public [radjimt\\_init](#)
- subroutine, public [radjimt\\_physc](#)
- subroutine, public [radjimt\\_finish](#)
- subroutine, public [radjimt\\_result](#)

### Private Attributes

- INTEGER [ncid\\_radjimt](#)
- INTEGER [nlev](#)
- INTEGER, parameter [jrow](#) = 1
- REAL(DP), dimension(:, :, :), pointer [heatrates](#)
- REAL(dp), dimension(:), allocatable [jpress](#)
- REAL(dp), dimension(:), allocatable [nd\\_gas1\\_1d](#)
- REAL(dp), dimension(:), allocatable [nd\\_gas2\\_1d](#)
- REAL(dp), dimension(:), allocatable [nd\\_gas3\\_1d](#)
- REAL(dp), dimension(:), allocatable [gas\\_O3\\_1d](#)
- REAL(dp), dimension(:), allocatable [gas\\_H2O\\_1d](#)
- REAL(dp), dimension(:), allocatable [gas\\_H2O2\\_1d](#)
- REAL(dp), dimension(:), allocatable [nden1d](#)
- REAL(dp), dimension(:), allocatable [r0\\_eff](#)
- REAL(dp), dimension(:), allocatable [scht1d](#)
- REAL(dp), dimension(:), allocatable [temp1d](#)
- REAL(dp), dimension(:), allocatable [ht1d](#)
- REAL(dp), dimension(:), allocatable [cp1d](#)
- REAL(dp), dimension(:), allocatable [den1d](#)
- REAL(dp) [eccentric](#)
- REAL(dp) [f107](#)
- REAL(dp) [mmw\\_gas1](#) = 16.
- REAL(dp) [mmw\\_gas2](#) = 32.
- REAL(dp) [GRAV0](#) = 9.5
- LOGICAL [I\\_heating](#)
- LOGICAL [I\\_reduceO3heating](#)

### 5.55.1 Member Function/Subroutine Documentation

#### 5.55.1.1 subroutine, public messy\_radjimt\_box::radjimt\_finish ( )

## 5.55.1.2 subroutine, public messy\_radjimt\_box::radjimt\_init ( )

Here is the call graph for this function:

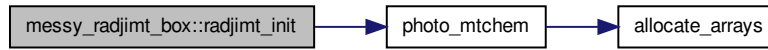

## 5.55.1.3 subroutine, public messy\_radjimt\_box::radjimt\_physc ( )

## 5.55.1.4 subroutine, public messy\_radjimt\_box::radjimt\_result ( )

## 5.55.2 Member Data Documentation

5.55.2.1 REAL(dp), dimension(:), allocatable messy\_radjimt\_box::cp1d [private]

5.55.2.2 REAL(dp), dimension(:), allocatable messy\_radjimt\_box::den1d [private]

5.55.2.3 REAL(dp) messy\_radjimt\_box::eccentric [private]

5.55.2.4 REAL(dp) messy\_radjimt\_box::f107 [private]

5.55.2.5 REAL(dp), dimension(:), allocatable messy\_radjimt\_box::gas\_H2O2\_1d [private]

5.55.2.6 REAL(dp), dimension(:), allocatable messy\_radjimt\_box::gas\_H2O\_1d [private]

5.55.2.7 REAL(dp), dimension(:), allocatable messy\_radjimt\_box::gas\_O3\_1d [private]

5.55.2.8 REAL(dp) messy\_radjimt\_box::GRAV0 = 9.5 [private]

5.55.2.9 REAL(DP), dimension(:, :, :), pointer messy\_radjimt\_box::heatrates [private]

5.55.2.10 REAL(dp), dimension(:), allocatable messy\_radjimt\_box::ht1d [private]

5.55.2.11 REAL(dp), dimension(:), allocatable messy\_radjimt\_box::jpress [private]

5.55.2.12 INTEGER, parameter messy\_radjimt\_box::jrow = 1 [private]

- 5.55.2.13 LOGICAL messy\_radjimt\_box::l\_heating [private]
- 5.55.2.14 LOGICAL messy\_radjimt\_box::l\_reduceO3heating [private]
- 5.55.2.15 REAL(dp) messy\_radjimt\_box::mmw\_gas1 = 16. [private]
- 5.55.2.16 REAL(dp) messy\_radjimt\_box::mmw\_gas2 = 32. [private]
- 5.55.2.17 INTEGER messy\_radjimt\_box::ncid\_radjimt [private]
- 5.55.2.18 REAL(dp), dimension(:), allocatable messy\_radjimt\_box::nd\_gas1\_1d  
[private]
- 5.55.2.19 REAL(dp), dimension(:), allocatable messy\_radjimt\_box::nd\_gas2\_1d  
[private]
- 5.55.2.20 REAL(dp), dimension(:), allocatable messy\_radjimt\_box::nd\_gas3\_1d  
[private]
- 5.55.2.21 REAL(dp), dimension(:), allocatable messy\_radjimt\_box::nden1d  
[private]
- 5.55.2.22 INTEGER messy\_radjimt\_box::nlev [private]
- 5.55.2.23 REAL(dp), dimension(:), allocatable messy\_radjimt\_box::r0\_eff [private]
- 5.55.2.24 REAL(dp), dimension(:), allocatable messy\_radjimt\_box::scht1d  
[private]
- 5.55.2.25 REAL(dp), dimension(:), allocatable messy\_radjimt\_box::temp1d  
[private]

The documentation for this module was generated from the following file:

- /home/sander/e2/messy\_d2.50s\_rs/messy/mbm/caaba/[messy\\_radjimt\\_box.f90](#)

## 5.56 messy\_readj Module Reference

### Public Attributes

- REAL(DP), dimension(ip\_max), save, public [jx](#)

### 5.56.1 Member Data Documentation

#### 5.56.1.1 REAL(DP), dimension(ip\_max), save, public messy\_readj::jx

The documentation for this module was generated from the following file:

- /home/sander/e2/messy\_d2.50s\_rs/messy/mbm/caaba/[messy\\_readj.f90](#)

## 5.57 messy\_readj\_box Module Reference

### Public Member Functions

- subroutine, public [readj\\_init](#)

#### 5.57.1 Member Function/Subroutine Documentation

##### 5.57.1.1 subroutine, public messy\_readj\_box::readj\_init ( )

The documentation for this module was generated from the following file:

- /home/sander/e2/messy\_d2.50s\_rs/messy/mbm/caaba/[messy\\_readj\\_box.f90](#)

## 5.58 messy\_sappho Module Reference

### Public Member Functions

- subroutine, public [jvalues](#) (cossza, photo\_scenario, rad\_lat, photon)

### Public Attributes

- CHARACTER(LEN=\*), parameter, public [modstr](#) = 'sappho'
- REAL(DP), dimension(ip\_max), save, public [jx](#)

#### 5.58.1 Member Function/Subroutine Documentation

5.58.1.1 subroutine, public `messy_sappho::jvalues` ( `REAL(DP)`, intent(in) *cosssa*,  
`CHARACTER(LEN=12)`, intent(in) *photo\_scenario*, `REAL(DP)`, intent(in) *rad\_lat*,  
`REAL(DP)`, intent(out) *photon* )

Here is the call graph for this function:

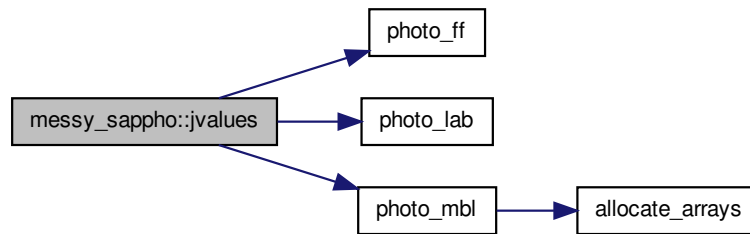

## 5.58.2 Member Data Documentation

5.58.2.1 `REAL(DP)`, dimension(ip\_max), save, public `messy_sappho::jx`

5.58.2.2 `CHARACTER(LEN=*)`, parameter, public `messy_sappho::modstr` = 'sappho'

The documentation for this module was generated from the following file:

- [/home/sander/e2/messy\\_d2.50s\\_rs/messy/mbm/caaba/messy\\_sappho.f90](#)

## 5.59 messy\_sappho\_box Module Reference

### Public Member Functions

- subroutine, public [sappho\\_init](#)
- subroutine, public [sappho\\_physc](#)
- subroutine, public [sappho\\_finish](#)
- subroutine, public [sappho\\_result](#)

### Public Attributes

- INTEGER [ncid\\_sappho](#)
- `REAL(DP)` [photon](#)



### 5.59.1 Member Function/Subroutine Documentation

5.59.1.1 subroutine, public messy\_sappho\_box::sappho\_finish ( )

5.59.1.2 subroutine, public messy\_sappho\_box::sappho\_init ( )

5.59.1.3 subroutine, public messy\_sappho\_box::sappho\_physc ( )

5.59.1.4 subroutine, public messy\_sappho\_box::sappho\_result ( )

### 5.59.2 Member Data Documentation

5.59.2.1 INTEGER messy\_sappho\_box::ncid\_sappho

5.59.2.2 REAL(DP) messy\_sappho\_box::photon

The documentation for this module was generated from the following file:

- /home/sander/e2/messy\_d2.50s\_rs/messy/mbm/caaba/[messy\\_sappho\\_box.f90](#)

## 5.60 messy\_semidep\_box Module Reference

### Public Member Functions

- subroutine, public [semidep\\_physc](#)

### Private Member Functions

- subroutine [emission](#)
- subroutine [drydep](#)

### 5.60.1 Member Function/Subroutine Documentation

### 5.60.1.1 subroutine `messy_semidep_box::drydep( )` [private]

Here is the call graph for this function:

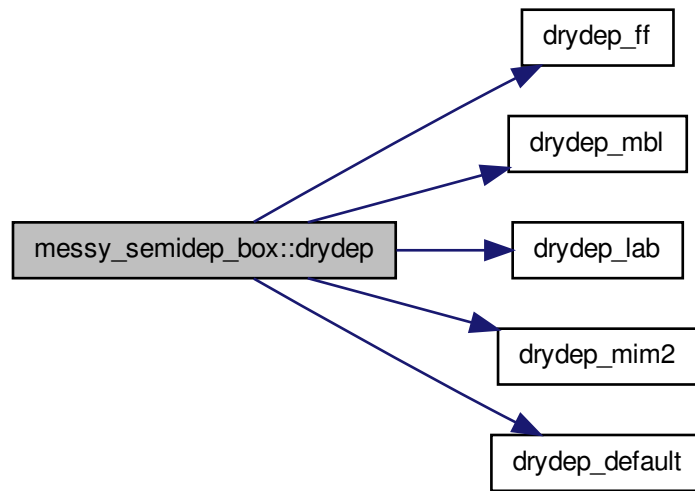

### 5.60.1.2 subroutine messy\_semidep\_box::emission ( ) [private]

Here is the call graph for this function:

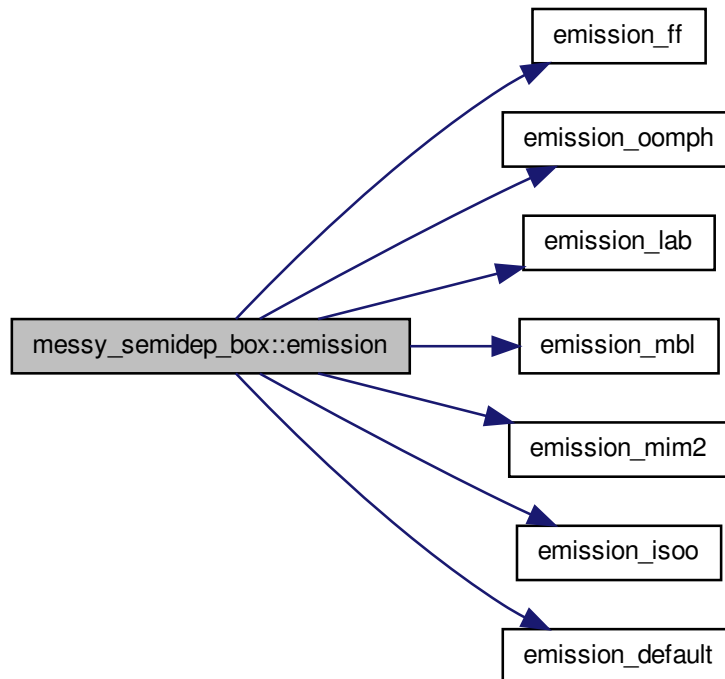

### 5.60.1.3 subroutine, public messy\_semidep\_box::semidep\_physc ( )

The documentation for this module was generated from the following file:

- [/home/sander/e2/messy\\_d2.50s\\_rs/messy/mbm/caaba/messy\\_semidep\\_box.-f90](#)

## 5.61 messy\_traject\_box Module Reference

### Public Member Functions

- subroutine [get\\_model\\_start\\_end](#)

- subroutine [get\\_physc\\_data](#)
- subroutine [traject\\_init](#)
- subroutine [traject\\_result](#)
- subroutine [traject\\_finish](#)
- subroutine [traject\\_physc](#)

### Public Attributes

- INTEGER [dimid\\_time](#)
- INTEGER [len\\_time](#)
- INTEGER [varid\\_time](#)
- INTEGER [varid\\_press](#)
- INTEGER [varid\\_relhum](#)
- INTEGER [varid\\_temp](#)
- INTEGER [varid\\_lat](#)
- INTEGER [varid\\_lon](#)
- INTEGER [varid\\_jno2](#)
- INTEGER [ncid\\_physc](#)
- INTEGER [ncid\\_traj](#)
- INTEGER [ncid\\_jval](#)
- INTEGER [trajpct](#)
- INTEGER [intpct](#) = 1
- REAL(dp) [timesteplen\\_orig](#)
- LOGICAL [l\\_next\\_trajp](#)
- REAL(dp) [ratio1](#)
- REAL(dp) [ratio2](#)
- REAL(dp) [lontmp](#)
- REAL(dp) [time1](#)
- REAL(dp) [time2](#)
- REAL(dp) [relhum1](#)
- REAL(dp) [relhum2](#)
- REAL(dp) [temp1](#)
- REAL(dp) [temp2](#)
- REAL(dp) [press1](#)
- REAL(dp) [press2](#)
- REAL(dp) [lat1](#)
- REAL(dp) [lat2](#)
- REAL(dp) [lon1](#)
- REAL(dp) [lon2](#)
- REAL(dp) [cair\\_old](#)
- REAL(dp) [jno21](#)
- REAL(dp) [jno22](#)

### 5.61.1 Member Function/Subroutine Documentation

5.61.1.1 subroutine messy\_traject\_box::get\_model\_start\_end ( )

5.61.1.2 subroutine messy\_traject\_box::get\_physc\_data ( )

5.61.1.3 subroutine messy\_traject\_box::traject\_finish ( )

5.61.1.4 subroutine messy\_traject\_box::traject\_init ( )

5.61.1.5 subroutine messy\_traject\_box::traject\_physc ( )

5.61.1.6 subroutine messy\_traject\_box::traject\_result ( )

### 5.61.2 Member Data Documentation

5.61.2.1 REAL(dp) messy\_traject\_box::cair\_old

5.61.2.2 INTEGER messy\_traject\_box::dimid\_time

5.61.2.3 INTEGER messy\_traject\_box::intpct = 1

5.61.2.4 REAL(dp) messy\_traject\_box::jno21

5.61.2.5 REAL(dp) messy\_traject\_box::jno22

5.61.2.6 LOGICAL messy\_traject\_box::l\_next\_trajp

5.61.2.7 REAL(dp) messy\_traject\_box::lat1

5.61.2.8 REAL(dp) messy\_traject\_box::lat2

5.61.2.9 INTEGER messy\_traject\_box::len\_time

5.61.2.10 REAL(dp) messy\_traject\_box::lon1

5.61.2.11 REAL(dp) messy\_traject\_box::lon2

5.61.2.12 REAL(dp) messy\_traject\_box::lontmp

5.61.2.13 INTEGER messy\_traject\_box::ncid\_jval

5.61.2.14 INTEGER messy\_traject\_box::ncid\_physc

5.61.2.15 INTEGER messy\_traject\_box::ncid\_traj

5.61.2.16 REAL(dp) messy\_traject\_box::press1

- 5.61.2.17 REAL(dp) messy\_traject\_box::press2
- 5.61.2.18 REAL(dp) messy\_traject\_box::ratio1
- 5.61.2.19 REAL(dp) messy\_traject\_box::ratio2
- 5.61.2.20 REAL(dp) messy\_traject\_box::relhum1
- 5.61.2.21 REAL(dp) messy\_traject\_box::relhum2
- 5.61.2.22 REAL(dp) messy\_traject\_box::temp1
- 5.61.2.23 REAL(dp) messy\_traject\_box::temp2
- 5.61.2.24 REAL(dp) messy\_traject\_box::time1
- 5.61.2.25 REAL(dp) messy\_traject\_box::time2
- 5.61.2.26 REAL(dp) messy\_traject\_box::timesteplen\_orig
- 5.61.2.27 INTEGER messy\_traject\_box::trajpct
- 5.61.2.28 INTEGER messy\_traject\_box::varid\_jno2
- 5.61.2.29 INTEGER messy\_traject\_box::varid\_lat
- 5.61.2.30 INTEGER messy\_traject\_box::varid\_lon
- 5.61.2.31 INTEGER messy\_traject\_box::varid\_press
- 5.61.2.32 INTEGER messy\_traject\_box::varid\_relhum
- 5.61.2.33 INTEGER messy\_traject\_box::varid\_temp
- 5.61.2.34 INTEGER messy\_traject\_box::varid\_time

The documentation for this module was generated from the following file:

- /home/sander/e2/messy\_d2.50s\_rs/messy/mbm/caaba/[messy\\_traject\\_box.f90](#)

## 5.62 messy\_main\_rnd\_mtw\_ja::mod\_by\_x Interface Reference

### Private Member Functions

- subroutine [gf2x\\_mod\\_by\\_x](#) (c, a, i)

### 5.62.1 Member Function/Subroutine Documentation

5.62.1.1 subroutine messy\_main\_rnd\_mtw\_ja::mod\_by\_x::gf2x\_mod\_by\_x (   
 type(gf2x\_obj), intent(inout) c, type(gf2x\_obj), intent(in) a, integer(INT32),   
 intent(in) i ) [private]

The documentation for this interface was generated from the following file:

- /home/sander/e2/messy\_d2.50s\_rs/messy/mbm/caaba/messy\_main\_rnd\_mtw\_ja.f90

## 5.63 messy\_main\_rnd\_mtw\_ja::mult Interface Reference

### Private Member Functions

- recursive subroutine [gf2x\\_mult\\_kara](#) (c, a, b)

### 5.63.1 Member Function/Subroutine Documentation

5.63.1.1 recursive subroutine messy\_main\_rnd\_mtw\_ja::mult::gf2x\_mult\_kara (   
 type(gf2x\_obj), intent(inout) c, type(gf2x\_obj), intent(in) a, type(gf2x\_obj),   
 intent(in) b ) [private]

The documentation for this interface was generated from the following file:

- /home/sander/e2/messy\_d2.50s\_rs/messy/mbm/caaba/messy\_main\_rnd\_mtw\_ja.f90

## 5.64 messy\_main\_rnd\_mtw\_ja::mult\_assign Interface Reference

### Private Member Functions

- subroutine [gf2x\\_mult\\_assign\\_kara](#) (a, b)

### 5.64.1 Member Function/Subroutine Documentation

5.64.1.1 subroutine messy\_main\_rnd\_mtw\_ja::mult\_assign::gf2x\_mult\_assign\_kara (   
 type(gf2x\_obj), intent(inout) a, type(gf2x\_obj), intent(in) b )   
 [private]

The documentation for this interface was generated from the following file:

- /home/sander/e2/messy\_d2.50s\_rs/messy/mbm/caaba/messy\_main\_rnd\_mtw\_ja.f90

## 5.65 messy\_main\_rnd\_mtw\_ja::mult\_by\_x Interface Reference

### Private Member Functions

- subroutine [gf2x\\_mult\\_by\\_x](#) (c, a, i)

### 5.65.1 Member Function/Subroutine Documentation

5.65.1.1 subroutine messy\_main\_rnd\_mtw\_ja::mult\_by\_x::gf2x\_mult\_by\_x ( type(gf2x\_obj), intent(inout) c, type(gf2x\_obj), intent(in) a, integer(INT32), intent(in) i ) [private]

The documentation for this interface was generated from the following file:

- /home/sander/e2/messy\_d2.50s\_rs/messy/mbm/caaba/[messy\\_main\\_rnd\\_mtw\\_ja.f90](#)

## 5.66 messy\_main\_rnd\_mtw\_ja::new Interface Reference

### Private Member Functions

- subroutine [gf2x\\_new](#) (this, deg)
- subroutine [gf2x\\_delete\\_prime](#) (mp)

### 5.66.1 Member Function/Subroutine Documentation

5.66.1.1 subroutine messy\_main\_rnd\_mtw\_ja::new::gf2x\_delete\_prime ( type(gf2x\_prime\_obj), intent(inout) mp ) [private]

5.66.1.2 subroutine messy\_main\_rnd\_mtw\_ja::new::gf2x\_new ( type(gf2x\_obj), intent(inout) this, integer(INT32), intent(in) deg ) [private]

The documentation for this interface was generated from the following file:

- /home/sander/e2/messy\_d2.50s\_rs/messy/mbm/caaba/[messy\\_main\\_rnd\\_mtw\\_ja.f90](#)

## 5.67 messy\_main\_rnd\_mtw\_ja::pow Interface Reference

### Private Member Functions

- subroutine [gf2x\\_pow](#) (c, a, e)
- subroutine [gf2x\\_pow\\_mod](#) (c, a, e, m)



### 5.67.1 Member Function/Subroutine Documentation

5.67.1.1 subroutine messy\_main\_rnd\_mtw\_ja::pow::gf2x\_pow ( type(gf2x\_obj),  
intent(inout) c, type(gf2x\_obj), intent(in) a, integer(INT32), intent(in) e )  
[private]

5.67.1.2 subroutine messy\_main\_rnd\_mtw\_ja::pow::gf2x\_pow\_mod (  
type(gf2x\_obj), intent(inout) c, type(gf2x\_obj), intent(in) a, integer(INT32),  
intent(in) e, type(gf2x\_prime\_obj), intent(in) m ) [private]

The documentation for this interface was generated from the following file:

- [/home/sander/e2/messy\\_d2.50s\\_rs/messy/mbm/caaba/messy\\_main\\_rnd\\_mtw\\_ja.f90](#)

## 5.68 messy\_main\_rnd\_mtw\_ja::print\_bit Interface Reference

### Private Member Functions

- subroutine [gf2x\\_print\\_bit](#) (this)

### 5.68.1 Member Function/Subroutine Documentation

5.68.1.1 subroutine messy\_main\_rnd\_mtw\_ja::print\_bit::gf2x\_print\_bit (  
type(gf2x\_obj), intent(in) this ) [private]

The documentation for this interface was generated from the following file:

- [/home/sander/e2/messy\\_d2.50s\\_rs/messy/mbm/caaba/messy\\_main\\_rnd\\_mtw\\_ja.f90](#)

## 5.69 messy\_main\_rnd\_mtw\_ja::print\_hex Interface Reference

### Private Member Functions

- subroutine [gf2x\\_print\\_hex](#) (this)

### 5.69.1 Member Function/Subroutine Documentation

5.69.1.1 subroutine messy\_main\_rnd\_mtw\_ja::print\_hex::gf2x\_print\_hex (  
type(gf2x\_obj), intent(in) this ) [private]

The documentation for this interface was generated from the following file:

- [/home/sander/e2/messy\\_d2.50s\\_rs/messy/mbm/caaba/messy\\_main\\_rnd\\_mtw\\_-ja.f90](#)

## 5.70 messy\_main\_tools::PTR\_0D\_ARRAY Type Reference

### Private Attributes

- REAL(DP), pointer [PTR](#)

### 5.70.1 Member Data Documentation

#### 5.70.1.1 REAL(DP), pointer messy\_main\_tools::PTR\_0D\_ARRAY::PTR [private]

The documentation for this type was generated from the following file:

- [/home/sander/e2/messy\\_d2.50s\\_rs/messy/mbm/caaba/messy\\_main\\_tools.f90](#)

## 5.71 messy\_main\_tools::PTR\_1D\_ARRAY Type Reference

### Private Attributes

- REAL(DP), dimension(:), pointer [PTR](#)

### 5.71.1 Member Data Documentation

#### 5.71.1.1 REAL(DP), dimension(:), pointer messy\_main\_tools::PTR\_1D\_ARRAY::PTR [private]

The documentation for this type was generated from the following file:

- [/home/sander/e2/messy\\_d2.50s\\_rs/messy/mbm/caaba/messy\\_main\\_tools.f90](#)

## 5.72 messy\_main\_tools::PTR\_1D\_ARRAY\_INT Type Reference

### Private Attributes

- INTEGER, dimension(:), pointer [PTR](#)

### 5.72.1 Member Data Documentation

5.72.1.1 INTEGER, dimension(:), pointer messy\_main\_tools::PTR\_1D\_ARRAY\_INT::PTR [private]

The documentation for this type was generated from the following file:

- /home/sander/e2/messy\_d2.50s\_rs/messy/mbm/caaba/messy\_main\_tools.f90

## 5.73 messy\_main\_tools::PTR\_2D\_ARRAY Type Reference

### Private Attributes

- REAL(DP), dimension(:, :), pointer PTR

### 5.73.1 Member Data Documentation

5.73.1.1 REAL(DP), dimension(:, :), pointer messy\_main\_tools::PTR\_2D\_ARRAY::PTR [private]

The documentation for this type was generated from the following file:

- /home/sander/e2/messy\_d2.50s\_rs/messy/mbm/caaba/messy\_main\_tools.f90

## 5.74 messy\_main\_tools::PTR\_3D\_ARRAY Type Reference

### Private Attributes

- REAL(DP), dimension(:, :, :), pointer PTR

### 5.74.1 Member Data Documentation

5.74.1.1 REAL(DP), dimension(:, :, :), pointer messy\_main\_tools::PTR\_3D\_ARRAY::PTR [private]

The documentation for this type was generated from the following file:

- /home/sander/e2/messy\_d2.50s\_rs/messy/mbm/caaba/messy\_main\_tools.f90

## 5.75 messy\_main\_tools::PTR\_4D\_ARRAY Type Reference

### Private Attributes

- REAL(DP), dimension(:,:,:), pointer [PTR](#)

### 5.75.1 Member Data Documentation

5.75.1.1 REAL(DP), dimension(:,:,:), pointer messy\_main\_tools::PTR\_4D\_ARRAY::PTR  
[private]

The documentation for this type was generated from the following file:

- /home/sander/e2/messy\_d2.50s\_rs/messy/mbm/caaba/[messy\\_main\\_tools.f90](#)

## 5.76 messy\_main\_tools::PTR\_5D\_ARRAY Type Reference

### Private Attributes

- REAL(DP), dimension(:,:,:), pointer [PTR](#)

### 5.76.1 Member Data Documentation

5.76.1.1 REAL(DP), dimension(:,:,:), pointer messy\_main\_tools::PTR\_5D\_ARRAY::PTR  
[private]

The documentation for this type was generated from the following file:

- /home/sander/e2/messy\_d2.50s\_rs/messy/mbm/caaba/[messy\\_main\\_tools.f90](#)

## 5.77 messy\_main\_rnd\_mtw\_ja::rem Interface Reference

### Private Member Functions

- subroutine [gf2x\\_rem](#) (r, a, b)
- subroutine [gf2x\\_rem\\_barrett](#) (r, a, m)

### 5.77.1 Member Function/Subroutine Documentation

5.77.1.1 subroutine messy\_main\_rnd\_mtw\_ja::rem::gf2x\_rem ( type(gf2x\_obj),  
intent(inout) r, type(gf2x\_obj), intent(in) a, type(gf2x\_obj), intent(in) b )  
[private]

5.77.1.2 subroutine messy\_main\_rnd\_mtw\_ja::rem::gf2x\_rem\_barrett (  
 type(gf2x\_obj), intent(inout) *r*, type(gf2x\_obj), intent(in) *a*, type(gf2x\_prime\_obj),  
 intent(in) *m* ) [private]

The documentation for this interface was generated from the following file:

- /home/sander/e2/messy\_d2.50s\_rs/messy/mbm/caaba/messy\_main\_rnd\_mtw\_ja.f90

## 5.78 messy\_main\_tools::remap\_bounds Interface Reference

### Private Member Functions

- REAL(dp) function, dimension(:), pointer [remap\\_bounds1](#) (*lb1*, array)
- REAL(dp) function, dimension(:, :), pointer [remap\\_bounds2](#) (*lb1*, *lb2*, array)
- REAL(dp) function, dimension(:, :, :), pointer [remap\\_bounds3](#) (*lb1*, *lb2*, *lb3*, array)
- REAL(dp) function, dimension(:, :, :, :), pointer [remap\\_bounds4](#) (*lb1*, *lb2*, *lb3*, *lb4*, array)

### 5.78.1 Member Function/Subroutine Documentation

5.78.1.1 REAL(dp) function, dimension(:), pointer messy\_main\_tools::remap\_bounds::remap\_bounds1 ( INTEGER, intent(in) *lb1*, REAL(dp), dimension(*lb1*:), intent(in), target *array* ) [private]

5.78.1.2 REAL(dp) function, dimension(:, :), pointer messy\_main\_tools::remap\_bounds::remap\_bounds2 ( INTEGER, intent(in) *lb1*, INTEGER, intent(in) *lb2*, REAL(dp), dimension(*lb1*:, *lb2*:), intent(in), target *array* ) [private]

5.78.1.3 REAL(dp) function, dimension(:, :, :), pointer messy\_main\_tools::remap\_bounds::remap\_bounds3 ( INTEGER, intent(in) *lb1*, INTEGER, intent(in) *lb2*, INTEGER, intent(in) *lb3*, REAL(dp), dimension(*lb1*:, *lb2*:, *lb3*:), intent(in), target *array* ) [private]

5.78.1.4 REAL(dp) function, dimension(:, :, :, :), pointer messy\_main\_tools::remap\_bounds::remap\_bounds4 ( INTEGER, intent(in) *lb1*, INTEGER, intent(in) *lb2*, INTEGER, intent(in) *lb3*, INTEGER, intent(in) *lb4*, REAL(dp), dimension(*lb1*:, *lb2*:, *lb3*:, *lb4*:), intent(in), target *array* ) [private]

The documentation for this interface was generated from the following file:

- /home/sander/e2/messy\_d2.50s\_rs/messy/mbm/caaba/messy\_main\_tools.f90

## 5.79 messy\_main\_rnd::rnd\_jump Interface Reference

## Private Member Functions

- subroutine [rnd\\_jump\\_n](#) (status, id, n, get)
- subroutine [rnd\\_jump\\_2](#) (status, id, n, p, get)

### 5.79.1 Member Function/Subroutine Documentation

5.79.1.1 subroutine `messy_main_rnd::rnd_jump::rnd_jump_2` ( `INTEGER`, intent(out) *status*, `INTEGER`, intent(in) *id*, `INTEGER`, intent(in) *n*, `INTEGER`, intent(in) *p*, `INTEGER`, dimension(:), intent(out), optional *get* ) [private]

5.79.1.2 subroutine `messy_main_rnd::rnd_jump::rnd_jump_n` ( `INTEGER`, intent(out) *status*, `INTEGER`, intent(in) *id*, `INTEGER`, intent(in) *n*, `INTEGER`, dimension(:), intent(out), optional *get* ) [private]

The documentation for this interface was generated from the following file:

- [/home/sander/e2/messy\\_d2.50s\\_rs/messy/mbm/caaba/messy\\_main\\_rnd.f90](#)

## 5.80 messy\_main\_rnd\_mtw\_ja::set\_coef Interface Reference

### Private Member Functions

- subroutine [gf2x\\_set\\_coef](#) (a, i)

### 5.80.1 Member Function/Subroutine Documentation

5.80.1.1 subroutine `messy_main_rnd_mtw_ja::set_coef::gf2x_set_coef` ( `type(gf2x_obj)`, intent(inout) *a*, `integer(INT32)`, intent(in) *i* ) [private]

The documentation for this interface was generated from the following file:

- [/home/sander/e2/messy\\_d2.50s\\_rs/messy/mbm/caaba/messy\\_main\\_rnd\\_mtw\\_ja.f90](#)

## 5.81 messy\_main\_rnd\_mtw\_ja::set\_prime Interface Reference

### Private Member Functions

- subroutine [gf2x\\_set\\_prime](#) (mp, m)

### 5.81.1 Member Function/Subroutine Documentation

5.81.1.1 subroutine messy\_main\_rnd\_mtw\_ja::set\_prime::gf2x\_set\_prime  
( type(gf2x\_prime\_obj), intent(inout) *mp*, type(gf2x\_obj), intent(in) *m* )  
[private]

The documentation for this interface was generated from the following file:

- [/home/sander/e2/messy\\_d2.50s\\_rs/messy/mbm/caaba/messy\\_main\\_rnd\\_mtw\\_ja.f90](#)

## 5.82 messy\_main\_rnd\_mtw\_ja::shift Interface Reference

### Private Member Functions

- subroutine [gf2x\\_shift](#) (c, a, i)

### 5.82.1 Member Function/Subroutine Documentation

5.82.1.1 subroutine messy\_main\_rnd\_mtw\_ja::shift::gf2x\_shift ( type(gf2x\_obj),  
intent(inout) *c*, type(gf2x\_obj), intent(in) *a*, integer(INT32), intent(in) *i* )  
[private]

The documentation for this interface was generated from the following file:

- [/home/sander/e2/messy\\_d2.50s\\_rs/messy/mbm/caaba/messy\\_main\\_rnd\\_mtw\\_ja.f90](#)

## 5.83 messy\_main\_rnd\_mtw\_ja::square Interface Reference

### Private Member Functions

- subroutine [gf2x\\_square](#) (c, a)

### 5.83.1 Member Function/Subroutine Documentation

5.83.1.1 subroutine messy\_main\_rnd\_mtw\_ja::square::gf2x\_square (  
type(gf2x\_obj), intent(inout) *c*, type(gf2x\_obj), intent(in) *a* ) [private]

The documentation for this interface was generated from the following file:

- [/home/sander/e2/messy\\_d2.50s\\_rs/messy/mbm/caaba/messy\\_main\\_rnd\\_mtw\\_ja.f90](#)

## 5.84 messy\_main\_tools::str Interface Reference

### Private Member Functions

- CHARACTER(LEN=5) function [str\\_logical](#) (zlogical, fmt)
- CHARACTER(LEN=STRLEN\_LONG) function [str\\_integer](#) (zinteger, fmt)
- CHARACTER(LEN=STRLEN\_LONG) function [str\\_real\\_sp](#) (zreal\_sp, fmt)
- CHARACTER(LEN=STRLEN\_LONG) function [str\\_real\\_dp](#) (zreal\_dp, fmt)

### 5.84.1 Member Function/Subroutine Documentation

5.84.1.1 CHARACTER(LEN=STRLEN\_LONG) function messy\_main\_tools::str::str\_integer ( INTEGER, intent(in) *zinteger*, CHARACTER(LEN=\*), intent(in), optional *fmt* )  
[private]

5.84.1.2 CHARACTER(LEN=5) function messy\_main\_tools::str::str\_logical ( LOGICAL, intent(in) *zlogical*, CHARACTER(LEN=\*), intent(in), optional *fmt* ) [private]

5.84.1.3 CHARACTER(LEN=STRLEN\_LONG) function messy\_main\_tools::str::str\_real\_dp ( REAL(dp), intent(in) *zreal\_dp*, CHARACTER(LEN=\*), intent(in), optional *fmt* )  
[private]

5.84.1.4 CHARACTER(LEN=STRLEN\_LONG) function messy\_main\_tools::str::str\_real\_sp ( REAL(sp), intent(in) *zreal\_sp*, CHARACTER(LEN=\*), intent(in), optional *fmt* )  
[private]

The documentation for this interface was generated from the following file:

- /home/sander/e2/messy\_d2.50s\_rs/messy/mbm/caaba/[messy\\_main\\_tools.f90](#)

## 5.85 messy\_main\_tools::str2num Interface Reference

### Private Member Functions

- subroutine [str2num\\_real\\_dp](#) (str, out, err)
- subroutine [str2num\\_real\\_sp](#) (str, out, err)
- subroutine [str2num\\_integer](#) (str, out, err)

### 5.85.1 Member Function/Subroutine Documentation

5.85.1.1 subroutine messy\_main\_tools::str2num::str2num\_integer ( CHARACTER(LEN=\*), intent(in) *str*, INTEGER, intent(out) *out*, INTEGER, intent(out), optional *err* ) [private]



5.85.1.2 subroutine messy\_main\_tools::str2num::str2num\_real\_dp (  
CHARACTER(LEN=\*), intent(in) *str*, REAL(dp), intent(out) *out*, INTEGER, intent(out),  
optional *err* ) [private]

5.85.1.3 subroutine messy\_main\_tools::str2num::str2num\_real\_sp (  
CHARACTER(LEN=\*), intent(in) *str*, REAL(sp), intent(out) *out*, INTEGER, intent(out),  
optional *err* ) [private]

The documentation for this interface was generated from the following file:

- [/home/sander/e2/messy\\_d2.50s\\_rs/messy/mbm/caaba/messy\\_main\\_tools.f90](#)

## 5.86 messy\_main\_tools::t\_reset\_par Type Reference

### Private Attributes

- LOGICAL *l* = .FALSE.
- REAL(dp) *v* = 0.0\_dp

### 5.86.1 Member Data Documentation

5.86.1.1 LOGICAL messy\_main\_tools::t\_reset\_par::*l* = .FALSE. [private]

5.86.1.2 REAL(dp) messy\_main\_tools::t\_reset\_par::*v* = 0.0\_dp [private]

The documentation for this type was generated from the following file:

- [/home/sander/e2/messy\\_d2.50s\\_rs/messy/mbm/caaba/messy\\_main\\_tools.f90](#)

## 5.87 messy\_main\_timer::time\_days Type Reference

### Public Attributes

- LOGICAL *init* = .FALSE.
- INTEGER *day* = 0
- INTEGER *second* = 0

### 5.87.1 Member Data Documentation

5.87.1.1 INTEGER messy\_main\_timer::time\_days::*day* = 0

5.87.1.2 LOGICAL messy\_main\_timer::time\_days::*init* = .FALSE.

### 5.87.1.3 INTEGER messy\_main\_timer::time\_days::second = 0

The documentation for this type was generated from the following file:

- [/home/sander/e2/messy\\_d2.50s\\_rs/messy/mbm/caaba/messy\\_main\\_timer.f90](#)

## 5.88 messy\_main\_timer::timer\_get\_date Interface Reference

### Private Member Functions

- subroutine [timer\\_get\\_date\\_str](#) (status, strflag, yr, mo, dy, hr, mi, se)
- subroutine [timer\\_get\\_date\\_myd](#) (status, my\_date, yr, mo, dy, hr, mi, se)

### 5.88.1 Member Function/Subroutine Documentation

5.88.1.1 subroutine messy\_main\_timer::timer\_get\_date::timer\_get\_date\_myd ( INTEGER, intent(out) *status*, TYPE(time\_days), intent(in) *my\_date*, INTEGER, intent(out) *yr*, INTEGER, intent(out) *mo*, INTEGER, intent(out) *dy*, INTEGER, intent(out) *hr*, INTEGER, intent(out) *mi*, INTEGER, intent(out) *se* ) [private]

5.88.1.2 subroutine messy\_main\_timer::timer\_get\_date::timer\_get\_date\_str ( INTEGER, intent(out) *status*, CHARACTER(LEN=\*), intent(in) *strflag*, INTEGER, intent(out) *yr*, INTEGER, intent(out) *mo*, INTEGER, intent(out) *dy*, INTEGER, intent(out) *hr*, INTEGER, intent(out) *mi*, INTEGER, intent(out) *se* ) [private]

The documentation for this interface was generated from the following file:

- [/home/sander/e2/messy\\_d2.50s\\_rs/messy/mbm/caaba/messy\\_main\\_timer.f90](#)

## 5.89 messy\_main\_timer::timer\_set\_date Interface Reference

### Private Member Functions

- subroutine [timer\\_set\\_date\\_str](#) (status, strflag, yr, mo, dy, hr, mi, se)
- subroutine [timer\\_set\\_date\\_myd](#) (status, my\_date, yr, mo, dy, hr, mi, se)
- subroutine [timer\\_set\\_date\\_str\\_ds](#) (status, strflag, day, second)
- subroutine [timer\\_set\\_date\\_myd\\_ds](#) (status, my\_date, day, second)

### 5.89.1 Member Function/Subroutine Documentation

5.89.1.1 subroutine messy\_main\_timer::timer\_set\_date::timer\_set\_date\_myd ( INTEGER, intent(out) *status*, TYPE(time\_days), intent(out) *my\_date*, INTEGER, intent(in) *yr*, INTEGER, intent(in) *mo*, INTEGER, intent(in) *dy*, INTEGER, intent(in) *hr*, INTEGER, intent(in) *mi*, INTEGER, intent(in) *se* ) [private]

- 5.89.1.2 subroutine messy\_main\_timer::timer\_set\_date::timer\_set\_date\_myd\_ds (  
INTEGER, intent(out) *status*, TYPE(time\_days), intent(out) *my\_date*, INTEGER,  
intent(in) *day*, INTEGER, intent(in) *second* ) [private]
- 5.89.1.3 subroutine messy\_main\_timer::timer\_set\_date::timer\_set\_date\_str  
( INTEGER, intent(out) *status*, CHARACTER(LEN=\*), intent(in) *strflag*, INTEGER,  
intent(in) *yr*, INTEGER, intent(in) *mo*, INTEGER, intent(in) *dy*, INTEGER, intent(in) *hr*,  
INTEGER, intent(in) *mi*, INTEGER, intent(in) *se* ) [private]
- 5.89.1.4 subroutine messy\_main\_timer::timer\_set\_date::timer\_set\_date\_str\_ds  
( INTEGER, intent(out) *status*, CHARACTER(LEN=\*), intent(in) *strflag*, INTEGER,  
intent(in) *day*, INTEGER, intent(in) *second* ) [private]

The documentation for this interface was generated from the following file:

- [/home/sander/e2/messy\\_d2.50s\\_rs/messy/mbm/caaba/messy\\_main\\_timer.f90](#)



## Chapter 6

# File Documentation

### 6.1 /home/sander/e2/messy\_d2.50s\_rs/messy/mbm/caaba/caaba.f90 File Reference

#### Data Types

- module [caaba\\_module](#)  
*CAABA = Chemistry As A Boxmodel Application.*

#### Functions/Subroutines

- subroutine [dilute](#)
- subroutine [dilute\\_once](#)
- program [caaba](#)

#### 6.1.1 Function/Subroutine Documentation

6.1.1.1 program [caaba](#) ( )

6.1.1.2 subroutine [caaba\\_physc::dilute](#) ( )

6.1.1.3 subroutine [caaba\\_physc::dilute\\_once](#) ( )

### 6.2 /home/sander/e2/messy\_d2.50s\_rs/messy/mbm/caaba/caaba.nml File Reference

### 6.3 /home/sander/e2/messy\_d2.50s\_rs/messy/mbm/caaba/caaba\_- io.f90 File Reference

### Data Types

- module [caaba\\_io](#)

**6.4** [/home/sander/e2/messy\\_d2.50s\\_rs/messy/mbm/caaba/caaba\\_io\\_ascii.inc](#) File Reference

**6.5** [/home/sander/e2/messy\\_d2.50s\\_rs/messy/mbm/caaba/caaba\\_io\\_netcdf.inc](#) File Reference

**6.6** [/home/sander/e2/messy\\_d2.50s\\_rs/messy/mbm/caaba/caaba\\_mem.f90](#) File Reference

### Data Types

- module [caaba\\_mem](#)

**6.7** [/home/sander/e2/messy\\_d2.50s\\_rs/messy/mbm/caaba/e4chem.nml](#) File Reference

**6.8** [/home/sander/e2/messy\\_d2.50s\\_rs/messy/mbm/caaba/jval.nml](#) File Reference

**6.9** [/home/sander/e2/messy\\_d2.50s\\_rs/messy/mbm/caaba/mecca.nml](#) File Reference

**6.10** [/home/sander/e2/messy\\_d2.50s\\_rs/messy/mbm/caaba/messy\\_cm\\_n\\_gasaq.f90](#) File Reference

### Data Types

- module [messy\\_cm\\_n\\_gasaq](#)
- type [messy\\_cm\\_n\\_gasaq::GASQA\\_TYPE](#)

### Functions/Subroutines

- subroutine [add\\_species](#) (name, M)

## 6.11 /home/sander/e2/messy\_d2.50s\_rs/messy/mbm/caaba/messy\_cmn\_photol\_mem.f90 File

### Reference

217

- subroutine [add\\_henry](#) (name, Henry\_T0, Henry\_Tdep)
- subroutine [add\\_alpha](#) (name, alpha\_T0, alpha\_Tdep)
- subroutine [add\\_dryreac](#) (name, dryreac, pss)

### 6.10.1 Function/Subroutine Documentation

6.10.1.1 subroutine [add\\_all\\_alpha::add\\_alpha](#) ( CHARACTER(LEN=\*) , intent(in) *name*, REAL(DP), intent(in) *alpha\_T0*, REAL(DP), intent(in) *alpha\_Tdep* ) [private]

6.10.1.2 subroutine [add\\_all\\_dryreac::add\\_dryreac](#) ( CHARACTER(LEN=\*) , intent(in) *name*, REAL(DP), intent(in) *dryreac*, REAL(DP), intent(in) *pss* )

6.10.1.3 subroutine [add\\_all\\_henry::add\\_henry](#) ( CHARACTER(LEN=\*) , intent(in) *name*, REAL(DP), intent(in) *Henry\_T0*, REAL(DP), intent(in) *Henry\_Tdep* )

6.10.1.4 subroutine [def\\_all\\_species::add\\_species](#) ( CHARACTER(LEN=\*) , intent(in) *name*, REAL(DP), intent(in) *M* ) [private]

## 6.11 /home/sander/e2/messy\_d2.50s\_rs/messy/mbm/caaba/messy\_cmn\_photol\_mem.f90 File Reference

### Data Types

- module [messy\\_cmn\\_photol\\_mem](#)

## 6.12 /home/sander/e2/messy\_d2.50s\_rs/messy/mbm/caaba/messy\_e4chem.f90 File Reference

### Data Types

- module [messy\\_e4chem](#)

### Functions/Subroutines

- REAL(dp) function [ZFUNCRATNONO2](#) (ZDNO2, ZCN13, ZMOLECO, ZCN8, ZMOLECO3, ZCN9, ZMOLECCLO, ZCN10, ZMOLECHO2, ZCN11, ZMOLECC-H3O2)
- REAL(dp) function [ZFUNCRATNNO](#) (ZDNO, ZCN1, ZMOLECO2, ZSCNNO2, ZMOLECNO2, ZSCN3, ZMOLECOH, ZSCN4, ZMOLECHO2, ZSCN2, ZMOLEC-NO)
- REAL(dp) function [ZFUNCPRDH2OLONG](#) (ZCN19, ZMOLECHNO3, ZCC2, ZMOLECHCL, ZCC14, ZMOLECCH3CL, ZCC15, ZMOLECCH3CCL3, ZCH6, ZMOLECH2, ZCH15, ZMOLECH2O2, ZCH19, ZMOLECCH4)

- REAL(dp) function [ZFUNCPROD H2 OSHORT](#) (ZCN6, ZMOLECHNO4, ZCC11, ZMOLECCLOH, ZSCH16, ZMOLECCH2O, ZSCH20, ZSCH21, ZMOLECCH3O2H)
- REAL(dp) function [ZFUNCPROD H2 OHOX](#) (ZSCH18, ZMOLECH, ZMOLECHO2, ZCH1, ZMOLECOH)
- REAL(dp) function [ZFUNC3BODY](#) (ZK1, ZK2)

### 6.12.1 Function/Subroutine Documentation

- 6.12.1.1 REAL(dp) function **CHEMICS::ZFUNC3BODY** ( REAL(dp), intent(in) ZK1, REAL(dp), intent(in) ZK2 ) [private]
- 6.12.1.2 REAL(dp) function **CHEMICS::ZFUNCPROD H2 OHOX** ( REAL(dp), intent(in) ZSCH18, REAL(dp), intent(in) ZMOLECH, REAL(dp), intent(in) ZMOLECHO2, REAL(dp), intent(in) ZCH1, REAL(dp), intent(in) ZMOLECOH ) [private]
- 6.12.1.3 REAL(dp) function **CHEMICS::ZFUNCPROD H2 OLONG** ( REAL(dp), intent(in) ZCN19, REAL(dp), intent(in) ZMOLECHNO3, REAL(dp), intent(in) ZCC2, REAL(dp), intent(in) ZMOLECHCL, REAL(dp), intent(in) ZCC14, REAL(dp), intent(in) ZMOLECCH3CL, REAL(dp), intent(in) ZCC15, REAL(dp), intent(in) ZMOLECCH3CCL3, REAL(dp), intent(in) ZCH6, REAL(dp), intent(in) ZMOLECH2, REAL(dp), intent(in) ZCH15, REAL(dp), intent(in) ZMOLECH2O2, REAL(dp), intent(in) ZCH19, REAL(dp), intent(in) ZMOLECCH4 ) [private]
- 6.12.1.4 REAL(dp) function **CHEMICS::ZFUNCPROD H2 OSHORT** ( REAL(dp), intent(in) ZCN6, REAL(dp), intent(in) ZMOLECHNO4, REAL(dp), intent(in) ZCC11, REAL(dp), intent(in) ZMOLECCLOH, REAL(dp), intent(in) ZSCH16, REAL(dp), intent(in) ZMOLECCH2O, REAL(dp), intent(in) ZSCH20, REAL(dp), intent(in) ZSCH21, REAL(dp), intent(in) ZMOLECCH3O2H ) [private]
- 6.12.1.5 REAL(dp) function **CHEMICS::ZFUNCRATNNO** ( REAL(dp), intent(in) ZDNO, REAL(dp), intent(in) ZCN1, REAL(dp), intent(in) ZMOLECO2, REAL(dp), intent(in) ZSCNNO2, REAL(dp), intent(in) ZMOLECO2, REAL(dp), intent(in) ZSCN3, REAL(dp), intent(in) ZMOLECOH, REAL(dp), intent(in) ZSCN4, REAL(dp), intent(in) ZMOLECHO2, REAL(dp), intent(in) ZSCN2, REAL(dp), intent(in) ZMOLECO ) [private]
- 6.12.1.6 REAL(dp) function **CHEMICS::ZFUNCRATNONO2** ( REAL(dp), intent(in) ZDNO2, REAL(dp), intent(in) ZCN13, REAL(dp), intent(in) ZMOLECO, REAL(dp), intent(in) ZCN8, REAL(dp), intent(in) ZMOLECO3, REAL(dp), intent(in) ZCN9, REAL(dp), intent(in) ZMOLECCLO, REAL(dp), intent(in) ZCN10, REAL(dp), intent(in) ZMOLECHO2, REAL(dp), intent(in) ZCN11, REAL(dp), intent(in) ZMOLECCH3O2 )

## 6.13 /home/sander/e2/messy\_d2.50s\_rs/messy/mbm/caaba/messy-e4chem\_box.f90 File Reference



## Data Types

- module [messy\\_e4chem\\_box](#)

## Functions/Subroutines

- subroutine [x0\\_strato](#)
- subroutine [x0\\_mtchem](#)
- subroutine [check\\_range](#) (infostring, conc)

### 6.13.1 Function/Subroutine Documentation

6.13.1.1 subroutine [e4chem\\_physc::check\\_range](#) ( CHARACTER(LEN=\*), intent(in) *infostring*, REAL(DP), dimension(:), intent(in) *conc* )

6.13.1.2 subroutine [x0::x0\\_mtchem](#) ( ) [private]

6.13.1.3 subroutine [x0::x0\\_strato](#) ( )

## 6.14 /home/sander/e2/messy\_d2.50s\_rs/messy/mbm/caaba/messy\_jval.f90 File Reference

## Data Types

- module [messy\\_jval](#)

## Functions/Subroutines

- subroutine [column\\_cal](#)
- subroutine [flux\\_cal](#)
- subroutine [slingo](#)
- subroutine [aero\\_2d](#)
- subroutine [pifm](#)
- subroutine [pifmini](#)

### 6.14.1 Function/Subroutine Documentation

6.14.1.1 subroutine [jvalues::aero\\_2d](#) ( ) [private]

6.14.1.2 subroutine [jvalues::column\\_cal](#) ( )

#### 6.14.1.3 subroutine jvalues::flux\_cal ( ) [private]

Here is the call graph for this function:

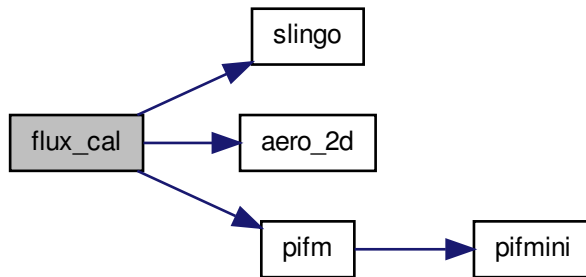

#### 6.14.1.4 subroutine jvalues::pifm ( ) [private]

Here is the call graph for this function:

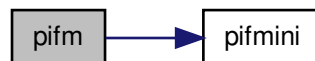

#### 6.14.1.5 subroutine jvalues::pifmini ( ) [private]

#### 6.14.1.6 subroutine jvalues::slingo ( ) [private]

### 6.15 /home/sander/e2/messy\_d2.50s\_rs/messy/mbm/caaba/messy-jval\_box.f90 File Reference

## Data Types

- module [messy\\_jval\\_box](#)

## Functions/Subroutines

- subroutine [allocate\\_arrays](#)
- subroutine [photo\\_mbl](#)
- subroutine [photo\\_strato](#)

### 6.15.1 Function/Subroutine Documentation

6.15.1.1 subroutine `jval_init::allocate_arrays ( )`

6.15.1.2 subroutine `jval_init::photo_mbl ( )` [private]

Here is the call graph for this function:

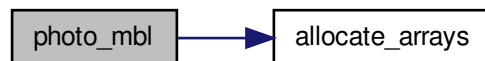

6.15.1.3 subroutine `jval_init::photo_strato ( )` [private]

Here is the call graph for this function:

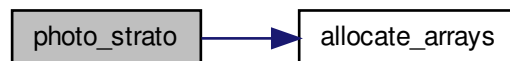

## 6.16 /home/sander/e2/messy\_d2.50s\_rs/messy/mbm/caaba/messy-jval\_jvpp.inc File Reference

### Functions/Subroutines

- subroutine [jval\\_cal](#)
- subroutine [jval\\_cal\\_O2](#)
- subroutine [jval\\_cal\\_O3P](#)
- subroutine [jval\\_cal\\_O1D](#)
- subroutine [jval\\_cal\\_H2O2](#)
- subroutine [jval\\_cal\\_NO2](#)
- subroutine [jval\\_cal\\_NO2O](#)
- subroutine [jval\\_cal\\_NOO2](#)
- subroutine [jval\\_cal\\_N2O5](#)
- subroutine [jval\\_cal\\_HNO3](#)
- subroutine [jval\\_cal\\_HNO4](#)
- subroutine [jval\\_cal\\_PAN](#)
- subroutine [jval\\_cal\\_HONO](#)
- subroutine [jval\\_cal\\_CH3OOH](#)
- subroutine [jval\\_cal\\_COH2](#)
- subroutine [jval\\_cal\\_CHOH](#)
- subroutine [jval\\_cal\\_CH3CO3H](#)
- subroutine [jval\\_cal\\_CH3CHO](#)
- subroutine [jval\\_cal\\_CH3COCH3](#)
- subroutine [jval\\_cal\\_MGLYOX](#)
- subroutine [jval\\_cal\\_HOCl](#)
- subroutine [jval\\_cal\\_OCIO](#)
- subroutine [jval\\_cal\\_Cl2O2](#)
- subroutine [jval\\_cal\\_ClNO3](#)
- subroutine [jval\\_cal\\_ClNO2](#)
- subroutine [jval\\_cal\\_Cl2](#)
- subroutine [jval\\_cal\\_BrO](#)
- subroutine [jval\\_cal\\_HOBr](#)
- subroutine [jval\\_cal\\_BrCl](#)
- subroutine [jval\\_cal\\_BrNO3](#)
- subroutine [jval\\_cal\\_BrNO2](#)
- subroutine [jval\\_cal\\_Br2](#)
- subroutine [jval\\_cal\\_CCl4](#)
- subroutine [jval\\_cal\\_CH3Cl](#)
- subroutine [jval\\_cal\\_CH3CCl3](#)
- subroutine [jval\\_cal\\_CFCI3](#)
- subroutine [jval\\_cal\\_CF2Cl2](#)
- subroutine [jval\\_cal\\_CH3Br](#)
- subroutine [jval\\_cal\\_CF2ClBr](#)
- subroutine [jval\\_cal\\_CF3Br](#)
- subroutine [jval\\_cal\\_CH3I](#)

- subroutine [jval\\_cal\\_C3H7I](#)
- subroutine [jval\\_cal\\_CH2CII](#)
- subroutine [jval\\_cal\\_CH2I2](#)
- subroutine [jval\\_cal\\_IO](#)
- subroutine [jval\\_cal\\_HOI](#)
- subroutine [jval\\_cal\\_I2](#)
- subroutine [jval\\_cal\\_ICI](#)
- subroutine [jval\\_cal\\_IBr](#)
- subroutine [jval\\_cal\\_INO2](#)
- subroutine [jval\\_cal\\_INO3](#)
- subroutine [jval\\_cal\\_SO2](#)
- subroutine [jval\\_cal\\_SO3](#)
- subroutine [jval\\_cal\\_OCS](#)
- subroutine [jval\\_cal\\_H2O](#)
- subroutine [jval\\_cal\\_N2O](#)
- subroutine [jval\\_cal\\_NO](#)
- subroutine [jval\\_cal\\_CO2](#)
- subroutine [jval\\_cal\\_HCl](#)
- subroutine [jval\\_cal\\_CHCl2Br](#)
- subroutine [jval\\_cal\\_CHClBr2](#)
- subroutine [jval\\_cal\\_CH2ClBr](#)
- subroutine [jval\\_cal\\_CH2Br2](#)
- subroutine [jval\\_cal\\_CHBr3](#)
- subroutine [jval\\_cal\\_SF6](#)
- subroutine [jval\\_cal\\_ClONO2](#)
- subroutine [jval\\_cal\\_MACR](#)
- subroutine [jval\\_cal\\_MVK](#)
- subroutine [jval\\_cal\\_GLYOX](#)
- subroutine [jval\\_cal\\_HOCH2CHO](#)
- subroutine [jval\\_cal\\_CH4](#)
- subroutine [jval\\_cal\\_H2SO4](#)
- subroutine [jval\\_cal\\_CH3NO3](#)
- subroutine [jval\\_cal\\_CH3O2NO2](#)
- subroutine [jval\\_cal\\_CH3ONO](#)
- subroutine [jval\\_cal\\_CH3O2](#)
- subroutine [jval\\_cal\\_HCOOH](#)

### 6.16.1 Function/Subroutine Documentation

6.16.1.1 subroutine [jval\\_cal](#) ( )

6.16.1.2 subroutine [jval\\_cal\\_Br2](#) ( )

6.16.1.3 subroutine [jval\\_cal\\_BrCl](#) ( )

6.16.1.4 subroutine jval\_cal\_BrNO2 ( )  
6.16.1.5 subroutine jval\_cal\_BrNO3 ( )  
6.16.1.6 subroutine jval\_cal\_BrO ( )  
6.16.1.7 subroutine jval\_cal\_C3H7I ( )  
6.16.1.8 subroutine jval\_cal\_CCl4 ( )  
6.16.1.9 subroutine jval\_cal\_CF2Cl2 ( )  
6.16.1.10 subroutine jval\_cal\_CF2ClBr ( )  
6.16.1.11 subroutine jval\_cal\_CF3Br ( )  
6.16.1.12 subroutine jval\_cal\_CFCI3 ( )  
6.16.1.13 subroutine jval\_cal\_CH2Br2 ( )  
6.16.1.14 subroutine jval\_cal\_CH2ClBr ( )  
6.16.1.15 subroutine jval\_cal\_CH2ClI ( )  
6.16.1.16 subroutine jval\_cal\_CH2I2 ( )  
6.16.1.17 subroutine jval\_cal\_CH3Br ( )  
6.16.1.18 subroutine jval\_cal\_CH3CCl3 ( )  
6.16.1.19 subroutine jval\_cal\_CH3CHO ( )  
6.16.1.20 subroutine jval\_cal\_CH3Cl ( )  
6.16.1.21 subroutine jval\_cal\_CH3CO3H ( )  
6.16.1.22 subroutine jval\_cal\_CH3COCH3 ( )  
6.16.1.23 subroutine jval\_cal\_CH3I ( )  
6.16.1.24 subroutine jval\_cal\_CH3NO3 ( )  
6.16.1.25 subroutine jval\_cal\_CH3O2 ( )  
6.16.1.26 subroutine jval\_cal\_CH3O2NO2 ( )  
6.16.1.27 subroutine jval\_cal\_CH3ONO ( )

6.16.1.28 subroutine jval\_cal\_CH3OOH ( )  
6.16.1.29 subroutine jval\_cal\_CH4 ( )  
6.16.1.30 subroutine jval\_cal\_CHBr3 ( )  
6.16.1.31 subroutine jval\_cal\_CHCl2Br ( )  
6.16.1.32 subroutine jval\_cal\_CHClBr2 ( )  
6.16.1.33 subroutine jval\_cal\_CHOH ( )  
6.16.1.34 subroutine jval\_cal\_Cl2 ( )  
6.16.1.35 subroutine jval\_cal\_Cl2O2 ( )  
6.16.1.36 subroutine jval\_cal\_CINO2 ( )  
6.16.1.37 subroutine jval\_cal\_CINO3 ( )  
6.16.1.38 subroutine jval\_cal\_ClONO2 ( )  
6.16.1.39 subroutine jval\_cal\_CO2 ( )  
6.16.1.40 subroutine jval\_cal\_COH2 ( )  
6.16.1.41 subroutine jval\_cal\_GLYOX ( )  
6.16.1.42 subroutine jval\_cal\_H2O ( )  
6.16.1.43 subroutine jval\_cal\_H2O2 ( )  
6.16.1.44 subroutine jval\_cal\_H2SO4 ( )  
6.16.1.45 subroutine jval\_cal\_HCl ( )  
6.16.1.46 subroutine jval\_cal\_HCOOH ( )  
6.16.1.47 subroutine jval\_cal\_HNO3 ( )  
6.16.1.48 subroutine jval\_cal\_HNO4 ( )  
6.16.1.49 subroutine jval\_cal\_HOBr ( )  
6.16.1.50 subroutine jval\_cal\_HOCH2CHO ( )  
6.16.1.51 subroutine jval\_cal\_HOCl ( )

6.16.1.52 subroutine jval\_cal\_HOI ( )  
6.16.1.53 subroutine jval\_cal\_HONO ( )  
6.16.1.54 subroutine jval\_cal\_I2 ( )  
6.16.1.55 subroutine jval\_cal\_IBr ( )  
6.16.1.56 subroutine jval\_cal\_ICI ( )  
6.16.1.57 subroutine jval\_cal\_INO2 ( )  
6.16.1.58 subroutine jval\_cal\_INO3 ( )  
6.16.1.59 subroutine jval\_cal\_IO ( )  
6.16.1.60 subroutine jval\_cal\_MACR ( )  
6.16.1.61 subroutine jval\_cal\_MGLYOX ( )  
6.16.1.62 subroutine jval\_cal\_MVK ( )  
6.16.1.63 subroutine jval\_cal\_N2O ( )  
6.16.1.64 subroutine jval\_cal\_N2O5 ( )  
6.16.1.65 subroutine jval\_cal\_NO ( )  
6.16.1.66 subroutine jval\_cal\_NO2 ( )  
6.16.1.67 subroutine jval\_cal\_NO2O ( )  
6.16.1.68 subroutine jval\_cal\_NOO2 ( )  
6.16.1.69 subroutine jval\_cal\_O1D ( )  
6.16.1.70 subroutine jval\_cal\_O2 ( )  
6.16.1.71 subroutine jval\_cal\_O3P ( )  
6.16.1.72 subroutine jval\_cal\_OCIO ( )  
6.16.1.73 subroutine jval\_cal\_OCS ( )  
6.16.1.74 subroutine jval\_cal\_PAN ( )  
6.16.1.75 subroutine jval\_cal\_SF6 ( )



## 6.17

/home/sander/e2/messy\_d2.50s\_rs/messy/mbm/caaba/messy\_main\_blather.f90

### File Reference

227

6.16.1.76 subroutine jval\_cal\_SO2 ( )

6.16.1.77 subroutine jval\_cal\_SO3 ( )

## 6.17 /home/sander/e2/messy\_d2.50s\_rs/messy/mbm/caaba/messy\_main\_blather.f90 File Reference

### Data Types

- module [messy\\_main\\_blather](#)

## 6.18 /home/sander/e2/messy\_d2.50s\_rs/messy/mbm/caaba/messy\_main\_constants\_mem.f90 File Reference

### Data Types

- module [messy\\_main\\_constants\\_mem](#)

## 6.19 /home/sander/e2/messy\_d2.50s\_rs/messy/mbm/caaba/messy\_main\_control\_cb.f90 File Reference

### Data Types

- module [messy\\_main\\_control\\_cb](#)

## 6.20 /home/sander/e2/messy\_d2.50s\_rs/messy/mbm/caaba/messy\_main\_rnd.f90 File Reference

### Data Types

- module [messy\\_main\\_rnd](#)
- interface [messy\\_main\\_rnd::rnd\\_jump](#)

## 6.21 /home/sander/e2/messy\_d2.50s\_rs/messy/mbm/caaba/messy\_main\_rnd\_lux.f90 File Reference

### Data Types

- module [messy\\_main\\_rnd\\_lux](#)

## 6.22 `/home/sander/e2/messy_d2.50s_rs/messy/mbm/caaba/messy-main_rnd_mtw.f90` File Reference

### Data Types

- module [messy\\_main\\_rnd\\_mtw](#)

## 6.23 `/home/sander/e2/messy_d2.50s_rs/messy/mbm/caaba/messy-main_rnd_mtw_ja.f90` File Reference

### Data Types

- module [messy\\_main\\_rnd\\_mtw\\_ja](#)
- type [messy\\_main\\_rnd\\_mtw\\_ja::gf2x\\_obj](#)
- type [messy\\_main\\_rnd\\_mtw\\_ja::gf2x\\_prime\\_obj](#)
- interface [messy\\_main\\_rnd\\_mtw\\_ja::new](#)
- interface [messy\\_main\\_rnd\\_mtw\\_ja::delete](#)
- interface [messy\\_main\\_rnd\\_mtw\\_ja::print\\_bit](#)
- interface [messy\\_main\\_rnd\\_mtw\\_ja::print\\_hex](#)
- interface [messy\\_main\\_rnd\\_mtw\\_ja::set\\_coef](#)
- interface [messy\\_main\\_rnd\\_mtw\\_ja::set\\_prime](#)
- interface [messy\\_main\\_rnd\\_mtw\\_ja::assign](#)
- interface [messy\\_main\\_rnd\\_mtw\\_ja::add](#)
- interface [messy\\_main\\_rnd\\_mtw\\_ja::add\\_assign](#)
- interface [messy\\_main\\_rnd\\_mtw\\_ja::mult](#)
- interface [messy\\_main\\_rnd\\_mtw\\_ja::mult\\_assign](#)
- interface [messy\\_main\\_rnd\\_mtw\\_ja::pow](#)
- interface [messy\\_main\\_rnd\\_mtw\\_ja::square](#)
- interface [messy\\_main\\_rnd\\_mtw\\_ja::mult\\_by\\_x](#)
- interface [messy\\_main\\_rnd\\_mtw\\_ja::mod\\_by\\_x](#)
- interface [messy\\_main\\_rnd\\_mtw\\_ja::div\\_by\\_x](#)
- interface [messy\\_main\\_rnd\\_mtw\\_ja::div](#)
- interface [messy\\_main\\_rnd\\_mtw\\_ja::rem](#)
- interface [messy\\_main\\_rnd\\_mtw\\_ja::divrem](#)
- interface [messy\\_main\\_rnd\\_mtw\\_ja::shift](#)

## 6.24 `/home/sander/e2/messy_d2.50s_rs/messy/mbm/caaba/messy-main_timer.f90` File Reference

### Data Types

- module [messy\\_main\\_timer](#)

6.25

/home/sander/e2/messy\_d2.50s\_rs/messy/mbm/caaba/messy\_main\_tools.f90

File Reference

229

- type [messy\\_main\\_timer::time\\_days](#)
- interface [messy\\_main\\_timer::timer\\_set\\_date](#)
- interface [messy\\_main\\_timer::timer\\_get\\_date](#)

## 6.25 /home/sander/e2/messy\_d2.50s\_rs/messy/mbm/caaba/messy-main\_tools.f90 File Reference

### Data Types

- module [messy\\_main\\_tools](#)
- type [messy\\_main\\_tools::PTR\\_1D\\_ARRAY\\_INT](#)
- type [messy\\_main\\_tools::PTR\\_0D\\_ARRAY](#)
- type [messy\\_main\\_tools::PTR\\_1D\\_ARRAY](#)
- type [messy\\_main\\_tools::PTR\\_2D\\_ARRAY](#)
- type [messy\\_main\\_tools::PTR\\_3D\\_ARRAY](#)
- type [messy\\_main\\_tools::PTR\\_4D\\_ARRAY](#)
- type [messy\\_main\\_tools::PTR\\_5D\\_ARRAY](#)
- type [messy\\_main\\_tools::t\\_reset\\_par](#)
- interface [messy\\_main\\_tools::str](#)
- interface [messy\\_main\\_tools::iso2ind](#)
- interface [messy\\_main\\_tools::ind2val](#)
- interface [messy\\_main\\_tools::remap\\_bounds](#)
- interface [messy\\_main\\_tools::str2num](#)

## 6.26 /home/sander/e2/messy\_d2.50s\_rs/messy/mbm/caaba/messy-main\_tools\_kp4\_compress.f90 File Reference

### Data Types

- module [messy\\_main\\_tools\\_kp4\\_compress](#)
- interface [messy\\_main\\_tools\\_kp4\\_compress::kco\\_initialize](#)
- interface [messy\\_main\\_tools\\_kp4\\_compress::kco\\_compress](#)
- interface [messy\\_main\\_tools\\_kp4\\_compress::kco\\_finalize](#)

## 6.27 /home/sander/e2/messy\_d2.50s\_rs/messy/mbm/caaba/messy-mecca.f90 File Reference

### Data Types

- module [messy\\_mecca](#)

## 6.28 /home/sander/e2/messy\_d2.50s\_rs/messy/mbm/caaba/messy-\_mecca\_aero.f90 File Reference

### Data Types

- module [messy\\_mecca\\_aero](#)

### Functions/Subroutines

- subroutine [mecca\\_aero\\_K\\_tot](#) (K\_tot)

#### 6.28.1 Function/Subroutine Documentation

6.28.1.1 subroutine [mecca\\_aero\\_calc\\_k\\_ex\\_ocean::mecca\\_aero\\_K\\_tot](#) ( REAL(dp), dimension(0:nspec), intent(out) *K\_tot* ) [*private*]

## 6.29 /home/sander/e2/messy\_d2.50s\_rs/messy/mbm/caaba/messy-\_mecca\_box.f90 File Reference

### Data Types

- module [messy\\_mecca\\_box](#)

### Functions/Subroutines

- subroutine [x0\\_simple](#)
- subroutine [x0\\_ff\\_antarctic](#)
- subroutine [x0\\_ff\\_arctic](#)
- subroutine [x0\\_hoover](#)
- subroutine [x0\\_free\\_trop](#)
- subroutine [x0\\_lab](#)
- subroutine [x0\\_mbl](#)
- subroutine [x0\\_mim2](#)
- subroutine [x0\\_oomph](#)
- subroutine [x0\\_isoo](#)
- subroutine [x0\\_strato20](#)
- subroutine [x0\\_strato10](#)
- subroutine [x0\\_mtchem](#)
- subroutine [aerosol\\_exchng](#)
- subroutine [check\\_range](#) (infostring, conc)

## 6.30 /home/sander/e2/messy\_d2.50s\_rs/messy/mbm/caaba/messy\_mecca\_dbl\_box.f90 File Reference

231

### 6.29.1 Function/Subroutine Documentation

---

6.29.1.1 subroutine `mecca_physc::aerosol_exchng` ( )

6.29.1.2 subroutine `mecca_physc::check_range` ( CHARACTER(LEN=\*), intent(in) *infostring*, REAL(DP), dimension(:), intent(in) *conc* )

6.29.1.3 subroutine `x0::x0_ff_antarctic` ( ) [private]

6.29.1.4 subroutine `x0::x0_ff_arctic` ( ) [private]

6.29.1.5 subroutine `x0::x0_free_trop` ( ) [private]

6.29.1.6 subroutine `x0::x0_hoover` ( ) [private]

6.29.1.7 subroutine `x0::x0_isoo` ( ) [private]

6.29.1.8 subroutine `x0::x0_lab` ( ) [private]

6.29.1.9 subroutine `x0::x0_mbl` ( ) [private]

6.29.1.10 subroutine `x0::x0_mim2` ( ) [private]

6.29.1.11 subroutine `x0::x0_mtchem` ( ) [private]

6.29.1.12 subroutine `x0::x0_oomph` ( ) [private]

6.29.1.13 subroutine `x0::x0_simple` ( )

6.29.1.14 subroutine `x0::x0_strato10` ( ) [private]

6.29.1.15 subroutine `x0::x0_strato20` ( ) [private]

## 6.30 /home/sander/e2/messy\_d2.50s\_rs/messy/mbm/caaba/messy\_mecca\_dbl\_box.f90 File Reference

### Data Types

- module [messy\\_mecca\\_dbl\\_box](#)

## 6.31 /home/sander/e2/messy\_d2.50s\_rs/messy/mbm/caaba/messy\_mecca\_dbl\_parameters.inc File Reference

### 6.32 `/home/sander/e2/messy_d2.50s_rs/messy/mbm/caaba/messy-_mecca_khet.f90` File Reference

#### Data Types

- module [messy\\_mecca\\_khet](#)

### 6.33 `/home/sander/e2/messy_d2.50s_rs/messy/mbm/caaba/messy-_mecca_kpp.f90` File Reference

#### Data Types

- module [messy\\_mecca\\_kpp](#)

#### Functions/Subroutines

- subroutine [kpp\\_read\\_nml\\_ctrl](#) (status, iou)
- subroutine [montecarlo\\_check](#)

#### 6.33.1 Function/Subroutine Documentation

6.33.1.1 subroutine `initialize_kpp_ctrl::kpp_read_nml_ctrl` ( `INTEGER`, intent(out) *status*, `INTEGER`, intent(in) *iou* )

6.33.1.2 subroutine `kpp_integrate::montecarlo_check` ( )

### 6.34 `/home/sander/e2/messy_d2.50s_rs/messy/mbm/caaba/messy-_mecca_kpp_function.f90` File Reference

#### Data Types

- module [messy\\_mecca\\_kpp\\_Function](#)

### 6.35 `/home/sander/e2/messy_d2.50s_rs/messy/mbm/caaba/messy-_mecca_kpp_global.f90` File Reference

#### Data Types

- module [messy\\_mecca\\_kpp\\_Global](#)

**6.36** `/home/sander/e2/messy_d2.50s_rs/messy/mbm/caaba/messy_mecca_kpp_initialize.f90` File

Reference

**6.36** `/home/sander/e2/messy_d2.50s_rs/messy/mbm/caaba/messy_mecca_kpp_initialize.f90` File Reference 233

## Data Types

- module [messy\\_mecca\\_kpp\\_Initialize](#)

**6.37** `/home/sander/e2/messy_d2.50s_rs/messy/mbm/caaba/messy_mecca_kpp_integrator.f90` File Reference

## Data Types

- module [messy\\_mecca\\_kpp\\_Integrator](#)

## Functions/Subroutines

- subroutine [ros\\_ErrorMsg](#) (Code, T, H, IERR)
- subroutine [ros\\_Integrator](#) (Y, Tstart, Tend, T, AbsTol, RelTol, REAL(kind=dp) function [ros\\_ErrorNorm](#) (Y, Ynew, Yerr, AbsTol, RelTol, VectorTol)
- subroutine [ros\\_FunTimeDerivative](#) (T, Roundoff, Y, Fcn0, dFdT)
- subroutine [ros\\_PrepareMatrix](#) (H, Direction, gam, Jac0, Ghimj, Pivot, Singular)
- subroutine [ros-Decomp](#) (A, Pivot, ising)
- subroutine [ros-Solve](#) (A, Pivot, b)
- subroutine [Ros2](#)
- subroutine [Ros3](#)
- subroutine [Ros4](#)
- subroutine [Rodas3](#)
- subroutine [Rodas4](#)

### 6.37.1 Function/Subroutine Documentation

6.37.1.1 subroutine `Rosenbrock::Rodas3` ( )

6.37.1.2 subroutine `Rosenbrock::Rodas4` ( )

6.37.1.3 subroutine `Rosenbrock::Ros2` ( )

6.37.1.4 subroutine `Rosenbrock::Ros3` ( )

6.37.1.5 subroutine `Rosenbrock::Ros4` ( )

6.37.1.6 subroutine `Rosenbrock::ros-Decomp` ( REAL(kind=dp), dimension(lu\_nonzero), intent(inout) *A*, INTEGER, dimension(n), intent(out) *Pivot*, INTEGER, intent(out) *ising* )

- 6.37.1.7 subroutine **Rosenbrock::ros\_ErrorMsg** ( **INTEGER**, intent(in) *Code*,  
**REAL**(kind=dp), intent(in) *T*, **REAL**(kind=dp), intent(in) *H*, **INTEGER**, intent(out) *IERR* )
- 6.37.1.8 **REAL**(kind=dp) function **Rosenbrock::ros\_ErrorNorm** ( **REAL**(kind=dp),  
dimension(n), intent(in) *Y*, **REAL**(kind=dp), dimension(n), intent(in) *Ynew*,  
**REAL**(kind=dp), dimension(n), intent(in) *Yerr*, **REAL**(kind=dp), dimension(n), intent(in)  
*AbsTol*, **REAL**(kind=dp), dimension(n), intent(in) *RelTol*, **LOGICAL**, intent(in) *VectorTol* )
- 6.37.1.9 subroutine **Rosenbrock::ros\_FunTimeDerivative** ( **REAL**(kind=dp), intent(in)  
*T*, **REAL**(kind=dp), intent(in) *Roundoff*, **REAL**(kind=dp), dimension(n), intent(in) *Y*,  
**REAL**(kind=dp), dimension(n), intent(in) *Fcn0*, **REAL**(kind=dp), dimension(n), intent(out)  
*dFdT* )
- 6.37.1.10 subroutine **Rosenbrock::ros\_Integrator** ( **REAL**(kind=dp), dimension(n),  
intent(inout) *Y*, **REAL**(kind=dp), intent(in) *Tstart*, **REAL**(kind=dp), intent(in) *Tend*,  
**REAL**(kind=dp), intent(out) *T*, **REAL**(kind=dp), dimension(n), intent(in) *AbsTol*,  
**REAL**(kind=dp), dimension(n), intent(in) *RelTol* )

Here is the call graph for this function:

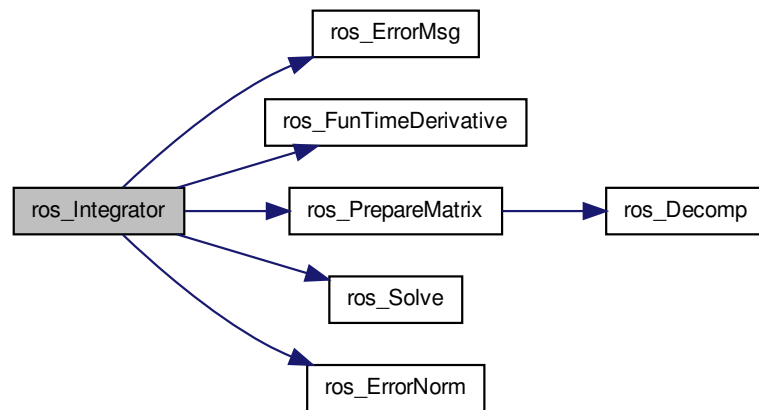



### 6.38 /home/sander/e2/messy\_d2.50s\_rs/messy/mbm/caaba/messy\_mecca\_kpp\_jacobian.f90 File

#### Reference

235

6.37.1.11 subroutine **Rosenbrock::ros\_PrepMatrix** ( *REAL*(kind=dp), intent(inout)  
*H*, *INTEGER*, intent(in) *Direction*, *REAL*(kind=dp), intent(in) *gam*, *REAL*(kind=dp),  
dimension(lu\_nonzero), intent(in) *Jac0*, *REAL*(kind=dp), dimension(lu\_nonzero),  
intent(out) *Ghimj*, *INTEGER*, dimension(n), intent(out) *Pivot*, *LOGICAL*, intent(out)  
*Singular* )

Here is the call graph for this function:

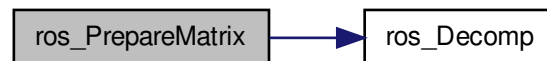

6.37.1.12 subroutine **Rosenbrock::ros\_Solve** ( *REAL*(kind=dp), dimension(lu\_nonzero),  
intent(in) *A*, *INTEGER*, dimension(n), intent(in) *Pivot*, *REAL*(kind=dp), dimension(n),  
intent(inout) *b* )

### 6.38 /home/sander/e2/messy\_d2.50s\_rs/messy/mbm/caaba/messy\_mecca\_kpp\_jacobian.f90 File Reference

#### Data Types

- module [messy\\_mecca\\_kpp\\_Jacobian](#)

### 6.39 /home/sander/e2/messy\_d2.50s\_rs/messy/mbm/caaba/messy\_mecca\_kpp\_jacobiansp.f90 File Reference

#### Data Types

- module [messy\\_mecca\\_kpp\\_JacobianSP](#)

### 6.40 /home/sander/e2/messy\_d2.50s\_rs/messy/mbm/caaba/messy\_mecca\_kpp\_linearalgebra.f90 File Reference

#### Data Types

- module [messy\\_mecca\\_kpp\\_LinearAlgebra](#)

#### 6.41 `/home/sander/e2/messy_d2.50s_rs/messy/mbm/caaba/messy-_mecca_kpp_monitor.f90` File Reference

##### Data Types

- module [messy\\_mecca\\_kpp\\_Monitor](#)

#### 6.42 `/home/sander/e2/messy_d2.50s_rs/messy/mbm/caaba/messy-_mecca_kpp_parameters.f90` File Reference

##### Data Types

- module [messy\\_mecca\\_kpp\\_Parameters](#)

#### 6.43 `/home/sander/e2/messy_d2.50s_rs/messy/mbm/caaba/messy-_mecca_kpp_precision.f90` File Reference

##### Data Types

- module [messy\\_mecca\\_kpp\\_Precision](#)

#### 6.44 `/home/sander/e2/messy_d2.50s_rs/messy/mbm/caaba/messy-_mecca_kpp_rates.f90` File Reference

##### Data Types

- module [messy\\_mecca\\_kpp\\_Rates](#)

#### 6.45 `/home/sander/e2/messy_d2.50s_rs/messy/mbm/caaba/messy-_mecca_kpp_util.f90` File Reference

##### Data Types

- module [messy\\_mecca\\_kpp\\_Util](#)

#### 6.46 `/home/sander/e2/messy_d2.50s_rs/messy/mbm/caaba/messy-_mecca_tag_box.f90` File Reference

- module [messy\\_mecca\\_tag\\_box](#)

## 6.47 /home/sander/e2/messy\_d2.50s\_rs/messy/mbm/caaba/messy\_mecca\_tag\_parameters.inc File Reference

## 6.48 /home/sander/e2/messy\_d2.50s\_rs/messy/mbm/caaba/messy\_radjimt.f90 File Reference

### Data Types

- module [messy\\_radjimt](#)

## 6.49 /home/sander/e2/messy\_d2.50s\_rs/messy/mbm/caaba/messy\_radjimt\_box.f90 File Reference

### Data Types

- module [messy\\_radjimt\\_box](#)

### Functions/Subroutines

- subroutine [allocate\\_arrays](#)
- subroutine [photo\\_mtchem](#)

#### 6.49.1 Function/Subroutine Documentation

##### 6.49.1.1 subroutine `radjimt_init::allocate_arrays` ( )

#### 6.49.1.2 subroutine `radjimt_init::photo_mtchem ( )` [`private`]

Here is the call graph for this function:

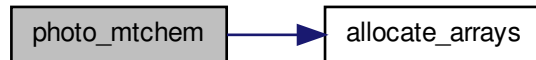

### 6.50 `/home/sander/e2/messy_d2.50s_rs/messy/mbm/caaba/messy-_readj.f90` File Reference

#### Data Types

- module [messy\\_readj](#)

### 6.51 `/home/sander/e2/messy_d2.50s_rs/messy/mbm/caaba/messy-_readj_box.f90` File Reference

#### Data Types

- module [messy\\_readj\\_box](#)

### 6.52 `/home/sander/e2/messy_d2.50s_rs/messy/mbm/caaba/messy-_sappho.f90` File Reference

#### Data Types

- module [messy\\_sappho](#)

#### Functions/Subroutines

- subroutine [photo\\_ff](#)
- subroutine [photo\\_lab](#)
- subroutine [photo\\_mbl](#)

## 6.53

/home/sander/e2/messy\_d2.50s\_rs/messy/mbm/caaba/messy\_sappho\_box.f90

### File Reference

239

#### 6.52.1 Function/Subroutine Documentation

---

6.52.1.1 subroutine [jvalues::photo\\_ff](#)( ) [private]

6.52.1.2 subroutine [jvalues::photo\\_lab](#)( ) [private]

6.52.1.3 subroutine [jvalues::photo\\_mbl](#)( ) [private]

## 6.53 /home/sander/e2/messy\_d2.50s\_rs/messy/mbm/caaba/messy-\_sappho\_box.f90 File Reference

### Data Types

- module [messy\\_sappho\\_box](#)

## 6.54 /home/sander/e2/messy\_d2.50s\_rs/messy/mbm/caaba/messy-\_semidep\_box.f90 File Reference

### Data Types

- module [messy\\_semidep\\_box](#)

### Functions/Subroutines

- subroutine [emission\\_default](#)
- subroutine [emission\\_mbl](#)
- subroutine [emission\\_lab](#)
- subroutine [emission\\_mim2](#)
- subroutine [emission\\_isoo](#)
- subroutine [emission\\_ff](#)
- subroutine [emission\\_oomph](#)
- subroutine [drydep\\_ff](#)
- subroutine [drydep\\_mbl](#)
- subroutine [drydep\\_lab](#)
- subroutine [drydep\\_mim2](#)
- subroutine [drydep\\_default](#)

#### 6.54.1 Function/Subroutine Documentation

6.54.1.1 subroutine [drydep::drydep\\_default](#)( ) [private]

6.54.1.2 subroutine [drydep::drydep\\_ff](#)( )

- 6.54.1.3 subroutine drydep::drydep\_lab ( ) [private]
- 6.54.1.4 subroutine drydep::drydep\_mbl ( ) [private]
- 6.54.1.5 subroutine drydep::drydep\_mim2 ( ) [private]
- 6.54.1.6 subroutine emission::emission\_default ( )
- 6.54.1.7 subroutine emission::emission\_ff ( ) [private]
- 6.54.1.8 subroutine emission::emission\_isoo ( ) [private]
- 6.54.1.9 subroutine emission::emission\_lab ( ) [private]
- 6.54.1.10 subroutine emission::emission\_mbl ( ) [private]
- 6.54.1.11 subroutine emission::emission\_mim2 ( ) [private]
- 6.54.1.12 subroutine emission::emission\_oomph ( ) [private]

## 6.55 /home/sander/e2/messy\_d2.50s\_rs/messy/mbm/caaba/messy-\_traject\_box.f90 File Reference

### Data Types

- module [messy\\_traject\\_box](#)

## 6.56 /home/sander/e2/messy\_d2.50s\_rs/messy/mbm/caaba/radjimt.nml File Reference

# Bibliography

- [1] R. Sander, A. Baumgaertner, S. Gromov, H. Harder, P. Jöckel, A. Kerkweg, D. Kubistin, E. Regelin, H. Riede, A. Sandu, D. Taraborrelli, H. Tost, and Z.-Q. Xie. The atmospheric chemistry box model caaba/mecca-3.0. *Geosci. Model Dev.*, 4:373–380, 2011. <http://www.geosci-model-dev.net/4/373/>. 1
