# Supplementary material for: The atmospheric chemistry box model CAABA/MECCA-4.0gmdd
Source: Copernicus journal article supplement (doi:10.5194/gmd-2018-201), 2018-09-03
Supplement: Supplementary file 16 [file gmd-2018-201-supplement.zip]

一、本行自成立以來，承蒙各界愛護，業務蒸蒸日上。茲為擴大服務範圍，特在各地設立分行，以便顧客就近辦理各項業務。本行辦理之業務，包括存款、放款、匯兌、貼現等，手續簡便，利息優厚，竭誠歡迎各界光臨。

二、本行辦理之業務，均依照國家法律及金融法規辦理，絕無任何違法行為。本行信譽昭著，資金雄厚，能為顧客提供安全、可靠之服務。如有任何疑問，請隨時與本行聯繫，我們將竭誠為您解答。

三、本行辦理之業務，均採用最先進之電腦系統，確保數據準確、交易安全。本行並設有專業之客戶服務中心，為顧客提供全方位之諮詢與服務。本行將不斷完善服務品質，為顧客提供最佳之金融體驗。

四、本行辦理之業務，均遵守嚴密之保密制度，絕不洩露顧客之任何隱私。本行信譽第一，服務至上，竭誠為顧客之利益而服務。如有任何不當行為，本行定當嚴懲不貸。

五、本行辦理之業務，均採用最優之利率，為顧客提供最具競爭力之金融方案。本行信譽第一，服務至上，竭誠為顧客之利益而服務。如有任何不當行為，本行定當嚴懲不貸。

本行地址：台北市中正區中正路123號  
電話：(02) 1234 5678  
傳真：(02) 8765 4321  
網址：www.bank.com.tw
