# Supplementary material for: The atmospheric chemistry box model CAABA/MECCA-4.0gmdd
Source: Copernicus journal article supplement (doi:10.5194/gmd-2018-201), 2018-09-03
Supplement: Supplementary file 19 [file gmd-2018-201-supplement.zip]

# Modelling atmospheric chemistry with the CAABA/MECCA box model

Rolf Sander

Max-Planck Institute for Chemistry, Mainz, Germany

CAABA/MECCA workshop  
Mainz

# Agenda

- **PART I: THEORY**

- General Introduction to CAABA/MECCA
- Running CAABA/MECCA: A demonstration

- **BREAK**

- **PART II: PRACTICE**

- The virtual machine
- Running the model
- Plotting the results
- Performing sensitivity studies
- Adapting the model to your project

# Introduction

- Many atmospheric chemistry models have been developed in the past decades.
- Models vary strongly in complexity and efficiency.
- Each aimed at a particular goal, e.g. tropospheric or stratospheric chemistry. . .
- Often no clear separation between meteorological and chemical part of the model.
- When merging different chemistry mechanisms, often incompatibilities between codes occur.
- MESSy contains the comprehensive and flexible atmospheric chemistry module

## MECCA

(Module Efficiently Calculating the Chemistry of the Atmosphere).

# MECCA Chemistry

- 699 gas phase species:
  - 1789 reactions
  - 384 photolysis reactions
- 89 aqueous phase species:
  - 145 reactions
  - 47 gas-aqueous mass transfer reactions
  - 34 acid/base and other equilibria
- Basic  $\text{O}_3$ ,  $\text{CH}_4$ ,  $\text{HO}_x$ , and  $\text{NO}_x$  chemistry
- Tropospheric halogen (Cl, Br, I) and sulfur (S) chemistry from Sander and Crutzen (1996) and von Glasow et al. (2002)
- Tropospheric non-methane hydrocarbon (NMHC) chemistry and MOM isoprene/terpene mechanism (Taraborrelli et al., 2009)
- Stratospheric chemistry based on the model of Steil et al. (1998) and the Mainz Chemical Box Model (Meilinger, 2000)
- Rate coefficients updated according to recent JPL and IUPAC recommendations

## MECCA Chemistry

- Only one master file (gas.eqn) for all gas-phase reactions, e.g.:  
 $\text{O}_2 + \text{O} = \text{O}_3 : \{ \% \text{UpStTrG} \}$   
 $3.3\text{E-}11 \{ \S 1.1 \} * \text{EXP}(55./\text{temp}) ; \{ \& 3245 \}$

## MECCA Chemistry

- Only one master file (gas.eqn) for all gas-phase reactions, e.g.:  
 $\text{<G1000> } \text{O}_2 + \text{O1D} = \text{O3P} + \text{O}_2 : \{\% \text{UpStTrG}\}$   
 $3.3\text{E-}11\{\S 1.1\} * \text{EXP}(55./\text{temp}); \{\&3245\}$
- Reaction number: <G1000>

## MECCA Chemistry

- Only one master file (gas.eqn) for all gas-phase reactions, e.g.:  
<G1000> O2 + O1D = O3P + O2 : {%UpStTrG}  
3.3E-11{{1.1}\*EXP(55./temp)}; {&3245}
- Reaction number: <G1000>
- Reaction string:  $\text{O}_2 + \text{O}(^1\text{D}) \rightarrow \text{O}(^3\text{P}) + \text{O}_2$

## MECCA Chemistry

- Only one master file (gas.eqn) for all gas-phase reactions, e.g.:  
 $\text{<G1000> } \text{O}_2 + \text{O}(^1\text{D}) = \text{O}_3\text{P} + \text{O}_2 : \{\% \text{UpStTrG}\}$   
 $3.3\text{E-}11\{\$1.1\} * \text{EXP}(55./\text{temp}); \{\&3245\}$
- Reaction number: <G1000>
- Reaction string:  $\text{O}_2 + \text{O}(^1\text{D}) \rightarrow \text{O}(^3\text{P}) + \text{O}_2$
- User-selected subset  $\{\% \text{UpStTrG}\}$  using reaction labels:
  - Up = upper atmosphere
  - St = stratospheric reaction
  - Tr = tropospheric reaction
  - G = gas-phase reaction



## MECCA Chemistry

- Only one master file (gas.eqn) for all gas-phase reactions, e.g.:  
`<G1000> O2 + O1D = O3P + O2 : {%UpStTrG}  
3.3E-11{{1.1}}*EXP(55./temp); {&3245}`
- Reaction number: `<G1000>`
- Reaction string:  $\text{O}_2 + \text{O}(^1\text{D}) \rightarrow \text{O}(^3\text{P}) + \text{O}_2$
- User-selected subset `{%UpStTrG}` using reaction labels:
  - Up = upper atmosphere
  - St = stratospheric reaction
  - Tr = tropospheric reaction
  - G = gas-phase reaction
- Rate coefficient:  $3.3 \times 10^{-11} \exp(55\text{K}/T) \text{ cm}^3/\text{s}$

## MECCA Chemistry

- Only one master file (gas.eqn) for all gas-phase reactions, e.g.:  
`<G1000> O2 + O1D = O3P + O2 : {%UpStTrG}  
 3.3E-11{§1.1}*EXP(55./temp); {&3245}`
- Reaction number: `<G1000>`
- Reaction string:  $\text{O}_2 + \text{O}(^1\text{D}) \rightarrow \text{O}(^3\text{P}) + \text{O}_2$
- User-selected subset `{%UpStTrG}` using reaction labels:
  - Up = upper atmosphere
  - St = stratospheric reaction
  - Tr = tropospheric reaction
  - G = gas-phase reaction
- Rate coefficient:  $3.3 \times 10^{-11} \exp(55\text{K}/T) \text{ cm}^3/\text{s}$
- Uncertainty factor for Monte-Carlo studies: 1.1 (about  $\pm 10 \%$ )

## MECCA Chemistry

- Only one master file (gas.eqn) for all gas-phase reactions, e.g.:  
`<G1000> O2 + O1D = O3P + O2 : {%UpStTrG}  
 3.3E-11{§1.1}*EXP(55./temp); {&3245}`
- Reaction number: <G1000>
- Reaction string:  $\text{O}_2 + \text{O}(^1\text{D}) \rightarrow \text{O}(^3\text{P}) + \text{O}_2$
- User-selected subset {%UpStTrG} using reaction labels:
  - Up = upper atmosphere
  - St = stratospheric reaction
  - Tr = tropospheric reaction
  - G = gas-phase reaction
- Rate coefficient:  $3.3 \times 10^{-11} \exp(55\text{K}/T) \text{ cm}^3/\text{s}$
- Uncertainty factor for Monte-Carlo studies: 1.1 (about  $\pm 10\%$ )
- Reference information: 3245 = JPL recommendation (2015)

# CAABA/MECCA Modularity

- Very modular structure (MESSy standard by Jöckel et al. (2005))
- Link to different meteorological base models

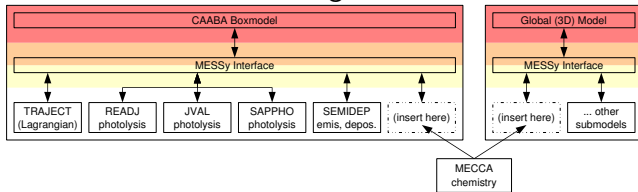

- CAABA = Chemistry As A Boxmodel Application
- Extensive testing in a box model
- Develop parameterization
- Run parameterization in global model runs

# The CAABA Box Model

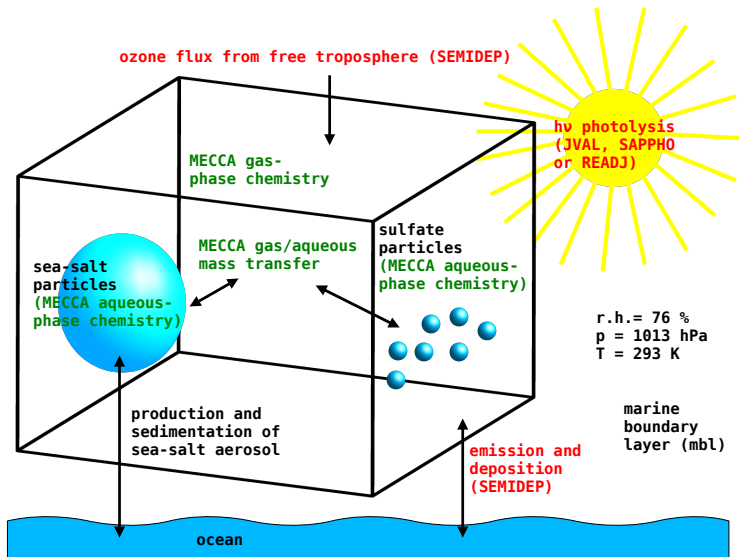

# Box Model Modes

## Box mode:

- static: constant  $T$ ,  $p$ ,  $rh$
- dynamic: Lagrangian along trajectory, variable  $T$ ,  $p$ ,  $rh$

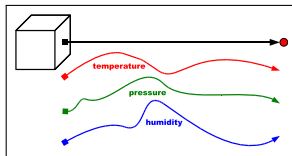

## Steady-state mode:

- initialize with measured long-lived species
- let short-lived species (e.g., OH, HO<sub>2</sub>) run into steady state conditions
- multirun: one run for each measured data point

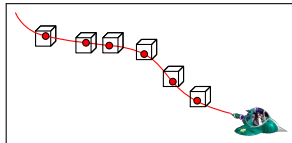

## Trajectory mode:

- initialize with data from global model
- model runs along trajectory
- multirun: one run for each measured data point

## Monte-Carlo mode:

- variation of rate coefficients

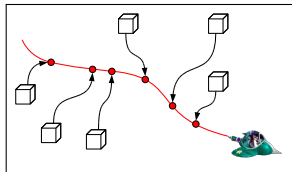

## Namelist

- Control the behaviour of a CAABA/MECCA model run:
  - temperature, pressure, humidity
  - model start and duration
  - output interval
  - select submodels (MECCA, JVAL, SEMIDEP, TRAJECT, ...)
  - scenarios
  - steady-state stop?
  - trajectory file?
- Default: use the same namelist as last time
- For testing: `caaba_simple.nml`

# Scenarios

- describe boundary conditions:
  - photolysis
  - initialization
  - emission
  - dry deposition
- available scenarios:
  - **MBL, OOMPH:** MBL chemistry
  - **FF\_ANTARCTIC, FF\_ARCTIC:** frost flowers and polar ODEs
  - **FREE\_TROP, HOOVER:** free troposphere
  - **STRATO, MTCHEM:** stratosphere and above
  - **LAB, LAB\_C15:** laboratory conditions (reaction chamber)
  - **MIM2:** for isoprene chemistry (Taraborrelli et al., 2009)
  - **???:** add your own...
- select your scenario in namelist file



## Further Information

- Web page:  
<http://www.mecca.messy-interface.org>
- CAABA/MECCA model description paper:  
Sander et al. (2011), GMD, 4, 373-380  
<http://www.geosci-model-dev.net/4/373>
- User manual:  
[manual/caaba\\_mecca\\_manual.pdf](#)
- GPL License

NEXT:

On-screen demo of model run

- Jöckel, P., Sander, R., Kerkweg, A., Tost, H., and Lelieveld, J.: Technical Note: The Modular Earth Submodel System (MESSy) – a new approach towards Earth System Modeling, *Atmos. Chem. Phys.*, 5, 433–444, <http://www.atmos-chem-phys.net/5/433>, 2005.
- Meilinger, S. K.: Heterogeneous Chemistry in the Tropopause Region: Impact of Aircraft Emissions, Ph.D. thesis, ETH Zürich, Switzerland, 2000.
- Sander, R. and Crutzen, P. J.: Model study indicating halogen activation and ozone destruction in polluted air masses transported to the sea, *J. Geophys. Res.*, 101D, 9121–9138, doi:10.1029/95JD03793, 1996.
- Sandu, A. and Sander, R.: Technical note: Simulating chemical systems in Fortran90 and Matlab with the Kinetic PreProcessor KPP-2.1, *Atmos. Chem. Phys.*, 6, 187–195, <http://www.atmos-chem-phys.net/6/187>, 2006.
- Saunders, S. M., Jenkin, M. E., Derwent, R. G., and Pilling, M. J.: World wide web site of a master chemical mechanism (MCM) for use in tropospheric chemistry models, *Atmos. Environ.*, 31, 1249, <http://mcm.leeds.ac.uk/MCM>, 1997.
- Steil, B., Dameris, M., Brühl, C., Crutzen, P. J., Grewe, V., Ponater, M., and Sausen, R.: Development of a chemistry module for GCMs: First results of a multiannual integration, *Ann. Geophys.*, 16, 205–228, 1998.
- Taraborrelli, D., Lawrence, M. G., Butler, T. M., Sander, R., and Lelieveld, J.: Mainz Isoprene Mechanism 2 (MIM2): an isoprene oxidation mechanism for regional and global atmospheric modelling, *Atmos. Chem. Phys.*, 9, 2751–2777, <http://www.atmos-chem-phys.net/9/2751>, 2009.
- von Glasow, R., Sander, R., Bott, A., and Crutzen, P. J.: Modeling halogen chemistry in the marine boundary layer, 1. Cloud-free MBL, *J. Geophys. Res.*, 107D, 4341, doi:10.1029/2001JD000942, 2002.
