# Supplementary material for: The atmospheric chemistry box model CAABA/MECCA-4.0gmdd
Source: Copernicus journal article supplement (doi:10.5194/gmd-2018-201), 2018-09-03
Supplement: Supplementary file 39 [file gmd-2018-201-supplement.zip]

| KPP name  | $H^\ominus$<br>[M/atm] | Reference                       | $\frac{d \ln H^\ominus}{d(1/T)}$ | Reference            |
|-----------|------------------------|---------------------------------|----------------------------------|----------------------|
|           |                        |                                 | [K]                              |                      |
| O1D       | -9.99999               | ???                             | -9.99999                         | ???                  |
| O3P       | -9.99999               | ???                             | -9.99999                         | ???                  |
| O2        | 1.3E-3                 | Wilhelm et al. (1977)           | 1500.                            | ???                  |
| O3        | 1.03E-2                | Burkholder et al. (2015)        | 2830.                            | ???                  |
| H         | -9.99999               | ???                             | -9.99999                         | ???                  |
| H2        | -9.99999               | ???                             | -9.99999                         | ???                  |
| OH        | 3.0E1                  | Hanson et al. (1992)            | 4300.                            | ???                  |
| HO2       | 3.9E3                  | Hanson et al. (1992)            | 5900.                            | ???                  |
| H2O       | BIG_DP                 | see notes                       | 0.                               | ???                  |
| H2O2      | 1.E5                   | Lind and Kok (1994)             | 6338.                            | ???                  |
| H2OH2O    | -9.99999               | ???                             | -9.99999                         | ???                  |
| N         | -9.99999               | ???                             | -9.99999                         | ???                  |
| N2D       | -9.99999               | ???                             | -9.99999                         | ???                  |
| N2        | -9.99999               | ???                             | -9.99999                         | ???                  |
| NH3       | 60.2                   | Burkholder et al. (2015)        | 4160.                            | ???                  |
| N2O       | -9.99999               | ???                             | -9.99999                         | ???                  |
| NO        | 1.9E-3                 | Schwartz and White (1981)       | 1480.                            | ???                  |
| NO2       | 1.2E-2                 | Burkholder et al. (2015)        | 2360.                            | ???                  |
| NO3       | 3.8E-2                 | Burkholder et al. (2015)        | 2000.                            | Berdnikov and Bazhin |
| N2O5      | BIG_DP                 | see notes                       | 0.                               | ???                  |
| HONO      | 4.9E1                  | Schwartz and White (1981)       | 4780.                            | ???                  |
| HNO3      | 2.45E6/1.5E1           | Brimblecombe and Clegg (1989)   | 8694.                            | ???                  |
| HNO4      | 1.26E4                 | Régimbal and Mozurkewich (1997) | 6900.                            | ???                  |
| NH2       | -9.99999               | ???                             | -9.99999                         | ???                  |
| HNO       | -9.99999               | ???                             | -9.99999                         | ???                  |
| NHOH      | -9.99999               | ???                             | -9.99999                         | ???                  |
| NH2O      | -9.99999               | ???                             | -9.99999                         | ???                  |
| NH2OH     | -9.99999               | ???                             | -9.99999                         | ???                  |
| LNITROGEN | -9.99999               | ???                             | -9.99999                         | ???                  |
| CH2OO     | -9.99999               | ???                             | -9.99999                         | ???                  |
| CH2OOA    | -9.99999               | ???                             | -9.99999                         | ???                  |
| CH3       | -9.99999               | ???                             | -9.99999                         | ???                  |
| CH3O      | -9.99999               | ???                             | -9.99999                         | ???                  |
| CH3O2     | 6.                     | Jacob (1986)                    | 5600.                            | ???                  |
| CH3OH     | 2.20E2                 | Snider and Dawson (1985)        | 5200.                            | ???                  |
| CH3OOH    | 3.0E2                  | Lind and Kok (1994)             | 5322.                            | ???                  |
| CH4       | -9.99999               | ???                             | -9.99999                         | ???                  |
| CO        | -9.99999               | ???                             | -9.99999                         | ???                  |
| CO2       | 3.4E-2                 | Sander et al. (2011)            | 2400.                            | ???                  |
| HCHO      | 3.23E3                 | Burkholder et al. (2015)        | 7100.                            | ???                  |
| HCOOH     | 8.9E3                  | Burkholder et al. (2015)        | 6100.                            | ???                  |
| HOCH2O2   | -9.99999               | ???                             | -9.99999                         | ???                  |
| HOCH2OH   | -9.99999               | ???                             | -9.99999                         | ???                  |
| HOCH2OOH  | -9.99999               | ???                             | -9.99999                         | ???                  |
| CH3NO3    | -9.99999               | ???                             | -9.99999                         | ???                  |
| CH3O2NO2  | -9.99999               | ???                             | -9.99999                         | ???                  |

| KPP name   | $H^\ominus$<br>[M/atm] | Reference                | $\frac{d \ln H^\ominus}{d(1/T)}$ | Reference |
|------------|------------------------|--------------------------|----------------------------------|-----------|
|            |                        |                          | [K]                              |           |
| CH3ONO     | -9.99999               | ???                      | -9.99999                         | ???       |
| CN         | -9.99999               | ???                      | -9.99999                         | ???       |
| HCN        | -9.99999               | ???                      | -9.99999                         | ???       |
| HOCH2O2NO2 | -9.99999               | ???                      | -9.99999                         | ???       |
| NCO        | -9.99999               | ???                      | -9.99999                         | ???       |
| LCARBON    | -9.99999               | ???                      | -9.99999                         | ???       |
| C2H2       | -9.99999               | ???                      | -9.99999                         | ???       |
| C2H4       | -9.99999               | ???                      | -9.99999                         | ???       |
| C2H5O2     | 6.                     | see notes                | 5600.                            | ???       |
| C2H5OH     | -9.99999               | ???                      | -9.99999                         | ???       |
| C2H5OOH    | -9.99999               | ???                      | -9.99999                         | ???       |
| C2H6       | -9.99999               | ???                      | -9.99999                         | ???       |
| CH2CHOH    | -9.99999               | ???                      | -9.99999                         | ???       |
| CH2CO      | -9.99999               | ???                      | -9.99999                         | ???       |
| CH3CHO     | 1.29E1                 | Burkholder et al. (2015) | 5890.                            | ???       |
| CH3CHOHO2  | -9.99999               | ???                      | -9.99999                         | ???       |
| CH3CHOHOOH | -9.99999               | ???                      | -9.99999                         | ???       |
| CH3CO      | -9.99999               | ???                      | -9.99999                         | ???       |
| CH3CO2H    | 4.1E3                  | Burkholder et al. (2015) | 6200.                            | ???       |
| CH3CO3     | -9.99999               | ???                      | -9.99999                         | ???       |
| CH3CO3H    | -9.99999               | ???                      | -9.99999                         | ???       |
| ETHGLY     | -9.99999               | ???                      | -9.99999                         | ???       |
| GLYOX      | 4.19E5                 | Burkholder et al. (2015) | 7480.                            | ???       |
| HCOCH2O2   | -9.99999               | ???                      | -9.99999                         | ???       |
| HCOCO      | -9.99999               | ???                      | -9.99999                         | ???       |
| HCOCO2H    | 1.09E4                 | Burkholder et al. (2015) | 4810.                            | ???       |
| HCOCO3     | -9.99999               | ???                      | -9.99999                         | ???       |
| HCOCO3H    | -9.99999               | ???                      | -9.99999                         | ???       |
| HOCH2CH2O  | -9.99999               | ???                      | -9.99999                         | ???       |
| HOCH2CH2O2 | -9.99999               | ???                      | -9.99999                         | ???       |
| HOCH2CHO   | 4.E4                   | Burkholder et al. (2015) | 4630.                            | ???       |
| HOCH2CO    | -9.99999               | ???                      | -9.99999                         | ???       |
| HOCH2CO2H  | 2.83E4                 | Burkholder et al. (2015) | 4030.                            | ???       |
| HOCH2CO3   | -9.99999               | ???                      | -9.99999                         | ???       |
| HOCH2CO3H  | -9.99999               | ???                      | -9.99999                         | ???       |
| HOCHCHO    | -9.99999               | ???                      | -9.99999                         | ???       |
| HOCH2CHO   | -9.99999               | ???                      | -9.99999                         | ???       |
| HOCH2CO2H  | -9.99999               | ???                      | -9.99999                         | ???       |
| HOCH2CO3   | -9.99999               | ???                      | -9.99999                         | ???       |
| HOCH2CO3H  | -9.99999               | ???                      | -9.99999                         | ???       |
| HYETHO2H   | -9.99999               | ???                      | -9.99999                         | ???       |
| C2H5NO3    | -9.99999               | ???                      | -9.99999                         | ???       |
| C2H5O2NO2  | -9.99999               | ???                      | -9.99999                         | ???       |
| CH3CN      | -9.99999               | ???                      | -9.99999                         | ???       |
| ETHOHNO3   | -9.99999               | ???                      | -9.99999                         | ???       |
| NCCH2O2    | -9.99999               | ???                      | -9.99999                         | ???       |

| KPP name      | $H^\ominus$<br>[M/atm] | Reference                     | $\frac{d \ln H^\ominus}{d(1/T)}$<br>[K] | Reference      |
|---------------|------------------------|-------------------------------|-----------------------------------------|----------------|
| NO3CH2CHO     | -9.99999               | ???                           | -9.99999                                | ???            |
| NO3CH2CO3     | -9.99999               | ???                           | -9.99999                                | ???            |
| NO3CH2PAN     | -9.99999               | ???                           | -9.99999                                | ???            |
| PAN           | 2.8                    | Burkholder et al. (2015)      | 5730.                                   | ???            |
| PHAN          | -9.99999               | ???                           | -9.99999                                | ???            |
| ACETOL        | -9.99999               | ???                           | -9.99999                                | ???            |
| ALCOCH2OOH    | -9.99999               | ???                           | -9.99999                                | ???            |
| C2H5CHO       | -9.99999               | ???                           | -9.99999                                | ???            |
| C2H5CO2H      | 5.7E3                  | Khan et al. (1995)            | 6800.                                   | Abraham (1984) |
| C2H5CO3       | -9.99999               | ???                           | -9.99999                                | ???            |
| C2H5CO3H      | -9.99999               | ???                           | -9.99999                                | ???            |
| C33CO         | -9.99999               | ???                           | -9.99999                                | ???            |
| C3H6          | -9.99999               | ???                           | -9.99999                                | ???            |
| C3H8          | -9.99999               | ???                           | -9.99999                                | ???            |
| CH3CHCO       | -9.99999               | ???                           | -9.99999                                | ???            |
| CH3COCH2O2    | -9.99999               | ???                           | -9.99999                                | ???            |
| CH3COCH3      | 27.8                   | Burkholder et al. (2015)      | 5530.                                   | ???            |
| CH3COCO2H     | 3.11E5                 | Burkholder et al. (2015)      | 5090.                                   | ???            |
| CH3COCO3      | -9.99999               | ???                           | -9.99999                                | ???            |
| CH3COCO3H     | -9.99999               | ???                           | -9.99999                                | ???            |
| CHOCOCH2O2    | -9.99999               | ???                           | -9.99999                                | ???            |
| HCOCH2CHO     | -9.99999               | ???                           | -9.99999                                | ???            |
| HCOCH2CO2H    | -9.99999               | ???                           | -9.99999                                | ???            |
| HCOCH2CO3     | -9.99999               | ???                           | -9.99999                                | ???            |
| HCOCH2CO3H    | -9.99999               | ???                           | -9.99999                                | ???            |
| HCOCOCH2OOH   | -9.99999               | ???                           | -9.99999                                | ???            |
| HOC2H4CO2H    | -9.99999               | ???                           | -9.99999                                | ???            |
| HOC2H4CO3     | -9.99999               | ???                           | -9.99999                                | ???            |
| HOC2H4CO3H    | -9.99999               | ???                           | -9.99999                                | ???            |
| HOCH2COCH2O2  | -9.99999               | ???                           | -9.99999                                | ???            |
| HOCH2COCH2OOH | -9.99999               | ???                           | -9.99999                                | ???            |
| HOCH2COCHO    | -9.99999               | ???                           | -9.99999                                | ???            |
| HYPERACET     | -9.99999               | ???                           | -9.99999                                | ???            |
| HYPROPO2      | -9.99999               | ???                           | -9.99999                                | ???            |
| HYPROPO2H     | -9.99999               | ???                           | -9.99999                                | ???            |
| IC3H7O2       | -9.99999               | ???                           | -9.99999                                | ???            |
| IC3H7OOH      | -9.99999               | ???                           | -9.99999                                | ???            |
| IPROPOL       | -9.99999               | ???                           | -9.99999                                | ???            |
| MGLYOX        | 3.5E3                  | Betterton and Hoffmann (1988) | 7500.                                   | ???            |
| NC3H7O2       | -9.99999               | ???                           | -9.99999                                | ???            |
| NC3H7OOH      | -9.99999               | ???                           | -9.99999                                | ???            |
| NROPOL        | -9.99999               | ???                           | -9.99999                                | ???            |
| PROPENOL      | -9.99999               | ???                           | -9.99999                                | ???            |
| C32OH13CO     | -9.99999               | ???                           | -9.99999                                | ???            |
| C3DIALO2      | -9.99999               | ???                           | -9.99999                                | ???            |
| C3DIALOOH     | -9.99999               | ???                           | -9.99999                                | ???            |

| KPP name      | $H^\ominus$<br>[M/atm] | Reference | $\frac{d \ln H^\ominus}{d(1/T)}$ |           |
|---------------|------------------------|-----------|----------------------------------|-----------|
|               |                        |           | [K]                              | Reference |
| HCOCOHCO3     | -9.99999               | ???       | -9.99999                         | ???       |
| HCOCOHCO3H    | -9.99999               | ???       | -9.99999                         | ???       |
| METACETHO     | -9.99999               | ???       | -9.99999                         | ???       |
| C3PAN1        | -9.99999               | ???       | -9.99999                         | ???       |
| C3PAN2        | -9.99999               | ???       | -9.99999                         | ???       |
| CH3COCH2O2NO2 | -9.99999               | ???       | -9.99999                         | ???       |
| IC3H7NO3      | -9.99999               | ???       | -9.99999                         | ???       |
| NC3H7NO3      | -9.99999               | ???       | -9.99999                         | ???       |
| NOA           | -9.99999               | ???       | -9.99999                         | ???       |
| PPN           | -9.99999               | ???       | -9.99999                         | ???       |
| PR2O2HNO3     | -9.99999               | ???       | -9.99999                         | ???       |
| PRONO3BO2     | -9.99999               | ???       | -9.99999                         | ???       |
| PROPOLNO3     | -9.99999               | ???       | -9.99999                         | ???       |
| HCOCOH PAN    | -9.99999               | ???       | -9.99999                         | ???       |
| BIACET        | -9.99999               | ???       | -9.99999                         | ???       |
| BIACETO2      | -9.99999               | ???       | -9.99999                         | ???       |
| BIACETOH      | -9.99999               | ???       | -9.99999                         | ???       |
| BIACETO OH    | -9.99999               | ???       | -9.99999                         | ???       |
| BUT1ENE       | -9.99999               | ???       | -9.99999                         | ???       |
| BUT2OLO       | -9.99999               | ???       | -9.99999                         | ???       |
| BUT2OLO2      | -9.99999               | ???       | -9.99999                         | ???       |
| BUT2OLO OH    | -9.99999               | ???       | -9.99999                         | ???       |
| BUTENOL       | -9.99999               | ???       | -9.99999                         | ???       |
| C312COCO3     | -9.99999               | ???       | -9.99999                         | ???       |
| C312COCO3H    | -9.99999               | ???       | -9.99999                         | ???       |
| C3H7CHO       | -9.99999               | ???       | -9.99999                         | ???       |
| C413COOOH     | -9.99999               | ???       | -9.99999                         | ???       |
| C44O2         | -9.99999               | ???       | -9.99999                         | ???       |
| C44OOH        | -9.99999               | ???       | -9.99999                         | ???       |
| C4CODIAL      | -9.99999               | ???       | -9.99999                         | ???       |
| CBUT2ENE      | -9.99999               | ???       | -9.99999                         | ???       |
| CH3COCHCO     | -9.99999               | ???       | -9.99999                         | ???       |
| CH3COCHO2CHO  | -9.99999               | ???       | -9.99999                         | ???       |
| CH3COCOCO2H   | -9.99999               | ???       | -9.99999                         | ???       |
| CH3COOHCHCHO  | -9.99999               | ???       | -9.99999                         | ???       |
| CHOC3COO2     | -9.99999               | ???       | -9.99999                         | ???       |
| CO23C3CHO     | -9.99999               | ???       | -9.99999                         | ???       |
| CO2C3CHO      | -9.99999               | ???       | -9.99999                         | ???       |
| CO2H3CHO      | -9.99999               | ???       | -9.99999                         | ???       |
| CO2H3CO2H     | -9.99999               | ???       | -9.99999                         | ???       |
| CO2H3CO3      | -9.99999               | ???       | -9.99999                         | ???       |
| CO2H3CO3H     | -9.99999               | ???       | -9.99999                         | ???       |
| EZCH3CO2CHCHO | -9.99999               | ???       | -9.99999                         | ???       |
| EZCHOCCH3CHO2 | -9.99999               | ???       | -9.99999                         | ???       |
| HCOCCH3CHOOH  | -9.99999               | ???       | -9.99999                         | ???       |
| HCOCCH3CO     | -9.99999               | ???       | -9.99999                         | ???       |

| KPP name     | $H^\ominus$<br>[M/atm] | Reference          | $\frac{d \ln H^\ominus}{d(1/T)}$ | Reference |
|--------------|------------------------|--------------------|----------------------------------|-----------|
|              |                        |                    | [K]                              |           |
| HCOCO2CH3CHO | -9.99999               | ???                | -9.99999                         | ???       |
| HMAC         | -9.99999               | ???                | -9.99999                         | ???       |
| HO12CO3C4    | -9.99999               | ???                | -9.99999                         | ???       |
| HVMK         | -9.99999               | ???                | -9.99999                         | ???       |
| IBUTALOH     | -9.99999               | ???                | -9.99999                         | ???       |
| IBUTDIAL     | -9.99999               | ???                | -9.99999                         | ???       |
| IBUTOLBO2    | -9.99999               | ???                | -9.99999                         | ???       |
| IBUTOLBOOH   | -9.99999               | ???                | -9.99999                         | ???       |
| IC4H10       | -9.99999               | ???                | -9.99999                         | ???       |
| IC4H9O2      | -9.99999               | ???                | -9.99999                         | ???       |
| IC4H9OOH     | -9.99999               | ???                | -9.99999                         | ???       |
| IPRCHO       | -9.99999               | ???                | -9.99999                         | ???       |
| IPRCO3       | -9.99999               | ???                | -9.99999                         | ???       |
| IPRHOCO2H    | -9.99999               | ???                | -9.99999                         | ???       |
| IPRHOCO3     | -9.99999               | ???                | -9.99999                         | ???       |
| IPRHOCO3H    | -9.99999               | ???                | -9.99999                         | ???       |
| MACO2        | -9.99999               | ???                | -9.99999                         | ???       |
| MACO2H       | 2.58E3                 | Khan et al. (1992) | 0.                               | ???       |
| MACO3        | -9.99999               | ???                | -9.99999                         | ???       |
| MACO3H       | -9.99999               | ???                | -9.99999                         | ???       |
| MACR         | -9.99999               | ???                | -9.99999                         | ???       |
| MACRO        | -9.99999               | ???                | -9.99999                         | ???       |
| MACRO2       | -9.99999               | ???                | -9.99999                         | ???       |
| MACROH       | -9.99999               | ???                | -9.99999                         | ???       |
| MACROOH      | -9.99999               | ???                | -9.99999                         | ???       |
| MBOOO        | -9.99999               | ???                | -9.99999                         | ???       |
| MEK          | -9.99999               | ???                | -9.99999                         | ???       |
| MEPROPENE    | -9.99999               | ???                | -9.99999                         | ???       |
| MPROPENOL    | -9.99999               | ???                | -9.99999                         | ???       |
| MVK          | -9.99999               | ???                | -9.99999                         | ???       |
| NC4H10       | -9.99999               | ???                | -9.99999                         | ???       |
| PERIBUACID   | -9.99999               | ???                | -9.99999                         | ???       |
| TBUT2ENE     | -9.99999               | ???                | -9.99999                         | ???       |
| TC4H9O2      | -9.99999               | ???                | -9.99999                         | ???       |
| TC4H9OOH     | -9.99999               | ???                | -9.99999                         | ???       |
| BZFUCO       | -9.99999               | ???                | -9.99999                         | ???       |
| BZFUO2       | -9.99999               | ???                | -9.99999                         | ???       |
| BZFUONE      | -9.99999               | ???                | -9.99999                         | ???       |
| BZFUOOH      | -9.99999               | ???                | -9.99999                         | ???       |
| CO14O3CHO    | -9.99999               | ???                | -9.99999                         | ???       |
| CO14O3CO2H   | -9.99999               | ???                | -9.99999                         | ???       |
| CO2C4DIAL    | -9.99999               | ???                | -9.99999                         | ???       |
| EPXC4DIAL    | -9.99999               | ???                | -9.99999                         | ???       |
| EPXDLCO2H    | -9.99999               | ???                | -9.99999                         | ???       |
| EPXDLCO3     | -9.99999               | ???                | -9.99999                         | ???       |
| EPXDLCO3H    | -9.99999               | ???                | -9.99999                         | ???       |

| KPP name       | $H^\ominus$<br>[M/atm] | Reference | $\frac{d \ln H^\ominus}{d(1/T)}$ |           |
|----------------|------------------------|-----------|----------------------------------|-----------|
|                |                        |           | [K]                              | Reference |
| HOCOC4DIAL     | -9.99999               | ???       | -9.99999                         | ???       |
| MALANHY        | -9.99999               | ???       | -9.99999                         | ???       |
| MALANHYO2      | -9.99999               | ???       | -9.99999                         | ???       |
| MALANHYOOH     | -9.99999               | ???       | -9.99999                         | ???       |
| MALDALCO2H     | -9.99999               | ???       | -9.99999                         | ???       |
| MALDALCO3H     | -9.99999               | ???       | -9.99999                         | ???       |
| MALDIAL        | -9.99999               | ???       | -9.99999                         | ???       |
| MALDIALCO3     | -9.99999               | ???       | -9.99999                         | ???       |
| MALDIALO2      | -9.99999               | ???       | -9.99999                         | ???       |
| MALDIALOOH     | -9.99999               | ???       | -9.99999                         | ???       |
| MALNHYOHCO     | -9.99999               | ???       | -9.99999                         | ???       |
| MECOACEOOH     | -9.99999               | ???       | -9.99999                         | ???       |
| MECOACETO2     | -9.99999               | ???       | -9.99999                         | ???       |
| BUT2OLNO3      | -9.99999               | ???       | -9.99999                         | ???       |
| C312COPAN      | -9.99999               | ???       | -9.99999                         | ???       |
| C4PAN5         | -9.99999               | ???       | -9.99999                         | ???       |
| IBUTOLBNO3     | -9.99999               | ???       | -9.99999                         | ???       |
| IC4H9NO3       | -9.99999               | ???       | -9.99999                         | ???       |
| MACRN          | -9.99999               | ???       | -9.99999                         | ???       |
| MPAN           | -9.99999               | ???       | -9.99999                         | ???       |
| MVKNO3         | -9.99999               | ???       | -9.99999                         | ???       |
| PIPN           | -9.99999               | ???       | -9.99999                         | ???       |
| TC4H9NO3       | -9.99999               | ???       | -9.99999                         | ???       |
| EPXDLPAN       | -9.99999               | ???       | -9.99999                         | ???       |
| MALDIALPAN     | -9.99999               | ???       | -9.99999                         | ???       |
| NBZFUO2        | -9.99999               | ???       | -9.99999                         | ???       |
| NBZFUONE       | -9.99999               | ???       | -9.99999                         | ???       |
| NBZFUOOH       | -9.99999               | ???       | -9.99999                         | ???       |
| NC4DCO2H       | -9.99999               | ???       | -9.99999                         | ???       |
| LBUT1ENO2      | -9.99999               | ???       | -9.99999                         | ???       |
| LBUT1ENOOH     | -9.99999               | ???       | -9.99999                         | ???       |
| LC4H9O2        | -9.99999               | ???       | -9.99999                         | ???       |
| LC4H9OOH       | -9.99999               | ???       | -9.99999                         | ???       |
| LHMKABO2       | -9.99999               | ???       | -9.99999                         | ???       |
| LHMKABOOH      | -9.99999               | ???       | -9.99999                         | ???       |
| LMEKO2         | -9.99999               | ???       | -9.99999                         | ???       |
| LMEKOOH        | -9.99999               | ???       | -9.99999                         | ???       |
| LBUT1ENNO3     | -9.99999               | ???       | -9.99999                         | ???       |
| LC4H9NO3       | -9.99999               | ???       | -9.99999                         | ???       |
| LMEKNO3        | -9.99999               | ???       | -9.99999                         | ???       |
| C1ODC2O2C4OD   | -9.99999               | ???       | -9.99999                         | ???       |
| C1ODC2O2C4OOH  | -9.99999               | ???       | -9.99999                         | ???       |
| C1ODC2OOHC4OD  | -9.99999               | ???       | -9.99999                         | ???       |
| C1ODC3O2C4OOH  | -9.99999               | ???       | -9.99999                         | ???       |
| C1OOHC2O2C4OD  | -9.99999               | ???       | -9.99999                         | ???       |
| C1OOHC2OOHC4OD | -9.99999               | ???       | -9.99999                         | ???       |

| KPP name      | $H^{\ominus}$ |           | $\frac{d \ln H^{\ominus}}{d(1/T)}$ |           |
|---------------|---------------|-----------|------------------------------------|-----------|
|               | [M/atm]       | Reference | [K]                                | Reference |
| C1OOHC3O2C4OD | -9.99999      | ???       | -9.99999                           | ???       |
| C4MDIAL       | -9.99999      | ???       | -9.99999                           | ???       |
| C511O2        | -9.99999      | ???       | -9.99999                           | ???       |
| C511OOH       | -9.99999      | ???       | -9.99999                           | ???       |
| C512O2        | -9.99999      | ???       | -9.99999                           | ???       |
| C512OOH       | -9.99999      | ???       | -9.99999                           | ???       |
| C513CO        | -9.99999      | ???       | -9.99999                           | ???       |
| C513O2        | -9.99999      | ???       | -9.99999                           | ???       |
| C513OOH       | -9.99999      | ???       | -9.99999                           | ???       |
| C514O2        | -9.99999      | ???       | -9.99999                           | ???       |
| C514OOH       | -9.99999      | ???       | -9.99999                           | ???       |
| C59O2         | -9.99999      | ???       | -9.99999                           | ???       |
| C59OOH        | -9.99999      | ???       | -9.99999                           | ???       |
| C5H8          | -9.99999      | ???       | -9.99999                           | ???       |
| CHOC3COCO3    | -9.99999      | ???       | -9.99999                           | ???       |
| CHOC3COOOH    | -9.99999      | ???       | -9.99999                           | ???       |
| CO13C4CHO     | -9.99999      | ???       | -9.99999                           | ???       |
| CO23C4CHO     | -9.99999      | ???       | -9.99999                           | ???       |
| CO23C4CO3     | -9.99999      | ???       | -9.99999                           | ???       |
| CO23C4CO3H    | -9.99999      | ???       | -9.99999                           | ???       |
| DB1O          | -9.99999      | ???       | -9.99999                           | ???       |
| DB1O2         | -9.99999      | ???       | -9.99999                           | ???       |
| DB1OOH        | -9.99999      | ???       | -9.99999                           | ???       |
| DB2O2         | -9.99999      | ???       | -9.99999                           | ???       |
| DB2OOH        | -9.99999      | ???       | -9.99999                           | ???       |
| HCOC5         | -9.99999      | ???       | -9.99999                           | ???       |
| ISOPAB        | -9.99999      | ???       | -9.99999                           | ???       |
| ISOPAHOH      | -9.99999      | ???       | -9.99999                           | ???       |
| ISOPBO2       | -9.99999      | ???       | -9.99999                           | ???       |
| ISOPBOH       | -9.99999      | ???       | -9.99999                           | ???       |
| ISOPBOOH      | -9.99999      | ???       | -9.99999                           | ???       |
| ISOPCD        | -9.99999      | ???       | -9.99999                           | ???       |
| ISOPDO2       | -9.99999      | ???       | -9.99999                           | ???       |
| ISOPDOH       | -9.99999      | ???       | -9.99999                           | ???       |
| ISOPDOOH      | -9.99999      | ???       | -9.99999                           | ???       |
| MBO           | -9.99999      | ???       | -9.99999                           | ???       |
| MBOACO        | -9.99999      | ???       | -9.99999                           | ???       |
| MBOCOCO       | -9.99999      | ???       | -9.99999                           | ???       |
| ME3FURAN      | -9.99999      | ???       | -9.99999                           | ???       |
| ZCO3C23DBCOD  | -9.99999      | ???       | -9.99999                           | ???       |
| ZCODC23DBCDOH | -9.99999      | ???       | -9.99999                           | ???       |
| ACCOMMECHO    | -9.99999      | ???       | -9.99999                           | ???       |
| ACCOMMECO3    | -9.99999      | ???       | -9.99999                           | ???       |
| ACCOMMECO3H   | -9.99999      | ???       | -9.99999                           | ???       |
| C24O3CCO2H    | -9.99999      | ???       | -9.99999                           | ???       |
| C4CO2DBC03    | -9.99999      | ???       | -9.99999                           | ???       |

| KPP name      | $H^\ominus$<br>[M/atm] | Reference | $\frac{d \ln H^\ominus}{d(1/T)}$ |           |
|---------------|------------------------|-----------|----------------------------------|-----------|
|               |                        |           | [K]                              | Reference |
| C4CO2DCO3H    | -9.99999               | ???       | -9.99999                         | ???       |
| C5134CO2OH    | -9.99999               | ???       | -9.99999                         | ???       |
| C54CO         | -9.99999               | ???       | -9.99999                         | ???       |
| C5CO14O2      | -9.99999               | ???       | -9.99999                         | ???       |
| C5CO14OH      | -9.99999               | ???       | -9.99999                         | ???       |
| C5CO14OOH     | -9.99999               | ???       | -9.99999                         | ???       |
| C5DIALCO      | -9.99999               | ???       | -9.99999                         | ???       |
| C5DIALO2      | -9.99999               | ???       | -9.99999                         | ???       |
| C5DIALOOH     | -9.99999               | ???       | -9.99999                         | ???       |
| C5DICARB      | -9.99999               | ???       | -9.99999                         | ???       |
| C5DICARBO2    | -9.99999               | ???       | -9.99999                         | ???       |
| C5DICAROOH    | -9.99999               | ???       | -9.99999                         | ???       |
| MC3ODBCO2H    | -9.99999               | ???       | -9.99999                         | ???       |
| MMALANHY      | -9.99999               | ???       | -9.99999                         | ???       |
| MMALANHYO2    | -9.99999               | ???       | -9.99999                         | ???       |
| MMALNHYOOH    | -9.99999               | ???       | -9.99999                         | ???       |
| TLFUO2        | -9.99999               | ???       | -9.99999                         | ???       |
| TLFUONE       | -9.99999               | ???       | -9.99999                         | ???       |
| TLFUOOH       | -9.99999               | ???       | -9.99999                         | ???       |
| C4MCONO3OH    | -9.99999               | ???       | -9.99999                         | ???       |
| C514NO3       | -9.99999               | ???       | -9.99999                         | ???       |
| C5PAN9        | -9.99999               | ???       | -9.99999                         | ???       |
| CHOC3COPAN    | -9.99999               | ???       | -9.99999                         | ???       |
| DB1NO3        | -9.99999               | ???       | -9.99999                         | ???       |
| ISOPBDNO3O2   | -9.99999               | ???       | -9.99999                         | ???       |
| ISOPBNO3      | -9.99999               | ???       | -9.99999                         | ???       |
| ISOPDNO3      | -9.99999               | ???       | -9.99999                         | ???       |
| NC4CHO        | -9.99999               | ???       | -9.99999                         | ???       |
| NC4OHCO3      | -9.99999               | ???       | -9.99999                         | ???       |
| NC4OHCO3H     | -9.99999               | ???       | -9.99999                         | ???       |
| NC4OHCPAN     | -9.99999               | ???       | -9.99999                         | ???       |
| NISOPO2       | -9.99999               | ???       | -9.99999                         | ???       |
| NISOPOOH      | -9.99999               | ???       | -9.99999                         | ???       |
| NMBOBCO       | -9.99999               | ???       | -9.99999                         | ???       |
| ZCPANC23DBCOD | -9.99999               | ???       | -9.99999                         | ???       |
| ACCOMEPAN     | -9.99999               | ???       | -9.99999                         | ???       |
| C4CO2DBPAN    | -9.99999               | ???       | -9.99999                         | ???       |
| C5COO2NO2     | -9.99999               | ???       | -9.99999                         | ???       |
| NC4MDCO2H     | -9.99999               | ???       | -9.99999                         | ???       |
| NTLFUO2       | -9.99999               | ???       | -9.99999                         | ???       |
| NTLFUOOH      | -9.99999               | ???       | -9.99999                         | ???       |
| LC578O2       | -9.99999               | ???       | -9.99999                         | ???       |
| LC578OOH      | -9.99999               | ???       | -9.99999                         | ???       |
| LDISOPACO     | -9.99999               | ???       | -9.99999                         | ???       |
| LDISOPACO2    | -9.99999               | ???       | -9.99999                         | ???       |
| LHC4ACCHO     | -9.99999               | ???       | -9.99999                         | ???       |



| KPP name       | $H^\ominus$<br>[M/atm] | Reference | $\frac{d \ln H^\ominus}{d(1/T)}$ |           |
|----------------|------------------------|-----------|----------------------------------|-----------|
|                |                        |           | [K]                              | Reference |
| LHC4ACCO2H     | -9.99999               | ???       | -9.99999                         | ???       |
| LHC4ACCO3      | -9.99999               | ???       | -9.99999                         | ???       |
| LHC4ACCO3H     | -9.99999               | ???       | -9.99999                         | ???       |
| LIEPOX         | -9.99999               | ???       | -9.99999                         | ???       |
| LISOPACO       | -9.99999               | ???       | -9.99999                         | ???       |
| LISOPACO2      | -9.99999               | ???       | -9.99999                         | ???       |
| LISOPACOOH     | -9.99999               | ???       | -9.99999                         | ???       |
| LISOPEFO       | -9.99999               | ???       | -9.99999                         | ???       |
| LISOPEFO2      | -9.99999               | ???       | -9.99999                         | ???       |
| LMBOABO2       | -9.99999               | ???       | -9.99999                         | ???       |
| LMBOABOOH      | -9.99999               | ???       | -9.99999                         | ???       |
| LME3FURANO2    | -9.99999               | ???       | -9.99999                         | ???       |
| LZCO3HC23DBCOD | -9.99999               | ???       | -9.99999                         | ???       |
| LC5PAN1719     | -9.99999               | ???       | -9.99999                         | ???       |
| LISOPACNO3     | -9.99999               | ???       | -9.99999                         | ???       |
| LISOPACNO3O2   | -9.99999               | ???       | -9.99999                         | ???       |
| LMBOABNO3      | -9.99999               | ???       | -9.99999                         | ???       |
| LNISO3         | -9.99999               | ???       | -9.99999                         | ???       |
| LNISOOH        | -9.99999               | ???       | -9.99999                         | ???       |
| LNMBOABO2      | -9.99999               | ???       | -9.99999                         | ???       |
| LNMBOABOOH     | -9.99999               | ???       | -9.99999                         | ???       |
| C614CO         | -9.99999               | ???       | -9.99999                         | ???       |
| C614O2         | -9.99999               | ???       | -9.99999                         | ???       |
| C614OOH        | -9.99999               | ???       | -9.99999                         | ???       |
| CO235C5CHO     | -9.99999               | ???       | -9.99999                         | ???       |
| CO235C6O2      | -9.99999               | ???       | -9.99999                         | ???       |
| CO235C6OOH     | -9.99999               | ???       | -9.99999                         | ???       |
| BENZENE        | -9.99999               | ???       | -9.99999                         | ???       |
| BZBIPERO2      | -9.99999               | ???       | -9.99999                         | ???       |
| BZBIPEROOH     | -9.99999               | ???       | -9.99999                         | ???       |
| BZEMUCCO       | -9.99999               | ???       | -9.99999                         | ???       |
| BZEMUCCO2H     | -9.99999               | ???       | -9.99999                         | ???       |
| BZEMUCCO3      | -9.99999               | ???       | -9.99999                         | ???       |
| BZEMUCCO3H     | -9.99999               | ???       | -9.99999                         | ???       |
| BZEMUCO2       | -9.99999               | ???       | -9.99999                         | ???       |
| BZEMUCOOH      | -9.99999               | ???       | -9.99999                         | ???       |
| BZEPOXMUC      | -9.99999               | ???       | -9.99999                         | ???       |
| BZOBIPEROH     | -9.99999               | ???       | -9.99999                         | ???       |
| C5CO2DBC03     | -9.99999               | ???       | -9.99999                         | ???       |
| C5CO2DCO3H     | -9.99999               | ???       | -9.99999                         | ???       |
| C5CO2OHCO3     | -9.99999               | ???       | -9.99999                         | ???       |
| C5COOHCO3H     | -9.99999               | ???       | -9.99999                         | ???       |
| C6125CO        | -9.99999               | ???       | -9.99999                         | ???       |
| C615CO2O2      | -9.99999               | ???       | -9.99999                         | ???       |
| C615CO2OOH     | -9.99999               | ???       | -9.99999                         | ???       |
| C6CO4DB        | -9.99999               | ???       | -9.99999                         | ???       |

| KPP name   | $H^\ominus$<br>[M/atm] | Reference | $\frac{d \ln H^\ominus}{d(1/T)}$ |           |
|------------|------------------------|-----------|----------------------------------|-----------|
|            |                        |           | [K]                              | Reference |
| C6H5O      | -9.99999               | ???       | -9.99999                         | ???       |
| C6H5O2     | -9.99999               | ???       | -9.99999                         | ???       |
| C6H5OOH    | -9.99999               | ???       | -9.99999                         | ???       |
| CATEC1O    | -9.99999               | ???       | -9.99999                         | ???       |
| CATEC1O2   | -9.99999               | ???       | -9.99999                         | ???       |
| CATEC1OOH  | -9.99999               | ???       | -9.99999                         | ???       |
| CATECHOL   | -9.99999               | ???       | -9.99999                         | ???       |
| CPDKETENE  | -9.99999               | ???       | -9.99999                         | ???       |
| PBZQCO     | -9.99999               | ???       | -9.99999                         | ???       |
| PBZQO2     | -9.99999               | ???       | -9.99999                         | ???       |
| PBZQONE    | -9.99999               | ???       | -9.99999                         | ???       |
| PBZQOOH    | -9.99999               | ???       | -9.99999                         | ???       |
| PHENO2     | -9.99999               | ???       | -9.99999                         | ???       |
| PHENOL     | -9.99999               | ???       | -9.99999                         | ???       |
| PHENOOH    | -9.99999               | ???       | -9.99999                         | ???       |
| C614NO3    | -9.99999               | ???       | -9.99999                         | ???       |
| BZBIPERNO3 | -9.99999               | ???       | -9.99999                         | ???       |
| BZEMUCNO3  | -9.99999               | ???       | -9.99999                         | ???       |
| BZEMUCPAN  | -9.99999               | ???       | -9.99999                         | ???       |
| C5CO2DBPAN | -9.99999               | ???       | -9.99999                         | ???       |
| C5CO2OHPAN | -9.99999               | ???       | -9.99999                         | ???       |
| DNPHEN     | -9.99999               | ???       | -9.99999                         | ???       |
| DNPHENO2   | -9.99999               | ???       | -9.99999                         | ???       |
| DNPHENOOH  | -9.99999               | ???       | -9.99999                         | ???       |
| HOC6H4NO2  | -9.99999               | ???       | -9.99999                         | ???       |
| NBZQO2     | -9.99999               | ???       | -9.99999                         | ???       |
| NBZQOOH    | -9.99999               | ???       | -9.99999                         | ???       |
| NCATECHOL  | -9.99999               | ???       | -9.99999                         | ???       |
| NCATECO2   | -9.99999               | ???       | -9.99999                         | ???       |
| NCATECOOH  | -9.99999               | ???       | -9.99999                         | ???       |
| NCPDKETENE | -9.99999               | ???       | -9.99999                         | ???       |
| NDNPHENO2  | -9.99999               | ???       | -9.99999                         | ???       |
| NDNPHENOOH | -9.99999               | ???       | -9.99999                         | ???       |
| NNCATECO2  | -9.99999               | ???       | -9.99999                         | ???       |
| NNCATECOOH | -9.99999               | ???       | -9.99999                         | ???       |
| NPHEN1O    | -9.99999               | ???       | -9.99999                         | ???       |
| NPHEN1O2   | -9.99999               | ???       | -9.99999                         | ???       |
| NPHEN1OOH  | -9.99999               | ???       | -9.99999                         | ???       |
| NPHENO2    | -9.99999               | ???       | -9.99999                         | ???       |
| NPHENOOH   | -9.99999               | ???       | -9.99999                         | ???       |
| C235C6CO3H | -9.99999               | ???       | -9.99999                         | ???       |
| C716O2     | -9.99999               | ???       | -9.99999                         | ???       |
| C716OOH    | -9.99999               | ???       | -9.99999                         | ???       |
| C721O2     | -9.99999               | ???       | -9.99999                         | ???       |
| C721OOH    | -9.99999               | ???       | -9.99999                         | ???       |
| C722O2     | -9.99999               | ???       | -9.99999                         | ???       |

| KPP name   | $H^\ominus$<br>[M/atm] | Reference        | $\frac{d \ln H^\ominus}{d(1/T)}$ | Reference |
|------------|------------------------|------------------|----------------------------------|-----------|
|            |                        |                  | [K]                              |           |
| C722OOH    | -9.99999               | ???              | -9.99999                         | ???       |
| CO235C6CHO | -9.99999               | ???              | -9.99999                         | ???       |
| CO235C6CO3 | -9.99999               | ???              | -9.99999                         | ???       |
| MCPDKETENE | -9.99999               | ???              | -9.99999                         | ???       |
| ROO6R3O    | -9.99999               | ???              | -9.99999                         | ???       |
| ROO6R3O2   | -9.99999               | ???              | -9.99999                         | ???       |
| ROO6R5O2   | -9.99999               | ???              | -9.99999                         | ???       |
| BENZAL     | -9.99999               | ???              | -9.99999                         | ???       |
| C6CO2OHCO3 | -9.99999               | ???              | -9.99999                         | ???       |
| C6COOHCO3H | -9.99999               | ???              | -9.99999                         | ???       |
| C6H5CH2O2  | -9.99999               | ???              | -9.99999                         | ???       |
| C6H5CH2OOH | -9.99999               | ???              | -9.99999                         | ???       |
| C6H5CO3    | -9.99999               | ???              | -9.99999                         | ???       |
| C6H5CO3H   | -9.99999               | ???              | -9.99999                         | ???       |
| C7CO4DB    | -9.99999               | ???              | -9.99999                         | ???       |
| CRESO2     | -9.99999               | ???              | -9.99999                         | ???       |
| CRESOL     | -9.99999               | ???              | -9.99999                         | ???       |
| CRESOOH    | -9.99999               | ???              | -9.99999                         | ???       |
| MCATEC1O   | -9.99999               | ???              | -9.99999                         | ???       |
| MCATEC1O2  | -9.99999               | ???              | -9.99999                         | ???       |
| MCATEC1OOH | -9.99999               | ???              | -9.99999                         | ???       |
| MCATECHOL  | -9.99999               | ???              | -9.99999                         | ???       |
| OXYL1O2    | -9.99999               | ???              | -9.99999                         | ???       |
| OXYL1OOH   | -9.99999               | ???              | -9.99999                         | ???       |
| PHCOOH     | 1.4E4                  | Goldstein (1982) | 6500.                            | ???       |
| PTLQCO     | -9.99999               | ???              | -9.99999                         | ???       |
| PTLQO2     | -9.99999               | ???              | -9.99999                         | ???       |
| PTLQONE    | -9.99999               | ???              | -9.99999                         | ???       |
| PTLQOOH    | -9.99999               | ???              | -9.99999                         | ???       |
| TLBIPERO2  | -9.99999               | ???              | -9.99999                         | ???       |
| TLBIPEROOH | -9.99999               | ???              | -9.99999                         | ???       |
| TLEMUCCO   | -9.99999               | ???              | -9.99999                         | ???       |
| TLEMUCCO2H | -9.99999               | ???              | -9.99999                         | ???       |
| TLEMUCCO3  | -9.99999               | ???              | -9.99999                         | ???       |
| TLEMUCCO3H | -9.99999               | ???              | -9.99999                         | ???       |
| TLEMUCO2   | -9.99999               | ???              | -9.99999                         | ???       |
| TLEMUCOOH  | -9.99999               | ???              | -9.99999                         | ???       |
| TLEPOXMUC  | -9.99999               | ???              | -9.99999                         | ???       |
| TLOBIPEROH | -9.99999               | ???              | -9.99999                         | ???       |
| TOL1O      | -9.99999               | ???              | -9.99999                         | ???       |
| TOLUENE    | -9.99999               | ???              | -9.99999                         | ???       |
| C7PAN3     | -9.99999               | ???              | -9.99999                         | ???       |
| C6CO2OHPAN | -9.99999               | ???              | -9.99999                         | ???       |
| C6H5CH2NO3 | -9.99999               | ???              | -9.99999                         | ???       |
| DNCRES     | -9.99999               | ???              | -9.99999                         | ???       |
| DNCRESO2   | -9.99999               | ???              | -9.99999                         | ???       |

| KPP name    | $H^{\ominus}$ |           | $\frac{d \ln H^{\ominus}}{d(1/T)}$ |           |
|-------------|---------------|-----------|------------------------------------|-----------|
|             | [M/atm]       | Reference | [K]                                | Reference |
| DNCRESOOH   | -9.99999      | ???       | -9.99999                           | ???       |
| MNCATECH    | -9.99999      | ???       | -9.99999                           | ???       |
| MNCATECO2   | -9.99999      | ???       | -9.99999                           | ???       |
| MNCATECOOH  | -9.99999      | ???       | -9.99999                           | ???       |
| MNCPDKETENE | -9.99999      | ???       | -9.99999                           | ???       |
| MNNCATCOOH  | -9.99999      | ???       | -9.99999                           | ???       |
| MNNCATECO2  | -9.99999      | ???       | -9.99999                           | ???       |
| NCRES1O     | -9.99999      | ???       | -9.99999                           | ???       |
| NCRES1O2    | -9.99999      | ???       | -9.99999                           | ???       |
| NCRES1OOH   | -9.99999      | ???       | -9.99999                           | ???       |
| NCRESO2     | -9.99999      | ???       | -9.99999                           | ???       |
| NCRESOOH    | -9.99999      | ???       | -9.99999                           | ???       |
| NDNCRESO2   | -9.99999      | ???       | -9.99999                           | ???       |
| NDNCRESOOH  | -9.99999      | ???       | -9.99999                           | ???       |
| NPTLQO2     | -9.99999      | ???       | -9.99999                           | ???       |
| NPTLQOOH    | -9.99999      | ???       | -9.99999                           | ???       |
| PBZN        | -9.99999      | ???       | -9.99999                           | ???       |
| TLBIPERNO3  | -9.99999      | ???       | -9.99999                           | ???       |
| TLEMUCNO3   | -9.99999      | ???       | -9.99999                           | ???       |
| TLEMUCPAN   | -9.99999      | ???       | -9.99999                           | ???       |
| TOL1OHNO2   | -9.99999      | ???       | -9.99999                           | ???       |
| C721CHO     | -9.99999      | ???       | -9.99999                           | ???       |
| C721CO3     | -9.99999      | ???       | -9.99999                           | ???       |
| C721CO3H    | -9.99999      | ???       | -9.99999                           | ???       |
| C810O2      | -9.99999      | ???       | -9.99999                           | ???       |
| C810OOH     | -9.99999      | ???       | -9.99999                           | ???       |
| C811O2      | -9.99999      | ???       | -9.99999                           | ???       |
| C812O2      | -9.99999      | ???       | -9.99999                           | ???       |
| C812OOH     | -9.99999      | ???       | -9.99999                           | ???       |
| C813O2      | -9.99999      | ???       | -9.99999                           | ???       |
| C813OOH     | -9.99999      | ???       | -9.99999                           | ???       |
| C85O2       | -9.99999      | ???       | -9.99999                           | ???       |
| C85OOH      | -9.99999      | ???       | -9.99999                           | ???       |
| C86O2       | -9.99999      | ???       | -9.99999                           | ???       |
| C86OOH      | -9.99999      | ???       | -9.99999                           | ???       |
| C89O2       | -9.99999      | ???       | -9.99999                           | ???       |
| C89OOH      | -9.99999      | ???       | -9.99999                           | ???       |
| C8BC        | -9.99999      | ???       | -9.99999                           | ???       |
| C8BCCO      | -9.99999      | ???       | -9.99999                           | ???       |
| C8BCO2      | -9.99999      | ???       | -9.99999                           | ???       |
| C8BCOOH     | -9.99999      | ???       | -9.99999                           | ???       |
| NORPINIC    | -9.99999      | ???       | -9.99999                           | ???       |
| EBENZ       | -9.99999      | ???       | -9.99999                           | ???       |
| LXYL        | -9.99999      | ???       | -9.99999                           | ???       |
| STYRENE     | -9.99999      | ???       | -9.99999                           | ???       |
| STYRENO2    | -9.99999      | ???       | -9.99999                           | ???       |

| KPP name   | $H^\ominus$ |           | $\frac{d \ln H^\ominus}{d(1/T)}$ |           |
|------------|-------------|-----------|----------------------------------|-----------|
|            | [M/atm]     | Reference | [K]                              | Reference |
| STYRENOOH  | -9.99999    | ???       | -9.99999                         | ???       |
| C721PAN    | -9.99999    | ???       | -9.99999                         | ???       |
| C810NO3    | -9.99999    | ???       | -9.99999                         | ???       |
| C89NO3     | -9.99999    | ???       | -9.99999                         | ???       |
| C8BCNO3    | -9.99999    | ???       | -9.99999                         | ???       |
| NSTYRENO2  | -9.99999    | ???       | -9.99999                         | ???       |
| NSTYRENOOH | -9.99999    | ???       | -9.99999                         | ???       |
| C811CO3    | -9.99999    | ???       | -9.99999                         | ???       |
| C811CO3H   | -9.99999    | ???       | -9.99999                         | ???       |
| C85CO3     | -9.99999    | ???       | -9.99999                         | ???       |
| C85CO3H    | -9.99999    | ???       | -9.99999                         | ???       |
| C89CO2H    | -9.99999    | ???       | -9.99999                         | ???       |
| C89CO3     | -9.99999    | ???       | -9.99999                         | ???       |
| C89CO3H    | -9.99999    | ???       | -9.99999                         | ???       |
| C96O2      | -9.99999    | ???       | -9.99999                         | ???       |
| C96OOH     | -9.99999    | ???       | -9.99999                         | ???       |
| C97O2      | -9.99999    | ???       | -9.99999                         | ???       |
| C97OOH     | -9.99999    | ???       | -9.99999                         | ???       |
| C98O2      | -9.99999    | ???       | -9.99999                         | ???       |
| C98OOH     | -9.99999    | ???       | -9.99999                         | ???       |
| NOPINDCO   | -9.99999    | ???       | -9.99999                         | ???       |
| NOPINDO2   | -9.99999    | ???       | -9.99999                         | ???       |
| NOPINDOOH  | -9.99999    | ???       | -9.99999                         | ???       |
| NOPINONE   | -9.99999    | ???       | -9.99999                         | ???       |
| NOPINOO    | -9.99999    | ???       | -9.99999                         | ???       |
| NORPINAL   | -9.99999    | ???       | -9.99999                         | ???       |
| NORPINENOL | -9.99999    | ???       | -9.99999                         | ???       |
| PINIC      | -9.99999    | ???       | -9.99999                         | ???       |
| RO6R3P     | -9.99999    | ???       | -9.99999                         | ???       |
| C811PAN    | -9.99999    | ???       | -9.99999                         | ???       |
| C89PAN     | -9.99999    | ???       | -9.99999                         | ???       |
| C96NO3     | -9.99999    | ???       | -9.99999                         | ???       |
| C9PAN2     | -9.99999    | ???       | -9.99999                         | ???       |
| LTMB       | -9.99999    | ???       | -9.99999                         | ???       |
| APINAOO    | -9.99999    | ???       | -9.99999                         | ???       |
| APINBOO    | -9.99999    | ???       | -9.99999                         | ???       |
| APINENE    | -9.99999    | ???       | -9.99999                         | ???       |
| BPINAO2    | -9.99999    | ???       | -9.99999                         | ???       |
| BPINAOOH   | -9.99999    | ???       | -9.99999                         | ???       |
| BPINENE    | -9.99999    | ???       | -9.99999                         | ???       |
| C106O2     | -9.99999    | ???       | -9.99999                         | ???       |
| C106OOH    | -9.99999    | ???       | -9.99999                         | ???       |
| C109CO     | -9.99999    | ???       | -9.99999                         | ???       |
| C109O2     | -9.99999    | ???       | -9.99999                         | ???       |
| C109OOH    | -9.99999    | ???       | -9.99999                         | ???       |
| C96CO3     | -9.99999    | ???       | -9.99999                         | ???       |

| KPP name        | $H^\ominus$<br>[M/atm] | Reference | $\frac{d \ln H^\ominus}{d(1/T)}$ | Reference |
|-----------------|------------------------|-----------|----------------------------------|-----------|
|                 |                        |           | [K]                              |           |
| CAMPHENE        | -9.99999               | ???       | -9.99999                         | ???       |
| CARENE          | -9.99999               | ???       | -9.99999                         | ???       |
| MENTHEN6ONE     | -9.99999               | ???       | -9.99999                         | ???       |
| OH2MENTHEN6ONE  | -9.99999               | ???       | -9.99999                         | ???       |
| OHMENTHEN6ONEO2 | -9.99999               | ???       | -9.99999                         | ???       |
| PERPINONIC      | -9.99999               | ???       | -9.99999                         | ???       |
| PINAL           | -9.99999               | ???       | -9.99999                         | ???       |
| PINALO2         | -9.99999               | ???       | -9.99999                         | ???       |
| PINALOOH        | -9.99999               | ???       | -9.99999                         | ???       |
| PINENOL         | -9.99999               | ???       | -9.99999                         | ???       |
| PINONIC         | -9.99999               | ???       | -9.99999                         | ???       |
| RO6R1O2         | -9.99999               | ???       | -9.99999                         | ???       |
| RO6R3O2         | -9.99999               | ???       | -9.99999                         | ???       |
| RO6R3OOH        | -9.99999               | ???       | -9.99999                         | ???       |
| ROO6R1O2        | -9.99999               | ???       | -9.99999                         | ???       |
| SABINENE        | -9.99999               | ???       | -9.99999                         | ???       |
| BPINANO3        | -9.99999               | ???       | -9.99999                         | ???       |
| C106NO3         | -9.99999               | ???       | -9.99999                         | ???       |
| C10PAN2         | -9.99999               | ???       | -9.99999                         | ???       |
| PINALNO3        | -9.99999               | ???       | -9.99999                         | ???       |
| RO6R1NO3        | -9.99999               | ???       | -9.99999                         | ???       |
| RO6R3NO3        | -9.99999               | ???       | -9.99999                         | ???       |
| ROO6R1NO3       | -9.99999               | ???       | -9.99999                         | ???       |
| LAPINABNO3      | -9.99999               | ???       | -9.99999                         | ???       |
| LAPINABO2       | -9.99999               | ???       | -9.99999                         | ???       |
| LAPINABOOH      | -9.99999               | ???       | -9.99999                         | ???       |
| LNAPINABO2      | -9.99999               | ???       | -9.99999                         | ???       |
| LNAPINABOOH     | -9.99999               | ???       | -9.99999                         | ???       |
| LNBPINABO2      | -9.99999               | ???       | -9.99999                         | ???       |
| LNBPINABOOH     | -9.99999               | ???       | -9.99999                         | ???       |
| LHAROM          | -9.99999               | ???       | -9.99999                         | ???       |
| CHF3            | -9.99999               | ???       | -9.99999                         | ???       |
| CHF2CF3         | -9.99999               | ???       | -9.99999                         | ???       |
| CH3CF3          | -9.99999               | ???       | -9.99999                         | ???       |
| CH2F2           | -9.99999               | ???       | -9.99999                         | ???       |
| CH3CHF2         | -9.99999               | ???       | -9.99999                         | ???       |
| CCl4            | -9.99999               | ???       | -9.99999                         | ???       |
| CF2Cl2          | -9.99999               | ???       | -9.99999                         | ???       |
| CF2ClCF2Cl      | -9.99999               | ???       | -9.99999                         | ???       |
| CF2ClCFC12      | -9.99999               | ???       | -9.99999                         | ???       |
| CF3CF2Cl        | -9.99999               | ???       | -9.99999                         | ???       |
| CFC13           | -9.99999               | ???       | -9.99999                         | ???       |
| CH2Cl2          | -9.99999               | ???       | -9.99999                         | ???       |
| CH2FCF3         | -9.99999               | ???       | -9.99999                         | ???       |
| CH3CCl3         | -9.99999               | ???       | -9.99999                         | ???       |
| CH3CFC12        | -9.99999               | ???       | -9.99999                         | ???       |

| KPP name  | $H^\ominus$<br>[M/atm] | Reference                     | $\frac{d \ln H^\ominus}{d(1/T)}$ | Reference |
|-----------|------------------------|-------------------------------|----------------------------------|-----------|
|           |                        |                               | [K]                              |           |
| CH3Cl     | -9.99999               | ???                           | -9.99999                         | ???       |
| CHCl3     | -9.99999               | ???                           | -9.99999                         | ???       |
| CHF2Cl    | -9.99999               | ???                           | -9.99999                         | ???       |
| Cl        | -9.99999               | ???                           | -9.99999                         | ???       |
| Cl2       | 9.3E-2                 | Sander et al. (2011)          | 2000.                            | ???       |
| Cl2O2     | -9.99999               | ???                           | -9.99999                         | ???       |
| ClNO2     | -9.99999               | ???                           | -9.99999                         | ???       |
| ClNO3     | BIG_DP                 | see notes                     | 0.                               | ???       |
| ClO       | -9.99999               | ???                           | -9.99999                         | ???       |
| HCl       | 2./1.7                 | Brimblecombe and Clegg (1989) | 9000.                            | ???       |
| HOCl      | 6.6E2                  | Burkholder et al. (2015)      | 5880.                            | ???       |
| OCIO      | -9.99999               | ???                           | -9.99999                         | ???       |
| LCHLORINE | -9.99999               | ???                           | -9.99999                         | ???       |
| Br        | -9.99999               | ???                           | -9.99999                         | ???       |
| Br2       | 7.25E-1                | Burkholder et al. (2015)      | 4390.                            | ???       |
| BrCl      | 9.4E-1                 | Bartlett and Margerum (1999)  | 5600.                            | ???       |
| BrNO2     | -9.99999               | ???                           | -9.99999                         | ???       |
| BrNO3     | BIG_DP                 | see notes                     | 0.                               | ???       |
| BrO       | -9.99999               | ???                           | -9.99999                         | ???       |
| CF2ClBr   | -9.99999               | ???                           | -9.99999                         | ???       |
| CF3Br     | -9.99999               | ???                           | -9.99999                         | ???       |
| CH2Br2    | -9.99999               | ???                           | -9.99999                         | ???       |
| CH2ClBr   | -9.99999               | ???                           | -9.99999                         | ???       |
| CH3Br     | -9.99999               | ???                           | -9.99999                         | ???       |
| CHBr3     | -9.99999               | ???                           | -9.99999                         | ???       |
| CHCl2Br   | -9.99999               | ???                           | -9.99999                         | ???       |
| CHClBr2   | -9.99999               | ???                           | -9.99999                         | ???       |
| HBr       | 1.3                    | Brimblecombe and Clegg (1989) | 10000.                           | ???       |
| HOBr      | 1.3E3                  | Blatchley et al. (1992)       | 5862.                            | ???       |
| LBROMINE  | -9.99999               | ???                           | -9.99999                         | ???       |
| C3H7I     | -9.99999               | ???                           | -9.99999                         | ???       |
| CH2CII    | -9.99999               | ???                           | -9.99999                         | ???       |
| CH2I2     | -9.99999               | ???                           | -9.99999                         | ???       |
| CH3I      | -9.99999               | ???                           | -9.99999                         | ???       |
| HI        | BIG_DP                 | see notes                     | 0.                               | ???       |
| HIO3      | BIG_DP                 | see notes                     | 0.                               | ???       |
| HOI       | 4.5E2                  | Chatfield and Crutzen (1990)  | 5862.                            | ???       |
| I         | -9.99999               | ???                           | -9.99999                         | ???       |
| I2        | 3.                     | Palmer et al. (1985)          | 4431.                            | ???       |
| I2O2      | BIG_DP                 | see notes                     | 0.                               | ???       |
| IBr       | 2.4E1                  | see notes                     | 5600.                            | ???       |
| ICl       | 1.1E2                  | see notes                     | 5600.                            | ???       |
| INO2      | BIG_DP                 | see notes                     | 0.                               | ???       |
| INO3      | BIG_DP                 | see notes                     | 0.                               | ???       |
| IO        | 4.5E2                  | see notes                     | 5862.                            | ???       |
| IPART     | -9.99999               | ???                           | -9.99999                         | ???       |

| KPP name   | $H^\ominus$<br>[M/atm] | Reference                     | $\frac{d \ln H^\ominus}{d(1/T)}$<br>[K] | Reference |
|------------|------------------------|-------------------------------|-----------------------------------------|-----------|
| OIO        | BIG_DP                 | see notes                     | 0.                                      | ???       |
| CH3SO2     | -9.99999               | ???                           | -9.99999                                | ???       |
| CH3SO3     | -9.99999               | ???                           | -9.99999                                | ???       |
| CH3SO3H    | BIG_DP                 | see notes                     | 0.                                      | ???       |
| DMS        | 5.4E-1                 | Burkholder et al. (2015)      | 3460.                                   | ???       |
| DMSO       | 9.5E4                  | Watts and Brimblecombe (1987) | 1300.                                   | ???       |
| H2SO4      | 1.E11                  | see notes                     | 0.                                      | ???       |
| OCS        | -9.99999               | ???                           | -9.99999                                | ???       |
| S          | -9.99999               | ???                           | -9.99999                                | ???       |
| SF6        | -9.99999               | ???                           | -9.99999                                | ???       |
| SH         | -9.99999               | ???                           | -9.99999                                | ???       |
| SO         | -9.99999               | ???                           | -9.99999                                | ???       |
| SO2        | 1.3                    | Burkholder et al. (2015)      | 2900.                                   | ???       |
| SO3        | -9.99999               | ???                           | -9.99999                                | ???       |
| LSULFUR    | -9.99999               | ???                           | -9.99999                                | ???       |
| Hg         | 0.13                   | Andersson et al. (2008)       | 2700.                                   | ???       |
| HgO        | 3.2E6                  | Shon et al. (2005)            | 0.                                      | ???       |
| HgCl       | 2.4E7                  | see notes                     | 0.                                      | ???       |
| HgCl2      | 2.4E7                  | Shon et al. (2005)            | 0.                                      | ???       |
| HgBr       | 2.4E7                  | see notes                     | 0.                                      | ???       |
| HgBr2      | 2.4E7                  | see notes                     | 0.                                      | ???       |
| ClHgBr     | 2.4E7                  | see notes                     | 0.                                      | ???       |
| BrHgOBr    | 2.4E7                  | see notes                     | 0.                                      | ???       |
| ClHgOBr    | 2.4E7                  | see notes                     | 0.                                      | ???       |
| LTERP      | -9.99999               | ???                           | -9.99999                                | ???       |
| LALK4      | -9.99999               | ???                           | -9.99999                                | ???       |
| LALK5      | -9.99999               | ???                           | -9.99999                                | ???       |
| LARO1      | -9.99999               | ???                           | -9.99999                                | ???       |
| LARO2      | -9.99999               | ???                           | -9.99999                                | ???       |
| LOLE1      | -9.99999               | ???                           | -9.99999                                | ???       |
| LOLE2      | -9.99999               | ???                           | -9.99999                                | ???       |
| LfPOG02    | -9.99999               | ???                           | -9.99999                                | ???       |
| LfPOG03    | -9.99999               | ???                           | -9.99999                                | ???       |
| LfPOG04    | -9.99999               | ???                           | -9.99999                                | ???       |
| LfPOG05    | -9.99999               | ???                           | -9.99999                                | ???       |
| LbbPOG02   | -9.99999               | ???                           | -9.99999                                | ???       |
| LbbPOG03   | -9.99999               | ???                           | -9.99999                                | ???       |
| LbbPOG04   | -9.99999               | ???                           | -9.99999                                | ???       |
| LfSOGsv01  | -9.99999               | ???                           | -9.99999                                | ???       |
| LfSOGsv02  | -9.99999               | ???                           | -9.99999                                | ???       |
| LbbSOGsv01 | -9.99999               | ???                           | -9.99999                                | ???       |
| LbbSOGsv02 | -9.99999               | ???                           | -9.99999                                | ???       |
| LfSOGiv01  | -9.99999               | ???                           | -9.99999                                | ???       |
| LfSOGiv02  | -9.99999               | ???                           | -9.99999                                | ???       |
| LfSOGiv03  | -9.99999               | ???                           | -9.99999                                | ???       |
| LfSOGiv04  | -9.99999               | ???                           | -9.99999                                | ???       |



| KPP name   | $H^{\ominus}$<br>[M/atm] | Reference                  | $\frac{d \ln H^{\ominus}}{d(1/T)}$ |           |
|------------|--------------------------|----------------------------|------------------------------------|-----------|
|            |                          |                            | [K]                                | Reference |
| LbbSOGiv01 | -9.99999                 | ???                        | -9.99999                           | ???       |
| LbbSOGiv02 | -9.99999                 | ???                        | -9.99999                           | ???       |
| LbbSOGiv03 | -9.99999                 | ???                        | -9.99999                           | ???       |
| LbSOGv01   | -9.99999                 | ???                        | -9.99999                           | ???       |
| LbSOGv02   | -9.99999                 | ???                        | -9.99999                           | ???       |
| LbSOGv03   | -9.99999                 | ???                        | -9.99999                           | ???       |
| LbSOGv04   | -9.99999                 | ???                        | -9.99999                           | ???       |
| LbOSOGv01  | -9.99999                 | ???                        | -9.99999                           | ???       |
| LbOSOGv02  | -9.99999                 | ???                        | -9.99999                           | ???       |
| LbOSOGv03  | -9.99999                 | ???                        | -9.99999                           | ???       |
| LaSOGv01   | -9.99999                 | ???                        | -9.99999                           | ???       |
| LaSOGv02   | -9.99999                 | ???                        | -9.99999                           | ???       |
| LaSOGv03   | -9.99999                 | ???                        | -9.99999                           | ???       |
| LaSOGv04   | -9.99999                 | ???                        | -9.99999                           | ???       |
| LaOSOGv01  | -9.99999                 | ???                        | -9.99999                           | ???       |
| LaOSOGv02  | -9.99999                 | ???                        | -9.99999                           | ???       |
| LaOSOGv03  | -9.99999                 | ???                        | -9.99999                           | ???       |
| ISO2       | -9.99999                 | ???                        | -9.99999                           | ???       |
| ISON       | -9.99999                 | ???                        | -9.99999                           | ???       |
| ISOOH      | -9.99999                 | ???                        | -9.99999                           | ???       |
| LHOC3H6O2  | -9.99999                 | ???                        | -9.99999                           | ???       |
| LHOC3H6OOH | -9.99999                 | ???                        | -9.99999                           | ???       |
| MVKO2      | -9.99999                 | ???                        | -9.99999                           | ???       |
| MVKOOH     | -9.99999                 | ???                        | -9.99999                           | ???       |
| NACA       | -9.99999                 | ???                        | -9.99999                           | ???       |
| ONE        | -9.99999                 | ???                        | -9.99999                           | ???       |
| O          | -9.99999                 | ???                        | -9.99999                           | ???       |
| C          | -9.99999                 | ???                        | -9.99999                           | ???       |
| OXL        | 3.2E6                    | Brimblecombe et al. (1992) | 7285.                              | ???       |

| KPP name  | $k_s$   | Reference |
|-----------|---------|-----------|
| O1D       | 9.99999 | ???       |
| O3P       | 9.99999 | ???       |
| O2        | 9.99999 | ???       |
| O3        | 9.99999 | ???       |
| H         | 9.99999 | ???       |
| H2        | 9.99999 | ???       |
| OH        | 9.99999 | ???       |
| HO2       | 9.99999 | ???       |
| H2O       | 9.99999 | ???       |
| H2O2      | 9.99999 | ???       |
| H2OH2O    | 9.99999 | ???       |
| N         | 9.99999 | ???       |
| N2D       | 9.99999 | ???       |
| N2        | 9.99999 | ???       |
| NH3       | 9.99999 | ???       |
| N2O       | 9.99999 | ???       |
| NO        | 9.99999 | ???       |
| NO2       | 9.99999 | ???       |
| NO3       | 9.99999 | ???       |
| N2O5      | 9.99999 | ???       |
| HONO      | 9.99999 | ???       |
| HNO3      | 9.99999 | ???       |
| HNO4      | 9.99999 | ???       |
| NH2       | 9.99999 | ???       |
| HNO       | 9.99999 | ???       |
| NHOH      | 9.99999 | ???       |
| NH2O      | 9.99999 | ???       |
| NH2OH     | 9.99999 | ???       |
| LNITROGEN | 9.99999 | ???       |
| CH2OO     | 9.99999 | ???       |
| CH2OOA    | 9.99999 | ???       |
| CH3       | 9.99999 | ???       |
| CH3O      | 9.99999 | ???       |
| CH3O2     | 9.99999 | ???       |
| CH3OH     | 9.99999 | ???       |
| CH3OOH    | 9.99999 | ???       |
| CH4       | 9.99999 | ???       |
| CO        | 9.99999 | ???       |
| CO2       | 9.99999 | ???       |
| HCHO      | 9.99999 | ???       |
| HCOOH     | 9.99999 | ???       |
| HOCH2O2   | 9.99999 | ???       |
| HOCH2OH   | 9.99999 | ???       |
| HOCH2OOH  | 9.99999 | ???       |
| CH3NO3    | 9.99999 | ???       |
| CH3O2NO2  | 9.99999 | ???       |
| CH3ONO    | 9.99999 | ???       |
| CN        | 9.99999 | ???       |
| HCN       | 9.99999 | ???       |

| KPP name   | $k_s$   | Reference |
|------------|---------|-----------|
| HOCH2O2NO2 | 9.99999 | ???       |
| NCO        | 9.99999 | ???       |
| LCARBON    | 9.99999 | ???       |
| C2H2       | 9.99999 | ???       |
| C2H4       | 9.99999 | ???       |
| C2H5O2     | 9.99999 | ???       |
| C2H5OH     | 9.99999 | ???       |
| C2H5OOH    | 9.99999 | ???       |
| C2H6       | 9.99999 | ???       |
| CH2CHOH    | 9.99999 | ???       |
| CH2CO      | 9.99999 | ???       |
| CH3CHO     | 9.99999 | ???       |
| CH3CHOHO2  | 9.99999 | ???       |
| CH3CHOHOOH | 9.99999 | ???       |
| CH3CO      | 9.99999 | ???       |
| CH3CO2H    | 9.99999 | ???       |
| CH3CO3     | 9.99999 | ???       |
| CH3CO3H    | 9.99999 | ???       |
| ETHGLY     | 9.99999 | ???       |
| GLYOX      | 9.99999 | ???       |
| HCOCH2O2   | 9.99999 | ???       |
| HCOCO      | 9.99999 | ???       |
| HCOCO2H    | 9.99999 | ???       |
| HCOCO3     | 9.99999 | ???       |
| HCOCO3H    | 9.99999 | ???       |
| HOCH2CH2O  | 9.99999 | ???       |
| HOCH2CH2O2 | 9.99999 | ???       |
| HOCH2CHO   | 9.99999 | ???       |
| HOCH2CO    | 9.99999 | ???       |
| HOCH2CO2H  | 9.99999 | ???       |
| HOCH2CO3   | 9.99999 | ???       |
| HOCH2CO3H  | 9.99999 | ???       |
| HOCHCHO    | 9.99999 | ???       |
| HOOCH2CHO  | 9.99999 | ???       |
| HOOCH2CO2H | 9.99999 | ???       |
| HOOCH2CO3  | 9.99999 | ???       |
| HOOCH2CO3H | 9.99999 | ???       |
| HYETHO2H   | 9.99999 | ???       |
| C2H5NO3    | 9.99999 | ???       |
| C2H5O2NO2  | 9.99999 | ???       |
| CH3CN      | 9.99999 | ???       |
| ETHOHNO3   | 9.99999 | ???       |
| NCCH2O2    | 9.99999 | ???       |
| NO3CH2CHO  | 9.99999 | ???       |
| NO3CH2CO3  | 9.99999 | ???       |
| NO3CH2PAN  | 9.99999 | ???       |
| PAN        | 9.99999 | ???       |
| PHAN       | 9.99999 | ???       |
| ACETOL     | 9.99999 | ???       |

| KPP name      | $k_s$   | Reference |
|---------------|---------|-----------|
| ALCOCH2OOH    | 9.99999 | ???       |
| C2H5CHO       | 9.99999 | ???       |
| C2H5CO2H      | 9.99999 | ???       |
| C2H5CO3       | 9.99999 | ???       |
| C2H5CO3H      | 9.99999 | ???       |
| C33CO         | 9.99999 | ???       |
| C3H6          | 9.99999 | ???       |
| C3H8          | 9.99999 | ???       |
| CH3CHCO       | 9.99999 | ???       |
| CH3COCH2O2    | 9.99999 | ???       |
| CH3COCH3      | 9.99999 | ???       |
| CH3COCO2H     | 9.99999 | ???       |
| CH3COCO3      | 9.99999 | ???       |
| CH3COCO3H     | 9.99999 | ???       |
| CHOCOCH2O2    | 9.99999 | ???       |
| HCOCH2CHO     | 9.99999 | ???       |
| HCOCH2CO2H    | 9.99999 | ???       |
| HCOCH2CO3     | 9.99999 | ???       |
| HCOCH2CO3H    | 9.99999 | ???       |
| HCOCOCH2OOH   | 9.99999 | ???       |
| HOC2H4CO2H    | 9.99999 | ???       |
| HOC2H4CO3     | 9.99999 | ???       |
| HOC2H4CO3H    | 9.99999 | ???       |
| HOCH2COCH2O2  | 9.99999 | ???       |
| HOCH2COCH2OOH | 9.99999 | ???       |
| HOCH2COCHO    | 9.99999 | ???       |
| HYPERACET     | 9.99999 | ???       |
| HYPROPO2      | 9.99999 | ???       |
| HYPROPO2H     | 9.99999 | ???       |
| IC3H7O2       | 9.99999 | ???       |
| IC3H7OOH      | 9.99999 | ???       |
| IPROPOL       | 9.99999 | ???       |
| MGLYOX        | 9.99999 | ???       |
| NC3H7O2       | 9.99999 | ???       |
| NC3H7OOH      | 9.99999 | ???       |
| NPROPOL       | 9.99999 | ???       |
| PROPENOL      | 9.99999 | ???       |
| C32OH13CO     | 9.99999 | ???       |
| C3DIALO2      | 9.99999 | ???       |
| C3DIALOOH     | 9.99999 | ???       |
| HCOCOHCOC3    | 9.99999 | ???       |
| HCOCOHCOC3H   | 9.99999 | ???       |
| METACETHO     | 9.99999 | ???       |
| C3PAN1        | 9.99999 | ???       |
| C3PAN2        | 9.99999 | ???       |
| CH3COCH2O2NO2 | 9.99999 | ???       |
| IC3H7NO3      | 9.99999 | ???       |
| NC3H7NO3      | 9.99999 | ???       |
| NOA           | 9.99999 | ???       |

| KPP name      | $k_s$   | Reference |
|---------------|---------|-----------|
| PPN           | 9.99999 | ???       |
| PR2O2HNO3     | 9.99999 | ???       |
| PRONO3BO2     | 9.99999 | ???       |
| PROPOLNO3     | 9.99999 | ???       |
| HCOCOHPAN     | 9.99999 | ???       |
| BIACET        | 9.99999 | ???       |
| BIACETO2      | 9.99999 | ???       |
| BIACETOH      | 9.99999 | ???       |
| BIACETOOH     | 9.99999 | ???       |
| BUT1ENE       | 9.99999 | ???       |
| BUT2OLO       | 9.99999 | ???       |
| BUT2OLO2      | 9.99999 | ???       |
| BUT2OLOOH     | 9.99999 | ???       |
| BUTENOL       | 9.99999 | ???       |
| C312COCO3     | 9.99999 | ???       |
| C312COCO3H    | 9.99999 | ???       |
| C3H7CHO       | 9.99999 | ???       |
| C413COOOH     | 9.99999 | ???       |
| C44O2         | 9.99999 | ???       |
| C44OOH        | 9.99999 | ???       |
| C4CODIAL      | 9.99999 | ???       |
| CBUT2ENE      | 9.99999 | ???       |
| CH3COCHCO     | 9.99999 | ???       |
| CH3COCHO2CHO  | 9.99999 | ???       |
| CH3COCOCO2H   | 9.99999 | ???       |
| CH3COOHCHCHO  | 9.99999 | ???       |
| CHOC3COO2     | 9.99999 | ???       |
| CO23C3CHO     | 9.99999 | ???       |
| CO2C3CHO      | 9.99999 | ???       |
| CO2H3CHO      | 9.99999 | ???       |
| CO2H3CO2H     | 9.99999 | ???       |
| CO2H3CO3      | 9.99999 | ???       |
| CO2H3CO3H     | 9.99999 | ???       |
| EZCH3CO2CHCHO | 9.99999 | ???       |
| EZCHOCCH3CHO2 | 9.99999 | ???       |
| HCOCCH3CHOOH  | 9.99999 | ???       |
| HCOCCH3CO     | 9.99999 | ???       |
| HCOCO2CH3CHO  | 9.99999 | ???       |
| HMAC          | 9.99999 | ???       |
| HO12CO3C4     | 9.99999 | ???       |
| HVMK          | 9.99999 | ???       |
| IBUTALOH      | 9.99999 | ???       |
| IBUTDIAL      | 9.99999 | ???       |
| IBUTOLBO2     | 9.99999 | ???       |
| IBUTOLBOOH    | 9.99999 | ???       |
| IC4H10        | 9.99999 | ???       |
| IC4H9O2       | 9.99999 | ???       |
| IC4H9OOH      | 9.99999 | ???       |
| IPRCHO        | 9.99999 | ???       |

| KPP name   | $k_s$   | Reference |
|------------|---------|-----------|
| IPRCO3     | 9.99999 | ???       |
| IPRHOCO2H  | 9.99999 | ???       |
| IPRHOCO3   | 9.99999 | ???       |
| IPRHOCO3H  | 9.99999 | ???       |
| MACO2      | 9.99999 | ???       |
| MACO2H     | 9.99999 | ???       |
| MACO3      | 9.99999 | ???       |
| MACO3H     | 9.99999 | ???       |
| MACR       | 9.99999 | ???       |
| MACRO      | 9.99999 | ???       |
| MACRO2     | 9.99999 | ???       |
| MACROH     | 9.99999 | ???       |
| MACROOH    | 9.99999 | ???       |
| MBOOO      | 9.99999 | ???       |
| MEK        | 9.99999 | ???       |
| MEPROPENE  | 9.99999 | ???       |
| MPROPENOL  | 9.99999 | ???       |
| MVK        | 9.99999 | ???       |
| NC4H10     | 9.99999 | ???       |
| PERIBUACID | 9.99999 | ???       |
| TBUT2ENE   | 9.99999 | ???       |
| TC4H9O2    | 9.99999 | ???       |
| TC4H9OOH   | 9.99999 | ???       |
| BZFUCO     | 9.99999 | ???       |
| BZFUO2     | 9.99999 | ???       |
| BZFUONE    | 9.99999 | ???       |
| BZFUOOH    | 9.99999 | ???       |
| CO14O3CHO  | 9.99999 | ???       |
| CO14O3CO2H | 9.99999 | ???       |
| CO2C4DIAL  | 9.99999 | ???       |
| EPXC4DIAL  | 9.99999 | ???       |
| EPXDLCO2H  | 9.99999 | ???       |
| EPXDLCO3   | 9.99999 | ???       |
| EPXDLCO3H  | 9.99999 | ???       |
| HOCOC4DIAL | 9.99999 | ???       |
| MALANHY    | 9.99999 | ???       |
| MALANHYO2  | 9.99999 | ???       |
| MALANHYOOH | 9.99999 | ???       |
| MALDALCO2H | 9.99999 | ???       |
| MALDALCO3H | 9.99999 | ???       |
| MALDIAL    | 9.99999 | ???       |
| MALDIALCO3 | 9.99999 | ???       |
| MALDIALO2  | 9.99999 | ???       |
| MALDIALOOH | 9.99999 | ???       |
| MALNHYOHCO | 9.99999 | ???       |
| MECOACEOOH | 9.99999 | ???       |
| MECOACETO2 | 9.99999 | ???       |
| BUT2OLNO3  | 9.99999 | ???       |
| C312COPAN  | 9.99999 | ???       |

| KPP name       | $k_s$   | Reference |
|----------------|---------|-----------|
| C4PAN5         | 9.99999 | ???       |
| IBUTOLBNO3     | 9.99999 | ???       |
| IC4H9NO3       | 9.99999 | ???       |
| MACRN          | 9.99999 | ???       |
| MPAN           | 9.99999 | ???       |
| MVKNO3         | 9.99999 | ???       |
| PIPN           | 9.99999 | ???       |
| TC4H9NO3       | 9.99999 | ???       |
| EPXDLPAN       | 9.99999 | ???       |
| MALDIALPAN     | 9.99999 | ???       |
| NBZFUO2        | 9.99999 | ???       |
| NBZFUONE       | 9.99999 | ???       |
| NBZFUOOH       | 9.99999 | ???       |
| NC4DCO2H       | 9.99999 | ???       |
| LBUT1ENO2      | 9.99999 | ???       |
| LBUT1ENOOH     | 9.99999 | ???       |
| LC4H9O2        | 9.99999 | ???       |
| LC4H9OOH       | 9.99999 | ???       |
| LHMKABO2       | 9.99999 | ???       |
| LHMKABOOH      | 9.99999 | ???       |
| LMEKO2         | 9.99999 | ???       |
| LMEKOOH        | 9.99999 | ???       |
| LBUT1ENNO3     | 9.99999 | ???       |
| LC4H9NO3       | 9.99999 | ???       |
| LMEKNO3        | 9.99999 | ???       |
| C1ODC2O2C4OD   | 9.99999 | ???       |
| C1ODC2O2C4OOH  | 9.99999 | ???       |
| C1ODC2OOHC4OD  | 9.99999 | ???       |
| C1ODC3O2C4OOH  | 9.99999 | ???       |
| C1OOHC2O2C4OD  | 9.99999 | ???       |
| C1OOHC2OOHC4OD | 9.99999 | ???       |
| C1OOHC3O2C4OD  | 9.99999 | ???       |
| C4MDIAL        | 9.99999 | ???       |
| C511O2         | 9.99999 | ???       |
| C511OOH        | 9.99999 | ???       |
| C512O2         | 9.99999 | ???       |
| C512OOH        | 9.99999 | ???       |
| C513CO         | 9.99999 | ???       |
| C513O2         | 9.99999 | ???       |
| C513OOH        | 9.99999 | ???       |
| C514O2         | 9.99999 | ???       |
| C514OOH        | 9.99999 | ???       |
| C59O2          | 9.99999 | ???       |
| C59OOH         | 9.99999 | ???       |
| C5H8           | 9.99999 | ???       |
| CHOC3COCO3     | 9.99999 | ???       |
| CHOC3COOOH     | 9.99999 | ???       |
| CO13C4CHO      | 9.99999 | ???       |
| CO23C4CHO      | 9.99999 | ???       |

| KPP name      | $k_s$   | Reference |
|---------------|---------|-----------|
| CO23C4CO3     | 9.99999 | ???       |
| CO23C4CO3H    | 9.99999 | ???       |
| DB1O          | 9.99999 | ???       |
| DB1O2         | 9.99999 | ???       |
| DB1OOH        | 9.99999 | ???       |
| DB2O2         | 9.99999 | ???       |
| DB2OOH        | 9.99999 | ???       |
| HCOC5         | 9.99999 | ???       |
| ISOPAB        | 9.99999 | ???       |
| ISOPAOH       | 9.99999 | ???       |
| ISOPBO2       | 9.99999 | ???       |
| ISOPBOH       | 9.99999 | ???       |
| ISOPBOOH      | 9.99999 | ???       |
| ISOPCD        | 9.99999 | ???       |
| ISOPDO2       | 9.99999 | ???       |
| ISOPDOH       | 9.99999 | ???       |
| ISOPDOOH      | 9.99999 | ???       |
| MBO           | 9.99999 | ???       |
| MBOACO        | 9.99999 | ???       |
| MBOCOCO       | 9.99999 | ???       |
| ME3FURAN      | 9.99999 | ???       |
| ZCO3C23DBCOD  | 9.99999 | ???       |
| ZCODC23DBC00H | 9.99999 | ???       |
| ACCOMMECHO    | 9.99999 | ???       |
| ACCOMMECO3    | 9.99999 | ???       |
| ACCOMMECO3H   | 9.99999 | ???       |
| C24O3CCO2H    | 9.99999 | ???       |
| C4CO2DBCO3    | 9.99999 | ???       |
| C4CO2DCO3H    | 9.99999 | ???       |
| C5134CO2OH    | 9.99999 | ???       |
| C54CO         | 9.99999 | ???       |
| C5CO14O2      | 9.99999 | ???       |
| C5CO14OH      | 9.99999 | ???       |
| C5CO14OOH     | 9.99999 | ???       |
| C5DIALCO      | 9.99999 | ???       |
| C5DIALO2      | 9.99999 | ???       |
| C5DIALOOH     | 9.99999 | ???       |
| C5DICARB      | 9.99999 | ???       |
| C5DICARBO2    | 9.99999 | ???       |
| C5DICAROOH    | 9.99999 | ???       |
| MC3ODBCO2H    | 9.99999 | ???       |
| MMALANHY      | 9.99999 | ???       |
| MMALANHYO2    | 9.99999 | ???       |
| MMALNHYOOH    | 9.99999 | ???       |
| TLFUO2        | 9.99999 | ???       |
| TLFUONE       | 9.99999 | ???       |
| TLFUOOH       | 9.99999 | ???       |
| C4MCONO3OH    | 9.99999 | ???       |
| C514NO3       | 9.99999 | ???       |



| KPP name       | $k_s$   | Reference |
|----------------|---------|-----------|
| C5PAN9         | 9.99999 | ???       |
| CHOC3COPAN     | 9.99999 | ???       |
| DB1NO3         | 9.99999 | ???       |
| ISOPBDNO3O2    | 9.99999 | ???       |
| ISOPBNO3       | 9.99999 | ???       |
| ISOPDNO3       | 9.99999 | ???       |
| NC4CHO         | 9.99999 | ???       |
| NC4OHCO3       | 9.99999 | ???       |
| NC4OHCO3H      | 9.99999 | ???       |
| NC4OHCPAN      | 9.99999 | ???       |
| NISOPO2        | 9.99999 | ???       |
| NISOPOOH       | 9.99999 | ???       |
| NMBOBCO        | 9.99999 | ???       |
| ZCPANC23DBCOD  | 9.99999 | ???       |
| ACCOMEPAN      | 9.99999 | ???       |
| C4CO2DBPAN     | 9.99999 | ???       |
| C5COO2NO2      | 9.99999 | ???       |
| NC4MDCO2H      | 9.99999 | ???       |
| NTLFUO2        | 9.99999 | ???       |
| NTLFUOOH       | 9.99999 | ???       |
| LC578O2        | 9.99999 | ???       |
| LC578OOH       | 9.99999 | ???       |
| LDISOPACO      | 9.99999 | ???       |
| LDISOPACO2     | 9.99999 | ???       |
| LHC4ACCHO      | 9.99999 | ???       |
| LHC4ACCO2H     | 9.99999 | ???       |
| LHC4ACCO3      | 9.99999 | ???       |
| LHC4ACCO3H     | 9.99999 | ???       |
| LIEPOX         | 9.99999 | ???       |
| LISOPACO       | 9.99999 | ???       |
| LISOPACO2      | 9.99999 | ???       |
| LISOPACOOH     | 9.99999 | ???       |
| LISOPEFO       | 9.99999 | ???       |
| LISOPEFO2      | 9.99999 | ???       |
| LMBOABO2       | 9.99999 | ???       |
| LMBOABOOH      | 9.99999 | ???       |
| LME3FURANO2    | 9.99999 | ???       |
| LZCO3HC23DBCOD | 9.99999 | ???       |
| LC5PAN1719     | 9.99999 | ???       |
| LISOPACNO3     | 9.99999 | ???       |
| LISOPACNO3O2   | 9.99999 | ???       |
| LMBOABNO3      | 9.99999 | ???       |
| LNISO3         | 9.99999 | ???       |
| LNISOOH        | 9.99999 | ???       |
| LNMBOABO2      | 9.99999 | ???       |
| LNMBOABOOH     | 9.99999 | ???       |
| C614CO         | 9.99999 | ???       |
| C614O2         | 9.99999 | ???       |
| C614OOH        | 9.99999 | ???       |

| KPP name    | $k_s$   | Reference |
|-------------|---------|-----------|
| CO235C5CHO  | 9.99999 | ???       |
| CO235C6O2   | 9.99999 | ???       |
| CO235C6OOH  | 9.99999 | ???       |
| BENZENE     | 9.99999 | ???       |
| BZBIPERO2   | 9.99999 | ???       |
| BZBIPEROOH  | 9.99999 | ???       |
| BZEMUCCO    | 9.99999 | ???       |
| BZEMUCCO2H  | 9.99999 | ???       |
| BZEMUCCO3   | 9.99999 | ???       |
| BZEMUCCO3H  | 9.99999 | ???       |
| BZEMUCO2    | 9.99999 | ???       |
| BZEMUCOOH   | 9.99999 | ???       |
| BZEPOXMUC   | 9.99999 | ???       |
| BZOBIPEROH  | 9.99999 | ???       |
| C5CO2DBCO3  | 9.99999 | ???       |
| C5CO2DCO3H  | 9.99999 | ???       |
| C5CO2OHC O3 | 9.99999 | ???       |
| C5COOHCO3H  | 9.99999 | ???       |
| C6125CO     | 9.99999 | ???       |
| C615CO2O2   | 9.99999 | ???       |
| C615CO2OOH  | 9.99999 | ???       |
| C6CO4DB     | 9.99999 | ???       |
| C6H5O       | 9.99999 | ???       |
| C6H5O2      | 9.99999 | ???       |
| C6H5OOH     | 9.99999 | ???       |
| CATEC1O     | 9.99999 | ???       |
| CATEC1O2    | 9.99999 | ???       |
| CATEC1OOH   | 9.99999 | ???       |
| CATECHOL    | 9.99999 | ???       |
| CPDKETENE   | 9.99999 | ???       |
| PBZQCO      | 9.99999 | ???       |
| PBZQO2      | 9.99999 | ???       |
| PBZQONE     | 9.99999 | ???       |
| PBZQOOH     | 9.99999 | ???       |
| PHENO2      | 9.99999 | ???       |
| PHENOL      | 9.99999 | ???       |
| PHENOOH     | 9.99999 | ???       |
| C614NO3     | 9.99999 | ???       |
| BZBIPERNO3  | 9.99999 | ???       |
| BZEMUCNO3   | 9.99999 | ???       |
| BZEMUCPAN   | 9.99999 | ???       |
| C5CO2DBPAN  | 9.99999 | ???       |
| C5CO2OHPAN  | 9.99999 | ???       |
| DNPHEN      | 9.99999 | ???       |
| DNPHENO2    | 9.99999 | ???       |
| DNPHENOOH   | 9.99999 | ???       |
| HOC6H4NO2   | 9.99999 | ???       |
| NBZQO2      | 9.99999 | ???       |
| NBZQOOH     | 9.99999 | ???       |

| KPP name   | $k_s$   | Reference |
|------------|---------|-----------|
| NCATECHOL  | 9.99999 | ???       |
| NCATECO2   | 9.99999 | ???       |
| NCATECOOH  | 9.99999 | ???       |
| NCPDKETENE | 9.99999 | ???       |
| NDNPHEO2   | 9.99999 | ???       |
| NDNPHEOOH  | 9.99999 | ???       |
| NNCATECO2  | 9.99999 | ???       |
| NNCATECOOH | 9.99999 | ???       |
| NPHEN1O    | 9.99999 | ???       |
| NPHEN1O2   | 9.99999 | ???       |
| NPHEN1OOH  | 9.99999 | ???       |
| NPHENO2    | 9.99999 | ???       |
| NPHENOOH   | 9.99999 | ???       |
| C235C6CO3H | 9.99999 | ???       |
| C716O2     | 9.99999 | ???       |
| C716OOH    | 9.99999 | ???       |
| C721O2     | 9.99999 | ???       |
| C721OOH    | 9.99999 | ???       |
| C722O2     | 9.99999 | ???       |
| C722OOH    | 9.99999 | ???       |
| CO235C6CHO | 9.99999 | ???       |
| CO235C6CO3 | 9.99999 | ???       |
| MCPDKETENE | 9.99999 | ???       |
| ROO6R3O    | 9.99999 | ???       |
| ROO6R3O2   | 9.99999 | ???       |
| ROO6R5O2   | 9.99999 | ???       |
| BENZAL     | 9.99999 | ???       |
| C6CO2OHCO3 | 9.99999 | ???       |
| C6COOHCO3H | 9.99999 | ???       |
| C6H5CH2O2  | 9.99999 | ???       |
| C6H5CH2OOH | 9.99999 | ???       |
| C6H5CO3    | 9.99999 | ???       |
| C6H5CO3H   | 9.99999 | ???       |
| C7CO4DB    | 9.99999 | ???       |
| CRESO2     | 9.99999 | ???       |
| CRESOL     | 9.99999 | ???       |
| CRESOOH    | 9.99999 | ???       |
| MCATEC1O   | 9.99999 | ???       |
| MCATEC1O2  | 9.99999 | ???       |
| MCATEC1OOH | 9.99999 | ???       |
| MCATECHOL  | 9.99999 | ???       |
| OXYL1O2    | 9.99999 | ???       |
| OXYL1OOH   | 9.99999 | ???       |
| PHCOOH     | 9.99999 | ???       |
| PTLQCO     | 9.99999 | ???       |
| PTLQO2     | 9.99999 | ???       |
| PTLQONE    | 9.99999 | ???       |
| PTLQOOH    | 9.99999 | ???       |
| TLBIPERO2  | 9.99999 | ???       |

| KPP name    | $k_s$   | Reference |
|-------------|---------|-----------|
| TLBIPEROOH  | 9.99999 | ???       |
| TLEMUCCO    | 9.99999 | ???       |
| TLEMUCCO2H  | 9.99999 | ???       |
| TLEMUCCO3   | 9.99999 | ???       |
| TLEMUCCO3H  | 9.99999 | ???       |
| TLEMUCO2    | 9.99999 | ???       |
| TLEMUCOOH   | 9.99999 | ???       |
| TLEPOXMUC   | 9.99999 | ???       |
| TLOBIPEROH  | 9.99999 | ???       |
| TOL1O       | 9.99999 | ???       |
| TOLUENE     | 9.99999 | ???       |
| C7PAN3      | 9.99999 | ???       |
| C6CO2OHPAN  | 9.99999 | ???       |
| C6H5CH2NO3  | 9.99999 | ???       |
| DNCRES      | 9.99999 | ???       |
| DNCRESO2    | 9.99999 | ???       |
| DNCRESOOH   | 9.99999 | ???       |
| MNCATECH    | 9.99999 | ???       |
| MNCATECO2   | 9.99999 | ???       |
| MNCATECOOH  | 9.99999 | ???       |
| MNCPDKETENE | 9.99999 | ???       |
| MNNCATCOOH  | 9.99999 | ???       |
| MNNCATECO2  | 9.99999 | ???       |
| NCRES1O     | 9.99999 | ???       |
| NCRES1O2    | 9.99999 | ???       |
| NCRES1OOH   | 9.99999 | ???       |
| NCRESO2     | 9.99999 | ???       |
| NCRESOOH    | 9.99999 | ???       |
| NDNCRESO2   | 9.99999 | ???       |
| NDNCRESOOH  | 9.99999 | ???       |
| NPTLQO2     | 9.99999 | ???       |
| NPTLQOOH    | 9.99999 | ???       |
| PBZN        | 9.99999 | ???       |
| TLBIPERNO3  | 9.99999 | ???       |
| TLEMUCNO3   | 9.99999 | ???       |
| TLEMUCPAN   | 9.99999 | ???       |
| TOL1OHNO2   | 9.99999 | ???       |
| C721CHO     | 9.99999 | ???       |
| C721CO3     | 9.99999 | ???       |
| C721CO3H    | 9.99999 | ???       |
| C810O2      | 9.99999 | ???       |
| C810OOH     | 9.99999 | ???       |
| C811O2      | 9.99999 | ???       |
| C812O2      | 9.99999 | ???       |
| C812OOH     | 9.99999 | ???       |
| C813O2      | 9.99999 | ???       |
| C813OOH     | 9.99999 | ???       |
| C85O2       | 9.99999 | ???       |
| C85OOH      | 9.99999 | ???       |

| KPP name   | $k_s$   | Reference |
|------------|---------|-----------|
| C86O2      | 9.99999 | ???       |
| C86OOH     | 9.99999 | ???       |
| C89O2      | 9.99999 | ???       |
| C89OOH     | 9.99999 | ???       |
| C8BC       | 9.99999 | ???       |
| C8BCCO     | 9.99999 | ???       |
| C8BCO2     | 9.99999 | ???       |
| C8BCOOH    | 9.99999 | ???       |
| NORPINIC   | 9.99999 | ???       |
| EBENZ      | 9.99999 | ???       |
| LXYL       | 9.99999 | ???       |
| STYRENE    | 9.99999 | ???       |
| STYRENO2   | 9.99999 | ???       |
| STYRENOOH  | 9.99999 | ???       |
| C721PAN    | 9.99999 | ???       |
| C810NO3    | 9.99999 | ???       |
| C89NO3     | 9.99999 | ???       |
| C8BCNO3    | 9.99999 | ???       |
| NSTYRENO2  | 9.99999 | ???       |
| NSTYRENOOH | 9.99999 | ???       |
| C811CO3    | 9.99999 | ???       |
| C811CO3H   | 9.99999 | ???       |
| C85CO3     | 9.99999 | ???       |
| C85CO3H    | 9.99999 | ???       |
| C89CO2H    | 9.99999 | ???       |
| C89CO3     | 9.99999 | ???       |
| C89CO3H    | 9.99999 | ???       |
| C96O2      | 9.99999 | ???       |
| C96OOH     | 9.99999 | ???       |
| C97O2      | 9.99999 | ???       |
| C97OOH     | 9.99999 | ???       |
| C98O2      | 9.99999 | ???       |
| C98OOH     | 9.99999 | ???       |
| NOPINDCO   | 9.99999 | ???       |
| NOPINDO2   | 9.99999 | ???       |
| NOPINDOOH  | 9.99999 | ???       |
| NOPINONE   | 9.99999 | ???       |
| NOPINOO    | 9.99999 | ???       |
| NORPINAL   | 9.99999 | ???       |
| NORPINENOL | 9.99999 | ???       |
| PINIC      | 9.99999 | ???       |
| RO6R3P     | 9.99999 | ???       |
| C811PAN    | 9.99999 | ???       |
| C89PAN     | 9.99999 | ???       |
| C96NO3     | 9.99999 | ???       |
| C9PAN2     | 9.99999 | ???       |
| LTMB       | 9.99999 | ???       |
| APINAOO    | 9.99999 | ???       |
| APINBOO    | 9.99999 | ???       |

| KPP name        | $k_s$   | Reference |
|-----------------|---------|-----------|
| APINENE         | 9.99999 | ???       |
| BPINAO2         | 9.99999 | ???       |
| BPINAOOH        | 9.99999 | ???       |
| BPINENE         | 9.99999 | ???       |
| C106O2          | 9.99999 | ???       |
| C106OOH         | 9.99999 | ???       |
| C109CO          | 9.99999 | ???       |
| C109O2          | 9.99999 | ???       |
| C109OOH         | 9.99999 | ???       |
| C96CO3          | 9.99999 | ???       |
| CAMPHENE        | 9.99999 | ???       |
| CARENE          | 9.99999 | ???       |
| MENTHEN6ONE     | 9.99999 | ???       |
| OH2MENTHEN6ONE  | 9.99999 | ???       |
| OHMENTHEN6ONEO2 | 9.99999 | ???       |
| PERPINONIC      | 9.99999 | ???       |
| PINAL           | 9.99999 | ???       |
| PINALO2         | 9.99999 | ???       |
| PINALOOH        | 9.99999 | ???       |
| PINENOL         | 9.99999 | ???       |
| PINONIC         | 9.99999 | ???       |
| RO6R1O2         | 9.99999 | ???       |
| RO6R3O2         | 9.99999 | ???       |
| RO6R3OOH        | 9.99999 | ???       |
| ROO6R1O2        | 9.99999 | ???       |
| SABINENE        | 9.99999 | ???       |
| BPINANO3        | 9.99999 | ???       |
| C106NO3         | 9.99999 | ???       |
| C10PAN2         | 9.99999 | ???       |
| PINALNO3        | 9.99999 | ???       |
| RO6R1NO3        | 9.99999 | ???       |
| RO6R3NO3        | 9.99999 | ???       |
| ROO6R1NO3       | 9.99999 | ???       |
| LAPINABNO3      | 9.99999 | ???       |
| LAPINABO2       | 9.99999 | ???       |
| LAPINABOOH      | 9.99999 | ???       |
| LNAPINABO2      | 9.99999 | ???       |
| LNAPINABOOH     | 9.99999 | ???       |
| LNBPINABO2      | 9.99999 | ???       |
| LNBPINABOOH     | 9.99999 | ???       |
| LHAROM          | 9.99999 | ???       |
| CHF3            | 9.99999 | ???       |
| CHF2CF3         | 9.99999 | ???       |
| CH3CF3          | 9.99999 | ???       |
| CH2F2           | 9.99999 | ???       |
| CH3CHF2         | 9.99999 | ???       |
| CCl4            | 9.99999 | ???       |
| CF2Cl2          | 9.99999 | ???       |
| CF2ClCF2Cl      | 9.99999 | ???       |

| KPP name   | $k_s$   | Reference |
|------------|---------|-----------|
| CF2ClCFCI2 | 9.99999 | ???       |
| CF3CF2Cl   | 9.99999 | ???       |
| CFCI3      | 9.99999 | ???       |
| CH2Cl2     | 9.99999 | ???       |
| CH2FCF3    | 9.99999 | ???       |
| CH3CCl3    | 9.99999 | ???       |
| CH3CFCI2   | 9.99999 | ???       |
| CH3Cl      | 9.99999 | ???       |
| CHCl3      | 9.99999 | ???       |
| CHF2Cl     | 9.99999 | ???       |
| Cl         | 9.99999 | ???       |
| Cl2        | 9.99999 | ???       |
| Cl2O2      | 9.99999 | ???       |
| ClNO2      | 9.99999 | ???       |
| ClNO3      | 9.99999 | ???       |
| ClO        | 9.99999 | ???       |
| HCl        | 9.99999 | ???       |
| HOCl       | 9.99999 | ???       |
| OCIO       | 9.99999 | ???       |
| LCHLORINE  | 9.99999 | ???       |
| Br         | 9.99999 | ???       |
| Br2        | 9.99999 | ???       |
| BrCl       | 9.99999 | ???       |
| BrNO2      | 9.99999 | ???       |
| BrNO3      | 9.99999 | ???       |
| BrO        | 9.99999 | ???       |
| CF2ClBr    | 9.99999 | ???       |
| CF3Br      | 9.99999 | ???       |
| CH2Br2     | 9.99999 | ???       |
| CH2ClBr    | 9.99999 | ???       |
| CH3Br      | 9.99999 | ???       |
| CHBr3      | 9.99999 | ???       |
| CHCl2Br    | 9.99999 | ???       |
| CHClBr2    | 9.99999 | ???       |
| HBr        | 9.99999 | ???       |
| HOBr       | 9.99999 | ???       |
| LBROMINE   | 9.99999 | ???       |
| C3H7I      | 9.99999 | ???       |
| CH2ClI     | 9.99999 | ???       |
| CH2I2      | 9.99999 | ???       |
| CH3I       | 9.99999 | ???       |
| HI         | 9.99999 | ???       |
| HIO3       | 9.99999 | ???       |
| HOI        | 9.99999 | ???       |
| I          | 9.99999 | ???       |
| I2         | 9.99999 | ???       |
| I2O2       | 9.99999 | ???       |
| IBr        | 9.99999 | ???       |
| ICl        | 9.99999 | ???       |

| KPP name   | $k_s$   | Reference |
|------------|---------|-----------|
| INO2       | 9.99999 | ???       |
| INO3       | 9.99999 | ???       |
| IO         | 9.99999 | ???       |
| IPART      | 9.99999 | ???       |
| OIO        | 9.99999 | ???       |
| CH3SO2     | 9.99999 | ???       |
| CH3SO3     | 9.99999 | ???       |
| CH3SO3H    | 9.99999 | ???       |
| DMS        | 9.99999 | ???       |
| DMSO       | 9.99999 | ???       |
| H2SO4      | 9.99999 | ???       |
| OCS        | 9.99999 | ???       |
| S          | 9.99999 | ???       |
| SF6        | 9.99999 | ???       |
| SH         | 9.99999 | ???       |
| SO         | 9.99999 | ???       |
| SO2        | 9.99999 | ???       |
| SO3        | 9.99999 | ???       |
| LSULFUR    | 9.99999 | ???       |
| Hg         | 9.99999 | ???       |
| HgO        | 9.99999 | ???       |
| HgCl       | 9.99999 | ???       |
| HgCl2      | 9.99999 | ???       |
| HgBr       | 9.99999 | ???       |
| HgBr2      | 9.99999 | ???       |
| ClHgBr     | 9.99999 | ???       |
| BrHgOBr    | 9.99999 | ???       |
| ClHgOBr    | 9.99999 | ???       |
| LTERP      | 9.99999 | ???       |
| LALK4      | 9.99999 | ???       |
| LALK5      | 9.99999 | ???       |
| LARO1      | 9.99999 | ???       |
| LARO2      | 9.99999 | ???       |
| LOLE1      | 9.99999 | ???       |
| LOLE2      | 9.99999 | ???       |
| LfPOG02    | 9.99999 | ???       |
| LfPOG03    | 9.99999 | ???       |
| LfPOG04    | 9.99999 | ???       |
| LfPOG05    | 9.99999 | ???       |
| LbbPOG02   | 9.99999 | ???       |
| LbbPOG03   | 9.99999 | ???       |
| LbbPOG04   | 9.99999 | ???       |
| LfSOGsv01  | 9.99999 | ???       |
| LfSOGsv02  | 9.99999 | ???       |
| LbbSOGsv01 | 9.99999 | ???       |
| LbbSOGsv02 | 9.99999 | ???       |
| LfSOGiv01  | 9.99999 | ???       |
| LfSOGiv02  | 9.99999 | ???       |
| LfSOGiv03  | 9.99999 | ???       |



| KPP name   | $k_s$   | Reference |
|------------|---------|-----------|
| LfSOGiv04  | 9.99999 | ???       |
| LbbSOGiv01 | 9.99999 | ???       |
| LbbSOGiv02 | 9.99999 | ???       |
| LbbSOGiv03 | 9.99999 | ???       |
| LbSOGv01   | 9.99999 | ???       |
| LbSOGv02   | 9.99999 | ???       |
| LbSOGv03   | 9.99999 | ???       |
| LbSOGv04   | 9.99999 | ???       |
| LbOSOGv01  | 9.99999 | ???       |
| LbOSOGv02  | 9.99999 | ???       |
| LbOSOGv03  | 9.99999 | ???       |
| LaSOGv01   | 9.99999 | ???       |
| LaSOGv02   | 9.99999 | ???       |
| LaSOGv03   | 9.99999 | ???       |
| LaSOGv04   | 9.99999 | ???       |
| LaOSOGv01  | 9.99999 | ???       |
| LaOSOGv02  | 9.99999 | ???       |
| LaOSOGv03  | 9.99999 | ???       |
| ISO2       | 9.99999 | ???       |
| ISON       | 9.99999 | ???       |
| ISOOH      | 9.99999 | ???       |
| LHOC3H6O2  | 9.99999 | ???       |
| LHOC3H6OOH | 9.99999 | ???       |
| MVKO2      | 9.99999 | ???       |
| MVKOOH     | 9.99999 | ???       |
| NACA       | 9.99999 | ???       |
| ONE        | 9.99999 | ???       |
| O          | 9.99999 | ???       |
| C          | 9.99999 | ???       |
| OXL        | 9.99999 | ???       |

| KPP name  | $\alpha^{\ominus}$ | Reference                    | $\alpha$ -T-dep | Reference |
|-----------|--------------------|------------------------------|-----------------|-----------|
| O1D       | 0.1                | see notes                    | 0.              | ???       |
| O3P       | 0.1                | see notes                    | 0.              | ???       |
| O2        | 0.01               | see notes                    | 2000.           | ???       |
| O3        | 0.002              | DeMore et al. (1997)         | 0.              | ???       |
| H         | 0.1                | see notes                    | 0.              | ???       |
| H2        | 0.1                | see notes                    | 0.              | ???       |
| OH        | 0.01               | Takami et al. (1998)         | 0.              | ???       |
| HO2       | 0.5                | Thornton and Abbatt (2005)   | 0.              | ???       |
| H2O       | 0.0                | see notes                    | 0.              | ???       |
| H2O2      | 0.077              | Worsnop et al. (1989)        | 3127.           | ???       |
| H2OH2O    | 0.1                | see notes                    | 0.              | ???       |
| N         | 0.1                | see notes                    | 0.              | ???       |
| N2D       | 0.1                | see notes                    | 0.              | ???       |
| N2        | 0.1                | see notes                    | 0.              | ???       |
| NH3       | 0.06               | DeMore et al. (1997)         | 0.              | ???       |
| N2O       | 0.1                | see notes                    | 0.              | ???       |
| NO        | 5.0E-5             | Saastad et al. (1993)        | 0.              | ???       |
| NO2       | 0.0015             | Ponche et al. (1993)         | 0.              | ???       |
| NO3       | 0.04               | Rudich et al. (1996)         | 0.              | ???       |
| N2O5      | 0.1                | see notes                    | 0.              | ???       |
| HONO      | 0.04               | DeMore et al. (1997)         | 0.              | ???       |
| HNO3      | 0.5                | Abbatt and Waschewsky (1998) | 0.              | ???       |
| HNO4      | 0.1                | see notes                    | 0.              | ???       |
| NH2       | 0.1                | see notes                    | 0.              | ???       |
| HNO       | 0.1                | see notes                    | 0.              | ???       |
| NHOH      | 0.1                | see notes                    | 0.              | ???       |
| NH2O      | 0.1                | see notes                    | 0.              | ???       |
| NH2OH     | 0.1                | see notes                    | 0.              | ???       |
| LNITROGEN | 0.1                | see notes                    | 0.              | ???       |
| CH2OO     | 0.1                | see notes                    | 0.              | ???       |
| CH2OOA    | 0.1                | see notes                    | 0.              | ???       |
| CH3       | 0.1                | see notes                    | 0.              | ???       |
| CH3O      | 0.1                | see notes                    | 0.              | ???       |
| CH3O2     | 0.01               | see notes                    | 2000.           | ???       |
| CH3OH     | 0.1                | see notes                    | 0.              | ???       |
| CH3OOH    | 0.0046             | Magi et al. (1997)           | 3273.           | ???       |
| CH4       | 0.1                | see notes                    | 0.              | ???       |
| CO        | 0.1                | see notes                    | 0.              | ???       |
| CO2       | 0.01               | see notes                    | 2000.           | ???       |
| HCHO      | 0.04               | DeMore et al. (1997)         | 0.              | ???       |
| HCOOH     | 0.014              | DeMore et al. (1997)         | 3978.           | ???       |
| HOCH2O2   | 0.1                | see notes                    | 0.              | ???       |
| HOCH2OH   | 0.1                | see notes                    | 0.              | ???       |
| HOCH2OOH  | 0.1                | see notes                    | 0.              | ???       |
| CH3NO3    | 0.1                | see notes                    | 0.              | ???       |
| CH3O2NO2  | 0.1                | see notes                    | 0.              | ???       |
| CH3ONO    | 0.1                | see notes                    | 0.              | ???       |
| CN        | 0.1                | see notes                    | 0.              | ???       |
| HCN       | 0.1                | see notes                    | 0.              | ???       |

| KPP name   | $\alpha^{\ominus}$ | Reference                | $\alpha$ -T-dep | Reference |
|------------|--------------------|--------------------------|-----------------|-----------|
| HOCH2O2NO2 | 0.1                | see notes                | 0.              | ???       |
| NCO        | 0.1                | see notes                | 0.              | ???       |
| LCARBON    | 0.1                | see notes                | 0.              | ???       |
| C2H2       | 0.1                | see notes                | 0.              | ???       |
| C2H4       | 0.1                | see notes                | 0.              | ???       |
| C2H5O2     | 0.1                | see notes                | 0.              | ???       |
| C2H5OH     | 0.1                | see notes                | 0.              | ???       |
| C2H5OOH    | 0.1                | see notes                | 0.              | ???       |
| C2H6       | 0.1                | see notes                | 0.              | ???       |
| CH2CHOH    | 0.1                | see notes                | 0.              | ???       |
| CH2CO      | 0.1                | see notes                | 0.              | ???       |
| CH3CHO     | 3.0E-2             | see notes                | 0.              | ???       |
| CH3CHOHO2  | 0.1                | see notes                | 0.              | ???       |
| CH3CHOHOOH | 0.1                | see notes                | 0.              | ???       |
| CH3CO      | 0.1                | see notes                | 0.              | ???       |
| CH3CO2H    | 2.0E-2             | Davidovits et al. (1995) | 4079.           | ???       |
| CH3CO3     | 0.1                | see notes                | 0.              | ???       |
| CH3CO3H    | 0.1                | see notes                | 0.              | ???       |
| ETHGLY     | 0.1                | see notes                | 0.              | ???       |
| GLYOX      | 0.1                | see notes                | 0.              | ???       |
| HCOCH2O2   | 0.1                | see notes                | 0.              | ???       |
| HCOCO      | 0.1                | see notes                | 0.              | ???       |
| HCOCO2H    | 0.1                | see notes                | 0.              | ???       |
| HCOCO3     | 0.1                | see notes                | 0.              | ???       |
| HCOCO3H    | 0.1                | see notes                | 0.              | ???       |
| HOCH2CH2O  | 0.1                | see notes                | 0.              | ???       |
| HOCH2CH2O2 | 0.1                | see notes                | 0.              | ???       |
| HOCH2CHO   | 0.1                | see notes                | 0.              | ???       |
| HOCH2CO    | 0.1                | see notes                | 0.              | ???       |
| HOCH2CO2H  | 0.1                | see notes                | 0.              | ???       |
| HOCH2CO3   | 0.1                | see notes                | 0.              | ???       |
| HOCH2CO3H  | 0.1                | see notes                | 0.              | ???       |
| HOCHCHO    | 0.1                | see notes                | 0.              | ???       |
| HOOCH2CHO  | 0.1                | see notes                | 0.              | ???       |
| HOOCH2CO2H | 0.1                | see notes                | 0.              | ???       |
| HOOCH2CO3  | 0.1                | see notes                | 0.              | ???       |
| HOOCH2CO3H | 0.1                | see notes                | 0.              | ???       |
| HYETHO2H   | 0.1                | see notes                | 0.              | ???       |
| C2H5NO3    | 0.1                | see notes                | 0.              | ???       |
| C2H5O2NO2  | 0.1                | see notes                | 0.              | ???       |
| CH3CN      | 0.1                | see notes                | 0.              | ???       |
| ETHOHNO3   | 0.1                | see notes                | 0.              | ???       |
| NCCH2O2    | 0.1                | see notes                | 0.              | ???       |
| NO3CH2CHO  | 0.1                | see notes                | 0.              | ???       |
| NO3CH2CO3  | 0.1                | see notes                | 0.              | ???       |
| NO3CH2PAN  | 0.1                | see notes                | 0.              | ???       |
| PAN        | 0.1                | see notes                | 0.              | ???       |
| PHAN       | 0.1                | see notes                | 0.              | ???       |
| ACETOL     | 0.1                | see notes                | 0.              | ???       |

| KPP name      | $\alpha^\ominus$ | Reference                | $\alpha$ -T-dep | Reference |
|---------------|------------------|--------------------------|-----------------|-----------|
| ALCOCH2OOH    | 0.1              | see notes                | 0.              | ???       |
| C2H5CHO       | 0.1              | see notes                | 0.              | ???       |
| C2H5CO2H      | 0.1              | see notes                | 0.              | ???       |
| C2H5CO3       | 0.1              | see notes                | 0.              | ???       |
| C2H5CO3H      | 0.1              | see notes                | 0.              | ???       |
| C33CO         | 0.1              | see notes                | 0.              | ???       |
| C3H6          | 0.1              | see notes                | 0.              | ???       |
| C3H8          | 0.1              | see notes                | 0.              | ???       |
| CH3CHCO       | 0.1              | see notes                | 0.              | ???       |
| CH3COCH2O2    | 0.1              | see notes                | 0.              | ???       |
| CH3COCH3      | 3.72E-3          | Davidovits et al. (1995) | 6395.           | ???       |
| CH3COCO2H     | 0.1              | see notes                | 0.              | ???       |
| CH3COCO3      | 0.1              | see notes                | 0.              | ???       |
| CH3COCO3H     | 0.1              | see notes                | 0.              | ???       |
| CHOCOCH2O2    | 0.1              | see notes                | 0.              | ???       |
| HCOCH2CHO     | 0.1              | see notes                | 0.              | ???       |
| HCOCH2CO2H    | 0.1              | see notes                | 0.              | ???       |
| HCOCH2CO3     | 0.1              | see notes                | 0.              | ???       |
| HCOCH2CO3H    | 0.1              | see notes                | 0.              | ???       |
| HCOCOCH2OOH   | 0.1              | see notes                | 0.              | ???       |
| HOC2H4CO2H    | 0.1              | see notes                | 0.              | ???       |
| HOC2H4CO3     | 0.1              | see notes                | 0.              | ???       |
| HOC2H4CO3H    | 0.1              | see notes                | 0.              | ???       |
| HOCH2COCH2O2  | 0.1              | see notes                | 0.              | ???       |
| HOCH2COCH2OOH | 0.1              | see notes                | 0.              | ???       |
| HOCH2COCHO    | 0.1              | see notes                | 0.              | ???       |
| HYPERACET     | 0.1              | see notes                | 0.              | ???       |
| HYPPO2        | 0.1              | see notes                | 0.              | ???       |
| HYPPO2H       | 0.1              | see notes                | 0.              | ???       |
| IC3H7O2       | 0.1              | see notes                | 0.              | ???       |
| IC3H7OOH      | 0.1              | see notes                | 0.              | ???       |
| IPROPOL       | 0.1              | see notes                | 0.              | ???       |
| MGLYOX        | 0.1              | see notes                | 0.              | ???       |
| NC3H7O2       | 0.1              | see notes                | 0.              | ???       |
| NC3H7OOH      | 0.1              | see notes                | 0.              | ???       |
| NPROPOL       | 0.1              | see notes                | 0.              | ???       |
| PROPENOL      | 0.1              | see notes                | 0.              | ???       |
| C32OH13CO     | 0.1              | see notes                | 0.              | ???       |
| C3DIALO2      | 0.1              | see notes                | 0.              | ???       |
| C3DIALOOH     | 0.1              | see notes                | 0.              | ???       |
| HCOCOHCOC3    | 0.1              | see notes                | 0.              | ???       |
| HCOCOHCOC3H   | 0.1              | see notes                | 0.              | ???       |
| METACETHO     | 0.1              | see notes                | 0.              | ???       |
| C3PAN1        | 0.1              | see notes                | 0.              | ???       |
| C3PAN2        | 0.1              | see notes                | 0.              | ???       |
| CH3COCH2O2NO2 | 0.1              | see notes                | 0.              | ???       |
| IC3H7NO3      | 0.1              | see notes                | 0.              | ???       |
| NC3H7NO3      | 0.1              | see notes                | 0.              | ???       |
| NOA           | 0.1              | see notes                | 0.              | ???       |

| KPP name      | $\alpha^{\ominus}$ | Reference | $\alpha$ -T-dep | Reference |
|---------------|--------------------|-----------|-----------------|-----------|
| PPN           | 0.1                | see notes | 0.              | ???       |
| PR2O2HNO3     | 0.1                | see notes | 0.              | ???       |
| PRONO3BO2     | 0.1                | see notes | 0.              | ???       |
| PROPOLNO3     | 0.1                | see notes | 0.              | ???       |
| HCOCOHPAN     | 0.1                | see notes | 0.              | ???       |
| BIACET        | 0.1                | see notes | 0.              | ???       |
| BIACETO2      | 0.1                | see notes | 0.              | ???       |
| BIACETOH      | 0.1                | see notes | 0.              | ???       |
| BIACETOOH     | 0.1                | see notes | 0.              | ???       |
| BUT1ENE       | 0.1                | see notes | 0.              | ???       |
| BUT2OLO       | 0.1                | see notes | 0.              | ???       |
| BUT2OLO2      | 0.1                | see notes | 0.              | ???       |
| BUT2OLOOH     | 0.1                | see notes | 0.              | ???       |
| BUTENOL       | 0.1                | see notes | 0.              | ???       |
| C312COCO3     | 0.1                | see notes | 0.              | ???       |
| C312COCO3H    | 0.1                | see notes | 0.              | ???       |
| C3H7CHO       | 0.1                | see notes | 0.              | ???       |
| C413COOOH     | 0.1                | see notes | 0.              | ???       |
| C44O2         | 0.1                | see notes | 0.              | ???       |
| C44OOH        | 0.1                | see notes | 0.              | ???       |
| C4CODIAL      | 0.1                | see notes | 0.              | ???       |
| CBUT2ENE      | 0.1                | see notes | 0.              | ???       |
| CH3COCHCO     | 0.1                | see notes | 0.              | ???       |
| CH3COCHO2CHO  | 0.1                | see notes | 0.              | ???       |
| CH3COCOCO2H   | 0.1                | see notes | 0.              | ???       |
| CH3COOHCHCHO  | 0.1                | see notes | 0.              | ???       |
| CHOC3COO2     | 0.1                | see notes | 0.              | ???       |
| CO23C3CHO     | 0.1                | see notes | 0.              | ???       |
| CO2C3CHO      | 0.1                | see notes | 0.              | ???       |
| CO2H3CHO      | 0.1                | see notes | 0.              | ???       |
| CO2H3CO2H     | 0.1                | see notes | 0.              | ???       |
| CO2H3CO3      | 0.1                | see notes | 0.              | ???       |
| CO2H3CO3H     | 0.1                | see notes | 0.              | ???       |
| EZCH3CO2CHCHO | 0.1                | see notes | 0.              | ???       |
| EZCHOCCH3CHO2 | 0.1                | see notes | 0.              | ???       |
| HCOCCH3CHOOH  | 0.1                | see notes | 0.              | ???       |
| HCOCCH3CO     | 0.1                | see notes | 0.              | ???       |
| HCOCO2CH3CHO  | 0.1                | see notes | 0.              | ???       |
| HMAC          | 0.1                | see notes | 0.              | ???       |
| HO12CO3C4     | 0.1                | see notes | 0.              | ???       |
| HVMK          | 0.1                | see notes | 0.              | ???       |
| IBUTALOH      | 0.1                | see notes | 0.              | ???       |
| IBUTDIAL      | 0.1                | see notes | 0.              | ???       |
| IBUTOLBO2     | 0.1                | see notes | 0.              | ???       |
| IBUTOLBOOH    | 0.1                | see notes | 0.              | ???       |
| IC4H10        | 0.1                | see notes | 0.              | ???       |
| IC4H9O2       | 0.1                | see notes | 0.              | ???       |
| IC4H9OOH      | 0.1                | see notes | 0.              | ???       |
| IPRCHO        | 0.1                | see notes | 0.              | ???       |

| KPP name   | $\alpha^{\ominus}$ | Reference | $\alpha$ -T-dep | Reference |
|------------|--------------------|-----------|-----------------|-----------|
| IPRCO3     | 0.1                | see notes | 0.              | ???       |
| IPRHOCO2H  | 0.1                | see notes | 0.              | ???       |
| IPRHOCO3   | 0.1                | see notes | 0.              | ???       |
| IPRHOCO3H  | 0.1                | see notes | 0.              | ???       |
| MACO2      | 0.1                | see notes | 0.              | ???       |
| MACO2H     | 0.1                | see notes | 0.              | ???       |
| MACO3      | 0.1                | see notes | 0.              | ???       |
| MACO3H     | 0.1                | see notes | 0.              | ???       |
| MACR       | 0.1                | see notes | 0.              | ???       |
| MACRO      | 0.1                | see notes | 0.              | ???       |
| MACRO2     | 0.1                | see notes | 0.              | ???       |
| MACROH     | 0.1                | see notes | 0.              | ???       |
| MACROOH    | 0.1                | see notes | 0.              | ???       |
| MBOOO      | 0.1                | see notes | 0.              | ???       |
| MEK        | 0.1                | see notes | 0.              | ???       |
| MEPROPENE  | 0.1                | see notes | 0.              | ???       |
| MPROPENOL  | 0.1                | see notes | 0.              | ???       |
| MVK        | 0.1                | see notes | 0.              | ???       |
| NC4H10     | 0.1                | see notes | 0.              | ???       |
| PERIBUACID | 0.1                | see notes | 0.              | ???       |
| TBUT2ENE   | 0.1                | see notes | 0.              | ???       |
| TC4H9O2    | 0.1                | see notes | 0.              | ???       |
| TC4H9OOH   | 0.1                | see notes | 0.              | ???       |
| BZFUCO     | 0.1                | see notes | 0.              | ???       |
| BZFUO2     | 0.1                | see notes | 0.              | ???       |
| BZFUONE    | 0.1                | see notes | 0.              | ???       |
| BZFUOOH    | 0.1                | see notes | 0.              | ???       |
| CO14O3CHO  | 0.1                | see notes | 0.              | ???       |
| CO14O3CO2H | 0.1                | see notes | 0.              | ???       |
| CO2C4DIAL  | 0.1                | see notes | 0.              | ???       |
| EPXC4DIAL  | 0.1                | see notes | 0.              | ???       |
| EPXDLCO2H  | 0.1                | see notes | 0.              | ???       |
| EPXDLCO3   | 0.1                | see notes | 0.              | ???       |
| EPXDLCO3H  | 0.1                | see notes | 0.              | ???       |
| HOCOC4DIAL | 0.1                | see notes | 0.              | ???       |
| MALANHY    | 0.1                | see notes | 0.              | ???       |
| MALANHYO2  | 0.1                | see notes | 0.              | ???       |
| MALANHYOOH | 0.1                | see notes | 0.              | ???       |
| MALDALCO2H | 0.1                | see notes | 0.              | ???       |
| MALDALCO3H | 0.1                | see notes | 0.              | ???       |
| MALDIAL    | 0.1                | see notes | 0.              | ???       |
| MALDIALCO3 | 0.1                | see notes | 0.              | ???       |
| MALDIALO2  | 0.1                | see notes | 0.              | ???       |
| MALDIALOOH | 0.1                | see notes | 0.              | ???       |
| MALNHYOHCO | 0.1                | see notes | 0.              | ???       |
| MECOACEOOH | 0.1                | see notes | 0.              | ???       |
| MECOACETO2 | 0.1                | see notes | 0.              | ???       |
| BUT2OLNO3  | 0.1                | see notes | 0.              | ???       |
| C312COPAN  | 0.1                | see notes | 0.              | ???       |

| KPP name       | $\alpha^\ominus$ | Reference | $\alpha$ -T-dep | Reference |
|----------------|------------------|-----------|-----------------|-----------|
| C4PAN5         | 0.1              | see notes | 0.              | ???       |
| IBUTOLBNO3     | 0.1              | see notes | 0.              | ???       |
| IC4H9NO3       | 0.1              | see notes | 0.              | ???       |
| MACRN          | 0.1              | see notes | 0.              | ???       |
| MPAN           | 0.1              | see notes | 0.              | ???       |
| MVKNO3         | 0.1              | see notes | 0.              | ???       |
| PIPN           | 0.1              | see notes | 0.              | ???       |
| TC4H9NO3       | 0.1              | see notes | 0.              | ???       |
| EPXDLPAN       | 0.1              | see notes | 0.              | ???       |
| MALDIALPAN     | 0.1              | see notes | 0.              | ???       |
| NBZFUO2        | 0.1              | see notes | 0.              | ???       |
| NBZFUONE       | 0.1              | see notes | 0.              | ???       |
| NBZFUOOH       | 0.1              | see notes | 0.              | ???       |
| NC4DCO2H       | 0.1              | see notes | 0.              | ???       |
| LBUT1ENO2      | 0.1              | see notes | 0.              | ???       |
| LBUT1ENOOH     | 0.1              | see notes | 0.              | ???       |
| LC4H9O2        | 0.1              | see notes | 0.              | ???       |
| LC4H9OOH       | 0.1              | see notes | 0.              | ???       |
| LHMKABO2       | 0.1              | see notes | 0.              | ???       |
| LHMKABOOH      | 0.1              | see notes | 0.              | ???       |
| LMEKO2         | 0.1              | see notes | 0.              | ???       |
| LMEKOOH        | 0.1              | see notes | 0.              | ???       |
| LBUT1ENNO3     | 0.1              | see notes | 0.              | ???       |
| LC4H9NO3       | 0.1              | see notes | 0.              | ???       |
| LMEKNO3        | 0.1              | see notes | 0.              | ???       |
| C1ODC2O2C4OD   | 0.1              | see notes | 0.              | ???       |
| C1ODC2O2C4OOH  | 0.1              | see notes | 0.              | ???       |
| C1ODC2OOHC4OD  | 0.1              | see notes | 0.              | ???       |
| C1ODC3O2C4OOH  | 0.1              | see notes | 0.              | ???       |
| C1OOHC2O2C4OD  | 0.1              | see notes | 0.              | ???       |
| C1OOHC2OOHC4OD | 0.1              | see notes | 0.              | ???       |
| C1OOHC3O2C4OD  | 0.1              | see notes | 0.              | ???       |
| C4MDIAL        | 0.1              | see notes | 0.              | ???       |
| C511O2         | 0.1              | see notes | 0.              | ???       |
| C511OOH        | 0.1              | see notes | 0.              | ???       |
| C512O2         | 0.1              | see notes | 0.              | ???       |
| C512OOH        | 0.1              | see notes | 0.              | ???       |
| C513CO         | 0.1              | see notes | 0.              | ???       |
| C513O2         | 0.1              | see notes | 0.              | ???       |
| C513OOH        | 0.1              | see notes | 0.              | ???       |
| C514O2         | 0.1              | see notes | 0.              | ???       |
| C514OOH        | 0.1              | see notes | 0.              | ???       |
| C59O2          | 0.1              | see notes | 0.              | ???       |
| C59OOH         | 0.1              | see notes | 0.              | ???       |
| C5H8           | 0.1              | see notes | 0.              | ???       |
| CHOC3COCO3     | 0.1              | see notes | 0.              | ???       |
| CHOC3COOOH     | 0.1              | see notes | 0.              | ???       |
| CO13C4CHO      | 0.1              | see notes | 0.              | ???       |
| CO23C4CHO      | 0.1              | see notes | 0.              | ???       |

| KPP name      | $\alpha^{\ominus}$ | Reference | $\alpha$ -T-dep | Reference |
|---------------|--------------------|-----------|-----------------|-----------|
| CO23C4CO3     | 0.1                | see notes | 0.              | ???       |
| CO23C4CO3H    | 0.1                | see notes | 0.              | ???       |
| DB1O          | 0.1                | see notes | 0.              | ???       |
| DB1O2         | 0.1                | see notes | 0.              | ???       |
| DB1OOH        | 0.1                | see notes | 0.              | ???       |
| DB2O2         | 0.1                | see notes | 0.              | ???       |
| DB2OOH        | 0.1                | see notes | 0.              | ???       |
| HCOC5         | 0.1                | see notes | 0.              | ???       |
| ISOPAB        | 0.1                | see notes | 0.              | ???       |
| ISOPA0H       | 0.1                | see notes | 0.              | ???       |
| ISOPBO2       | 0.1                | see notes | 0.              | ???       |
| ISOPBOH       | 0.1                | see notes | 0.              | ???       |
| ISOPBOOH      | 0.1                | see notes | 0.              | ???       |
| ISOPCD        | 0.1                | see notes | 0.              | ???       |
| ISOPDO2       | 0.1                | see notes | 0.              | ???       |
| ISOPDOH       | 0.1                | see notes | 0.              | ???       |
| ISOPDOOH      | 0.1                | see notes | 0.              | ???       |
| MBO           | 0.1                | see notes | 0.              | ???       |
| MBOACO        | 0.1                | see notes | 0.              | ???       |
| MBOCOCO       | 0.1                | see notes | 0.              | ???       |
| ME3FURAN      | 0.1                | see notes | 0.              | ???       |
| ZCO3C23DBCOD  | 0.1                | see notes | 0.              | ???       |
| ZCODC23DBC0OH | 0.1                | see notes | 0.              | ???       |
| ACCOMMECHO    | 0.1                | see notes | 0.              | ???       |
| ACCOMMECO3    | 0.1                | see notes | 0.              | ???       |
| ACCOMMECO3H   | 0.1                | see notes | 0.              | ???       |
| C24O3CCO2H    | 0.1                | see notes | 0.              | ???       |
| C4CO2DBC03    | 0.1                | see notes | 0.              | ???       |
| C4CO2DCO3H    | 0.1                | see notes | 0.              | ???       |
| C5134CO2OH    | 0.1                | see notes | 0.              | ???       |
| C54CO         | 0.1                | see notes | 0.              | ???       |
| C5CO14O2      | 0.1                | see notes | 0.              | ???       |
| C5CO14OH      | 0.1                | see notes | 0.              | ???       |
| C5CO14OOH     | 0.1                | see notes | 0.              | ???       |
| C5DIALCO      | 0.1                | see notes | 0.              | ???       |
| C5DIALO2      | 0.1                | see notes | 0.              | ???       |
| C5DIALOOH     | 0.1                | see notes | 0.              | ???       |
| C5DICARB      | 0.1                | see notes | 0.              | ???       |
| C5DICARBO2    | 0.1                | see notes | 0.              | ???       |
| C5DICAROOH    | 0.1                | see notes | 0.              | ???       |
| MC3ODBCO2H    | 0.1                | see notes | 0.              | ???       |
| MMALANHY      | 0.1                | see notes | 0.              | ???       |
| MMALANHYO2    | 0.1                | see notes | 0.              | ???       |
| MMALNHYOOH    | 0.1                | see notes | 0.              | ???       |
| TLFUO2        | 0.1                | see notes | 0.              | ???       |
| TLFUONE       | 0.1                | see notes | 0.              | ???       |
| TLFUOOH       | 0.1                | see notes | 0.              | ???       |
| C4MCONO3OH    | 0.1                | see notes | 0.              | ???       |
| C514NO3       | 0.1                | see notes | 0.              | ???       |



| KPP name       | $\alpha^\ominus$ | Reference | $\alpha$ -T-dep | Reference |
|----------------|------------------|-----------|-----------------|-----------|
| C5PAN9         | 0.1              | see notes | 0.              | ???       |
| CHOC3COPAN     | 0.1              | see notes | 0.              | ???       |
| DB1NO3         | 0.1              | see notes | 0.              | ???       |
| ISOPBDNO3O2    | 0.1              | see notes | 0.              | ???       |
| ISOPBNO3       | 0.1              | see notes | 0.              | ???       |
| ISOPDNO3       | 0.1              | see notes | 0.              | ???       |
| NC4CHO         | 0.1              | see notes | 0.              | ???       |
| NC4OHCO3       | 0.1              | see notes | 0.              | ???       |
| NC4OHCO3H      | 0.1              | see notes | 0.              | ???       |
| NC4OHCPAN      | 0.1              | see notes | 0.              | ???       |
| NISOP2         | 0.1              | see notes | 0.              | ???       |
| NISOP2OOH      | 0.1              | see notes | 0.              | ???       |
| NMBOBO2        | 0.1              | see notes | 0.              | ???       |
| ZCPANC23DBCOD  | 0.1              | see notes | 0.              | ???       |
| ACCOMEPAN      | 0.1              | see notes | 0.              | ???       |
| C4CO2DBPAN     | 0.1              | see notes | 0.              | ???       |
| C5COO2NO2      | 0.1              | see notes | 0.              | ???       |
| NC4MDCO2H      | 0.1              | see notes | 0.              | ???       |
| NTLFUO2        | 0.1              | see notes | 0.              | ???       |
| NTLFUOOH       | 0.1              | see notes | 0.              | ???       |
| LC578O2        | 0.1              | see notes | 0.              | ???       |
| LC578OOH       | 0.1              | see notes | 0.              | ???       |
| LDISOPACO      | 0.1              | see notes | 0.              | ???       |
| LDISOPACO2     | 0.1              | see notes | 0.              | ???       |
| LHC4ACCHO      | 0.1              | see notes | 0.              | ???       |
| LHC4ACCO2H     | 0.1              | see notes | 0.              | ???       |
| LHC4ACCO3      | 0.1              | see notes | 0.              | ???       |
| LHC4ACCO3H     | 0.1              | see notes | 0.              | ???       |
| LIEPOX         | 0.1              | see notes | 0.              | ???       |
| LISOPACO       | 0.1              | see notes | 0.              | ???       |
| LISOPACO2      | 0.1              | see notes | 0.              | ???       |
| LISOPACOOH     | 0.1              | see notes | 0.              | ???       |
| LISOPEFO       | 0.1              | see notes | 0.              | ???       |
| LISOPEFO2      | 0.1              | see notes | 0.              | ???       |
| LMBOABO2       | 0.1              | see notes | 0.              | ???       |
| LMBOABOOH      | 0.1              | see notes | 0.              | ???       |
| LME3FURANO2    | 0.1              | see notes | 0.              | ???       |
| LZCO3HC23DBCOD | 0.1              | see notes | 0.              | ???       |
| LC5PAN1719     | 0.1              | see notes | 0.              | ???       |
| LISOPACNO3     | 0.1              | see notes | 0.              | ???       |
| LISOPACNO3O2   | 0.1              | see notes | 0.              | ???       |
| LMBOABNO3      | 0.1              | see notes | 0.              | ???       |
| LNISO3         | 0.1              | see notes | 0.              | ???       |
| LNISO2OOH      | 0.1              | see notes | 0.              | ???       |
| LNMBOABO2      | 0.1              | see notes | 0.              | ???       |
| LNMBOABOOH     | 0.1              | see notes | 0.              | ???       |
| C614CO         | 0.1              | see notes | 0.              | ???       |
| C614O2         | 0.1              | see notes | 0.              | ???       |
| C614OOH        | 0.1              | see notes | 0.              | ???       |

| KPP name    | $\alpha^\ominus$ | Reference | $\alpha$ -T-dep | Reference |
|-------------|------------------|-----------|-----------------|-----------|
| CO235C5CHO  | 0.1              | see notes | 0.              | ???       |
| CO235C6O2   | 0.1              | see notes | 0.              | ???       |
| CO235C6OOH  | 0.1              | see notes | 0.              | ???       |
| BENZENE     | 0.1              | see notes | 0.              | ???       |
| BZBIPERO2   | 0.1              | see notes | 0.              | ???       |
| BZBIPEROOH  | 0.1              | see notes | 0.              | ???       |
| BZEMUCCO    | 0.1              | see notes | 0.              | ???       |
| BZEMUCCO2H  | 0.1              | see notes | 0.              | ???       |
| BZEMUCCO3   | 0.1              | see notes | 0.              | ???       |
| BZEMUCCO3H  | 0.1              | see notes | 0.              | ???       |
| BZEMUCO2    | 0.1              | see notes | 0.              | ???       |
| BZEMUCOOH   | 0.1              | see notes | 0.              | ???       |
| BZEPOXMUC   | 0.1              | see notes | 0.              | ???       |
| BZOBIPEROH  | 0.1              | see notes | 0.              | ???       |
| C5CO2DBCO3  | 0.1              | see notes | 0.              | ???       |
| C5CO2DCO3H  | 0.1              | see notes | 0.              | ???       |
| C5CO2OHC O3 | 0.1              | see notes | 0.              | ???       |
| C5COOHCO3H  | 0.1              | see notes | 0.              | ???       |
| C6125CO     | 0.1              | see notes | 0.              | ???       |
| C615CO2O2   | 0.1              | see notes | 0.              | ???       |
| C615CO2OOH  | 0.1              | see notes | 0.              | ???       |
| C6CO4DB     | 0.1              | see notes | 0.              | ???       |
| C6H5O       | 0.1              | see notes | 0.              | ???       |
| C6H5O2      | 0.1              | see notes | 0.              | ???       |
| C6H5OOH     | 0.1              | see notes | 0.              | ???       |
| CATEC1O     | 0.1              | see notes | 0.              | ???       |
| CATEC1O2    | 0.1              | see notes | 0.              | ???       |
| CATEC1OOH   | 0.1              | see notes | 0.              | ???       |
| CATECHOL    | 0.1              | see notes | 0.              | ???       |
| CPDKETENE   | 0.1              | see notes | 0.              | ???       |
| PBZQCO      | 0.1              | see notes | 0.              | ???       |
| PBZQO2      | 0.1              | see notes | 0.              | ???       |
| PBZQONE     | 0.1              | see notes | 0.              | ???       |
| PBZQOOH     | 0.1              | see notes | 0.              | ???       |
| PHENO2      | 0.1              | see notes | 0.              | ???       |
| PHENOL      | 0.1              | see notes | 0.              | ???       |
| PHENOOH     | 0.1              | see notes | 0.              | ???       |
| C614NO3     | 0.1              | see notes | 0.              | ???       |
| BZBIPERNO3  | 0.1              | see notes | 0.              | ???       |
| BZEMUCNO3   | 0.1              | see notes | 0.              | ???       |
| BZEMUCPAN   | 0.1              | see notes | 0.              | ???       |
| C5CO2DBPAN  | 0.1              | see notes | 0.              | ???       |
| C5CO2OHPAN  | 0.1              | see notes | 0.              | ???       |
| DNPHEN      | 0.1              | see notes | 0.              | ???       |
| DNPHENO2    | 0.1              | see notes | 0.              | ???       |
| DNPHENOOH   | 0.1              | see notes | 0.              | ???       |
| HOC6H4NO2   | 0.1              | see notes | 0.              | ???       |
| NBZQO2      | 0.1              | see notes | 0.              | ???       |
| NBZQOOH     | 0.1              | see notes | 0.              | ???       |

| KPP name   | $\alpha^\ominus$ | Reference | $\alpha$ -T-dep | Reference |
|------------|------------------|-----------|-----------------|-----------|
| NCATECHOL  | 0.1              | see notes | 0.              | ???       |
| NCATECO2   | 0.1              | see notes | 0.              | ???       |
| NCATECOOH  | 0.1              | see notes | 0.              | ???       |
| NCPDKETENE | 0.1              | see notes | 0.              | ???       |
| NDNPHENO2  | 0.1              | see notes | 0.              | ???       |
| NDNPHENOOH | 0.1              | see notes | 0.              | ???       |
| NNCATECO2  | 0.1              | see notes | 0.              | ???       |
| NNCATECOOH | 0.1              | see notes | 0.              | ???       |
| NPHEN1O    | 0.1              | see notes | 0.              | ???       |
| NPHEN1O2   | 0.1              | see notes | 0.              | ???       |
| NPHEN1OOH  | 0.1              | see notes | 0.              | ???       |
| NPHENO2    | 0.1              | see notes | 0.              | ???       |
| NPHENOOH   | 0.1              | see notes | 0.              | ???       |
| C235C6CO3H | 0.1              | see notes | 0.              | ???       |
| C716O2     | 0.1              | see notes | 0.              | ???       |
| C716OOH    | 0.1              | see notes | 0.              | ???       |
| C721O2     | 0.1              | see notes | 0.              | ???       |
| C721OOH    | 0.1              | see notes | 0.              | ???       |
| C722O2     | 0.1              | see notes | 0.              | ???       |
| C722OOH    | 0.1              | see notes | 0.              | ???       |
| CO235C6CHO | 0.1              | see notes | 0.              | ???       |
| CO235C6CO3 | 0.1              | see notes | 0.              | ???       |
| MCPDKETENE | 0.1              | see notes | 0.              | ???       |
| ROO6R3O    | 0.1              | see notes | 0.              | ???       |
| ROO6R3O2   | 0.1              | see notes | 0.              | ???       |
| ROO6R5O2   | 0.1              | see notes | 0.              | ???       |
| BENZAL     | 0.1              | see notes | 0.              | ???       |
| C6CO2OHCO3 | 0.1              | see notes | 0.              | ???       |
| C6COOHCO3H | 0.1              | see notes | 0.              | ???       |
| C6H5CH2O2  | 0.1              | see notes | 0.              | ???       |
| C6H5CH2OOH | 0.1              | see notes | 0.              | ???       |
| C6H5CO3    | 0.1              | see notes | 0.              | ???       |
| C6H5CO3H   | 0.1              | see notes | 0.              | ???       |
| C7CO4DB    | 0.1              | see notes | 0.              | ???       |
| CRESO2     | 0.1              | see notes | 0.              | ???       |
| CRESOL     | 0.1              | see notes | 0.              | ???       |
| CRESOOH    | 0.1              | see notes | 0.              | ???       |
| MCATEC1O   | 0.1              | see notes | 0.              | ???       |
| MCATEC1O2  | 0.1              | see notes | 0.              | ???       |
| MCATEC1OOH | 0.1              | see notes | 0.              | ???       |
| MCATECHOL  | 0.1              | see notes | 0.              | ???       |
| OXYL1O2    | 0.1              | see notes | 0.              | ???       |
| OXYL1OOH   | 0.1              | see notes | 0.              | ???       |
| PHCOOH     | 0.1              | see notes | 0.              | ???       |
| PTLQCO     | 0.1              | see notes | 0.              | ???       |
| PTLQO2     | 0.1              | see notes | 0.              | ???       |
| PTLQONE    | 0.1              | see notes | 0.              | ???       |
| PTLQOOH    | 0.1              | see notes | 0.              | ???       |
| TLBIPERO2  | 0.1              | see notes | 0.              | ???       |

| KPP name    | $\alpha^\ominus$ | Reference | $\alpha$ -T-dep | Reference |
|-------------|------------------|-----------|-----------------|-----------|
| TLBIPEROOH  | 0.1              | see notes | 0.              | ???       |
| TLEMUCCO    | 0.1              | see notes | 0.              | ???       |
| TLEMUCCO2H  | 0.1              | see notes | 0.              | ???       |
| TLEMUCCO3   | 0.1              | see notes | 0.              | ???       |
| TLEMUCCO3H  | 0.1              | see notes | 0.              | ???       |
| TLEMUCO2    | 0.1              | see notes | 0.              | ???       |
| TLEMUCOOH   | 0.1              | see notes | 0.              | ???       |
| TLEPOXMUC   | 0.1              | see notes | 0.              | ???       |
| TLOBIPEROH  | 0.1              | see notes | 0.              | ???       |
| TOL1O       | 0.1              | see notes | 0.              | ???       |
| TOLUENE     | 0.1              | see notes | 0.              | ???       |
| C7PAN3      | 0.1              | see notes | 0.              | ???       |
| C6CO2OHPAN  | 0.1              | see notes | 0.              | ???       |
| C6H5CH2NO3  | 0.1              | see notes | 0.              | ???       |
| DNCRES      | 0.1              | see notes | 0.              | ???       |
| DNCRESO2    | 0.1              | see notes | 0.              | ???       |
| DNCRESOOH   | 0.1              | see notes | 0.              | ???       |
| MNCATECH    | 0.1              | see notes | 0.              | ???       |
| MNCATECO2   | 0.1              | see notes | 0.              | ???       |
| MNCATECOOH  | 0.1              | see notes | 0.              | ???       |
| MNCPDKETENE | 0.1              | see notes | 0.              | ???       |
| MNNCATCOOH  | 0.1              | see notes | 0.              | ???       |
| MNNCATECO2  | 0.1              | see notes | 0.              | ???       |
| NCRES1O     | 0.1              | see notes | 0.              | ???       |
| NCRES1O2    | 0.1              | see notes | 0.              | ???       |
| NCRES1OOH   | 0.1              | see notes | 0.              | ???       |
| NCRESO2     | 0.1              | see notes | 0.              | ???       |
| NCRESOOH    | 0.1              | see notes | 0.              | ???       |
| NDNCRESO2   | 0.1              | see notes | 0.              | ???       |
| NDNCRESOOH  | 0.1              | see notes | 0.              | ???       |
| NPTLQO2     | 0.1              | see notes | 0.              | ???       |
| NPTLQOOH    | 0.1              | see notes | 0.              | ???       |
| PBZN        | 0.1              | see notes | 0.              | ???       |
| TLBIPERNO3  | 0.1              | see notes | 0.              | ???       |
| TLEMUCNO3   | 0.1              | see notes | 0.              | ???       |
| TLEMUCPAN   | 0.1              | see notes | 0.              | ???       |
| TOL1OHNO2   | 0.1              | see notes | 0.              | ???       |
| C721CHO     | 0.1              | see notes | 0.              | ???       |
| C721CO3     | 0.1              | see notes | 0.              | ???       |
| C721CO3H    | 0.1              | see notes | 0.              | ???       |
| C810O2      | 0.1              | see notes | 0.              | ???       |
| C810OOH     | 0.1              | see notes | 0.              | ???       |
| C811O2      | 0.1              | see notes | 0.              | ???       |
| C812O2      | 0.1              | see notes | 0.              | ???       |
| C812OOH     | 0.1              | see notes | 0.              | ???       |
| C813O2      | 0.1              | see notes | 0.              | ???       |
| C813OOH     | 0.1              | see notes | 0.              | ???       |
| C85O2       | 0.1              | see notes | 0.              | ???       |
| C85OOH      | 0.1              | see notes | 0.              | ???       |

| KPP name   | $\alpha^{\ominus}$ | Reference | $\alpha$ -T-dep | Reference |
|------------|--------------------|-----------|-----------------|-----------|
| C86O2      | 0.1                | see notes | 0.              | ???       |
| C86OOH     | 0.1                | see notes | 0.              | ???       |
| C89O2      | 0.1                | see notes | 0.              | ???       |
| C89OOH     | 0.1                | see notes | 0.              | ???       |
| C8BC       | 0.1                | see notes | 0.              | ???       |
| C8BCCO     | 0.1                | see notes | 0.              | ???       |
| C8BCO2     | 0.1                | see notes | 0.              | ???       |
| C8BCOOH    | 0.1                | see notes | 0.              | ???       |
| NORPINIC   | 0.1                | see notes | 0.              | ???       |
| EBENZ      | 0.1                | see notes | 0.              | ???       |
| LXYL       | 0.1                | see notes | 0.              | ???       |
| STYRENE    | 0.1                | see notes | 0.              | ???       |
| STYRENO2   | 0.1                | see notes | 0.              | ???       |
| STYRENOOH  | 0.1                | see notes | 0.              | ???       |
| C721PAN    | 0.1                | see notes | 0.              | ???       |
| C810NO3    | 0.1                | see notes | 0.              | ???       |
| C89NO3     | 0.1                | see notes | 0.              | ???       |
| C8BCNO3    | 0.1                | see notes | 0.              | ???       |
| NSTYRENO2  | 0.1                | see notes | 0.              | ???       |
| NSTYRENOOH | 0.1                | see notes | 0.              | ???       |
| C811CO3    | 0.1                | see notes | 0.              | ???       |
| C811CO3H   | 0.1                | see notes | 0.              | ???       |
| C85CO3     | 0.1                | see notes | 0.              | ???       |
| C85CO3H    | 0.1                | see notes | 0.              | ???       |
| C89CO2H    | 0.1                | see notes | 0.              | ???       |
| C89CO3     | 0.1                | see notes | 0.              | ???       |
| C89CO3H    | 0.1                | see notes | 0.              | ???       |
| C96O2      | 0.1                | see notes | 0.              | ???       |
| C96OOH     | 0.1                | see notes | 0.              | ???       |
| C97O2      | 0.1                | see notes | 0.              | ???       |
| C97OOH     | 0.1                | see notes | 0.              | ???       |
| C98O2      | 0.1                | see notes | 0.              | ???       |
| C98OOH     | 0.1                | see notes | 0.              | ???       |
| NOPINDCO   | 0.1                | see notes | 0.              | ???       |
| NOPINDO2   | 0.1                | see notes | 0.              | ???       |
| NOPINDOOH  | 0.1                | see notes | 0.              | ???       |
| NOPINONE   | 0.1                | see notes | 0.              | ???       |
| NOPINOO    | 0.1                | see notes | 0.              | ???       |
| NORPINAL   | 0.1                | see notes | 0.              | ???       |
| NORPINENOL | 0.1                | see notes | 0.              | ???       |
| PINIC      | 0.1                | see notes | 0.              | ???       |
| RO6R3P     | 0.1                | see notes | 0.              | ???       |
| C811PAN    | 0.1                | see notes | 0.              | ???       |
| C89PAN     | 0.1                | see notes | 0.              | ???       |
| C96NO3     | 0.1                | see notes | 0.              | ???       |
| C9PAN2     | 0.1                | see notes | 0.              | ???       |
| LTMB       | 0.1                | see notes | 0.              | ???       |
| APINAOO    | 0.1                | see notes | 0.              | ???       |
| APINBOO    | 0.1                | see notes | 0.              | ???       |

| KPP name        | $\alpha^\ominus$ | Reference | $\alpha$ -T-dep | Reference |
|-----------------|------------------|-----------|-----------------|-----------|
| APINENE         | 0.1              | see notes | 0.              | ???       |
| BPINAO2         | 0.1              | see notes | 0.              | ???       |
| BPINAOOH        | 0.1              | see notes | 0.              | ???       |
| BPINENE         | 0.1              | see notes | 0.              | ???       |
| C106O2          | 0.1              | see notes | 0.              | ???       |
| C106OOH         | 0.1              | see notes | 0.              | ???       |
| C109CO          | 0.1              | see notes | 0.              | ???       |
| C109O2          | 0.1              | see notes | 0.              | ???       |
| C109OOH         | 0.1              | see notes | 0.              | ???       |
| C96CO3          | 0.1              | see notes | 0.              | ???       |
| CAMPHENE        | 0.1              | see notes | 0.              | ???       |
| CARENE          | 0.1              | see notes | 0.              | ???       |
| MENTHEN6ONE     | 0.1              | see notes | 0.              | ???       |
| OH2MENTHEN6ONE  | 0.1              | see notes | 0.              | ???       |
| OHMENTHEN6ONEO2 | 0.1              | see notes | 0.              | ???       |
| PERPINONIC      | 0.1              | see notes | 0.              | ???       |
| PINAL           | 0.1              | see notes | 0.              | ???       |
| PINALO2         | 0.1              | see notes | 0.              | ???       |
| PINALOOH        | 0.1              | see notes | 0.              | ???       |
| PINENOL         | 0.1              | see notes | 0.              | ???       |
| PINONIC         | 0.1              | see notes | 0.              | ???       |
| RO6R1O2         | 0.1              | see notes | 0.              | ???       |
| RO6R3O2         | 0.1              | see notes | 0.              | ???       |
| RO6R3OOH        | 0.1              | see notes | 0.              | ???       |
| ROO6R1O2        | 0.1              | see notes | 0.              | ???       |
| SABINENE        | 0.1              | see notes | 0.              | ???       |
| BPINANO3        | 0.1              | see notes | 0.              | ???       |
| C106NO3         | 0.1              | see notes | 0.              | ???       |
| C10PAN2         | 0.1              | see notes | 0.              | ???       |
| PINALNO3        | 0.1              | see notes | 0.              | ???       |
| RO6R1NO3        | 0.1              | see notes | 0.              | ???       |
| RO6R3NO3        | 0.1              | see notes | 0.              | ???       |
| ROO6R1NO3       | 0.1              | see notes | 0.              | ???       |
| LAPINABNO3      | 0.1              | see notes | 0.              | ???       |
| LAPINABO2       | 0.1              | see notes | 0.              | ???       |
| LAPINABOOH      | 0.1              | see notes | 0.              | ???       |
| LNAPINABO2      | 0.1              | see notes | 0.              | ???       |
| LNAPINABOOH     | 0.1              | see notes | 0.              | ???       |
| LNBPINABO2      | 0.1              | see notes | 0.              | ???       |
| LNBPINABOOH     | 0.1              | see notes | 0.              | ???       |
| LHAROM          | 0.1              | see notes | 0.              | ???       |
| CHF3            | 0.1              | see notes | 0.              | ???       |
| CHF2CF3         | 0.1              | see notes | 0.              | ???       |
| CH3CF3          | 0.1              | see notes | 0.              | ???       |
| CH2F2           | 0.1              | see notes | 0.              | ???       |
| CH3CHF2         | 0.1              | see notes | 0.              | ???       |
| CCl4            | 0.1              | see notes | 0.              | ???       |
| CF2Cl2          | 0.1              | see notes | 0.              | ???       |
| CF2ClCF2Cl      | 0.1              | see notes | 0.              | ???       |

| KPP name                            | $\alpha^{\ominus}$ | Reference                    | $\alpha$ -T-dep | Reference |
|-------------------------------------|--------------------|------------------------------|-----------------|-----------|
| CF <sub>2</sub> ClCFCl <sub>2</sub> | 0.1                | see notes                    | 0.              | ???       |
| CF <sub>3</sub> CF <sub>2</sub> Cl  | 0.1                | see notes                    | 0.              | ???       |
| CFCl <sub>3</sub>                   | 0.1                | see notes                    | 0.              | ???       |
| CH <sub>2</sub> Cl <sub>2</sub>     | 0.1                | see notes                    | 0.              | ???       |
| CH <sub>2</sub> FCF <sub>3</sub>    | 0.1                | see notes                    | 0.              | ???       |
| CH <sub>3</sub> CCl <sub>3</sub>    | 0.1                | see notes                    | 0.              | ???       |
| CH <sub>3</sub> CFCl <sub>2</sub>   | 0.1                | see notes                    | 0.              | ???       |
| CH <sub>3</sub> Cl                  | 0.1                | see notes                    | 0.              | ???       |
| CHCl <sub>3</sub>                   | 0.1                | see notes                    | 0.              | ???       |
| CHF <sub>2</sub> Cl                 | 0.1                | see notes                    | 0.              | ???       |
| Cl                                  | 0.1                | see notes                    | 0.              | ???       |
| Cl <sub>2</sub>                     | 0.038              | Hu et al. (1995)             | 6546.           | ???       |
| Cl <sub>2</sub> O <sub>2</sub>      | 0.1                | see notes                    | 0.              | ???       |
| ClNO <sub>2</sub>                   | 0.1                | see notes                    | 0.              | ???       |
| ClNO <sub>3</sub>                   | 0.108              | Deiber et al. (2004)         | 0.              | ???       |
| ClO                                 | 0.1                | see notes                    | 0.              | ???       |
| HCl                                 | 0.074              | Schweitzer et al. (2000)     | 3072.           | ???       |
| HOCl                                | 0.5                | see notes                    | 0.              | ???       |
| OCIO                                | 0.1                | see notes                    | 0.              | ???       |
| LCHLORINE                           | 0.1                | see notes                    | 0.              | ???       |
| Br                                  | 0.1                | see notes                    | 0.              | ???       |
| Br <sub>2</sub>                     | 0.038              | Hu et al. (1995)             | 6546.           | ???       |
| BrCl                                | 0.038              | see notes                    | 6546.           | ???       |
| BrNO <sub>2</sub>                   | 0.1                | see notes                    | 0.              | ???       |
| BrNO <sub>3</sub>                   | 0.063              | Deiber et al. (2004)         | 0.              | ???       |
| BrO                                 | 0.1                | see notes                    | 0.              | ???       |
| CF <sub>2</sub> ClBr                | 0.1                | see notes                    | 0.              | ???       |
| CF <sub>3</sub> Br                  | 0.1                | see notes                    | 0.              | ???       |
| CH <sub>2</sub> Br <sub>2</sub>     | 0.1                | see notes                    | 0.              | ???       |
| CH <sub>2</sub> ClBr                | 0.1                | see notes                    | 0.              | ???       |
| CH <sub>3</sub> Br                  | 0.1                | see notes                    | 0.              | ???       |
| CHBr <sub>3</sub>                   | 0.1                | see notes                    | 0.              | ???       |
| CHCl <sub>2</sub> Br                | 0.1                | see notes                    | 0.              | ???       |
| CHClBr <sub>2</sub>                 | 0.1                | see notes                    | 0.              | ???       |
| HBr                                 | 0.032              | Schweitzer et al. (2000)     | 3940.           | ???       |
| HOBr                                | 0.5                | Abbatt and Waschewsky (1998) | 0.              | ???       |
| LBROMINE                            | 0.1                | see notes                    | 0.              | ???       |
| C <sub>3</sub> H <sub>7</sub> I     | 0.1                | see notes                    | 0.              | ???       |
| CH <sub>2</sub> ClI                 | 0.1                | see notes                    | 0.              | ???       |
| CH <sub>2</sub> I <sub>2</sub>      | 0.1                | see notes                    | 0.              | ???       |
| CH <sub>3</sub> I                   | 0.1                | see notes                    | 0.              | ???       |
| HI                                  | 0.036              | Schweitzer et al. (2000)     | 4130.           | ???       |
| HIO <sub>3</sub>                    | 0.01               | see notes                    | 0.              | ???       |
| HOI                                 | 0.5                | see notes                    | 0.              | ???       |
| I                                   | 0.1                | see notes                    | 0.              | ???       |
| I <sub>2</sub>                      | 0.01               | see notes                    | 2000.           | ???       |
| I <sub>2</sub> O <sub>2</sub>       | 0.1                | see notes                    | 2000.           | ???       |
| IBr                                 | 0.018              | see notes                    | 2000.           | ???       |
| ICl                                 | 0.018              | Braban et al. (2007)         | 2000.           | ???       |

| KPP name   | $\alpha^{\ominus}$ | Reference              | $\alpha$ -T-dep | Reference |
|------------|--------------------|------------------------|-----------------|-----------|
| INO2       | 0.1                | see notes              | 2000.           | ???       |
| INO3       | 0.1                | see notes              | 2000.           | ???       |
| IO         | 0.5                | see notes              | 2000.           | ???       |
| IPART      | 0.1                | see notes              | 0.              | ???       |
| OIO        | 0.01               | see notes              | 0.              | ???       |
| CH3SO2     | 0.1                | see notes              | 0.              | ???       |
| CH3SO3     | 0.1                | see notes              | 0.              | ???       |
| CH3SO3H    | 0.076              | De Bruyn et al. (1994) | 1762.           | ???       |
| DMS        | 0.1                | see notes              | 0.              | ???       |
| DMSO       | 0.048              | De Bruyn et al. (1994) | 2578.           | ???       |
| H2SO4      | 0.65               | Pöschl et al. (1998)   | 0.              | ???       |
| OCS        | 0.1                | see notes              | 0.              | ???       |
| S          | 0.1                | see notes              | 0.              | ???       |
| SF6        | 0.1                | see notes              | 0.              | ???       |
| SH         | 0.1                | see notes              | 0.              | ???       |
| SO         | 0.1                | see notes              | 0.              | ???       |
| SO2        | 0.11               | DeMore et al. (1997)   | 0.              | ???       |
| SO3        | 0.1                | see notes              | 0.              | ???       |
| LSULFUR    | 0.1                | see notes              | 0.              | ???       |
| Hg         | 0.1                | see notes              | 0.              | ???       |
| HgO        | 0.1                | see notes              | 0.              | ???       |
| HgCl       | 0.1                | see notes              | 0.              | ???       |
| HgCl2      | 0.1                | see notes              | 0.              | ???       |
| HgBr       | 0.1                | see notes              | 0.              | ???       |
| HgBr2      | 0.1                | see notes              | 0.              | ???       |
| ClHgBr     | 0.1                | see notes              | 0.              | ???       |
| BrHgOBr    | 0.1                | see notes              | 0.              | ???       |
| ClHgOBr    | 0.1                | see notes              | 0.              | ???       |
| LTERP      | 0.1                | see notes              | 0.              | ???       |
| LALK4      | 0.1                | see notes              | 0.              | ???       |
| LALK5      | 0.1                | see notes              | 0.              | ???       |
| LARO1      | 0.1                | see notes              | 0.              | ???       |
| LARO2      | 0.1                | see notes              | 0.              | ???       |
| LOLE1      | 0.1                | see notes              | 0.              | ???       |
| LOLE2      | 0.1                | see notes              | 0.              | ???       |
| LfPOG02    | 0.1                | see notes              | 0.              | ???       |
| LfPOG03    | 0.1                | see notes              | 0.              | ???       |
| LfPOG04    | 0.1                | see notes              | 0.              | ???       |
| LfPOG05    | 0.1                | see notes              | 0.              | ???       |
| LbbPOG02   | 0.1                | see notes              | 0.              | ???       |
| LbbPOG03   | 0.1                | see notes              | 0.              | ???       |
| LbbPOG04   | 0.1                | see notes              | 0.              | ???       |
| LfSOGsv01  | 0.1                | see notes              | 0.              | ???       |
| LfSOGsv02  | 0.1                | see notes              | 0.              | ???       |
| LbbSOGsv01 | 0.1                | see notes              | 0.              | ???       |
| LbbSOGsv02 | 0.1                | see notes              | 0.              | ???       |
| LfSOGiv01  | 0.1                | see notes              | 0.              | ???       |
| LfSOGiv02  | 0.1                | see notes              | 0.              | ???       |
| LfSOGiv03  | 0.1                | see notes              | 0.              | ???       |



| KPP name   | $\alpha^\ominus$ | Reference | $\alpha$ -T-dep | Reference |
|------------|------------------|-----------|-----------------|-----------|
| LfSOGiv04  | 0.1              | see notes | 0.              | ???       |
| LbbSOGiv01 | 0.1              | see notes | 0.              | ???       |
| LbbSOGiv02 | 0.1              | see notes | 0.              | ???       |
| LbbSOGiv03 | 0.1              | see notes | 0.              | ???       |
| LbSOGv01   | 0.1              | see notes | 0.              | ???       |
| LbSOGv02   | 0.1              | see notes | 0.              | ???       |
| LbSOGv03   | 0.1              | see notes | 0.              | ???       |
| LbSOGv04   | 0.1              | see notes | 0.              | ???       |
| LbOSOGv01  | 0.1              | see notes | 0.              | ???       |
| LbOSOGv02  | 0.1              | see notes | 0.              | ???       |
| LbOSOGv03  | 0.1              | see notes | 0.              | ???       |
| LaSOGv01   | 0.1              | see notes | 0.              | ???       |
| LaSOGv02   | 0.1              | see notes | 0.              | ???       |
| LaSOGv03   | 0.1              | see notes | 0.              | ???       |
| LaSOGv04   | 0.1              | see notes | 0.              | ???       |
| LaOSOGv01  | 0.1              | see notes | 0.              | ???       |
| LaOSOGv02  | 0.1              | see notes | 0.              | ???       |
| LaOSOGv03  | 0.1              | see notes | 0.              | ???       |
| ISO2       | 0.1              | see notes | 0.              | ???       |
| ISON       | 0.1              | see notes | 0.              | ???       |
| ISOOH      | 0.1              | see notes | 0.              | ???       |
| LHOC3H6O2  | 0.1              | see notes | 0.              | ???       |
| LHOC3H6OOH | 0.1              | see notes | 0.              | ???       |
| MVKO2      | 0.1              | see notes | 0.              | ???       |
| MVKOOH     | 0.1              | see notes | 0.              | ???       |
| NACA       | 0.1              | see notes | 0.              | ???       |
| ONE        | 0.1              | see notes | 0.              | ???       |
| O          | 0.1              | see notes | 0.              | ???       |
| C          | 0.1              | see notes | 0.              | ???       |
| OXL        | 0.1              | see notes | 0.              | ???       |

| KPP name  | $K_a$    | Reference                  | $K_{a2}$ | Reference |
|-----------|----------|----------------------------|----------|-----------|
| O1D       | 9.99999  | ???                        | 9.99999  | ???       |
| O3P       | 9.99999  | ???                        | 9.99999  | ???       |
| O2        | 9.99999  | ???                        | 9.99999  | ???       |
| O3        | 9.99999  | ???                        | 9.99999  | ???       |
| H         | 9.99999  | ???                        | 9.99999  | ???       |
| H2        | 9.99999  | ???                        | 9.99999  | ???       |
| OH        | 9.99999  | ???                        | 9.99999  | ???       |
| HO2       | 3.5E-5   | Pandis and Seinfeld (1989) | 9.99999  | ???       |
| H2O       | 9.99999  | ???                        | 9.99999  | ???       |
| H2O2      | 9.99999  | ???                        | 9.99999  | ???       |
| H2OH2O    | 9.99999  | ???                        | 9.99999  | ???       |
| N         | 9.99999  | ???                        | 9.99999  | ???       |
| N2D       | 9.99999  | ???                        | 9.99999  | ???       |
| N2        | 9.99999  | ???                        | 9.99999  | ???       |
| NH3       | -1.75E-5 | Pandis and Seinfeld (1989) | 9.99999  | ???       |
| N2O       | 9.99999  | ???                        | 9.99999  | ???       |
| NO        | 9.99999  | ???                        | 9.99999  | ???       |
| NO2       | 9.99999  | ???                        | 9.99999  | ???       |
| NO3       | 9.99999  | ???                        | 9.99999  | ???       |
| N2O5      | 9.99999  | ???                        | 9.99999  | ???       |
| HONO      | 5.1E-4   | Pandis and Seinfeld (1989) | 9.99999  | ???       |
| HNO3      | 15.4     | Pandis and Seinfeld (1989) | 9.99999  | ???       |
| HNO4      | 9.99999  | ???                        | 9.99999  | ???       |
| NH2       | 9.99999  | ???                        | 9.99999  | ???       |
| HNO       | 9.99999  | ???                        | 9.99999  | ???       |
| NHOH      | 9.99999  | ???                        | 9.99999  | ???       |
| NH2O      | 9.99999  | ???                        | 9.99999  | ???       |
| NH2OH     | 9.99999  | ???                        | 9.99999  | ???       |
| LNITROGEN | 9.99999  | ???                        | 9.99999  | ???       |
| CH2OO     | 9.99999  | ???                        | 9.99999  | ???       |
| CH2OOA    | 9.99999  | ???                        | 9.99999  | ???       |
| CH3       | 9.99999  | ???                        | 9.99999  | ???       |
| CH3O      | 9.99999  | ???                        | 9.99999  | ???       |
| CH3O2     | 9.99999  | ???                        | 9.99999  | ???       |
| CH3OH     | 9.99999  | ???                        | 9.99999  | ???       |
| CH3OOH    | 9.99999  | ???                        | 9.99999  | ???       |
| CH4       | 9.99999  | ???                        | 9.99999  | ???       |
| CO        | 9.99999  | ???                        | 9.99999  | ???       |
| CO2       | 9.99999  | ???                        | 9.99999  | ???       |
| HCHO      | 9.99999  | ???                        | 9.99999  | ???       |
| HCOOH     | 1.78E-4  | Pandis and Seinfeld (1989) | 9.99999  | ???       |
| HOCH2O2   | 9.99999  | ???                        | 9.99999  | ???       |
| HOCH2OH   | 9.99999  | ???                        | 9.99999  | ???       |
| HOCH2OOH  | 9.99999  | ???                        | 9.99999  | ???       |
| CH3NO3    | 9.99999  | ???                        | 9.99999  | ???       |
| CH3O2NO2  | 9.99999  | ???                        | 9.99999  | ???       |
| CH3ONO    | 9.99999  | ???                        | 9.99999  | ???       |
| CN        | 9.99999  | ???                        | 9.99999  | ???       |
| HCN       | 9.99999  | ???                        | 9.99999  | ???       |

| KPP name   | $K_a$   | Reference   | $K_{a2}$ | Reference |
|------------|---------|-------------|----------|-----------|
| HOCH2O2NO2 | 9.99999 | ???         | 9.99999  | ???       |
| NCO        | 9.99999 | ???         | 9.99999  | ???       |
| LCARBON    | 9.99999 | ???         | 9.99999  | ???       |
| C2H2       | 9.99999 | ???         | 9.99999  | ???       |
| C2H4       | 9.99999 | ???         | 9.99999  | ???       |
| C2H5O2     | 9.99999 | ???         | 9.99999  | ???       |
| C2H5OH     | 9.99999 | ???         | 9.99999  | ???       |
| C2H5OOH    | 9.99999 | ???         | 9.99999  | ???       |
| C2H6       | 9.99999 | ???         | 9.99999  | ???       |
| CH2CHOH    | 9.99999 | ???         | 9.99999  | ???       |
| CH2CO      | 9.99999 | ???         | 9.99999  | ???       |
| CH3CHO     | 9.99999 | ???         | 9.99999  | ???       |
| CH3CHOHO2  | 9.99999 | ???         | 9.99999  | ???       |
| CH3CHOHOOH | 9.99999 | ???         | 9.99999  | ???       |
| CH3CO      | 9.99999 | ???         | 9.99999  | ???       |
| CH3CO2H    | 1.75E-5 | Lide (2008) | 9.99999  | ???       |
| CH3CO3     | 9.99999 | ???         | 9.99999  | ???       |
| CH3CO3H    | 9.99999 | ???         | 9.99999  | ???       |
| ETHGLY     | 9.99999 | ???         | 9.99999  | ???       |
| GLYOX      | 9.99999 | ???         | 9.99999  | ???       |
| HCOCH2O2   | 9.99999 | ???         | 9.99999  | ???       |
| HCOCO      | 9.99999 | ???         | 9.99999  | ???       |
| HCOCO2H    | 6.61E-4 | Lide (2008) | 9.99999  | ???       |
| HCOCO3     | 9.99999 | ???         | 9.99999  | ???       |
| HCOCO3H    | 9.99999 | ???         | 9.99999  | ???       |
| HOCH2CH2O  | 9.99999 | ???         | 9.99999  | ???       |
| HOCH2CH2O2 | 9.99999 | ???         | 9.99999  | ???       |
| HOCH2CHO   | 9.99999 | ???         | 9.99999  | ???       |
| HOCH2CO    | 9.99999 | ???         | 9.99999  | ???       |
| HOCH2CO2H  | 1.48E-4 | Lide (2008) | 9.99999  | ???       |
| HOCH2CO3   | 9.99999 | ???         | 9.99999  | ???       |
| HOCH2CO3H  | 9.99999 | ???         | 9.99999  | ???       |
| HOCHCHO    | 9.99999 | ???         | 9.99999  | ???       |
| HOCH2CHO   | 9.99999 | ???         | 9.99999  | ???       |
| HOCH2CO2H  | 9.99999 | ???         | 9.99999  | ???       |
| HOCH2CO3   | 9.99999 | ???         | 9.99999  | ???       |
| HOCH2CO3H  | 9.99999 | ???         | 9.99999  | ???       |
| HYETHO2H   | 9.99999 | ???         | 9.99999  | ???       |
| C2H5NO3    | 9.99999 | ???         | 9.99999  | ???       |
| C2H5O2NO2  | 9.99999 | ???         | 9.99999  | ???       |
| CH3CN      | 9.99999 | ???         | 9.99999  | ???       |
| ETHOHNO3   | 9.99999 | ???         | 9.99999  | ???       |
| NCCH2O2    | 9.99999 | ???         | 9.99999  | ???       |
| NO3CH2CHO  | 9.99999 | ???         | 9.99999  | ???       |
| NO3CH2CO3  | 9.99999 | ???         | 9.99999  | ???       |
| NO3CH2PAN  | 9.99999 | ???         | 9.99999  | ???       |
| PAN        | 9.99999 | ???         | 9.99999  | ???       |
| PHAN       | 9.99999 | ???         | 9.99999  | ???       |
| ACETOL     | 9.99999 | ???         | 9.99999  | ???       |

| KPP name      | $K_a$   | Reference   | $K_{a2}$ | Reference |
|---------------|---------|-------------|----------|-----------|
| ALCOCH2OOH    | 9.99999 | ???         | 9.99999  | ???       |
| C2H5CHO       | 9.99999 | ???         | 9.99999  | ???       |
| C2H5CO2H      | 1.35E-5 | Lide (2008) | 9.99999  | ???       |
| C2H5CO3       | 9.99999 | ???         | 9.99999  | ???       |
| C2H5CO3H      | 9.99999 | ???         | 9.99999  | ???       |
| C33CO         | 9.99999 | ???         | 9.99999  | ???       |
| C3H6          | 9.99999 | ???         | 9.99999  | ???       |
| C3H8          | 9.99999 | ???         | 9.99999  | ???       |
| CH3CHCO       | 9.99999 | ???         | 9.99999  | ???       |
| CH3COCH2O2    | 9.99999 | ???         | 9.99999  | ???       |
| CH3COCH3      | 9.99999 | ???         | 9.99999  | ???       |
| CH3COCO2H     | 4.07E-3 | Lide (2008) | 9.99999  | ???       |
| CH3COCO3      | 9.99999 | ???         | 9.99999  | ???       |
| CH3COCO3H     | 9.99999 | ???         | 9.99999  | ???       |
| CHOCOCH2O2    | 9.99999 | ???         | 9.99999  | ???       |
| HCOCH2CHO     | 9.99999 | ???         | 9.99999  | ???       |
| HCOCH2CO2H    | 9.99999 | ???         | 9.99999  | ???       |
| HCOCH2CO3     | 9.99999 | ???         | 9.99999  | ???       |
| HCOCH2CO3H    | 9.99999 | ???         | 9.99999  | ???       |
| HCOCOCH2OOH   | 9.99999 | ???         | 9.99999  | ???       |
| HOC2H4CO2H    | 9.99999 | ???         | 9.99999  | ???       |
| HOC2H4CO3     | 9.99999 | ???         | 9.99999  | ???       |
| HOC2H4CO3H    | 9.99999 | ???         | 9.99999  | ???       |
| HOCH2COCH2O2  | 9.99999 | ???         | 9.99999  | ???       |
| HOCH2COCH2OOH | 9.99999 | ???         | 9.99999  | ???       |
| HOCH2COCHO    | 9.99999 | ???         | 9.99999  | ???       |
| HYPERACET     | 9.99999 | ???         | 9.99999  | ???       |
| HYPROPO2      | 9.99999 | ???         | 9.99999  | ???       |
| HYPROPO2H     | 9.99999 | ???         | 9.99999  | ???       |
| IC3H7O2       | 9.99999 | ???         | 9.99999  | ???       |
| IC3H7OOH      | 9.99999 | ???         | 9.99999  | ???       |
| IPROPOL       | 9.99999 | ???         | 9.99999  | ???       |
| MGLYOX        | 9.99999 | ???         | 9.99999  | ???       |
| NC3H7O2       | 9.99999 | ???         | 9.99999  | ???       |
| NC3H7OOH      | 9.99999 | ???         | 9.99999  | ???       |
| NPROPOL       | 9.99999 | ???         | 9.99999  | ???       |
| PROPENOL      | 9.99999 | ???         | 9.99999  | ???       |
| C32OH13CO     | 9.99999 | ???         | 9.99999  | ???       |
| C3DIALO2      | 9.99999 | ???         | 9.99999  | ???       |
| C3DIALOOH     | 9.99999 | ???         | 9.99999  | ???       |
| HCOCOHCOC3    | 9.99999 | ???         | 9.99999  | ???       |
| HCOCOHCOC3H   | 9.99999 | ???         | 9.99999  | ???       |
| METACETHO     | 9.99999 | ???         | 9.99999  | ???       |
| C3PAN1        | 9.99999 | ???         | 9.99999  | ???       |
| C3PAN2        | 9.99999 | ???         | 9.99999  | ???       |
| CH3COCH2O2NO2 | 9.99999 | ???         | 9.99999  | ???       |
| IC3H7NO3      | 9.99999 | ???         | 9.99999  | ???       |
| NC3H7NO3      | 9.99999 | ???         | 9.99999  | ???       |
| NOA           | 9.99999 | ???         | 9.99999  | ???       |

| KPP name      | $K_a$   | Reference | $K_{a2}$ | Reference |
|---------------|---------|-----------|----------|-----------|
| PPN           | 9.99999 | ???       | 9.99999  | ???       |
| PR2O2HNO3     | 9.99999 | ???       | 9.99999  | ???       |
| PRONO3BO2     | 9.99999 | ???       | 9.99999  | ???       |
| PROPOLNO3     | 9.99999 | ???       | 9.99999  | ???       |
| HCOCOHPAN     | 9.99999 | ???       | 9.99999  | ???       |
| BIACET        | 9.99999 | ???       | 9.99999  | ???       |
| BIACETO2      | 9.99999 | ???       | 9.99999  | ???       |
| BIACETOH      | 9.99999 | ???       | 9.99999  | ???       |
| BIACETOOH     | 9.99999 | ???       | 9.99999  | ???       |
| BUT1ENE       | 9.99999 | ???       | 9.99999  | ???       |
| BUT2OLO       | 9.99999 | ???       | 9.99999  | ???       |
| BUT2OLO2      | 9.99999 | ???       | 9.99999  | ???       |
| BUT2OLOOH     | 9.99999 | ???       | 9.99999  | ???       |
| BUTENOL       | 9.99999 | ???       | 9.99999  | ???       |
| C312COCO3     | 9.99999 | ???       | 9.99999  | ???       |
| C312COCO3H    | 9.99999 | ???       | 9.99999  | ???       |
| C3H7CHO       | 9.99999 | ???       | 9.99999  | ???       |
| C413COOOH     | 9.99999 | ???       | 9.99999  | ???       |
| C44O2         | 9.99999 | ???       | 9.99999  | ???       |
| C44OOH        | 9.99999 | ???       | 9.99999  | ???       |
| C4CODIAL      | 9.99999 | ???       | 9.99999  | ???       |
| CBUT2ENE      | 9.99999 | ???       | 9.99999  | ???       |
| CH3COCHCO     | 9.99999 | ???       | 9.99999  | ???       |
| CH3COCHO2CHO  | 9.99999 | ???       | 9.99999  | ???       |
| CH3COCOCO2H   | 9.99999 | ???       | 9.99999  | ???       |
| CH3COOHCHCHO  | 9.99999 | ???       | 9.99999  | ???       |
| CHOC3COO2     | 9.99999 | ???       | 9.99999  | ???       |
| CO23C3CHO     | 9.99999 | ???       | 9.99999  | ???       |
| CO2C3CHO      | 9.99999 | ???       | 9.99999  | ???       |
| CO2H3CHO      | 9.99999 | ???       | 9.99999  | ???       |
| CO2H3CO2H     | 9.99999 | ???       | 9.99999  | ???       |
| CO2H3CO3      | 9.99999 | ???       | 9.99999  | ???       |
| CO2H3CO3H     | 9.99999 | ???       | 9.99999  | ???       |
| EZCH3CO2CHCHO | 9.99999 | ???       | 9.99999  | ???       |
| EZCHOCCH3CHO2 | 9.99999 | ???       | 9.99999  | ???       |
| HCOCCH3CHOOH  | 9.99999 | ???       | 9.99999  | ???       |
| HCOCCH3CO     | 9.99999 | ???       | 9.99999  | ???       |
| HCOCO2CH3CHO  | 9.99999 | ???       | 9.99999  | ???       |
| HMAC          | 9.99999 | ???       | 9.99999  | ???       |
| HO12CO3C4     | 9.99999 | ???       | 9.99999  | ???       |
| HVMK          | 9.99999 | ???       | 9.99999  | ???       |
| IBUTALOH      | 9.99999 | ???       | 9.99999  | ???       |
| IBUTDIAL      | 9.99999 | ???       | 9.99999  | ???       |
| IBUTOLBO2     | 9.99999 | ???       | 9.99999  | ???       |
| IBUTOLBOOH    | 9.99999 | ???       | 9.99999  | ???       |
| IC4H10        | 9.99999 | ???       | 9.99999  | ???       |
| IC4H9O2       | 9.99999 | ???       | 9.99999  | ???       |
| IC4H9OOH      | 9.99999 | ???       | 9.99999  | ???       |
| IPRCHO        | 9.99999 | ???       | 9.99999  | ???       |

| KPP name   | $K_a$   | Reference          | $K_{a2}$ | Reference |
|------------|---------|--------------------|----------|-----------|
| IPRCO3     | 9.99999 | ???                | 9.99999  | ???       |
| IPRHOCO2H  | 9.99999 | ???                | 9.99999  | ???       |
| IPRHOCO3   | 9.99999 | ???                | 9.99999  | ???       |
| IPRHOCO3H  | 9.99999 | ???                | 9.99999  | ???       |
| MACO2      | 9.99999 | ???                | 9.99999  | ???       |
| MACO2H     | 2.24E-5 | Dong et al. (2008) | 9.99999  | ???       |
| MACO3      | 9.99999 | ???                | 9.99999  | ???       |
| MACO3H     | 9.99999 | ???                | 9.99999  | ???       |
| MACR       | 9.99999 | ???                | 9.99999  | ???       |
| MACRO      | 9.99999 | ???                | 9.99999  | ???       |
| MACRO2     | 9.99999 | ???                | 9.99999  | ???       |
| MACROH     | 9.99999 | ???                | 9.99999  | ???       |
| MACROOH    | 9.99999 | ???                | 9.99999  | ???       |
| MBOOO      | 9.99999 | ???                | 9.99999  | ???       |
| MEK        | 9.99999 | ???                | 9.99999  | ???       |
| MEPROPENE  | 9.99999 | ???                | 9.99999  | ???       |
| MPROPENOL  | 9.99999 | ???                | 9.99999  | ???       |
| MVK        | 9.99999 | ???                | 9.99999  | ???       |
| NC4H10     | 9.99999 | ???                | 9.99999  | ???       |
| PERIBUACID | 9.99999 | ???                | 9.99999  | ???       |
| TBUT2ENE   | 9.99999 | ???                | 9.99999  | ???       |
| TC4H9O2    | 9.99999 | ???                | 9.99999  | ???       |
| TC4H9OOH   | 9.99999 | ???                | 9.99999  | ???       |
| BZFUCO     | 9.99999 | ???                | 9.99999  | ???       |
| BZFUO2     | 9.99999 | ???                | 9.99999  | ???       |
| BZFUONE    | 9.99999 | ???                | 9.99999  | ???       |
| BZFUOOH    | 9.99999 | ???                | 9.99999  | ???       |
| CO14O3CHO  | 9.99999 | ???                | 9.99999  | ???       |
| CO14O3CO2H | 9.99999 | ???                | 9.99999  | ???       |
| CO2C4DIAL  | 9.99999 | ???                | 9.99999  | ???       |
| EPXC4DIAL  | 9.99999 | ???                | 9.99999  | ???       |
| EPXDLCO2H  | 9.99999 | ???                | 9.99999  | ???       |
| EPXDLCO3   | 9.99999 | ???                | 9.99999  | ???       |
| EPXDLCO3H  | 9.99999 | ???                | 9.99999  | ???       |
| HOCOC4DIAL | 9.99999 | ???                | 9.99999  | ???       |
| MALANHY    | 9.99999 | ???                | 9.99999  | ???       |
| MALANHYO2  | 9.99999 | ???                | 9.99999  | ???       |
| MALANHYOOH | 9.99999 | ???                | 9.99999  | ???       |
| MALDALCO2H | 9.99999 | ???                | 9.99999  | ???       |
| MALDALCO3H | 9.99999 | ???                | 9.99999  | ???       |
| MALDIAL    | 9.99999 | ???                | 9.99999  | ???       |
| MALDIALCO3 | 9.99999 | ???                | 9.99999  | ???       |
| MALDIALO2  | 9.99999 | ???                | 9.99999  | ???       |
| MALDIALOOH | 9.99999 | ???                | 9.99999  | ???       |
| MALNHYOHCO | 9.99999 | ???                | 9.99999  | ???       |
| MECOACEOOH | 9.99999 | ???                | 9.99999  | ???       |
| MECOACETO2 | 9.99999 | ???                | 9.99999  | ???       |
| BUT2OLNO3  | 9.99999 | ???                | 9.99999  | ???       |
| C312COPAN  | 9.99999 | ???                | 9.99999  | ???       |

| KPP name       | $K_a$   | Reference | $K_{a2}$ | Reference |
|----------------|---------|-----------|----------|-----------|
| C4PAN5         | 9.99999 | ???       | 9.99999  | ???       |
| IBUTOLBNO3     | 9.99999 | ???       | 9.99999  | ???       |
| IC4H9NO3       | 9.99999 | ???       | 9.99999  | ???       |
| MACRN          | 9.99999 | ???       | 9.99999  | ???       |
| MPAN           | 9.99999 | ???       | 9.99999  | ???       |
| MVKNO3         | 9.99999 | ???       | 9.99999  | ???       |
| PIPN           | 9.99999 | ???       | 9.99999  | ???       |
| TC4H9NO3       | 9.99999 | ???       | 9.99999  | ???       |
| EPXDLPAN       | 9.99999 | ???       | 9.99999  | ???       |
| MALDIALPAN     | 9.99999 | ???       | 9.99999  | ???       |
| NBZFUO2        | 9.99999 | ???       | 9.99999  | ???       |
| NBZFUONE       | 9.99999 | ???       | 9.99999  | ???       |
| NBZFUOOH       | 9.99999 | ???       | 9.99999  | ???       |
| NC4DCO2H       | 9.99999 | ???       | 9.99999  | ???       |
| LBUT1ENO2      | 9.99999 | ???       | 9.99999  | ???       |
| LBUT1ENOOH     | 9.99999 | ???       | 9.99999  | ???       |
| LC4H9O2        | 9.99999 | ???       | 9.99999  | ???       |
| LC4H9OOH       | 9.99999 | ???       | 9.99999  | ???       |
| LHMKVABO2      | 9.99999 | ???       | 9.99999  | ???       |
| LHMKVABOOH     | 9.99999 | ???       | 9.99999  | ???       |
| LMEKO2         | 9.99999 | ???       | 9.99999  | ???       |
| LMEKOOH        | 9.99999 | ???       | 9.99999  | ???       |
| LBUT1ENNO3     | 9.99999 | ???       | 9.99999  | ???       |
| LC4H9NO3       | 9.99999 | ???       | 9.99999  | ???       |
| LMEKNO3        | 9.99999 | ???       | 9.99999  | ???       |
| C1ODC2O2C4OD   | 9.99999 | ???       | 9.99999  | ???       |
| C1ODC2O2C4OOH  | 9.99999 | ???       | 9.99999  | ???       |
| C1ODC2OOHC4OD  | 9.99999 | ???       | 9.99999  | ???       |
| C1ODC3O2C4OOH  | 9.99999 | ???       | 9.99999  | ???       |
| C1OOHC2O2C4OD  | 9.99999 | ???       | 9.99999  | ???       |
| C1OOHC2OOHC4OD | 9.99999 | ???       | 9.99999  | ???       |
| C1OOHC3O2C4OD  | 9.99999 | ???       | 9.99999  | ???       |
| C4MDIAL        | 9.99999 | ???       | 9.99999  | ???       |
| C511O2         | 9.99999 | ???       | 9.99999  | ???       |
| C511OOH        | 9.99999 | ???       | 9.99999  | ???       |
| C512O2         | 9.99999 | ???       | 9.99999  | ???       |
| C512OOH        | 9.99999 | ???       | 9.99999  | ???       |
| C513CO         | 9.99999 | ???       | 9.99999  | ???       |
| C513O2         | 9.99999 | ???       | 9.99999  | ???       |
| C513OOH        | 9.99999 | ???       | 9.99999  | ???       |
| C514O2         | 9.99999 | ???       | 9.99999  | ???       |
| C514OOH        | 9.99999 | ???       | 9.99999  | ???       |
| C59O2          | 9.99999 | ???       | 9.99999  | ???       |
| C59OOH         | 9.99999 | ???       | 9.99999  | ???       |
| C5H8           | 9.99999 | ???       | 9.99999  | ???       |
| CHOC3COCO3     | 9.99999 | ???       | 9.99999  | ???       |
| CHOC3COOOH     | 9.99999 | ???       | 9.99999  | ???       |
| CO13C4CHO      | 9.99999 | ???       | 9.99999  | ???       |
| CO23C4CHO      | 9.99999 | ???       | 9.99999  | ???       |

| KPP name      | $K_a$   | Reference | $K_{a2}$ | Reference |
|---------------|---------|-----------|----------|-----------|
| CO23C4CO3     | 9.99999 | ???       | 9.99999  | ???       |
| CO23C4CO3H    | 9.99999 | ???       | 9.99999  | ???       |
| DB1O          | 9.99999 | ???       | 9.99999  | ???       |
| DB1O2         | 9.99999 | ???       | 9.99999  | ???       |
| DB1OOH        | 9.99999 | ???       | 9.99999  | ???       |
| DB2O2         | 9.99999 | ???       | 9.99999  | ???       |
| DB2OOH        | 9.99999 | ???       | 9.99999  | ???       |
| HCOC5         | 9.99999 | ???       | 9.99999  | ???       |
| ISOPAB        | 9.99999 | ???       | 9.99999  | ???       |
| ISOPAHOH      | 9.99999 | ???       | 9.99999  | ???       |
| ISOPBO2       | 9.99999 | ???       | 9.99999  | ???       |
| ISOPBOH       | 9.99999 | ???       | 9.99999  | ???       |
| ISOPBOOH      | 9.99999 | ???       | 9.99999  | ???       |
| ISOPCD        | 9.99999 | ???       | 9.99999  | ???       |
| ISOPDO2       | 9.99999 | ???       | 9.99999  | ???       |
| ISOPDOH       | 9.99999 | ???       | 9.99999  | ???       |
| ISOPDOOH      | 9.99999 | ???       | 9.99999  | ???       |
| MBO           | 9.99999 | ???       | 9.99999  | ???       |
| MBOACO        | 9.99999 | ???       | 9.99999  | ???       |
| MBOCOCO       | 9.99999 | ???       | 9.99999  | ???       |
| ME3FURAN      | 9.99999 | ???       | 9.99999  | ???       |
| ZCO3C23DBCOD  | 9.99999 | ???       | 9.99999  | ???       |
| ZCODC23DBC00H | 9.99999 | ???       | 9.99999  | ???       |
| ACCOMMECHO    | 9.99999 | ???       | 9.99999  | ???       |
| ACCOMMECO3    | 9.99999 | ???       | 9.99999  | ???       |
| ACCOMMECO3H   | 9.99999 | ???       | 9.99999  | ???       |
| C24O3CCO2H    | 9.99999 | ???       | 9.99999  | ???       |
| C4CO2DBC03    | 9.99999 | ???       | 9.99999  | ???       |
| C4CO2DCO3H    | 9.99999 | ???       | 9.99999  | ???       |
| C5134CO2OH    | 9.99999 | ???       | 9.99999  | ???       |
| C54CO         | 9.99999 | ???       | 9.99999  | ???       |
| C5CO14O2      | 9.99999 | ???       | 9.99999  | ???       |
| C5CO14OH      | 9.99999 | ???       | 9.99999  | ???       |
| C5CO14OOH     | 9.99999 | ???       | 9.99999  | ???       |
| C5DIALCO      | 9.99999 | ???       | 9.99999  | ???       |
| C5DIALO2      | 9.99999 | ???       | 9.99999  | ???       |
| C5DIALOOH     | 9.99999 | ???       | 9.99999  | ???       |
| C5DICARB      | 9.99999 | ???       | 9.99999  | ???       |
| C5DICARBO2    | 9.99999 | ???       | 9.99999  | ???       |
| C5DICAROOH    | 9.99999 | ???       | 9.99999  | ???       |
| MC3ODBCO2H    | 9.99999 | ???       | 9.99999  | ???       |
| MMALANHY      | 9.99999 | ???       | 9.99999  | ???       |
| MMALANHYO2    | 9.99999 | ???       | 9.99999  | ???       |
| MMALNHYOOH    | 9.99999 | ???       | 9.99999  | ???       |
| TLFUO2        | 9.99999 | ???       | 9.99999  | ???       |
| TLFUONE       | 9.99999 | ???       | 9.99999  | ???       |
| TLFUOOH       | 9.99999 | ???       | 9.99999  | ???       |
| C4MCONO3OH    | 9.99999 | ???       | 9.99999  | ???       |
| C514NO3       | 9.99999 | ???       | 9.99999  | ???       |



| KPP name       | $K_a$   | Reference | $K_{a2}$ | Reference |
|----------------|---------|-----------|----------|-----------|
| C5PAN9         | 9.99999 | ???       | 9.99999  | ???       |
| CHOC3COPAN     | 9.99999 | ???       | 9.99999  | ???       |
| DB1NO3         | 9.99999 | ???       | 9.99999  | ???       |
| ISOPBDNO3O2    | 9.99999 | ???       | 9.99999  | ???       |
| ISOPBNO3       | 9.99999 | ???       | 9.99999  | ???       |
| ISOPDNO3       | 9.99999 | ???       | 9.99999  | ???       |
| NC4CHO         | 9.99999 | ???       | 9.99999  | ???       |
| NC4OHCO3       | 9.99999 | ???       | 9.99999  | ???       |
| NC4OHCO3H      | 9.99999 | ???       | 9.99999  | ???       |
| NC4OHCPAN      | 9.99999 | ???       | 9.99999  | ???       |
| NISOP02        | 9.99999 | ???       | 9.99999  | ???       |
| NISOP0OH       | 9.99999 | ???       | 9.99999  | ???       |
| NMBOBCO        | 9.99999 | ???       | 9.99999  | ???       |
| ZCPANC23DBCOD  | 9.99999 | ???       | 9.99999  | ???       |
| ACCOMEPAN      | 9.99999 | ???       | 9.99999  | ???       |
| C4CO2DBPAN     | 9.99999 | ???       | 9.99999  | ???       |
| C5COO2NO2      | 9.99999 | ???       | 9.99999  | ???       |
| NC4MDCO2H      | 9.99999 | ???       | 9.99999  | ???       |
| NTLFUO2        | 9.99999 | ???       | 9.99999  | ???       |
| NTLFUOOH       | 9.99999 | ???       | 9.99999  | ???       |
| LC578O2        | 9.99999 | ???       | 9.99999  | ???       |
| LC578OOH       | 9.99999 | ???       | 9.99999  | ???       |
| LDISOPACO      | 9.99999 | ???       | 9.99999  | ???       |
| LDISOPACO2     | 9.99999 | ???       | 9.99999  | ???       |
| LHC4ACCHO      | 9.99999 | ???       | 9.99999  | ???       |
| LHC4ACCO2H     | 9.99999 | ???       | 9.99999  | ???       |
| LHC4ACCO3      | 9.99999 | ???       | 9.99999  | ???       |
| LHC4ACCO3H     | 9.99999 | ???       | 9.99999  | ???       |
| LIEPOX         | 9.99999 | ???       | 9.99999  | ???       |
| LISOPACO       | 9.99999 | ???       | 9.99999  | ???       |
| LISOPACO2      | 9.99999 | ???       | 9.99999  | ???       |
| LISOPACOOH     | 9.99999 | ???       | 9.99999  | ???       |
| LISOPEFO       | 9.99999 | ???       | 9.99999  | ???       |
| LISOPEFO2      | 9.99999 | ???       | 9.99999  | ???       |
| LMBOABO2       | 9.99999 | ???       | 9.99999  | ???       |
| LMBOABOOH      | 9.99999 | ???       | 9.99999  | ???       |
| LME3FURANO2    | 9.99999 | ???       | 9.99999  | ???       |
| LZCO3HC23DBCOD | 9.99999 | ???       | 9.99999  | ???       |
| LC5PAN1719     | 9.99999 | ???       | 9.99999  | ???       |
| LISOPACNO3     | 9.99999 | ???       | 9.99999  | ???       |
| LISOPACNO3O2   | 9.99999 | ???       | 9.99999  | ???       |
| LMBOABNO3      | 9.99999 | ???       | 9.99999  | ???       |
| LNISO3         | 9.99999 | ???       | 9.99999  | ???       |
| LNISOOH        | 9.99999 | ???       | 9.99999  | ???       |
| LNMBOABO2      | 9.99999 | ???       | 9.99999  | ???       |
| LNMBOABOOH     | 9.99999 | ???       | 9.99999  | ???       |
| C614CO         | 9.99999 | ???       | 9.99999  | ???       |
| C614O2         | 9.99999 | ???       | 9.99999  | ???       |
| C614OOH        | 9.99999 | ???       | 9.99999  | ???       |

| KPP name   | $K_a$   | Reference | $K_{a2}$ | Reference |
|------------|---------|-----------|----------|-----------|
| CO235C5CHO | 9.99999 | ???       | 9.99999  | ???       |
| CO235C6O2  | 9.99999 | ???       | 9.99999  | ???       |
| CO235C6OOH | 9.99999 | ???       | 9.99999  | ???       |
| BENZENE    | 9.99999 | ???       | 9.99999  | ???       |
| BZBIPERO2  | 9.99999 | ???       | 9.99999  | ???       |
| BZBIPEROOH | 9.99999 | ???       | 9.99999  | ???       |
| BZEMUCCO   | 9.99999 | ???       | 9.99999  | ???       |
| BZEMUCCO2H | 9.99999 | ???       | 9.99999  | ???       |
| BZEMUCCO3  | 9.99999 | ???       | 9.99999  | ???       |
| BZEMUCCO3H | 9.99999 | ???       | 9.99999  | ???       |
| BZEMUCO2   | 9.99999 | ???       | 9.99999  | ???       |
| BZEMUCOOH  | 9.99999 | ???       | 9.99999  | ???       |
| BZEPOXMUC  | 9.99999 | ???       | 9.99999  | ???       |
| BZOBIPEROH | 9.99999 | ???       | 9.99999  | ???       |
| C5CO2DBCO3 | 9.99999 | ???       | 9.99999  | ???       |
| C5CO2DCO3H | 9.99999 | ???       | 9.99999  | ???       |
| C5CO2OHCO3 | 9.99999 | ???       | 9.99999  | ???       |
| C5COOHCO3H | 9.99999 | ???       | 9.99999  | ???       |
| C6125CO    | 9.99999 | ???       | 9.99999  | ???       |
| C615CO2O2  | 9.99999 | ???       | 9.99999  | ???       |
| C615CO2OOH | 9.99999 | ???       | 9.99999  | ???       |
| C6CO4DB    | 9.99999 | ???       | 9.99999  | ???       |
| C6H5O      | 9.99999 | ???       | 9.99999  | ???       |
| C6H5O2     | 9.99999 | ???       | 9.99999  | ???       |
| C6H5OOH    | 9.99999 | ???       | 9.99999  | ???       |
| CATEC1O    | 9.99999 | ???       | 9.99999  | ???       |
| CATEC1O2   | 9.99999 | ???       | 9.99999  | ???       |
| CATEC1OOH  | 9.99999 | ???       | 9.99999  | ???       |
| CATECHOL   | 9.99999 | ???       | 9.99999  | ???       |
| CPDKETENE  | 9.99999 | ???       | 9.99999  | ???       |
| PBZQCO     | 9.99999 | ???       | 9.99999  | ???       |
| PBZQO2     | 9.99999 | ???       | 9.99999  | ???       |
| PBZQONE    | 9.99999 | ???       | 9.99999  | ???       |
| PBZQOOH    | 9.99999 | ???       | 9.99999  | ???       |
| PHENO2     | 9.99999 | ???       | 9.99999  | ???       |
| PHENOL     | 9.99999 | ???       | 9.99999  | ???       |
| PHENOOH    | 9.99999 | ???       | 9.99999  | ???       |
| C614NO3    | 9.99999 | ???       | 9.99999  | ???       |
| BZBIPERNO3 | 9.99999 | ???       | 9.99999  | ???       |
| BZEMUCNO3  | 9.99999 | ???       | 9.99999  | ???       |
| BZEMUCPAN  | 9.99999 | ???       | 9.99999  | ???       |
| C5CO2DBPAN | 9.99999 | ???       | 9.99999  | ???       |
| C5CO2OHPAN | 9.99999 | ???       | 9.99999  | ???       |
| DNPHEN     | 9.99999 | ???       | 9.99999  | ???       |
| DNPHEO2    | 9.99999 | ???       | 9.99999  | ???       |
| DNPHEOOH   | 9.99999 | ???       | 9.99999  | ???       |
| HOC6H4NO2  | 9.99999 | ???       | 9.99999  | ???       |
| NBZQO2     | 9.99999 | ???       | 9.99999  | ???       |
| NBZQOOH    | 9.99999 | ???       | 9.99999  | ???       |

| KPP name   | $K_a$   | Reference   | $K_{a2}$ | Reference |
|------------|---------|-------------|----------|-----------|
| NCATECHOL  | 9.99999 | ???         | 9.99999  | ???       |
| NCATECO2   | 9.99999 | ???         | 9.99999  | ???       |
| NCATECOOH  | 9.99999 | ???         | 9.99999  | ???       |
| NCPDKETENE | 9.99999 | ???         | 9.99999  | ???       |
| NDNPHEO2   | 9.99999 | ???         | 9.99999  | ???       |
| NDNPHENOOH | 9.99999 | ???         | 9.99999  | ???       |
| NNCATECO2  | 9.99999 | ???         | 9.99999  | ???       |
| NNCATECOOH | 9.99999 | ???         | 9.99999  | ???       |
| NPHEN1O    | 9.99999 | ???         | 9.99999  | ???       |
| NPHEN1O2   | 9.99999 | ???         | 9.99999  | ???       |
| NPHEN1OOH  | 9.99999 | ???         | 9.99999  | ???       |
| NPHENO2    | 9.99999 | ???         | 9.99999  | ???       |
| NPHENOOH   | 9.99999 | ???         | 9.99999  | ???       |
| C235C6CO3H | 9.99999 | ???         | 9.99999  | ???       |
| C716O2     | 9.99999 | ???         | 9.99999  | ???       |
| C716OOH    | 9.99999 | ???         | 9.99999  | ???       |
| C721O2     | 9.99999 | ???         | 9.99999  | ???       |
| C721OOH    | 9.99999 | ???         | 9.99999  | ???       |
| C722O2     | 9.99999 | ???         | 9.99999  | ???       |
| C722OOH    | 9.99999 | ???         | 9.99999  | ???       |
| CO235C6CHO | 9.99999 | ???         | 9.99999  | ???       |
| CO235C6CO3 | 9.99999 | ???         | 9.99999  | ???       |
| MCPDKETENE | 9.99999 | ???         | 9.99999  | ???       |
| ROO6R3O    | 9.99999 | ???         | 9.99999  | ???       |
| ROO6R3O2   | 9.99999 | ???         | 9.99999  | ???       |
| ROO6R5O2   | 9.99999 | ???         | 9.99999  | ???       |
| BENZAL     | 9.99999 | ???         | 9.99999  | ???       |
| C6CO2OHCO3 | 9.99999 | ???         | 9.99999  | ???       |
| C6COOHCO3H | 9.99999 | ???         | 9.99999  | ???       |
| C6H5CH2O2  | 9.99999 | ???         | 9.99999  | ???       |
| C6H5CH2OOH | 9.99999 | ???         | 9.99999  | ???       |
| C6H5CO3    | 9.99999 | ???         | 9.99999  | ???       |
| C6H5CO3H   | 9.99999 | ???         | 9.99999  | ???       |
| C7CO4DB    | 9.99999 | ???         | 9.99999  | ???       |
| CRESO2     | 9.99999 | ???         | 9.99999  | ???       |
| CRESOL     | 9.99999 | ???         | 9.99999  | ???       |
| CRESOOH    | 9.99999 | ???         | 9.99999  | ???       |
| MCATEC1O   | 9.99999 | ???         | 9.99999  | ???       |
| MCATEC1O2  | 9.99999 | ???         | 9.99999  | ???       |
| MCATEC1OOH | 9.99999 | ???         | 9.99999  | ???       |
| MCATECHOL  | 9.99999 | ???         | 9.99999  | ???       |
| OXYL1O2    | 9.99999 | ???         | 9.99999  | ???       |
| OXYL1OOH   | 9.99999 | ???         | 9.99999  | ???       |
| PHCOOH     | 6.25E-5 | Lide (2008) | 9.99999  | ???       |
| PTLQCO     | 9.99999 | ???         | 9.99999  | ???       |
| PTLQO2     | 9.99999 | ???         | 9.99999  | ???       |
| PTLQONE    | 9.99999 | ???         | 9.99999  | ???       |
| PTLQOOH    | 9.99999 | ???         | 9.99999  | ???       |
| TLBIPERO2  | 9.99999 | ???         | 9.99999  | ???       |

| KPP name    | $K_a$   | Reference | $K_{a2}$ | Reference |
|-------------|---------|-----------|----------|-----------|
| TLBIPEROOH  | 9.99999 | ???       | 9.99999  | ???       |
| TLEMUCCO    | 9.99999 | ???       | 9.99999  | ???       |
| TLEMUCCO2H  | 9.99999 | ???       | 9.99999  | ???       |
| TLEMUCCO3   | 9.99999 | ???       | 9.99999  | ???       |
| TLEMUCCO3H  | 9.99999 | ???       | 9.99999  | ???       |
| TLEMUCO2    | 9.99999 | ???       | 9.99999  | ???       |
| TLEMUCOOH   | 9.99999 | ???       | 9.99999  | ???       |
| TLEPOXMUC   | 9.99999 | ???       | 9.99999  | ???       |
| TLOBIPEROH  | 9.99999 | ???       | 9.99999  | ???       |
| TOL1O       | 9.99999 | ???       | 9.99999  | ???       |
| TOLUENE     | 9.99999 | ???       | 9.99999  | ???       |
| C7PAN3      | 9.99999 | ???       | 9.99999  | ???       |
| C6CO2OHPAN  | 9.99999 | ???       | 9.99999  | ???       |
| C6H5CH2NO3  | 9.99999 | ???       | 9.99999  | ???       |
| DNCRES      | 9.99999 | ???       | 9.99999  | ???       |
| DNCRESO2    | 9.99999 | ???       | 9.99999  | ???       |
| DNCRESOOH   | 9.99999 | ???       | 9.99999  | ???       |
| MNCATECH    | 9.99999 | ???       | 9.99999  | ???       |
| MNCATECO2   | 9.99999 | ???       | 9.99999  | ???       |
| MNCATECOOH  | 9.99999 | ???       | 9.99999  | ???       |
| MNCPDKETENE | 9.99999 | ???       | 9.99999  | ???       |
| MNNCATCOOH  | 9.99999 | ???       | 9.99999  | ???       |
| MNNCATECO2  | 9.99999 | ???       | 9.99999  | ???       |
| NCRES1O     | 9.99999 | ???       | 9.99999  | ???       |
| NCRES1O2    | 9.99999 | ???       | 9.99999  | ???       |
| NCRES1OOH   | 9.99999 | ???       | 9.99999  | ???       |
| NCRESO2     | 9.99999 | ???       | 9.99999  | ???       |
| NCRESOOH    | 9.99999 | ???       | 9.99999  | ???       |
| NDNCRESO2   | 9.99999 | ???       | 9.99999  | ???       |
| NDNCRESOOH  | 9.99999 | ???       | 9.99999  | ???       |
| NPTLQO2     | 9.99999 | ???       | 9.99999  | ???       |
| NPTLQOOH    | 9.99999 | ???       | 9.99999  | ???       |
| PBZN        | 9.99999 | ???       | 9.99999  | ???       |
| TLBIPERNO3  | 9.99999 | ???       | 9.99999  | ???       |
| TLEMUCNO3   | 9.99999 | ???       | 9.99999  | ???       |
| TLEMUCPAN   | 9.99999 | ???       | 9.99999  | ???       |
| TOL1OHNO2   | 9.99999 | ???       | 9.99999  | ???       |
| C721CHO     | 9.99999 | ???       | 9.99999  | ???       |
| C721CO3     | 9.99999 | ???       | 9.99999  | ???       |
| C721CO3H    | 9.99999 | ???       | 9.99999  | ???       |
| C810O2      | 9.99999 | ???       | 9.99999  | ???       |
| C810OOH     | 9.99999 | ???       | 9.99999  | ???       |
| C811O2      | 9.99999 | ???       | 9.99999  | ???       |
| C812O2      | 9.99999 | ???       | 9.99999  | ???       |
| C812OOH     | 9.99999 | ???       | 9.99999  | ???       |
| C813O2      | 9.99999 | ???       | 9.99999  | ???       |
| C813OOH     | 9.99999 | ???       | 9.99999  | ???       |
| C85O2       | 9.99999 | ???       | 9.99999  | ???       |
| C85OOH      | 9.99999 | ???       | 9.99999  | ???       |

| KPP name   | $K_a$     | Reference | $K_{a2}$  | Reference |
|------------|-----------|-----------|-----------|-----------|
| C86O2      | 9.99999   | ???       | 9.99999   | ???       |
| C86OOH     | 9.99999   | ???       | 9.99999   | ???       |
| C89O2      | 9.99999   | ???       | 9.99999   | ???       |
| C89OOH     | 9.99999   | ???       | 9.99999   | ???       |
| C8BC       | 9.99999   | ???       | 9.99999   | ???       |
| C8BCCO     | 9.99999   | ???       | 9.99999   | ???       |
| C8BCO2     | 9.99999   | ???       | 9.99999   | ???       |
| C8BCOOH    | 9.99999   | ???       | 9.99999   | ???       |
| NORPINIC   | 6.166E-05 | see notes | 2.291E-06 | see notes |
| EBENZ      | 9.99999   | ???       | 9.99999   | ???       |
| LXYL       | 9.99999   | ???       | 9.99999   | ???       |
| STYRENE    | 9.99999   | ???       | 9.99999   | ???       |
| STYRENO2   | 9.99999   | ???       | 9.99999   | ???       |
| STYRENOOH  | 9.99999   | ???       | 9.99999   | ???       |
| C721PAN    | 9.99999   | ???       | 9.99999   | ???       |
| C810NO3    | 9.99999   | ???       | 9.99999   | ???       |
| C89NO3     | 9.99999   | ???       | 9.99999   | ???       |
| C8BCNO3    | 9.99999   | ???       | 9.99999   | ???       |
| NSTYRENO2  | 9.99999   | ???       | 9.99999   | ???       |
| NSTYRENOOH | 9.99999   | ???       | 9.99999   | ???       |
| C811CO3    | 9.99999   | ???       | 9.99999   | ???       |
| C811CO3H   | 9.99999   | ???       | 9.99999   | ???       |
| C85CO3     | 9.99999   | ???       | 9.99999   | ???       |
| C85CO3H    | 9.99999   | ???       | 9.99999   | ???       |
| C89CO2H    | 9.99999   | ???       | 9.99999   | ???       |
| C89CO3     | 9.99999   | ???       | 9.99999   | ???       |
| C89CO3H    | 9.99999   | ???       | 9.99999   | ???       |
| C96O2      | 9.99999   | ???       | 9.99999   | ???       |
| C96OOH     | 9.99999   | ???       | 9.99999   | ???       |
| C97O2      | 9.99999   | ???       | 9.99999   | ???       |
| C97OOH     | 9.99999   | ???       | 9.99999   | ???       |
| C98O2      | 9.99999   | ???       | 9.99999   | ???       |
| C98OOH     | 9.99999   | ???       | 9.99999   | ???       |
| NOPINDCO   | 9.99999   | ???       | 9.99999   | ???       |
| NOPINDO2   | 9.99999   | ???       | 9.99999   | ???       |
| NOPINDOOH  | 9.99999   | ???       | 9.99999   | ???       |
| NOPINONE   | 9.99999   | ???       | 9.99999   | ???       |
| NOPINOO    | 9.99999   | ???       | 9.99999   | ???       |
| NORPINAL   | 9.99999   | ???       | 9.99999   | ???       |
| NORPINENOL | 9.99999   | ???       | 9.99999   | ???       |
| PINIC      | 6.166E-05 | see notes | 2.291E-06 | see notes |
| RO6R3P     | 9.99999   | ???       | 9.99999   | ???       |
| C811PAN    | 9.99999   | ???       | 9.99999   | ???       |
| C89PAN     | 9.99999   | ???       | 9.99999   | ???       |
| C96NO3     | 9.99999   | ???       | 9.99999   | ???       |
| C9PAN2     | 9.99999   | ???       | 9.99999   | ???       |
| LTMB       | 9.99999   | ???       | 9.99999   | ???       |
| APINAOO    | 9.99999   | ???       | 9.99999   | ???       |
| APINBOO    | 9.99999   | ???       | 9.99999   | ???       |

| KPP name        | $K_a$   | Reference | $K_{a2}$ | Reference |
|-----------------|---------|-----------|----------|-----------|
| APINENE         | 9.99999 | ???       | 9.99999  | ???       |
| BPINAO2         | 9.99999 | ???       | 9.99999  | ???       |
| BPINAOOH        | 9.99999 | ???       | 9.99999  | ???       |
| BPINENE         | 9.99999 | ???       | 9.99999  | ???       |
| C106O2          | 9.99999 | ???       | 9.99999  | ???       |
| C106OOH         | 9.99999 | ???       | 9.99999  | ???       |
| C109CO          | 9.99999 | ???       | 9.99999  | ???       |
| C109O2          | 9.99999 | ???       | 9.99999  | ???       |
| C109OOH         | 9.99999 | ???       | 9.99999  | ???       |
| C96CO3          | 9.99999 | ???       | 9.99999  | ???       |
| CAMPHENE        | 9.99999 | ???       | 9.99999  | ???       |
| CARENE          | 9.99999 | ???       | 9.99999  | ???       |
| MENTHEN6ONE     | 9.99999 | ???       | 9.99999  | ???       |
| OH2MENTHEN6ONE  | 9.99999 | ???       | 9.99999  | ???       |
| OHMENTHEN6ONEO2 | 9.99999 | ???       | 9.99999  | ???       |
| PERPINONIC      | 9.99999 | ???       | 9.99999  | ???       |
| PINAL           | 9.99999 | ???       | 9.99999  | ???       |
| PINALO2         | 9.99999 | ???       | 9.99999  | ???       |
| PINALOOH        | 9.99999 | ???       | 9.99999  | ???       |
| PINENOL         | 9.99999 | ???       | 9.99999  | ???       |
| PINONIC         | 9.99999 | ???       | 9.99999  | ???       |
| RO6R1O2         | 9.99999 | ???       | 9.99999  | ???       |
| RO6R3O2         | 9.99999 | ???       | 9.99999  | ???       |
| RO6R3OOH        | 9.99999 | ???       | 9.99999  | ???       |
| ROO6R1O2        | 9.99999 | ???       | 9.99999  | ???       |
| SABINENE        | 9.99999 | ???       | 9.99999  | ???       |
| BPINANO3        | 9.99999 | ???       | 9.99999  | ???       |
| C106NO3         | 9.99999 | ???       | 9.99999  | ???       |
| C10PAN2         | 9.99999 | ???       | 9.99999  | ???       |
| PINALNO3        | 9.99999 | ???       | 9.99999  | ???       |
| RO6R1NO3        | 9.99999 | ???       | 9.99999  | ???       |
| RO6R3NO3        | 9.99999 | ???       | 9.99999  | ???       |
| ROO6R1NO3       | 9.99999 | ???       | 9.99999  | ???       |
| LAPINABNO3      | 9.99999 | ???       | 9.99999  | ???       |
| LAPINABO2       | 9.99999 | ???       | 9.99999  | ???       |
| LAPINABOOH      | 9.99999 | ???       | 9.99999  | ???       |
| LNAPINABO2      | 9.99999 | ???       | 9.99999  | ???       |
| LNAPINABOOH     | 9.99999 | ???       | 9.99999  | ???       |
| LNBPINABO2      | 9.99999 | ???       | 9.99999  | ???       |
| LNBPINABOOH     | 9.99999 | ???       | 9.99999  | ???       |
| LHAROM          | 9.99999 | ???       | 9.99999  | ???       |
| CHF3            | 9.99999 | ???       | 9.99999  | ???       |
| CHF2CF3         | 9.99999 | ???       | 9.99999  | ???       |
| CH3CF3          | 9.99999 | ???       | 9.99999  | ???       |
| CH2F2           | 9.99999 | ???       | 9.99999  | ???       |
| CH3CHF2         | 9.99999 | ???       | 9.99999  | ???       |
| CCl4            | 9.99999 | ???       | 9.99999  | ???       |
| CF2Cl2          | 9.99999 | ???       | 9.99999  | ???       |
| CF2ClCF2Cl      | 9.99999 | ???       | 9.99999  | ???       |

| KPP name   | $K_a$   | Reference | $K_{a2}$ | Reference |
|------------|---------|-----------|----------|-----------|
| CF2ClCFCI2 | 9.99999 | ???       | 9.99999  | ???       |
| CF3CF2Cl   | 9.99999 | ???       | 9.99999  | ???       |
| CFCl3      | 9.99999 | ???       | 9.99999  | ???       |
| CH2Cl2     | 9.99999 | ???       | 9.99999  | ???       |
| CH2FCF3    | 9.99999 | ???       | 9.99999  | ???       |
| CH3CCl3    | 9.99999 | ???       | 9.99999  | ???       |
| CH3CFCI2   | 9.99999 | ???       | 9.99999  | ???       |
| CH3Cl      | 9.99999 | ???       | 9.99999  | ???       |
| CHCl3      | 9.99999 | ???       | 9.99999  | ???       |
| CHF2Cl     | 9.99999 | ???       | 9.99999  | ???       |
| Cl         | 9.99999 | ???       | 9.99999  | ???       |
| Cl2        | 9.99999 | ???       | 9.99999  | ???       |
| Cl2O2      | 9.99999 | ???       | 9.99999  | ???       |
| ClNO2      | 9.99999 | ???       | 9.99999  | ???       |
| ClNO3      | 9.99999 | ???       | 9.99999  | ???       |
| ClO        | 9.99999 | ???       | 9.99999  | ???       |
| HCl        | 9.99999 | ???       | 9.99999  | ???       |
| HOCl       | 9.99999 | ???       | 9.99999  | ???       |
| OCIO       | 9.99999 | ???       | 9.99999  | ???       |
| LCHLORINE  | 9.99999 | ???       | 9.99999  | ???       |
| Br         | 9.99999 | ???       | 9.99999  | ???       |
| Br2        | 9.99999 | ???       | 9.99999  | ???       |
| BrCl       | 9.99999 | ???       | 9.99999  | ???       |
| BrNO2      | 9.99999 | ???       | 9.99999  | ???       |
| BrNO3      | 9.99999 | ???       | 9.99999  | ???       |
| BrO        | 9.99999 | ???       | 9.99999  | ???       |
| CF2ClBr    | 9.99999 | ???       | 9.99999  | ???       |
| CF3Br      | 9.99999 | ???       | 9.99999  | ???       |
| CH2Br2     | 9.99999 | ???       | 9.99999  | ???       |
| CH2ClBr    | 9.99999 | ???       | 9.99999  | ???       |
| CH3Br      | 9.99999 | ???       | 9.99999  | ???       |
| CHBr3      | 9.99999 | ???       | 9.99999  | ???       |
| CHCl2Br    | 9.99999 | ???       | 9.99999  | ???       |
| CHClBr2    | 9.99999 | ???       | 9.99999  | ???       |
| HBr        | 9.99999 | ???       | 9.99999  | ???       |
| HOBr       | 9.99999 | ???       | 9.99999  | ???       |
| LBROMINE   | 9.99999 | ???       | 9.99999  | ???       |
| C3H7I      | 9.99999 | ???       | 9.99999  | ???       |
| CH2CI      | 9.99999 | ???       | 9.99999  | ???       |
| CH2I2      | 9.99999 | ???       | 9.99999  | ???       |
| CH3I       | 9.99999 | ???       | 9.99999  | ???       |
| HI         | 9.99999 | ???       | 9.99999  | ???       |
| HIO3       | 9.99999 | ???       | 9.99999  | ???       |
| HOI        | 9.99999 | ???       | 9.99999  | ???       |
| I          | 9.99999 | ???       | 9.99999  | ???       |
| I2         | 9.99999 | ???       | 9.99999  | ???       |
| I2O2       | 9.99999 | ???       | 9.99999  | ???       |
| IBr        | 9.99999 | ???       | 9.99999  | ???       |
| ICl        | 9.99999 | ???       | 9.99999  | ???       |

| KPP name   | $K_a$   | Reference                  | $K_{a2}$ | Reference                  |
|------------|---------|----------------------------|----------|----------------------------|
| INO2       | 9.99999 | ???                        | 9.99999  | ???                        |
| INO3       | 9.99999 | ???                        | 9.99999  | ???                        |
| IO         | 9.99999 | ???                        | 9.99999  | ???                        |
| IPART      | 9.99999 | ???                        | 9.99999  | ???                        |
| OIO        | 9.99999 | ???                        | 9.99999  | ???                        |
| CH3SO2     | 9.99999 | ???                        | 9.99999  | ???                        |
| CH3SO3     | 9.99999 | ???                        | 9.99999  | ???                        |
| CH3SO3H    | 9.99999 | ???                        | 9.99999  | ???                        |
| DMS        | 9.99999 | ???                        | 9.99999  | ???                        |
| DMSO       | 9.99999 | ???                        | 9.99999  | ???                        |
| H2SO4      | 1E3     | see notes                  | 1.023E-2 | see notes                  |
| OCS        | 9.99999 | ???                        | 9.99999  | ???                        |
| S          | 9.99999 | ???                        | 9.99999  | ???                        |
| SF6        | 9.99999 | ???                        | 9.99999  | ???                        |
| SH         | 9.99999 | ???                        | 9.99999  | ???                        |
| SO         | 9.99999 | ???                        | 9.99999  | ???                        |
| SO2        | 1.23E-2 | Pandis and Seinfeld (1989) | 6.61E-8  | Pandis and Seinfeld (1989) |
| SO3        | 9.99999 | ???                        | 9.99999  | ???                        |
| LSULFUR    | 9.99999 | ???                        | 9.99999  | ???                        |
| Hg         | 9.99999 | ???                        | 9.99999  | ???                        |
| HgO        | 9.99999 | ???                        | 9.99999  | ???                        |
| HgCl       | 9.99999 | ???                        | 9.99999  | ???                        |
| HgCl2      | 9.99999 | ???                        | 9.99999  | ???                        |
| HgBr       | 9.99999 | ???                        | 9.99999  | ???                        |
| HgBr2      | 9.99999 | ???                        | 9.99999  | ???                        |
| ClHgBr     | 9.99999 | ???                        | 9.99999  | ???                        |
| BrHgOBr    | 9.99999 | ???                        | 9.99999  | ???                        |
| ClHgOBr    | 9.99999 | ???                        | 9.99999  | ???                        |
| LTERP      | 9.99999 | ???                        | 9.99999  | ???                        |
| LALK4      | 9.99999 | ???                        | 9.99999  | ???                        |
| LALK5      | 9.99999 | ???                        | 9.99999  | ???                        |
| LARO1      | 9.99999 | ???                        | 9.99999  | ???                        |
| LARO2      | 9.99999 | ???                        | 9.99999  | ???                        |
| LOLE1      | 9.99999 | ???                        | 9.99999  | ???                        |
| LOLE2      | 9.99999 | ???                        | 9.99999  | ???                        |
| LfPOG02    | 9.99999 | ???                        | 9.99999  | ???                        |
| LfPOG03    | 9.99999 | ???                        | 9.99999  | ???                        |
| LfPOG04    | 9.99999 | ???                        | 9.99999  | ???                        |
| LfPOG05    | 9.99999 | ???                        | 9.99999  | ???                        |
| LbbPOG02   | 9.99999 | ???                        | 9.99999  | ???                        |
| LbbPOG03   | 9.99999 | ???                        | 9.99999  | ???                        |
| LbbPOG04   | 9.99999 | ???                        | 9.99999  | ???                        |
| LfSOGsv01  | 9.99999 | ???                        | 9.99999  | ???                        |
| LfSOGsv02  | 9.99999 | ???                        | 9.99999  | ???                        |
| LbbSOGsv01 | 9.99999 | ???                        | 9.99999  | ???                        |
| LbbSOGsv02 | 9.99999 | ???                        | 9.99999  | ???                        |
| LfSOGiv01  | 9.99999 | ???                        | 9.99999  | ???                        |
| LfSOGiv02  | 9.99999 | ???                        | 9.99999  | ???                        |
| LfSOGiv03  | 9.99999 | ???                        | 9.99999  | ???                        |



| KPP name   | $K_a$   | Reference | $K_{a2}$ | Reference |
|------------|---------|-----------|----------|-----------|
| LfSOGiv04  | 9.99999 | ???       | 9.99999  | ???       |
| LbbSOGiv01 | 9.99999 | ???       | 9.99999  | ???       |
| LbbSOGiv02 | 9.99999 | ???       | 9.99999  | ???       |
| LbbSOGiv03 | 9.99999 | ???       | 9.99999  | ???       |
| LbSOGv01   | 9.99999 | ???       | 9.99999  | ???       |
| LbSOGv02   | 9.99999 | ???       | 9.99999  | ???       |
| LbSOGv03   | 9.99999 | ???       | 9.99999  | ???       |
| LbSOGv04   | 9.99999 | ???       | 9.99999  | ???       |
| LbOSOGv01  | 9.99999 | ???       | 9.99999  | ???       |
| LbOSOGv02  | 9.99999 | ???       | 9.99999  | ???       |
| LbOSOGv03  | 9.99999 | ???       | 9.99999  | ???       |
| LaSOGv01   | 9.99999 | ???       | 9.99999  | ???       |
| LaSOGv02   | 9.99999 | ???       | 9.99999  | ???       |
| LaSOGv03   | 9.99999 | ???       | 9.99999  | ???       |
| LaSOGv04   | 9.99999 | ???       | 9.99999  | ???       |
| LaOSOGv01  | 9.99999 | ???       | 9.99999  | ???       |
| LaOSOGv02  | 9.99999 | ???       | 9.99999  | ???       |
| LaOSOGv03  | 9.99999 | ???       | 9.99999  | ???       |
| ISO2       | 9.99999 | ???       | 9.99999  | ???       |
| ISON       | 9.99999 | ???       | 9.99999  | ???       |
| ISOOH      | 9.99999 | ???       | 9.99999  | ???       |
| LHOC3H6O2  | 9.99999 | ???       | 9.99999  | ???       |
| LHOC3H6OOH | 9.99999 | ???       | 9.99999  | ???       |
| MVKO2      | 9.99999 | ???       | 9.99999  | ???       |
| MVKOOH     | 9.99999 | ???       | 9.99999  | ???       |
| NACA       | 9.99999 | ???       | 9.99999  | ???       |
| ONE        | 9.99999 | ???       | 9.99999  | ???       |
| O          | 9.99999 | ???       | 9.99999  | ???       |
| C          | 9.99999 | ???       | 9.99999  | ???       |
| OXL        | 9.99999 | ???       | 9.99999  | ???       |

| KPP name  | pss      | Reference | dryreac  | Reference |
|-----------|----------|-----------|----------|-----------|
| O1D       | -9.99999 | ???       | -9.99999 | ???       |
| O3P       | -9.99999 | ???       | -9.99999 | ???       |
| O2        | 0.0      | ???       | 0.0      | ???       |
| O3        | 0.01     | ???       | 1.0      | ???       |
| H         | -9.99999 | ???       | -9.99999 | ???       |
| H2        | -9.99999 | ???       | -9.99999 | ???       |
| OH        | 25.      | ???       | 0.0      | ???       |
| HO2       | 1.37E6   | ???       | 1.0      | ???       |
| H2O       | 0.0      | ???       | 0.0      | ???       |
| H2O2      | 7.45E4   | ???       | 1.0      | ???       |
| H2OH2O    | -9.99999 | ???       | -9.99999 | ???       |
| N         | -9.99999 | ???       | -9.99999 | ???       |
| N2D       | -9.99999 | ???       | -9.99999 | ???       |
| N2        | -9.99999 | ???       | -9.99999 | ???       |
| NH3       | 1.02E4   | ???       | 0.0      | ???       |
| N2O       | -9.99999 | ???       | -9.99999 | ???       |
| NO        | 2.E-3    | ???       | 1.0      | ???       |
| NO2       | 1.0E-2   | ???       | 1.0      | ???       |
| NO3       | 1.8      | ???       | 1.0      | ???       |
| N2O5      | 1.E4     | ???       | 1.0      | ???       |
| HONO      | 5.05E4   | ???       | 0.1      | ???       |
| HNO3      | 1.E4     | ???       | 1.0      | ???       |
| HNO4      | 1.E4     | ???       | 1.0      | ???       |
| NH2       | -9.99999 | ???       | 0.0      | ???       |
| HNO       | -9.99999 | ???       | 0.0      | ???       |
| NHOH      | -9.99999 | ???       | 0.0      | ???       |
| NH2O      | -9.99999 | ???       | 0.0      | ???       |
| NH2OH     | -9.99999 | ???       | 0.0      | ???       |
| LNITROGEN | -9.99999 | ???       | -9.99999 | ???       |
| CH2OO     | -9.99999 | ???       | -9.99999 | ???       |
| CH2OOA    | -9.99999 | ???       | -9.99999 | ???       |
| CH3       | -9.99999 | ???       | -9.99999 | ???       |
| CH3O      | -9.99999 | ???       | -9.99999 | ???       |
| CH3O2     | 6.       | ???       | 1.0      | ???       |
| CH3OH     | 2.2E2    | ???       | 0.1      | ???       |
| CH3OOH    | 3.E2     | ???       | 0.1      | ???       |
| CH4       | -9.99999 | ???       | -9.99999 | ???       |
| CO        | -9.99999 | ???       | -9.99999 | ???       |
| CO2       | 0.0      | ???       | 0.0      | ???       |
| HCHO      | 3.2E3    | ???       | 0.1      | ???       |
| HCOOH     | 6.7E6    | ???       | 0.0      | ???       |
| HOCH2O2   | 4.6E4    | ???       | 1.0      | ???       |
| HOCH2OH   | 1.7E6    | ???       | 0.1      | ???       |
| HOCH2OOH  | 1.7E6    | ???       | 0.1      | ???       |
| CH3NO3    | 2.       | ???       | 0.1      | ???       |
| CH3O2NO2  | 2.       | ???       | 0.1      | ???       |
| CH3ONO    | 2.       | ???       | 0.1      | ???       |
| CN        | -9.99999 | ???       | -9.99999 | ???       |
| HCN       | 7.6      | ???       | 0.1      | ???       |

| KPP name   | pss      | Reference | dryreac  | Reference |
|------------|----------|-----------|----------|-----------|
| HOCH2O2NO2 | 2.       | ???       | 0.1      | ???       |
| NCO        | -9.99999 | ???       | -9.99999 | ???       |
| LCARBON    | -9.99999 | ???       | -9.99999 | ???       |
| C2H2       | -9.99999 | ???       | -9.99999 | ???       |
| C2H4       | -9.99999 | ???       | -9.99999 | ???       |
| C2H5O2     | 0.0      | ???       | 0.0      | ???       |
| C2H5OH     | 2.0E2    | ???       | 0.1      | ???       |
| C2H5OOH    | 3.4E2    | ???       | 0.1      | ???       |
| C2H6       | -9.99999 | ???       | -9.99999 | ???       |
| CH2CHOH    | 2.0E2    | ???       | 0.1      | ???       |
| CH2CO      | 1.0E6    | ???       | 0.1      | ???       |
| CH3CHO     | 1.3E1    | ???       | 0.1      | ???       |
| CH3CHOHO2  | -9.99999 | ???       | -9.99999 | ???       |
| CH3CHOHOOH | 1.0E6    | ???       | 0.1      | ???       |
| CH3CO      | -9.99999 | ???       | -9.99999 | ???       |
| CH3CO2H    | 7.4E5    | ???       | 0.1      | ???       |
| CH3CO3     | -9.99999 | ???       | -9.99999 | ???       |
| CH3CO3H    | 8.4E2    | ???       | 0.1      | ???       |
| ETHGLY     | 4.0E6    | ???       | 0.1      | ???       |
| GLYOX      | 4.2E5    | ???       | 0.1      | ???       |
| HCOCH2O2   | -9.99999 | ???       | -9.99999 | ???       |
| HCOCO      | -9.99999 | ???       | -9.99999 | ???       |
| HCOCO2H    | 6.6E7    | ???       | 0.1      | ???       |
| HCOCO3     | -9.99999 | ???       | -9.99999 | ???       |
| HCOCO3H    | 2.7E6    | ???       | 0.1      | ???       |
| HOCH2CH2O  | -9.99999 | ???       | -9.99999 | ???       |
| HOCH2CH2O2 | -9.99999 | ???       | -9.99999 | ???       |
| HOCH2CHO   | 4.10E4   | ???       | 0.1      | ???       |
| HOCH2CO    | -9.99999 | ???       | -9.99999 | ???       |
| HOCH2CO2H  | 4.2E7    | ???       | 0.1      | ???       |
| HOCH2CO3   | -9.99999 | ???       | -9.99999 | ???       |
| HOCH2CO3H  | 4.2E5    | ???       | 0.1      | ???       |
| HOCHCHO    | -9.99999 | ???       | -9.99999 | ???       |
| HOCH2CHO   | 1.0E6    | ???       | 0.1      | ???       |
| HOCH2CO2H  | 4.2E7    | ???       | 0.1      | ???       |
| HOCH2CO3   | -9.99999 | ???       | -9.99999 | ???       |
| HOCH2CO3H  | 1.0E6    | ???       | 0.1      | ???       |
| HYETHO2H   | 4.0E6    | ???       | 0.1      | ???       |
| C2H5NO3    | 1.6      | ???       | 0.1      | ???       |
| C2H5O2NO2  | 1.6      | ???       | 0.1      | ???       |
| CH3CN      | 5.3      | ???       | 0.1      | ???       |
| ETHOHNO3   | 3.9E4    | ???       | 0.1      | ???       |
| NCCH2O2    | -9.99999 | ???       | -9.99999 | ???       |
| NO3CH2CHO  | 1.6      | ???       | 0.1      | ???       |
| NO3CH2CO3  | -9.99999 | ???       | -9.99999 | ???       |
| NO3CH2PAN  | 2.8      | ???       | 0.1      | ???       |
| PAN        | 2.8      | ???       | 0.1      | ???       |
| PHAN       | 4.E4     | ???       | 0.1      | ???       |
| ACETOL     | 4.7E2    | ???       | -9.99999 | ???       |

| KPP name      | pss      | Reference | dryreac  | Reference |
|---------------|----------|-----------|----------|-----------|
| ALCOCH2OOH    | 1.0E6    | ???       | 0.1      | ???       |
| C2H5CHO       | 1.3E1    | ???       | 0.1      | ???       |
| C2H5CO2H      | 3.E5     | ???       | 0.1      | ???       |
| C2H5CO3       | -9.99999 | ???       | -9.99999 | ???       |
| C2H5CO3H      | 1.5E3    | ???       | 0.1      | ???       |
| C33CO         | 9.0E3    | ???       | 0.1      | ???       |
| C3H6          | -9.99999 | ???       | -9.99999 | ???       |
| C3H8          | -9.99999 | ???       | -9.99999 | ???       |
| CH3CHCO       | 1.0E6    | ???       | 0.1      | ???       |
| CH3COCH2O2    | -9.99999 | ???       | -9.99999 | ???       |
| CH3COCH3      | 3.E1     | ???       | 0.1      | ???       |
| CH3COCO2H     | 4.3E8    | ???       | 0.1      | ???       |
| CH3COCO3      | -9.99999 | ???       | -9.99999 | ???       |
| CH3COCO3H     | 1.0E6    | ???       | 0.1      | ???       |
| CHOCOCH2O2    | -9.99999 | ???       | -9.99999 | ???       |
| HCOCH2CHO     | 1.0E6    | ???       | 0.1      | ???       |
| HCOCH2CO2H    | 6.6E7    | ???       | 0.1      | ???       |
| HCOCH2CO3     | -9.99999 | ???       | -9.99999 | ???       |
| HCOCH2CO3H    | 1.0E6    | ???       | 0.1      | ???       |
| HCOCOCH2OOH   | 1.0E6    | ???       | 0.1      | ???       |
| HOC2H4CO2H    | 4.2E7    | ???       | 0.1      | ???       |
| HOC2H4CO3     | -9.99999 | ???       | -9.99999 | ???       |
| HOC2H4CO3H    | 1.0E6    | ???       | 0.1      | ???       |
| HOCH2COCH2O2  | -9.99999 | ???       | -9.99999 | ???       |
| HOCH2COCH2OOH | 1.0E6    | ???       | 0.1      | ???       |
| HOCH2COCHO    | 4.1E5    | ???       | 0.1      | ???       |
| HYPERACET     | 4.7E2    | ???       | 0.1      | ???       |
| HYPROPO2      | -9.99999 | ???       | -9.99999 | ???       |
| HYPROPO2H     | 9.2E5    | ???       | 0.1      | ???       |
| IC3H7O2       | -9.99999 | ???       | -9.99999 | ???       |
| IC3H7OOH      | 1.3E2    | ???       | 0.1      | ???       |
| IPROPOL       | 1.3E2    | ???       | 0.1      | ???       |
| MGLYOX        | 3.7E3    | ???       | 0.1      | ???       |
| NC3H7O2       | -9.99999 | ???       | -9.99999 | ???       |
| NC3H7OOH      | 1.3E2    | ???       | 0.1      | ???       |
| NPROPOL       | 1.3E2    | ???       | 0.1      | ???       |
| PROPENOL      | 1.3E1    | ???       | 0.1      | ???       |
| C32OH13CO     | 9.0E3    | ???       | 0.1      | ???       |
| C3DIALO2      | -9.99999 | ???       | -9.99999 | ???       |
| C3DIALOOH     | 9.0E3    | ???       | 0.1      | ???       |
| HCOCOHCOC3    | -9.99999 | ???       | -9.99999 | ???       |
| HCOCOHCOC3H   | 2.0E6    | ???       | 0.1      | ???       |
| METACETHO     | 3.7E3    | ???       | 0.1      | ???       |
| C3PAN1        | 1.0E6    | ???       | 0.1      | ???       |
| C3PAN2        | 1.0E6    | ???       | 0.1      | ???       |
| CH3COCH2O2NO2 | 1.0E3    | ???       | 0.1      | ???       |
| IC3H7NO3      | 0.83E0   | ???       | 0.1      | ???       |
| NC3H7NO3      | 0.83E0   | ???       | 0.1      | ???       |
| NOA           | 1.0E3    | ???       | 0.1      | ???       |

| KPP name      | pss      | Reference | dryreac  | Reference |
|---------------|----------|-----------|----------|-----------|
| PPN           | 2.8      | ???       | 0.1      | ???       |
| PR2O2HNO3     | 1.1E4    | ???       | 0.1      | ???       |
| PRONO3BO2     | -9.99999 | ???       | -9.99999 | ???       |
| PROPOLNO3     | 4.5E3    | ???       | 0.1      | ???       |
| HCOCOHPAN     | 4.0E4    | ???       | 0.1      | ???       |
| BIACET        | 7.4E1    | ???       | 0.1      | ???       |
| BIACETO2      | 1.0E6    | ???       | 0.1      | ???       |
| BIACETOH      | 1.3E3    | ???       | 0.1      | ???       |
| BIACETOOH     | 1.0E6    | ???       | 0.1      | ???       |
| BUT1ENE       | -9.99999 | ???       | -9.99999 | ???       |
| BUT2OLO       | 1.0E3    | ???       | 0.1      | ???       |
| BUT2OLO2      | -9.99999 | ???       | -9.99999 | ???       |
| BUT2OLOOH     | 1.0E6    | ???       | 0.1      | ???       |
| BUTENOL       | 8.9      | ???       | 0.1      | ???       |
| C312COCO3     | -9.99999 | ???       | -9.99999 | ???       |
| C312COCO3H    | 1.0E6    | ???       | 0.1      | ???       |
| C3H7CHO       | 8.9      | ???       | 0.1      | ???       |
| C413COOOH     | 1.0E6    | ???       | 0.1      | ???       |
| C44O2         | -9.99999 | ???       | -9.99999 | ???       |
| C44OOH        | 1.0E6    | ???       | 0.1      | ???       |
| C4CODIAL      | 1.0E6    | ???       | 0.1      | ???       |
| CBUT2ENE      | -9.99999 | ???       | -9.99999 | ???       |
| CH3COCHCO     | 1.0E6    | ???       | 0.1      | ???       |
| CH3COCHO2CHO  | -9.99999 | ???       | -9.99999 | ???       |
| CH3COCOCO2H   | 4.3E8    | ???       | 0.1      | ???       |
| CH3COOHCHCHO  | 1.0E6    | ???       | 0.1      | ???       |
| CHOC3COO2     | 1.0E6    | ???       | 0.1      | ???       |
| CO23C3CHO     | 3.6E5    | ???       | 0.1      | ???       |
| CO2C3CHO      | 1.7E3    | ???       | 0.1      | ???       |
| CO2H3CHO      | 4.1E5    | ???       | 0.1      | ???       |
| CO2H3CO2H     | 1.0E6    | ???       | 0.1      | ???       |
| CO2H3CO3      | -9.99999 | ???       | -9.99999 | ???       |
| CO2H3CO3H     | 1.E6     | ???       | 0.1      | ???       |
| EZCH3CO2CHCHO | -9.99999 | ???       | -9.99999 | ???       |
| EZCHOCCH3CHO2 | -9.99999 | ???       | -9.99999 | ???       |
| HCOCCH3CHOOH  | 1.0E6    | ???       | 0.1      | ???       |
| HCOCCH3CO     | 1.0E6    | ???       | 0.1      | ???       |
| HCOCO2CH3CHO  | -9.99999 | ???       | -9.99999 | ???       |
| HMAC          | 1.7E3    | ???       | 0.1      | ???       |
| HO12CO3C4     | 5.E7     | ???       | 0.1      | ???       |
| HVMK          | 1.7E3    | ???       | 0.1      | ???       |
| IBUTALOH      | 1.0E6    | ???       | 0.1      | ???       |
| IBUTDIAL      | 1.7E3    | ???       | 0.1      | ???       |
| IBUTOLBO2     | -9.99999 | ???       | -9.99999 | ???       |
| IBUTOLBOOH    | 1.0E6    | ???       | 0.1      | ???       |
| IC4H10        | -9.99999 | ???       | -9.99999 | ???       |
| IC4H9O2       | -9.99999 | ???       | -9.99999 | ???       |
| IC4H9OOH      | 1.1E2    | ???       | 0.1      | ???       |
| IPRCHO        | 5.9E-1   | ???       | 0.1      | ???       |

| KPP name   | pss      | Reference | dryreac  | Reference |
|------------|----------|-----------|----------|-----------|
| IPRCO3     | -9.99999 | ???       | -9.99999 | ???       |
| IPRHOCO2H  | 4.2E7    | ???       | 0.1      | ???       |
| IPRHOCO3   | -9.99999 | ???       | -9.99999 | ???       |
| IPRHOCO3H  | 1.0E6    | ???       | 0.1      | ???       |
| MACO2      | -9.99999 | ???       | -9.99999 | ???       |
| MACO2H     | 5.8E5    | ???       | 0.1      | ???       |
| MACO3      | -9.99999 | ???       | -9.99999 | ???       |
| MACO3H     | 3.4E3    | ???       | 0.1      | ???       |
| MACR       | 5.0E1    | ???       | 0.1      | ???       |
| MACRO      | -9.99999 | ???       | -9.99999 | ???       |
| MACRO2     | -9.99999 | ???       | -9.99999 | ???       |
| MACROH     | 5.E7     | ???       | 0.1      | ???       |
| MACROOH    | 5.E7     | ???       | 0.1      | ???       |
| MBOOO      | -9.99999 | ???       | -9.99999 | ???       |
| MEK        | 2.E1     | ???       | 0.1      | ???       |
| MEPROPENE  | -9.99999 | ???       | -9.99999 | ???       |
| MPROPENOL  | 5.9E-1   | ???       | 0.1      | ???       |
| MVK        | 2.3E1    | ???       | 0.1      | ???       |
| NC4H10     | -9.99999 | ???       | -9.99999 | ???       |
| PERIBUACID | 9.7E2    | ???       | 0.1      | ???       |
| TBUT2ENE   | -9.99999 | ???       | -9.99999 | ???       |
| TC4H9O2    | -9.99999 | ???       | -9.99999 | ???       |
| TC4H9OOH   | 7.0E1    | ???       | 0.1      | ???       |
| BZFUCO     | 9.0E3    | ???       | 0.1      | ???       |
| BZFUO2     | -9.99999 | ???       | -9.99999 | ???       |
| BZFUONE    | 36.      | ???       | 0.1      | ???       |
| BZFUOOH    | 2.0E6    | ???       | 0.1      | ???       |
| CO14O3CHO  | 3.6E5    | ???       | 0.1      | ???       |
| CO14O3CO2H | 6.6E7    | ???       | 0.1      | ???       |
| CO2C4DIAL  | 2.0E6    | ???       | 0.1      | ???       |
| EPXC4DIAL  | 3.6E5    | ???       | 0.1      | ???       |
| EPXDLCO2H  | 6.6E7    | ???       | 0.1      | ???       |
| EPXDLCO3   | -9.99999 | ???       | -9.99999 | ???       |
| EPXDLCO3H  | 9.0E3    | ???       | 0.1      | ???       |
| HOCOC4DIAL | 3.1E5    | ???       | 0.1      | ???       |
| MALANHY    | 36.      | ???       | 0.1      | ???       |
| MALANHYO2  | -9.99999 | ???       | -9.99999 | ???       |
| MALANHYOOH | 2.0E6    | ???       | 0.1      | ???       |
| MALDALCO2H | 6.6E7    | ???       | 0.1      | ???       |
| MALDALCO3H | 9.0E3    | ???       | 0.1      | ???       |
| MALDIAL    | 3.6E5    | ???       | 0.1      | ???       |
| MALDIALCO3 | -9.99999 | ???       | -9.99999 | ???       |
| MALDIALO2  | -9.99999 | ???       | -9.99999 | ???       |
| MALDIALOOH | 2.0E6    | ???       | 0.1      | ???       |
| MALNHYOHCO | 2.0E6    | ???       | 0.1      | ???       |
| MECOACEOOH | 3.1E5    | ???       | 0.1      | ???       |
| MECOACETO2 | -9.99999 | ???       | -9.99999 | ???       |
| BUT2OLNO3  | 8.8E1    | ???       | 0.1      | ???       |
| C312COPAN  | 1.0E6    | ???       | 0.1      | ???       |

| KPP name       | pss      | Reference | dryreac  | Reference |
|----------------|----------|-----------|----------|-----------|
| C4PAN5         | 1.0E6    | ???       | 0.1      | ???       |
| IBUTOLBNO3     | 8.8E1    | ???       | 0.1      | ???       |
| IC4H9NO3       | 6.4E-3   | ???       | 0.1      | ???       |
| MACRN          | 1.0E6    | ???       | 0.1      | ???       |
| MPAN           | 3.6      | ???       | 0.1      | ???       |
| MVKNO3         | 1.0E6    | ???       | 0.1      | ???       |
| PIPN           | 2.9      | ???       | 0.1      | ???       |
| TC4H9NO3       | 6.4E-3   | ???       | 0.1      | ???       |
| EPXDLPAN       | 2.8      | ???       | 0.1      | ???       |
| MALDIALPAN     | 2.8      | ???       | 0.1      | ???       |
| NBZFUO2        | -9.99999 | ???       | -9.99999 | ???       |
| NBZFUONE       | 20.      | ???       | 0.1      | ???       |
| NBZFUOOH       | 2.4E4    | ???       | 0.1      | ???       |
| NC4DCO2H       | 6.6E7    | ???       | 0.1      | ???       |
| LBUT1ENO2      | -9.99999 | ???       | -9.99999 | ???       |
| LBUT1ENOOH     | 1.0E6    | ???       | 0.1      | ???       |
| LC4H9O2        | -9.99999 | ???       | -9.99999 | ???       |
| LC4H9OOH       | 1.1E2    | ???       | 0.1      | ???       |
| LHMKABO2       | -9.99999 | ???       | -9.99999 | ???       |
| LHMKABOOH      | 5.E6     | ???       | -9.99999 | ???       |
| LMEKO2         | -9.99999 | ???       | -9.99999 | ???       |
| LMEKOOH        | 1.E3     | ???       | 0.1      | ???       |
| LBUT1ENNO3     | 8.8E1    | ???       | 0.1      | ???       |
| LC4H9NO3       | 6.4E-3   | ???       | 0.1      | ???       |
| LMEKNO3        | 0.86E0   | ???       | 0.1      | ???       |
| C1ODC2O2C4OD   | -9.99999 | ???       | -9.99999 | ???       |
| C1ODC2O2C4OOH  | 1.0E6    | ???       | 0.1      | ???       |
| C1ODC2OOHC4OD  | 1.0E6    | ???       | 0.1      | ???       |
| C1ODC3O2C4OOH  | 1.0E6    | ???       | 0.1      | ???       |
| C1OOHC2O2C4OD  | -9.99999 | ???       | -9.99999 | ???       |
| C1OOHC2OOHC4OD | 1.0E6    | ???       | 0.1      | ???       |
| C1OOHC3O2C4OD  | -9.99999 | ???       | -9.99999 | ???       |
| C4MDIAL        | 1.0E6    | ???       | 0.1      | ???       |
| C511O2         | -9.99999 | ???       | -9.99999 | ???       |
| C511OOH        | 1.0E6    | ???       | 0.1      | ???       |
| C512O2         | -9.99999 | ???       | -9.99999 | ???       |
| C512OOH        | 1.0E6    | ???       | 0.1      | ???       |
| C513CO         | 1.0E6    | ???       | 0.1      | ???       |
| C513O2         | -9.99999 | ???       | -9.99999 | ???       |
| C513OOH        | 1.0E6    | ???       | 0.1      | ???       |
| C514O2         | -9.99999 | ???       | -9.99999 | ???       |
| C514OOH        | 1.0E6    | ???       | 0.1      | ???       |
| C59O2          | -9.99999 | ???       | -9.99999 | ???       |
| C59OOH         | 3.E11    | ???       | 0.1      | ???       |
| C5H8           | 0.01     | ???       | 0.0      | ???       |
| CHOC3COCO3     | -9.99999 | ???       | -9.99999 | ???       |
| CHOC3COOOH     | 1.0E6    | ???       | 0.1      | ???       |
| CO13C4CHO      | 1.0E6    | ???       | 0.1      | ???       |
| CO23C4CHO      | 1.0E6    | ???       | 0.1      | ???       |

| KPP name      | pss      | Reference | dryreac  | Reference |
|---------------|----------|-----------|----------|-----------|
| CO23C4CO3     | -9.99999 | ???       | -9.99999 | ???       |
| CO23C4CO3H    | 1.0E6    | ???       | 0.1      | ???       |
| DB1O          | -9.99999 | ???       | -9.99999 | ???       |
| DB1O2         | -9.99999 | ???       | -9.99999 | ???       |
| DB1OOH        | 1.0E6    | ???       | 0.1      | ???       |
| DB2O2         | -9.99999 | ???       | -9.99999 | ???       |
| DB2OOH        | 1.0E6    | ???       | 0.1      | ???       |
| HCOC5         | 4.7E2    | ???       | 0.1      | ???       |
| ISOPAB        | -9.99999 | ???       | -9.99999 | ???       |
| ISOPAOH       | 4.E6     | ???       | 0.1      | ???       |
| ISOPBO2       | -9.99999 | ???       | -9.99999 | ???       |
| ISOPBOH       | 3.E6     | ???       | 0.1      | ???       |
| ISOPBOOH      | 3.E6     | ???       | 0.1      | ???       |
| ISOPCD        | -9.99999 | ???       | -9.99999 | ???       |
| ISOPDO2       | -9.99999 | ???       | -9.99999 | ???       |
| ISOPDOH       | 3.E6     | ???       | 0.1      | ???       |
| ISOPDOOH      | 3.E6     | ???       | 0.1      | ???       |
| MBO           | 1.0E6    | ???       | 0.1      | ???       |
| MBOACO        | 1.0E6    | ???       | 0.1      | ???       |
| MBOCOCO       | 1.0E6    | ???       | 0.1      | ???       |
| ME3FURAN      | 1.0E6    | ???       | 0.1      | ???       |
| ZCO3C23DBCOD  | -9.99999 | ???       | -9.99999 | ???       |
| ZCODC23DBC00H | 1.0E6    | ???       | 0.1      | ???       |
| ACCOMMECHO    | 3.7E3    | ???       | 0.1      | ???       |
| ACCOMMECO3    | -9.99999 | ???       | 0.1      | ???       |
| ACCOMMECO3H   | 3.1E5    | ???       | 0.1      | ???       |
| C24O3CCO2H    | 7.4E5    | ???       | 0.1      | ???       |
| C4CO2DBC03    | -9.99999 | ???       | 0.1      | ???       |
| C4CO2DCO3H    | 2.0E6    | ???       | 0.1      | ???       |
| C5134CO2OH    | 3.1E5    | ???       | 0.1      | ???       |
| C54CO         | 3.6E5    | ???       | 0.1      | ???       |
| C5CO14O2      | -9.99999 | ???       | -9.99999 | ???       |
| C5CO14OH      | 2.2E3    | ???       | 0.1      | ???       |
| C5CO14OOH     | 3.1E5    | ???       | 0.1      | ???       |
| C5DIALCO      | 9.0E3    | ???       | 0.1      | ???       |
| C5DIALO2      | -9.99999 | ???       | -9.99999 | ???       |
| C5DIALOOH     | 3.6E5    | ???       | 0.1      | ???       |
| C5DICARB      | 3.7E3    | ???       | 0.1      | ???       |
| C5DICARBO2    | -9.99999 | ???       | -9.99999 | ???       |
| C5DICAROOH    | 2.0E6    | ???       | 0.1      | ???       |
| MC3ODBCO2H    | 6.6E7    | ???       | 0.1      | ???       |
| MMALANHY      | 20.      | ???       | 0.1      | ???       |
| MMALANHYO2    | -9.99999 | ???       | 0.1      | ???       |
| MMALNHYOOH    | 2.0E6    | ???       | 0.1      | ???       |
| TLFUO2        | -9.99999 | ???       | -9.99999 | ???       |
| TLFUONE       | 3.6E1    | ???       | 0.1      | ???       |
| TLFUOOH       | 2.0E6    | ???       | 0.1      | ???       |
| C4MCONO3OH    | 1.0E6    | ???       | 0.1      | ???       |
| C514NO3       | 1.0E6    | ???       | 0.1      | ???       |



| KPP name       | pss      | Reference | dryreac  | Reference |
|----------------|----------|-----------|----------|-----------|
| C5PAN9         | 1.0E6    | ???       | 0.1      | ???       |
| CHOC3COPAN     | 1.0E6    | ???       | 0.1      | ???       |
| DB1NO3         | 1.0E4    | ???       | 0.1      | ???       |
| ISOPBDNO3O2    | -9.99999 | ???       | -9.99999 | ???       |
| ISOPBNO3       | 8.9E3    | ???       | 0.1      | ???       |
| ISOPDNO3       | 8.9E3    | ???       | 0.1      | ???       |
| NC4CHO         | 9.6      | ???       | 0.1      | ???       |
| NC4OHCO3       | -9.99999 | ???       | -9.99999 | ???       |
| NC4OHCO3H      | 1.0E6    | ???       | 0.1      | ???       |
| NC4OHCPAN      | 1.0E6    | ???       | 0.1      | ???       |
| NISOPO2        | -9.99999 | ???       | -9.99999 | ???       |
| NISOPOOH       | 2.E4     | ???       | 0.1      | ???       |
| NMBOBCO        | 1.0E6    | ???       | 0.1      | ???       |
| ZCPANC23DBCOD  | 1.E1     | ???       | 0.1      | ???       |
| ACCOMEPAN      | 2.8      | ???       | 0.1      | ???       |
| C4CO2DBPAN     | 4.0E4    | ???       | 0.1      | ???       |
| C5COO2NO2      | 2.8      | ???       | 0.1      | ???       |
| NC4MDCO2H      | 6.6E7    | ???       | 0.1      | ???       |
| NTLFUO2        | -9.99999 | ???       | -9.99999 | ???       |
| NTLFUOOH       | 9.0E3    | ???       | 0.1      | ???       |
| LC578O2        | -9.99999 | ???       | -9.99999 | ???       |
| LC578OOH       | 3.E11    | ???       | 0.1      | ???       |
| LDISOPACO      | -9.99999 | ???       | -9.99999 | ???       |
| LDISOPACO2     | -9.99999 | ???       | -9.99999 | ???       |
| LHC4ACCHO      | 4.E5     | ???       | 0.1      | ???       |
| LHC4ACCO2H     | 6.6E7    | ???       | 0.1      | ???       |
| LHC4ACCO3      | -9.99999 | ???       | -9.99999 | ???       |
| LHC4ACCO3H     | 2.2E5    | ???       | 0.1      | ???       |
| LIEPOX         | 1.0E6    | ???       | 0.1      | ???       |
| LISOPACO       | -9.99999 | ???       | -9.99999 | ???       |
| LISOPACO2      | -9.99999 | ???       | -9.99999 | ???       |
| LISOPACOOH     | 4.E6     | ???       | 0.1      | ???       |
| LISOPEFO       | -9.99999 | ???       | -9.99999 | ???       |
| LISOPEFO2      | -9.99999 | ???       | -9.99999 | ???       |
| LMBOABO2       | -9.99999 | ???       | -9.99999 | ???       |
| LMBOABOOH      | 1.0E6    | ???       | 0.1      | ???       |
| LME3FURANO2    | -9.99999 | ???       | -9.99999 | ???       |
| LZCO3HC23DBCOD | 1.0E6    | ???       | 0.1      | ???       |
| LC5PAN1719     | 6.E4     | ???       | 0.1      | ???       |
| LISOPACNO3     | 2.E4     | ???       | 0.1      | ???       |
| LISOPACNO3O2   | -9.99999 | ???       | -9.99999 | ???       |
| LMBOABNO3      | 1.0E6    | ???       | 0.1      | ???       |
| LNISO3         | -9.99999 | ???       | -9.99999 | ???       |
| LNISOOH        | 6.E3     | ???       | 0.1      | ???       |
| LNMBOABO2      | -9.99999 | ???       | -9.99999 | ???       |
| LNMBOABOOH     | 1.0E6    | ???       | 0.1      | ???       |
| C614CO         | 1.0E6    | ???       | 0.1      | ???       |
| C614O2         | -9.99999 | ???       | -9.99999 | ???       |
| C614OOH        | 1.0E6    | ???       | 0.1      | ???       |

| KPP name   | pss      | Reference | dryreac  | Reference |
|------------|----------|-----------|----------|-----------|
| CO235C5CHO | -9.99999 | ???       | -9.99999 | ???       |
| CO235C6O2  | -9.99999 | ???       | -9.99999 | ???       |
| CO235C6OOH | 1.0E6    | ???       | 0.1      | ???       |
| BENZENE    | 1.8E-1   | ???       | 0.1      | ???       |
| BZBIPERO2  | -9.99999 | ???       | -9.99999 | ???       |
| BZBIPEROOH | 2.0E6    | ???       | 0.1      | ???       |
| BZEMUCCO   | 9.0E3    | ???       | 0.1      | ???       |
| BZEMUCCO2H | 6.6E7    | ???       | 0.1      | ???       |
| BZEMUCCO3  | -9.99999 | ???       | -9.99999 | ???       |
| BZEMUCCO3H | 9.0E3    | ???       | 0.1      | ???       |
| BZEMUCO2   | -9.99999 | ???       | -9.99999 | ???       |
| BZEMUCOOH  | 2.0E6    | ???       | 0.1      | ???       |
| BZEPOXMUC  | 3.6E5    | ???       | 0.1      | ???       |
| BZOBIPEROH | 9.0E3    | ???       | 0.1      | ???       |
| C5CO2DBCO3 | -9.99999 | ???       | 0.1      | ???       |
| C5CO2DCO3H | 2.0E6    | ???       | 0.1      | ???       |
| C5CO2OHCO3 | -9.99999 | ???       | 0.1      | ???       |
| C5COOHCO3H | 2.0E6    | ???       | 0.1      | ???       |
| C6125CO    | 3.7E3    | ???       | 0.1      | ???       |
| C615CO2O2  | -9.99999 | ???       | -9.99999 | ???       |
| C615CO2OOH | 3.1E5    | ???       | 0.1      | ???       |
| C6CO4DB    | 2.0E6    | ???       | 0.1      | ???       |
| C6H5O      | 2.9E3    | ???       | 0.1      | ???       |
| C6H5O2     | -9.99999 | ???       | -9.99999 | ???       |
| C6H5OOH    | 2.9E3    | ???       | 0.1      | ???       |
| CATEC1O    | 4.6E3    | ???       | 0.1      | ???       |
| CATEC1O2   | -9.99999 | ???       | -9.99999 | ???       |
| CATEC1OOH  | 4.6E3    | ???       | 0.1      | ???       |
| CATECHOL   | 4.6E3    | ???       | 0.1      | ???       |
| CPDKETENE  | -9.99999 | ???       | -9.99999 | ???       |
| PBZQCO     | 4.6E3    | ???       | 0.1      | ???       |
| PBZQO2     | -9.99999 | ???       | -9.99999 | ???       |
| PBZQONE    | 20.      | ???       | 0.1      | ???       |
| PBZQOOH    | 2.0E6    | ???       | 0.1      | ???       |
| PHENO2     | -9.99999 | ???       | -9.99999 | ???       |
| PHENOL     | 2.9E3    | ???       | 0.1      | ???       |
| PHENOOH    | 2.0E6    | ???       | 0.1      | ???       |
| C614NO3    | 1.0E6    | ???       | 0.1      | ???       |
| BZBIPERNO3 | 2.9E3    | ???       | 0.1      | ???       |
| BZEMUCNO3  | 4.0E4    | ???       | 0.1      | ???       |
| BZEMUCPAN  | 2.8      | ???       | 0.1      | ???       |
| C5CO2DBPAN | 3.7E3    | ???       | 0.1      | ???       |
| C5CO2OHPAN | 4.0E4    | ???       | 0.1      | ???       |
| DNPHEN     | 2.3E3    | ???       | 0.1      | ???       |
| DNPHEO2    | -9.99999 | ???       | -9.99999 | ???       |
| DNPHEOOH   | 2.3E3    | ???       | 0.1      | ???       |
| HOC6H4NO2  | 70.      | ???       | 0.1      | ???       |
| NBZQO2     | -9.99999 | ???       | -9.99999 | ???       |
| NBZQOOH    | 2.4E4    | ???       | 0.1      | ???       |

| KPP name   | pss      | Reference | dryreac  | Reference |
|------------|----------|-----------|----------|-----------|
| NCATECHOL  | 4.6E3    | ???       | 0.1      | ???       |
| NCATECO2   | -9.99999 | ???       | -9.99999 | ???       |
| NCATECOOH  | 2.0E6    | ???       | 0.1      | ???       |
| NCPDKETENE | -9.99999 | ???       | -9.99999 | ???       |
| NDNPHENO2  | -9.99999 | ???       | -9.99999 | ???       |
| NDNPHENOOH | 2.3E3    | ???       | 0.1      | ???       |
| NNCATECO2  | -9.99999 | ???       | -9.99999 | ???       |
| NNCATECOOH | 2.3E3    | ???       | 0.1      | ???       |
| NPHEN1O    | 70.      | ???       | 0.1      | ???       |
| NPHEN1O2   | -9.99999 | ???       | -9.99999 | ???       |
| NPHEN1OOH  | 70.      | ???       | 0.1      | ???       |
| NPHENO2    | -9.99999 | ???       | -9.99999 | ???       |
| NPHENOOH   | 4.6E3    | ???       | 0.1      | ???       |
| C235C6CO3H | 1.0E6    | ???       | 0.1      | ???       |
| C716O2     | -9.99999 | ???       | -9.99999 | ???       |
| C716OOH    | 1.0E6    | ???       | 0.1      | ???       |
| C721O2     | -9.99999 | ???       | -9.99999 | ???       |
| C721OOH    | 1.0E6    | ???       | 0.1      | ???       |
| C722O2     | -9.99999 | ???       | -9.99999 | ???       |
| C722OOH    | 1.0E6    | ???       | 0.1      | ???       |
| CO235C6CHO | 1.0E6    | ???       | 0.1      | ???       |
| CO235C6CO3 | -9.99999 | ???       | -9.99999 | ???       |
| MCPDKETENE | -9.99999 | ???       | -9.99999 | ???       |
| ROO6R3O    | -9.99999 | ???       | -9.99999 | ???       |
| ROO6R3O2   | -9.99999 | ???       | -9.99999 | ???       |
| ROO6R5O2   | -9.99999 | ???       | -9.99999 | ???       |
| BENZAL     | 36.      | ???       | 0.1      | ???       |
| C6CO2OHCO3 | -9.99999 | ???       | -9.99999 | ???       |
| C6COOHCO3H | 2.0E6    | ???       | 0.1      | ???       |
| C6H5CH2O2  | -9.99999 | ???       | -9.99999 | ???       |
| C6H5CH2OOH | 2.9E3    | ???       | 0.1      | ???       |
| C6H5CO3    | -9.99999 | ???       | -9.99999 | ???       |
| C6H5CO3H   | 2.4E4    | ???       | 0.1      | ???       |
| C7CO4DB    | 3.7E3    | ???       | 0.1      | ???       |
| CRESO2     | -9.99999 | ???       | -9.99999 | ???       |
| CRESOL     | 2.9E3    | ???       | 0.1      | ???       |
| CRESOOH    | 2.0E6    | ???       | 0.1      | ???       |
| MCATEC1O   | 2.0E6    | ???       | 0.1      | ???       |
| MCATEC1O2  | -9.99999 | ???       | -9.99999 | ???       |
| MCATEC1OOH | 4.6E3    | ???       | 0.1      | ???       |
| MCATECHOL  | 4.6E3    | ???       | 0.1      | ???       |
| OXYL1O2    | -9.99999 | ???       | -9.99999 | ???       |
| OXYL1OOH   | 2.9E3    | ???       | 0.1      | ???       |
| PHCOOH     | 1.5E7    | ???       | 0.1      | ???       |
| PTLQCO     | 2.4E4    | ???       | 0.1      | ???       |
| PTLQO2     | -9.99999 | ???       | -9.99999 | ???       |
| PTLQONE    | 41.      | ???       | 0.1      | ???       |
| PTLQOOH    | 2.0E6    | ???       | 0.1      | ???       |
| TLBIPERO2  | -9.99999 | ???       | -9.99999 | ???       |

| KPP name    | pss      | Reference | dryreac  | Reference |
|-------------|----------|-----------|----------|-----------|
| TLBIPEROOH  | 2.0E6    | ???       | 0.1      | ???       |
| TLEMUCCO    | 3.1E5    | ???       | 0.1      | ???       |
| TLEMUCCO2H  | 7.4E5    | ???       | 0.1      | ???       |
| TLEMUCCO3   | -9.99999 | ???       | -9.99999 | ???       |
| TLEMUCCO3H  | 2.2E3    | ???       | 0.1      | ???       |
| TLEMUCO2    | -9.99999 | ???       | -9.99999 | ???       |
| TLEMUCOOH   | 2.0E6    | ???       | 0.1      | ???       |
| TLEPOXMUC   | 41.      | ???       | 0.1      | ???       |
| TLOBIPEROH  | 4.0E4    | ???       | 0.1      | ???       |
| TOL1O       | 2.9E3    | ???       | 0.1      | ???       |
| TOLUENE     | 1.5E-1   | ???       | 0.1      | ???       |
| C7PAN3      | 1.0E6    | ???       | 0.1      | ???       |
| C6CO2OHPAN  | 4.0E4    | ???       | 0.1      | ???       |
| C6H5CH2NO3  | 36.      | ???       | 0.1      | ???       |
| DNCRES      | 2.3E3    | ???       | 0.1      | ???       |
| DNCRESO2    | -9.99999 | ???       | -9.99999 | ???       |
| DNCRESOOH   | 2.3E3    | ???       | 0.1      | ???       |
| MNCATECH    | 4.6E3    | ???       | 0.1      | ???       |
| MNCATECO2   | -9.99999 | ???       | -9.99999 | ???       |
| MNCATECOOH  | 2.0E6    | ???       | 0.1      | ???       |
| MNCPDKETENE | -9.99999 | ???       | -9.99999 | ???       |
| MNNCATCOOH  | 2.3E3    | ???       | 0.1      | ???       |
| MNNCATECO2  | -9.99999 | ???       | -9.99999 | ???       |
| NCRES1O     | 70.      | ???       | 0.1      | ???       |
| NCRES1O2    | -9.99999 | ???       | -9.99999 | ???       |
| NCRES1OOH   | 70.      | ???       | 0.1      | ???       |
| NCRESO2     | -9.99999 | ???       | -9.99999 | ???       |
| NCRESOOH    | 4.6E3    | ???       | 0.1      | ???       |
| NDNCRESO2   | -9.99999 | ???       | -9.99999 | ???       |
| NDNCRESOOH  | 2.3E3    | ???       | 0.1      | ???       |
| NPTLQO2     | -9.99999 | ???       | -9.99999 | ???       |
| NPTLQOOH    | 2.4E4    | ???       | 0.1      | ???       |
| PBZN        | 70.      | ???       | 0.1      | ???       |
| TLBIPERNO3  | 70.      | ???       | 0.1      | ???       |
| TLEMUCNO3   | 4.0E4    | ???       | 0.1      | ???       |
| TLEMUCPAN   | 2.8      | ???       | 0.1      | ???       |
| TOL1OHNO2   | 7.0E1    | ???       | 0.1      | ???       |
| C721CHO     | 1.0E6    | ???       | 0.1      | ???       |
| C721CO3     | -9.99999 | ???       | -9.99999 | ???       |
| C721CO3H    | 1.0E6    | ???       | 0.1      | ???       |
| C810O2      | -9.99999 | ???       | -9.99999 | ???       |
| C810OOH     | 1.0E6    | ???       | 0.1      | ???       |
| C811O2      | -9.99999 | ???       | -9.99999 | ???       |
| C812O2      | -9.99999 | ???       | -9.99999 | ???       |
| C812OOH     | 1.0E6    | ???       | 0.1      | ???       |
| C813O2      | -9.99999 | ???       | -9.99999 | ???       |
| C813OOH     | 1.0E6    | ???       | 0.1      | ???       |
| C85O2       | -9.99999 | ???       | -9.99999 | ???       |
| C85OOH      | 1.0E6    | ???       | 0.1      | ???       |

| KPP name   | pss      | Reference | dryreac  | Reference |
|------------|----------|-----------|----------|-----------|
| C86O2      | -9.99999 | ???       | -9.99999 | ???       |
| C86OOH     | 1.0E6    | ???       | 0.1      | ???       |
| C89O2      | -9.99999 | ???       | -9.99999 | ???       |
| C89OOH     | 1.0E6    | ???       | 0.1      | ???       |
| C8BC       | 1.0E6    | ???       | 0.1      | ???       |
| C8BCCO     | 1.0E6    | ???       | 0.1      | ???       |
| C8BCO2     | -9.99999 | ???       | -9.99999 | ???       |
| C8BCOOH    | 1.0E6    | ???       | 0.1      | ???       |
| NORPINIC   | 4E13     | ???       | 0.1      | ???       |
| EBENZ      | 1.2E-1   | ???       | 0.1      | ???       |
| LXYL       | 1.7E-1   | ???       | 0.1      | ???       |
| STYRENE    | 3.7E-1   | ???       | 0.1      | ???       |
| STYRENO2   | -9.99999 | ???       | -9.99999 | ???       |
| STYRENOOH  | 70.      | ???       | 0.1      | ???       |
| C721PAN    | 1.0E6    | ???       | 0.1      | ???       |
| C810NO3    | 1.0E6    | ???       | 0.1      | ???       |
| C89NO3     | 1.0E6    | ???       | 0.1      | ???       |
| C8BCNO3    | 1.0E6    | ???       | 0.1      | ???       |
| NSTYRENO2  | -9.99999 | ???       | -9.99999 | ???       |
| NSTYRENOOH | 70.      | ???       | 0.1      | ???       |
| C811CO3    | -9.99999 | ???       | -9.99999 | ???       |
| C811CO3H   | 1.0E6    | ???       | 0.1      | ???       |
| C85CO3     | -9.99999 | ???       | -9.99999 | ???       |
| C85CO3H    | 1.0E6    | ???       | 0.1      | ???       |
| C89CO2H    | 6.6E7    | ???       | 0.1      | ???       |
| C89CO3     | -9.99999 | ???       | -9.99999 | ???       |
| C89CO3H    | 1.0E6    | ???       | 0.1      | ???       |
| C96O2      | -9.99999 | ???       | -9.99999 | ???       |
| C96OOH     | 1.0E6    | ???       | 0.1      | ???       |
| C97O2      | -9.99999 | ???       | -9.99999 | ???       |
| C97OOH     | 1.0E6    | ???       | 0.1      | ???       |
| C98O2      | -9.99999 | ???       | -9.99999 | ???       |
| C98OOH     | 1.0E6    | ???       | 0.1      | ???       |
| NOPINDCO   | 1.0E6    | ???       | 0.1      | ???       |
| NOPINDO2   | -9.99999 | ???       | -9.99999 | ???       |
| NOPINDOOH  | 1.0E6    | ???       | 0.1      | ???       |
| NOPINONE   | 1.0E6    | ???       | 0.1      | ???       |
| NOPINOO    | 1.0E6    | ???       | 0.1      | ???       |
| NORPINAL   | 1.0E6    | ???       | 0.1      | ???       |
| NORPINENOL | 1.0E6    | ???       | 0.1      | ???       |
| PINIC      | 4E13     | ???       | 0.1      | ???       |
| RO6R3P     | 1.0E6    | ???       | 0.1      | ???       |
| C811PAN    | 1.0E6    | ???       | 0.1      | ???       |
| C89PAN     | 1.0E6    | ???       | 0.1      | ???       |
| C96NO3     | 1.0E6    | ???       | 0.1      | ???       |
| C9PAN2     | 1.0E6    | ???       | 0.1      | ???       |
| LTMB       | 2.2E-1   | ???       | 0.1      | ???       |
| APINAOO    | -9.99999 | ???       | -9.99999 | ???       |
| APINBOO    | -9.99999 | ???       | -9.99999 | ???       |

| KPP name        | pss      | Reference | dryreac  | Reference |
|-----------------|----------|-----------|----------|-----------|
| APINENE         | 1.0E1    | ???       | 0.1      | ???       |
| BPINAO2         | -9.99999 | ???       | -9.99999 | ???       |
| BPINAOOH        | 1.0E6    | ???       | 0.1      | ???       |
| BPINENE         | 1.0E1    | ???       | 0.1      | ???       |
| C106O2          | -9.99999 | ???       | -9.99999 | ???       |
| C106OOH         | 1.0E6    | ???       | 0.1      | ???       |
| C109CO          | 1.0E6    | ???       | 0.1      | ???       |
| C109O2          | -9.99999 | ???       | -9.99999 | ???       |
| C109OOH         | 1.0E6    | ???       | 0.1      | ???       |
| C96CO3          | -9.99999 | ???       | -9.99999 | ???       |
| CAMPHENE        | 1.0E1    | ???       | 0.1      | ???       |
| CARENE          | 1.0E1    | ???       | 0.1      | ???       |
| MENTHEN6ONE     | 1.0E6    | ???       | 0.1      | ???       |
| OH2MENTHEN6ONE  | 1.0E6    | ???       | 0.1      | ???       |
| OHMENTHEN6ONEO2 | -9.99999 | ???       | -9.99999 | ???       |
| PERPINONIC      | 7.4E5    | ???       | 0.1      | ???       |
| PINAL           | 1.0E6    | ???       | 0.1      | ???       |
| PINALO2         | -9.99999 | ???       | -9.99999 | ???       |
| PINALOOH        | 1.0E6    | ???       | 0.1      | ???       |
| PINENOL         | 1.0E6    | ???       | 0.1      | ???       |
| PINONIC         | 7.4E5    | ???       | 0.1      | ???       |
| RO6R1O2         | -9.99999 | ???       | -9.99999 | ???       |
| RO6R3O2         | -9.99999 | ???       | -9.99999 | ???       |
| RO6R3OOH        | 1.0E6    | ???       | 0.1      | ???       |
| ROO6R1O2        | -9.99999 | ???       | -9.99999 | ???       |
| SABINENE        | 1.0E1    | ???       | 0.1      | ???       |
| BPINANO3        | 1.0E6    | ???       | 0.1      | ???       |
| C106NO3         | 1.0E6    | ???       | 0.1      | ???       |
| C10PAN2         | 1.0E6    | ???       | 0.1      | ???       |
| PINALNO3        | 1.0E6    | ???       | 0.1      | ???       |
| RO6R1NO3        | 1.0E6    | ???       | 0.1      | ???       |
| RO6R3NO3        | 1.0E6    | ???       | 0.1      | ???       |
| ROO6R1NO3       | 1.0E6    | ???       | 0.1      | ???       |
| LAPINABNO3      | 1.0E6    | ???       | 0.1      | ???       |
| LAPINABO2       | -9.99999 | ???       | -9.99999 | ???       |
| LAPINABOOH      | 1.0E6    | ???       | 0.1      | ???       |
| LNAPINABO2      | -9.99999 | ???       | -9.99999 | ???       |
| LNAPINABOOH     | 1.0E6    | ???       | 0.1      | ???       |
| LNBPINABO2      | -9.99999 | ???       | -9.99999 | ???       |
| LNBPINABOOH     | 1.0E6    | ???       | 0.1      | ???       |
| LHAROM          | 1.2E-1   | ???       | 0.1      | ???       |
| CHF3            | -9.99999 | ???       | -9.99999 | ???       |
| CHF2CF3         | -9.99999 | ???       | -9.99999 | ???       |
| CH3CF3          | -9.99999 | ???       | -9.99999 | ???       |
| CH2F2           | -9.99999 | ???       | -9.99999 | ???       |
| CH3CHF2         | -9.99999 | ???       | -9.99999 | ???       |
| CCl4            | -9.99999 | ???       | -9.99999 | ???       |
| CF2Cl2          | -9.99999 | ???       | -9.99999 | ???       |
| CF2ClCF2Cl      | -9.99999 | ???       | -9.99999 | ???       |

| KPP name   | pss      | Reference | dryreac  | Reference |
|------------|----------|-----------|----------|-----------|
| CF2ClCFC12 | -9.99999 | ???       | -9.99999 | ???       |
| CF3CF2Cl   | -9.99999 | ???       | -9.99999 | ???       |
| CFC13      | -9.99999 | ???       | -9.99999 | ???       |
| CH2Cl2     | -9.99999 | ???       | -9.99999 | ???       |
| CH2FCF3    | -9.99999 | ???       | -9.99999 | ???       |
| CH3CCl3    | -9.99999 | ???       | -9.99999 | ???       |
| CH3CFC12   | -9.99999 | ???       | -9.99999 | ???       |
| CH3Cl      | 9.4E-2   | ???       | 0.0      | ???       |
| CHCl3      | -9.99999 | ???       | -9.99999 | ???       |
| CHF2Cl     | -9.99999 | ???       | -9.99999 | ???       |
| Cl         | -9.99999 | ???       | -9.99999 | ???       |
| Cl2        | 7.E-2    | ???       | 0.1      | ???       |
| Cl2O2      | -9.99999 | ???       | -9.99999 | ???       |
| ClNO2      | -9.99999 | ???       | -9.99999 | ???       |
| ClNO3      | 1.E30    | ???       | 1.0      | ???       |
| ClO        | -9.99999 | ???       | -9.99999 | ???       |
| HCl        | 1E14     | ???       | 1.0      | ???       |
| HOCl       | 6.7E2    | ???       | 1.0      | ???       |
| OC1O       | -9.99999 | ???       | -9.99999 | ???       |
| LCHLORINE  | -9.99999 | ???       | -9.99999 | ???       |
| Br         | -9.99999 | ???       | -9.99999 | ???       |
| Br2        | 0.7      | ???       | 0.1      | ???       |
| BrCl       | 1.0      | ???       | 0.1      | ???       |
| BrNO2      | -9.99999 | ???       | -9.99999 | ???       |
| BrNO3      | 1.0E30   | ???       | 1.0      | ???       |
| BrO        | -9.99999 | ???       | -9.99999 | ???       |
| CF2ClBr    | -9.99999 | ???       | -9.99999 | ???       |
| CF3Br      | -9.99999 | ???       | -9.99999 | ???       |
| CH2Br2     | 1.1      | ???       | 0.0      | ???       |
| CH2ClBr    | 1.1      | ???       | 0.0      | ???       |
| CH3Br      | 1.6E-1   | ???       | 0.0      | ???       |
| CHBr3      | 1.7      | ???       | 0.0      | ???       |
| CHCl2Br    | 4.0E-1   | ???       | 0.0      | ???       |
| CHClBr2    | 8.7E-1   | ???       | 0.0      | ???       |
| HBr        | 1.3E17   | ???       | 1.0      | ???       |
| HOBr       | 9.1E1    | ???       | 1.0      | ???       |
| LBROMINE   | -9.99999 | ???       | -9.99999 | ???       |
| C3H7I      | -9.99999 | ???       | -9.99999 | ???       |
| CH2CI      | 2.4E1    | ???       | 0.1      | ???       |
| CH2I2      | -9.99999 | ???       | -9.99999 | ???       |
| CH3I       | -9.99999 | ???       | -9.99999 | ???       |
| HI         | 1.E30    | ???       | 1.0      | ???       |
| HIO3       | 1.E30    | ???       | 1.0      | ???       |
| HOI        | 1.E30    | ???       | 1.0      | ???       |
| I          | -9.99999 | ???       | -9.99999 | ???       |
| I2         | 3.0      | ???       | 0.1      | ???       |
| I2O2       | 0.0      | ???       | 0.0      | ???       |
| IBr        | 0.0      | ???       | 0.0      | ???       |
| ICl        | 1.1E2    | ???       | 0.1      | ???       |

| KPP name   | pss      | Reference | dryreac  | Reference |
|------------|----------|-----------|----------|-----------|
| INO2       | 4.5      | ???       | 0.1      | ???       |
| INO3       | 1.E30    | ???       | 1.0      | ???       |
| IO         | 0.0      | ???       | 0.0      | ???       |
| IPART      | -9.99999 | ???       | -9.99999 | ???       |
| OIO        | 0.0      | ???       | 0.0      | ???       |
| CH3SO2     | -9.99999 | ???       | -9.99999 | ???       |
| CH3SO3     | -9.99999 | ???       | -9.99999 | ???       |
| CH3SO3H    | 1.E30    | ???       | 1.0      | ???       |
| DMS        | 0.0      | ???       | 0.0      | ???       |
| DMSO       | 5.E4     | ???       | 0.1      | ???       |
| H2SO4      | 1.3E15   | ???       | 1.0      | ???       |
| OCS        | -9.99999 | ???       | -9.99999 | ???       |
| S          | -9.99999 | ???       | -9.99999 | ???       |
| SF6        | -9.99999 | ???       | -9.99999 | ???       |
| SH         | -9.99999 | ???       | -9.99999 | ???       |
| SO         | -9.99999 | ???       | -9.99999 | ???       |
| SO2        | 2.45E5   | ???       | 0.0      | ???       |
| SO3        | -9.99999 | ???       | -9.99999 | ???       |
| LSULFUR    | -9.99999 | ???       | -9.99999 | ???       |
| Hg         | 0.13     | ???       | 0.1      | ???       |
| HgO        | 2.4E7    | ???       | 1.0      | ???       |
| HgCl       | 2.4E7    | ???       | 1.0      | ???       |
| HgCl2      | 2.4E7    | ???       | 1.0      | ???       |
| HgBr       | 2.4E7    | ???       | 1.0      | ???       |
| HgBr2      | 2.4E7    | ???       | 1.0      | ???       |
| ClHgBr     | 2.4E7    | ???       | 1.0      | ???       |
| BrHgOBr    | 2.4E7    | ???       | 1.0      | ???       |
| ClHgOBr    | 2.4E7    | ???       | 1.0      | ???       |
| LTERP      | 4.9E-2   | ???       | 0.0      | ???       |
| LALK4      | 7.7E-4   | ???       | 0.0      | ???       |
| LALK5      | 2.5E-4   | ???       | 0.0      | ???       |
| LARO1      | 1.4E-1   | ???       | 0.0      | ???       |
| LARO2      | 1.4E-1   | ???       | 0.0      | ???       |
| LOLE1      | 5.0E-3   | ???       | 0.0      | ???       |
| LOLE2      | 5.0E-3   | ???       | 0.0      | ???       |
| LfPOG02    | 1.0E5    | ???       | 0.0      | ???       |
| LfPOG03    | 1.0E5    | ???       | 0.0      | ???       |
| LfPOG04    | 1.0E5    | ???       | 0.0      | ???       |
| LfPOG05    | 1.0E5    | ???       | 0.0      | ???       |
| LbbPOG02   | 1.0E5    | ???       | 0.0      | ???       |
| LbbPOG03   | 1.0E5    | ???       | 0.0      | ???       |
| LbbPOG04   | 1.0E5    | ???       | 0.0      | ???       |
| LfSOGsv01  | 1.0E5    | ???       | 0.0      | ???       |
| LfSOGsv02  | 1.0E5    | ???       | 0.0      | ???       |
| LbbSOGsv01 | 1.0E5    | ???       | 0.0      | ???       |
| LbbSOGsv02 | 1.0E5    | ???       | 0.0      | ???       |
| LfSOGiv01  | 1.0E5    | ???       | 0.0      | ???       |
| LfSOGiv02  | 1.0E5    | ???       | 0.0      | ???       |
| LfSOGiv03  | 1.0E5    | ???       | 0.0      | ???       |



| KPP name   | pss      | Reference | dryreac  | Reference |
|------------|----------|-----------|----------|-----------|
| LfSOGiv04  | 1.0E5    | ???       | 0.0      | ???       |
| LbbSOGiv01 | 1.0E5    | ???       | 0.0      | ???       |
| LbbSOGiv02 | 1.0E5    | ???       | 0.0      | ???       |
| LbbSOGiv03 | 1.0E5    | ???       | 0.0      | ???       |
| LbSOGv01   | 1.0E5    | ???       | 0.0      | ???       |
| LbSOGv02   | 1.0E5    | ???       | 0.0      | ???       |
| LbSOGv03   | 1.0E5    | ???       | 0.0      | ???       |
| LbSOGv04   | 1.0E5    | ???       | 0.0      | ???       |
| LbOSOGv01  | 1.0E5    | ???       | 0.0      | ???       |
| LbOSOGv02  | 1.0E5    | ???       | 0.0      | ???       |
| LbOSOGv03  | 1.0E5    | ???       | 0.0      | ???       |
| LaSOGv01   | 1.0E5    | ???       | 0.0      | ???       |
| LaSOGv02   | 1.0E5    | ???       | 0.0      | ???       |
| LaSOGv03   | 1.0E5    | ???       | 0.0      | ???       |
| LaSOGv04   | 1.0E5    | ???       | 0.0      | ???       |
| LaOSOGv01  | 1.0E5    | ???       | 0.0      | ???       |
| LaOSOGv02  | 1.0E5    | ???       | 0.0      | ???       |
| LaOSOGv03  | 1.0E5    | ???       | 0.0      | ???       |
| ISO2       | -9.99999 | ???       | -9.99999 | ???       |
| ISON       | 1.7E4    | ???       | 0.1      | ???       |
| ISOOH      | 1.7E6    | ???       | 0.1      | ???       |
| LHOC3H6O2  | -9.99999 | ???       | -9.99999 | ???       |
| LHOC3H6OOH | -9.99999 | ???       | -9.99999 | ???       |
| MVKO2      | -9.99999 | ???       | -9.99999 | ???       |
| MVKOOH     | -9.99999 | ???       | -9.99999 | ???       |
| NACA       | -9.99999 | ???       | -9.99999 | ???       |
| ONE        | -9.99999 | ???       | -9.99999 | ???       |
| O          | -9.99999 | ???       | -9.99999 | ???       |
| C          | -9.99999 | ???       | -9.99999 | ???       |
| OXL        | 3.26E6   | ???       | 0.1      | ???       |

## Notes

### Henry's law constants

- BIG\_DP is a large number that represents infinite solubility in the code.
- The temperature dependence of the Henry constants is:

$$K_H = K_H^\ominus \times \exp\left(\frac{-\Delta_{\text{soln}}H}{R} \left(\frac{1}{T} - \frac{1}{T^\ominus}\right)\right)$$

where  $\Delta_{\text{soln}}H$  = molar enthalpy of dissolution [J/mol] and  $R = 8.314$  J/(mol K).

- **HNO3**: Calculated using the acidity constant from Davis and de Bruin (1964).
- **CH3O2**: This value was estimated by Jacob (1986).
- **C2H5O2**: Assumed to be the same as for CH3O2.
- **HBr**: Calculated using the acidity constant from Lax (1969).
- **HOBr**: Twice the value of HOCl, according to Blatchley et al. (1992). Same temperature dependence as for HOCl assumed.
- **IO**: Assumed to be the same as for HOI.
- **HOI**: Lower limit.
- **ICl**: Calculated using thermodynamic data from Wagman et al. (1982).
- **IBr**: Calculated using thermodynamic data from Wagman et al. (1982).
- **H2SO4**: To account for the very high Henry's law coefficient of H2SO4, a very high value was chosen arbitrarily.
- **DMSO**: Lower limit cited from another reference.
- **HgCl**: Assumed to be the same as for HgCl2.
- **HgBr**: Assumed to be the same as for HgCl2.
- **HgBr2**: Assumed to be the same as for HgCl2.
- **ClHgBr**: Assumed to be the same as for HgCl2.
- **BrHgOBr**: Assumed to be the same as for HgCl2.
- **ClHgOBr**: Assumed to be the same as for HgCl2.

### Accommodation coefficients

- If the accommodation coefficient is not known, a value of  $\alpha = 0.1$  is assumed.

- The temperature dependence of the accommodation coefficients is given by (Jayne et al., 1991):

$$\begin{aligned}\frac{\alpha}{1-\alpha} &= \exp\left(\frac{-\Delta_{\text{obs}}G}{RT}\right) \\ &= \exp\left(\frac{-\Delta_{\text{obs}}H}{RT} + \frac{\Delta_{\text{obs}}S}{R}\right)\end{aligned}$$

where  $\Delta_{\text{obs}}G$  is the Gibbs free energy barrier of the transition state toward solution (Jayne et al., 1991), and  $\Delta_{\text{obs}}H$  and  $\Delta_{\text{obs}}S$  are the corresponding enthalpy and entropy, respectively. The equation can be rearranged to:

$$\ln\left(\frac{\alpha}{1-\alpha}\right) = \frac{-\Delta_{\text{obs}}H}{R} \times \frac{1}{T} + \frac{-\Delta_{\text{obs}}S}{R}$$

and further:

$$d \ln\left(\frac{\alpha}{1-\alpha}\right) / d\left(\frac{1}{T}\right) = \frac{-\Delta_{\text{obs}}H}{R}$$

- **O2:** Estimate.
- **O3:** Value measured at 292 K.
- **OH:** Value measured at 293 K.
- **HO2:** Value for aqueous salts at 293 K.
- **NH3:** Value measured at 295 K.
- **NO:** Value measured between 193 and 243 K.
- **NO2:** Value measured at 298 K.
- **NO3:** Value is a lower limit, measured at 273 K.
- **N2O5:** Value for sulfuric acid, measured between 195 and 300 K.
- **HONO:** Value measured between 247 and 297 K.
- **HNO3:** Value measured at room temperature. Abbatt and Waschewsky (1998) say  $\gamma > 0.2$ . Here  $\alpha = 0.5$  is used.
- **HNO4:** Value measured at 200 K for water ice.
- **CH3O2:** Estimate.
- **CO2:** Estimate.
- **HCHO:** Value measured between 260 and 270 K.
- **PAN:** Estimate.
- **C2H5O2:** Estimate.
- **CH3CHO:** Using the same estimate as in the CAPRAM 2.4 model (Ervens et al., 2003).
- **HCl:** Temperature dependence derived from published data at 2 different temperatures

- **HOCl:** Assumed to be the same as  $\alpha(\text{HOBr})$ .
- **ClNO<sub>3</sub>:** Value measured at 274.5 K.
- **HBr:** Temperature dependence derived from published data at 2 different temperatures
- **HOBr:** Value measured at room temperature. Abbatt and Waschewsky (1998) say  $\gamma > 0.2$ . Here  $\alpha = 0.5$  is used.
- **BrNO<sub>3</sub>:** Value measured at 273 K.
- **BrCl:** Assumed to be the same as  $\alpha(\text{Cl}_2)$ .
- **I<sub>2</sub>:** Estimate.
- **IO:** Estimate.
- **OIO:** Estimate.
- **I<sub>2</sub>O<sub>2</sub>:** Estimate.
- **HI:** Temperature dependence derived from published data at 2 different temperatures
- **HOI:** Assumed to be the same as  $\alpha(\text{HOBr})$ . See also Mössinger and Cox (2001) and Holmes et al. (2001).
- **HIO<sub>3</sub>:** Estimate.
- **INO<sub>2</sub>:** Estimate.
- **INO<sub>3</sub>:** Estimate.
- **ICl:** Estimate.
- **IBr:** Assumed to be the same as  $\alpha(\text{ICl})$ .
- **H<sub>2</sub>SO<sub>4</sub>:** Value measured at 303 K.
- **Hg:** Estimate.
- **HgO:** Estimate.
- **HgCl<sub>2</sub>:** Estimate.
- **HgBr<sub>2</sub>:** Estimate.
- **ClHgBr:** Estimate.
- **BrHgOBr:** Estimate.
- **ClHgOBr:** Estimate.

### Acid/base constants

- **pinic acid:** The same  $R_K\text{acid}$  and  $R_K\text{acid2}$  values as for succinic acid from Haynes (2014) are used.
- **norpinic acid:** The same  $R_K\text{acid}$  and  $R_K\text{acid2}$  values as for succinic acid from Haynes (2014) are used.
- **H<sub>2</sub>SO<sub>4</sub>:** From Wikipedia.

## References

- Abbatt, J. P. D. and Waschewsky, G. C. G.: Heterogeneous interactions of HOBr, HNO<sub>3</sub>, O<sub>3</sub>, and NO<sub>2</sub> with deliquescent NaCl aerosols at room temperature, *J. Phys. Chem. A*, 102, 3719–3725, doi:10.1021/JP980932D, 1998.
- Abraham, M. H.: Thermodynamics of solution of homologous series of solutes in water, *J. Chem. Soc. Faraday Trans. 1*, 80, 153–181, doi:10.1039/F19848000153, 1984.
- Andersson, M. E., Gårdfeldt, K., Wängberg, I., and Strömberg, D.: Determination of Henry’s law constant for elemental mercury, *Chemosphere*, 73, 587–592, doi:10.1016/J.CHEMOSPHERE.2008.05.067, 2008.
- Bartlett, W. P. and Margerum, D. W.: Temperature dependencies of the Henry’s law constant and the aqueous phase dissociation constant of bromine chloride, *Environ. Sci. Technol.*, 33, 3410–3414, doi:10.1021/ES990300K, 1999.
- Berdnikov, V. M. and Bazhin, N. M.: Oxidation-reduction potentials of certain inorganic radicals in aqueous solutions, *Russ. J. Phys. Chem., Engl. Transl.*, 44, 395–398, 1970.
- Betterton, E. A. and Hoffmann, M. R.: Henry’s law constants of some environmentally important aldehydes, *Environ. Sci. Technol.*, 22, 1415–1418, doi:10.1021/ES00177A004, 1988.
- Blatchley, III, E. R., Johnson, R. W., Alleman, J. E., and McCoy, W. F.: Effective Henry’s law constants for free chlorine and free bromine, *Wat. Res.*, 26, 99–106, doi:10.1016/0043-1354(92)90117-M, 1992.
- Braban, C. F., Adams, J. W., Rodriguez, D., Cox, R. A., Crowley, J. N., and Schuster, G.: Heterogeneous reactions of HOI, ICl and IBr on sea salt and sea salt proxies, *Phys. Chem. Chem. Phys.*, 9, 3136–3148, doi:10.1039/B700829E, 2007.
- Brimblecombe, P. and Clegg, S. L.: Erratum, *J. Atmos. Chem.*, 8, 95, doi:10.1007/BF00053818, 1989.
- Brimblecombe, P., Clegg, S. L., and Khan, I.: Thermodynamic properties of carboxylic acids relevant to their solubility in aqueous solutions, *J. Aerosol Sci.*, 23, S901–S904, doi:10.1016/0021-8502(92)90557-C, 1992.
- Burkholder, J. B., Sander, S. P., Abbatt, J., Barker, J. R., Huie, R. E., Kolb, C. E., Kurylo, M. J., Orkin, V. L., Wilmouth, D. M., and Wine, P. H.: Chemical Kinetics and Photochemical Data for Use in Atmospheric Studies, Evaluation No. 18, JPL Publication 15-10, Jet Propulsion Laboratory, Pasadena, <http://jpldataeval.jpl.nasa.gov>, 2015.
- Chatfield, R. B. and Crutzen, P. J.: Are there interactions of iodine and sulfur species in marine air photochemistry?, *J. Geophys. Res.*, 95D, 22 319–22 341, doi:10.1029/JD095ID13P22319, 1990.
- Davidovits, P., Hu, J. H., Worsnop, D. R., Zahniser, M. S., and Kolb, C. E.: Entry of gas molecules into liquids, *Faraday Discuss.*, 100, 65–81, doi:10.1039/FD9950000065, 1995.
- Davis, Jr., W. and de Bruin, H. J.: New activity coefficients of 0-100 per cent aqueous nitric acid, *J. Inorg. Nucl. Chem.*, 26, 1069–1083, doi:10.1016/0022-1902(64)80268-2, 1964.
- De Bruyn, W. J., Shorter, J. A., Davidovits, P., Worsnop, D. R., Zahniser, M. S., and Kolb, C. E.: Uptake of gas-phase sulfur species methanesulfonic acid, dimethylsulfoxide, and dimethyl sulfone by aqueous surfaces, *J. Geophys. Res.*, 99D, 16 927–16 932, doi:10.1029/94JD00684, 1994.
- Deiber, G., George, C., Le Calvé, S., Schweitzer, F., and Mirabel, P.: Uptake study of ClONO<sub>2</sub> and BrONO<sub>2</sub> by halide containing droplets, *Atmos. Chem. Phys.*, 4, 1291–1299, doi:10.5194/ACP-4-1291-2004, 2004.

- DeMore, W. B., Sander, S. P., Golden, D. M., Hampson, R. F., Kurylo, M. J., Howard, C. J., Ravishankara, A. R., Kolb, C. E., and Molina, M. J.: Chemical kinetics and photochemical data for use in stratospheric modeling. Evaluation number 12, JPL Publication 97-4, Jet Propulsion Laboratory, Pasadena, CA, 1997.
- Dong, H., Du, H., and Qian, X.: Theoretical prediction of pKa values for methacrylic acid oligomers using combined quantum mechanical and continuum solvation methods, *J. Phys. Chem. A*, 112, 12 687–12 694, doi:10.1021/jp807315p, 2008.
- Ervens, B., George, C., Williams, J. E., Buxton, G. V., Salmon, G. A., Bydder, M., Wilkinson, F., Dentener, F., Mirabel, P., Wolke, R., and Herrmann, H.: CAPRAM 2.4 (MODAC mechanism): An extended and condensed tropospheric aqueous phase mechanism and its application, *J. Geophys. Res.*, 108D, 4426, doi:10.1029/2002JD002202, 2003.
- Goldstein, D. J.: Air and steam stripping of toxic pollutants, Tech. Rep. EPA-68-03-002, Industrial Environmental Research Laboratory, Cincinnati, OH, USA, 1982.
- Hanson, D. R., Burkholder, J. B., Howard, C. J., and Ravishankara, A. R.: Measurement of OH and HO<sub>2</sub> radical uptake coefficients on water and sulfuric acid surfaces, *J. Phys. Chem.*, 96, 4979–4985, doi: 10.1021/J100191A046, 1992.
- Haynes, W. M., ed.: CRC Handbook of Chemistry and Physics, 95th Edition (Internet Version 2015), Taylor and Francis Group, 2014.
- Holmes, N. S., Adams, J. W., and Crowley, J. N.: Uptake and reaction of HOI and IONO<sub>2</sub> on frozen and dry NaCl/NaBr surfaces and H<sub>2</sub>SO<sub>4</sub>, *Phys. Chem. Chem. Phys.*, 3, 1679–1687, doi:10.1039/B100247N, 2001.
- Hu, J. H., Shi, Q., Davidovits, P., Worsnop, D. R., Zahniser, M. S., and Kolb, C. E.: Reactive uptake of Cl<sub>2</sub>(g) and Br<sub>2</sub>(g) by aqueous surfaces as a function of Br<sup>−</sup> and I<sup>−</sup> ion concentration: The effect of chemical reaction at the interface, *J. Phys. Chem.*, 99, 8768–8776, doi:10.1021/J100021A050, 1995.
- Jacob, D. J.: Chemistry of OH in remote clouds and its role in the production of formic acid and peroxy-monosulfate, *J. Geophys. Res.*, 91D, 9807–9826, doi:10.1029/JD091ID09P09807, 1986.
- Jayne, J. T., Duan, S. X., Davidovits, P., Worsnop, D. R., Zahniser, M. S., and Kolb, C. E.: Uptake of gas-phase alcohol and organic acid molecules by water surfaces, *J. Phys. Chem.*, 95, 6329–6336, doi: 10.1021/J100169A047, 1991.
- Khan, I., Brimblecombe, P., and Clegg, S. L.: The Henry’s law constants of pyruvic and methacrylic acids, *Environ. Technol.*, 13, 587–593, doi:10.1080/09593339209385187, 1992.
- Khan, I., Brimblecombe, P., and Clegg, S. L.: Solubilities of pyruvic acid and the lower (C<sub>1</sub>–C<sub>6</sub>) carboxylic acids. Experimental determination of equilibrium vapour pressures above pure aqueous and salt solutions, *J. Atmos. Chem.*, 22, 285–302, doi:10.1007/BF00696639, 1995.
- Lax, E.: Taschenbuch für Chemiker und Physiker, Springer Verlag, Berlin, 1969.
- Lide, D. R., ed.: CRC Handbook of Chemistry and Physics, 88th Edition (Internet Version 2008), CRC Press/Taylor and Francis, Boca Raton, FL, 2008.
- Lind, J. A. and Kok, G. L.: Correction to “Henry’s law determinations for aqueous solutions of hydrogen peroxide, methylhydroperoxide, and peroxyacetic acid” by John A. Lind and Gregory L. Kok, *J. Geophys. Res.*, 99D, 21 119, 1994.

- Magi, L., Schweitzer, F., Pallares, C., Cherif, S., Mirabel, P., and George, C.: Investigation of the uptake rate of ozone and methyl hydroperoxide by water surfaces, *J. Phys. Chem. A*, 101, 4943–4949, doi:10.1021/JP970646M, 1997.
- Mössinger, J. C. and Cox, R. A.: Heterogeneous reaction of HOI with sodium halide salts, *J. Phys. Chem. A*, 105, 5165–5177, doi:10.1021/JP0044678, 2001.
- Palmer, D. A., Ramette, R. W., and Mesmer, R. E.: The hydrolysis of iodine: Equilibria at high temperatures, *J. Nucl. Mater.*, 130, 280–286, doi:10.1016/0022-3115(85)90317-4, 1985.
- Pandis, S. N. and Seinfeld, J. H.: Sensitivity analysis of a chemical mechanism for aqueous-phase atmospheric chemistry, *J. Geophys. Res.*, 94D, 1105–1126, doi:10.1029/JD094ID01P01105, 1989.
- Ponche, J. L., George, C., and Mirabel, P.: Mass transfer at the air/water interface: Mass accommodation coefficients of SO<sub>2</sub>, HNO<sub>3</sub>, NO<sub>2</sub> and NH<sub>3</sub>, *J. Atmos. Chem.*, 16, 1–21, doi:10.1007/BF00696620, 1993.
- Pöschl, U., Canagaratna, M., Jayne, J. T., Molina, L. T., Worsnop, D. R., Kolb, C. E., and Molina, M. J.: Mass accommodation coefficient of H<sub>2</sub>SO<sub>4</sub> vapor on aqueous sulfuric acid surfaces and gaseous diffusion coefficient of H<sub>2</sub>SO<sub>4</sub> in N<sub>2</sub>/H<sub>2</sub>O, *J. Phys. Chem. A*, 102, 10 082–10 089, doi:10.1021/JP982809S, 1998.
- Régimbal, J.-M. and Mozurkewich, M.: Peroxynitric acid decay mechanisms and kinetics at low pH, *J. Phys. Chem. A*, 101, 8822–8829, doi:10.1021/JP971908N, 1997.
- Rudich, Y., Talukdar, R. K., Imamura, T., Fox, R. W., and Ravishankara, A. R.: Uptake of NO<sub>3</sub> on KI solutions: Rate coefficient for the NO<sub>3</sub> + I<sup>−</sup> reaction and gas-phase diffusion coefficients for NO<sub>3</sub>, *Chem. Phys. Lett.*, 261, 467–473, doi:10.1016/0009-2614(96)00980-3, 1996.
- Saastad, O. W., Ellermann, T., and Nielsen, C. J.: On the adsorption of NO and NO<sub>2</sub> on cold H<sub>2</sub>O/H<sub>2</sub>SO<sub>4</sub> surfaces, *Geophys. Res. Lett.*, 20, 1191–1193, doi:10.1029/93GL01621, 1993.
- Sander, S. P., Abbatt, J., Barker, J. R., Burkholder, J. B., Friedl, R. R., Golden, D. M., Huie, R. E., Kolb, C. E., Kurylo, M. J., Moortgat, G. K., Orkin, V. L., and Wine, P. H.: Chemical Kinetics and Photochemical Data for Use in Atmospheric Studies, Evaluation No. 17, JPL Publication 10-6, Jet Propulsion Laboratory, Pasadena, <http://jpldataeval.jpl.nasa.gov>, 2011.
- Schwartz, S. E. and White, W. H.: Solubility equilibria of the nitrogen oxides and oxyacids in dilute aqueous solution, in: *Advances in Environmental Science and Engineering*, edited by Pfafflin, J. R. and Ziegler, E. N., vol. 4, pp. 1–45, Gordon and Breach Science Publishers, NY, 1981.
- Schweitzer, F., Mirabel, P., and George, C.: Uptake of hydrogen halides by water droplets, *J. Phys. Chem. A*, 104, 72–76, doi:10.1021/JP992621O, 2000.
- Shon, Z.-H., Kim, K.-H., Kim, M.-Y., and Lee, M.: Modeling study of reactive gaseous mercury in the urban air, *Atmos. Environ.*, 39, 749–761, doi:10.1016/J.ATMOSENV.2004.09.071, 2005.
- Snider, J. R. and Dawson, G. A.: Tropospheric light alcohols, carbonyls, and acetonitrile: Concentrations in the southwestern United States and Henry’s law data, *J. Geophys. Res.*, 90D, 3797–3805, doi:10.1029/JD090ID02P03797, 1985.
- Takami, A., Kato, S., Shimono, A., and Koda, S.: Uptake coefficient of OH radical on aqueous surface, *Chem. Phys.*, 231, 215–227, doi:10.1016/S0301-0104(98)00004-4, 1998.
- Thornton, J. and Abbatt, J. P. D.: Measurements of HO<sub>2</sub> uptake to aqueous aerosol: Mass accommodation coefficients and net reactive loss, *J. Geophys. Res.*, 110D, doi:10.1029/2004JD005402, 2005.

- Wagman, D. D., Evans, W. H., Parker, V. B., Schumm, R. H., Halow, I., Bailey, S. M., Churney, K. L., and Nuttall, R. L.: The NBS tables of chemical thermodynamic properties; Selected values for inorganic and C<sub>1</sub> and C<sub>2</sub> organic substances in SI units, *J. Phys. Chem. Ref. Data*, 11, suppl. 2, 1982.
- Watts, S. F. and Brimblecombe, P.: The Henry's law constant of dimethyl sulphoxide, *Environ. Technol. Lett.*, 8, 483–486, doi:10.1080/09593338709384509, 1987.
- Wilhelm, E., Battino, R., and Wilcock, R. J.: Low-pressure solubility of gases in liquid water, *Chem. Rev.*, 77, 219–262, doi:10.1021/CR60306A003, 1977.
- Worsnop, D. R., Zahniser, M. S., Kolb, C. E., Gardner, J. A., Watson, L. R., van Doren, J. M., Jayne, J. T., and Davidovits, P.: The temperature dependence of mass accommodation of SO<sub>2</sub> and H<sub>2</sub>O<sub>2</sub> on aqueous surfaces, *J. Phys. Chem.*, 93, 1159–1172, doi:10.1021/J100340A027, 1989.
