# Supplementary figures and images for: The atmospheric chemistry box model CAABA/MECCA-4.0gmdd
Source: Copernicus journal article supplement (doi:10.5194/gmd-2018-201), 2018-09-03

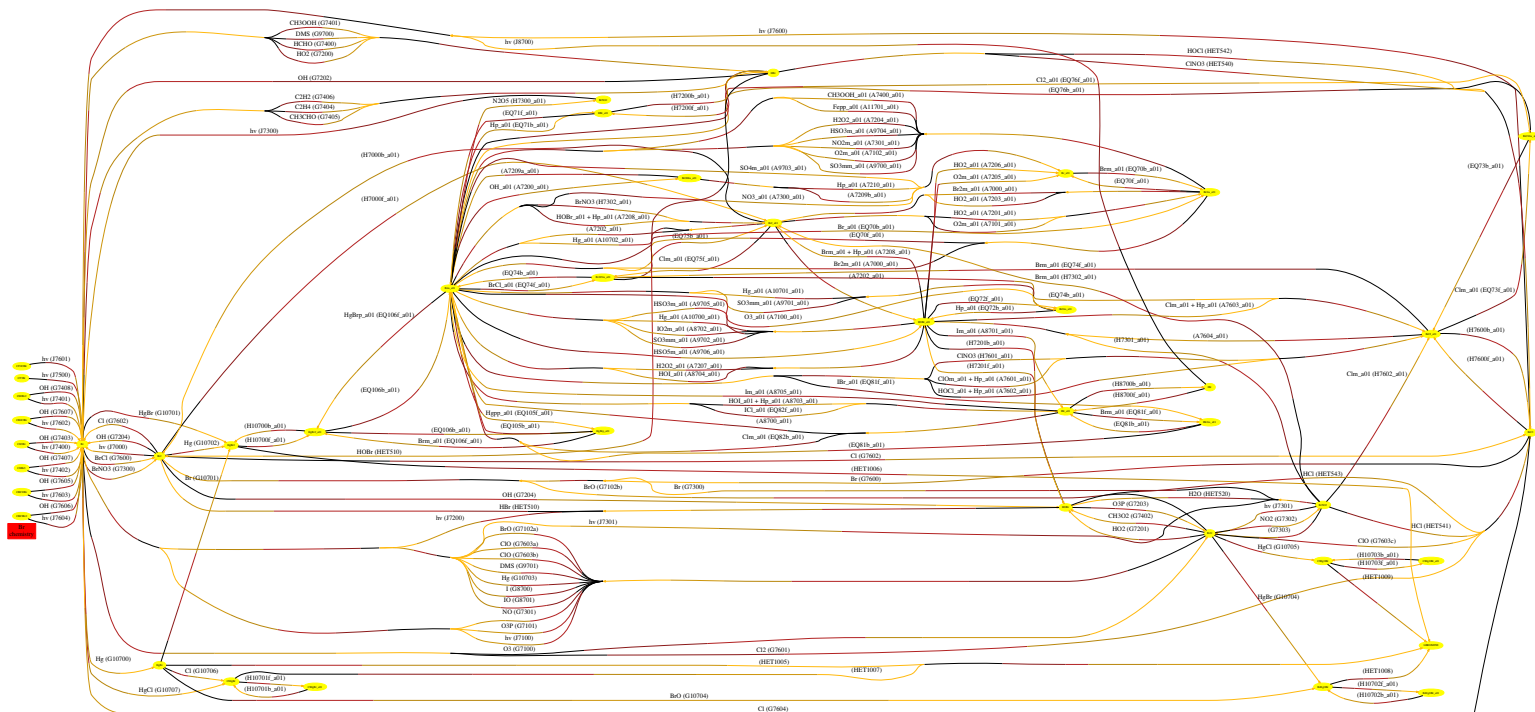

Supplement: Supplementary file 1 [file gmd-2018-201-supplement.zip]

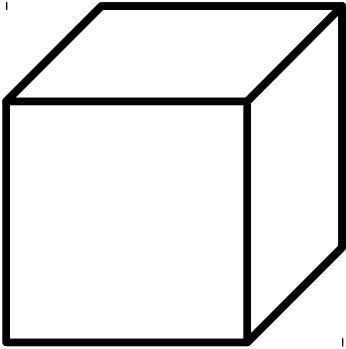

time →

temperature

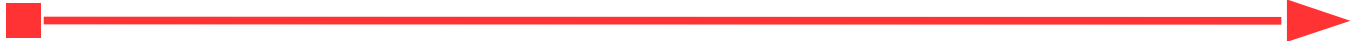

pressure

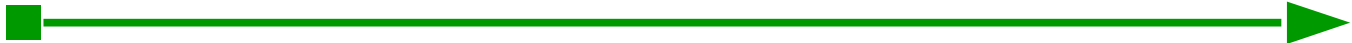

humidity

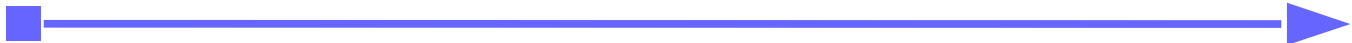

Supplement: Supplementary file 2 [file gmd-2018-201-supplement.zip]

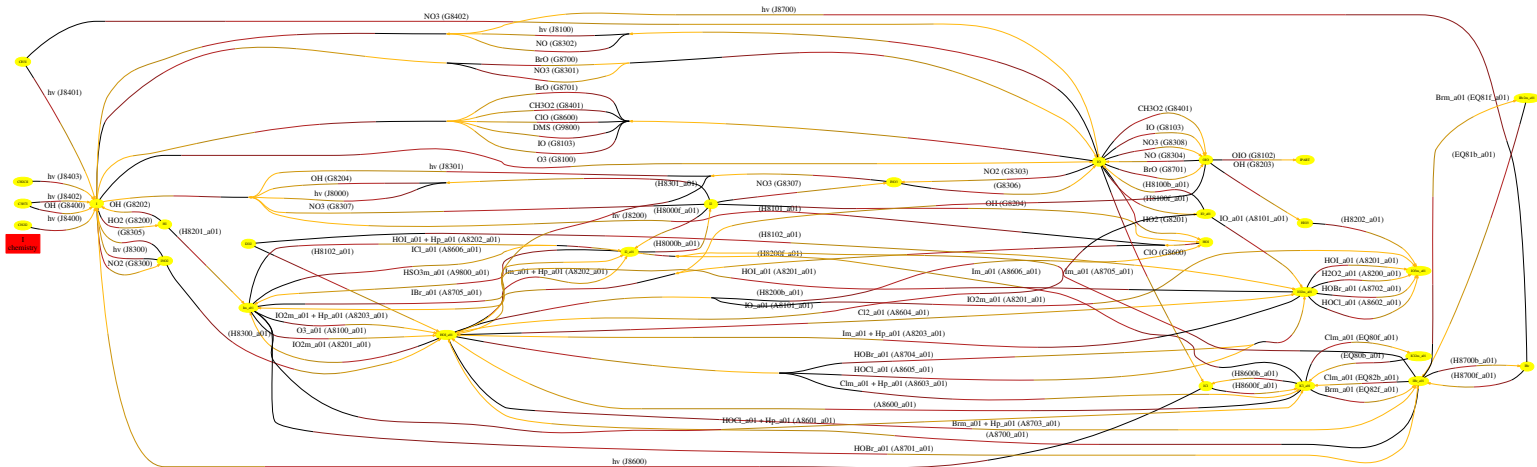

Supplement: Supplementary file 3 [file gmd-2018-201-supplement.zip]

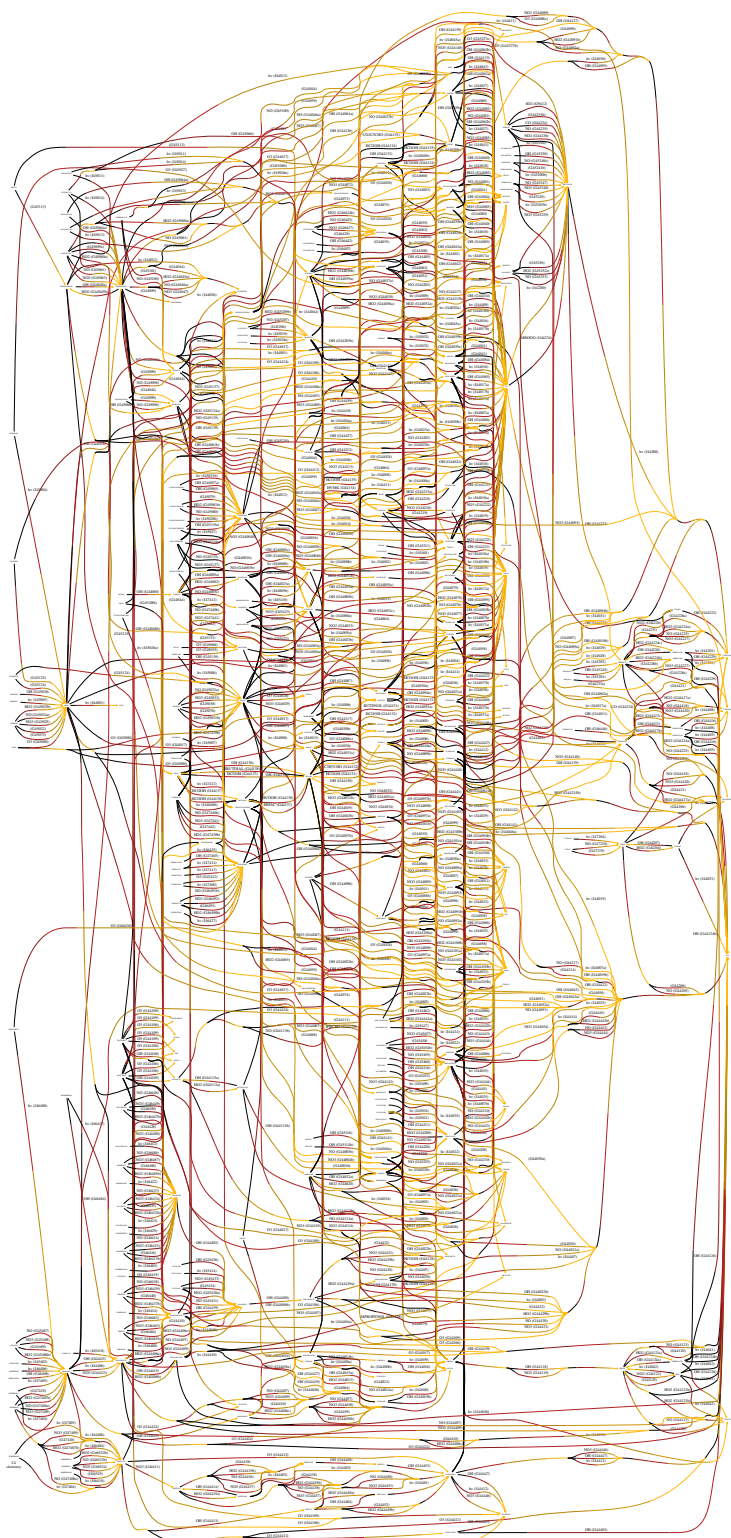

Supplement: Supplementary file 4 [file gmd-2018-201-supplement.zip]

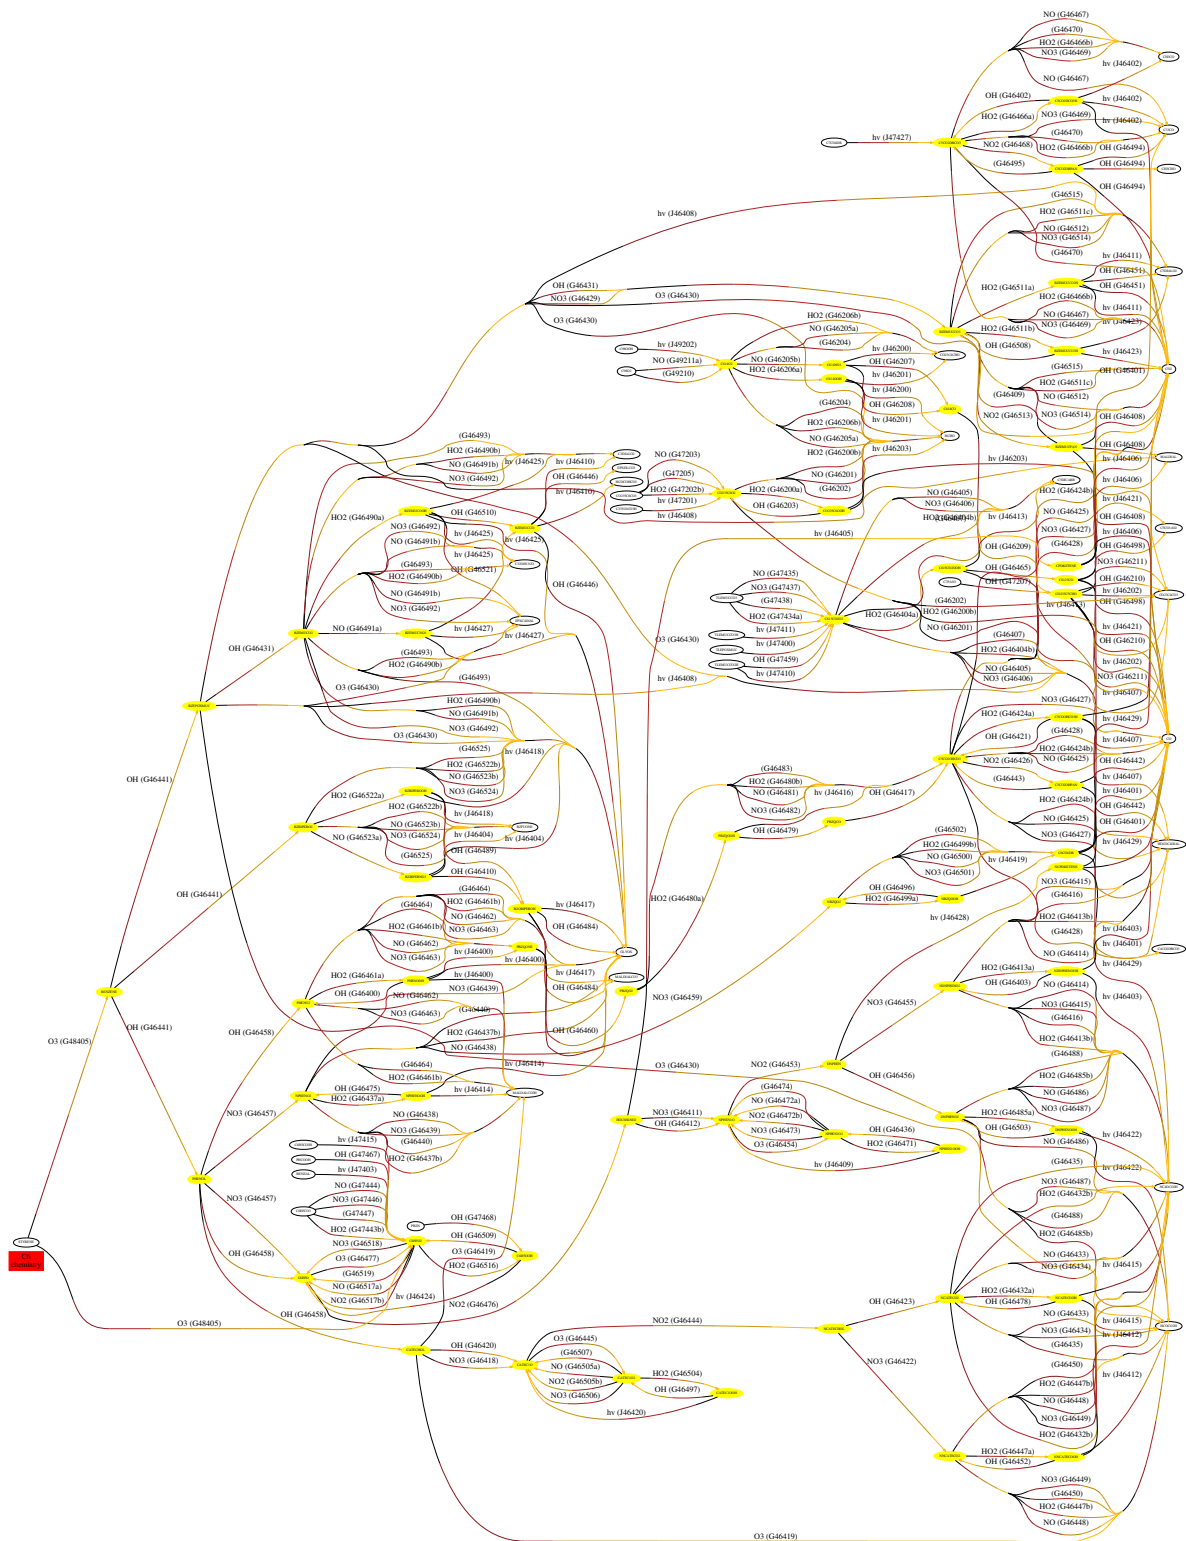

Supplement: Supplementary file 5 [file gmd-2018-201-supplement.zip]

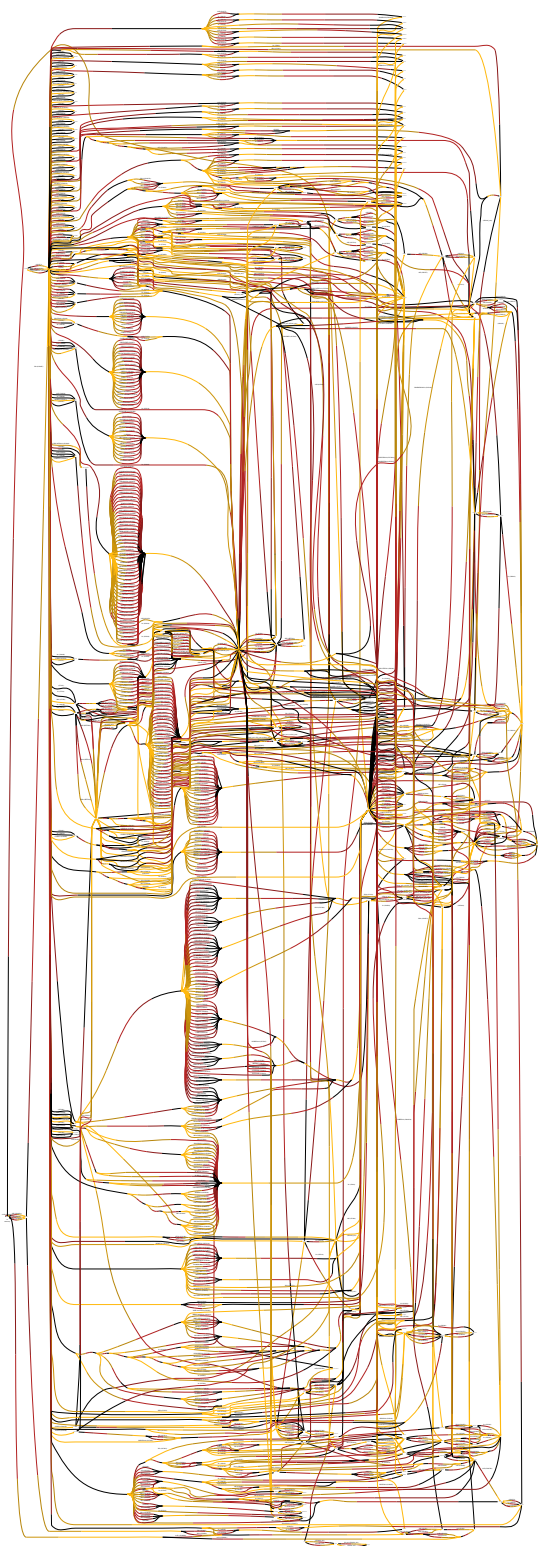

Supplement: Supplementary file 6 [file gmd-2018-201-supplement.zip]

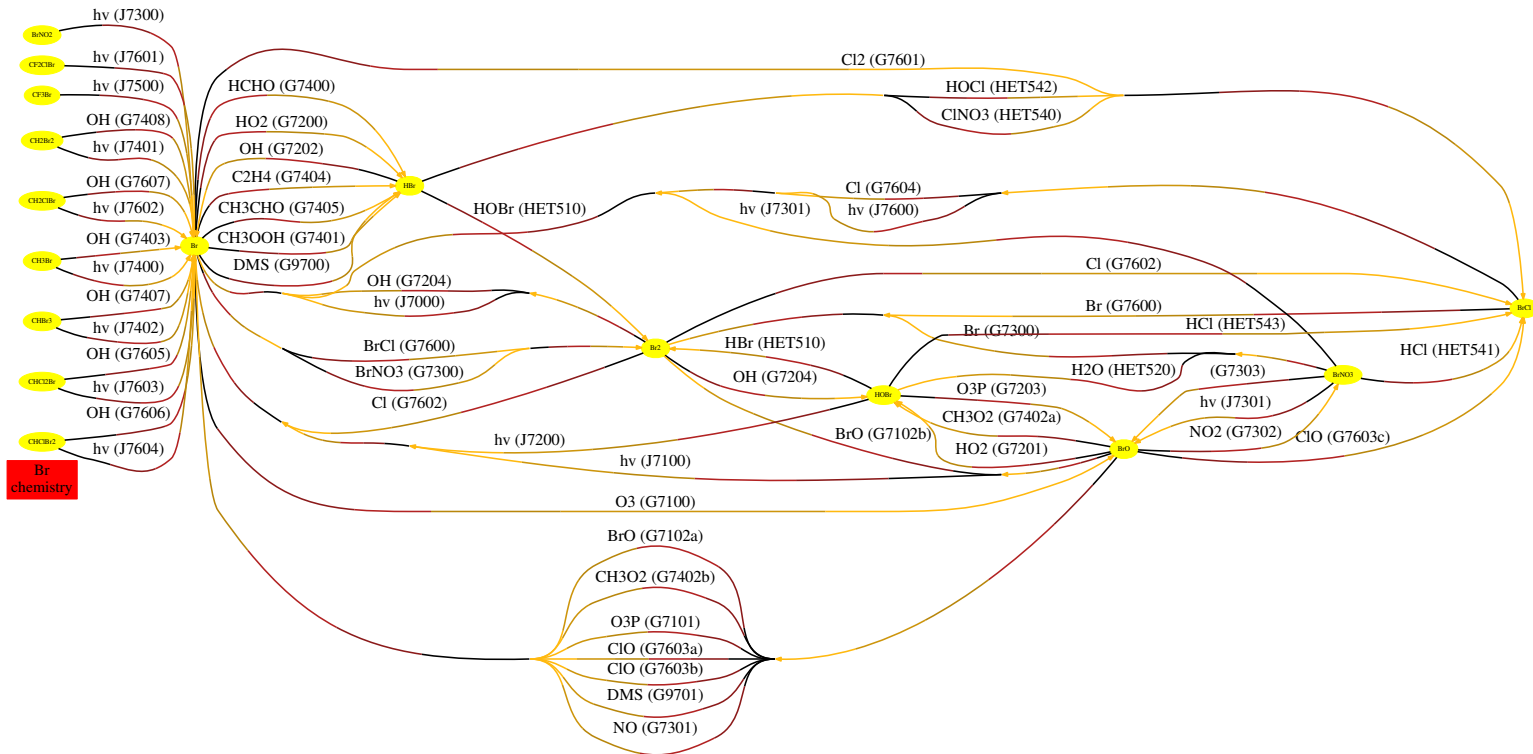

Supplement: Supplementary file 7 [file gmd-2018-201-supplement.zip]

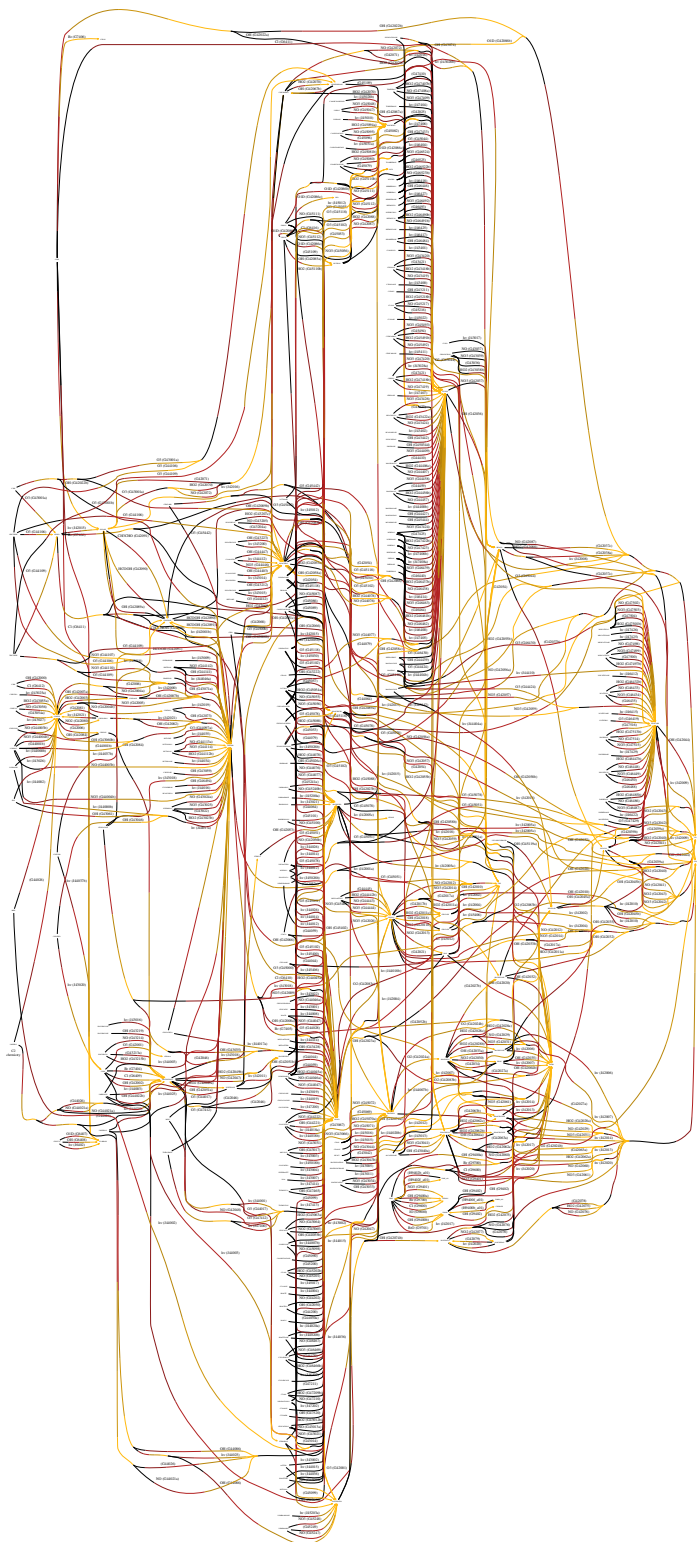

Supplement: Supplementary file 8 [file gmd-2018-201-supplement.zip]

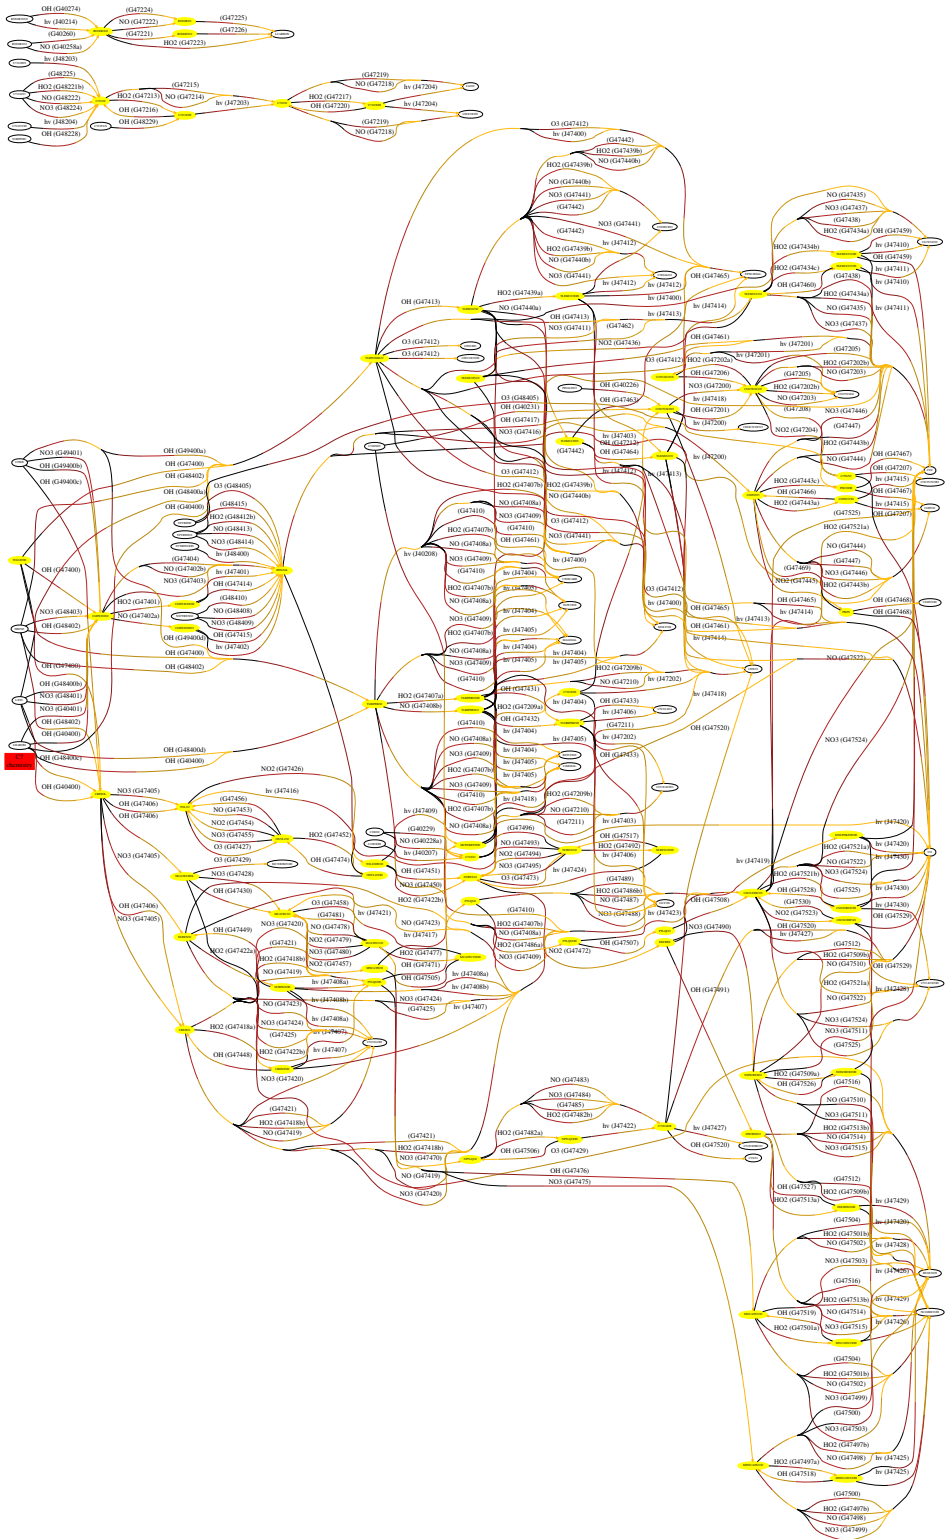

Supplement: Supplementary file 9 [file gmd-2018-201-supplement.zip]

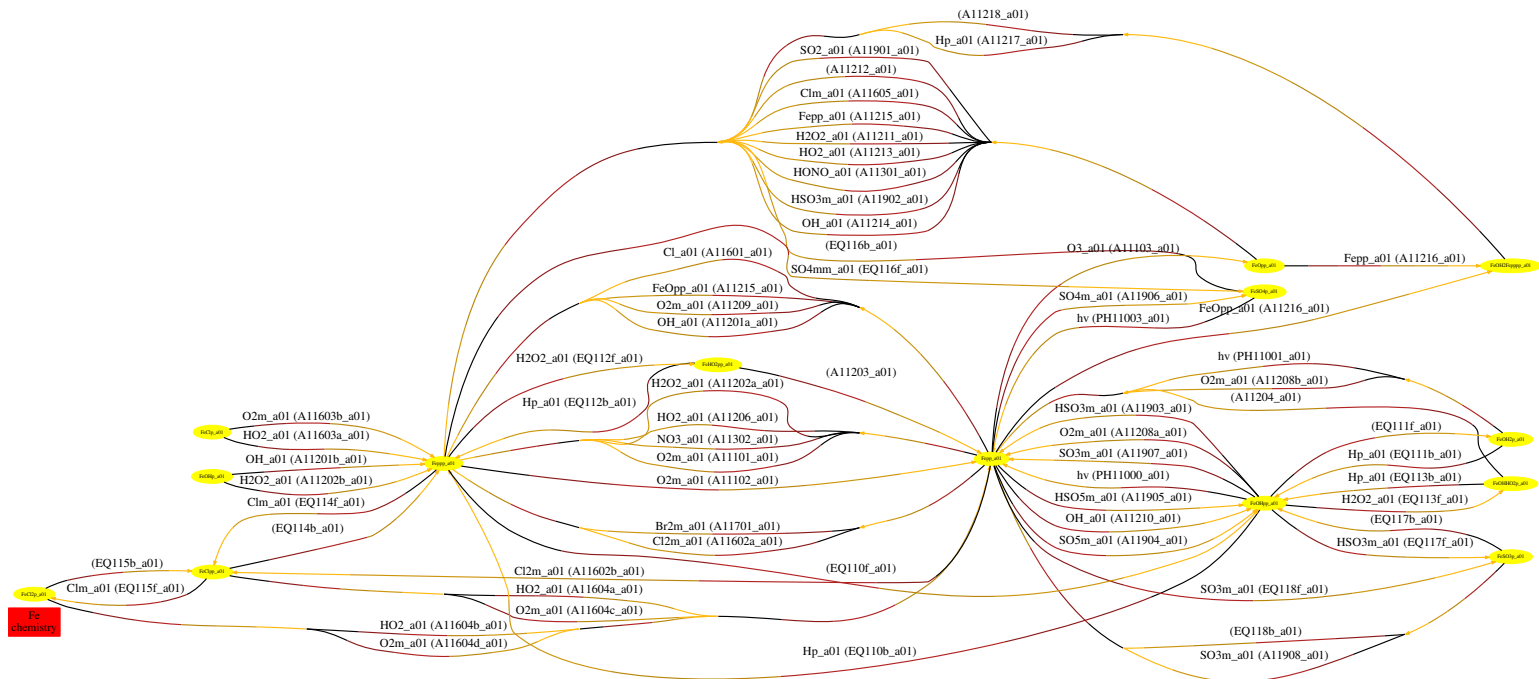

Supplement: Supplementary file 10 [file gmd-2018-201-supplement.zip]

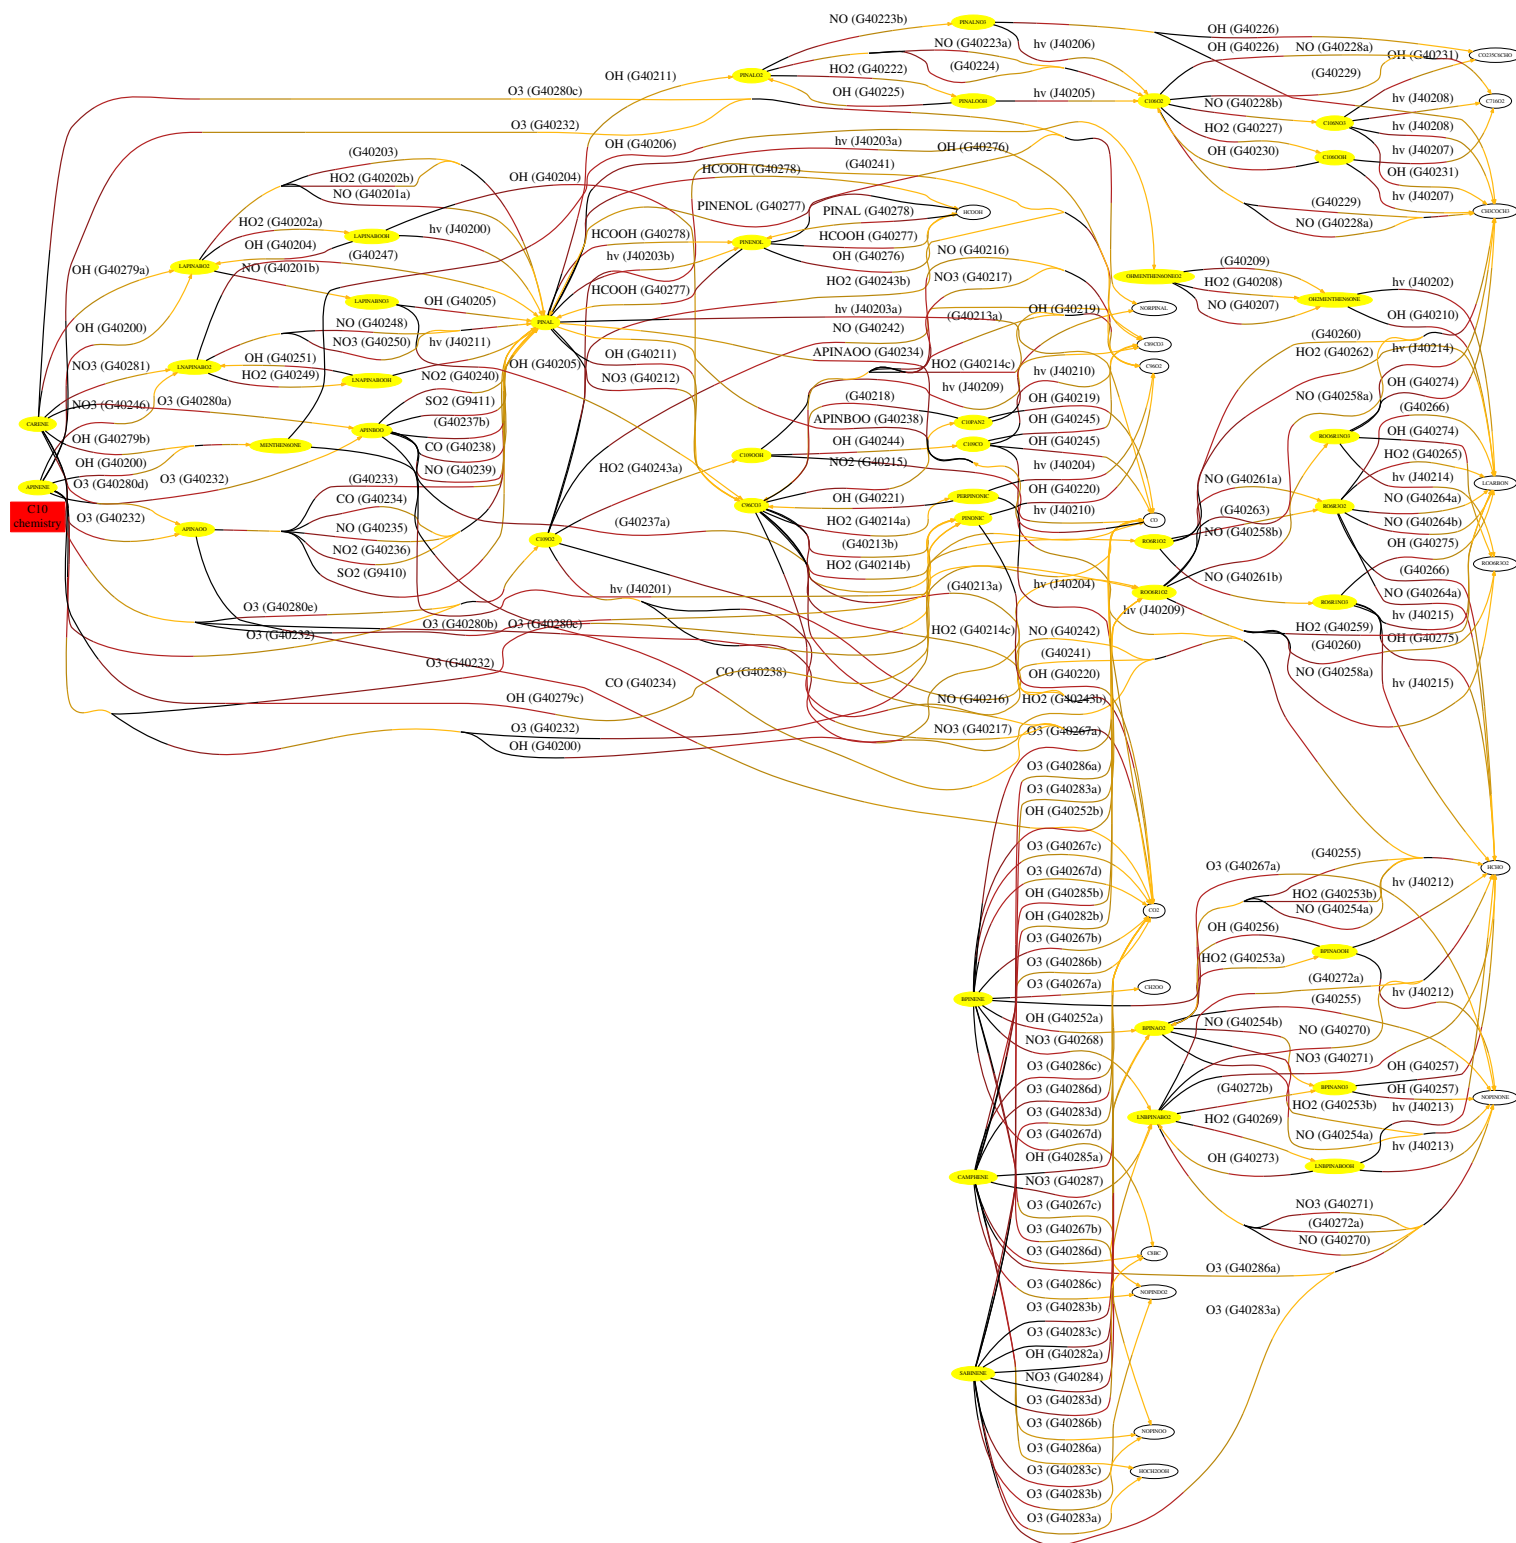

Supplement: Supplementary file 11 [file gmd-2018-201-supplement.zip]

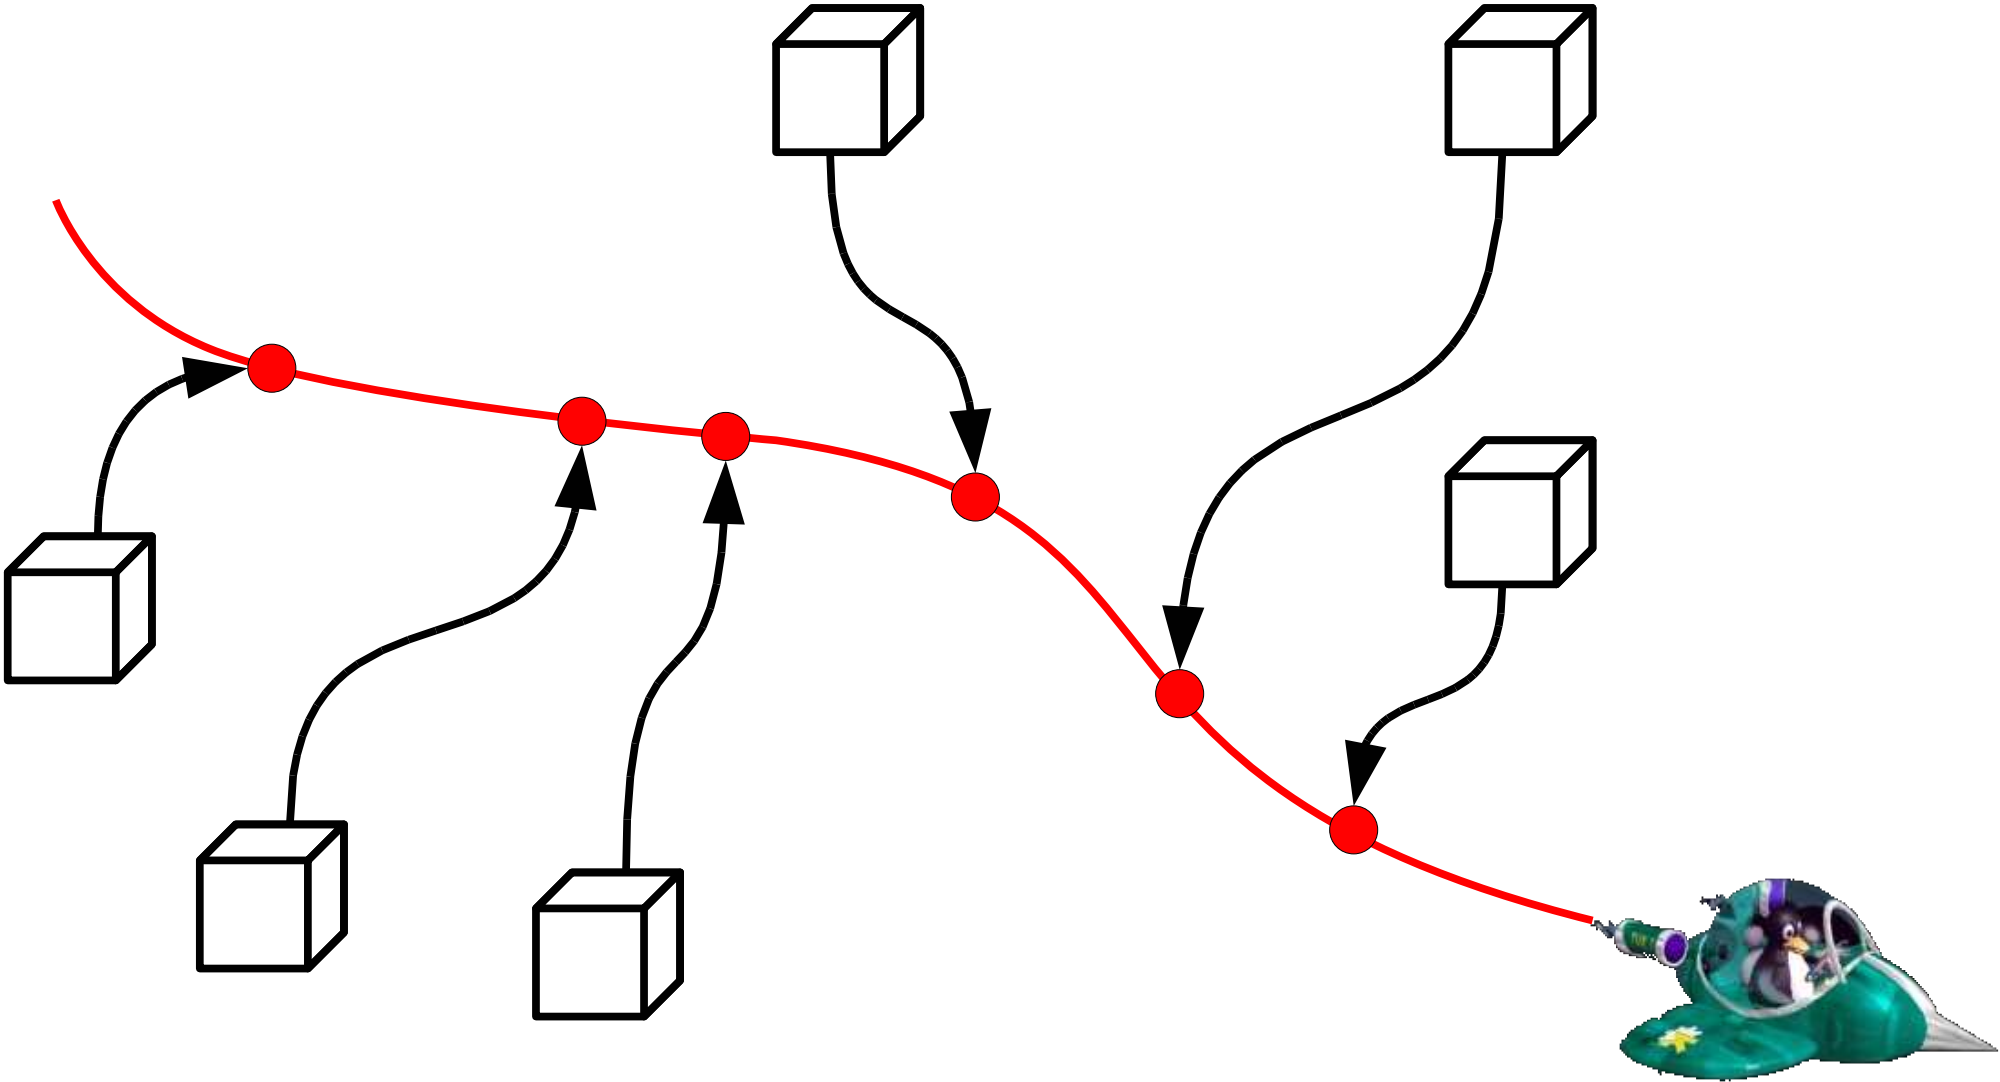

Supplement: Supplementary file 14 [file gmd-2018-201-supplement.zip]

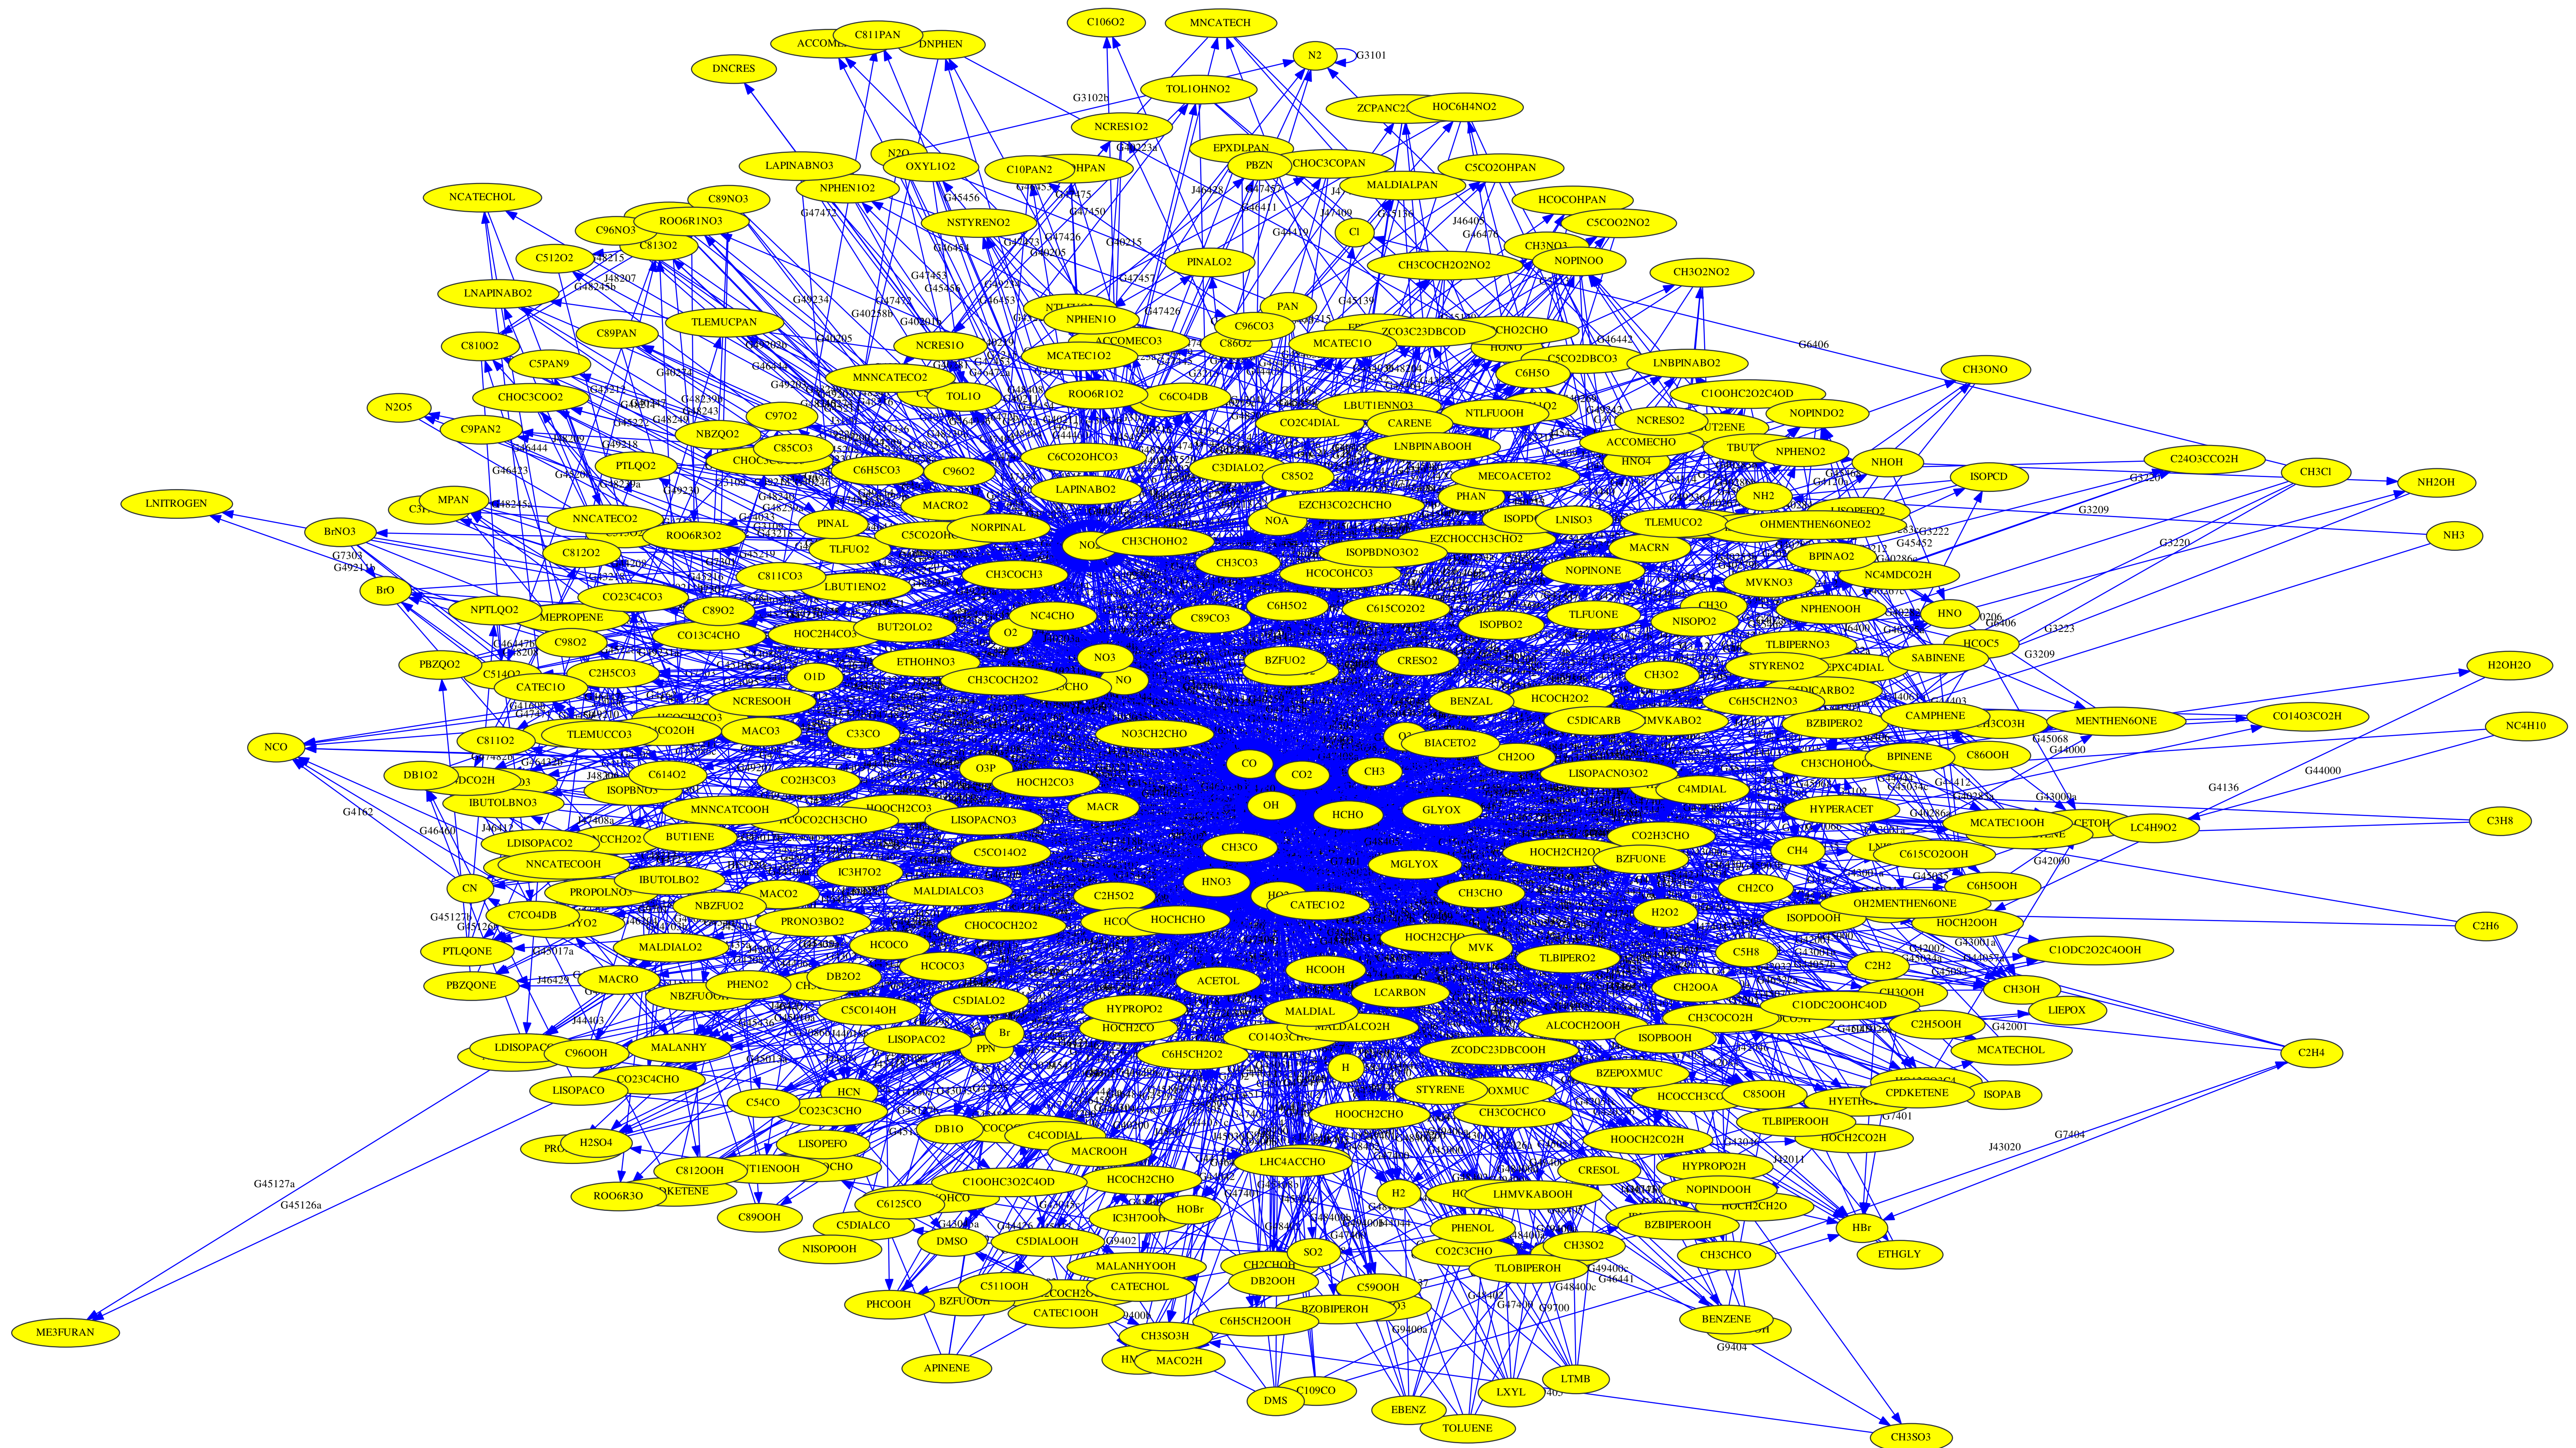

Supplement: Supplementary file 17 [file gmd-2018-201-supplement.zip]

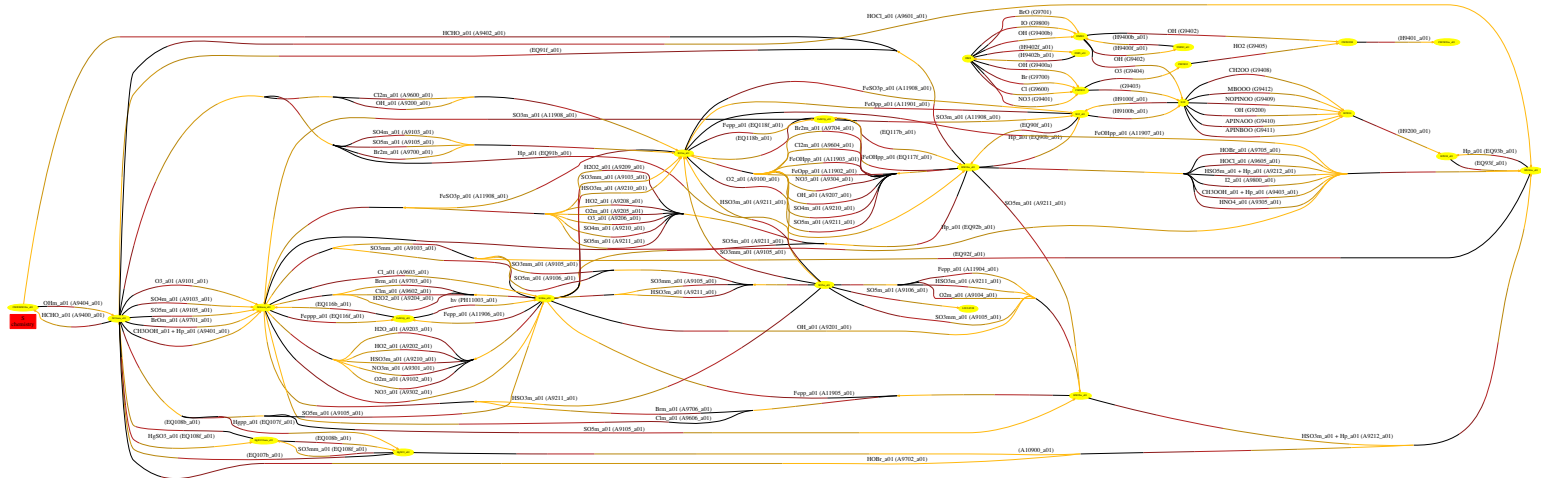

Supplement: Supplementary file 21 [file gmd-2018-201-supplement.zip]

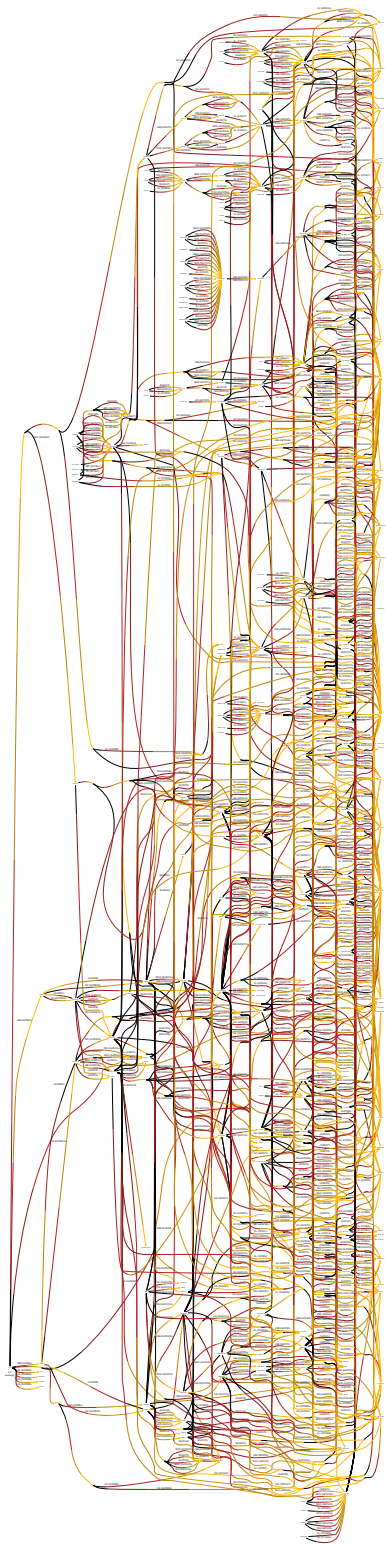

Supplement: Supplementary file 22 [file gmd-2018-201-supplement.zip]

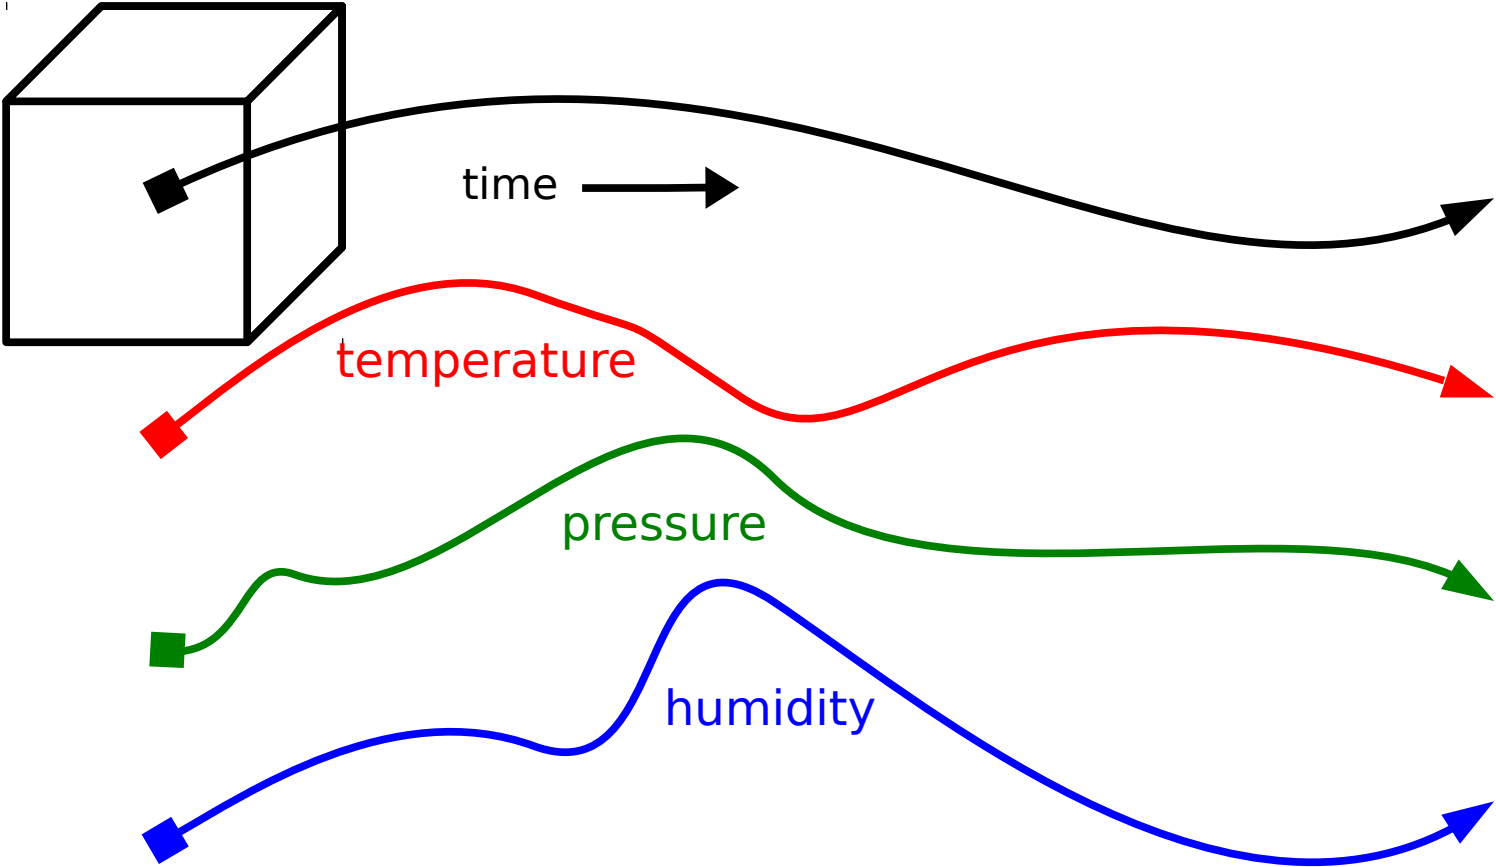

Supplement: Supplementary file 23 [file gmd-2018-201-supplement.zip]

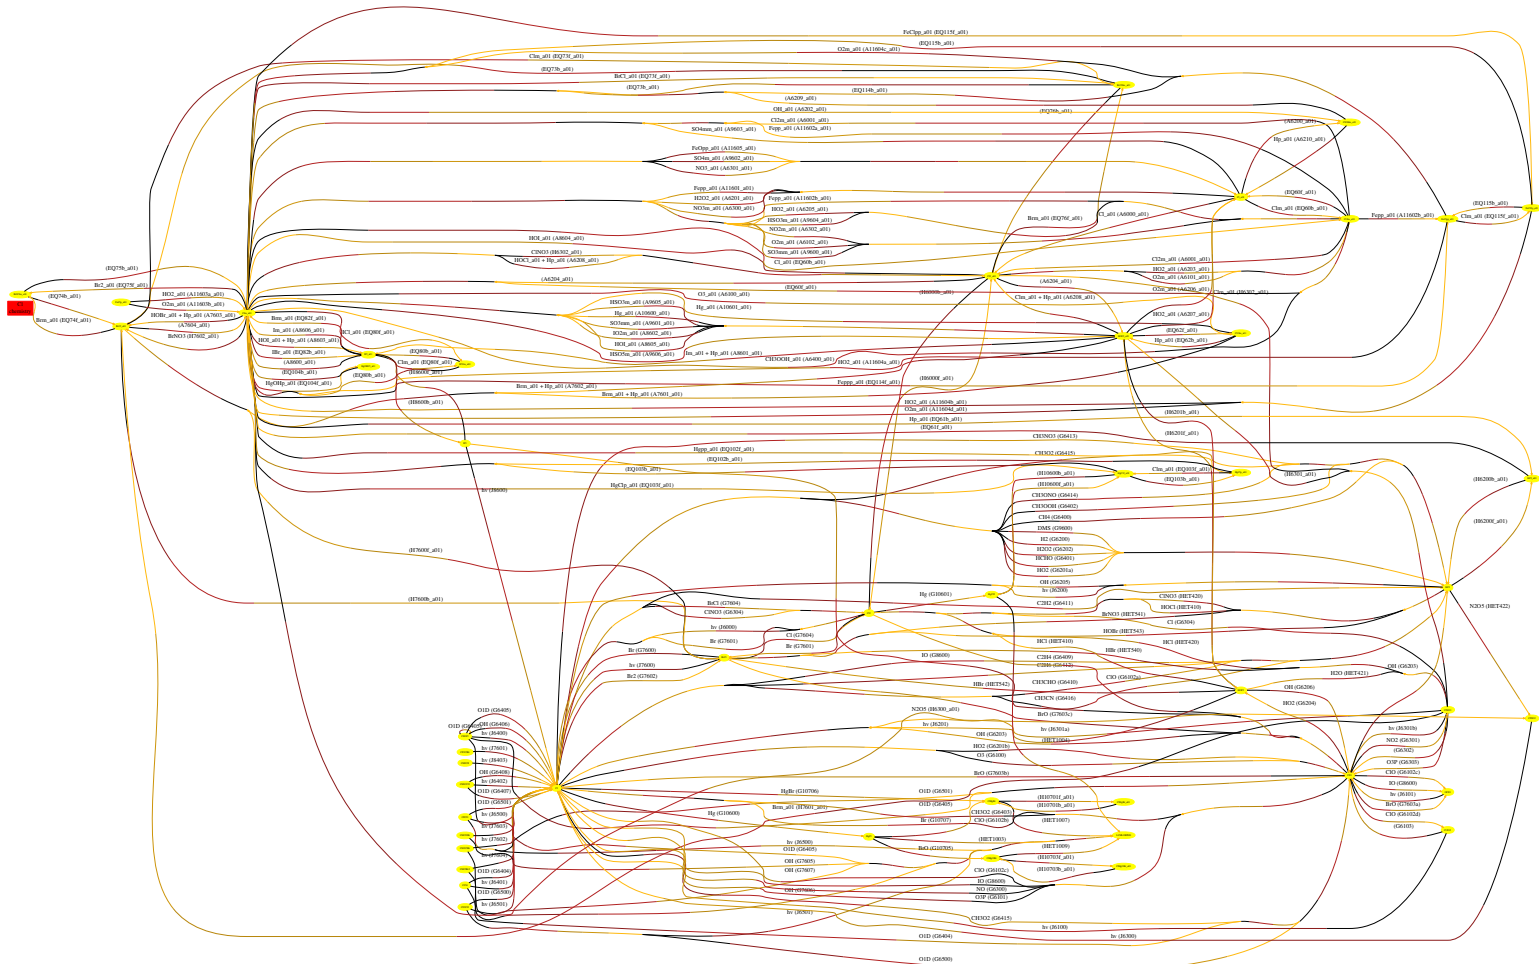

Supplement: Supplementary file 25 [file gmd-2018-201-supplement.zip]

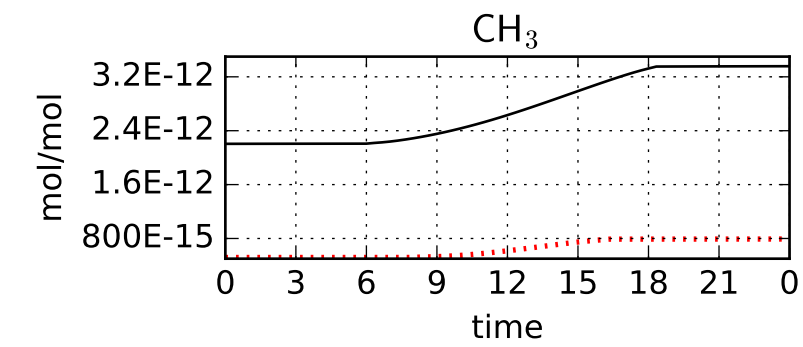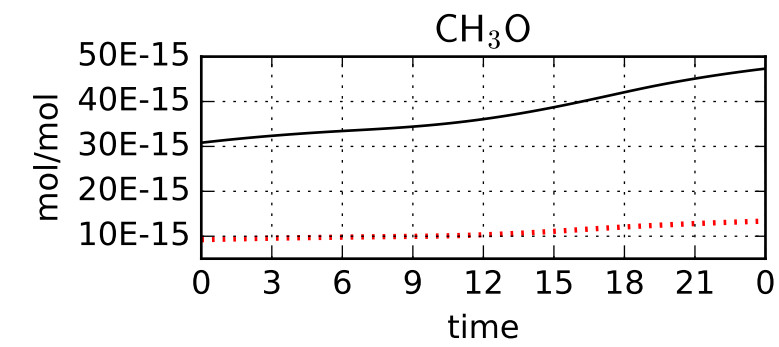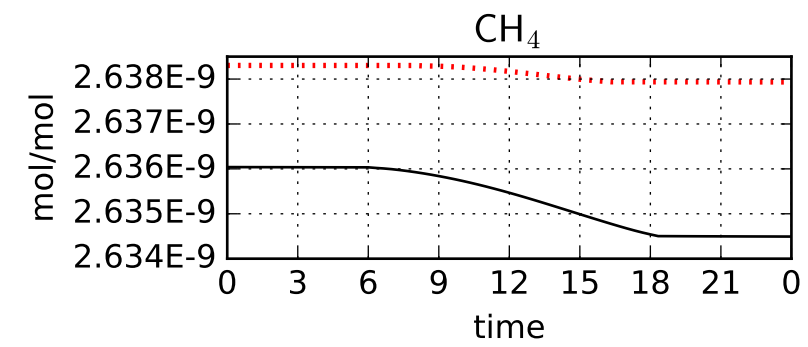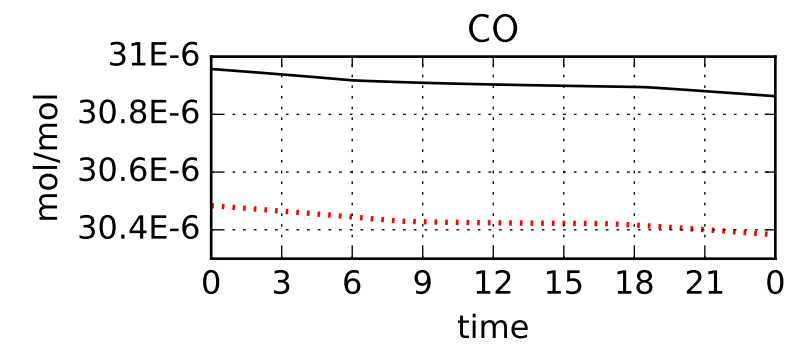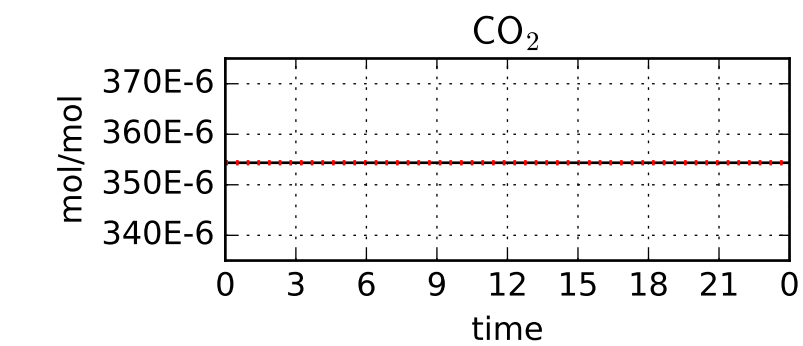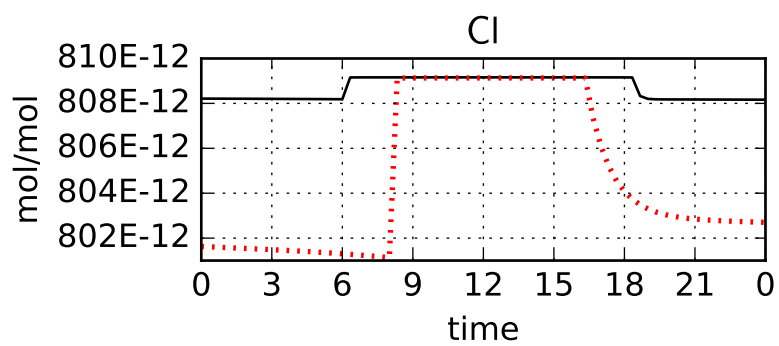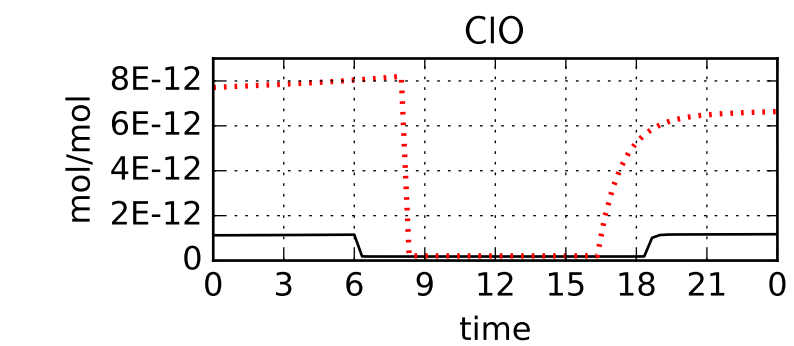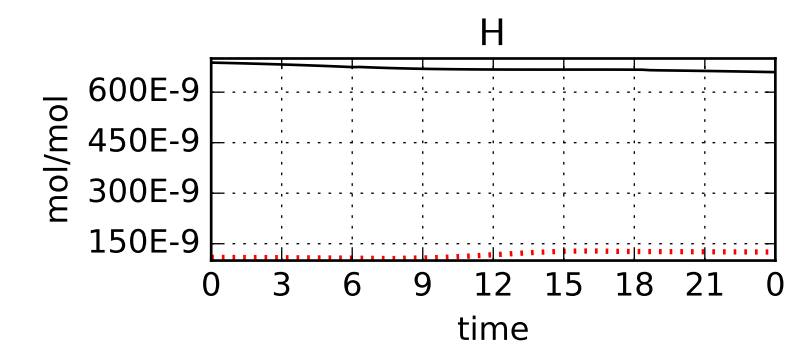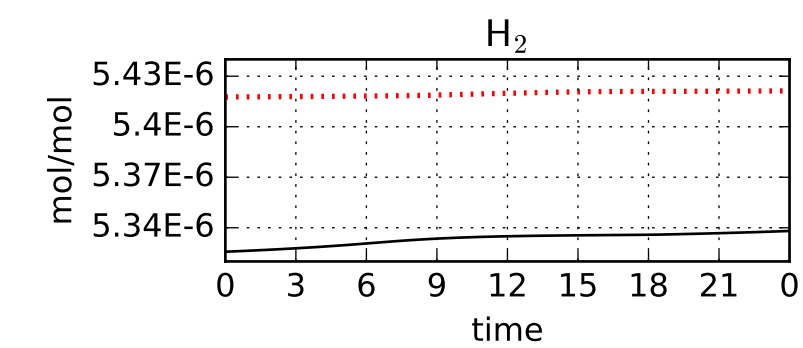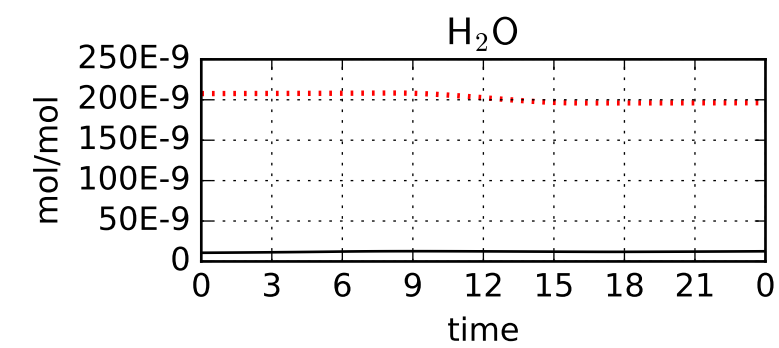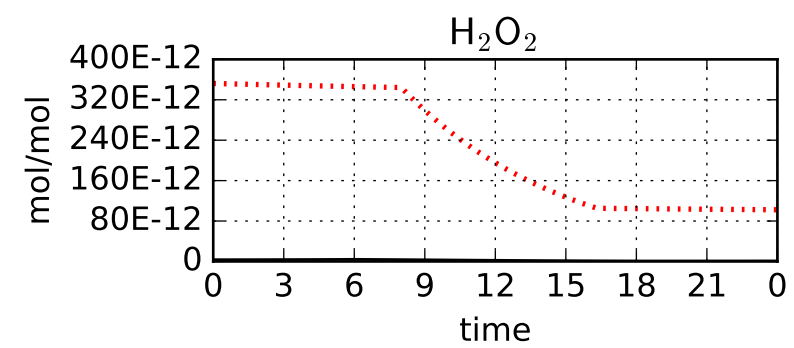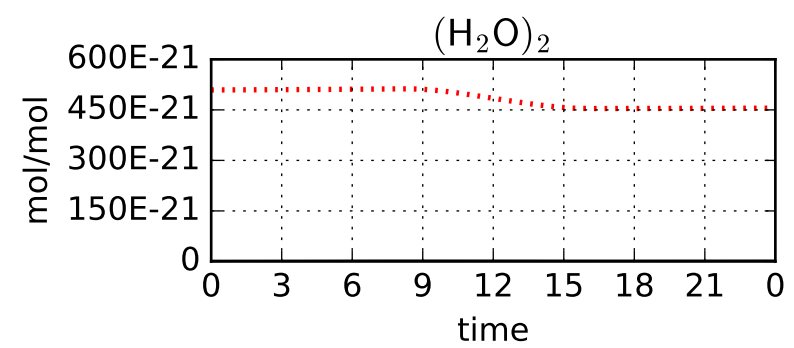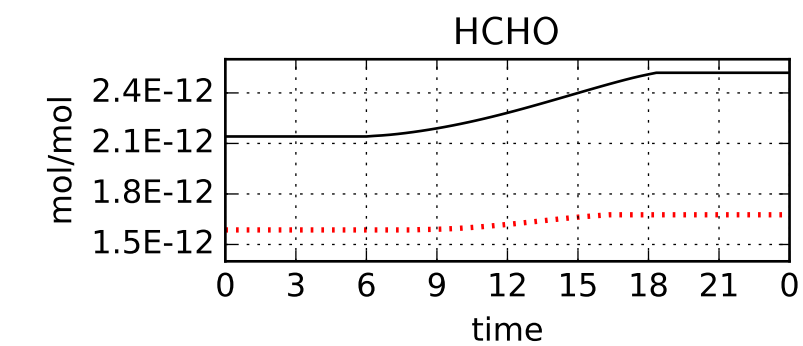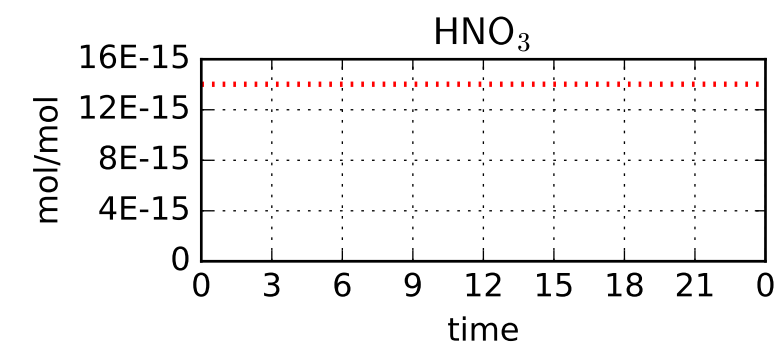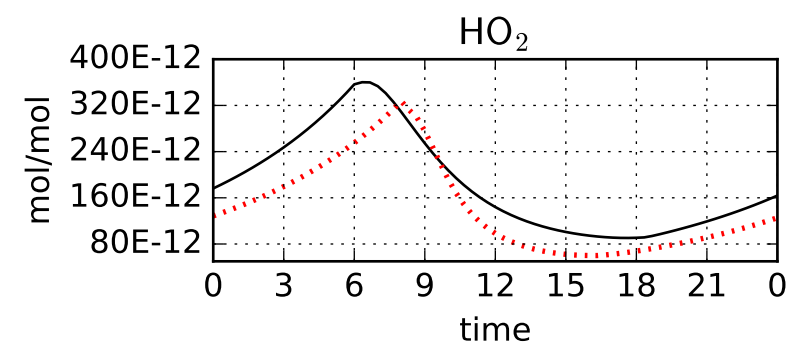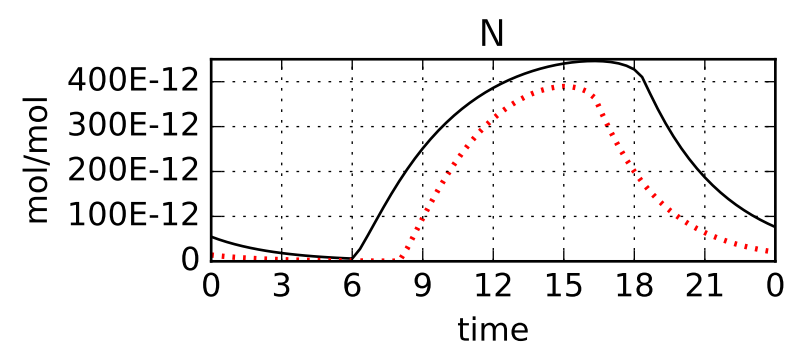

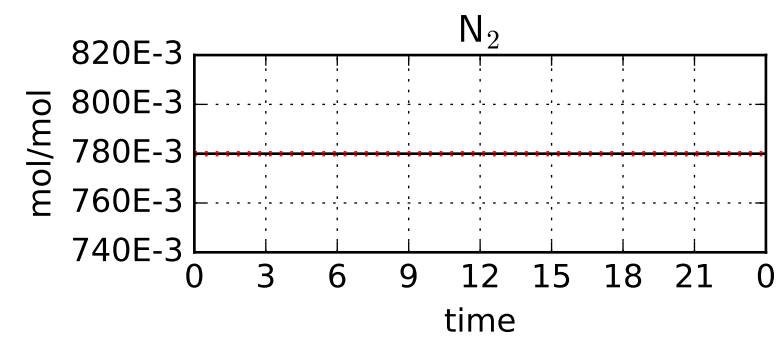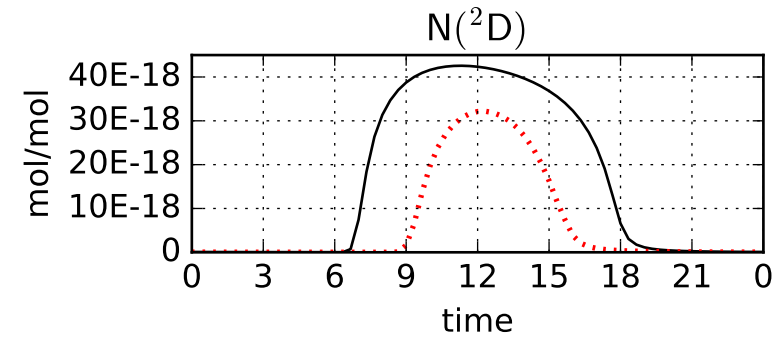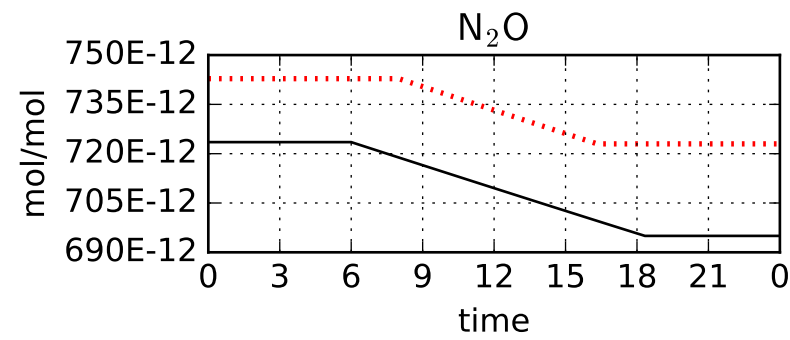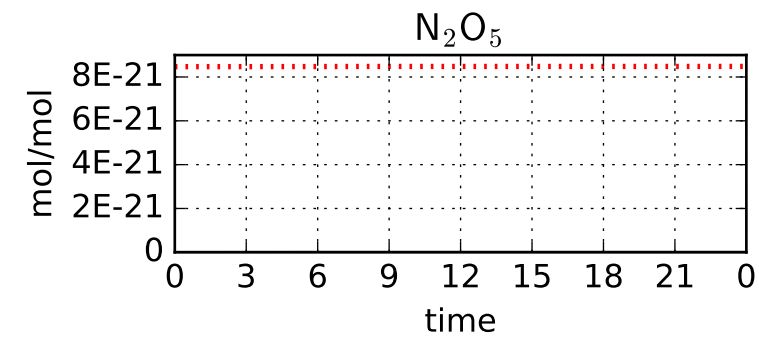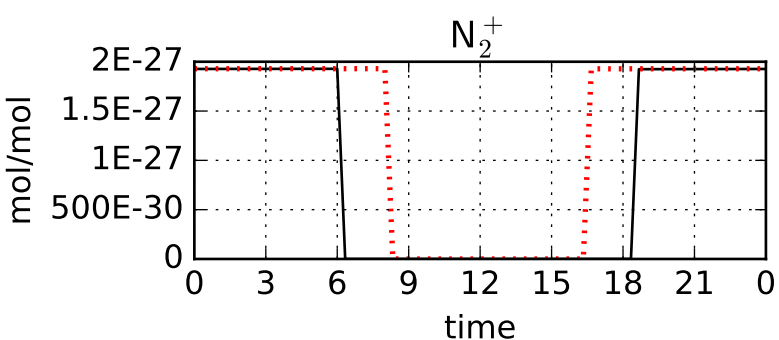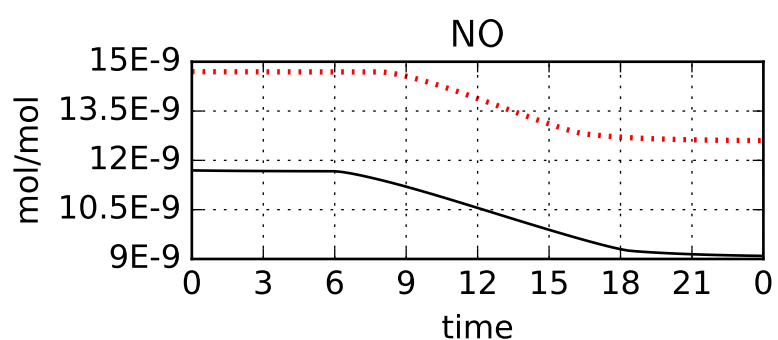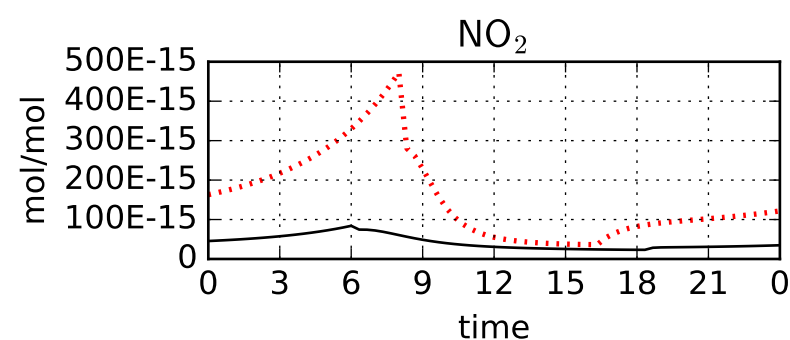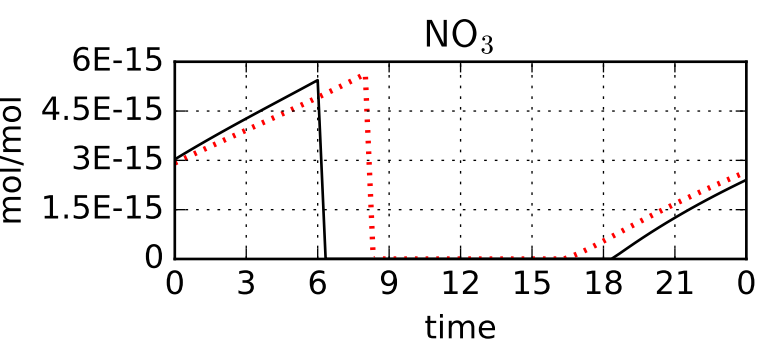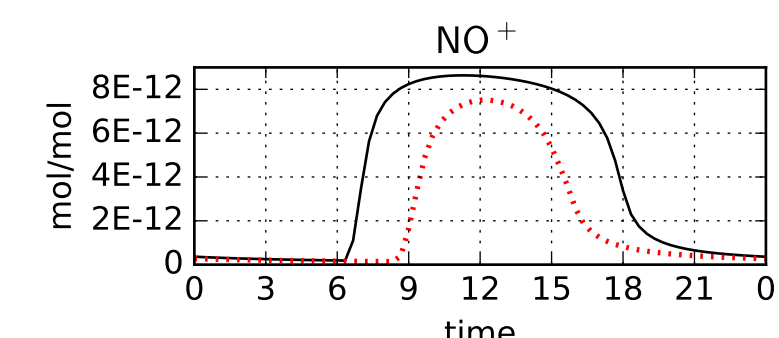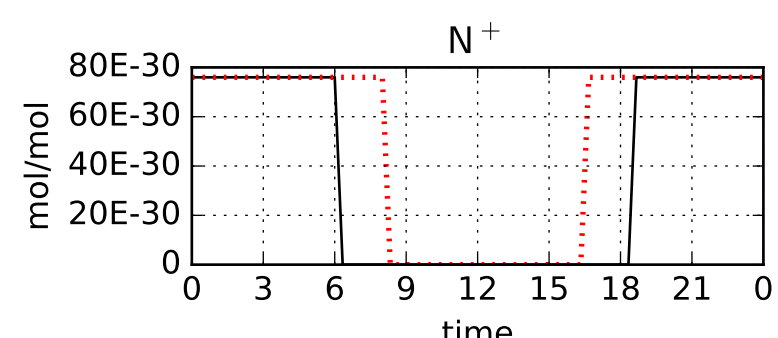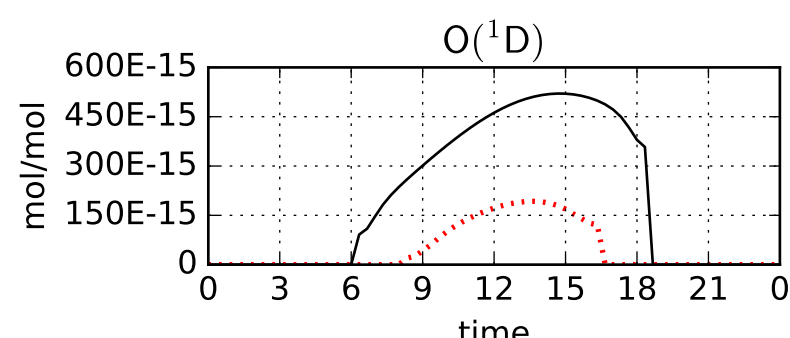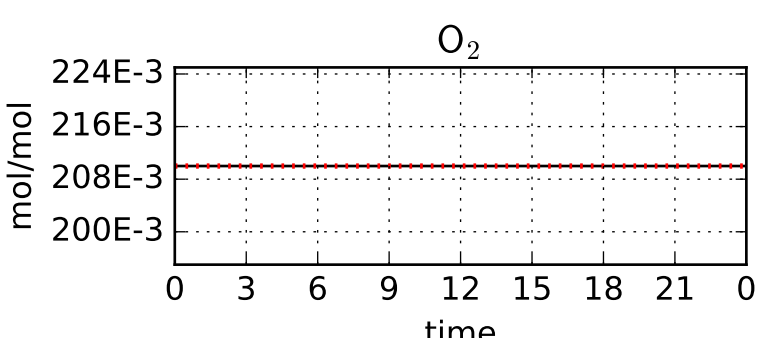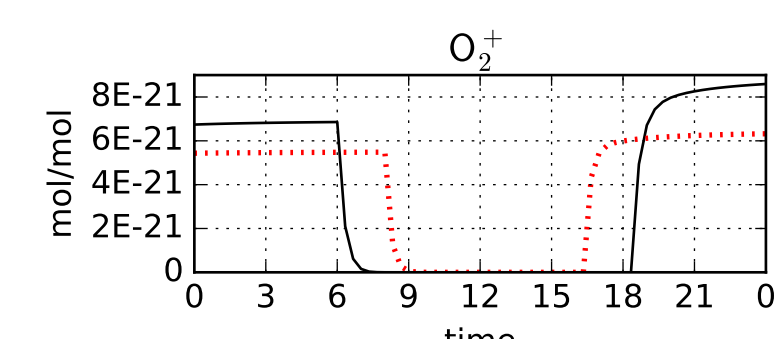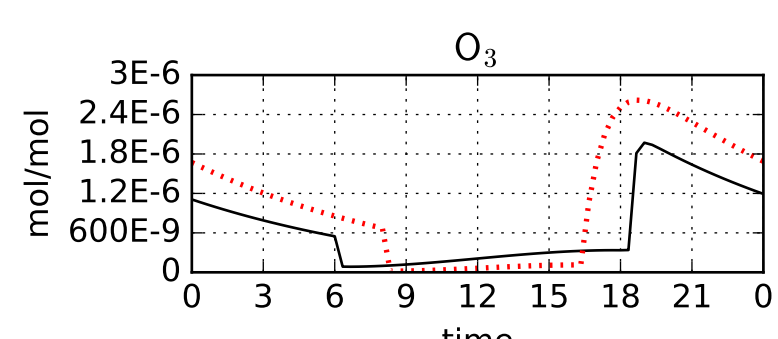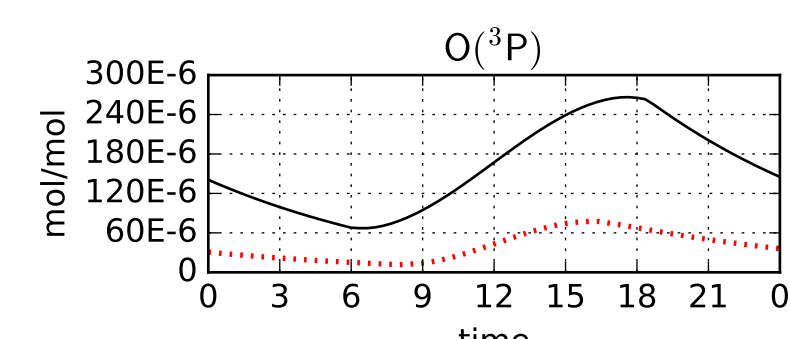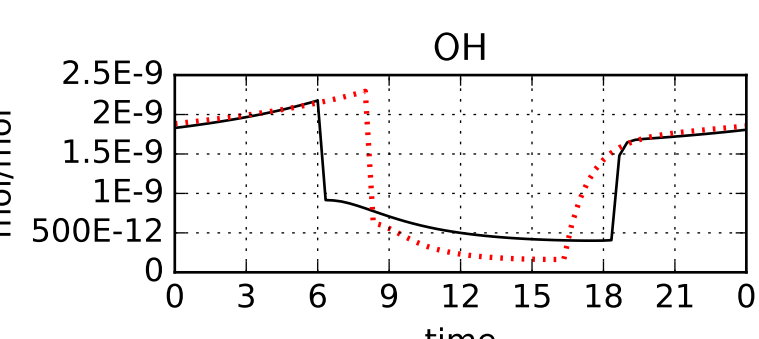

$O^+$ 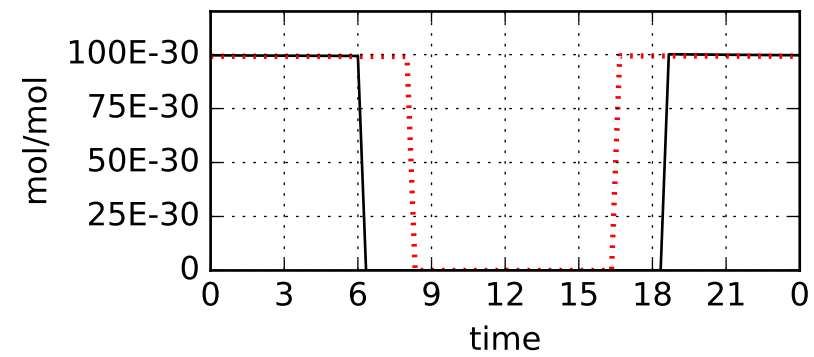 $e^-$ 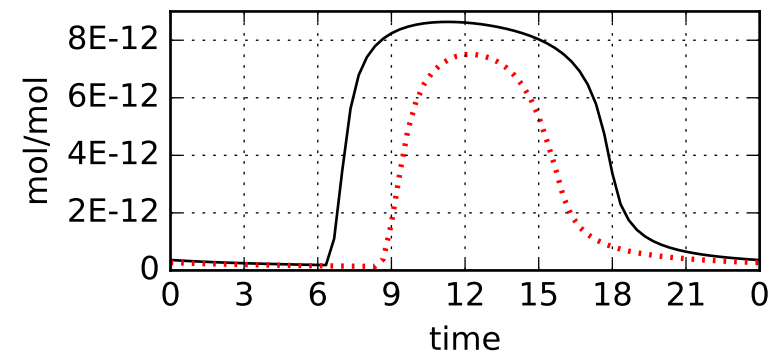

kJ/mol

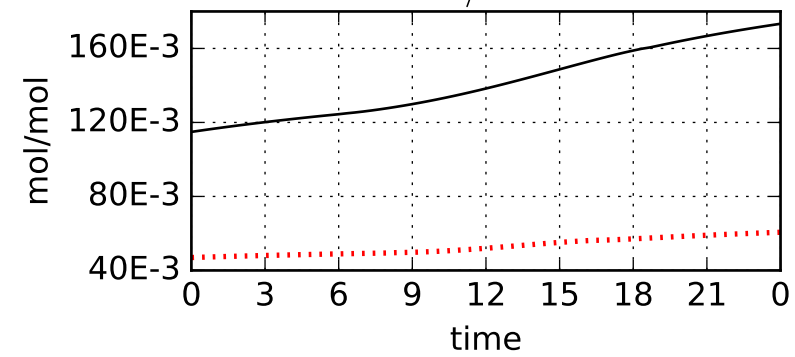

Supplement: Supplementary file 26 [file gmd-2018-201-supplement.zip]

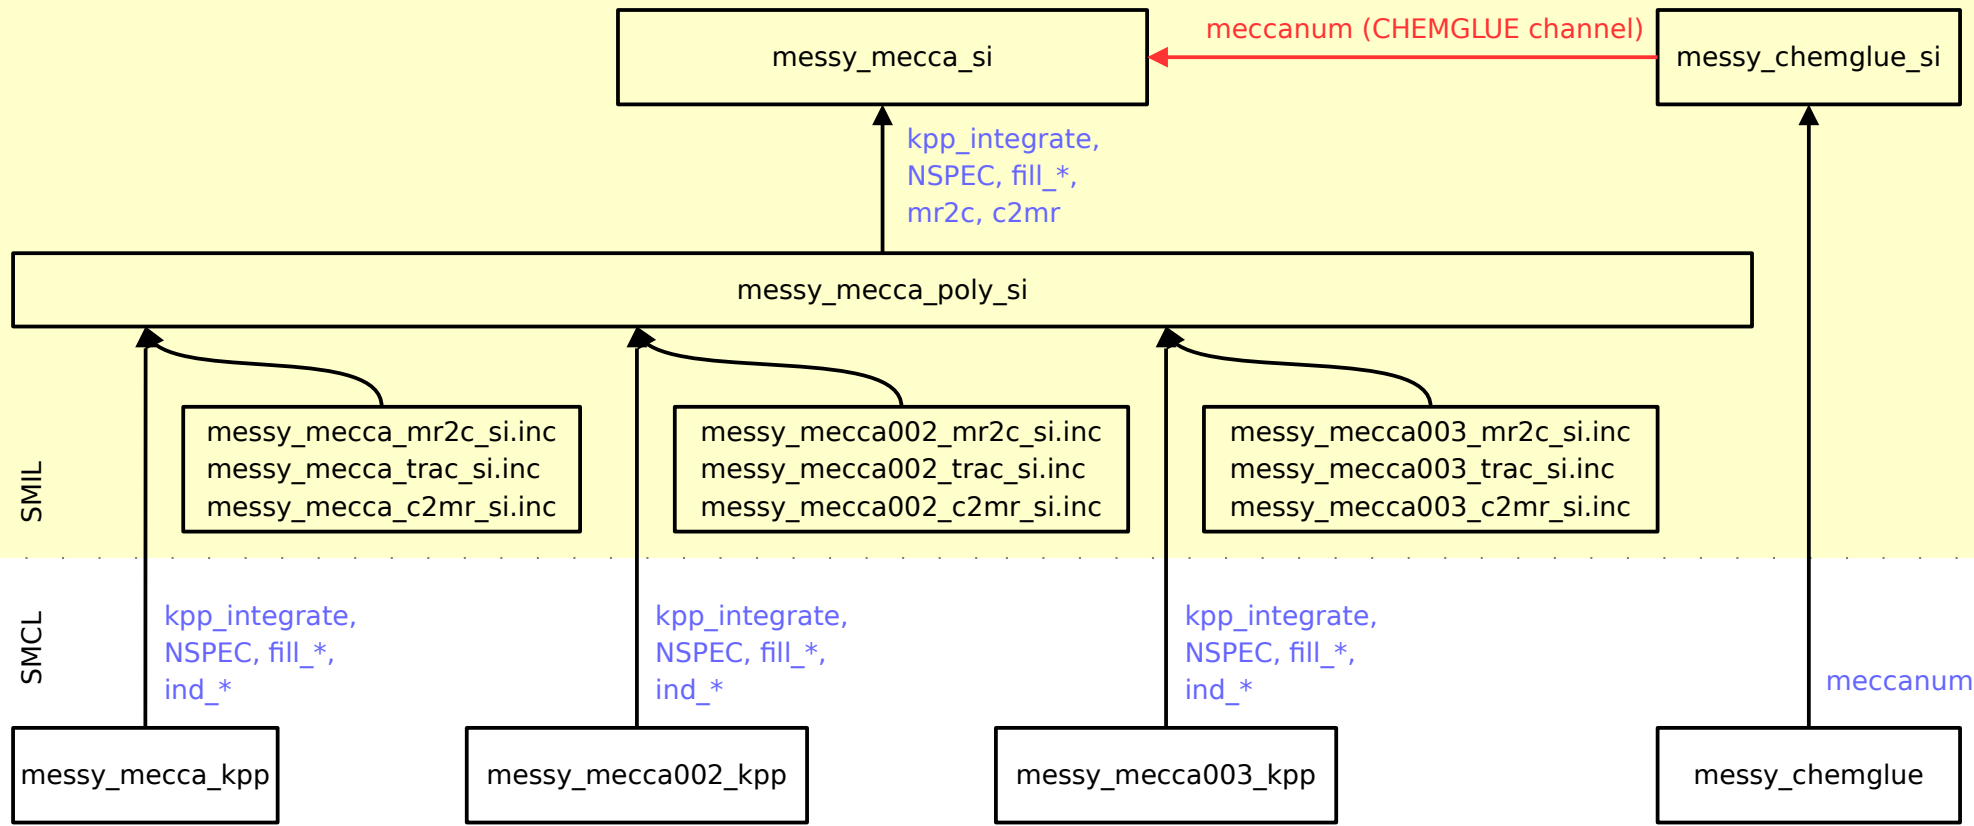

Supplement: Supplementary file 27 [file gmd-2018-201-supplement.zip]

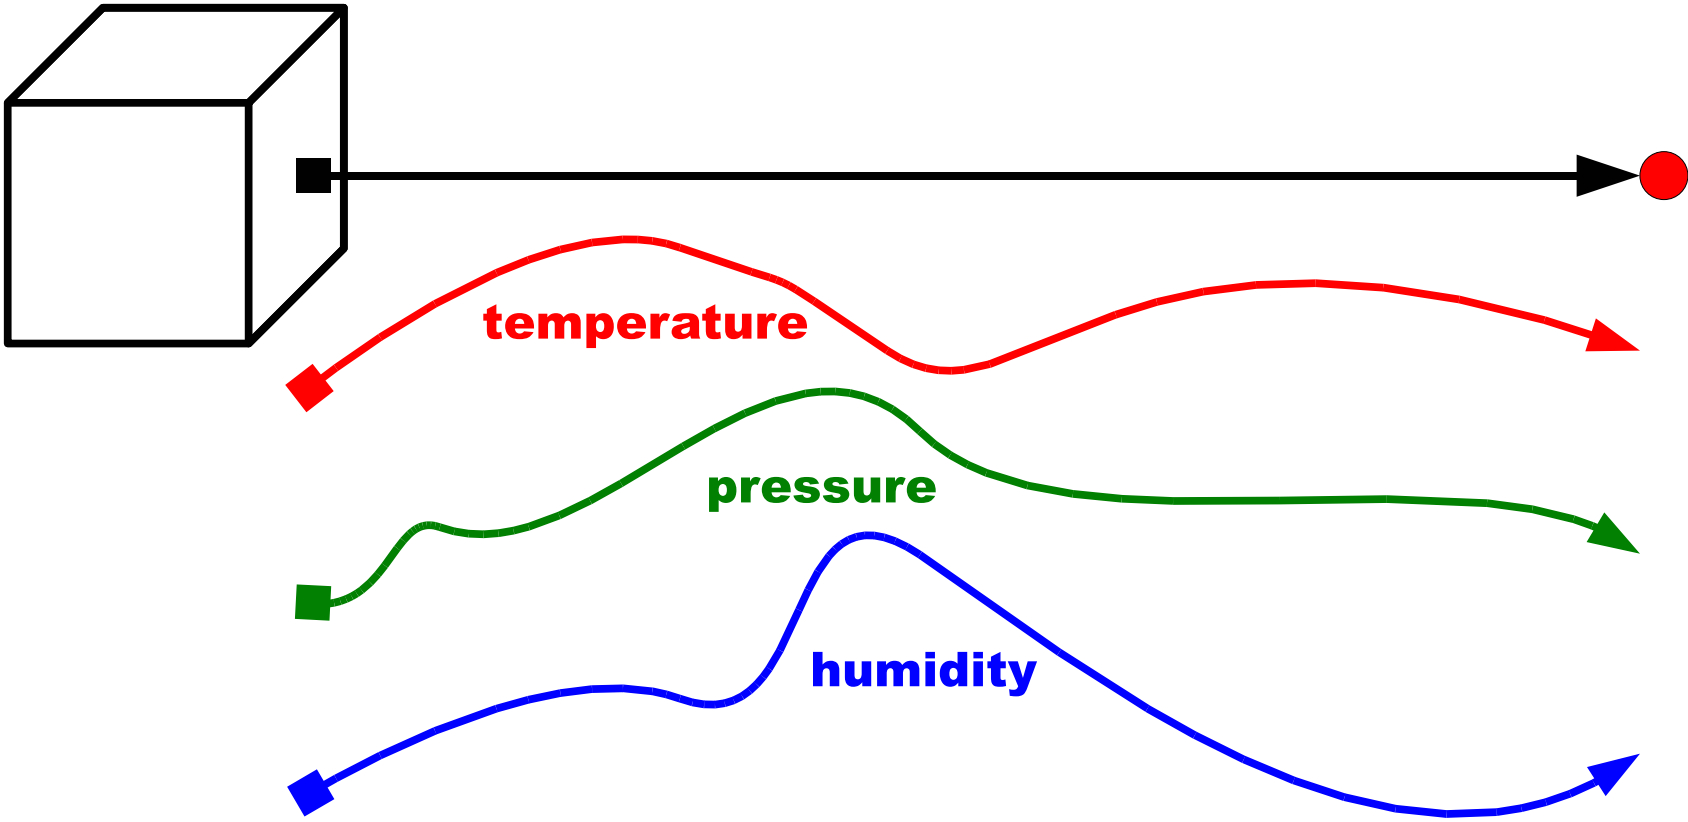

Supplement: Supplementary file 28 [file gmd-2018-201-supplement.zip]

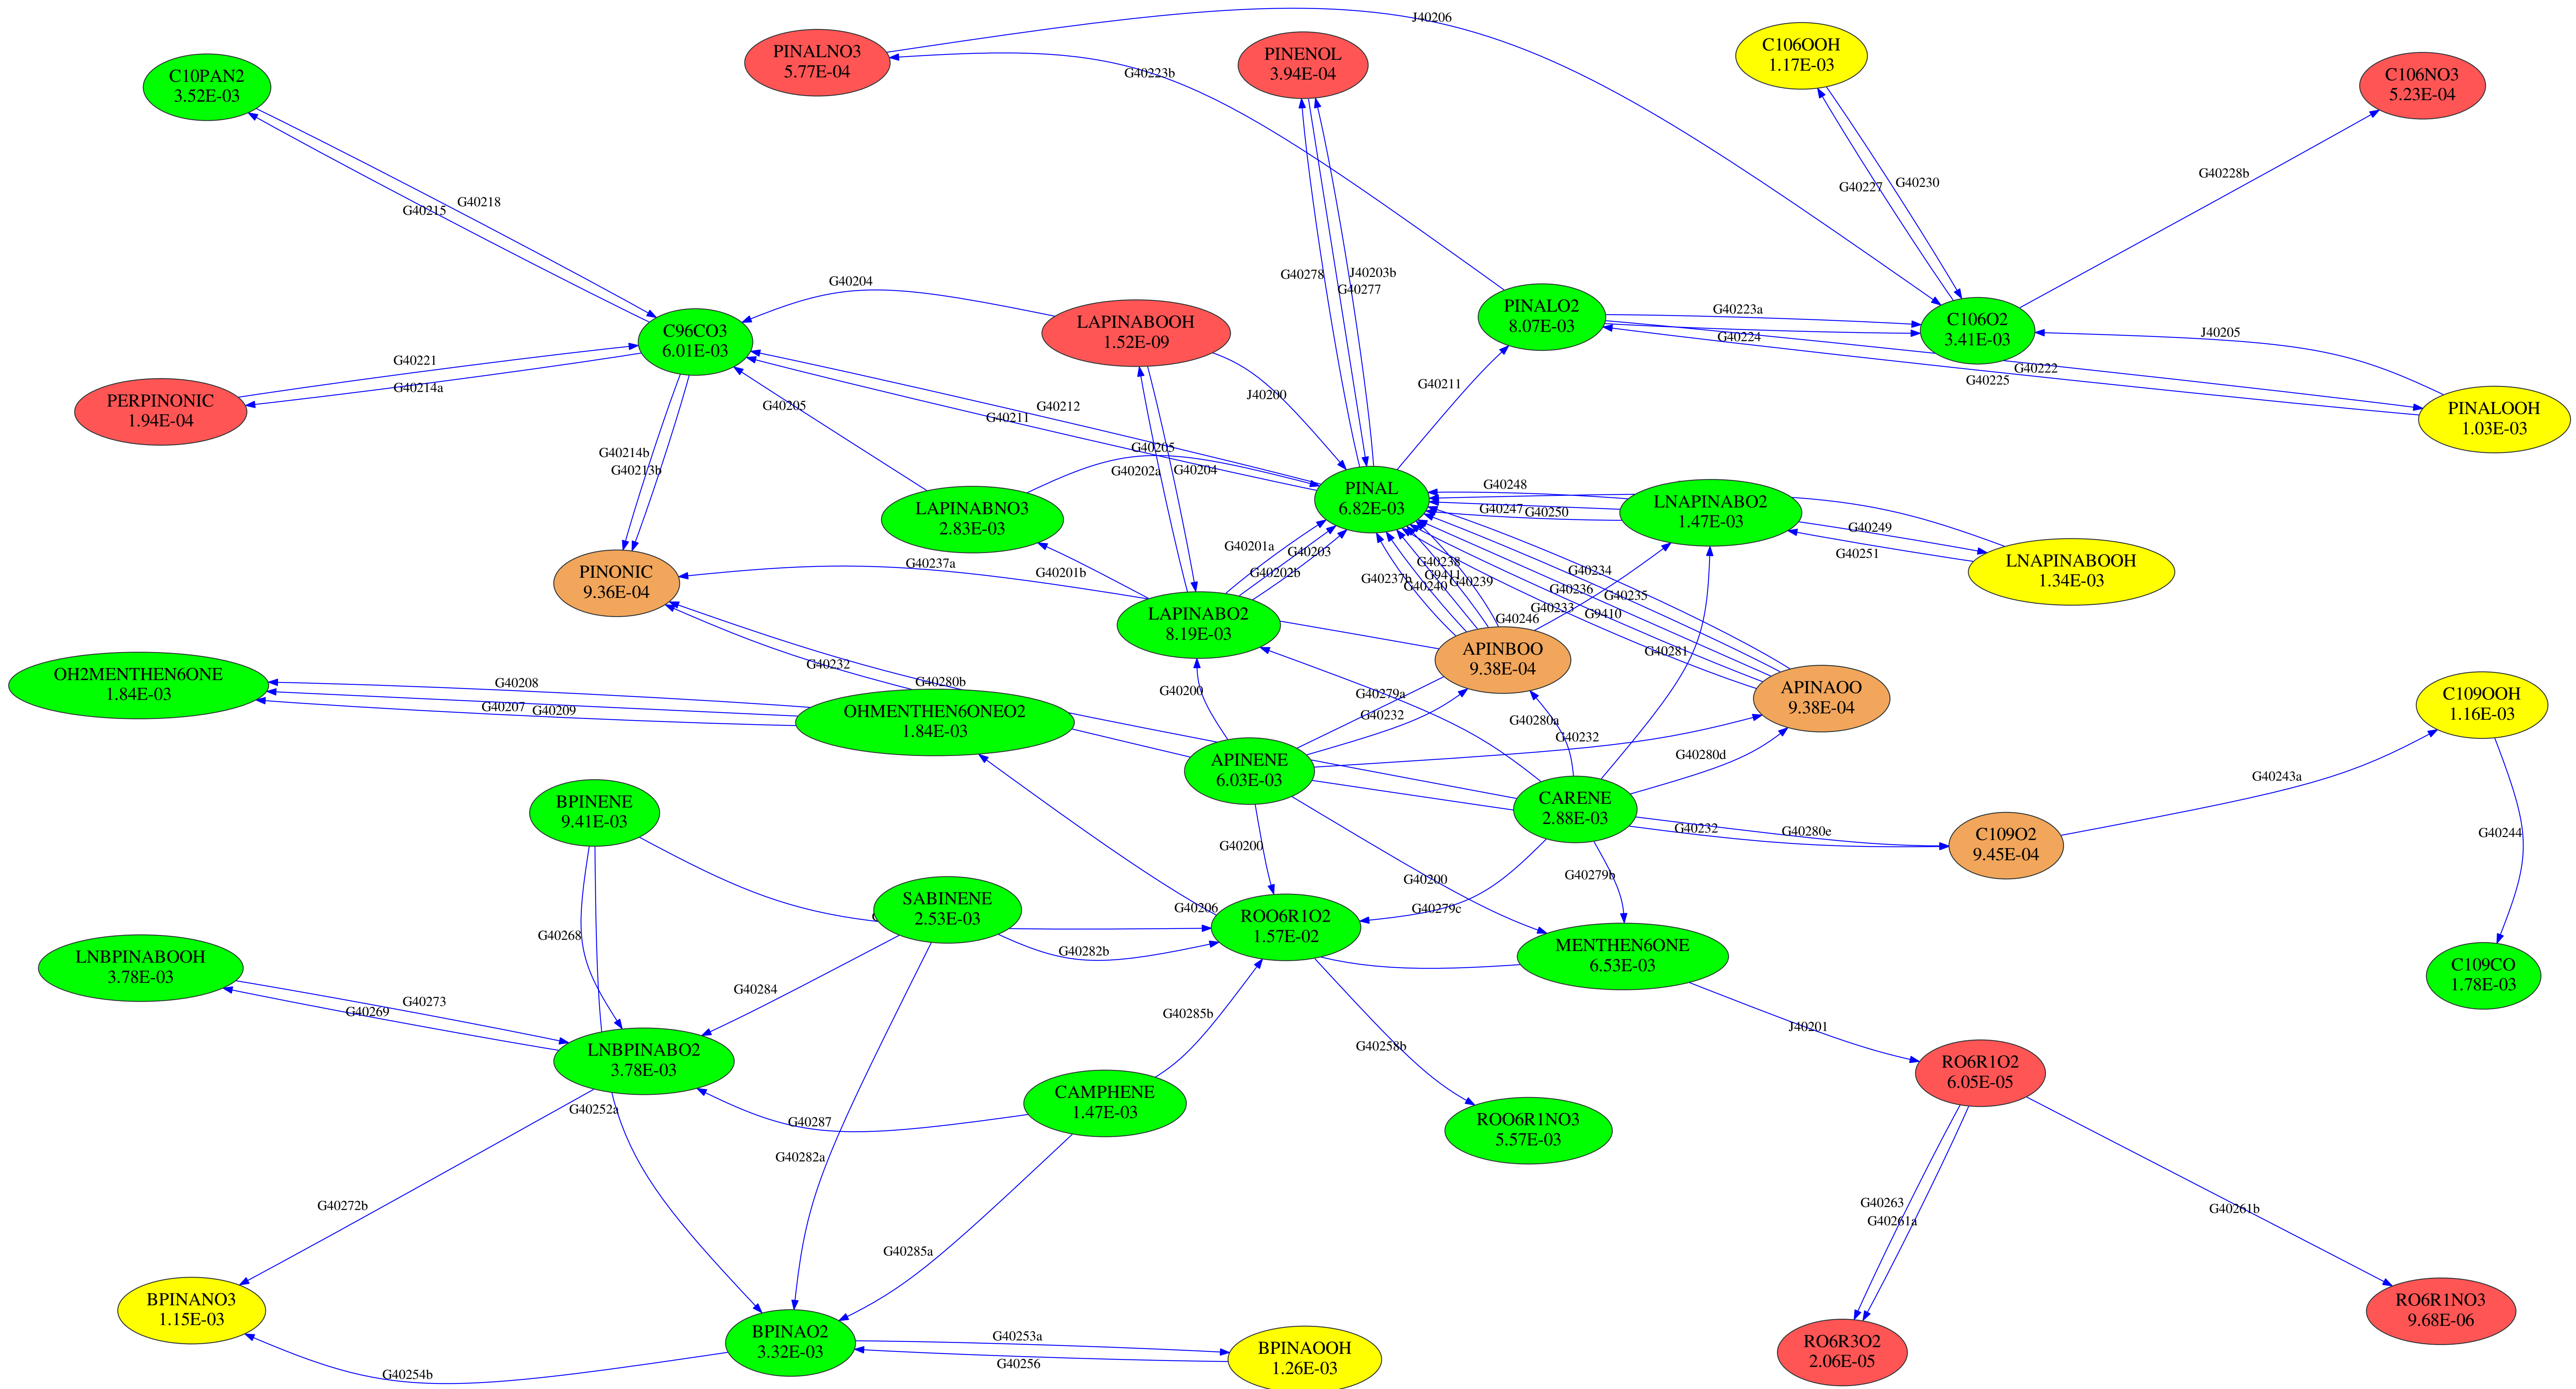

Supplement: Supplementary file 29 [file gmd-2018-201-supplement.zip]

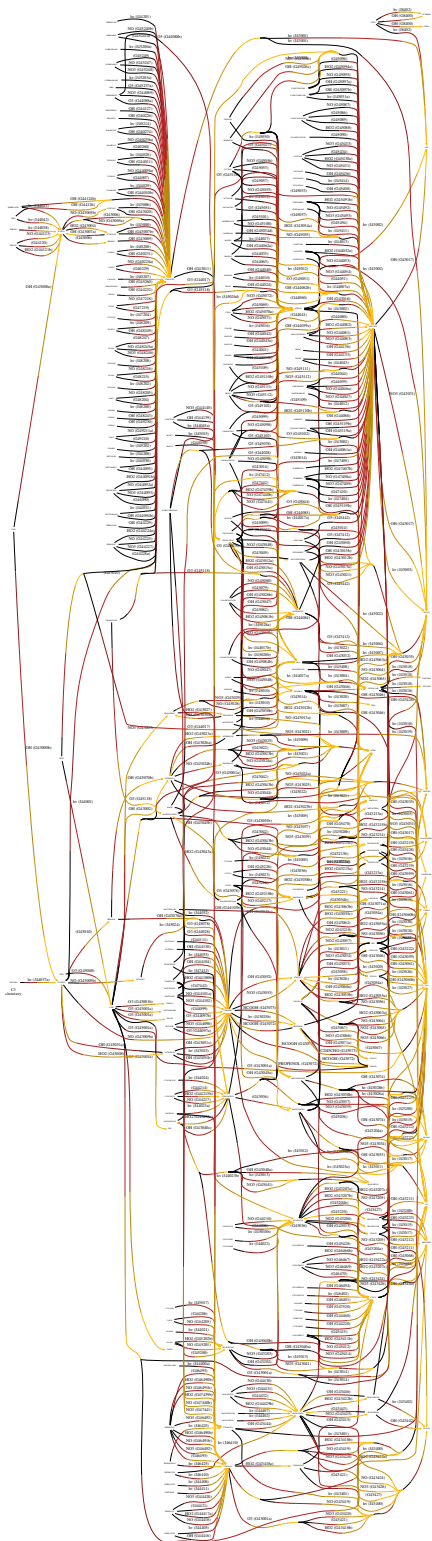

Supplement: Supplementary file 30 [file gmd-2018-201-supplement.zip]

$O_3$ 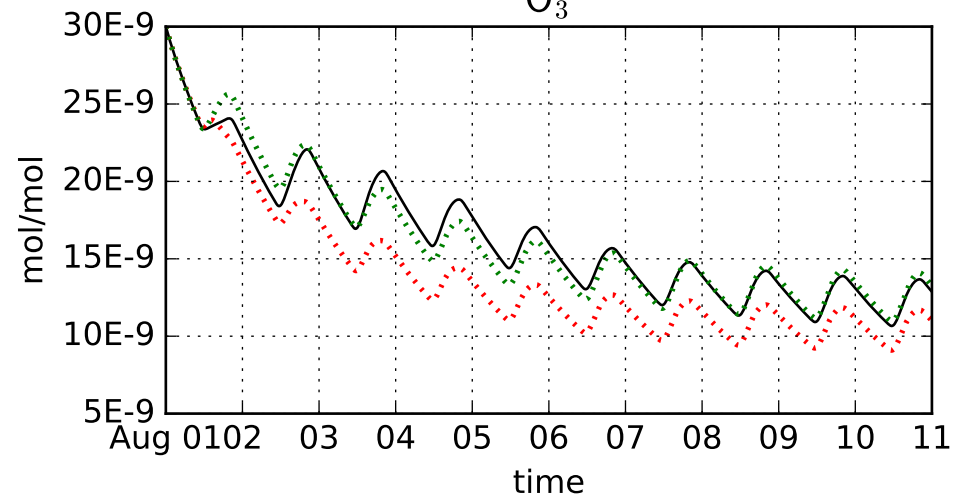

OH

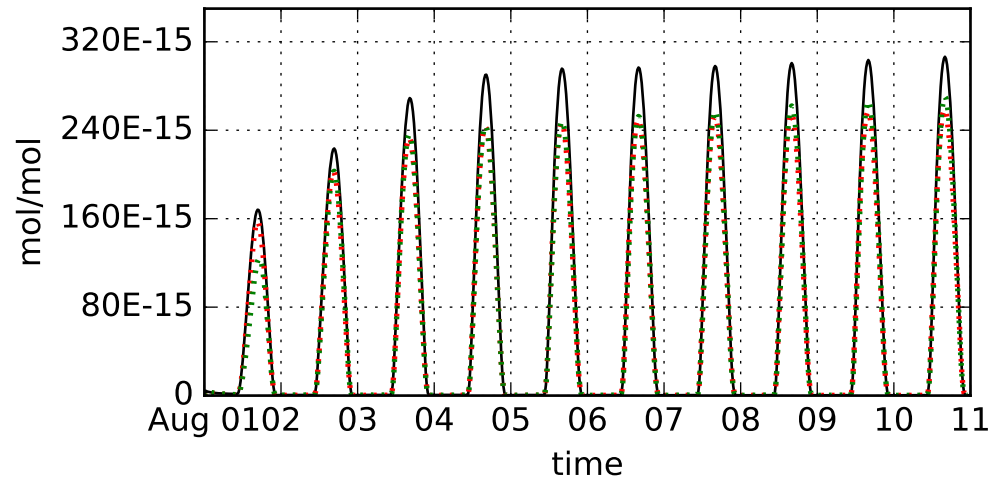 $NO_2$ 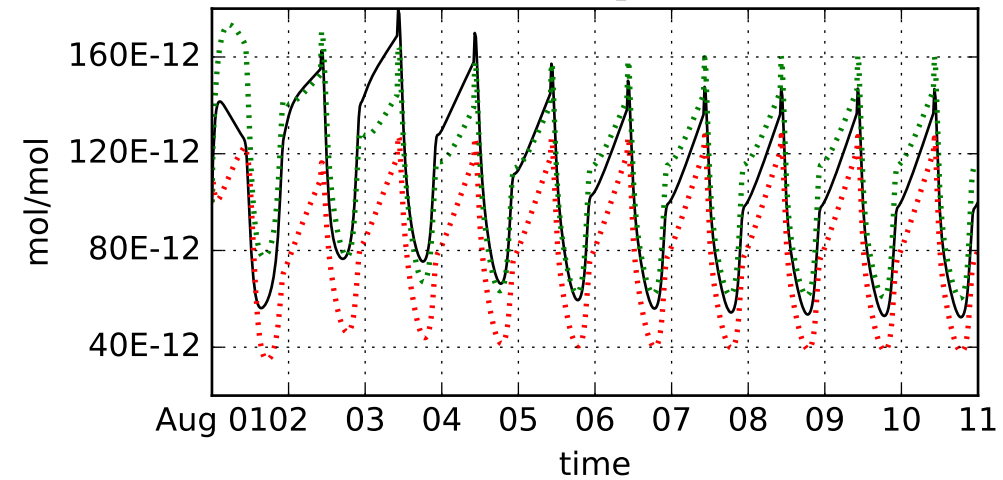

PAN

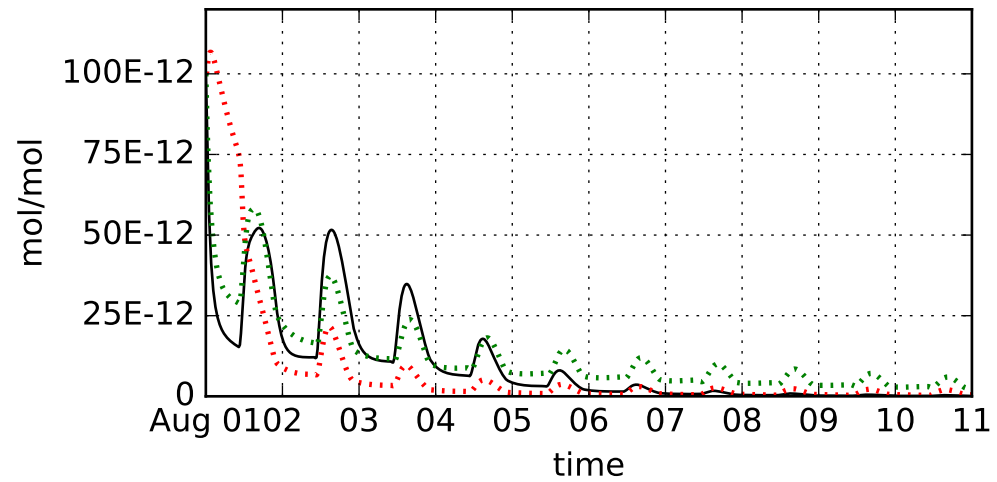 $C_5H_8$ 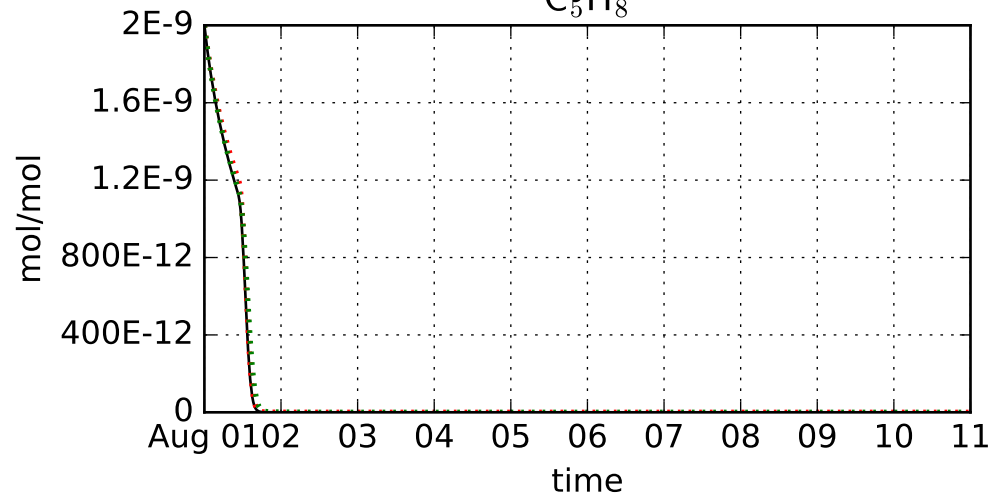

terpenes

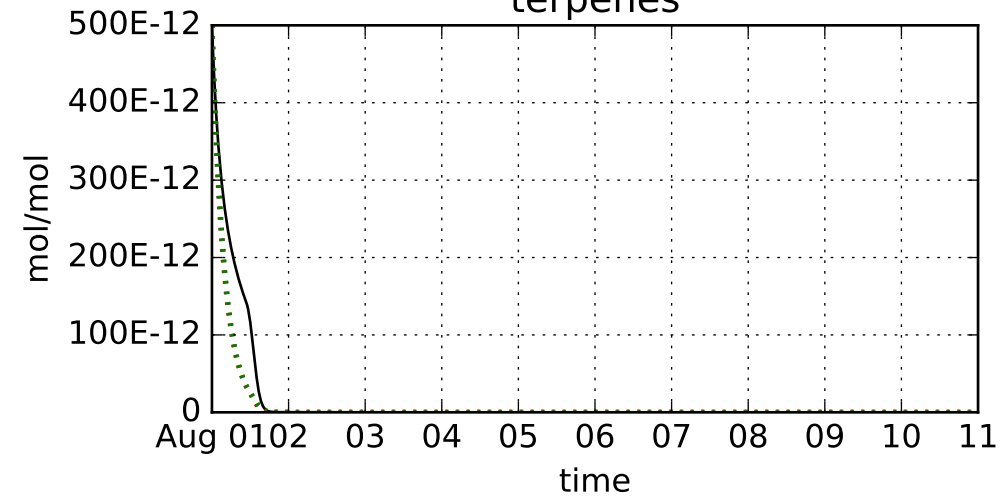

Supplement: Supplementary file 31 [file gmd-2018-201-supplement.zip]

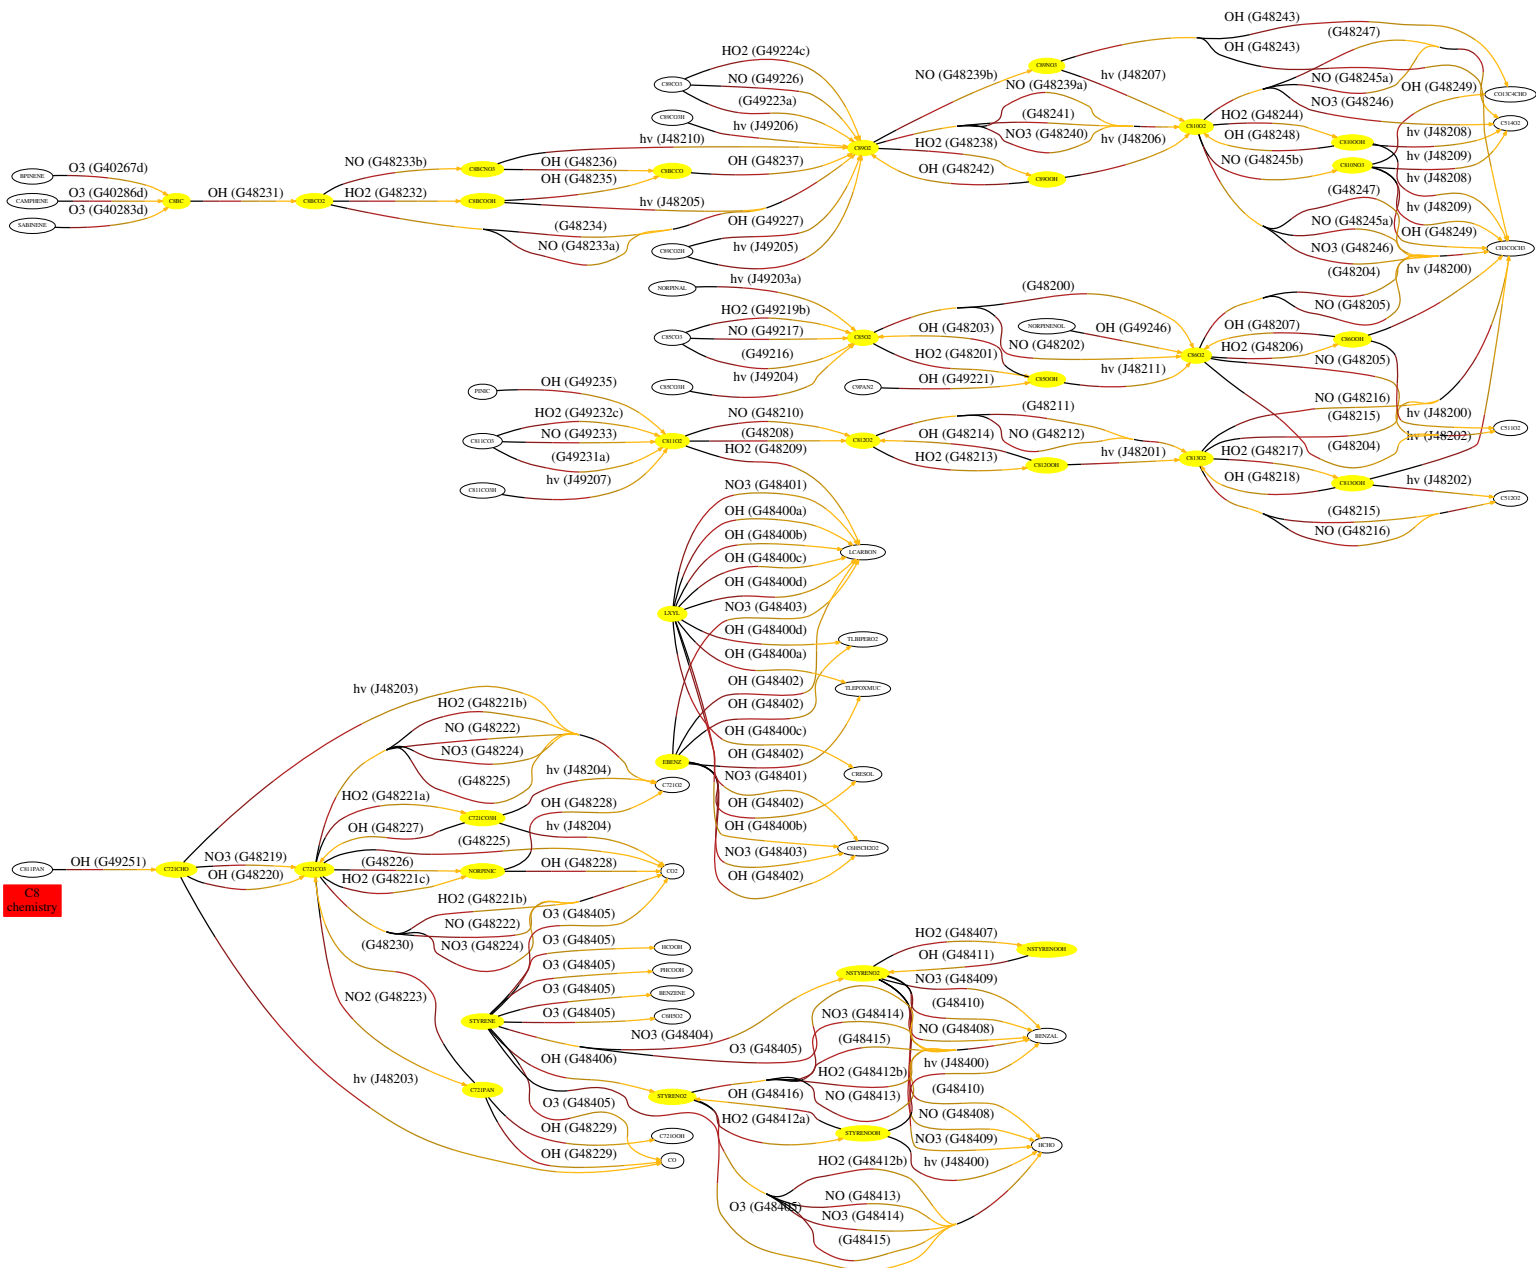

Supplement: Supplementary file 32 [file gmd-2018-201-supplement.zip]

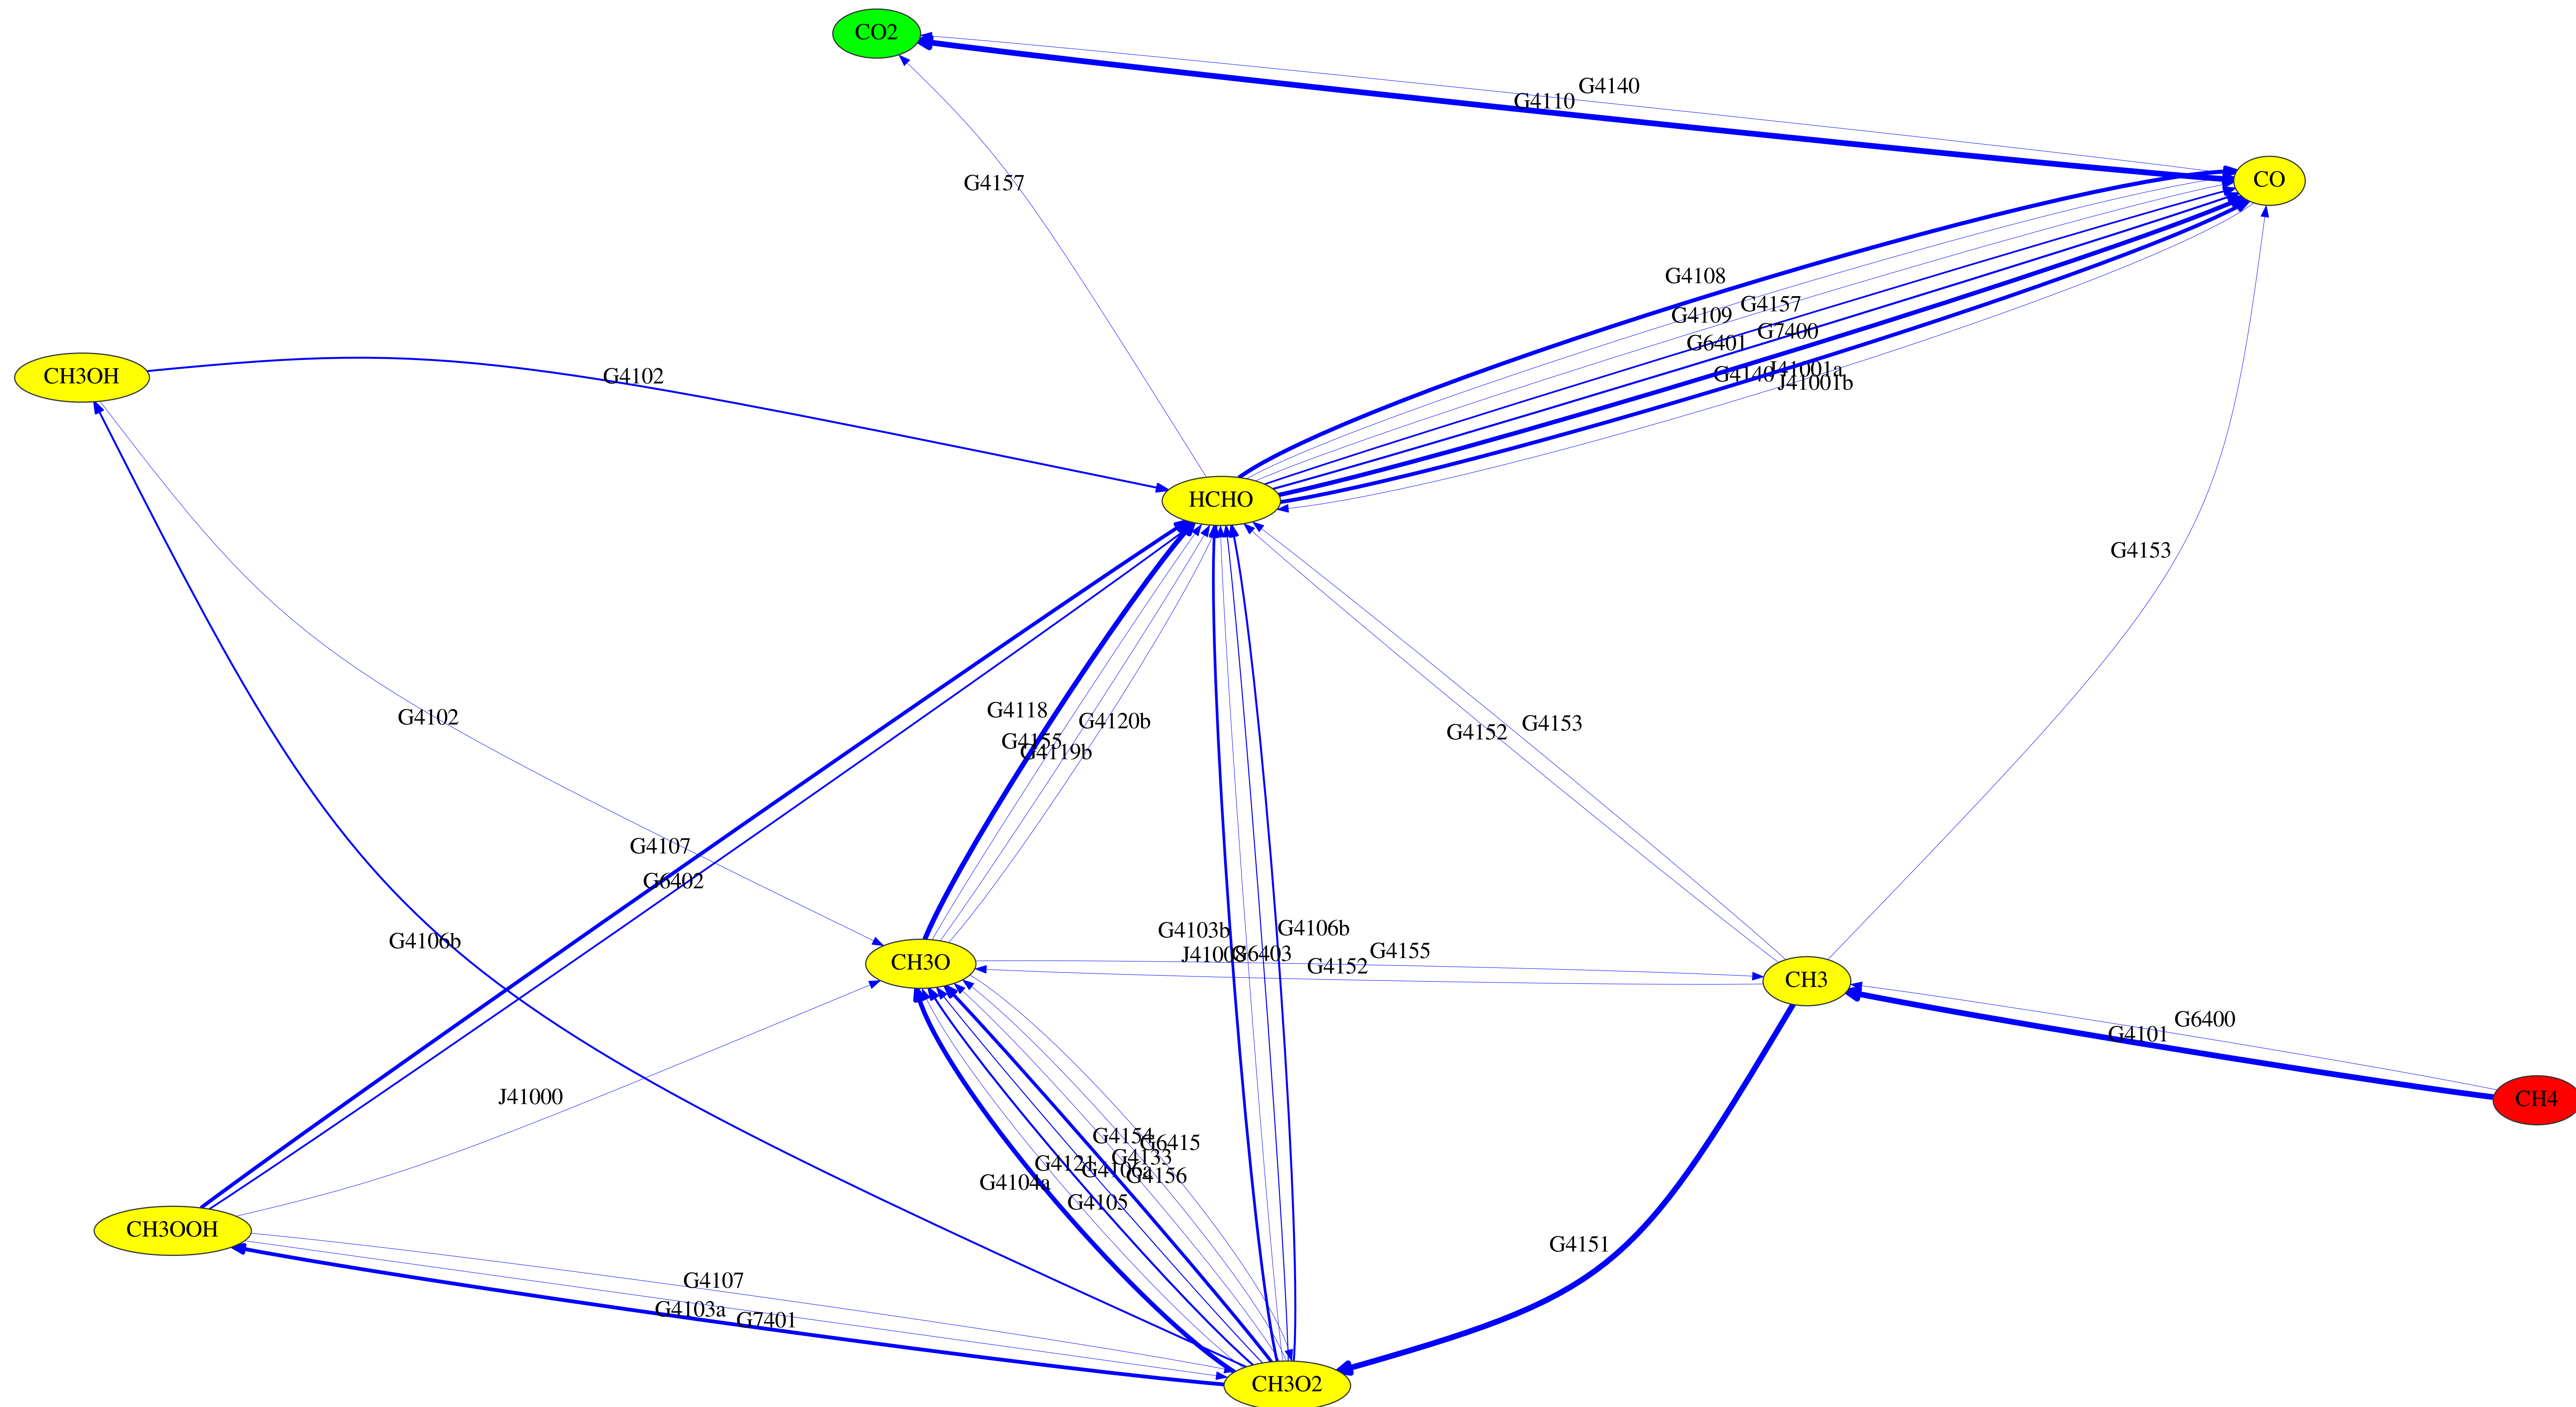

Supplement: Supplementary file 33 [file gmd-2018-201-supplement.zip]

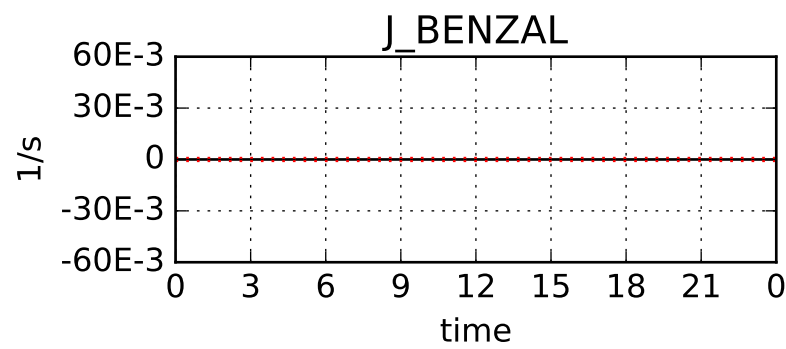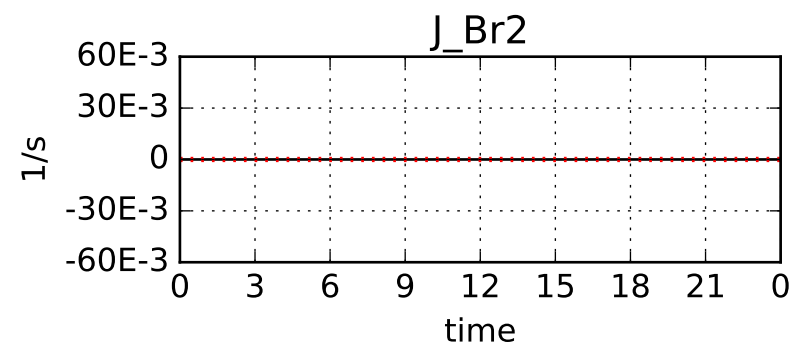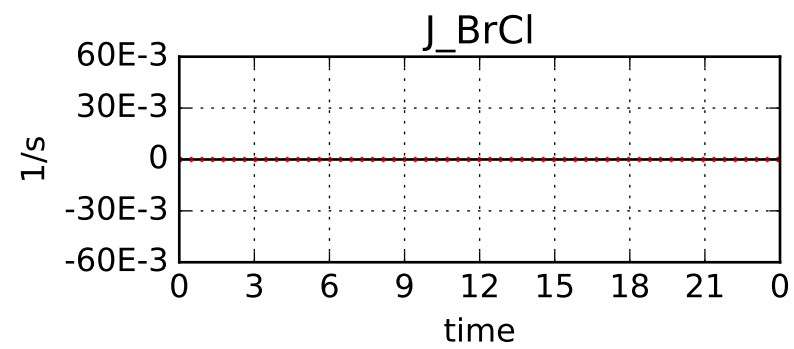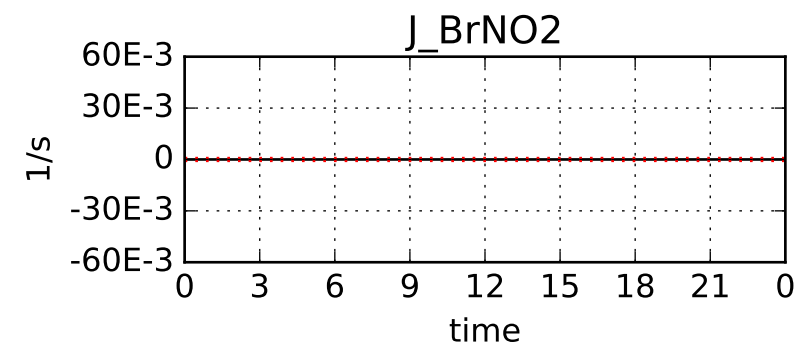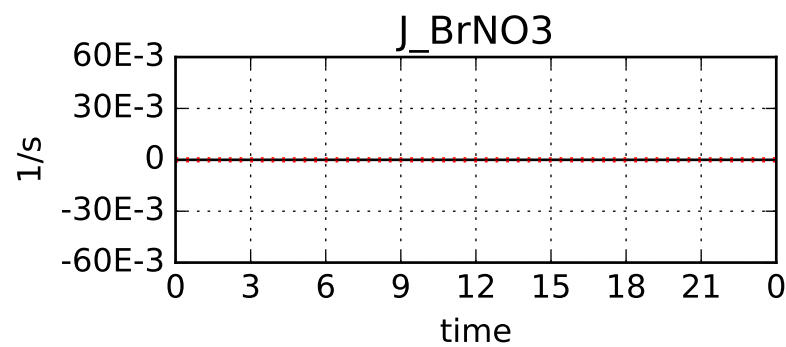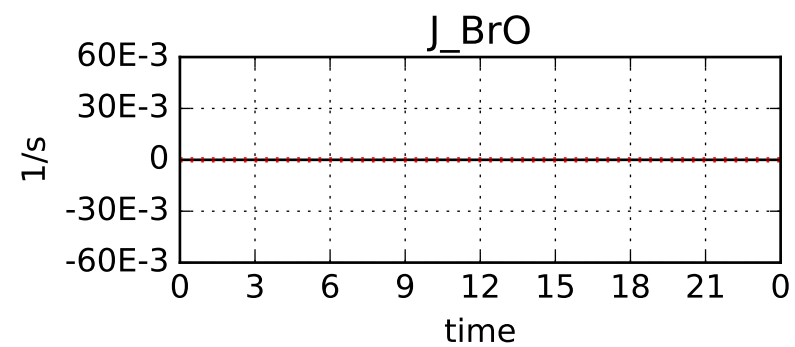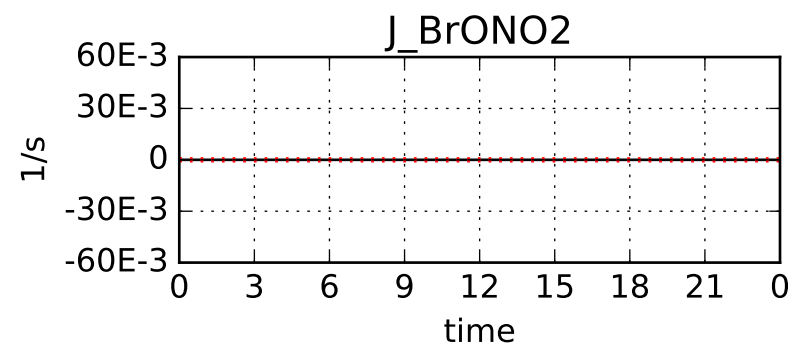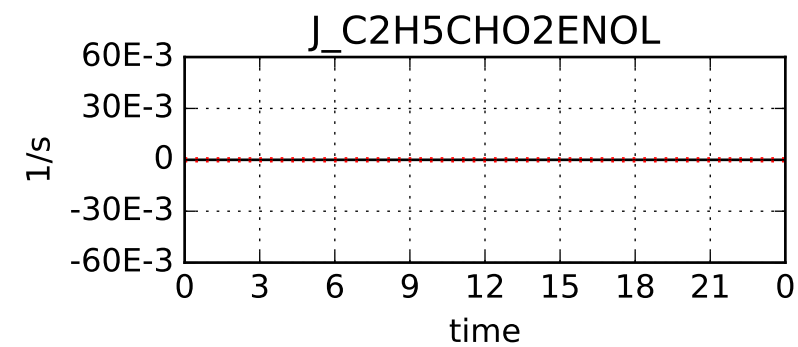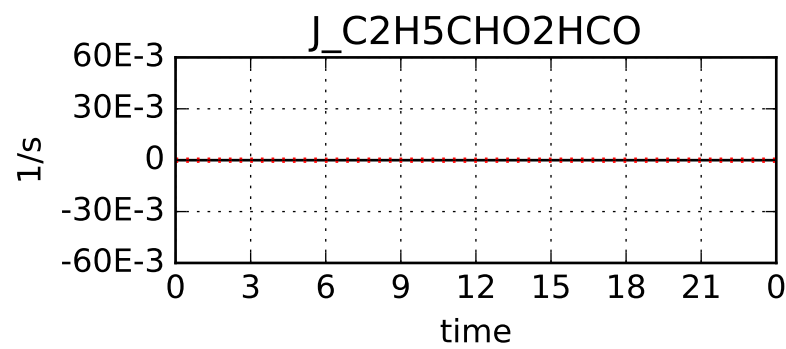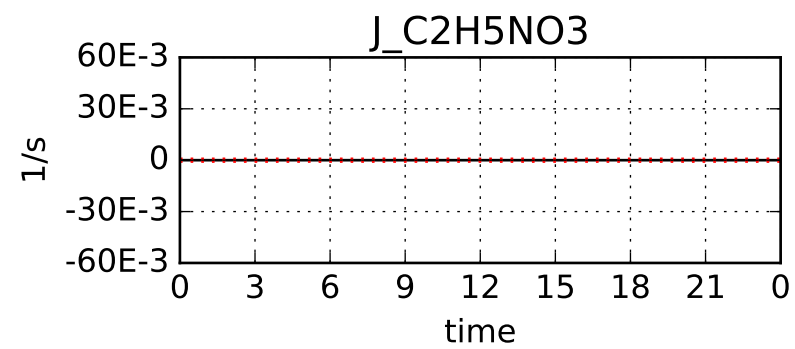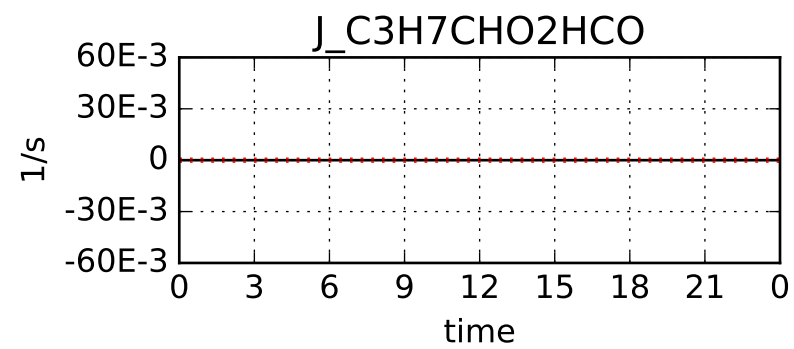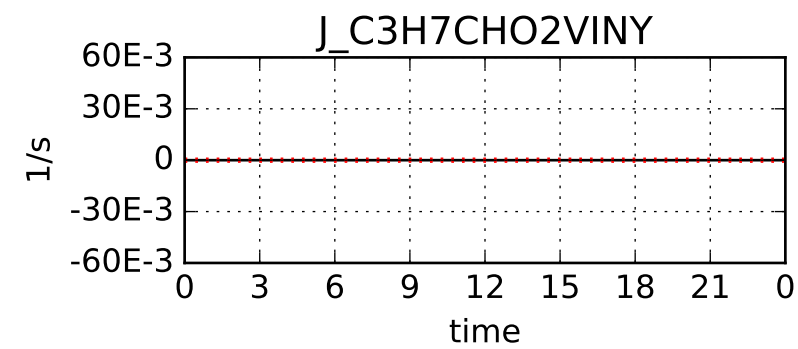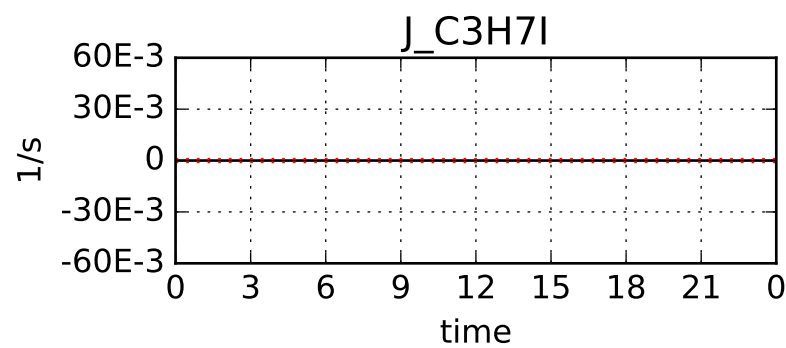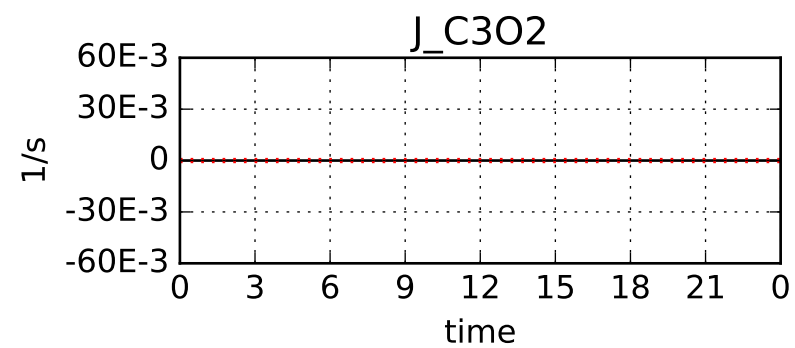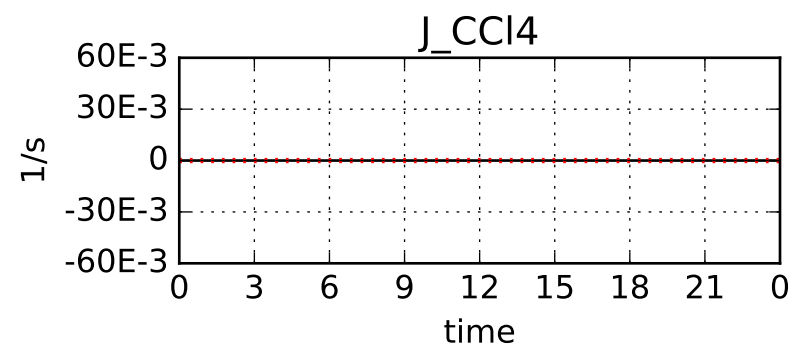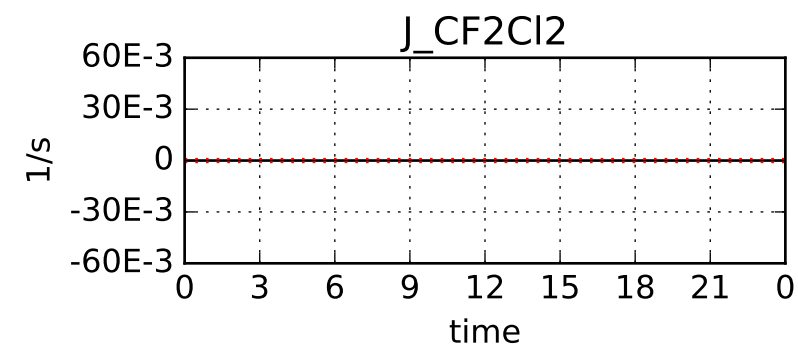

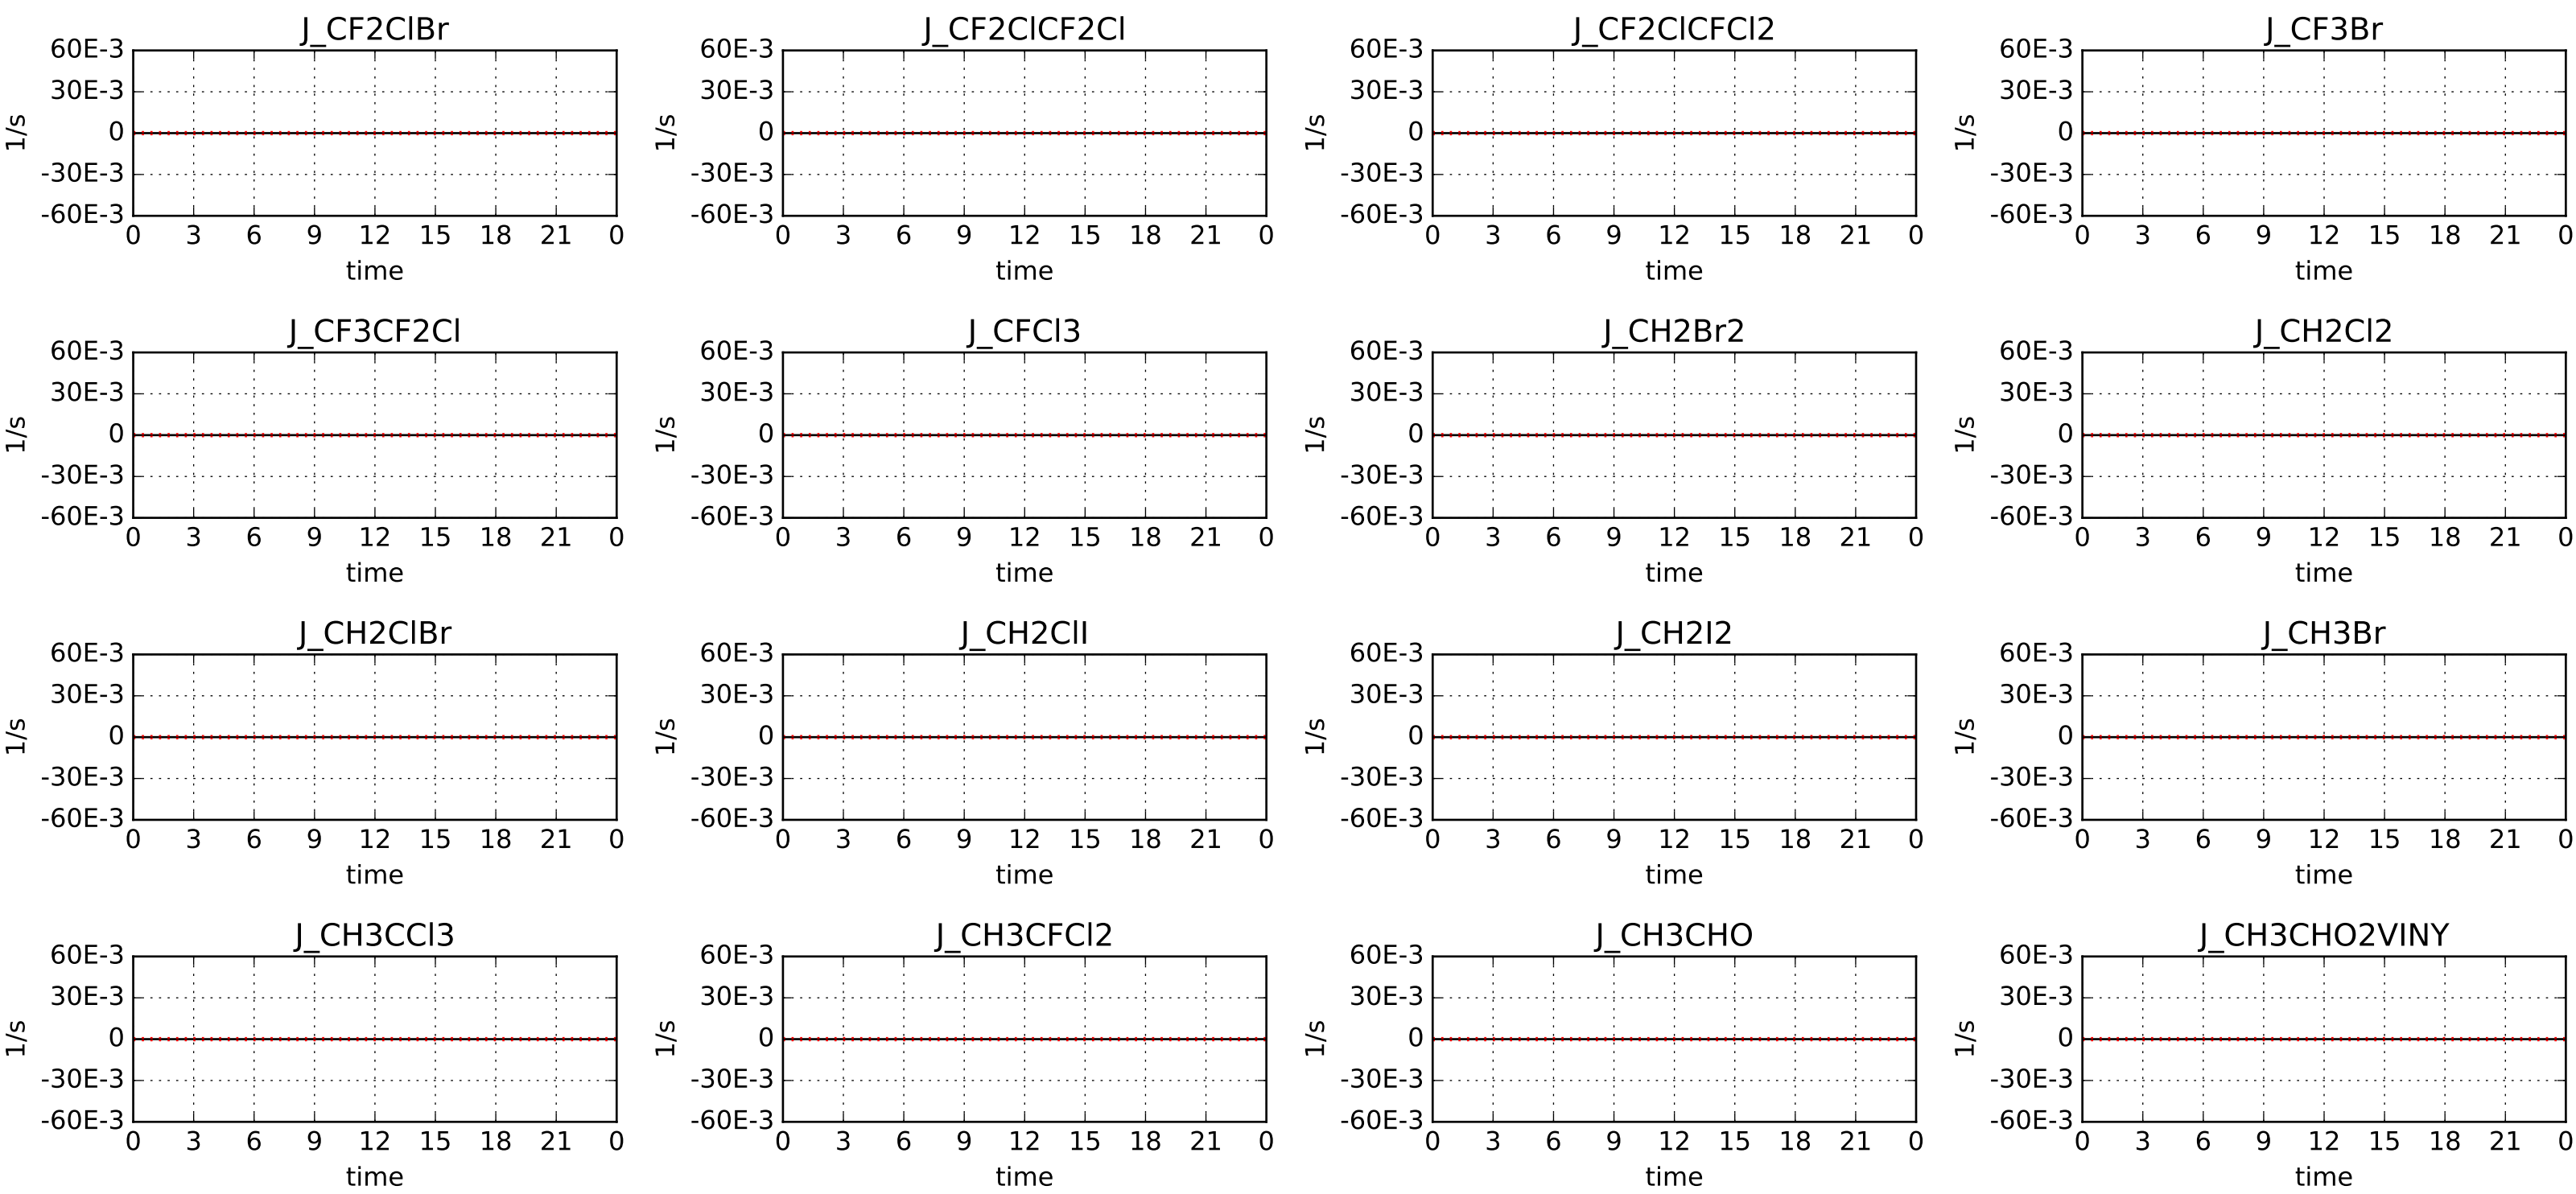

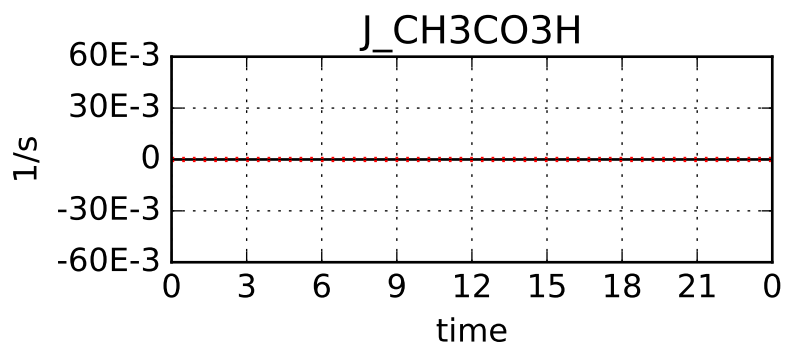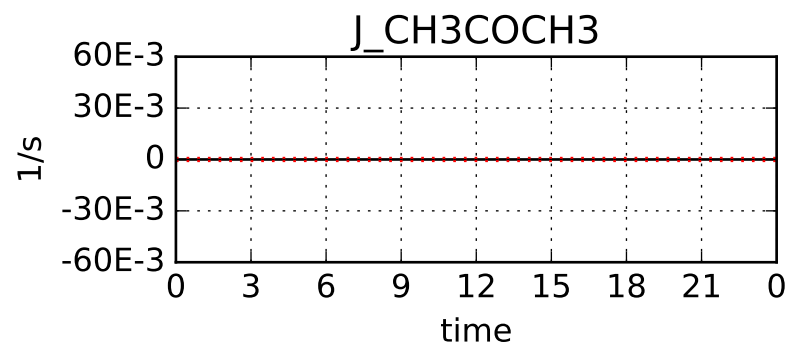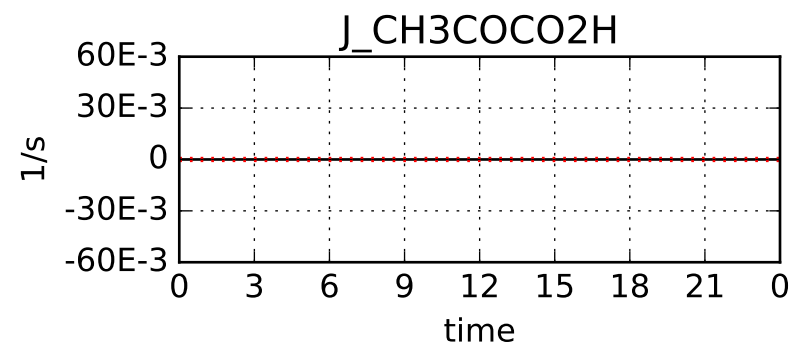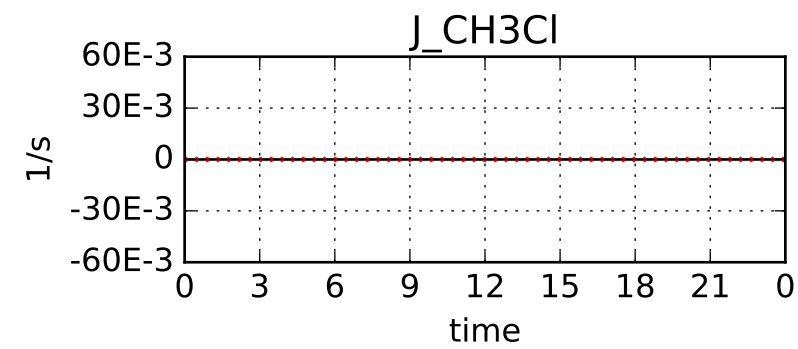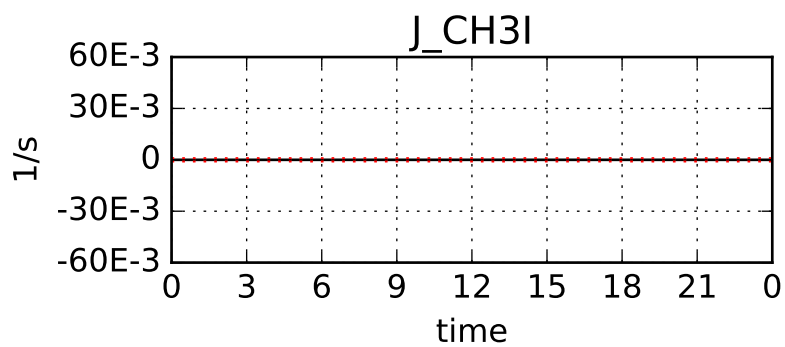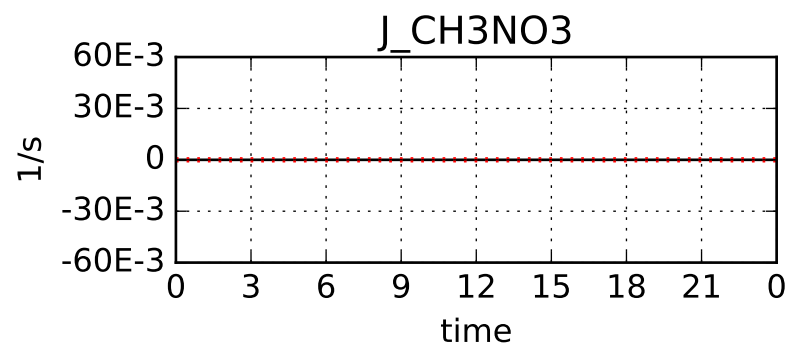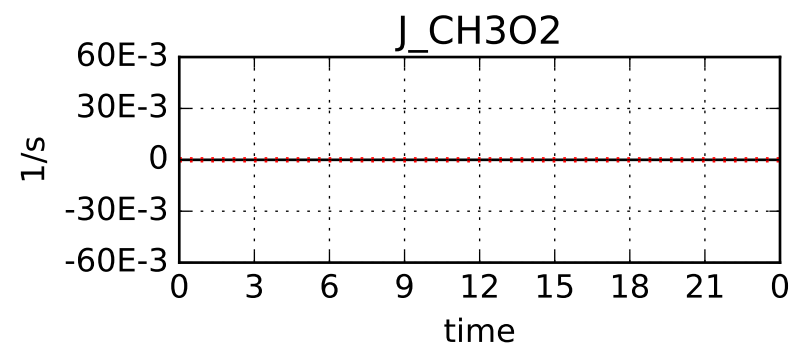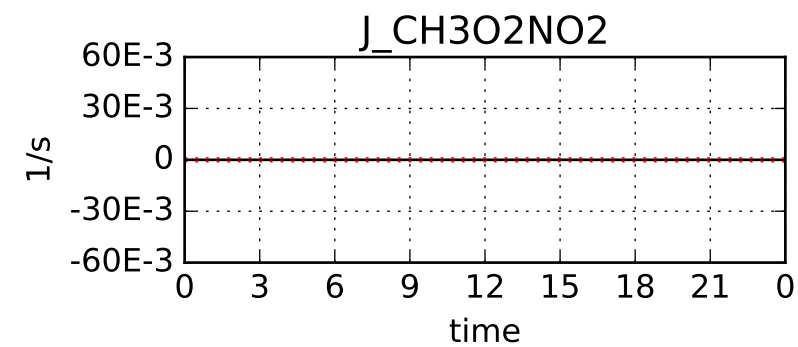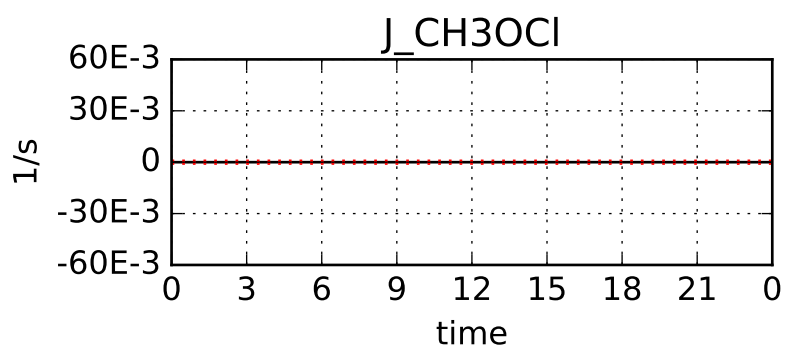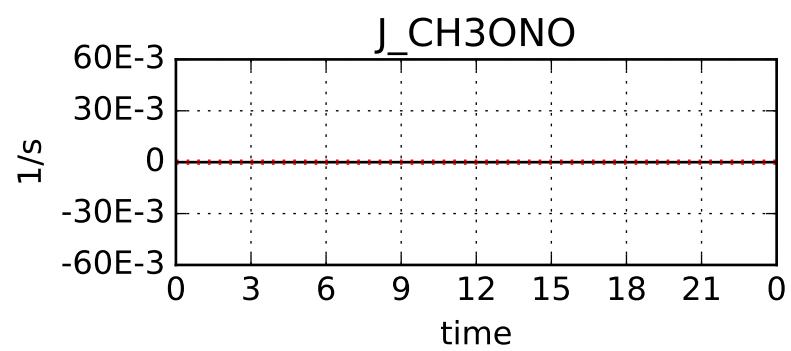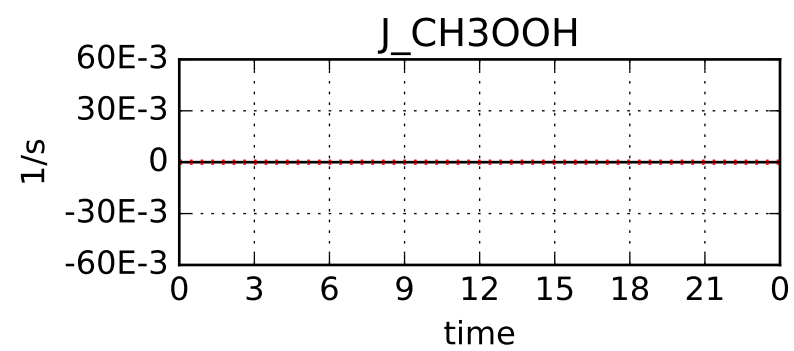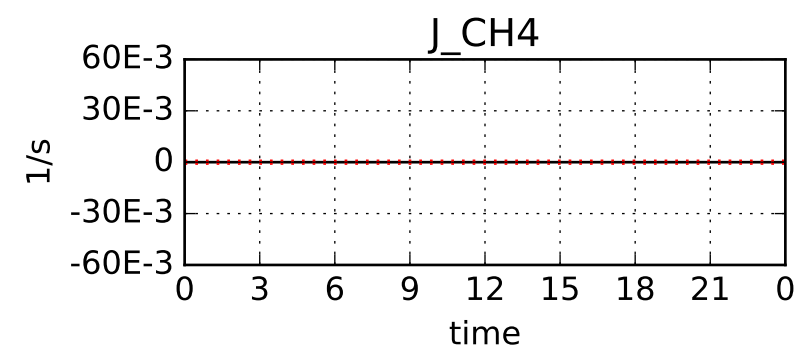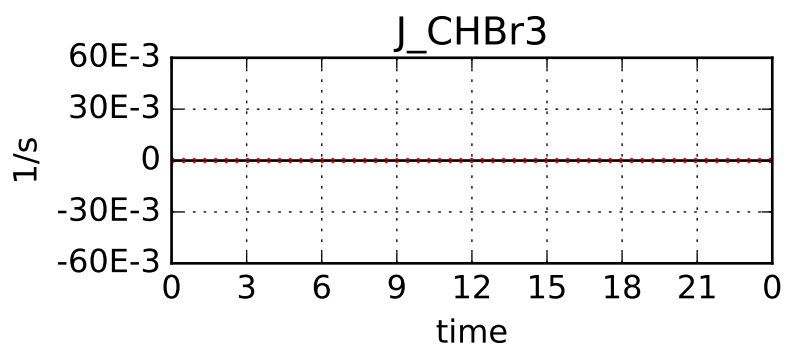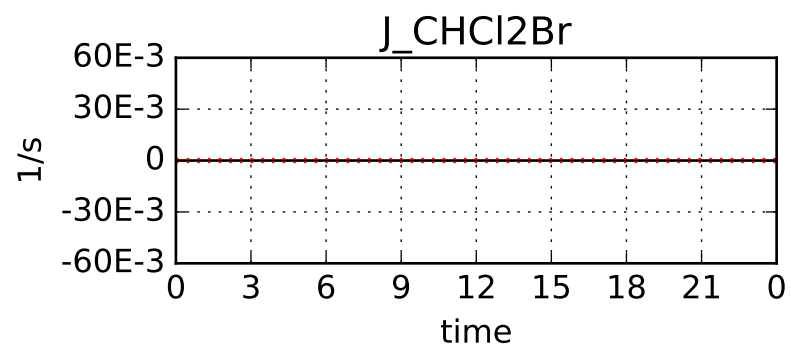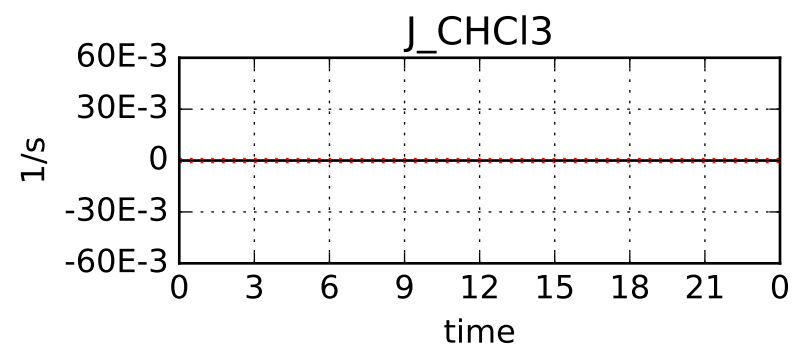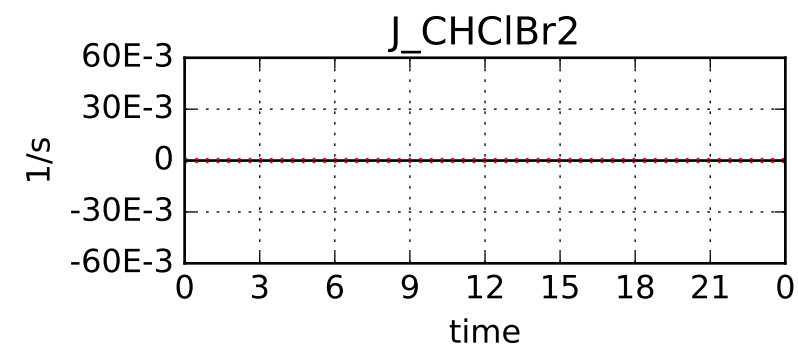

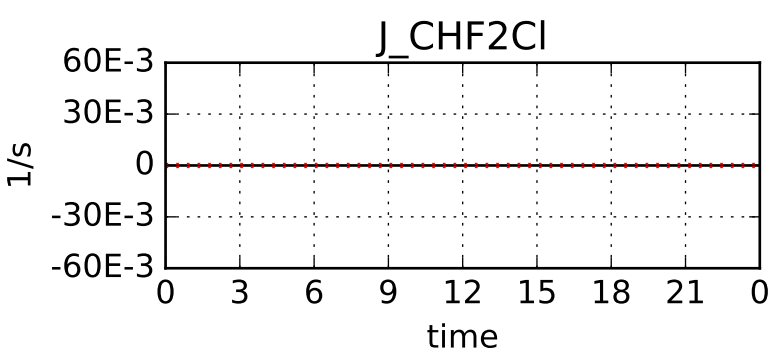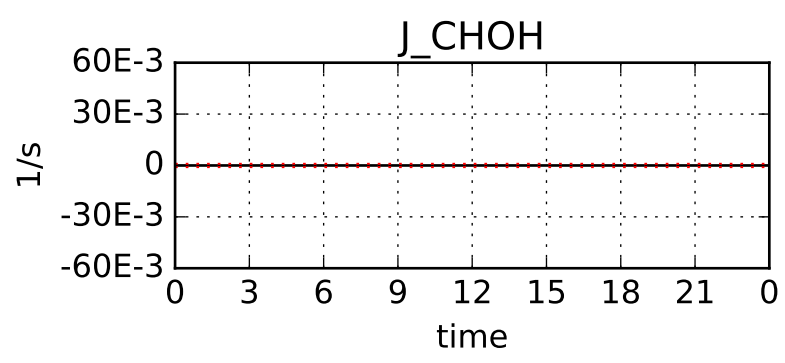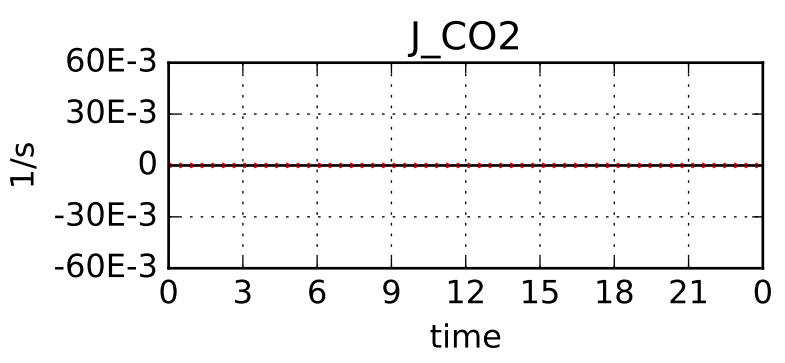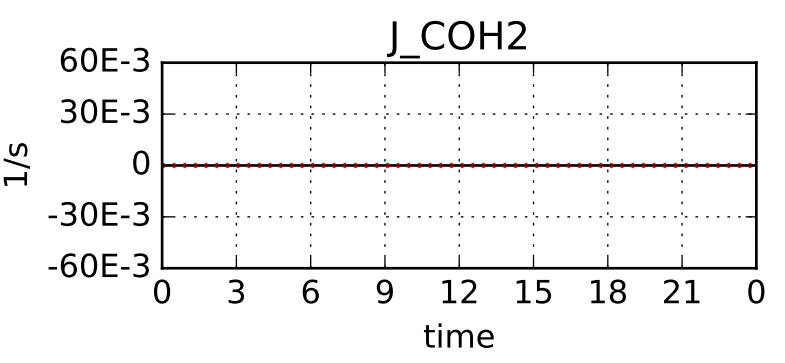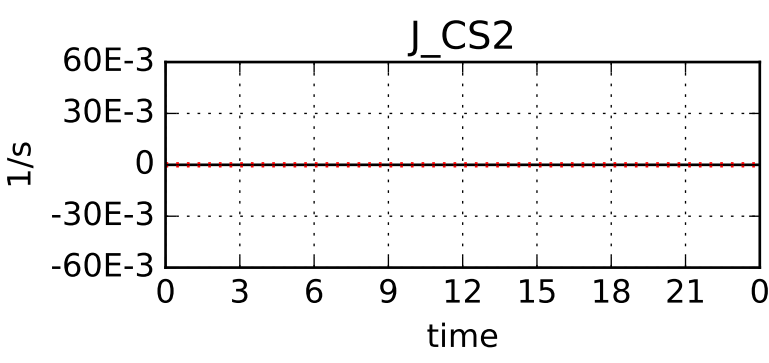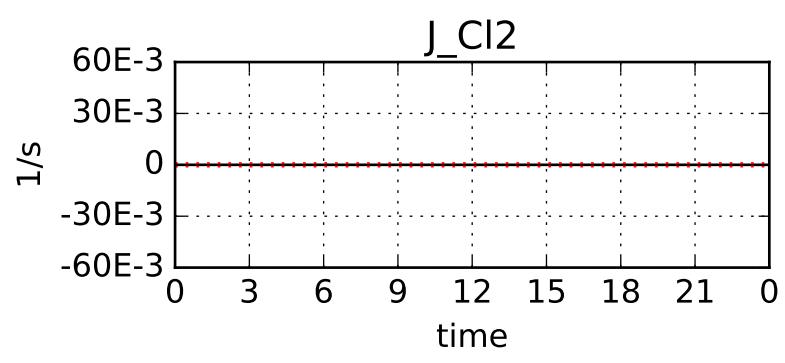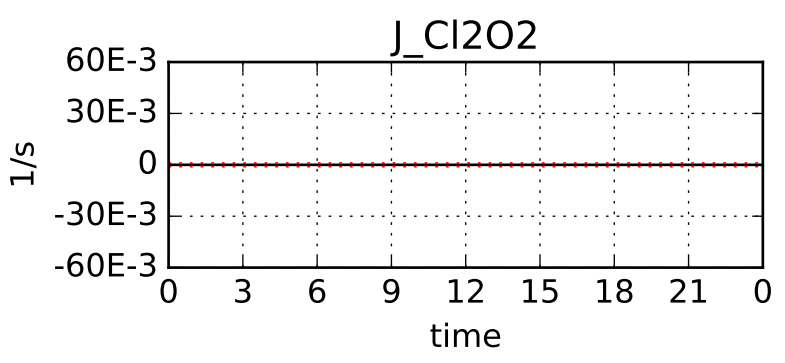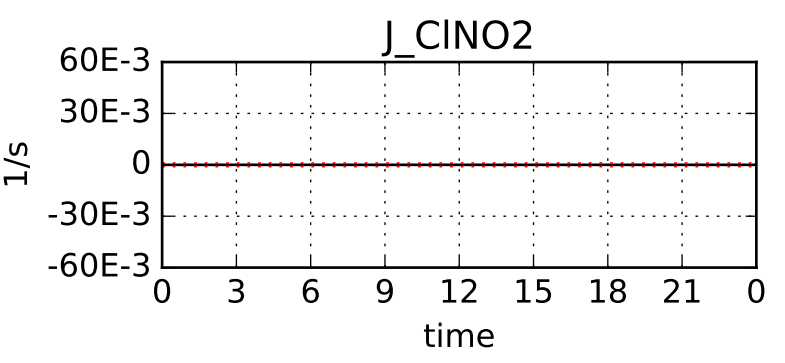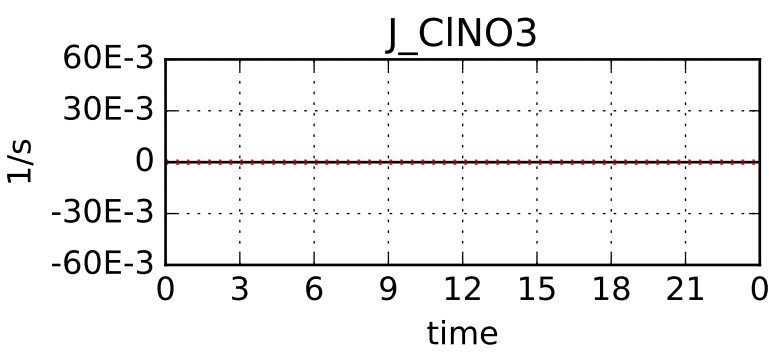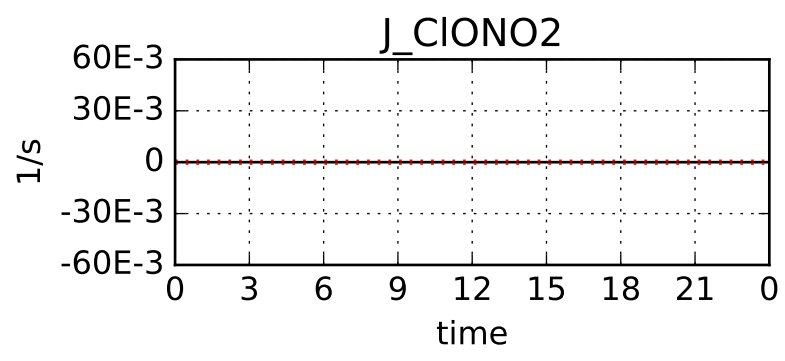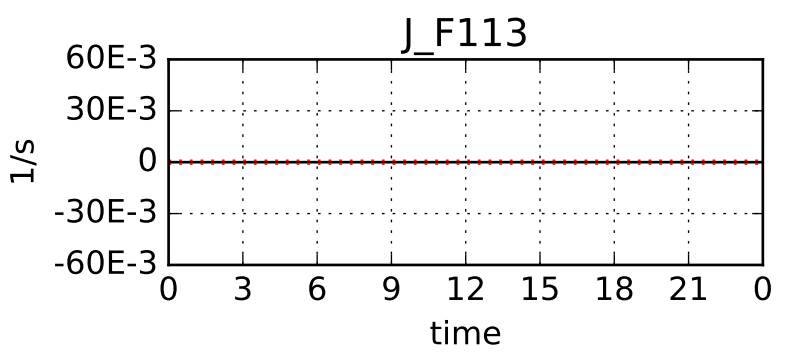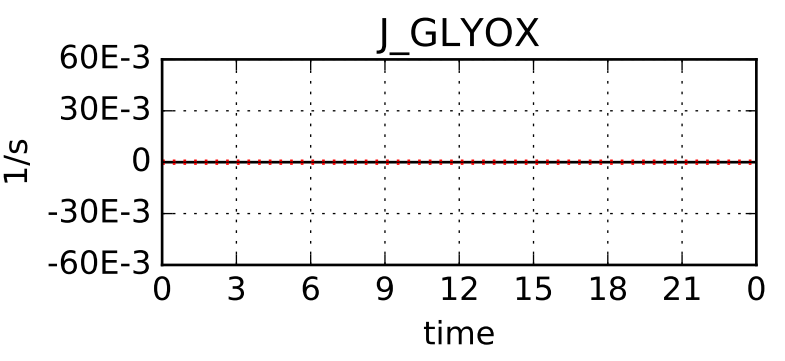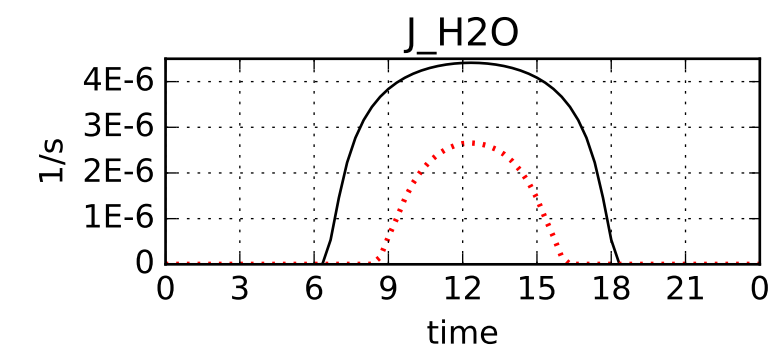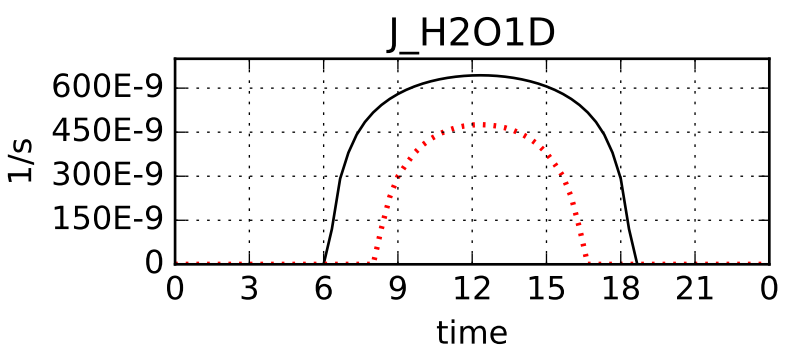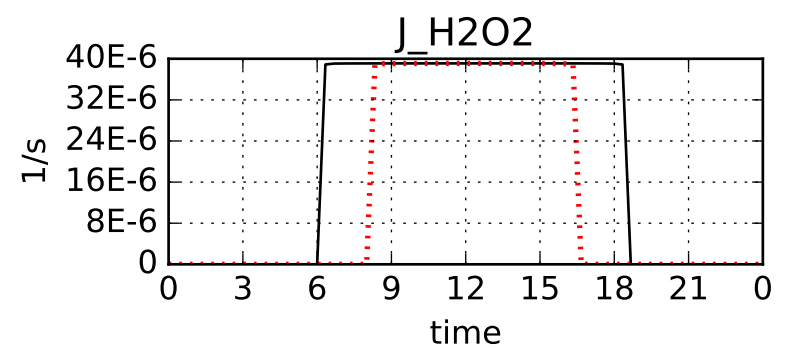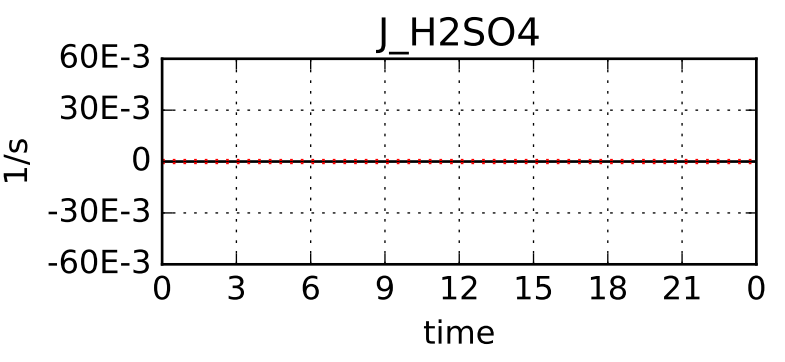

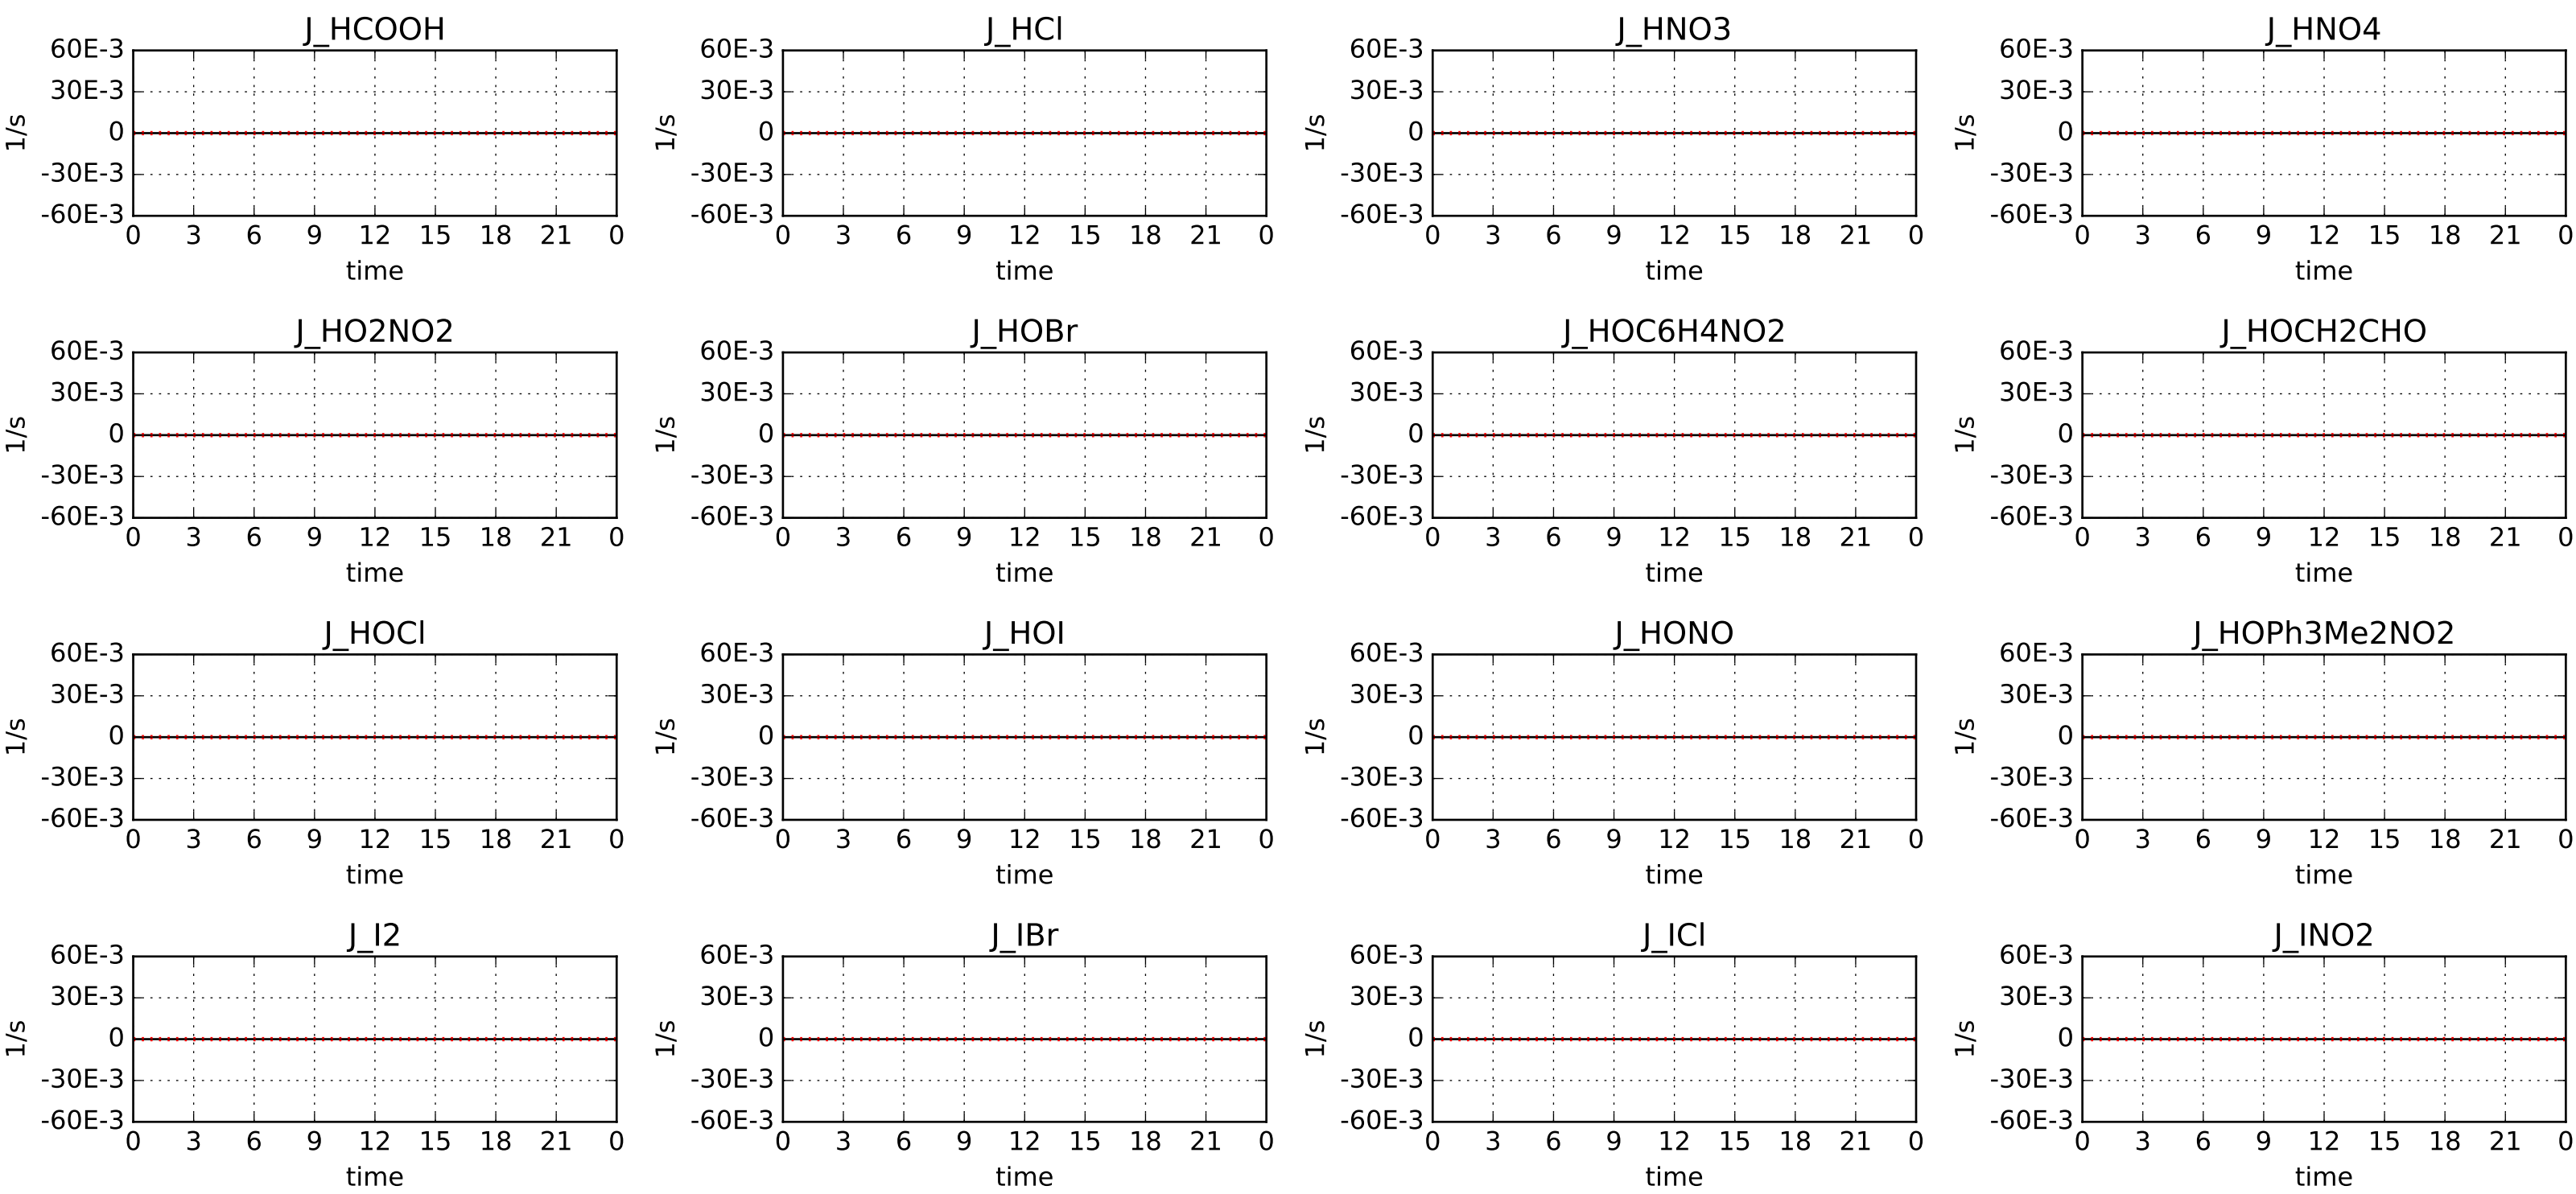

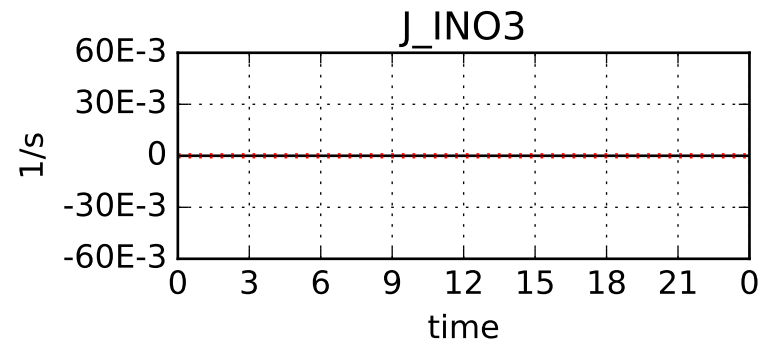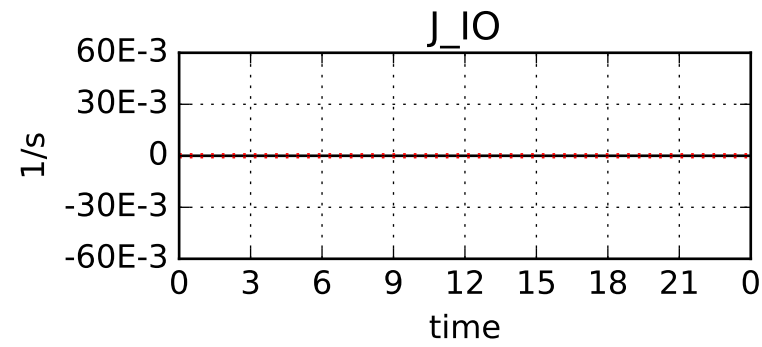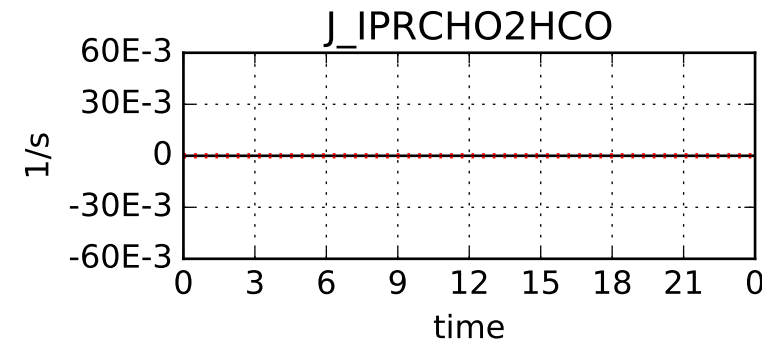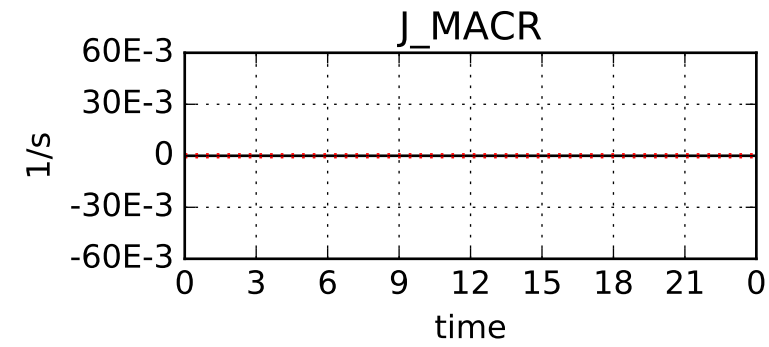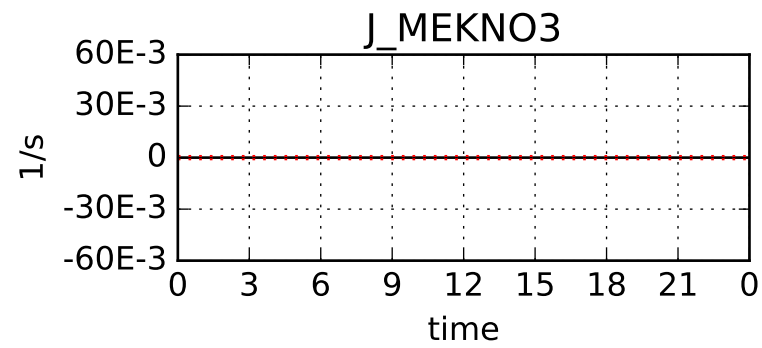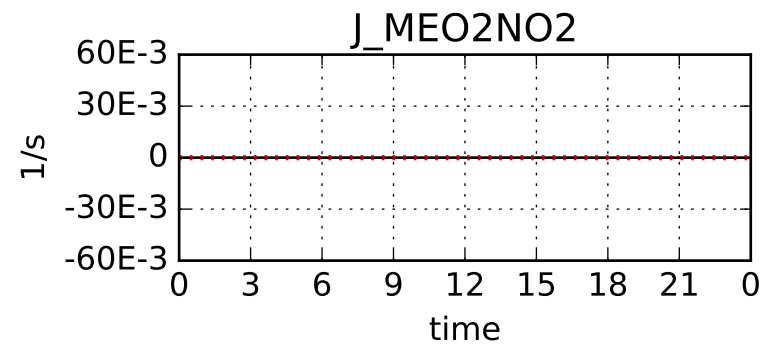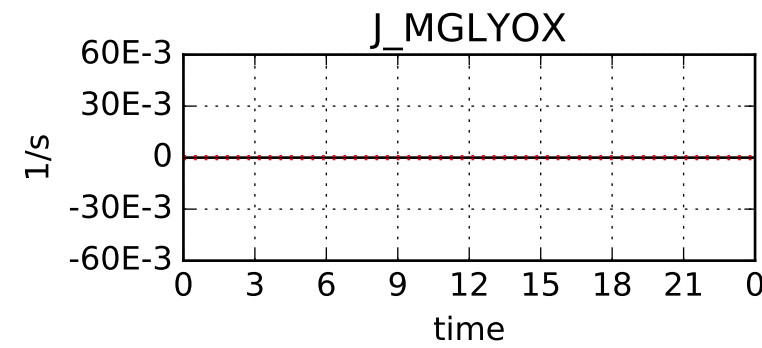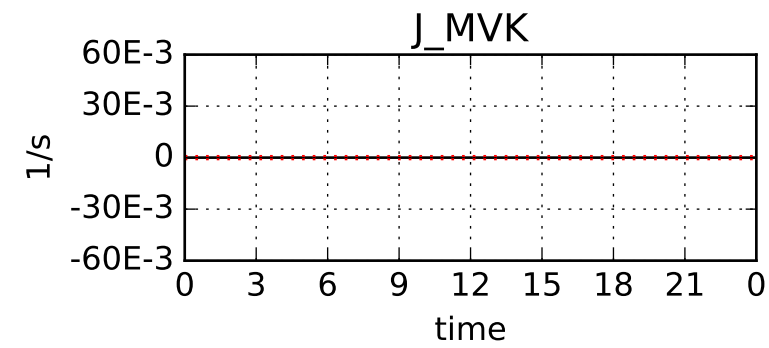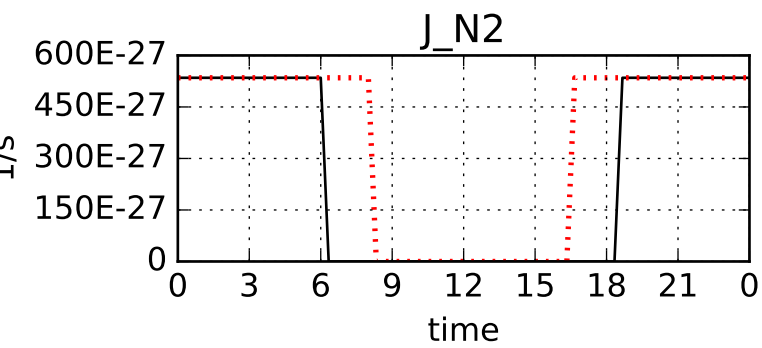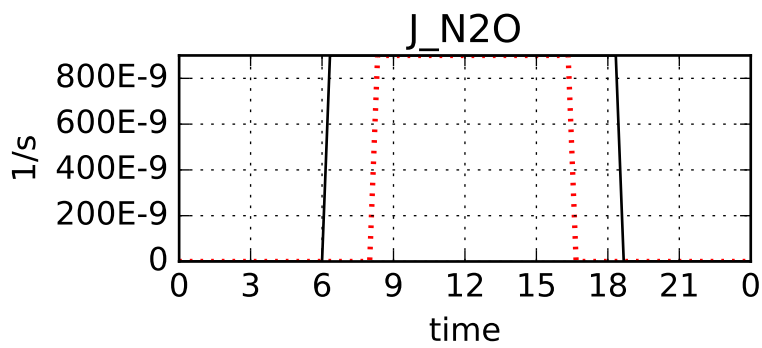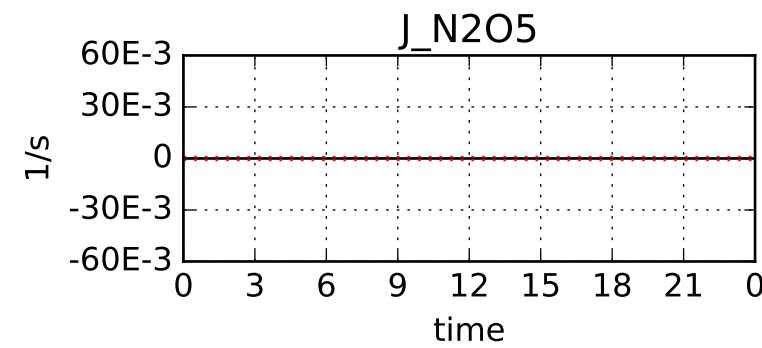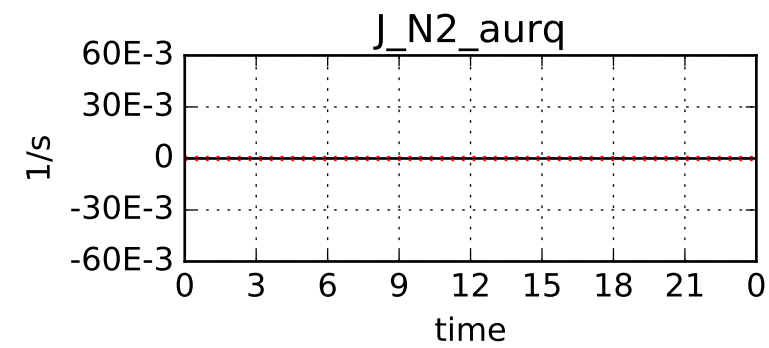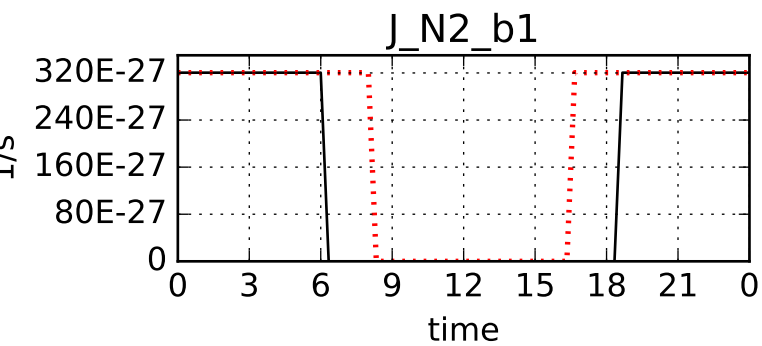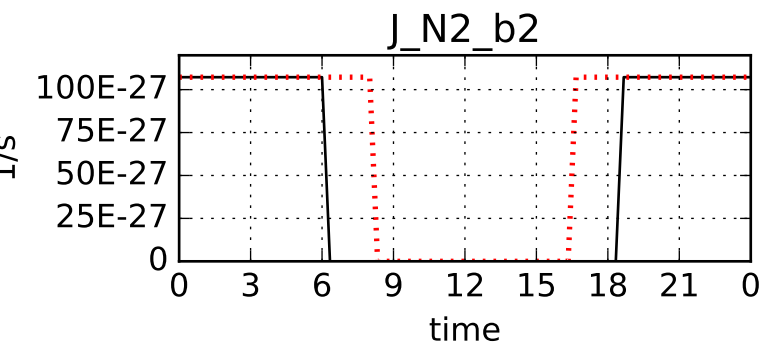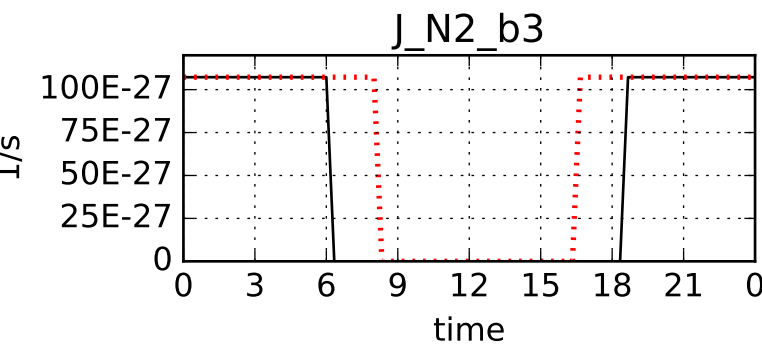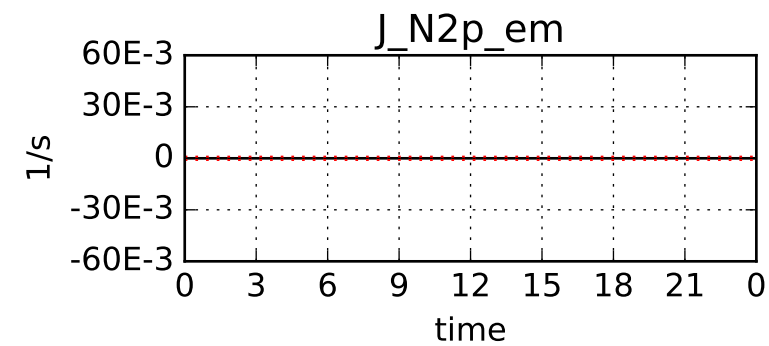

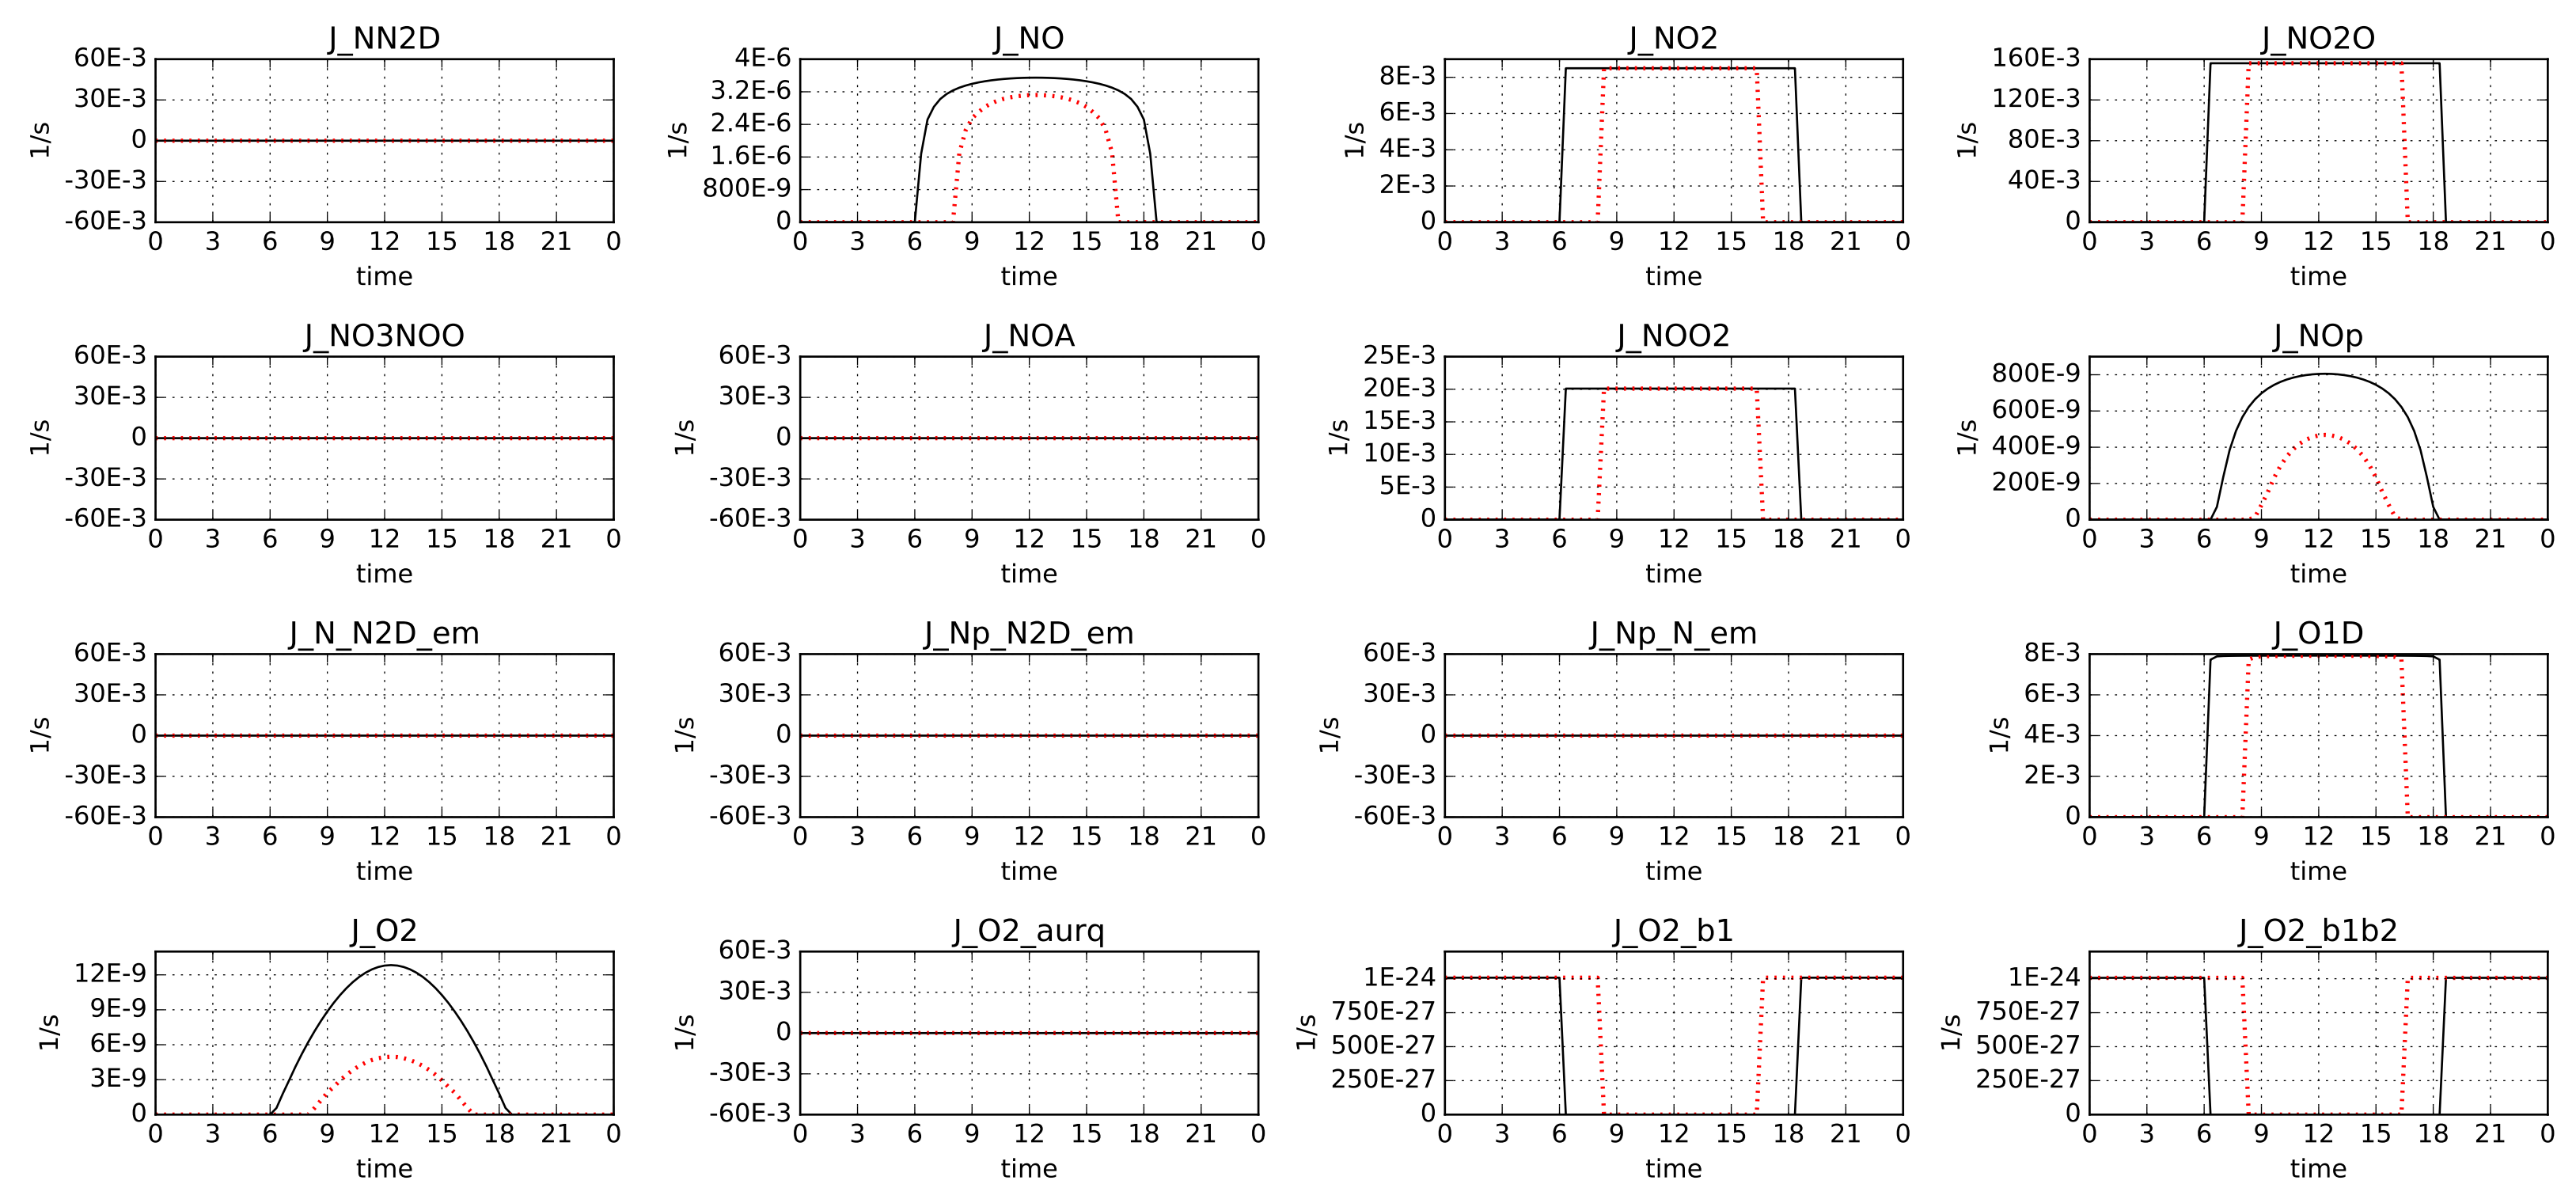

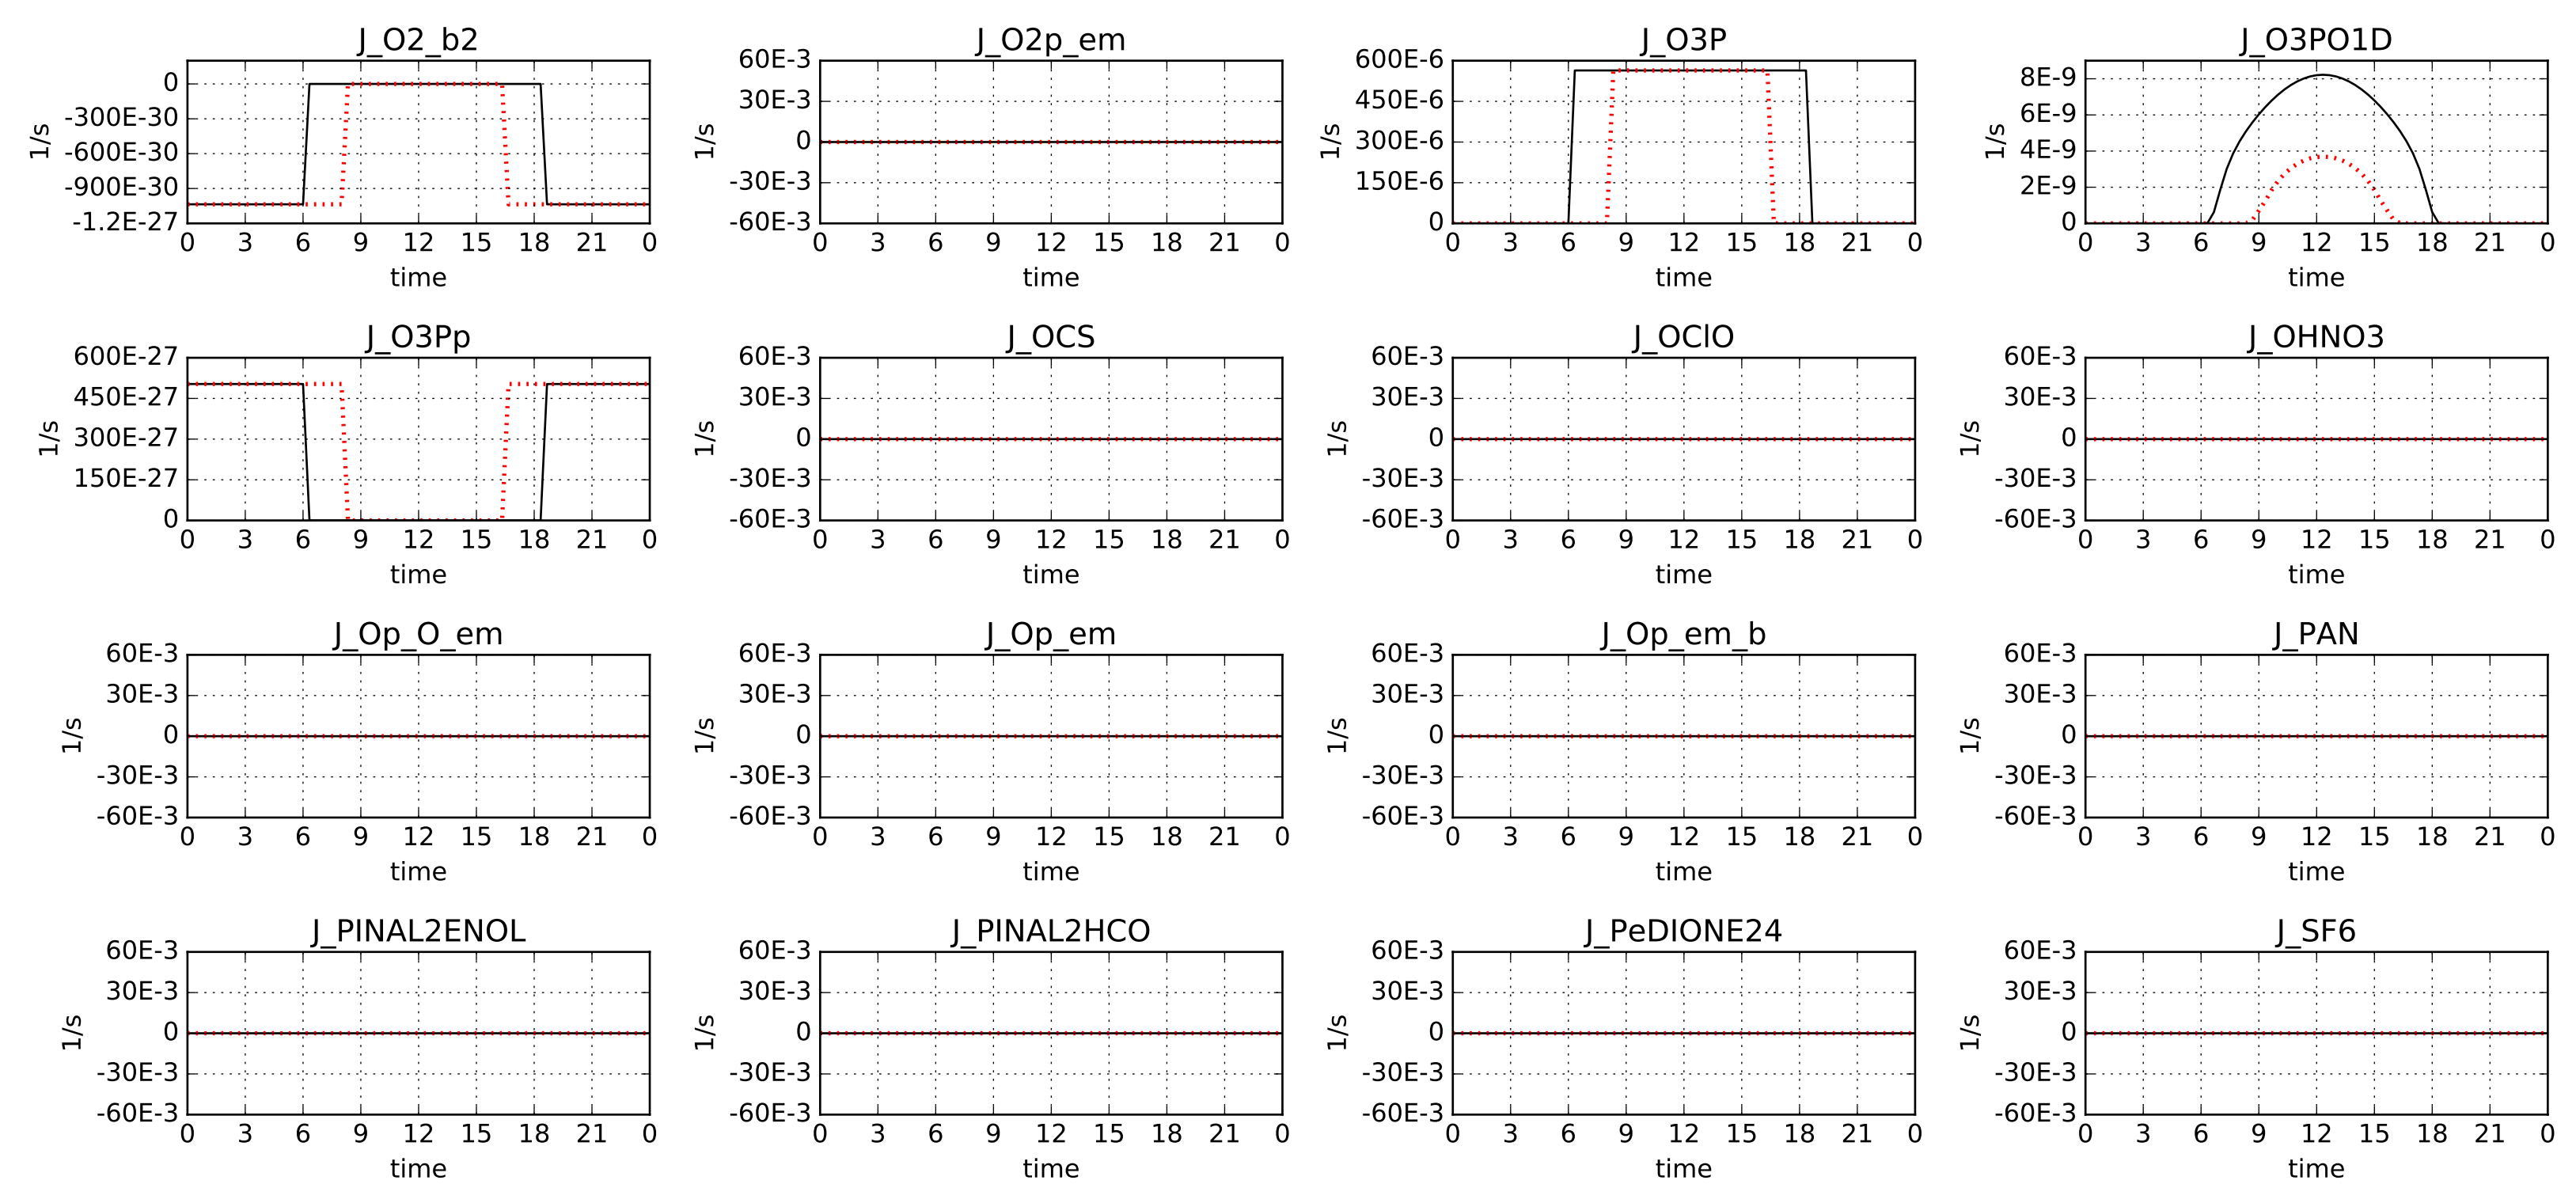



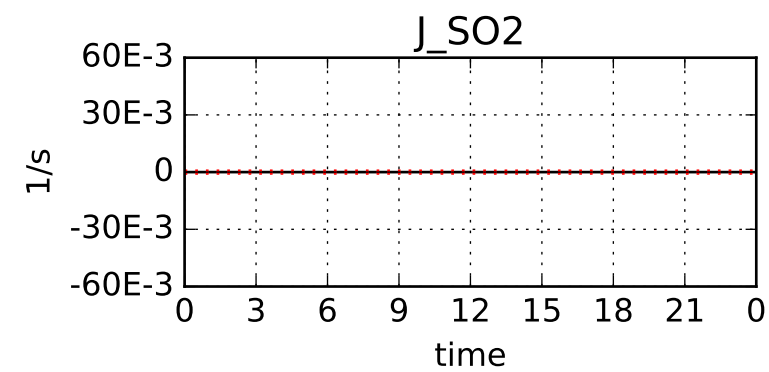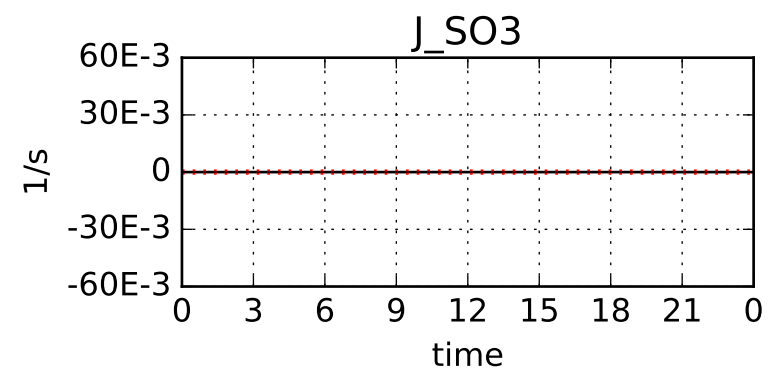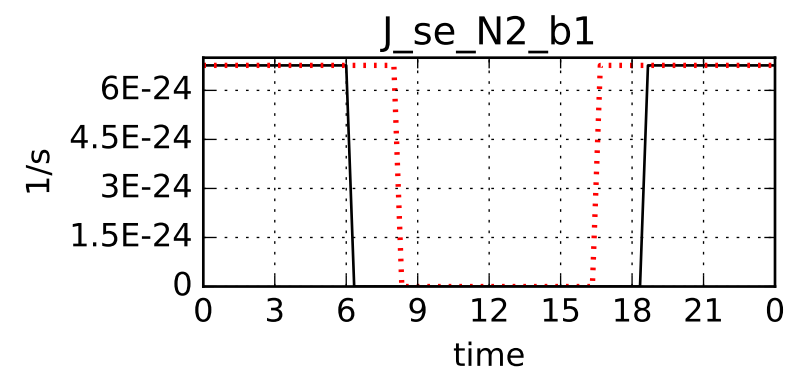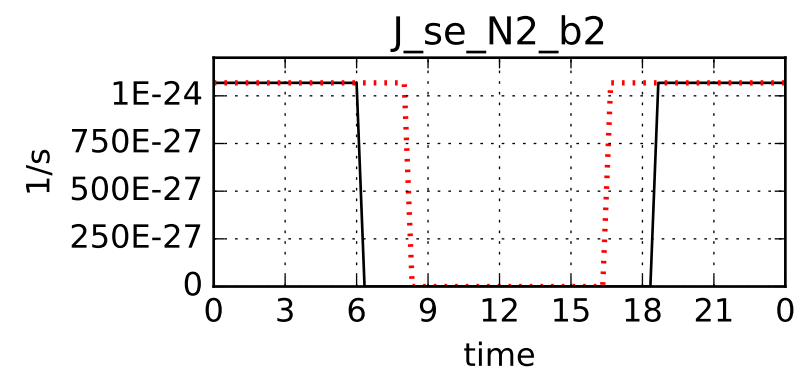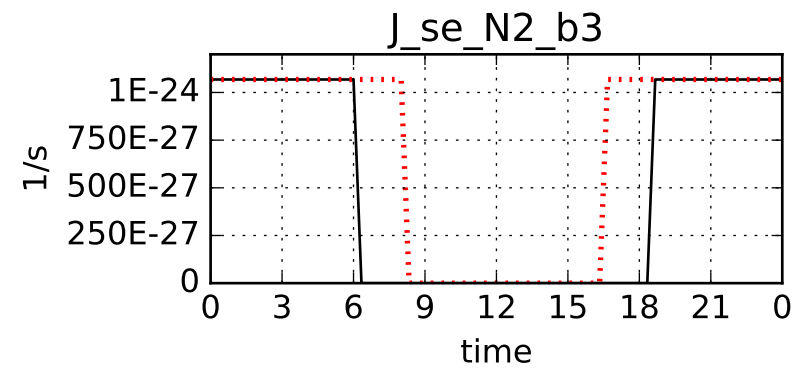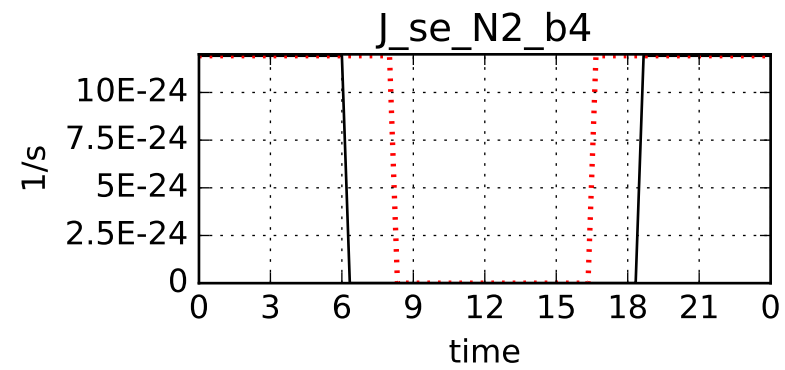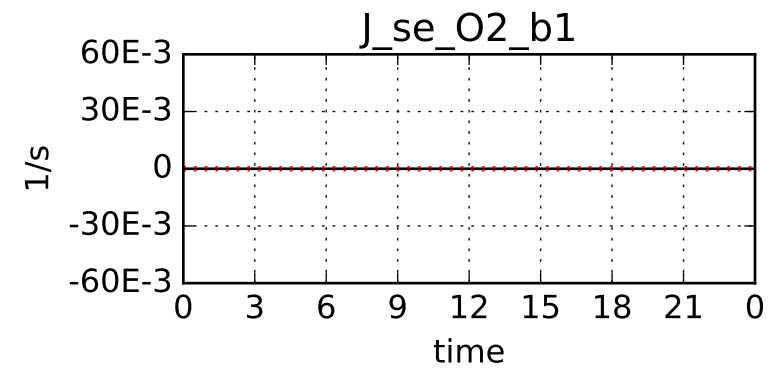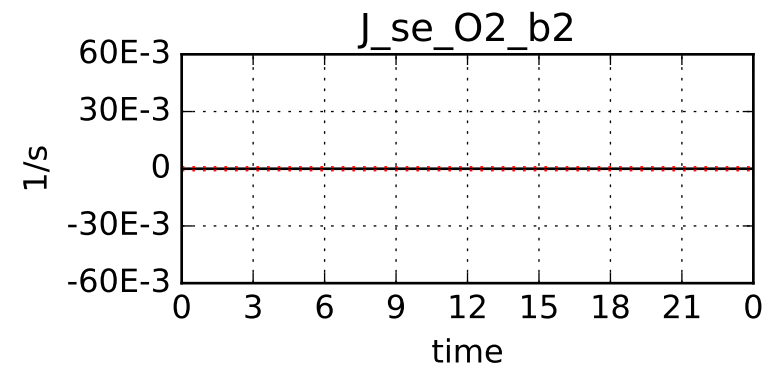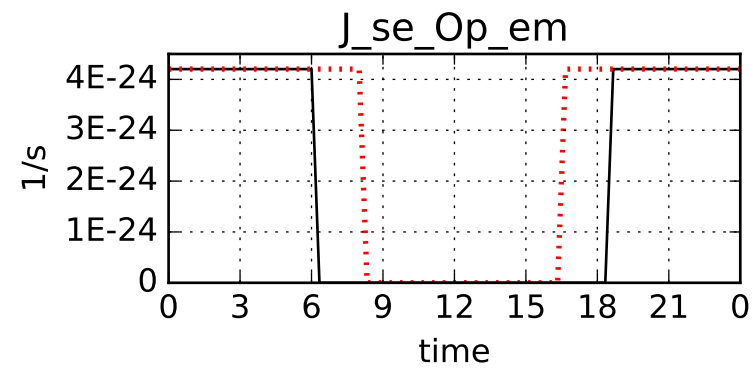

Supplement: Supplementary file 35 [file gmd-2018-201-supplement.zip]

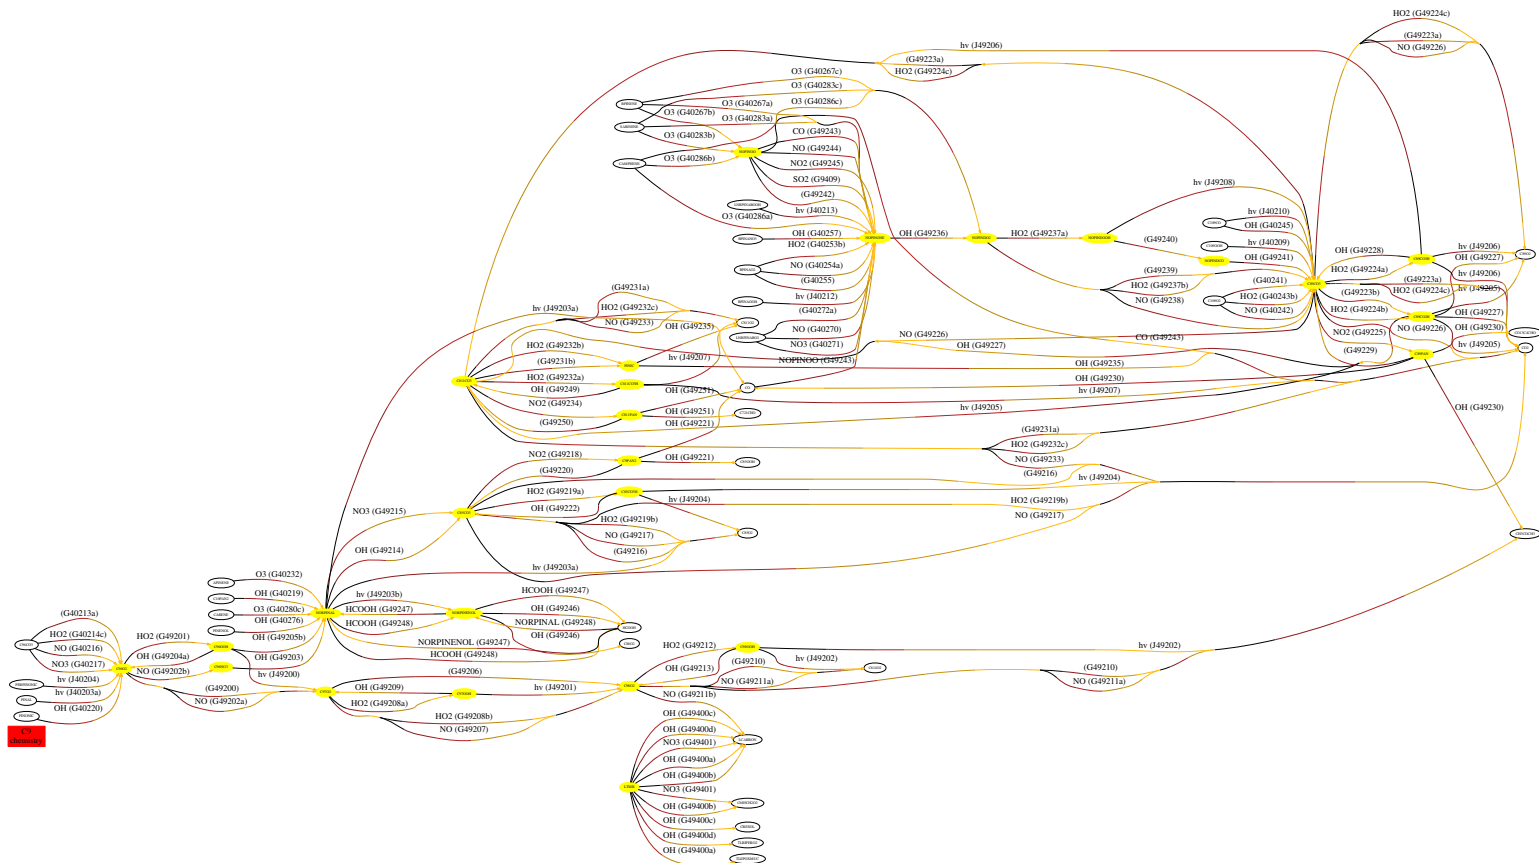

Supplement: Supplementary file 36 [file gmd-2018-201-supplement.zip]

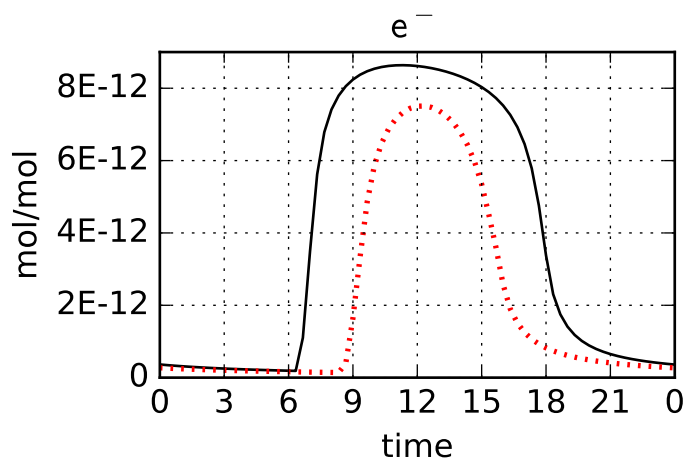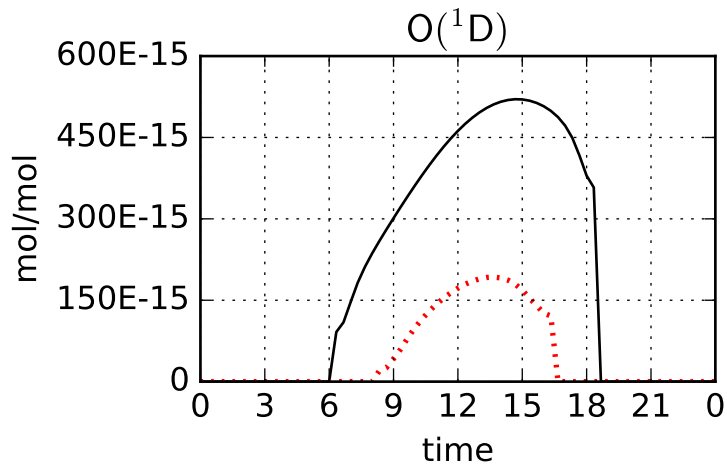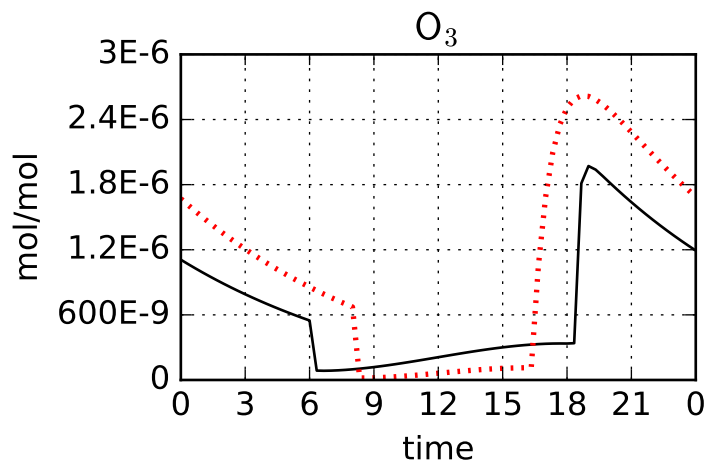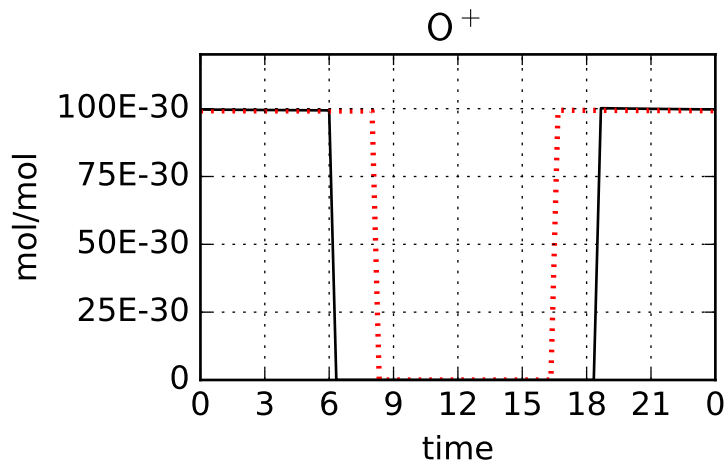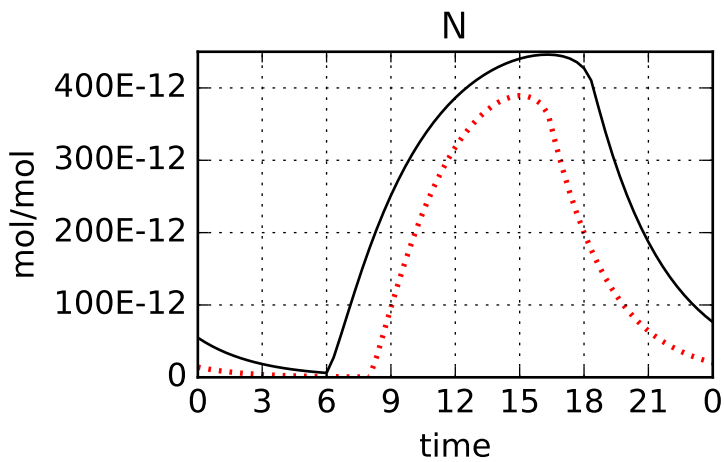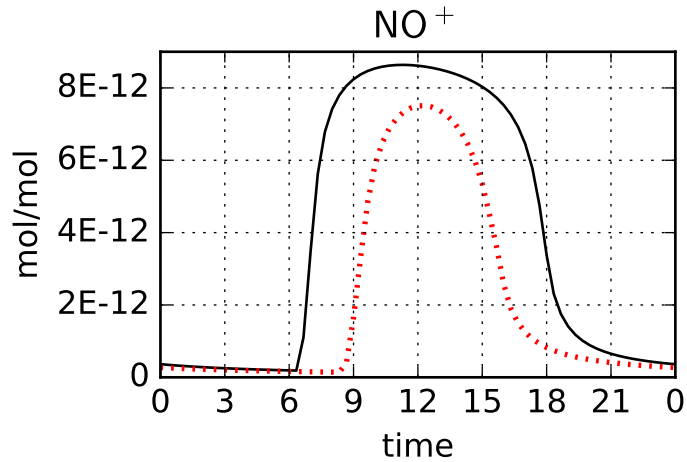

Supplement: Supplementary file 37 [file gmd-2018-201-supplement.zip]

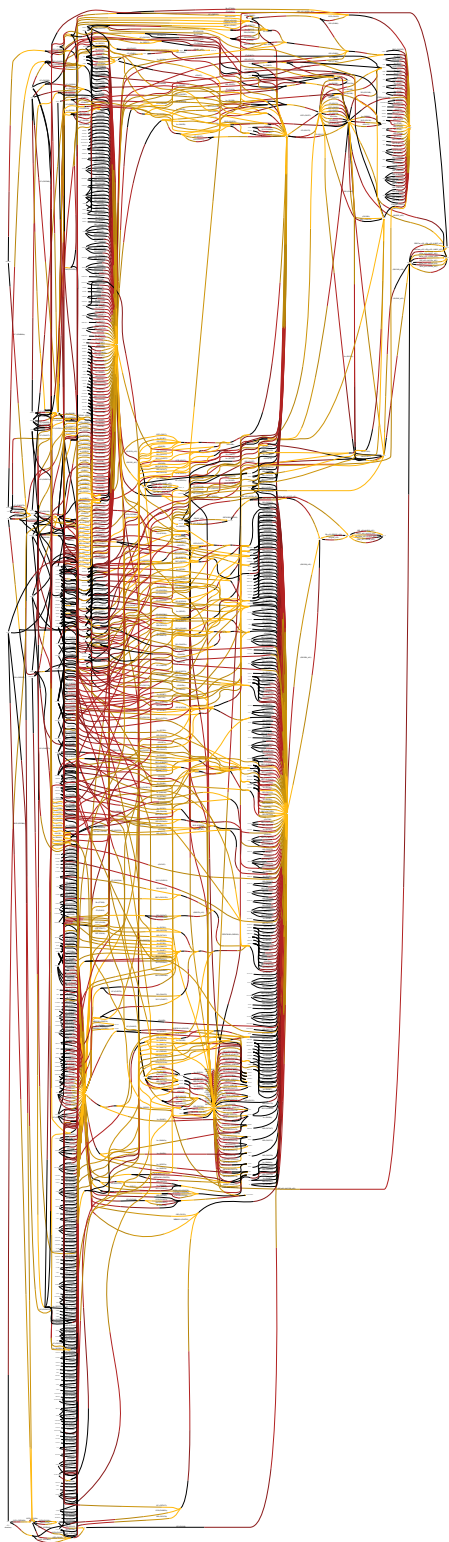

Supplement: Supplementary file 38 [file gmd-2018-201-supplement.zip]

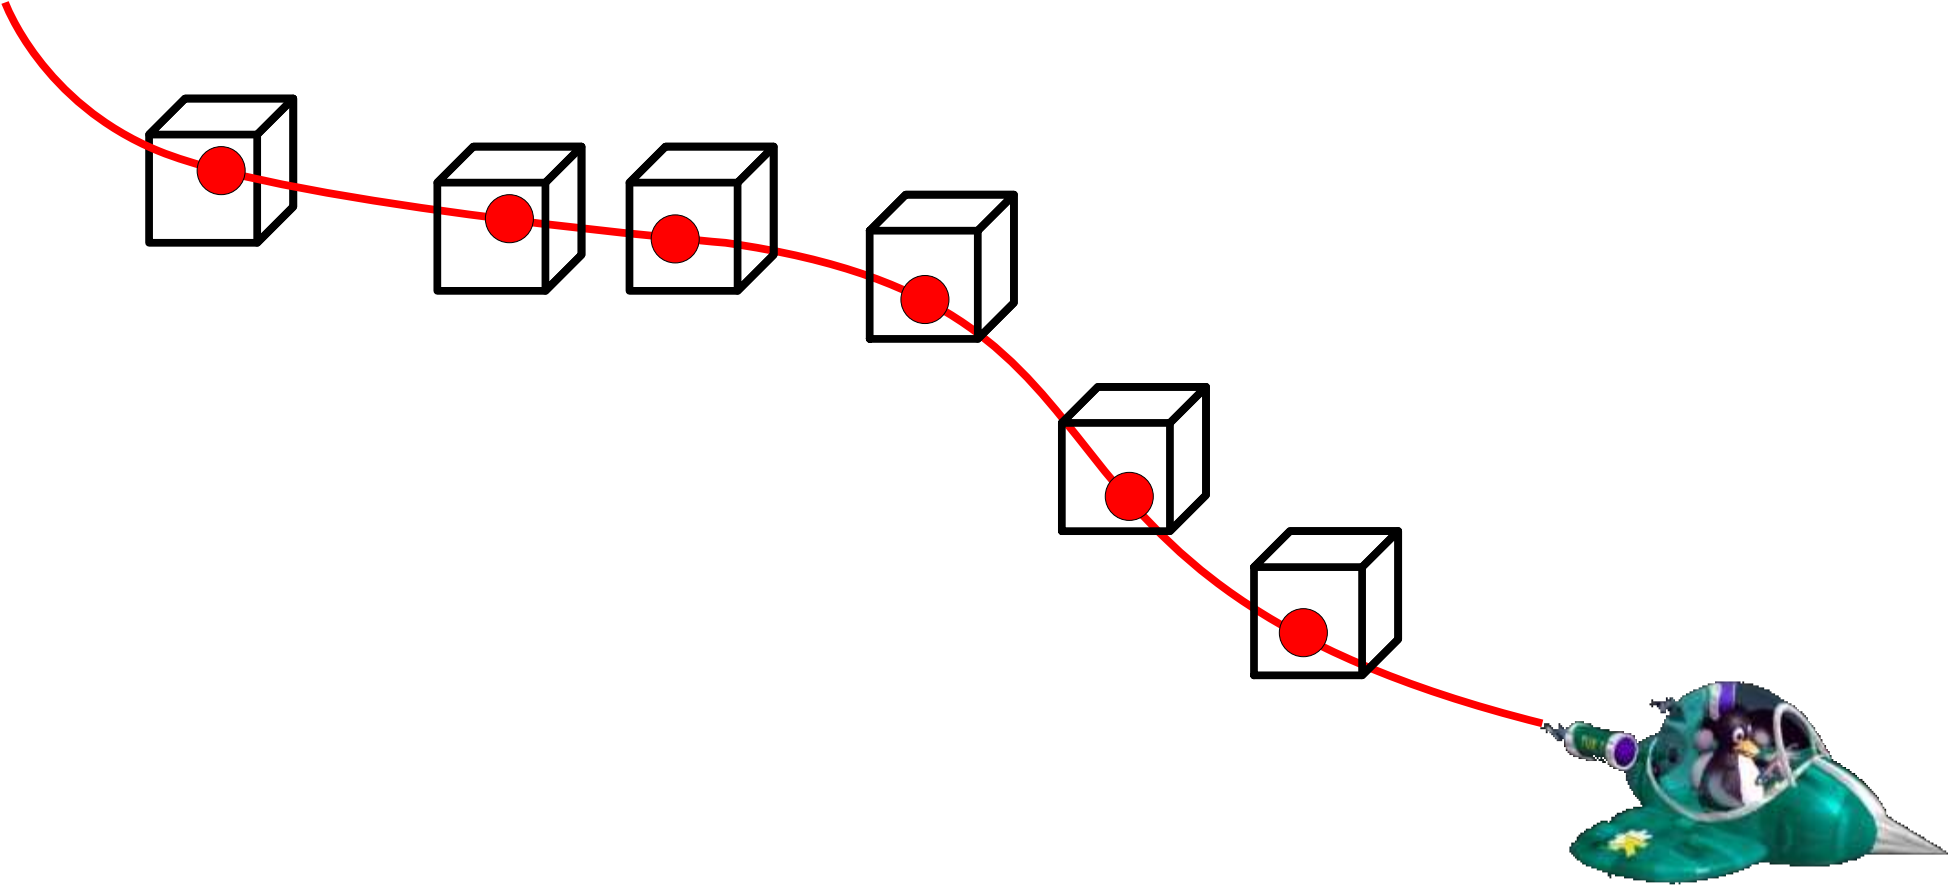

Supplement: Supplementary file 41 [file gmd-2018-201-supplement.zip]
